# Supplementary material for: Comparative Metabolomics Profiling Reveals Key Metabolites and Associated Pathways Regulating Tuber Dormancy in White Yam (<em>Dioscorea rotundata</em>)
Source: Preprints.org preprint supplement (doi:10.20944/preprints202303.0378.v1), 2023-03-21

# TNAU

## Sample Information

Analyzed by : Admin  
 Analyzed : 04-Aug-22 8:09:19 PM  
 Sample Type : Unknown  
 Level # : 1  
 Sample Name : C56-2  
 Sample ID : C56-2  
 IS Amount : [1]=1  
 Sample Amount : 1  
 Dilution Factor : 1  
 Vial # : 6  
 Injection Volume : 1.00  
 Data File : D:\GCMS-8040NX\Aug 2022\Users\04.08.2022\Data files\04082022-006.qgd  
 Org Data File : D:\GCMS-8040NX\Aug 2022\Users\04.08.2022\Data files\04082022-006.qgd  
 Method File : D:\GCMS-8040NX\Aug 2022\Users\04.08.2022\Method file\27072022\_methodfile.qgm  
 Org Method File : D:\GCMS-8040NX\Aug 2022\Users\04.08.2022\Method file\27072022\_methodfile.qgm  
 Report File :  
 Tuning File : D:\GCMS-8040NX\Aug 2022\Tuning Data\TUNING 04082022.qgt  
 [Comment]  
 Jerry samples  
 Modified by : Admin  
 Modified : 05-Aug-22 4:20:47 PM

Chromatogram C56-2 D:\GCMS-8040NX\Aug 2022\Users\04.08.2022\Data files\04082022-006.qgd

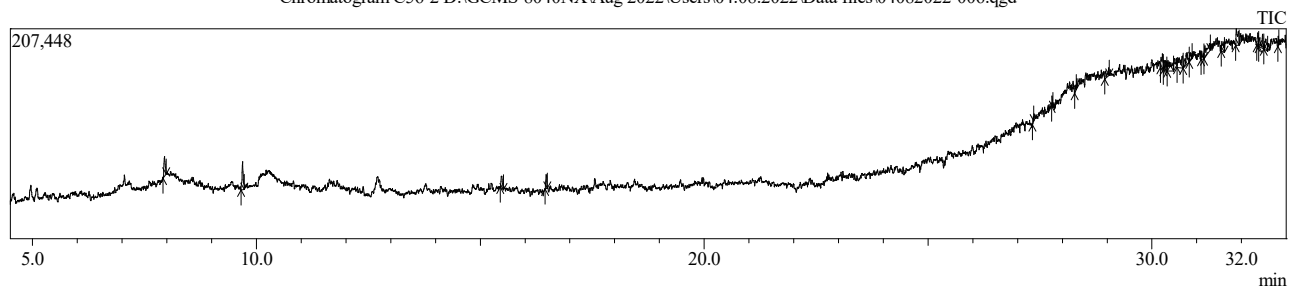

Peak Report TIC

| Peak# | R.Time | Area  | Area% | Height | Height% | A/H  | Similarity | Name                                          |
|-------|--------|-------|-------|--------|---------|------|------------|-----------------------------------------------|
| 1     | 7.945  | 38567 | 5.87  | 19767  | 7.81    | 1.95 | 86         | Tridecane                                     |
| 2     | 9.690  | 52192 | 7.94  | 27840  | 10.99   | 1.87 | 88         | Dodecane                                      |
| 3     | 15.472 | 25618 | 3.90  | 11690  | 4.62    | 2.19 | 38         | Lactic acid-13C3-2TMS                         |
| 4     | 16.472 | 21349 | 3.25  | 13567  | 5.36    | 1.57 | 82         | 2,2,4-Trimethyl-1,3-pentanediol diisobutyrate |
| 5     | 27.350 | 5249  | 0.80  | 5712   | 2.26    | 0.92 | 24         | 3,4-Dihydroxymandelic acid-4TMS               |
| 6     | 27.771 | 6594  | 1.00  | 10735  | 4.24    | 0.61 | 38         | Epinephrine-3TMS                              |
| 7     | 28.285 | 7613  | 1.16  | 5562   | 2.20    | 1.37 | 30         | 4-Hydroxybenzoic acid-2TMS                    |
| 8     | 29.033 | 23469 | 3.57  | 7966   | 3.15    | 2.95 | 32         | 4-Hydroxybenzoic acid-2TMS                    |
| 9     | 30.235 | 33541 | 5.10  | 14859  | 5.87    | 2.26 | 28         | Phosphoric acid-3TMS                          |
| 10    | 30.303 | 30187 | 4.59  | 10060  | 3.97    | 3.00 | 35         | Glycerol-3TMS                                 |
| 11    | 30.357 | 50679 | 7.71  | 10042  | 3.97    | 5.05 | 42         | 3-Hydroxybenzoic acid-2TMS                    |
| 12    | 30.684 | 58513 | 8.90  | 11675  | 4.61    | 5.01 | 34         | Lactitol-9TMS                                 |
| 13    | 30.765 | 47783 | 7.27  | 11226  | 4.43    | 4.26 | 38         | 2-Deoxy-glucose-4TMS(2)                       |
| 14    | 30.845 | 17273 | 2.63  | 6745   | 2.66    | 2.56 | 38         | 2-Methyl-3-hydroxyvaleric acid-2TMS           |
| 15    | 31.115 | 13758 | 2.09  | 8243   | 3.25    | 1.67 | 40         | 4-Aminobenzoic acid-2TMS                      |
| 16    | 31.283 | 53084 | 8.08  | 7781   | 3.07    | 6.82 | 28         | Batyl alcohol-2TMS                            |
| 17    | 31.560 | 27568 | 4.19  | 9537   | 3.77    | 2.89 | 32         | Lactitol-9TMS                                 |
| 18    | 31.886 | 46181 | 7.03  | 16107  | 6.36    | 2.87 | 36         | 5'-Methylthioadenosine-2TMS                   |
| 19    | 32.367 | 23393 | 3.56  | 13008  | 5.14    | 1.80 | 37         | 3-Hydroxybenzoic acid-2TMS                    |
| 20    | 32.470 | 35670 | 5.43  | 13878  | 5.48    | 2.57 | 41         | Arabinose-4TMS(1)                             |
| 21    | 32.520 | 30777 | 4.68  | 7872   | 3.11    | 3.91 | 27         | Psicose-5TMS(2)                               |
| 22    | 32.821 | 8313  | 1.26  | 9383   | 3.70    | 0.89 | 30         | 2-Deoxy-glucose-4TMS(1)                       |

# TNAU

| Peak# | R.Time | Area   | Area%  | Height | Height% | A/H | Similarity | Name |
|-------|--------|--------|--------|--------|---------|-----|------------|------|
|       |        | 657371 | 100.00 | 253255 | 100.00  |     |            |      |

Library

<< Target >>

Line#:1 R.Time:7.945(Scan#:690) MassPeaks:237

RawMode:Averaged 7.940-7.950(689-691) BasePeak:57.05(4895)

BG Mode:Calc. from Peak Group 1 - Event 1 Q3 Scan

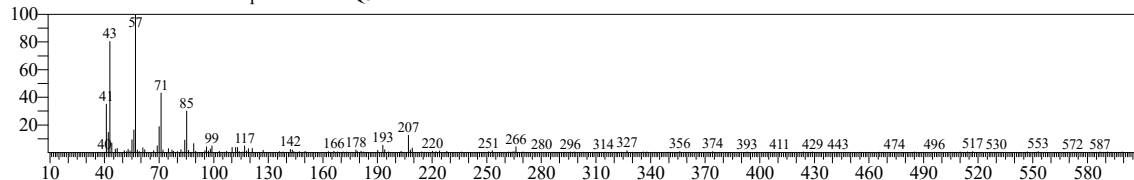

Hit#:1 Entry:40226 Library:NIST20M1.lib

SI:86 Formula:C13H28 CAS:629-50-5 MolWeight:184 RetIndex:1300

CompName:Tridecane \$\$ n-Tridecane \$\$ Tridecane, n-

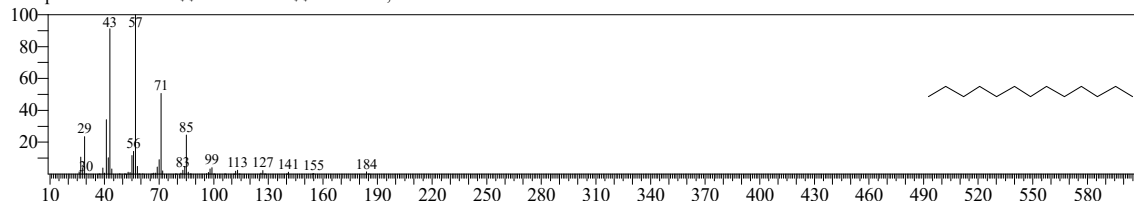

Hit#:2 Entry:21042 Library:NIST20M1.lib

SI:86 Formula:C11H24 CAS:1120-21-4 MolWeight:156 RetIndex:1100

CompName:Undecane \$\$ n-Undecane \$\$ Hendecane \$\$ n-C11H24 \$\$ UN 2330

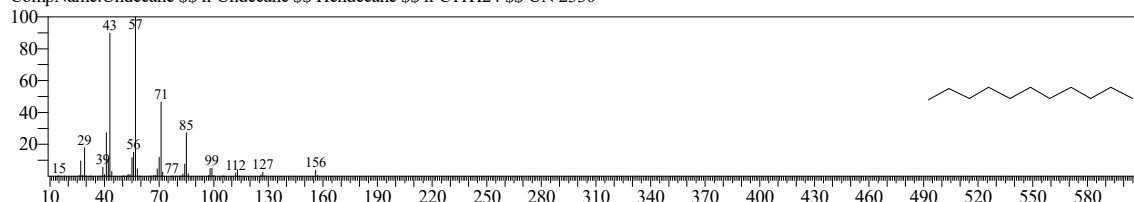

Hit#:3 Entry:13604 Library:NIST20M1.lib

SI:86 Formula:C10H22 CAS:124-18-5 MolWeight:142 RetIndex:1000

CompName:Decane \$\$ n-Decane \$\$ n-C10H22 \$\$ UN 2247

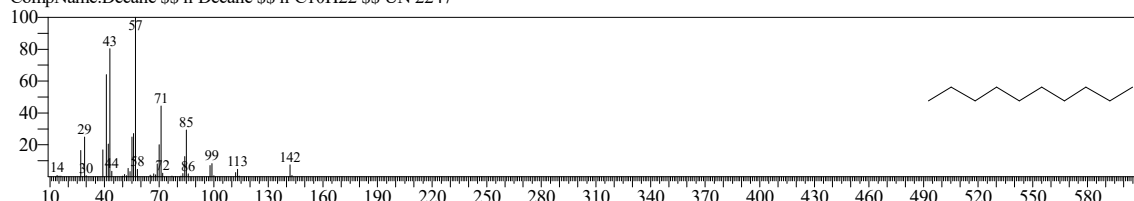

Hit#:4 Entry:30057 Library:NIST20M1.lib

SI:85 Formula:C12H26 CAS:112-40-3 MolWeight:170 RetIndex:1200

CompName:Dodecane \$\$ n-Dodecane \$\$ Adakane 12 \$\$ Ba 51-090453 \$\$ CH3(CH2)10CH3 \$\$ Bihexyl \$\$ Dihexyl \$\$ Duodecane \$\$ NSC 8714

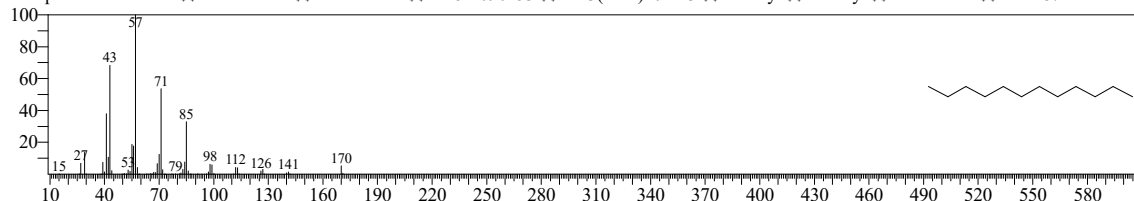

# TNAU

<< Target >>

Line#:1 R.Time:7.945(Scan#:690) MassPeaks:237

RawMode:Averaged 7.940-7.950(689-691) BasePeak:57.05(4895)

BG Mode:Calc. from Peak Group 1 - Event 1 Q3 Scan

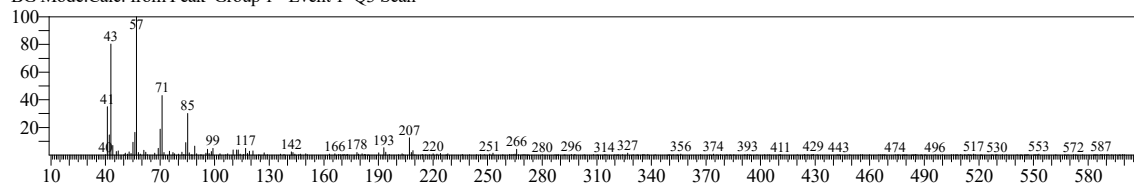

Hit#:5 Entry:27737 Library:NIST20R.lib

SI:85 Formula:C16H34 CAS:544-76-3 MolWeight:226 RetIndex:1600

CompName:Hexadecane \$\$ n-Cetane \$\$ n-Hexadecane \$\$ Cetane

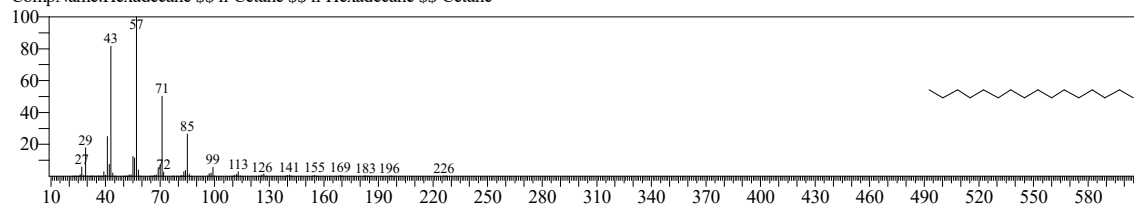

# TNAU

<< Target >>

Line# 2 R.Time: 9.690 (Scan#: 1039) MassPeaks: 313

RawMode: Averaged 9.685-9.695 (1038-1040) BasePeak: 57.10 (5470)

BG Mode: Calc. from Peak Group 1 - Event 1 Q3 Scan

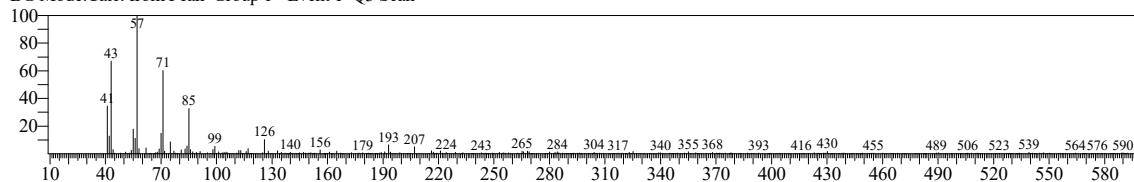

Hit#: 1 Entry: 30057 Library: NIST20M1.lib

SI: 88 Formula: C<sub>12</sub>H<sub>26</sub> CAS: 112-40-3 MolWeight: 170 RetIndex: 1200

CompName: Dodecane \$ n-Dodecane \$ Adakane 12 \$ Ba 51-090453 \$ CH<sub>3</sub>(CH<sub>2</sub>)<sub>10</sub>CH<sub>3</sub> \$ Bihexyl \$ Dihexyl \$ Duodecane \$ NSC 8714

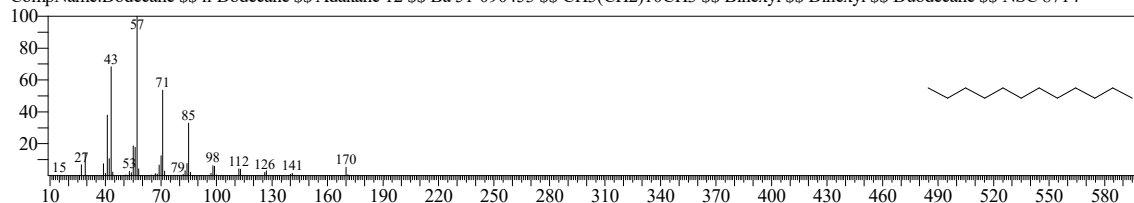

Hit#: 2 Entry: 12893 Library: NIST20R.lib

SI: 87 Formula: C<sub>11</sub>H<sub>24</sub> CAS: 13151-34-3 MolWeight: 156 RetIndex: 1051

CompName: Decane, 3-methyl- \$ 3-Methyldecane \$ 2-Ethylnonane

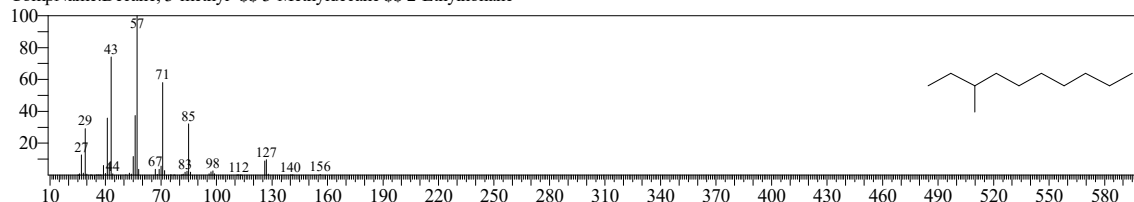

Hit#: 3 Entry: 12898 Library: NIST20R.lib

SI: 87 Formula: C<sub>11</sub>H<sub>24</sub> CAS: 1120-21-4 MolWeight: 156 RetIndex: 1100

CompName: Undecane \$ n-Undecane \$ Hendecane \$ n-C<sub>11</sub>H<sub>24</sub> \$ UN 2330

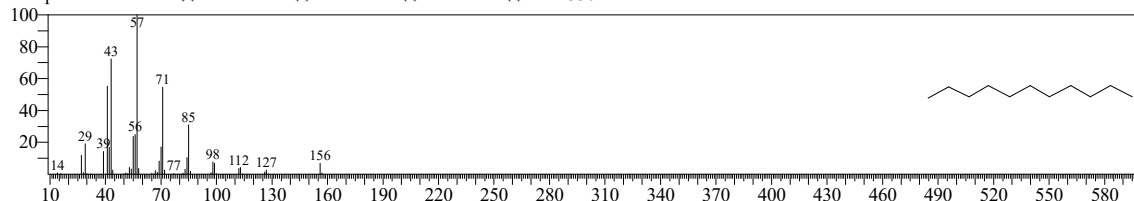

Hit#: 4 Entry: 19412 Library: NIST20R.lib

SI: 87 Formula: C<sub>13</sub>H<sub>28</sub> CAS: 629-50-5 MolWeight: 184 RetIndex: 1300

CompName: Tridecane \$ n-Tridecane \$ Tridecane, n-

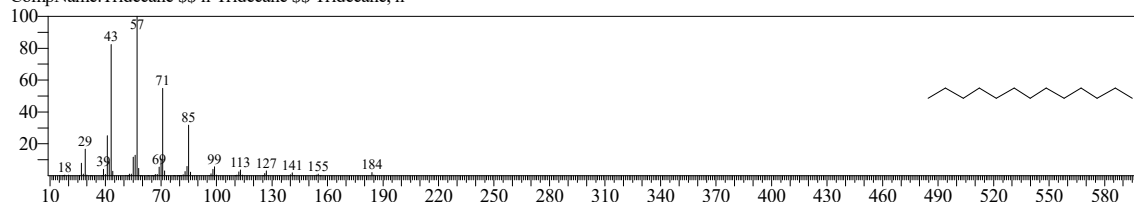

Hit#: 5 Entry: 22497 Library: NIST20R.lib

SI: 87 Formula: C<sub>14</sub>H<sub>30</sub> CAS: 629-59-4 MolWeight: 198 RetIndex: 1400

CompName: Tetradecane \$ n-Tetradecane

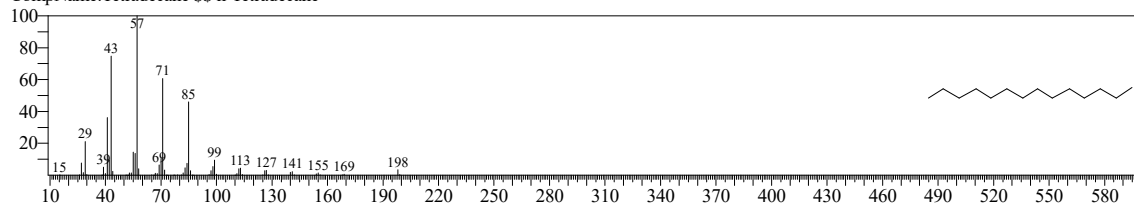

# TNAU

<< Target >>

Line#3 R.Time:15.470(Scan#:2195) MassPeaks:314

RawMode:Averaged 15.465-15.475(2194-2196) BasePeak:191.10(2752)

BG Mode:Calc. from Peak Group 1 - Event 1 Q3 Scan

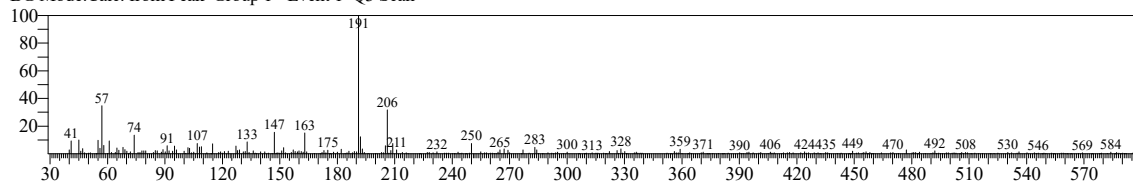

Hit#:1 Entry:9 Library:OA\_TMS\_DB5\_67min\_V3.lib

SI:38 Formula: CAS:0-00-0 MolWeight:237 RetIndex:1062

CompName:Lactic acid-13C3-2TMS ;

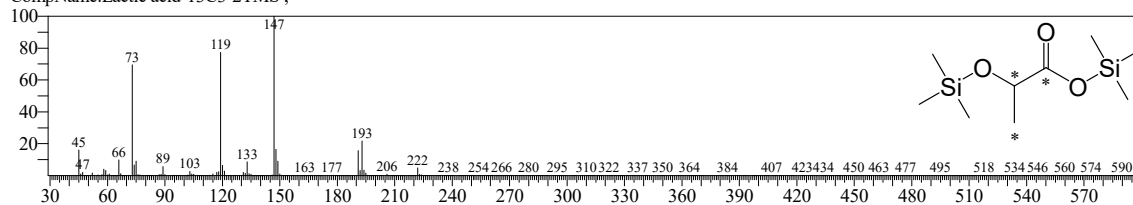

Hit#:2 Entry:35 Library:OA\_TMS\_DB5\_67min\_V3.lib

SI:37 Formula: C10H24O3Si2 CAS:300-85-6 MolWeight:248 RetIndex:1161

CompName:3-Hydroxybutyric acid-2TMS ; 3-hydroxybutanoic acid

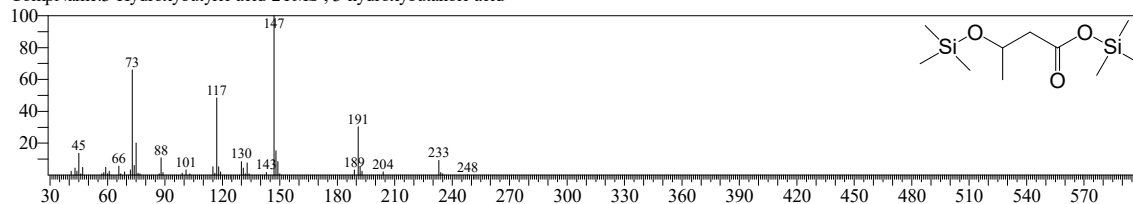

Hit#:3 Entry:4 Library:OA\_TMS\_DB5\_67min\_V3.lib

SI:37 Formula: C8H23NOSi2 CAS:141-43-5 MolWeight:205 RetIndex:1029

CompName:2-Aminoethanol-2TMS ; 2-aminoethanol

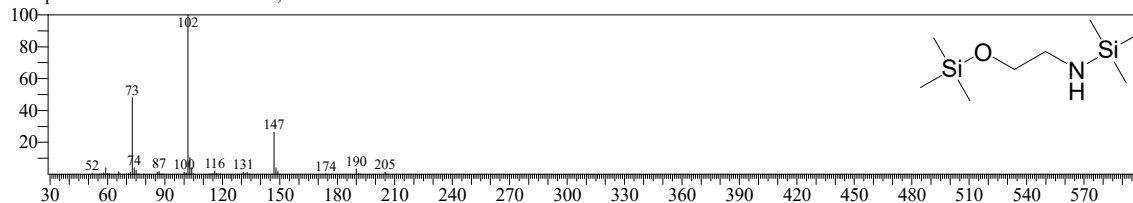

Hit#:4 Entry:24 Library:OA\_TMS\_DB5\_67min\_V3.lib

SI:35 Formula: CAS:0-00-0 MolWeight:236 RetIndex:1130

CompName:Oxalic acid-13C2-2TMS ;

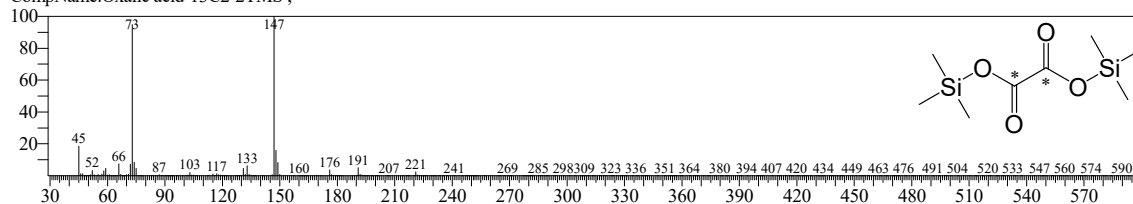

Hit#:5 Entry:539 Library:OA\_TMS\_DB5\_67min\_V3.lib

SI:33 Formula: C27H60O3Si2 CAS:544-62-7 MolWeight:488 RetIndex:2684

CompName:Batyl alcohol-2TMS ; 3-octadecoxypropane-1,2-diol

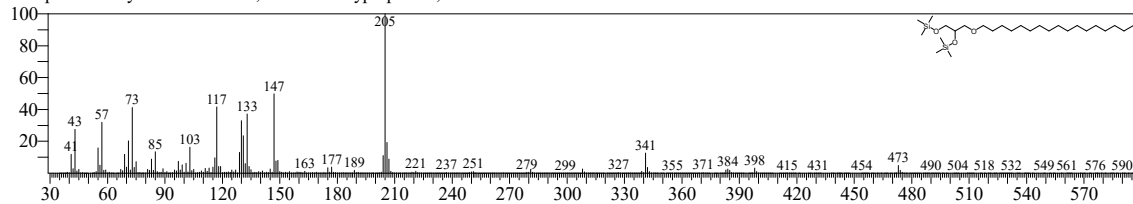

# TNAU

<< Target >>

Line#4 R.Time:16.470(Scan#:2395) MassPeaks:270

RawMode:Averaged 16.465-16.475(2394-2396) BasePeak:71.05(6519)

BG Mode:Calc. from Peak Group 1 - Event 1 Q3 Scan

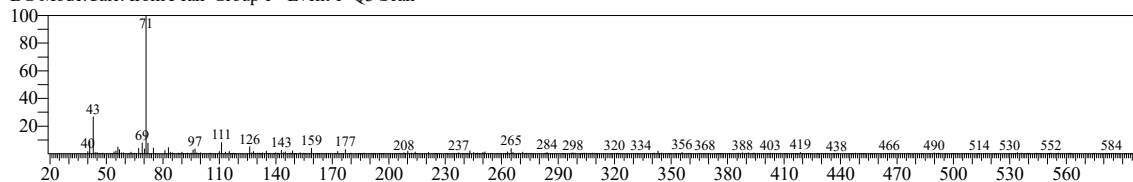

Hit#1 Entry:34622 Library:NIST20R.lib

SI:82 Formula:C16H30O4 CAS:6846-50-0 MolWeight:286 RetIndex:1605

CompName:2,2,4-Trimethyl-1,3-pentanediol diisobutyrate \$\$ Propanoic acid, 2-methyl-, 2,2-dimethyl-1-(1-methylethyl)-1,3-propanediol ester \$\$ 1,3-Pentan

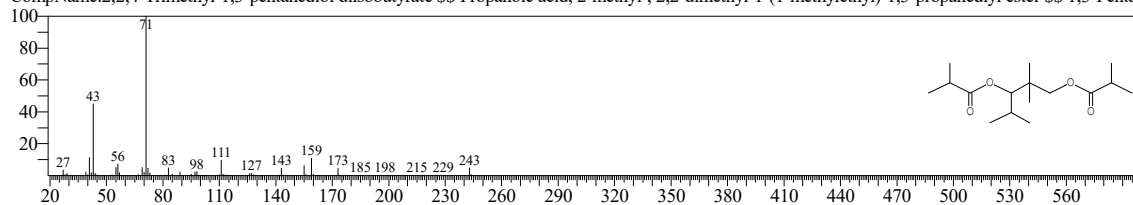

Hit#2 Entry:146809 Library:NIST20M1.lib

SI:79 Formula:C16H30O4 CAS:0-00-0 MolWeight:286 RetIndex:1605

CompName:Pentanoic acid, 2,2,4-trimethyl-3-carboxyisopropyl, isobutyl ester \$\$ 1-Isobutyl 4-isopropyl 3-isopropyl-2,2-dimethylsuccinate #

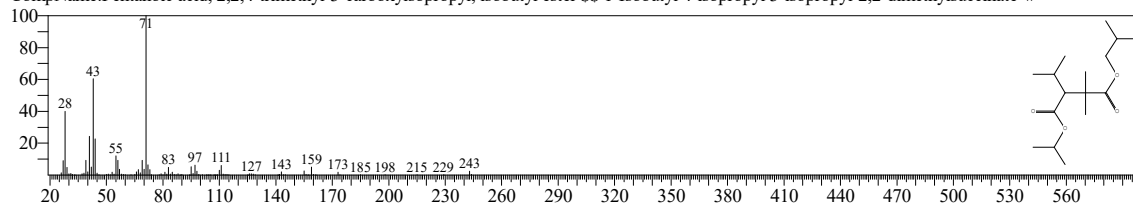

Hit#3 Entry:6356 Library:NIST20R.lib

SI:78 Formula:C8H16O CAS:1004-29-1 MolWeight:128 RetIndex:948

CompName:Furan, 2-butyltetrahydro- \$\$ Octane, 1,4-epoxy- \$\$ 2-Butyltetrahydrofuran

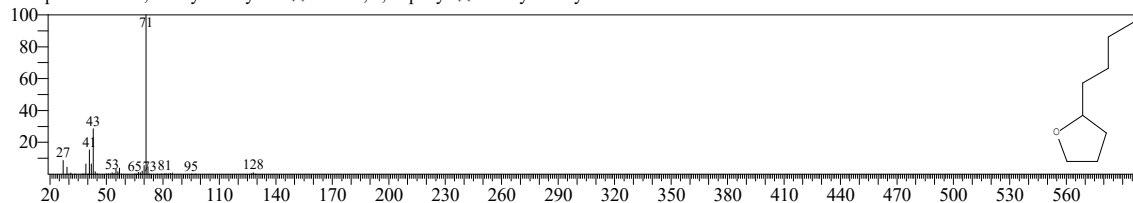

Hit#4 Entry:64203 Library:NIST20M1.lib

SI:77 Formula:C8H12N4O3 CAS:309735-27-1 MolWeight:212 RetIndex:1980

CompName:Furazan-3-carboxamide, 4-amino-N-(2-tetrahydrofurfuryl)- \$\$ 4-Amino-N-(tetrahydro-2-furanylmethyl)-1,2,5-oxadiazole-3-carboxamide #

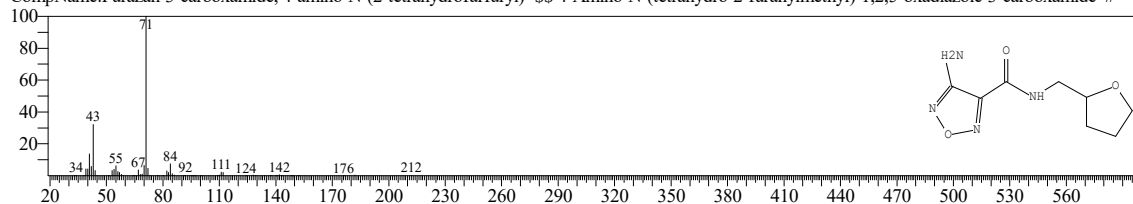

Hit#5 Entry:13419 Library:NIST20M1.lib

SI:77 Formula:C8H14O2 CAS:73373-15-6 MolWeight:142 RetIndex:1079

CompName:2,3'-Bifuran, octahydro-

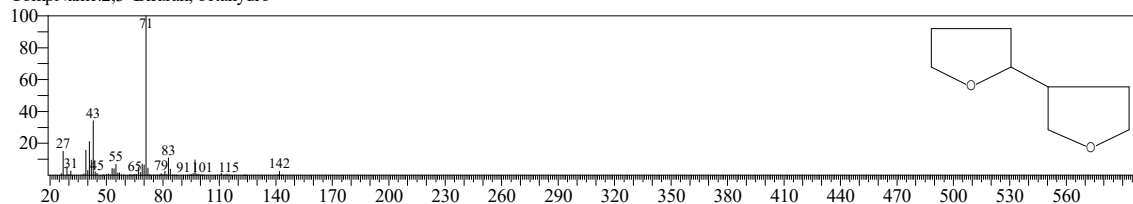

# TNAU

<< Target >>

Line#:5 R.Time:27.350(Scan#:4571) MassPeaks:258

RawMode:Averaged 27.345-27.355(4570-4572) BasePeak:207.05(736)

BG Mode:Calc. from Peak Group 1 - Event 1 Q3 Scan

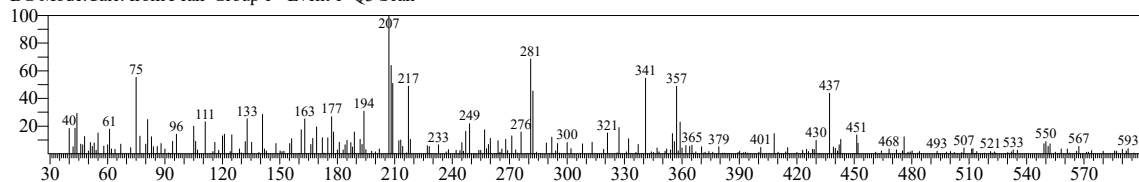

Hit#:1 Entry:402 Library:OA TMS\_DB5\_67min\_V3.lib

SI:24 Formula:C20H42O4Si4 CAS:775-01-9 MolWeight:458 RetIndex:1942

CompName:3,4-Dihydroxymandelic acid-4TMS ; 2-(3,4-dihydroxyphenyl)-2-hydroxyacetic acid

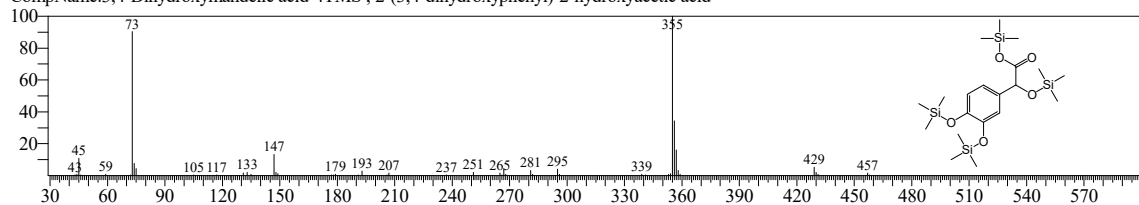

Hit#:2 Entry:330 Library:OA TMS\_DB5\_67min\_V3.lib

SI:23 Formula:C12H17NO3Si CAS:66407-11-2 MolWeight:251 RetIndex:1849

CompName:Hippuric acid-TMS ; 2-benzamidoacetic acid

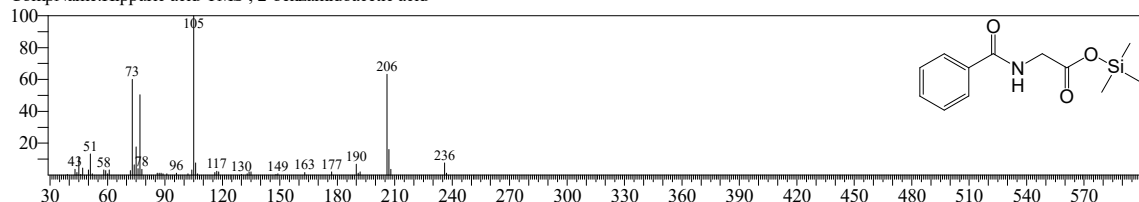

Hit#:3 Entry:361 Library:OA TMS\_DB5\_67min\_V3.lib

SI:23 Formula:C9H14N2O2Si CAS:104-98-3 MolWeight:210 RetIndex:1896

CompName:Urocanic acid-TMS ; (E)-3-(1H-imidazol-5-yl)prop-2-enoic acid

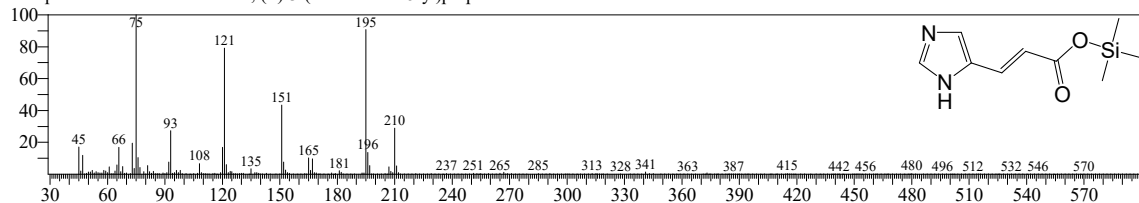

Hit#:4 Entry:24 Library:FA\_ME\_SP2560\_EI\_V3.lib

SI:22 Formula:C21H40O2 CAS:5561-99-9 MolWeight:324 RetIndex:2874

CompName:Methyl cis-11-icosenoate ; ; Icos-11-enoic acid

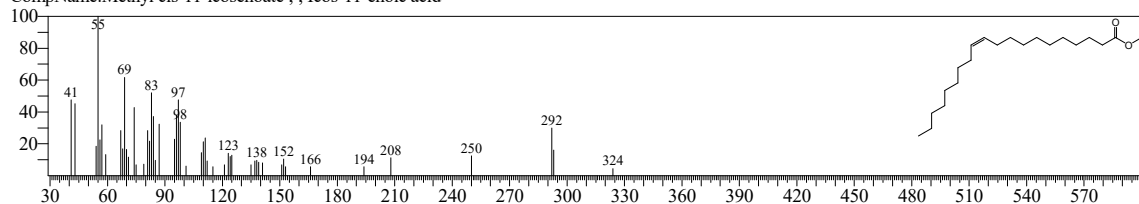

Hit#:5 Entry:394 Library:OA TMS\_DB5\_67min\_V3.lib

SI:22 Formula:C17H44NO7PSi4 CAS:585-18-2 MolWeight:517 RetIndex:1935

CompName:Erythrose 4-phosphate-meto-4TMS(2) ; [(2R,3R)-2,3-dihydroxy-4-oxobutyl] dihydrogen phosphate

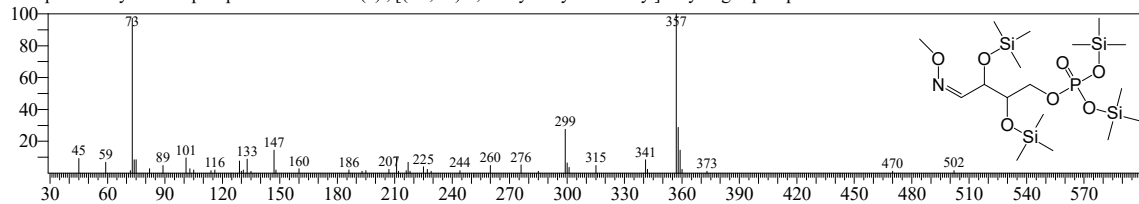

# TNAU

<< Target >>

Line#6 R.Time:27.770(Scan#:4655) MassPeaks:275

RawMode:Averaged 27.765-27.775(4654-4656) BasePeak:191.00(807)

BG Mode:Calc. from Peak Group 1 - Event 1 Q3 Scan

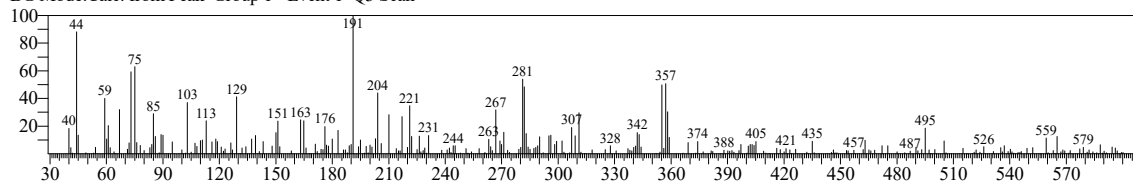

Hit#1 Entry:343 Library:OA\_TMS\_DB5\_67min\_V3.lib

SI:38 Formula:C18H37NO3Si3 CAS:51-43-4 MolWeight:399 RetIndex:1868

CompName:Epinephrine-3TMS ; 4-[(1R)-1-hydroxy-2-(methylamino)ethyl]benzene-1,2-diol

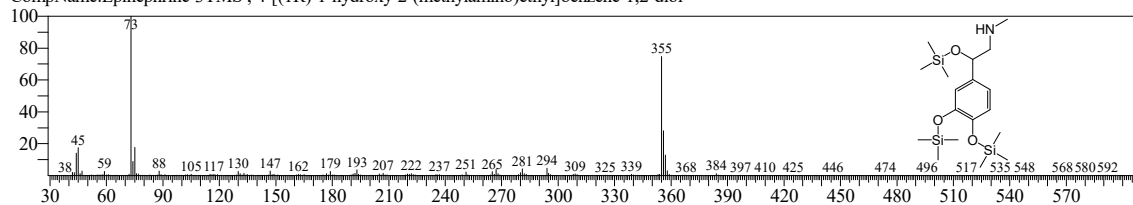

Hit#2 Entry:402 Library:OA\_TMS\_DB5\_67min\_V3.lib

SI:36 Formula:C20H42O4Si4 CAS:775-01-9 MolWeight:458 RetIndex:1942

CompName:3,4-Dihydroxymandelic acid-4TMS ; 2-(3,4-dihydroxyphenyl)-2-hydroxyacetic acid

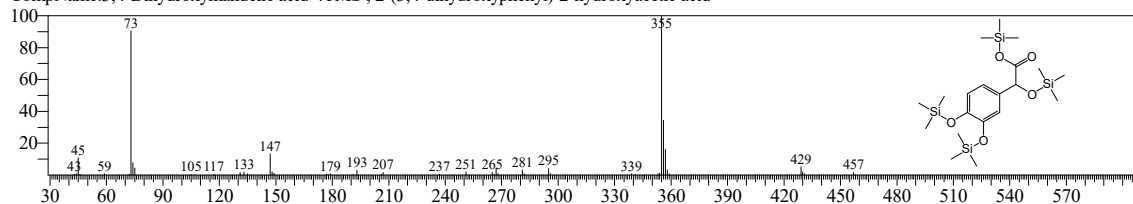

Hit#3 Entry:345 Library:OA\_TMS\_DB5\_67min\_V3.lib

SI:34 Formula:C21H52O6Si5 CAS:59-23-4 MolWeight:540 RetIndex:1868

CompName:Galactose-5TMS(2) ; (3R,4S,5R,6R)-6-(hydroxymethyl)oxane-2,3,4,5-tetrol

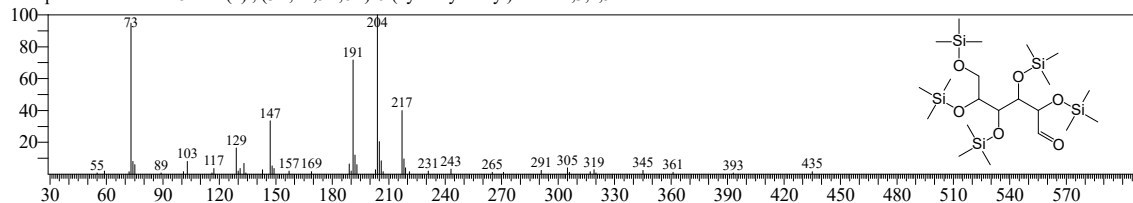

Hit#4 Entry:349 Library:OA\_TMS\_DB5\_67min\_V3.lib

SI:34 Formula:C21H52O6Si5 CAS:2595-97-3 MolWeight:540 RetIndex:1874

CompName:Allose-5TMS ; (2R,3R,4R,5R)-2,3,4,5,6-pentahydroxyhexanal

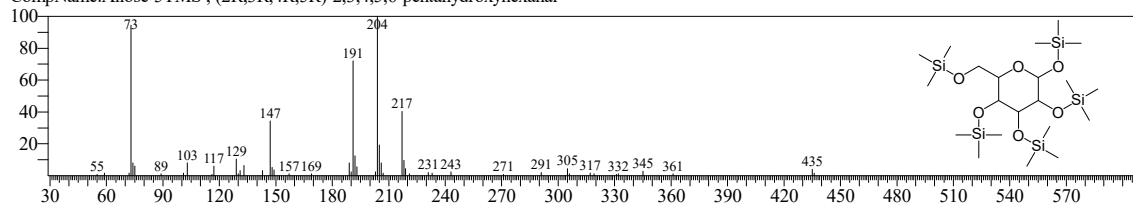

Hit#5 Entry:306 Library:OA\_TMS\_DB5\_67min\_V3.lib

SI:34 Formula:C18H44O5Si4 CAS:154-17-6 MolWeight:452 RetIndex:1816

CompName:2-Deoxy-glucose-4TMS(2) ; (2S,4S,5S,6S)-6-(hydroxymethyl)oxane-2,4,5-triol

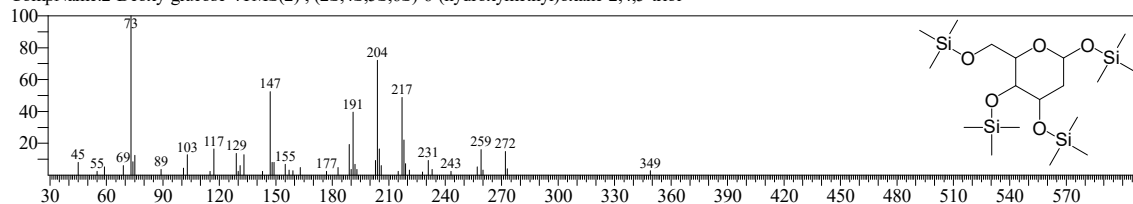



# TNAU

<< Target >>

Line#:7 R.Time:28.285(Scan#:4758) MassPeaks:282

RawMode:Averaged 28.280-28.290(4757-4759) BasePeak:207.05(1166)

BG Mode:Calc. from Peak Group 1 - Event 1 Q3 Scan

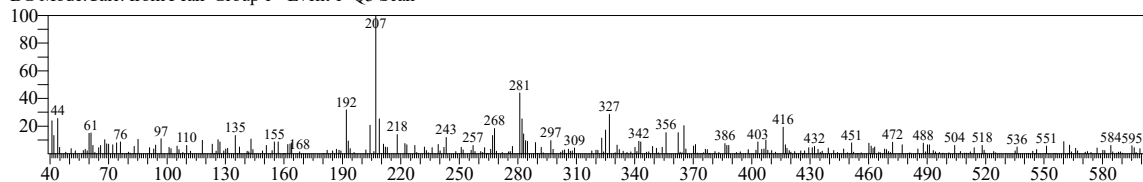

Hit#:1 Entry:211 Library:OA\_TMS\_DB5\_67min\_V3.lib

SI:30 Formula:C13H22O3Si2 CAS:99-96-7 MolWeight:282 RetIndex:1636

CompName:4-Hydroxybenzoic acid-2TMS ; 4-hydroxybenzoic acid

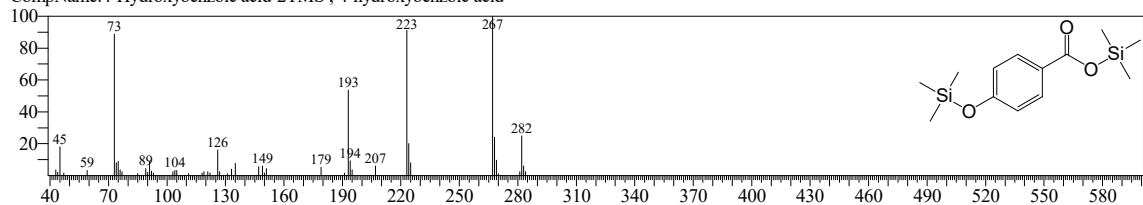

Hit#:2 Entry:179 Library:OA\_TMS\_DB5\_67min\_V3.lib

SI:29 Formula:C13H22O3Si2 CAS:99-06-9 MolWeight:282 RetIndex:1572

CompName:3-Hydroxybenzoic acid-2TMS ; 3-hydroxybenzoic acid

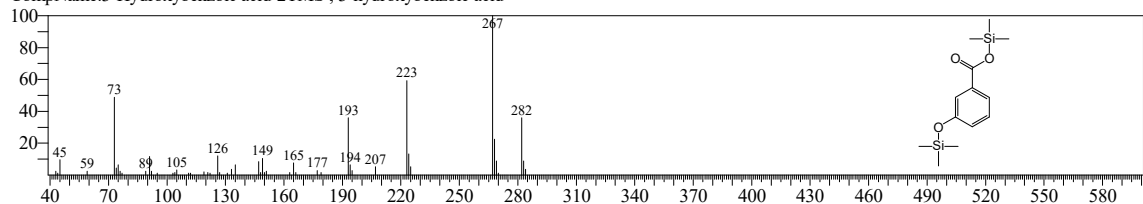

Hit#:3 Entry:291 Library:OA\_TMS\_DB5\_67min\_V3.lib

SI:25 Formula:C14H24O4Si2 CAS:121-34-6 MolWeight:312 RetIndex:1775

CompName:3-Methoxy-4-hydroxybenzoic acid-2TMS ; 4-hydroxy-3-methoxybenzoic acid

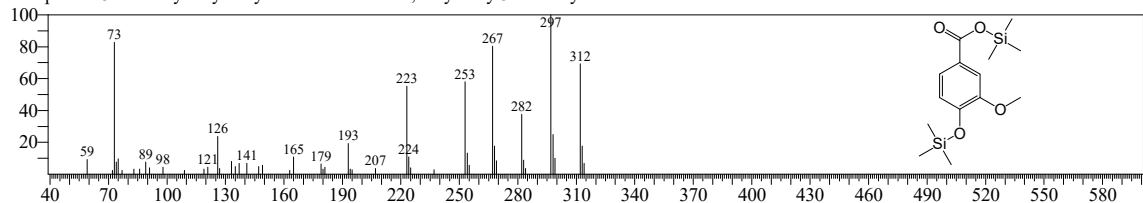

Hit#:4 Entry:359 Library:OA\_TMS\_DB5\_67min\_V3.lib

SI:24 Formula:C18H34O5Si3 CAS:55-10-7 MolWeight:414 RetIndex:1894

CompName:Vanilmandelic acid-3TMS ; 2-hydroxy-2-(4-hydroxy-3-methoxyphenyl)acetic acid

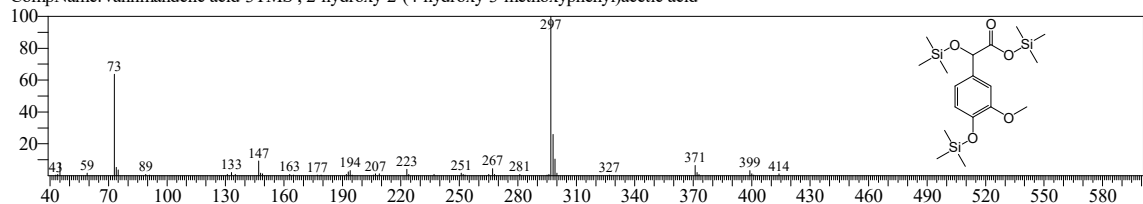

Hit#:5 Entry:413 Library:OA\_TMS\_DB5\_67min\_V3.lib

SI:21 Formula:C18H35NO3Si3 CAS:60-18-4 MolWeight:397 RetIndex:1958

CompName:Tyrosine-3TMS ; (2S)-2-amino-3-(4-hydroxyphenyl)propanoic acid

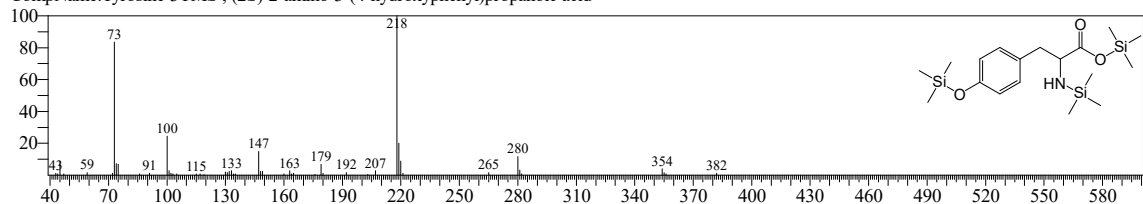

# TNAU

<< Target >>

Line#:8 R.Time:29.035(Scan#:4908) MassPeaks:318

RawMode:Averaged 29.030-29.040(4907-4909) BasePeak:190.95(844)

BG Mode:Calc. from Peak Group 1 - Event 1 Q3 Scan

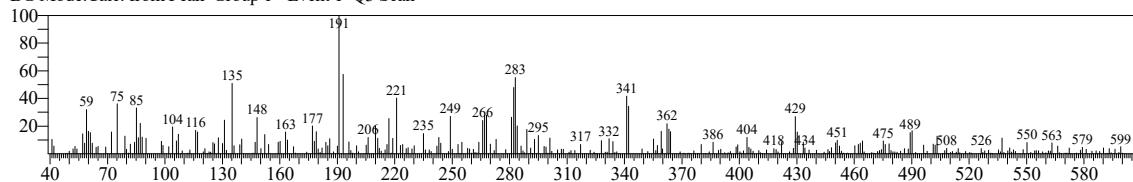

Hit#:1 Entry:211 Library:OA\_TMS\_DB5\_67min\_V3.lib

SI:32 Formula:C<sub>13</sub>H<sub>22</sub>O<sub>3</sub>Si<sub>2</sub> CAS:99-96-7 MolWeight:282 RetIndex:1636

CompName:4-Hydroxybenzoic acid-2TMS ; 4-hydroxybenzoic acid

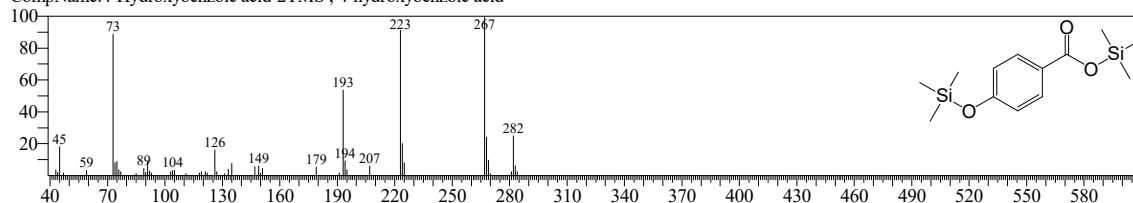

Hit#:2 Entry:341 Library:OA\_TMS\_DB5\_67min\_V3.lib

SI:31 Formula:C<sub>18</sub>H<sub>34</sub>O<sub>4</sub>Si<sub>3</sub> CAS:3247-75-4 MolWeight:398 RetIndex:1864

CompName:3-(3-Hydroxyphenyl)-3-hydroxypropionic acid-3TMS ; 3-hydroxy-3-(3-hydroxyphenyl)propanoic acid

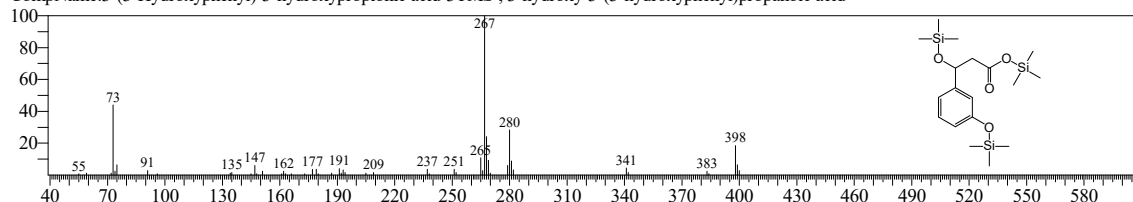

Hit#:3 Entry:179 Library:OA\_TMS\_DB5\_67min\_V3.lib

SI:30 Formula:C<sub>13</sub>H<sub>22</sub>O<sub>3</sub>Si<sub>2</sub> CAS:99-06-9 MolWeight:282 RetIndex:1572

CompName:3-Hydroxybenzoic acid-2TMS ; 3-hydroxybenzoic acid

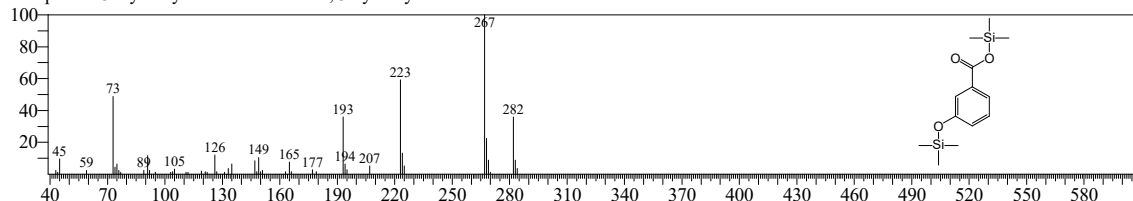

Hit#:4 Entry:150 Library:OA\_TMS\_DB5\_67min\_V3.lib

SI:28 Formula:C<sub>15</sub>H<sub>26</sub>O<sub>3</sub>Si<sub>2</sub> CAS:515-30-0 MolWeight:310 RetIndex:1517

CompName:2-Phenyllactic acid-2TMS ; 2-hydroxy-3-phenylpropanoic acid

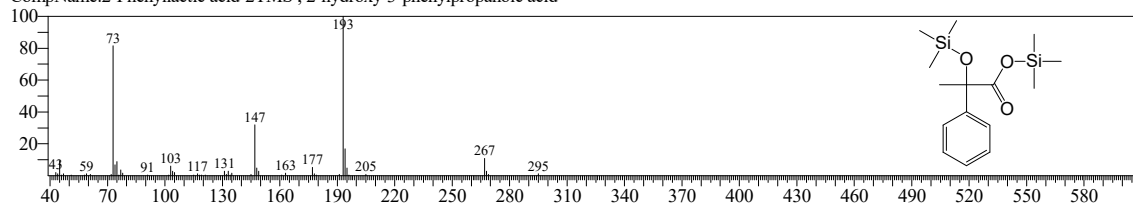

Hit#:5 Entry:203 Library:OA\_TMS\_DB5\_67min\_V3.lib

SI:26 Formula:C<sub>13</sub>H<sub>23</sub>NO<sub>2</sub>Si<sub>2</sub> CAS:118-92-3 MolWeight:281 RetIndex:1623

CompName:Anthranilic acid-2TMS ; 2-aminobenzoic acid

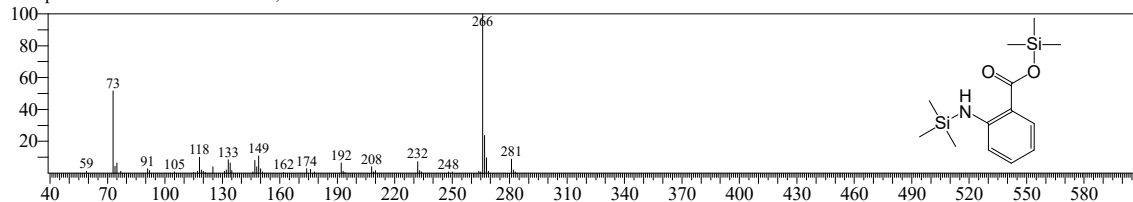

# TNAU

<< Target >>

Line#:9 R.Time:30.235(Scan#:5148) MassPeaks:289

RawMode:Averaged 30.230-30.240(5147-5149) BasePeak:207.05(1855)

BG Mode:Calc. from Peak Group 1 - Event 1 Q3 Scan

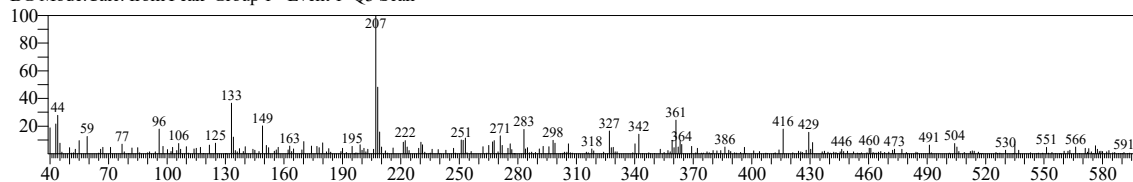

Hit#:1 Entry:79 Library:OA\_TMS\_DB5\_67min\_V3.lib

SI:28 Formula:C9H27O4PSi3 CAS:7664-38-2 MolWeight:314 RetIndex:1280

CompName:Phosphoric acid-3TMS ; phosphoric acid

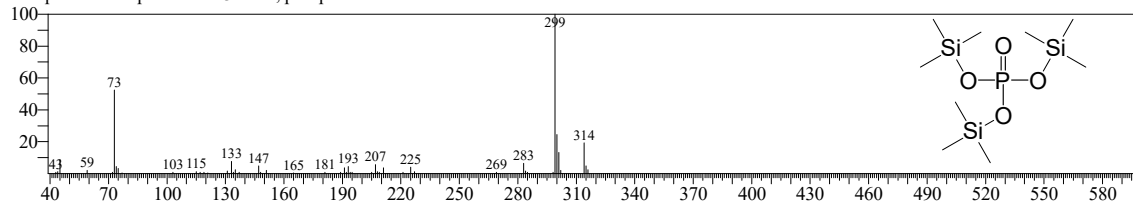

Hit#:2 Entry:179 Library:OA\_TMS\_DB5\_67min\_V3.lib

SI:24 Formula:C13H22O3Si2 CAS:99-06-9 MolWeight:282 RetIndex:1572

CompName:3-Hydroxybenzoic acid-2TMS ; 3-hydroxybenzoic acid

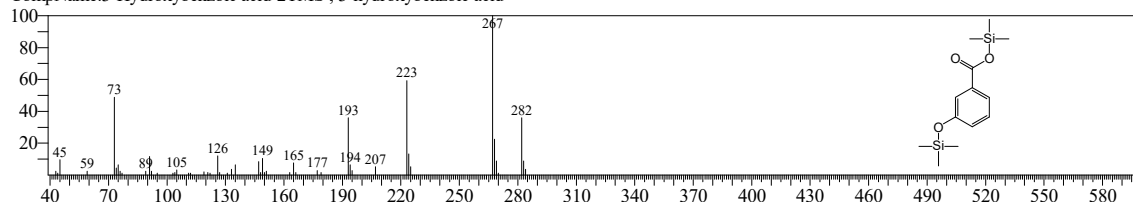

Hit#:3 Entry:211 Library:OA\_TMS\_DB5\_67min\_V3.lib

SI:23 Formula:C13H22O3Si2 CAS:99-96-7 MolWeight:282 RetIndex:1636

CompName:4-Hydroxybenzoic acid-2TMS ; 4-hydroxybenzoic acid

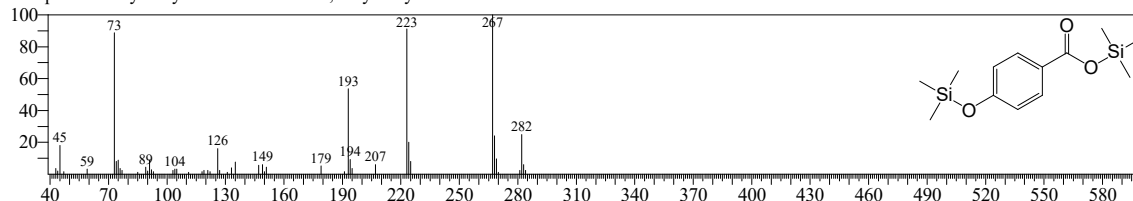

Hit#:4 Entry:189 Library:OA\_TMS\_DB5\_67min\_V3.lib

SI:19 Formula:C11H32NO4PSi3 CAS:1071-23-4 MolWeight:357 RetIndex:1587

CompName:O-Phosphoethanolamine-3TMS ; 2-aminoethyl dihydrogen phosphate

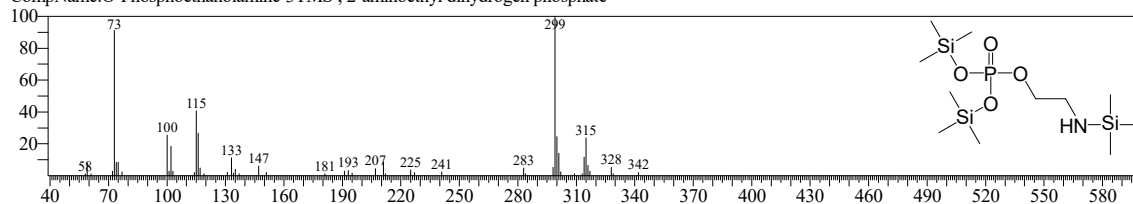

Hit#:5 Entry:277 Library:OA\_TMS\_DB5\_67min\_V3.lib

SI:19 Formula:C12H31NO5SSi3 CAS:498-40-8 MolWeight:385 RetIndex:1749

CompName:Cysteic acid-3TMS ; (2R)-2-amino-3-sulfopropanoic acid

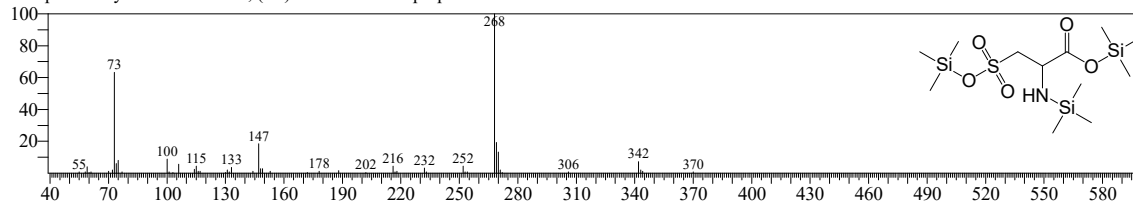

# TNAU

<< Target >>

Line#:10 R.Time:30.305(Scan#:5162) MassPeaks:295

RawMode:Averaged 30.300-30.310(5161-5163) BasePeak:207.05(1710)

BG Mode:Calc. from Peak Group 1 - Event 1 Q3 Scan

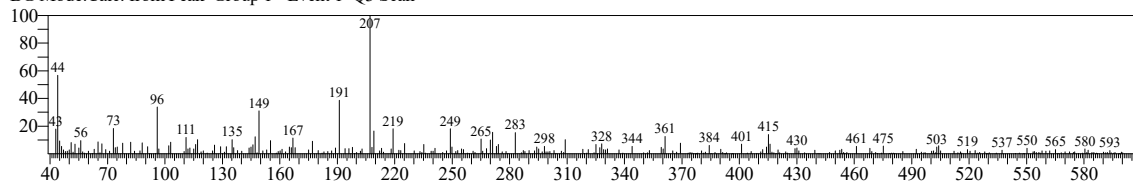

Hit#:1 Entry:77 Library:OA\_TMS\_DB5\_67min\_V3.lib

SI:35 Formula:C12H32O3Si3 CAS:56-81-5 MolWeight:308 RetIndex:1279

CompName:Glycerol-3TMS ; propane-1,2,3-triol

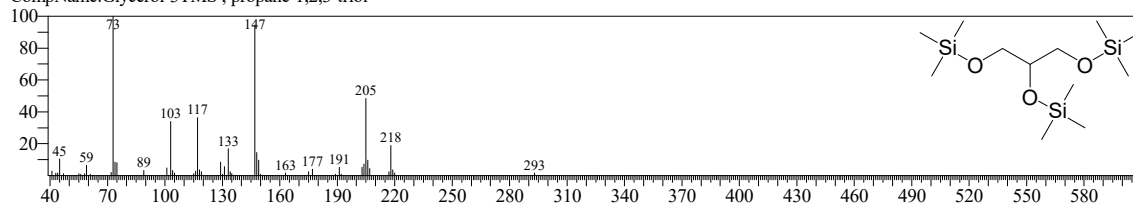

Hit#:2 Entry:8 Library:OA\_TMS\_DB5\_67min\_V3.lib

SI:35 Formula:C9H20O3Si2 CAS:79-33-4 MolWeight:234 RetIndex:1061

CompName:Lactic acid-2TMS ; (2S)-2-hydroxypropanoic acid

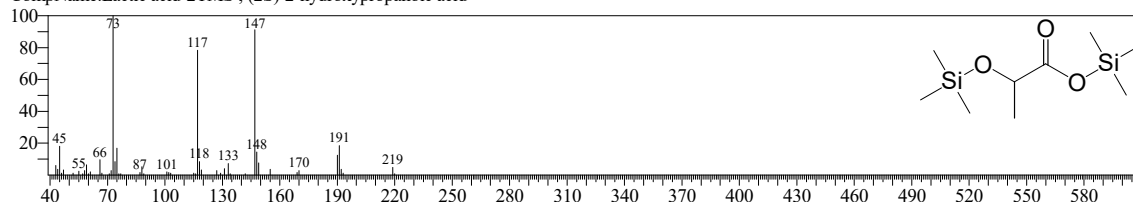

Hit#:3 Entry:13 Library:OA\_TMS\_DB5\_67min\_V3.lib

SI:34 Formula:C8H20O3Si2 CAS:79-14-1 MolWeight:220 RetIndex:1074

CompName:Glycolic acid-2TMS ; 2-hydroxyacetic acid

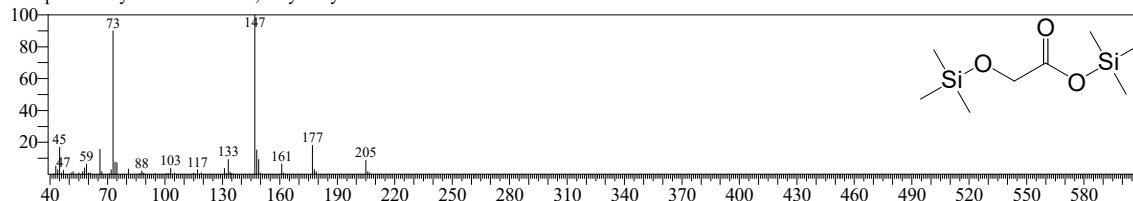

Hit#:4 Entry:528 Library:OA\_TMS\_DB5\_67min\_V3.lib

SI:34 Formula:C17H28Cl2N2O5Si2 CAS:56-75-7 MolWeight:466 RetIndex:2508

CompName:Chloramphenicol-2TMS ; 2,2-dichloro-N-[(1R,2R)-1,3-dihydroxy-1-(4-nitrophenyl)propan-2-yl]acetamide

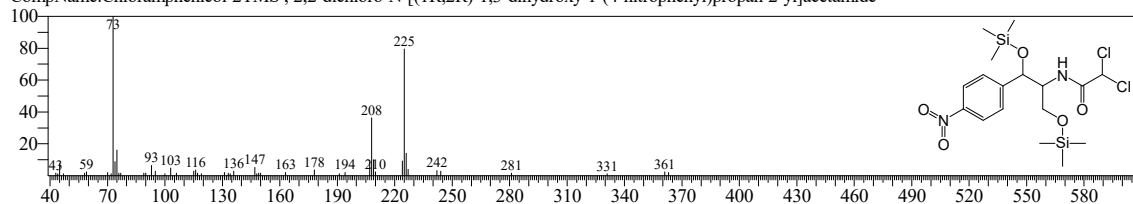

Hit#:5 Entry:461 Library:OA\_TMS\_DB5\_67min\_V3.lib

SI:33 Formula:C20H37NO4Si3 CAS:537-55-3 MolWeight:439 RetIndex:2119

CompName:N-Acetyltyrosine-3TMS ; (2S)-2-acetamido-3-(4-hydroxyphenyl)propanoic acid

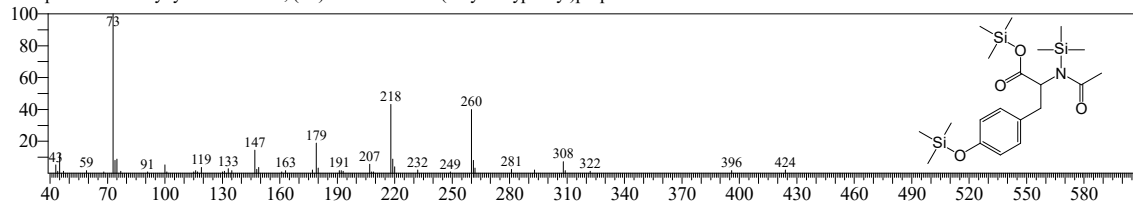

# TNAU

<< Target >>

Line#:11 R.Time:30.355(Scan#:5172) MassPeaks:280

RawMode:Averaged 30.350-30.360(5171-5173) BasePeak:207.05(1671)

BG Mode:Calc. from Peak Group 1 - Event 1 Q3 Scan

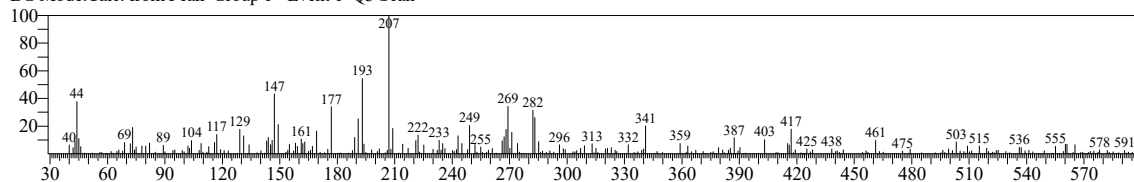

Hit#:1 Entry:179 Library:OA\_TMS\_DB5\_67min\_V3.lib

SI:42 Formula:C<sub>13</sub>H<sub>22</sub>O<sub>3</sub>Si<sub>2</sub> CAS:99-06-9 MolWeight:282 RetIndex:1572

CompName:3-Hydroxybenzoic acid-2TMS ; 3-hydroxybenzoic acid

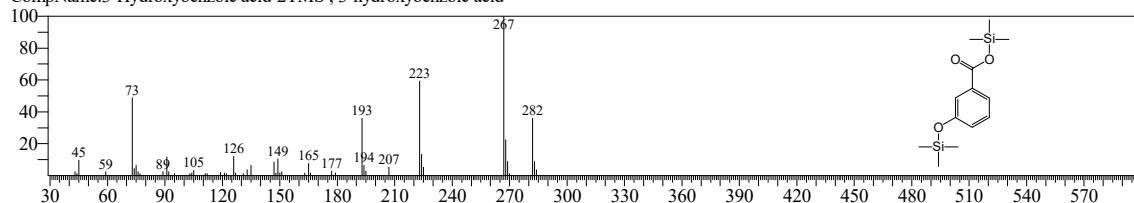

Hit#:2 Entry:211 Library:OA\_TMS\_DB5\_67min\_V3.lib

SI:40 Formula:C<sub>13</sub>H<sub>22</sub>O<sub>3</sub>Si<sub>2</sub> CAS:99-96-7 MolWeight:282 RetIndex:1636

CompName:4-Hydroxybenzoic acid-2TMS ; 4-hydroxybenzoic acid

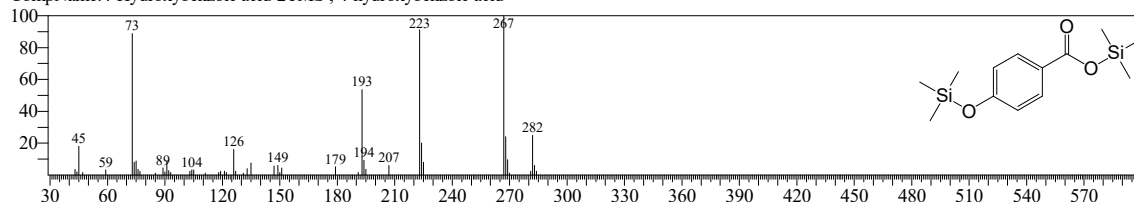

Hit#:3 Entry:150 Library:OA\_TMS\_DB5\_67min\_V3.lib

SI:39 Formula:C<sub>15</sub>H<sub>26</sub>O<sub>3</sub>Si<sub>2</sub> CAS:515-30-0 MolWeight:310 RetIndex:1517

CompName:2-Phenyllactic acid-2TMS ; 2-hydroxy-3-phenylpropanoic acid

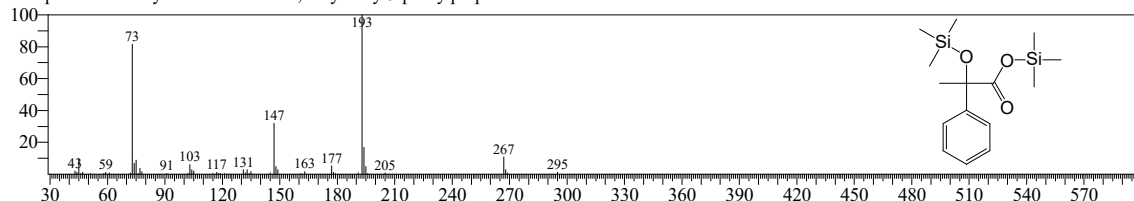

Hit#:4 Entry:194 Library:OA\_TMS\_DB5\_67min\_V3.lib

SI:38 Formula:C<sub>15</sub>H<sub>26</sub>O<sub>3</sub>Si<sub>2</sub> CAS:828-01-3 MolWeight:310 RetIndex:1599

CompName:3-Phenyllactic acid-2TMS ; 2-hydroxy-3-phenylpropanoic acid

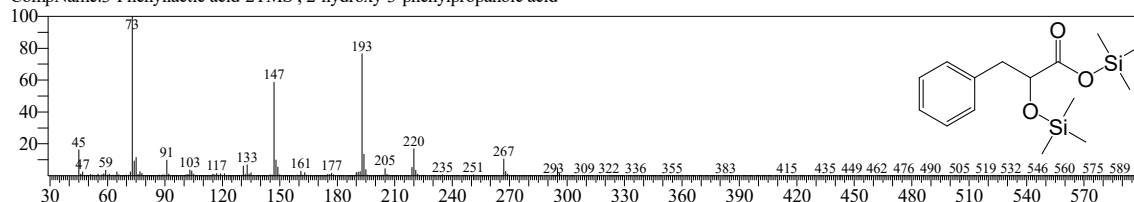

Hit#:5 Entry:328 Library:OA\_TMS\_DB5\_67min\_V3.lib

SI:36 Formula:C<sub>13</sub>H<sub>23</sub>NO<sub>2</sub>Si<sub>2</sub> CAS:150-13-0 MolWeight:281 RetIndex:1845

CompName:4-Aminobenzoic acid-2TMS ; 4-aminobenzoic acid

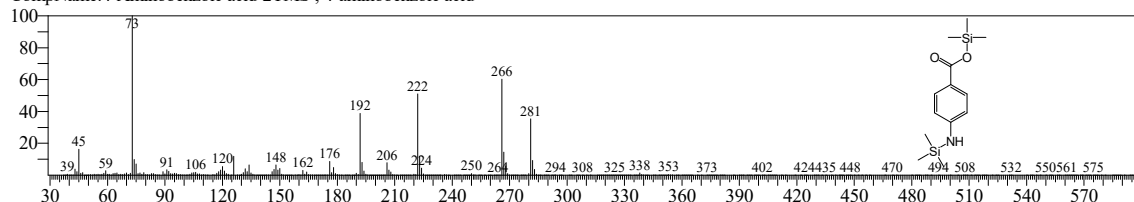

# TNAU

<< Target >>

Line#:12 R.Time:30.685(Scan#:5238) MassPeaks:330

RawMode:Averaged 30.680-30.690(5237-5239) BasePeak:117.10(584)

BG Mode:Calc. from Peak Group 1 - Event 1 Q3 Scan

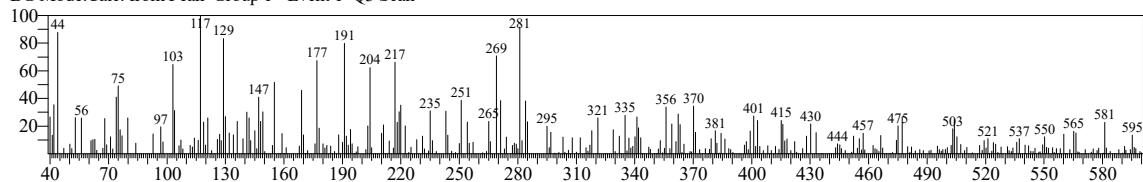

Hit#:1 Entry:555 Library:OA\_TMS\_DB5\_67min\_V3.lib

SI:34 Formula:C39H96O11Si9 CAS:585-86-4 MolWeight:992 RetIndex:2845

CompName:Lactitol-9TMS ; (2S,3R,4R,5R)-4-[(2S,3R,4S,5R,6R)-3,4,5-trihydroxy-6-(hydroxymethyl)oxan-2-yl]oxyhexane-1,2,3,5,6-pentol

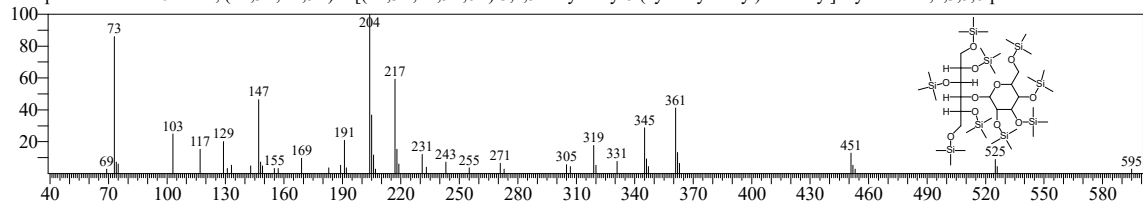

Hit#:2 Entry:345 Library:OA\_TMS\_DB5\_67min\_V3.lib

SI:34 Formula:C21H52O6Si5 CAS:59-23-4 MolWeight:540 RetIndex:1868

CompName:Galactose-5TMS(2) ; (3R,4S,5R,6R)-6-(hydroxymethyl)oxane-2,3,4,5-tetrol

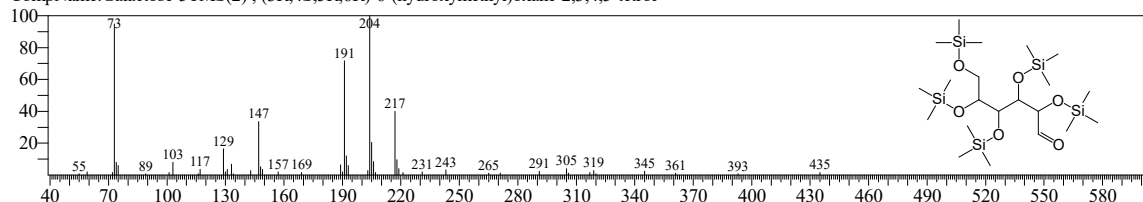

Hit#:3 Entry:349 Library:OA\_TMS\_DB5\_67min\_V3.lib

SI:33 Formula:C21H52O6Si5 CAS:2595-97-3 MolWeight:540 RetIndex:1874

CompName:Allose-5TMS ; (2R,3R,4R,5R)-2,3,4,5,6-pentahydroxyhexanal

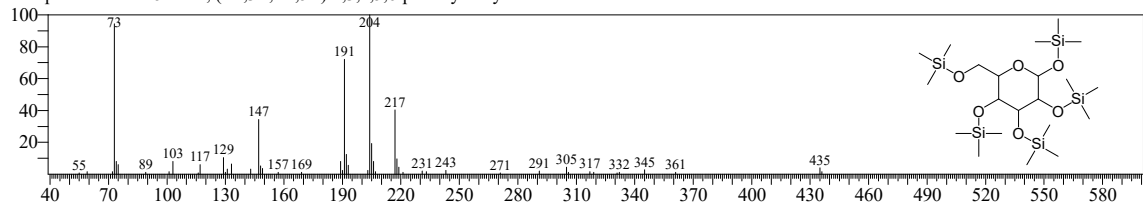

Hit#:4 Entry:227 Library:OA\_TMS\_DB5\_67min\_V3.lib

SI:31 Formula:C17H42O5Si4 CAS:50-69-1 MolWeight:438 RetIndex:1657

CompName:Ribose-4TMS(1) ; (3R,4S,5R)-5-(hydroxymethyl)oxolane-2,3,4-triol

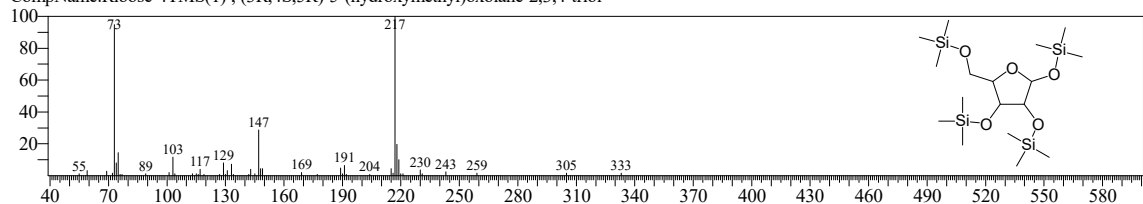

Hit#:5 Entry:348 Library:OA\_TMS\_DB5\_67min\_V3.lib

SI:31 Formula:C21H52O6Si5 CAS:3458-28-4 MolWeight:540 RetIndex:1872

CompName:Mannose-5TMS(2) ; (3S,4S,5S,6R)-6-(hydroxymethyl)oxane-2,3,4,5-tetrol

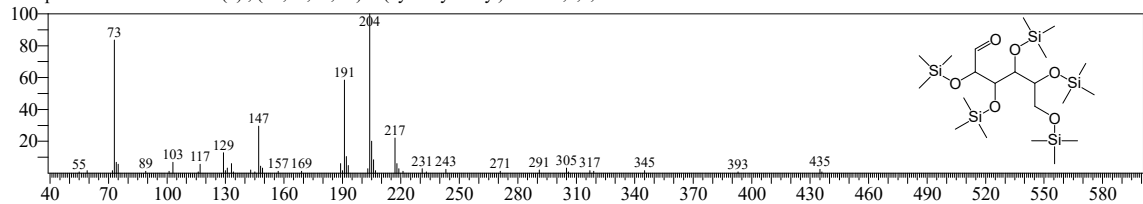

# TNAU

<< Target >>

Line#:13 R.Time:30.765(Scan#:5254) MassPeaks:306

RawMode:Averaged 30.760-30.770(5253-5255) BasePeak:281.05(1120)

BG Mode:Calc. from Peak Group 1 - Event 1 Q3 Scan

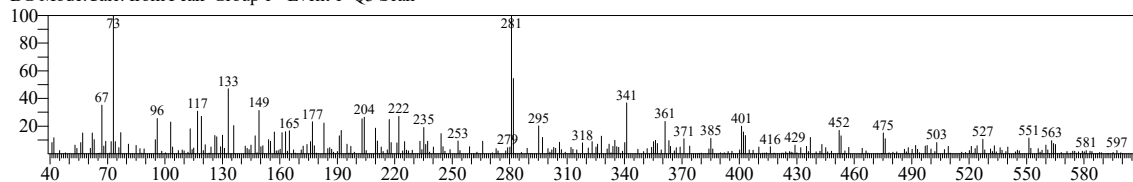

Hit#:1 Entry:306 Library:OA\_TMS\_DB5\_67min\_V3.lib

SI:38 Formula:C18H44O5Si4 CAS:154-17-6 MolWeight:452 RetIndex:1816

CompName:2-Deoxy-glucose-4TMS(2) ; (2S,4S,5S,6S)-6-(hydroxymethyl)oxane-2,4,5-triol

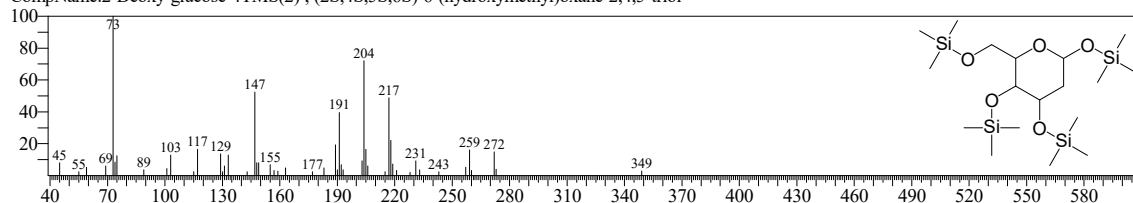

Hit#:2 Entry:561 Library:OA\_TMS\_DB5\_67min\_V3.lib

SI:37 Formula:C37H89NO11Si8 CAS:499-40-1 MolWeight:947 RetIndex:2983

CompName:Isomaltose-meto-8TMS(2) ; (3R,4S,5S,6R)-6-[[[(2S,3R,4S,5S,6R)-3,4,5-trihydroxy-6-(hydroxymethyl)oxan-2-yl]oxymethyl]oxane-2,3,

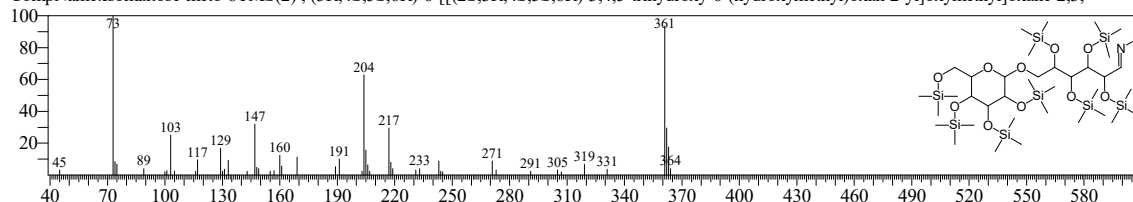

Hit#:3 Entry:351 Library:OA\_TMS\_DB5\_67min\_V3.lib

SI:37 Formula:C18H44O5Si4 CAS:154-58-5 MolWeight:452 RetIndex:1876

CompName:1,5-Anhydro-glucitol-4TMS ; (2R,3S,4R,5S)-2-(hydroxymethyl)oxane-3,4,5-triol

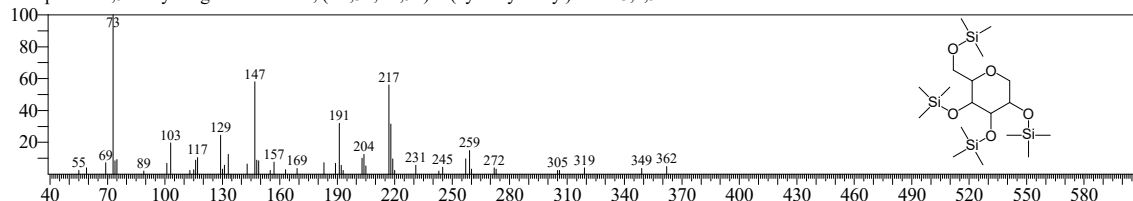

Hit#:4 Entry:264 Library:OA\_TMS\_DB5\_67min\_V3.lib

SI:36 Formula:C15H34O5Si3 CAS:498-07-7 MolWeight:378 RetIndex:1725

CompName:1,6-Anhydroglucose-3TMS ; (1R,2S,3S,4R,5R)-6,8-dioxabicyclo[3.2.1]octane-2,3,4-triol

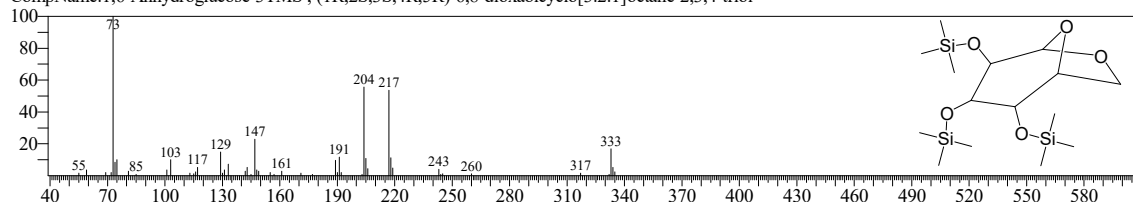

Hit#:5 Entry:349 Library:OA\_TMS\_DB5\_67min\_V3.lib

SI:36 Formula:C21H52O6Si5 CAS:2595-97-3 MolWeight:540 RetIndex:1874

CompName:Allose-5TMS ; (2R,3R,4R,5R)-2,3,4,5,6-pentahydroxyhexanal

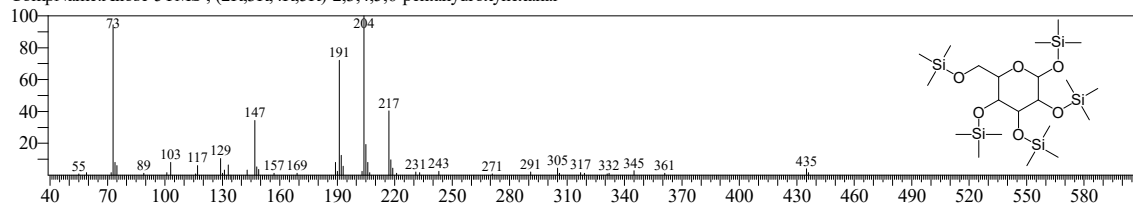

# TNAU

<< Target >>

Line#:14 R.Time:30.845(Scan#:5270) MassPeaks:283

RawMode:Averaged 30.840-30.850(5269-5271) BasePeak:281.10(1187)

BG Mode:Calc. from Peak Group 1 - Event 1 Q3 Scan

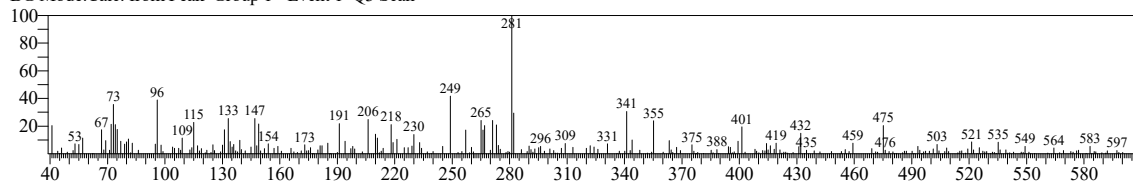

Hit#:1 Entry:74 Library:OA\_TMS\_DB5\_67min\_V3.lib

SI:38 Formula:C<sub>12</sub>H<sub>28</sub>O<sub>3</sub>Si<sub>2</sub> CAS:28892-73-1 MolWeight:276 RetIndex:1277

CompName:2-Methyl-3-hydroxyvaleric acid-2TMS ; 3-hydroxy-2-methylpentanoic acid

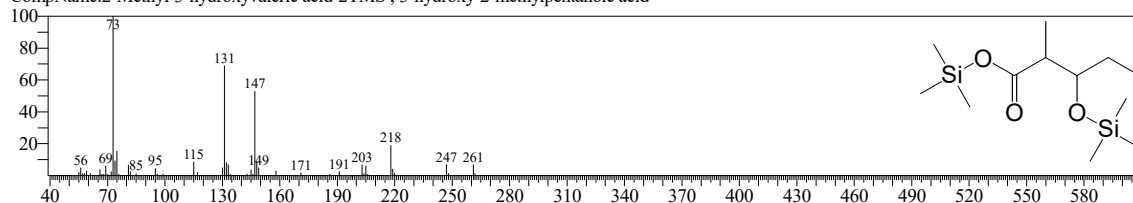

Hit#:2 Entry:203 Library:OA\_TMS\_DB5\_67min\_V3.lib

SI:37 Formula:C<sub>13</sub>H<sub>23</sub>NO<sub>2</sub>Si<sub>2</sub> CAS:118-92-3 MolWeight:281 RetIndex:1623

CompName:Anthranilic acid-2TMS ; 2-aminobenzoic acid

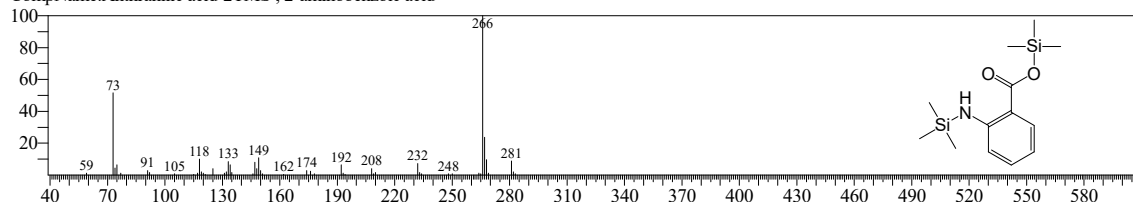

Hit#:3 Entry:402 Library:OA\_TMS\_DB5\_67min\_V3.lib

SI:35 Formula:C<sub>20</sub>H<sub>42</sub>O<sub>4</sub>Si<sub>4</sub> CAS:775-01-9 MolWeight:458 RetIndex:1942

CompName:3,4-Dihydroxymandelic acid-4TMS ; 2-(3,4-dihydroxyphenyl)-2-hydroxyacetic acid

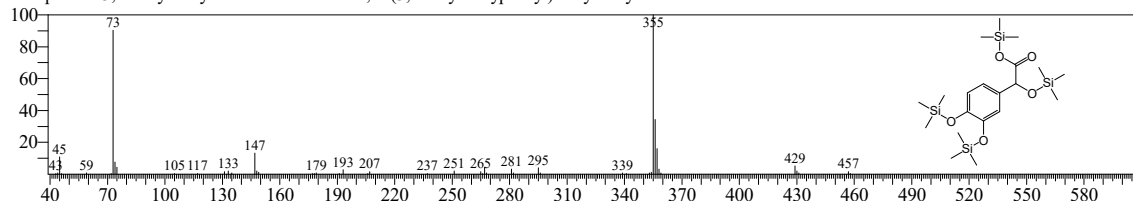

Hit#:4 Entry:310 Library:OA\_TMS\_DB5\_67min\_V3.lib

SI:35 Formula:C<sub>11</sub>H<sub>20</sub>N<sub>4</sub>O<sub>3</sub>Si<sub>2</sub> CAS:68-94-0 MolWeight:280 RetIndex:1822

CompName:Hypoxanthine-2TMS ; 3,7-dihydropurin-6-one

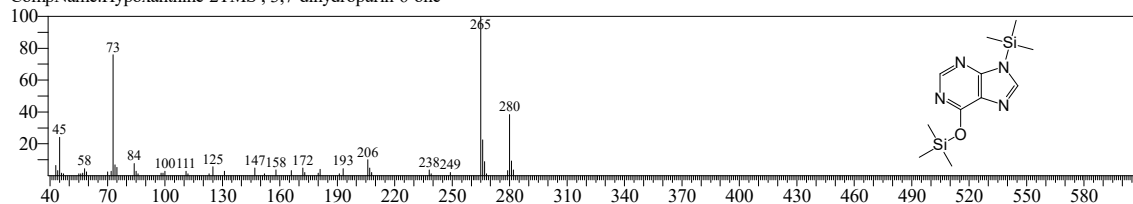

Hit#:5 Entry:413 Library:OA\_TMS\_DB5\_67min\_V3.lib

SI:35 Formula:C<sub>18</sub>H<sub>35</sub>NO<sub>3</sub>Si<sub>3</sub> CAS:60-18-4 MolWeight:397 RetIndex:1958

CompName:Tyrosine-3TMS ; (2S)-2-amino-3-(4-hydroxyphenyl)propanoic acid

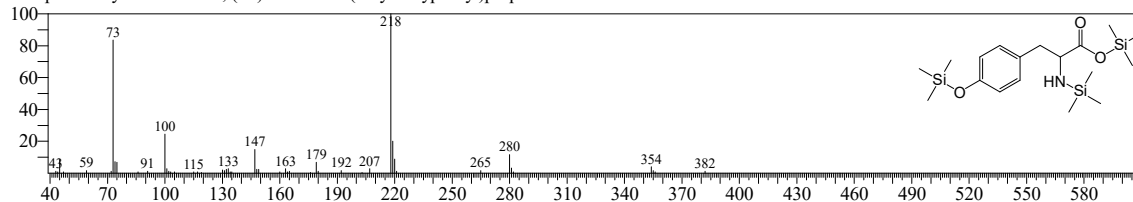



# TNAU

<< Target >>

Line#:15 R.Time:31.115(Scan#:5324) MassPeaks:275

RawMode:Averaged 31.110-31.120(5323-5325) BasePeak:73.00(1233)

BG Mode:Calc. from Peak Group 1 - Event 1 Q3 Scan

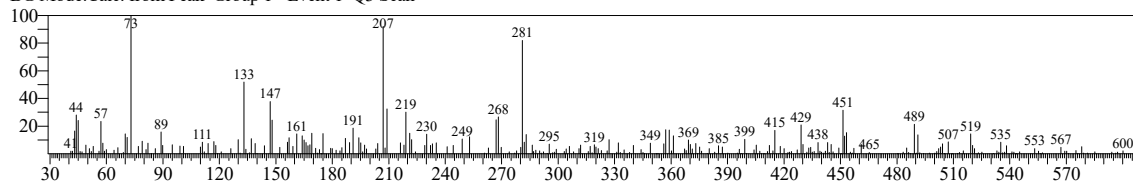

Hit#:1 Entry:328 Library:OA\_TMS\_DB5\_67min\_V3.lib

SI:40 Formula:C13H23NO2Si2 CAS:150-13-0 MolWeight:281 RetIndex:1845

CompName:4-Aminobenzoic acid-2TMS ; 4-aminobenzoic acid

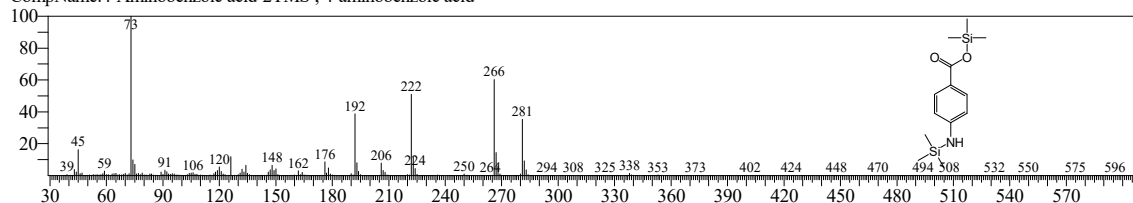

Hit#:2 Entry:184 Library:OA\_TMS\_DB5\_67min\_V3.lib

SI:39 Formula:C14H24O3Si2 CAS:614-75-5 MolWeight:296 RetIndex:1579

CompName:2-Hydroxyphenylacetic acid-2TMS ; 2-(2-hydroxyphenyl)acetic acid

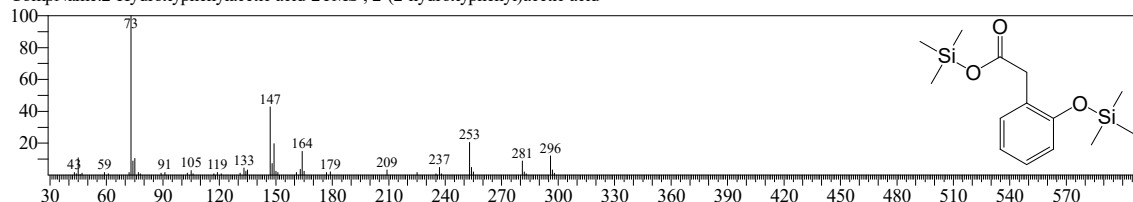

Hit#:3 Entry:438 Library:OA\_TMS\_DB5\_67min\_V3.lib

SI:39 Formula:C12H22N2O2Si2 CAS:104-98-3 MolWeight:282 RetIndex:2014

CompName:Urocanic acid-2TMS ; (E)-3-(1H-imidazol-5-yl)prop-2-enoic acid

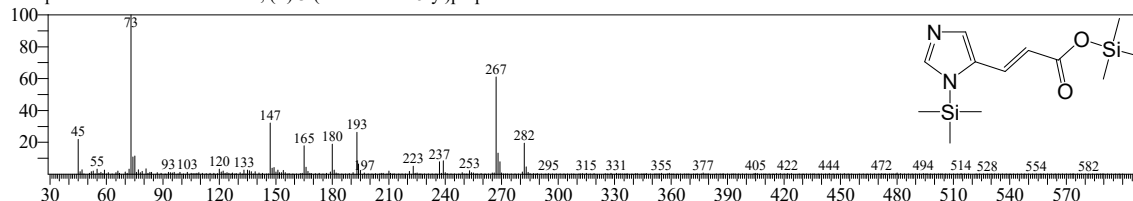

Hit#:4 Entry:200 Library:OA\_TMS\_DB5\_67min\_V3.lib

SI:39 Formula:C14H24O3Si2 CAS:621-37-4 MolWeight:296 RetIndex:1617

CompName:3-Hydroxyphenylacetic acid-2TMS ; 2-(3-hydroxyphenyl)acetic acid

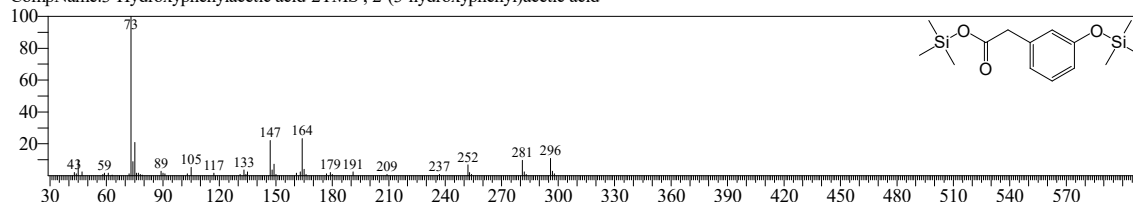

Hit#:5 Entry:548 Library:OA\_TMS\_DB5\_67min\_V3.lib

SI:38 Formula:C17H31N5O3SSi2 CAS:2457-80-9 MolWeight:441 RetIndex:2787

CompName:5'-Methylthioadenosine-2TMS ; (2R,3R,4S,5S)-2-(6-aminopurin-9-yl)-5-(methylsulfanylmethyl)oxolane-3,4-diol

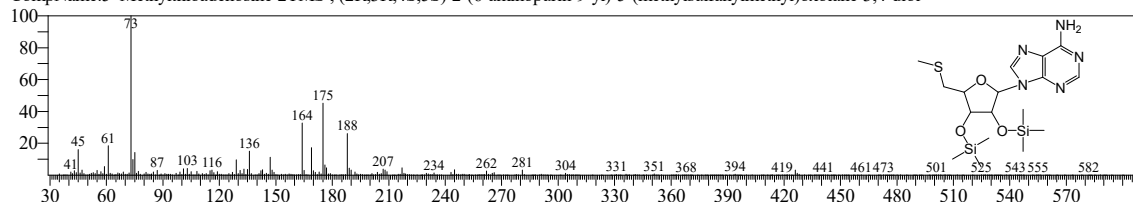

# TNAU

<< Target >>

Line#:16 R.Time:31.285(Scan#:5358) MassPeaks:313

RawMode:Averaged 31.280-31.290(5357-5359) BasePeak:207.05(1756)

BG Mode:Calc. from Peak Group 1 - Event 1 Q3 Scan

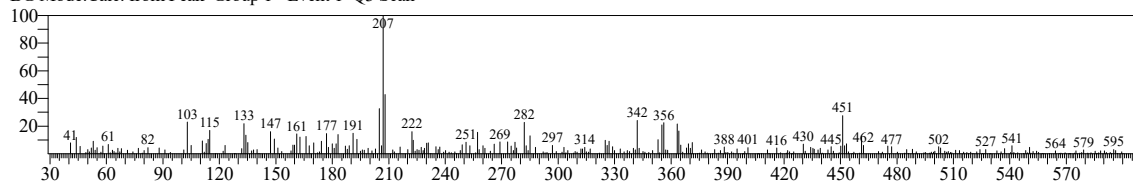

Hit#:1 Entry:539 Library:OA\_TMS\_DB5\_67min\_V3.lib

SI:28 Formula:C27H60O3Si2 CAS:544-62-7 MolWeight:488 RetIndex:2684

CompName:Batyl alcohol-2TMS ; 3-octadecoxypropane-1,2-diol

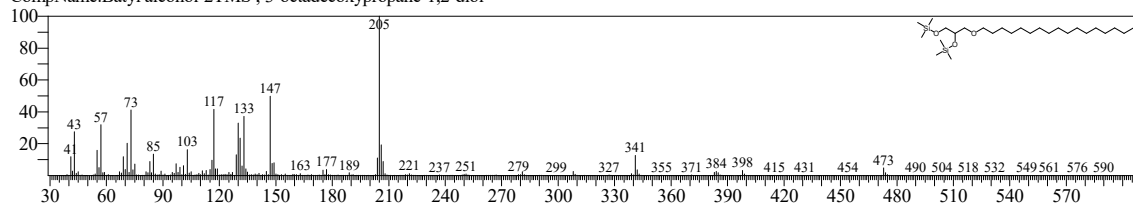

Hit#:2 Entry:315 Library:OA\_TMS\_DB5\_67min\_V3.lib

SI:27 Formula:C16H30O4Si3 CAS:99-50-3 MolWeight:370 RetIndex:1833

CompName:Protocatechuic acid-3TMS ; 3,4-dihydroxybenzoic acid

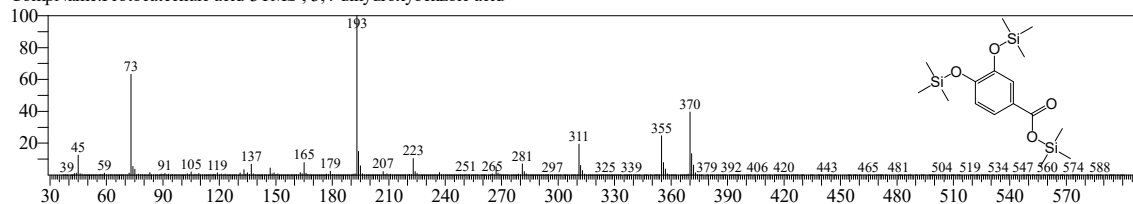

Hit#:3 Entry:402 Library:OA\_TMS\_DB5\_67min\_V3.lib

SI:27 Formula:C20H42O4Si4 CAS:775-01-9 MolWeight:458 RetIndex:1942

CompName:3,4-Dihydroxymandelic acid-4TMS ; 2-(3,4-dihydroxyphenyl)-2-hydroxyacetic acid

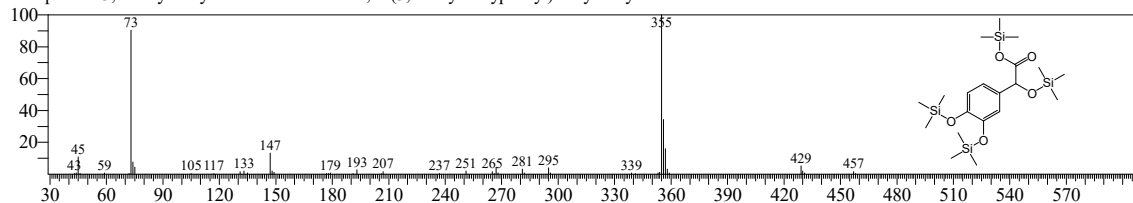

Hit#:4 Entry:13 Library:OA\_TMS\_DB5\_67min\_V3.lib

SI:26 Formula:C8H20O3Si2 CAS:79-14-1 MolWeight:220 RetIndex:1074

CompName:Glycolic acid-2TMS ; 2-hydroxyacetic acid

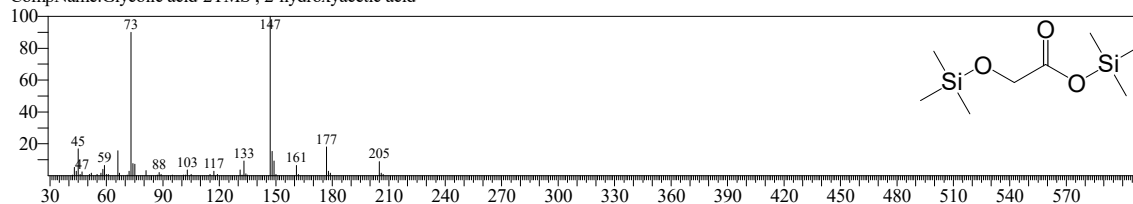

Hit#:5 Entry:171 Library:OA\_TMS\_DB5\_67min\_V3.lib

SI:24 Formula:C12H16O2Si CAS:140-10-3 MolWeight:220 RetIndex:1552

CompName:Cinnamic acid-TMS ; (E)-3-phenylprop-2-enoic acid

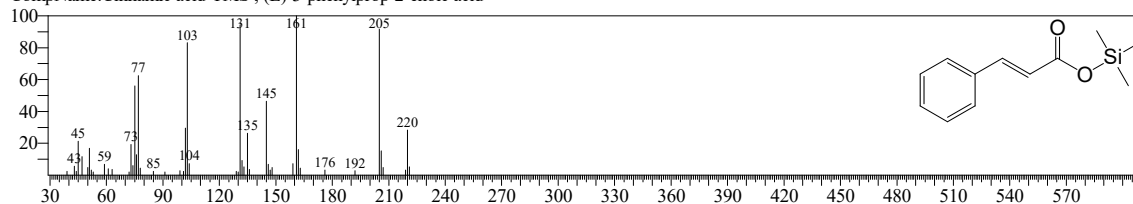

# TNAU

<< Target >>

Line#:17 R.Time:31.560(Scan#:5413) MassPeaks:325

RawMode:Averaged 31.555-31.565(5412-5414) BasePeak:207.05(820)

BG Mode:Calc. from Peak Group 1 - Event 1 Q3 Scan

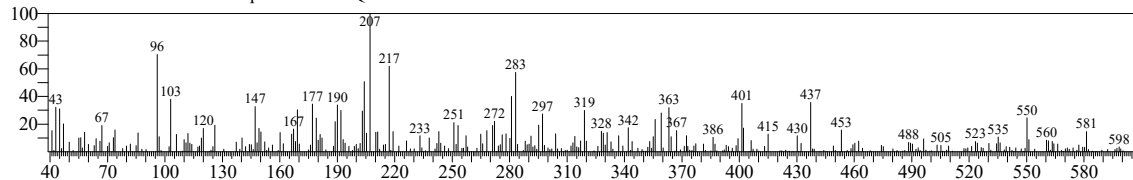

Hit#:1 Entry:555 Library:OA\_TMS\_DB5\_67min\_V3.lib

SI:32 Formula:C39H96O11Si9 CAS:585-86-4 MolWeight:992 RetIndex:2845

CompName:Lactitol-9TMS ; (2S,3R,4R,5R)-4-[(2S,3R,4S,5R,6R)-3,4,5-trihydroxy-6-(hydroxymethyl)oxan-2-yl]oxyhexane-1,2,3,5,6-pentol

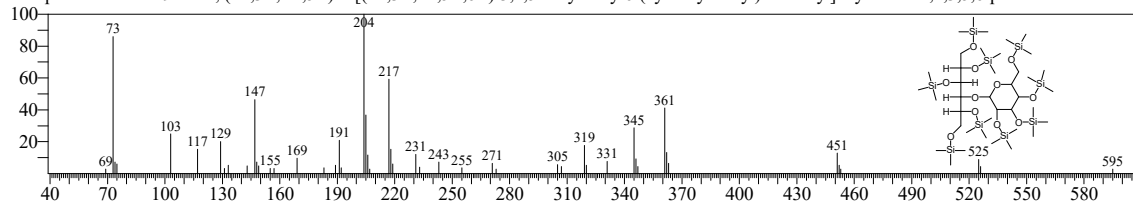

Hit#:2 Entry:276 Library:OA\_TMS\_DB5\_67min\_V3.lib

SI:30 Formula:C18H44O5Si4 CAS:154-17-6 MolWeight:452 RetIndex:1745

CompName:2-Deoxy-glucose-4TMS(1) ; (2S,4S,5S,6S)-6-(hydroxymethyl)oxane-2,4,5-triol

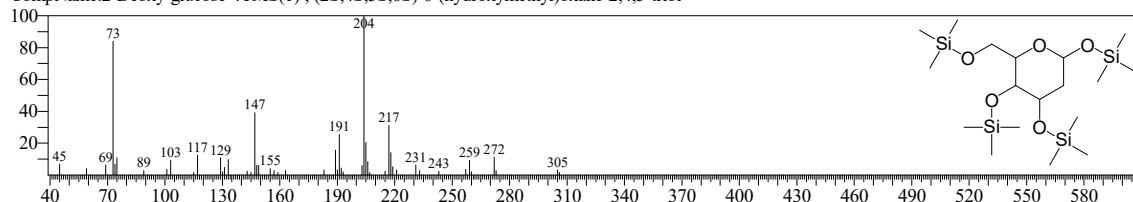

Hit#:3 Entry:349 Library:OA\_TMS\_DB5\_67min\_V3.lib

SI:30 Formula:C21H52O6Si5 CAS:2595-97-3 MolWeight:540 RetIndex:1874

CompName:Allose-5TMS ; (2R,3R,4R,5R)-2,3,4,5,6-pentahydroxyhexanal

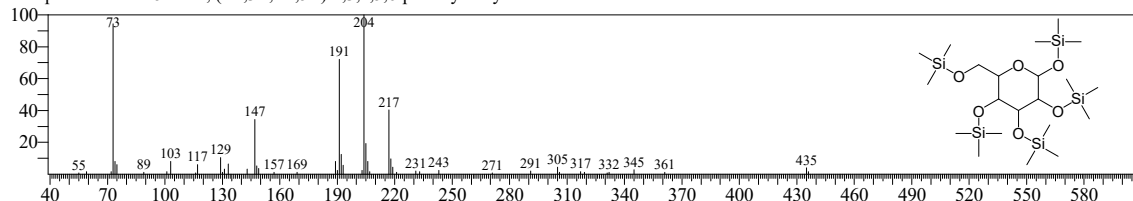

Hit#:4 Entry:345 Library:OA\_TMS\_DB5\_67min\_V3.lib

SI:30 Formula:C21H52O6Si5 CAS:59-23-4 MolWeight:540 RetIndex:1868

CompName:Galactose-5TMS(2) ; (3R,4S,5R,6R)-6-(hydroxymethyl)oxane-2,3,4,5-tetrol

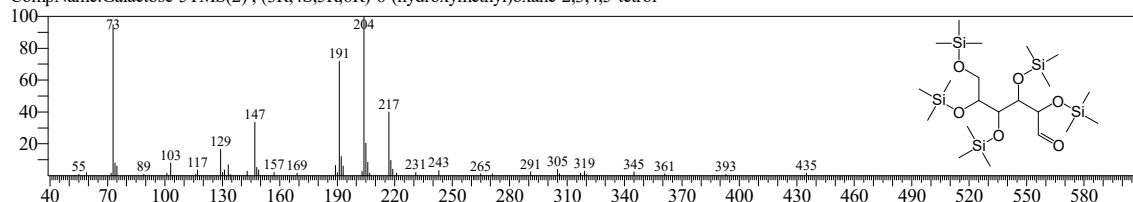

Hit#:5 Entry:348 Library:OA\_TMS\_DB5\_67min\_V3.lib

SI:29 Formula:C21H52O6Si5 CAS:3458-28-4 MolWeight:540 RetIndex:1872

CompName:Mannose-5TMS(2) ; (3S,4S,5S,6R)-6-(hydroxymethyl)oxane-2,3,4,5-tetrol

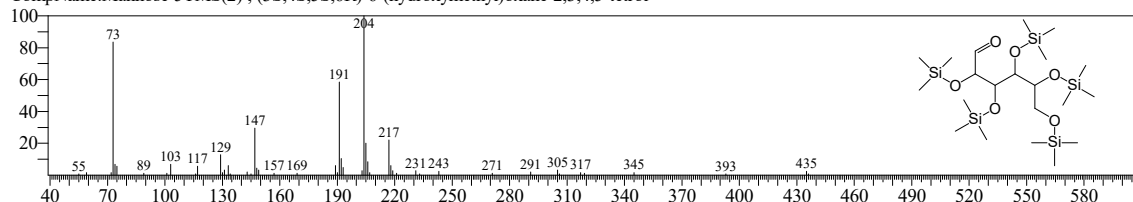

# TNAU

<< Target >>

Line#:18 R.Time:31.885(Scan#:5478) MassPeaks:300

RawMode:Averaged 31.880-31.890(5477-5479) BasePeak:207.05(2682)

BG Mode:Calc. from Peak Group 1 - Event 1 Q3 Scan

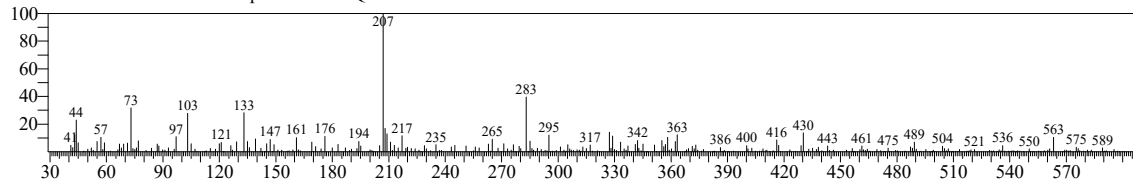

Hit#:1 Entry:548 Library:OA\_TMS\_DB5\_67min\_V3.lib

SI:36 Formula:C17H31N5O3SSi2 CAS:2457-80-9 MolWeight:441 RetIndex:2787

CompName:5'-Methylthioadenosine-2TMS ; (2R,3R,4S,5S)-2-(6-aminopurin-9-yl)-5-(methylsulfanylmethyl)oxolane-3,4-diol

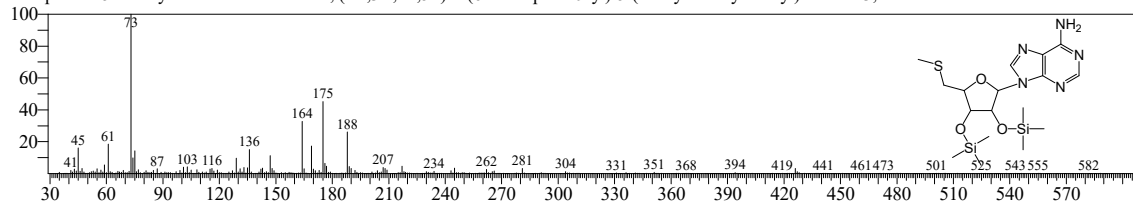

Hit#:2 Entry:13 Library:OA\_TMS\_DB5\_67min\_V3.lib

SI:36 Formula:C8H20O3Si2 CAS:79-14-1 MolWeight:220 RetIndex:1074

CompName:Glycolic acid-2TMS ; 2-hydroxyacetic acid

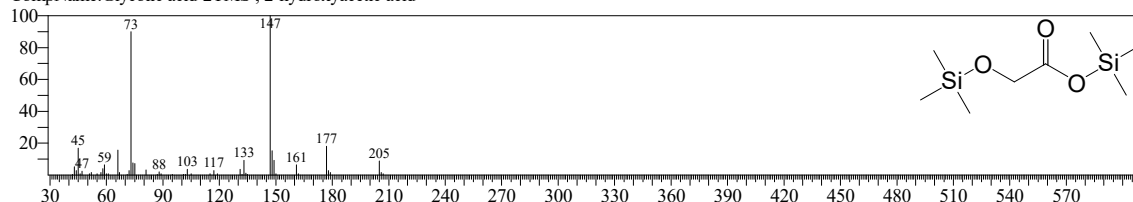

Hit#:3 Entry:77 Library:OA\_TMS\_DB5\_67min\_V3.lib

SI:35 Formula:C12H32O3Si3 CAS:56-81-5 MolWeight:308 RetIndex:1279

CompName:Glycerol-3TMS ; propane-1,2,3-triol

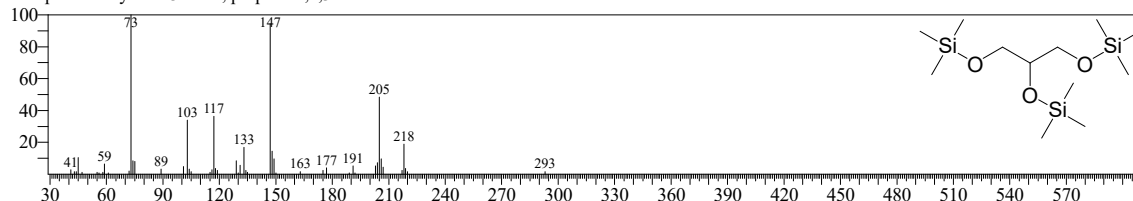

Hit#:4 Entry:402 Library:OA\_TMS\_DB5\_67min\_V3.lib

SI:34 Formula:C20H42O4Si4 CAS:775-01-9 MolWeight:458 RetIndex:1942

CompName:3,4-Dihydroxymandelic acid-4TMS ; 2-(3,4-dihydroxyphenyl)-2-hydroxyacetic acid

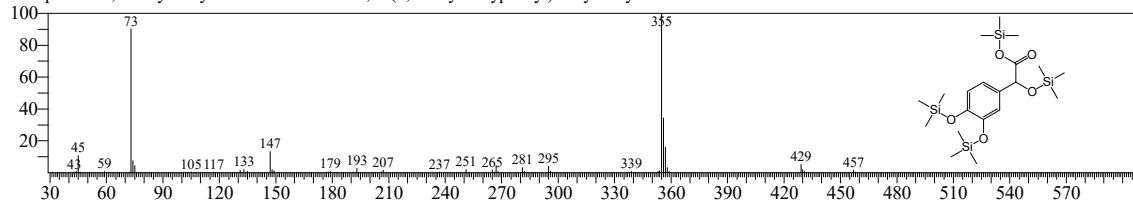

Hit#:5 Entry:156 Library:OA\_TMS\_DB5\_67min\_V3.lib

SI:34 Formula:C12H24O4Si2 CAS:4440-68-0 MolWeight:288 RetIndex:1522

CompName:2-Hexenedioic acid-2TMS ; hex-2-enedioic acid

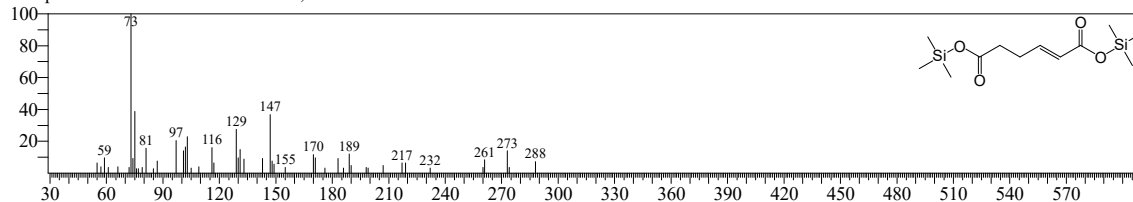

# TNAU

<< Target >>

Line#:19 R.Time:32.365(Scan#:5574) MassPeaks:293

RawMode:Averaged 32.360-32.370(5573-5575) BasePeak:207.05(1745)

BG Mode:Calc. from Peak Group 1 - Event 1 Q3 Scan

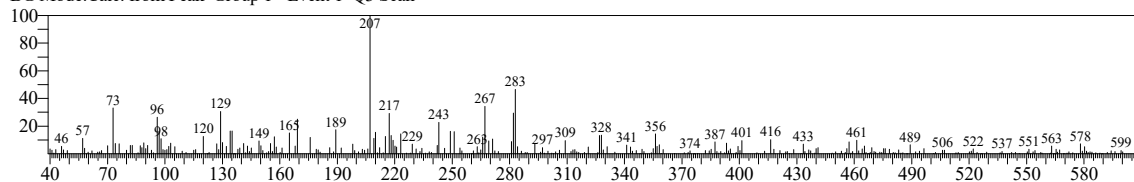

Hit#:1 Entry:179 Library:OA\_TMS\_DB5\_67min\_V3.lib

SI:37 Formula:C13H22O3Si2 CAS:99-06-9 MolWeight:282 RetIndex:1572

CompName:3-Hydroxybenzoic acid-2TMS ; 3-hydroxybenzoic acid

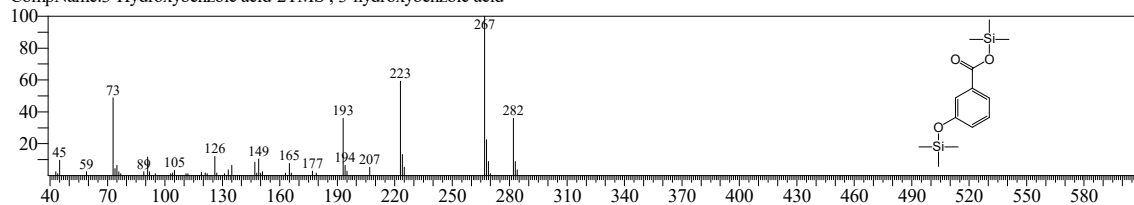

Hit#:2 Entry:211 Library:OA\_TMS\_DB5\_67min\_V3.lib

SI:36 Formula:C13H22O3Si2 CAS:99-96-7 MolWeight:282 RetIndex:1636

CompName:4-Hydroxybenzoic acid-2TMS ; 4-hydroxybenzoic acid

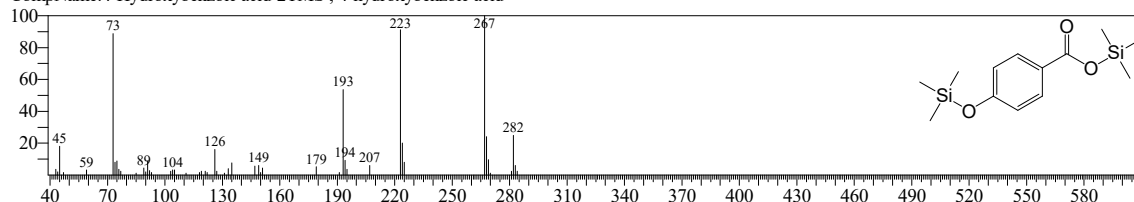

Hit#:3 Entry:535 Library:OA\_TMS\_DB5\_67min\_V3.lib

SI:36 Formula:C22H44N4O5Si4 CAS:58-63-9 MolWeight:556 RetIndex:2605

CompName:Inosine-4TMS ; 9-[(2R,3R,4S,5R)-3,4-dihydroxy-5-(hydroxymethyl)oxolan-2-yl]-3H-purin-6-one

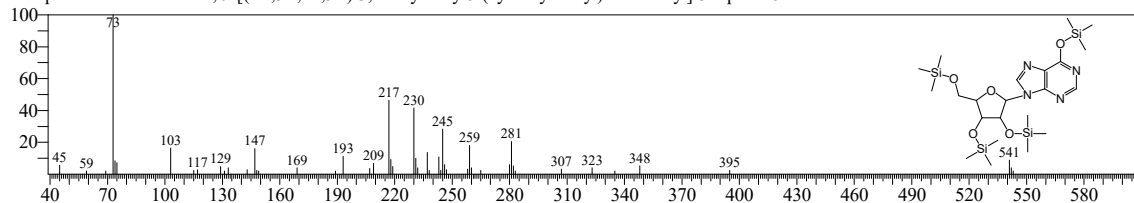

Hit#:4 Entry:268 Library:OA\_TMS\_DB5\_67min\_V3.lib

SI:34 Formula:C20H52O5Si5 CAS:87-99-0 MolWeight:512 RetIndex:1732

CompName:Xylitol-5TMS ; (2S,4R)-pentane-1,2,3,4,5-pentol

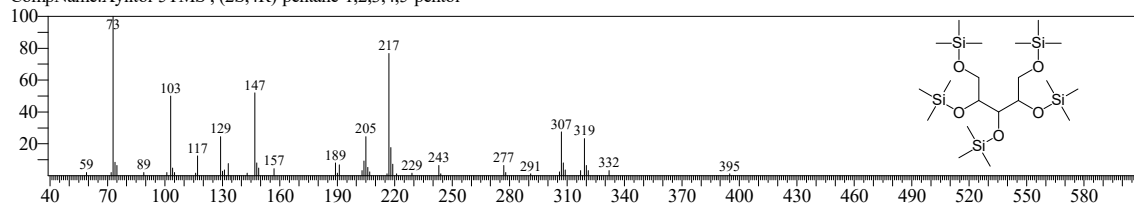

Hit#:5 Entry:279 Library:OA\_TMS\_DB5\_67min\_V3.lib

SI:34 Formula:C20H52O5Si5 CAS:488-81-3 MolWeight:512 RetIndex:1750

CompName:Ribitol-5TMS ; pentane-1,2,3,4,5-pentol

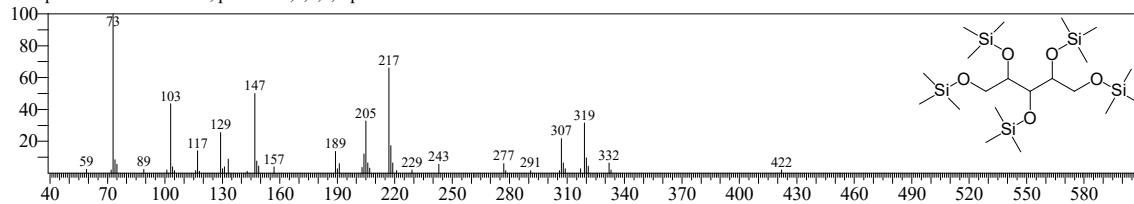

# TNAU

<< Target >>

Line#:20 R.Time:32.470(Scan#:5595) MassPeaks:278

RawMode:Averaged 32.465-32.475(5594-5596) BasePeak:207.05(1555)

BG Mode:Calc. from Peak Group 1 - Event 1 Q3 Scan

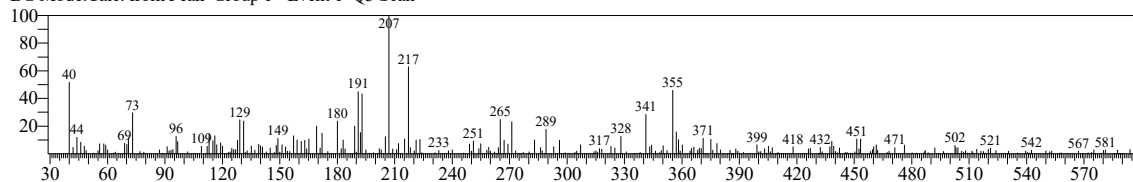

Hit#:1 Entry:210 Library:OA\_TMS\_DB5\_67min\_V3.lib

SI:41 Formula:C17H42O5Si4 CAS:10323-20-3 MolWeight:438 RetIndex:1634

CompName:Arabinose-4TMS(1) ; (2S,3R,4R)-2,3,4,5-tetrahydroxypentanal

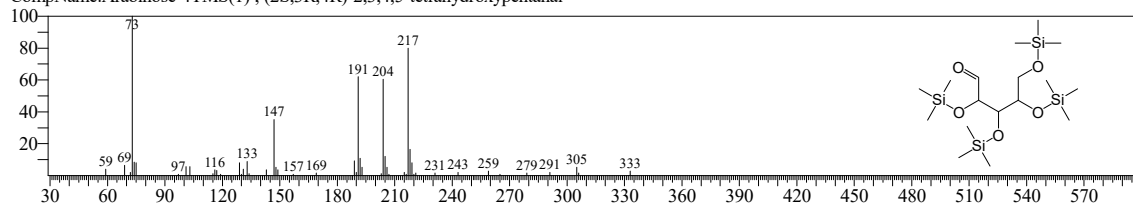

Hit#:2 Entry:250 Library:OA\_TMS\_DB5\_67min\_V3.lib

SI:41 Formula:C17H42O5Si4 CAS:50-69-1 MolWeight:438 RetIndex:1691

CompName:Ribose-4TMS(4) ; (3R,4S,5R)-5-(hydroxymethyl)oxolane-2,3,4-triol

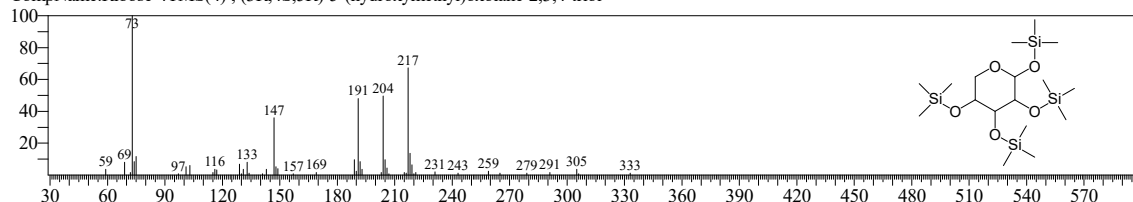

Hit#:3 Entry:238 Library:OA\_TMS\_DB5\_67min\_V3.lib

SI:38 Formula:C17H42O5Si4 CAS:1114-34-7 MolWeight:438 RetIndex:1675

CompName:Lyxose-4TMS(2) ; (2S,3S,4R)-2,3,4,5-tetrahydroxypentanal

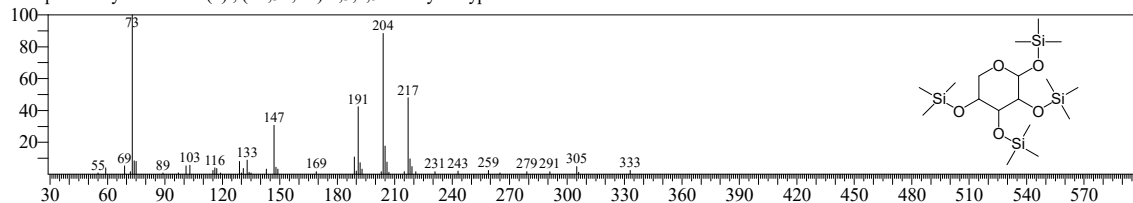

Hit#:4 Entry:295 Library:OA\_TMS\_DB5\_67min\_V3.lib

SI:38 Formula:C17H42O5Si4 CAS:58-86-6 MolWeight:438 RetIndex:1784

CompName:Xylose-4TMS(2) ; (2R,3S,4R)-2,3,4,5-tetrahydroxypentanal

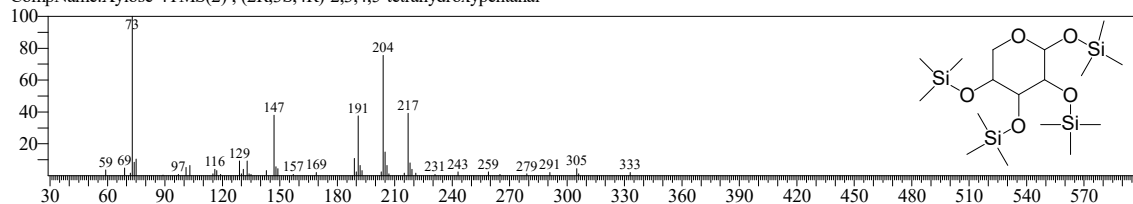

Hit#:5 Entry:351 Library:OA\_TMS\_DB5\_67min\_V3.lib

SI:35 Formula:C18H44O5Si4 CAS:154-58-5 MolWeight:452 RetIndex:1876

CompName:1,5-Anhydro-glucitol-4TMS ; (2R,3S,4R,5S)-2-(hydroxymethyl)oxane-3,4,5-triol

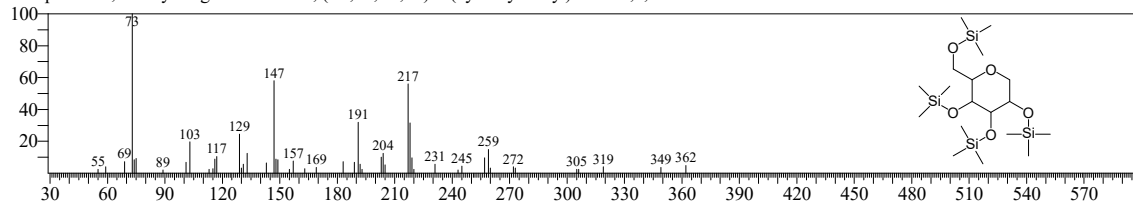

<< Target >>

Line#:21 R.Time:32.520(Scan#:5605) MassPeaks:290

RawMode:Averaged 32.515-32.525(5604-5606) BasePeak:207.05(2001)

BG Mode:Calc. from Peak Group 1 - Event 1 Q3 Scan

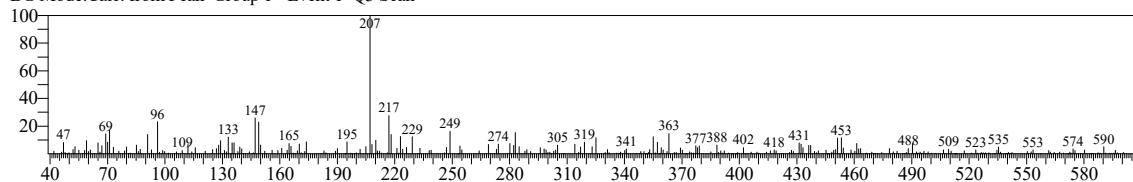

Hit#:1 Entry:326 Library:OA\_TMS\_DB5\_67min\_V3.lib

SI:27 Formula:C<sub>21</sub>H<sub>52</sub>O<sub>6</sub>Si<sub>5</sub> CAS:23140-52-5 MolWeight:540 RetIndex:1841

CompName:Psicose-5TMS(2) ; (3R,4R,5R)-1,3,4,5,6-pentahydroxyhexan-2-one

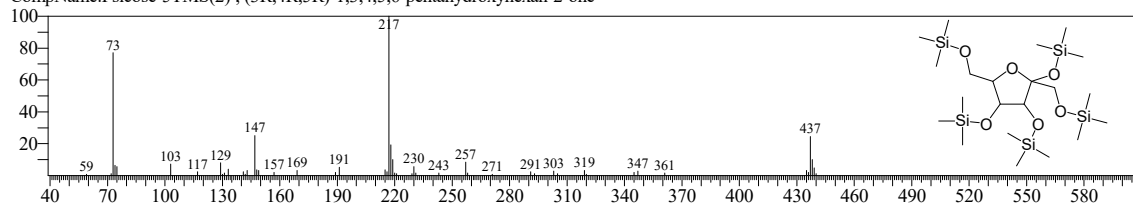

Hit#:2 Entry:80 Library:OA\_TMS\_DB5\_67min\_V3.lib

SI:26 Formula:C<sub>11</sub>H<sub>24</sub>O<sub>4</sub>Si<sub>2</sub> CAS:601-75-2 MolWeight:276 RetIndex:1284

CompName:Ethylmalonic acid-2TMS ; 2-ethylpropanedioic acid

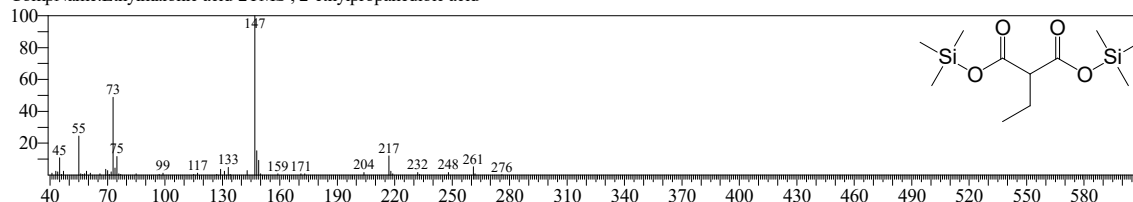

Hit#:3 Entry:413 Library:OA\_TMS\_DB5\_67min\_V3.lib

SI:26 Formula:C<sub>18</sub>H<sub>35</sub>NO<sub>3</sub>Si<sub>3</sub> CAS:60-18-4 MolWeight:397 RetIndex:1958

CompName:Tyrosine-3TMS ; (2S)-2-amino-3-(4-hydroxyphenyl)propanoic acid

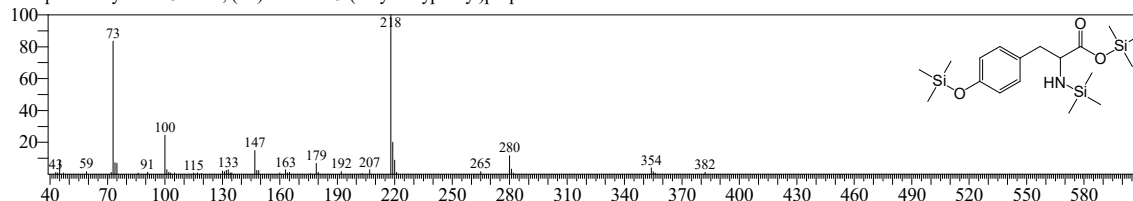

Hit#:4 Entry:230 Library:OA\_TMS\_DB5\_67min\_V3.lib

SI:25 Formula:C<sub>17</sub>H<sub>42</sub>O<sub>5</sub>Si<sub>4</sub> CAS:50-69-1 MolWeight:438 RetIndex:1666

CompName:Ribose-4TMS(2) ; (3R,4S,5R)-5-(hydroxymethyl)oxolane-2,3,4-triol

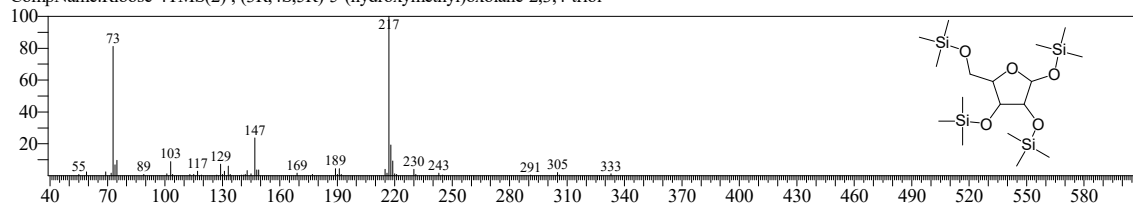

Hit#:5 Entry:100 Library:OA\_TMS\_DB5\_67min\_V3.lib

SI:25 Formula: CAS:0-00-0 MolWeight:264 RetIndex:1346

CompName:Fumaric acid-13C4-2TMS ;

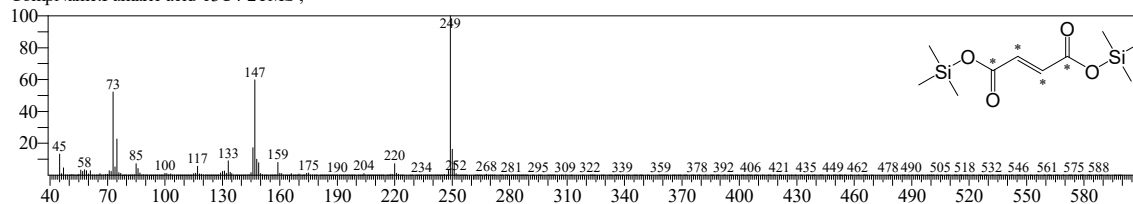

# TNAU

<< Target >>

Line#:22 R.Time:32.820(Scan#:5665) MassPeaks:305

RawMode:Averaged 32.815-32.825(5664-5666) BasePeak:207.05(1534)

BG Mode:Calc. from Peak Group 1 - Event 1 Q3 Scan

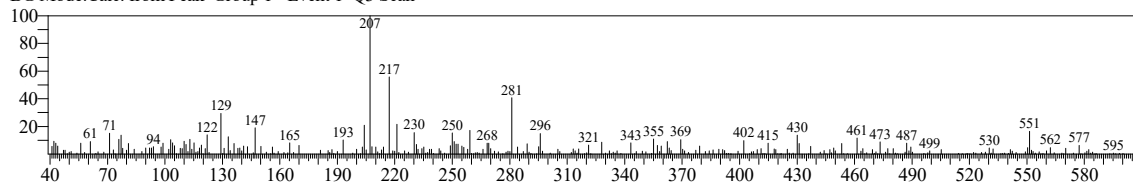

Hit#:1 Entry:276 Library:OA\_TMS\_DB5\_67min\_V3.lib

SI:30 Formula:C18H44O5Si4 CAS:154-17-6 MolWeight:452 RetIndex:1745

CompName:2-Deoxy-glucose-4TMS(1) ; (2S,4S,5S,6S)-6-(hydroxymethyl)oxane-2,4,5-triol

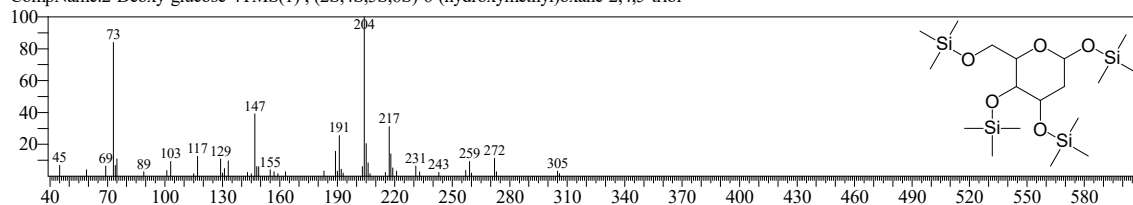

Hit#:2 Entry:345 Library:OA\_TMS\_DB5\_67min\_V3.lib

SI:30 Formula:C21H52O6Si5 CAS:59-23-4 MolWeight:540 RetIndex:1868

CompName:Galactose-5TMS(2) ; (3R,4S,5R,6R)-6-(hydroxymethyl)oxane-2,3,4,5-tetrol

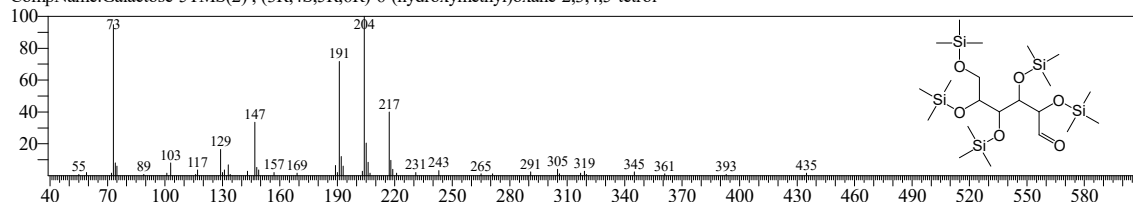

Hit#:3 Entry:227 Library:OA\_TMS\_DB5\_67min\_V3.lib

SI:29 Formula:C17H42O5Si4 CAS:50-69-1 MolWeight:438 RetIndex:1657

CompName:Ribose-4TMS(1) ; (3R,4S,5R)-5-(hydroxymethyl)oxolane-2,3,4-triol

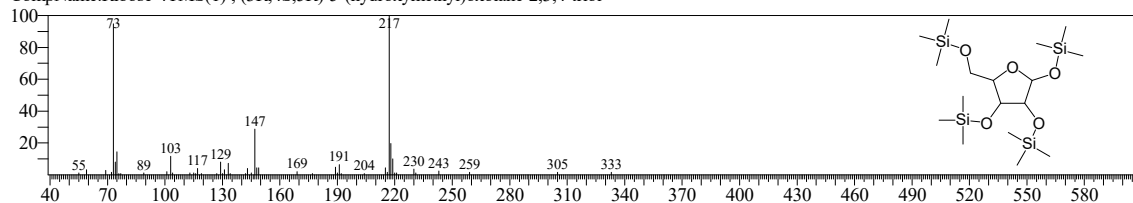

Hit#:4 Entry:349 Library:OA\_TMS\_DB5\_67min\_V3.lib

SI:29 Formula:C21H52O6Si5 CAS:2595-97-3 MolWeight:540 RetIndex:1874

CompName:Allose-5TMS ; (2R,3R,4R,5R)-2,3,4,5,6-pentahydroxyhexanal

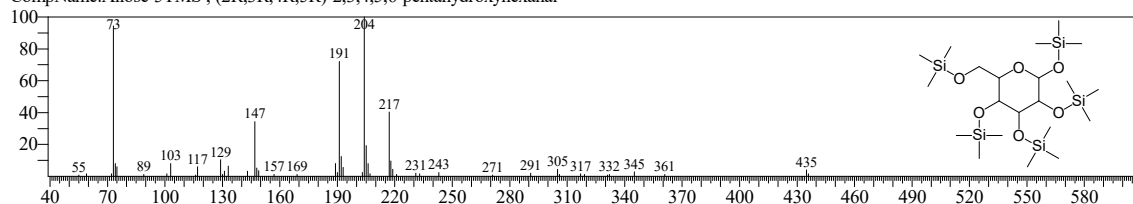

Hit#:5 Entry:555 Library:OA\_TMS\_DB5\_67min\_V3.lib

SI:29 Formula:C39H96O11Si9 CAS:585-86-4 MolWeight:992 RetIndex:2845

CompName:Lactitol-9TMS ; (2S,3R,4R,5R)-4-[(2S,3R,4S,5R,6R)-3,4,5-trihydroxy-6-(hydroxymethyl)oxan-2-yl]oxyhexane-1,2,3,5,6-pentol

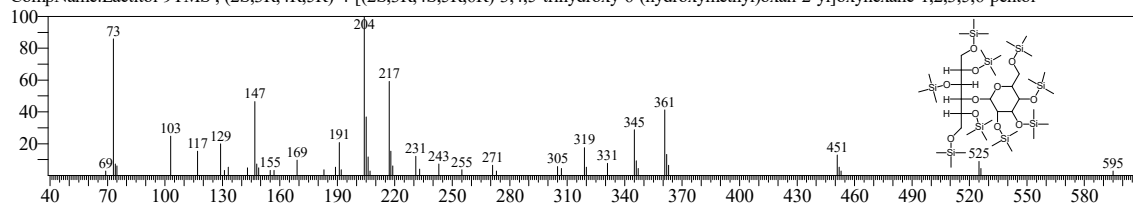

Supplement: Supplementary file 4 [file supplementary]
