# Supplementary material for: Comparative Metabolomics Profiling Reveals Key Metabolites and Associated Pathways Regulating Tuber Dormancy in White Yam (<em>Dioscorea rotundata</em>)
Source: Preprints.org preprint supplement (doi:10.20944/preprints202303.0378.v1), 2023-03-21

# TNAU

## Sample Information

Analyzed by : Admin  
 Analyzed : 02-Sep-22 10:17:00 AM  
 Sample Type : Unknown  
 Level # : 1  
 Sample Name : Sample  
 Sample ID : 7-1  
 IS Amount : [1]=1  
 Sample Amount : 1  
 Dilution Factor : 1  
 Vial # : 8  
 Injection Volume : 2.00  
 Data File : D:\GCMS-8040NX\Sep 2022\Users\01.09.2022\01092022020.qgd  
 Org Data File : D:\GCMS-8040NX\Sep 2022\Users\01.09.2022\01092022020.qgd  
 Method File : D:\GCMS-8040NX\Sep 2022\Method\Scan\_methodfile.qgm  
 Org Method File : D:\GCMS-8040NX\Sep 2022\Method\Scan\_methodfile.qgm  
 Report File :  
 Tuning File : D:\GCMS-8040NX\Aug 2022\Tuning Data\TUNING 25082022.qgt  
 Modified by : Admin  
 Modified : 05-Sep-22 11:04:21 AM

Chromatogram Sample D:\GCMS-8040NX\Sep 2022\Users\01.09.2022\01092022020.qgd

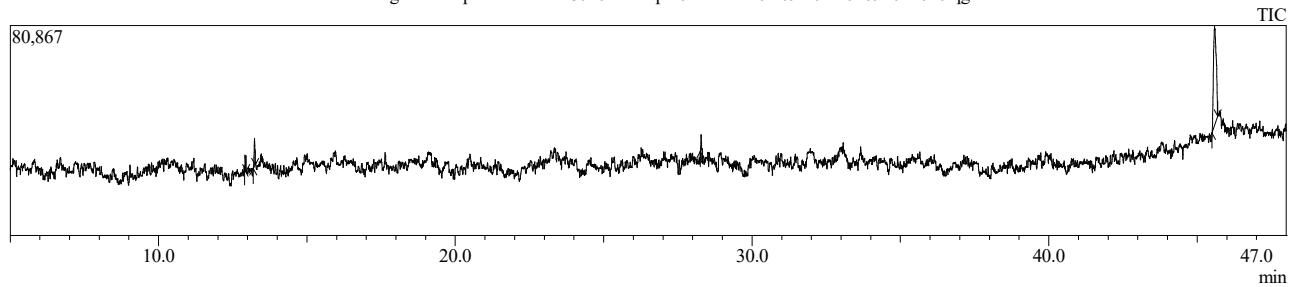

Peak Report TIC

| Peak# | R.Time | Area   | Area%  | Height | Height% | A/H  | Similarity | Name                           |
|-------|--------|--------|--------|--------|---------|------|------------|--------------------------------|
| 1     | 12.917 | 8464   | 2.91   | 5794   | 9.19    | 1.46 | 35         | Methyl butanoate               |
| 2     | 13.233 | 19115  | 6.57   | 10708  | 16.98   | 1.79 | 46         | Methyl cis-13,16-Docosadienate |
| 3     | 28.284 | 15047  | 5.17   | 8047   | 12.76   | 1.87 | 87         | n-Hexadecanoic acid            |
| 4     | 45.585 | 248492 | 85.36  | 38519  | 61.08   | 6.45 | 91         | Diosgenin                      |
|       |        | 291118 | 100.00 | 63068  | 100.00  |      |            |                                |

Library

# TNAU

<< Target >>

Line#:1 R.Time:12.915(Scan#:1584) MassPeaks:389  
RawMode:Averaged 12.910-12.920(1583-1585) BasePeak:42.00(232)  
BG Mode:Calc. from Peak Group 1 - Event 1 Q3 Scan

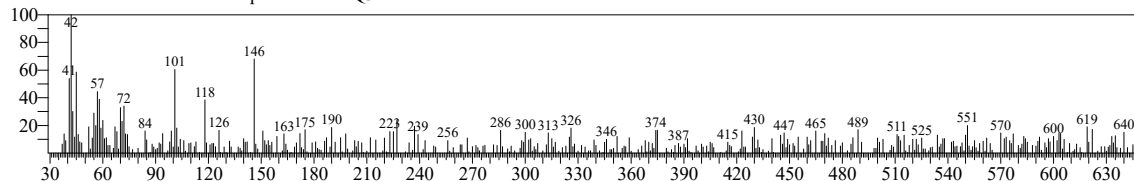

Hit#:1 Entry:1 Library:FA\_ME\_SP2560\_EI\_V3.lib  
SI:35 Formula:C5H10O2 CAS:107-92-6 MolWeight:102 RetIndex:1113  
CompName:Methyl butanoate ; Butanoic acid

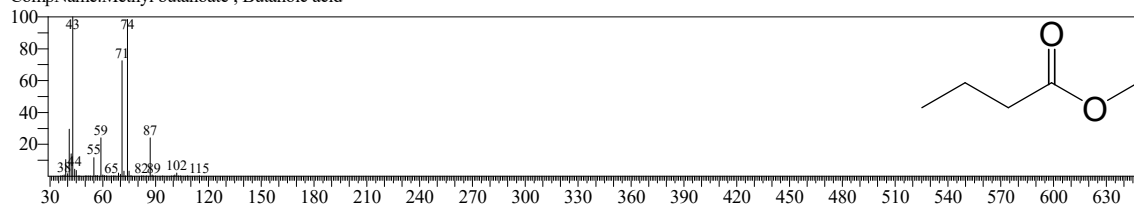

Hit#:2 Entry:1 Library:OA\_TMS\_DB5\_67min\_V3.lib  
SI:34 Formula:C7H17NO2Si CAS:1118-68-9 MolWeight:175 RetIndex:990  
CompName:Dimethylglycine-TMS ; 2-(dimethylamino)acetic acid

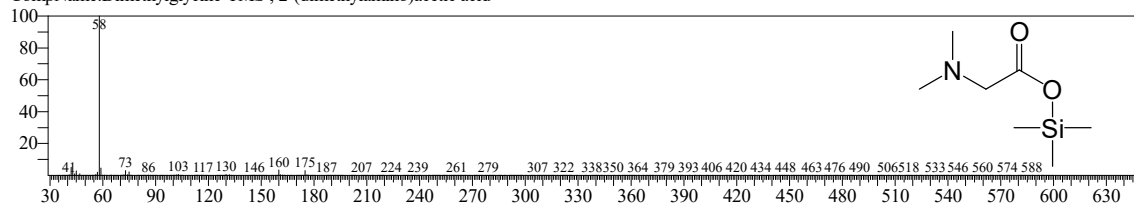

Hit#:3 Entry:395 Library:OA\_TMS\_DB5\_67min\_V3.lib  
SI:32 Formula:C10H16N4O2Si CAS:58-55-9 MolWeight:252 RetIndex:1936  
CompName:Theophylline-TMS ; 1,3-dimethyl-7H-purine-2,6-dione

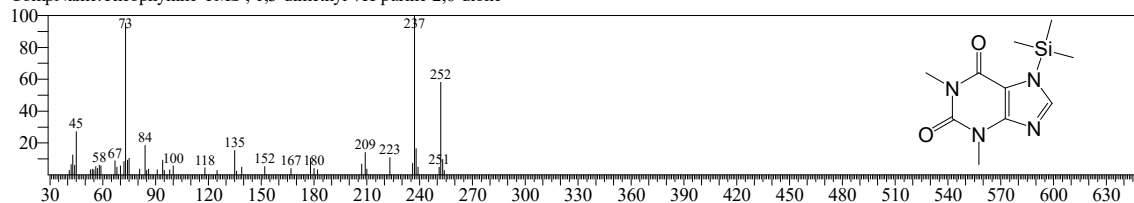

Hit#:4 Entry:13 Library:FA\_ME\_SP2560\_EI\_V3.lib  
SI:31 Formula:C17H32O2 CAS:373-49-9 MolWeight:268 RetIndex:2478  
CompName:Methyl palmitoleate ; Hexadec-9-enoic acid

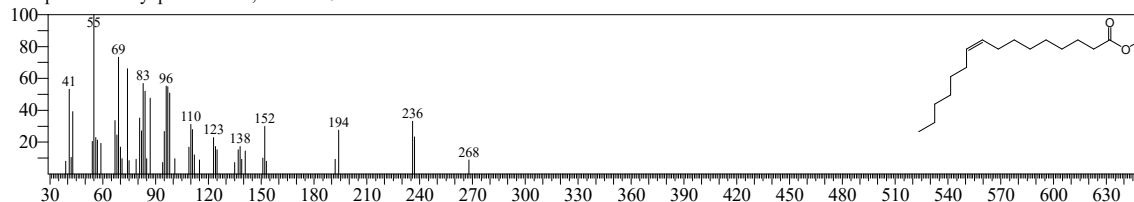

Hit#:5 Entry:11 Library:FA\_ME\_SP2560\_EI\_V3.lib  
SI:30 Formula:C16H30O2 CAS:84743-29-3 MolWeight:254 RetIndex:2388  
CompName:Methyl cis-10-pentadecenoate ; (Z)-pentadec-10-enoic acid

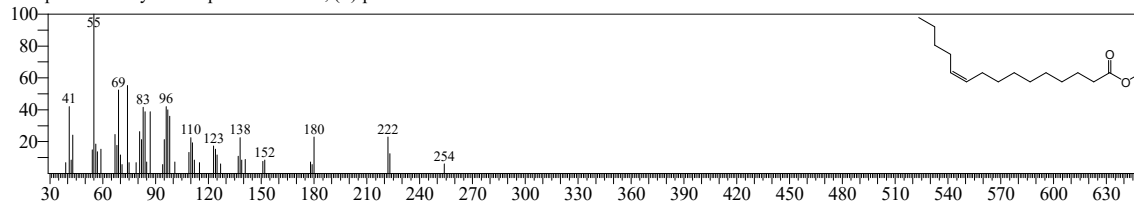

# TNAU

<< Target >>

Line#:2 R.Time:13.235(Scan#:1648) MassPeaks:386

RawMode:Averaged 13.230-13.240(1647-1649) BasePeak:155.05(1096)

BG Mode:Calc. from Peak Group 1 - Event 1 Q3 Scan

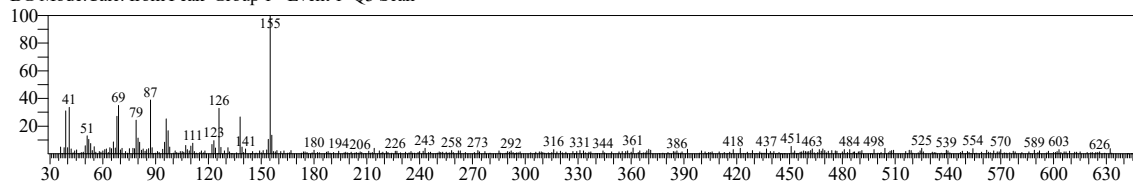

Hit#:1 Entry:34 Library:FA\_ME\_SP2560\_EI\_V3.lib

SI:46 Formula:C23H42O2 CAS:7370-49-2 MolWeight:350 RetIndex:3169

CompName:Methyl cis-13,16-Docosadienate ; (13Z,16E)-docosa-13,16-dienoic acid

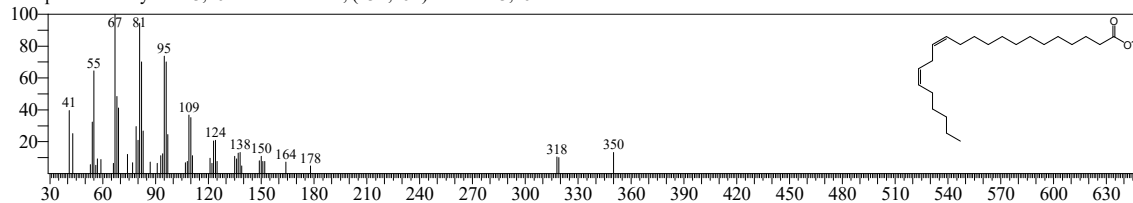

Hit#:2 Entry:21 Library:FA\_ME\_SP2560\_EI\_V3.lib

SI:46 Formula:C19H34O2 CAS:60-33-3 MolWeight:294 RetIndex:2775

CompName:Methyl linoleate ; Octadeca-9,12-dienoic acid

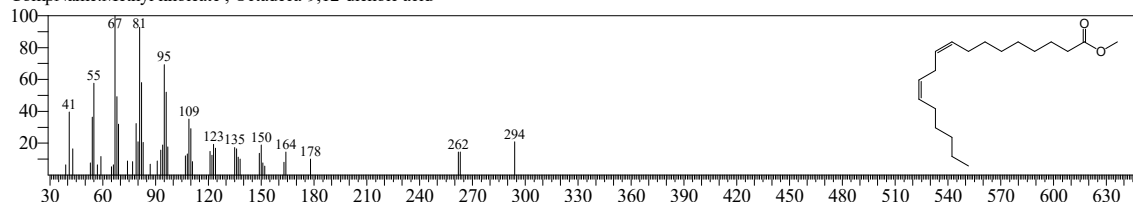

Hit#:3 Entry:20 Library:FA\_ME\_SP2560\_EI\_V3.lib

SI:45 Formula:C19H34O2 CAS:506-21-8 MolWeight:294 RetIndex:2727

CompName:Methyl linolelaidate ; (9E,12E)-octadeca-9,12-dienoic acid

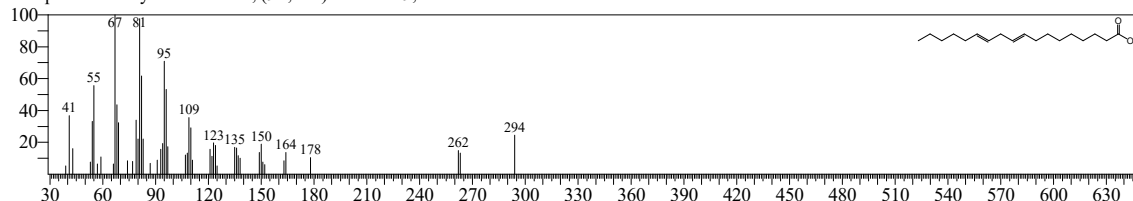

Hit#:4 Entry:27 Library:FA\_ME\_SP2560\_EI\_V3.lib

SI:44 Formula:C21H38O2 CAS:2091-39-6 MolWeight:322 RetIndex:2973

CompName:Methyl cis-11,14-Icosadienoate ; Icosa-11,14-dienoic acid

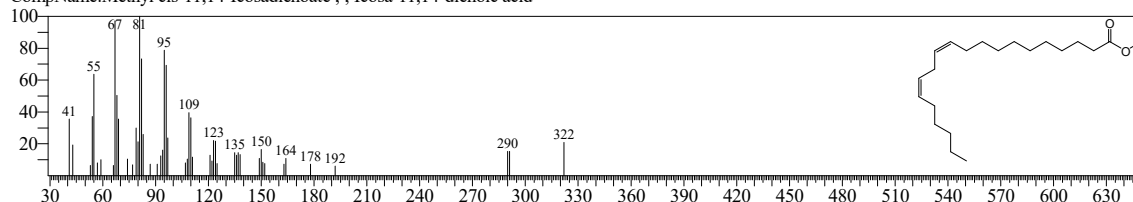

Hit#:5 Entry:11 Library:FA\_ME\_SP2560\_EI\_V3.lib

SI:44 Formula:C16H30O2 CAS:84743-29-3 MolWeight:254 RetIndex:2388

CompName:Methyl cis-10-pentadecenoate ; (Z)-pentadec-10-enoic acid

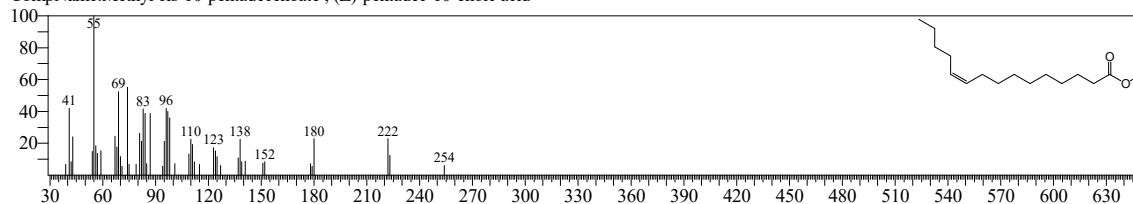

# TNAU

<< Target >>

Line#3 R.Time:28.285(Scan#:4658) MassPeaks:352

RawMode:Averaged 28.280-28.290(4657-4659) BasePeak:73.10(536)

BG Mode:Calc. from Peak Group 1 - Event 1 Q3 Scan

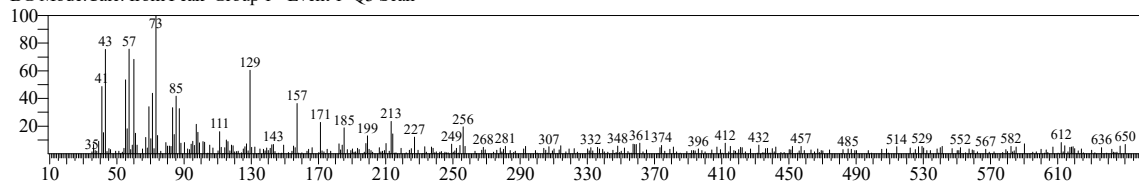

Hit#1 Entry:31600 Library:NIST20R.lib

SI:87 Formula:C16H32O2 CAS:57-10-3 MolWeight:256 RetIndex:1968

CompName:n-Hexadecanoic acid \$ Hexadecanoic acid \$ n-Hexadecic acid \$ Palmitic acid \$ Pentadecanecarboxylic acid \$ 1-Pentadecanecarboxylic

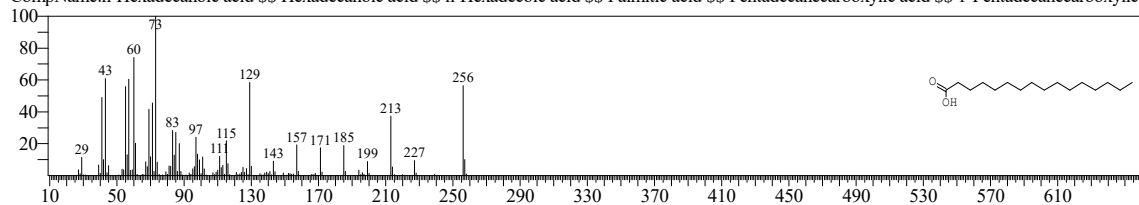

Hit#2 Entry:44286 Library:NIST20M2.lib

SI:85 Formula:C38H68O8 CAS:28474-90-0 MolWeight:652 RetIndex:4765

CompName:l-(+)-Ascorbic acid 2,6-dihexadecanoate

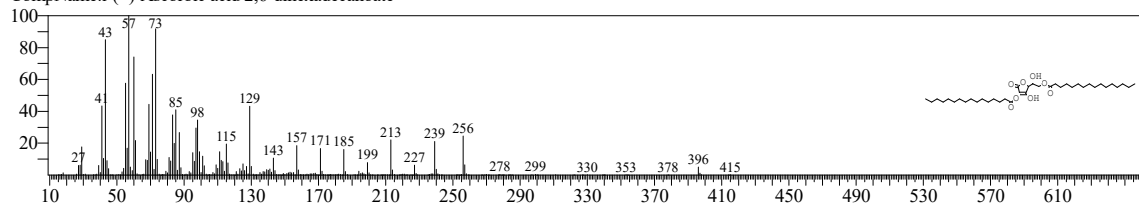

Hit#3 Entry:29890 Library:NIST20R.lib

SI:83 Formula:C15H30O2 CAS:1002-84-2 MolWeight:242 RetIndex:1869

CompName:Pentadecanoic acid \$ Pentadecylic acid \$ n-Pentadecanoic acid \$ n-Pentadecylic acid

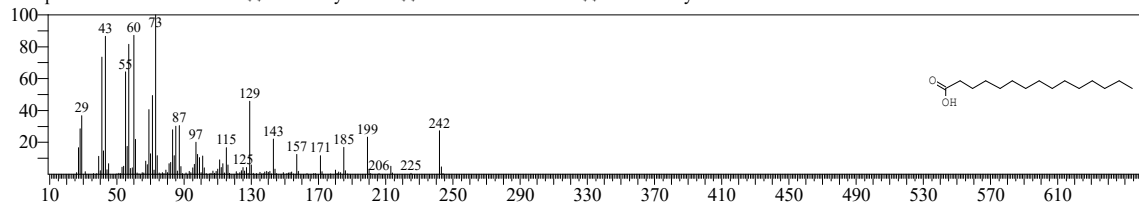

Hit#4 Entry:25643 Library:NIST20R.lib

SI:83 Formula:C13H26O2 CAS:638-53-9 MolWeight:214 RetIndex:1670

CompName:Tridecanoic acid \$ n-Tridecanoic acid \$ n-Tridecoic acid \$ Tridecyllic acid

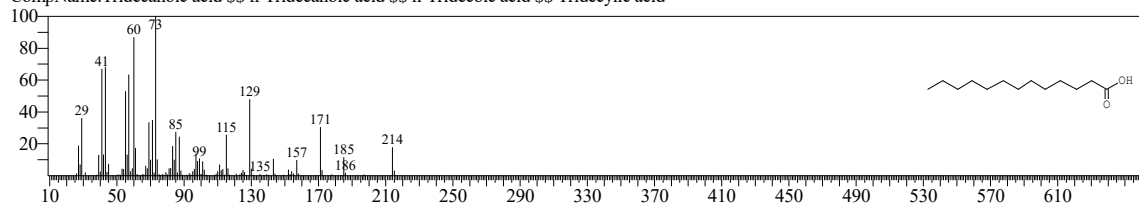

Hit#5 Entry:144781 Library:NIST20M1.lib

SI:82 Formula:C18H36O2 CAS:57-11-4 MolWeight:284 RetIndex:2167

CompName:Octadecanoic acid \$ Stearic acid \$ n-Octadecanoic acid \$ Humko Industriene R \$ Hydrofol Acid 150 \$ Hystrene S-97 \$ Hystrene T-70 \$

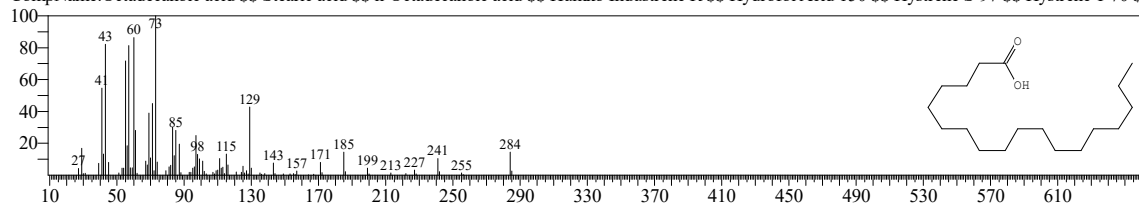

# TNAU

<< Target >>

Line#:4 R.Time:45.585(Scan#:8118) MassPeaks:403

RawMode:Averaged 45.580-45.590(8117-8119) BasePeak:139.10(3978)

BG Mode:Calc. from Peak Group 1 - Event 1 Q3 Scan

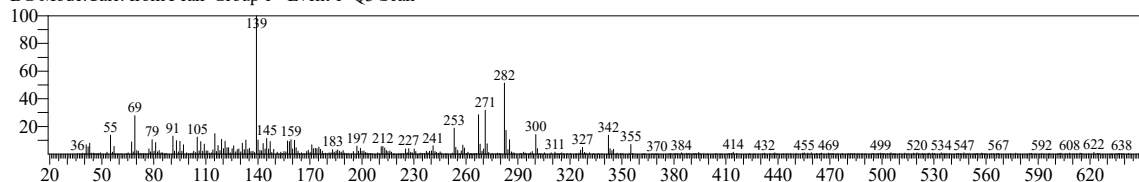

Hit#:1 Entry:8297 Library:NIST20M2.lib

SI:91 Formula:C27H42O3 CAS:512-04-9 MolWeight:414 RetIndex:2844

CompName:Diosgenin \$\$ Spirost-5-en-3-ol, (3.beta.,25R)- \$\$ Spirost-5-en-3.beta.-ol, (25R)- \$\$ Nitrogenin \$\$ 25D-spirost-5-en-3.beta.-ol \$\$ Spiro(8H-nap

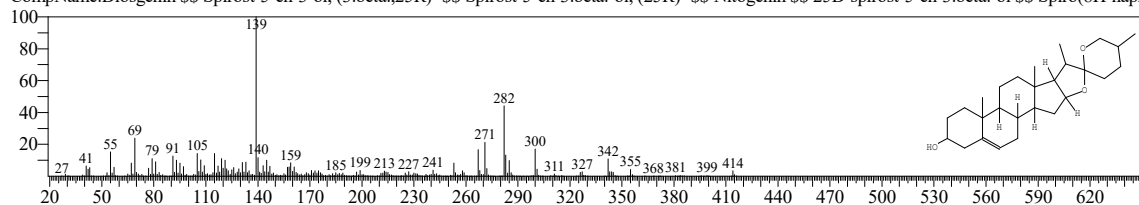

Hit#:2 Entry:41561 Library:NIST20R.lib

SI:80 Formula:C27H42O2 CAS:32277-73-9 MolWeight:398 RetIndex:2713

CompName:Des-N-solasodine \$\$ Furosta-5,20(22)-dien-3-ol #

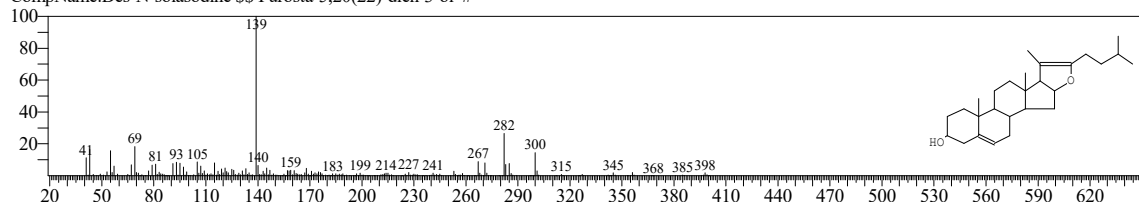

Hit#:3 Entry:14852 Library:NIST20M2.lib

SI:79 Formula:C28H44O3 CAS:116292-24-1 MolWeight:428 RetIndex:2793

CompName:Diosgenin methyl ether \$\$ Diosgenin Me derivative \$\$ (3.beta.,25R)-3-Methoxyspirost-5-ene \$\$ Spirost-5-ene, 3-methoxy-, (3.beta.,25R)-

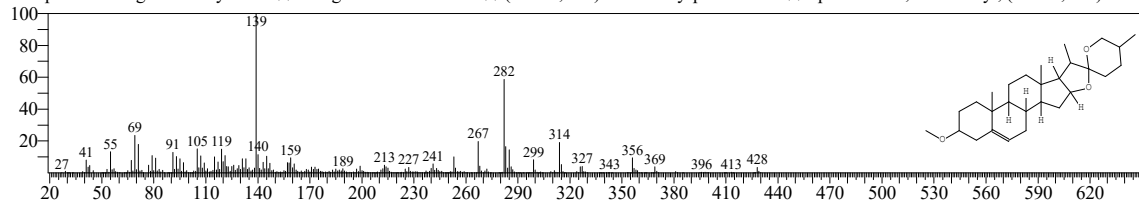

Hit#:4 Entry:24878 Library:NIST20M2.lib

SI:79 Formula:C29H44O4 CAS:1061-54-7 MolWeight:456 RetIndex:2984

CompName:Spirost-5-en-3-ol, acetate, (3.beta.,25R)- \$\$ Diosgenin acetate \$\$ Spirost-5-en-3.beta.-ol, acetate, (25R)- \$\$ Spirost-5-en-3.beta.-ol, acetate, (25R)-

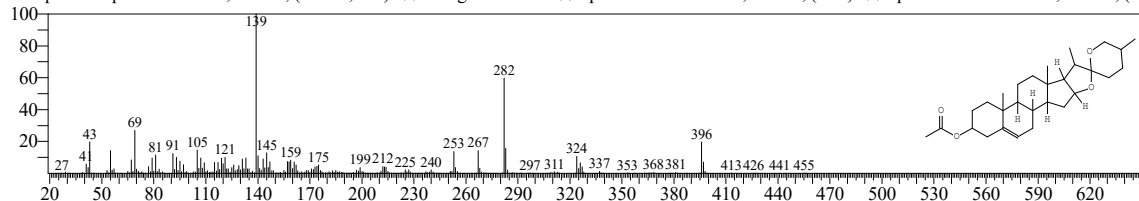

Hit#:5 Entry:42677 Library:NIST20R.lib

SI:75 Formula:C29H44O4 CAS:1180-12-7 MolWeight:456 RetIndex:2984

CompName:Neodiosgenin (3.beta.,25S) acetate \$\$ Spirost-5-en-3-ol, 3-acetate, (3.beta.,25S)- \$\$ Spirost-5-en-3-ol, acetate, (3.beta.,25S)- \$\$ Spirost-5-en-3-ol, acetate, (3.beta.,25S)-

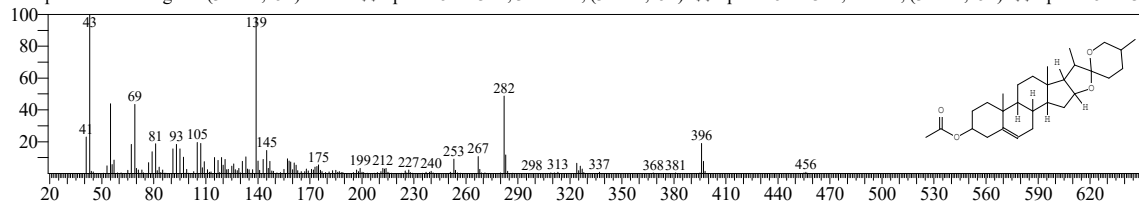

Supplement: Supplementary file 5 [file supplementary]
