# Supplementary material for: Comparative Metabolomics Profiling Reveals Key Metabolites and Associated Pathways Regulating Tuber Dormancy in White Yam (<em>Dioscorea rotundata</em>)
Source: Preprints.org preprint supplement (doi:10.20944/preprints202303.0378.v1), 2023-03-21

# TNAU

## Sample Information

Analyzed by : Admin  
 Analyzed : 05-Aug-22 10:26:30 AM  
 Sample Type : Unknown  
 Level # : 1  
 Sample Name : T87-1  
 Sample ID : T87-1  
 IS Amount : [1]=1  
 Sample Amount : 1  
 Dilution Factor : 1  
 Vial # : 27  
 Injection Volume : 1.00  
 Data File : D:\GCMS-8040NX\Aug 2022\Users\04.08.2022\Data files\04082022-028.qgd  
 Org Data File : D:\GCMS-8040NX\Aug 2022\Users\04.08.2022\Data files\04082022-028.qgd  
 Method File : D:\GCMS-8040NX\Aug 2022\Users\04.08.2022\Method file\27072022\_methodfile.qgm  
 Org Method File : D:\GCMS-8040NX\Aug 2022\Users\04.08.2022\Method file\27072022\_methodfile.qgm  
 Report File :  
 Tuning File : D:\GCMS-8040NX\Aug 2022\Tuning Data\TUNING 04082022.qgt  
 [Comment]  
 Jerry samples  
 Modified by : Admin  
 Modified : 05-Aug-22 4:45:25 PM

Chromatogram T87-1 D:\GCMS-8040NX\Aug 2022\Users\04.08.2022\Data files\04082022-028.qgd

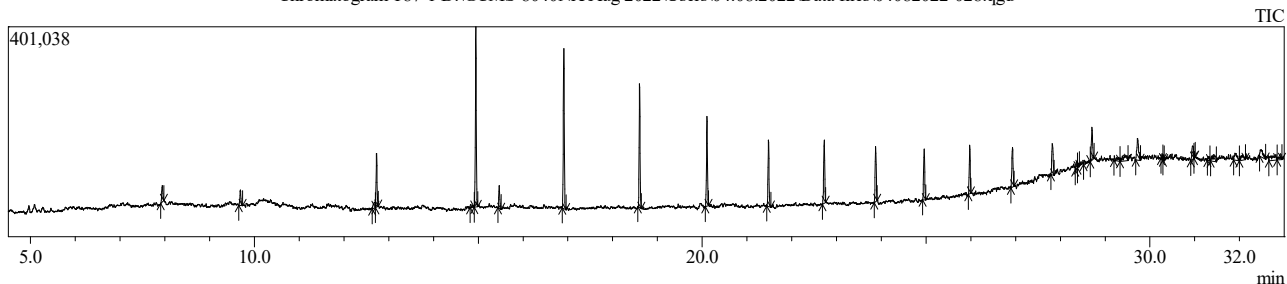

Peak Report TIC

| Peak# | R.Time | Area   | Area% | Height | Height% | A/H  | Similarity | Name                                 |
|-------|--------|--------|-------|--------|---------|------|------------|--------------------------------------|
| 1     | 7.941  | 54302  | 1.37  | 31725  | 1.41    | 1.71 | 91         | Undecane                             |
| 2     | 9.685  | 52566  | 1.32  | 29634  | 1.32    | 1.77 | 90         | Dodecane                             |
| 3     | 12.650 | 32639  | 0.82  | 7405   | 0.33    | 4.41 | 39         | Epinephrine-3TMS                     |
| 4     | 12.727 | 161875 | 4.08  | 101983 | 4.55    | 1.59 | 89         | Cyclohexasiloxane, dodecamethyl-     |
| 5     | 14.825 | 14459  | 0.36  | 5741   | 0.26    | 2.52 | 41         | 3,4-Dihydroxymandelic acid-4TMS      |
| 6     | 14.944 | 507282 | 12.78 | 343875 | 15.33   | 1.48 | 94         | Cycloheptasiloxane, tetradecamethyl- |
| 7     | 15.467 | 67286  | 1.70  | 43560  | 1.94    | 1.54 | 91         | 2,4-Di-tert-butylphenol              |
| 8     | 16.910 | 460584 | 11.60 | 305976 | 13.64   | 1.51 | 92         | Cyclooctasiloxane, hexadecamethyl-   |
| 9     | 18.602 | 357324 | 9.00  | 236931 | 10.56   | 1.51 | 91         | Cyclononasiloxane, octadecamethyl-   |
| 10    | 20.106 | 265991 | 6.70  | 171518 | 7.65    | 1.55 | 87         | Cyclodecasiloxane, eicosamethyl-     |
| 11    | 21.482 | 208988 | 5.27  | 127192 | 5.67    | 1.64 | 85         | Cyclooctasiloxane, hexadecamethyl-   |
| 12    | 22.725 | 201777 | 5.08  | 120893 | 5.39    | 1.67 | 87         | Cyclononasiloxane, octadecamethyl-   |
| 13    | 23.874 | 177576 | 4.47  | 105486 | 4.70    | 1.68 | 87         | Cyclodecasiloxane, eicosamethyl-     |
| 14    | 24.958 | 168659 | 4.25  | 97123  | 4.33    | 1.74 | 86         | Cyclodecasiloxane, eicosamethyl-     |
| 15    | 25.976 | 146458 | 3.69  | 92905  | 4.14    | 1.58 | 85         | Tetracosamethyl-cyclododecasiloxane  |
| 16    | 26.931 | 140237 | 3.53  | 75419  | 3.36    | 1.86 | 84         | Tetracosamethyl-cyclododecasiloxane  |
| 17    | 27.821 | 121813 | 3.07  | 60155  | 2.68    | 2.02 | 82         | Tetracosamethyl-cyclododecasiloxane  |
| 18    | 28.360 | 21517  | 0.54  | 13181  | 0.59    | 1.63 | 27         | 3,4-Dihydroxymandelic acid-4TMS      |
| 19    | 28.402 | 9529   | 0.24  | 7904   | 0.35    | 1.21 | 28         | 3,4-Dihydroxymandelic acid-4TMS      |
| 20    | 28.525 | 16457  | 0.41  | 6418   | 0.29    | 2.56 | 27         | 4-Aminobenzoic acid-2TMS             |
| 21    | 28.705 | 125254 | 3.16  | 62859  | 2.80    | 1.99 | 82         | Tetracosamethyl-cyclododecasiloxane  |
| 22    | 29.205 | 33579  | 0.85  | 8821   | 0.39    | 3.81 | 38         | 4-Hydroxybenzoic acid-2TMS           |

# TNAU

| Peak# | R.Time | Area    | Area%  | Height  | Height% | A/H  | Similarity | Name                                        |
|-------|--------|---------|--------|---------|---------|------|------------|---------------------------------------------|
| 23    | 29.488 | 64379   | 1.62   | 9294    | 0.41    | 6.93 | 39         | 3-Hydroxybenzoic acid-2TMS                  |
| 24    | 29.722 | 115629  | 2.91   | 41434   | 1.85    | 2.79 | 80         | Tetracosamethyl-cyclododecasiloxane         |
| 25    | 30.272 | 11140   | 0.28   | 10207   | 0.46    | 1.09 | 36         | Hypoxanthine-2TMS                           |
| 26    | 30.305 | 8683    | 0.22   | 10813   | 0.48    | 0.80 | 32         | Phosphoric acid-3TMS                        |
| 27    | 30.955 | 67206   | 1.69   | 24991   | 1.11    | 2.69 | 51         | 3,4-Dihydroxymandelic acid-4TMS             |
| 28    | 30.990 | 12615   | 0.32   | 12518   | 0.56    | 1.01 | 32         | 3-Hydroxybenzoic acid-2TMS                  |
| 29    | 31.297 | 15399   | 0.39   | 7663    | 0.34    | 2.01 | 32         | Vanilmandelic acid-3TMS                     |
| 30    | 31.431 | 54611   | 1.38   | 12597   | 0.56    | 4.34 | 37         | 4-Aminobenzoic acid-2TMS                    |
| 31    | 31.900 | 54229   | 1.37   | 13259   | 0.59    | 4.09 | 35         | 4-Hydroxybenzoic acid-2TMS                  |
| 32    | 32.005 | 47319   | 1.19   | 8298    | 0.37    | 5.70 | 37         | 3-(3-Hydroxyphenyl)-3-hydroxypropionic acid |
| 33    | 32.485 | 71302   | 1.80   | 14161   | 0.63    | 5.04 | 44         | 3,4-Dihydroxymandelic acid-4TMS             |
| 34    | 32.813 | 75015   | 1.89   | 10938   | 0.49    | 6.86 | 41         | 4-Aminobenzoic acid-2TMS                    |
| 35    | 32.928 | 25402   | 0.64   | 9907    | 0.44    | 2.56 | 39         | Chloramphenicol-2TMS                        |
|       |        | 3969081 | 100.00 | 2242784 | 100.00  |      |            |                                             |

## Library

<< Target >>

Line#:1 R.Time:7.940(Scan#:689) MassPeaks:300

RawMode:Averaged 7.935-7.945(688-690) BasePeak:57.10(7302)

BG Mode:Calc. from Peak Group 1 - Event 1 Q3 Scan

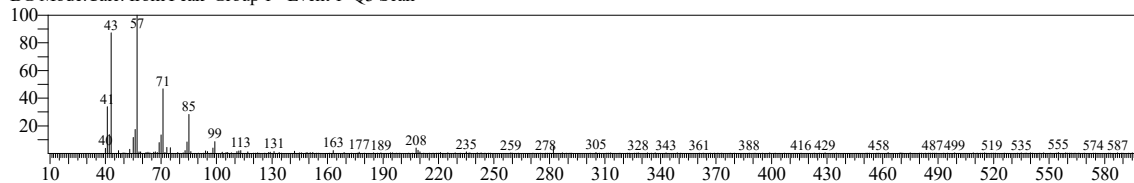

Hit#:1 Entry:21042 Library:NIST20M1.lib

SI:91 Formula:C11H24 CAS:1120-21-4 MolWeight:156 RetIndex:1100

CompName:Undecane \$\$ n-Undecane \$\$ Hendecane \$\$ n-C11H24 \$\$ UN 2330

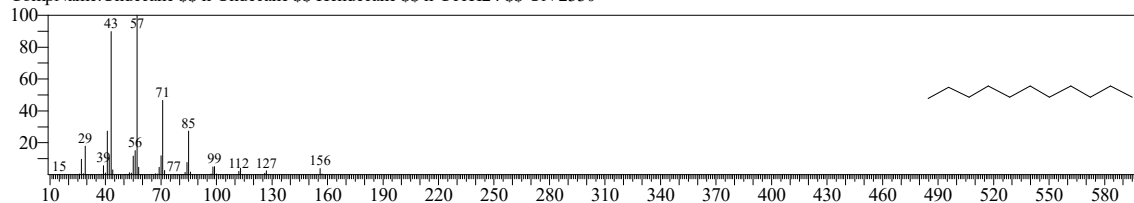

Hit#:2 Entry:40226 Library:NIST20M1.lib

SI:91 Formula:C13H28 CAS:629-50-5 MolWeight:184 RetIndex:1300

CompName:Tridecane \$\$ n-Tridecane \$\$ Tridecane, n-

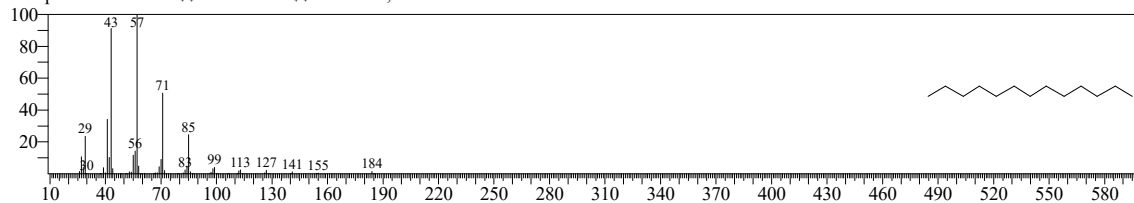

Hit#:3 Entry:27737 Library:NIST20R.lib

SI:89 Formula:C16H34 CAS:544-76-3 MolWeight:226 RetIndex:1600

CompName:Hexadecane \$\$ n-Cetane \$\$ n-Hexadecane \$\$ Cetane

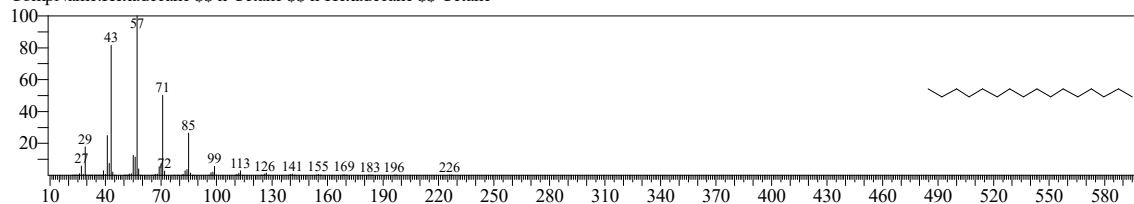

# TNAU

<< Target >>

Line#:1 R.Time:7.940(Scan#:689) MassPeaks:300

RawMode:Averaged 7.935-7.945(688-690) BasePeak:57.10(7302)

BG Mode:Calc. from Peak Group 1 - Event 1 Q3 Scan

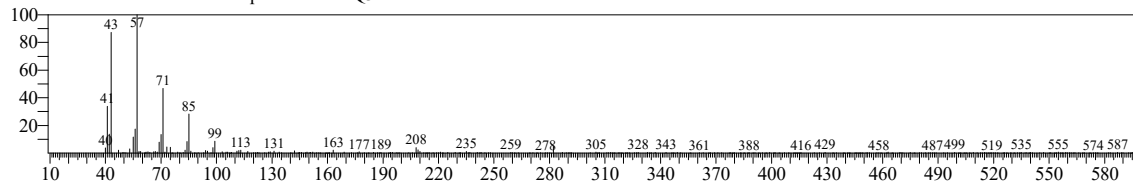

Hit#:4 Entry:9444 Library:NIST20R.lib

SI:89 Formula:C<sub>10</sub>H<sub>22</sub> CAS:124-18-5 MolWeight:142 RetIndex:1000

CompName:Decane \$\$ n-Decane \$\$ n-C<sub>10</sub>H<sub>22</sub> \$\$ UN 2247

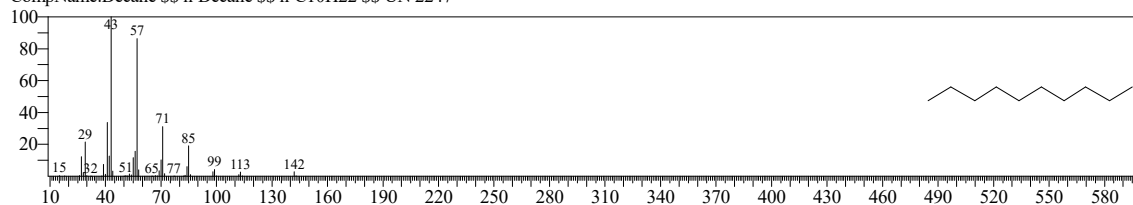

Hit#:5 Entry:16191 Library:NIST20R.lib

SI:89 Formula:C<sub>12</sub>H<sub>26</sub> CAS:112-40-3 MolWeight:170 RetIndex:1200

CompName:Dodecane \$\$ n-Dodecane \$\$ Adakane 12 \$\$ Ba 51-090453 \$\$ CH<sub>3</sub>(CH<sub>2</sub>)<sub>10</sub>CH<sub>3</sub> \$\$ Bihexyl \$\$ Dihexyl \$\$ Duodecane \$\$ NSC 8714

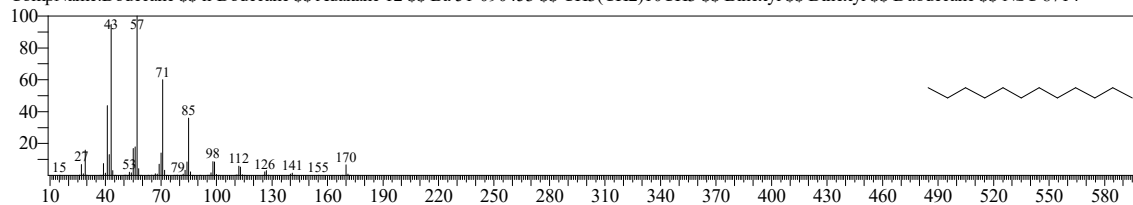

# TNAU

<< Target >>

Line# 2 R.Time: 9.685 (Scan#: 1038) MassPeaks: 309

RawMode: Averaged 9.680-9.690 (1037-1039) BasePeak: 57.10 (6188)

BG Mode: Calc. from Peak Group 1 - Event 1 Q3 Scan

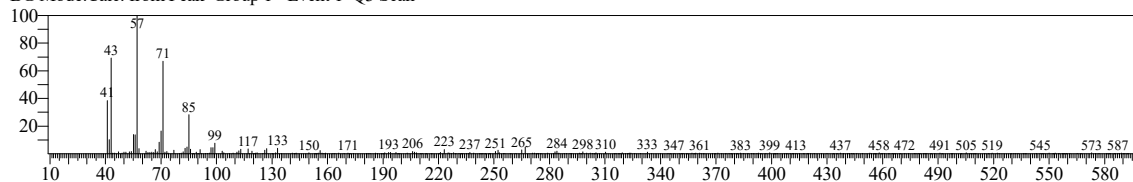

Hit#: 1 Entry: 30057 Library: NIST20M1.lib

SI: 90 Formula: C<sub>12</sub>H<sub>26</sub> CAS: 112-40-3 MolWeight: 170 RetIndex: 1200

CompName: Dodecane \$\$ n-Dodecane \$\$ Adakane 12 \$\$ Ba 51-090453 \$\$ CH<sub>3</sub>(CH<sub>2</sub>)<sub>10</sub>CH<sub>3</sub> \$\$ Bihexyl \$\$ Dihexyl \$\$ Duodecane \$\$ NSC 8714

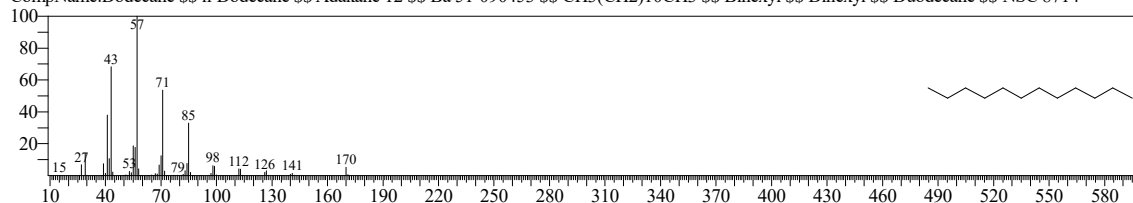

Hit#: 2 Entry: 25291 Library: NIST20R.lib

SI: 90 Formula: C<sub>15</sub>H<sub>32</sub> CAS: 31295-56-4 MolWeight: 212 RetIndex: 1320

CompName: Dodecane, 2,6,11-trimethyl- \$\$ 2,6,11-Trimethyldodecane

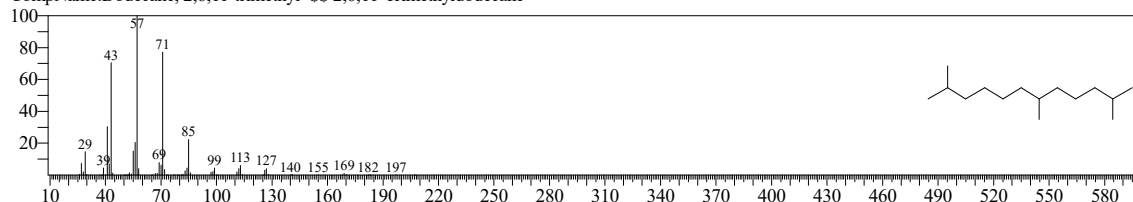

Hit#: 3 Entry: 22497 Library: NIST20R.lib

SI: 90 Formula: C<sub>14</sub>H<sub>30</sub> CAS: 629-59-4 MolWeight: 198 RetIndex: 1400

CompName: Tetradecane \$\$ n-Tetradecane

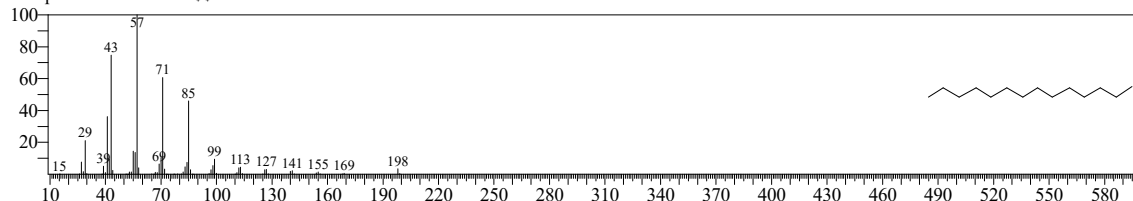

Hit#: 4 Entry: 12898 Library: NIST20R.lib

SI: 90 Formula: C<sub>11</sub>H<sub>24</sub> CAS: 1120-21-4 MolWeight: 156 RetIndex: 1100

CompName: Undecane \$\$ n-Undecane \$\$ Hendecane \$\$ n-C<sub>11</sub>H<sub>24</sub> \$\$ UN 2330

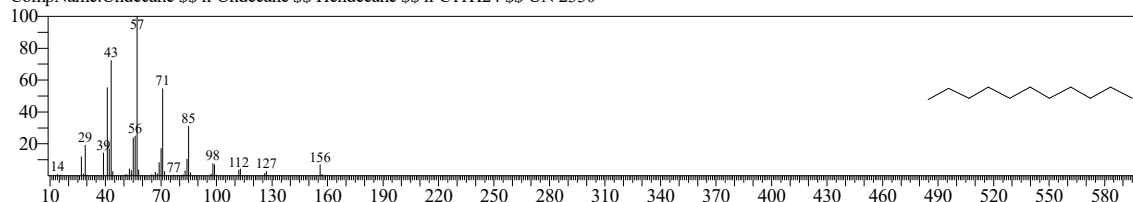

Hit#: 5 Entry: 27736 Library: NIST20R.lib

SI: 90 Formula: C<sub>16</sub>H<sub>34</sub> CAS: 544-76-3 MolWeight: 226 RetIndex: 1600

CompName: Hexadecane \$\$ n-Cetane \$\$ n-Hexadecane \$\$ Cetane

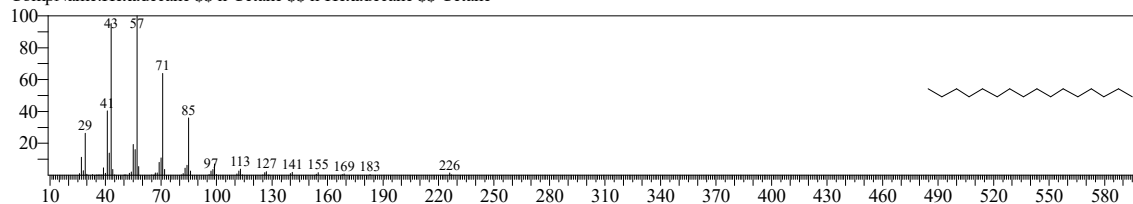

# TNAU

<< Target >>

Line#:3 R.Time:12.650(Scan#:1631) MassPeaks:310

RawMode:Averaged 12.645-12.655(1630-1632) BasePeak:266.90(663)

BG Mode:Calc. from Peak Group 1 - Event 1 Q3 Scan

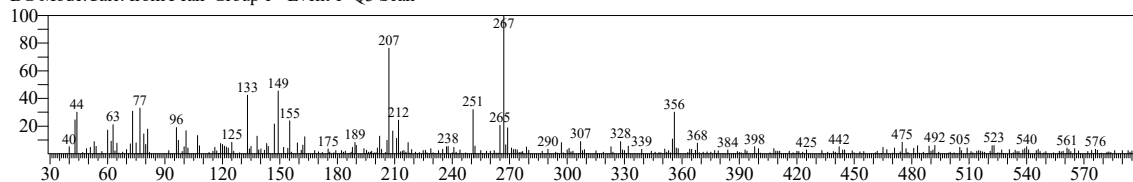

Hit#:1 Entry:343 Library:OA\_TMS\_DB5\_67min\_V3.lib

SI:39 Formula:C18H37NO3Si3 CAS:51-43-4 MolWeight:399 RetIndex:1868

CompName:Epinephrine-3TMS ; 4-[(1R)-1-hydroxy-2-(methylamino)ethyl]benzene-1,2-diol

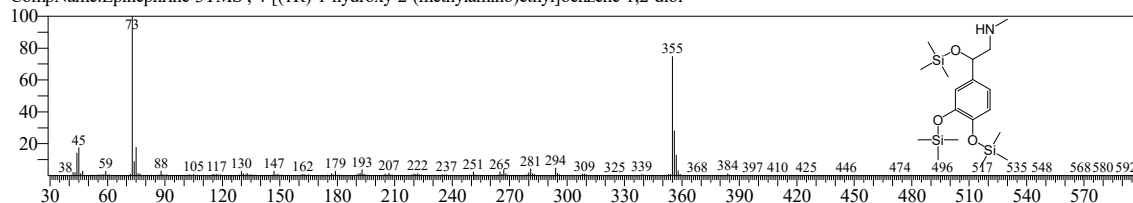

Hit#:2 Entry:402 Library:OA\_TMS\_DB5\_67min\_V3.lib

SI:39 Formula:C20H42O4Si4 CAS:775-01-9 MolWeight:458 RetIndex:1942

CompName:3,4-Dihydroxymandelic acid-4TMS ; 2-(3,4-dihydroxyphenyl)-2-hydroxyacetic acid

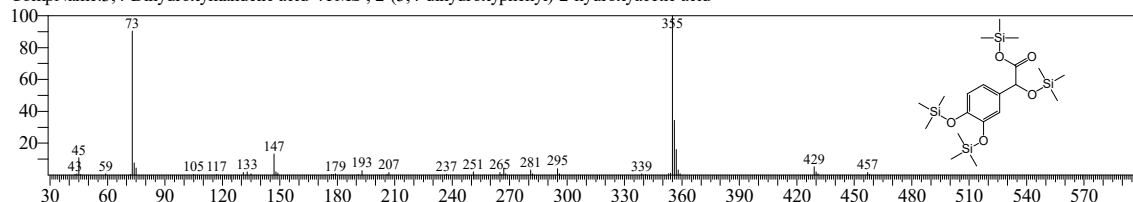

Hit#:3 Entry:179 Library:OA\_TMS\_DB5\_67min\_V3.lib

SI:38 Formula:C13H22O3Si2 CAS:99-06-9 MolWeight:282 RetIndex:1572

CompName:3-Hydroxybenzoic acid-2TMS ; 3-hydroxybenzoic acid

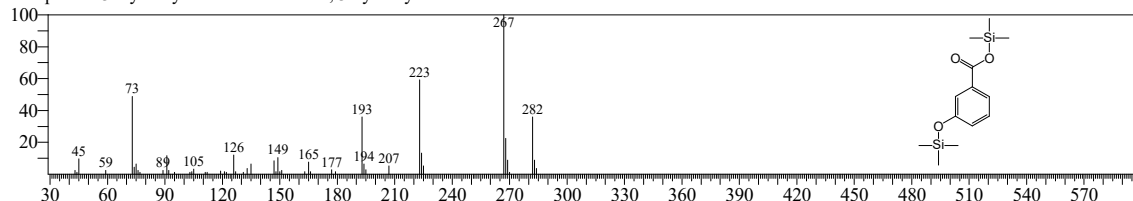

Hit#:4 Entry:294 Library:OA\_TMS\_DB5\_67min\_V3.lib

SI:37 Formula:C15H26O4Si2 CAS:306-08-1 MolWeight:326 RetIndex:1782

CompName:Homovanillic acid-2TMS ; 2-(4-hydroxy-3-methoxyphenyl)acetic acid

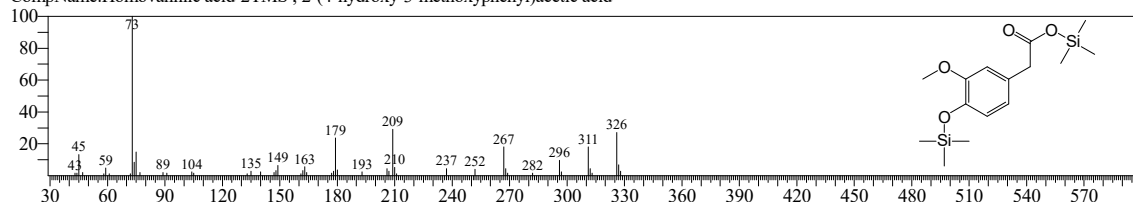

Hit#:5 Entry:211 Library:OA\_TMS\_DB5\_67min\_V3.lib

SI:36 Formula:C13H22O3Si2 CAS:99-96-7 MolWeight:282 RetIndex:1636

CompName:4-Hydroxybenzoic acid-2TMS ; 4-hydroxybenzoic acid

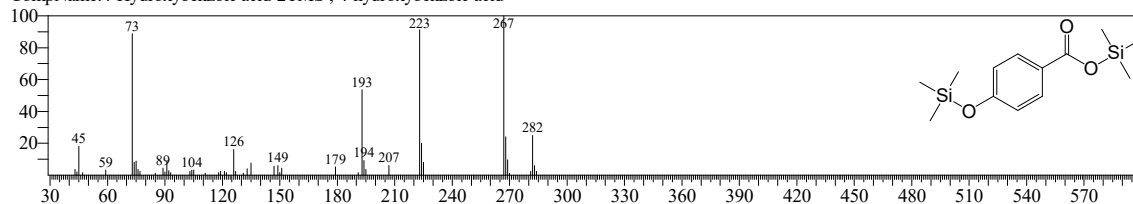

# TNAU

<< Target >>

Line#:4 R.Time:12.725(Scan#:1646) MassPeaks:298

RawMode:Averaged 12.720-12.730(1645-1647) BasePeak:341.00(21033)

BG Mode:Calc. from Peak Group 1 - Event 1 Q3 Scan

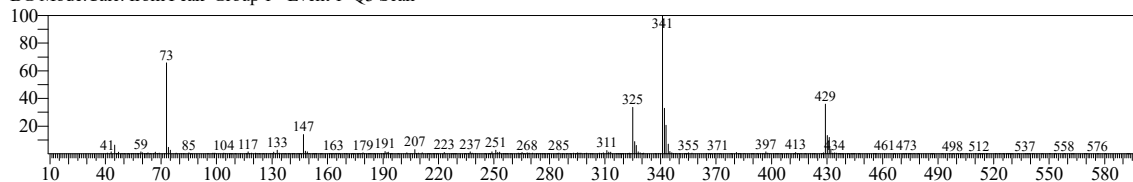

Hit#:1 Entry:42510 Library:NIST20R.lib

SI:89 Formula:C12H36O6Si6 CAS:540-97-6 MolWeight:444 RetIndex:1240

CompName:Cyclohexasiloxane, dodecamethyl- \$\$ Dodecamethylcyclohexasiloxane \$\$ 2,2,4,4,6,6,8,8,10,10,12,12-Dodecamethylcyclohexasiloxane #

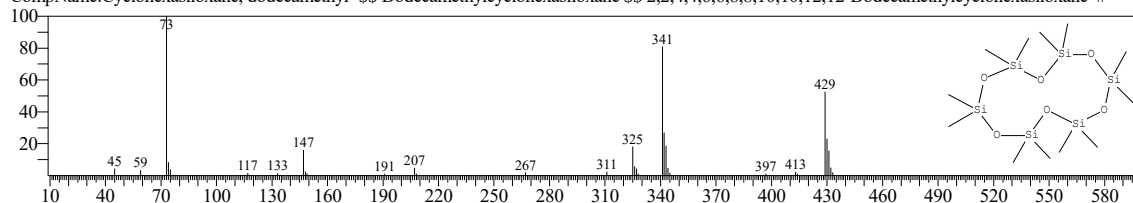

Hit#:2 Entry:225481 Library:NIST20M1.lib

SI:76 Formula:C14H32N4OSi3 CAS:0-00-0 MolWeight:356 RetIndex:1819

CompName:5-Amino-1-methyl-1H-pyrazole-4-carboxamide, 3TMS \$\$ Pyrazole-4-carboxamide, 5-amino-1-methyl-, tris(trimethylsilyl) derivative

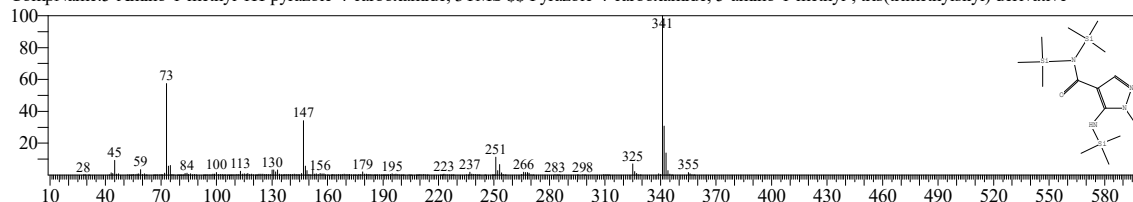

Hit#:3 Entry:210499 Library:NIST20M1.lib

SI:70 Formula:C15H31NO2Si3 CAS:0-00-0 MolWeight:341 RetIndex:1697

CompName:4-Amino-1,2-benzenediol, O,O',N-tris(trimethylsilyl)- \$\$ 4-Aminopyrocatechol, O,O',N-tris(trimethylsilyl)- \$\$ 4-Amino-1,2-benzenediol, 3TMS

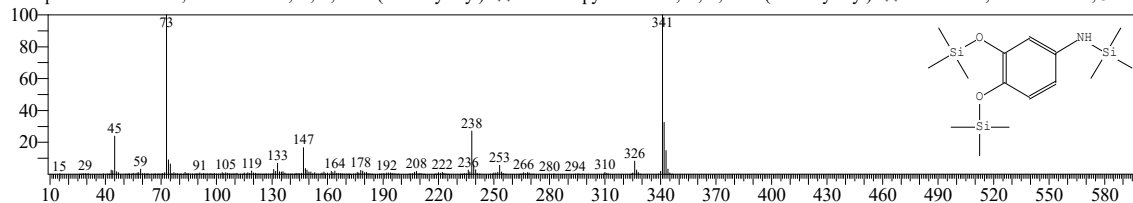

Hit#:4 Entry:332 Library:OA\_TMS\_DB5\_67min\_V3.lib

SI:56 Formula:C17H32O4Si3 CAS:451-13-8 MolWeight:384 RetIndex:1850

CompName:Homogentisic acid-3TMS ; 2-(2,5-dihydroxyphenyl)acetic acid

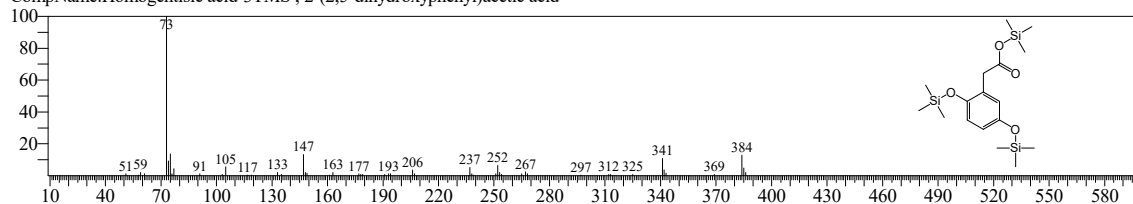

Hit#:5 Entry:402 Library:OA\_TMS\_DB5\_67min\_V3.lib

SI:52 Formula:C20H42O4Si4 CAS:775-01-9 MolWeight:458 RetIndex:1942

CompName:3,4-Dihydroxymandelic acid-4TMS ; 2-(3,4-dihydroxyphenyl)-2-hydroxyacetic acid

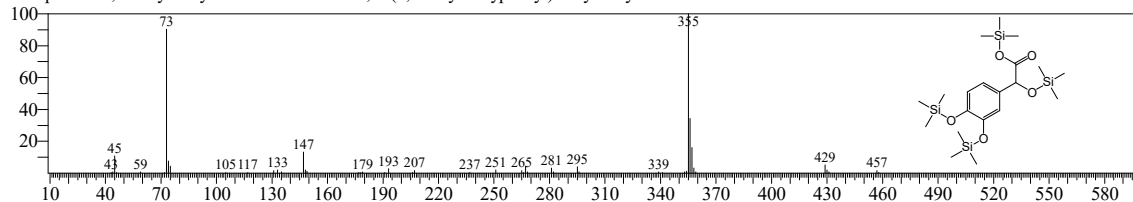

# TNAU

<< Target >>

Line#:5 R.Time:14.825(Scan#:2066) MassPeaks:329

RawMode:Averaged 14.820-14.830(2065-2067) BasePeak:44.05(445)

BG Mode:Calc. from Peak Group 1 - Event 1 Q3 Scan

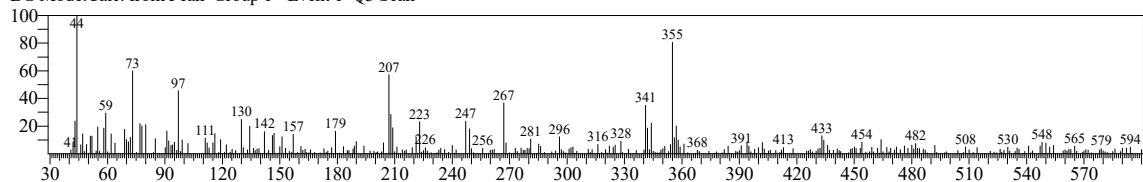

Hit#:1 Entry:402 Library:OA\_TMS\_DB5\_67min\_V3.lib

SI:41 Formula:C20H42O4Si4 CAS:775-01-9 MolWeight:458 RetIndex:1942

CompName:3,4-Dihydroxymandelic acid-4TMS ; 2-(3,4-dihydroxyphenyl)-2-hydroxyacetic acid

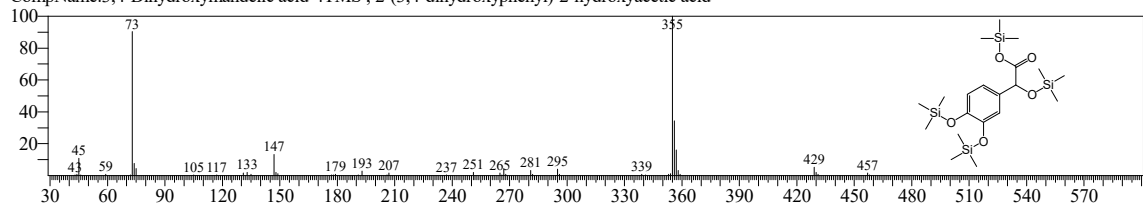

Hit#:2 Entry:343 Library:OA\_TMS\_DB5\_67min\_V3.lib

SI:41 Formula:C18H37NO3Si3 CAS:51-43-4 MolWeight:399 RetIndex:1868

CompName:Epinephrine-3TMS ; 4-[(1R)-1-hydroxy-2-(methylamino)ethyl]benzene-1,2-diol

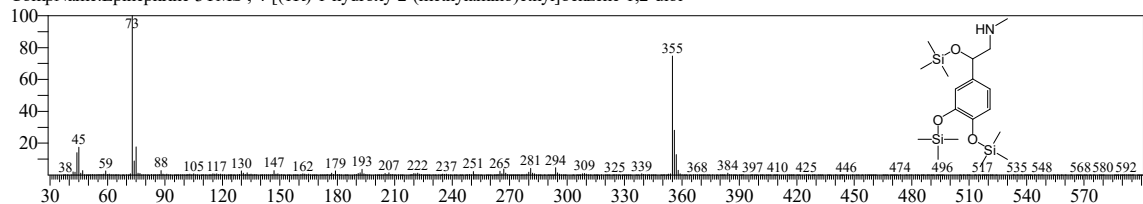

Hit#:3 Entry:211 Library:OA\_TMS\_DB5\_67min\_V3.lib

SI:33 Formula:C13H22O3Si2 CAS:99-96-7 MolWeight:282 RetIndex:1636

CompName:4-Hydroxybenzoic acid-2TMS ; 4-hydroxybenzoic acid

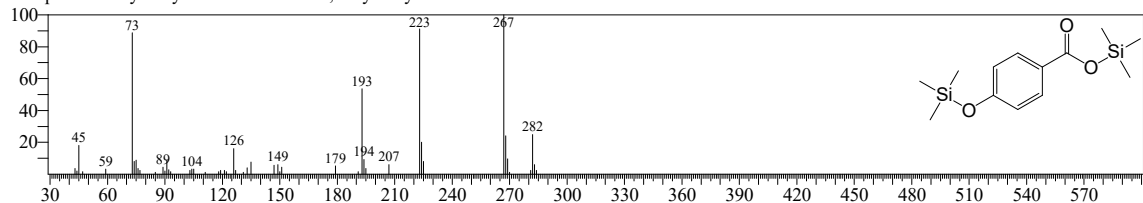

Hit#:4 Entry:20 Library:OA\_TMS\_DB5\_67min\_V3.lib

SI:33 Formula:C9H27NOSi3 CAS:7803-49-8 MolWeight:249 RetIndex:1127

CompName:Hydroxylamine-3TMS ; hydroxylamine

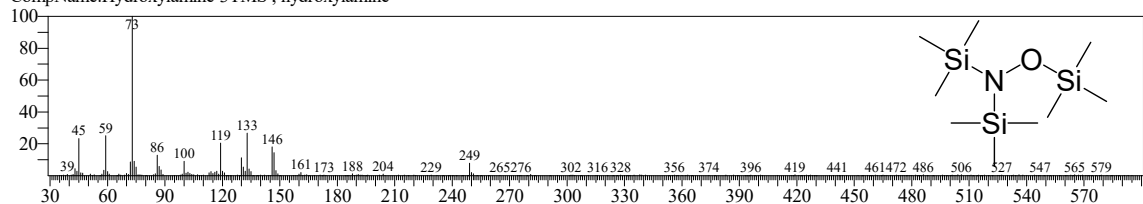

Hit#:5 Entry:119 Library:OA\_TMS\_DB5\_67min\_V3.lib

SI:33 Formula:C12H26O4Si2 CAS:626-51-7 MolWeight:290 RetIndex:1426

CompName:3-Methylglutaric acid-2TMS ; 3-methylpentanedioic acid

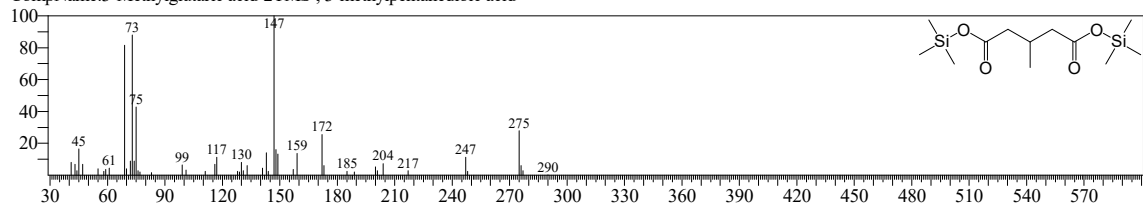

# TNAU

<< Target >>

Line#:6 R.Time:14.945(Scan#:2090) MassPeaks:402

RawMode:Averaged 14.940-14.950(2089-2091) BasePeak:281.05(51843)

BG Mode:Calc. from Peak Group 1 - Event 1 Q3 Scan

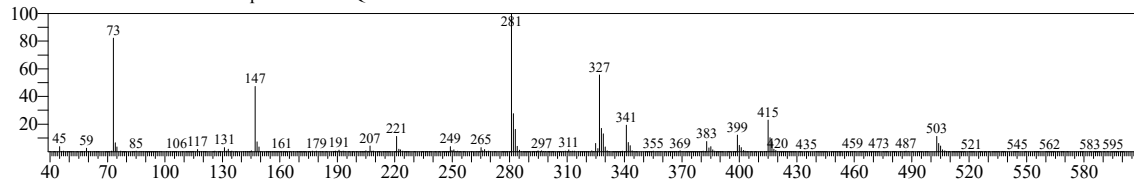

Hit#:1 Entry:43264 Library:NIST20R.lib

SI:94 Formula:C14H42O7Si7 CAS:107-50-6 MolWeight:518 RetIndex:1447

CompName:Cycloheptasiloxane, tetradecamethyl- \$ 2,2,4,4,6,6,8,8,10,10,12,12,14,14-Tetradecamethylcycloheptasiloxane # \$ Tetradecamethylcyclohept

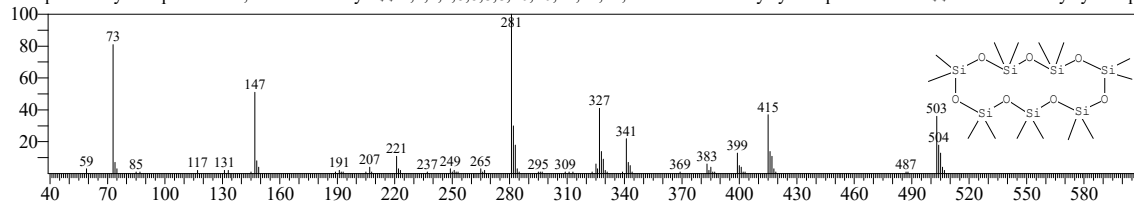

Hit#:2 Entry:41637 Library:NIST20M2.lib

SI:72 Formula:C18H52O7Si7 CAS:71579-69-6 MolWeight:576 RetIndex:1648

CompName:3-Isopropoxy-1,1,1,7,7,7-hexamethyl-3,5,5-tris(trimethylsiloxy)tetrasiloxane \$ 1-Isopropoxy-3,3,3-trimethyl-1-[(trimethylsilyl)oxy]disiloxanyl

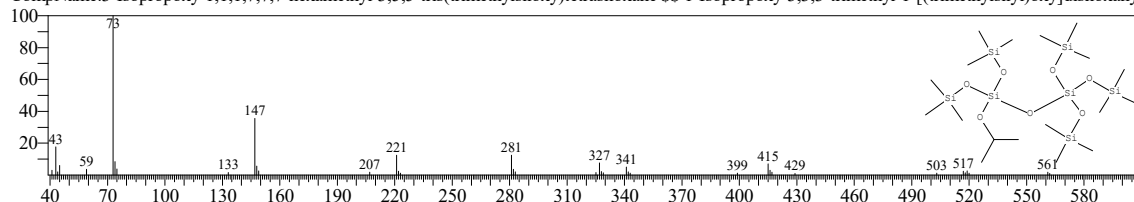

Hit#:3 Entry:184 Library:OA\_TMS\_DB5\_67min\_V3.lib

SI:48 Formula:C14H24O3Si2 CAS:614-75-5 MolWeight:296 RetIndex:1579

CompName:2-Hydroxyphenylacetic acid-2TMS ; 2-(2-hydroxyphenyl)acetic acid

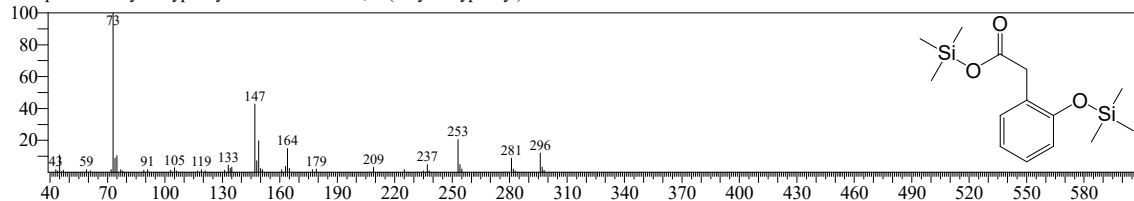

Hit#:4 Entry:247 Library:OA\_TMS\_DB5\_67min\_V3.lib

SI:47 Formula: CAS:0-00-0 MolWeight:343 RetIndex:1688

CompName:Taurine-13C2-3TMS ;

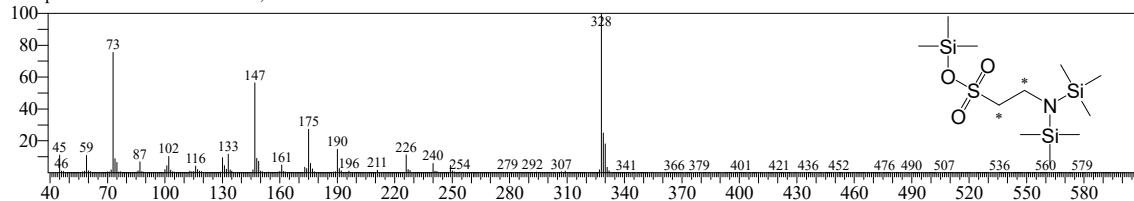

Hit#:5 Entry:200 Library:OA\_TMS\_DB5\_67min\_V3.lib

SI:46 Formula:C14H24O3Si2 CAS:621-37-4 MolWeight:296 RetIndex:1617

CompName:3-Hydroxyphenylacetic acid-2TMS ; 2-(3-hydroxyphenyl)acetic acid

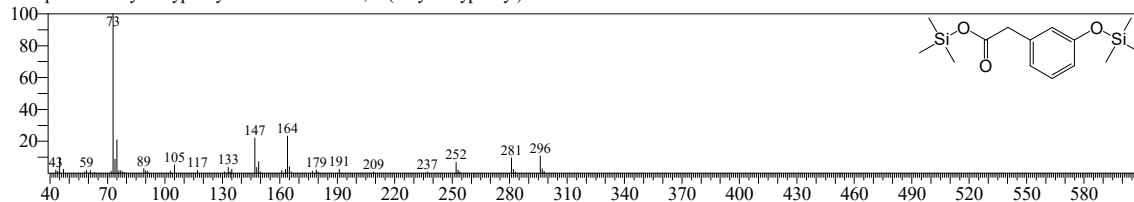



# TNAU

<< Target >>

Line#:7 R.Time:15.465(Scan#:2194) MassPeaks:326

RawMode:Averaged 15.460-15.470(2193-2195) BasePeak:191.15(13323)

BG Mode:Calc. from Peak Group 1 - Event 1 Q3 Scan

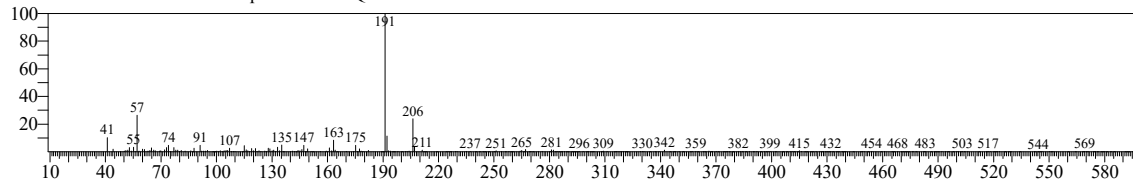

Hit#:1 Entry:24086 Library:NIST20R.lib

SI:91 Formula:C<sub>14</sub>H<sub>22</sub>O CAS:96-76-4 MolWeight:206 RetIndex:1555

CompName:2,4-Di-tert-butylphenol \$\$ Phenol, 2,4-bis(1,1-dimethylethyl)- \$\$ Phenol, 2,4-di-tert-butyl- \$\$ 2,4-di-t-Butylphenol \$\$ 1-Hydroxy-2,4-di-tert-bu

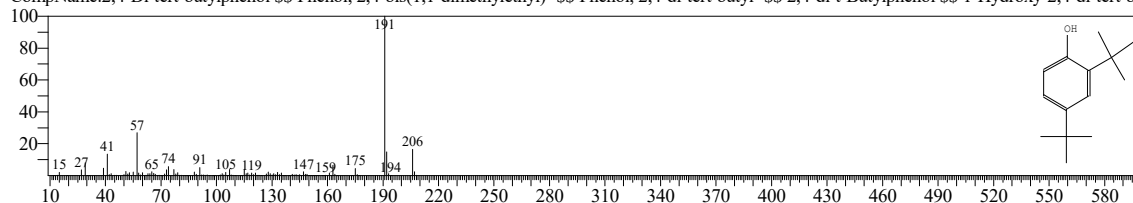

Hit#:2 Entry:24098 Library:NIST20R.lib

SI:89 Formula:C<sub>14</sub>H<sub>22</sub>O CAS:5875-45-6 MolWeight:206 RetIndex:1555

CompName:Phenol, 2,5-bis(1,1-dimethylethyl)- \$\$ Phenol, 2,5-di-tert-butyl- \$\$ 2,5-Di-tert-butylphenol \$\$ 2,5-bis(1,1-Dimethylethyl)phenol

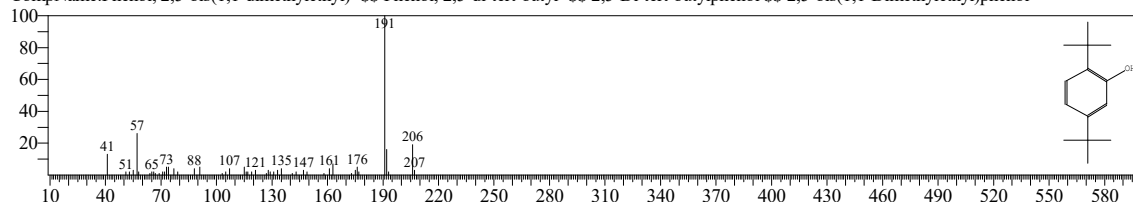

Hit#:3 Entry:59031 Library:NIST20M1.lib

SI:89 Formula:C<sub>14</sub>H<sub>22</sub>O CAS:128-39-2 MolWeight:206 RetIndex:1555

CompName:Phenol, 2,6-bis(1,1-dimethylethyl)- \$\$ Phenol, 2,6-di-tert-butyl- \$\$ 2,6-Bis(tert-butyl)phenol \$\$ 2,6-Bis(1,1-dimethylethyl)phenol \$\$ 2,6-Di-ter

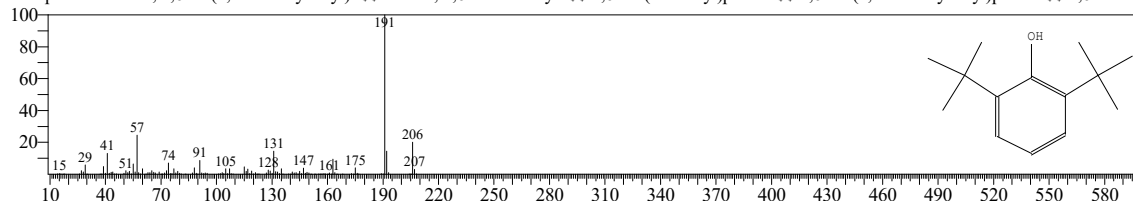

Hit#:4 Entry:24110 Library:NIST20R.lib

SI:88 Formula:C<sub>14</sub>H<sub>22</sub>O CAS:1138-52-9 MolWeight:206 RetIndex:1555

CompName:Phenol, 3,5-bis(1,1-dimethylethyl)- \$\$ Phenol, 3,5-di-tert-butyl- \$\$ 3,5-Di-tert-butylphenol \$\$ Phenol, 3,5-bis(t-butyl) \$\$ 3,5-Di-t-butylphenol \$

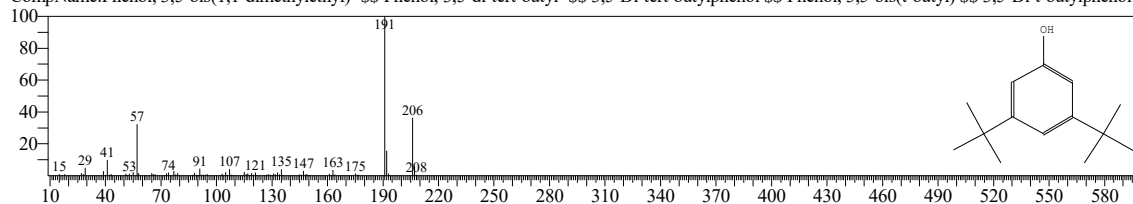

Hit#:5 Entry:103047 Library:NIST20M1.lib

SI:83 Formula:C<sub>16</sub>H<sub>24</sub>O<sub>2</sub> CAS:104316-22-5 MolWeight:248 RetIndex:1714

CompName:2,4-Di-tert-butylphenol, acetate

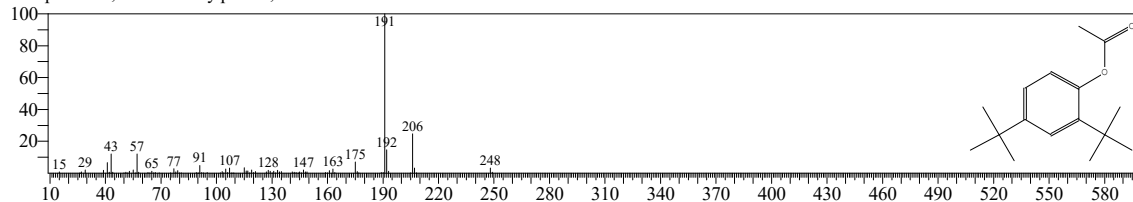

# TNAU

<< Target >>

Line#:8 R.Time:16.910(Scan#:2483) MassPeaks:386

RawMode:Averaged 16.905-16.915(2482-2484) BasePeak:355.05(46317)

BG Mode:Calc. from Peak Group 1 - Event 1 Q3 Scan

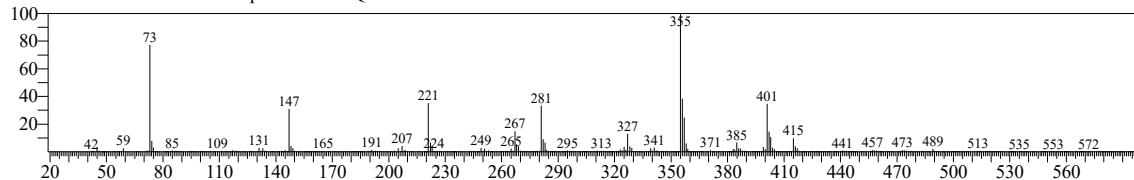

Hit#:1 Entry:42384 Library:NIST20M2.lib

SI:92 Formula:C16H48O8Si8 CAS:556-68-3 MolWeight:592 RetIndex:1654

CompName:Cyclooctasiloxane, hexadecamethyl- \$\$ Hexadecamethyl-cyclooctasiloxane \$\$ Hexadecamethylcyclooctasiloxane \$\$ 2,2,4,4,6,6,8,8,10,10,12,12

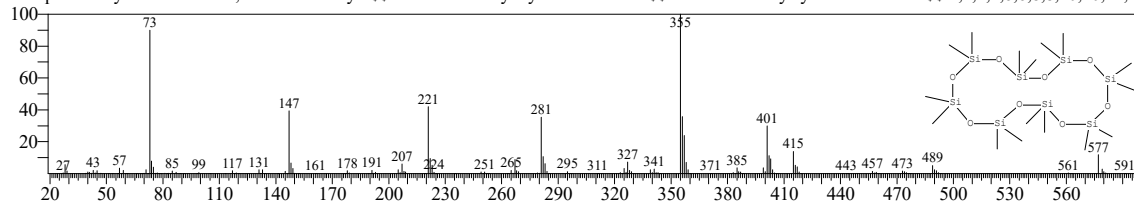

Hit#:2 Entry:238200 Library:NIST20M1.lib

SI:72 Formula:C16H30O4Si3 CAS:3782-85-2 MolWeight:370 RetIndex:1765

CompName:2,6-Dihydroxybenzoic acid, 3TMS derivative \$\$ Benzoic acid, 2,6-bis[[(trimethylsilyl)oxy]-, trimethylsilyl ester \$\$ Trimethylsilyl 2,6-bis[[(trimet

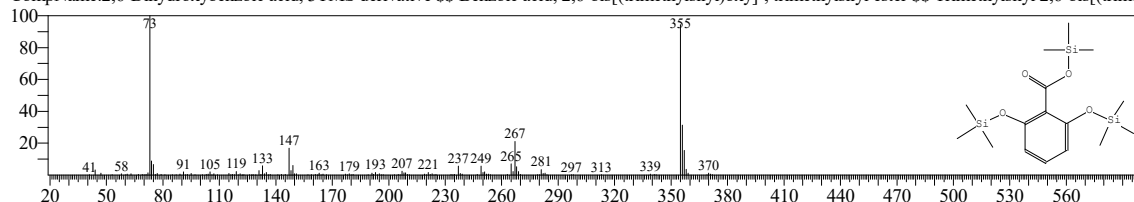

Hit#:3 Entry:42693 Library:NIST20R.lib

SI:71 Formula:C14H42O5Si6 CAS:107-52-8 MolWeight:458 RetIndex:1252

CompName:Hexasiloxane, tetradecamethyl- \$\$ Tetradecamethylhexasiloxane \$\$ 1,1,1,3,3,5,5,7,7,9,9,11,11,11-Tetradecamethylhexasiloxane #

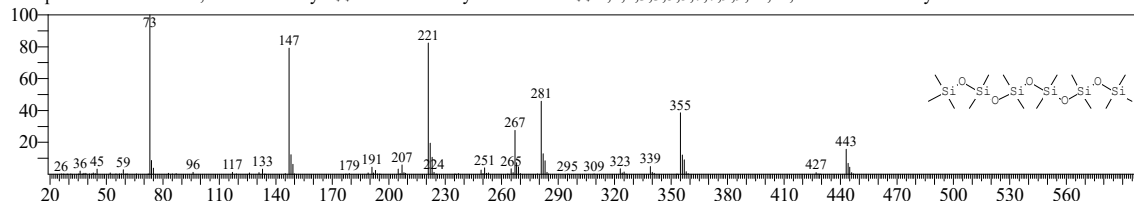

Hit#:4 Entry:42703 Library:NIST20R.lib

SI:71 Formula:C20H42O4Si4 CAS:56114-62-6 MolWeight:458 RetIndex:1993

CompName:3,4-Dihydroxyphenylglycol, 4TMS derivative \$\$ Silane, [[4-[1,2-bis[[(trimethylsilyl)oxy]ethyl]-1,2-phenylene]bis(oxy)]bis[trimethyl-

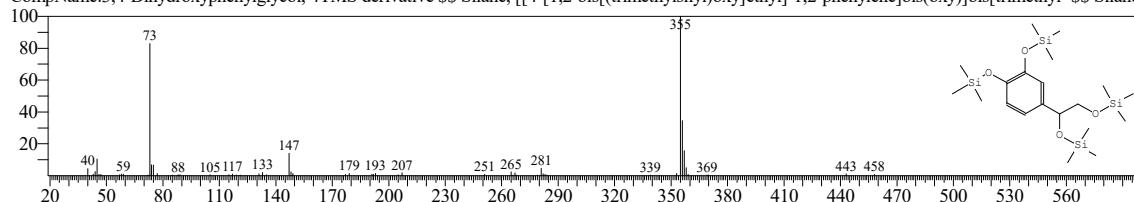

Hit#:5 Entry:402 Library:OA TMS DB5 67min V3.lib

SI:70 Formula:C20H42O4Si4 CAS:775-01-9 MolWeight:458 RetIndex:1942

CompName:3,4-Dihydroxymandelic acid-4TMS ; 2-(3,4-dihydroxyphenyl)-2-hydroxyacetic acid

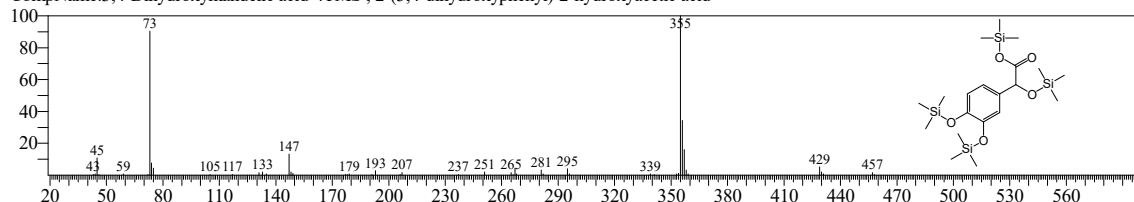

# TNAU

<< Target >>

Line#9 R.Time:18.600(Scan#:2821) MassPeaks:377

RawMode:Averaged 18.595-18.605(2820-2822) BasePeak:73.05(27233)

BG Mode:Calc. from Peak Group 1 - Event 1 Q3 Scan

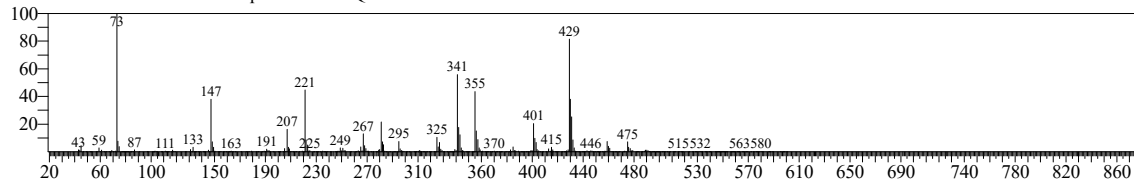

Hit#:1 Entry:43659 Library:NIST20R.lib

SI:91 Formula:C18H54O9Si9 CAS:556-71-8 MolWeight:666 RetIndex:1860

CompName:Cyclononasiloxane, octadecamethyl- \$\$ Octadecamethyl-cyclononasiloxane \$\$ 2,2,4,4,6,6,8,8,10,10,12,12,14,14,16,16,18,18-Octadecamethylc

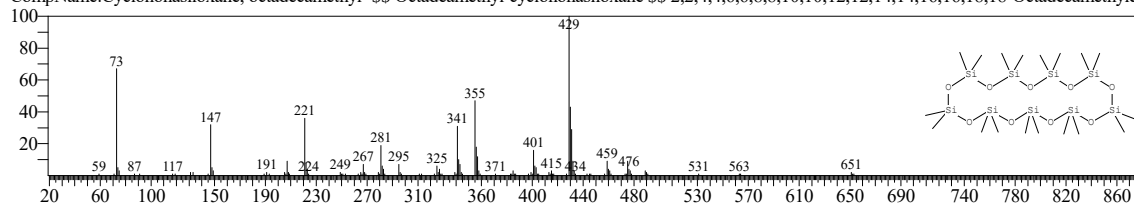

Hit#:2 Entry:45685 Library:NIST20M2.lib

SI:76 Formula:C20H60O10Si10 CAS:18772-36-6 MolWeight:740 RetIndex:2067

CompName:Cyclodecasiloxane, eicosamethyl- \$\$ 2,2,4,4,6,6,8,8,10,10,12,12,14,14,16,16,18,18,20,20-Icosamethylcyclodecasiloxane # \$\$ Eicosamethyl-cy

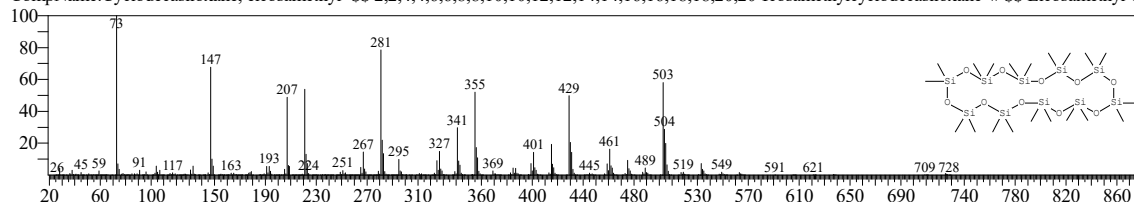

Hit#:3 Entry:38404 Library:NIST20M2.lib

SI:74 Formula:C16H48O6Si7 CAS:541-01-5 MolWeight:532 RetIndex:1437

CompName:Heptasiloxane, hexadecamethyl- \$\$ Hexadecamethylheptasiloxane \$\$ 1,1,1,3,3,5,5,7,7,9,9,11,11,13,13,13-Hexadecamethylheptasiloxane #

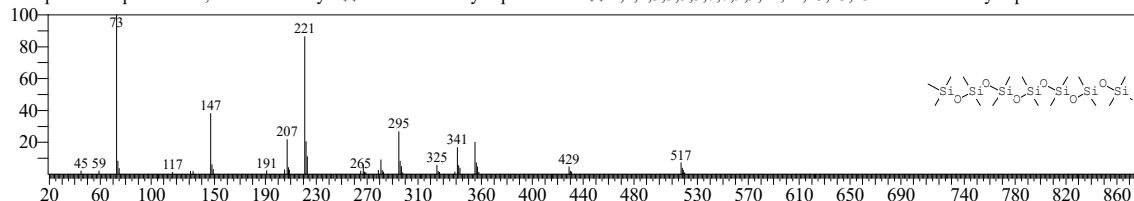

Hit#:4 Entry:46368 Library:NIST20M2.lib

SI:74 Formula:C24H72O12Si12 CAS:18919-94-3 MolWeight:888 RetIndex:2480

CompName:Tetracosamethyl-cyclododecasiloxane \$\$ 2,2,4,4,6,6,8,8,10,10,12,12,14,14,16,16,18,18,20,20,22,22,24,24-Tetracosamethylcyclododecasiloxan

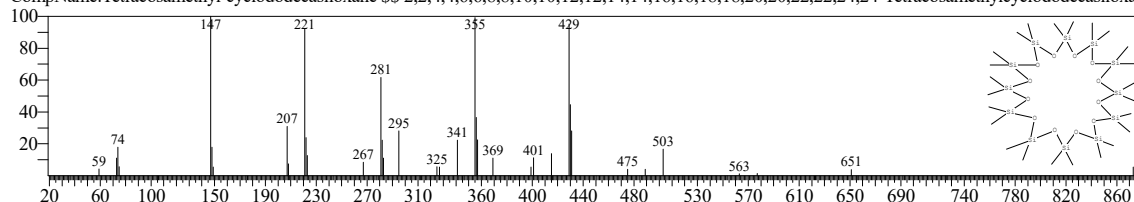

Hit#:5 Entry:20636 Library:NIST20M2.lib

SI:73 Formula:C13H40O5Si6 CAS:38147-00-1 MolWeight:444 RetIndex:1297

CompName:1,1,1,5,7,7,7-Heptamethyl-3,3-bis(trimethylsiloxy)tetrasiloxane \$\$ 1,3,3,3-Tetramethyldisiloxanyl tris(trimethylsilyl) orthosilicate #

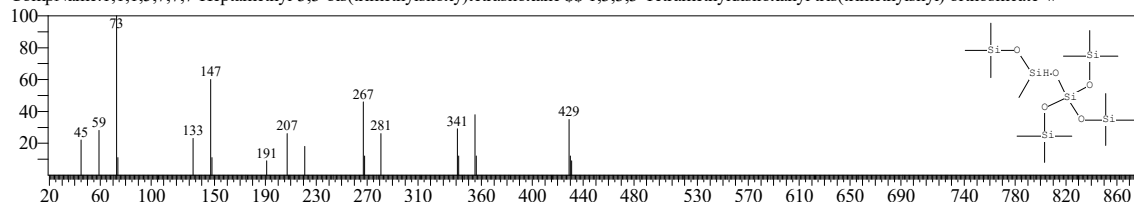

# TNAU

<< Target >>

Line#:10 R.Time:20.105(Scan#:3122) MassPeaks:359

RawMode:Averaged 20.100-20.110(3121-3123) BasePeak:73.05(18784)

BG Mode:Calc. from Peak Group 1 - Event 1 Q3 Scan

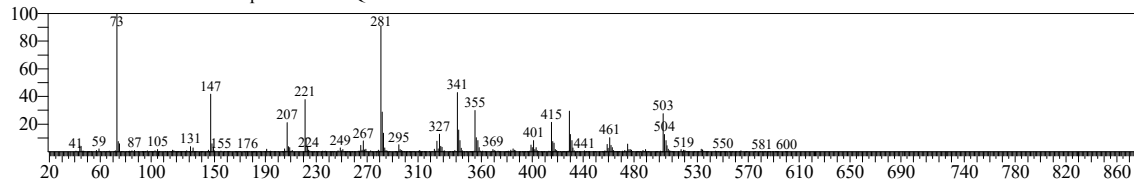

Hit#:1 Entry:45685 Library:NIST20M2.lib

SI:87 Formula:C20H60O10Si10 CAS:18772-36-6 MolWeight:740 RetIndex:2067

CompName:Cyclodecasiloxane, eicosamethyl- \$\$ 2,2,4,4,6,6,8,8,10,10,12,12,14,14,16,16,18,18,20,20-Icosamethylcyclodecasiloxane # \$\$ Eicosamethyl-cy

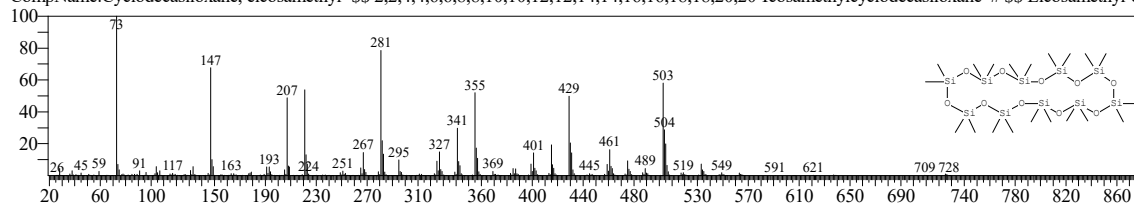

Hit#:2 Entry:36969 Library:NIST20M2.lib

SI:79 Formula:C14H42O7Si7 CAS:107-50-6 MolWeight:518 RetIndex:1447

CompName:Cycloheptasiloxane, tetradecamethyl- \$\$ 2,2,4,4,6,6,8,8,10,10,12,12,14,14-Tetradecamethylcycloheptasiloxane # \$\$ Tetradecamethylcyclohept

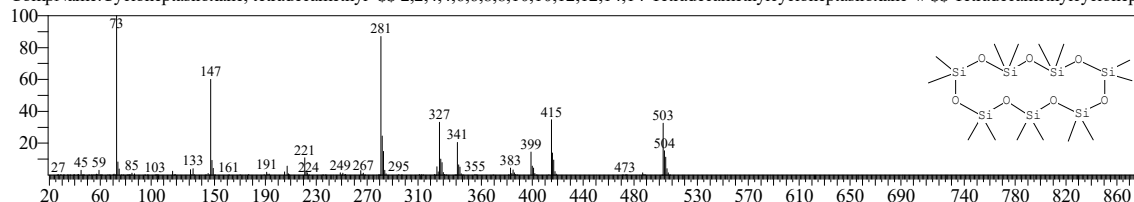

Hit#:3 Entry:44570 Library:NIST20M2.lib

SI:77 Formula:C18H54O9Si9 CAS:556-71-8 MolWeight:666 RetIndex:1860

CompName:Cyclononasiloxane, octadecamethyl- \$\$ Octadecamethyl-cyclononasiloxane \$\$ 2,2,4,4,6,6,8,8,10,10,12,12,14,14,16,16,18,18-Octadecamethylcy

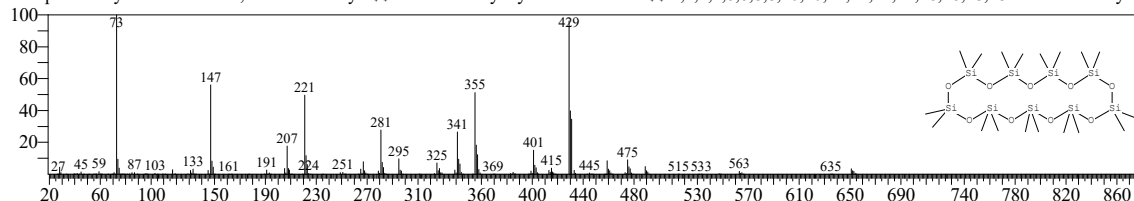

Hit#:4 Entry:46368 Library:NIST20M2.lib

SI:72 Formula:C24H72O12Si12 CAS:18919-94-3 MolWeight:888 RetIndex:2480

CompName:Tetracosamethyl-cyclododecasiloxane \$\$ 2,2,4,4,6,6,8,8,10,10,12,12,14,14,16,16,18,18,20,20,22,22,24,24-Tetracosamethylcyclododecasiloxan



Hit#:5 Entry:402 Library:OA TMS DB5 67min V3.lib

SI:56 Formula:C20H42O4Si4 CAS:775-01-9 MolWeight:458 RetIndex:1942

CompName:3,4-Dihydroxymandelic acid-4TMS ; 2-(3,4-dihydroxyphenyl)-2-hydroxyacetic acid

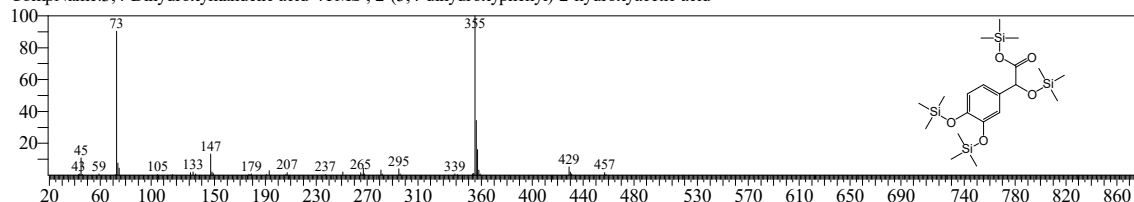

# TNAU

<< Target >>

Line#:11 R.Time:21.480(Scan#:3397) MassPeaks:373

RawMode:Averaged 21.475-21.485(3396-3398) BasePeak:355.05(16585)

BG Mode:Calc. from Peak Group 1 - Event 1 Q3 Scan

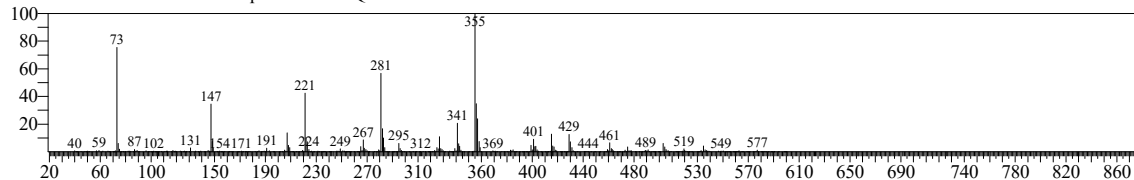

Hit#:1 Entry:42384 Library:NIST20M2.lib

SI:85 Formula:C<sub>16</sub>H<sub>48</sub>O<sub>8</sub>Si<sub>8</sub> CAS:556-68-3 MolWeight:592 RetIndex:1654

CompName:Cyclooctasiloxane, hexadecamethyl- \$\$ Hexadecamethyl-cyclooctasiloxane \$\$ Hexadecamethylcyclooctasiloxane \$\$ 2,2,4,4,6,6,8,8,10,10,12,12

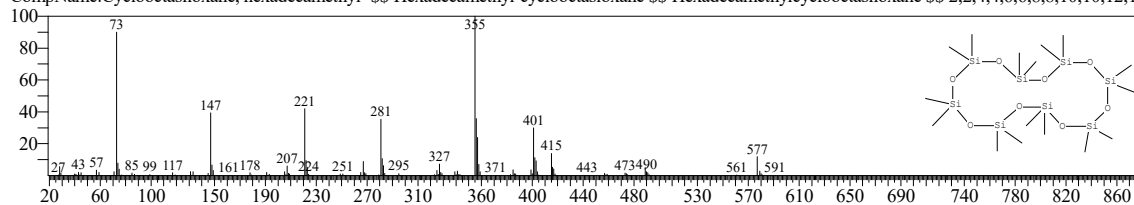

Hit#:2 Entry:45685 Library:NIST20M2.lib

SI:80 Formula:C<sub>20</sub>H<sub>60</sub>O<sub>10</sub>Si<sub>10</sub> CAS:18772-36-6 MolWeight:740 RetIndex:2067

CompName:Cyclodecasiloxane, eicosamethyl- \$\$ 2,2,4,4,6,6,8,8,10,10,12,12,14,14,16,16,18,18,20,20-Icosamethylcyclodecasiloxane # \$\$ Eicosamethyl-cy

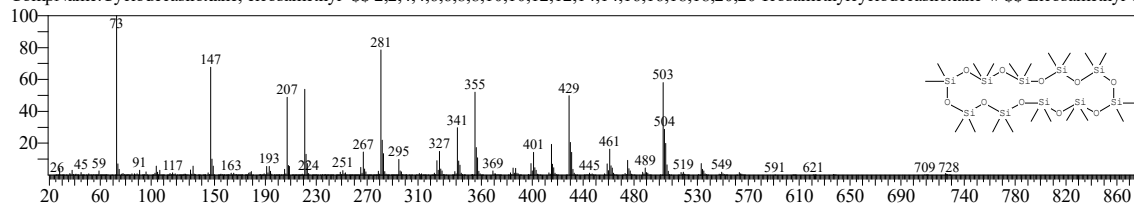

Hit#:3 Entry:44570 Library:NIST20M2.lib

SI:79 Formula:C<sub>18</sub>H<sub>54</sub>O<sub>9</sub>Si<sub>9</sub> CAS:556-71-8 MolWeight:666 RetIndex:1860

CompName:Cyclononasiloxane, octadecamethyl- \$\$ Octadecamethyl-cyclononasiloxane \$\$ 2,2,4,4,6,6,8,8,10,10,12,12,14,14,16,16,18,18-Octadecamethylcy

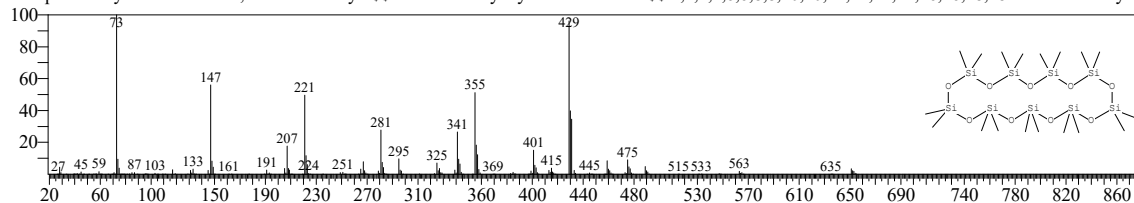

Hit#:4 Entry:46368 Library:NIST20M2.lib

SI:78 Formula:C<sub>24</sub>H<sub>72</sub>O<sub>12</sub>Si<sub>12</sub> CAS:18919-94-3 MolWeight:888 RetIndex:2480

CompName:Tetracosamethyl-cyclododecasiloxane \$\$ 2,2,4,4,6,6,8,8,10,10,12,12,14,14,16,16,18,18,20,20,22,22,24,24-Tetracosamethylcyclododecasiloxan

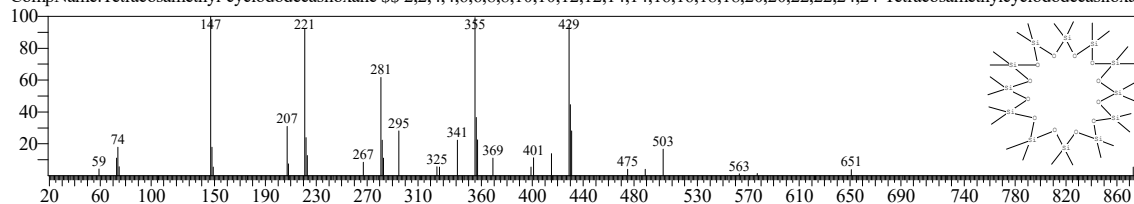

Hit#:5 Entry:43312 Library:NIST20R.lib

SI:73 Formula:C<sub>16</sub>H<sub>48</sub>O<sub>6</sub>Si<sub>7</sub> CAS:541-01-5 MolWeight:532 RetIndex:1437

CompName:Heptasiloxane, hexadecamethyl- \$\$ Hexadecamethylheptasiloxane \$\$ 1,1,1,3,3,5,5,7,7,9,9,11,11,13,13,13-Hexadecamethylheptasiloxane #

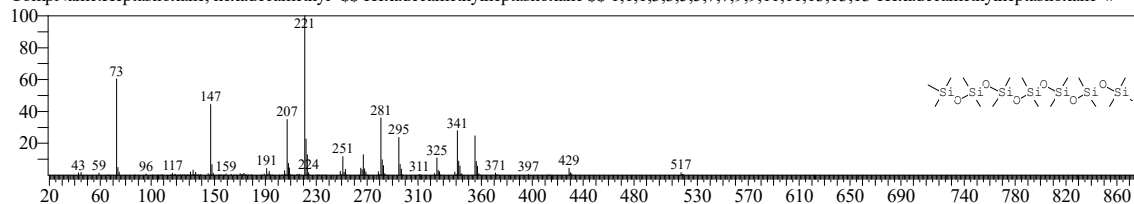

# TNAU

<< Target >>

Line#:12 R.Time:22.725(Scan#:3646) MassPeaks:388

RawMode:Averaged 22.720-22.730(3645-3647) BasePeak:73.05(10692)

BG Mode:Calc. from Peak Group 1 - Event 1 Q3 Scan

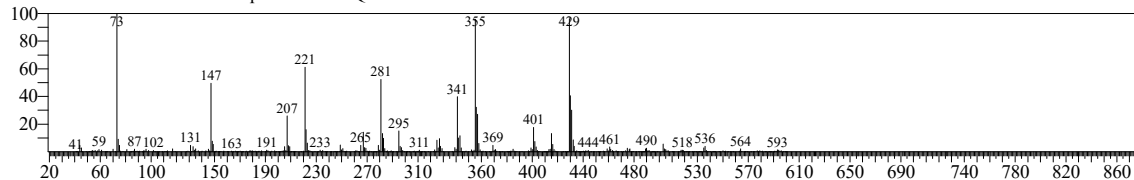

Hit#:1 Entry:44570 Library:NIST20M2.lib

SI:87 Formula:C18H54O9Si9 CAS:556-71-8 MolWeight:666 RetIndex:1860

CompName:Cyclononasiloxane, octadecamethyl- \$\$ Octadecamethyl-cyclononasiloxane \$\$ 2,2,4,4,6,6,8,8,10,10,12,12,14,14,16,16,18,18-Octadecamethyl-

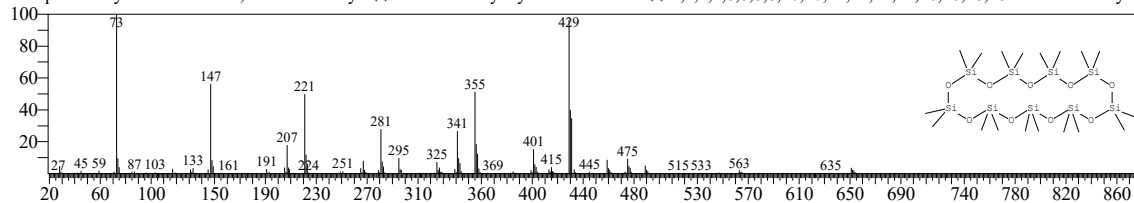

Hit#:2 Entry:46368 Library:NIST20M2.lib

SI:83 Formula:C24H72O12Si12 CAS:18919-94-3 MolWeight:888 RetIndex:2480

CompName:Tetracosamethyl-cyclododecasiloxane \$\$ 2,2,4,4,6,6,8,8,10,10,12,12,14,14,16,16,18,18,20,20,22,22,24,24-Tetracosamethylcyclododecasiloxane

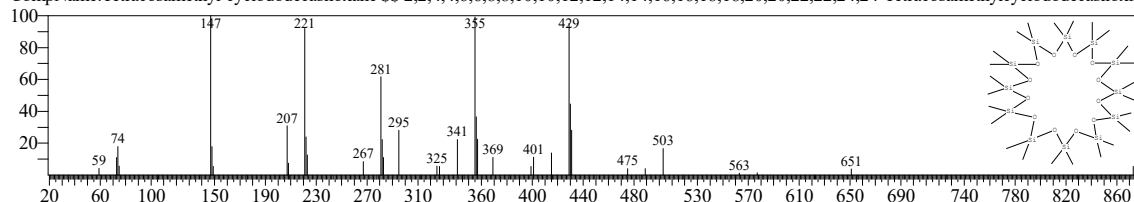

Hit#:3 Entry:45685 Library:NIST20M2.lib

SI:80 Formula:C20H60O10Si10 CAS:18772-36-6 MolWeight:740 RetIndex:2067

CompName:Cyclodecasiloxane, eicosamethyl- \$\$ 2,2,4,4,6,6,8,8,10,10,12,12,14,14,16,16,18,18,20,20-Icosamethylcyclodecasiloxane # \$\$ Eicosamethyl-cy

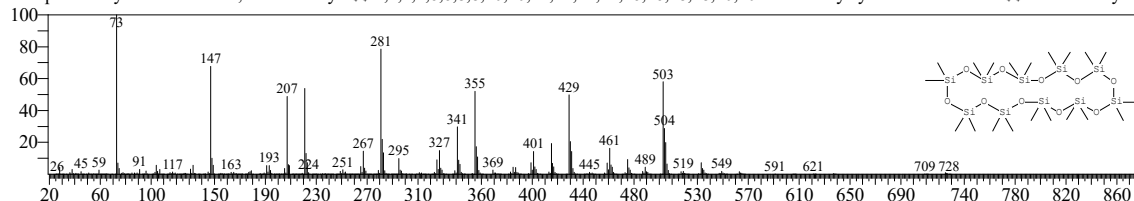

Hit#:4 Entry:38404 Library:NIST20M2.lib

SI:74 Formula:C16H48O6Si7 CAS:541-01-5 MolWeight:532 RetIndex:1437

CompName:Heptasiloxane, hexadecamethyl- \$\$ Hexadecamethylheptasiloxane \$\$ 1,1,1,3,3,5,5,7,7,9,9,11,11,13,13,13-Hexadecamethylheptasiloxane #

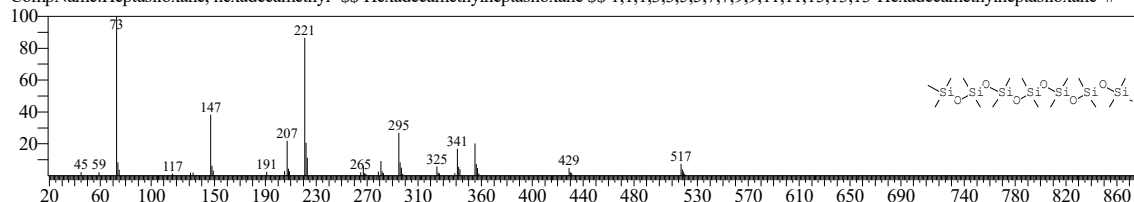

Hit#:5 Entry:42384 Library:NIST20M2.lib

SI:73 Formula:C16H48O8Si8 CAS:556-68-3 MolWeight:592 RetIndex:1654

CompName:Cyclooctasiloxane, hexadecamethyl- \$\$ Hexadecamethyl-cyclooctasiloxane \$\$ Hexadecamethylcyclooctasiloxane \$\$ 2,2,4,4,6,6,8,8,10,10,12,12

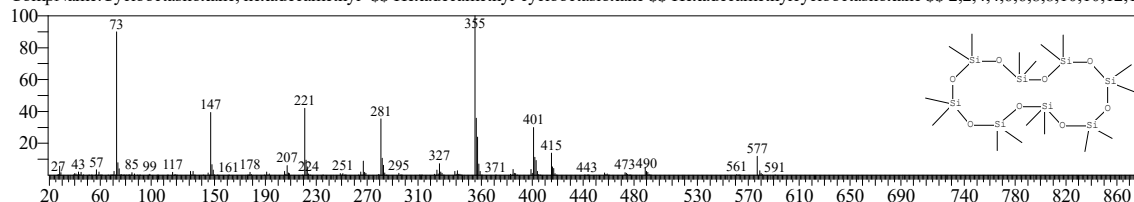

# TNAU

<< Target >>

Line#:13 R.Time:23.875(Scan#:3876) MassPeaks:342

RawMode:Averaged 23.870-23.880(3875-3877) BasePeak:73.05(9606)

BG Mode:Calc. from Peak Group 1 - Event 1 Q3 Scan

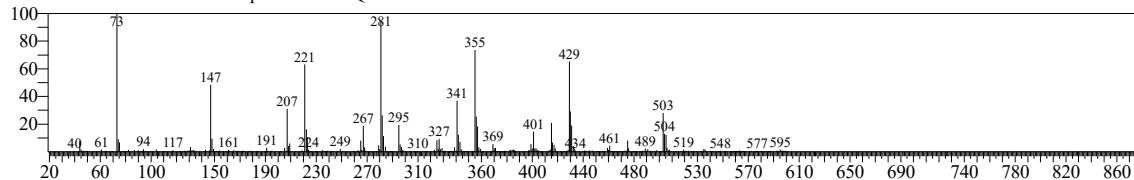

Hit#:1 Entry:45685 Library:NIST20M2.lib

SI:87 Formula:C20H60O10Si10 CAS:18772-36-6 MolWeight:740 RetIndex:2067

CompName:Cyclodecasiloxane, eicosamethyl- \$\$ 2,2,4,4,6,6,8,8,10,10,12,12,14,14,16,16,18,18,20,20-Icosamethylcyclodecasiloxane # \$\$ Eicosamethyl-cy



Hit#:2 Entry:46368 Library:NIST20M2.lib

SI:81 Formula:C24H72O12Si12 CAS:18919-94-3 MolWeight:888 RetIndex:2480

CompName:Tetracosamethyl-cyclodecasiloxane \$\$ 2,2,4,4,6,6,8,8,10,10,12,12,14,14,16,16,18,18,20,20,22,22,24,24-Tetracosamethylcyclodecasiloxane



Hit#:3 Entry:44570 Library:NIST20M2.lib

SI:81 Formula:C18H54O9Si9 CAS:556-71-8 MolWeight:666 RetIndex:1860

CompName:Cyclononasiloxane, octadecamethyl- \$\$ Octadecamethyl-cyclononasiloxane \$\$ 2,2,4,4,6,6,8,8,10,10,12,12,14,14,16,16,18,18-Octadecamethylcy



Hit#:4 Entry:43312 Library:NIST20R.lib

SI:73 Formula:C16H48O6Si7 CAS:541-01-5 MolWeight:532 RetIndex:1437

CompName:Heptasiloxane, hexadecamethyl- \$\$ Hexadecamethylheptasiloxane \$\$ 1,1,1,3,3,5,5,7,7,9,9,11,11,13,13,13-Hexadecamethylheptasiloxane #

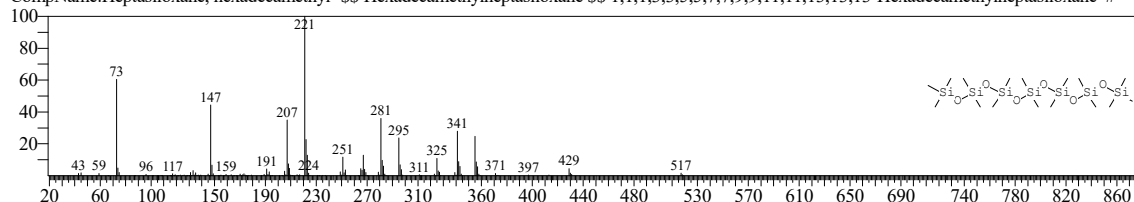

Hit#:5 Entry:42942 Library:NIST20M2.lib

SI:72 Formula:C18H54O7Si8 CAS:556-69-4 MolWeight:606 RetIndex:1622

CompName:1,1,1,3,3,5,5,7,7,9,9,11,11,13,13,15,15-octadecamethyloctasiloxane \$\$ Polydimethylsilane Oil

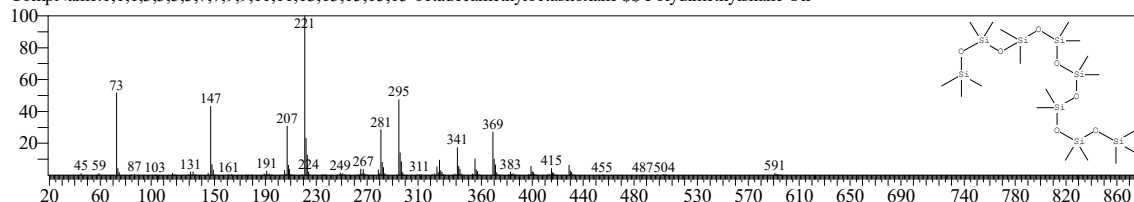

# TNAU

<< Target >>

Line#:14 R.Time:24.955(Scan#:4092) MassPeaks:335

RawMode:Averaged 24.950-24.960(4091-4093) BasePeak:355.05(8728)

BG Mode:Calc. from Peak Group 1 - Event 1 Q3 Scan

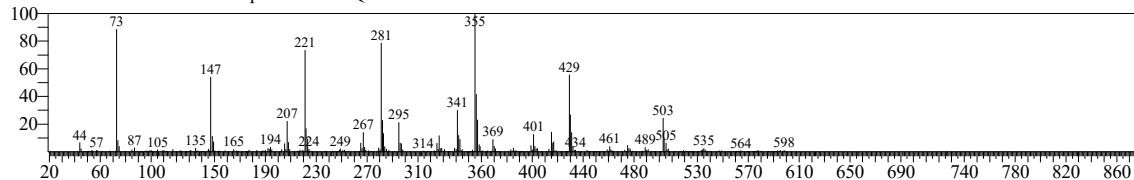

Hit#:1 Entry:45685 Library:NIST20M2.lib

SI:86 Formula:C20H60O10Si10 CAS:18772-36-6 MolWeight:740 RetIndex:2067

CompName:Cyclodecasiloxane, eicosamethyl- \$\$ 2,2,4,4,6,6,8,8,10,10,12,12,14,14,16,16,18,18,20,20-Icosamethylcyclodecasiloxane # \$\$ Eicosamethyl-cy



Hit#:2 Entry:46368 Library:NIST20M2.lib

SI:84 Formula:C24H72O12Si12 CAS:18919-94-3 MolWeight:888 RetIndex:2480

CompName:Tetracosamethyl-cyclodecasiloxane \$\$ 2,2,4,4,6,6,8,8,10,10,12,12,14,14,16,16,18,18,20,20,22,22,24,24-Tetracosamethylcyclodecasiloxane



Hit#:3 Entry:44570 Library:NIST20M2.lib

SI:80 Formula:C18H54O9Si9 CAS:556-71-8 MolWeight:666 RetIndex:1860

CompName:Cyclononasiloxane, octadecamethyl- \$\$ Octadecamethyl-cyclononasiloxane \$\$ 2,2,4,4,6,6,8,8,10,10,12,12,14,14,16,16,18,18-Octadecamethylcy



Hit#:4 Entry:42942 Library:NIST20M2.lib

SI:74 Formula:C18H54O7Si8 CAS:556-69-4 MolWeight:606 RetIndex:1622

CompName:1,1,1,3,3,5,5,7,7,9,9,11,11,13,13,15,15,15-octadecamethyloctasiloxane \$\$ Polydimethylsilane Oil

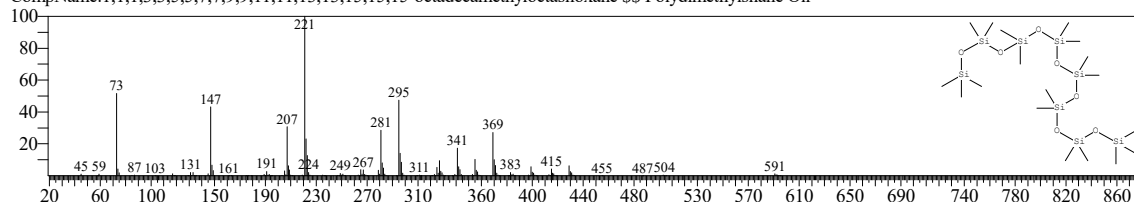

Hit#:5 Entry:42384 Library:NIST20M2.lib

SI:73 Formula:C16H48O8Si8 CAS:556-68-3 MolWeight:592 RetIndex:1654

CompName:Cyclooctasiloxane, hexadecamethyl- \$\$ Hexadecamethyl-cyclooctasiloxane \$\$ Hexadecamethylcyclooctasiloxane \$\$ 2,2,4,4,6,6,8,8,10,10,12,12





# TNAU

<< Target >>

Line#:15 R.Time:25.975(Scan#:4296) MassPeaks:325

RawMode:Averaged 25.970-25.980(4295-4297) BasePeak:429.10(8038)

BG Mode:Calc. from Peak Group 1 - Event 1 Q3 Scan

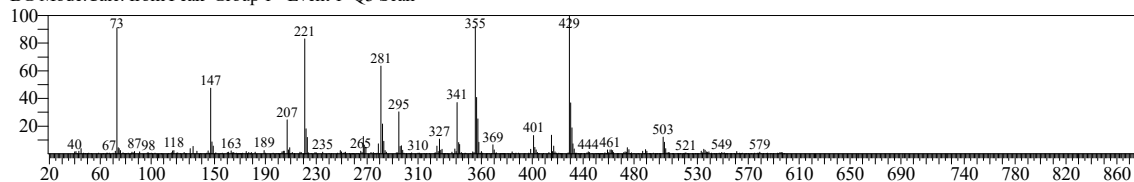

Hit#:1 Entry:46368 Library:NIST20M2.lib

SI:85 Formula:C<sub>24</sub>H<sub>72</sub>O<sub>12</sub>Si<sub>12</sub> CAS:18919-94-3 MolWeight:888 RetIndex:2480

CompName:Tetracosamethylcyclododecasiloxane \$ \$ 2,2,4,4,6,6,8,8,10,10,12,12,14,14,16,16,18,18,20,20,22,22,24,24-Tetracosamethylcyclododecasiloxane

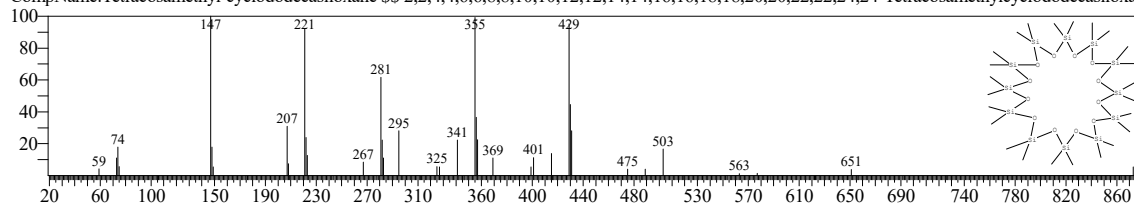

Hit#:2 Entry:44570 Library:NIST20M2.lib

SI:83 Formula:C<sub>18</sub>H<sub>54</sub>O<sub>9</sub>Si<sub>9</sub> CAS:556-71-8 MolWeight:666 RetIndex:1860

CompName:Cyclononasiloxane, octadecamethyl- \$ \$ Octadecamethyl-cyclononasiloxane \$ \$ 2,2,4,4,6,6,8,8,10,10,12,12,14,14,16,16,18,18-Octadecamethyle

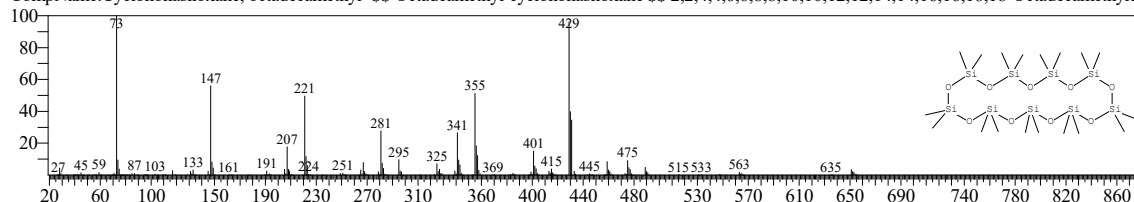

Hit#:3 Entry:45685 Library:NIST20M2.lib

SI:81 Formula:C<sub>20</sub>H<sub>60</sub>O<sub>10</sub>Si<sub>10</sub> CAS:18772-36-6 MolWeight:740 RetIndex:2067

CompName:Cyclodecasiloxane, eicosamethyl- \$ \$ 2,2,4,4,6,6,8,8,10,10,12,12,14,14,16,16,18,18,20,20-Icosamethylcyclodecasiloxane # \$ \$ Eicosamethyl-cy



Hit#:4 Entry:38404 Library:NIST20M2.lib

SI:75 Formula:C<sub>16</sub>H<sub>48</sub>O<sub>6</sub>Si<sub>7</sub> CAS:541-01-5 MolWeight:532 RetIndex:1437

CompName:Heptasiloxane, hexadecamethyl- \$ \$ Hexadecamethylheptasiloxane \$ \$ 1,1,1,3,3,5,5,7,7,9,9,11,11,13,13,13-Hexadecamethylheptasiloxane #

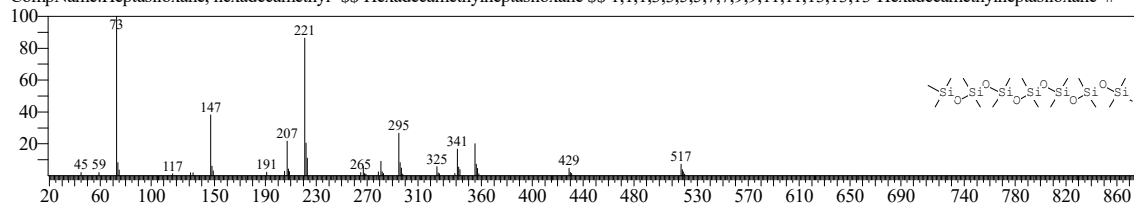

Hit#:5 Entry:42942 Library:NIST20M2.lib

SI:74 Formula:C<sub>18</sub>H<sub>54</sub>O<sub>7</sub>Si<sub>8</sub> CAS:556-69-4 MolWeight:606 RetIndex:1622

CompName:1,1,1,3,3,5,5,7,7,9,9,11,11,13,13,15,15-octadecamethyloctasiloxane \$ \$ Polydimethylsilane Oil

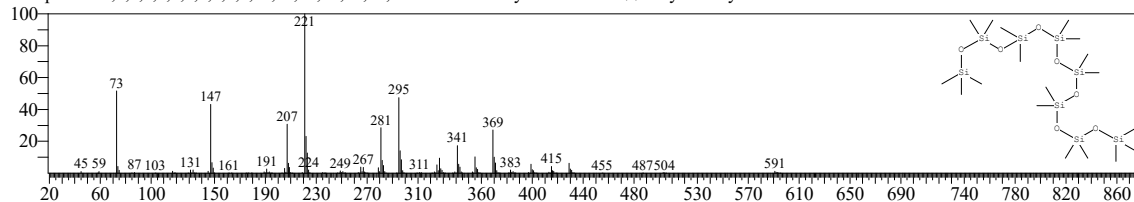

# TNAU

<< Target >>

Line#:16 R.Time:26.930(Scan#:4487) MassPeaks:331

RawMode:Averaged 26.925-26.935(4486-4488) BasePeak:355.05(6270)

BG Mode:Calc. from Peak Group 1 - Event 1 Q3 Scan

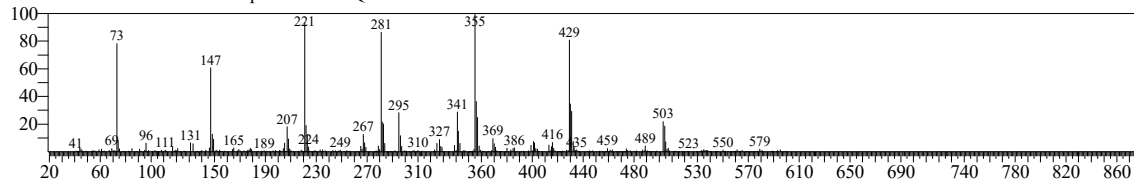

Hit#:1 Entry:46368 Library:NIST20M2.lib

SI:84 Formula:C<sub>24</sub>H<sub>72</sub>O<sub>12</sub>Si<sub>12</sub> CAS:18919-94-3 MolWeight:888 RetIndex:2480

CompName:Tetracosamethyl-cyclododecasiloxane \$\$ 2,2,4,4,6,6,8,8,10,10,12,12,14,14,16,16,18,18,20,20,22,22,24,24-Tetracosamethylcyclododecasiloxane



Hit#:2 Entry:45685 Library:NIST20M2.lib

SI:81 Formula:C<sub>20</sub>H<sub>60</sub>O<sub>10</sub>Si<sub>10</sub> CAS:18772-36-6 MolWeight:740 RetIndex:2067

CompName:Cyclodecasiloxane, eicosamethyl- \$\$ 2,2,4,4,6,6,8,8,10,10,12,12,14,14,16,16,18,18,20,20-Icosamethylcyclodecasiloxane # \$\$ Eicosamethyl-cyclodecasiloxane



Hit#:3 Entry:44570 Library:NIST20M2.lib

SI:80 Formula:C<sub>18</sub>H<sub>54</sub>O<sub>9</sub>Si<sub>9</sub> CAS:556-71-8 MolWeight:666 RetIndex:1860

CompName:Cyclononasiloxane, octadecamethyl- \$\$ Octadecamethyl-cyclononasiloxane \$\$ 2,2,4,4,6,6,8,8,10,10,12,12,14,14,16,16,18,18-Octadecamethylcyclononasiloxane



Hit#:4 Entry:42942 Library:NIST20M2.lib

SI:74 Formula:C<sub>18</sub>H<sub>54</sub>O<sub>7</sub>Si<sub>8</sub> CAS:556-69-4 MolWeight:606 RetIndex:1622

CompName:1,1,1,3,3,5,5,7,7,9,9,11,11,13,13,15,15,15-octadecamethyloctasiloxane \$\$ Polydimethylsilane Oil



Hit#:5 Entry:43312 Library:NIST20R.lib

SI:73 Formula:C<sub>16</sub>H<sub>48</sub>O<sub>6</sub>Si<sub>7</sub> CAS:541-01-5 MolWeight:532 RetIndex:1437

CompName:Heptasiloxane, hexadecamethyl- \$\$ Hexadecamethylheptasiloxane \$\$ 1,1,1,3,3,5,5,7,7,9,9,11,11,13,13,13-Hexadecamethylheptasiloxane #



# TNAU

<< Target >>

Line#:17 R.Time:27.820(Scan#:4665) MassPeaks:314

RawMode:Averaged 27.815-27.825(4664-4666) BasePeak:355.05(5625)

BG Mode:Calc. from Peak Group 1 - Event 1 Q3 Scan

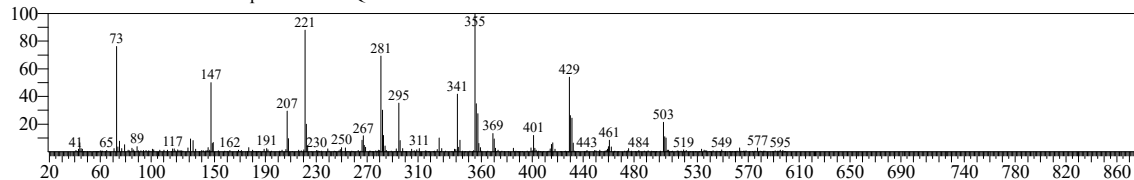

Hit#:1 Entry:46368 Library:NIST20M2.lib

SI:82 Formula:C<sub>24</sub>H<sub>72</sub>O<sub>12</sub>Si<sub>12</sub> CAS:18919-94-3 MolWeight:888 RetIndex:2480

CompName:Tetracosamethyl-cyclododecasiloxane \$\$ 2,2,4,4,6,6,8,8,10,10,12,12,14,14,16,16,18,18,20,20,22,22,24,24-Tetracosamethylcyclododecasiloxane



Hit#:2 Entry:45685 Library:NIST20M2.lib

SI:80 Formula:C<sub>20</sub>H<sub>60</sub>O<sub>10</sub>Si<sub>10</sub> CAS:18772-36-6 MolWeight:740 RetIndex:2067

CompName:Cyclodecasiloxane, eicosamethyl- \$\$ 2,2,4,4,6,6,8,8,10,10,12,12,14,14,16,16,18,18,20,20-Icosamethylcyclodecasiloxane # \$\$ Eicosamethyl-cy



Hit#:3 Entry:43658 Library:NIST20R.lib

SI:79 Formula:C<sub>18</sub>H<sub>54</sub>O<sub>9</sub>Si<sub>9</sub> CAS:556-71-8 MolWeight:666 RetIndex:1860

CompName:Cyclononasiloxane, octadecamethyl- \$\$ Octadecamethyl-cyclononasiloxane \$\$ 2,2,4,4,6,6,8,8,10,10,12,12,14,14,16,16,18,18-Octadecamethylcy

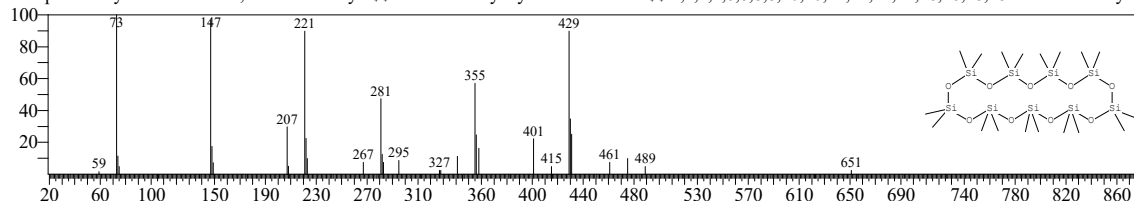

Hit#:4 Entry:42942 Library:NIST20M2.lib

SI:74 Formula:C<sub>18</sub>H<sub>54</sub>O<sub>7</sub>Si<sub>8</sub> CAS:556-69-4 MolWeight:606 RetIndex:1622

CompName:1,1,1,3,3,5,5,7,7,9,9,11,11,13,13,15,15,15-octadecamethyloctasiloxane \$\$ Polydimethylsilane Oil



Hit#:5 Entry:43312 Library:NIST20R.lib

SI:72 Formula:C<sub>16</sub>H<sub>48</sub>O<sub>6</sub>Si<sub>7</sub> CAS:541-01-5 MolWeight:532 RetIndex:1437

CompName:Heptasiloxane, hexadecamethyl- \$\$ Hexadecamethylheptasiloxane \$\$ 1,1,1,3,3,5,5,7,7,9,9,11,11,13,13,13-Hexadecamethylheptasiloxane #

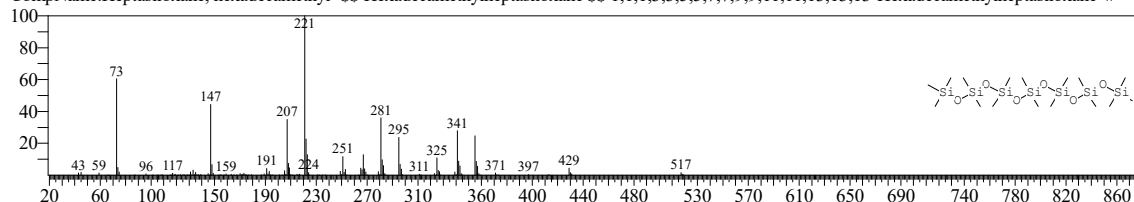

<< Target >>

Line#:18 R.Time:28.360(Scan#:4773) MassPeaks:309

RawMode:Averaged 28.355-28.365(4772-4774) BasePeak:207.05(1360)

BG Mode:Calc. from Peak Group 1 - Event 1 Q3 Scan

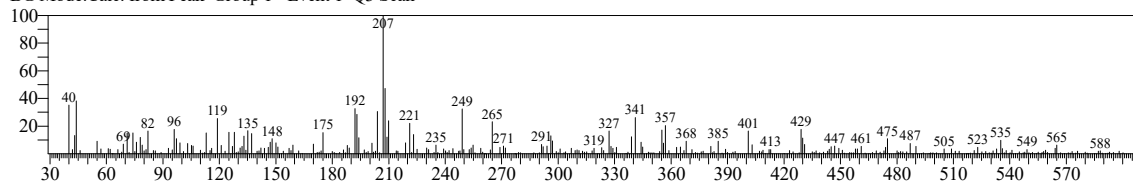

Hit#:1 Entry:402 Library:OA\_TMS\_DB5\_67min\_V3.lib

SI:27 Formula:C20H42O4Si4 CAS:775-01-9 MolWeight:458 RetIndex:1942

CompName:3,4-Dihydroxymandelic acid-4TMS ; 2-(3,4-dihydroxyphenyl)-2-hydroxyacetic acid

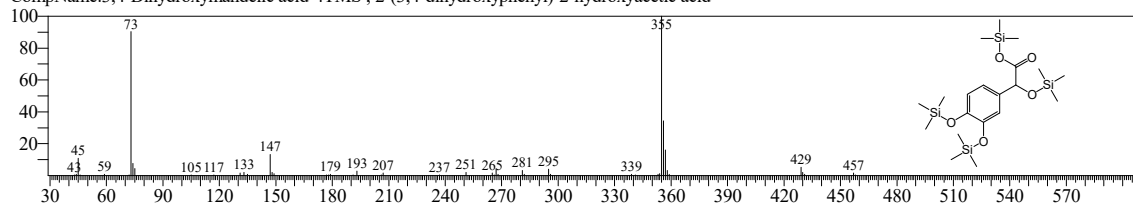

Hit#:2 Entry:315 Library:OA\_TMS\_DB5\_67min\_V3.lib

SI:27 Formula:C16H30O4Si3 CAS:99-50-3 MolWeight:370 RetIndex:1833

CompName:Protocatechuic acid-3TMS ; 3,4-dihydroxybenzoic acid

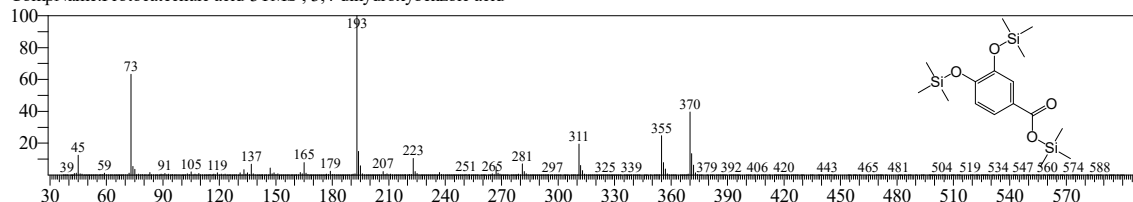

Hit#:3 Entry:359 Library:OA\_TMS\_DB5\_67min\_V3.lib

SI:25 Formula:C18H34O5Si3 CAS:55-10-7 MolWeight:414 RetIndex:1894

CompName:Vanilmandelic acid-3TMS ; 2-hydroxy-2-(4-hydroxy-3-methoxyphenyl)acetic acid

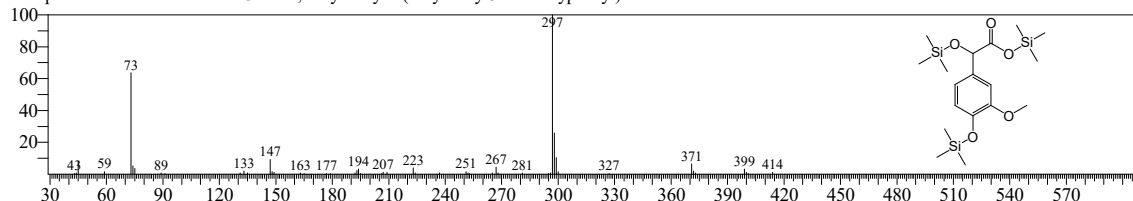

Hit#:4 Entry:329 Library:OA\_TMS\_DB5\_67min\_V3.lib

SI:25 Formula:C11H27NO4SSi2 CAS:820-10-0 MolWeight:325 RetIndex:1848

CompName:Methionine sulfone-2TMS ; 2-amino-4-methylsulfonylbutanoic acid

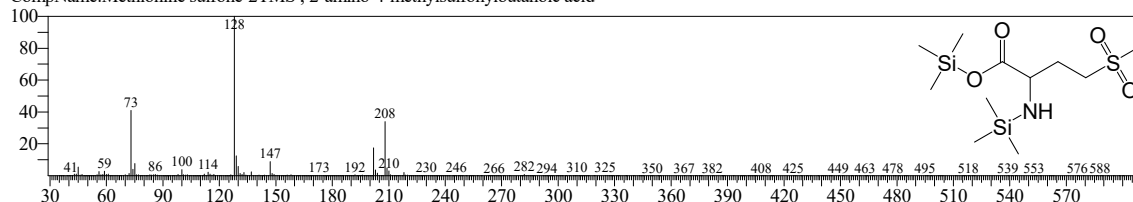

Hit#:5 Entry:420 Library:OA\_TMS\_DB5\_67min\_V3.lib

SI:24 Formula:C18H33NO4Si3 CAS:487-54-7 MolWeight:411 RetIndex:1973

CompName:2-Hydroxyhippuric acid-3TMS ; 2-[(2-hydroxybenzoyl)amino]acetic acid

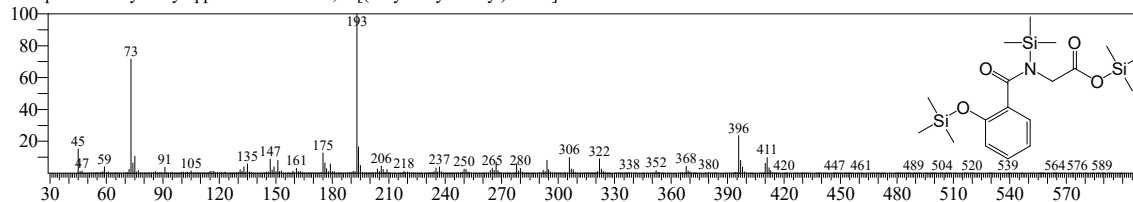

# TNAU

<< Target >>

Line#:19 R.Time:28.400(Scan#:4781) MassPeaks:298

RawMode:Averaged 28.395-28.405(4780-4782) BasePeak:207.00(628)

BG Mode:Calc. from Peak Group 1 - Event 1 Q3 Scan

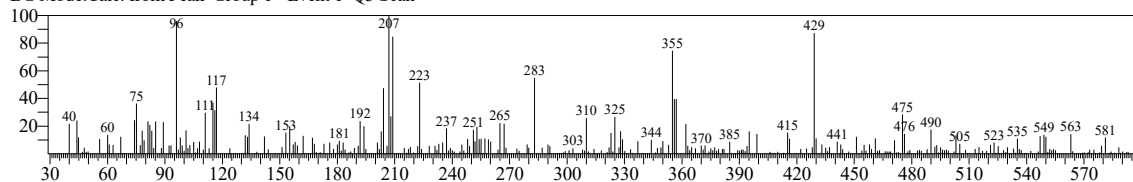

Hit#:1 Entry:402 Library:OA\_TMS\_DB5\_67min\_V3.lib

SI:28 Formula:C20H42O4Si4 CAS:775-01-9 MolWeight:458 RetIndex:1942

CompName:3,4-Dihydroxymandelic acid-4TMS ; 2-(3,4-dihydroxyphenyl)-2-hydroxyacetic acid

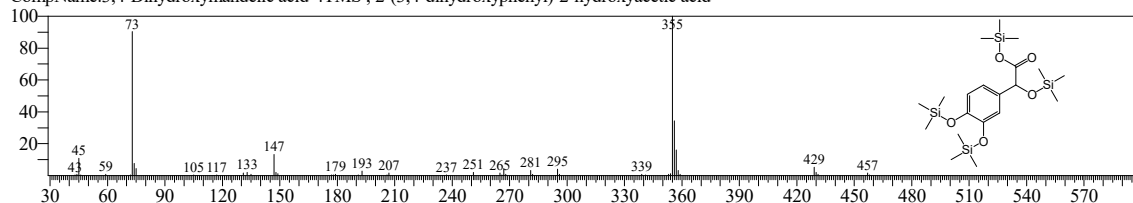

Hit#:2 Entry:431 Library:OA\_TMS\_DB5\_67min\_V3.lib

SI:24 Formula:C21H45NO3Si4 CAS:51-43-4 MolWeight:471 RetIndex:1989

CompName:Epinephrine-4TMS ; 4-[(1R)-1-hydroxy-2-(methylamino)ethyl]benzene-1,2-diol

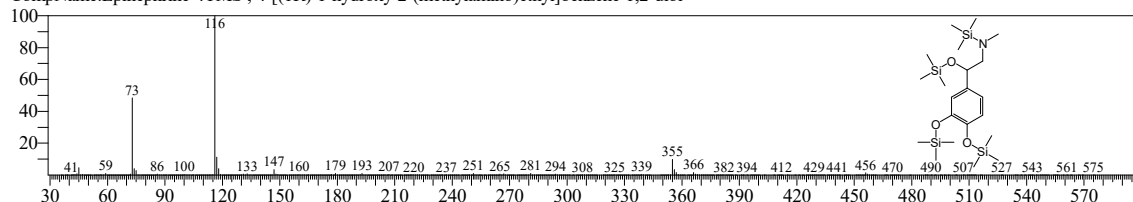

Hit#:3 Entry:442 Library:OA\_TMS\_DB5\_67min\_V3.lib

SI:21 Formula:C19H38O2Si CAS:373-49-9 MolWeight:326 RetIndex:2028

CompName:Palmitoleic acid-TMS ; hexadec-9-enoic acid

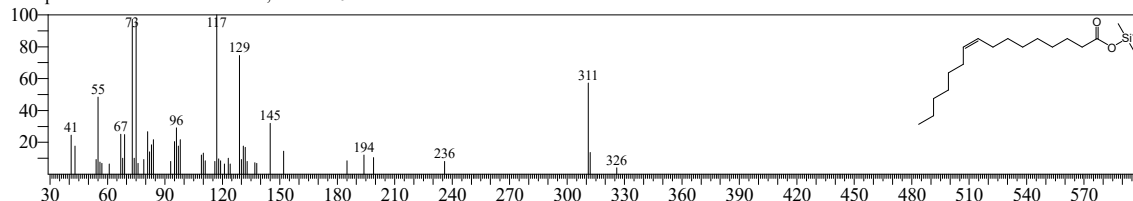

Hit#:4 Entry:211 Library:OA\_TMS\_DB5\_67min\_V3.lib

SI:21 Formula:C13H22O3Si2 CAS:99-96-7 MolWeight:282 RetIndex:1636

CompName:4-Hydroxybenzoic acid-2TMS ; 4-hydroxybenzoic acid

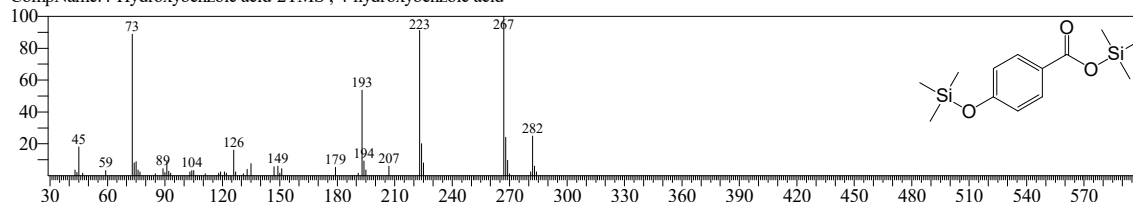

Hit#:5 Entry:252 Library:OA\_TMS\_DB5\_67min\_V3.lib

SI:20 Formula:C18H44O5Si4 CAS:3615-37-0 MolWeight:452 RetIndex:1695

CompName:Fucose-4TMS(1) ; (2S,3R,4S,5R,6R)-6-methyloxane-2,3,4,5-tetrol

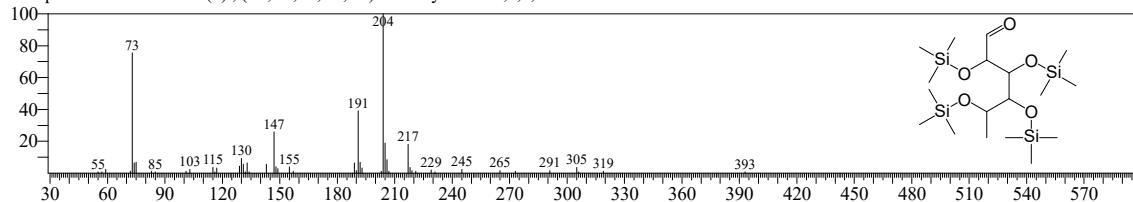

# TNAU

<< Target >>

Line#:20 R.Time:28.525(Scan#:4806) MassPeaks:318

RawMode:Averaged 28.520-28.530(4805-4807) BasePeak:207.05(829)

BG Mode:Calc. from Peak Group 1 - Event 1 Q3 Scan

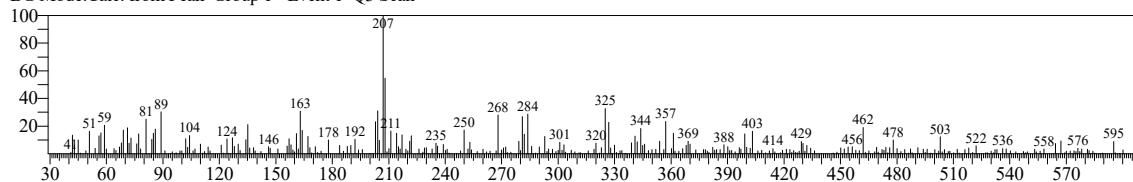

Hit#:1 Entry:328 Library:OA TMS DB5\_67min\_V3.lib

SI:27 Formula:C13H23NO2Si2 CAS:150-13-0 MolWeight:281 RetIndex:1845

CompName:4-Aminobenzoic acid-2TMS ; 4-aminobenzoic acid

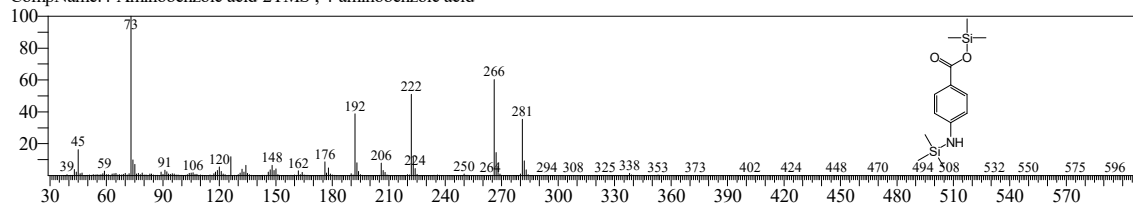

Hit#:2 Entry:290 Library:OA TMS DB5\_67min\_V3.lib

SI:26 Formula:C13H23NO3Si2 CAS:548-93-6 MolWeight:297 RetIndex:1773

CompName:3-Hydroxyanthranilic acid-2TMS ; 2-amino-3-hydroxybenzoic acid

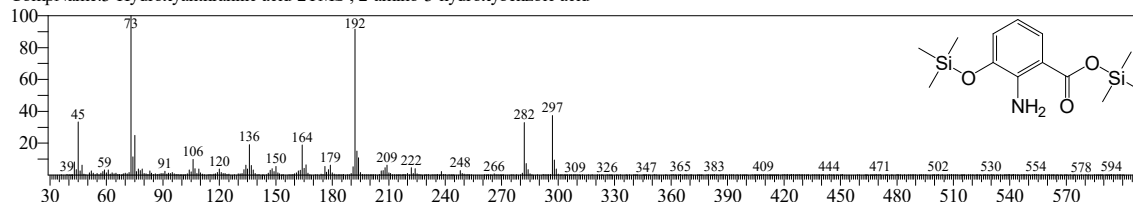

Hit#:3 Entry:205 Library:OA TMS DB5\_67min\_V3.lib

SI:24 Formula:C17H42O5Si4 CAS:1114-34-7 MolWeight:438 RetIndex:1624

CompName:Lyxose-4TMS(1) ; (2S,3S,4R)-2,3,4,5-tetrahydroxypentanal

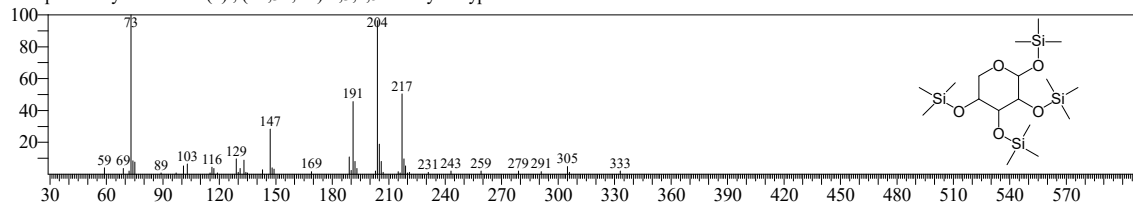

Hit#:4 Entry:295 Library:OA TMS DB5\_67min\_V3.lib

SI:24 Formula:C17H42O5Si4 CAS:58-86-6 MolWeight:438 RetIndex:1784

CompName:Xylose-4TMS(2) ; (2R,3S,4R)-2,3,4,5-tetrahydroxypentanal

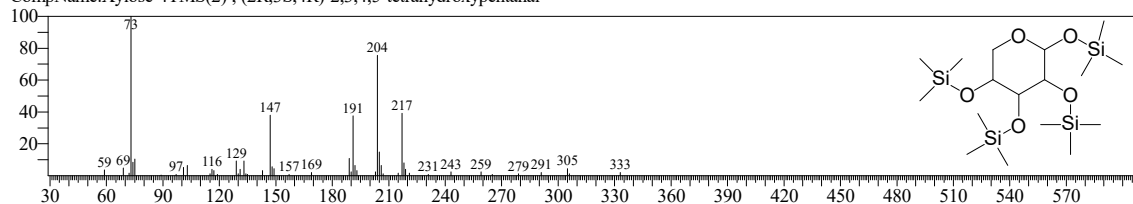

Hit#:5 Entry:232 Library:OA TMS DB5\_67min\_V3.lib

SI:24 Formula:C17H42O5Si4 CAS:10323-20-3 MolWeight:438 RetIndex:1667

CompName:Arabinose-4TMS(2) ; (2S,3R,4R)-2,3,4,5-tetrahydroxypentanal

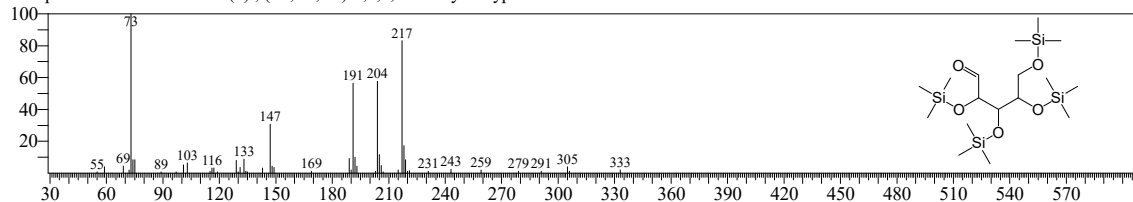

# TNAU

<< Target >>

Line#:21 R.Time:28.705(Scan#:4842) MassPeaks:355

RawMode:Averaged 28.700-28.710(4841-4843) BasePeak:355.05(5974)

BG Mode:Calc. from Peak Group 1 - Event 1 Q3 Scan

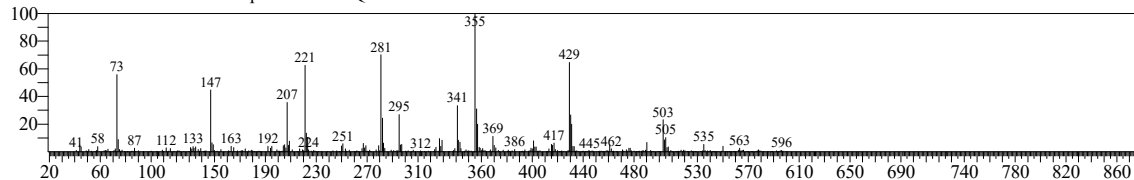

Hit#:1 Entry:46368 Library:NIST20M2.lib

SI:82 Formula:C<sub>24</sub>H<sub>72</sub>O<sub>12</sub>Si<sub>12</sub> CAS:18919-94-3 MolWeight:888 RetIndex:2480

CompName:Tetracosamethyl-cyclododecasiloxane \$\$ 2,2,4,4,6,6,8,8,10,10,12,12,14,14,16,16,18,18,20,20,22,22,24,24-Tetracosamethylcyclododecasiloxane

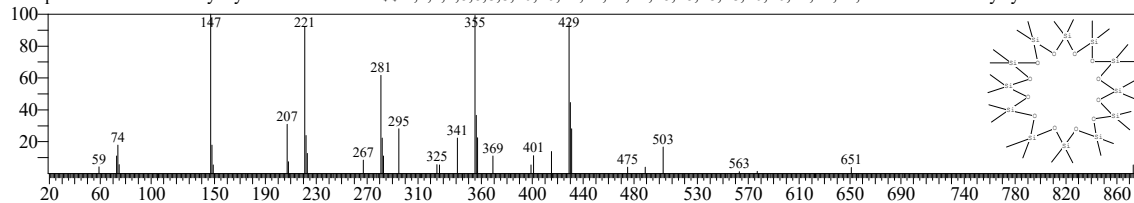

Hit#:2 Entry:45685 Library:NIST20M2.lib

SI:80 Formula:C<sub>20</sub>H<sub>60</sub>O<sub>10</sub>Si<sub>10</sub> CAS:18772-36-6 MolWeight:740 RetIndex:2067

CompName:Cyclodecasiloxane, eicosamethyl- \$\$ 2,2,4,4,6,6,8,8,10,10,12,12,14,14,16,16,18,18,20,20-Icosamethylcyclodecasiloxane # \$\$ Eicosamethyl-cy



Hit#:3 Entry:43658 Library:NIST20R.lib

SI:76 Formula:C<sub>18</sub>H<sub>54</sub>O<sub>9</sub>Si<sub>9</sub> CAS:556-71-8 MolWeight:666 RetIndex:1860

CompName:Cyclononasiloxane, octadecamethyl- \$\$ Octadecamethyl-cyclononasiloxane \$\$ 2,2,4,4,6,6,8,8,10,10,12,12,14,14,16,16,18,18-Octadecamethylcy



Hit#:4 Entry:42942 Library:NIST20M2.lib

SI:74 Formula:C<sub>18</sub>H<sub>54</sub>O<sub>7</sub>Si<sub>8</sub> CAS:556-69-4 MolWeight:606 RetIndex:1622

CompName:1,1,1,3,3,5,5,7,7,9,9,11,11,13,13,15,15,15-octadecamethyloctasiloxane \$\$ Polydimethylsilane Oil



Hit#:5 Entry:43312 Library:NIST20R.lib

SI:73 Formula:C<sub>16</sub>H<sub>48</sub>O<sub>6</sub>Si<sub>7</sub> CAS:541-01-5 MolWeight:532 RetIndex:1437

CompName:Heptasiloxane, hexadecamethyl- \$\$ Hexadecamethylheptasiloxane \$\$ 1,1,1,3,3,5,5,7,7,9,9,11,11,13,13,13-Hexadecamethylheptasiloxane #



# TNAU

<< Target >>

Line#:22 R.Time:29.205(Scan#:4942) MassPeaks:294

RawMode:Averaged 29.200-29.210(4941-4943) BasePeak:281.05(1560)

BG Mode:Calc. from Peak Group 1 - Event 1 Q3 Scan

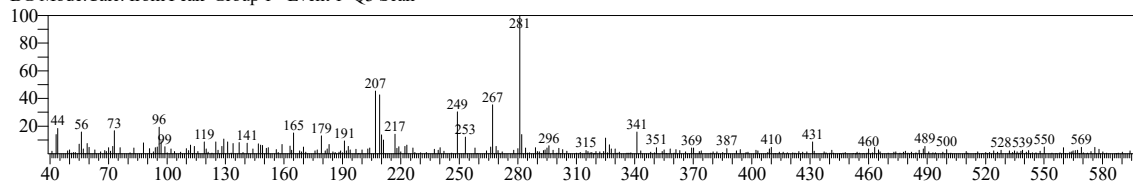

Hit#:1 Entry:211 Library:OA\_TMS\_DB5\_67min\_V3.lib

SI:38 Formula:C<sub>13</sub>H<sub>22</sub>O<sub>3</sub>Si<sub>2</sub> CAS:99-96-7 MolWeight:282 RetIndex:1636

CompName:4-Hydroxybenzoic acid-2TMS ; 4-hydroxybenzoic acid

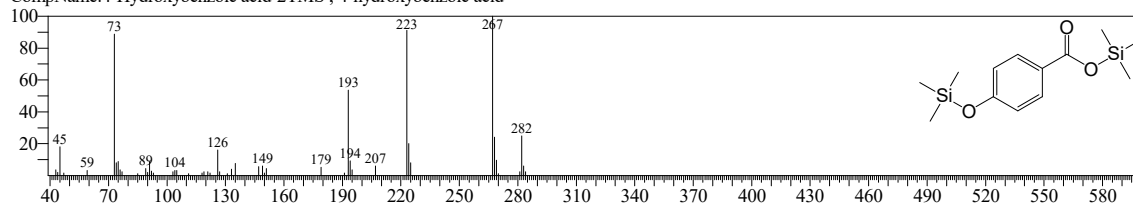

Hit#:2 Entry:294 Library:OA\_TMS\_DB5\_67min\_V3.lib

SI:37 Formula:C<sub>15</sub>H<sub>26</sub>O<sub>4</sub>Si<sub>2</sub> CAS:306-08-1 MolWeight:326 RetIndex:1782

CompName:Homovanillic acid-2TMS ; 2-(4-hydroxy-3-methoxyphenyl)acetic acid

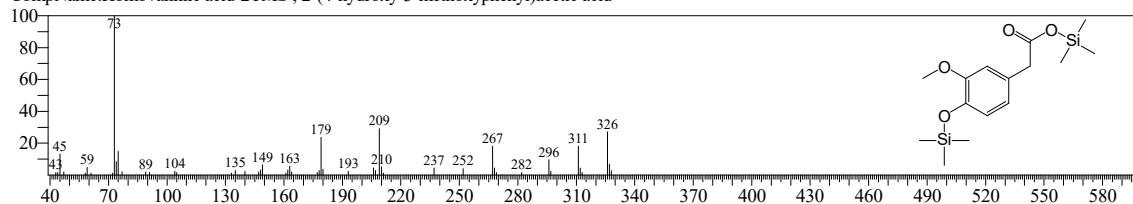

Hit#:3 Entry:438 Library:OA\_TMS\_DB5\_67min\_V3.lib

SI:37 Formula:C<sub>12</sub>H<sub>22</sub>N<sub>2</sub>O<sub>2</sub>Si<sub>2</sub> CAS:104-98-3 MolWeight:282 RetIndex:2014

CompName:Urocanic acid-2TMS ; (E)-3-(1H-imidazol-5-yl)prop-2-enoic acid

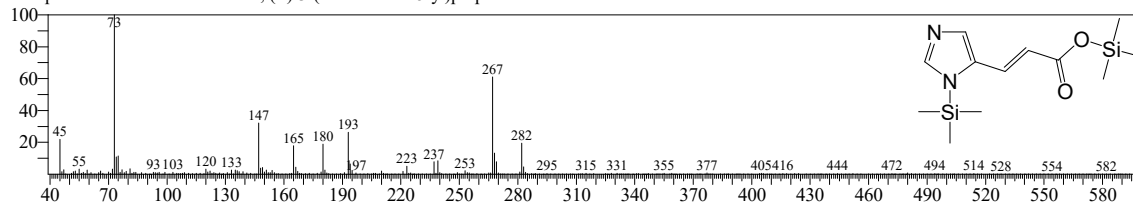

Hit#:4 Entry:184 Library:OA\_TMS\_DB5\_67min\_V3.lib

SI:36 Formula:C<sub>14</sub>H<sub>24</sub>O<sub>3</sub>Si<sub>2</sub> CAS:614-75-5 MolWeight:296 RetIndex:1579

CompName:2-Hydroxyphenylacetic acid-2TMS ; 2-(2-hydroxyphenyl)acetic acid

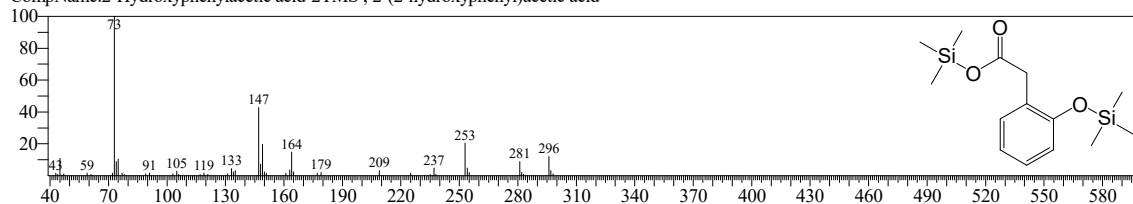

Hit#:5 Entry:179 Library:OA\_TMS\_DB5\_67min\_V3.lib

SI:36 Formula:C<sub>13</sub>H<sub>22</sub>O<sub>3</sub>Si<sub>2</sub> CAS:99-06-9 MolWeight:282 RetIndex:1572

CompName:3-Hydroxybenzoic acid-2TMS ; 3-hydroxybenzoic acid

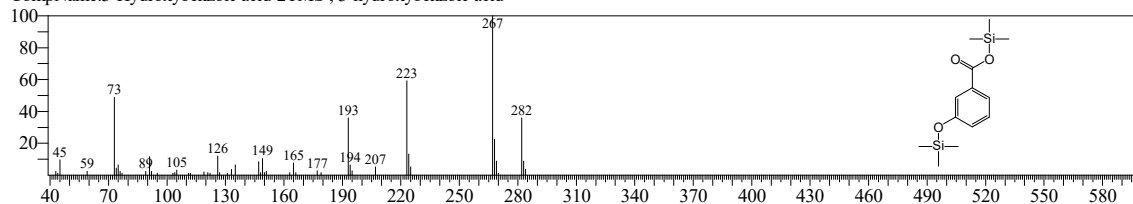



# TNAU

<< Target >>

Line#:23 R.Time:29.490(Scan#:4999) MassPeaks:302

RawMode:Averaged 29.485-29.495(4998-5000) BasePeak:207.05(858)

BG Mode:Calc. from Peak Group 1 - Event 1 Q3 Scan

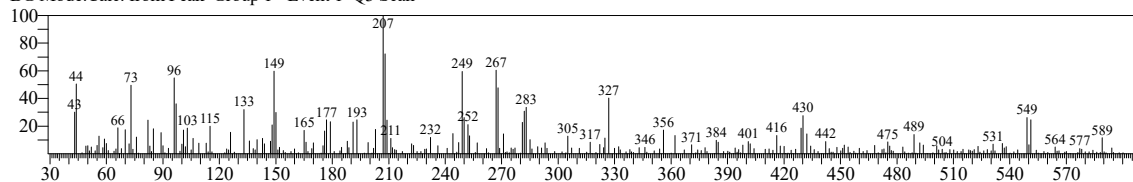

Hit#:1 Entry:179 Library:OA\_TMS\_DB5\_67min\_V3.lib

SI:39 Formula:C<sub>13</sub>H<sub>22</sub>O<sub>3</sub>Si<sub>2</sub> CAS:99-06-9 MolWeight:282 RetIndex:1572

CompName:3-Hydroxybenzoic acid-2TMS ; 3-hydroxybenzoic acid

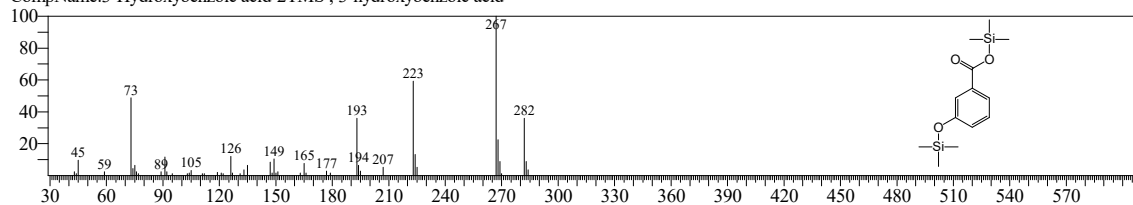

Hit#:2 Entry:211 Library:OA\_TMS\_DB5\_67min\_V3.lib

SI:38 Formula:C<sub>13</sub>H<sub>22</sub>O<sub>3</sub>Si<sub>2</sub> CAS:99-96-7 MolWeight:282 RetIndex:1636

CompName:4-Hydroxybenzoic acid-2TMS ; 4-hydroxybenzoic acid

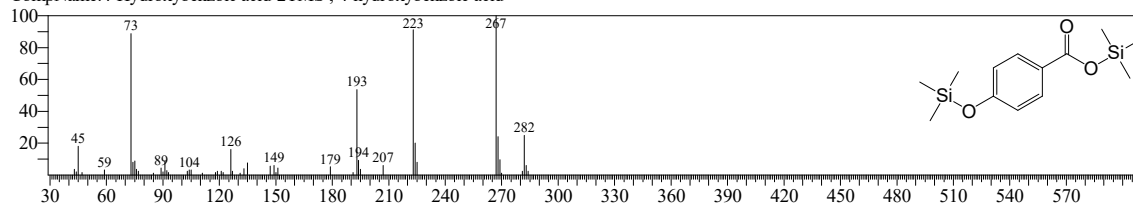

Hit#:3 Entry:328 Library:OA\_TMS\_DB5\_67min\_V3.lib

SI:33 Formula:C<sub>13</sub>H<sub>23</sub>NO<sub>2</sub>Si<sub>2</sub> CAS:150-13-0 MolWeight:281 RetIndex:1845

CompName:4-Aminobenzoic acid-2TMS ; 4-aminobenzoic acid

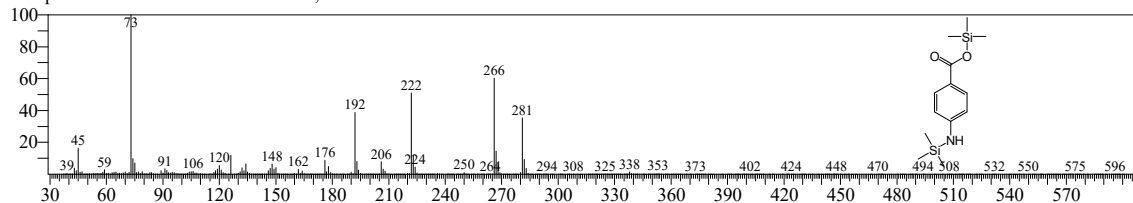

Hit#:4 Entry:294 Library:OA\_TMS\_DB5\_67min\_V3.lib

SI:33 Formula:C<sub>15</sub>H<sub>26</sub>O<sub>4</sub>Si<sub>2</sub> CAS:306-08-1 MolWeight:326 RetIndex:1782

CompName:Homovanillic acid-2TMS ; 2-(4-hydroxy-3-methoxyphenyl)acetic acid

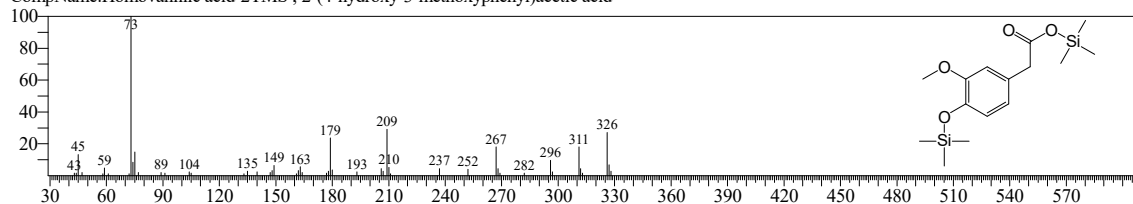

Hit#:5 Entry:438 Library:OA\_TMS\_DB5\_67min\_V3.lib

SI:31 Formula:C<sub>12</sub>H<sub>22</sub>N<sub>2</sub>O<sub>2</sub>Si<sub>2</sub> CAS:104-98-3 MolWeight:282 RetIndex:2014

CompName:Urocanic acid-2TMS ; (E)-3-(1H-imidazol-5-yl)prop-2-enoic acid

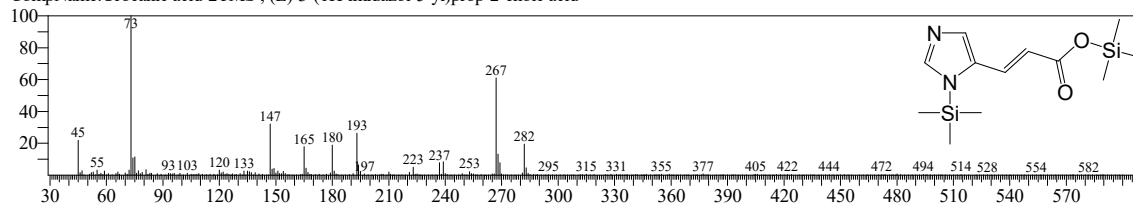

# TNAU

<< Target >>

Line#:24 R.Time:29.720(Scan#:5045) MassPeaks:308

RawMode:Averaged 29.715-29.725(5044-5046) BasePeak:281.05(3381)

BG Mode:Calc. from Peak Group 1 - Event 1 Q3 Scan

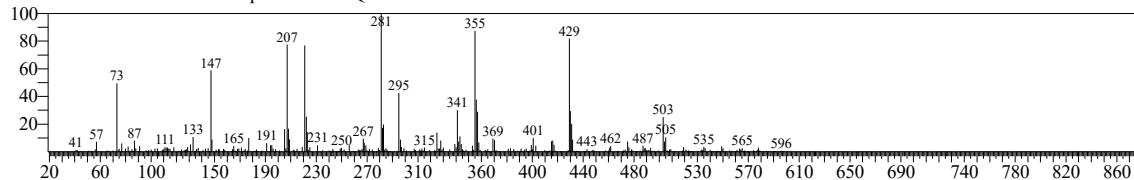

Hit#:1 Entry:46368 Library:NIST20M2.lib

SI:80 Formula:C<sub>24</sub>H<sub>72</sub>O<sub>12</sub>Si<sub>12</sub> CAS:18919-94-3 MolWeight:888 RetIndex:2480

CompName:Tetracosamethyl-cyclododecasiloxane \$\$ 2,2,4,4,6,6,8,8,10,10,12,12,14,14,16,16,18,18,20,20,22,22,24,24-Tetracosamethylcyclododecasiloxane



Hit#:2 Entry:45685 Library:NIST20M2.lib

SI:79 Formula:C<sub>20</sub>H<sub>60</sub>O<sub>10</sub>Si<sub>10</sub> CAS:18772-36-6 MolWeight:740 RetIndex:2067

CompName:Cyclodecasiloxane, eicosamethyl- \$\$ 2,2,4,4,6,6,8,8,10,10,12,12,14,14,16,16,18,18,20,20-Icosamethylcyclodecasiloxane # \$\$ Eicosamethyl-cy



Hit#:3 Entry:44570 Library:NIST20M2.lib

SI:75 Formula:C<sub>18</sub>H<sub>54</sub>O<sub>9</sub>Si<sub>9</sub> CAS:556-71-8 MolWeight:666 RetIndex:1860

CompName:Cyclononasiloxane, octadecamethyl- \$\$ Octadecamethyl-cyclononasiloxane \$\$ 2,2,4,4,6,6,8,8,10,10,12,12,14,14,16,16,18,18-Octadecamethylcy



Hit#:4 Entry:42942 Library:NIST20M2.lib

SI:72 Formula:C<sub>18</sub>H<sub>54</sub>O<sub>7</sub>Si<sub>8</sub> CAS:556-69-4 MolWeight:606 RetIndex:1622

CompName:1,1,1,3,3,5,5,7,7,9,9,11,11,13,13,15,15-octadecamethyloctasiloxane \$\$ Polydimethylsilane Oil



Hit#:5 Entry:43312 Library:NIST20R.lib

SI:71 Formula:C<sub>16</sub>H<sub>48</sub>O<sub>6</sub>Si<sub>7</sub> CAS:541-01-5 MolWeight:532 RetIndex:1437

CompName:Heptasiloxane, hexadecamethyl- \$\$ Hexadecamethylheptasiloxane \$\$ 1,1,1,3,3,5,5,7,7,9,9,11,11,13,13,13-Hexadecamethylheptasiloxane #



# TNAU

<< Target >>

Line#:25 R.Time:30.270(Scan#:5155) MassPeaks:296

RawMode:Averaged 30.265-30.275(5154-5156) BasePeak:265.00(767)

BG Mode:Calc. from Peak Group 1 - Event 1 Q3 Scan

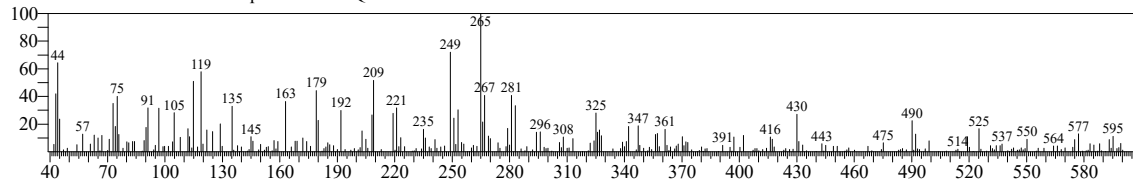

Hit#:1 Entry:310 Library:OA\_TMS\_DB5\_67min\_V3.lib

SI:36 Formula:C11H20N4OSi2 CAS:68-94-0 MolWeight:280 RetIndex:1822

CompName:Hypoxanthine-2TMS ; 3,7-dihdropurin-6-one

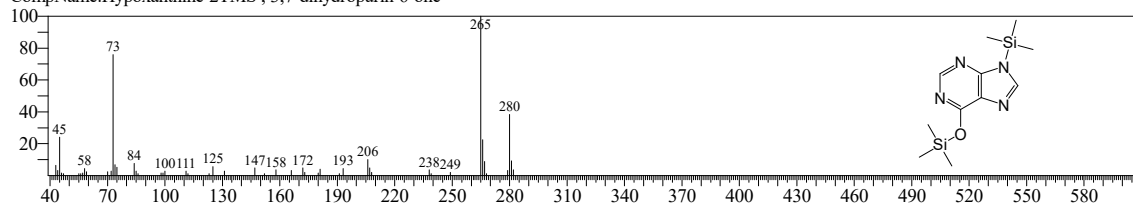

Hit#:2 Entry:382 Library:OA\_TMS\_DB5\_67min\_V3.lib

SI:35 Formula:C18H34O4Si3 CAS:6482-98-0 MolWeight:398 RetIndex:1918

CompName:4-Hydroxyphenyllactic acid-3TMS ; 2-hydroxy-3-(4-hydroxyphenyl)propanoate

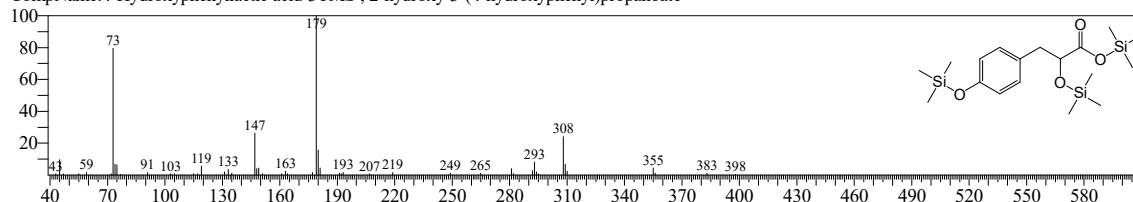

Hit#:3 Entry:138 Library:OA\_TMS\_DB5\_67min\_V3.lib

SI:34 Formula:C14H24O3Si2 CAS:90-64-2 MolWeight:296 RetIndex:1486

CompName:Mandelic acid-2TMS ; 2-hydroxy-2-phenylacetic acid

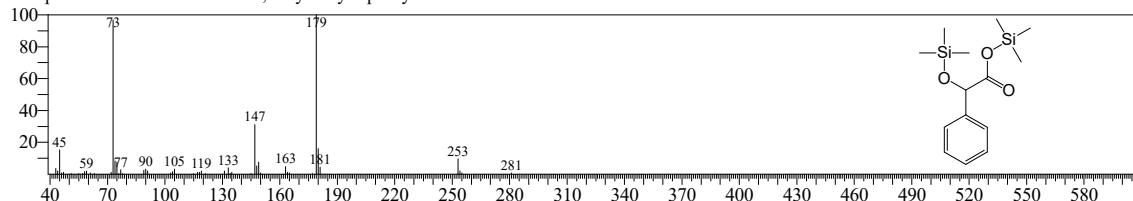

Hit#:4 Entry:294 Library:OA\_TMS\_DB5\_67min\_V3.lib

SI:33 Formula:C15H26O4Si2 CAS:306-08-1 MolWeight:326 RetIndex:1782

CompName:Homovanillic acid-2TMS ; 2-(4-hydroxy-3-methoxyphenyl)acetic acid

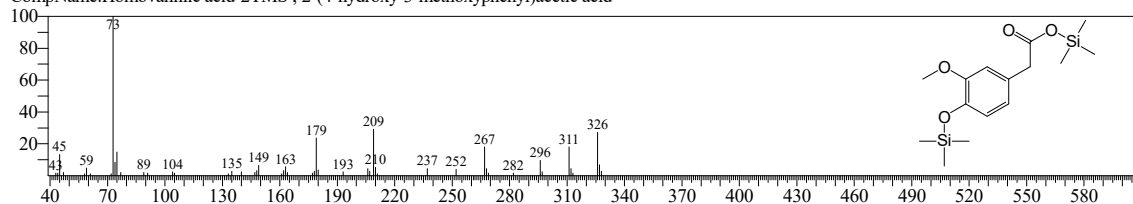

Hit#:5 Entry:461 Library:OA\_TMS\_DB5\_67min\_V3.lib

SI:32 Formula:C20H37NO4Si3 CAS:537-55-3 MolWeight:439 RetIndex:2119

CompName:N-Acetyltyrosine-3TMS ; (2S)-2-acetamido-3-(4-hydroxyphenyl)propanoic acid

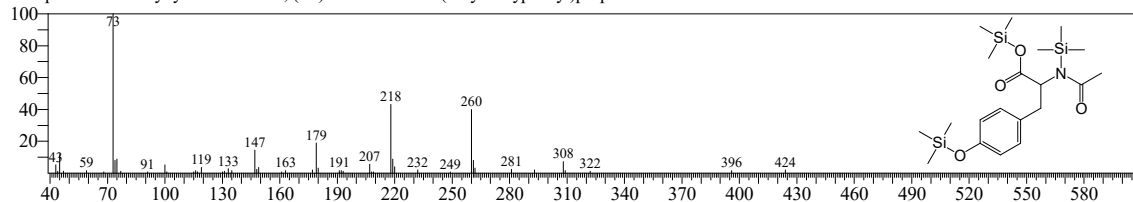

# TNAU

<< Target >>

Line#:26 R.Time:30.305(Scan#:5162) MassPeaks:289

RawMode:Averaged 30.300-30.310(5161-5163) BasePeak:207.05(2727)

BG Mode:Calc. from Peak Group 1 - Event 1 Q3 Scan

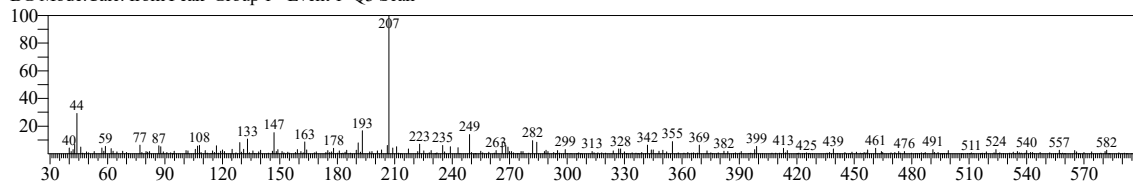

Hit#:1 Entry:79 Library:OA\_TMS\_DB5\_67min\_V3.lib

SI:32 Formula:C9H27O4PSi3 CAS:7664-38-2 MolWeight:314 RetIndex:1280

CompName:Phosphoric acid-3TMS ; phosphoric acid

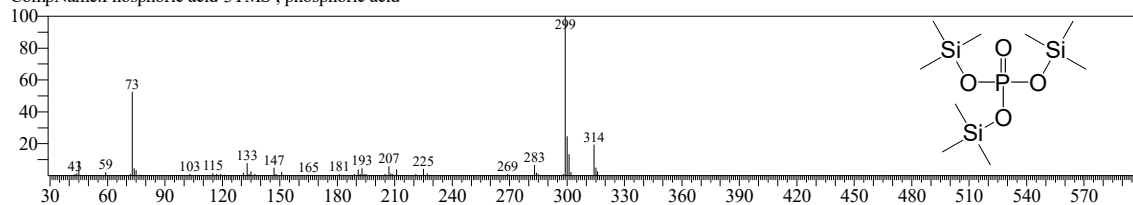

Hit#:2 Entry:10 Library:OA\_TMS\_DB5\_67min\_V3.lib

SI:31 Formula:C10H24O3Si2 CAS:594-61-6 MolWeight:248 RetIndex:1067

CompName:2-Hydroxyisobutyric acid-2TMS ; 2-hydroxy-2-methylpropanoic acid

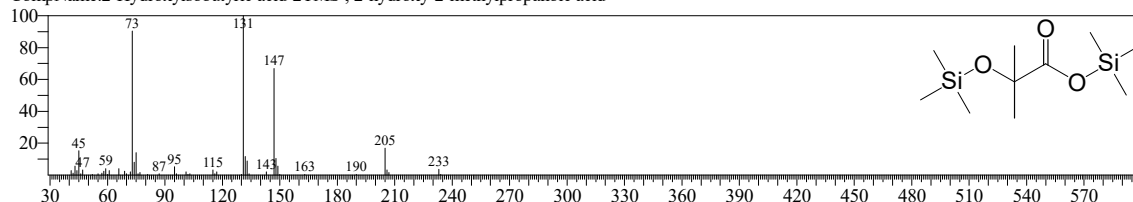

Hit#:3 Entry:402 Library:OA\_TMS\_DB5\_67min\_V3.lib

SI:30 Formula:C20H42O4Si4 CAS:775-01-9 MolWeight:458 RetIndex:1942

CompName:3,4-Dihydroxymandelic acid-4TMS ; 2-(3,4-dihydroxyphenyl)-2-hydroxyacetic acid

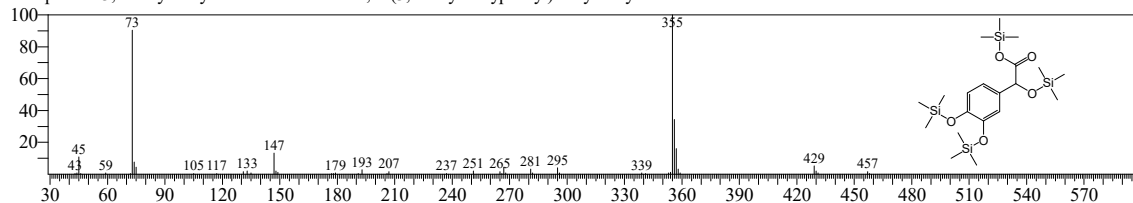

Hit#:4 Entry:315 Library:OA\_TMS\_DB5\_67min\_V3.lib

SI:30 Formula:C16H30O4Si3 CAS:99-50-3 MolWeight:370 RetIndex:1833

CompName:Protocatechuic acid-3TMS ; 3,4-dihydroxybenzoic acid

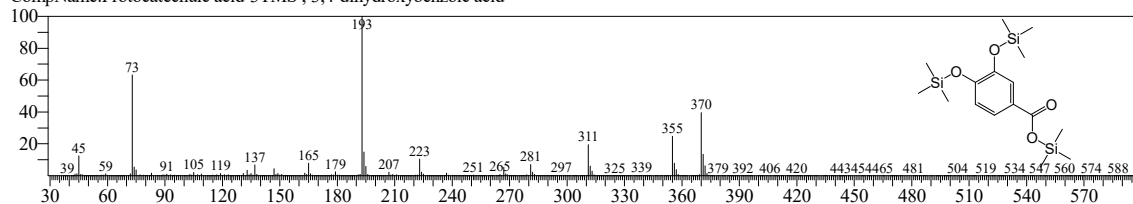

Hit#:5 Entry:13 Library:OA\_TMS\_DB5\_67min\_V3.lib

SI:29 Formula:C8H20O3Si2 CAS:79-14-1 MolWeight:220 RetIndex:1074

CompName:Glycolic acid-2TMS ; 2-hydroxyacetic acid

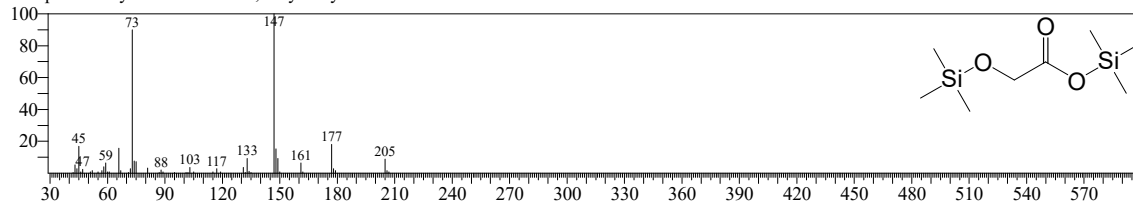

# TNAU

<< Target >>

Line#:27 R.Time:30.955(Scan#:5292) MassPeaks:294

RawMode:Averaged 30.950-30.960(5291-5293) BasePeak:281.05(1785)

BG Mode:Calc. from Peak Group 1 - Event 1 Q3 Scan

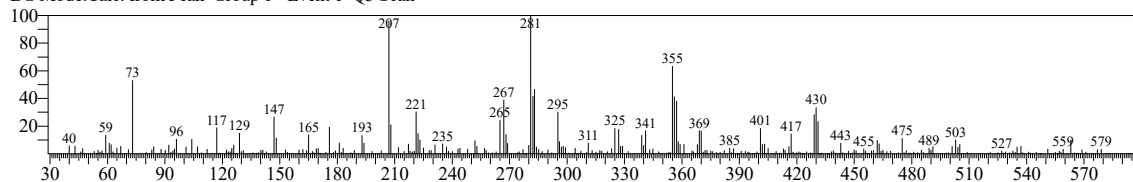

Hit#:1 Entry:402 Library:OA\_TMS\_DB5\_67min\_V3.lib

SI:51 Formula:C<sub>20</sub>H<sub>42</sub>O<sub>4</sub>Si<sub>4</sub> CAS:775-01-9 MolWeight:458 RetIndex:1942

CompName:3,4-Dihydroxymandelic acid-4TMS ; 2-(3,4-dihydroxyphenyl)-2-hydroxyacetic acid



Hit#:2 Entry:343 Library:OA\_TMS\_DB5\_67min\_V3.lib

SI:44 Formula:C<sub>18</sub>H<sub>37</sub>NO<sub>3</sub>Si<sub>3</sub> CAS:51-43-4 MolWeight:399 RetIndex:1868

CompName:Epinephrine-3TMS ; 4-[(1R)-1-hydroxy-2-(methylamino)ethyl]benzene-1,2-diol

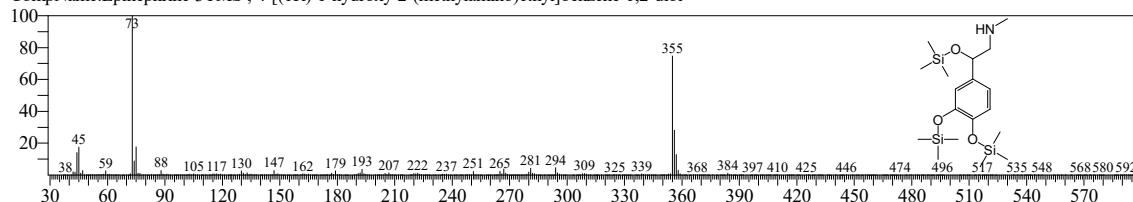

Hit#:3 Entry:315 Library:OA\_TMS\_DB5\_67min\_V3.lib

SI:42 Formula:C<sub>16</sub>H<sub>30</sub>O<sub>4</sub>Si<sub>3</sub> CAS:99-50-3 MolWeight:370 RetIndex:1833

CompName:Protocatechuic acid-3TMS ; 3,4-dihydroxybenzoic acid

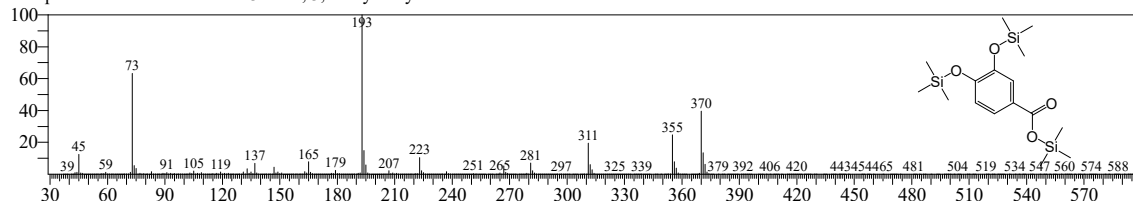

Hit#:4 Entry:211 Library:OA\_TMS\_DB5\_67min\_V3.lib

SI:38 Formula:C<sub>13</sub>H<sub>22</sub>O<sub>3</sub>Si<sub>2</sub> CAS:99-96-7 MolWeight:282 RetIndex:1636

CompName:4-Hydroxybenzoic acid-2TMS ; 4-hydroxybenzoic acid



Hit#:5 Entry:438 Library:OA\_TMS\_DB5\_67min\_V3.lib

SI:37 Formula:C<sub>12</sub>H<sub>22</sub>N<sub>2</sub>O<sub>2</sub>Si<sub>2</sub> CAS:104-98-3 MolWeight:282 RetIndex:2014

CompName:Urocanic acid-2TMS ; (E)-3-(1H-imidazol-5-yl)prop-2-enoic acid

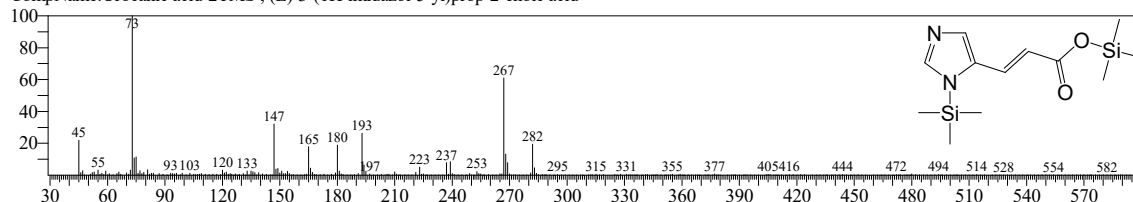

# TNAU

<< Target >>

Line#:28 R.Time:30.990(Scan#:5299) MassPeaks:283

RawMode:Averaged 30.985-30.995(5298-5300) BasePeak:207.00(2385)

BG Mode:Calc. from Peak Group 1 - Event 1 Q3 Scan

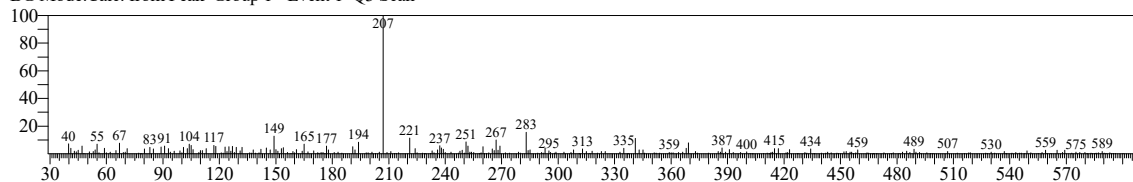

Hit#:1 Entry:179 Library:OA TMS DB5\_67min\_V3.lib

SI:32 Formula:C<sub>13</sub>H<sub>22</sub>O<sub>3</sub>Si<sub>2</sub> CAS:99-06-9 MolWeight:282 RetIndex:1572

CompName:3-Hydroxybenzoic acid-2TMS ; 3-hydroxybenzoic acid



Hit#:2 Entry:428 Library:OA TMS DB5\_67min\_V3.lib

SI:31 Formula:C<sub>10</sub>H<sub>16</sub>N<sub>4</sub>O<sub>2</sub>Si CAS:611-59-6 MolWeight:252 RetIndex:1983

CompName:ParaXanthine-TMS ; 1,7-dimethyl-3H-purine-2,6-dione

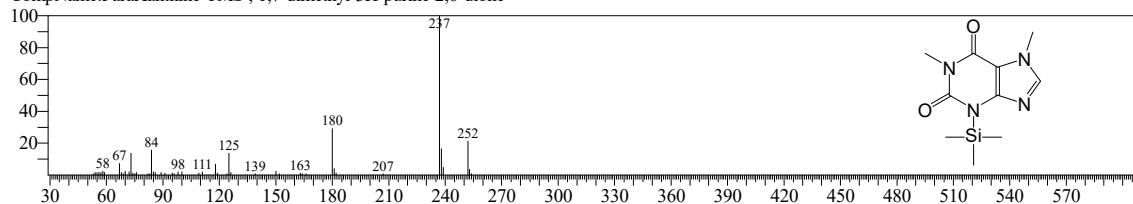

Hit#:3 Entry:491 Library:OA TMS DB5\_67min\_V3.lib

SI:30 Formula:C<sub>21</sub>H<sub>44</sub>O<sub>2</sub>Si CAS:57-11-4 MolWeight:356 RetIndex:2244

CompName:Stearic acid-TMS ; octadecanoic acid

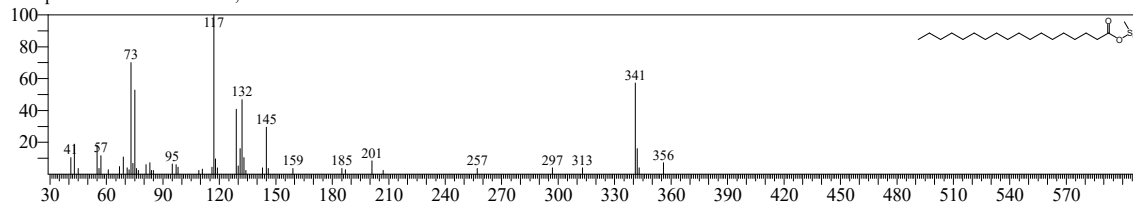

Hit#:4 Entry:211 Library:OA TMS DB5\_67min\_V3.lib

SI:28 Formula:C<sub>13</sub>H<sub>22</sub>O<sub>3</sub>Si<sub>2</sub> CAS:99-96-7 MolWeight:282 RetIndex:1636

CompName:4-Hydroxybenzoic acid-2TMS ; 4-hydroxybenzoic acid

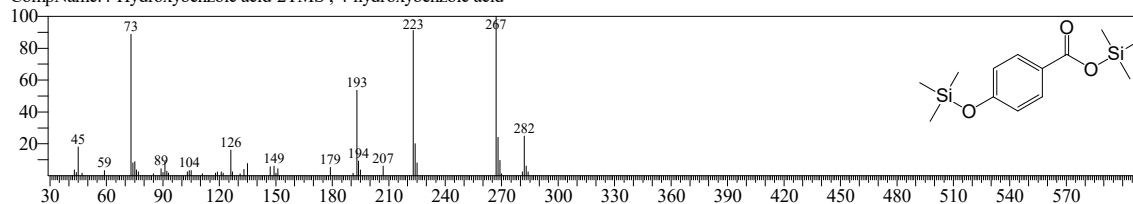

Hit#:5 Entry:395 Library:OA TMS DB5\_67min\_V3.lib

SI:25 Formula:C<sub>10</sub>H<sub>16</sub>N<sub>4</sub>O<sub>2</sub>Si CAS:58-55-9 MolWeight:252 RetIndex:1936

CompName:Theophylline-TMS ; 1,3-dimethyl-7H-purine-2,6-dione

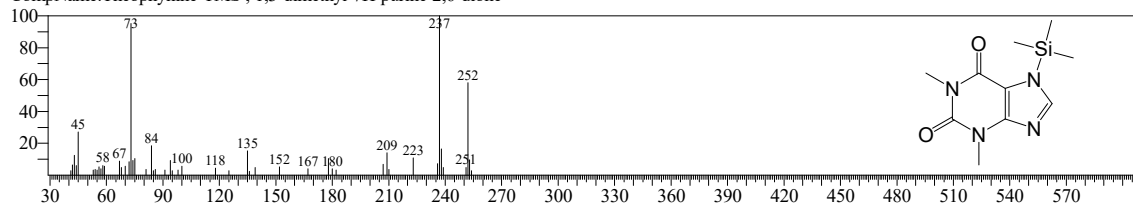

# TNAU

<< Target >>

Line#:29 R.Time:31.295(Scan#:5360) MassPeaks:299

RawMode:Averaged 31.290-31.300(5359-5361) BasePeak:207.05(1266)

BG Mode:Calc. from Peak Group 1 - Event 1 Q3 Scan

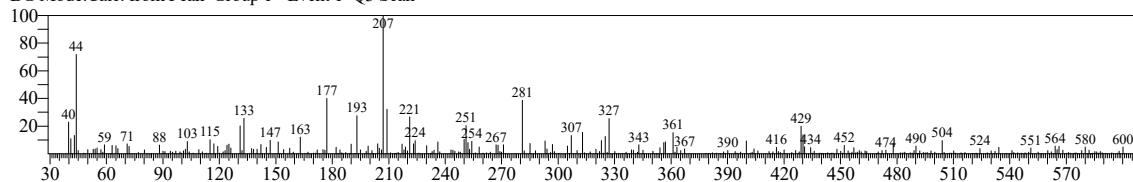

Hit#:1 Entry:359 Library:OA\_TMS\_DB5\_67min\_V3.lib

SI:32 Formula:C18H34O5Si3 CAS:55-10-7 MolWeight:414 RetIndex:1894

CompName:Vanilmandelic acid-3TMS ; 2-hydroxy-2-(4-hydroxy-3-methoxyphenyl)acetic acid

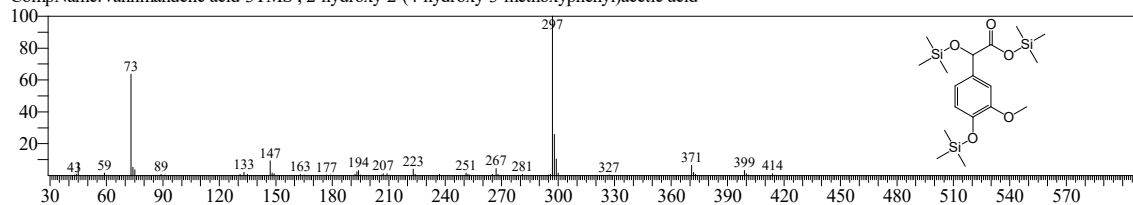

Hit#:2 Entry:179 Library:OA\_TMS\_DB5\_67min\_V3.lib

SI:29 Formula:C13H22O3Si2 CAS:99-06-9 MolWeight:282 RetIndex:1572

CompName:3-Hydroxybenzoic acid-2TMS ; 3-hydroxybenzoic acid

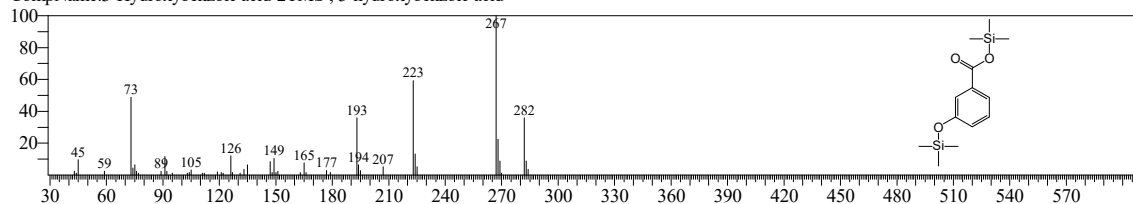

Hit#:3 Entry:211 Library:OA\_TMS\_DB5\_67min\_V3.lib

SI:29 Formula:C13H22O3Si2 CAS:99-96-7 MolWeight:282 RetIndex:1636

CompName:4-Hydroxybenzoic acid-2TMS ; 4-hydroxybenzoic acid

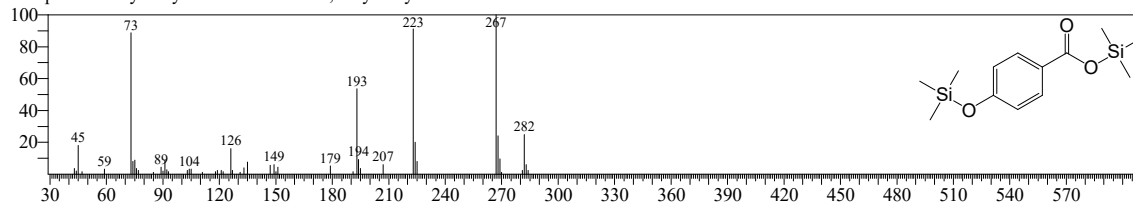

Hit#:4 Entry:315 Library:OA\_TMS\_DB5\_67min\_V3.lib

SI:29 Formula:C16H30O4Si3 CAS:99-50-3 MolWeight:370 RetIndex:1833

CompName:Protocatechuic acid-3TMS ; 3,4-dihydroxybenzoic acid

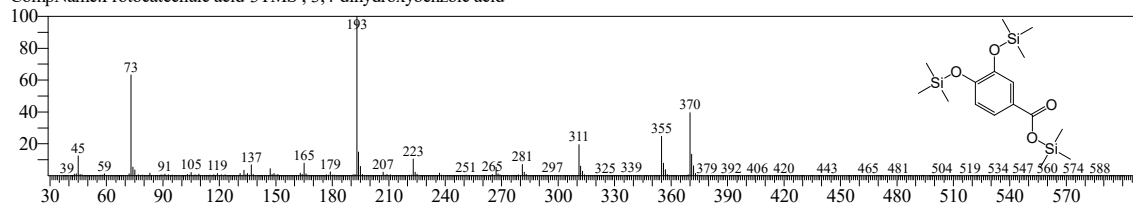

Hit#:5 Entry:420 Library:OA\_TMS\_DB5\_67min\_V3.lib

SI:25 Formula:C18H33NO4Si3 CAS:487-54-7 MolWeight:411 RetIndex:1973

CompName:2-Hydroxyhippuric acid-3TMS ; 2-[(2-hydroxybenzoyl)amino]acetic acid

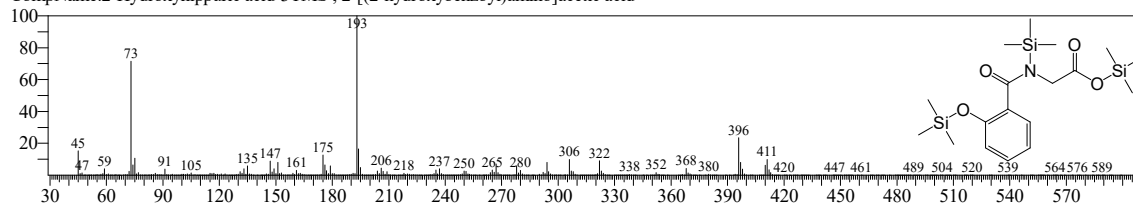

# TNAU

<< Target >>

Line#:30 R.Time:31.430(Scan#:5387) MassPeaks:311

RawMode:Averaged 31.425-31.435(5386-5388) BasePeak:207.05(1982)

BG Mode:Calc. from Peak Group 1 - Event 1 Q3 Scan

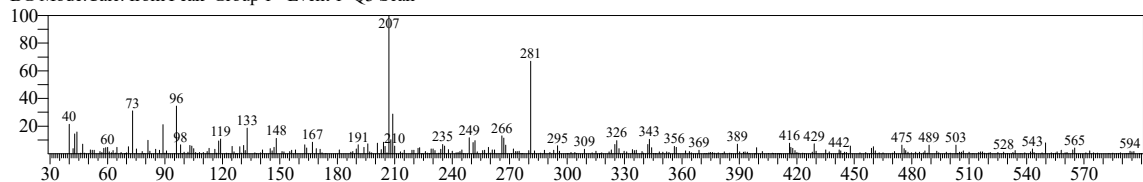

Hit#:1 Entry:328 Library:OA\_TMS\_DB5\_67min\_V3.lib

SI:37 Formula:C<sub>13</sub>H<sub>23</sub>NO<sub>2</sub>Si<sub>2</sub> CAS:150-13-0 MolWeight:281 RetIndex:1845

CompName:4-Aminobenzoic acid-2TMS ; 4-aminobenzoic acid

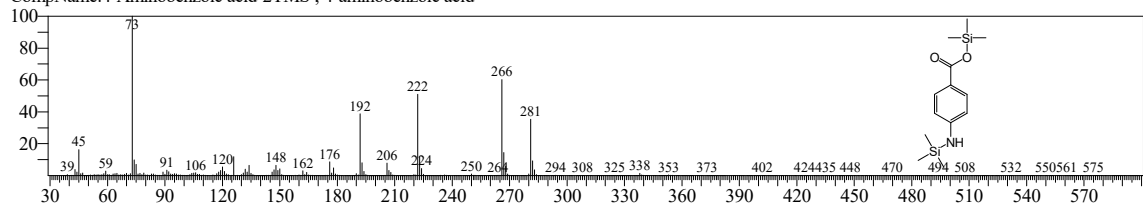

Hit#:2 Entry:294 Library:OA\_TMS\_DB5\_67min\_V3.lib

SI:36 Formula:C<sub>15</sub>H<sub>26</sub>O<sub>4</sub>Si<sub>2</sub> CAS:306-08-1 MolWeight:326 RetIndex:1782

CompName:Homovanillic acid-2TMS ; 2-(4-hydroxy-3-methoxyphenyl)acetic acid

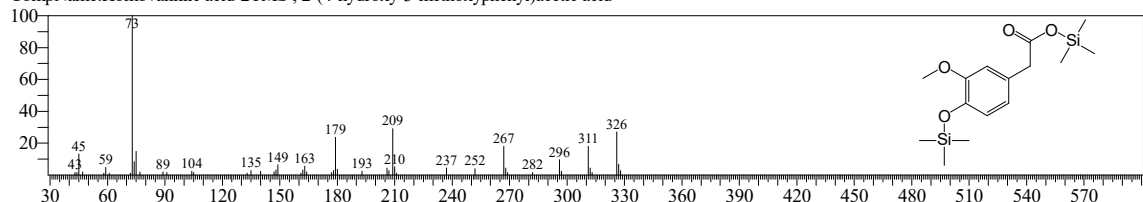

Hit#:3 Entry:203 Library:OA\_TMS\_DB5\_67min\_V3.lib

SI:35 Formula:C<sub>13</sub>H<sub>23</sub>NO<sub>2</sub>Si<sub>2</sub> CAS:118-92-3 MolWeight:281 RetIndex:1623

CompName:Anthranilic acid-2TMS ; 2-aminobenzoic acid

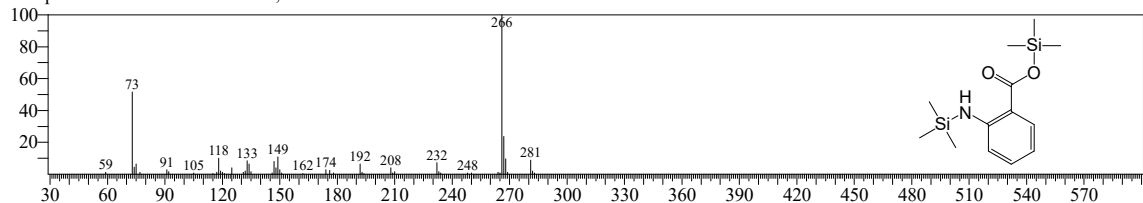

Hit#:4 Entry:528 Library:OA\_TMS\_DB5\_67min\_V3.lib

SI:34 Formula:C<sub>17</sub>H<sub>28</sub>Cl<sub>2</sub>N<sub>2</sub>O<sub>5</sub>Si<sub>2</sub> CAS:56-75-7 MolWeight:466 RetIndex:2508

CompName:Chloramphenicol-2TMS ; 2,2-dichloro-N-[(1R,2R)-1,3-dihydroxy-1-(4-nitrophenyl)propan-2-yl]acetamide

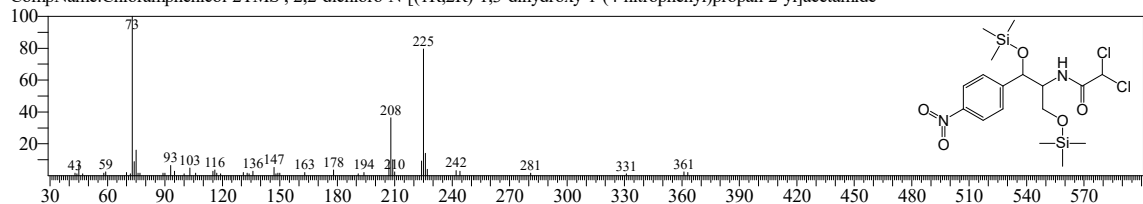

Hit#:5 Entry:195 Library:OA\_TMS\_DB5\_67min\_V3.lib

SI:34 Formula:C<sub>15</sub>H<sub>26</sub>O<sub>3</sub>Si<sub>2</sub> CAS:529-64-6 MolWeight:310 RetIndex:1600

CompName:Tropic acid-2TMS ; 3-hydroxy-2-phenylpropanoic acid

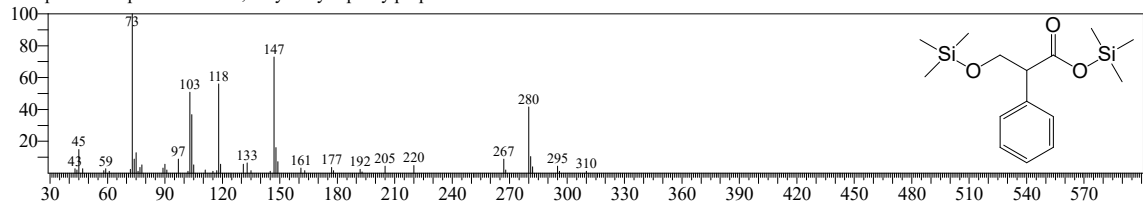



# TNAU

<< Target >>

Line#:31 R.Time:31.900(Scan#:5481) MassPeaks:318

RawMode:Averaged 31.895-31.905(5480-5482) BasePeak:139.05(1036)

BG Mode:Calc. from Peak Group 1 - Event 1 Q3 Scan

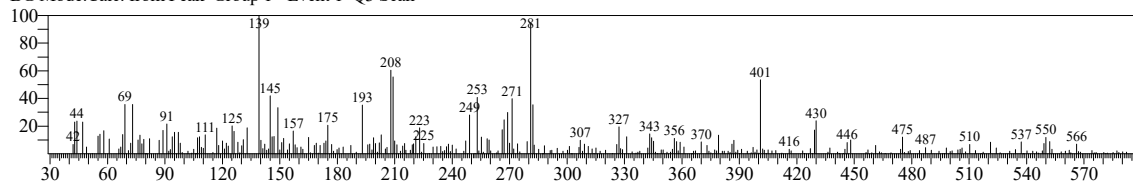

Hit#:1 Entry:211 Library:OA\_TMS\_DB5\_67min\_V3.lib

SI:35 Formula:C<sub>13</sub>H<sub>22</sub>O<sub>3</sub>Si<sub>2</sub> CAS:99-96-7 MolWeight:282 RetIndex:1636

CompName:4-Hydroxybenzoic acid-2TMS ; 4-hydroxybenzoic acid

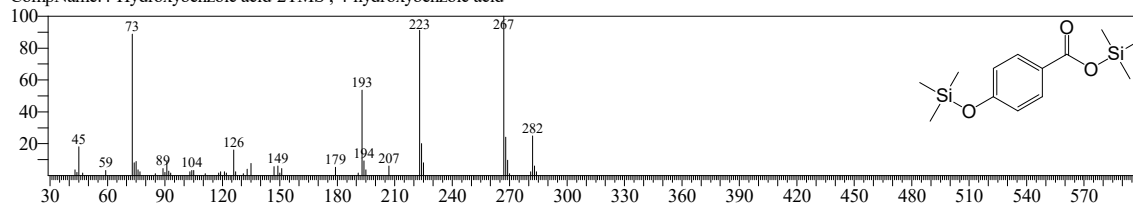

Hit#:2 Entry:179 Library:OA\_TMS\_DB5\_67min\_V3.lib

SI:33 Formula:C<sub>13</sub>H<sub>22</sub>O<sub>3</sub>Si<sub>2</sub> CAS:99-06-9 MolWeight:282 RetIndex:1572

CompName:3-Hydroxybenzoic acid-2TMS ; 3-hydroxybenzoic acid

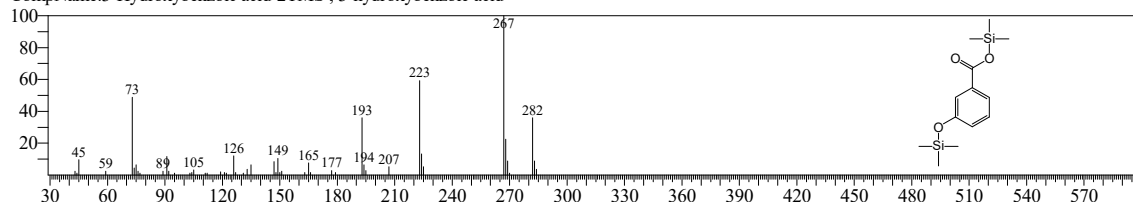

Hit#:3 Entry:328 Library:OA\_TMS\_DB5\_67min\_V3.lib

SI:32 Formula:C<sub>13</sub>H<sub>23</sub>NO<sub>2</sub>Si<sub>2</sub> CAS:150-13-0 MolWeight:281 RetIndex:1845

CompName:4-Aminobenzoic acid-2TMS ; 4-aminobenzoic acid

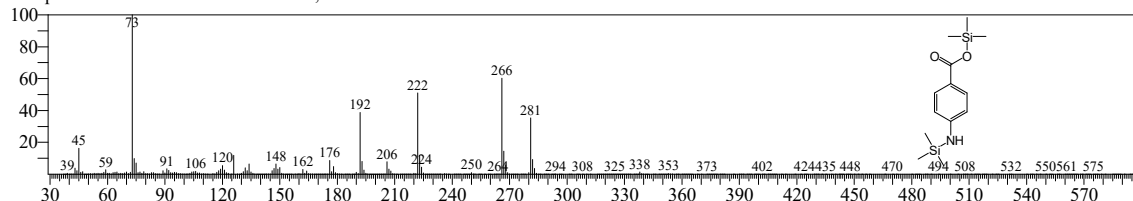

Hit#:4 Entry:438 Library:OA\_TMS\_DB5\_67min\_V3.lib

SI:32 Formula:C<sub>12</sub>H<sub>22</sub>N<sub>2</sub>O<sub>2</sub>Si<sub>2</sub> CAS:104-98-3 MolWeight:282 RetIndex:2014

CompName:Urocanic acid-2TMS ; (E)-3-(1H-imidazol-5-yl)prop-2-enoic acid

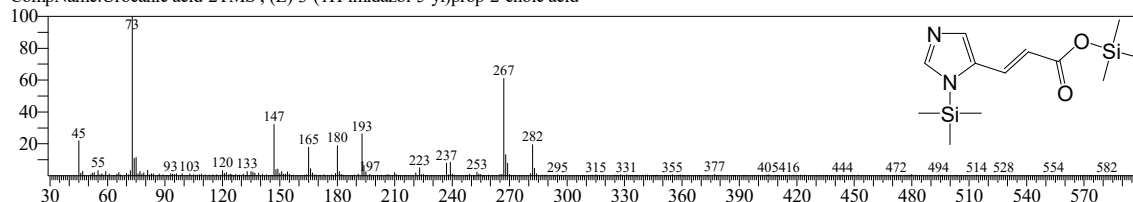

Hit#:5 Entry:203 Library:OA\_TMS\_DB5\_67min\_V3.lib

SI:32 Formula:C<sub>13</sub>H<sub>23</sub>NO<sub>2</sub>Si<sub>2</sub> CAS:118-92-3 MolWeight:281 RetIndex:1623

CompName:Anthranilic acid-2TMS ; 2-aminobenzoic acid

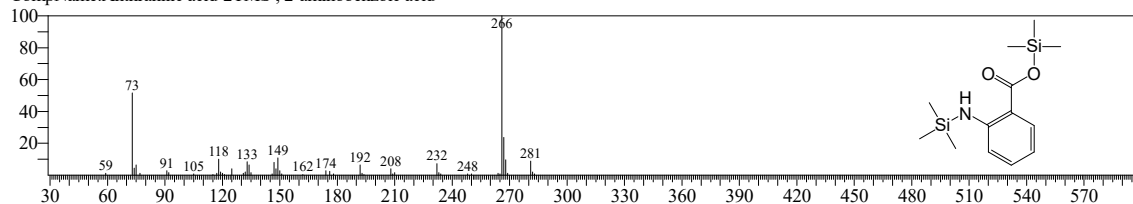

# TNAU

<< Target >>

Line#:32 R.Time:32.005(Scan#:5502) MassPeaks:299

RawMode:Averaged 32.000-32.010(5501-5503) BasePeak:282.05(986)

BG Mode:Calc. from Peak Group 1 - Event 1 Q3 Scan

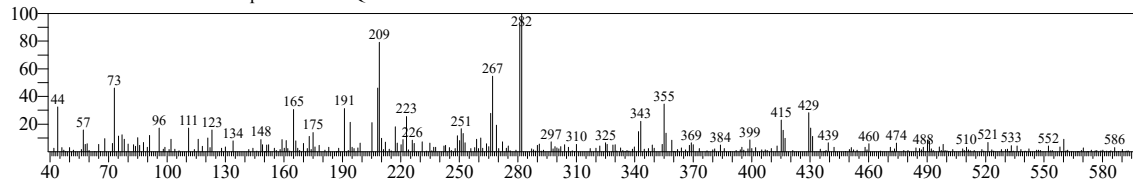

Hit#:1 Entry:341 Library:OA\_TMS\_DB5\_67min\_V3.lib

SI:37 Formula:C18H34O4Si3 CAS:3247-75-4 MolWeight:398 RetIndex:1864

CompName:3-(3-Hydroxyphenyl)-3-hydroxypropionic acid-3TMS ; 3-hydroxy-3-(3-hydroxyphenyl)propanoic acid

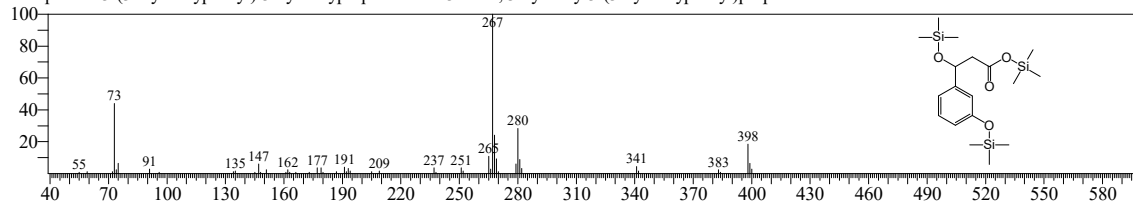

Hit#:2 Entry:211 Library:OA\_TMS\_DB5\_67min\_V3.lib

SI:37 Formula:C13H22O3Si2 CAS:99-96-7 MolWeight:282 RetIndex:1636

CompName:4-Hydroxybenzoic acid-2TMS ; 4-hydroxybenzoic acid

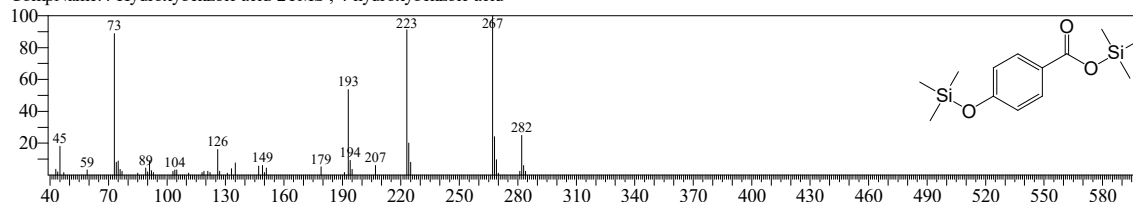

Hit#:3 Entry:203 Library:OA\_TMS\_DB5\_67min\_V3.lib

SI:36 Formula:C13H23NO2Si2 CAS:118-92-3 MolWeight:281 RetIndex:1623

CompName:Anthranilic acid-2TMS ; 2-aminobenzoic acid

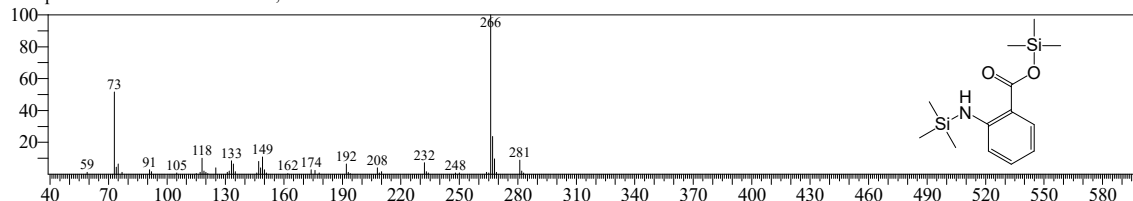

Hit#:4 Entry:402 Library:OA\_TMS\_DB5\_67min\_V3.lib

SI:35 Formula:C20H42O4Si4 CAS:775-01-9 MolWeight:458 RetIndex:1942

CompName:3,4-Dihydroxymandelic acid-4TMS ; 2-(3,4-dihydroxyphenyl)-2-hydroxyacetic acid

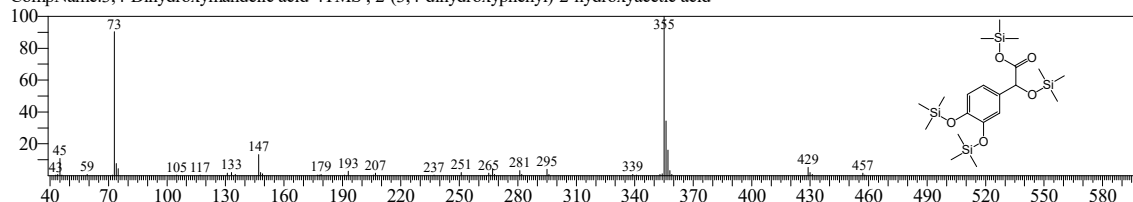

Hit#:5 Entry:179 Library:OA\_TMS\_DB5\_67min\_V3.lib

SI:35 Formula:C13H22O3Si2 CAS:99-06-9 MolWeight:282 RetIndex:1572

CompName:3-Hydroxybenzoic acid-2TMS ; 3-hydroxybenzoic acid

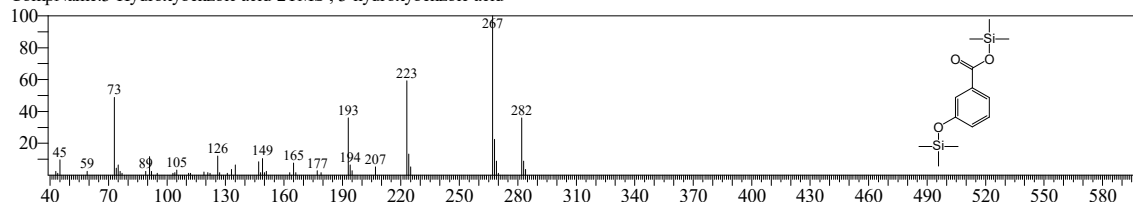

# TNAU

<< Target >>

Line#:33 R.Time:32.485(Scan#:5598) MassPeaks:303

RawMode:Averaged 32.480-32.490(5597-5599) BasePeak:208.00(1585)

BG Mode:Calc. from Peak Group 1 - Event 1 Q3 Scan

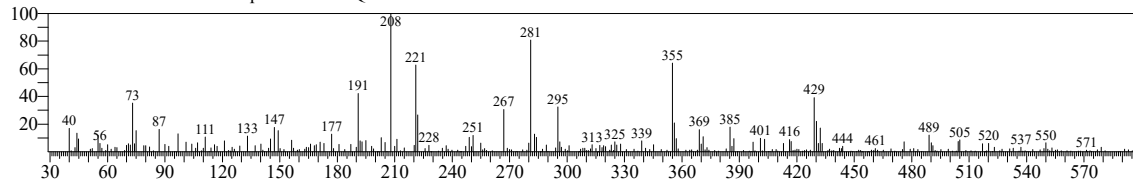

Hit#:1 Entry:402 Library:OA\_TMS\_DB5\_67min\_V3.lib

SI:44 Formula:C20H42O4Si4 CAS:775-01-9 MolWeight:458 RetIndex:1942

CompName:3,4-Dihydroxymandelic acid-4TMS ; 2-(3,4-dihydroxyphenyl)-2-hydroxyacetic acid

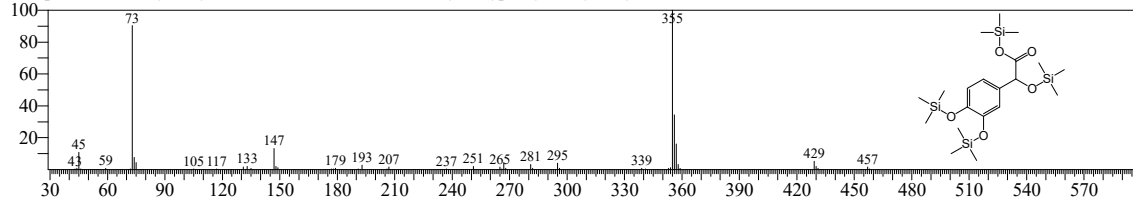

Hit#:2 Entry:343 Library:OA\_TMS\_DB5\_67min\_V3.lib

SI:43 Formula:C18H37NO3Si3 CAS:51-43-4 MolWeight:399 RetIndex:1868

CompName:Epinephrine-3TMS ; 4-[(1R)-1-hydroxy-2-(methylamino)ethyl]benzene-1,2-diol



Hit#:3 Entry:384 Library:OA\_TMS\_DB5\_67min\_V3.lib

SI:35 Formula:C17H35NO3Si3 CAS:65-23-6 MolWeight:385 RetIndex:1919

CompName:Pyridoxine-3TMS ; 4,5-bis(hydroxymethyl)-2-methylpyridin-3-ol

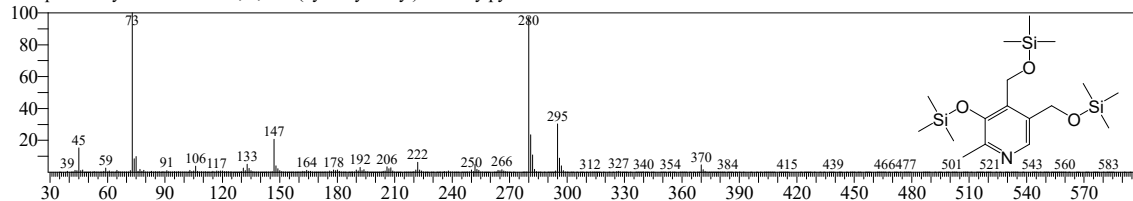

Hit#:4 Entry:328 Library:OA\_TMS\_DB5\_67min\_V3.lib

SI:34 Formula:C13H23NO2Si2 CAS:150-13-0 MolWeight:281 RetIndex:1845

CompName:4-Aminobenzoic acid-2TMS ; 4-aminobenzoic acid

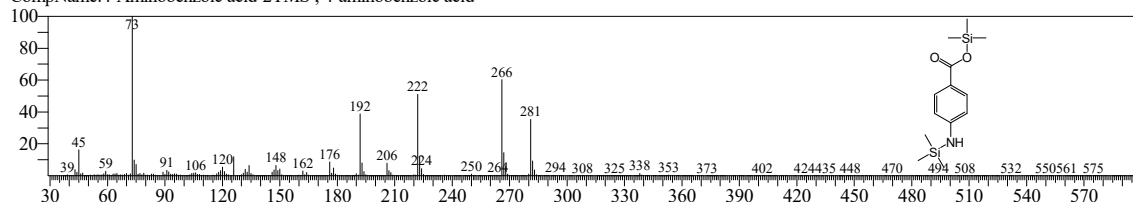

Hit#:5 Entry:143 Library:OA\_TMS\_DB5\_67min\_V3.lib

SI:31 Formula: CAS:0-00-0 MolWeight:354 RetIndex:1495

CompName:Malic acid-13C4-3TMS ;

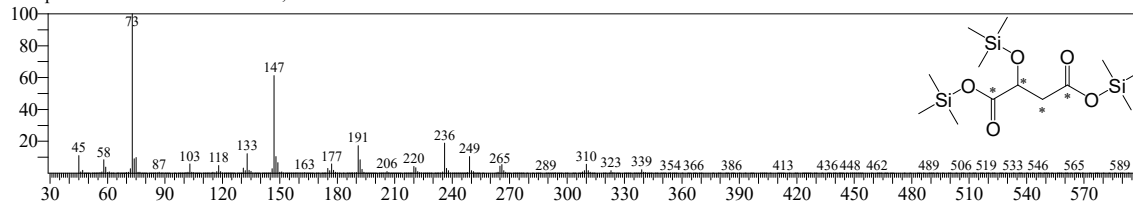

# TNAU

<< Target >>

Line#:34 R.Time:32.810(Scan#:5663) MassPeaks:311

RawMode:Averaged 32.805-32.815(5662-5664) BasePeak:207.05(1124)

BG Mode:Calc. from Peak Group 1 - Event 1 Q3 Scan

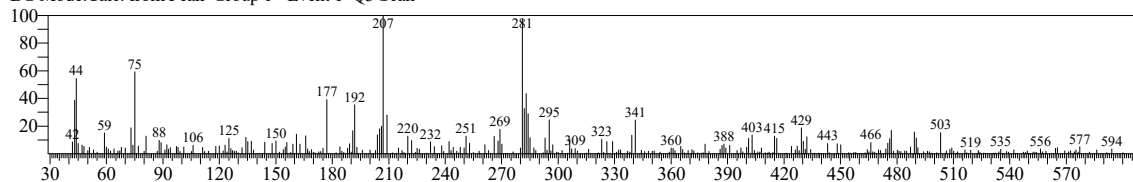

Hit#:1 Entry:328 Library:OA TMS DB5 67min V3.lib

SI:41 Formula:C13H23NO2Si2 CAS:150-13-0 MolWeight:281 RetIndex:1845

CompName:4-Aminobenzoic acid-2TMS ; 4-aminobenzoic acid



Hit#:2 Entry:290 Library:OA TMS DB5 67min V3.lib

SI:36 Formula:C13H23NO3Si2 CAS:548-93-6 MolWeight:297 RetIndex:1773

CompName:3-Hydroxyanthranilic acid-2TMS ; 2-amino-3-hydroxybenzoic acid

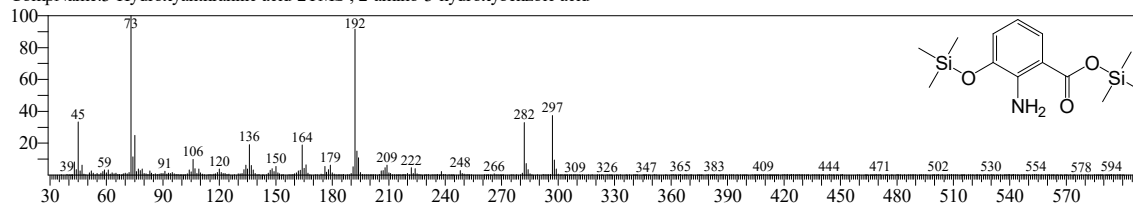

Hit#:3 Entry:384 Library:OA TMS DB5 67min V3.lib

SI:33 Formula:C17H35NO3Si3 CAS:65-23-6 MolWeight:385 RetIndex:1919

CompName:Pyridoxine-3TMS ; 4,5-bis(hydroxymethyl)-2-methylpyridin-3-ol

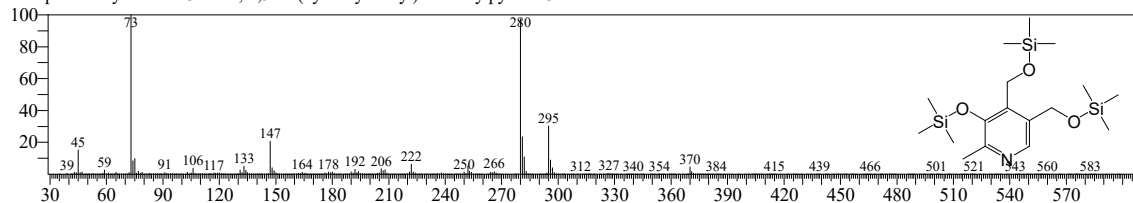

Hit#:4 Entry:343 Library:OA TMS DB5 67min V3.lib

SI:32 Formula:C18H37NO3Si3 CAS:51-43-4 MolWeight:399 RetIndex:1868

CompName:Epinephrine-3TMS ; 4-[(1R)-1-hydroxy-2-(methylamino)ethyl]benzene-1,2-diol

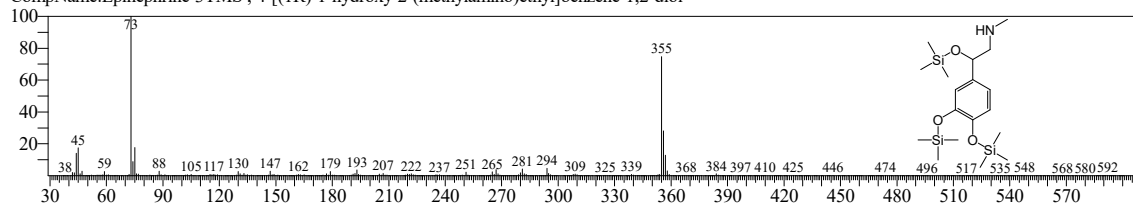

Hit#:5 Entry:339 Library:OA TMS DB5 67min V3.lib

SI:28 Formula:C13H18O3Si CAS:458-36-6 MolWeight:250 RetIndex:1859

CompName:Coniferyl aldehyde-TMS ; (E)-3-(4-hydroxy-3-methoxyphenyl)prop-2-enal

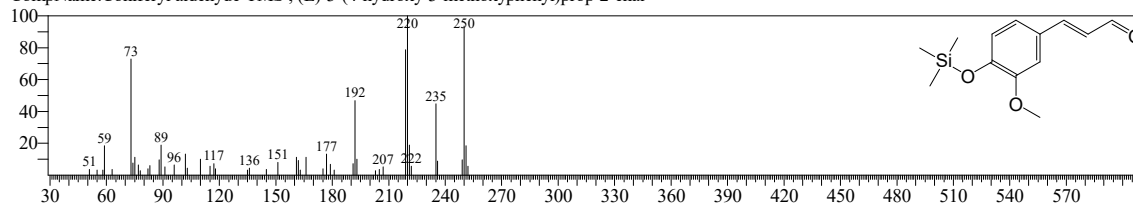

# TNAU

<< Target >>

Line#:35 R.Time:32.930(Scan#:5687) MassPeaks:294

RawMode:Averaged 32.925-32.935(5686-5688) BasePeak:281.00(1187)

BG Mode:Calc. from Peak Group 1 - Event 1 Q3 Scan

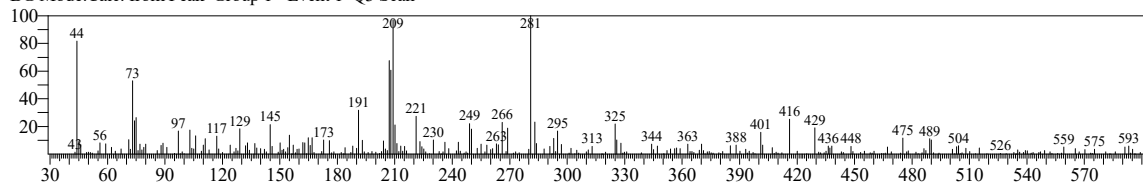

Hit#:1 Entry:528 Library:OA TMS DB5 67min V3.lib

SI:39 Formula:C17H28Cl2N2O5Si2 CAS:56-75-7 MolWeight:466 RetIndex:2508

CompName:Chloramphenicol-2TMS ; 2,2-dichloro-N-[(1R,2R)-1,3-dihydroxy-1-(4-nitrophenyl)propan-2-yl]acetamide

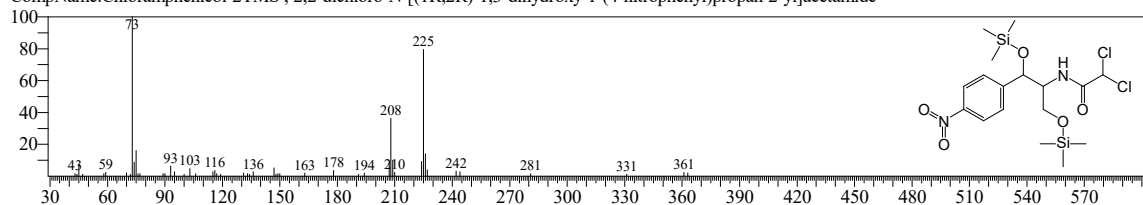

Hit#:2 Entry:328 Library:OA TMS DB5 67min V3.lib

SI:36 Formula:C13H23NO2Si2 CAS:150-13-0 MolWeight:281 RetIndex:1845

CompName:4-Aminobenzoic acid-2TMS ; 4-aminobenzoic acid

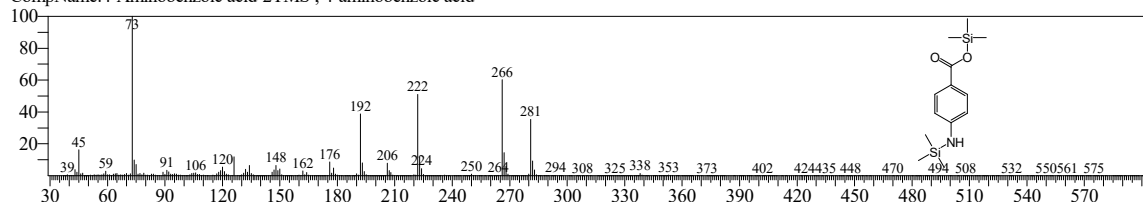

Hit#:3 Entry:384 Library:OA TMS DB5 67min V3.lib

SI:34 Formula:C17H35NO3Si3 CAS:65-23-6 MolWeight:385 RetIndex:1919

CompName:Pyridoxine-3TMS ; 4,5-bis(hydroxymethyl)-2-methylpyridin-3-ol

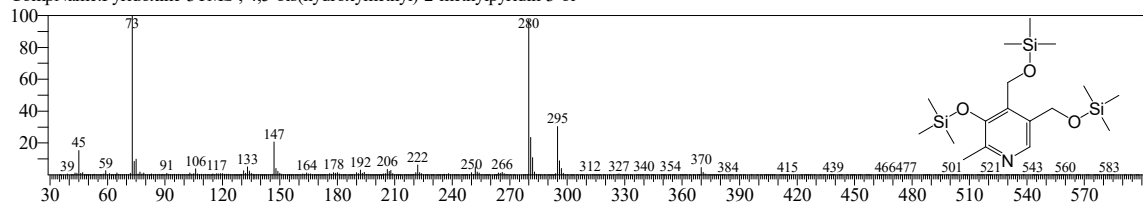

Hit#:4 Entry:566 Library:OA TMS DB5 67min V3.lib

SI:34 Formula:C19H36N5O6PSi3 CAS:60-92-4 MolWeight:545 RetIndex:3138

CompName:Adenosine 3',5'-cyclic monophosphate-3TMS ; (4aR,6R,7R,7aS)-6-(6-aminopurin-9-yl)-2-hydroxy-2-oxo-4a,6,7,7a-tetrahydro-4H-fur

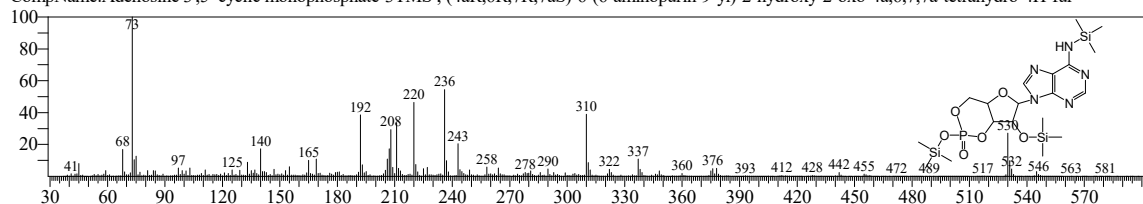

Hit#:5 Entry:506 Library:OA TMS DB5 67min V3.lib

SI:34 Formula:C19H36N2O4Si3 CAS:2147-61-7 MolWeight:440 RetIndex:2375

CompName:3-Hydroxy-kynurenine-3TMS ; 2-amino-4-(2-amino-3-hydroxyphenyl)-4-oxobutanoic acid

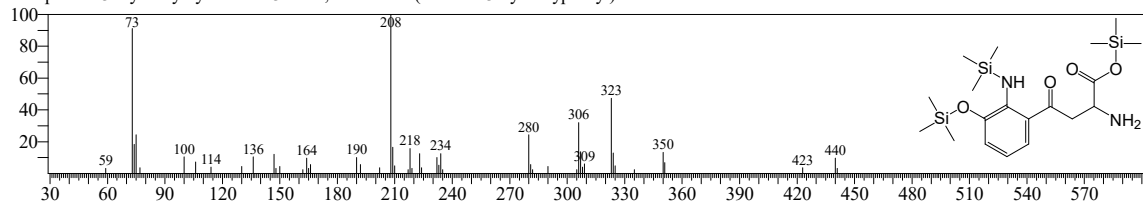

Supplement: Supplementary file 6 [file supplementary]
