# Supplementary material for: Comparative Metabolomics Profiling Reveals Key Metabolites and Associated Pathways Regulating Tuber Dormancy in White Yam (<em>Dioscorea rotundata</em>)
Source: Preprints.org preprint supplement (doi:10.20944/preprints202303.0378.v1), 2023-03-21

# TNAU

## Sample Information

Analyzed by : Admin  
 Analyzed : 05-Aug-22 5:15:33 AM  
 Sample Type : Unknown  
 Level # : 1  
 Sample Name : C Control  
 Sample ID : C Control  
 IS Amount : [1]=1  
 Sample Amount : 1  
 Dilution Factor : 1  
 Vial # : 20  
 Injection Volume : 1.00  
 Data File : D:\GCMS-8040NX\Aug 2022\Users\04.08.2022\Data files\04082022-020.qgd  
 Org Data File : D:\GCMS-8040NX\Aug 2022\Users\04.08.2022\Data files\04082022-020.qgd  
 Method File : D:\GCMS-8040NX\Aug 2022\Users\04.08.2022\Method file\27072022\_methodfile.qgm  
 Org Method File : D:\GCMS-8040NX\Aug 2022\Users\04.08.2022\Method file\27072022\_methodfile.qgm  
 Report File :  
 Tuning File : D:\GCMS-8040NX\Aug 2022\Tuning Data\TUNING 04082022.qgt  
 [Comment]  
 Jerry samples  
 Modified by : Admin  
 Modified : 05-Aug-22 4:50:50 PM

Chromatogram C Control D:\GCMS-8040NX\Aug 2022\Users\04.08.2022\Data files\04082022-020.qgd

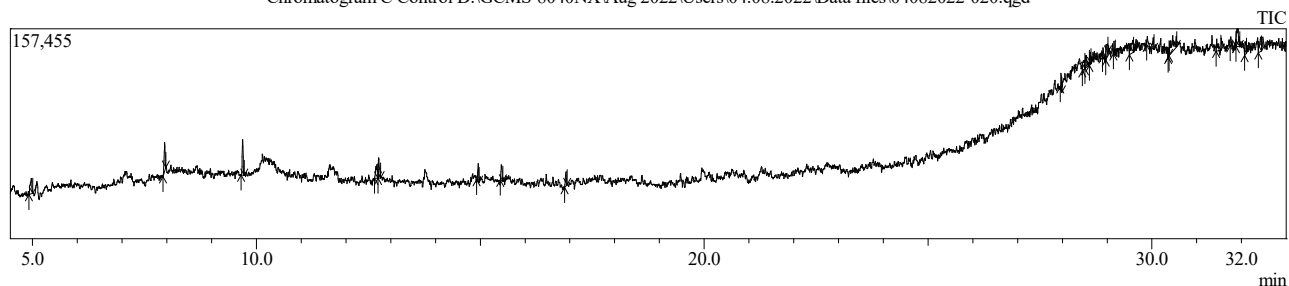

Peak Report TIC

| Peak# | R.Time | Area  | Area% | Height | Height% | A/H  | Similarity | Name                                        |
|-------|--------|-------|-------|--------|---------|------|------------|---------------------------------------------|
| 1     | 4.971  | 29976 | 5.48  | 11560  | 4.42    | 2.59 | 72         | 2-Propanol, 1,1'-oxybis-                    |
| 2     | 7.950  | 33568 | 6.13  | 21505  | 8.22    | 1.56 | 87         | Decane                                      |
| 3     | 9.693  | 41751 | 7.63  | 26905  | 10.29   | 1.55 | 89         | Undecane                                    |
| 4     | 12.665 | 29319 | 5.36  | 8789   | 3.36    | 3.34 | 47         | 4-Hydroxybenzoic acid-2TMS                  |
| 5     | 12.731 | 27061 | 4.94  | 15170  | 5.80    | 1.78 | 47         | 3,4-Dihydroxymandelic acid-4TMS             |
| 6     | 14.954 | 16503 | 3.01  | 13222  | 5.05    | 1.25 | 78         | Cycloheptasiloxane, tetradecamethyl-        |
| 7     | 15.470 | 19023 | 3.48  | 11861  | 4.53    | 1.60 | 79         | 2,4-Di-tert-butylphenol                     |
| 8     | 16.913 | 16544 | 3.02  | 10635  | 4.07    | 1.56 | 64         | 3,4-Dihydroxymandelic acid-4TMS             |
| 9     | 27.971 | 11474 | 2.10  | 12523  | 4.79    | 0.92 | 40         | 3,4-Dihydroxymandelic acid-4TMS             |
| 10    | 28.455 | 19289 | 3.52  | 5960   | 2.28    | 3.24 | 28         | 3-(3-Hydroxyphenyl)-3-hydroxypropionic acid |
| 11    | 28.515 | 22275 | 4.07  | 9121   | 3.49    | 2.44 | 32         | 3-(3-Hydroxyphenyl)-3-hydroxypropionic acid |
| 12    | 28.623 | 11833 | 2.16  | 8857   | 3.39    | 1.34 | 41         | 3,4-Dihydroxymandelic acid-4TMS             |
| 13    | 28.905 | 11175 | 2.04  | 6871   | 2.63    | 1.63 | 37         | 3-Hydroxyanthranilic acid-2TMS              |
| 14    | 29.009 | 20774 | 3.80  | 7484   | 2.86    | 2.78 | 31         | Shikimic acid-4TMS                          |
| 15    | 29.152 | 9652  | 1.76  | 9621   | 3.68    | 1.00 | 31         | 3-Hydroxybenzoic acid-2TMS                  |
| 16    | 29.568 | 34282 | 6.26  | 9478   | 3.62    | 3.62 | 33         | 3,4-Dihydroxymandelic acid-4TMS             |
| 17    | 29.897 | 19265 | 3.52  | 6874   | 2.63    | 2.80 | 37         | 4-Aminobenzoic acid-2TMS                    |
| 18    | 30.370 | 6349  | 1.16  | 5171   | 1.98    | 1.23 | 25         | Protocatechuic acid-3TMS                    |
| 19    | 30.462 | 59518 | 10.87 | 11765  | 4.50    | 5.06 | 37         | Homovanillic acid-2TMS                      |
| 20    | 31.445 | 12750 | 2.33  | 9105   | 3.48    | 1.40 | 38         | 3-Hydroxybenzoic acid-2TMS                  |
| 21    | 31.755 | 9505  | 1.74  | 5589   | 2.14    | 1.70 | 30         | Hypoxanthine-2TMS                           |
| 22    | 31.908 | 43503 | 7.95  | 13114  | 5.01    | 3.32 | 36         | 3-Hydroxybenzoic acid-2TMS                  |

# TNAU

| Peak# | R.Time | Area   | Area%  | Height | Height% | A/H  | Similarity | Name                    |
|-------|--------|--------|--------|--------|---------|------|------------|-------------------------|
| 23    | 32.083 | 14756  | 2.70   | 9715   | 3.71    | 1.52 | 42         | Glycerol-3TMS           |
| 24    | 32.428 | 27248  | 4.98   | 10686  | 4.09    | 2.55 | 38         | 3-Phenylactic acid-2TMS |
|       |        | 547393 | 100.00 | 261581 | 100.00  |      |            |                         |

## Library

<< Target >>

Line#:1 R.Time:4.970(Scan#:95) MassPeaks:239

RawMode:Averaged 4.965-4.975(94-96) BasePeak:89.10(3084)

BG Mode:Calc. from Peak Group 1 - Event 1 Q3 Scan

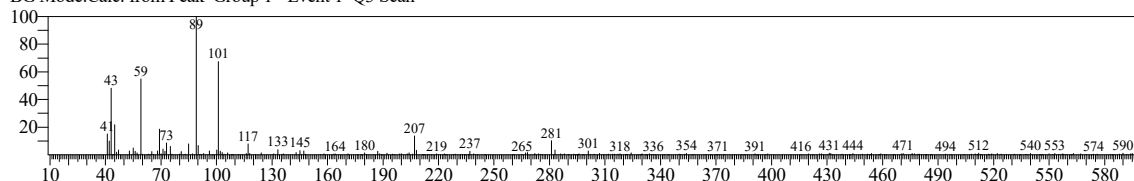

Hit#:1 Entry:7425 Library:NIST20R.lib

SI:72 Formula:C6H14O3 CAS:110-98-5 MolWeight:134 RetIndex:1018

CompName:2-Propanol, 1,1'-oxybis- 2-Propanol, 1,1'-oxydi- Bis(2-hydroxypropyl) ether 1,1'-Oxydi-2-propanol 2,2'-Dihydroxydipropyl ether

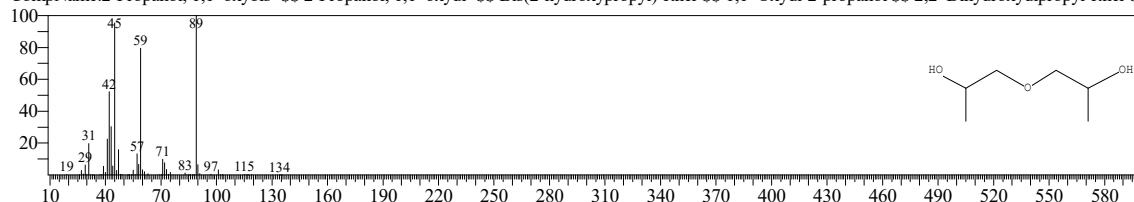

Hit#:2 Entry:81501 Library:NIST20M1.lib

SI:71 Formula:C13H28OSi CAS:0-00-0 MolWeight:228 RetIndex:1097

CompName:4-Methoxy-6-methyl-3-(trimethylsilyl)methyl-1-heptene

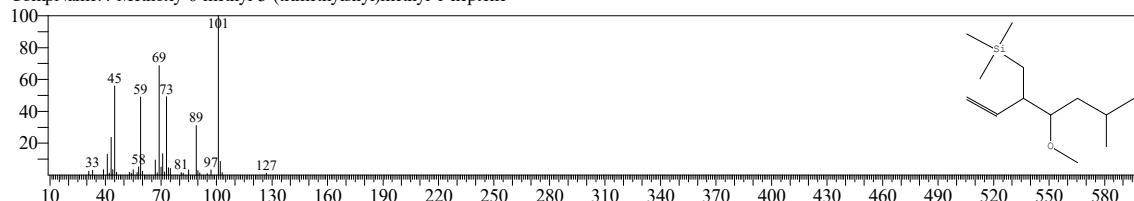

Hit#:3 Entry:22897 Library:NIST20M1.lib

SI:71 Formula:C8H16O3 CAS:0-00-0 MolWeight:160 RetIndex:931

CompName:2-Hydroxyisocaproic acid, methyl ether, methyl ester

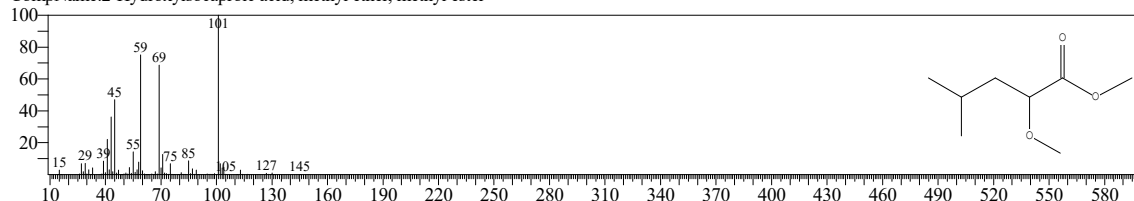

Hit#:4 Entry:9263 Library:NIST20M1.lib

SI:71 Formula:C6H12O3 CAS:21983-72-2 MolWeight:132 RetIndex:821

CompName:3,3-Dimethoxy-2-butanone

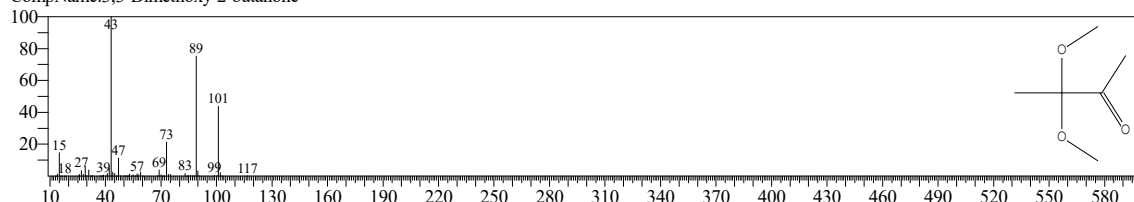

# TNAU

<< Target >>

Line#:1 R.Time:4.970(Scan#:95) MassPeaks:239

RawMode:Averaged 4.965-4.975(94-96) BasePeak:89.10(3084)

BG Mode:Calc. from Peak Group 1 - Event 1 Q3 Scan

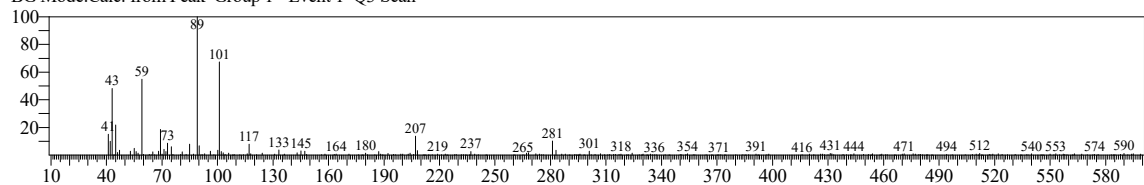

Hit#:5 Entry:16032 Library:NIST20M1.lib

SI:70 Formula:C7H16O3 CAS:6607-66-5 MolWeight:148 RetIndex:860

CompName:1,3,3-Trimethoxybutane \$\$ Butane, 1,3,3-trimethoxy-

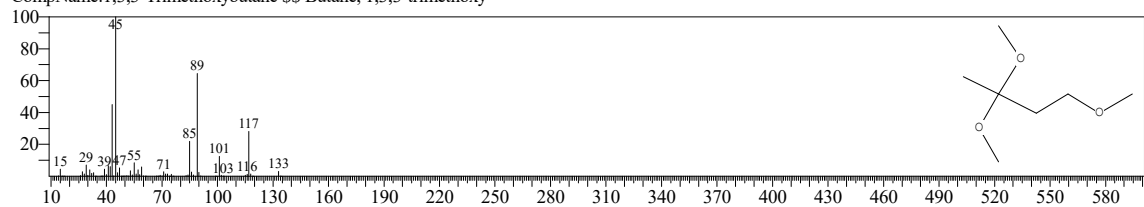

# TNAU

<< Target >>

Line# 2 R.Time: 7.950 (Scan#: 691) MassPeaks: 264

RawMode: Averaged 7.945-7.955 (690-692) BasePeak: 57.05 (4332)

BG Mode: Calc. from Peak Group 1 - Event 1 Q3 Scan

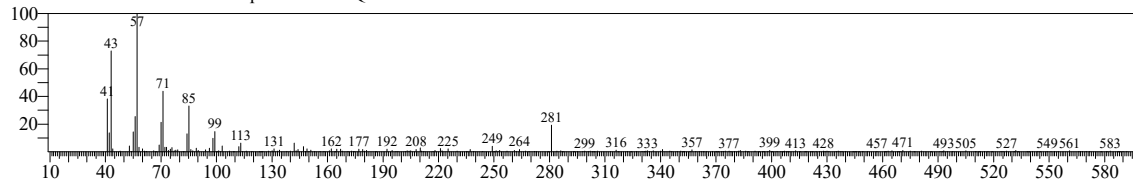

Hit#: 1 Entry: 13604 Library: NIST20M1.lib

SI: 87 Formula: C<sub>10</sub>H<sub>22</sub> CAS: 124-18-5 MolWeight: 142 RetIndex: 1000

CompName: Decane \$ n-Decane \$ n-C<sub>10</sub>H<sub>22</sub> \$ UN 2247

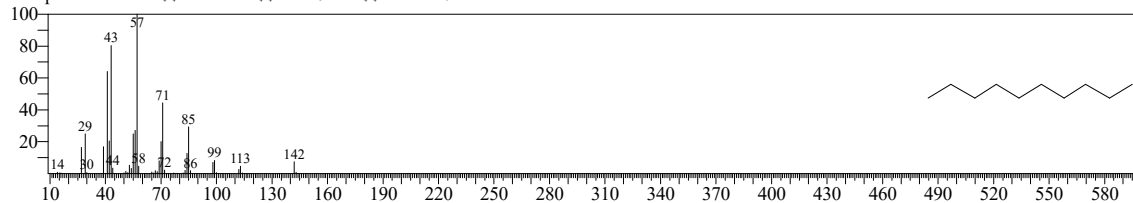

Hit#: 2 Entry: 12897 Library: NIST20R.lib

SI: 86 Formula: C<sub>11</sub>H<sub>24</sub> CAS: 1120-21-4 MolWeight: 156 RetIndex: 1100

CompName: Undecane \$ n-Undecane \$ Hendecane \$ n-C<sub>11</sub>H<sub>24</sub> \$ UN 2330

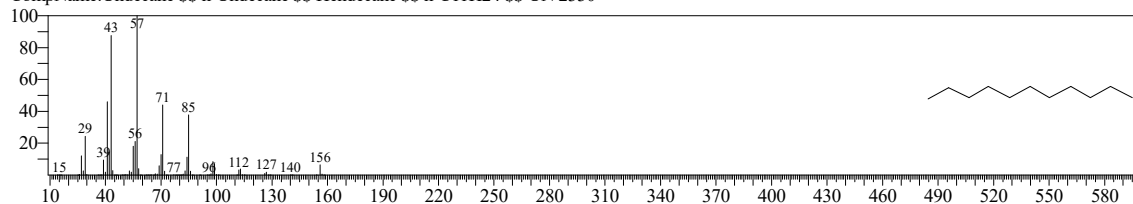

Hit#: 3 Entry: 30057 Library: NIST20M1.lib

SI: 85 Formula: C<sub>12</sub>H<sub>26</sub> CAS: 112-40-3 MolWeight: 170 RetIndex: 1200

CompName: Dodecane \$ n-Dodecane \$ Adakane 12 \$ Ba 51-090453 \$ CH<sub>3</sub>(CH<sub>2</sub>)<sub>10</sub>CH<sub>3</sub> \$ Bihexyl \$ Dihexyl \$ Duodecane \$ NSC 8714

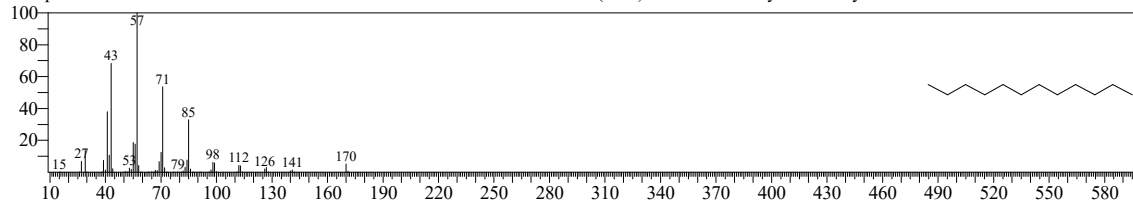

Hit#: 4 Entry: 19410 Library: NIST20R.lib

SI: 85 Formula: C<sub>13</sub>H<sub>28</sub> CAS: 629-50-5 MolWeight: 184 RetIndex: 1300

CompName: Tridecane \$ n-Tridecane \$ Tridecane, n-

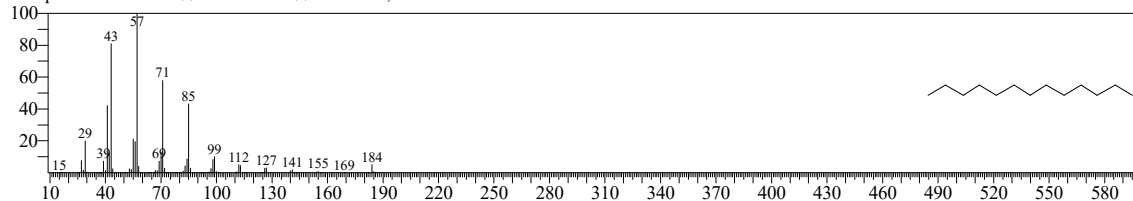

Hit#: 5 Entry: 9465 Library: NIST20R.lib

SI: 85 Formula: C<sub>10</sub>H<sub>22</sub> CAS: 15869-93-9 MolWeight: 142 RetIndex: 887

CompName: Octane, 3,5-dimethyl- \$ 3,5-Dimethyloctane

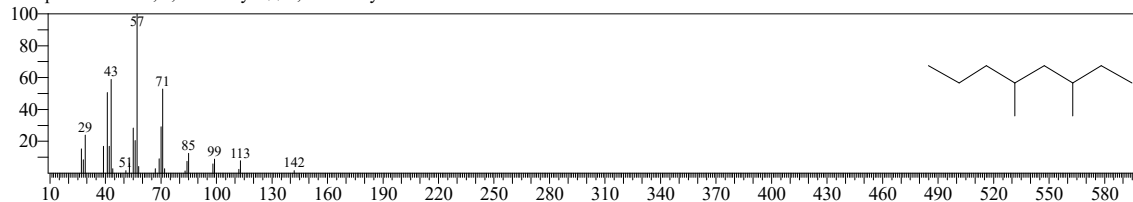

# TNAU

<< Target >>

Line# 3 R.Time: 9.695 (Scan#: 1040) MassPeaks: 340

Raw Mode: Averaged 9.690-9.700 (1039-1041) BasePeak: 57.10 (5253)

BG Mode: Calc. from Peak Group 1 - Event 1 Q3 Scan

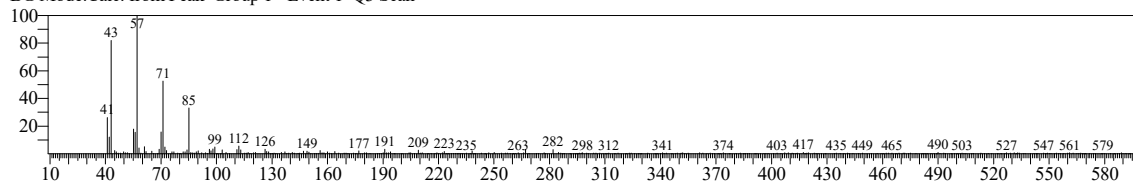

Hit#: 1 Entry: 21042 Library: NIST20M1.lib

SI: 89 Formula: C<sub>11</sub>H<sub>24</sub> CAS: 1120-21-4 MolWeight: 156 RetIndex: 1100

CompName: Undecane \$\$ n-Undecane \$\$ Hendecane \$\$ n-C<sub>11</sub>H<sub>24</sub> \$\$ UN 2330

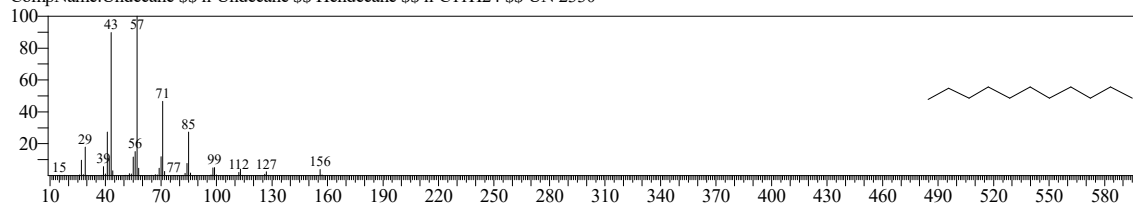

Hit#: 2 Entry: 19412 Library: NIST20R.lib

SI: 89 Formula: C<sub>13</sub>H<sub>28</sub> CAS: 629-50-5 MolWeight: 184 RetIndex: 1300

CompName: Tridecane \$\$ n-Tridecane \$\$ Tridecane, n-

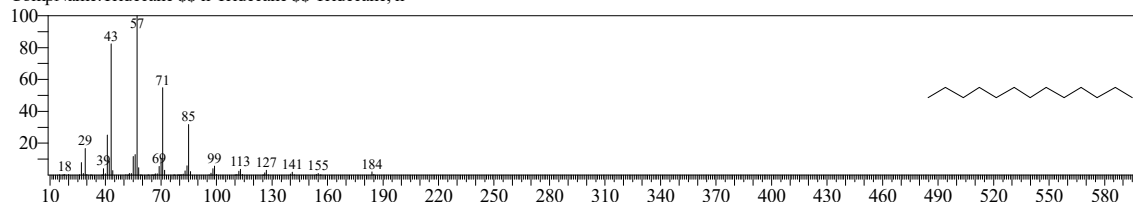

Hit#: 3 Entry: 27737 Library: NIST20R.lib

SI: 89 Formula: C<sub>16</sub>H<sub>34</sub> CAS: 544-76-3 MolWeight: 226 RetIndex: 1600

CompName: Hexadecane \$\$ n-Cetane \$\$ n-Hexadecane \$\$ Cetane

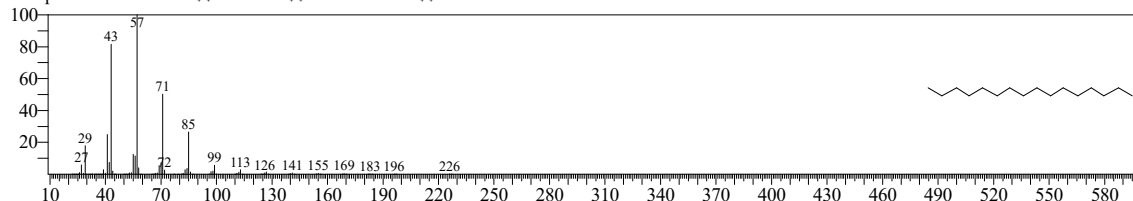

Hit#: 4 Entry: 16192 Library: NIST20R.lib

SI: 88 Formula: C<sub>12</sub>H<sub>26</sub> CAS: 112-40-3 MolWeight: 170 RetIndex: 1200

CompName: Dodecane \$\$ n-Dodecane \$\$ Adakane 12 \$\$ Ba 51-090453 \$\$ CH<sub>3</sub>(CH<sub>2</sub>)<sub>10</sub>CH<sub>3</sub> \$\$ Bihexyl \$\$ Dihexyl \$\$ Duodecane \$\$ NSC 8714

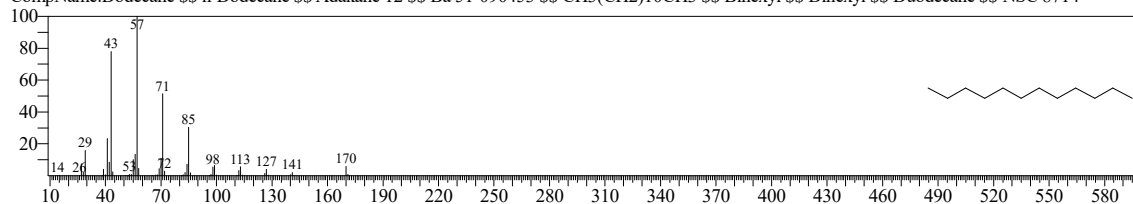

Hit#: 5 Entry: 34259 Library: NIST20R.lib

SI: 87 Formula: C<sub>20</sub>H<sub>42</sub> CAS: 112-95-8 MolWeight: 282 RetIndex: 2000

CompName: Eicosane \$\$ n-Eicosane \$\$ Icosane # \$\$ n-Icosane

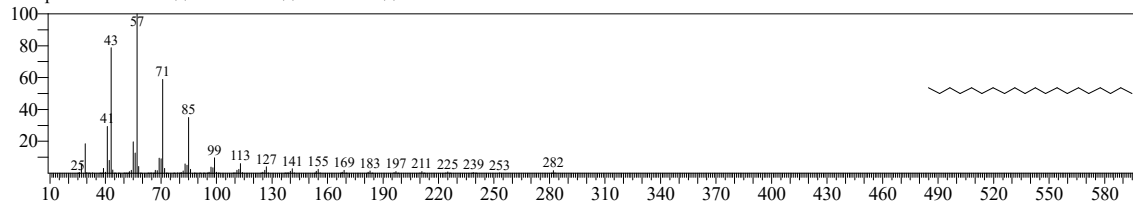

# TNAU

<< Target >>

Line#:4 R.Time:12.665(Scan#:1634) MassPeaks:309

RawMode:Averaged 12.660-12.670(1633-1635) BasePeak:281.05(794)

BG Mode:Calc. from Peak Group 1 - Event 1 Q3 Scan

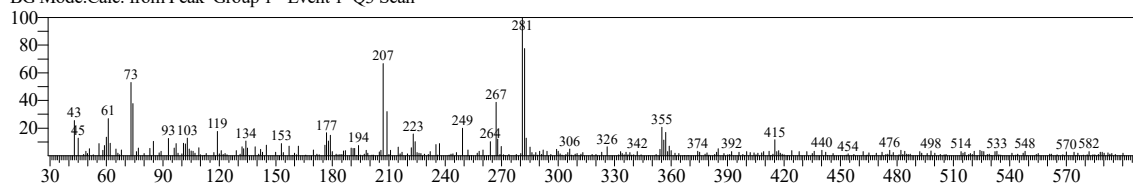

Hit#:1 Entry:211 Library:OA\_TMS\_DB5\_67min\_V3.lib

SI:47 Formula:C<sub>13</sub>H<sub>22</sub>O<sub>3</sub>Si<sub>2</sub> CAS:99-96-7 MolWeight:282 RetIndex:1636

CompName:4-Hydroxybenzoic acid-2TMS ; 4-hydroxybenzoic acid

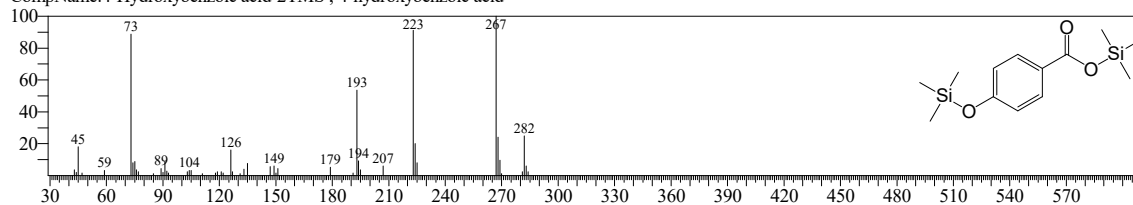

Hit#:2 Entry:402 Library:OA\_TMS\_DB5\_67min\_V3.lib

SI:44 Formula:C<sub>20</sub>H<sub>42</sub>O<sub>4</sub>Si<sub>4</sub> CAS:775-01-9 MolWeight:458 RetIndex:1942

CompName:3,4-Dihydroxymandelic acid-4TMS ; 2-(3,4-dihydroxyphenyl)-2-hydroxyacetic acid

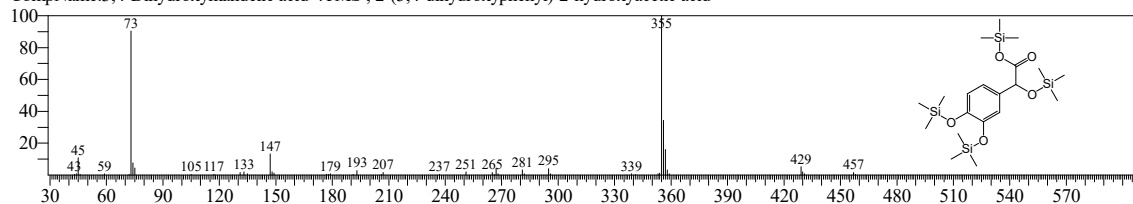

Hit#:3 Entry:328 Library:OA\_TMS\_DB5\_67min\_V3.lib

SI:44 Formula:C<sub>13</sub>H<sub>23</sub>NO<sub>2</sub>Si<sub>2</sub> CAS:150-13-0 MolWeight:281 RetIndex:1845

CompName:4-Aminobenzoic acid-2TMS ; 4-aminobenzoic acid

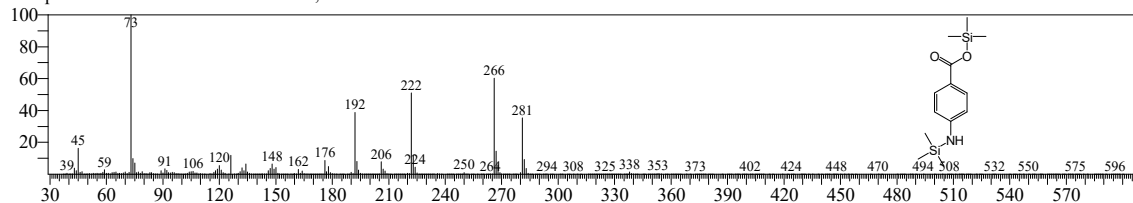

Hit#:4 Entry:179 Library:OA\_TMS\_DB5\_67min\_V3.lib

SI:43 Formula:C<sub>13</sub>H<sub>22</sub>O<sub>3</sub>Si<sub>2</sub> CAS:99-06-9 MolWeight:282 RetIndex:1572

CompName:3-Hydroxybenzoic acid-2TMS ; 3-hydroxybenzoic acid

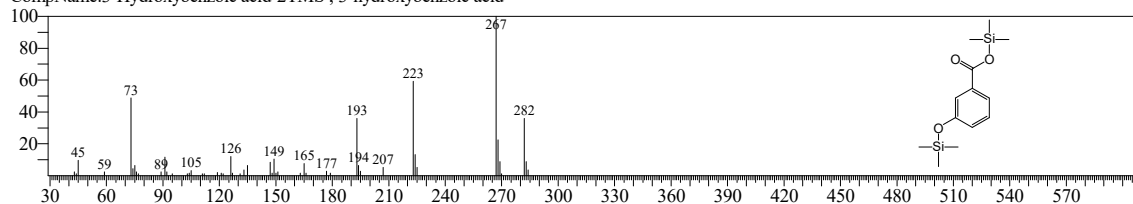

Hit#:5 Entry:343 Library:OA\_TMS\_DB5\_67min\_V3.lib

SI:43 Formula:C<sub>18</sub>H<sub>37</sub>NO<sub>3</sub>Si<sub>3</sub> CAS:51-43-4 MolWeight:399 RetIndex:1868

CompName:Epinephrine-3TMS ; 4-[(1R)-1-hydroxy-2-(methylamino)ethyl]benzene-1,2-diol

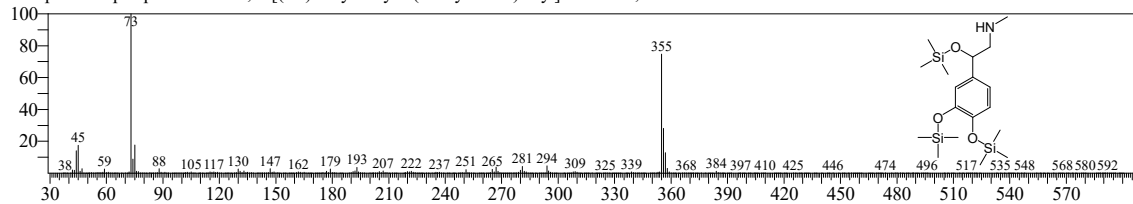

# TNAU

<< Target >>

Line#:5 R.Time:12.730(Scan#:1647) MassPeaks:302

RawMode:Averaged 12.725-12.735(1646-1648) BasePeak:73.10(1519)

BG Mode:Calc. from Peak Group 1 - Event 1 Q3 Scan

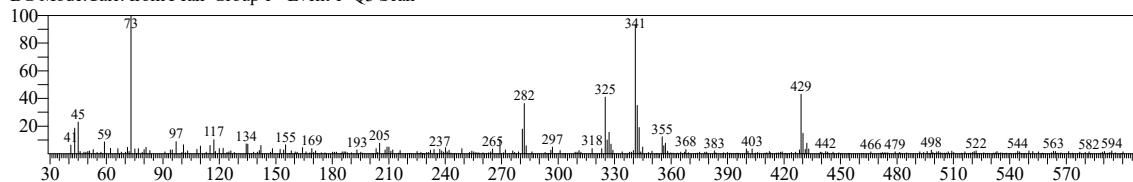

Hit#:1 Entry:402 Library:OA\_TMS\_DB5\_67min\_V3.lib

SI:47 Formula:C20H42O4Si4 CAS:775-01-9 MolWeight:458 RetIndex:1942

CompName:3,4-Dihydroxymandelic acid-4TMS ; 2-(3,4-dihydroxyphenyl)-2-hydroxyacetic acid

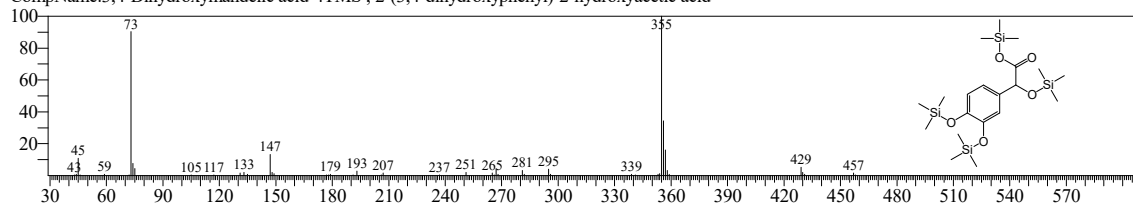

Hit#:2 Entry:173 Library:OA\_TMS\_DB5\_67min\_V3.lib

SI:42 Formula:C15H30O3Si3 CAS:87-66-1 MolWeight:342 RetIndex:1559

CompName:Pyrogallol-3TMS ; benzene-1,2,3-triol

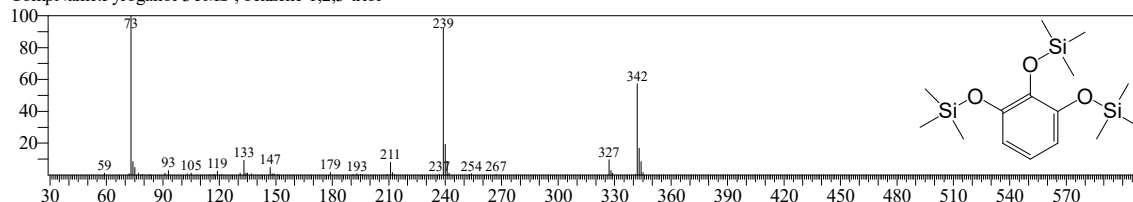

Hit#:3 Entry:491 Library:OA\_TMS\_DB5\_67min\_V3.lib

SI:40 Formula:C21H44O2Si CAS:57-11-4 MolWeight:356 RetIndex:2244

CompName:Stearic acid-TMS ; octadecanoic acid

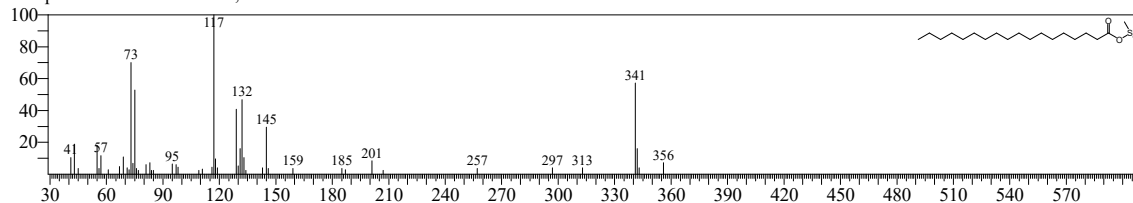

Hit#:4 Entry:343 Library:OA\_TMS\_DB5\_67min\_V3.lib

SI:40 Formula:C18H37NO3Si3 CAS:51-43-4 MolWeight:399 RetIndex:1868

CompName:Epinephrine-3TMS ; 4-[(1R)-1-hydroxy-2-(methylamino)ethyl]benzene-1,2-diol

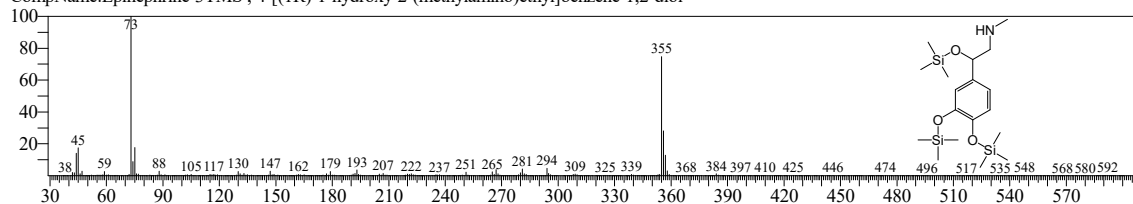

Hit#:5 Entry:332 Library:OA\_TMS\_DB5\_67min\_V3.lib

SI:38 Formula:C17H32O4Si3 CAS:451-13-8 MolWeight:384 RetIndex:1850

CompName:Homogentisic acid-3TMS ; 2-(2,5-dihydroxyphenyl)acetic acid

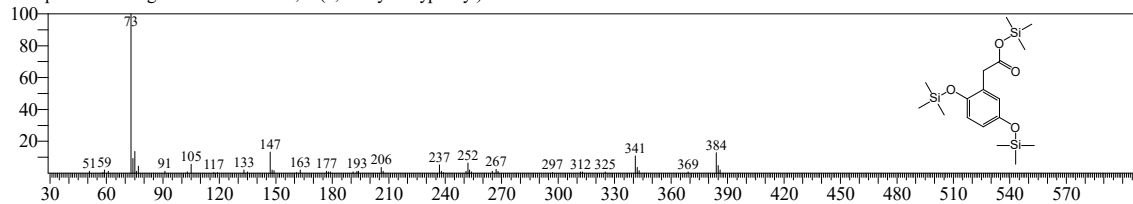

# TNAU

<< Target >>

Line#:6 R.Time:14.955(Scan#:2092) MassPeaks:306

RawMode:Averaged 14.950-14.960(2091-2093) BasePeak:281.00(1703)

BG Mode:Calc. from Peak Group 1 - Event 1 Q3 Scan

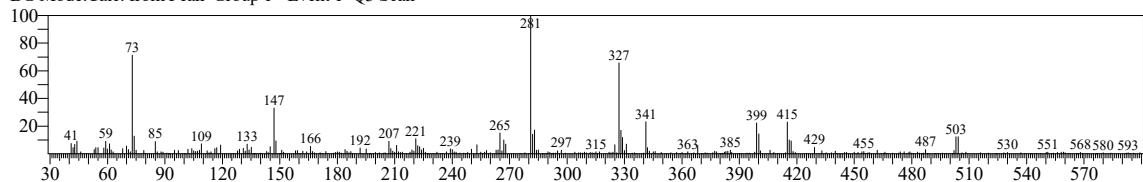

Hit#:1 Entry:43264 Library:NIST20R.lib

SI:78 Formula:C14H42O7Si7 CAS:107-50-6 MolWeight:518 RetIndex:1447

CompName:Cycloheptasiloxane, tetradecamethyl- \$S\$ 2,2,4,4,6,6,8,8,10,10,12,12,14,14-Tetradecamethylcycloheptasiloxane # \$S\$ Tetradecamethylcyclohept

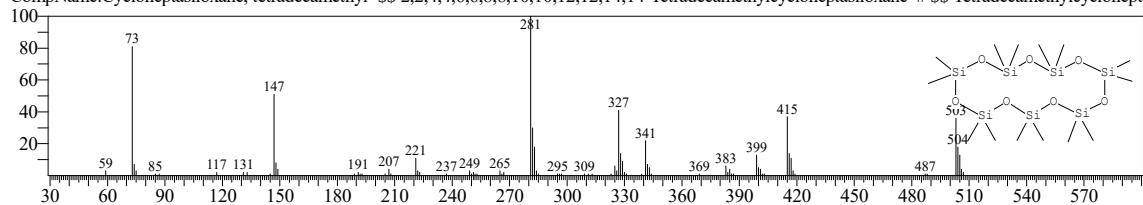

Hit#:2 Entry:438 Library:OA TMS\_DB5\_67min\_V3.lib

SI:42 Formula:C12H22N2O2Si2 CAS:104-98-3 MolWeight:282 RetIndex:2014

CompName:Urocanic acid-2TMS ; (E)-3-(1H-imidazol-5-yl)prop-2-enoic acid

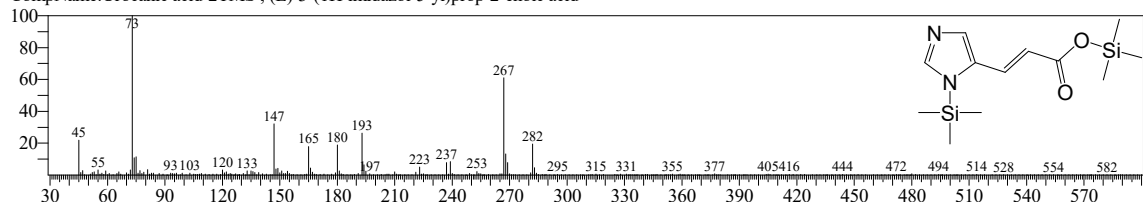

Hit#:3 Entry:328 Library:OA TMS\_DB5\_67min\_V3.lib

SI:41 Formula:C13H23NO2Si2 CAS:150-13-0 MolWeight:281 RetIndex:1845

CompName:4-Aminobenzoic acid-2TMS ; 4-aminobenzoic acid

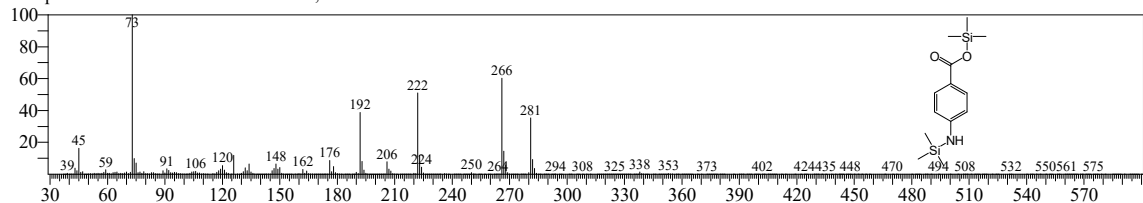

Hit#:4 Entry:184 Library:OA TMS\_DB5\_67min\_V3.lib

SI:41 Formula:C14H24O3Si2 CAS:614-75-5 MolWeight:296 RetIndex:1579

CompName:2-Hydroxyphenylacetic acid-2TMS ; 2-(2-hydroxyphenyl)acetic acid

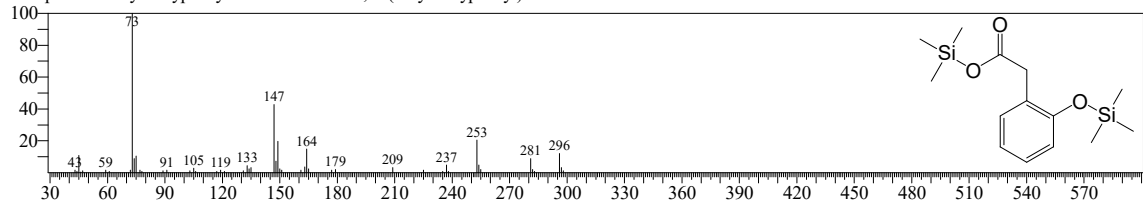

Hit#:5 Entry:211 Library:OA TMS\_DB5\_67min\_V3.lib

SI:40 Formula:C13H22O3Si2 CAS:99-96-7 MolWeight:282 RetIndex:1636

CompName:4-Hydroxybenzoic acid-2TMS ; 4-hydroxybenzoic acid

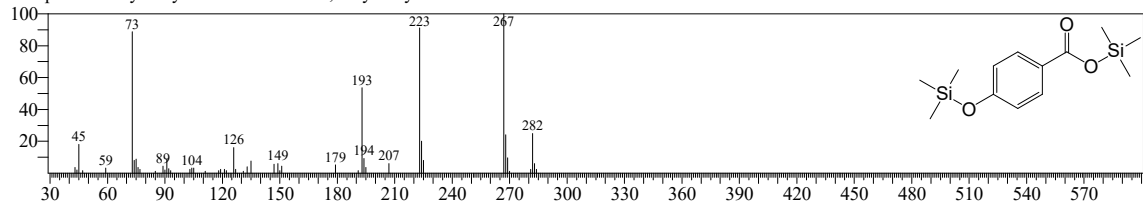



# TNAU

<< Target >>

Line#:7 R.Time:15.470(Scan#:2195) MassPeaks:287

RawMode:Averaged 15.465-15.475(2194-2196) BasePeak:191.10(4177)

BG Mode:Calc. from Peak Group 1 - Event 1 Q3 Scan

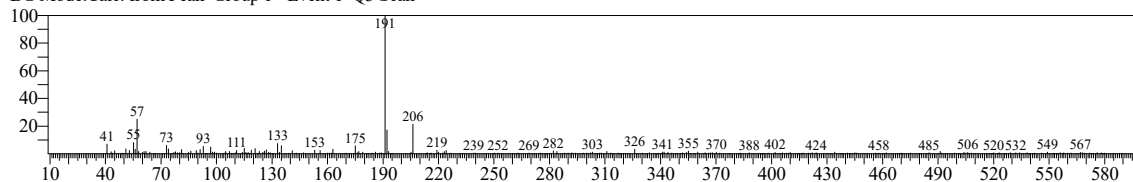

Hit#:1 Entry:24086 Library:NIST20R.lib

SI:79 Formula:C14H22O CAS:96-76-4 MolWeight:206 RetIndex:1555

CompName:2,4-Di-tert-butylphenol \$\$ Phenol, 2,4-bis(1,1-dimethylethyl)- \$\$ Phenol, 2,4-di-tert-butyl- \$\$ 2,4-di-t-Butylphenol \$\$ 1-Hydroxy-2,4-di-tert-bu

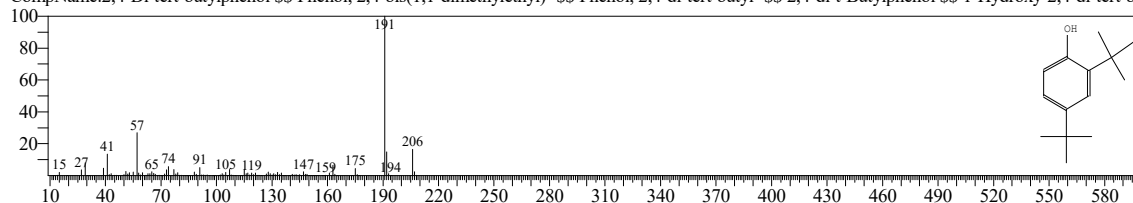

Hit#:2 Entry:24110 Library:NIST20R.lib

SI:78 Formula:C14H22O CAS:1138-52-9 MolWeight:206 RetIndex:1555

CompName:Phenol, 3,5-bis(1,1-dimethylethyl)- \$\$ Phenol, 3,5-di-tert-butyl- \$\$ 3,5-Di-tert-butylphenol \$\$ Phenol, 3,5-bis(t-butyl) \$\$ 3,5-Di-t-butylphenol \$

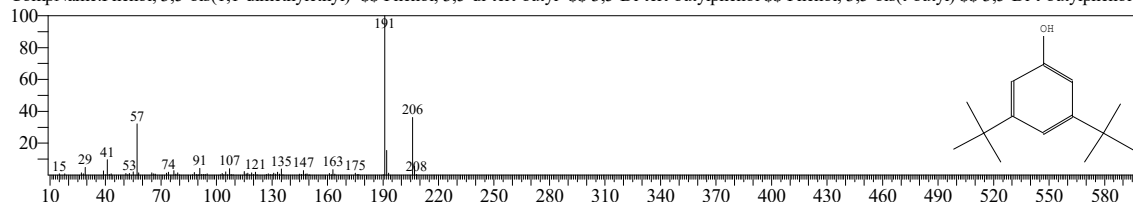

Hit#:3 Entry:24098 Library:NIST20R.lib

SI:77 Formula:C14H22O CAS:5875-45-6 MolWeight:206 RetIndex:1555

CompName:Phenol, 2,5-bis(1,1-dimethylethyl)- \$\$ Phenol, 2,5-di-tert-butyl- \$\$ 2,5-Di-tert-butylphenol \$\$ 2,5-bis(1,1-Dimethylethyl)phenol

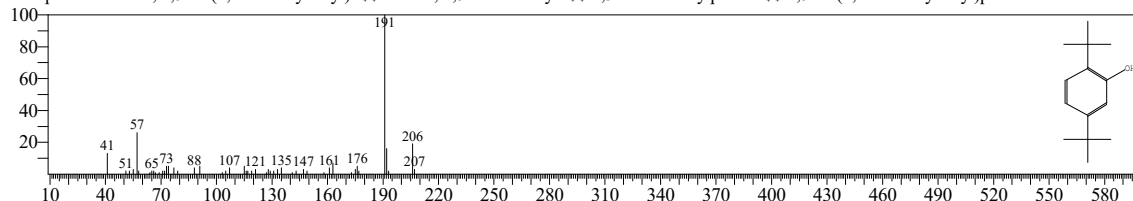

Hit#:4 Entry:170993 Library:NIST20M1.lib

SI:77 Formula:C19H30O3 CAS:166273-38-7 MolWeight:306 RetIndex:2255

CompName:Pentanoic acid, 5-hydroxy-, 2,4-di-t-butylphenyl esters \$\$ 2,4-Di-tert-butylphenyl 5-hydroxypentanoate #

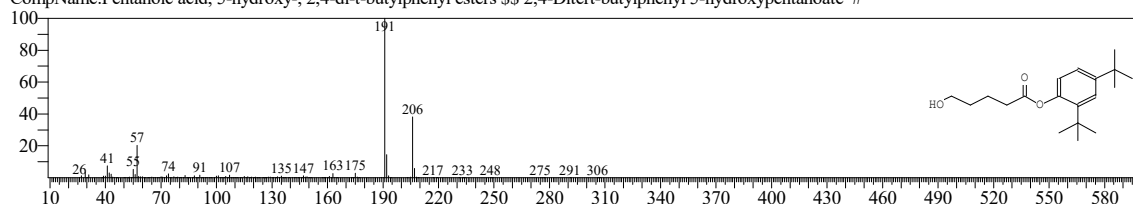

Hit#:5 Entry:187279 Library:NIST20M1.lib

SI:77 Formula:C19H28O4 CAS:0-00-0 MolWeight:320 RetIndex:2369

CompName:Pentanedioic acid, (2,4-di-t-butylphenyl) mono-ester \$\$ 5-(2,4-Di-tert-butylphenoxy)-5-oxopentanoic acid #

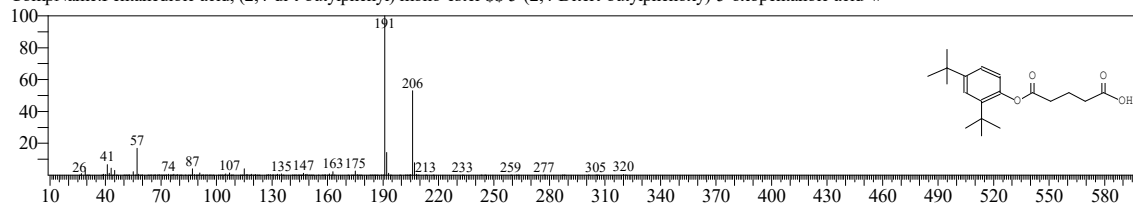

# TNAU

<< Target >>

Line#:8 R.Time:16.915(Scan#:2484) MassPeaks:312

RawMode:Averaged 16.910-16.920(2483-2485) BasePeak:355.05(1425)

BG Mode:Calc. from Peak Group 1 - Event 1 Q3 Scan

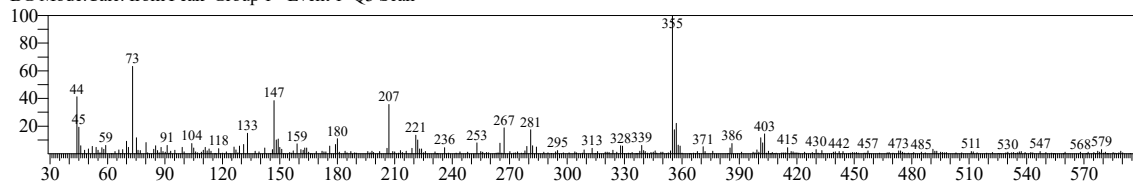

Hit#:1 Entry:402 Library:OA\_TMS\_DB5\_67min\_V3.lib

SI:64 Formula:C20H42O4Si4 CAS:775-01-9 MolWeight:458 RetIndex:1942

CompName:3,4-Dihydroxymandelic acid-4TMS ; 2-(3,4-dihydroxyphenyl)-2-hydroxyacetic acid

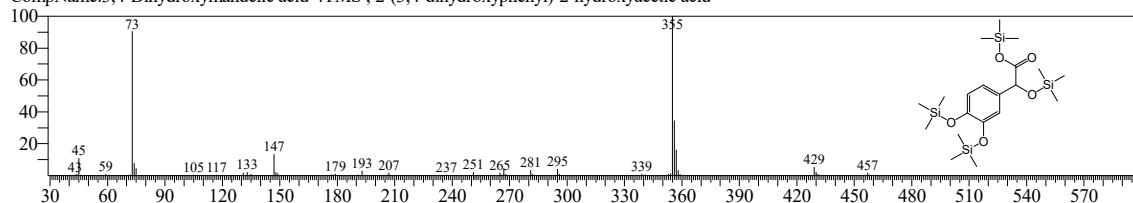

Hit#:2 Entry:343 Library:OA\_TMS\_DB5\_67min\_V3.lib

SI:63 Formula:C18H37NO3Si3 CAS:51-43-4 MolWeight:399 RetIndex:1868

CompName:Epinephrine-3TMS ; 4-[(1R)-1-hydroxy-2-(methylamino)ethyl]benzene-1,2-diol

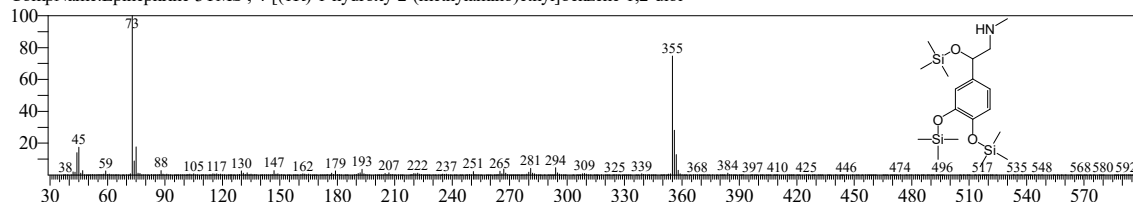

Hit#:3 Entry:382 Library:OA\_TMS\_DB5\_67min\_V3.lib

SI:47 Formula:C18H34O4Si3 CAS:6482-98-0 MolWeight:398 RetIndex:1918

CompName:4-Hydroxyphenyllactic acid-3TMS ; 2-hydroxy-3-(4-hydroxyphenyl)propanoate

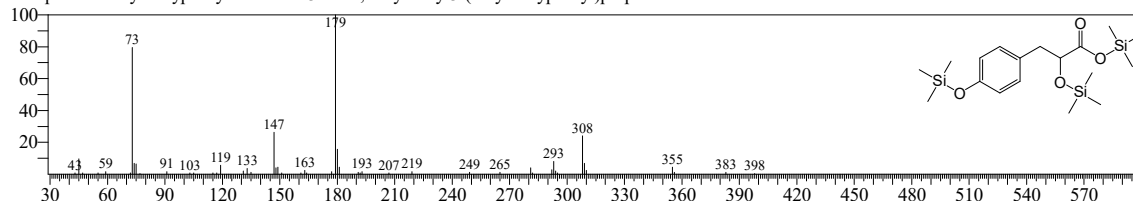

Hit#:4 Entry:138 Library:OA\_TMS\_DB5\_67min\_V3.lib

SI:46 Formula:C14H24O3Si2 CAS:90-64-2 MolWeight:296 RetIndex:1486

CompName:Mandelic acid-2TMS ; 2-hydroxy-2-phenylacetic acid

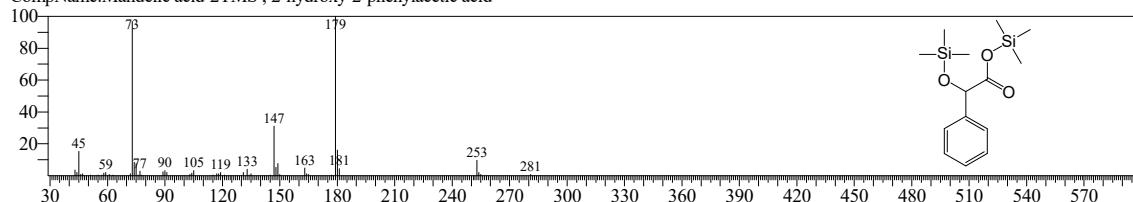

Hit#:5 Entry:10 Library:OA\_TMS\_DB5\_67min\_V3.lib

SI:44 Formula:C10H24O3Si2 CAS:594-61-6 MolWeight:248 RetIndex:1067

CompName:2-Hydroxyisobutyric acid-2TMS ; 2-hydroxy-2-methylpropanoic acid

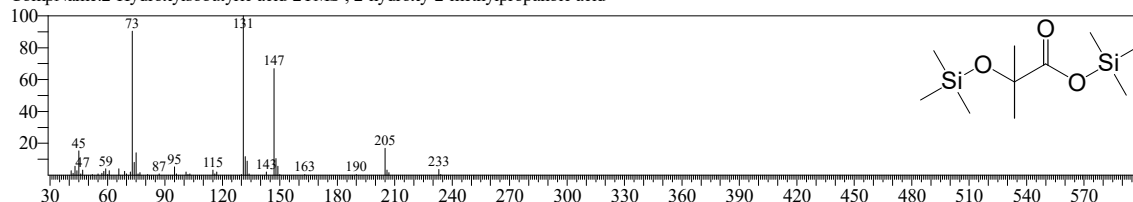

<< Target >>

Line#9 R.Time:27.970(Scan#:4695) MassPeaks:305

RawMode:Averaged 27.965-27.975(4694-4696) BasePeak:44.00(1030)

BG Mode:Calc. from Peak Group 1 - Event 1 Q3 Scan

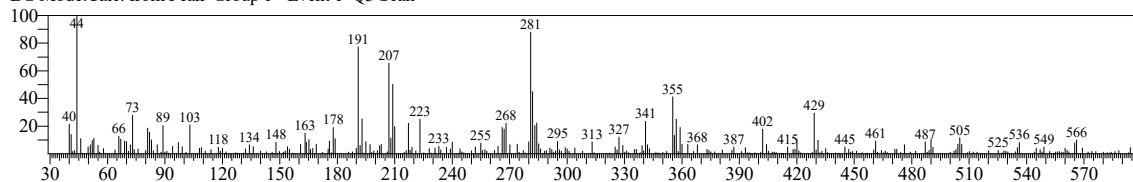

Hit#1 Entry:402 Library:OA\_TMS\_DB5\_67min\_V3.lib

SI:40 Formula:C20H42O4Si4 CAS:775-01-9 MolWeight:458 RetIndex:1942

CompName:3,4-Dihydroxymandelic acid-4TMS ; 2-(3,4-dihydroxyphenyl)-2-hydroxyacetic acid



Hit#2 Entry:211 Library:OA\_TMS\_DB5\_67min\_V3.lib

SI:39 Formula:C13H22O3Si2 CAS:99-96-7 MolWeight:282 RetIndex:1636

CompName:4-Hydroxybenzoic acid-2TMS ; 4-hydroxybenzoic acid

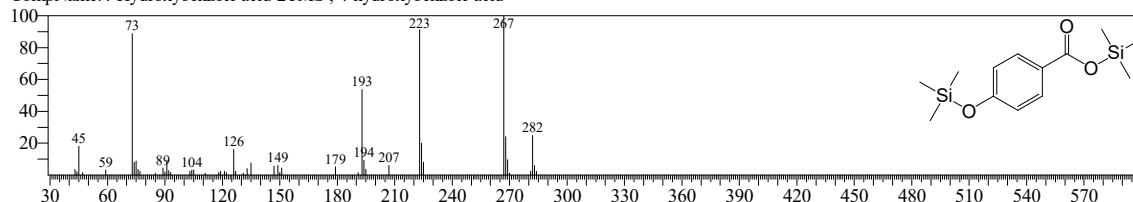

Hit#3 Entry:343 Library:OA\_TMS\_DB5\_67min\_V3.lib

SI:37 Formula:C18H37NO3Si3 CAS:51-43-4 MolWeight:399 RetIndex:1868

CompName:Epinephrine-3TMS ; 4-[(1R)-1-hydroxy-2-(methylamino)ethyl]benzene-1,2-diol

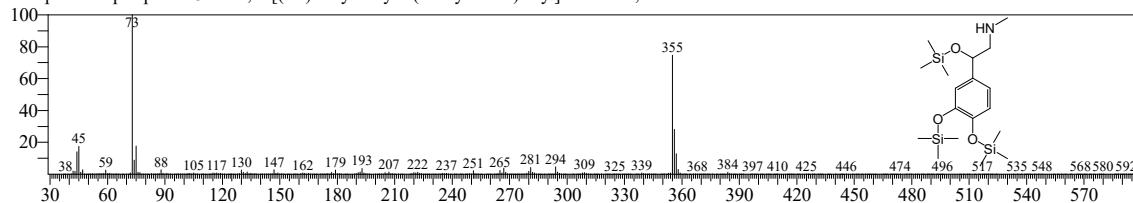

Hit#4 Entry:179 Library:OA\_TMS\_DB5\_67min\_V3.lib

SI:35 Formula:C13H22O3Si2 CAS:99-06-9 MolWeight:282 RetIndex:1572

CompName:3-Hydroxybenzoic acid-2TMS ; 3-hydroxybenzoic acid

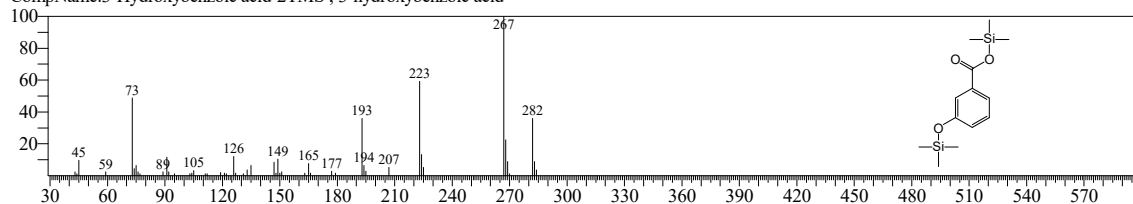

Hit#5 Entry:315 Library:OA\_TMS\_DB5\_67min\_V3.lib

SI:35 Formula:C16H30O4Si3 CAS:99-50-3 MolWeight:370 RetIndex:1833

CompName:Protocatechuic acid-3TMS ; 3,4-dihydroxybenzoic acid

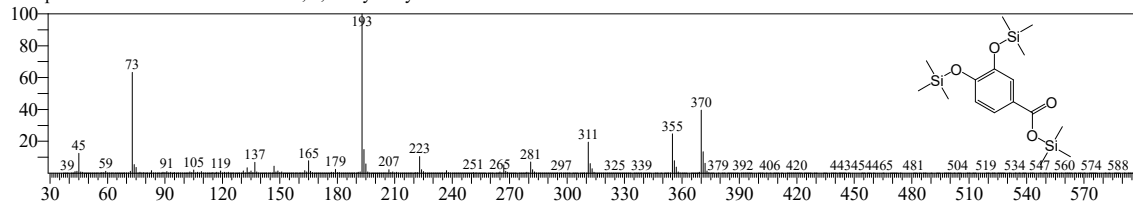

# TNAU

<< Target >>

Line#:10 R.Time:28.455(Scan#:4792) MassPeaks:279

RawMode:Averaged 28.450-28.460(4791-4793) BasePeak:281.00(894)

BG Mode:Calc. from Peak Group 1 - Event 1 Q3 Scan

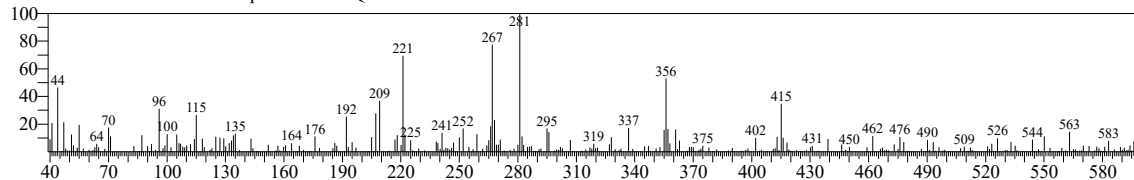

Hit#:1 Entry:341 Library:OA\_TMS\_DB5\_67min\_V3.lib

SI:28 Formula:C18H34O4Si3 CAS:3247-75-4 MolWeight:398 RetIndex:1864

CompName:3-(3-Hydroxyphenyl)-3-hydroxypropionic acid-3TMS ; 3-hydroxy-3-(3-hydroxyphenyl)propanoic acid

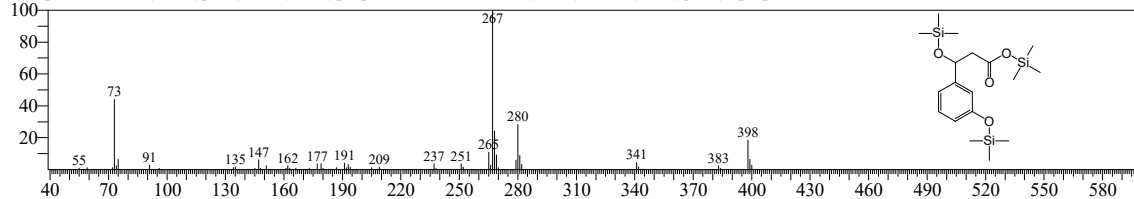

Hit#:2 Entry:402 Library:OA\_TMS\_DB5\_67min\_V3.lib

SI:28 Formula:C20H42O4Si4 CAS:775-01-9 MolWeight:458 RetIndex:1942

CompName:3,4-Dihydroxymandelic acid-4TMS ; 2-(3,4-dihydroxyphenyl)-2-hydroxyacetic acid

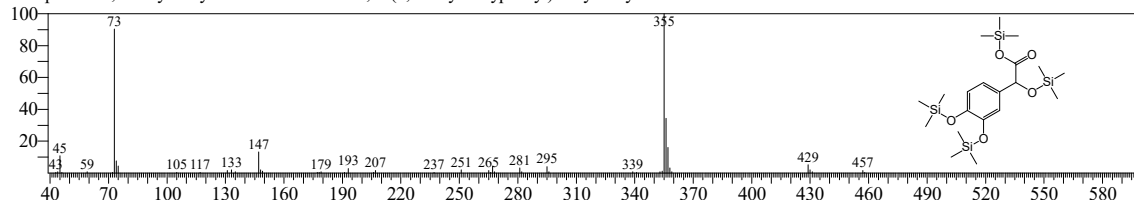

Hit#:3 Entry:203 Library:OA\_TMS\_DB5\_67min\_V3.lib

SI:27 Formula:C13H23NO2Si2 CAS:118-92-3 MolWeight:281 RetIndex:1623

CompName:Anthranilic acid-2TMS ; 2-aminobenzoic acid

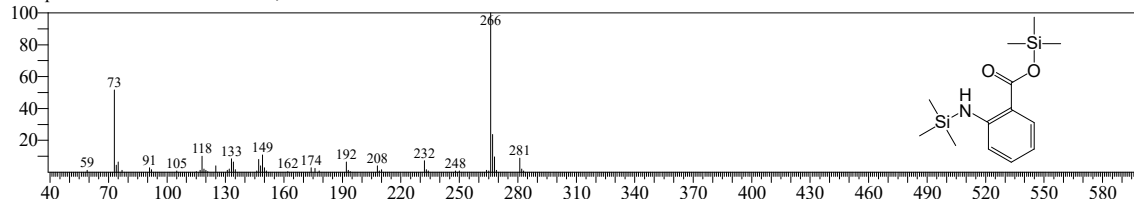

Hit#:4 Entry:413 Library:OA\_TMS\_DB5\_67min\_V3.lib

SI:25 Formula:C18H35NO3Si3 CAS:60-18-4 MolWeight:397 RetIndex:1958

CompName:Tyrosine-3TMS ; (2S)-2-amino-3-(4-hydroxyphenyl)propanoic acid

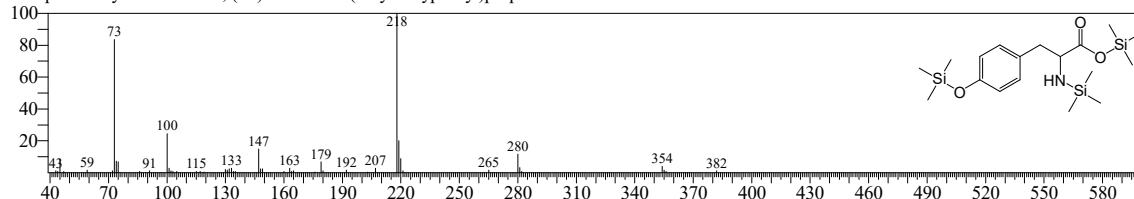

Hit#:5 Entry:211 Library:OA\_TMS\_DB5\_67min\_V3.lib

SI:24 Formula:C13H22O3Si2 CAS:99-96-7 MolWeight:282 RetIndex:1636

CompName:4-Hydroxybenzoic acid-2TMS ; 4-hydroxybenzoic acid

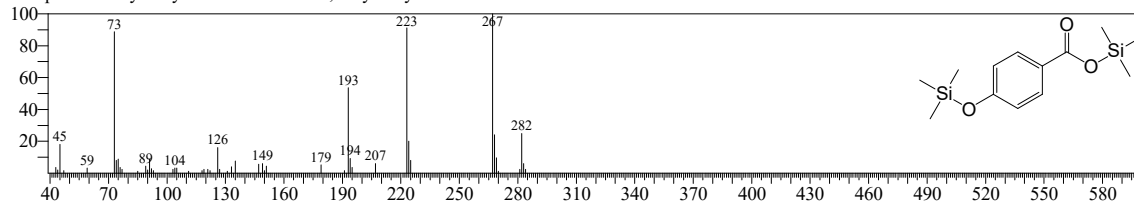

# TNAU

<< Target >>

Line#:11 R.Time:28.515(Scan#:4804) MassPeaks:320

RawMode:Averaged 28.510-28.520(4803-4805) BasePeak:73.05(428)

BG Mode:Calc. from Peak Group 1 - Event 1 Q3 Scan

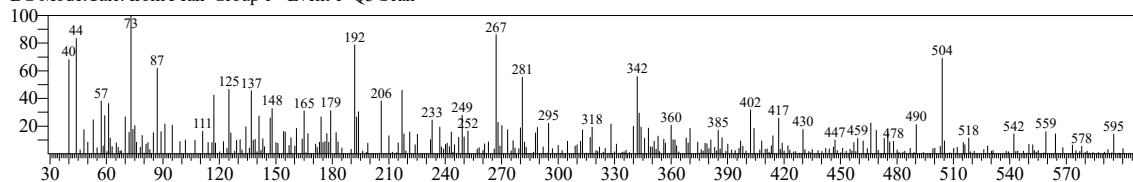

Hit#:1 Entry:341 Library:OA\_TMS\_DB5\_67min\_V3.lib

SI:32 Formula:C18H34O4Si3 CAS:3247-75-4 MolWeight:398 RetIndex:1864

CompName:3-(3-Hydroxyphenyl)-3-hydroxypropionic acid-3TMS ; 3-hydroxy-3-(3-hydroxyphenyl)propanoic acid

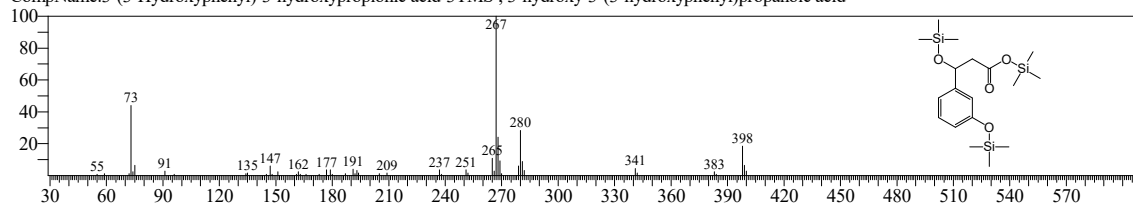

Hit#:2 Entry:438 Library:OA\_TMS\_DB5\_67min\_V3.lib

SI:32 Formula:C12H22N2O2Si2 CAS:104-98-3 MolWeight:282 RetIndex:2014

CompName:Urocanic acid-2TMS ; (E)-3-(1H-imidazol-5-yl)prop-2-enoic acid

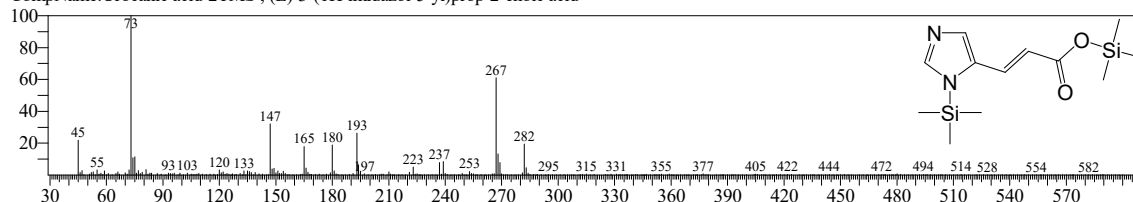

Hit#:3 Entry:328 Library:OA\_TMS\_DB5\_67min\_V3.lib

SI:31 Formula:C13H23NO2Si2 CAS:150-13-0 MolWeight:281 RetIndex:1845

CompName:4-Aminobenzoic acid-2TMS ; 4-aminobenzoic acid



Hit#:4 Entry:194 Library:OA\_TMS\_DB5\_67min\_V3.lib

SI:31 Formula:C15H26O3Si2 CAS:828-01-3 MolWeight:310 RetIndex:1599

CompName:3-Phenyllactic acid-2TMS ; 2-hydroxy-3-phenylpropanoic acid

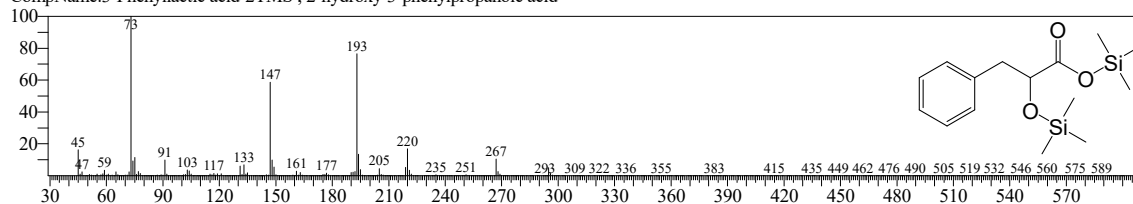

Hit#:5 Entry:384 Library:OA\_TMS\_DB5\_67min\_V3.lib

SI:31 Formula:C17H35NO3Si3 CAS:65-23-6 MolWeight:385 RetIndex:1919

CompName:Pyridoxine-3TMS ; 4,5-bis(hydroxymethyl)-2-methylpyridin-3-ol

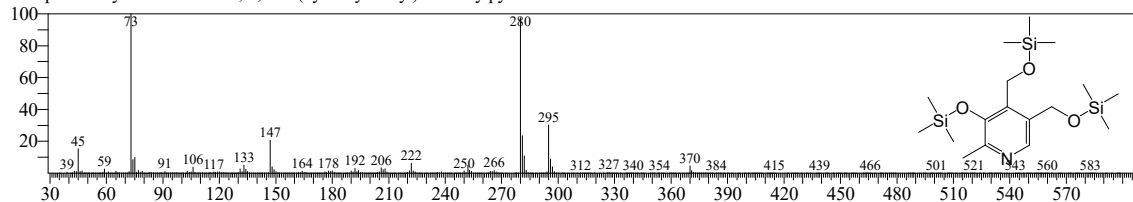

<< Target >>

Line#:12 R.Time:28.625(Scan#:4826) MassPeaks:315

RawMode:Averaged 28.620-28.630(4825-4827) BasePeak:281.05(2242)

BG Mode:Calc. from Peak Group 1 - Event 1 Q3 Scan

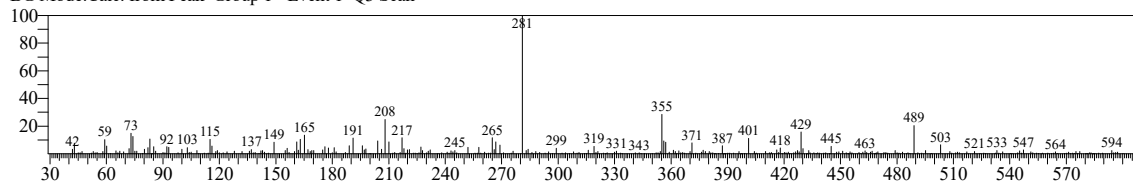

Hit#:1 Entry:402 Library:OA\_TMS\_DB5\_67min\_V3.lib

SI:41 Formula:C20H42O4Si4 CAS:775-01-9 MolWeight:458 RetIndex:1942

CompName:3,4-Dihydroxymandelic acid-4TMS ; 2-(3,4-dihydroxyphenyl)-2-hydroxyacetic acid



Hit#:2 Entry:343 Library:OA\_TMS\_DB5\_67min\_V3.lib

SI:38 Formula:C18H37NO3Si3 CAS:51-43-4 MolWeight:399 RetIndex:1868

CompName:Epinephrine-3TMS ; 4-[(1R)-1-hydroxy-2-(methylamino)ethyl]benzene-1,2-diol

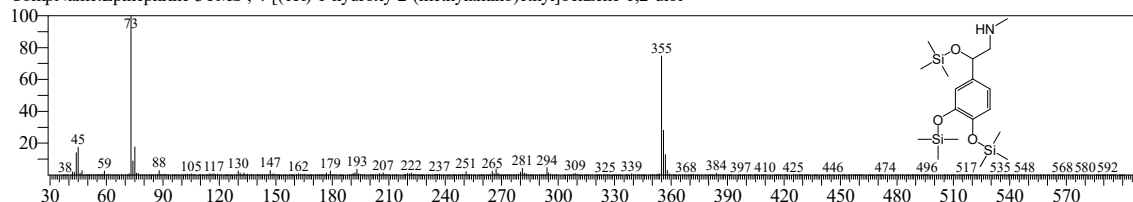

Hit#:3 Entry:507 Library:OA\_TMS\_DB5\_67min\_V3.lib

SI:35 Formula:C25H64NO9PSi6 CAS:3672-15-9 MolWeight:721 RetIndex:2377

CompName:Mannose 6-phosphate-meto-6TMS(2) ; [(2R,3S,4S,5S)-3,4,5,6-tetrahydroxyoxan-2-yl]methyl dihydrogen phosphate

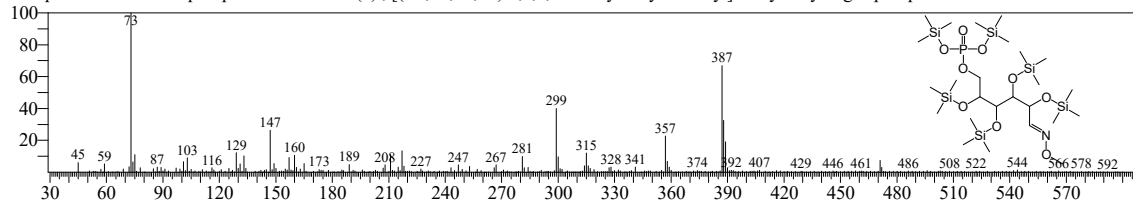

Hit#:4 Entry:528 Library:OA\_TMS\_DB5\_67min\_V3.lib

SI:33 Formula:C17H28Cl2N2O5Si2 CAS:56-75-7 MolWeight:466 RetIndex:2508

CompName:Chloramphenicol-2TMS ; 2,2-dichloro-N-[(1R,2R)-1,3-dihydroxy-1-(4-nitrophenyl)propan-2-yl]acetamide

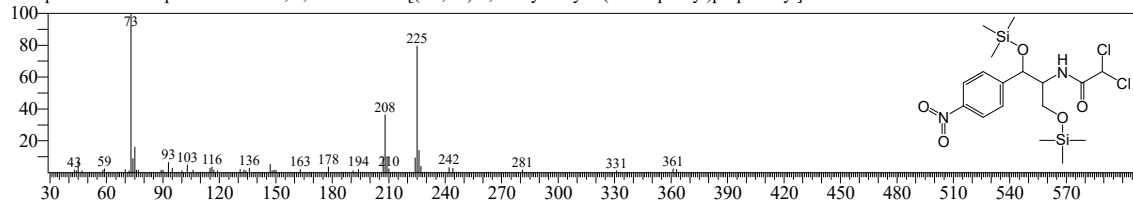

Hit#:5 Entry:413 Library:OA\_TMS\_DB5\_67min\_V3.lib

SI:32 Formula:C18H35NO3Si3 CAS:60-18-4 MolWeight:397 RetIndex:1958

CompName:Tyrosine-3TMS ; (2S)-2-amino-3-(4-hydroxyphenyl)propanoic acid

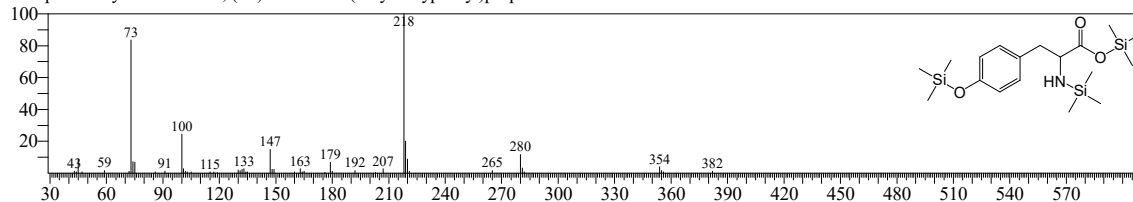

# TNAU

<< Target >>

Line#:13 R.Time:28.905(Scan#:4882) MassPeaks:285

RawMode:Averaged 28.900-28.910(4881-4883) BasePeak:207.05(1582)

BG Mode:Calc. from Peak Group 1 - Event 1 Q3 Scan

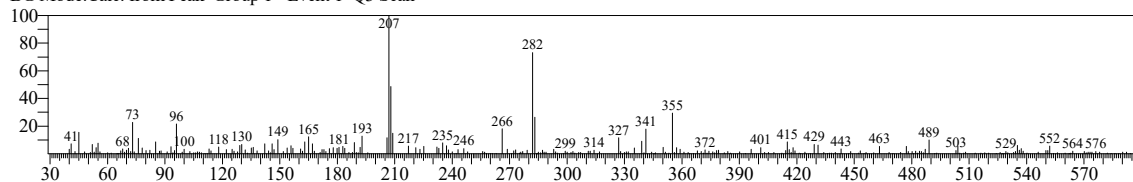

Hit#:1 Entry:290 Library:OA TMS DB5\_67min\_V3.lib

SI:37 Formula:C13H23NO3Si2 CAS:548-93-6 MolWeight:297 RetIndex:1773

CompName:3-Hydroxyanthranilic acid-2TMS ; 2-amino-3-hydroxybenzoic acid

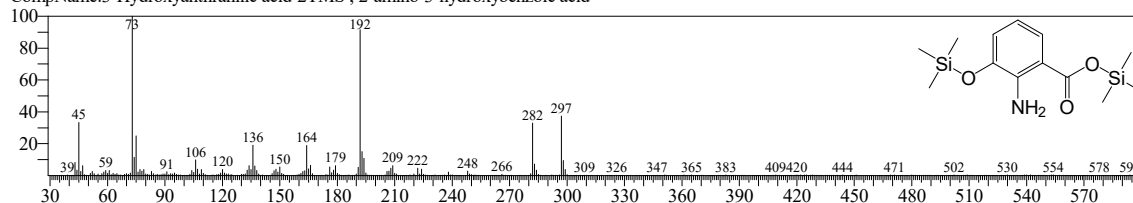

Hit#:2 Entry:402 Library:OA TMS DB5\_67min\_V3.lib

SI:36 Formula:C20H42O4Si4 CAS:775-01-9 MolWeight:458 RetIndex:1942

CompName:3,4-Dihydroxymandelic acid-4TMS ; 2-(3,4-dihydroxyphenyl)-2-hydroxyacetic acid

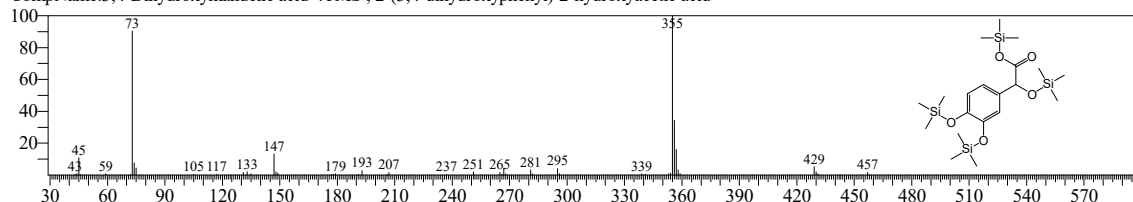

Hit#:3 Entry:328 Library:OA TMS DB5\_67min\_V3.lib

SI:35 Formula:C13H23NO2Si2 CAS:150-13-0 MolWeight:281 RetIndex:1845

CompName:4-Aminobenzoic acid-2TMS ; 4-aminobenzoic acid

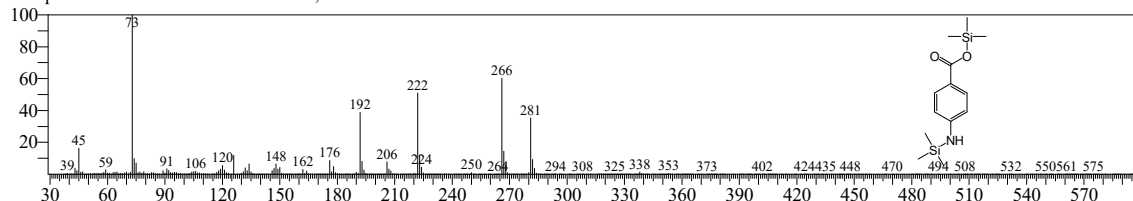

Hit#:4 Entry:528 Library:OA TMS DB5\_67min\_V3.lib

SI:34 Formula:C17H28Cl2N2O5Si2 CAS:56-75-7 MolWeight:466 RetIndex:2508

CompName:Chloramphenicol-2TMS ; 2,2-dichloro-N-[(1R,2R)-1,3-dihydroxy-1-(4-nitrophenyl)propan-2-yl]acetamide

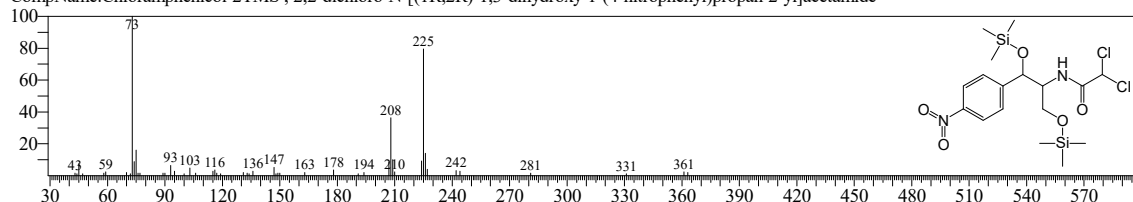

Hit#:5 Entry:343 Library:OA TMS DB5\_67min\_V3.lib

SI:33 Formula:C18H37NO3Si3 CAS:51-43-4 MolWeight:399 RetIndex:1868

CompName:Epinephrine-3TMS ; 4-[(1R)-1-hydroxy-2-(methylamino)ethyl]benzene-1,2-diol

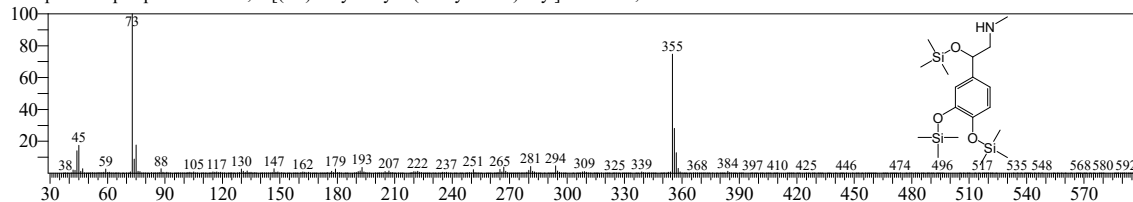

# TNAU

<< Target >>

Line#:14 R.Time:29.010(Scan#:4903) MassPeaks:295

RawMode:Averaged 29.005-29.015(4902-4904) BasePeak:207.05(1681)

BG Mode:Calc. from Peak Group 1 - Event 1 Q3 Scan

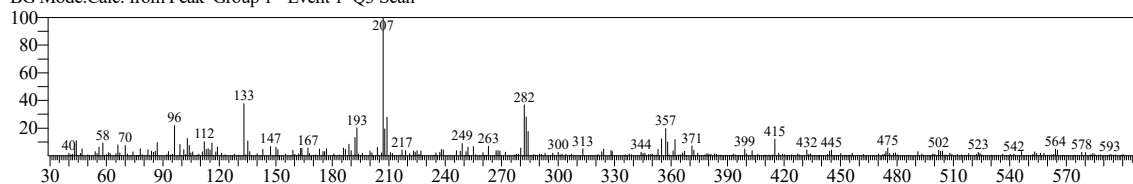

Hit#:1 Entry:308 Library:OA\_TMS\_DB5\_67min\_V3.lib

SI:31 Formula:C<sub>19</sub>H<sub>42</sub>O<sub>5</sub>Si<sub>4</sub> CAS:138-59-0 MolWeight:462 RetIndex:1819

CompName:Shikimic acid-4TMS ; 3,4,5-trihydroxycyclohexene-1-carboxylic acid

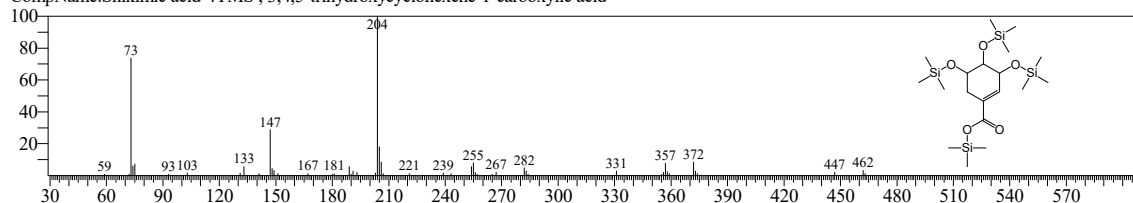

Hit#:2 Entry:315 Library:OA\_TMS\_DB5\_67min\_V3.lib

SI:29 Formula:C<sub>16</sub>H<sub>30</sub>O<sub>4</sub>Si<sub>3</sub> CAS:99-50-3 MolWeight:370 RetIndex:1833

CompName:Protocatechuic acid-3TMS ; 3,4-dihydroxybenzoic acid

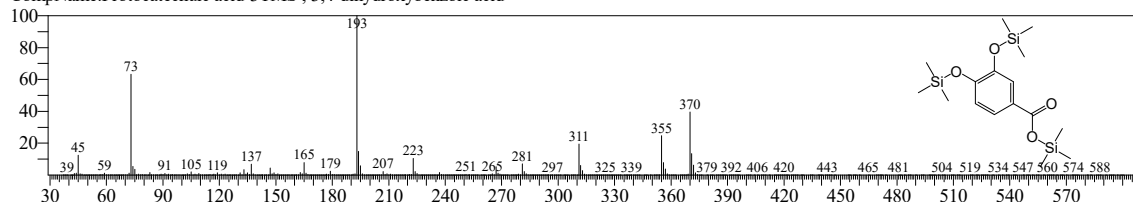

Hit#:3 Entry:431 Library:OA\_TMS\_DB5\_67min\_V3.lib

SI:28 Formula:C<sub>21</sub>H<sub>45</sub>NO<sub>3</sub>Si<sub>4</sub> CAS:51-43-4 MolWeight:471 RetIndex:1989

CompName:Epinephrine-4TMS ; 4-[(1R)-1-hydroxy-2-(methylamino)ethyl]benzene-1,2-diol

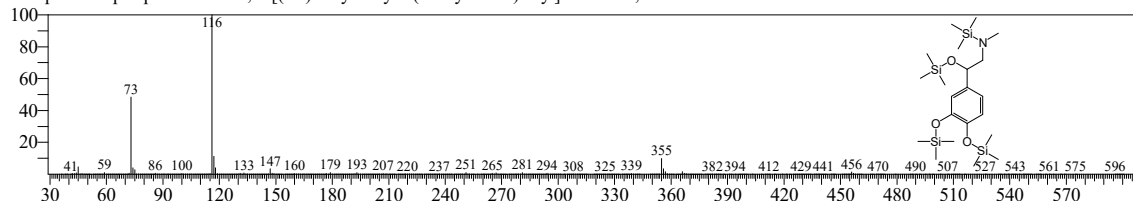

Hit#:4 Entry:402 Library:OA\_TMS\_DB5\_67min\_V3.lib

SI:27 Formula:C<sub>20</sub>H<sub>42</sub>O<sub>4</sub>Si<sub>4</sub> CAS:775-01-9 MolWeight:458 RetIndex:1942

CompName:3,4-Dihydroxymandelic acid-4TMS ; 2-(3,4-dihydroxyphenyl)-2-hydroxyacetic acid

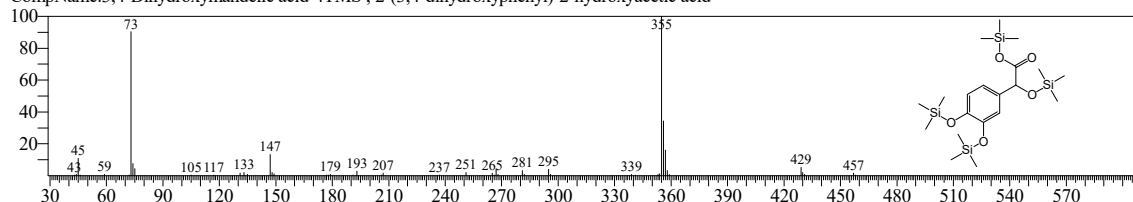

Hit#:5 Entry:452 Library:OA\_TMS\_DB5\_67min\_V3.lib

SI:25 Formula:C<sub>15</sub>H<sub>25</sub>NO<sub>4</sub>Si<sub>2</sub> CAS:487-54-7 MolWeight:339 RetIndex:2086

CompName:2-Hydroxyhippuric acid-2TMS ; 2-[(2-hydroxybenzoyl)amino]acetic acid

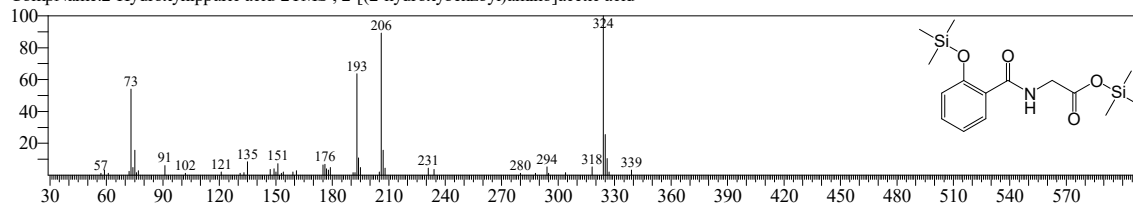



# TNAU

<< Target >>

Line#:15 R.Time:29.150(Scan#:4931) MassPeaks:312

RawMode:Averaged 29.145-29.155(4930-4932) BasePeak:207.05(1376)

BG Mode:Calc. from Peak Group 1 - Event 1 Q3 Scan

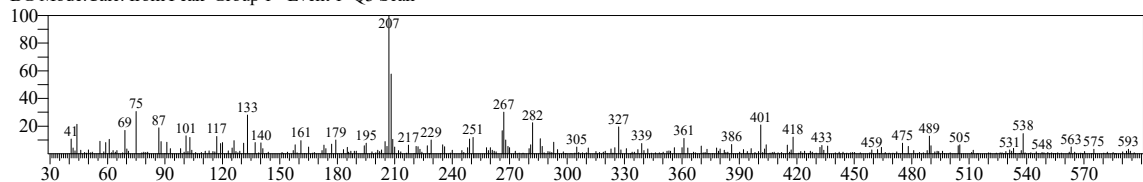

Hit#:1 Entry:179 Library:OA\_TMS\_DB5\_67min\_V3.lib

SI:31 Formula:C13H22O3Si2 CAS:99-06-9 MolWeight:282 RetIndex:1572

CompName:3-Hydroxybenzoic acid-2TMS ; 3-hydroxybenzoic acid

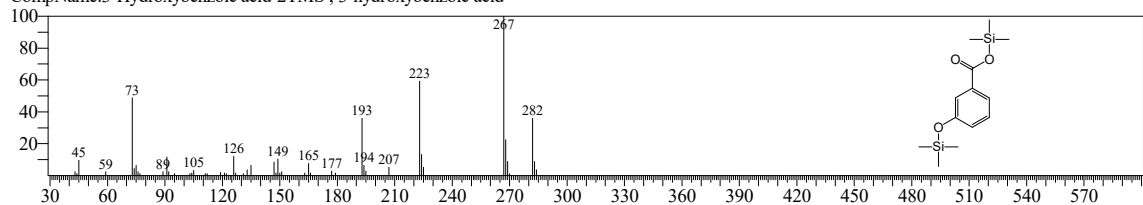

Hit#:2 Entry:211 Library:OA\_TMS\_DB5\_67min\_V3.lib

SI:29 Formula:C13H22O3Si2 CAS:99-96-7 MolWeight:282 RetIndex:1636

CompName:4-Hydroxybenzoic acid-2TMS ; 4-hydroxybenzoic acid

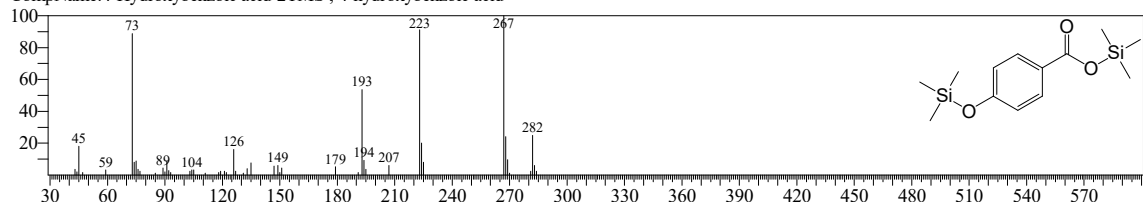

Hit#:3 Entry:203 Library:OA\_TMS\_DB5\_67min\_V3.lib

SI:29 Formula:C13H23NO2Si2 CAS:118-92-3 MolWeight:281 RetIndex:1623

CompName:Anthranilic acid-2TMS ; 2-aminobenzoic acid

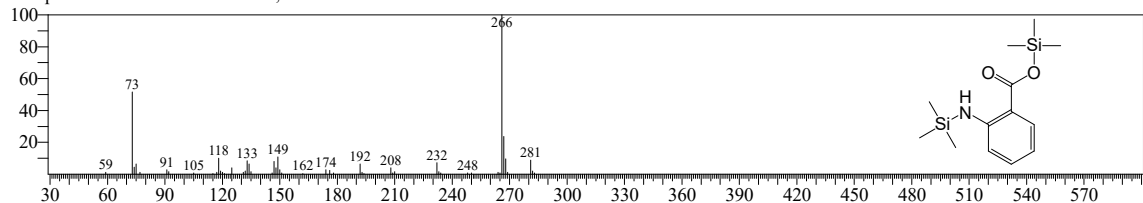

Hit#:4 Entry:539 Library:OA\_TMS\_DB5\_67min\_V3.lib

SI:29 Formula:C27H60O3Si2 CAS:544-62-7 MolWeight:488 RetIndex:2684

CompName:Batyl alcohol-2TMS ; 3-octadecoxypropane-1,2-diol

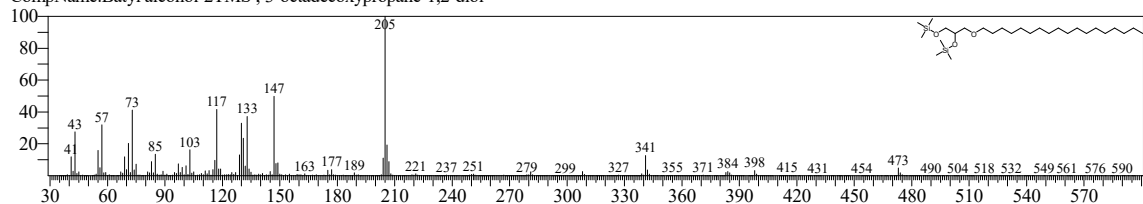

Hit#:5 Entry:171 Library:OA\_TMS\_DB5\_67min\_V3.lib

SI:28 Formula:C12H16O2Si CAS:140-10-3 MolWeight:220 RetIndex:1552

CompName:Cinnamic acid-TMS ; (E)-3-phenylprop-2-enoic acid

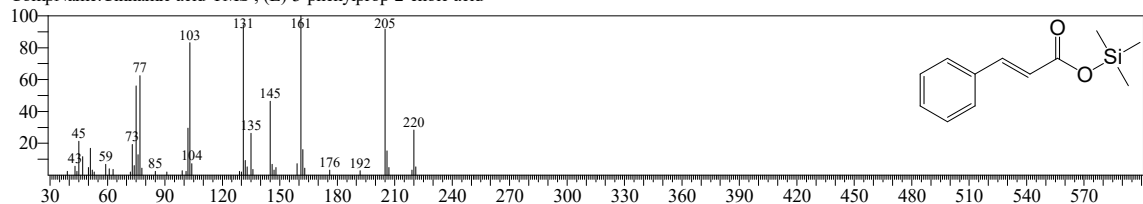

# TNAU

<< Target >>

Line#:16 R.Time:29.570(Scan#:5015) MassPeaks:308

RawMode:Averaged 29.565-29.575(5014-5016) BasePeak:207.05(991)

BG Mode:Calc. from Peak Group 1 - Event 1 Q3 Scan

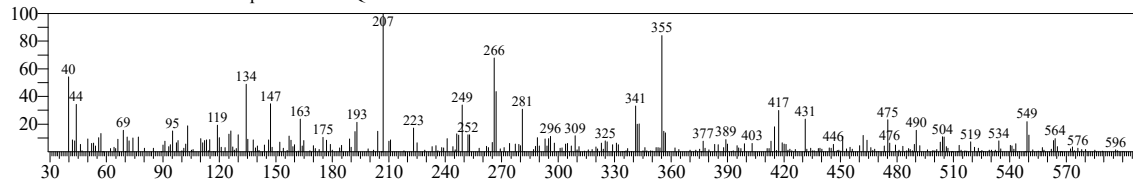

Hit#:1 Entry:402 Library:OA\_TMS\_DB5\_67min\_V3.lib

SI:33 Formula:C20H42O4Si4 CAS:775-01-9 MolWeight:458 RetIndex:1942

CompName:3,4-Dihydroxymandelic acid-4TMS ; 2-(3,4-dihydroxyphenyl)-2-hydroxyacetic acid

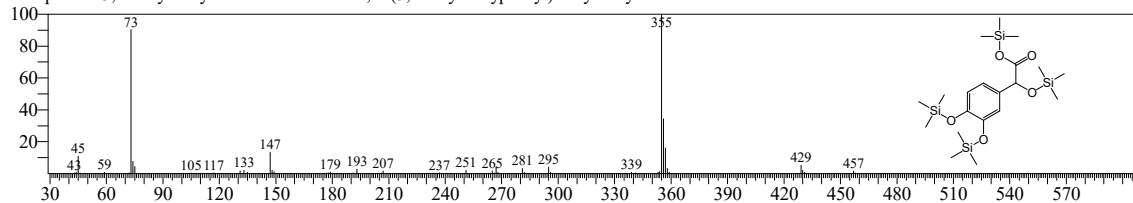

Hit#:2 Entry:315 Library:OA\_TMS\_DB5\_67min\_V3.lib

SI:26 Formula:C16H30O4Si3 CAS:99-50-3 MolWeight:370 RetIndex:1833

CompName:Protocatechuic acid-3TMS ; 3,4-dihydroxybenzoic acid



Hit#:3 Entry:179 Library:OA\_TMS\_DB5\_67min\_V3.lib

SI:25 Formula:C13H22O3Si2 CAS:99-06-9 MolWeight:282 RetIndex:1572

CompName:3-Hydroxybenzoic acid-2TMS ; 3-hydroxybenzoic acid

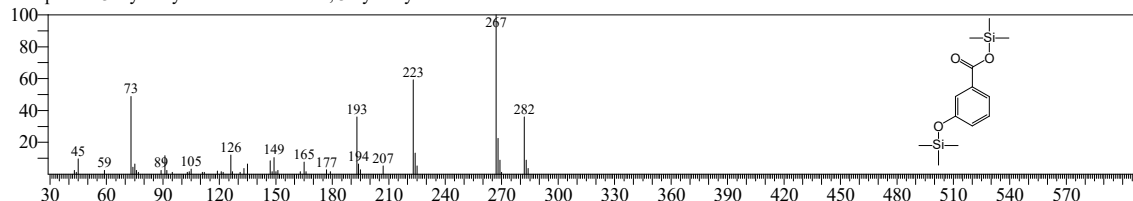

Hit#:4 Entry:211 Library:OA\_TMS\_DB5\_67min\_V3.lib

SI:25 Formula:C13H22O3Si2 CAS:99-96-7 MolWeight:282 RetIndex:1636

CompName:4-Hydroxybenzoic acid-2TMS ; 4-hydroxybenzoic acid

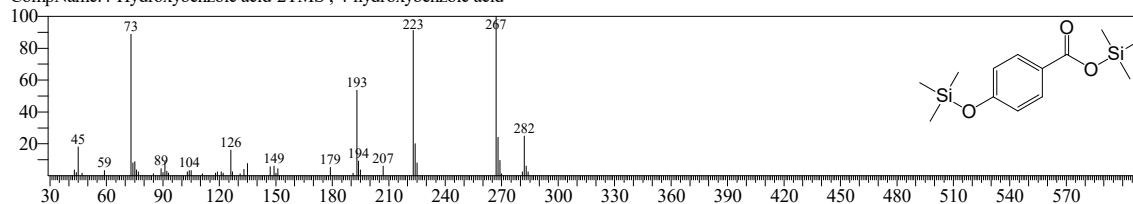

Hit#:5 Entry:203 Library:OA\_TMS\_DB5\_67min\_V3.lib

SI:25 Formula:C13H23NO2Si2 CAS:118-92-3 MolWeight:281 RetIndex:1623

CompName:Anthranilic acid-2TMS ; 2-aminobenzoic acid

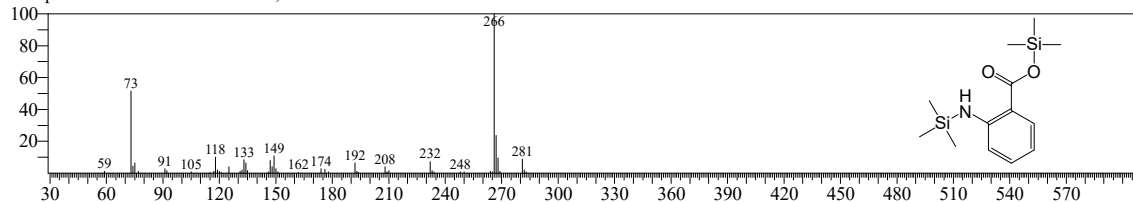

<< Target >>

Line#:17 R.Time:29.895(Scan#:5080) MassPeaks:323

RawMode:Averaged 29.890-29.900(5079-5081) BasePeak:281.10(822)

BG Mode:Calc. from Peak Group 1 - Event 1 Q3 Scan

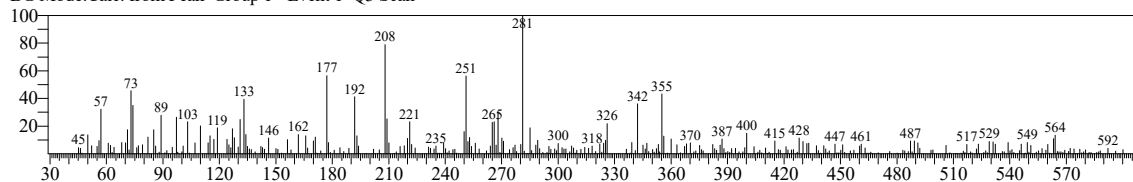

Hit#:1 Entry:328 Library:OA\_TMS\_DB5\_67min\_V3.lib

SI:37 Formula:C13H23NO2Si2 CAS:150-13-0 MolWeight:281 RetIndex:1845

CompName:4-Aminobenzoic acid-2TMS ; 4-aminobenzoic acid

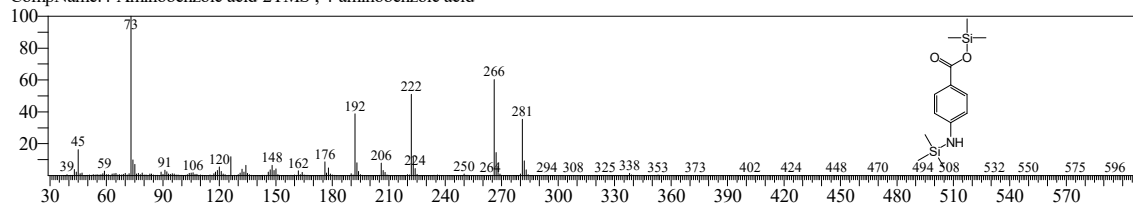

Hit#:2 Entry:339 Library:OA\_TMS\_DB5\_67min\_V3.lib

SI:35 Formula:C13H18O3Si CAS:458-36-6 MolWeight:250 RetIndex:1859

CompName:Coniferyl aldehyde-TMS ; (E)-3-(4-hydroxy-3-methoxyphenyl)prop-2-enal

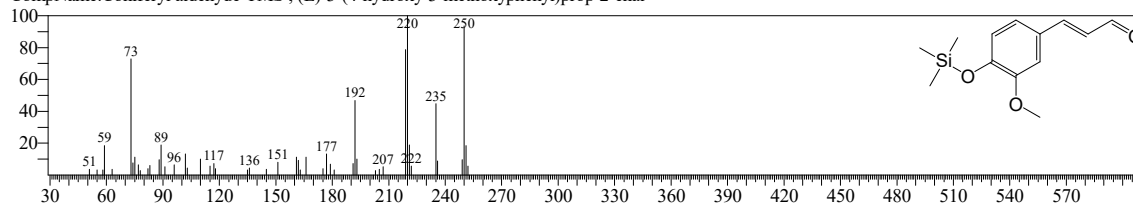

Hit#:3 Entry:343 Library:OA\_TMS\_DB5\_67min\_V3.lib

SI:35 Formula:C18H37NO3Si3 CAS:51-43-4 MolWeight:399 RetIndex:1868

CompName:Epinephrine-3TMS ; 4-[(1R)-1-hydroxy-2-(methylamino)ethyl]benzene-1,2-diol

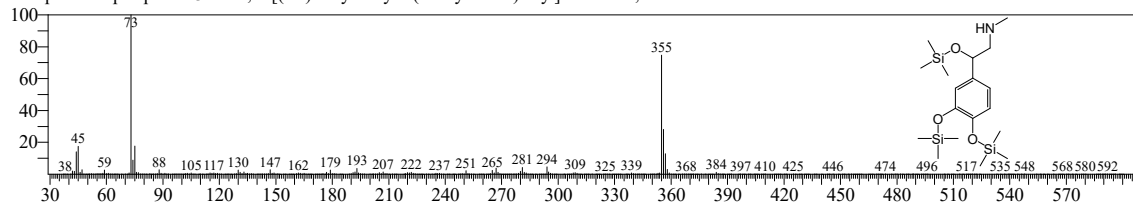

Hit#:4 Entry:203 Library:OA\_TMS\_DB5\_67min\_V3.lib

SI:34 Formula:C13H23NO2Si2 CAS:118-92-3 MolWeight:281 RetIndex:1623

CompName:Anthranilic acid-2TMS ; 2-aminobenzoic acid

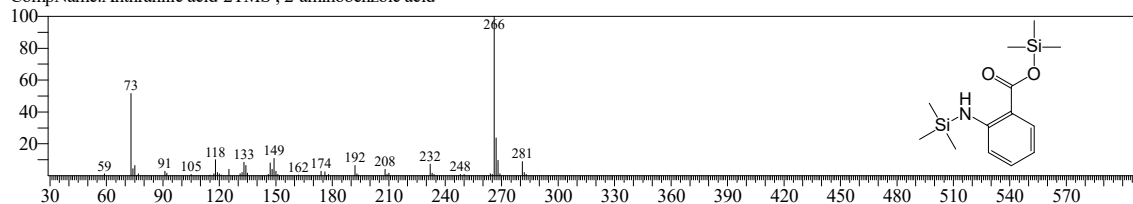

Hit#:5 Entry:402 Library:OA\_TMS\_DB5\_67min\_V3.lib

SI:33 Formula:C20H42O4Si4 CAS:775-01-9 MolWeight:458 RetIndex:1942

CompName:3,4-Dihydroxymandelic acid-4TMS ; 2-(3,4-dihydroxyphenyl)-2-hydroxyacetic acid

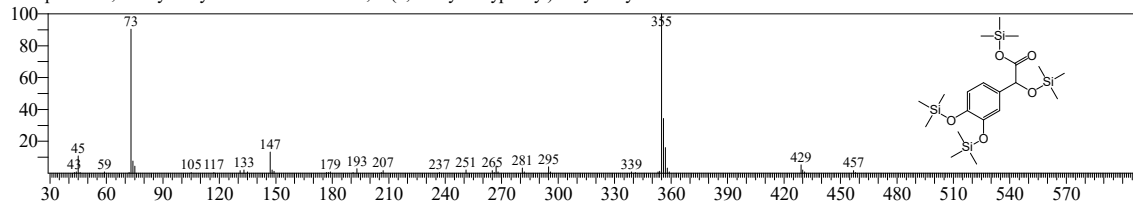

<< Target >>

Line#:18 R.Time:30.370(Scan#:5175) MassPeaks:275

RawMode:Averaged 30.365-30.375(5174-5176) BasePeak:282.05(456)

BG Mode:Calc. from Peak Group 1 - Event 1 Q3 Scan

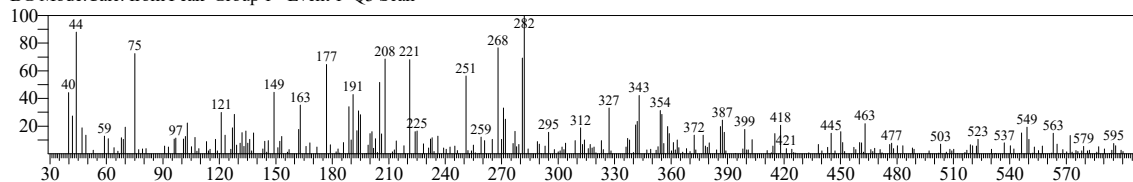

Hit#:1 Entry:315 Library:OA\_TMS\_DB5\_67min\_V3.lib

SI:25 Formula:C16H30O4Si3 CAS:99-50-3 MolWeight:370 RetIndex:1833

CompName:Protocatechuic acid-3TMS ; 3,4-dihydroxybenzoic acid

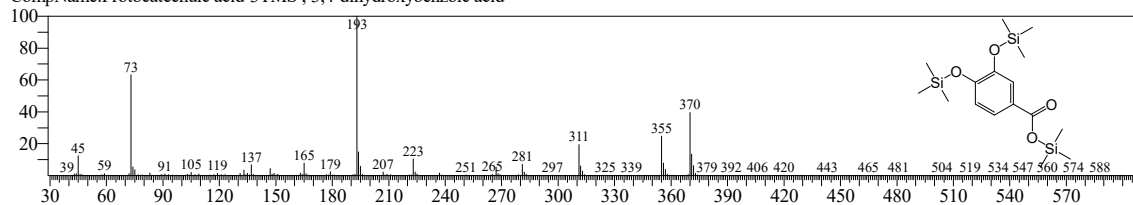

Hit#:2 Entry:402 Library:OA\_TMS\_DB5\_67min\_V3.lib

SI:24 Formula:C20H42O4Si4 CAS:775-01-9 MolWeight:458 RetIndex:1942

CompName:3,4-Dihydroxymandelic acid-4TMS ; 2-(3,4-dihydroxyphenyl)-2-hydroxyacetic acid



Hit#:3 Entry:354 Library:OA\_TMS\_DB5\_67min\_V3.lib

SI:24 Formula:C16H31NO3Si3 CAS:548-93-6 MolWeight:369 RetIndex:1886

CompName:3-Hydroxyanthranilic acid-3TMS ; 2-amino-3-hydroxybenzoic acid

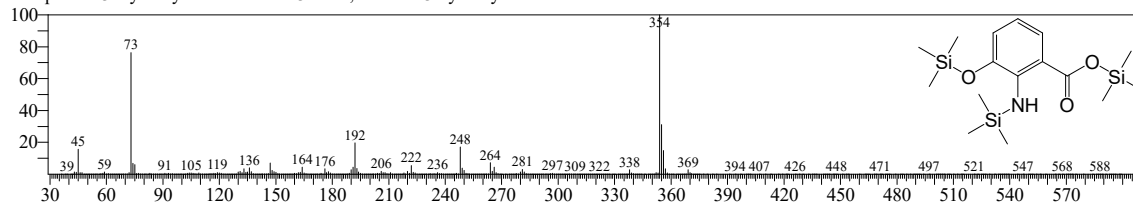

Hit#:4 Entry:150 Library:OA\_TMS\_DB5\_67min\_V3.lib

SI:23 Formula:C15H26O3Si2 CAS:515-30-0 MolWeight:310 RetIndex:1517

CompName:2-Phenyllactic acid-2TMS ; 2-hydroxy-3-phenylpropanoic acid

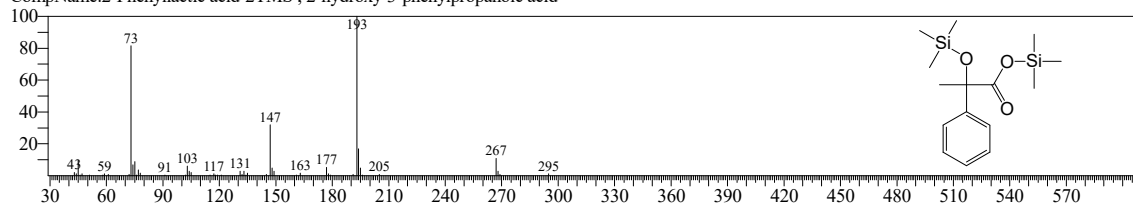

Hit#:5 Entry:329 Library:OA\_TMS\_DB5\_67min\_V3.lib

SI:19 Formula:C11H27NO4SSi2 CAS:820-10-0 MolWeight:325 RetIndex:1848

CompName:Methionine sulfone-2TMS ; 2-amino-4-methylsulfonylbutanoic acid

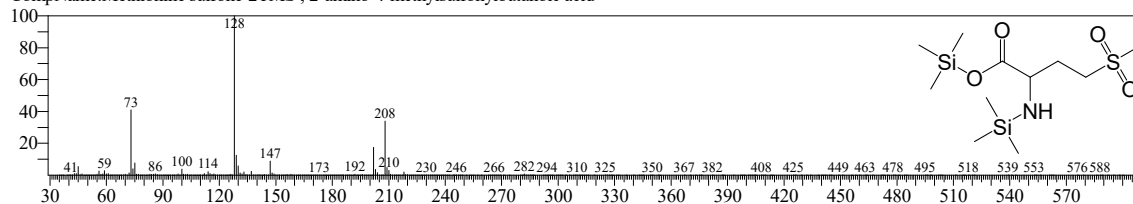

# TNAU

<< Target >>

Line#:19 R.Time:30.460(Scan#:5193) MassPeaks:293

RawMode:Averaged 30.455-30.465(5192-5194) BasePeak:207.00(1917)

BG Mode:Calc. from Peak Group 1 - Event 1 Q3 Scan

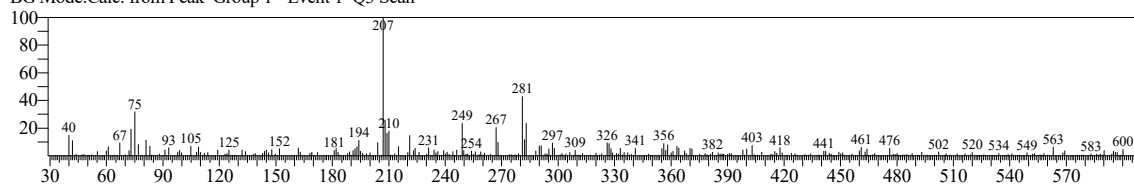

Hit#:1 Entry:294 Library:OA\_TMS\_DB5\_67min\_V3.lib

SI:37 Formula:C15H26O4Si2 CAS:306-08-1 MolWeight:326 RetIndex:1782

CompName:Homovanillic acid-2TMS ; 2-(4-hydroxy-3-methoxyphenyl)acetic acid

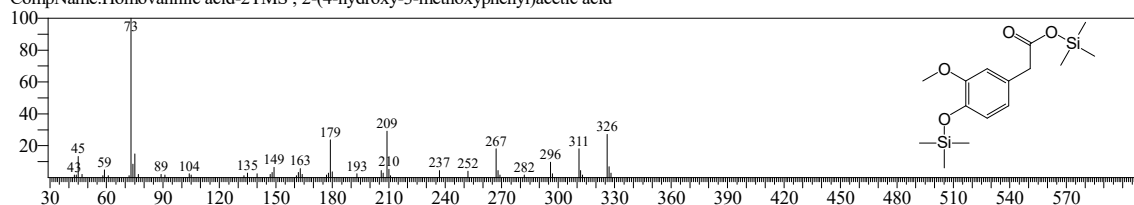

Hit#:2 Entry:315 Library:OA\_TMS\_DB5\_67min\_V3.lib

SI:36 Formula:C16H30O4Si3 CAS:99-50-3 MolWeight:370 RetIndex:1833

CompName:Protocatechuic acid-3TMS ; 3,4-dihydroxybenzoic acid

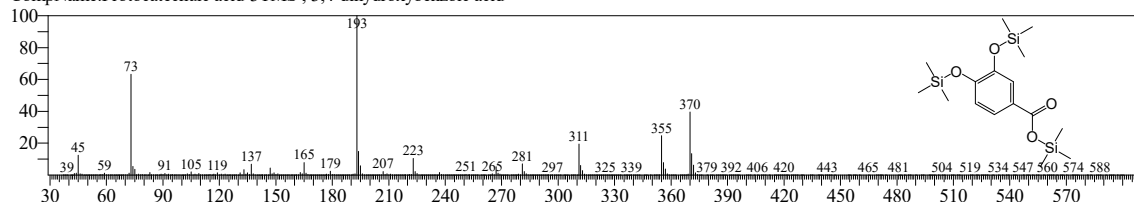

Hit#:3 Entry:211 Library:OA\_TMS\_DB5\_67min\_V3.lib

SI:36 Formula:C13H22O3Si2 CAS:99-96-7 MolWeight:282 RetIndex:1636

CompName:4-Hydroxybenzoic acid-2TMS ; 4-hydroxybenzoic acid

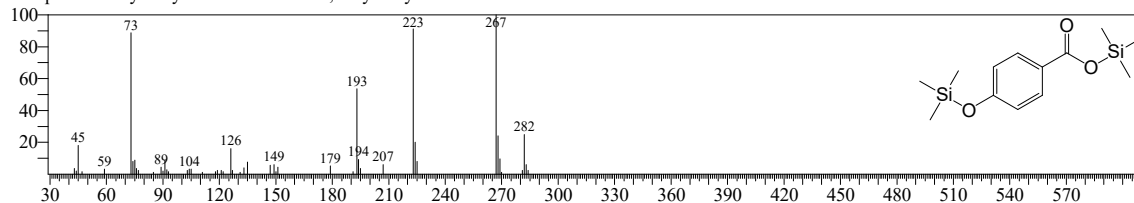

Hit#:4 Entry:343 Library:OA\_TMS\_DB5\_67min\_V3.lib

SI:35 Formula:C18H37NO3Si3 CAS:51-43-4 MolWeight:399 RetIndex:1868

CompName:Epinephrine-3TMS ; 4-[(1R)-1-hydroxy-2-(methylamino)ethyl]benzene-1,2-diol

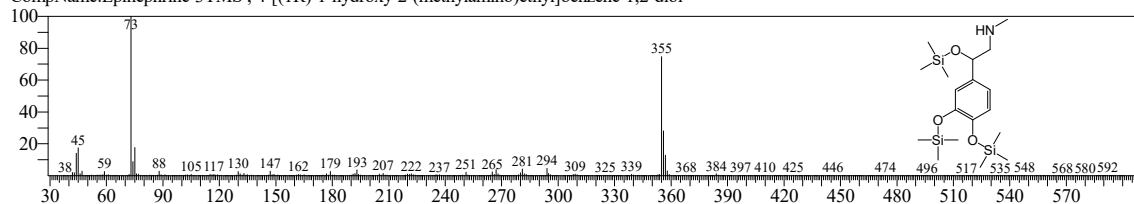

Hit#:5 Entry:328 Library:OA\_TMS\_DB5\_67min\_V3.lib

SI:34 Formula:C13H23NO2Si2 CAS:150-13-0 MolWeight:281 RetIndex:1845

CompName:4-Aminobenzoic acid-2TMS ; 4-aminobenzoic acid

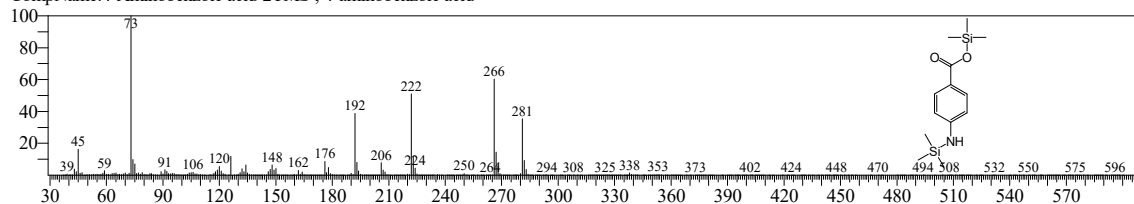

# TNAU

<< Target >>

Line#:20 R.Time:31.445(Scan#:5390) MassPeaks:301

RawMode:Averaged 31.440-31.450(5389-5391) BasePeak:207.00(2262)

BG Mode:Calc. from Peak Group 1 - Event 1 Q3 Scan

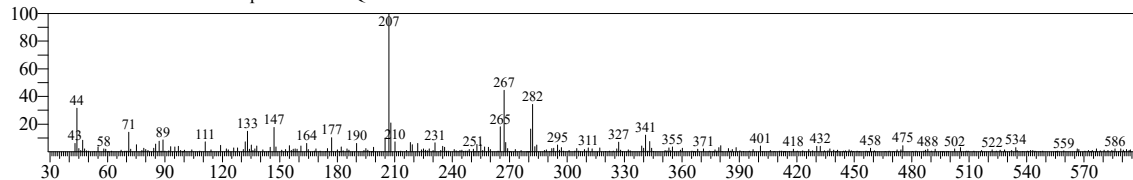

Hit#:1 Entry:179 Library:OA\_TMS\_DB5\_67min\_V3.lib

SI:38 Formula:C13H22O3Si2 CAS:99-06-9 MolWeight:282 RetIndex:1572

CompName:3-Hydroxybenzoic acid-2TMS ; 3-hydroxybenzoic acid

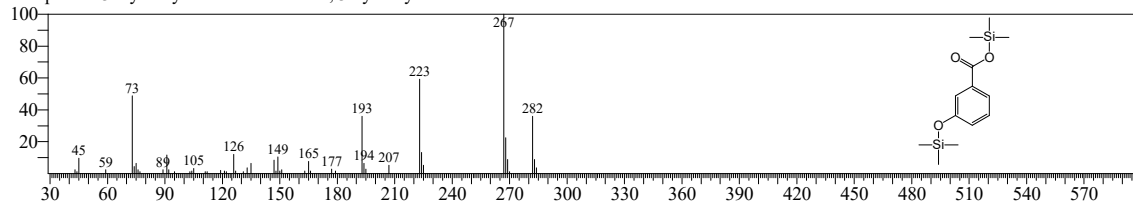

Hit#:2 Entry:211 Library:OA\_TMS\_DB5\_67min\_V3.lib

SI:35 Formula:C13H22O3Si2 CAS:99-96-7 MolWeight:282 RetIndex:1636

CompName:4-Hydroxybenzoic acid-2TMS ; 4-hydroxybenzoic acid



Hit#:3 Entry:539 Library:OA\_TMS\_DB5\_67min\_V3.lib

SI:33 Formula:C27H60O3Si2 CAS:544-62-7 MolWeight:488 RetIndex:2684

CompName:Butyl alcohol-2TMS ; 3-octadecoxypropane-1,2-diol

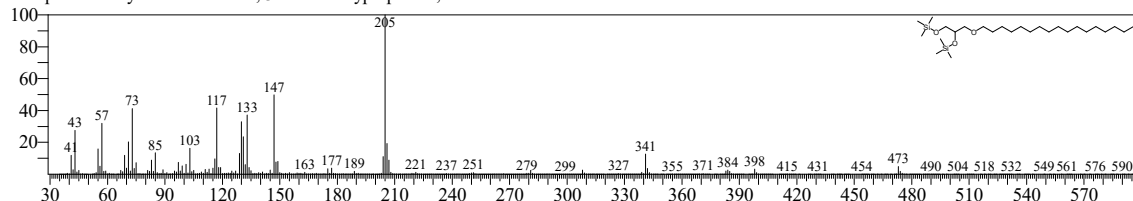

Hit#:4 Entry:310 Library:OA\_TMS\_DB5\_67min\_V3.lib

SI:33 Formula:C11H20N4OSi2 CAS:68-94-0 MolWeight:280 RetIndex:1822

CompName:Hypoxanthine-2TMS ; 3,7-dihydropurin-6-one

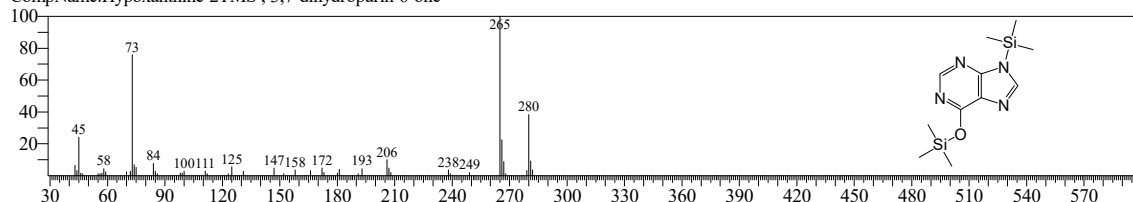

Hit#:5 Entry:341 Library:OA\_TMS\_DB5\_67min\_V3.lib

SI:31 Formula:C18H34O4Si3 CAS:3247-75-4 MolWeight:398 RetIndex:1864

CompName:3-(3-Hydroxyphenyl)-3-hydroxypropionic acid-3TMS ; 3-hydroxy-3-(3-hydroxyphenyl)propanoic acid

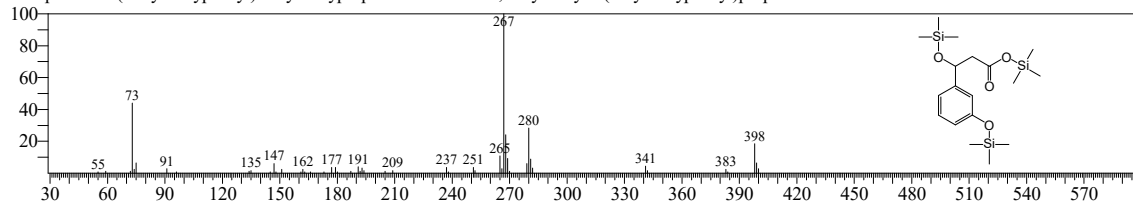

<< Target >>

Line#:21 R.Time:31.755(Scan#:5452) MassPeaks:296

RawMode:Averaged 31.750-31.760(5451-5453) BasePeak:207.05(1869)

BG Mode:Calc. from Peak Group 1 - Event 1 Q3 Scan

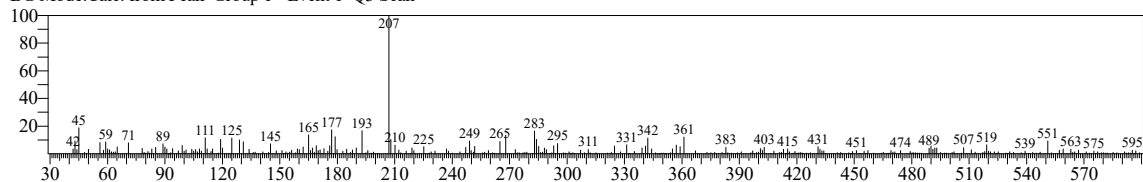

Hit#:1 Entry:310 Library:OA\_TMS\_DB5\_67min\_V3.lib

SI:30 Formula:C<sub>11</sub>H<sub>20</sub>N<sub>4</sub>OSi<sub>2</sub> CAS:68-94-0 MolWeight:280 RetIndex:1822

CompName:Hypoxanthine-2TMS ; 3,7-dihdropurin-6-one

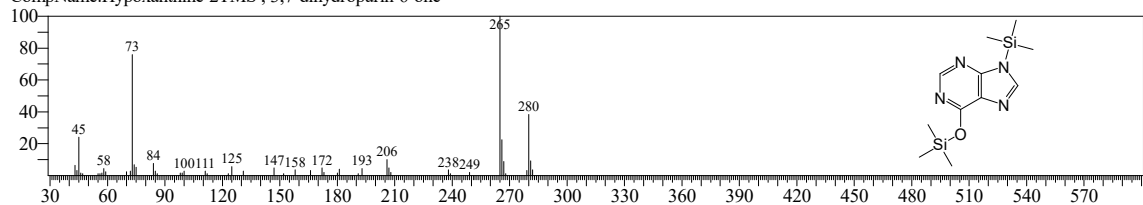

Hit#:2 Entry:474 Library:OA\_TMS\_DB5\_67min\_V3.lib

SI:28 Formula:C<sub>17</sub>H<sub>29</sub>NO<sub>4</sub>Si<sub>2</sub> CAS:537-55-3 MolWeight:367 RetIndex:2148

CompName:N-Acetyltyrosine-2TMS ; (2S)-2-acetamido-3-(4-hydroxyphenyl)propanoic acid

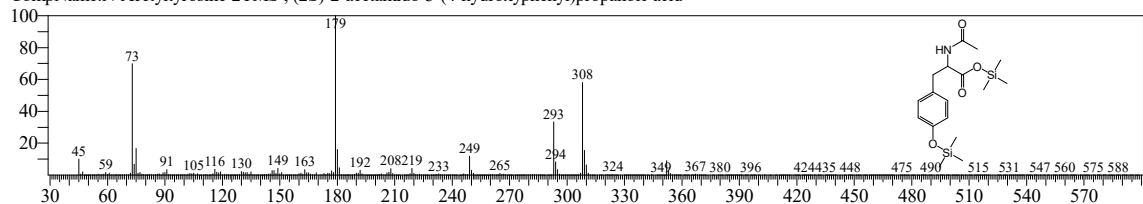

Hit#:3 Entry:382 Library:OA\_TMS\_DB5\_67min\_V3.lib

SI:27 Formula:C<sub>18</sub>H<sub>18</sub>O<sub>4</sub>Si<sub>3</sub> CAS:6482-98-0 MolWeight:398 RetIndex:1918

CompName:4-Hydroxyphenyllactic acid-3TMS ; 2-hydroxy-3-(4-hydroxyphenyl)propanoate

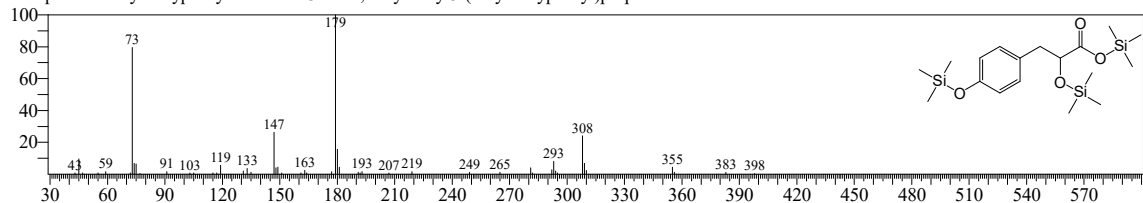

Hit#:4 Entry:394 Library:OA\_TMS\_DB5\_67min\_V3.lib

SI:26 Formula:C<sub>17</sub>H<sub>44</sub>NO<sub>7</sub>PSi<sub>4</sub> CAS:585-18-2 MolWeight:517 RetIndex:1935

CompName:Erythrose 4-phosphate-meto-4TMS(2) ; [(2R,3R)-2,3-dihydroxy-4-oxobutyl] dihydrogen phosphate

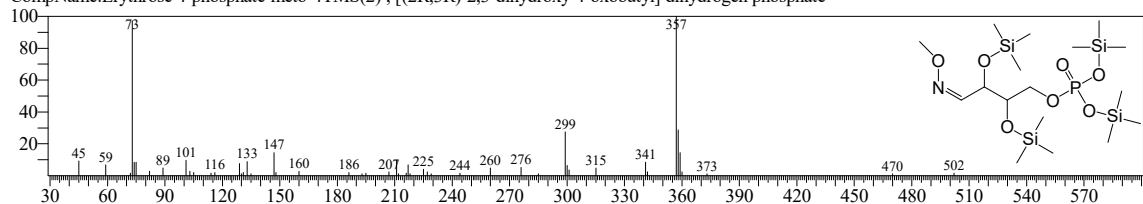

Hit#:5 Entry:315 Library:OA\_TMS\_DB5\_67min\_V3.lib

SI:25 Formula:C<sub>16</sub>H<sub>30</sub>O<sub>4</sub>Si<sub>3</sub> CAS:99-50-3 MolWeight:370 RetIndex:1833

CompName:Protocatechuic acid-3TMS ; 3,4-dihydroxybenzoic acid

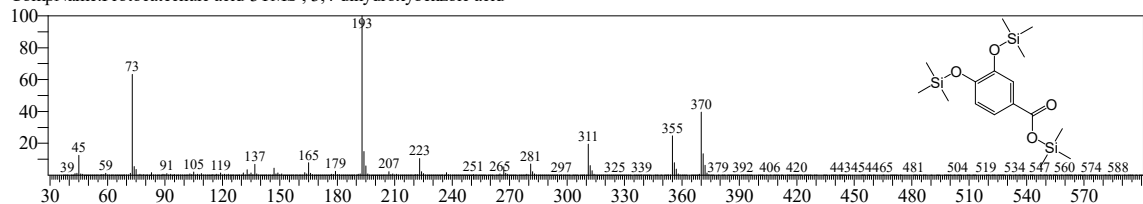

# TNAU

<< Target >>

Line#:22 R.Time:31.910(Scan#:5483) MassPeaks:332

RawMode:Averaged 31.905-31.915(5482-5484) BasePeak:207.05(1294)

BG Mode:Calc. from Peak Group 1 - Event 1 Q3 Scan

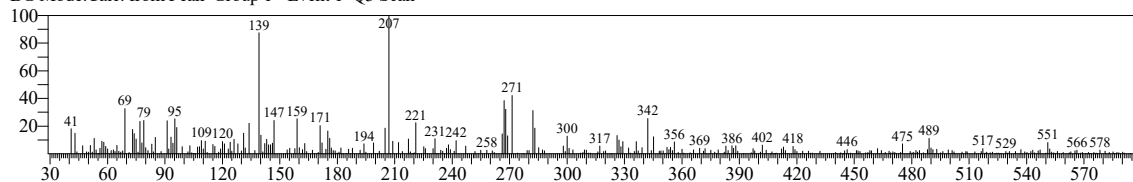

Hit#:1 Entry:179 Library:OA\_TMS\_DB5\_67min\_V3.lib

SI:36 Formula:C13H22O3Si2 CAS:99-06-9 MolWeight:282 RetIndex:1572

CompName:3-Hydroxybenzoic acid-2TMS ; 3-hydroxybenzoic acid

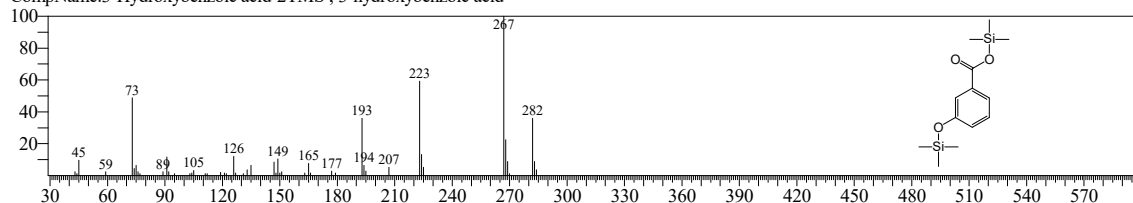

Hit#:2 Entry:534 Library:OA\_TMS\_DB5\_67min\_V3.lib

SI:35 Formula:C25H42O2Si CAS:24880-45-3 MolWeight:402 RetIndex:2591

CompName:Docosapentaenoic acid-TMS ; (7Z,10Z,13Z,16Z,19Z)-docosa-7,10,13,16,19-pentaenoic acid

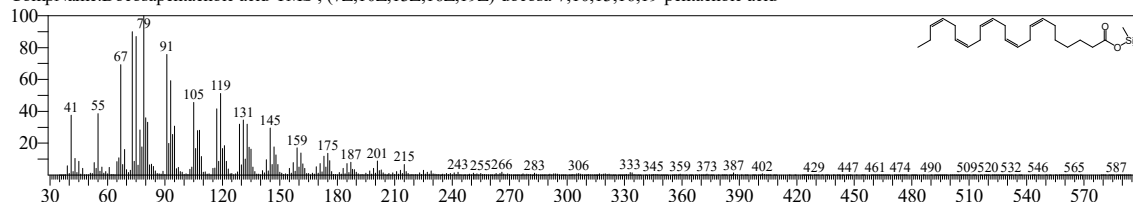

Hit#:3 Entry:211 Library:OA\_TMS\_DB5\_67min\_V3.lib

SI:34 Formula:C13H22O3Si2 CAS:99-96-7 MolWeight:282 RetIndex:1636

CompName:4-Hydroxybenzoic acid-2TMS ; 4-hydroxybenzoic acid

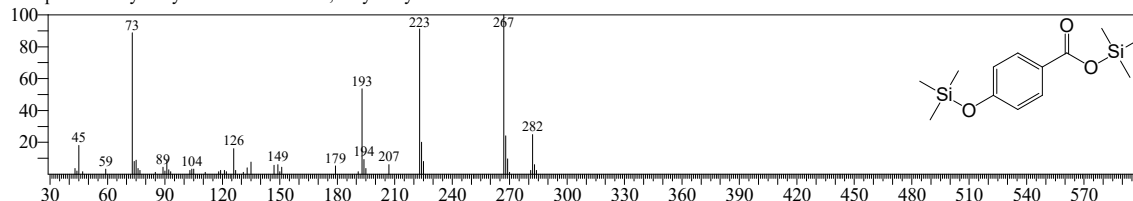

Hit#:4 Entry:508 Library:OA\_TMS\_DB5\_67min\_V3.lib

SI:34 Formula:C23H40O2Si CAS:506-32-1 MolWeight:376 RetIndex:2381

CompName:Arachidonic acid-TMS ; (5Z,8Z,11Z,14Z)-icosa-5,8,11,14-tetraenoic acid

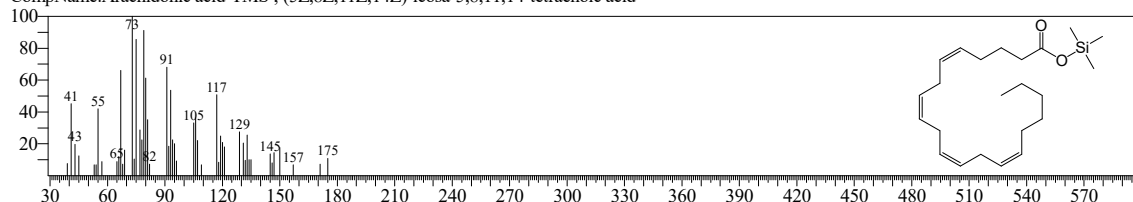

Hit#:5 Entry:509 Library:OA\_TMS\_DB5\_67min\_V3.lib

SI:33 Formula:C23H38O2Si CAS:10417-94-4 MolWeight:374 RetIndex:2389

CompName:Eicosapentaenoic acid-TMS ; icoso-5,8,11,14,17-pentaenoic acid

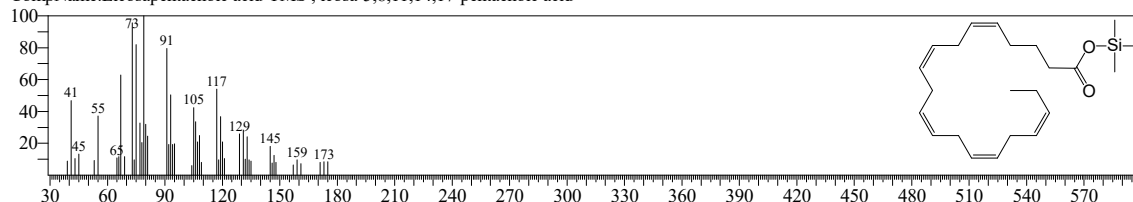



# TNAU

<< Target >>

Line#:23 R.Time:32.085(Scan#:5518) MassPeaks:282

RawMode:Averaged 32.080-32.090(5517-5519) BasePeak:207.05(3070)

BG Mode:Calc. from Peak Group 1 - Event 1 Q3 Scan

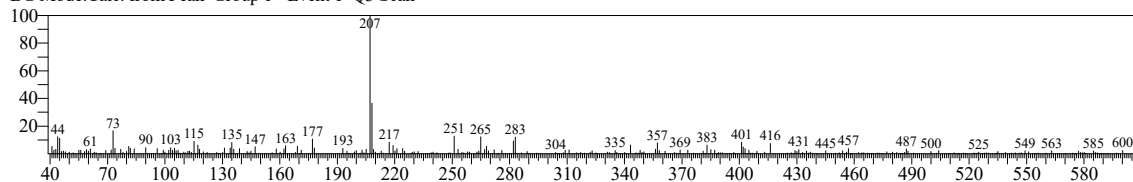

Hit#:1 Entry:77 Library:OA\_TMS\_DB5\_67min\_V3.lib

SI:42 Formula:C12H32O3Si3 CAS:56-81-5 MolWeight:308 RetIndex:1279

CompName:Glycerol-3TMS ; propane-1,2,3-triol

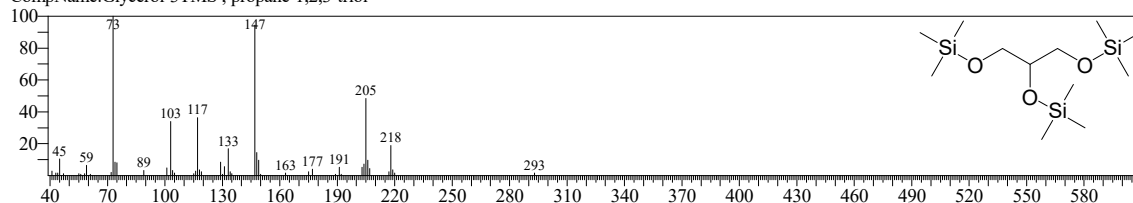

Hit#:2 Entry:13 Library:OA\_TMS\_DB5\_67min\_V3.lib

SI:41 Formula:C8H20O3Si2 CAS:79-14-1 MolWeight:220 RetIndex:1074

CompName:Glycolic acid-2TMS ; 2-hydroxyacetic acid

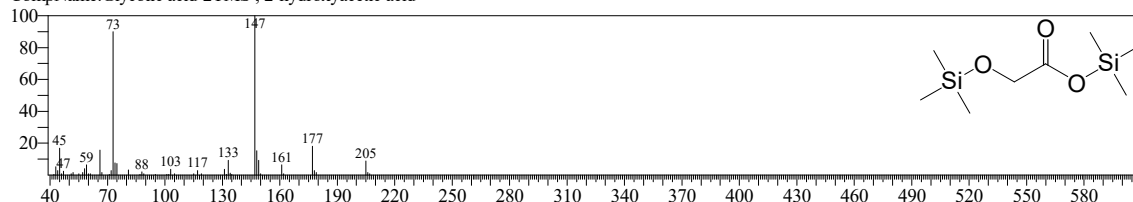

Hit#:3 Entry:528 Library:OA\_TMS\_DB5\_67min\_V3.lib

SI:40 Formula:C17H28Cl2N2O5Si2 CAS:56-75-7 MolWeight:466 RetIndex:2508

CompName:Chloramphenicol-2TMS ; 2,2-dichloro-N-[(1R,2R)-1,3-dihydroxy-1-(4-nitrophenyl)propan-2-yl]acetamide

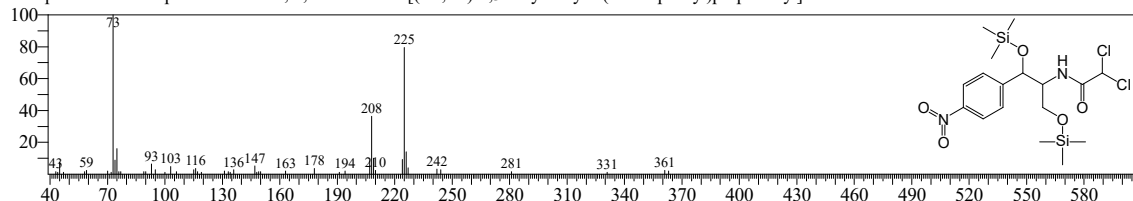

Hit#:4 Entry:10 Library:OA\_TMS\_DB5\_67min\_V3.lib

SI:39 Formula:C10H24O3Si2 CAS:594-61-6 MolWeight:248 RetIndex:1067

CompName:2-Hydroxyisobutyric acid-2TMS ; 2-hydroxy-2-methylpropanoic acid

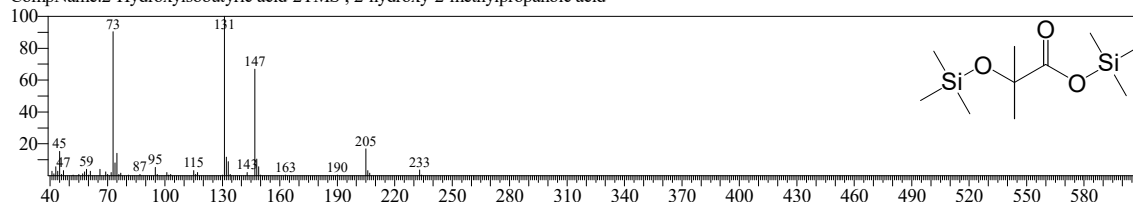

Hit#:5 Entry:3 Library:OA\_TMS\_DB5\_67min\_V3.lib

SI:39 Formula:C9H27BO3Si3 CAS:10043-35-3 MolWeight:278 RetIndex:992

CompName:Boric acid-3TMS ; boric acid

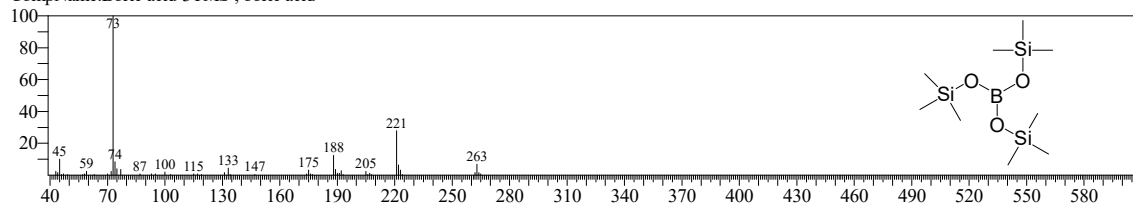

# TNAU

<< Target >>

Line#:24 R.Time:32.430(Scan#:5587) MassPeaks:338

RawMode:Averaged 32.425-32.435(5586-5588) BasePeak:73.10(898)

BG Mode:Calc. from Peak Group 1 - Event 1 Q3 Scan

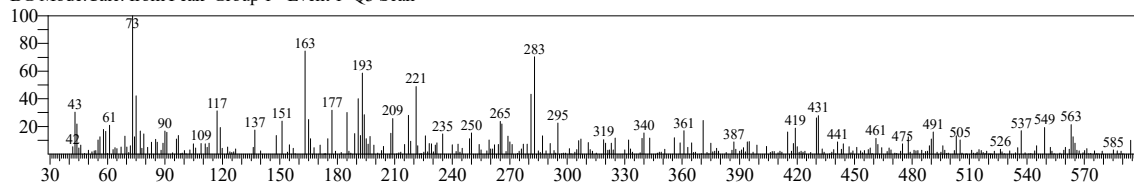

Hit#:1 Entry:194 Library:OA TMS DB5 67min V3.lib

SI:38 Formula:C15H26O3Si2 CAS:828-01-3 MolWeight:310 RetIndex:1599

CompName:3-Phenyllactic acid-2TMS ; 2-hydroxy-3-phenylpropanoic acid

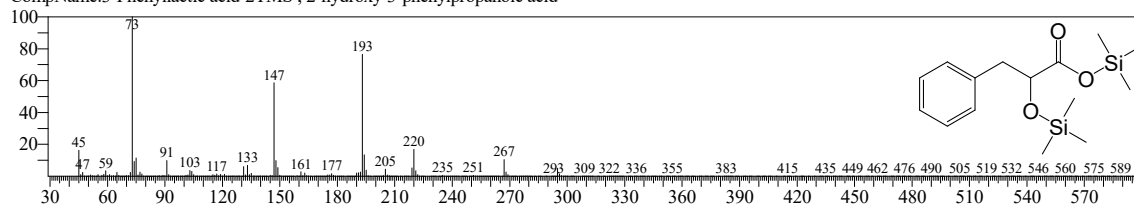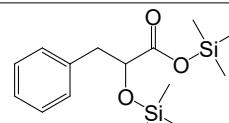

Hit#:2 Entry:290 Library:OA TMS DB5 67min V3.lib

SI:37 Formula:C13H23NO3Si2 CAS:548-93-6 MolWeight:297 RetIndex:1773

CompName:3-Hydroxyanthranilic acid-2TMS ; 2-amino-3-hydroxybenzoic acid

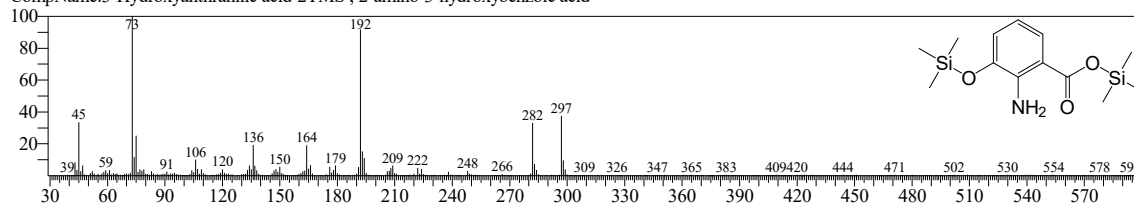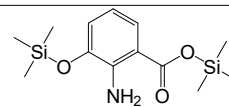

Hit#:3 Entry:150 Library:OA TMS DB5 67min V3.lib

SI:37 Formula:C15H26O3Si2 CAS:515-30-0 MolWeight:310 RetIndex:1517

CompName:2-Phenyllactic acid-2TMS ; 2-hydroxy-3-phenylpropanoic acid

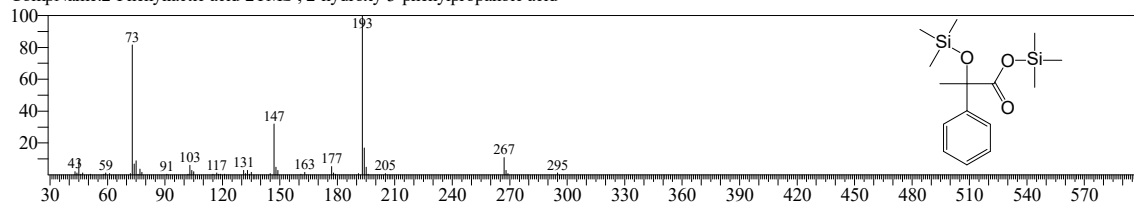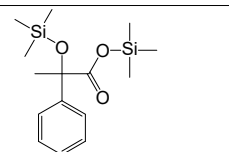

Hit#:4 Entry:200 Library:OA TMS DB5 67min V3.lib

SI:36 Formula:C14H24O3Si2 CAS:621-37-4 MolWeight:296 RetIndex:1617

CompName:3-Hydroxyphenylacetic acid-2TMS ; 2-(3-hydroxyphenyl)acetic acid

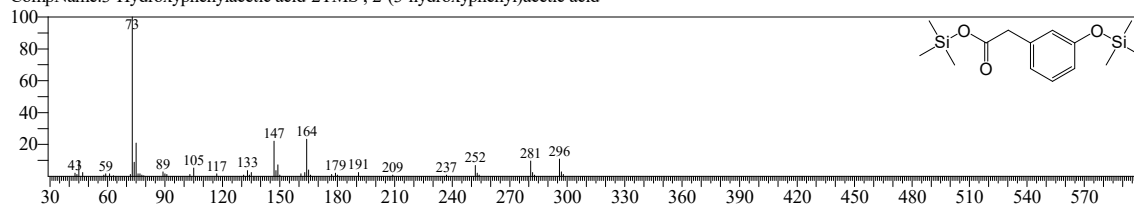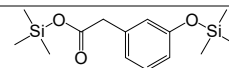

Hit#:5 Entry:328 Library:OA TMS DB5 67min V3.lib

SI:36 Formula:C13H23NO2Si2 CAS:150-13-0 MolWeight:281 RetIndex:1845

CompName:4-Aminobenzoic acid-2TMS ; 4-aminobenzoic acid

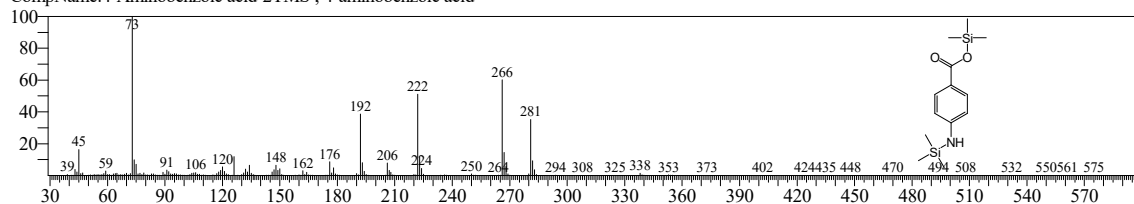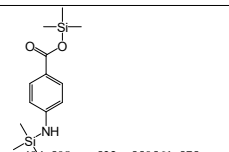

Supplement: Supplementary file 9 [file supplementary]
