# Supplementary material for: Comparative Metabolomics Profiling Reveals Key Metabolites and Associated Pathways Regulating Tuber Dormancy in White Yam (<em>Dioscorea rotundata</em>)
Source: Preprints.org preprint supplement (doi:10.20944/preprints202303.0378.v1), 2023-03-21

# TNAU

## Sample Information

Analyzed by : Admin  
 Analyzed : 02-Sep-22 7:57:53 PM  
 Sample Type : Unknown  
 Level # : 1  
 Sample Name : Sample  
 Sample ID : 10-3  
 IS Amount : [1]=1  
 Sample Amount : 1  
 Dilution Factor : 1  
 Vial # : 11  
 Injection Volume : 5.00  
 Data File : D:\GCMS-8040NX\Sep 2022\Users\01.09.2022\01092022031.qgd  
 Org Data File : D:\GCMS-8040NX\Sep 2022\Users\01.09.2022\01092022031.qgd  
 Method File : D:\GCMS-8040NX\Sep 2022\Method\Scan\_methodfile.qgm  
 Org Method File : D:\GCMS-8040NX\Sep 2022\Method\Scan\_methodfile.qgm  
 Report File :  
 Tuning File : D:\GCMS-8040NX\Aug 2022\Tuning Data\TUNING 25082022.qgt  
 Modified by : Admin  
 Modified : 05-Sep-22 11:10:36 AM

Chromatogram Sample D:\GCMS-8040NX\Sep 2022\Users\01.09.2022\01092022031.qgd

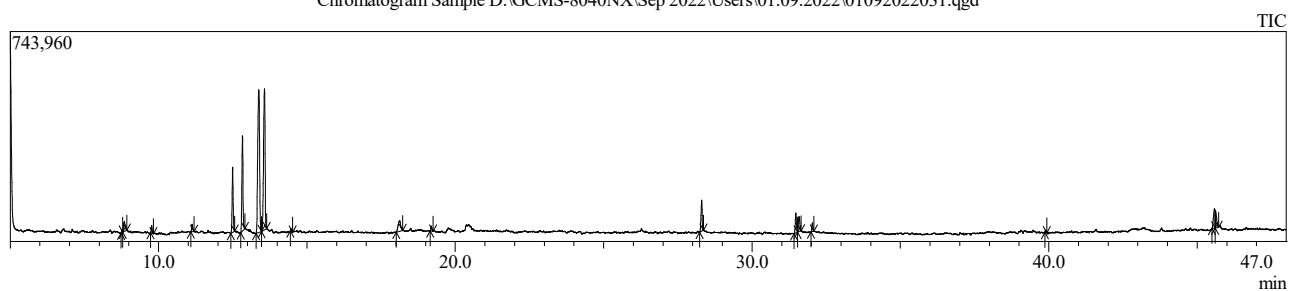

## Peak Report TIC

| Peak# | R.Time | Area    | Area%  | Height  | Height% | A/H  | Similarity | Name                                    |
|-------|--------|---------|--------|---------|---------|------|------------|-----------------------------------------|
| 1     | 8.760  | 23653   | 0.33   | 9189    | 0.43    | 2.57 | 75         | 1-Butanol, 3-methyl-, acetate           |
| 2     | 8.843  | 146433  | 2.03   | 35551   | 1.66    | 4.12 | 86         | 1-Butanol, 3-methyl-, acetate           |
| 3     | 9.768  | 53634   | 0.74   | 25707   | 1.20    | 2.09 | 95         | Pentasiloxane, dodecamethyl-            |
| 4     | 11.131 | 77073   | 1.07   | 27463   | 1.28    | 2.81 | 44         | Methyl myristoleate                     |
| 5     | 12.495 | 580069  | 8.04   | 231515  | 10.83   | 2.51 | 73         | 2,5-Cyclohexadiene-1,4-dione, dioxime   |
| 6     | 12.826 | 855915  | 11.87  | 337379  | 15.78   | 2.54 | 74         | 1,3-Benzodioxol-5-ol                    |
| 7     | 13.376 | 2187799 | 30.34  | 505469  | 23.65   | 4.33 | 53         | Methyl cis-13,16-Docosadienate          |
| 8     | 13.568 | 1783425 | 24.73  | 500325  | 23.41   | 3.56 | 53         | Methyl cis-13,16-Docosadienate          |
| 9     | 14.465 | 19455   | 0.27   | 9586    | 0.45    | 2.03 | 73         | 2,3-Dimethyl-para-anisaldehyde          |
| 10    | 18.124 | 230210  | 3.19   | 37233   | 1.74    | 6.18 | 95         | D-Allose                                |
| 11    | 19.193 | 41475   | 0.58   | 16876   | 0.79    | 2.46 | 86         | 2,4-Di-tert-butylphenoxytrimethylsilane |
| 12    | 28.301 | 290423  | 4.03   | 109161  | 5.11    | 2.66 | 95         | n-Hexadecanoic acid                     |
| 13    | 31.478 | 200946  | 2.79   | 70175   | 3.28    | 2.86 | 95         | 9,12-Octadecadienoic acid (Z,Z)-        |
| 14    | 31.585 | 177800  | 2.47   | 53055   | 2.48    | 3.35 | 88         | 7-Tetradecenal, (Z)-                    |
| 15    | 32.032 | 78272   | 1.09   | 30758   | 1.44    | 2.54 | 92         | Octadecanoic acid                       |
| 16    | 39.896 | 17175   | 0.24   | 8559    | 0.40    | 2.01 | 87         | Bis(2-ethylhexyl) phthalate             |
| 17    | 45.584 | 270339  | 3.75   | 68873   | 3.22    | 3.93 | 81         | Diosgenin                               |
| 18    | 45.620 | 176805  | 2.45   | 60521   | 2.83    | 2.92 | 34         | Methyl cis-10-heptadecenoate            |
|       |        | 7210901 | 100.00 | 2137395 | 100.00  |      |            |                                         |

Library

# TNAU

<< Target >>

Line#:1 R.Time:8.760(Scan#:753) MassPeaks:314

RawMode:Averaged 8.755-8.765(752-754) BasePeak:43.00(1305)

BG Mode:Calc. from Peak Group 1 - Event 1 Q3 Scan

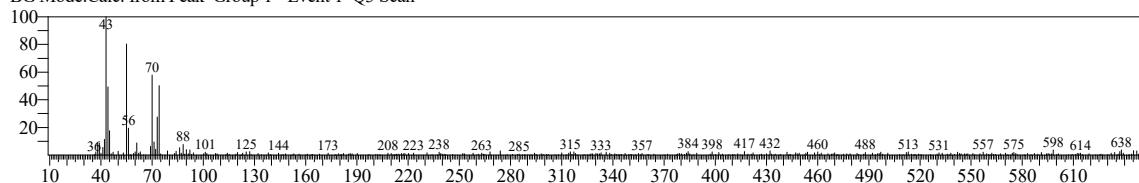

Hit#:1 Entry:6784 Library:NIST20R.lib

SI:75 Formula:C7H14O2 CAS:123-92-2 MolWeight:130 RetIndex:820

CompName:1-Butanol, 3-methyl-, acetate \$\$ Isopentyl alcohol, acetate \$\$ Acetic acid, 3-methylbutyl ester \$\$ Banana oil \$\$ Isoamyl acetate \$\$ Isoamyl etha

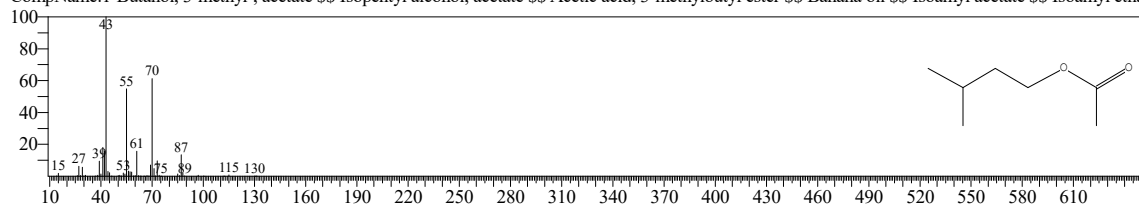

Hit#:2 Entry:32045 Library:NIST20M1.lib

SI:74 Formula:C6H10N2O4 CAS:0-00-0 MolWeight:174 RetIndex:1774

CompName:3-(N'-Acetylhydrazinecarbonyl)propanoic acid

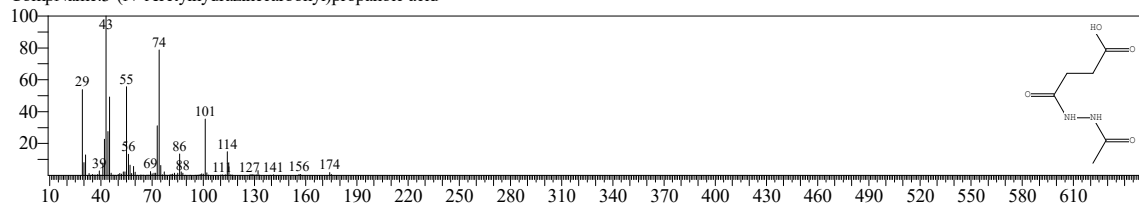

Hit#:3 Entry:8685 Library:NIST20M1.lib

SI:73 Formula:C7H14O2 CAS:628-63-7 MolWeight:130 RetIndex:884

CompName:Acetic acid, pentyl ester \$\$ n-Amyl acetate \$\$ n-Pentyl acetate \$\$ Amyl acetate \$\$ Birnenöl \$\$ Pentyl acetate \$\$ Acetic acid, amyl ester \$\$ An

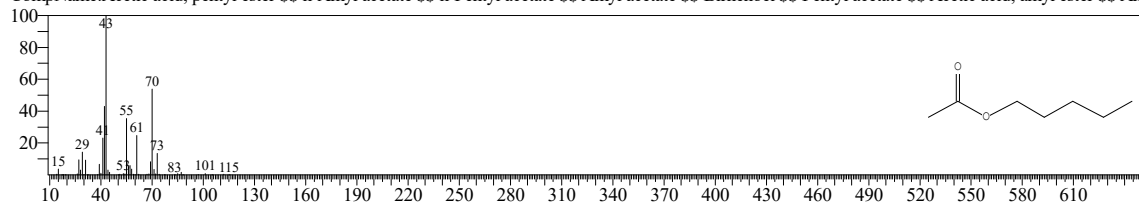

Hit#:4 Entry:5225 Library:NIST20M1.lib

SI:73 Formula:C4H6O4 CAS:17675-99-9 MolWeight:118 RetIndex:1201

CompName:2-Furanone, 3,4-dihydroxytetrahydro \$\$ 3,4-Dihydroxydihydro-2(3H)-furanone #

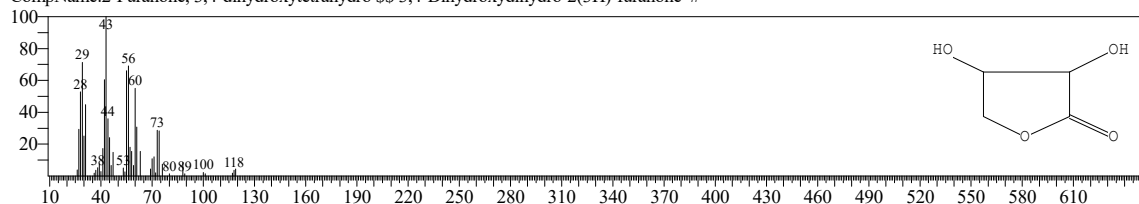

Hit#:5 Entry:4940 Library:NIST20M1.lib

SI:73 Formula:C6H12O2 CAS:54073-43-7 MolWeight:116 RetIndex:916

CompName:2-Hydroxy-3-hexanone \$\$ 3-Hexanone, 2-hydroxy- \$\$ 1-Hydroxyethyl propyl ketone

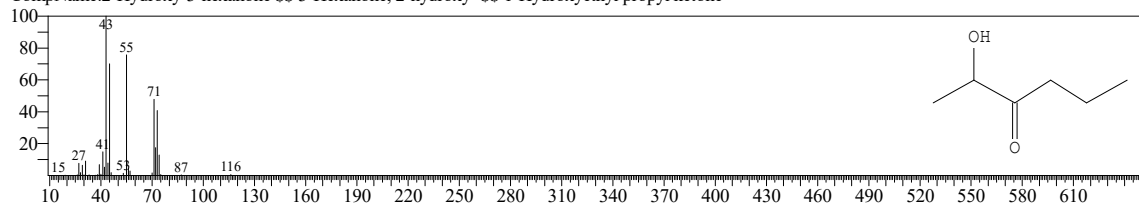

# TNAU

<< Target >>

Line# 2 R.Time: 8.845 (Scan#: 770) MassPeaks: 347

RawMode: Averaged 8.840-8.850 (769-771) BasePeak: 43.05 (6915)

BG Mode: Calc. from Peak Group 1 - Event 1 Q3 Scan

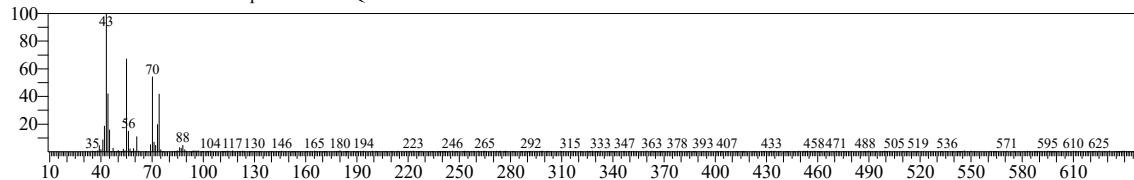

Hit#: 1 Entry: 6784 Library: NIST20R.lib

SI: 86 Formula: C<sub>7</sub>H<sub>14</sub>O<sub>2</sub> CAS: 123-92-2 MolWeight: 130 RetIndex: 820

CompName: 1-Butanol, 3-methyl-, acetate \$\$ Isopentyl alcohol, acetate \$\$ Acetic acid, 3-methylbutyl ester \$\$ Banana oil \$\$ Isoamyl acetate \$\$ Isoamyl etha

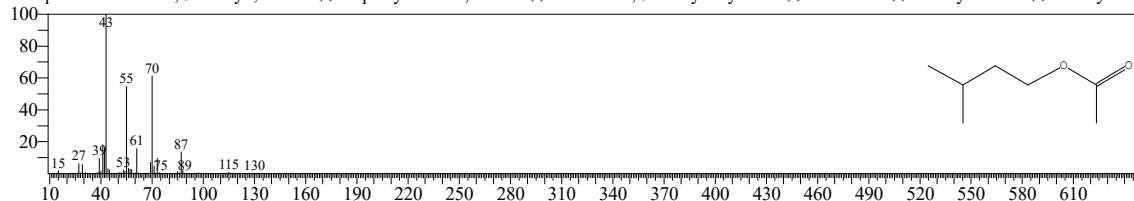

Hit#: 2 Entry: 6819 Library: NIST20R.lib

SI: 83 Formula: C<sub>7</sub>H<sub>14</sub>O<sub>2</sub> CAS: 624-41-9 MolWeight: 130 RetIndex: 820

CompName: 1-Butanol, 2-methyl-, acetate \$\$ 2-Methyl-1-butyl acetate \$\$ 2-Methylbutyl acetate \$\$ Acetic acid 2-methylbutyl ester \$\$ 2-Methylbutyl acetate :

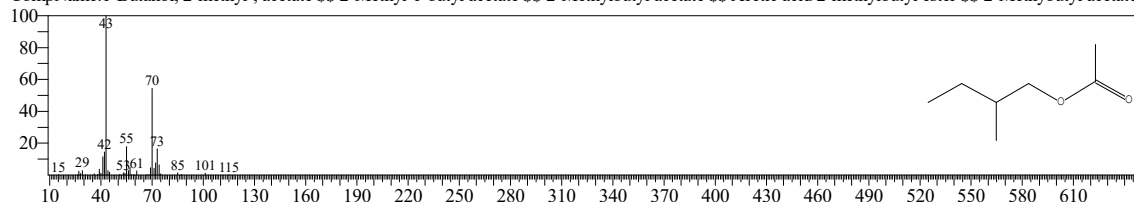

Hit#: 3 Entry: 8685 Library: NIST20M1.lib

SI: 83 Formula: C<sub>7</sub>H<sub>14</sub>O<sub>2</sub> CAS: 628-63-7 MolWeight: 130 RetIndex: 884

CompName: Acetic acid, pentyl ester \$\$ n-Amyl acetate \$\$ n-Pentyl acetate \$\$ Amyl acetate \$\$ Birnenöl \$\$ Pentyl acetate \$\$ Acetic acid, amyl ester \$\$ Arr

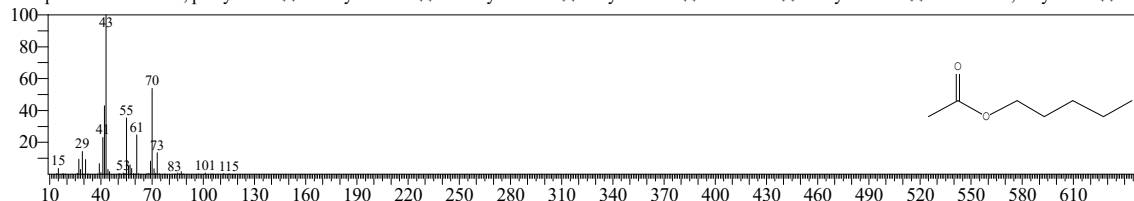

Hit#: 4 Entry: 4411 Library: NIST20R.lib

SI: 80 Formula: C<sub>6</sub>H<sub>12</sub>O<sub>2</sub> CAS: 110-45-2 MolWeight: 116 RetIndex: 818

CompName: 1-Butanol, 3-methyl-, formate \$\$ Isopentyl alcohol, formate \$\$ Isoamyl formate \$\$ Isoamyl methanoate \$\$ Isopentyl formate \$\$ 3-Methylbutyl

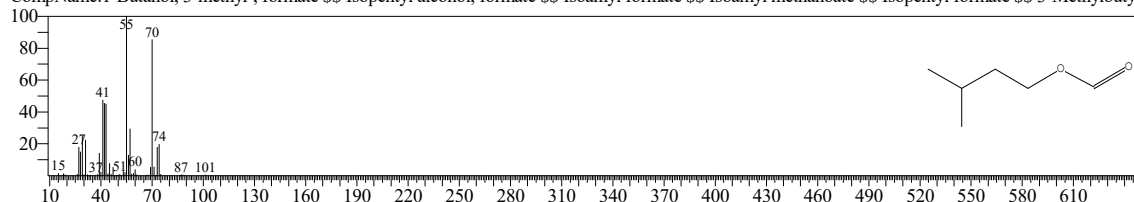

Hit#: 5 Entry: 1220 Library: NIST20R.lib

SI: 80 Formula: C<sub>4</sub>H<sub>8</sub>O<sub>2</sub> CAS: 590-90-9 MolWeight: 88 RetIndex: 798

CompName: CH<sub>3</sub>C(O)CH<sub>2</sub>CH<sub>2</sub>OH \$\$ Methylolacetone \$\$ Monomethylolacetone \$\$ 3-Ketobutan-1-ol \$\$ 3-Oxo-1-butanol \$\$ 3-Oxobutanol \$\$ 4-Butanol-

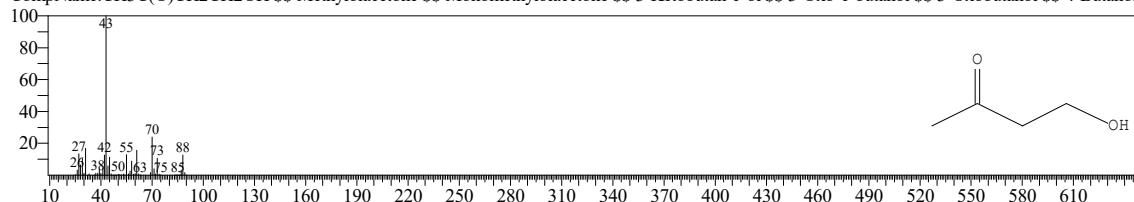

# TNAU

<< Target >>

Line#3 R.Time:9.770(Scan#:955) MassPeaks:339

RawMode:Averaged 9.765-9.775(954-956) BasePeak:281.00(6045)

BG Mode:Calc. from Peak Group 1 - Event 1 Q3 Scan

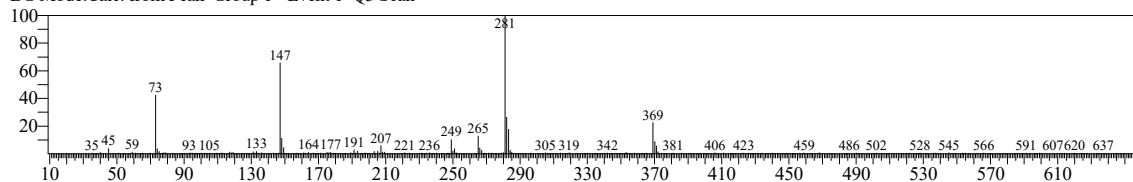

Hit#1 Entry:40975 Library:NIST20R.lib

SI:95 Formula:C<sub>12</sub>H<sub>36</sub>O<sub>4</sub>Si<sub>5</sub> CAS:141-63-9 MolWeight:384 RetIndex:1068

CompName:Pentasiloxane, dodecamethyl- \$\$ Dodecamethylpentasiloxane \$\$ 1,1,1,3,3,5,5,7,7,9,9-Dodecamethylpentasiloxane #

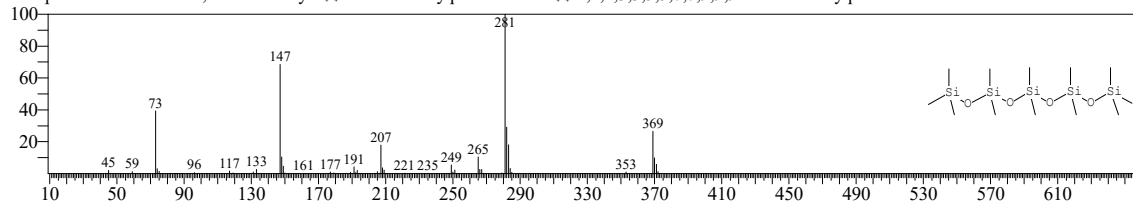

Hit#2 Entry:249272 Library:NIST20M1.lib

SI:84 Formula:C<sub>12</sub>H<sub>36</sub>O<sub>4</sub>Si<sub>5</sub> CAS:3555-47-3 MolWeight:384 RetIndex:1068

CompName:Trisiloxane, 1,1,1,5,5,5-hexamethyl-3,3-bis[(trimethylsilyl)oxy]- \$\$ Tetrakis(trimethylsiloxy)silane \$\$ Trisiloxane, 1,1,1,5,5,5-hexamethyl-3,3-b

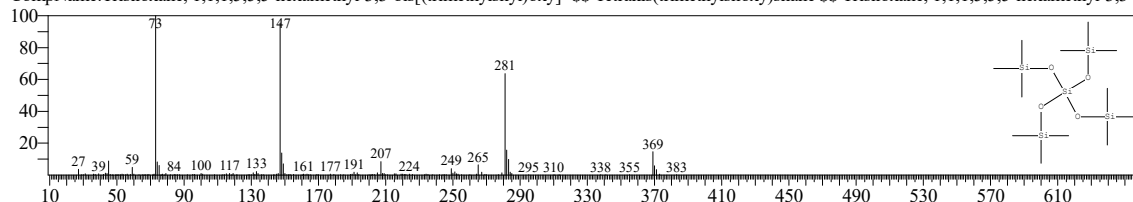

Hit#3 Entry:27848 Library:NIST20M2.lib

SI:82 Formula:C<sub>18</sub>H<sub>48</sub>O<sub>4</sub>Si<sub>5</sub> CAS:0-00-0 MolWeight:468 RetIndex:1495

CompName:1,3,5,7,9-Pentasiloxane, 1,1,3,3,5,5,7,7,9,9-decamethyl-1,9-di(tert.butyl)-

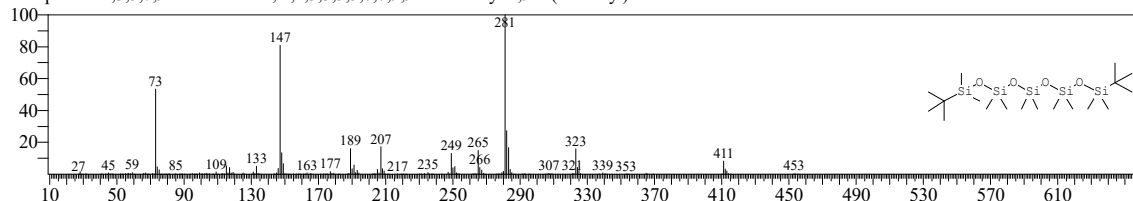

Hit#4 Entry:249271 Library:NIST20M1.lib

SI:79 Formula:C<sub>12</sub>H<sub>36</sub>O<sub>4</sub>Si<sub>5</sub> CAS:38146-99-5 MolWeight:384 RetIndex:1068

CompName:1,1,1,3,5,5,7,7-Nonamethyl-3-(trimethylsiloxy)tetrasiloxane \$\$ 1,1,1,3,3,5,5,7,7-Nonamethyl-5-[(trimethylsilyl)oxy]tetrasiloxane #

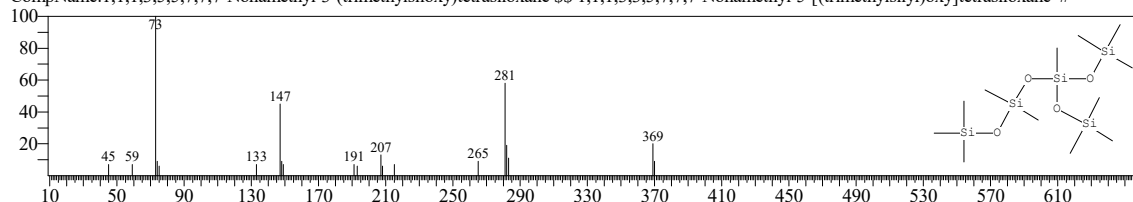

Hit#5 Entry:158097 Library:NIST20M1.lib

SI:77 Formula:C<sub>14</sub>H<sub>24</sub>O<sub>3</sub>Si<sub>2</sub> CAS:0-00-0 MolWeight:296 RetIndex:1625

CompName:2,6-Dihydroxyacetophenone, 2TMS derivative \$\$ 2',6'-Dihydroxyacetophenone, bis(trimethylsilyl) ether

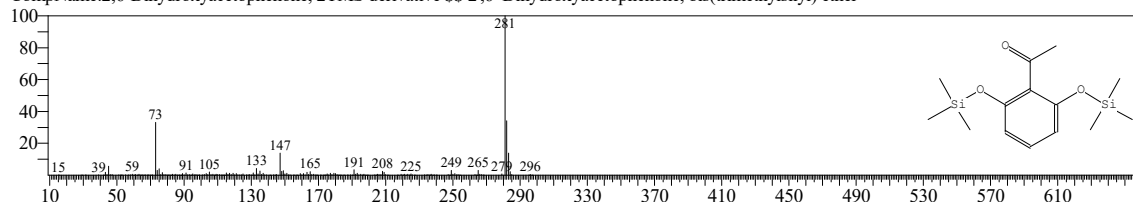

# TNAU

<< Target >>

Line#:4 R.Time:11.130(Scan#:1227) MassPeaks:329

RawMode:Averaged 11.125-11.135(1226-1228) BasePeak:69.05(3603)

BG Mode:Calc. from Peak Group 1 - Event 1 Q3 Scan

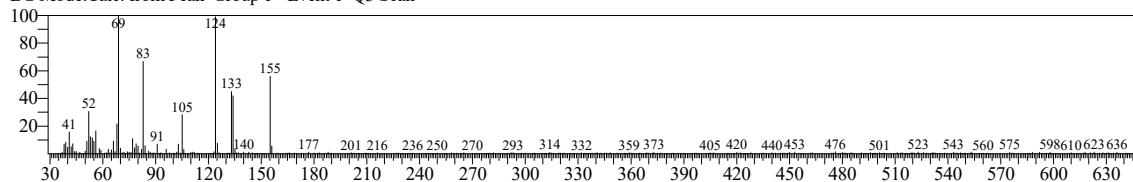

Hit#:1 Entry:9 Library:FA\_ME\_SP2560\_EI\_V3.lib

SI:44 Formula:C15H28O2 CAS:544-64-9 MolWeight:240 RetIndex:2283

CompName:Methyl myristoleate ; (Z)-tetradec-9-enoic acid

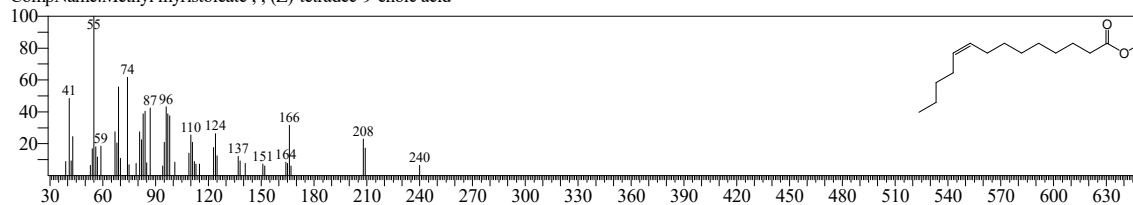

Hit#:2 Entry:11 Library:FA\_ME\_SP2560\_EI\_V3.lib

SI:42 Formula:C16H30O2 CAS:84743-29-3 MolWeight:254 RetIndex:2388

CompName:Methyl cis-10-pentadecenoate ; (Z)-pentadec-10-enoic acid

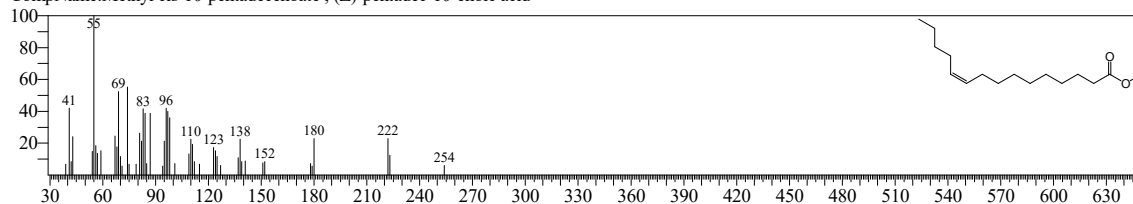

Hit#:3 Entry:13 Library:FA\_ME\_SP2560\_EI\_V3.lib

SI:42 Formula:C17H32O2 CAS:373-49-9 MolWeight:268 RetIndex:2478

CompName:Methyl palmitoleate ; Hexadec-9-enoic acid

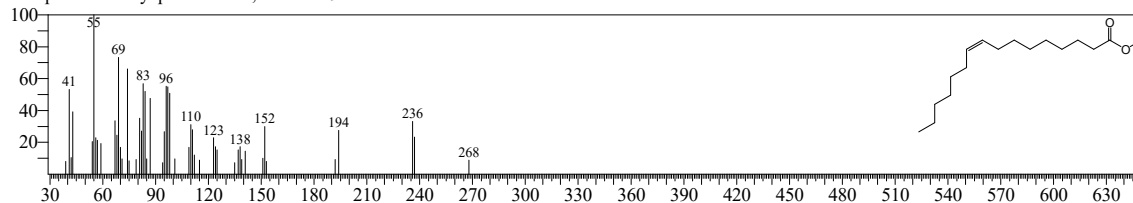

Hit#:4 Entry:24 Library:FA\_ME\_SP2560\_EI\_V3.lib

SI:42 Formula:C21H40O2 CAS:5561-99-9 MolWeight:324 RetIndex:2874

CompName:Methyl cis-11-icosenoate ; Icos-11-enoic acid

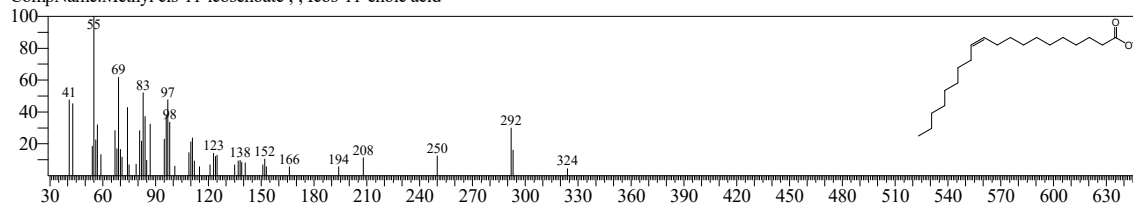

Hit#:5 Entry:34 Library:FA\_ME\_SP2560\_EI\_V3.lib

SI:42 Formula:C23H42O2 CAS:7370-49-2 MolWeight:350 RetIndex:3169

CompName:Methyl cis-13,16-Docosadienate ; (13Z,16E)-docosa-13,16-dienoic acid

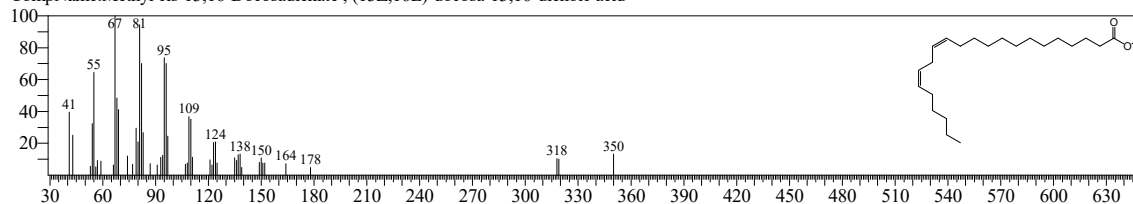

# TNAU

<< Target >>

Line#:5 R.Time:12.495(Scan#:1500) MassPeaks:411

RawMode:Averaged 12.490-12.500(1499-1501) BasePeak:138.05(80362)

BG Mode:Calc. from Peak Group 1 - Event 1 Q3 Scan

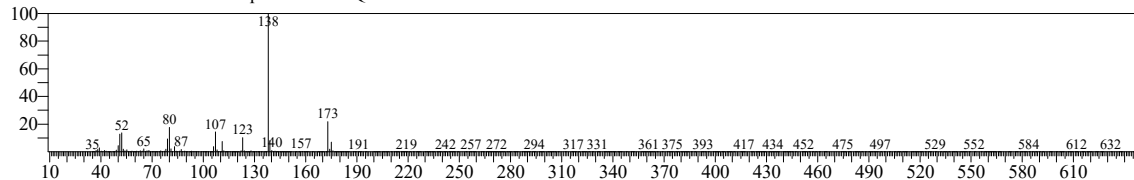

Hit#:1 Entry:8360 Library:NIST20R.lib

SI:73 Formula:C<sub>6</sub>H<sub>6</sub>N<sub>2</sub>O<sub>2</sub> CAS:105-11-3 MolWeight:138 RetIndex:1349

CompName:2,5-Cyclohexadiene-1,4-dione, dioxime \$\$ p-Benzoquinone, dioxime \$\$ p-Quinone dioxime \$\$ p-Quinone oxime \$\$ Benzoquinone dioxime \$\$

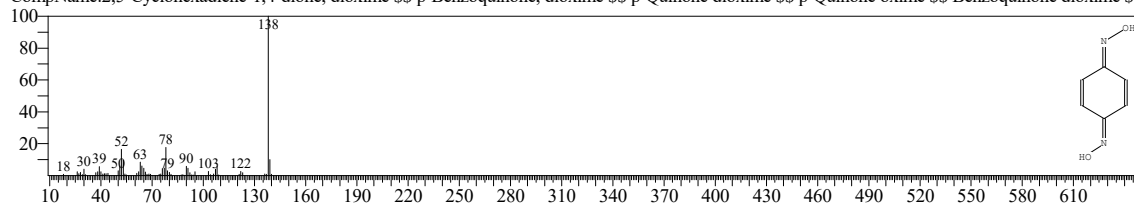

Hit#:2 Entry:25 Library:FA ME SP2560 EI V3.lib

SI:33 Formula:C<sub>19</sub>H<sub>32</sub>O<sub>2</sub> CAS:463-40-1 MolWeight:292 RetIndex:2892

CompName:Methyl linolenate ; (9Z,12Z,15Z)-octadeca-9,12,15-trienoic acid

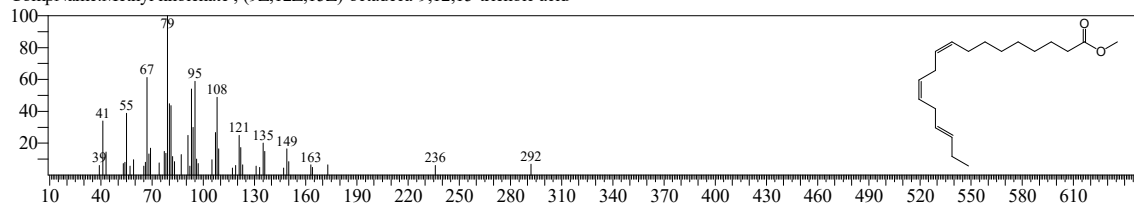

Hit#:3 Entry:137 Library:OA TMS\_DB5\_67min V3.lib

SI:33 Formula:C<sub>9</sub>H<sub>14</sub>N<sub>2</sub>OSi CAS:98-92-0 MolWeight:194 RetIndex:1486

CompName:Niacinamide-TMS ; pyridine-3-carboxamide

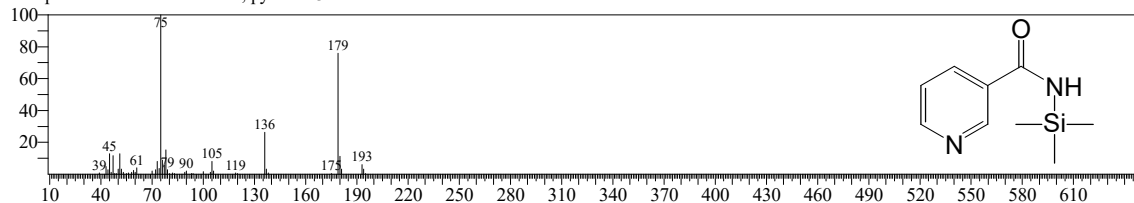

Hit#:4 Entry:21 Library:FA ME SP2560 EI V3.lib

SI:33 Formula:C<sub>19</sub>H<sub>34</sub>O<sub>2</sub> CAS:60-33-3 MolWeight:294 RetIndex:2775

CompName:Methyl linoleate ; Octadeca-9,12-dienoic acid

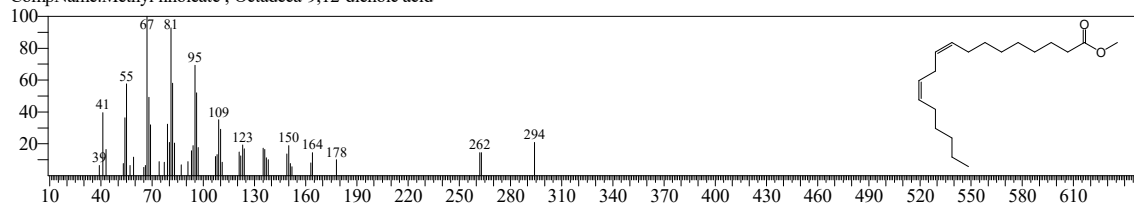

Hit#:5 Entry:34 Library:FA ME SP2560 EI V3.lib

SI:33 Formula:C<sub>23</sub>H<sub>42</sub>O<sub>2</sub> CAS:7370-49-2 MolWeight:350 RetIndex:3169

CompName:Methyl cis-13,16-Docosadienate ; (13Z,16E)-docosa-13,16-dienoic acid

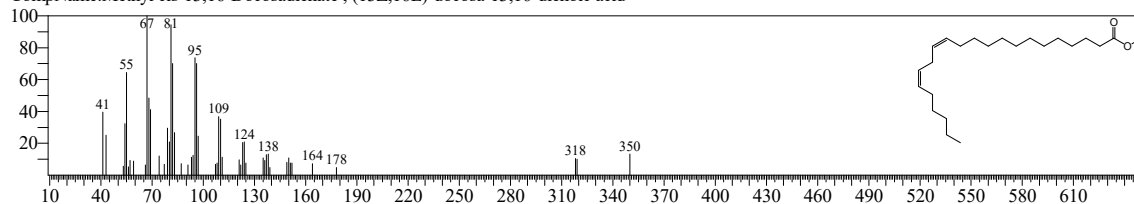

# TNAU

<< Target >>

Line#6 R.Time:12.825(Scan#:1566) MassPeaks:274

RawMode:Averaged 12.820-12.830(1565-1567) BasePeak:138.05(119343)

BG Mode:Calc. from Peak Group 1 - Event 1 Q3 Scan

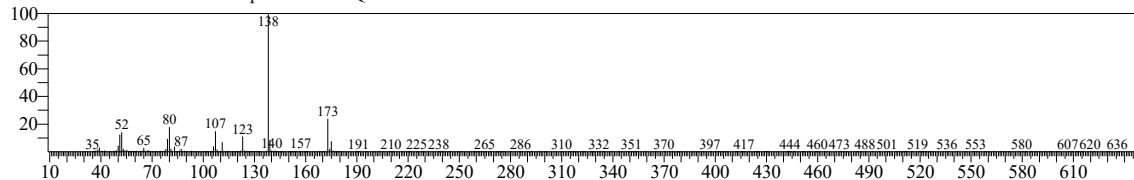

Hit#1 Entry:11187 Library:NIST20M1.lib

SI:74 Formula:C7H6O3 CAS:533-31-3 MolWeight:138 RetIndex:1245

CompName:1,3-Benzodioxol-5-ol \$\$ Phenol, 3,4-(methylenedioxy)- \$\$ Sesamol \$\$ 3,4-(Methylenedioxy)phenol \$\$ 5-Hydroxy-1,3-benzodioxole \$\$ Methy

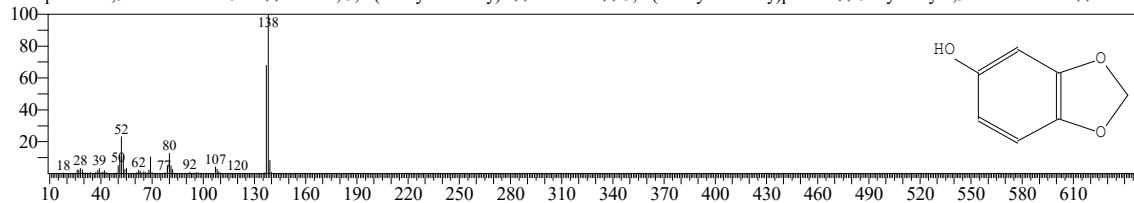

Hit#2 Entry:8360 Library:NIST20R.lib

SI:73 Formula:C6H6N2O2 CAS:105-11-3 MolWeight:138 RetIndex:1349

CompName:2,5-Cyclohexadiene-1,4-dione, dioxime \$\$ p-Benzoquinone, dioxime \$\$ p-Quinone dioxime \$\$ p-Quinone oxime \$\$ Benzoquinone dioxime \$\$

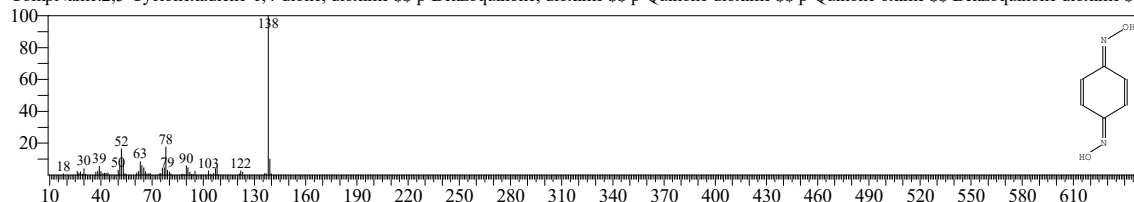

Hit#3 Entry:11188 Library:NIST20M1.lib

SI:72 Formula:C7H6O3 CAS:69393-72-2 MolWeight:138 RetIndex:1245

CompName:2,3-Methylenedioxyphenol \$\$ 1,3-Benzodioxol-4-ol #

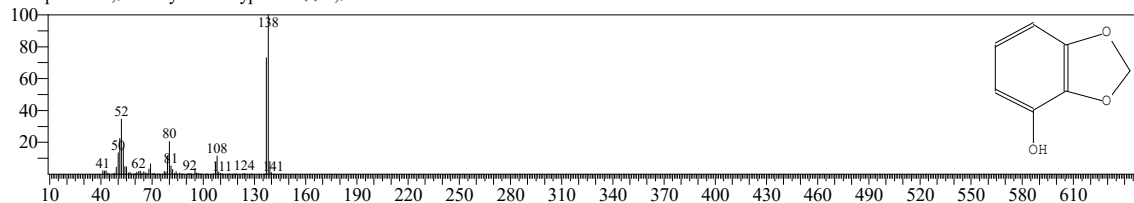

Hit#4 Entry:8422 Library:NIST20R.lib

SI:71 Formula:C7H10N2O CAS:25680-58-4 MolWeight:138 RetIndex:1070

CompName:2-Ethyl-3-methoxypyrazine \$\$ 2-Methoxy-3-ethylpyrazine \$\$ Pyrazine, 2-ethyl-3-methoxy- \$\$ 3-Ethyl-2-methoxypyrazine \$\$ Pyrazine, 3-ethyl-

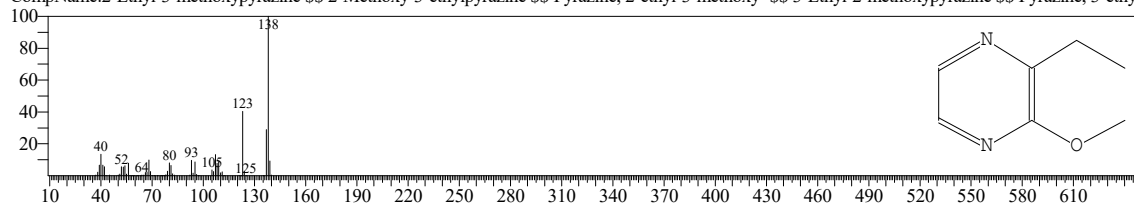

Hit#5 Entry:11222 Library:NIST20M1.lib

SI:70 Formula:C7H10N2O CAS:3471-32-7 MolWeight:138 RetIndex:1325

CompName:Hydrazine, (4-methoxyphenyl)- \$\$ (p-Methoxyphenyl)hydrazine \$\$ 1-(4-Methoxyphenyl)hydrazine #

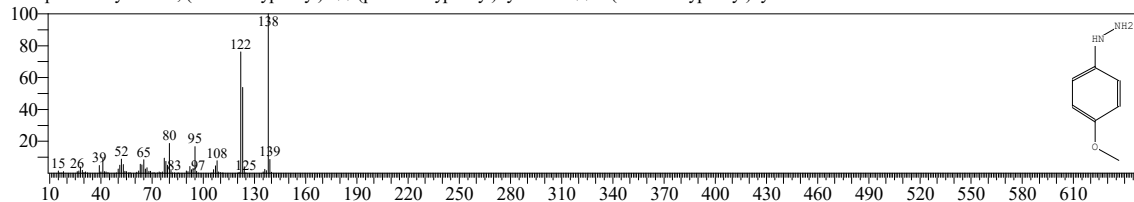

# TNAU

<< Target >>

Line#:7 R.Time:13.375(Scan#:1676) MassPeaks:363

RawMode:Averaged 13.370-13.380(1675-1677) BasePeak:155.05(83769)

BG Mode:Calc. from Peak Group 1 - Event 1 Q3 Scan

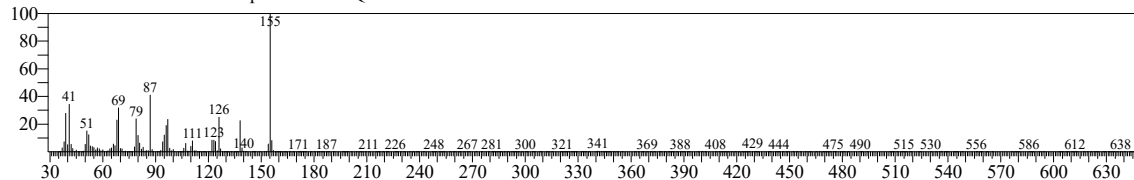

Hit#:1 Entry:34 Library:FA\_ME\_SP2560\_EI\_V3.lib

SI:53 Formula:C23H42O2 CAS:7370-49-2 MolWeight:350 RetIndex:3169

CompName:Methyl cis-13,16-Docosadienate ; (13Z,16E)-docosa-13,16-dienoic acid

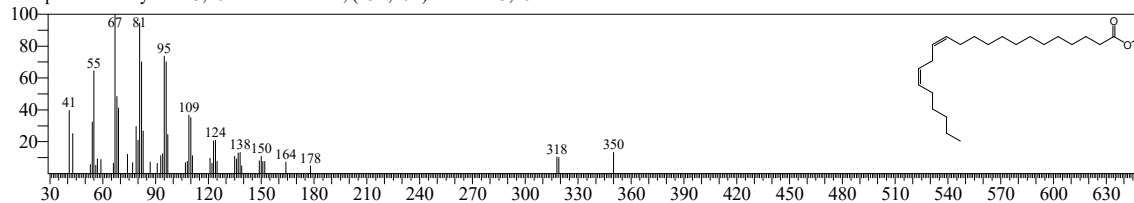

Hit#:2 Entry:21 Library:FA\_ME\_SP2560\_EI\_V3.lib

SI:52 Formula:C19H34O2 CAS:60-33-3 MolWeight:294 RetIndex:2775

CompName:Methyl linoleate ; Octadeca-9,12-dienoic acid

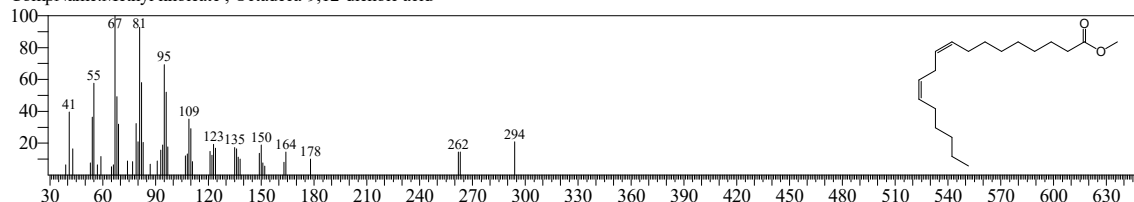

Hit#:3 Entry:20 Library:FA\_ME\_SP2560\_EI\_V3.lib

SI:51 Formula:C19H34O2 CAS:506-21-8 MolWeight:294 RetIndex:2727

CompName:Methyl linolelaidate ; (9E,12E)-octadeca-9,12-dienoic acid

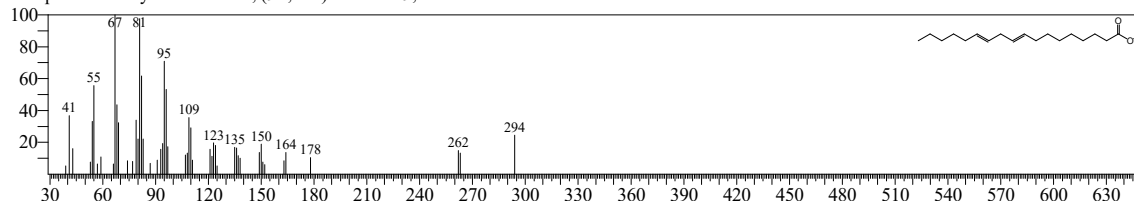

Hit#:4 Entry:11 Library:FA\_ME\_SP2560\_EI\_V3.lib

SI:51 Formula:C16H30O2 CAS:84743-29-3 MolWeight:254 RetIndex:2388

CompName:Methyl cis-10-pentadecenoate ; (Z)-pentadec-10-enoic acid

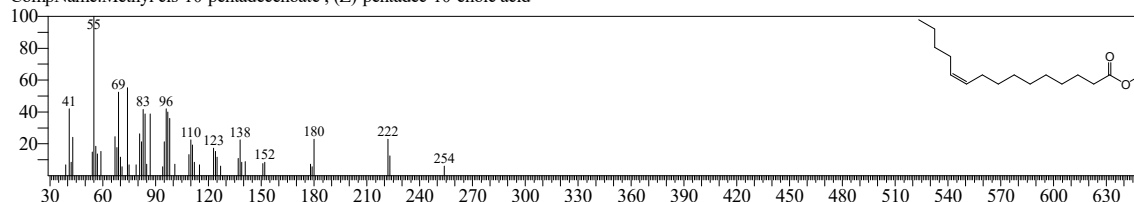

Hit#:5 Entry:27 Library:FA\_ME\_SP2560\_EI\_V3.lib

SI:51 Formula:C21H38O2 CAS:2091-39-6 MolWeight:322 RetIndex:2973

CompName:Methyl cis-11,14-Icosadienoate ; ; Icosa-11,14-dienoic acid

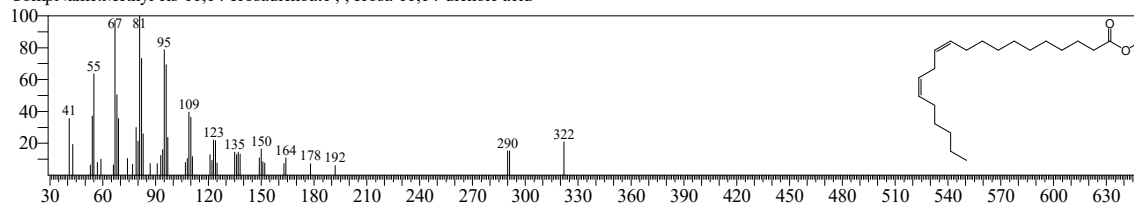



# TNAU

<< Target >>

Line#:8 R.Time:13.570(Scan#:1715) MassPeaks:376

RawMode:Averaged 13.565-13.575(1714-1716) BasePeak:155.05(83287)

BG Mode:Calc. from Peak Group 1 - Event 1 Q3 Scan

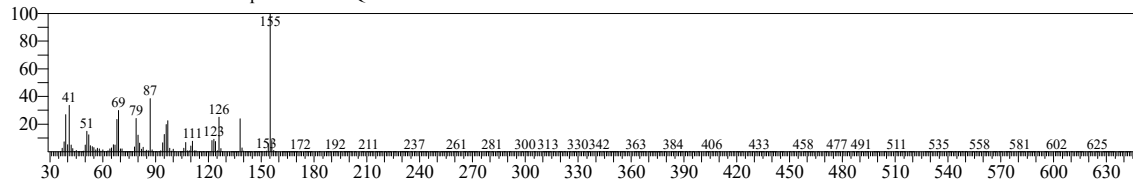

Hit#:1 Entry:34 Library:FA\_ME\_SP2560\_EI\_V3.lib

SI:53 Formula:C23H42O2 CAS:7370-49-2 MolWeight:350 RetIndex:3169

CompName:Methyl cis-13,16-Docosadienate ; (13Z,16E)-docosa-13,16-dienoic acid

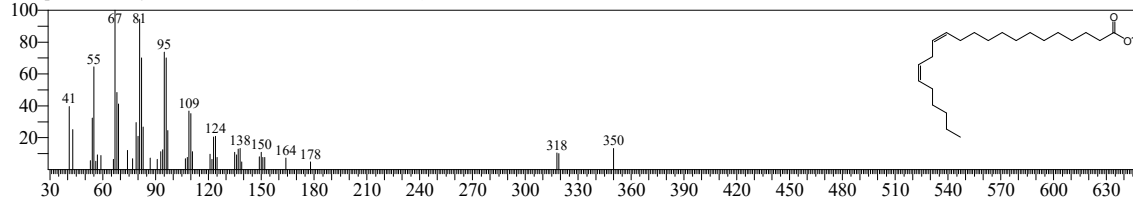

Hit#:2 Entry:21 Library:FA\_ME\_SP2560\_EI\_V3.lib

SI:52 Formula:C19H34O2 CAS:60-33-3 MolWeight:294 RetIndex:2775

CompName:Methyl linoleate ; Octadeca-9,12-dienoic acid

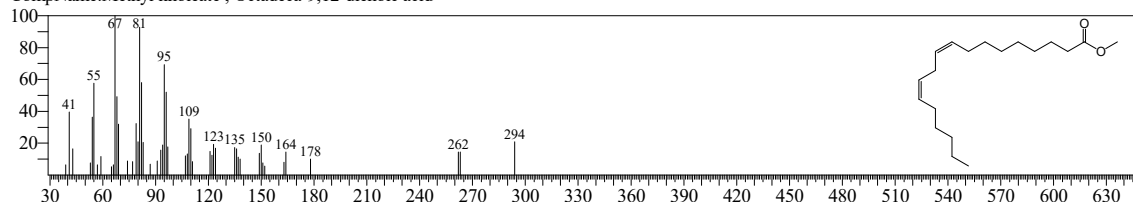

Hit#:3 Entry:20 Library:FA\_ME\_SP2560\_EI\_V3.lib

SI:51 Formula:C19H34O2 CAS:506-21-8 MolWeight:294 RetIndex:2727

CompName:Methyl linolelaidate ; (9E,12E)-octadeca-9,12-dienoic acid

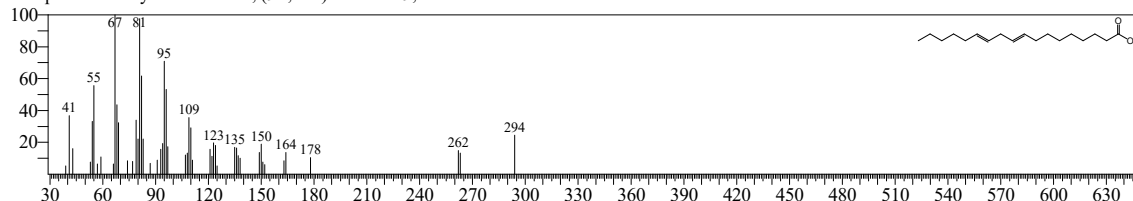

Hit#:4 Entry:11 Library:FA\_ME\_SP2560\_EI\_V3.lib

SI:51 Formula:C16H30O2 CAS:84743-29-3 MolWeight:254 RetIndex:2388

CompName:Methyl cis-10-pentadecenoate ; (Z)-pentadec-10-enoic acid

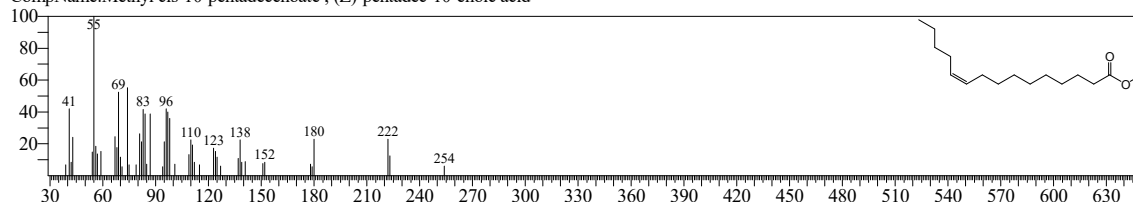

Hit#:5 Entry:27 Library:FA\_ME\_SP2560\_EI\_V3.lib

SI:51 Formula:C21H38O2 CAS:2091-39-6 MolWeight:322 RetIndex:2973

CompName:Methyl cis-11,14-Icosadienoate ; ; Icosa-11,14-dienoic acid

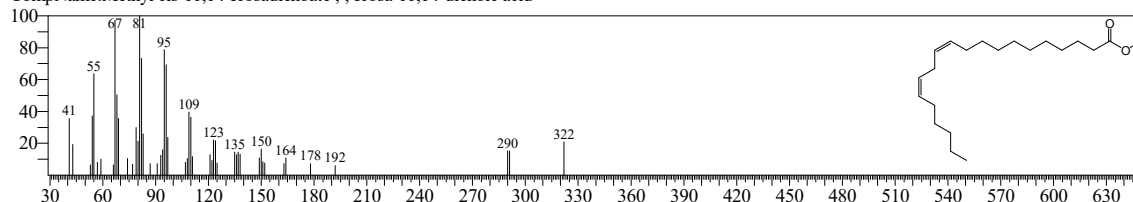

# TNAU

<< Target >>

Line#9 R.Time:14.465(Scan#:1894) MassPeaks:345

RawMode:Averaged 14.460-14.470(1893-1895) BasePeak:163.10(1451)

BG Mode:Calc. from Peak Group 1 - Event 1 Q3 Scan

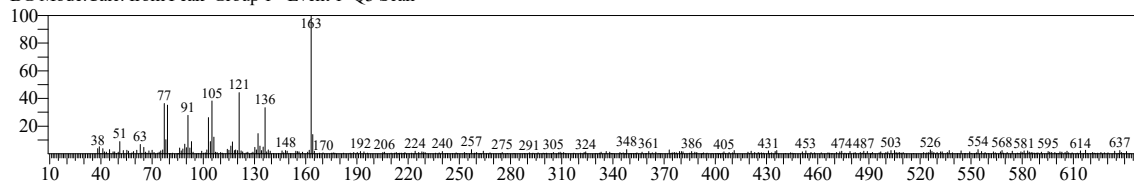

Hit#1 Entry:25351 Library:NIST20M1.lib

SI:73 Formula:C10H12O2 CAS:38998-17-3 MolWeight:164 RetIndex:1398

CompName:2,3-Dimethyl-para-anisaldehyde \$\$ Benzaldehyde, 4-methoxy-2,3-dimethyl- \$\$ 4-Methoxy-2,3-dimethylbenzaldehyde #

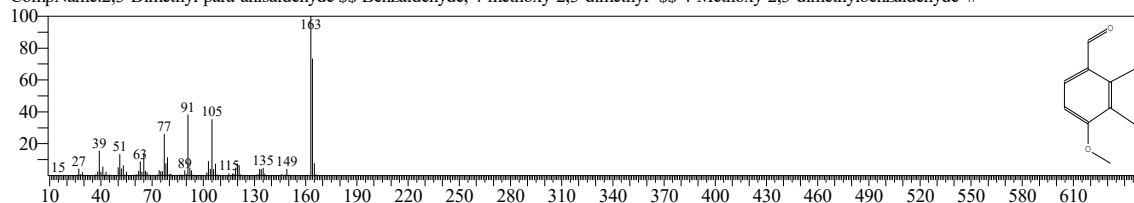

Hit#2 Entry:57597 Library:NIST20M1.lib

SI:71 Formula:C10H11N3S CAS:39181-45-8 MolWeight:205 RetIndex:1890

CompName:5-(4-Methylbenzyl)-1,3,4-thiadiazol-2-amine \$\$ 1,3,4-Thiadiazol-2-amine, 5-[(4-methylphenyl)methyl]- \$\$ 5-[(4-Methylphenyl)methyl]-1,3,4-tl

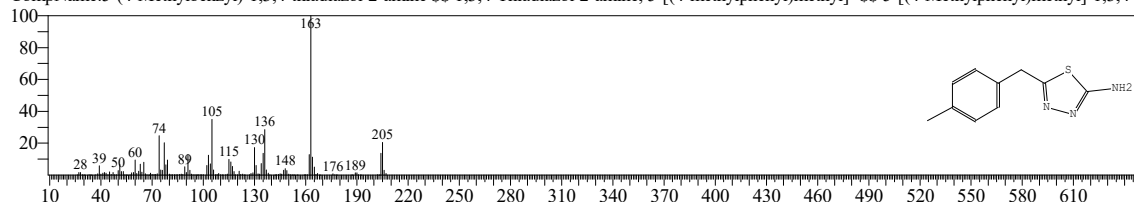

Hit#3 Entry:25340 Library:NIST20M1.lib

SI:71 Formula:C10H12O2 CAS:6745-75-1 MolWeight:164 RetIndex:1398

CompName:2,5-Dimethyl-para-anisaldehyde \$\$ 2,5-Dimethyl-4-methoxybenzaldehyde \$\$ Benzaldehyde, 4-methoxy-2,5-dimethyl- \$\$ 4-Methoxy-2,5-dimet

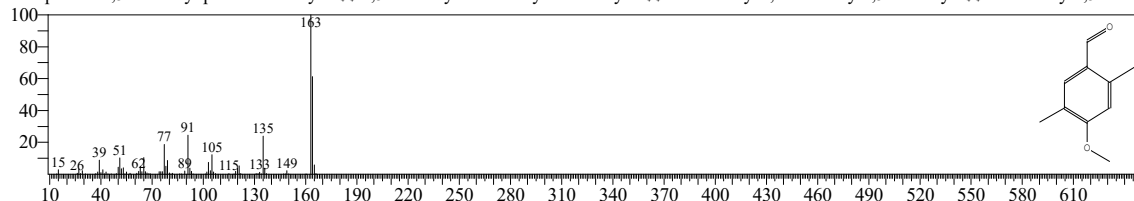

Hit#4 Entry:530 Library:OA\_TMS\_DB5\_67min\_V3.lib

SI:48 Formula:C23H25N CAS:13042-18-7 MolWeight:315 RetIndex:2545

CompName:Fendiline ; 3,3-diphenyl-N-(1-phenylethyl)propan-1-amine

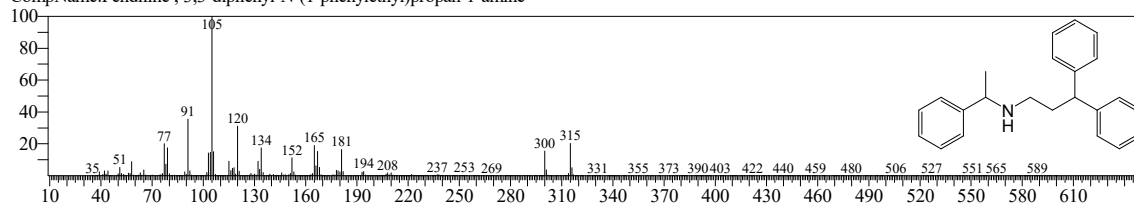

Hit#5 Entry:38 Library:FA\_ME\_SP2560\_EI\_V3.lib

SI:45 Formula:C23H34O2 CAS:6217-54-5 MolWeight:342 RetIndex:3514

CompName:Methyl cis-4,7,10,13,16,19-Docosahexaenoate ; Docosa-4,7,10,13,16,19-hexaenoic acid

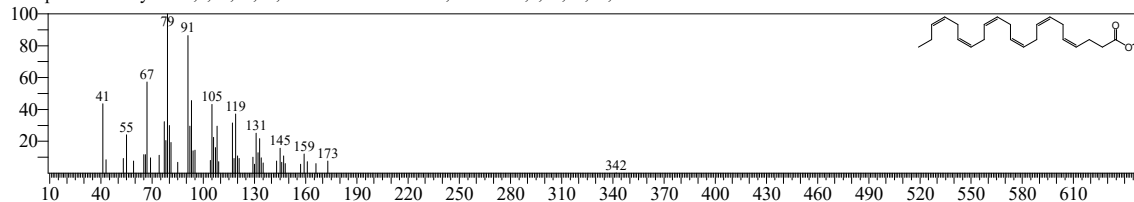

# TNAU

<< Target >>

Line#:10 R.Time:18.125(Scan#:2626) MassPeaks:384

RawMode:Averaged 18.120-18.130(2625-2627) BasePeak:60.00(8689)

BG Mode:Calc. from Peak Group 1 - Event 1 Q3 Scan

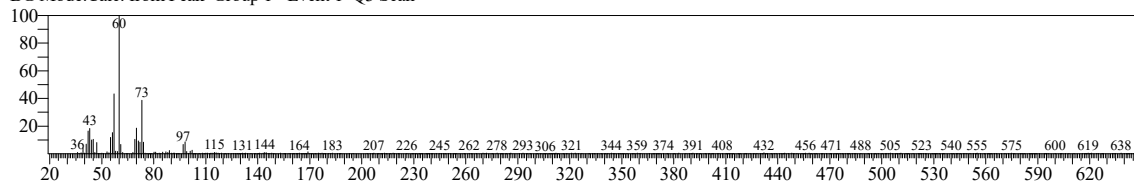

Hit#:1 Entry:36240 Library:NIST20M1.lib

SI:95 Formula:C<sub>6</sub>H<sub>12</sub>O<sub>6</sub> CAS:2595-97-3 MolWeight:180 RetIndex:1698

CompName:D-Allose \$\$ .beta.-D-Allose \$\$ Hexose #

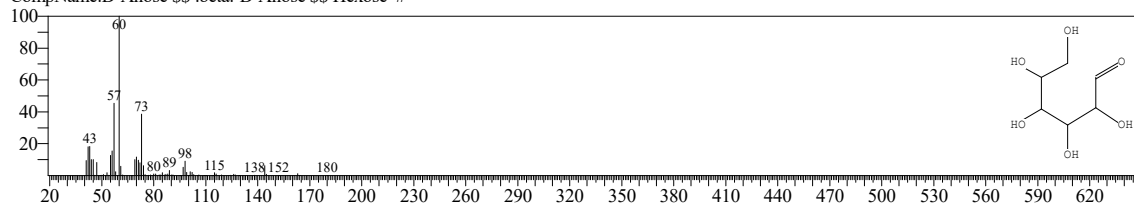

Hit#:2 Entry:13905 Library:NIST20R.lib

SI:94 Formula:C<sub>6</sub>H<sub>10</sub>O<sub>5</sub> CAS:498-07-7 MolWeight:162 RetIndex:1404

CompName:.beta.-D-Glucopyranose, 1,6-anhydro- \$\$ Anhydro-d-mannosan \$\$ Levoglucosan \$\$ 1,6-Anhydro-.beta.-D-glucopyranose \$\$ 1,6-Anhydro-beta-

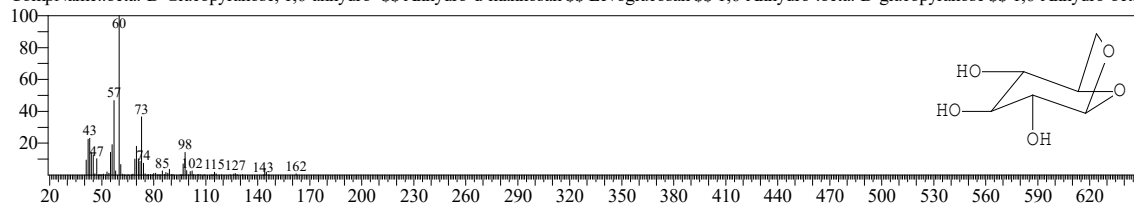

Hit#:3 Entry:23812 Library:NIST20M1.lib

SI:92 Formula:C<sub>6</sub>H<sub>10</sub>O<sub>5</sub> CAS:0-00-0 MolWeight:162 RetIndex:1404

CompName:1,6-Anhydro-.beta.-d-talopyranose

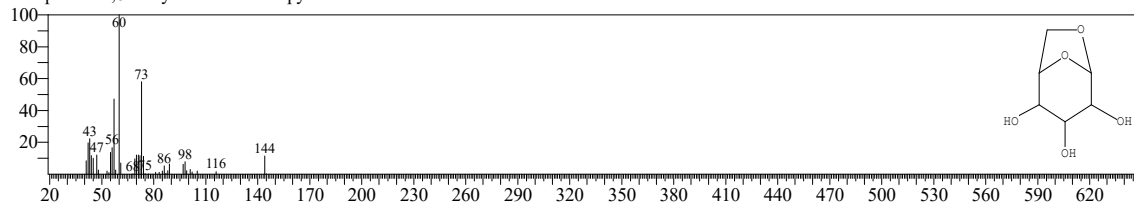

Hit#:4 Entry:23808 Library:NIST20M1.lib

SI:89 Formula:C<sub>6</sub>H<sub>10</sub>O<sub>5</sub> CAS:0-00-0 MolWeight:162 RetIndex:1400

CompName:3,4-Altrosan \$\$ 3,4-Anhydrohexopyranose #

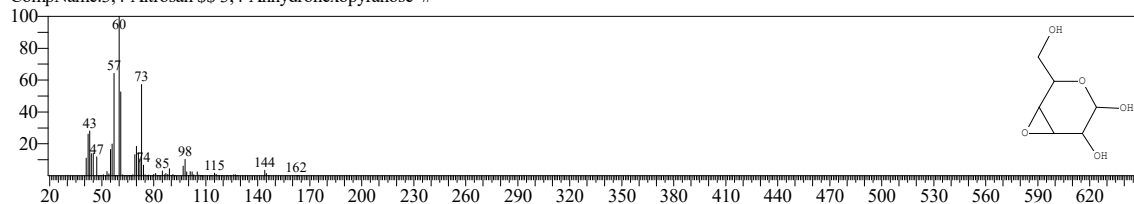

Hit#:5 Entry:21209 Library:NIST20R.lib

SI:85 Formula:C<sub>7</sub>H<sub>14</sub>O<sub>6</sub> CAS:97-30-3 MolWeight:194 RetIndex:1714

CompName:.alpha.-D-Glucopyranoside, methyl \$\$ Glucopyranoside, methyl, .alpha.-D- \$\$ .alpha.-Methylglucoside \$\$ Methyl .alpha.-D-glucopyranoside \$\$

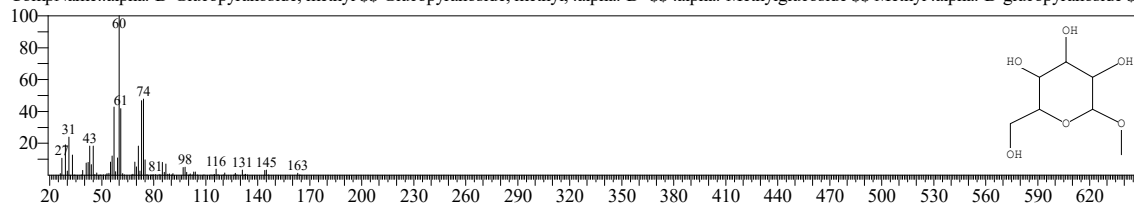

# TNAU

<< Target >>

Line#:11 R.Time:19.195(Scan#:2840) MassPeaks:401

RawMode:Averaged 19.190-19.200(2839-2841) BasePeak:263.15(4843)

BG Mode:Calc. from Peak Group 1 - Event 1 Q3 Scan

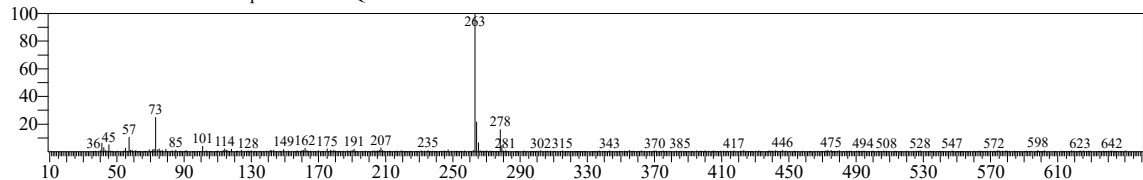

Hit#:1 Entry:33874 Library:NIST20R.lib

SI:86 Formula:C17H30OSi CAS:53925-65-8 MolWeight:278 RetIndex:1632

CompName:2,4-Di-tert-butylphenoxytrimethylsilane \$\$ Benzene, 2,4-bis(1,1-dimethylethyl)-1-[(trimethylsilyl)oxy]- \$\$ Silane, [2,4-bis(1,1-dimethylethyl)ph

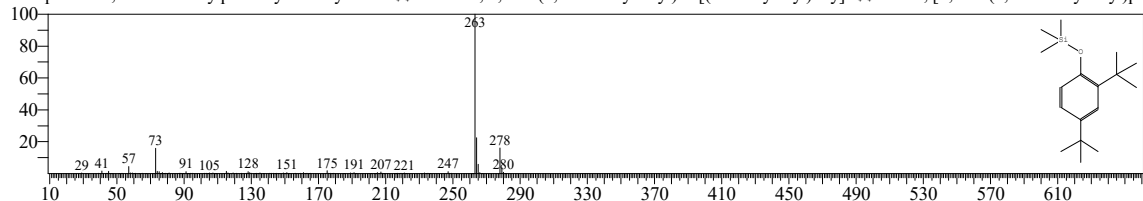

Hit#:2 Entry:136557 Library:NIST20M1.lib

SI:80 Formula:C12H22N4Si2 CAS:0-00-0 MolWeight:278 RetIndex:1703

CompName:3-Deazaadenine, 2TMS \$\$ 3-Deazaadenine, N,N'-bis-TMS \$\$ 1H-Imidazo[4,5-c]pyridin-4-amine, N,N'-bis-TMS

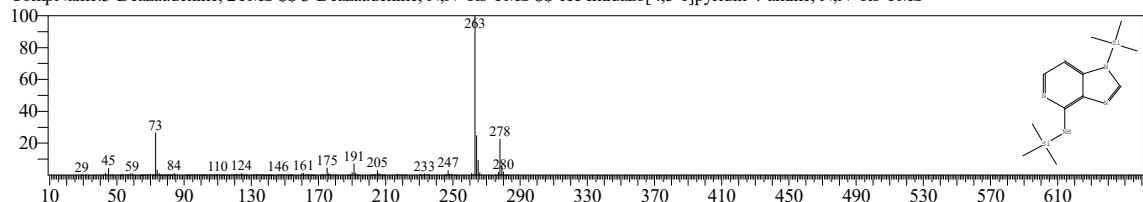

Hit#:3 Entry:33871 Library:NIST20R.lib

SI:79 Formula:C17H30OSi CAS:10416-73-6 MolWeight:278 RetIndex:1632

CompName:2,6-Bis(tert-butyl)phenol, TMS derivative \$\$ Trimethyl(2,6 di-tert-butylphenoxy)silane \$\$ (2,6-Di-tert-butylphenoxy)(trimethyl)silane #

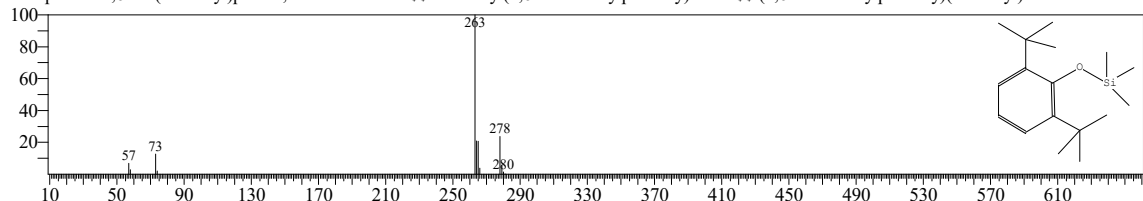

Hit#:4 Entry:137020 Library:NIST20M1.lib

SI:76 Formula:C15H22O3Si CAS:0-00-0 MolWeight:278 RetIndex:1736

CompName:6-Methoxy-2,2-dimethyl-2,3-dihydro-4H-chromen-4-one, TMS \$\$ 6-Methoxy-2,2-dimethyl-chroman-4-one, O-trimethylsilyl- \$\$ 4H-1-Benzopy

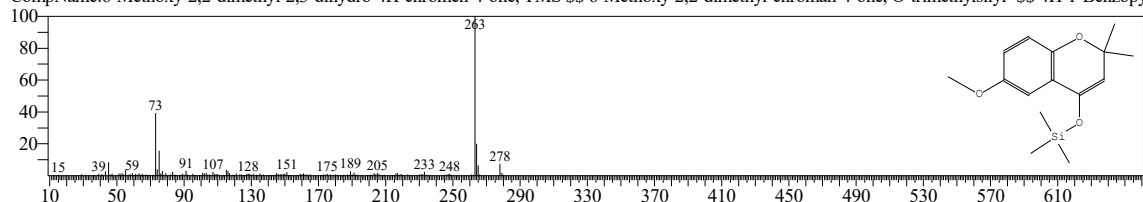

Hit#:5 Entry:136556 Library:NIST20M1.lib

SI:75 Formula:C12H22N4Si2 CAS:0-00-0 MolWeight:278 RetIndex:1606

CompName:1H,1'H-2,2'-Biimidazole, 2TMS \$\$ 1H,1'H-2,2'-Biimidazole, N,N'-bis-TMS \$\$ 1H,1'H-[2,2']Biimidazolyl, 2TMS \$\$ 2,2'-Bi-1H-imidazole, 2TMS

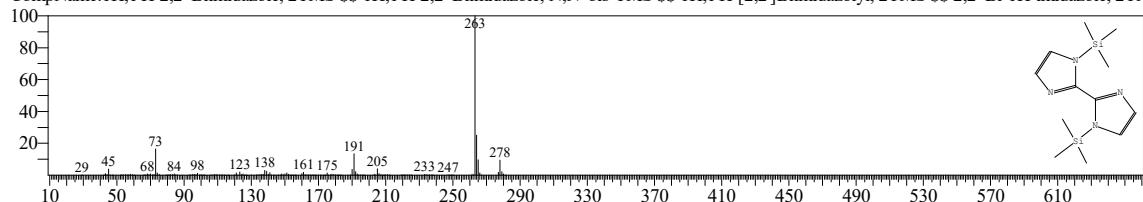

# TNAU

<< Target >>

Line#:12 R.Time:28.300(Scan#:4661) MassPeaks:408

RawMode:Averaged 28.295-28.305(4660-4662) BasePeak:73.05(8743)

BG Mode:Calc. from Peak Group 1 - Event 1 Q3 Scan

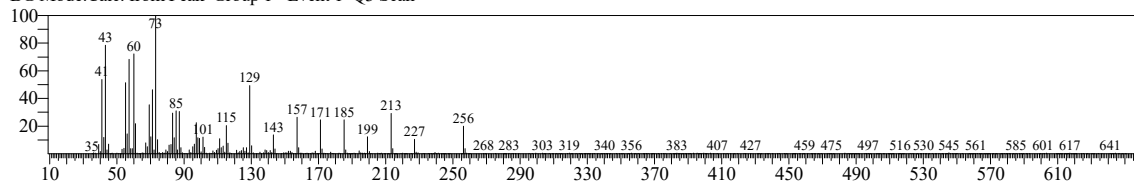

Hit#:1 Entry:31600 Library:NIST20R.lib

SI:95 Formula:C16H32O2 CAS:57-10-3 MolWeight:256 RetIndex:1968

CompName:n-Hexadecanoic acid \$\$ Hexadecanoic acid \$\$ n-Hexadecic acid \$\$ Palmitic acid \$\$ Pentadecanecarboxylic acid \$\$ 1-Pentadecanecarboxylic

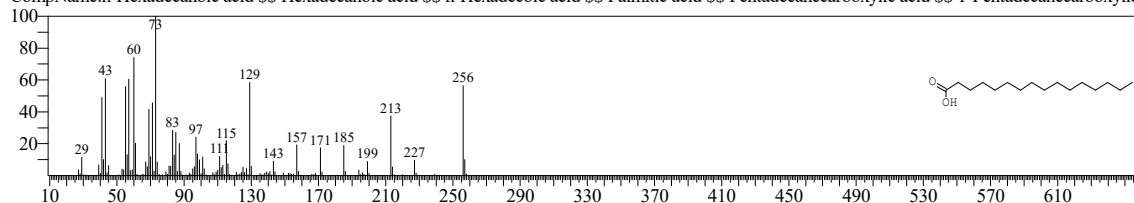

Hit#:2 Entry:29890 Library:NIST20R.lib

SI:92 Formula:C15H30O2 CAS:1002-84-2 MolWeight:242 RetIndex:1869

CompName:Pentadecanoic acid \$\$ Pentadecylic acid \$\$ n-Pentadecanoic acid \$\$ n-Pentadecylic acid

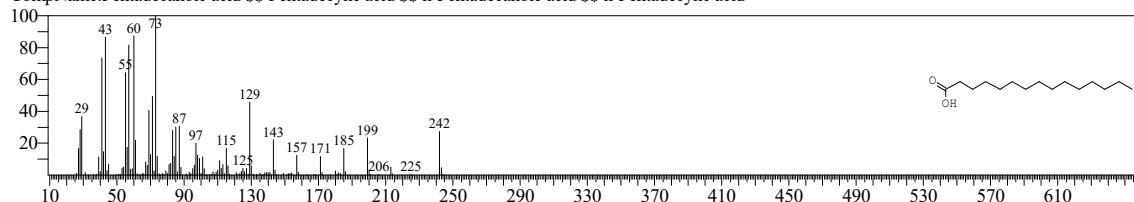

Hit#:3 Entry:44286 Library:NIST20M2.lib

SI:91 Formula:C38H68O8 CAS:28474-90-0 MolWeight:652 RetIndex:4765

CompName:l-(+)-Ascorbic acid 2,6-dihexadecanoate

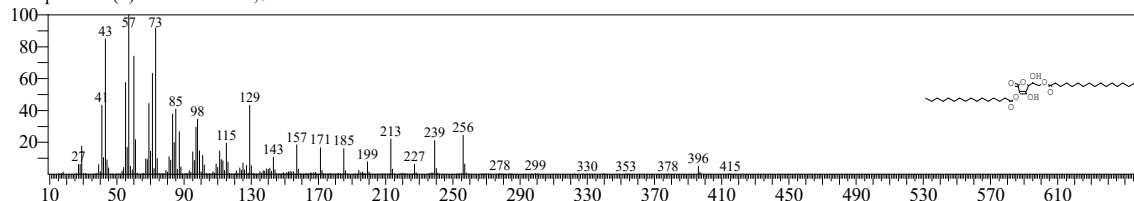

Hit#:4 Entry:144781 Library:NIST20M1.lib

SI:90 Formula:C18H36O2 CAS:57-11-4 MolWeight:284 RetIndex:2167

CompName:Octadecanoic acid \$\$ Stearic acid \$\$ n-Octadecanoic acid \$\$ Humko Industriene R \$\$ Hydrofol Acid 150 \$\$ Hystrene S-97 \$\$ Hystrene T-70 \$

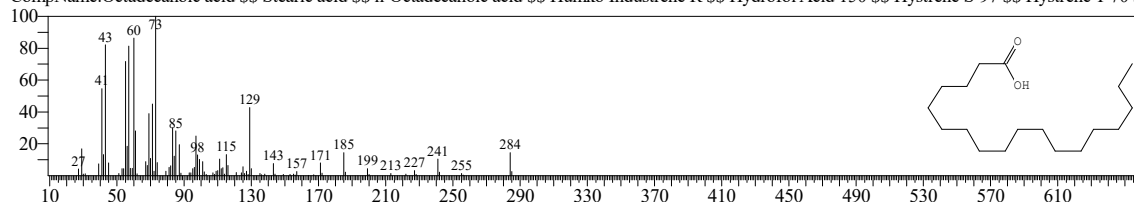

Hit#:5 Entry:25643 Library:NIST20R.lib

SI:90 Formula:C13H26O2 CAS:638-53-9 MolWeight:214 RetIndex:1670

CompName:Tridecanoic acid \$\$ n-Tridecanoic acid \$\$ n-Tridecoic acid \$\$ Tridecylic acid

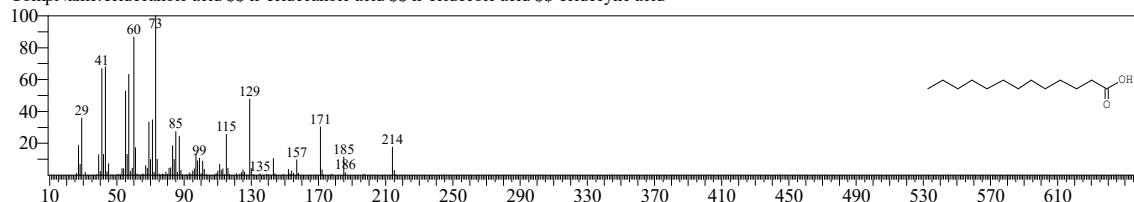

# TNAU

<< Target >>

Line#:13 R.Time:31.475(Scan#:5296) MassPeaks:389

RawMode:Averaged 31.470-31.480(5295-5297) BasePeak:67.05(6023)

BG Mode:Calc. from Peak Group 1 - Event 1 Q3 Scan

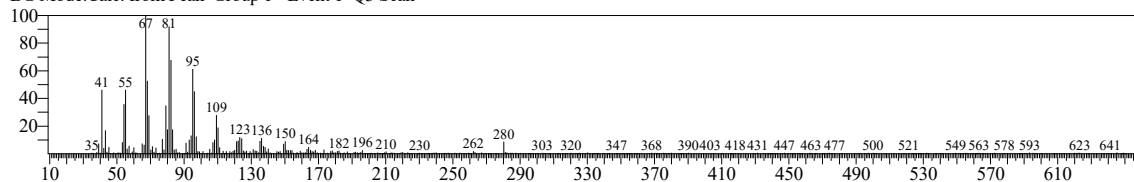

Hit#:1 Entry:34035 Library:NIST20R.lib

SI:95 Formula:C18H32O2 CAS:60-33-3 MolWeight:280 RetIndex:2183

CompName:9,12-Octadecadienoic acid (Z,Z)- \$\$ cis-9,cis-12-Octadecadienoic acid \$\$ cis,cis-Linoleic acid \$\$ Grape seed oil \$\$ Linoleic acid \$

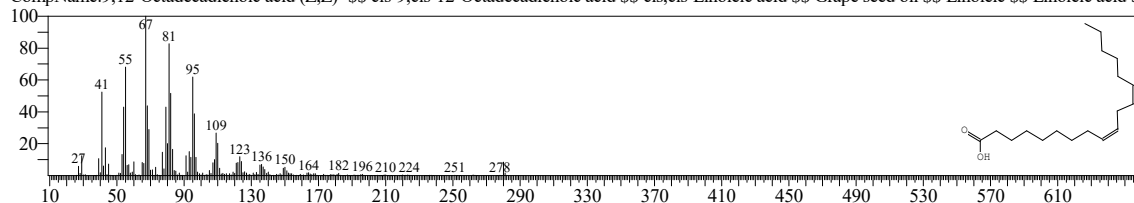

Hit#:2 Entry:139646 Library:NIST20M1.lib

SI:94 Formula:C18H32O2 CAS:2420-56-6 MolWeight:280 RetIndex:2183

CompName:10E,12Z-Octadecadienoic acid

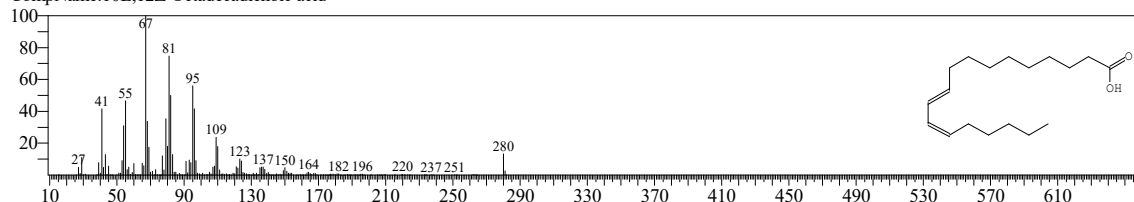

Hit#:3 Entry:139651 Library:NIST20M1.lib

SI:94 Formula:C18H32O2 CAS:544-71-8 MolWeight:280 RetIndex:2183

CompName:(9E,11E)-Octadecadienoic acid

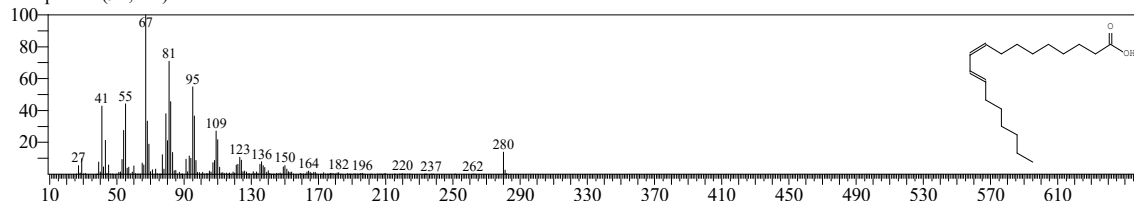

Hit#:4 Entry:173215 Library:NIST20M1.lib

SI:94 Formula:C20H36O2 CAS:2091-39-6 MolWeight:308 RetIndex:2382

CompName:11,14-Eicosadienoic acid

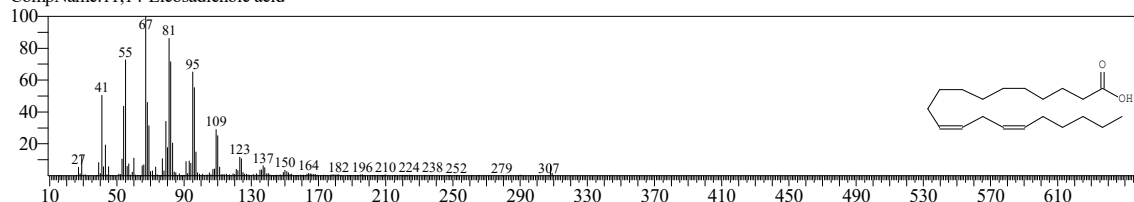

Hit#:5 Entry:139661 Library:NIST20M1.lib

SI:93 Formula:C18H32O2 CAS:506-21-8 MolWeight:280 RetIndex:2183

CompName:Linoelaidic acid

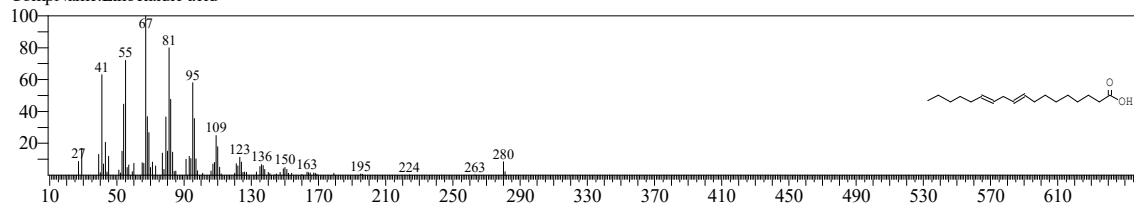

# TNAU

<< Target >>

Line#:14 R.Time:31.585(Scan#:5318) MassPeaks:330

RawMode:Averaged 31.580-31.590(5317-5319) BasePeak:55.05(2854)

BG Mode:Calc. from Peak Group 1 - Event 1 Q3 Scan

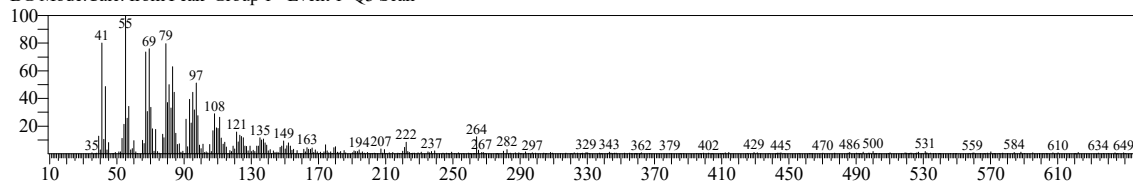

Hit#:1 Entry:63176 Library:NIST20M1.lib

SI:88 Formula:C14H26O CAS:65128-96-3 MolWeight:210 RetIndex:1609

CompName:7-Tetradecenal, (Z)- \$\$ Z-7-Tetradecenal \$\$ (7Z)-7-Tetradecenal #

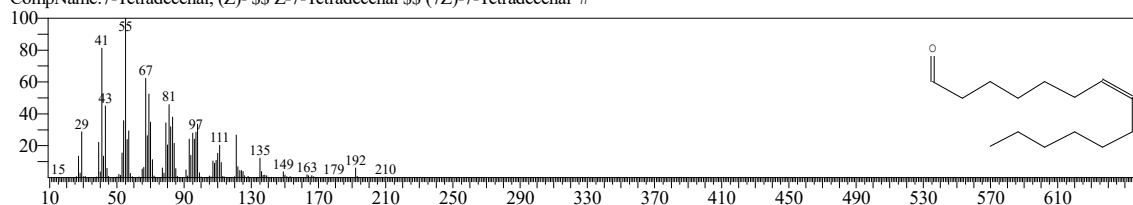

Hit#:2 Entry:92244 Library:NIST20M1.lib

SI:88 Formula:C16H30O CAS:56219-04-6 MolWeight:238 RetIndex:1808

CompName:cis-9-Hexadecenal \$\$ 9-Hexadecenal, (Z)- \$\$ (Z)-9-Hexadecenal \$\$ Z-9-Hexadecenal \$\$ (9Z)-9-Hexadecenal #

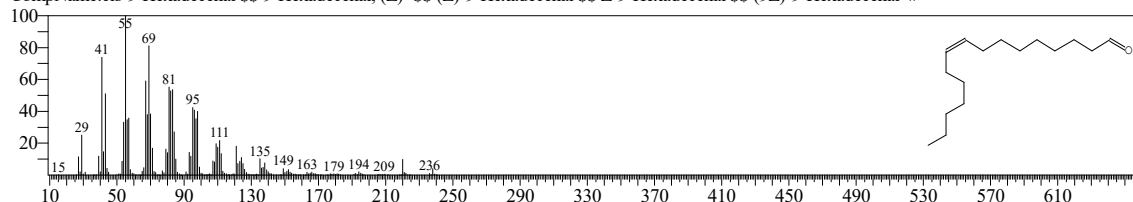

Hit#:3 Entry:205575 Library:NIST20M1.lib

SI:87 Formula:C22H40O2 CAS:69502-96-1 MolWeight:336 RetIndex:2453

CompName:2H-Pyran, 2-(2-heptadecyloxy)tetrahydro- \$\$ 2-(2-Heptadecyloxy)tetrahydro-2H-pyran #

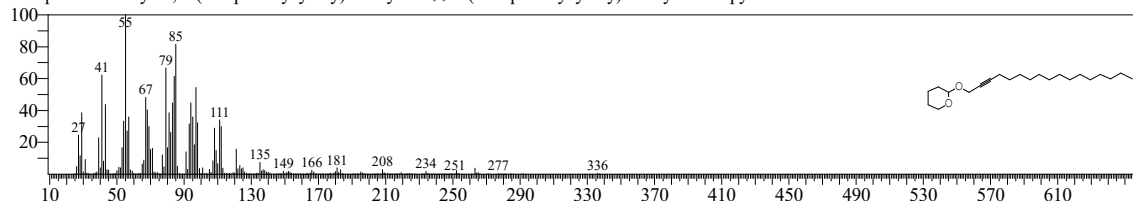

Hit#:4 Entry:123421 Library:NIST20M1.lib

SI:87 Formula:C18H34O CAS:2423-10-1 MolWeight:266 RetIndex:2007

CompName:9-Octadecenal, (Z)- \$\$ Olealdehyde \$\$ cis-9-Octadecenal \$\$ Oleylaldehyde \$\$ Z-9-Octadecenal \$\$ (9Z)-9-Octadecenal #

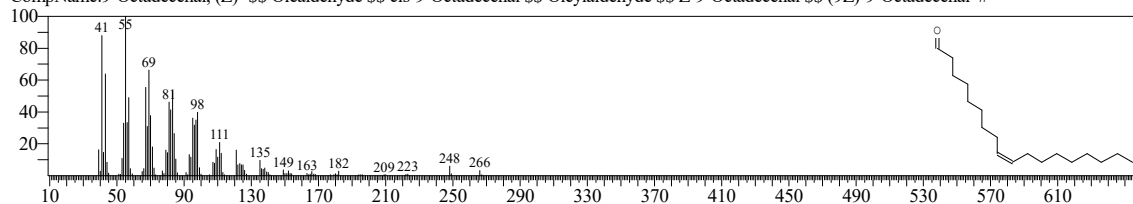

Hit#:5 Entry:156549 Library:NIST20M1.lib

SI:87 Formula:C19H34O2 CAS:0-00-0 MolWeight:294 RetIndex:2241

CompName:E,E,Z-1,3,12-Nonadecatriene-5,14-diol \$\$ (3E,12Z)-1,3,12-Nonadecatriene-5,14-diol #

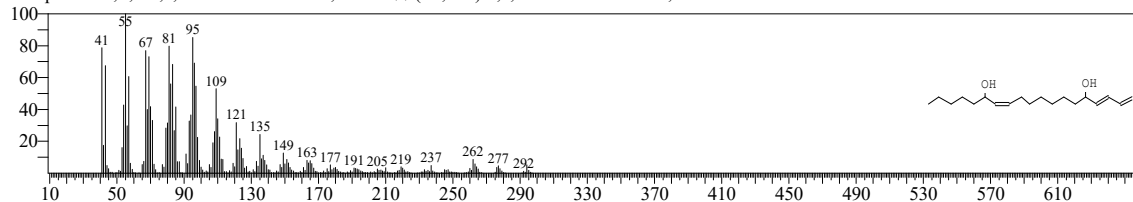

# TNAU

<< Target >>

Line#:15 R.Time:32.030(Scan#:5407) MassPeaks:421

RawMode:Averaged 32.025-32.035(5406-5408) BasePeak:73.05(1933)

BG Mode:Calc. from Peak Group 1 - Event 1 Q3 Scan

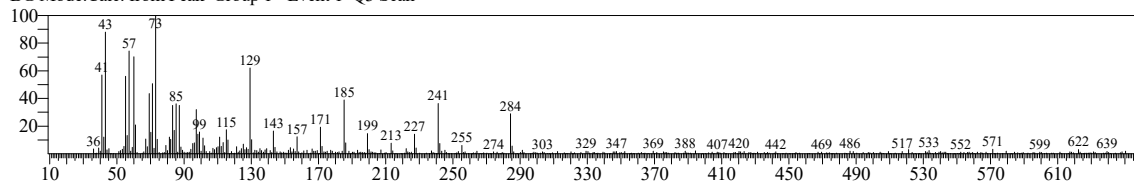

Hit#:1 Entry:34463 Library:NIST20R.lib

SI:92 Formula:C18H36O2 CAS:57-11-4 MolWeight:284 RetIndex:2167

CompName:Octadecanoic acid \$\$ Stearic acid \$\$ n-Octadecanoic acid \$\$ Humko Industrane R \$\$ Hydrofol Acid 150 \$\$ Hystrene S-97 \$\$ Hystrene T-70 \$

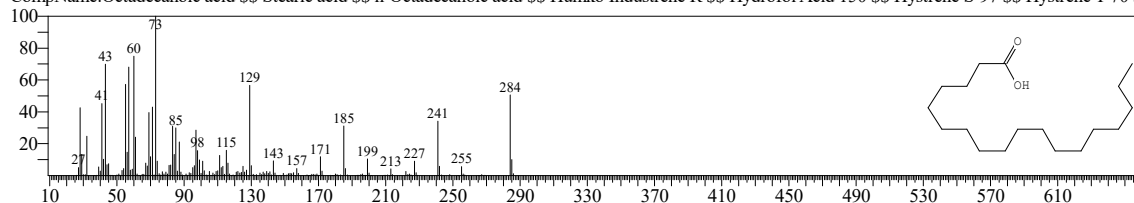

Hit#:2 Entry:29890 Library:NIST20R.lib

SI:89 Formula:C15H30O2 CAS:1002-84-2 MolWeight:242 RetIndex:1869

CompName:Pentadecanoic acid \$\$ Pentadecylic acid \$\$ n-Pentadecanoic acid \$\$ n-Pentadecylic acid



Hit#:3 Entry:44286 Library:NIST20M2.lib

SI:87 Formula:C38H68O8 CAS:28474-90-0 MolWeight:652 RetIndex:4765

CompName:l-(+)-Ascorbic acid 2,6-dihexadecanoate

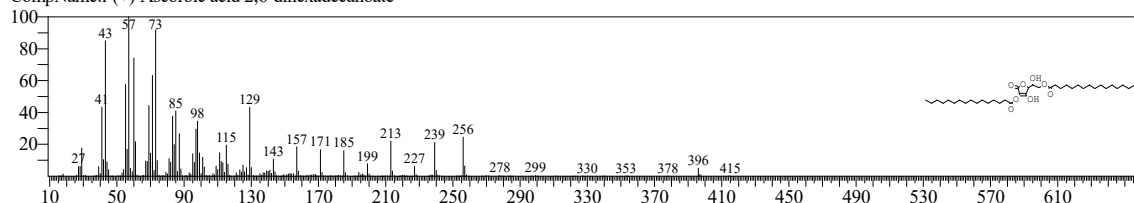

Hit#:4 Entry:31600 Library:NIST20R.lib

SI:87 Formula:C16H32O2 CAS:57-10-3 MolWeight:256 RetIndex:1968

CompName:n-Hexadecanoic acid \$\$ Hexadecanoic acid \$\$ n-Hexadecanoic acid \$\$ Palmitic acid \$\$ Pentadecanecarboxylic acid \$\$ 1-Pentadecanecarboxylic

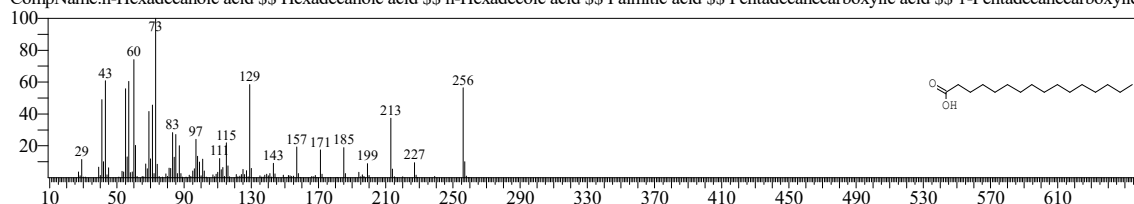

Hit#:5 Entry:178153 Library:NIST20M1.lib

SI:86 Formula:C20H40O2 CAS:506-30-9 MolWeight:312 RetIndex:2366

CompName:Eicosanoic acid \$\$ Arachic acid \$\$ Arachidic acid \$\$ Icosanoic acid \$\$ n-Eicosanoic acid \$\$ Arachidic acid (synthetic)

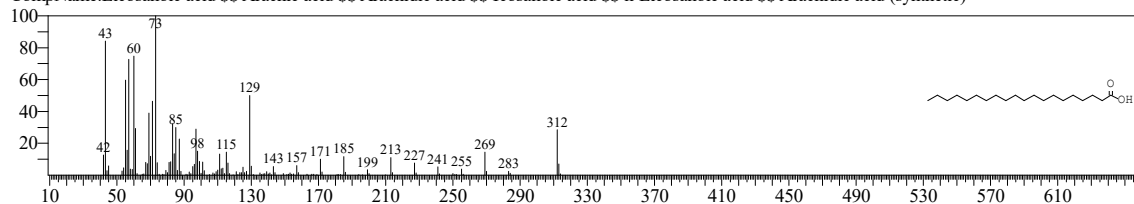



# TNAU

<< Target >>

Line#:16 R.Time:39.895(Scan#:6980) MassPeaks:346

RawMode:Averaged 39.890-39.900(6979-6981) BasePeak:149.00(1950)

BG Mode:Calc. from Peak Group 1 - Event 1 Q3 Scan

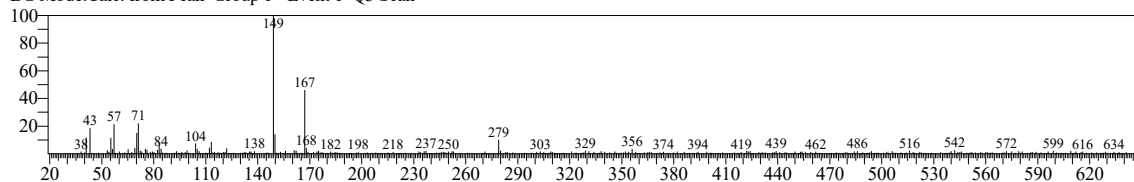

Hit#:1 Entry:41263 Library:NIST20R.lib

SI:87 Formula:C24H38O4 CAS:117-81-7 MolWeight:390 RetIndex:2704

CompName:Bis(2-ethylhexyl) phthalate \$\$ Phthalic acid, bis(2-ethylhexyl) ester \$\$ Bis(2-ethylhexyl) 1,2-benzenedicarboxylate \$\$ Bisoflex 81 \$\$ Compound

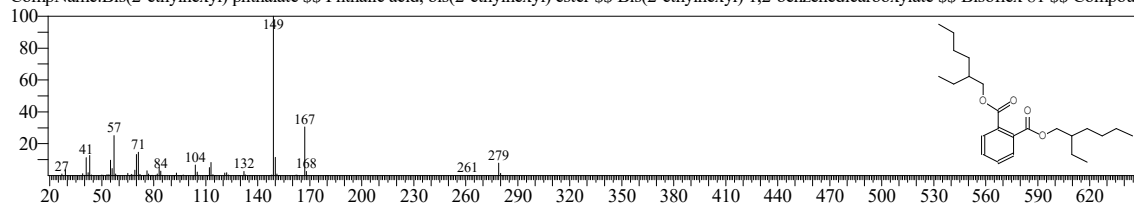

Hit#:2 Entry:254360 Library:NIST20M1.lib

SI:83 Formula:C24H38O4 CAS:0-00-0 MolWeight:390 RetIndex:2575

CompName:Phthalic acid, di(6-methylhept-2-yl) ester

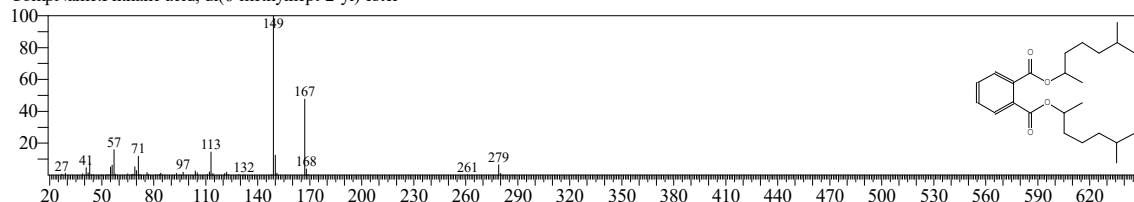

Hit#:3 Entry:254434 Library:NIST20M1.lib

SI:83 Formula:C24H38O4 CAS:0-00-0 MolWeight:390 RetIndex:2704

CompName:Phthalic acid, di(2-propylpentyl) ester

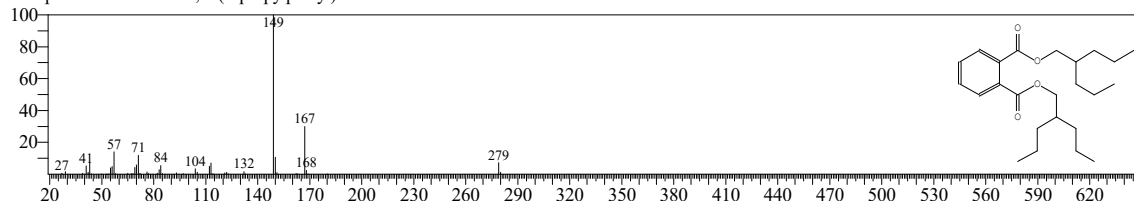

Hit#:4 Entry:10247 Library:NIST20M2.lib

SI:83 Formula:C26H42O4 CAS:0-00-0 MolWeight:418 RetIndex:2838

CompName:Phthalic acid, 6-ethyloct-3-yl 2-ethylhexyl ester

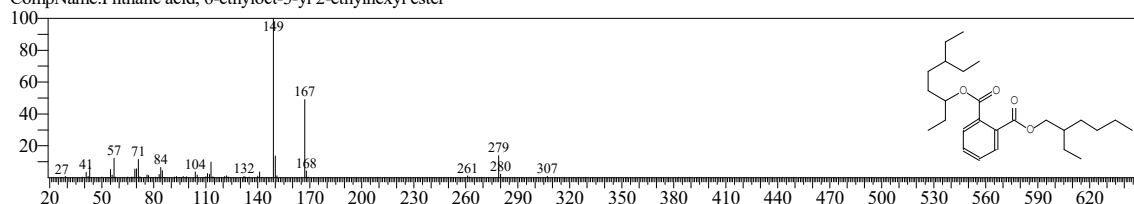

Hit#:5 Entry:218672 Library:NIST20M1.lib

SI:80 Formula:C21H32O4 CAS:0-00-0 MolWeight:348 RetIndex:2385

CompName:Phthalic acid, 2-ethylhexyl neopentyl ester

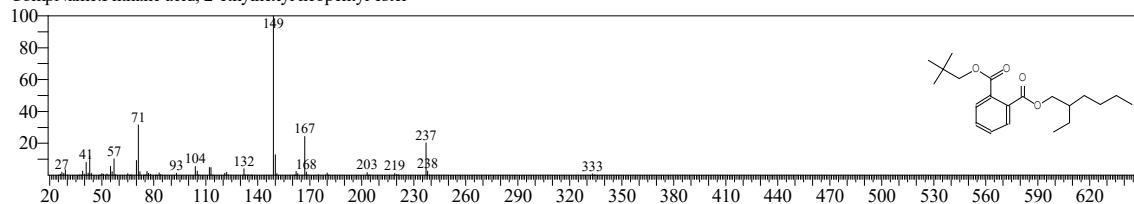

# TNAU

<< Target >>

Line#:17 R.Time:45.585(Scan#:8118) MassPeaks:419

RawMode:Averaged 45.580-45.590(8117-8119) BasePeak:139.10(1783)

BG Mode:Calc. from Peak Group 1 - Event 1 Q3 Scan

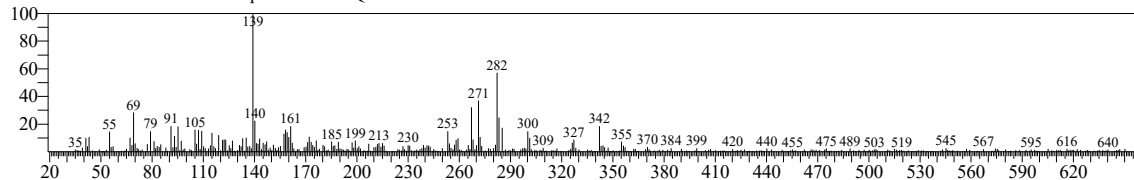

Hit#:1 Entry:8297 Library:NIST20M2.lib

SI:81 Formula:C27H42O3 CAS:512-04-9 MolWeight:414 RetIndex:2844

CompName:Diosgenin \$\$ Spirost-5-en-3-ol, (3.beta.,25R)- \$\$ Spirost-5-en-3.beta.-ol, (25R)- \$\$ Nitrogenin \$\$ 25D-spirost-5-en-3.beta.-ol \$\$ Spiro(8H-nap

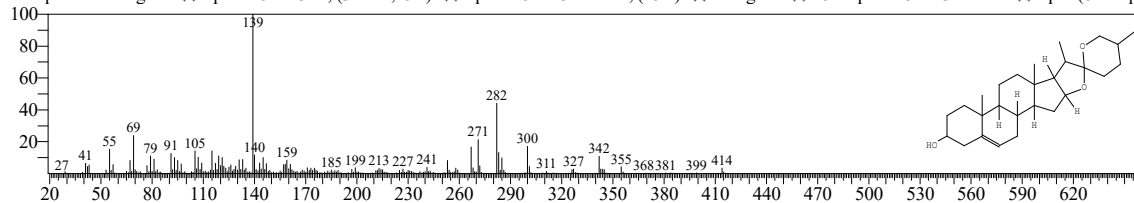

Hit#:2 Entry:14852 Library:NIST20M2.lib

SI:73 Formula:C28H44O3 CAS:116292-24-1 MolWeight:428 RetIndex:2793

CompName:Diosgenin methyl ether \$\$ Diosgenin Me derivative \$\$ (3.beta.,25R)-3-Methoxyspirost-5-ene \$\$ Spirost-5-ene, 3-methoxy-, (3.beta.,25R)-

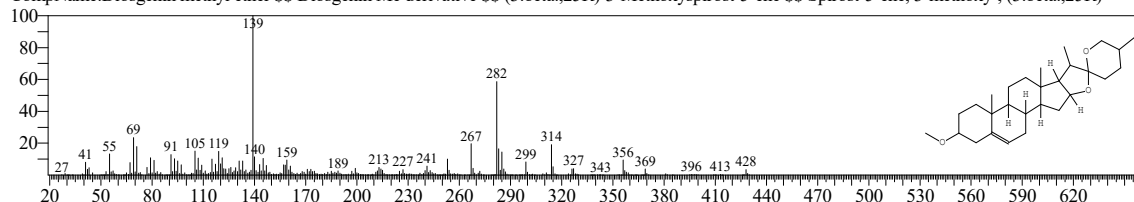

Hit#:3 Entry:41561 Library:NIST20R.lib

SI:71 Formula:C27H42O2 CAS:32277-73-9 MolWeight:398 RetIndex:2713

CompName:Des-N-solasodine \$\$ Furosta-5,20(22)-dien-3-ol #

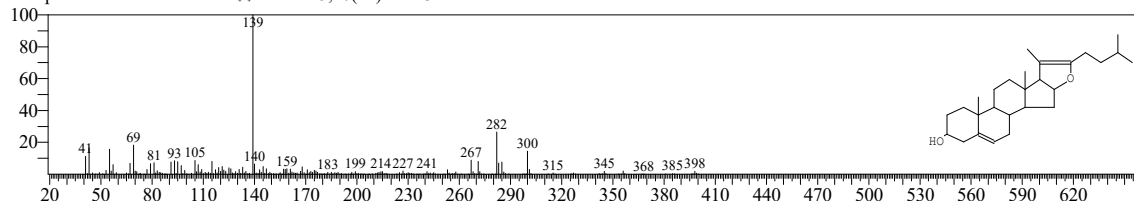

Hit#:4 Entry:38 Library:FA\_ME\_SP2560\_EI\_V3.lib

SI:38 Formula:C23H34O2 CAS:6217-54-5 MolWeight:342 RetIndex:3514

CompName:Methyl cis-4,7,10,13,16,19-Docosahexaenoate ; Docosa-4,7,10,13,16,19-hexaenoic acid

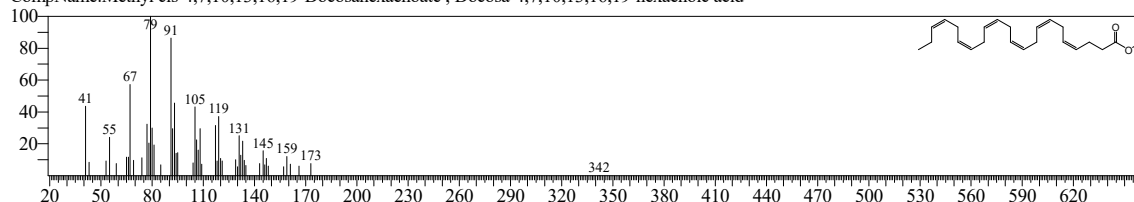

Hit#:5 Entry:25 Library:FA\_ME\_SP2560\_EI\_V3.lib

SI:38 Formula:C19H32O2 CAS:463-40-1 MolWeight:292 RetIndex:2892

CompName:Methyl linolenate ; (9Z,12Z,15Z)-octadeca-9,12,15-trienoic acid

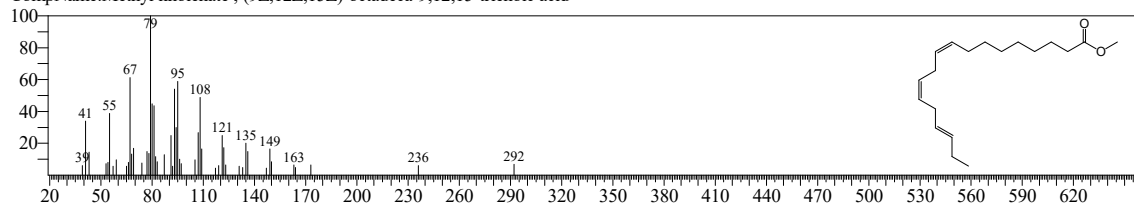

# TNAU

<< Target >>

Line#:18 R.Time:45.620(Scan#:8125) MassPeaks:365

RawMode:Averaged 45.615-45.625(8124-8126) BasePeak:282.20(450)

BG Mode:Calc. from Peak Group 1 - Event 1 Q3 Scan

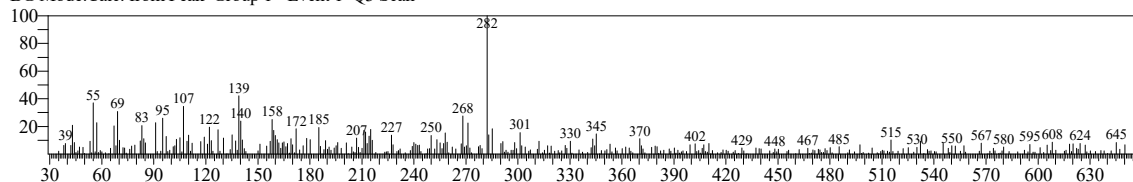

Hit#:1 Entry:15 Library:FA\_ME\_SP2560\_EI\_V3.lib

SI:34 Formula:C18H34O2 CAS:29743-97-3 MolWeight:282 RetIndex:2581

CompName:Methyl cis-10-heptadecenoate ; Heptadec-10-enoic acid

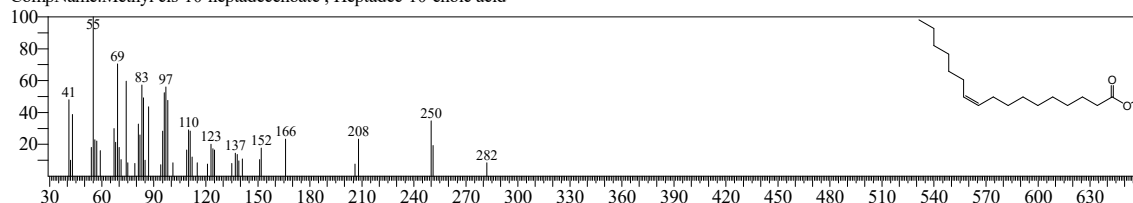

Hit#:2 Entry:24 Library:FA\_ME\_SP2560\_EI\_V3.lib

SI:32 Formula:C21H40O2 CAS:5561-99-9 MolWeight:324 RetIndex:2874

CompName:Methyl cis-11-icosenoate ; Icos-11-enoic acid

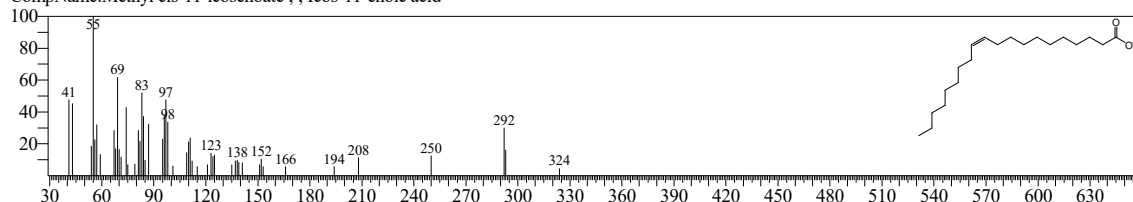

Hit#:3 Entry:11 Library:FA\_ME\_SP2560\_EI\_V3.lib

SI:32 Formula:C16H30O2 CAS:84743-29-3 MolWeight:254 RetIndex:2388

CompName:Methyl cis-10-pentadecenoate ; (Z)-pentadec-10-enoic acid

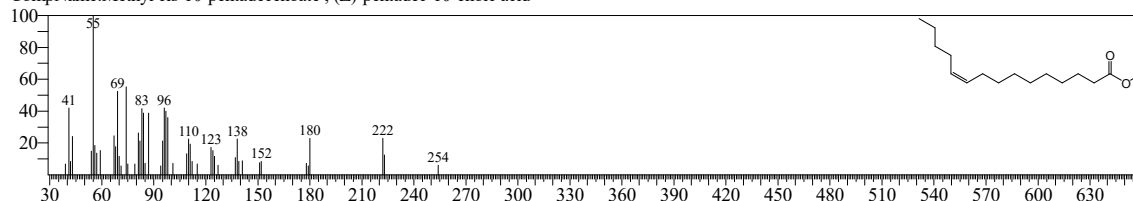

Hit#:4 Entry:37 Library:FA\_ME\_SP2560\_EI\_V3.lib

SI:31 Formula:C25H48O2 CAS:506-37-6 MolWeight:380 RetIndex:3263

CompName:Methyl nervonate ; Tetracos-15-enoic acid

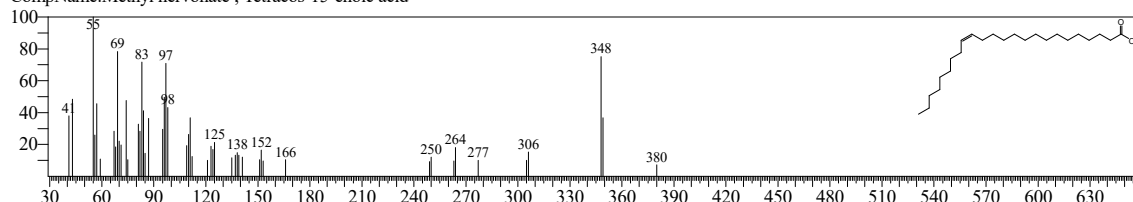

Hit#:5 Entry:34 Library:FA\_ME\_SP2560\_EI\_V3.lib

SI:30 Formula:C23H42O2 CAS:7370-49-2 MolWeight:350 RetIndex:3169

CompName:Methyl cis-13,16-Docosadienate ; (13Z,16E)-docosa-13,16-dienoic acid

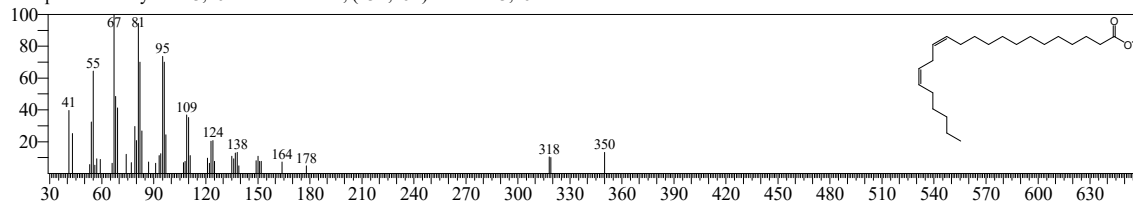

Supplement: Supplementary file 14 [file supplementary]
