# Supplementary material for: Comparative Metabolomics Profiling Reveals Key Metabolites and Associated Pathways Regulating Tuber Dormancy in White Yam (<em>Dioscorea rotundata</em>)
Source: Preprints.org preprint supplement (doi:10.20944/preprints202303.0378.v1), 2023-03-21

# TNAU

## Sample Information

Analyzed by : Admin  
 Analyzed : 02-Sep-22 6:12:25 PM  
 Sample Type : Unknown  
 Level # : 1  
 Sample Name : Sample  
 Sample ID : 10-1  
 IS Amount : [1]=1  
 Sample Amount : 1  
 Dilution Factor : 1  
 Vial # : 11  
 Injection Volume : 5.00  
 Data File : D:\GCMS-8040NX\Sep 2022\Users\01.09.2022\01092022029.qgd  
 Org Data File : D:\GCMS-8040NX\Sep 2022\Users\01.09.2022\01092022029.qgd  
 Method File : D:\GCMS-8040NX\Sep 2022\Method\Scan\_methodfile.qgm  
 Org Method File : D:\GCMS-8040NX\Sep 2022\Method\Scan\_methodfile.qgm  
 Report File :  
 Tuning File : D:\GCMS-8040NX\Aug 2022\Tuning Data\TUNING 25082022.qgt  
 Modified by : Admin  
 Modified : 05-Sep-22 11:09:36 AM

Chromatogram Sample D:\GCMS-8040NX\Sep 2022\Users\01.09.2022\01092022029.qgd

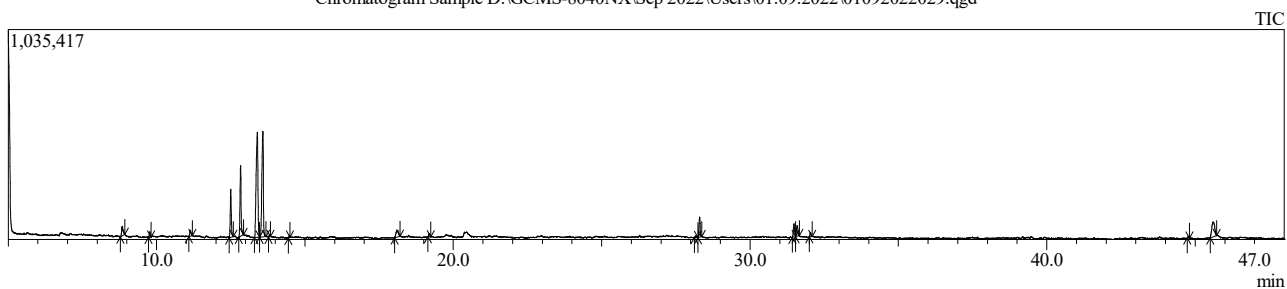

Peak Report TIC

| Peak# | R.Time | Area    | Area%  | Height  | Height% | A/H  | Similarity | Name                                    |
|-------|--------|---------|--------|---------|---------|------|------------|-----------------------------------------|
| 1     | 8.842  | 180573  | 2.45   | 48568   | 2.28    | 3.72 | 87         | 1-Butanol, 3-methyl-, acetate           |
| 2     | 9.771  | 56146   | 0.76   | 25956   | 1.22    | 2.16 | 95         | Pentasiloxane, dodecamethyl-            |
| 3     | 11.140 | 89458   | 1.22   | 29510   | 1.38    | 3.03 | 42         | Methyl myristoleate                     |
| 4     | 12.499 | 599961  | 8.15   | 238022  | 11.16   | 2.52 | 74         | 1,3-Benzodioxol-5-ol                    |
| 5     | 12.830 | 901587  | 12.25  | 351165  | 16.47   | 2.57 | 74         | 1,3-Benzodioxol-5-ol                    |
| 6     | 13.396 | 2164250 | 29.41  | 519795  | 24.38   | 4.16 | 53         | Methyl cis-13,16-Docosadienate          |
| 7     | 13.581 | 1825011 | 24.80  | 523466  | 24.55   | 3.49 | 53         | Methyl cis-13,16-Docosadienate          |
| 8     | 13.813 | 23001   | 0.31   | 10534   | 0.49    | 2.18 | 73         | Trisiloxane, octamethyl-                |
| 9     | 14.478 | 15790   | 0.21   | 7445    | 0.35    | 2.12 | 74         | 2,3-Dimethyl-para-anisaldehyde          |
| 10    | 18.122 | 195033  | 2.65   | 32899   | 1.54    | 5.93 | 95         | D-Allose                                |
| 11    | 19.193 | 40684   | 0.55   | 15716   | 0.74    | 2.59 | 84         | 2,4-Di-tert-butylphenoxytrimethylsilane |
| 12    | 28.160 | 28208   | 0.38   | 7808    | 0.37    | 3.61 | 87         | Dibutyl phthalate                       |
| 13    | 28.300 | 273041  | 3.71   | 98604   | 4.62    | 2.77 | 95         | n-Hexadecanoic acid                     |
| 14    | 31.479 | 198737  | 2.70   | 65922   | 3.09    | 3.01 | 95         | 10E,12Z-Octadecadienoic acid            |
| 15    | 31.587 | 179229  | 2.44   | 52284   | 2.45    | 3.43 | 88         | 7-Tetradecenal, (Z)-                    |
| 16    | 32.036 | 55579   | 0.76   | 21436   | 1.01    | 2.59 | 91         | Octadecanoic acid                       |
| 17    | 44.771 | 22871   | 0.31   | 8830    | 0.41    | 2.59 | 90         | Squalene                                |
| 18    | 45.605 | 509505  | 6.92   | 74199   | 3.48    | 6.87 | 90         | Diosgenin                               |
|       |        | 7358664 | 100.00 | 2132159 | 100.00  |      |            |                                         |

Library

# TNAU

<< Target >>

Line#:1 R.Time:8.840(Scan#:769) MassPeaks:367

RawMode:Averaged 8.835-8.845(768-770) BasePeak:43.05(10191)

BG Mode:Calc. from Peak Group 1 - Event 1 Q3 Scan

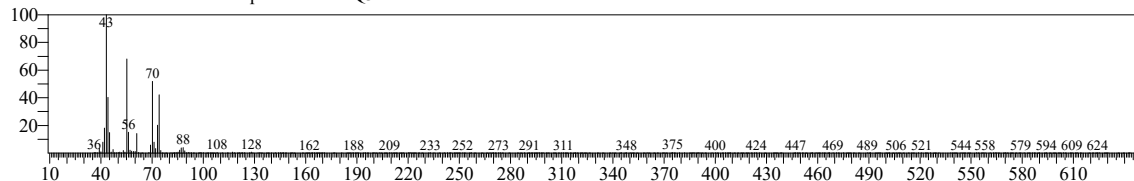

Hit#:1 Entry:6784 Library:NIST20R.lib

SI:87 Formula:C7H14O2 CAS:123-92-2 MolWeight:130 RetIndex:820

CompName:1-Butanol, 3-methyl-, acetate \$\$ Isopentyl alcohol, acetate \$\$ Acetic acid, 3-methylbutyl ester \$\$ Banana oil \$\$ Isoamyl acetate \$\$ Isoamyl etha

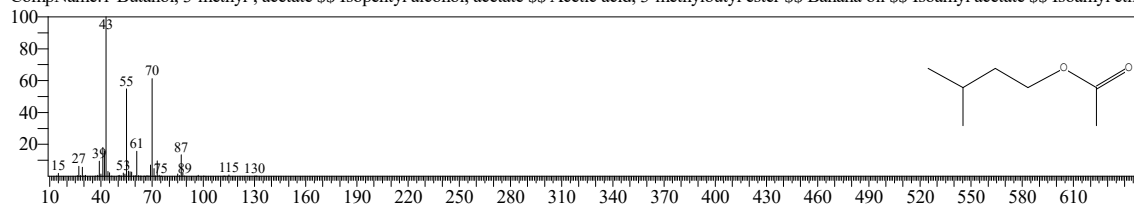

Hit#:2 Entry:8685 Library:NIST20M1.lib

SI:84 Formula:C7H14O2 CAS:628-63-7 MolWeight:130 RetIndex:884

CompName:Acetic acid, pentyl ester \$\$ n-Amyl acetate \$\$ n-Pentyl acetate \$\$ Amyl acetate \$\$ Birnenool \$\$ Pentyl acetate \$\$ Acetic acid, amyl ester \$\$ An

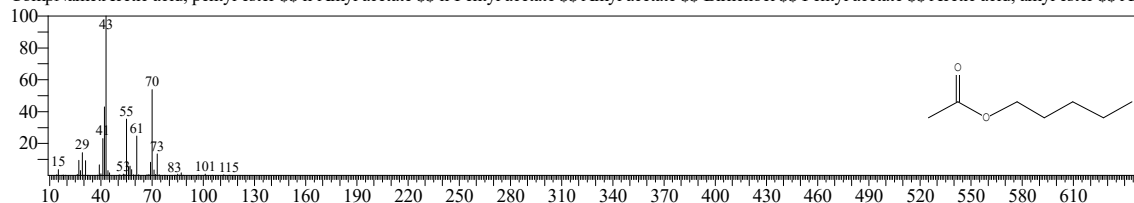

Hit#:3 Entry:6819 Library:NIST20R.lib

SI:84 Formula:C7H14O2 CAS:624-41-9 MolWeight:130 RetIndex:820

CompName:1-Butanol, 2-methyl-, acetate \$\$ 2-Methyl-1-butyl acetate \$\$ 2-Methylbutyl acetate \$\$ Acetic acid 2-methylbutyl ester \$\$ 2-Methylbutyl acetate \$

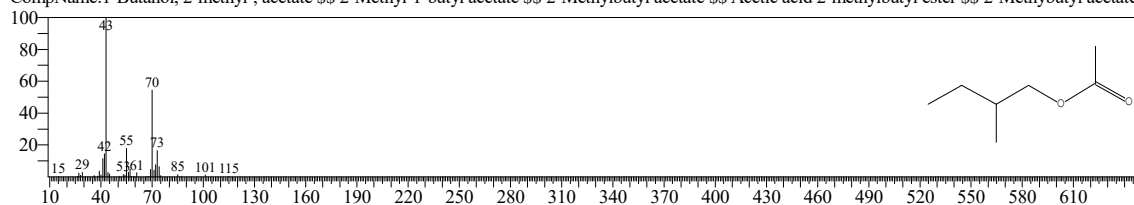

Hit#:4 Entry:1220 Library:NIST20R.lib

SI:82 Formula:C4H8O2 CAS:590-90-9 MolWeight:88 RetIndex:798

CompName:CH3C(O)CH2CH2OH \$\$ Methylolacetone \$\$ Monomethylolacetone \$\$ 3-Ketobutan-1-ol \$\$ 3-Oxo-1-butanol \$\$ 3-Oxobutanol \$\$ 4-Butanol-

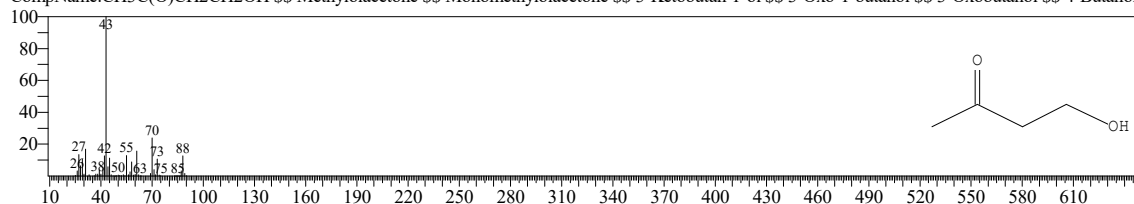

Hit#:5 Entry:8539 Library:NIST20M1.lib

SI:81 Formula:C6H10O3 CAS:6628-79-1 MolWeight:130 RetIndex:1046

CompName:Pentanoic acid, 3-methyl-4-oxo- \$\$ 3-Methyl-4-oxopentanoic acid \$\$ Levulinic acid, 3-methyl \$\$ 3-Methyllevulinic acid

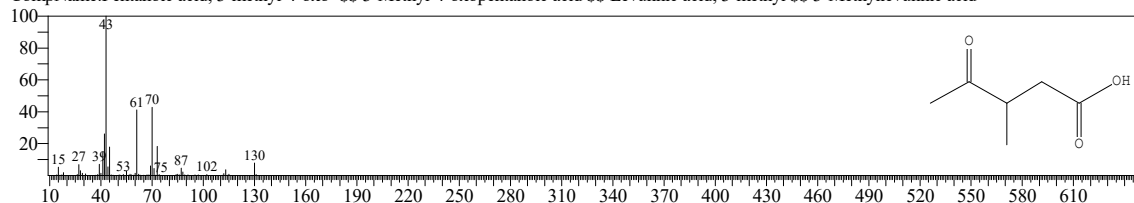

# TNAU

<< Target >>

Line#:2 R.Time:9.770(Scan#:955) MassPeaks:361

RawMode:Averaged 9.765-9.775(954-956) BasePeak:281.05(5686)

BG Mode:Calc. from Peak Group 1 - Event 1 Q3 Scan

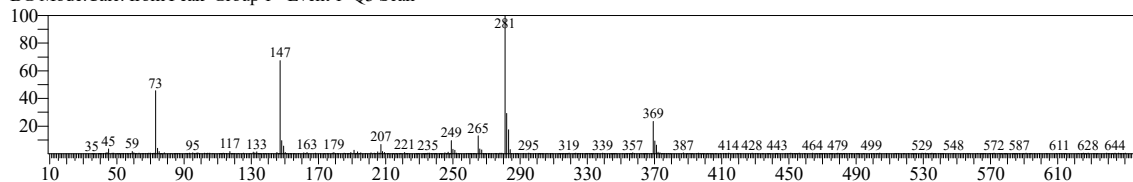

Hit#:1 Entry:40975 Library:NIST20R.lib

SI:95 Formula:C<sub>12</sub>H<sub>36</sub>O<sub>4</sub>Si<sub>5</sub> CAS:141-63-9 MolWeight:384 RetIndex:1068

CompName:Pentasiloxane, dodecamethyl- \$\$ Dodecamethylpentasiloxane \$\$ 1,1,1,3,3,5,5,7,7,9,9-Dodecamethylpentasiloxane #

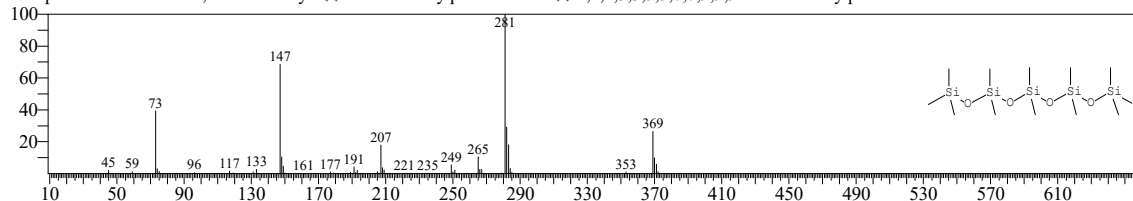

Hit#:2 Entry:249272 Library:NIST20M1.lib

SI:84 Formula:C<sub>12</sub>H<sub>36</sub>O<sub>4</sub>Si<sub>5</sub> CAS:3555-47-3 MolWeight:384 RetIndex:1068

CompName:Trisiloxane, 1,1,1,5,5,5-hexamethyl-3,3-bis[(trimethylsilyl)oxy]- \$\$ Tetrakis(trimethylsiloxy)silane \$\$ Trisiloxane, 1,1,1,5,5,5-hexamethyl-3,3-b

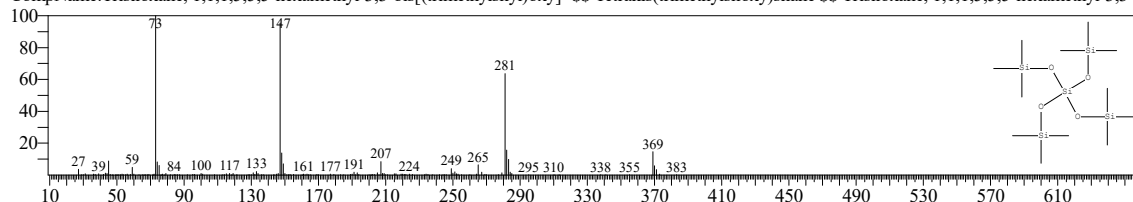

Hit#:3 Entry:27848 Library:NIST20M2.lib

SI:82 Formula:C<sub>18</sub>H<sub>48</sub>O<sub>4</sub>Si<sub>5</sub> CAS:0-00-0 MolWeight:468 RetIndex:1495

CompName:1,3,5,7,9-Pentasiloxane, 1,1,3,3,5,5,7,7,9,9-decamethyl-1,9-di(tert.butyl)-

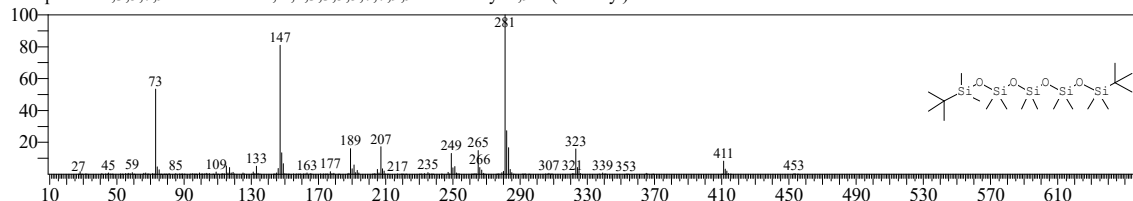

Hit#:4 Entry:249271 Library:NIST20M1.lib

SI:80 Formula:C<sub>12</sub>H<sub>36</sub>O<sub>4</sub>Si<sub>5</sub> CAS:38146-99-5 MolWeight:384 RetIndex:1068

CompName:1,1,1,3,5,5,7,7-Nonamethyl-3-(trimethylsiloxy)tetrasiloxane \$\$ 1,1,1,3,3,5,5,7,7-Nonamethyl-5-[(trimethylsilyl)oxy]tetrasiloxane #

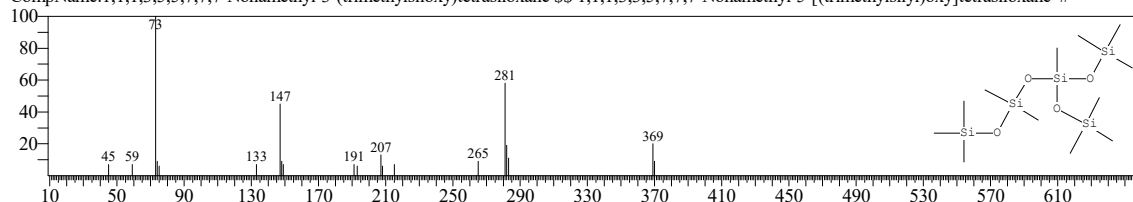

Hit#:5 Entry:158097 Library:NIST20M1.lib

SI:78 Formula:C<sub>14</sub>H<sub>24</sub>O<sub>3</sub>Si<sub>2</sub> CAS:0-00-0 MolWeight:296 RetIndex:1625

CompName:2,6-Dihydroxyacetophenone, 2TMS derivative \$\$ 2',6'-Dihydroxyacetophenone, bis(trimethylsilyl) ether

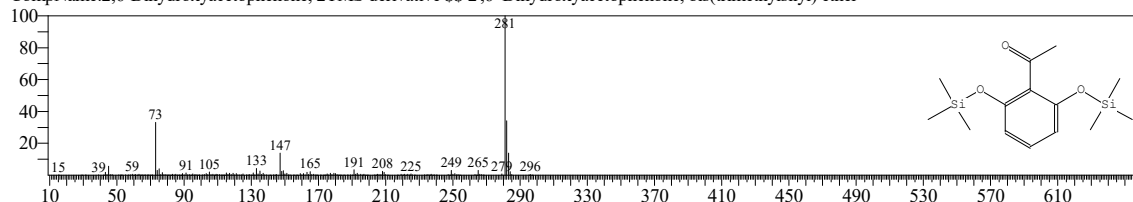

# TNAU

<< Target >>

Line#:3 R.Time:11.140(Scan#:1229) MassPeaks:367

RawMode:Averaged 11.135-11.145(1228-1230) BasePeak:69.05(3791)

BG Mode:Calc. from Peak Group 1 - Event 1 Q3 Scan

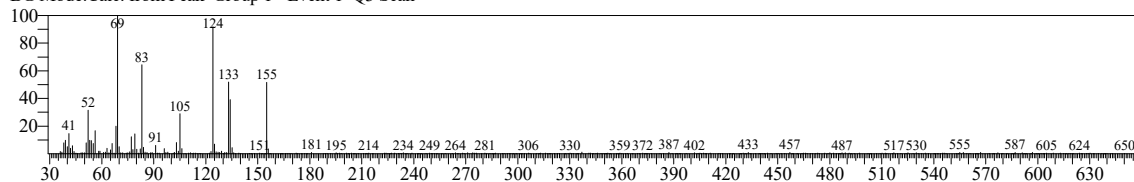

Hit#:1 Entry:9 Library:FA\_ME\_SP2560\_EI\_V3.lib

SI:42 Formula:C15H28O2 CAS:544-64-9 MolWeight:240 RetIndex:2283

CompName:Methyl myristoleate ; (Z)-tetradec-9-enoic acid

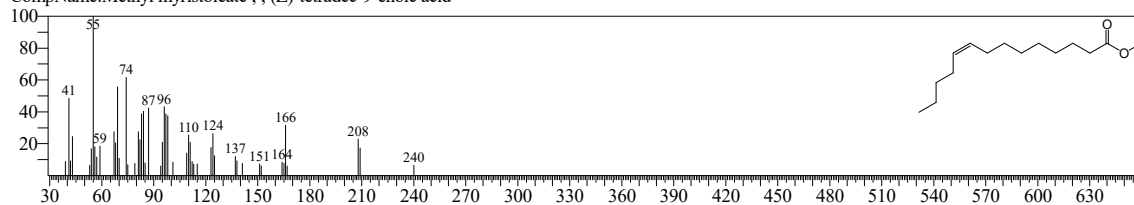

Hit#:2 Entry:11 Library:FA\_ME\_SP2560\_EI\_V3.lib

SI:41 Formula:C16H30O2 CAS:84743-29-3 MolWeight:254 RetIndex:2388

CompName:Methyl cis-10-pentadecenoate ; (Z)-pentadec-10-enoic acid

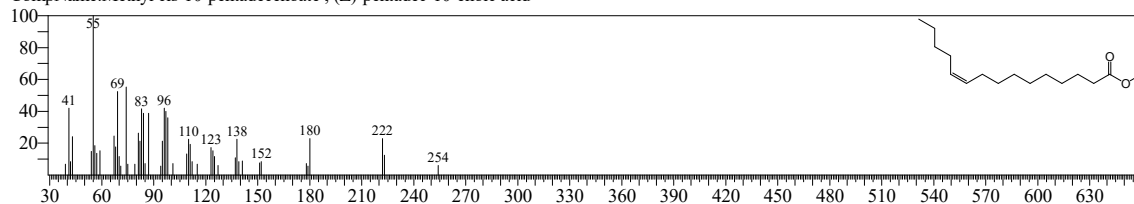

Hit#:3 Entry:13 Library:FA\_ME\_SP2560\_EI\_V3.lib

SI:41 Formula:C17H32O2 CAS:373-49-9 MolWeight:268 RetIndex:2478

CompName:Methyl palmitoleate ; Hexadec-9-enoic acid

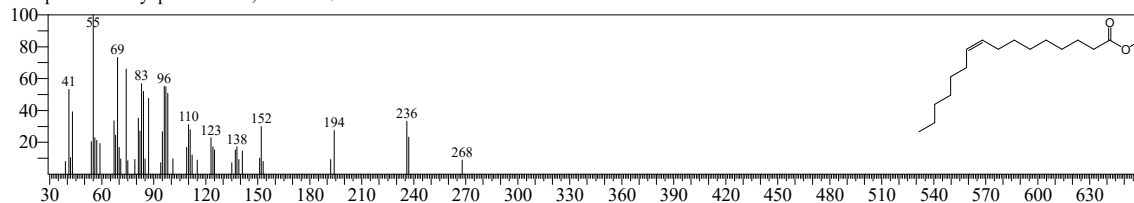

Hit#:4 Entry:24 Library:FA\_ME\_SP2560\_EI\_V3.lib

SI:41 Formula:C21H40O2 CAS:5561-99-9 MolWeight:324 RetIndex:2874

CompName:Methyl cis-11-icosenoate ; Icos-11-enoic acid

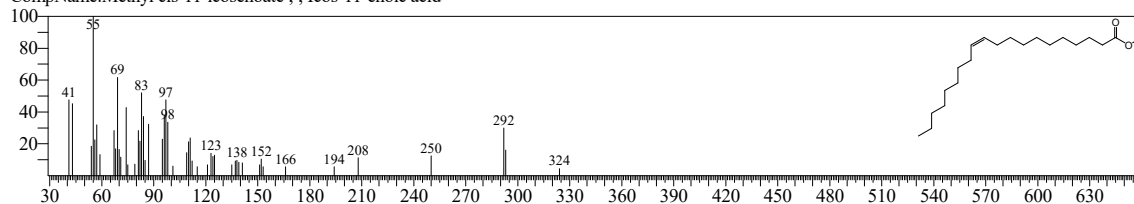

Hit#:5 Entry:15 Library:FA\_ME\_SP2560\_EI\_V3.lib

SI:40 Formula:C18H34O2 CAS:29743-97-3 MolWeight:282 RetIndex:2581

CompName:Methyl cis-10-heptadecenoate ; Heptadec-10-enoic acid

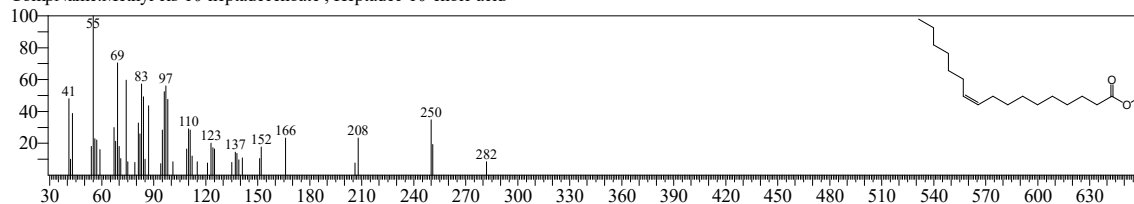

# TNAU

<< Target >>

Line#4 R.Time:12.500(Scan#:1501) MassPeaks:357

RawMode:Averaged 12.495-12.505(1500-1502) BasePeak:138.05(82765)

BG Mode:Calc. from Peak Group 1 - Event 1 Q3 Scan

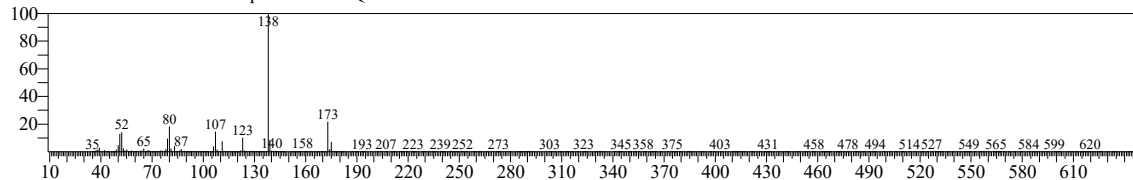

Hit#1 Entry:11187 Library:NIST20M1.lib

SI:74 Formula:C7H6O3 CAS:533-31-3 MolWeight:138 RetIndex:1245

CompName:1,3-Benzodioxol-5-ol \$\$ Phenol, 3,4-(methylenedioxy)- \$\$ Sesamol \$\$ 3,4-(Methylenedioxy)phenol \$\$ 5-Hydroxy-1,3-benzodioxole \$\$ Methy

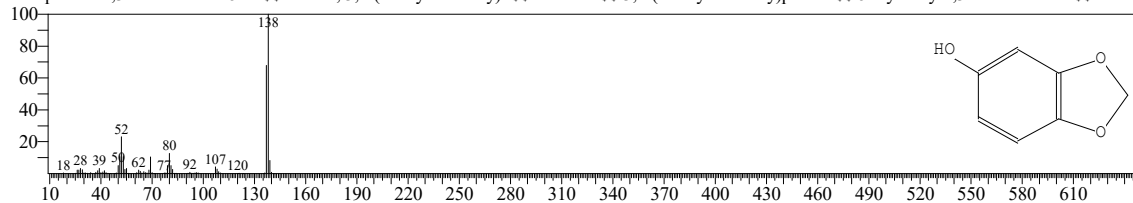

Hit#2 Entry:8360 Library:NIST20R.lib

SI:73 Formula:C6H6N2O2 CAS:105-11-3 MolWeight:138 RetIndex:1349

CompName:2,5-Cyclohexadiene-1,4-dione, dioxime \$\$ p-Benzoquinone, dioxime \$\$ p-Quinone dioxime \$\$ p-Quinone oxime \$\$ Benzoquinone dioxime \$\$

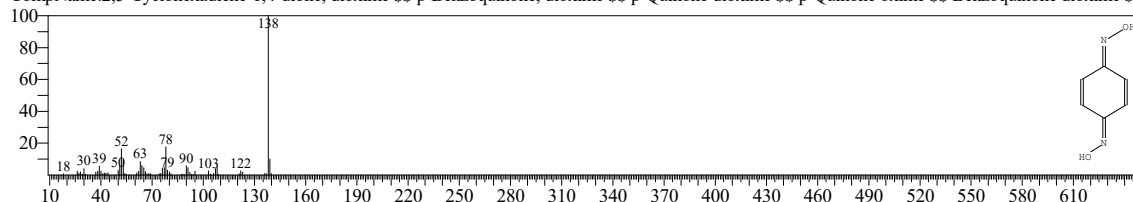

Hit#3 Entry:11188 Library:NIST20M1.lib

SI:73 Formula:C7H6O3 CAS:69393-72-2 MolWeight:138 RetIndex:1245

CompName:2,3-Methylenedioxyphenol \$\$ 1,3-Benzodioxol-4-ol #

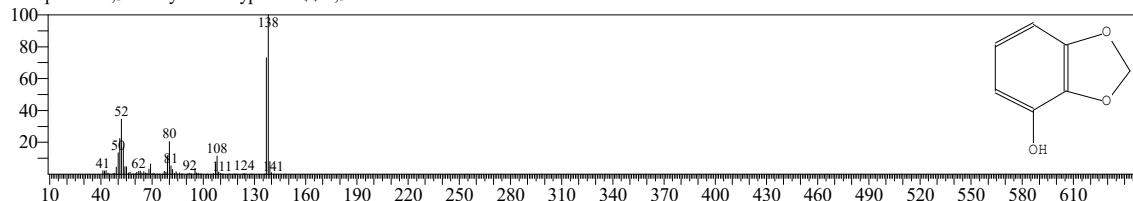

Hit#4 Entry:11222 Library:NIST20M1.lib

SI:71 Formula:C7H10N2O CAS:3471-32-7 MolWeight:138 RetIndex:1325

CompName:Hydrazine, (4-methoxyphenyl)- \$\$ (p-Methoxyphenyl)hydrazine \$\$ 1-(4-Methoxyphenyl)hydrazine #

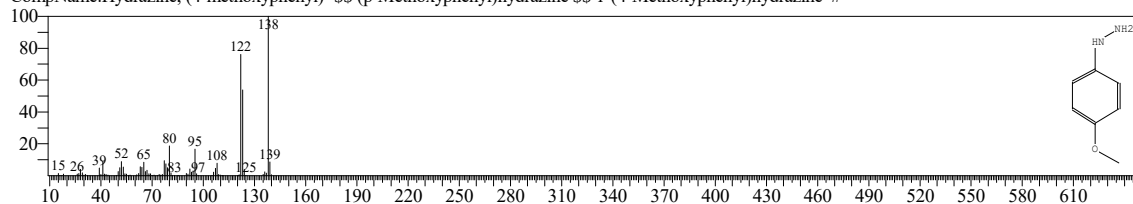

Hit#5 Entry:8422 Library:NIST20R.lib

SI:71 Formula:C7H10N2O CAS:25680-58-4 MolWeight:138 RetIndex:1070

CompName:2-Ethyl-3-methoxypyrazine \$\$ 2-Methoxy-3-ethylpyrazine \$\$ Pyrazine, 2-ethyl-3-methoxy- \$\$ 3-Ethyl-2-methoxypyrazine \$\$ Pyrazine, 3-ethyl-

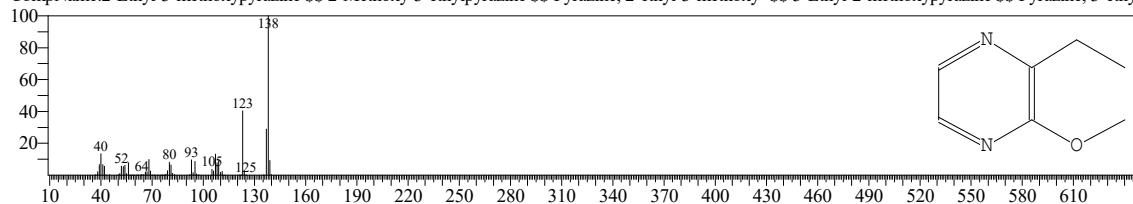

# TNAU

<< Target >>

Line#:5 R.Time:12.830(Scan#:1567) MassPeaks:321

RawMode:Averaged 12.825-12.835(1566-1568) BasePeak:138.05(122366)

BG Mode:Calc. from Peak Group 1 - Event 1 Q3 Scan

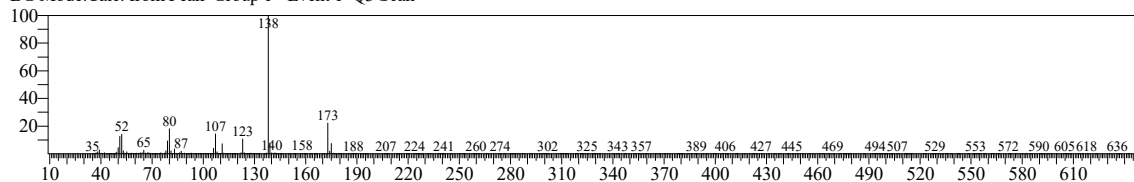

Hit#:1 Entry:11187 Library:NIST20M1.lib

SI:74 Formula:C7H6O3 CAS:533-31-3 MolWeight:138 RetIndex:1245

CompName:1,3-Benzodioxol-5-ol \$\$ Phenol, 3,4-(methylenedioxy)- \$\$ Sesamol \$\$ 3,4-(Methylenedioxy)phenol \$\$ 5-Hydroxy-1,3-benzodioxole \$\$ Methy

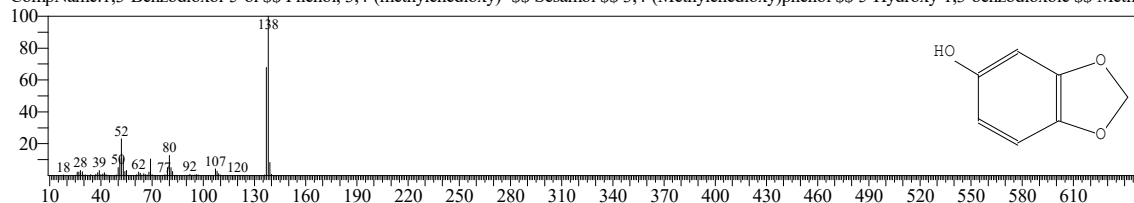

Hit#:2 Entry:8360 Library:NIST20R.lib

SI:73 Formula:C6H6N2O2 CAS:105-11-3 MolWeight:138 RetIndex:1349

CompName:2,5-Cyclohexadiene-1,4-dione, dioxime \$\$ p-Benzoquinone, dioxime \$\$ p-Quinone dioxime \$\$ p-Quinone oxime \$\$ Benzoquinone dioxime \$\$

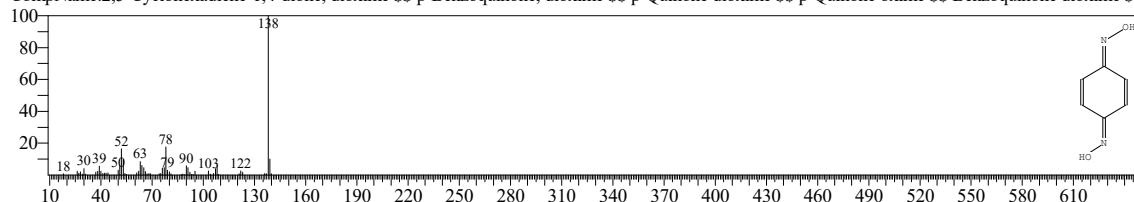

Hit#:3 Entry:11188 Library:NIST20M1.lib

SI:72 Formula:C7H6O3 CAS:69393-72-2 MolWeight:138 RetIndex:1245

CompName:2,3-Methylenedioxyphenol \$\$ 1,3-Benzodioxol-4-ol #

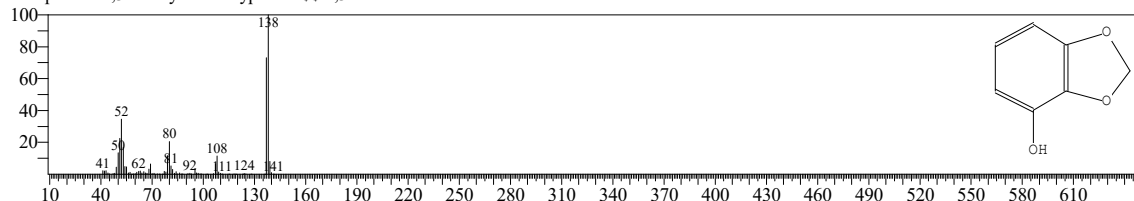

Hit#:4 Entry:8422 Library:NIST20R.lib

SI:71 Formula:C7H10N2O CAS:25680-58-4 MolWeight:138 RetIndex:1070

CompName:2-Ethyl-3-methoxypyrazine \$\$ 2-Methoxy-3-ethylpyrazine \$\$ Pyrazine, 2-ethyl-3-methoxy- \$\$ 3-Ethyl-2-methoxypyrazine \$\$ Pyrazine, 3-ethyl-

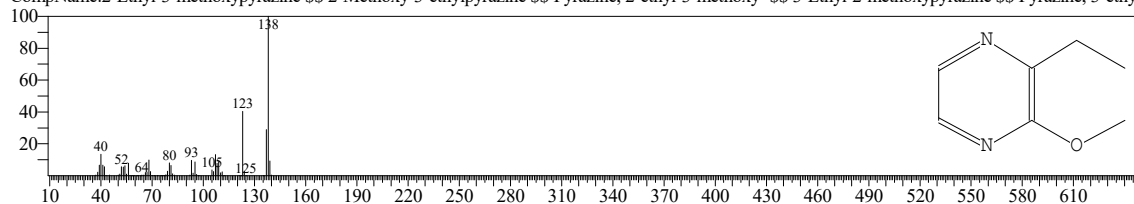

Hit#:5 Entry:11222 Library:NIST20M1.lib

SI:70 Formula:C7H10N2O CAS:3471-32-7 MolWeight:138 RetIndex:1325

CompName:Hydrazine, (4-methoxyphenyl)- \$\$ (p-Methoxyphenyl)hydrazine \$\$ 1-(4-Methoxyphenyl)hydrazine #

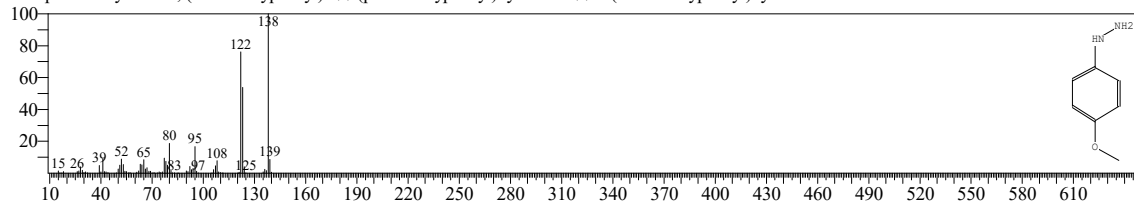

# TNAU

<< Target >>

Line#:6 R.Time:13.395(Scan#:1680) MassPeaks:284

RawMode:Averaged 13.390-13.400(1679-1681) BasePeak:155.05(85487)

BG Mode:Calc. from Peak Group 1 - Event 1 Q3 Scan

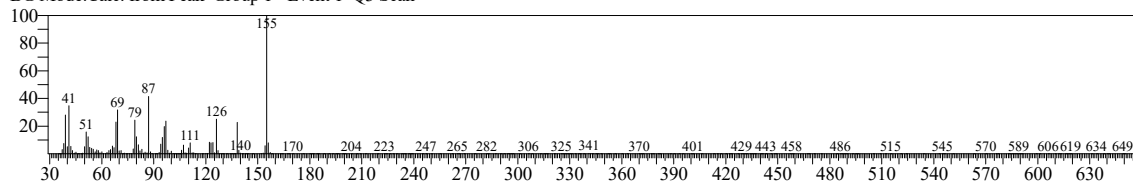

Hit#:1 Entry:34 Library:FA\_ME\_SP2560\_EI\_V3.lib

SI:53 Formula:C23H42O2 CAS:7370-49-2 MolWeight:350 RetIndex:3169

CompName:Methyl cis-13,16-Docosadienate ; (13Z,16E)-docosa-13,16-dienoic acid

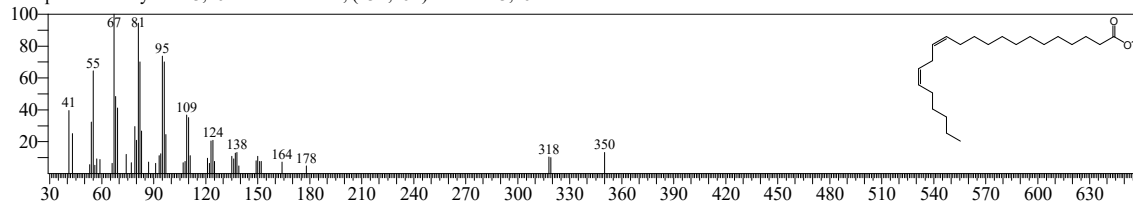

Hit#:2 Entry:21 Library:FA\_ME\_SP2560\_EI\_V3.lib

SI:52 Formula:C19H34O2 CAS:60-33-3 MolWeight:294 RetIndex:2775

CompName:Methyl linoleate ; Octadeca-9,12-dienoic acid

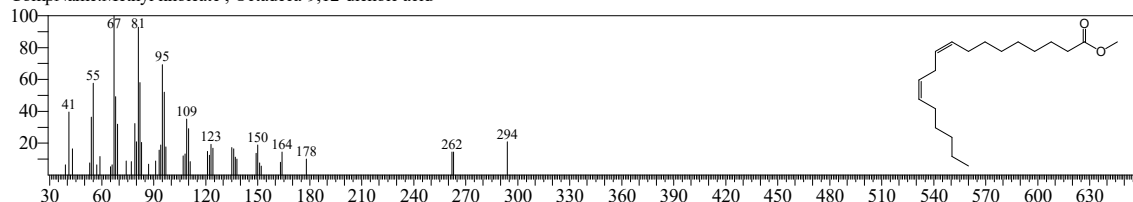

Hit#:3 Entry:20 Library:FA\_ME\_SP2560\_EI\_V3.lib

SI:52 Formula:C19H34O2 CAS:506-21-8 MolWeight:294 RetIndex:2727

CompName:Methyl linolelaidate ; (9E,12E)-octadeca-9,12-dienoic acid

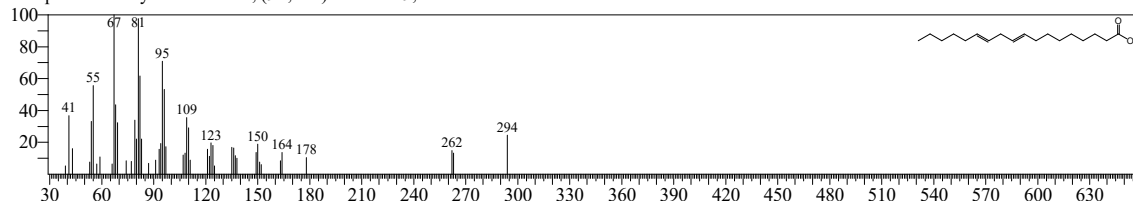

Hit#:4 Entry:11 Library:FA\_ME\_SP2560\_EI\_V3.lib

SI:51 Formula:C16H30O2 CAS:84743-29-3 MolWeight:254 RetIndex:2388

CompName:Methyl cis-10-pentadecenoate ; (Z)-pentadec-10-enoic acid

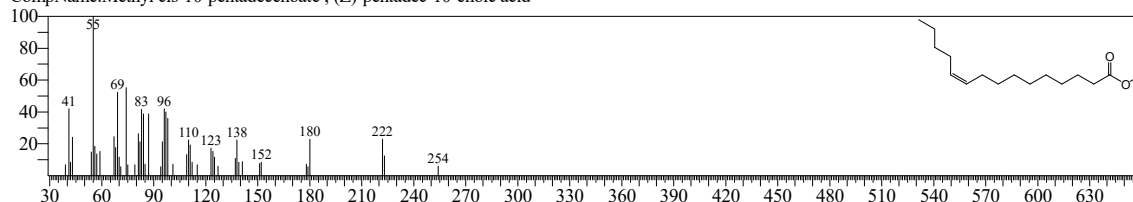

Hit#:5 Entry:27 Library:FA\_ME\_SP2560\_EI\_V3.lib

SI:51 Formula:C21H38O2 CAS:2091-39-6 MolWeight:322 RetIndex:2973

CompName:Methyl cis-11,14-Icosadienoate ; ; Icosa-11,14-dienoic acid

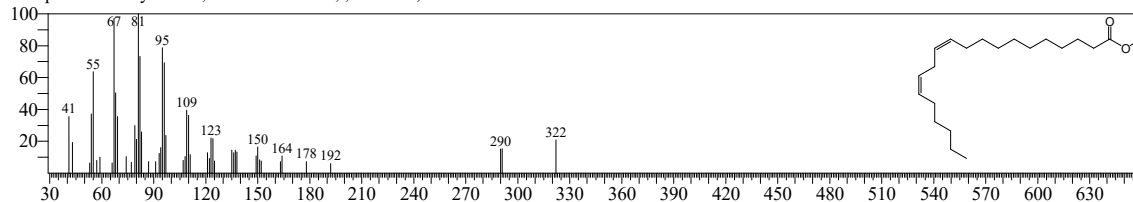

# TNAU

<< Target >>

Line#:7 R.Time:13.580(Scan#:1717) MassPeaks:366

RawMode:Averaged 13.575-13.585(1716-1718) BasePeak:155.05(86139)

BG Mode:Calc. from Peak Group 1 - Event 1 Q3 Scan

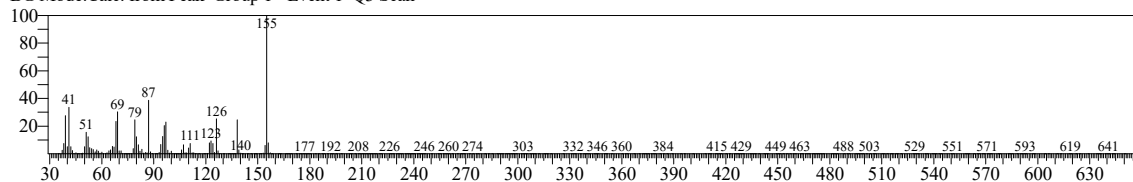

Hit#:1 Entry:34 Library:FA\_ME\_SP2560\_EI\_V3.lib

SI:53 Formula:C23H42O2 CAS:7370-49-2 MolWeight:350 RetIndex:3169

CompName:Methyl cis-13,16-Docosadienate ; (13Z,16E)-docosa-13,16-dienoic acid



Hit#:2 Entry:21 Library:FA\_ME\_SP2560\_EI\_V3.lib

SI:52 Formula:C19H34O2 CAS:60-33-3 MolWeight:294 RetIndex:2775

CompName:Methyl linoleate ; Octadeca-9,12-dienoic acid



Hit#:3 Entry:20 Library:FA\_ME\_SP2560\_EI\_V3.lib

SI:52 Formula:C19H34O2 CAS:506-21-8 MolWeight:294 RetIndex:2727

CompName:Methyl linolelaidate ; (9E,12E)-octadeca-9,12-dienoic acid



Hit#:4 Entry:11 Library:FA\_ME\_SP2560\_EI\_V3.lib

SI:51 Formula:C16H30O2 CAS:84743-29-3 MolWeight:254 RetIndex:2388

CompName:Methyl cis-10-pentadecenoate ; (Z)-pentadec-10-enoic acid

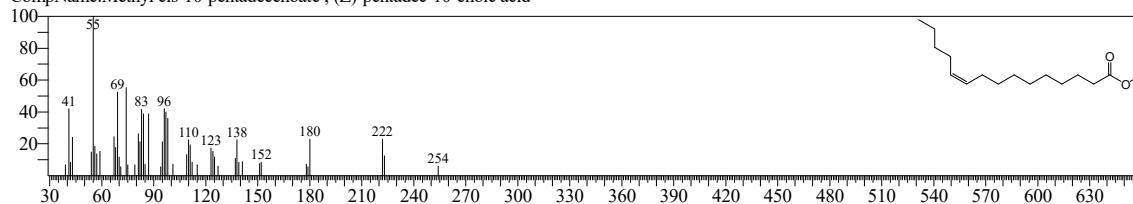

Hit#:5 Entry:27 Library:FA\_ME\_SP2560\_EI\_V3.lib

SI:51 Formula:C21H38O2 CAS:2091-39-6 MolWeight:322 RetIndex:2973

CompName:Methyl cis-11,14-Icosadienoate ; ; Icosa-11,14-dienoic acid





# TNAU

<< Target >>

Line#:8 R.Time:13.815(Scan#:1764) MassPeaks:392

RawMode:Averaged 13.810-13.820(1763-1765) BasePeak:221.10(1599)

BG Mode:Calc. from Peak Group 1 - Event 1 Q3 Scan

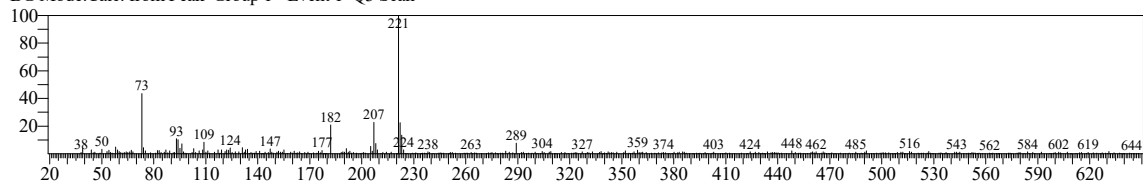

Hit#:1 Entry:28950 Library:NIST20R.lib

SI:73 Formula:C8H24O2Si3 CAS:107-51-7 MolWeight:236 RetIndex:698

CompName:Trisiloxane, octamethyl- \$\$(CH\_3)\_3Si-O-Si(CH\_3)\_2-O-Si(CH\_3)\_3\$\$

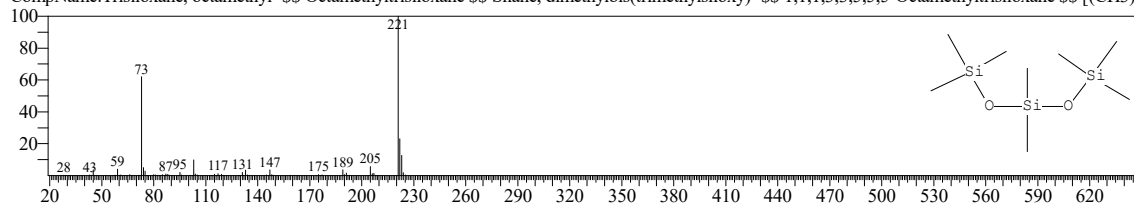

Hit#:2 Entry:3 Library:OA\_TMS\_DB5\_67min\_V3.lib

SI:54 Formula:C9H27BO3Si3 CAS:10043-35-3 MolWeight:278 RetIndex:992

CompName:Boric acid-3TMS ; boric acid

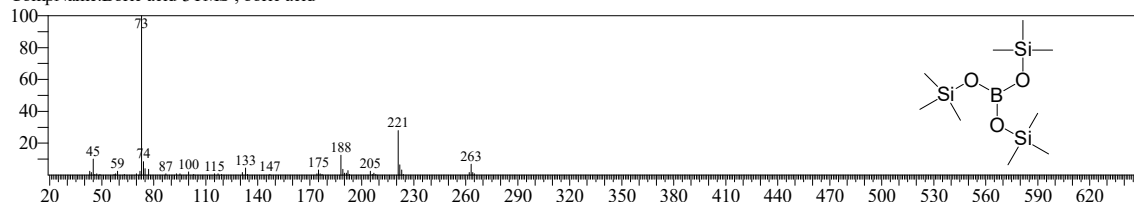

Hit#:3 Entry:24 Library:OA\_TMS\_DB5\_67min\_V3.lib

SI:44 Formula:C2O4Si2 CAS:0-00-0 MolWeight:236 RetIndex:1130

CompName:Oxalic acid-1,3C2-2TMS ;

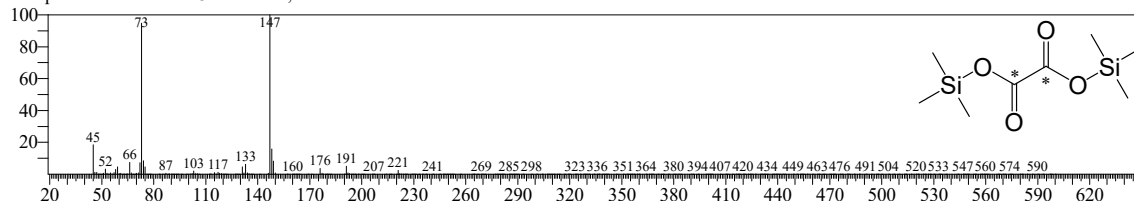

Hit#:4 Entry:6 Library:OA\_TMS\_DB5\_67min\_V3.lib

SI:44 Formula:C5H9Cl3O2Si CAS:76-03-9 MolWeight:234 RetIndex:1059

CompName:Trichloroacetic acid-TMS ; 2,2,2-trichloroacetic acid

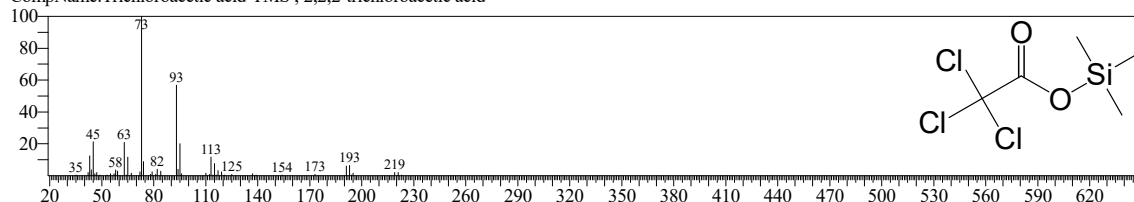

Hit#:5 Entry:28 Library:OA\_TMS\_DB5\_67min\_V3.lib

SI:43 Formula:C5H9Cl3O2Si CAS:347840-04-4 MolWeight:236 RetIndex:1140

CompName:Sarcosine-d3-2TMS ;

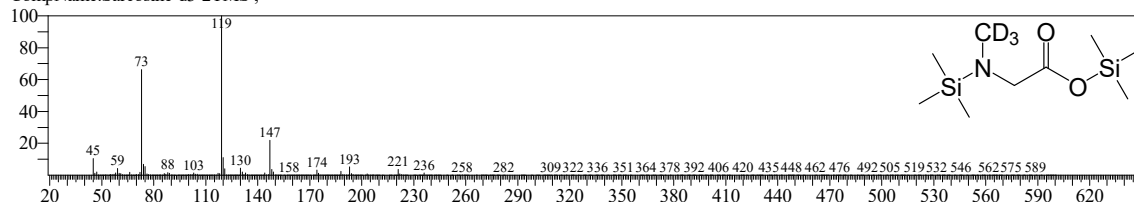

# TNAU

<< Target >>

Line#9 R.Time:14.480(Scan#:1897) MassPeaks:283

RawMode:Averaged 14.475-14.485(1896-1898) BasePeak:163.10(1316)

BG Mode:Calc. from Peak Group 1 - Event 1 Q3 Scan

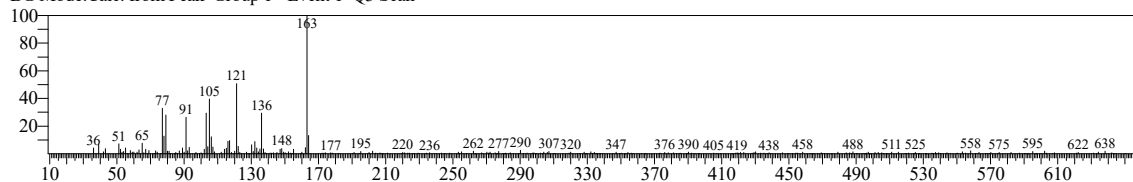

Hit#:1 Entry:25351 Library:NIST20M1.lib

SI:74 Formula:C10H12O2 CAS:38998-17-3 MolWeight:164 RetIndex:1398

CompName:2,3-Dimethyl-para-anisaldehyde \$\$ Benzaldehyde, 4-methoxy-2,3-dimethyl- \$\$ 4-Methoxy-2,3-dimethylbenzaldehyde #

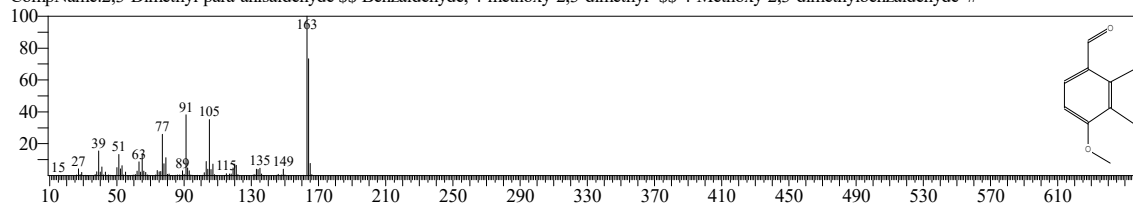

Hit#:2 Entry:176186 Library:NIST20M1.lib

SI:73 Formula:C17H17N3O3 CAS:0-00-0 MolWeight:311 RetIndex:3129

CompName:Oxalic acid, monoamide monohydrate, N-(2,4-dimethylphenyl)-N''-salicylidene- \$\$ N-(2,4-Dimethylphenyl)-2-[(2E)-2-(2-hydroxybenzylidene)-

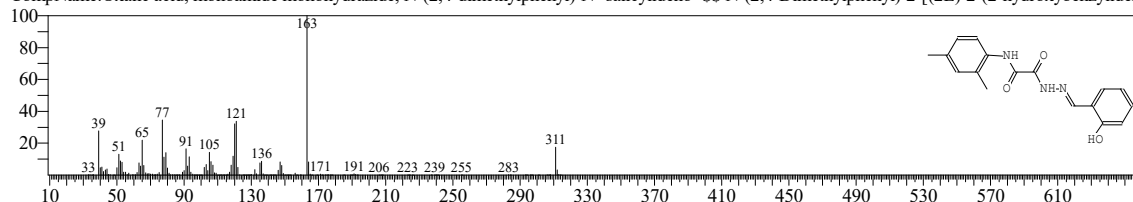

Hit#:3 Entry:57597 Library:NIST20M1.lib

SI:73 Formula:C10H11N3S CAS:39181-45-8 MolWeight:205 RetIndex:1890

CompName:5-(4-Methylbenzyl)-1,3,4-thiadiazol-2-amine \$\$ 1,3,4-Thiadiazol-2-amine, 5-[(4-methylphenyl)methyl]- \$\$ 5-[(4-Methylphenyl)methyl]-1,3,4-th

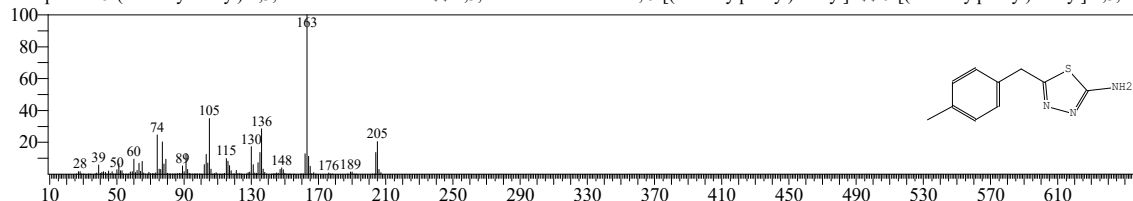

Hit#:4 Entry:14259 Library:NIST20R.lib

SI:72 Formula:C9H9NS CAS:40046-30-8 MolWeight:163 RetIndex:0

CompName:3,5-Dimethylphenyl isothiocyanate \$\$ 1-Isothiocyanato-3,5-dimethylbenzene #

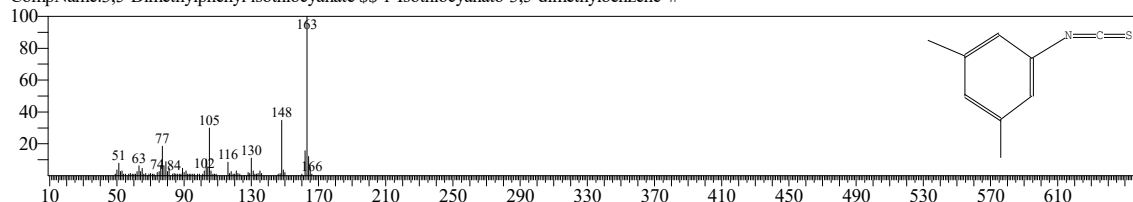

Hit#:5 Entry:24770 Library:NIST20M1.lib

SI:72 Formula:C10H13NO CAS:826-54-0 MolWeight:163 RetIndex:1417

CompName:Hydratropamide, .alpha.-methyl- \$\$ L-16332 \$\$ .alpha.-Methylhydratropamide \$\$ 2-Methyl-2-phenylpropionamide \$\$ Benzenacetic acid, .alpha.

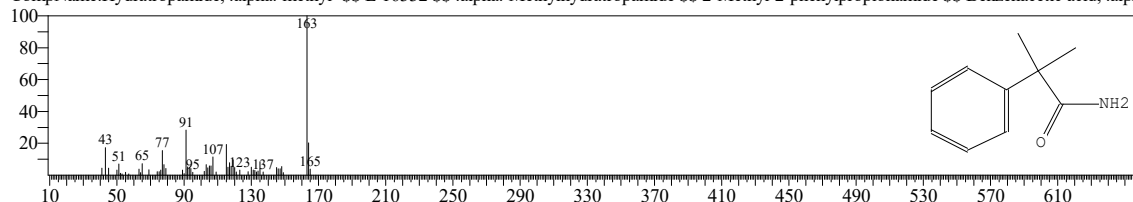

# TNAU

<< Target >>

Line#:10 R.Time:18.120(Scan#:2625) MassPeaks:340

RawMode:Averaged 18.115-18.125(2624-2626) BasePeak:60.00(7603)

BG Mode:Calc. from Peak Group 1 - Event 1 Q3 Scan

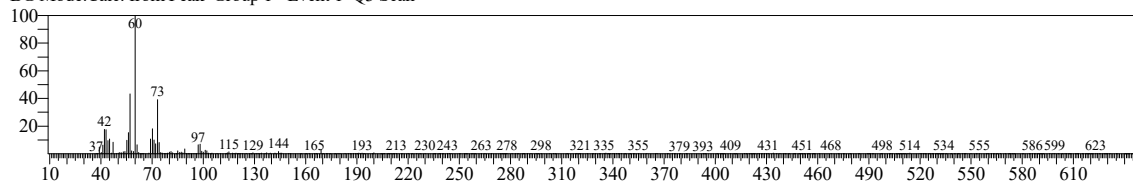

Hit#:1 Entry:36240 Library:NIST20M1.lib

SI:95 Formula:C<sub>6</sub>H<sub>12</sub>O<sub>6</sub> CAS:2595-97-3 MolWeight:180 RetIndex:1698

CompName:D-Allose \$\$ .beta.-D-Allose \$\$ Hexose #

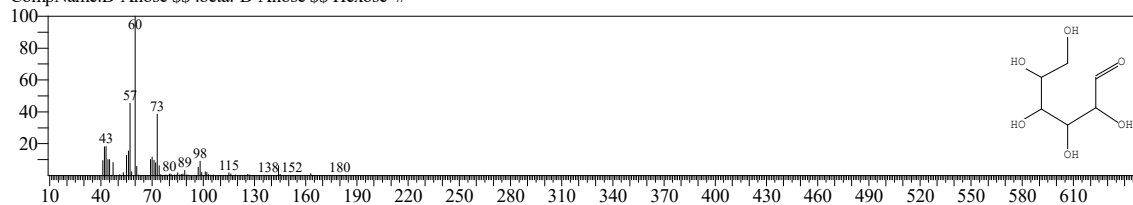

Hit#:2 Entry:13905 Library:NIST20R.lib

SI:93 Formula:C<sub>6</sub>H<sub>10</sub>O<sub>5</sub> CAS:498-07-7 MolWeight:162 RetIndex:1404

CompName:.beta.-D-Glucopyranose, 1,6-anhydro- \$\$ Anhydro-d-mannosan \$\$ Levoglucosan \$\$ 1,6-Anhydro-.beta.-D-glucopyranose \$\$ 1,6-Anhydro-beta-

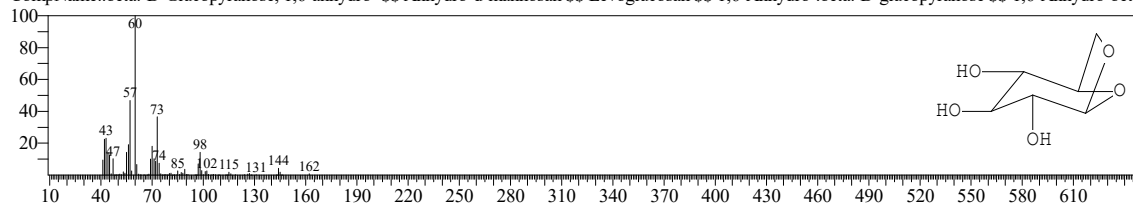

Hit#:3 Entry:23812 Library:NIST20M1.lib

SI:92 Formula:C<sub>6</sub>H<sub>10</sub>O<sub>5</sub> CAS:0-00-0 MolWeight:162 RetIndex:1404

CompName:1,6-Anhydro-.beta.-d-talopyranose

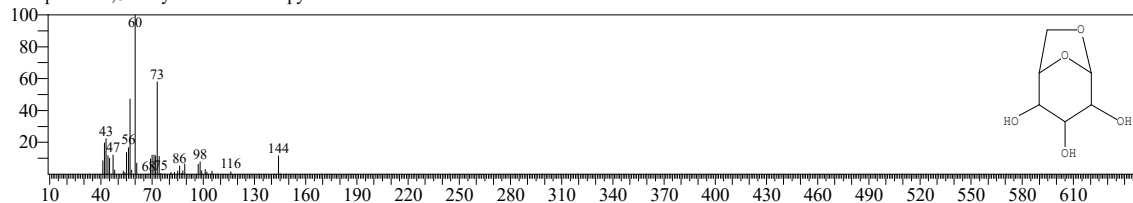

Hit#:4 Entry:23808 Library:NIST20M1.lib

SI:89 Formula:C<sub>6</sub>H<sub>10</sub>O<sub>5</sub> CAS:0-00-0 MolWeight:162 RetIndex:1400

CompName:3,4-Altrosan \$\$ 3,4-Anhydrohexopyranose #

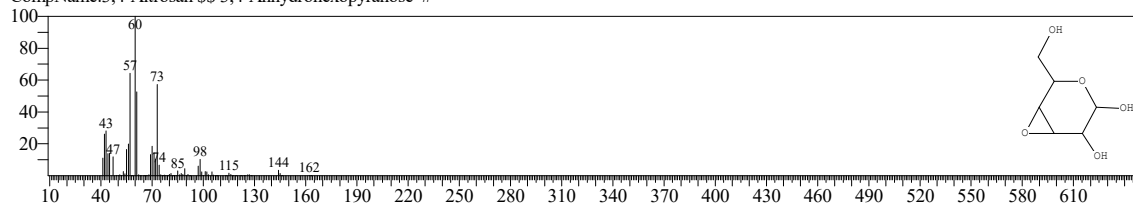

Hit#:5 Entry:47352 Library:NIST20M1.lib

SI:85 Formula:C<sub>7</sub>H<sub>14</sub>O<sub>6</sub> CAS:709-50-2 MolWeight:194 RetIndex:1714

CompName:.beta.-D-Glucopyranoside, methyl \$\$ Glucopyranoside, methyl, .beta.-D- \$\$ Methyl .beta.-D-glucopyranoside \$\$ Methyl .beta.-D-glucoside \$\$ 1

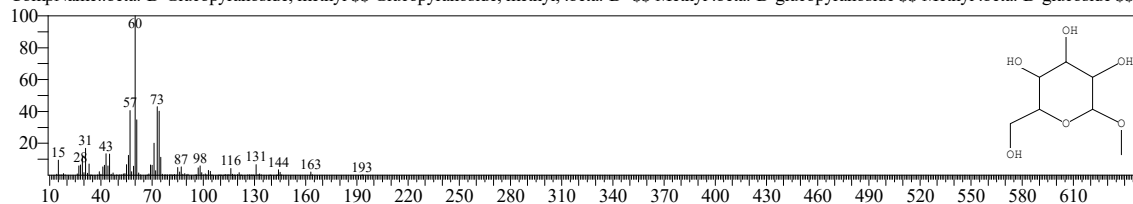

# TNAU

<< Target >>

Line#:11 R.Time:19.195(Scan#:2840) MassPeaks:346

RawMode:Averaged 19.190-19.200(2839-2841) BasePeak:263.15(4784)

BG Mode:Calc. from Peak Group 1 - Event 1 Q3 Scan

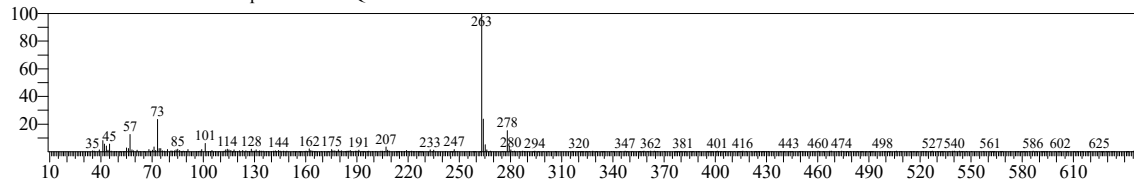

Hit#:1 Entry:137399 Library:NIST20M1.lib

SI:84 Formula:C17H30OSi CAS:53925-65-8 MolWeight:278 RetIndex:1632

CompName:2,4-Di-tert-butylphenoxytrimethylsilane \$ Benzene, 2,4-bis(1,1-dimethylethyl)-1-[(trimethylsilyl)oxy]- \$ Silane, [2,4-bis(1,1-dimethylethyl)ph

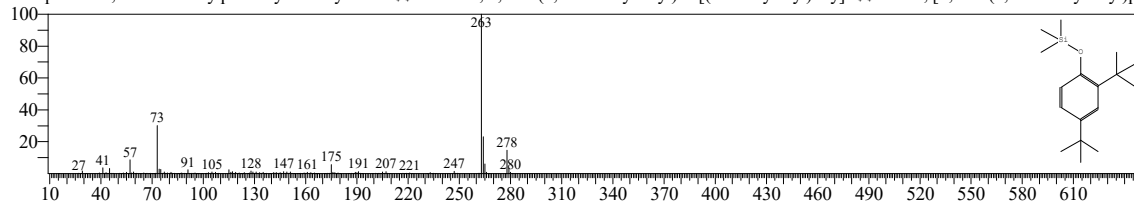

Hit#:2 Entry:136557 Library:NIST20M1.lib

SI:78 Formula:C12H22N4Si2 CAS:0-00-0 MolWeight:278 RetIndex:1703

CompName:3-Deazaadenine, 2TMS \$ 3-Deazaadenine, N,N'-bis-TMS \$ 1H-Imidazo[4,5-c]pyridin-4-amine, N,N'-bis-TMS

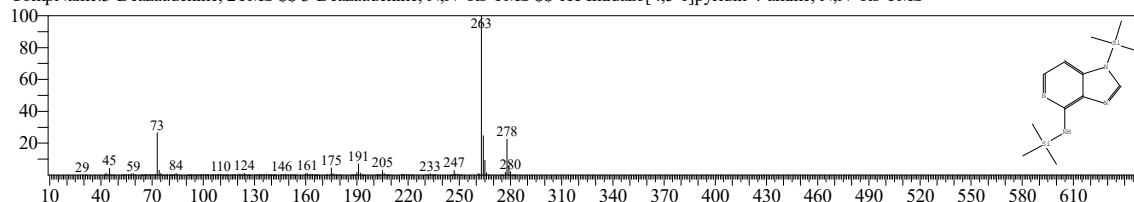

Hit#:3 Entry:33871 Library:NIST20R.lib

SI:77 Formula:C17H30OSi CAS:10416-73-6 MolWeight:278 RetIndex:1632

CompName:2,6-Bis(tert-butyl)phenol, TMS derivative \$ Trimethyl(2,6 di-tert-butylphenoxy)silane \$ (2,6-Di-tert-butylphenoxy)(trimethyl)silane #

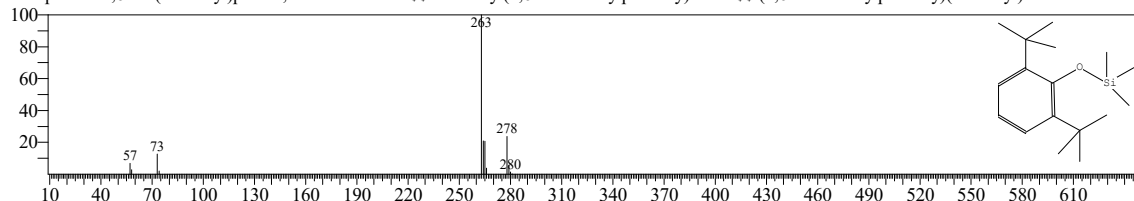

Hit#:4 Entry:137020 Library:NIST20M1.lib

SI:75 Formula:C15H22O3Si CAS:0-00-0 MolWeight:278 RetIndex:1736

CompName:6-Methoxy-2,2-dimethyl-2,3-dihydro-4H-chromen-4-one, TMS \$ 6-Methoxy-2,2-dimethyl-chroman-4-one, O-trimethylsilyl- \$ 4H-1-Benzopy

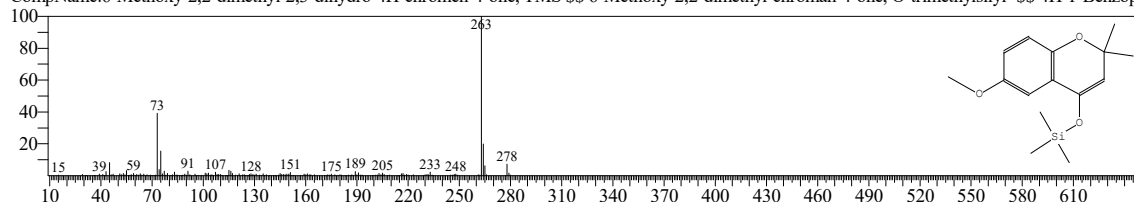

Hit#:5 Entry:136556 Library:NIST20M1.lib

SI:74 Formula:C12H22N4Si2 CAS:0-00-0 MolWeight:278 RetIndex:1606

CompName:1H,1'H-2,2'-Biimidazole, 2TMS \$ 1H,1'H-2,2'-Biimidazole, N,N'-bis-TMS \$ 1H,1'H-[2,2']Biimidazolyl, 2TMS \$ 2,2'-Bi-1H-imidazole, 2TMS

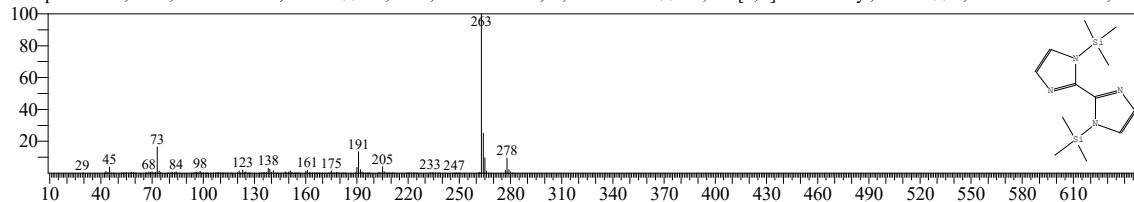

# TNAU

<< Target >>

Line#:12 R.Time:28.160(Scan#:4633) MassPeaks:361

RawMode:Averaged 28.155-28.165(4632-4634) BasePeak:149.00(2927)

BG Mode:Calc. from Peak Group 1 - Event 1 Q3 Scan

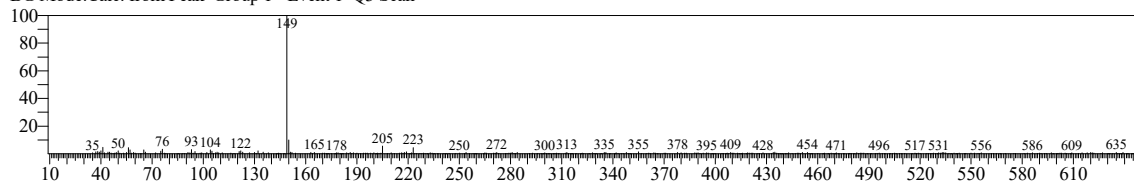

Hit#:1 Entry:33848 Library:NIST20R.lib

SI:87 Formula:C16H22O4 CAS:84-74-2 MolWeight:278 RetIndex:2037

CompName:Dibutyl phthalate \$\$ 1,2-Benzenedicarboxylic acid, dibutyl ester \$\$ Phthalic acid, dibutyl ester \$\$ n-Butyl phthalate \$\$ Butyl phthalate \$\$ Cellu

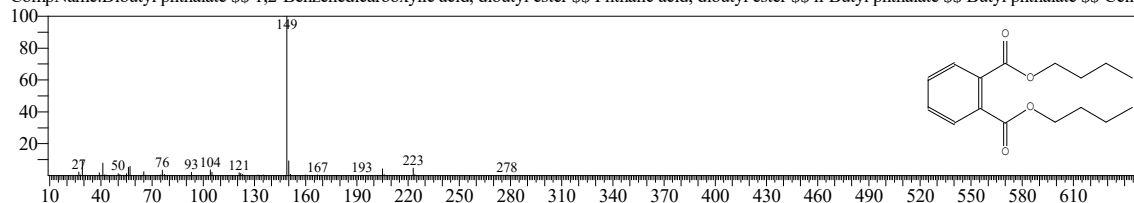

Hit#:2 Entry:137121 Library:NIST20M1.lib

SI:87 Formula:C16H22O4 CAS:1962-75-0 MolWeight:278 RetIndex:2037

CompName:1,4-Dibutyl benzene-1,4-dicarboxylate \$\$ Benzene-1,4-dicarboxylic acid dibutyl ester

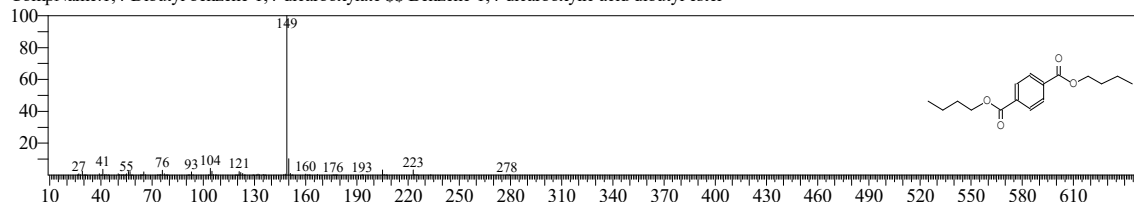

Hit#:3 Entry:137178 Library:NIST20M1.lib

SI:86 Formula:C16H22O4 CAS:17851-53-5 MolWeight:278 RetIndex:1973

CompName:1,2-Benzenedicarboxylic acid, butyl 2-methylpropyl ester \$\$ Phthalic acid, butyl isobutyl ester \$\$ 1-Butyl 2-isobutyl phthalate \$\$ 2-Methylprop

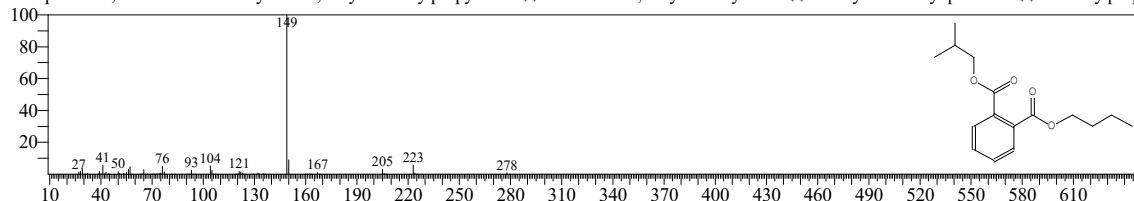

Hit#:4 Entry:170712 Library:NIST20M1.lib

SI:85 Formula:C18H26O4 CAS:0-00-0 MolWeight:306 RetIndex:2235

CompName:Phthalic acid, butyl hexyl ester

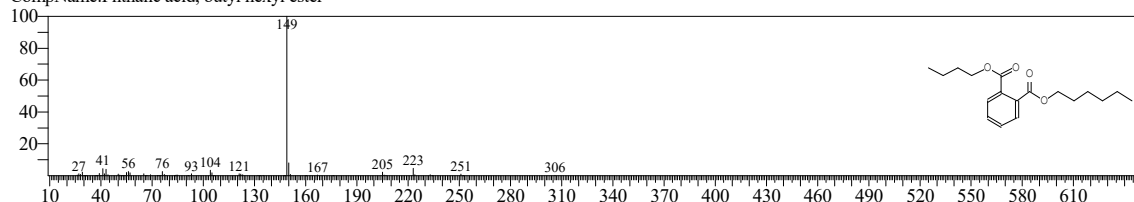

Hit#:5 Entry:137125 Library:NIST20M1.lib

SI:85 Formula:C16H22O4 CAS:84-69-5 MolWeight:278 RetIndex:1908

CompName:1,2-Benzenedicarboxylic acid, bis(2-methylpropyl) ester \$\$ Phthalic acid, diisobutyl ester \$\$ Diisobutyl phthalate \$\$ Hexaplas M/1B \$\$ Isobuty

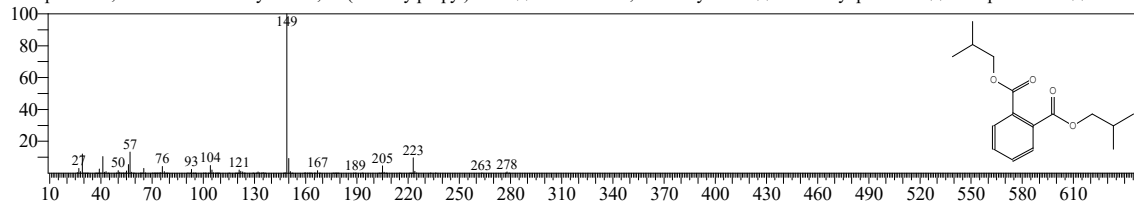

# TNAU

<< Target >>

Line#:13 R.Time:28.300(Scan#:4661) MassPeaks:364

RawMode:Averaged 28.295-28.305(4660-4662) BasePeak:73.05(8144)

BG Mode:Calc. from Peak Group 1 - Event 1 Q3 Scan

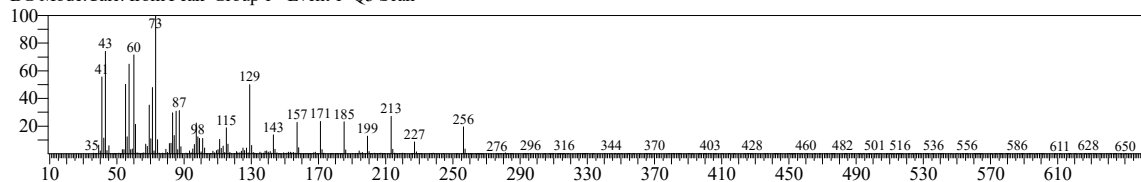

Hit#:1 Entry:31600 Library:NIST20R.lib

SI:95 Formula:C16H32O2 CAS:57-10-3 MolWeight:256 RetIndex:1968

CompName:n-Hexadecanoic acid \$ Hexadecanoic acid \$ n-Hexadecic acid \$ Palmitic acid \$ Pentadecanecarboxylic acid \$ 1-Pentadecanecarboxylic

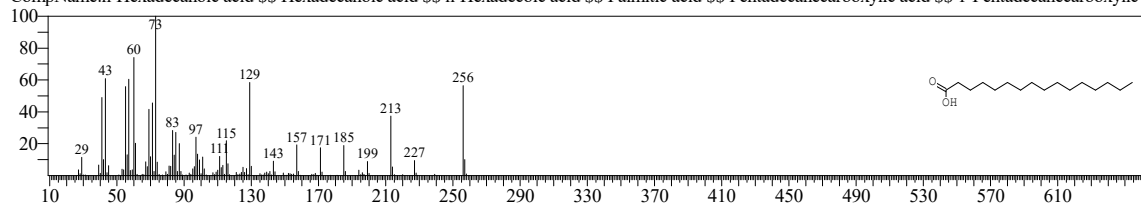

Hit#:2 Entry:29890 Library:NIST20R.lib

SI:91 Formula:C15H30O2 CAS:1002-84-2 MolWeight:242 RetIndex:1869

CompName:Pentadecanoic acid \$ Pentadecylic acid \$ n-Pentadecanoic acid \$ n-Pentadecylic acid

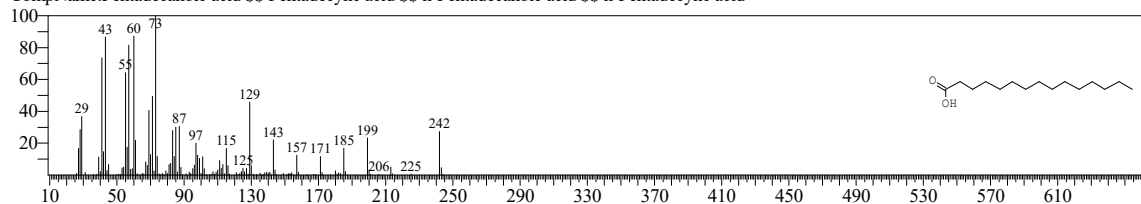

Hit#:3 Entry:44286 Library:NIST20M2.lib

SI:91 Formula:C38H68O8 CAS:28474-90-0 MolWeight:652 RetIndex:4765

CompName:l-(+)-Ascorbic acid 2,6-dihexadecanoate

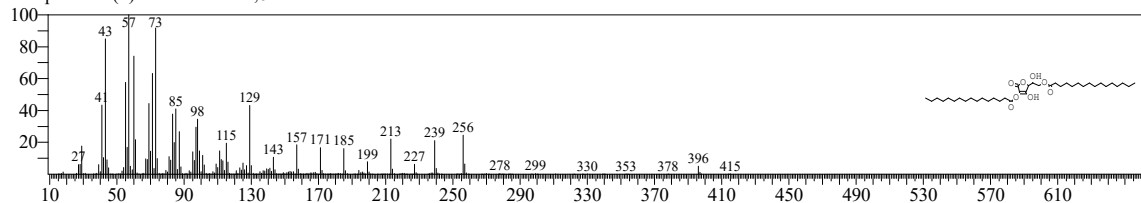

Hit#:4 Entry:25643 Library:NIST20R.lib

SI:90 Formula:C13H26O2 CAS:638-53-9 MolWeight:214 RetIndex:1670

CompName:Tridecanoic acid \$ n-Tridecanoic acid \$ n-Tridecoic acid \$ Tridecyllic acid

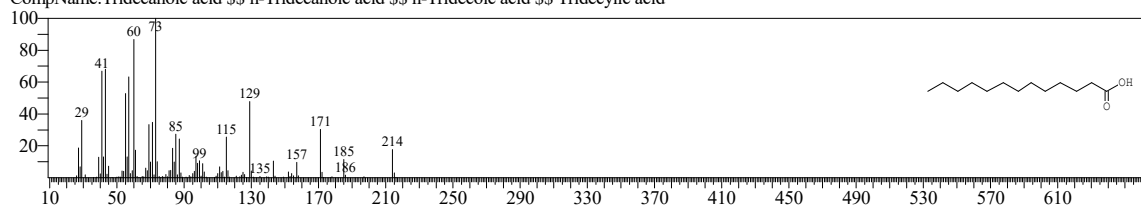

Hit#:5 Entry:81713 Library:NIST20M1.lib

SI:90 Formula:C14H28O2 CAS:544-63-8 MolWeight:228 RetIndex:1769

CompName:Tetradecanoic acid \$ Myristic acid \$ n-Tetradecanoic acid \$ n-Tetradecic acid \$ Neo-Fat 14 \$ Univol U 316S \$ 1-Tridecanecarboxylic ;

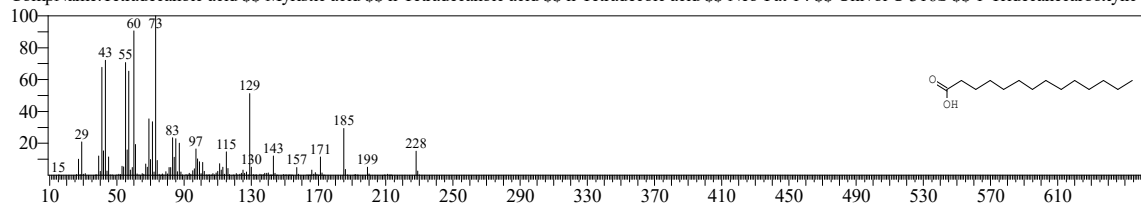

# TNAU

<< Target >>

Line#:14 R.Time:31.480(Scan#:5297) MassPeaks:341

RawMode:Averaged 31.475-31.485(5296-5298) BasePeak:67.05(5812)

BG Mode:Calc. from Peak Group 1 - Event 1 Q3 Scan

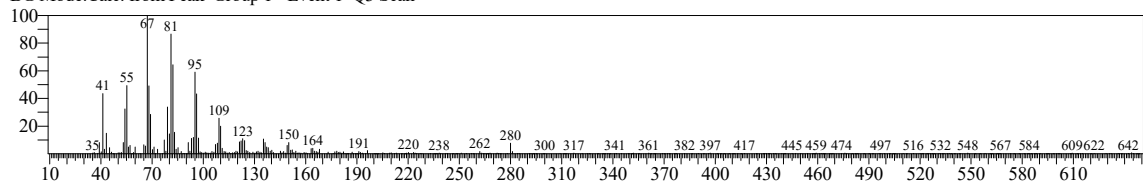

Hit#:1 Entry:139646 Library:NIST20M1.lib

SI:95 Formula:C18H32O2 CAS:2420-56-6 MolWeight:280 RetIndex:2183

CompName:10E,12Z-Octadecadienoic acid

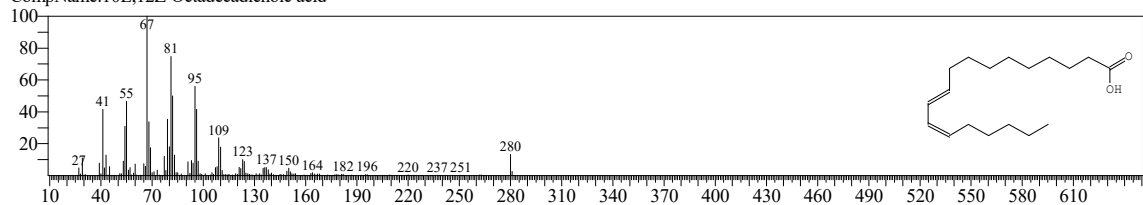

Hit#:2 Entry:34035 Library:NIST20R.lib

SI:95 Formula:C18H32O2 CAS:60-33-3 MolWeight:280 RetIndex:2183

CompName:9,12-Octadecadienoic acid (Z,Z)- \$\$ cis-9,cis-12-Octadecadienoic acid \$\$ cis-Linoleic acid \$\$ Grape seed oil \$\$ Linoleic \$\$ Linoleic acid \$

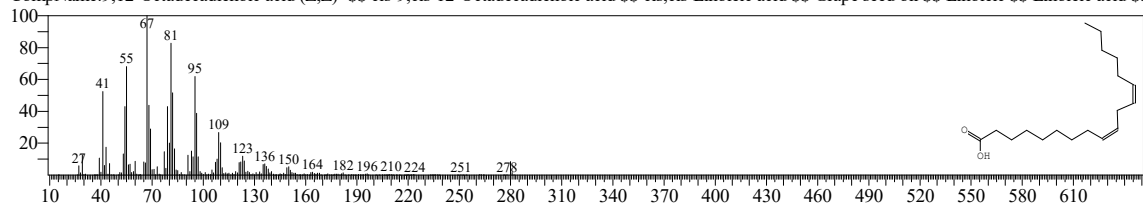

Hit#:3 Entry:139651 Library:NIST20M1.lib

SI:95 Formula:C18H32O2 CAS:544-71-8 MolWeight:280 RetIndex:2183

CompName:(9E,11E)-Octadecadienoic acid

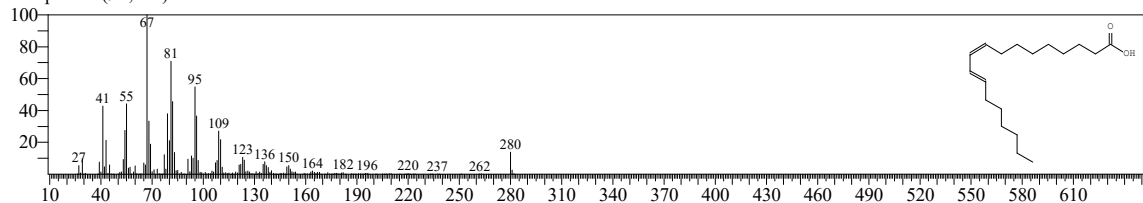

Hit#:4 Entry:139661 Library:NIST20M1.lib

SI:94 Formula:C18H32O2 CAS:506-21-8 MolWeight:280 RetIndex:2183

CompName:Linoelaidic acid

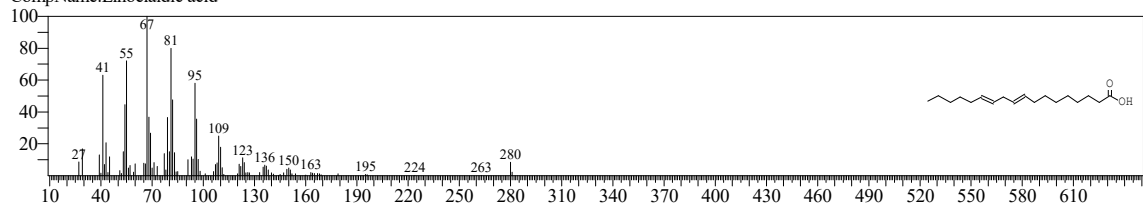

Hit#:5 Entry:173215 Library:NIST20M1.lib

SI:93 Formula:C20H36O2 CAS:2091-39-6 MolWeight:308 RetIndex:2382

CompName:11,14-Eicosadienoic acid

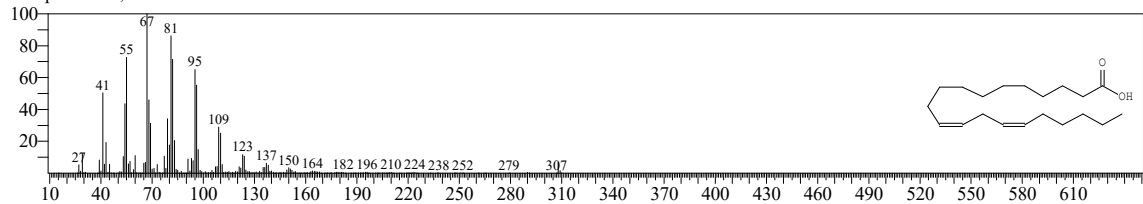

# TNAU

<< Target >>

Line#:15 R.Time:31.585(Scan#:5318) MassPeaks:329

RawMode:Averaged 31.580-31.590(5317-5319) BasePeak:55.10(2678)

BG Mode:Calc. from Peak Group 1 - Event 1 Q3 Scan

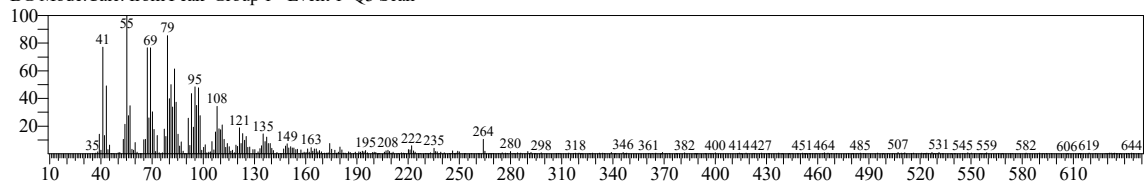

Hit#:1 Entry:63176 Library:NIST20M1.lib

SI:88 Formula:C14H26O CAS:65128-96-3 MolWeight:210 RetIndex:1609

CompName:7-Tetradecenal, (Z)- \$\$ Z-7-Tetradecenal \$\$ (7Z)-7-Tetradecenal #

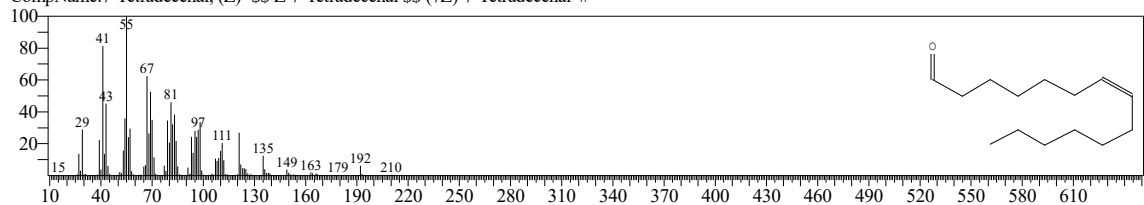

Hit#:2 Entry:92244 Library:NIST20M1.lib

SI:87 Formula:C16H30O CAS:56219-04-6 MolWeight:238 RetIndex:1808

CompName:cis-9-Hexadecenal \$\$ 9-Hexadecenal, (Z)- \$\$ (Z)-9-Hexadecenal \$\$ (9Z)-9-Hexadecenal #

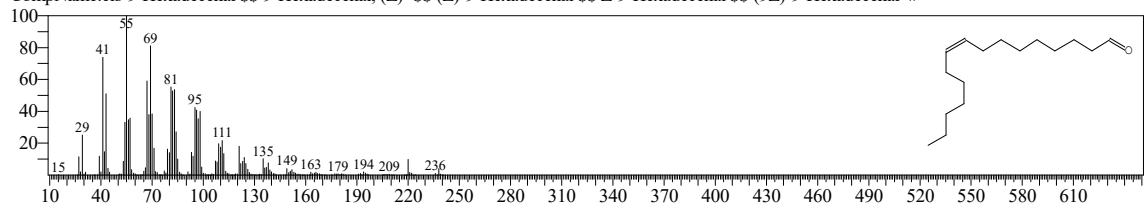

Hit#:3 Entry:205575 Library:NIST20M1.lib

SI:87 Formula:C22H40O2 CAS:69502-96-1 MolWeight:336 RetIndex:2453

CompName:2H-Pyran, 2-(2-heptadecynyloxy)tetrahydro- \$\$ 2-(2-Heptadecynyloxy)tetrahydro-2H-pyran #

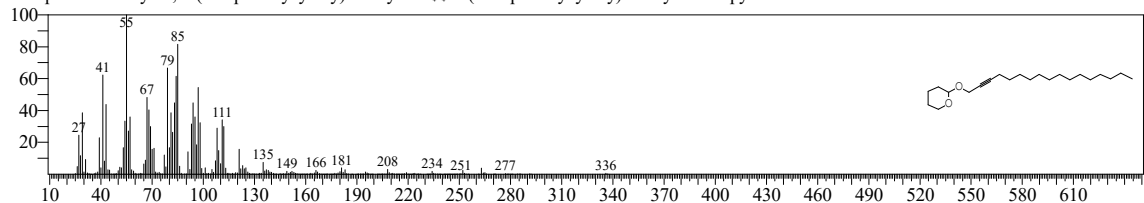

Hit#:4 Entry:90001 Library:NIST20M1.lib

SI:87 Formula:C16H28O CAS:37609-25-9 MolWeight:236 RetIndex:2072

CompName:5-Cyclohexadecen-1-one \$\$ 5-Cyclohexadecenone

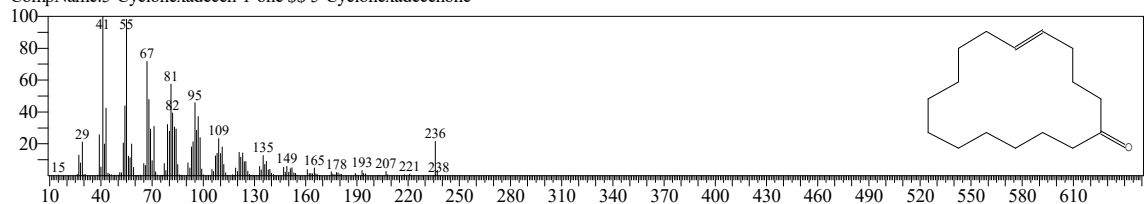

Hit#:5 Entry:123421 Library:NIST20M1.lib

SI:86 Formula:C18H34O CAS:2423-10-1 MolWeight:266 RetIndex:2007

CompName:9-Octadecenal, (Z)- \$\$ Olealdehyde \$\$ cis-9-Octadecenal \$\$ Oleylaldehyde \$\$ Z-9-Octadecenal \$\$ (9Z)-9-Octadecenal #

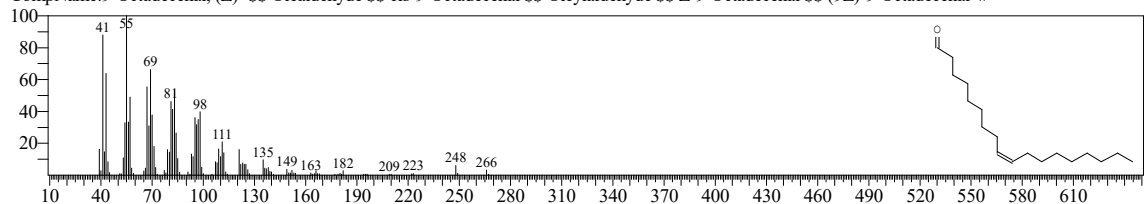



# TNAU

<< Target >>

Line#:16 R.Time:32.035(Scan#:5408) MassPeaks:382

RawMode:Averaged 32.030-32.040(5407-5409) BasePeak:73.05(1324)

BG Mode:Calc. from Peak Group 1 - Event 1 Q3 Scan

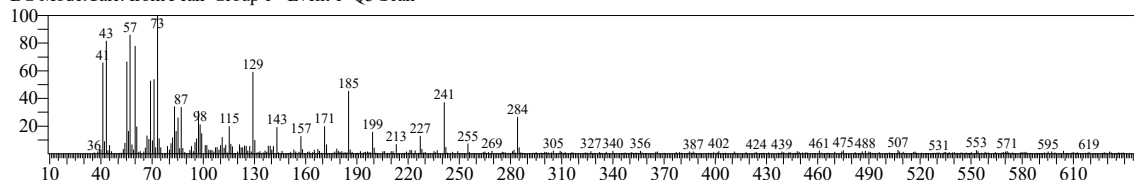

Hit#:1 Entry:34462 Library:NIST20R.lib

SI:91 Formula:C18H36O2 CAS:57-11-4 MolWeight:284 RetIndex:2167

CompName:Octadecanoic acid \$\$ Stearic acid \$\$ n-Octadecanoic acid \$\$ Humko Industriene R \$\$ Hydrofol Acid 150 \$\$ Hystrene S-97 \$\$ Hystrene T-70 \$

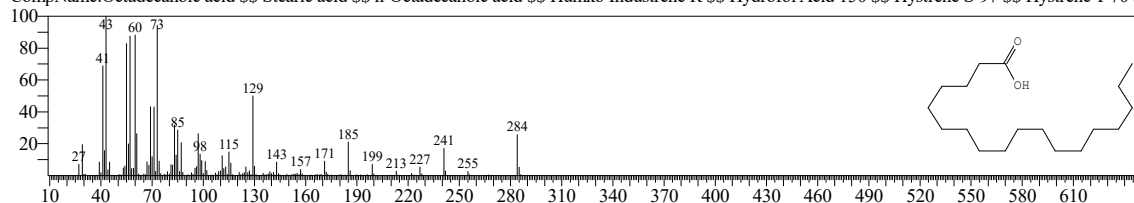

Hit#:2 Entry:29890 Library:NIST20R.lib

SI:88 Formula:C15H30O2 CAS:1002-84-2 MolWeight:242 RetIndex:1869

CompName:Pentadecanoic acid \$\$ Pentadecylic acid \$\$ n-Pentadecanoic acid \$\$ n-Pentadecylic acid

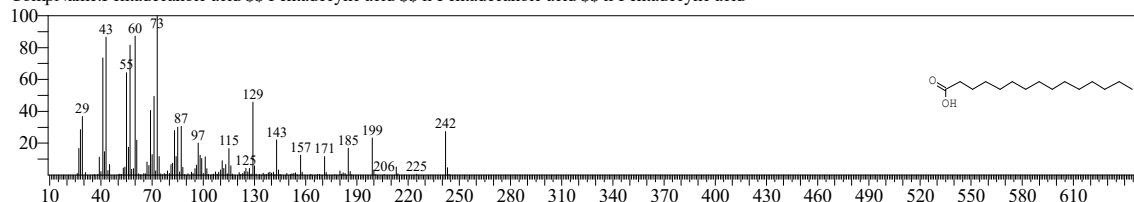

Hit#:3 Entry:31599 Library:NIST20R.lib

SI:88 Formula:C16H32O2 CAS:57-10-3 MolWeight:256 RetIndex:1968

CompName:n-Hexadecanoic acid \$\$ Hexadecanoic acid \$\$ n-Hexadecic acid \$\$ Palmitic acid \$\$ Pentadecanecarboxylic acid \$\$ 1-Pentadecanecarboxylic

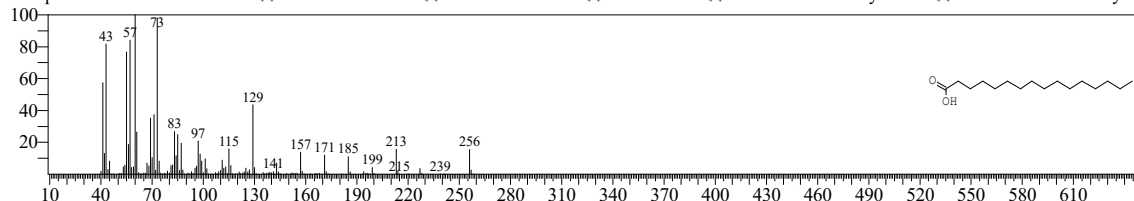

Hit#:4 Entry:36904 Library:NIST20R.lib

SI:87 Formula:C20H40O2 CAS:506-30-9 MolWeight:312 RetIndex:2366

CompName:Eicosanoic acid \$\$ Arachic acid \$\$ Arachidic acid \$\$ Icosanoic acid \$\$ n-Eicosanoic acid \$\$ Arachidic acid (synthetic)

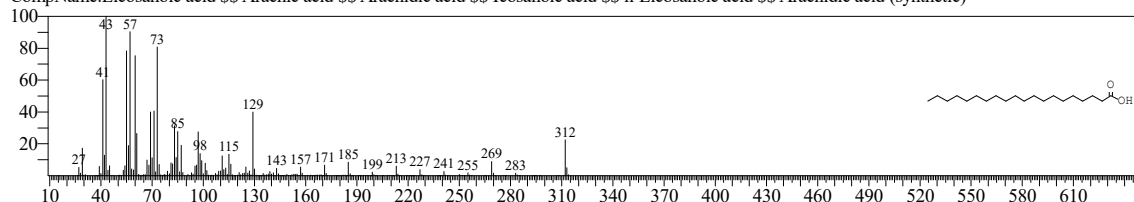

Hit#:5 Entry:81713 Library:NIST20M1.lib

SI:87 Formula:C14H28O2 CAS:544-63-8 MolWeight:228 RetIndex:1769

CompName:Tetradecanoic acid \$\$ Myristic acid \$\$ n-Tetradecanoic acid \$\$ n-Tetradecic acid \$\$ Neo-Fat 14 \$\$ Univol U 316S \$\$ 1-Tridecanecarboxylic ;

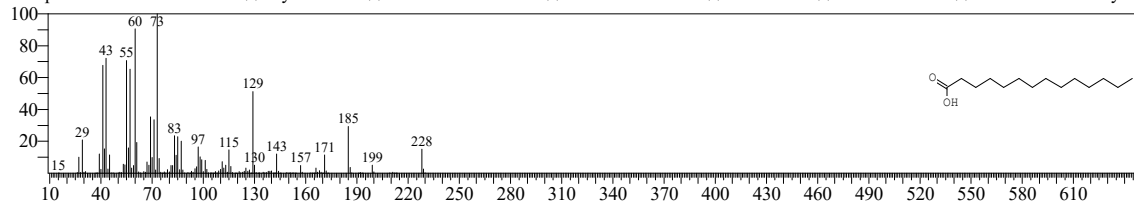

# TNAU

<< Target >>

Line#:17 R.Time:44.770(Scan#:7955) MassPeaks:275

RawMode:Averaged 44.765-44.775(7954-7956) BasePeak:69.05(1689)

BG Mode:Calc. from Peak Group 1 - Event 1 Q3 Scan

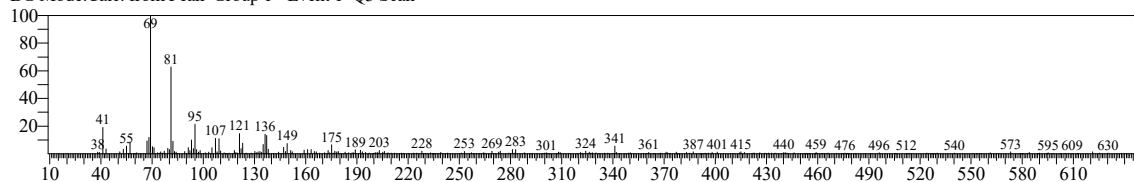

Hit#:1 Entry:41861 Library:NIST20R.lib

SI:90 Formula:C30H50 CAS:111-02-4 MolWeight:410 RetIndex:2914

CompName:Squalene \$\$ 2,6,10,14,18,22-Tetracosahexaene, 2,6,10,15,19,23-hexamethyl-, (all-E)- \$\$ all-trans-Squalene \$\$ trans-Squalene \$\$ Spinacene \$\$ S

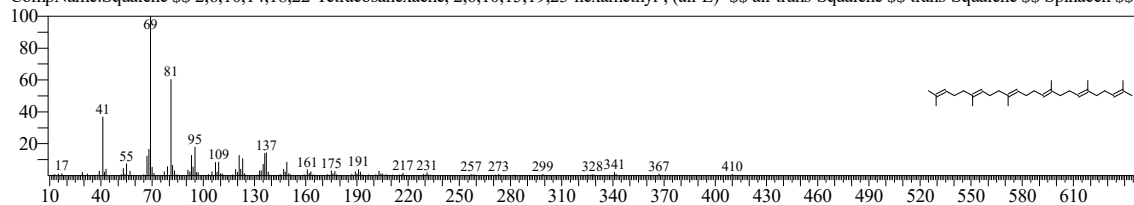

Hit#:2 Entry:6115 Library:NIST20M2.lib

SI:87 Formula:C30H50 CAS:7683-64-9 MolWeight:410 RetIndex:2914

CompName:Supraene \$\$ 2,6,10,14,18,22-Tetracosahexaene, 2,6,10,15,19,23-hexamethyl- \$\$ Spinacene \$\$ 2,6,10,15,19,23-Hexamethyl-2,6,10,14,18,22-te

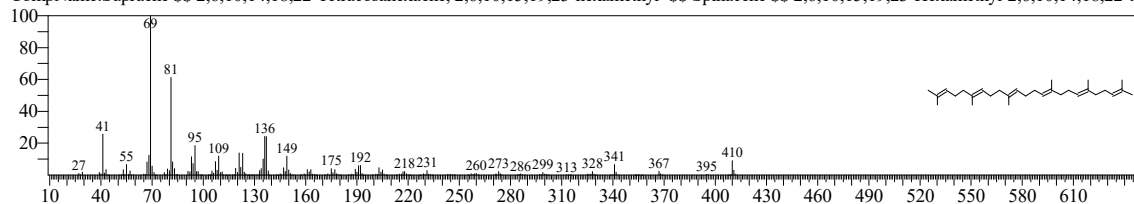

Hit#:3 Entry:43394 Library:NIST20R.lib

SI:87 Formula:C40H66 CAS:502-62-5 MolWeight:546 RetIndex:3878

CompName:psi.,psi.-Carotene, 7,7',8,8',11,11',12,12',15,15'-decahydro- \$\$ 2,6,10,14,18,22,26,30-Dotriacontaoctene, 2,6,10,14,19,23,27,31-octamethyl- \$

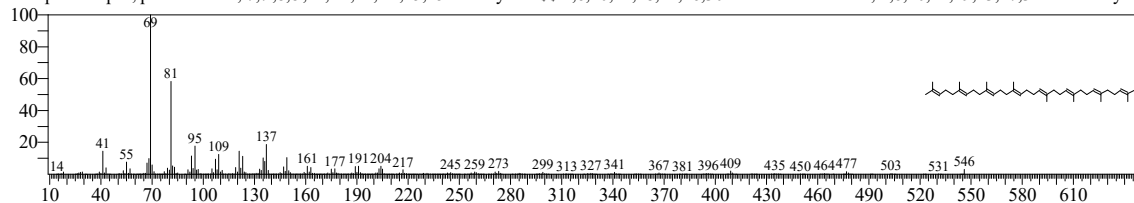

Hit#:4 Entry:21778 Library:NIST20M2.lib

SI:86 Formula:C30H54O2 CAS:0-00-0 MolWeight:446 RetIndex:3127

CompName:2,6,10,15,19,23-Pentamethyl-2,6,18,22-tetracosatetraen-10,15-diol

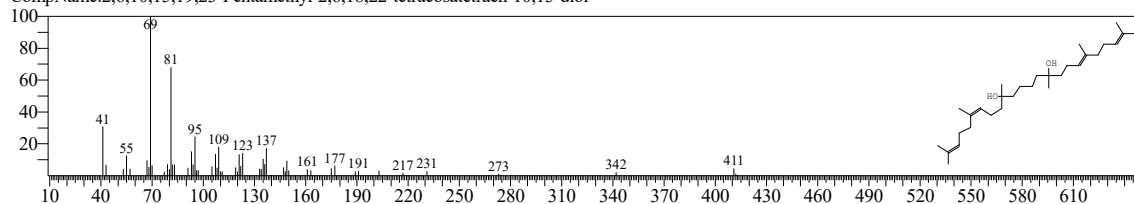

Hit#:5 Entry:212569 Library:NIST20M1.lib

SI:86 Formula:C25H42 CAS:75581-03-2 MolWeight:342 RetIndex:2432

CompName:2,6,10,14,18-Pentamethyl-2,6,10,14,18-eicosapentaene \$\$ (6E,10E,14E,18E)-2,6,10,14,18-Pentamethyl-2,6,10,14,18-icosapentaene #

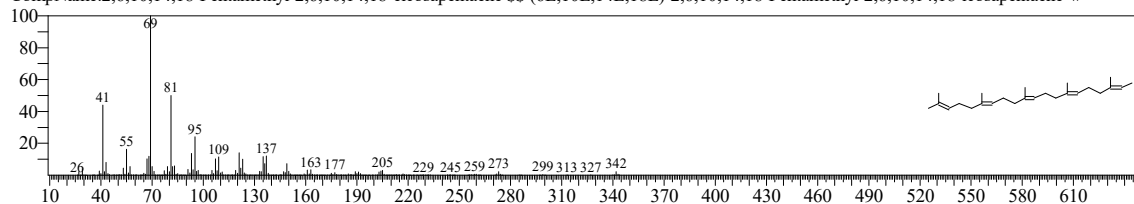

# TNAU

<< Target >>

Line#:18 R.Time:45.605(Scan#:8122) MassPeaks:374

RawMode:Averaged 45.600-45.610(8121-8123) BasePeak:139.10(7893)

BG Mode:Calc. from Peak Group 1 - Event 1 Q3 Scan

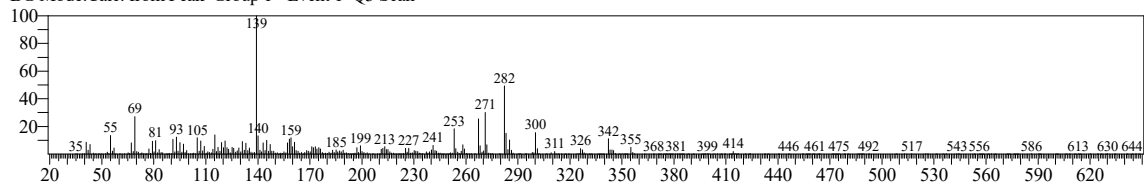

Hit#:1 Entry:8297 Library:NIST20M2.lib

SI:90 Formula:C27H42O3 CAS:512-04-9 MolWeight:414 RetIndex:2844

CompName:Diosgenin \$\$ Spirost-5-en-3-ol, (3.beta.,25R)- \$\$ Spirost-5-en-3.beta.-ol, (25R)- \$\$ Nitrogenin \$\$ 25D-spirost-5-en-3.beta.-ol \$\$ Spiro(8H-naph

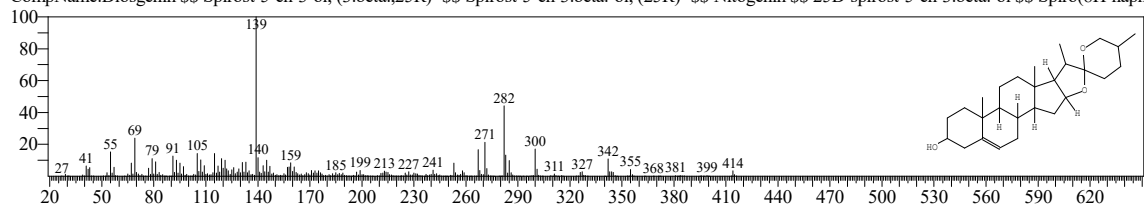

Hit#:2 Entry:14852 Library:NIST20M2.lib

SI:82 Formula:C28H44O3 CAS:116292-24-1 MolWeight:428 RetIndex:2793

CompName:Diosgenin methyl ether \$\$ Diosgenin Me derivative \$\$ (3.beta.,25R)-3-Methoxyspirost-5-ene \$\$ Spirost-5-ene, 3-methoxy-, (3.beta.,25R)-

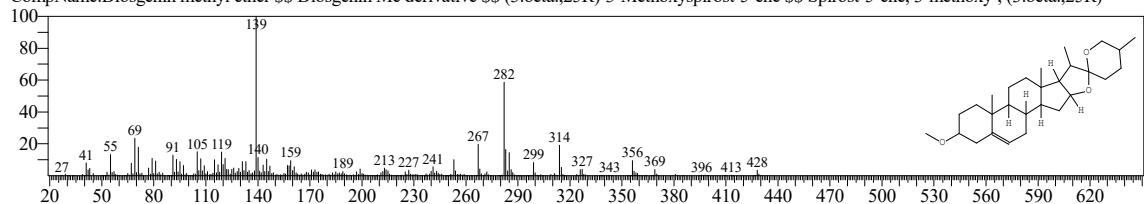

Hit#:3 Entry:41561 Library:NIST20R.lib

SI:80 Formula:C27H42O2 CAS:32277-73-9 MolWeight:398 RetIndex:2713

CompName:Des-N-solasodine \$\$ Furosta-5,20(22)-dien-3-ol #

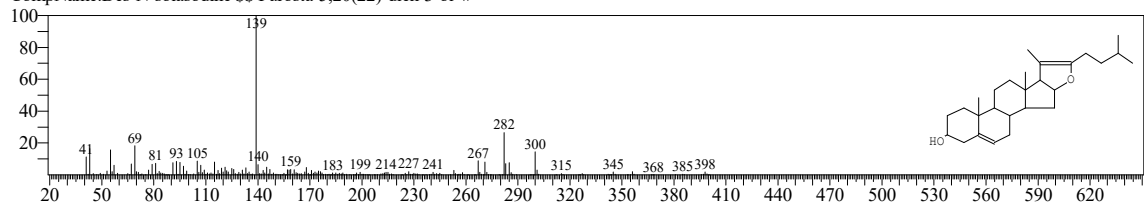

Hit#:4 Entry:24878 Library:NIST20M2.lib

SI:79 Formula:C29H44O4 CAS:1061-54-7 MolWeight:456 RetIndex:2984

CompName:Spirost-5-en-3-ol, acetate, (3.beta.,25R)- \$\$ Diosgenin acetate \$\$ Spirost-5-en-3.beta.-ol, acetate, (25R)- \$\$ Spirost-5-en-3.beta.-ol, acetate, (25R)-

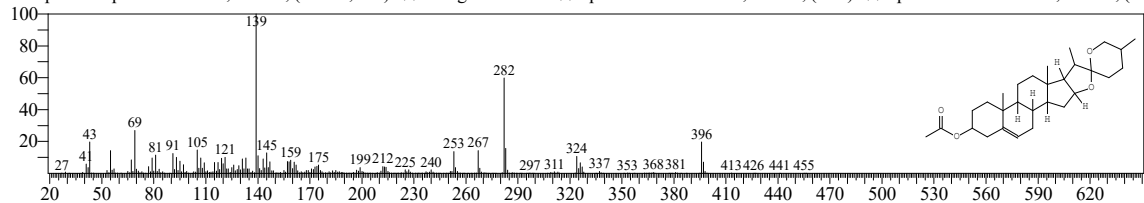

Hit#:5 Entry:42677 Library:NIST20R.lib

SI:74 Formula:C29H44O4 CAS:1180-12-7 MolWeight:456 RetIndex:2984

CompName:Neodiosgenin (3.beta.,25S) acetate \$\$ Spirost-5-en-3-ol, 3-acetate, (3.beta.,25S)- \$\$ Spirost-5-en-3-ol, acetate, (3.beta.,25S)- \$\$ Spirost-5-en-3-ol, acetate, (3.beta.,25S)-

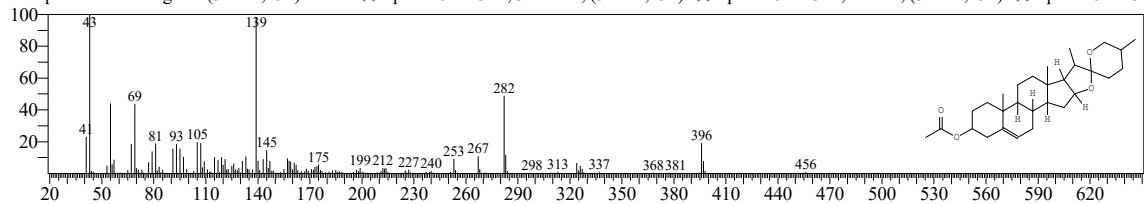

Supplement: Supplementary file 15 [file supplementary]
