# Supplementary material for: Comparative Metabolomics Profiling Reveals Key Metabolites and Associated Pathways Regulating Tuber Dormancy in White Yam (<em>Dioscorea rotundata</em>)
Source: Preprints.org preprint supplement (doi:10.20944/preprints202303.0378.v1), 2023-03-21

# TNAU

## Sample Information

Analyzed by : Admin  
 Analyzed : 02-Sep-22 8:50:35 PM  
 Sample Type : Unknown  
 Level # : 1  
 Sample Name : Sample  
 Sample ID : 11-1  
 IS Amount : [1]=1  
 Sample Amount : 1  
 Dilution Factor : 1  
 Vial # : 12  
 Injection Volume : 5.00  
 Data File : D:\GCMS-8040NX\Sep 2022\Users\01.09.2022\01092022032.qgd  
 Org Data File : D:\GCMS-8040NX\Sep 2022\Users\01.09.2022\01092022032.qgd  
 Method File : D:\GCMS-8040NX\Sep 2022\Method\Scan\_methodfile.qgm  
 Org Method File : D:\GCMS-8040NX\Sep 2022\Method\Scan\_methodfile.qgm  
 Report File :  
 Tuning File : D:\GCMS-8040NX\Aug 2022\Tuning Data\TUNING 25082022.qgt  
 Modified by : Admin  
 Modified : 05-Sep-22 11:11:08 AM

Chromatogram Sample D:\GCMS-8040NX\Sep 2022\Users\01.09.2022\01092022032.qgd

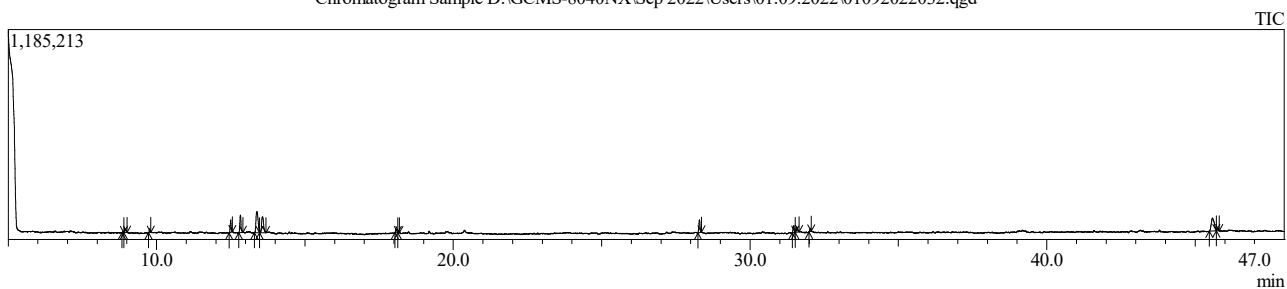

## Peak Report TIC

| Peak# | R.Time | Area    | Area%  | Height | Height% | A/H  | Similarity | Name                                  |
|-------|--------|---------|--------|--------|---------|------|------------|---------------------------------------|
| 1     | 8.860  | 18697   | 0.71   | 6915   | 0.99    | 2.70 | 46         | Methyl butanoate                      |
| 2     | 8.938  | 77945   | 2.95   | 22599  | 3.25    | 3.45 | 82         | 1-Butanol, 3-methyl-, acetate         |
| 3     | 9.770  | 44187   | 1.67   | 20828  | 2.99    | 2.12 | 94         | Pentasiloxane, dodecamethyl-          |
| 4     | 12.498 | 168908  | 6.39   | 69606  | 10.01   | 2.43 | 73         | 2,5-Cyclohexadiene-1,4-dione, dioxime |
| 5     | 12.823 | 267649  | 10.13  | 99414  | 14.29   | 2.69 | 73         | 2,5-Cyclohexadiene-1,4-dione, dioxime |
| 6     | 13.380 | 572820  | 21.68  | 118713 | 17.07   | 4.83 | 53         | Methyl cis-13,16-Docosadienate        |
| 7     | 13.568 | 412452  | 15.61  | 88974  | 12.79   | 4.64 | 53         | Methyl cis-13,16-Docosadienate        |
| 8     | 18.075 | 68498   | 2.59   | 20629  | 2.97    | 3.32 | 90         | .beta.-D-Glucopyranose, 1,6-anhydro-  |
| 9     | 18.145 | 10347   | 0.39   | 6341   | 0.91    | 1.63 | 18         | Methyl laurate                        |
| 10    | 28.294 | 192212  | 7.27   | 72981  | 10.49   | 2.63 | 94         | n-Hexadecanoic acid                   |
| 11    | 31.469 | 117442  | 4.44   | 39482  | 5.68    | 2.97 | 95         | (9E,11E)-Octadecadienoic acid         |
| 12    | 31.575 | 90920   | 3.44   | 29053  | 4.18    | 3.13 | 87         | cis-9-Hexadecenal                     |
| 13    | 32.030 | 42745   | 1.62   | 18671  | 2.68    | 2.29 | 91         | Octadecanoic acid                     |
| 14    | 45.582 | 515778  | 19.52  | 72975  | 10.49   | 7.07 | 89         | Diosgenin                             |
| 15    | 45.785 | 41707   | 1.58   | 8398   | 1.21    | 4.97 | 70         | Tetracosamethyl-cyclododecasiloxane   |
|       |        | 2642307 | 100.00 | 695579 | 100.00  |      |            |                                       |

Library

# TNAU

<< Target >>

Line#:1 R.Time:8.860(Scan#:773) MassPeaks:351

RawMode:Averaged 8.855-8.865(772-774) BasePeak:43.05(444)

BG Mode:Calc. from Peak Group 1 - Event 1 Q3 Scan

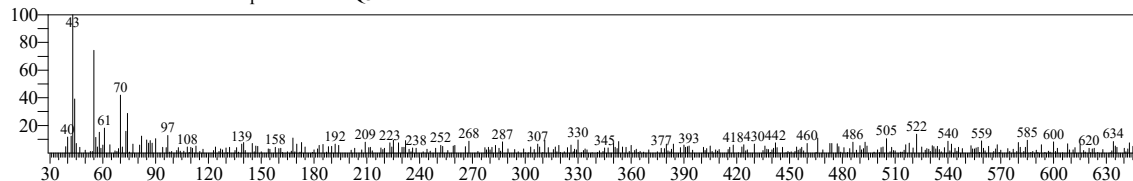

Hit#:1 Entry:1 Library:FA\_ME\_SP2560\_EI\_V3.lib

SI:46 Formula:C5H10O2 CAS:107-92-6 MolWeight:102 RetIndex:1113

CompName:Methyl butanoate ; Butanoic acid

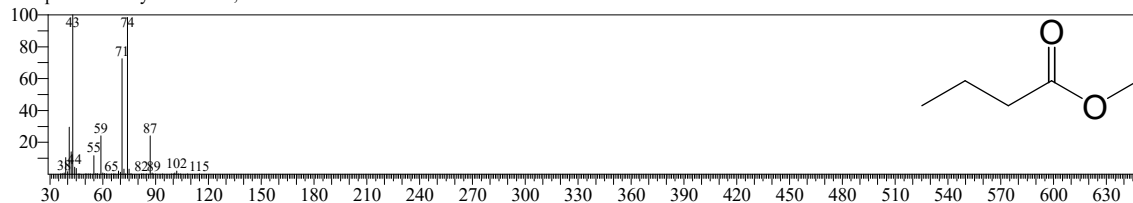

Hit#:2 Entry:2 Library:FA\_ME\_SP2560\_EI\_V3.lib

SI:43 Formula:C7H14O2 CAS:142-62-1 MolWeight:130 RetIndex:1332

CompName:Methyl caproate ; Hexanoic acid

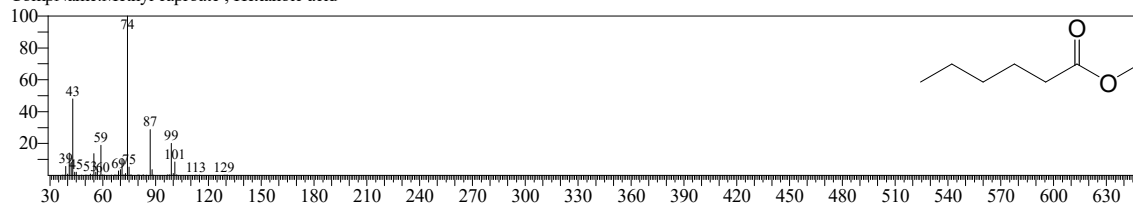

Hit#:3 Entry:3 Library:FA\_ME\_SP2560\_EI\_V3.lib

SI:40 Formula:C9H18O2 CAS:124-07-2 MolWeight:158 RetIndex:1550

CompName:Methyl caprylate ; Octanoic acid

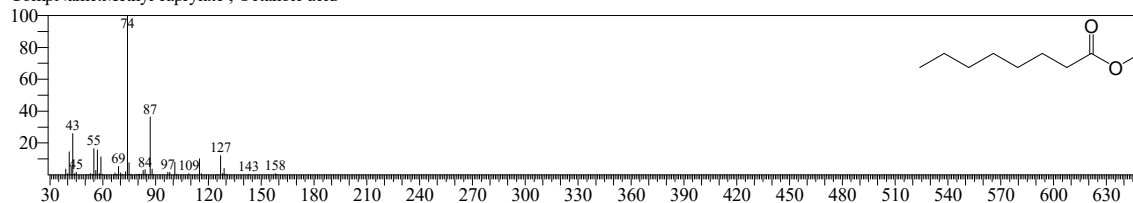

Hit#:4 Entry:4 Library:FA\_ME\_SP2560\_EI\_V3.lib

SI:39 Formula:C11H22O2 CAS:334-48-5 MolWeight:186 RetIndex:1767

CompName:Methyl caprate ; Decanoic acid

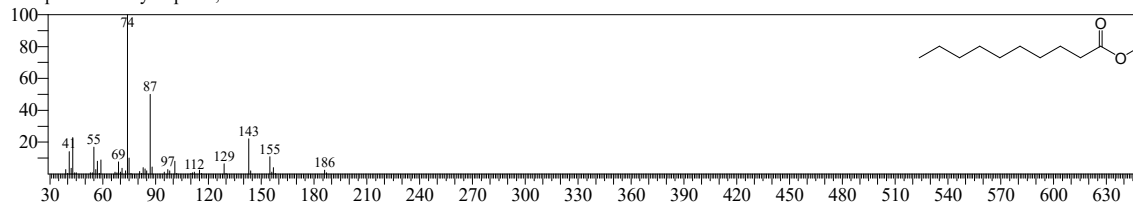

Hit#:5 Entry:78 Library:OA\_TMS\_DB5\_67min\_V3.lib

SI:38 Formula:C7H15NO3Si CAS:543-24-8 MolWeight:189 RetIndex:1280

CompName:Acetyl glycine-TMS ; 2-acetamidoacetic acid

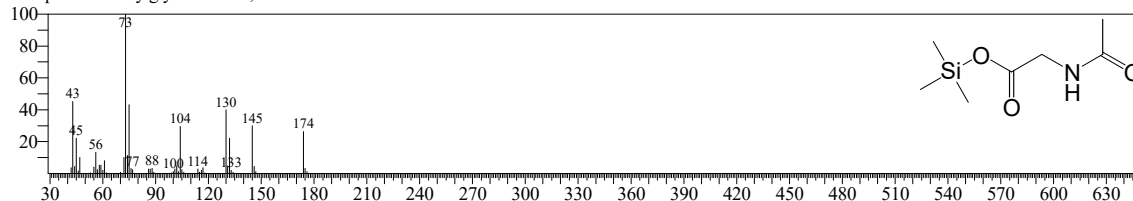

# TNAU

<< Target >>

Line# 2 R.Time: 8.940 (Scan#: 789) MassPeaks: 331

RawMode: Averaged 8.935-8.945 (788-790) BasePeak: 43.05 (3527)

BG Mode: Calc. from Peak Group 1 - Event 1 Q3 Scan

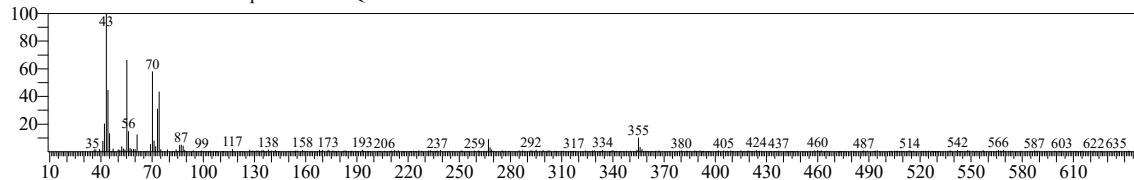

Hit#: 1 Entry: 6784 Library: NIST20R.lib

SI: 82 Formula: C<sub>7</sub>H<sub>14</sub>O<sub>2</sub> CAS: 123-92-2 MolWeight: 130 RetIndex: 820

CompName: 1-Butanol, 3-methyl-, acetate \$\$ Isopentyl alcohol, acetate \$\$ Acetic acid, 3-methylbutyl ester \$\$ Banana oil \$\$ Isoamyl acetate \$\$ Isoamyl etha

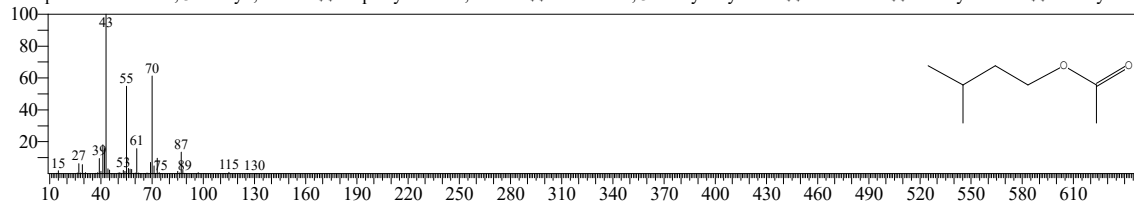

Hit#: 2 Entry: 8685 Library: NIST20M1.lib

SI: 79 Formula: C<sub>7</sub>H<sub>14</sub>O<sub>2</sub> CAS: 628-63-7 MolWeight: 130 RetIndex: 884

CompName: Acetic acid, pentyl ester \$\$ n-Amyl acetate \$\$ n-Pentyl acetate \$\$ Amyl acetate \$\$ Birnenöl \$\$ Pentyl acetate \$\$ Acetic acid, amyl ester \$\$ Arr

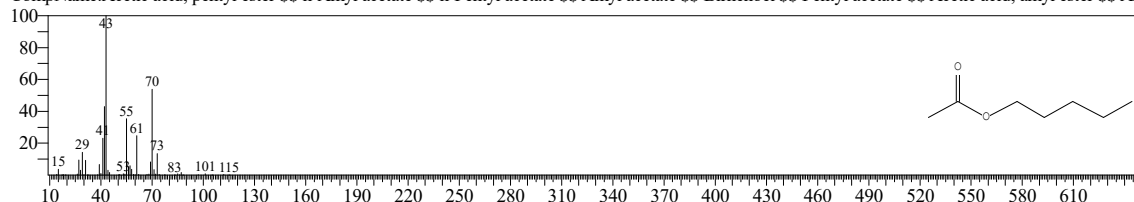

Hit#: 3 Entry: 6819 Library: NIST20R.lib

SI: 78 Formula: C<sub>7</sub>H<sub>14</sub>O<sub>2</sub> CAS: 624-41-9 MolWeight: 130 RetIndex: 820

CompName: 1-Butanol, 2-methyl-, acetate \$\$ 2-Methyl-1-butyl acetate \$\$ 2-Methylbutyl acetate \$\$ Acetic acid 2-methylbutyl ester \$\$ 2-Methylbutyl acetate :

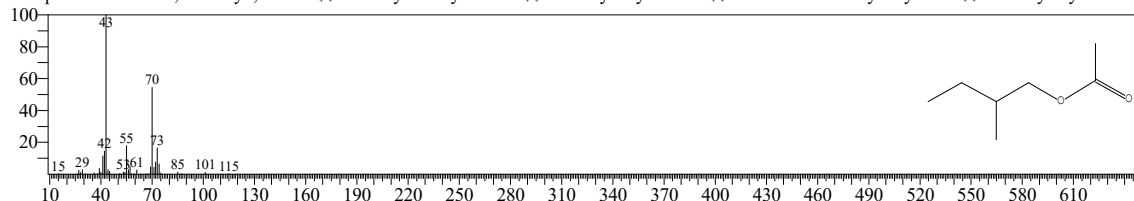

Hit#: 4 Entry: 5225 Library: NIST20M1.lib

SI: 77 Formula: C<sub>4</sub>H<sub>6</sub>O<sub>4</sub> CAS: 17675-99-9 MolWeight: 118 RetIndex: 1201

CompName: 2-Furanone, 3,4-dihydroxytetrahydro \$\$ 3,4-Dihydroxydihydro-2(3H)-furanone #

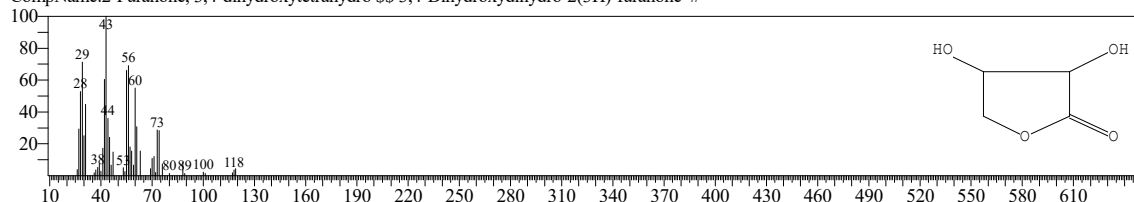

Hit#: 5 Entry: 4411 Library: NIST20R.lib

SI: 77 Formula: C<sub>6</sub>H<sub>12</sub>O<sub>2</sub> CAS: 110-45-2 MolWeight: 116 RetIndex: 818

CompName: 1-Butanol, 3-methyl-, formate \$\$ Isopentyl alcohol, formate \$\$ Isoamyl formate \$\$ Isoamyl methanoate \$\$ Isopentyl formate \$\$ 3-Methylbutyl

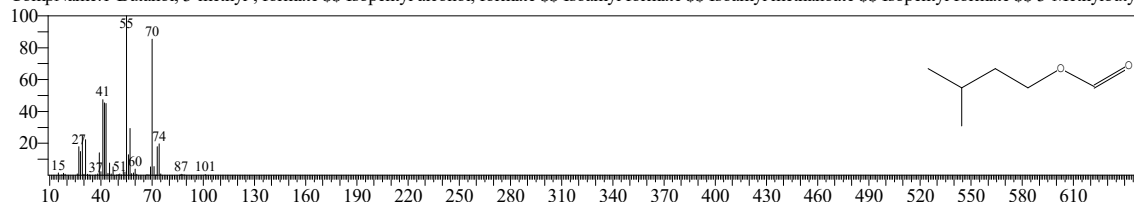

# TNAU

<< Target >>

Line#3 R.Time:9.770(Scan#:955) MassPeaks:327

RawMode:Averaged 9.765-9.775(954-956) BasePeak:281.00(5021)

BG Mode:Calc. from Peak Group 1 - Event 1 Q3 Scan

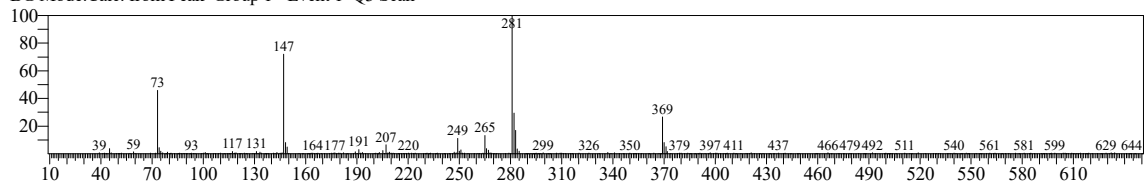

Hit#1 Entry:40975 Library:NIST20R.lib

SI:94 Formula:C<sub>12</sub>H<sub>36</sub>O<sub>4</sub>Si<sub>5</sub> CAS:141-63-9 MolWeight:384 RetIndex:1068

CompName:Pentasiloxane, dodecamethyl- \$\$ Dodecamethylpentasiloxane \$\$ 1,1,1,3,3,5,5,7,7,9,9-Dodecamethylpentasiloxane #

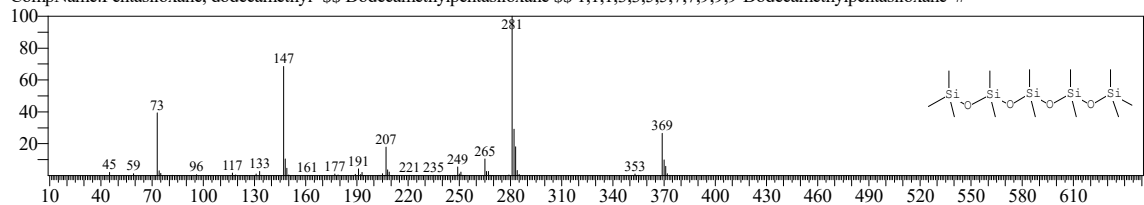

Hit#2 Entry:249272 Library:NIST20M1.lib

SI:84 Formula:C<sub>12</sub>H<sub>36</sub>O<sub>4</sub>Si<sub>5</sub> CAS:3555-47-3 MolWeight:384 RetIndex:1068

CompName:Trisiloxane, 1,1,1,5,5,5-hexamethyl-3,3-bis[(trimethylsilyl)oxy]- \$\$ Tetrakis(trimethylsiloxy)silane \$\$ Trisiloxane, 1,1,1,5,5,5-hexamethyl-3,3-b

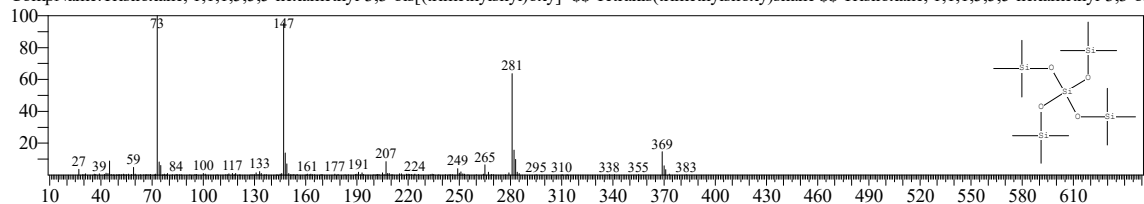

Hit#3 Entry:27848 Library:NIST20M2.lib

SI:82 Formula:C<sub>18</sub>H<sub>48</sub>O<sub>4</sub>Si<sub>5</sub> CAS:0-00-0 MolWeight:468 RetIndex:1495

CompName:1,3,5,7,9-Pentasiloxane, 1,1,3,3,5,5,7,7,9,9-decamethyl-1,9-di(tert.butyl)-

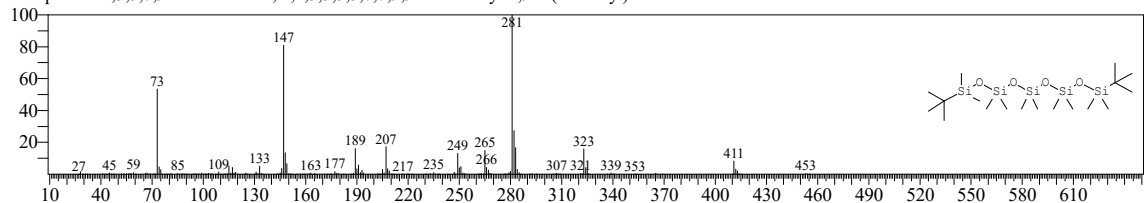

Hit#4 Entry:249271 Library:NIST20M1.lib

SI:78 Formula:C<sub>12</sub>H<sub>36</sub>O<sub>4</sub>Si<sub>5</sub> CAS:38146-99-5 MolWeight:384 RetIndex:1068

CompName:1,1,1,3,3,5,5,7,7-Nonamethyl-3-(trimethylsiloxy)tetrasiloxane \$\$ 1,1,1,3,3,5,5,7,7-Nonamethyl-5-[(trimethylsilyl)oxy]tetrasiloxane #

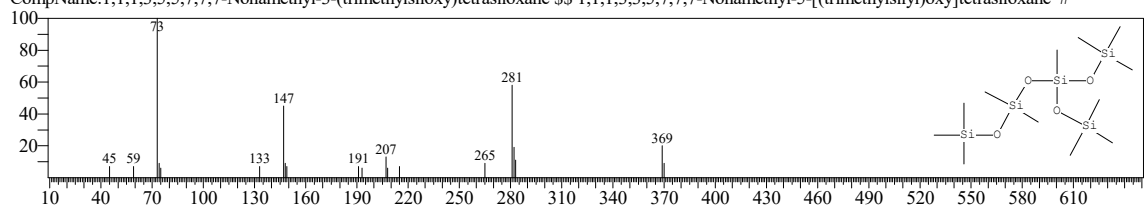

Hit#5 Entry:158097 Library:NIST20M1.lib

SI:76 Formula:C<sub>14</sub>H<sub>24</sub>O<sub>3</sub>Si<sub>2</sub> CAS:0-00-0 MolWeight:296 RetIndex:1625

CompName:2,6-Dihydroxyacetophenone, 2TMS derivative \$\$ 2',6'-Dihydroxyacetophenone, bis(trimethylsilyl) ether

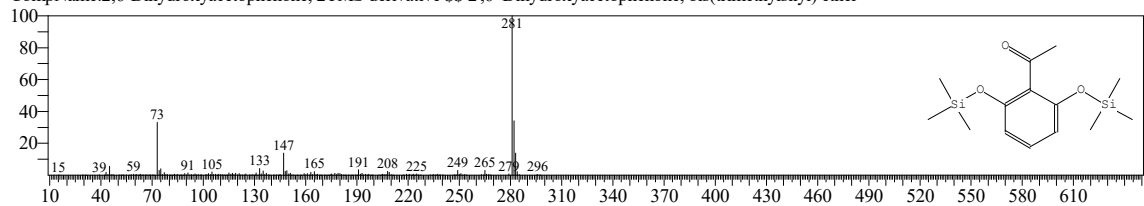

# TNAU

<< Target >>

Line#:4 R.Time:12.495(Scan#:1500) MassPeaks:373

RawMode:Averaged 12.490-12.500(1499-1501) BasePeak:138.05(24111)

BG Mode:Calc. from Peak Group 1 - Event 1 Q3 Scan

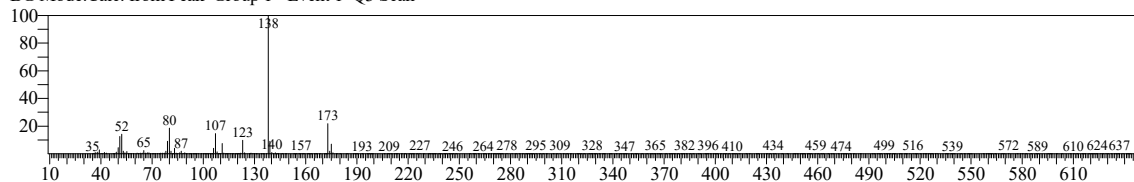

Hit#:1 Entry:8360 Library:NIST20R.lib

SI:73 Formula:C6H6N2O2 CAS:105-11-3 MolWeight:138 RetIndex:1349

CompName:2,5-Cyclohexadiene-1,4-dione, dioxime \$\$ p-Benzoquinone, dioxime \$\$ p-Quinone dioxime \$\$ p-Quinone oxime \$\$ Benzoquinone dioxime \$\$

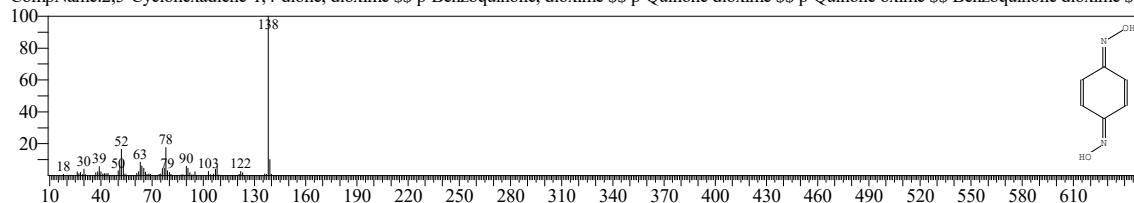

Hit#:2 Entry:137 Library:OA TMS\_DB5\_67min\_V3.lib

SI:33 Formula:C9H14N2OSi CAS:98-92-0 MolWeight:194 RetIndex:1486

CompName:Niacinamide-TMS ; pyridine-3-carboxamide

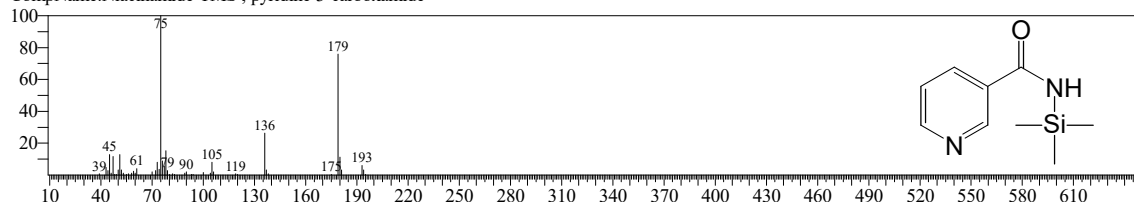

Hit#:3 Entry:34 Library:FA\_ME\_SP2560\_EI\_V3.lib

SI:33 Formula:C23H42O2 CAS:7370-49-2 MolWeight:350 RetIndex:3169

CompName:Methyl cis-13,16-Docosadienate ; (13Z,16E)-docosa-13,16-dienoic acid

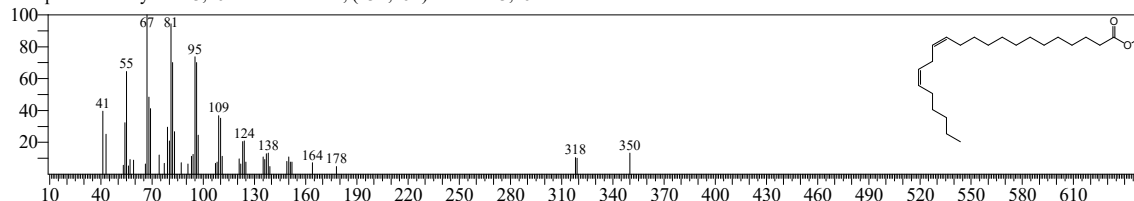

Hit#:4 Entry:21 Library:FA\_ME\_SP2560\_EI\_V3.lib

SI:32 Formula:C19H34O2 CAS:60-33-3 MolWeight:294 RetIndex:2775

CompName:Methyl linoleate ; Octadeca-9,12-dienoic acid

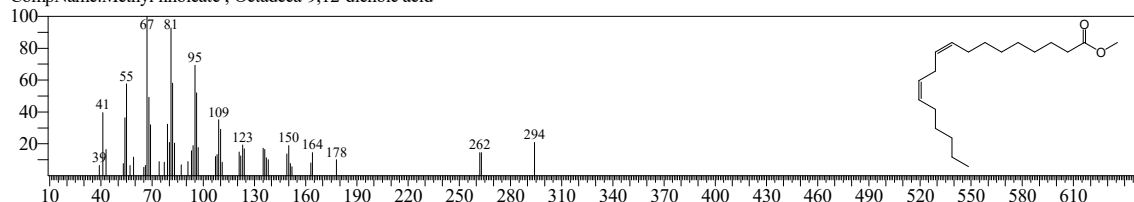

Hit#:5 Entry:20 Library:FA\_ME\_SP2560\_EI\_V3.lib

SI:32 Formula:C19H34O2 CAS:506-21-8 MolWeight:294 RetIndex:2727

CompName:Methyl linoleidate ; (9E,12E)-octadeca-9,12-dienoic acid

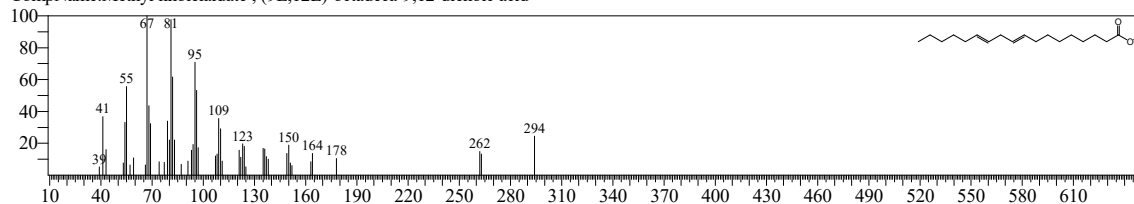

# TNAU

<< Target >>

Line#5 R.Time:12.825(Scan#:1566) MassPeaks:323

RawMode:Averaged 12.820-12.830(1565-1567) BasePeak:138.05(35098)

BG Mode:Calc. from Peak Group 1 - Event 1 Q3 Scan

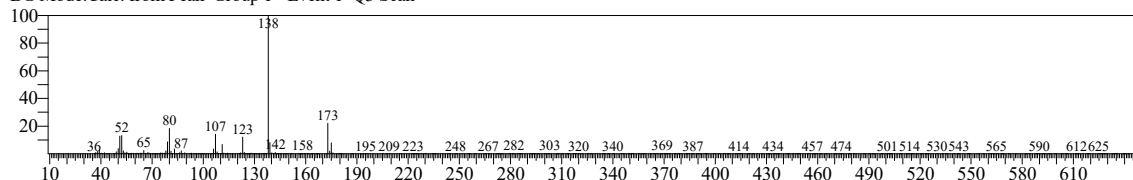

Hit#:1 Entry:8360 Library:NIST20R.lib

SI:73 Formula:C6H6N2O2 CAS:105-11-3 MolWeight:138 RetIndex:1349

CompName:2,5-Cyclohexadiene-1,4-dione, dioxime \$\$ p-Benzoquinone, dioxime \$\$ p-Quinone dioxime \$\$ p-Quinone oxime \$\$ Benzoquinone dioxime \$\$

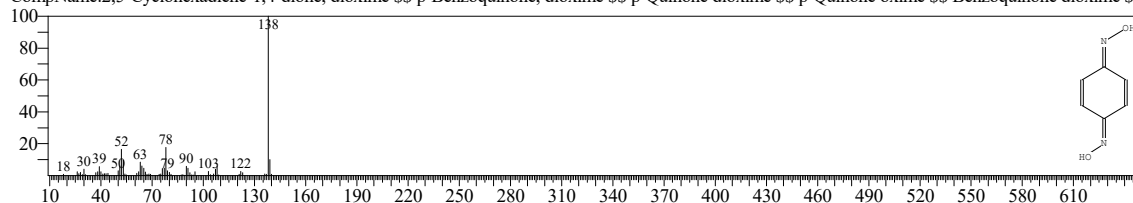

Hit#:2 Entry:11222 Library:NIST20M1.lib

SI:71 Formula:C7H10N2O CAS:3471-32-7 MolWeight:138 RetIndex:1325

CompName:Hydrazine, (4-methoxyphenyl)- \$\$ (p-Methoxyphenyl)hydrazine \$\$ 1-(4-Methoxyphenyl)hydrazine #

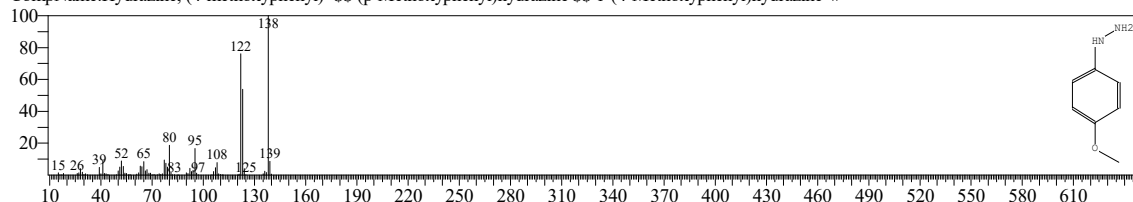

Hit#:3 Entry:25 Library:FA\_ME\_SP2560\_EI\_V3.lib

SI:34 Formula:C19H32O2 CAS:463-40-1 MolWeight:292 RetIndex:2892

CompName:Methyl linolenate ; (9Z,12Z,15Z)-octadeca-9,12,15-trienoic acid

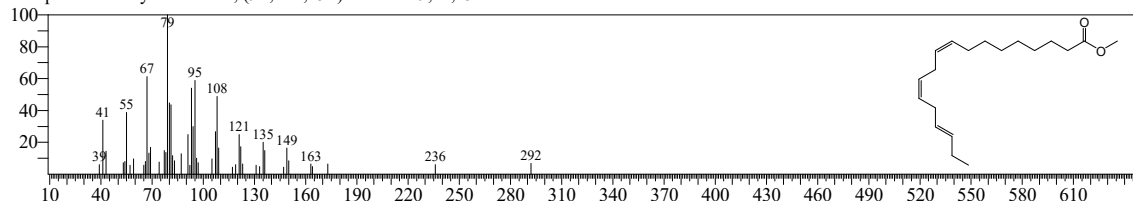

Hit#:4 Entry:21 Library:FA\_ME\_SP2560\_EI\_V3.lib

SI:34 Formula:C19H34O2 CAS:60-33-3 MolWeight:294 RetIndex:2775

CompName:Methyl linoleate ; Octadeca-9,12-dienoic acid

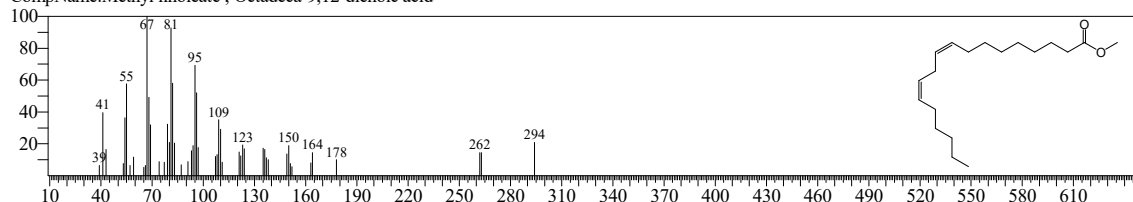

Hit#:5 Entry:34 Library:FA\_ME\_SP2560\_EI\_V3.lib

SI:33 Formula:C23H42O2 CAS:7370-49-2 MolWeight:350 RetIndex:3169

CompName:Methyl cis-13,16-Docosadienate ; (13Z,16E)-docosa-13,16-dienoic acid

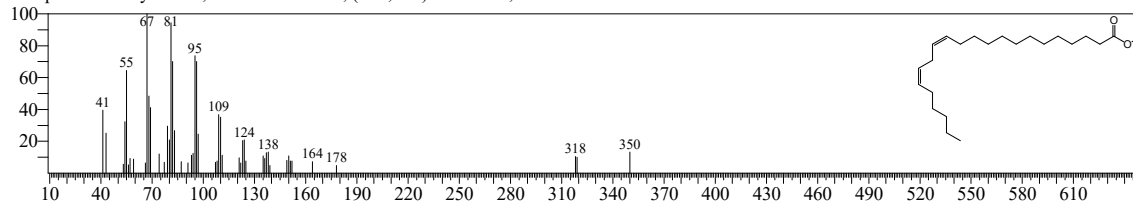

# TNAU

<< Target >>

Line#:6 R.Time:13.380(Scan#:1677) MassPeaks:341

RawMode:Averaged 13.375-13.385(1676-1678) BasePeak:155.05(19371)

BG Mode:Calc. from Peak Group 1 - Event 1 Q3 Scan

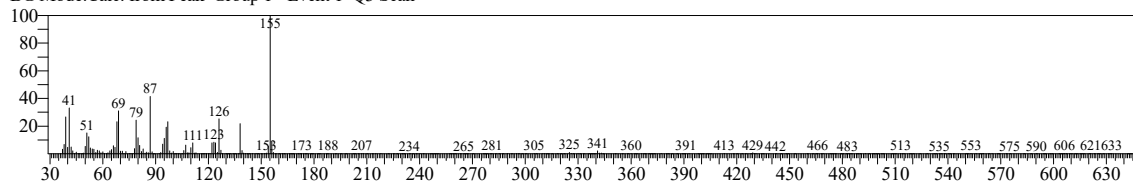

Hit#:1 Entry:34 Library:FA\_ME\_SP2560\_EI\_V3.lib

SI:53 Formula:C23H42O2 CAS:7370-49-2 MolWeight:350 RetIndex:3169

CompName:Methyl cis-13,16-Docosadienate ; (13Z,16E)-docosa-13,16-dienoic acid

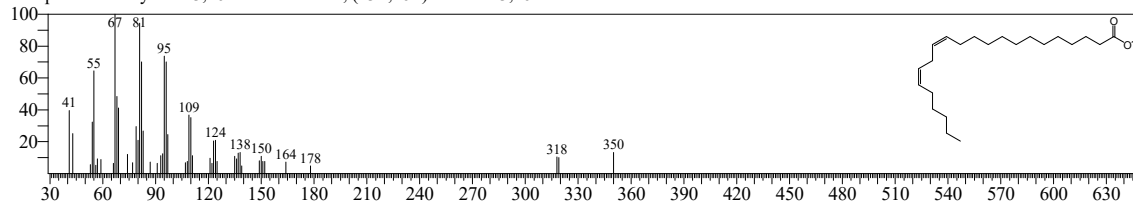

Hit#:2 Entry:21 Library:FA\_ME\_SP2560\_EI\_V3.lib

SI:52 Formula:C19H34O2 CAS:60-33-3 MolWeight:294 RetIndex:2775

CompName:Methyl linoleate ; Octadeca-9,12-dienoic acid

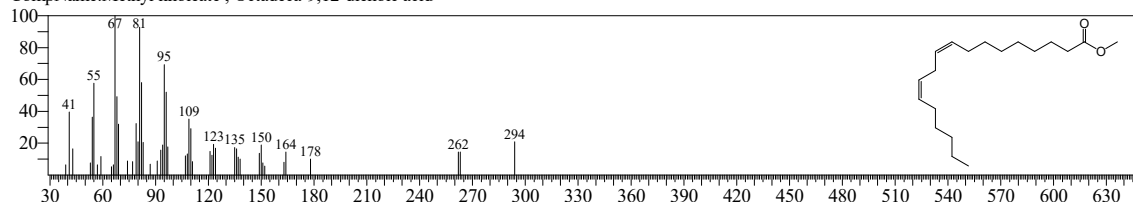

Hit#:3 Entry:20 Library:FA\_ME\_SP2560\_EI\_V3.lib

SI:51 Formula:C19H34O2 CAS:506-21-8 MolWeight:294 RetIndex:2727

CompName:Methyl linolelaidate ; (9E,12E)-octadeca-9,12-dienoic acid

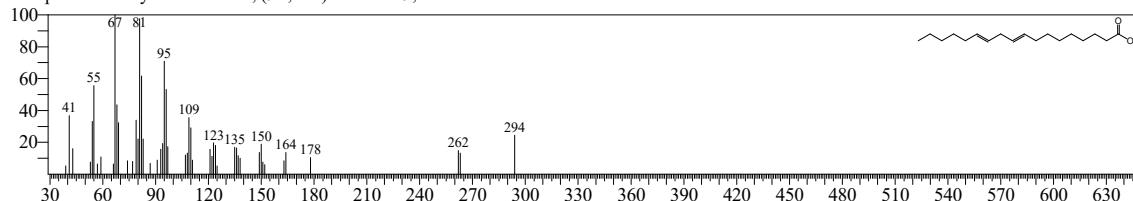

Hit#:4 Entry:27 Library:FA\_ME\_SP2560\_EI\_V3.lib

SI:51 Formula:C21H38O2 CAS:2091-39-6 MolWeight:322 RetIndex:2973

CompName:Methyl cis-11,14-Icosadienoate ; Icosa-11,14-dienoic acid

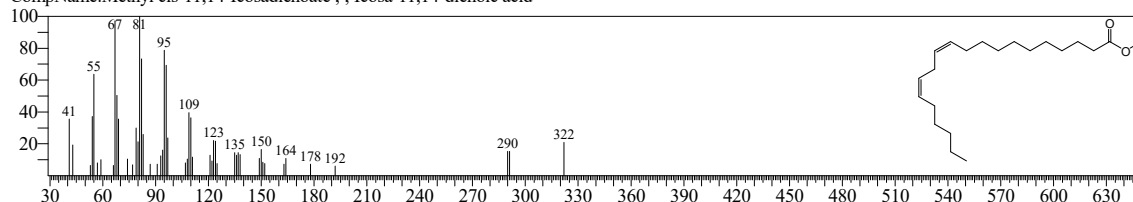

Hit#:5 Entry:11 Library:FA\_ME\_SP2560\_EI\_V3.lib

SI:51 Formula:C16H30O2 CAS:84743-29-3 MolWeight:254 RetIndex:2388

CompName:Methyl cis-10-pentadecenoate ; (Z)-pentadec-10-enoic acid

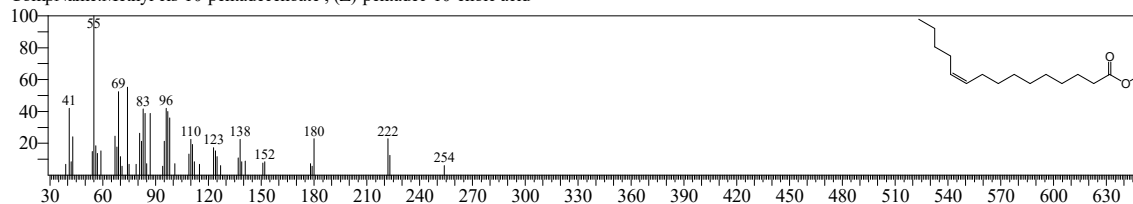

# TNAU

<< Target >>

Line#:7 R.Time:13.570(Scan#:1715) MassPeaks:327

RawMode:Averaged 13.565-13.575(1714-1716) BasePeak:155.05(14473)

BG Mode:Calc. from Peak Group 1 - Event 1 Q3 Scan

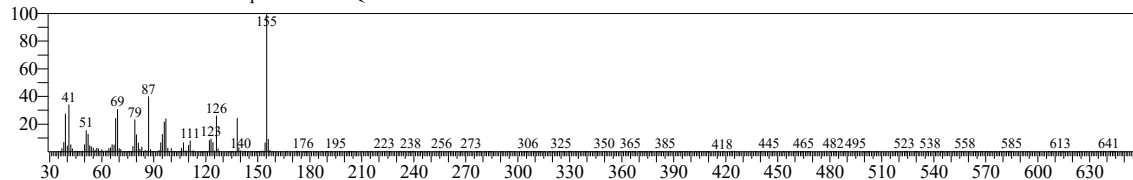

Hit#:1 Entry:34 Library:FA\_ME\_SP2560\_EI\_V3.lib

SI:53 Formula:C23H42O2 CAS:7370-49-2 MolWeight:350 RetIndex:3169

CompName:Methyl cis-13,16-Docosadienate ; (13Z,16E)-docosa-13,16-dienoic acid

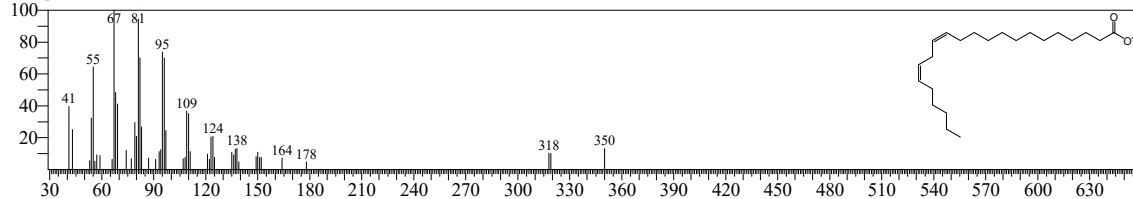

Hit#:2 Entry:21 Library:FA\_ME\_SP2560\_EI\_V3.lib

SI:52 Formula:C19H34O2 CAS:60-33-3 MolWeight:294 RetIndex:2775

CompName:Methyl linoleate ; Octadeca-9,12-dienoic acid

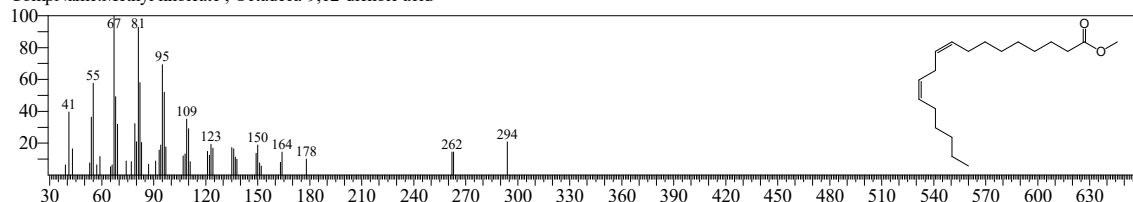

Hit#:3 Entry:20 Library:FA\_ME\_SP2560\_EI\_V3.lib

SI:52 Formula:C19H34O2 CAS:506-21-8 MolWeight:294 RetIndex:2727

CompName:Methyl linolelaidate ; (9E,12E)-octadeca-9,12-dienoic acid

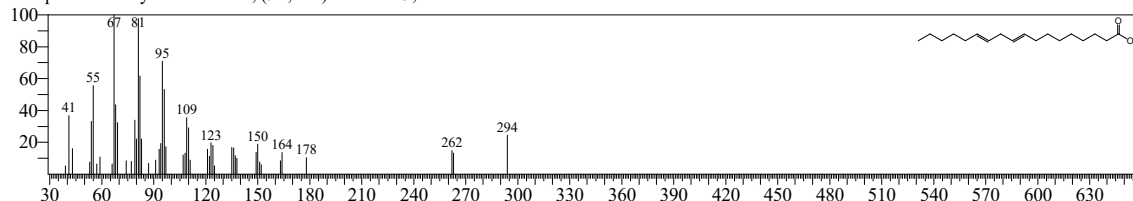

Hit#:4 Entry:11 Library:FA\_ME\_SP2560\_EI\_V3.lib

SI:51 Formula:C16H30O2 CAS:84743-29-3 MolWeight:254 RetIndex:2388

CompName:Methyl cis-10-pentadecenoate ; (Z)-pentadec-10-enoic acid

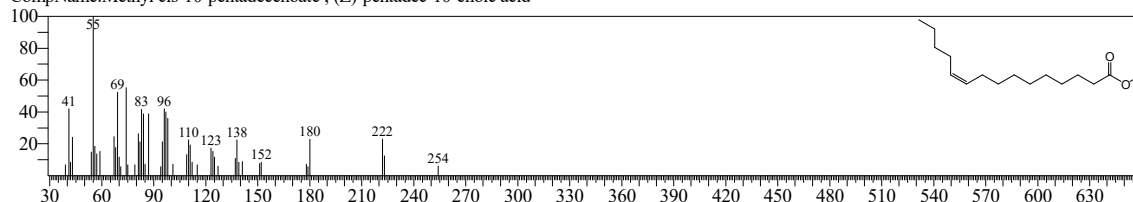

Hit#:5 Entry:27 Library:FA\_ME\_SP2560\_EI\_V3.lib

SI:51 Formula:C21H38O2 CAS:2091-39-6 MolWeight:322 RetIndex:2973

CompName:Methyl cis-11,14-Icosadienoate ; ; Icosa-11,14-dienoic acid

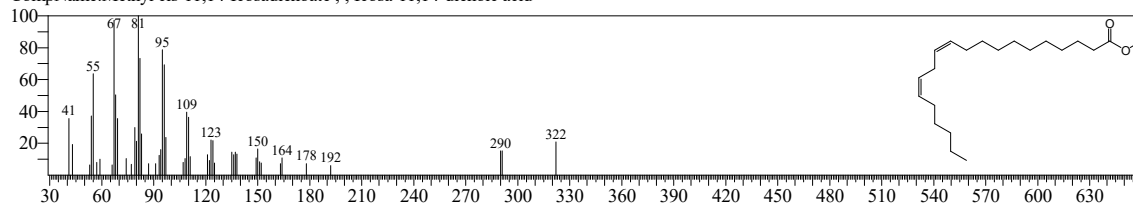



# TNAU

<< Target >>

Line#:8 R.Time:18.075(Scan#:2616) MassPeaks:362

RawMode:Averaged 18.070-18.080(2615-2617) BasePeak:60.00(3241)

BG Mode:Calc. from Peak Group 1 - Event 1 Q3 Scan

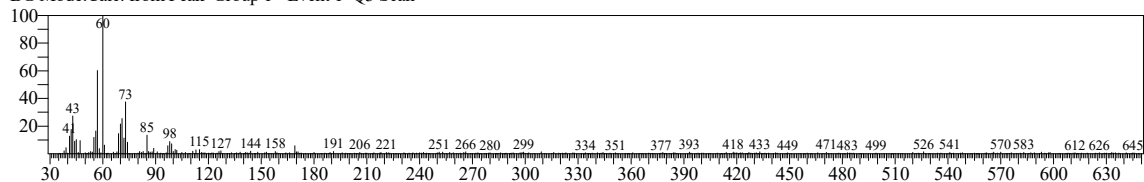

Hit#:1 Entry:13905 Library:NIST20R.lib

SI:90 Formula:C6H10O5 CAS:498-07-7 MolWeight:162 RetIndex:1404

CompName:.beta.-D-Glucopyranose, 1,6-anhydro- \$\$ Anhydro-d-mannosan \$\$ Levoglucosan \$\$ 1,6-Anhydro-.beta.-D-glucopyranose \$\$ 1,6-Anhydro-beta-

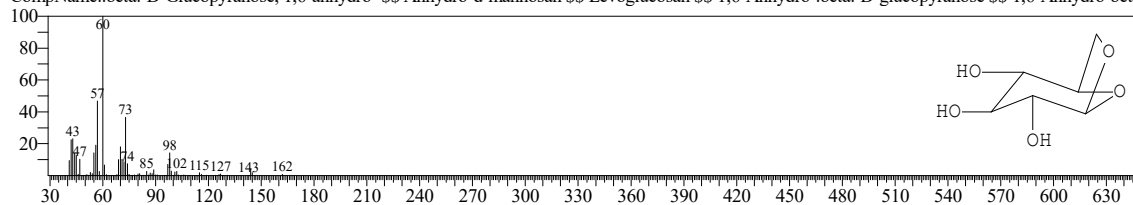

Hit#:2 Entry:36240 Library:NIST20M1.lib

SI:90 Formula:C6H12O6 CAS:2595-97-3 MolWeight:180 RetIndex:1698

CompName:D-Allose \$\$ .beta.-D-Allose \$\$ Hexose #

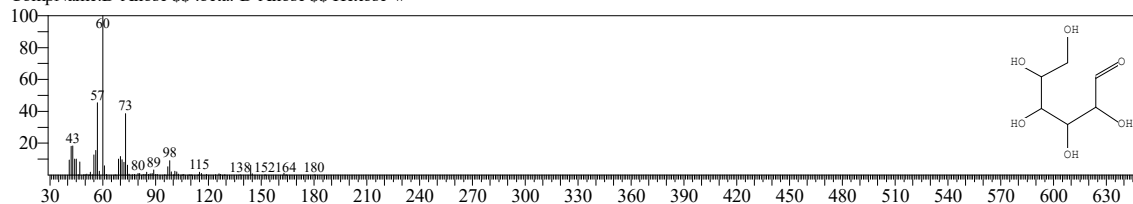

Hit#:3 Entry:23812 Library:NIST20M1.lib

SI:89 Formula:C6H10O5 CAS:0-00-0 MolWeight:162 RetIndex:1404

CompName:1,6-Anhydro-.beta.-d-talopyranose

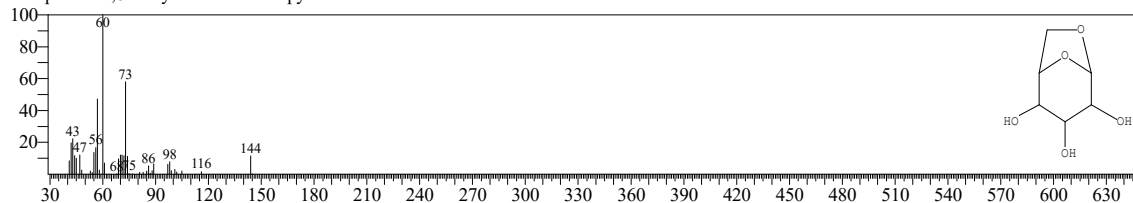

Hit#:4 Entry:23808 Library:NIST20M1.lib

SI:88 Formula:C6H10O5 CAS:0-00-0 MolWeight:162 RetIndex:1400

CompName:3,4-Altrosan \$\$ 3,4-Anhydrohexopyranose #

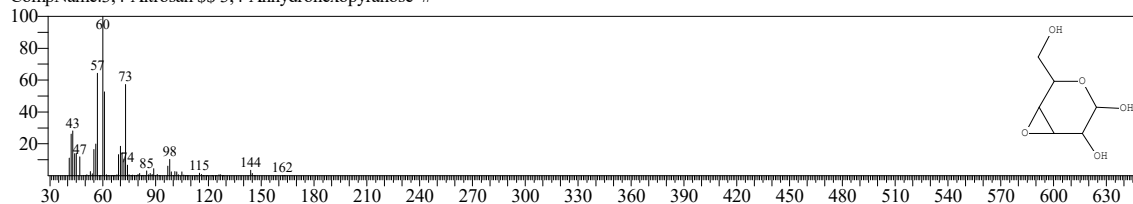

Hit#:5 Entry:62131 Library:NIST20M1.lib

SI:83 Formula:C7H14O7 CAS:0-00-0 MolWeight:210 RetIndex:2031

CompName:d-Gluco-heptulosan \$\$ Hept-2-ulopyranose #

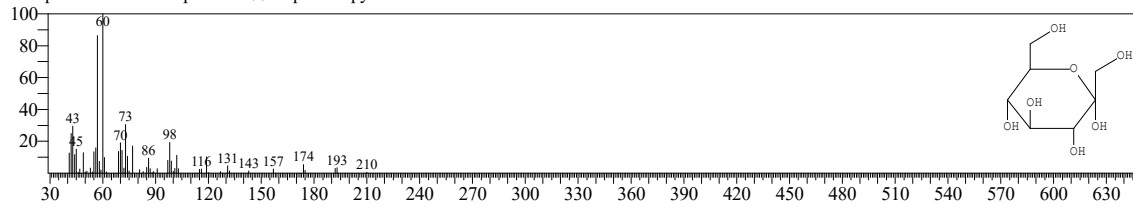

# TNAU

<< Target >>

Line#9 R.Time:18.145(Scan#:2630) MassPeaks:350

RawMode:Averaged 18.140-18.150(2629-2631) BasePeak:78.00(65)

BG Mode:Calc. from Peak Group 1 - Event 1 Q3 Scan

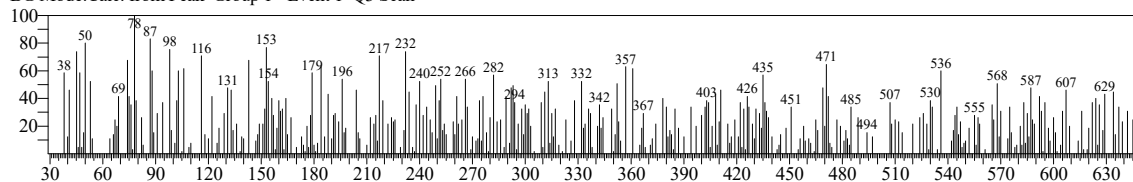

Hit#:1 Entry:6 Library:FA\_ME\_SP2560\_EI\_V3.lib

SI:18 Formula:C13H26O2 CAS:143-07-7 MolWeight:214 RetIndex:1983

CompName:Methyl laurate ; Dodecanoic acid

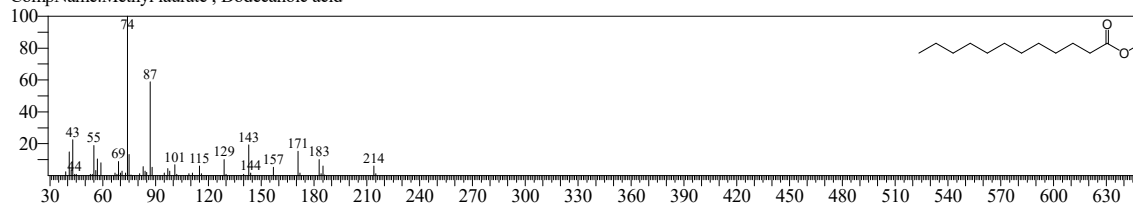

Hit#:2 Entry:8 Library:FA\_ME\_SP2560\_EI\_V3.lib

SI:18 Formula:C15H30O2 CAS:544-63-8 MolWeight:242 RetIndex:2194

CompName:Methyl myristate ; Tetradecanoic acid

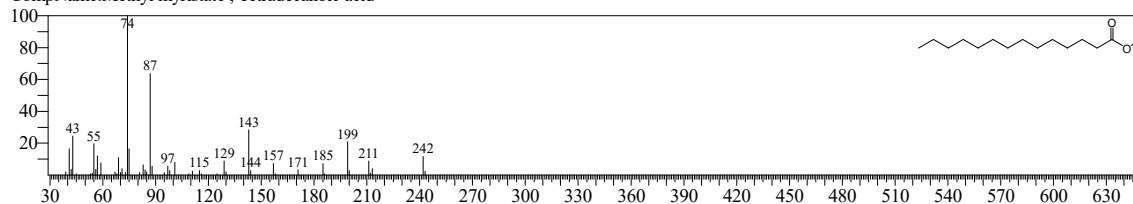

Hit#:3 Entry:7 Library:FA\_ME\_SP2560\_EI\_V3.lib

SI:18 Formula:C14H28O2 CAS:638-53-9 MolWeight:228 RetIndex:2089

CompName:Methyl tridecanoate ; Tridecanoic acid

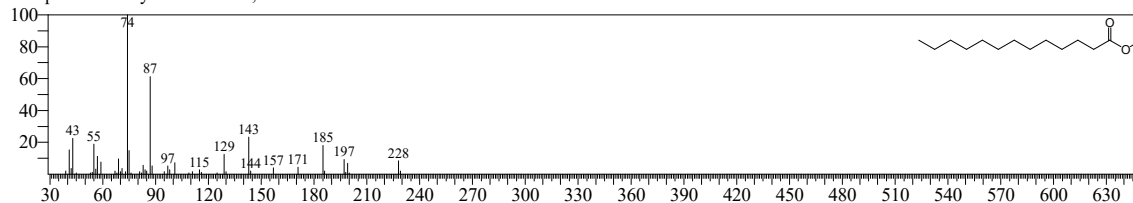

Hit#:4 Entry:5 Library:FA\_ME\_SP2560\_EI\_V3.lib

SI:17 Formula:C12H24O2 CAS:112-37-8 MolWeight:200 RetIndex:1875

CompName:Methyl undecanoate ; Undecanoic acid

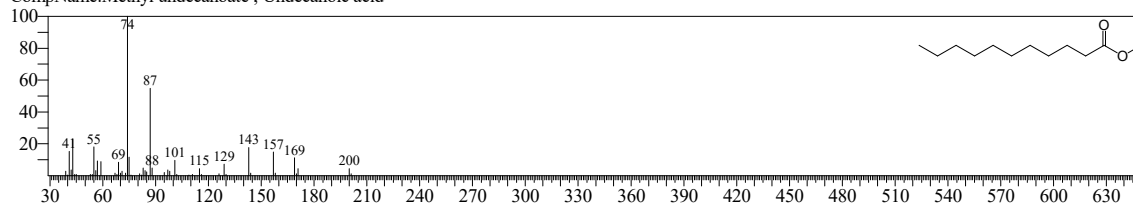

Hit#:5 Entry:4 Library:FA\_ME\_SP2560\_EI\_V3.lib

SI:17 Formula:C11H22O2 CAS:334-48-5 MolWeight:186 RetIndex:1767

CompName:Methyl caprate ; Decanoic acid

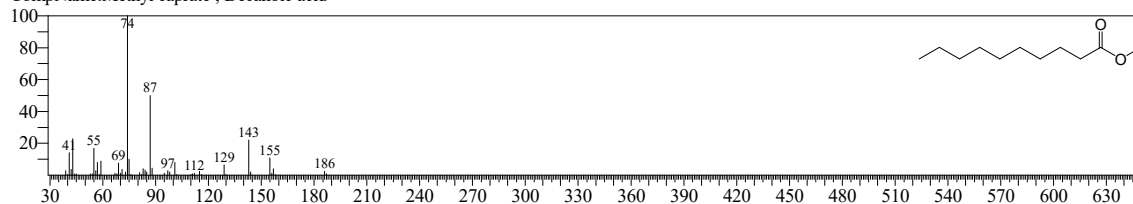

# TNAU

<< Target >>

Line#:10 R.Time:28.295(Scan#:4660) MassPeaks:312

RawMode:Averaged 28.290-28.300(4659-4661) BasePeak:73.05(5970)

BG Mode:Calc. from Peak Group 1 - Event 1 Q3 Scan

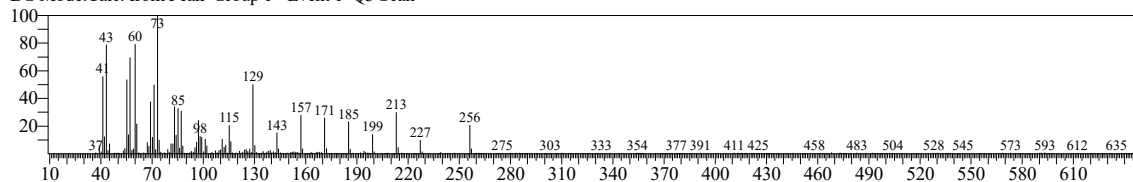

Hit#:1 Entry:31600 Library:NIST20R.lib

SI:94 Formula:C16H32O2 CAS:57-10-3 MolWeight:256 RetIndex:1968

CompName:n-Hexadecanoic acid \$ Hexadecanoic acid \$ n-Hexadecic acid \$ Palmitic acid \$ Pentadecanecarboxylic acid \$ 1-Pentadecanecarboxylic

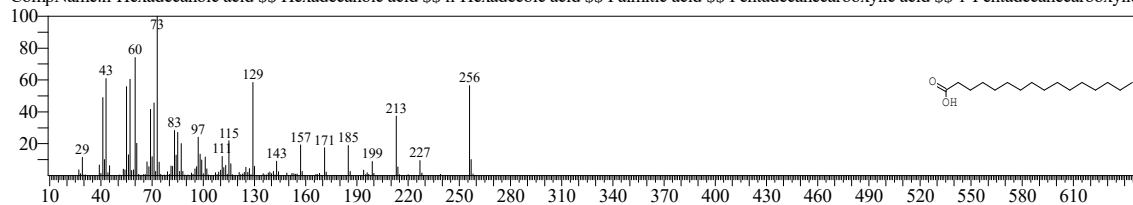

Hit#:2 Entry:29890 Library:NIST20R.lib

SI:92 Formula:C15H30O2 CAS:1002-84-2 MolWeight:242 RetIndex:1869

CompName:Pentadecanoic acid \$ Pentadecylic acid \$ n-Pentadecanoic acid \$ n-Pentadecylic acid

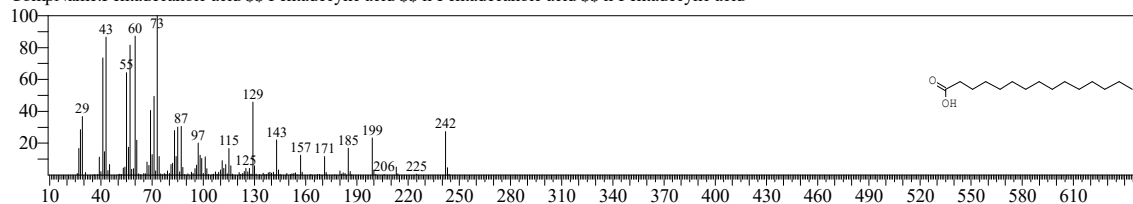

Hit#:3 Entry:44286 Library:NIST20M2.lib

SI:91 Formula:C38H68O8 CAS:28474-90-0 MolWeight:652 RetIndex:4765

CompName:l-(+)-Ascorbic acid 2,6-dihexadecanoate

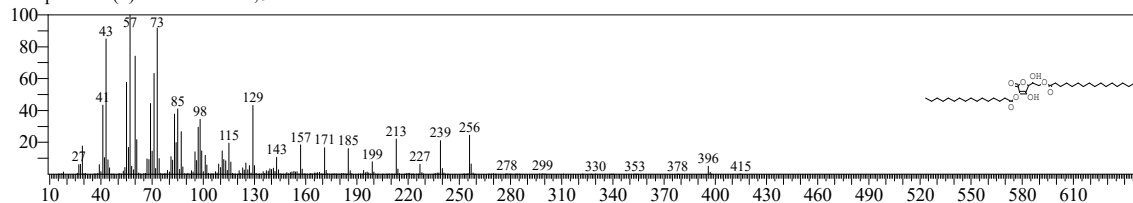

Hit#:4 Entry:25643 Library:NIST20R.lib

SI:90 Formula:C13H26O2 CAS:638-53-9 MolWeight:214 RetIndex:1670

CompName:Tridecanoic acid \$ n-Tridecanoic acid \$ n-Tridecoic acid \$ Tridecylic acid

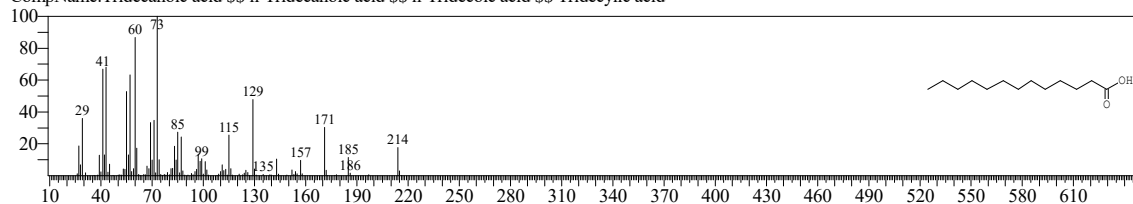

Hit#:5 Entry:144781 Library:NIST20M1.lib

SI:89 Formula:C18H36O2 CAS:57-11-4 MolWeight:284 RetIndex:2167

CompName:Octadecanoic acid \$ Stearic acid \$ n-Octadecanoic acid \$ Humko Industriene R \$ Hydrofol Acid 150 \$ Hystrene S-97 \$ Hystrene T-70 \$

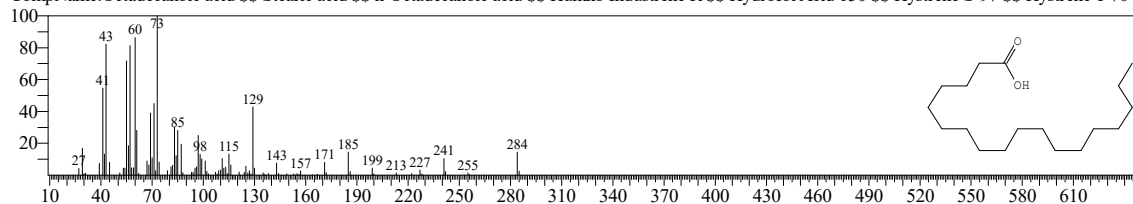

# TNAU

<< Target >>

Line#:11 R.Time:31.470(Scan#:5295) MassPeaks:386

RawMode:Averaged 31.465-31.475(5294-5296) BasePeak:67.05(3493)

BG Mode:Calc. from Peak Group 1 - Event 1 Q3 Scan

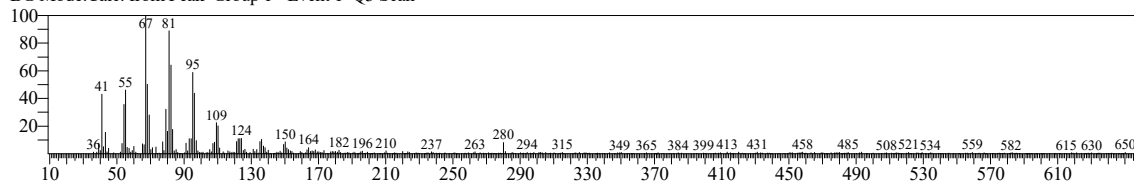

Hit#:1 Entry:139651 Library:NIST20M1.lib

SI:95 Formula:C18H32O2 CAS:544-71-8 MolWeight:280 RetIndex:2183

CompName:(9E,11E)-Octadecadienoic acid

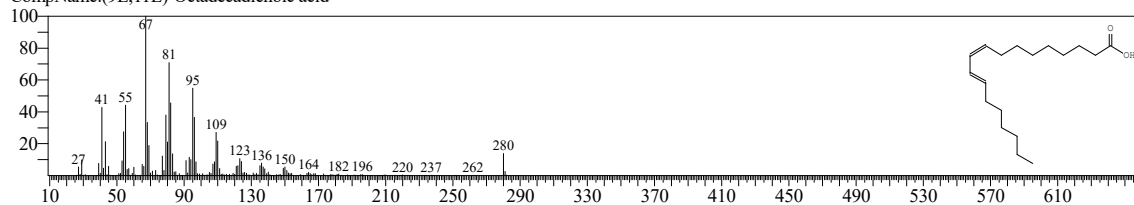

Hit#:2 Entry:34035 Library:NIST20R.lib

SI:95 Formula:C18H32O2 CAS:60-33-3 MolWeight:280 RetIndex:2183

CompName:9,12-Octadecadienoic acid (Z,Z)- \$\$ cis-9,cis-12-Octadecadienoic acid \$\$ cis,cis-Linoleic acid \$\$ Grape seed oil \$\$ Linoleic \$\$ Linoleic acid \$

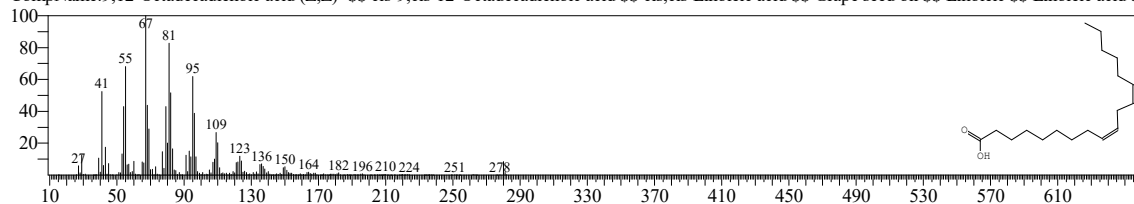

Hit#:3 Entry:139646 Library:NIST20M1.lib

SI:95 Formula:C18H32O2 CAS:2420-56-6 MolWeight:280 RetIndex:2183

CompName:10E,12Z-Octadecadienoic acid

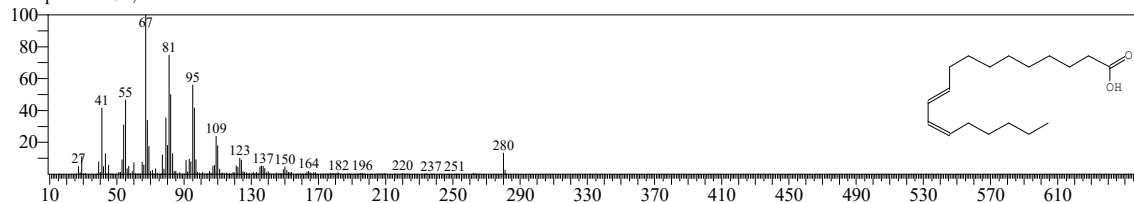

Hit#:4 Entry:139661 Library:NIST20M1.lib

SI:94 Formula:C18H32O2 CAS:506-21-8 MolWeight:280 RetIndex:2183

CompName:Linoelaidic acid

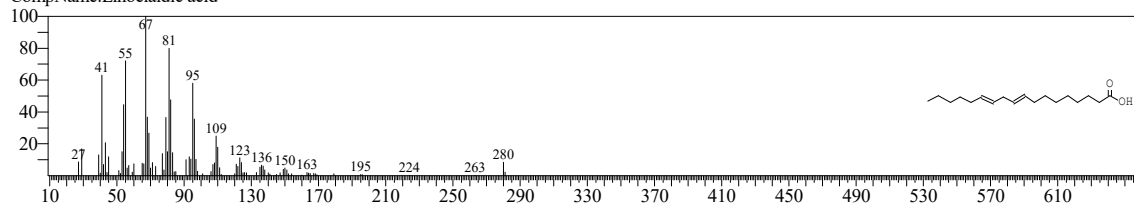

Hit#:5 Entry:173215 Library:NIST20M1.lib

SI:93 Formula:C20H36O2 CAS:2091-39-6 MolWeight:308 RetIndex:2382

CompName:11,14-Eicosadienoic acid

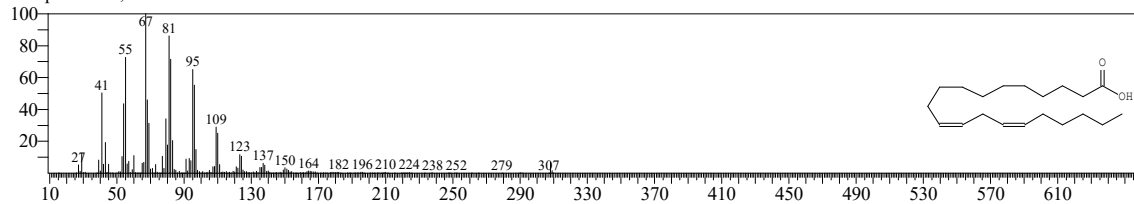

# TNAU

<< Target >>

Line#:12 R.Time:31.575(Scan#:5316) MassPeaks:423

RawMode:Averaged 31.570-31.580(5315-5317) BasePeak:79.05(1360)

BG Mode:Calc. from Peak Group 1 - Event 1 Q3 Scan

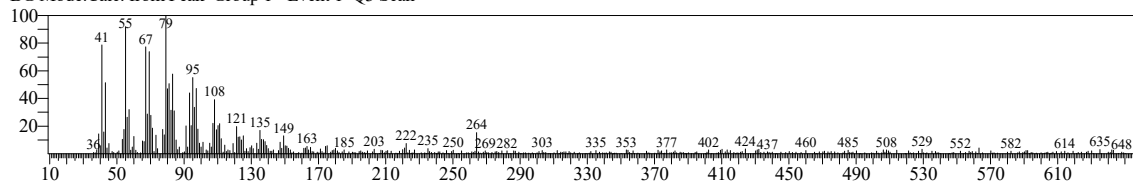

Hit#:1 Entry:92244 Library:NIST20M1.lib

SI:87 Formula:C16H30O CAS:56219-04-6 MolWeight:238 RetIndex:1808

CompName:cis-9-Hexadecenal \$ 9-Hexadecenal, (Z)- \$ (Z)-9-Hexadecenal \$ Z-9-Hexadecenal \$ (9Z)-9-Hexadecenal #

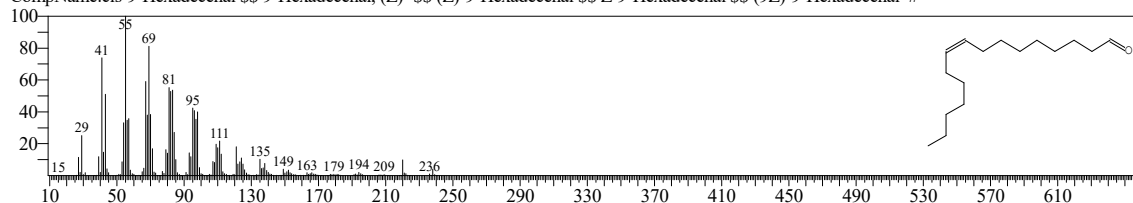

Hit#:2 Entry:63176 Library:NIST20M1.lib

SI:87 Formula:C14H26O CAS:65128-96-3 MolWeight:210 RetIndex:1609

CompName:7-Tetradecenal, (Z)- \$ Z-7-Tetradecenal \$ (7Z)-7-Tetradecenal #

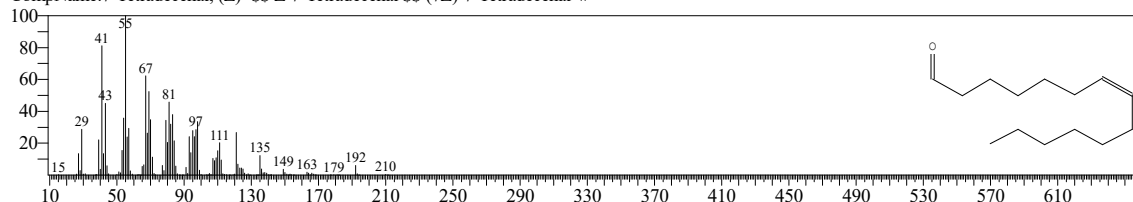

Hit#:3 Entry:170238 Library:NIST20M1.lib

SI:87 Formula:C15H24Cl2O2 CAS:0-00-0 MolWeight:306 RetIndex:2042

CompName:Dichloroacetic acid, tridec-2-ynyl ester

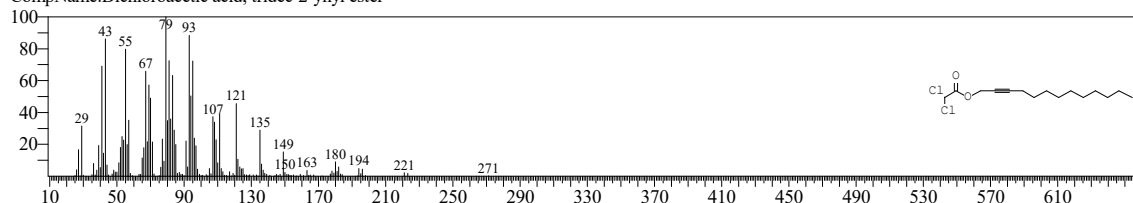

Hit#:4 Entry:156549 Library:NIST20M1.lib

SI:87 Formula:C19H34O2 CAS:0-00-0 MolWeight:294 RetIndex:2241

CompName:E,E,Z-1,3,12-Nonadecatriene-5,14-diol \$ (3E,12Z)-1,3,12-Nonadecatriene-5,14-diol #

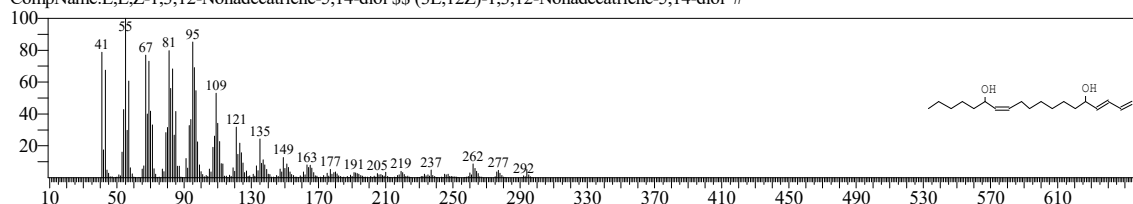

Hit#:5 Entry:92227 Library:NIST20M1.lib

SI:86 Formula:C16H30O CAS:56797-40-1 MolWeight:238 RetIndex:1808

CompName:7-Hexadecenal, (Z)- \$ (Z)-7-Hexadecenal \$ Z-7-Hexadecenal \$ (7Z)-7-Hexadecenal #

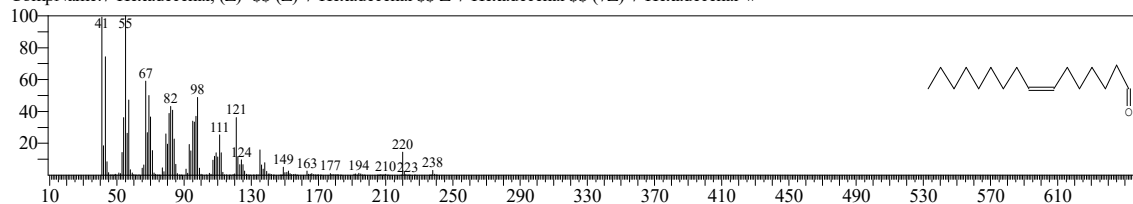

# TNAU

<< Target >>

Line#:13 R.Time:32.030(Scan#:5407) MassPeaks:346

RawMode:Averaged 32.025-32.035(5406-5408) BasePeak:73.05(1203)

BG Mode:Calc. from Peak Group 1 - Event 1 Q3 Scan

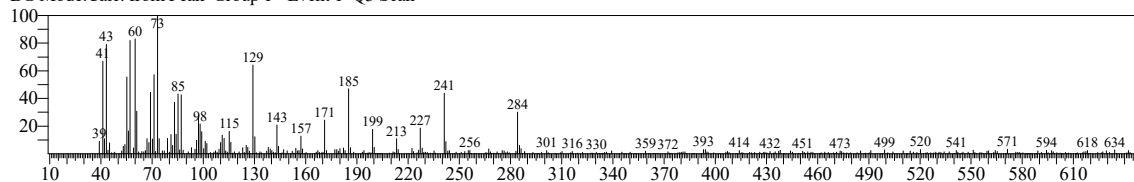

Hit#:1 Entry:34463 Library:NIST20R.lib

SI:91 Formula:C18H36O2 CAS:57-11-4 MolWeight:284 RetIndex:2167

CompName:Octadecanoic acid \$\$ Stearic acid \$\$ n-Octadecanoic acid \$\$ Humko Industriene R \$\$ Hydrofol Acid 150 \$\$ Hystrene S-97 \$\$ Hystrene T-70 \$

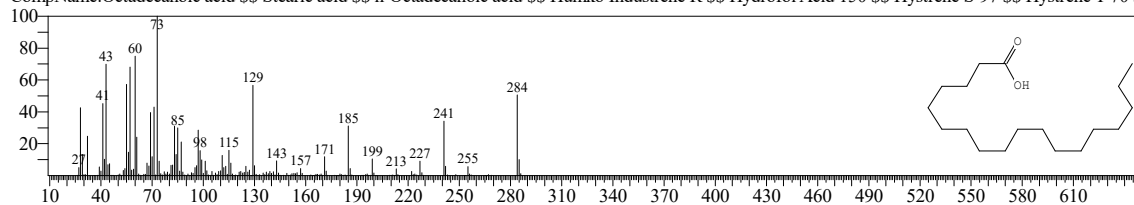

Hit#:2 Entry:29890 Library:NIST20R.lib

SI:89 Formula:C15H30O2 CAS:1002-84-2 MolWeight:242 RetIndex:1869

CompName:Pentadecanoic acid \$\$ Pentadecylic acid \$\$ n-Pentadecanoic acid \$\$ n-Pentadecylic acid

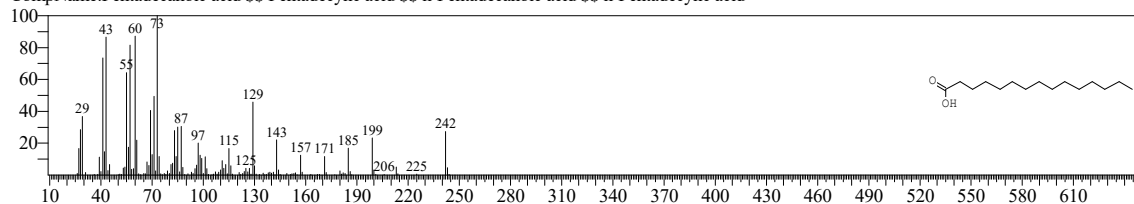

Hit#:3 Entry:31599 Library:NIST20R.lib

SI:86 Formula:C16H32O2 CAS:57-10-3 MolWeight:256 RetIndex:1968

CompName:n-Hexadecanoic acid \$\$ Hexadecanoic acid \$\$ n-Hexadecic acid \$\$ Palmitic acid \$\$ Pentadecanecarboxylic acid \$\$ 1-Pentadecanecarboxylic

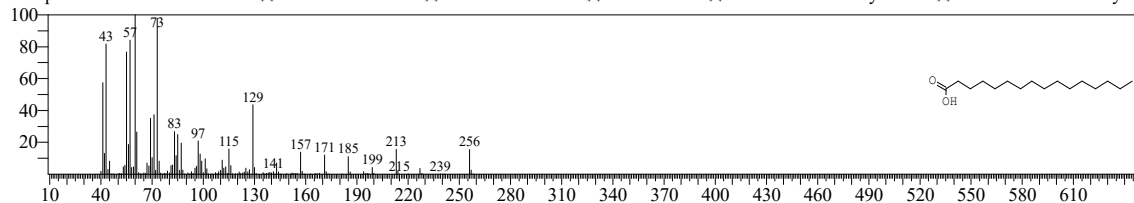

Hit#:4 Entry:44286 Library:NIST20M2.lib

SI:86 Formula:C38H68O8 CAS:28474-90-0 MolWeight:652 RetIndex:4765

CompName:l-(+)-Ascorbic acid 2,6-dihexadecanoate

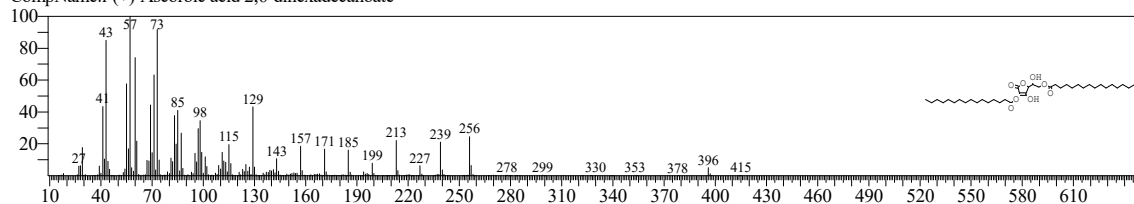

Hit#:5 Entry:36903 Library:NIST20R.lib

SI:85 Formula:C20H40O2 CAS:506-30-9 MolWeight:312 RetIndex:2366

CompName:Eicosanoic acid \$\$ Arachic acid \$\$ Arachidic acid \$\$ Icosanoic acid \$\$ n-Eicosanoic acid \$\$ Arachidic acid (synthetic)

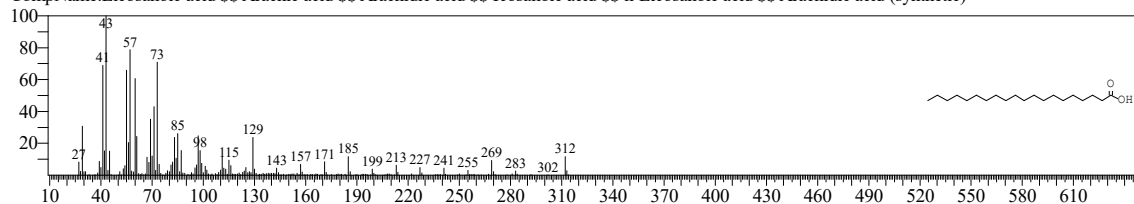

# TNAU

<< Target >>

Line#:14 R.Time:45.580(Scan#:8117) MassPeaks:447

RawMode:Averaged 45.575-45.585(8116-8118) BasePeak:139.10(7397)

BG Mode:Calc. from Peak Group 1 - Event 1 Q3 Scan

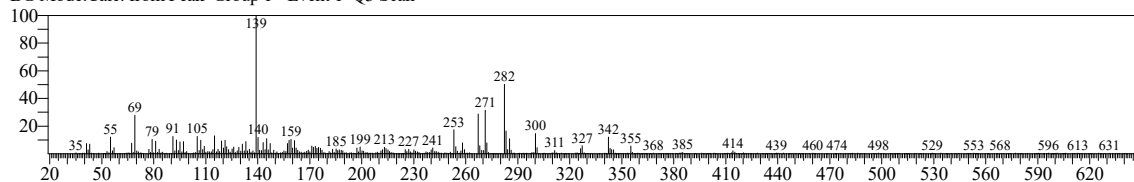

Hit#:1 Entry:8297 Library:NIST20M2.lib

SI:89 Formula:C27H42O3 CAS:512-04-9 MolWeight:414 RetIndex:2844

CompName:Diosgenin \$\$ Spirost-5-en-3-ol, (3.beta.,25R)- \$\$ Spirost-5-en-3.beta.-ol, (25R)- \$\$ Nitrogenin \$\$ 25D-spirost-5-en-3.beta.-ol \$\$ Spiro(8H-nap

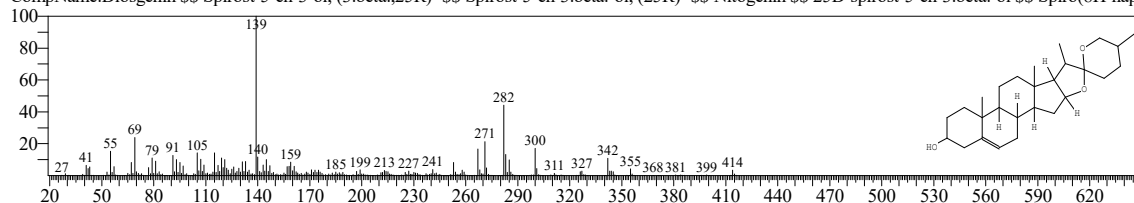

Hit#:2 Entry:14852 Library:NIST20M2.lib

SI:82 Formula:C28H44O3 CAS:116292-24-1 MolWeight:428 RetIndex:2793

CompName:Diosgenin methyl ether \$\$ Diosgenin Me derivative \$\$ (3.beta.,25R)-3-Methoxyspirost-5-ene \$\$ Spirost-5-ene, 3-methoxy-, (3.beta.,25R)-

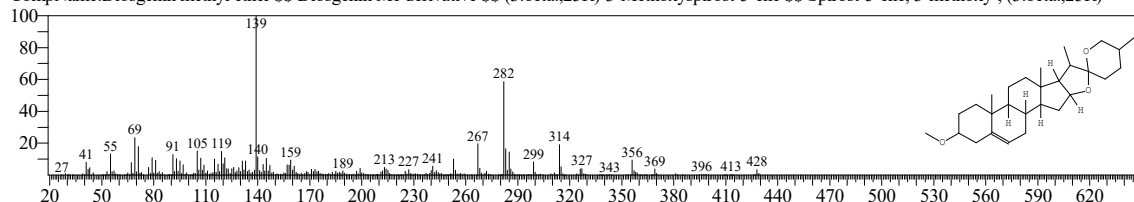

Hit#:3 Entry:24878 Library:NIST20M2.lib

SI:80 Formula:C29H44O4 CAS:1061-54-7 MolWeight:456 RetIndex:2984

CompName:Spirost-5-en-3-ol, acetate, (3.beta.,25R)- \$\$ Diosgenin acetate \$\$ Spirost-5-en-3.beta.-ol, acetate, (25R)- \$\$ Spirost-5-en-3.beta.-ol, acetate, (2-

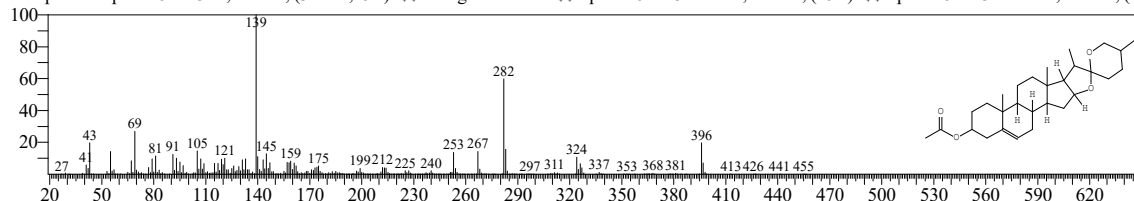

Hit#:4 Entry:41561 Library:NIST20R.lib

SI:79 Formula:C27H42O2 CAS:32277-73-9 MolWeight:398 RetIndex:2713

CompName:Des-N-solasodine \$\$ Furosta-5,20(22)-dien-3-ol #

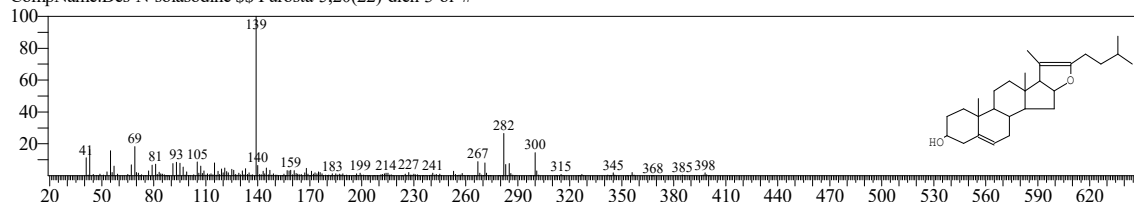

Hit#:5 Entry:42677 Library:NIST20R.lib

SI:73 Formula:C29H44O4 CAS:1180-12-7 MolWeight:456 RetIndex:2984

CompName:Neodiosgenin (3.beta.,25S) acetate \$\$ Spirost-5-en-3-ol, 3-acetate, (3.beta.,25S)- \$\$ Spirost-5-en-3-ol, acetate, (3.beta.,25S)- \$\$ Spirost-5-en-3-

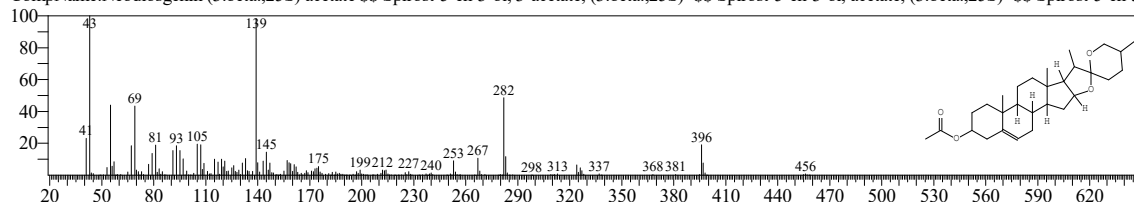

# TNAU

<< Target >>

Line#:15 R.Time:45.785(Scan#:8158) MassPeaks:367

RawMode:Averaged 45.780-45.790(8157-8159) BasePeak:355.05(479)

BG Mode:Calc. from Peak Group 1 - Event 1 Q3 Scan

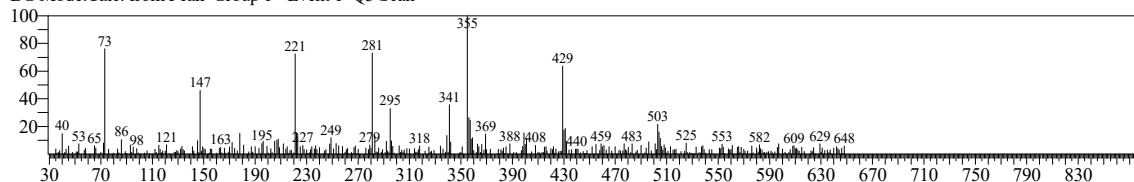

Hit#:1 Entry:46368 Library:NIST20M2.lib

SI:70 Formula:C<sub>24</sub>H<sub>72</sub>O<sub>12</sub>Si<sub>12</sub> CAS:18919-94-3 MolWeight:888 RetIndex:2480

CompName:Tetracosamethylcyclododecasiloxane \$ 2,2,4,4,6,6,8,8,10,10,12,12,14,14,16,16,18,18,20,20,22,22,24,24-Tetracosamethylcyclododecasiloxane

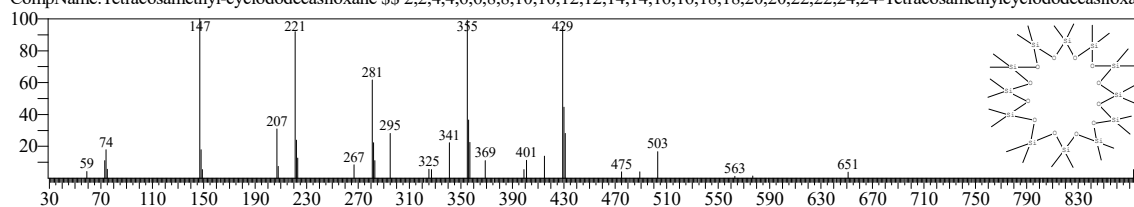

Hit#:2 Entry:402 Library:OA TMS DB5\_67min\_V3.lib

SI:52 Formula:C<sub>20</sub>H<sub>42</sub>O<sub>4</sub>Si<sub>4</sub> CAS:775-01-9 MolWeight:458 RetIndex:1942

CompName:3,4-Dihydroxymandelic acid-4TMS ; 2-(3,4-dihydroxyphenyl)-2-hydroxyacetic acid

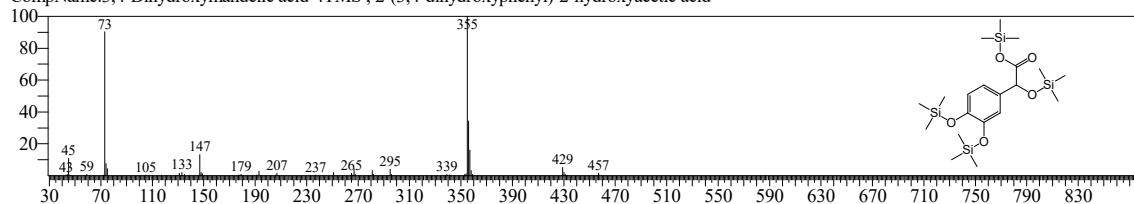

Hit#:3 Entry:343 Library:OA TMS DB5\_67min\_V3.lib

SI:41 Formula:C<sub>18</sub>H<sub>37</sub>NO<sub>3</sub>Si<sub>3</sub> CAS:51-43-4 MolWeight:399 RetIndex:1868

CompName:Epinephrine-3TMS ; 4-[(1R)-1-hydroxy-2-(methylamino)ethyl]benzene-1,2-diol

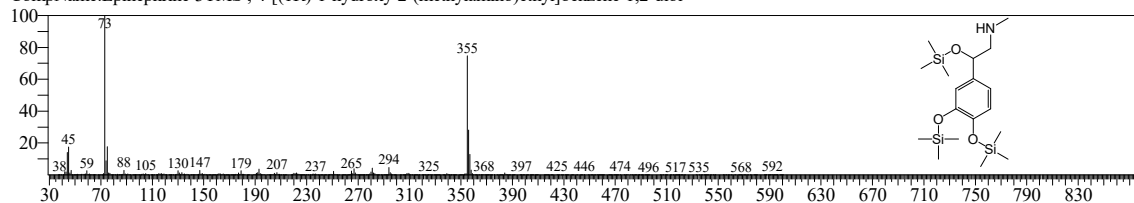

Hit#:4 Entry:384 Library:OA TMS DB5\_67min\_V3.lib

SI:34 Formula:C<sub>17</sub>H<sub>35</sub>NO<sub>3</sub>Si<sub>3</sub> CAS:65-23-6 MolWeight:385 RetIndex:1919

CompName:Pyridoxine-3TMS ; 4,5-bis(hydroxymethyl)-2-methylpyridin-3-ol

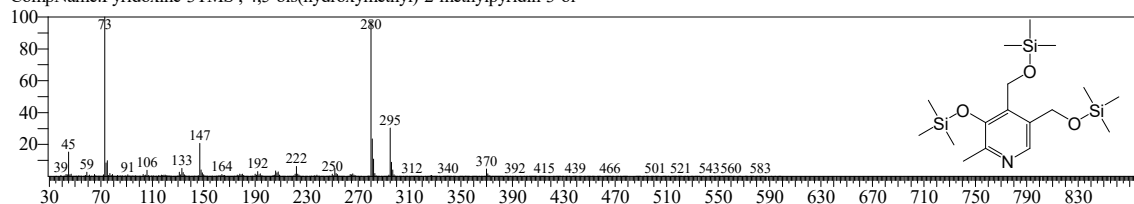

Hit#:5 Entry:443 Library:OA TMS DB5\_67min\_V3.lib

SI:31 Formula:C<sub>14</sub>H<sub>28</sub>N<sub>4</sub>O<sub>2</sub>Si<sub>3</sub> CAS:69-89-6 MolWeight:368 RetIndex:2040

CompName:Xanthine-3TMS ; 3,7-dihydropurine-2,6-dione

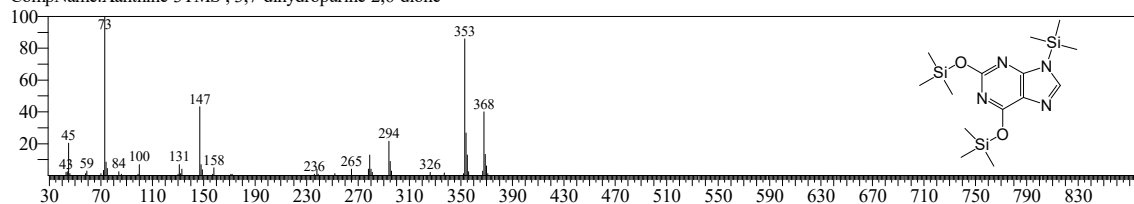

Supplement: Supplementary file 18 [file supplementary]
