# Supplementary material for: Comparative Metabolomics Profiling Reveals Key Metabolites and Associated Pathways Regulating Tuber Dormancy in White Yam (<em>Dioscorea rotundata</em>)
Source: Preprints.org preprint supplement (doi:10.20944/preprints202303.0378.v1), 2023-03-21

# TNAU

## Sample Information

Analyzed by : Admin  
 Analyzed : 02-Sep-22 9:24:00 AM  
 Sample Type : Unknown  
 Level # : 1  
 Sample Name : Sample  
 Sample ID : 6-3  
 IS Amount : [1]=1  
 Sample Amount : 1  
 Dilution Factor : 1  
 Vial # : 7  
 Injection Volume : 2.00  
 Data File : D:\GCMS-8040NX\Sep 2022\Users\01.09.2022\01092022019.qgd  
 Org Data File : D:\GCMS-8040NX\Sep 2022\Users\01.09.2022\01092022019.qgd  
 Method File : D:\GCMS-8040NX\Sep 2022\Method\Scan\_methodfile.qgm  
 Org Method File : D:\GCMS-8040NX\Sep 2022\Method\Scan\_methodfile.qgm  
 Report File :  
 Tuning File : D:\GCMS-8040NX\Aug 2022\Tuning Data\TUNING 25082022.qgt  
 Modified by : Admin  
 Modified : 05-Sep-22 11:04:00 AM

Chromatogram Sample D:\GCMS-8040NX\Sep 2022\Users\01.09.2022\01092022019.qgd

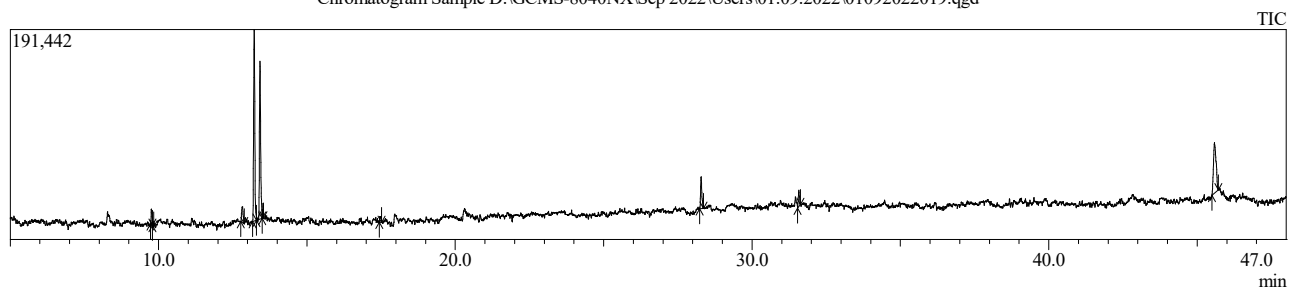

## Peak Report TIC

| Peak# | R.Time | Area    | Area%  | Height | Height% | A/H  | Similarity | Name                                  |
|-------|--------|---------|--------|--------|---------|------|------------|---------------------------------------|
| 1     | 9.759  | 30002   | 2.15   | 14314  | 3.15    | 2.10 | 92         | Pentasiloxane, dodecamethyl-          |
| 2     | 9.820  | 7544    | 0.54   | 4078   | 0.90    | 1.85 | 12         | Phenol-TMS                            |
| 3     | 12.825 | 50510   | 3.62   | 14465  | 3.18    | 3.49 | 70         | 2,5-Cyclohexadiene-1,4-dione, dioxime |
| 4     | 13.223 | 471934  | 33.80  | 174460 | 38.40   | 2.71 | 54         | Methyl cis-13,16-Docosadienate        |
| 5     | 13.419 | 401519  | 28.76  | 143996 | 31.70   | 2.79 | 54         | Methyl cis-13,16-Docosadienate        |
| 6     | 13.510 | 13166   | 0.94   | 7378   | 1.62    | 1.78 | 20         | 2-Octenoic acid-TMS                   |
| 7     | 17.459 | 15832   | 1.13   | 5389   | 1.19    | 2.94 | 17         | Methyl cis-11,14,17-Icosatrienoate    |
| 8     | 28.284 | 82722   | 5.93   | 29197  | 6.43    | 2.83 | 93         | n-Hexadecanoic acid                   |
| 9     | 31.578 | 39807   | 2.85   | 15032  | 3.31    | 2.65 | 89         | 9-Octadecenoic acid, (E)-             |
| 10    | 45.582 | 283089  | 20.28  | 45975  | 10.12   | 6.16 | 91         | Diosgenin                             |
|       |        | 1396125 | 100.00 | 454284 | 100.00  |      |            |                                       |

Library

# TNAU

<< Target >>

Line#:1 R.Time:9.760(Scan#:953) MassPeaks:319

RawMode:Averaged 9.755-9.765(952-954) BasePeak:281.05(2843)

BG Mode:Calc. from Peak Group 1 - Event 1 Q3 Scan

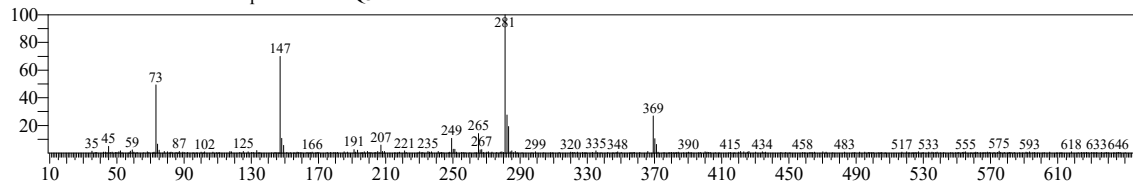

Hit#:1 Entry:40975 Library:NIST20R.lib

SI:92 Formula:C<sub>12</sub>H<sub>36</sub>O<sub>4</sub>Si<sub>5</sub> CAS:141-63-9 MolWeight:384 RetIndex:1068

CompName:Pentasiloxane, dodecamethyl- \$\$ Dodecamethylpentasiloxane \$\$ 1,1,1,3,3,5,5,7,7,9,9-Dodecamethylpentasiloxane #

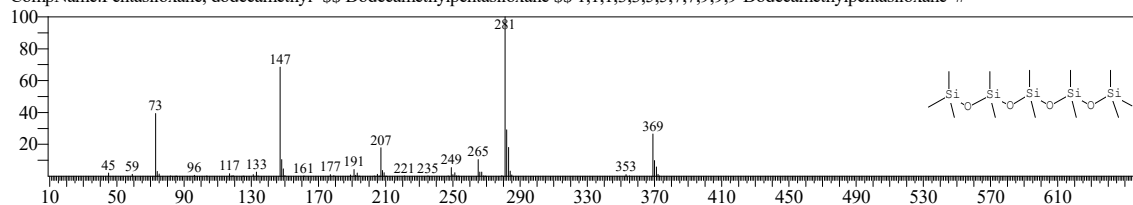

Hit#:2 Entry:249272 Library:NIST20M1.lib

SI:83 Formula:C<sub>12</sub>H<sub>36</sub>O<sub>4</sub>Si<sub>5</sub> CAS:3555-47-3 MolWeight:384 RetIndex:1068

CompName:Trisiloxane, 1,1,1,5,5,5-hexamethyl-3,3-bis[(trimethylsilyl)oxy]- \$\$ Tetrakis(trimethylsiloxy)silane \$\$ Trisiloxane, 1,1,1,5,5,5-hexamethyl-3,3-b

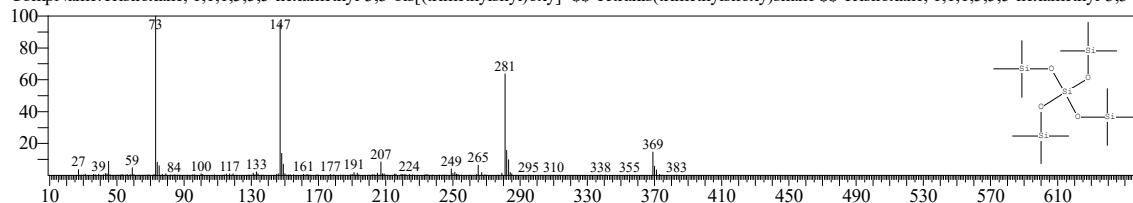

Hit#:3 Entry:249271 Library:NIST20M1.lib

SI:80 Formula:C<sub>12</sub>H<sub>36</sub>O<sub>4</sub>Si<sub>5</sub> CAS:38146-99-5 MolWeight:384 RetIndex:1068

CompName:1,1,1,3,3,5,5,7,7-Nonamethyl-3-(trimethylsiloxy)tetrasiloxane \$\$ 1,1,1,3,3,5,5,7,7-Nonamethyl-5-[(trimethylsilyl)oxy]tetrasiloxane #

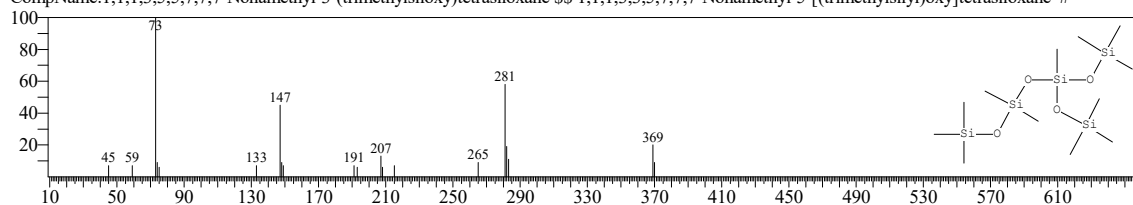

Hit#:4 Entry:27848 Library:NIST20M2.lib

SI:79 Formula:C<sub>18</sub>H<sub>48</sub>O<sub>4</sub>Si<sub>5</sub> CAS:0-00-0 MolWeight:468 RetIndex:1495

CompName:1,3,5,7,9-Pentasiloxane, 1,1,3,3,5,5,7,7,9,9-decamethyl-1,9-di(tert. butyl)-

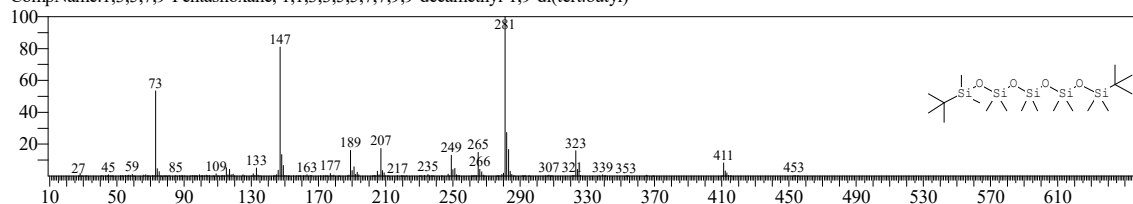

Hit#:5 Entry:158097 Library:NIST20M1.lib

SI:73 Formula:C<sub>14</sub>H<sub>24</sub>O<sub>3</sub>Si<sub>2</sub> CAS:0-00-0 MolWeight:296 RetIndex:1625

CompName:2,6-Dihydroxyacetophenone, 2TMS derivative \$\$ 2',6'-Dihydroxyacetophenone, bis(trimethylsilyl) ether

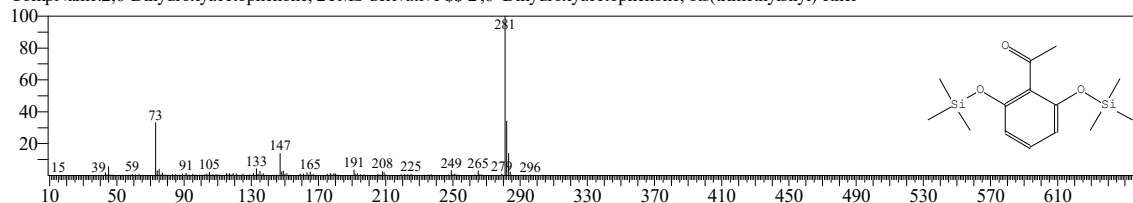

# TNAU

<< Target >>

Line#:2 R.Time:9.820(Scan#:965) MassPeaks:354

RawMode:Averaged 9.815-9.825(964-966) BasePeak:540.00(59)

BG Mode:Calc. from Peak Group 1 - Event 1 Q3 Scan

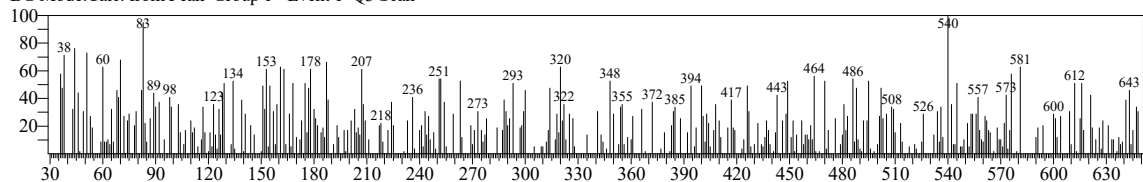

Hit#:1 Entry:7 Library:OA TMS DB5\_67min\_V3.lib

SI:12 Formula:C9H14OSi CAS:108-95-2 MolWeight:166 RetIndex:1060

CompName:Phenol-TMS ; phenol

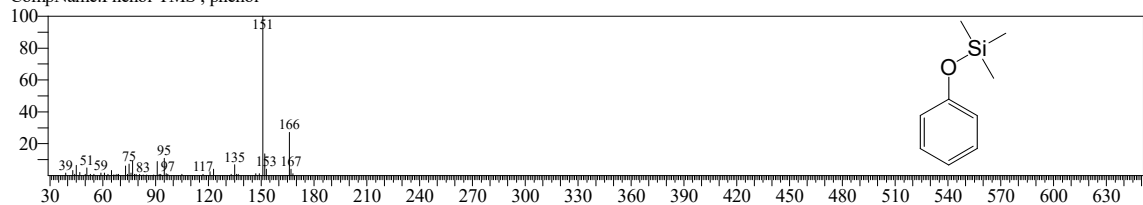

Hit#:2 Entry:178 Library:OA TMS DB5\_67min\_V3.lib

SI:10 Formula:C10H19NO3Si CAS:35842-45-6 MolWeight:229 RetIndex:1571

CompName:Tiglylglycine-TMS ; 2-[[E]-2-methylbut-2-enoyl]amino]acetic acid

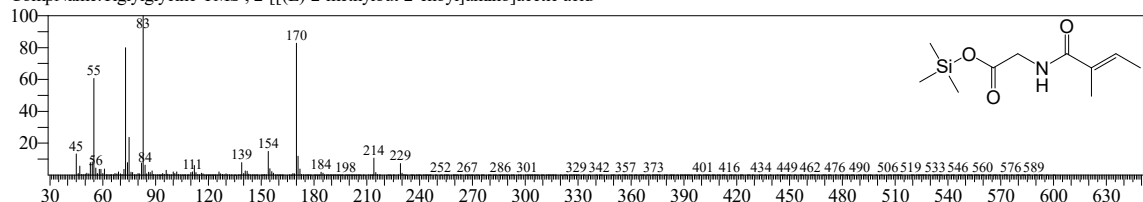

Hit#:3 Entry:175 Library:OA TMS DB5\_67min\_V3.lib

SI:10 Formula:C10H19NO3Si CAS:33008-07-0 MolWeight:229 RetIndex:1564

CompName:3-Methylcrotonylglycine-TMS ; 2-(3-methylbut-2-enoylamino)acetic acid

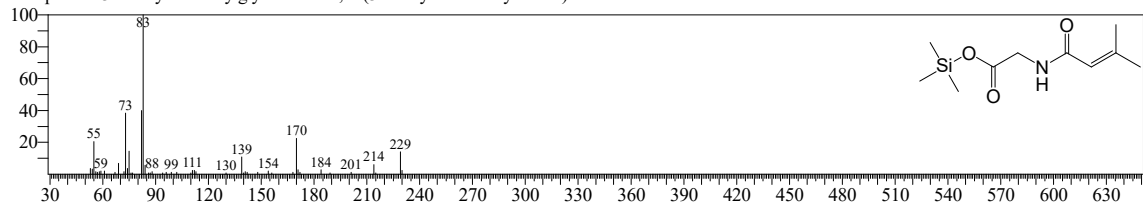

Hit#:4 Entry:171 Library:OA TMS DB5\_67min\_V3.lib

SI:10 Formula:C12H16O2Si CAS:140-10-3 MolWeight:220 RetIndex:1552

CompName:Cinnamic acid-TMS ; (E)-3-phenylprop-2-enoic acid

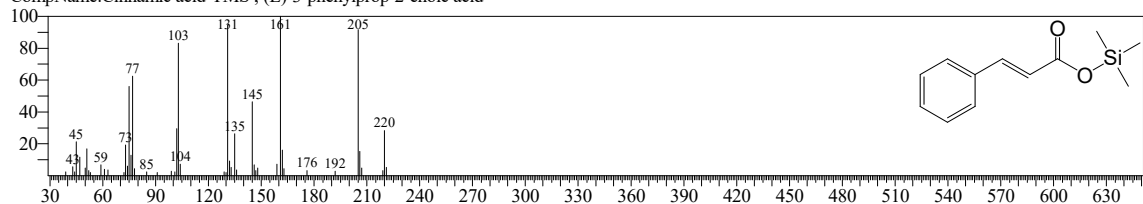

Hit#:5 Entry:459 Library:OA TMS DB5\_67min\_V3.lib

SI:8 Formula:C15H37N3O3Si3 CAS:372-75-8 MolWeight:391 RetIndex:2112

CompName:Citrulline-3TMS ; (2S)-2-amino-5-(carbamoylamino)pentanoic acid

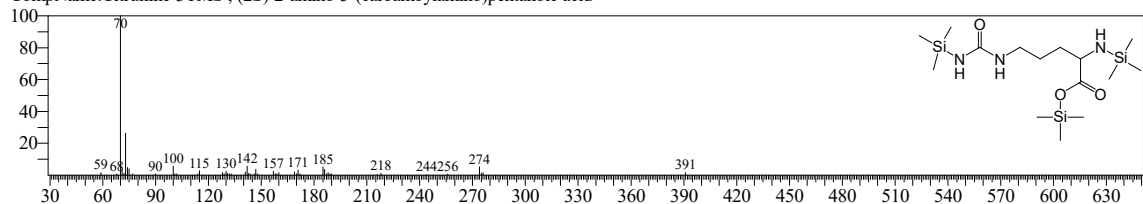

# TNAU

<< Target >>

Line#3 R.Time:12.825(Scan#:1566) MassPeaks:332

RawMode:Averaged 12.820-12.830(1565-1567) BasePeak:138.05(5138)

BG Mode:Calc. from Peak Group 1 - Event 1 Q3 Scan

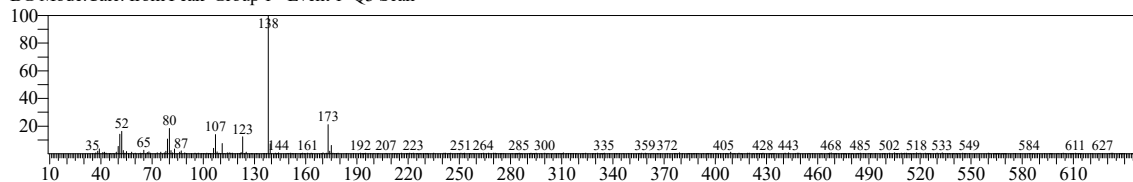

Hit#1 Entry:8360 Library:NIST20R.lib

SI:70 Formula:C6H6N2O2 CAS:105-11-3 MolWeight:138 RetIndex:1349

CompName:2,5-Cyclohexadiene-1,4-dione, dioxime \$\$ p-Benzoquinone, dioxime \$\$ p-Quinone dioxime \$\$ p-Quinone oxime \$\$ Benzoquinone dioxime \$\$

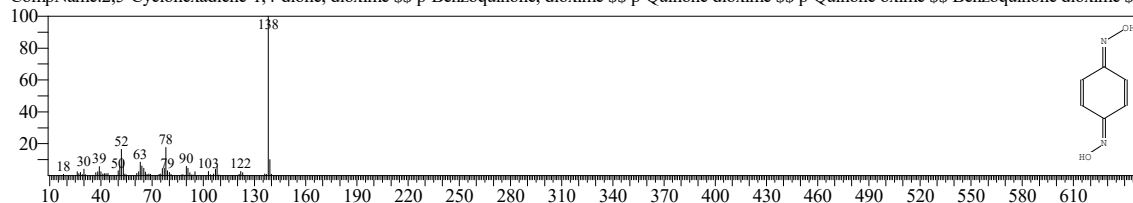

Hit#2 Entry:127 Library:OA TMS\_DB5\_67min\_V3.lib

SI:36 Formula: CAS:51568-18-4 MolWeight:0 RetIndex:1453

CompName:Succinylacetone-ox-origin fragment ; 4,6-dioxoheptanoic acid

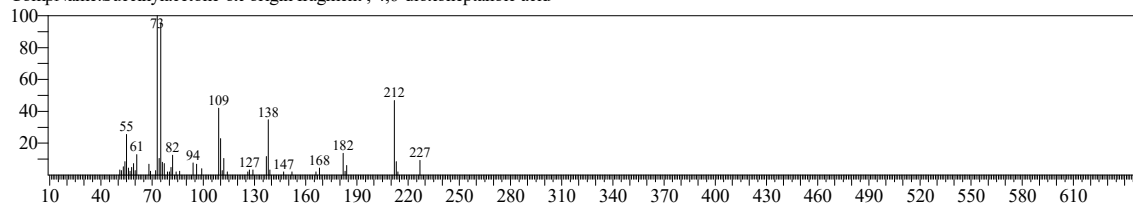

Hit#3 Entry:34 Library:FA\_ME\_SP2560\_EI\_V3.lib

SI:34 Formula:C23H42O2 CAS:7370-49-2 MolWeight:350 RetIndex:3169

CompName:Methyl cis-13,16-Docosadienate ; (13Z,16E)-docosa-13,16-dienoic acid

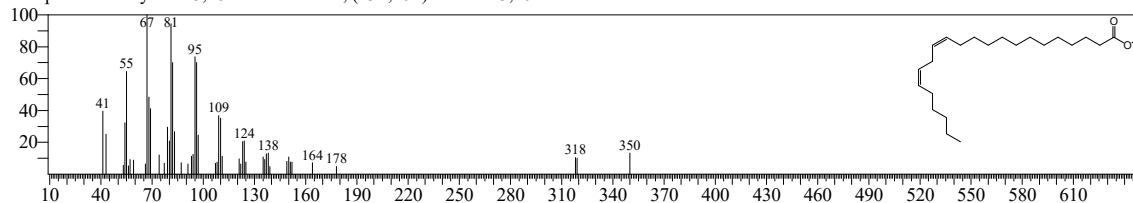

Hit#4 Entry:21 Library:FA\_ME\_SP2560\_EI\_V3.lib

SI:34 Formula:C19H34O2 CAS:60-33-3 MolWeight:294 RetIndex:2775

CompName:Methyl linoleate ; Octadeca-9,12-dienoic acid

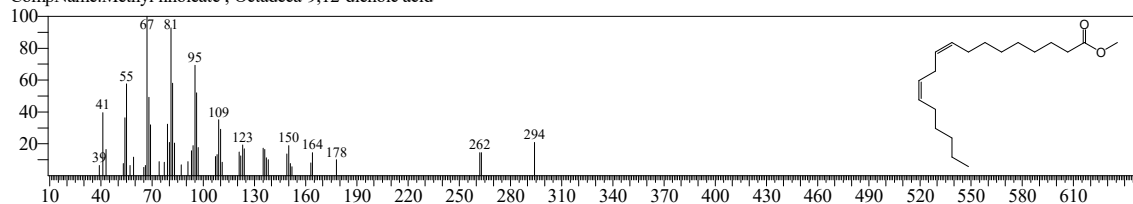

Hit#5 Entry:20 Library:FA\_ME\_SP2560\_EI\_V3.lib

SI:33 Formula:C19H34O2 CAS:506-21-8 MolWeight:294 RetIndex:2727

CompName:Methyl linolelaidate ; (9E,12E)-octadeca-9,12-dienoic acid

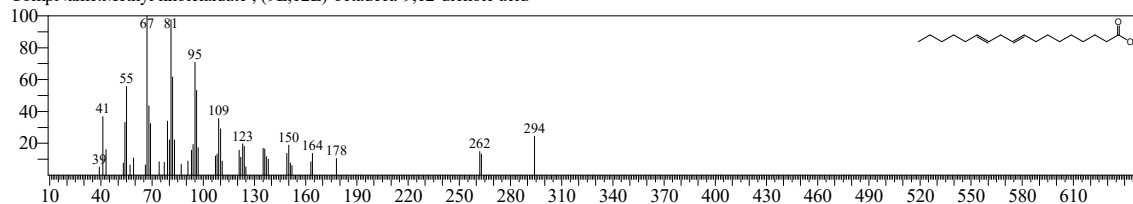

# TNAU

<< Target >>

Line#:4 R.Time:13.225(Scan#:1646) MassPeaks:283

RawMode:Averaged 13.220-13.230(1645-1647) BasePeak:155.05(26843)

BG Mode:Calc. from Peak Group 1 - Event 1 Q3 Scan

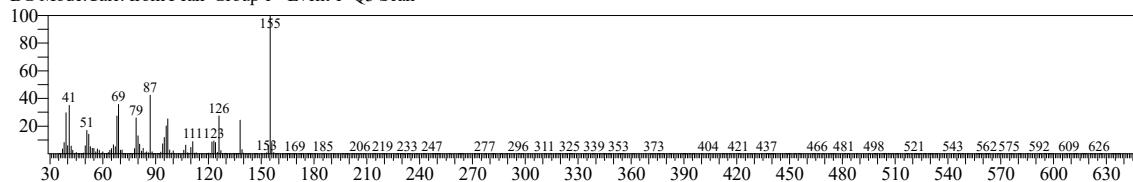

Hit#:1 Entry:34 Library:FA\_ME\_SP2560\_EI\_V3.lib

SI:54 Formula:C23H42O2 CAS:7370-49-2 MolWeight:350 RetIndex:3169

CompName:Methyl cis-13,16-Docosadienate ; (13Z,16E)-docosa-13,16-dienoic acid

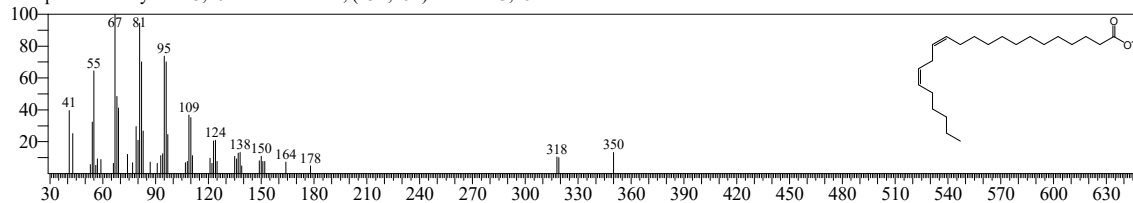

Hit#:2 Entry:21 Library:FA\_ME\_SP2560\_EI\_V3.lib

SI:53 Formula:C19H34O2 CAS:60-33-3 MolWeight:294 RetIndex:2775

CompName:Methyl linoleate ; Octadeca-9,12-dienoic acid

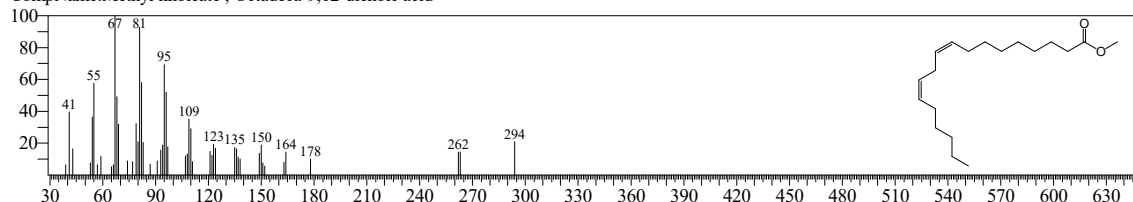

Hit#:3 Entry:20 Library:FA\_ME\_SP2560\_EI\_V3.lib

SI:52 Formula:C19H34O2 CAS:506-21-8 MolWeight:294 RetIndex:2727

CompName:Methyl linolelaidate ; (9E,12E)-octadeca-9,12-dienoic acid

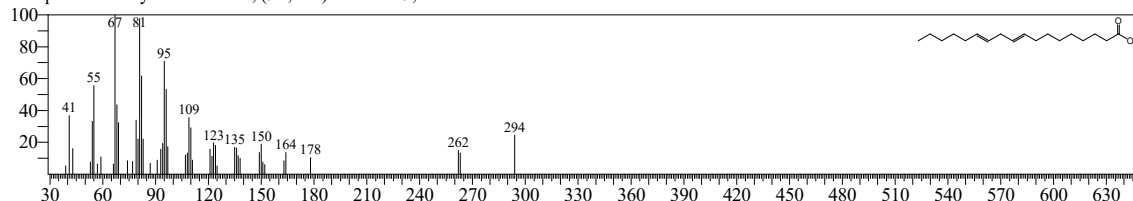

Hit#:4 Entry:27 Library:FA\_ME\_SP2560\_EI\_V3.lib

SI:52 Formula:C21H38O2 CAS:2091-39-6 MolWeight:322 RetIndex:2973

CompName:Methyl cis-11,14-Icosadienoate ; Icosa-11,14-dienoic acid

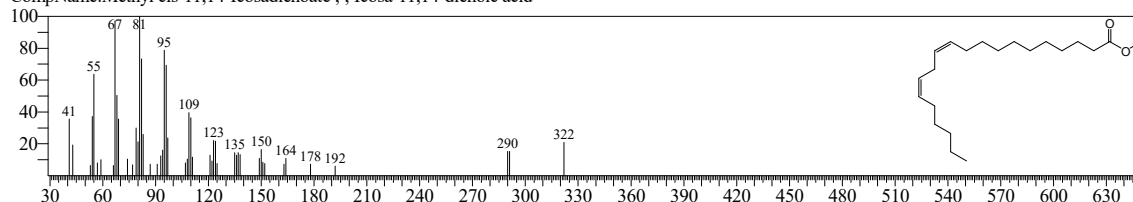

Hit#:5 Entry:11 Library:FA\_ME\_SP2560\_EI\_V3.lib

SI:52 Formula:C16H30O2 CAS:84743-29-3 MolWeight:254 RetIndex:2388

CompName:Methyl cis-10-pentadecenoate ; (Z)-pentadec-10-enoic acid

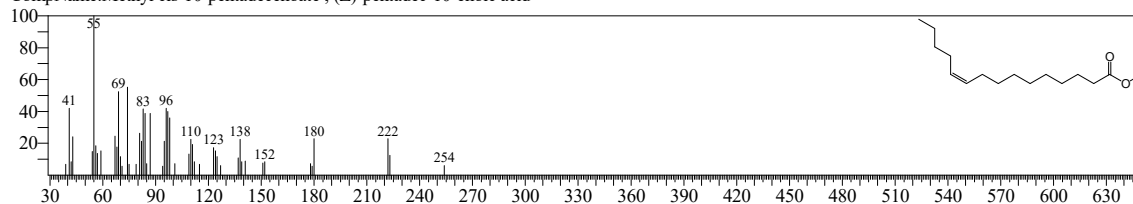

# TNAU

<< Target >>

Line#:5 R.Time:13.420(Scan#:1685) MassPeaks:375

RawMode:Averaged 13.415-13.425(1684-1686) BasePeak:155.10(20685)

BG Mode:Calc. from Peak Group 1 - Event 1 Q3 Scan

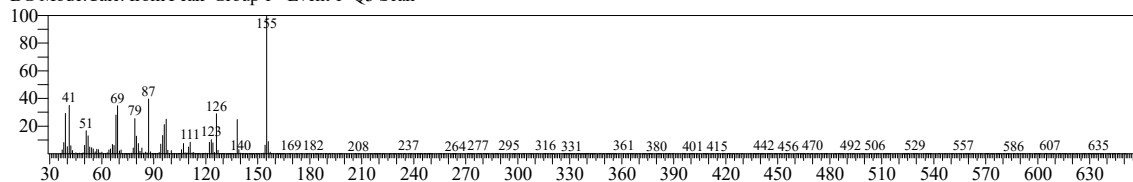

Hit#:1 Entry:34 Library:FA\_ME\_SP2560\_EI\_V3.lib

SI:54 Formula:C23H42O2 CAS:7370-49-2 MolWeight:350 RetIndex:3169

CompName:Methyl cis-13,16-Docosadienate ; (13Z,16E)-docosa-13,16-dienoic acid

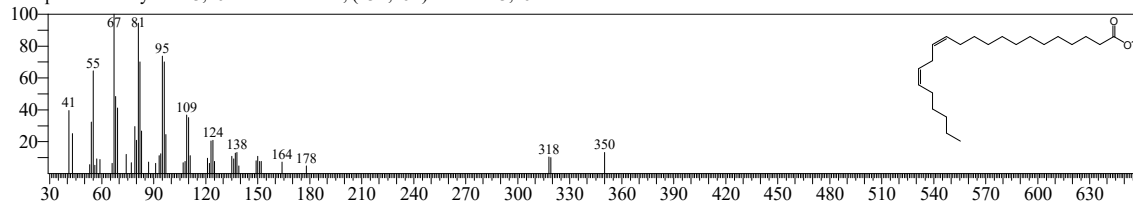

Hit#:2 Entry:21 Library:FA\_ME\_SP2560\_EI\_V3.lib

SI:53 Formula:C19H34O2 CAS:60-33-3 MolWeight:294 RetIndex:2775

CompName:Methyl linoleate ; Octadeca-9,12-dienoic acid

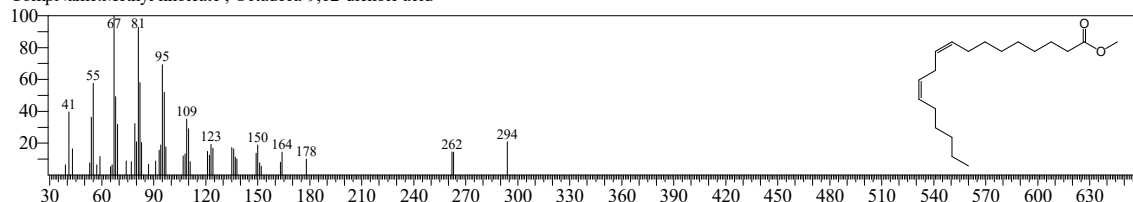

Hit#:3 Entry:20 Library:FA\_ME\_SP2560\_EI\_V3.lib

SI:52 Formula:C19H34O2 CAS:506-21-8 MolWeight:294 RetIndex:2727

CompName:Methyl linolelaidate ; (9E,12E)-octadeca-9,12-dienoic acid

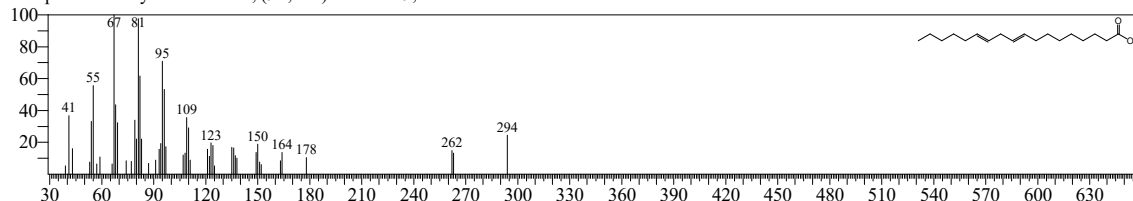

Hit#:4 Entry:27 Library:FA\_ME\_SP2560\_EI\_V3.lib

SI:52 Formula:C21H38O2 CAS:2091-39-6 MolWeight:322 RetIndex:2973

CompName:Methyl cis-11,14-Icosadienoate ; Icosa-11,14-dienoic acid

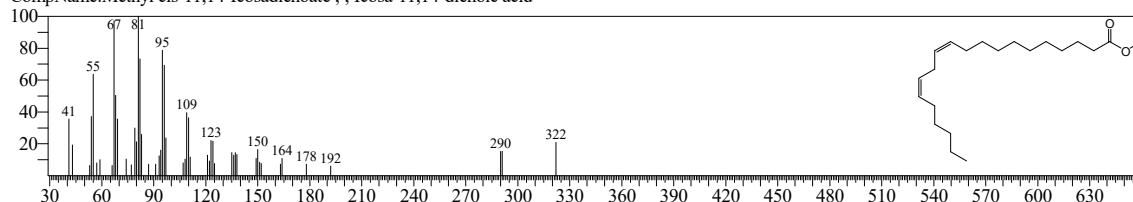

Hit#:5 Entry:11 Library:FA\_ME\_SP2560\_EI\_V3.lib

SI:52 Formula:C16H30O2 CAS:84743-29-3 MolWeight:254 RetIndex:2388

CompName:Methyl cis-10-pentadecenoate ; (Z)-pentadec-10-enoic acid

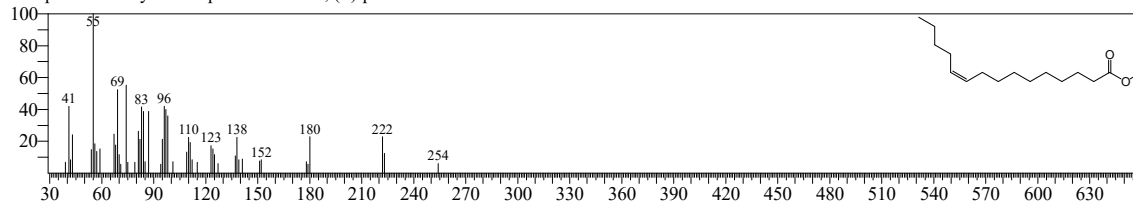

# TNAU

<< Target >>

Line#:6 R.Time:13.510(Scan#:1703) MassPeaks:371

RawMode:Averaged 13.505-13.515(1702-1704) BasePeak:96.00(49)

BG Mode:Calc. from Peak Group 1 - Event 1 Q3 Scan

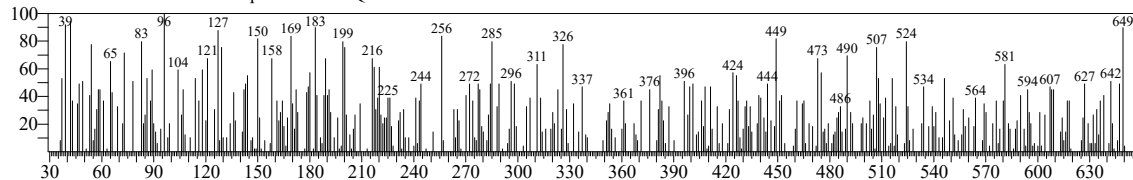

Hit#:1 Entry:91 Library:OA\_TMS\_DB5\_67min\_V3.lib

SI:20 Formula:C11H22O2Si CAS:1871-67-6 MolWeight:214 RetIndex:1313

CompName:2-Octenoic acid-TMS; (E)-oct-2-enoic acid

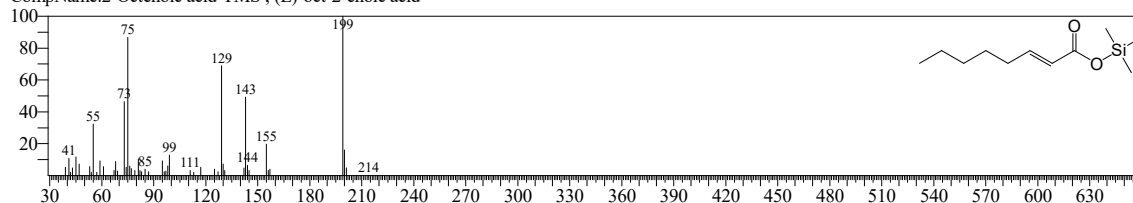

Hit#:2 Entry:51 Library:OA\_TMS\_DB5\_67min\_V3.lib

SI:19 Formula:C10H21NO3Si CAS:816-66-0 MolWeight:231 RetIndex:1217

CompName:2-Ketoisocaproic acid-meto-TMS(2); 4-methyl-2-oxopentanoic acid

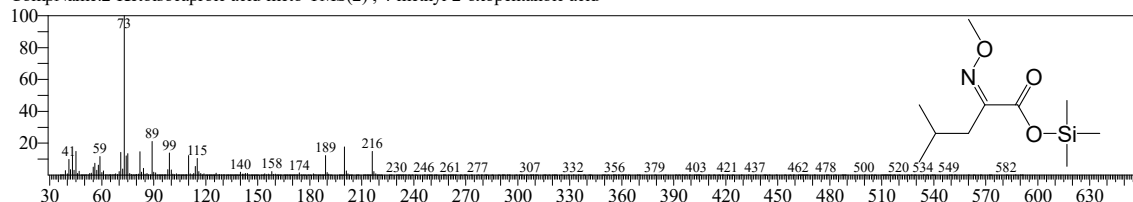

Hit#:3 Entry:42 Library:OA\_TMS\_DB5\_67min\_V3.lib

SI:19 Formula:C10H21NO3Si CAS:1460-34-0 MolWeight:231 RetIndex:1204

CompName:3-Methyl-2-oxovaleric acid-meto-TMS(2); 3-methyl-2-oxopentanoic acid

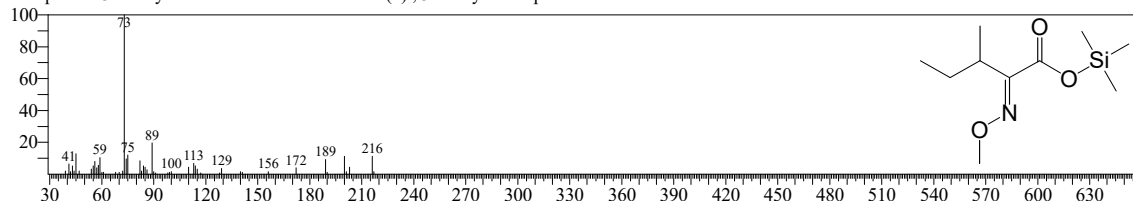

Hit#:4 Entry:497 Library:OA\_TMS\_DB5\_67min\_V3.lib

SI:17 Formula:C16H33NO5Si2 CAS:60317-54-6 MolWeight:375 RetIndex:2271

CompName:Suberylglycine-2TMS; 8-(carboxymethylamino)-8-oxooctanoic acid

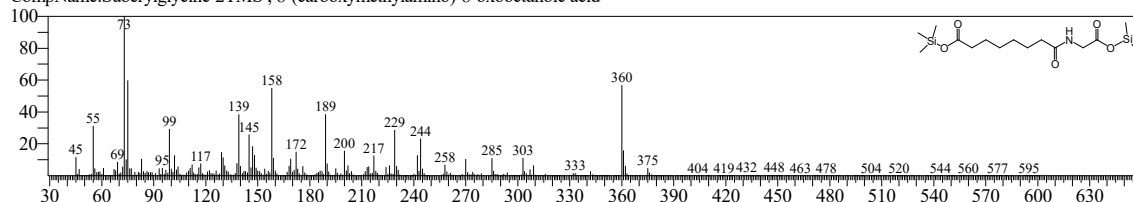

Hit#:5 Entry:227 Library:OA\_TMS\_DB5\_67min\_V3.lib

SI:16 Formula:C17H42O5Si4 CAS:50-69-1 MolWeight:438 RetIndex:1657

CompName:Ribose-4TMS(1); (3R,4S,5R)-5-(hydroxymethyl)oxolane-2,3,4-triol

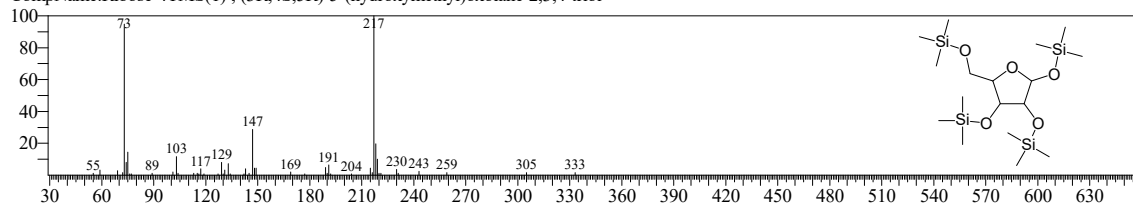

# TNAU

<< Target >>

Line#:7 R.Time:17.460(Scan#:2493) MassPeaks:415

RawMode:Averaged 17.455-17.465(2492-2494) BasePeak:42.00(60)

BG Mode:Calc. from Peak Group 1 - Event 1 Q3 Scan

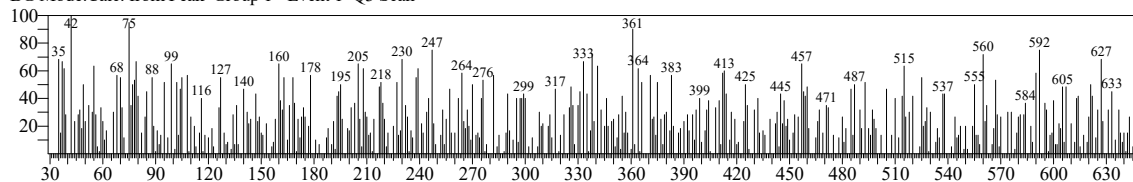

Hit#:1 Entry:31 Library:FA\_ME\_SP2560\_EI\_V3.lib

SI:17 Formula:C21H36O2 CAS:2091-27-2 MolWeight:320 RetIndex:3089

CompName:Methyl cis-11,14,17-Icosatrienoate ; Icosa-11,14,17-trienoic acid

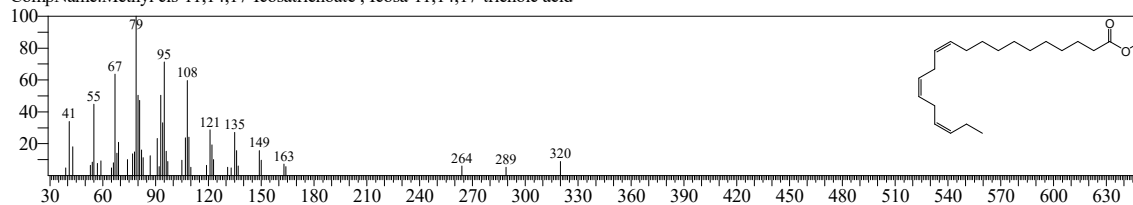

Hit#:2 Entry:534 Library:OA\_TMS\_DB5\_67min\_V3.lib

SI:16 Formula:C25H42O2Si CAS:24880-45-3 MolWeight:402 RetIndex:2591

CompName:Docosapentaenoic acid-TMS ; (7Z,10Z,13Z,16Z,19Z)-docosa-7,10,13,16,19-pentaenoic acid

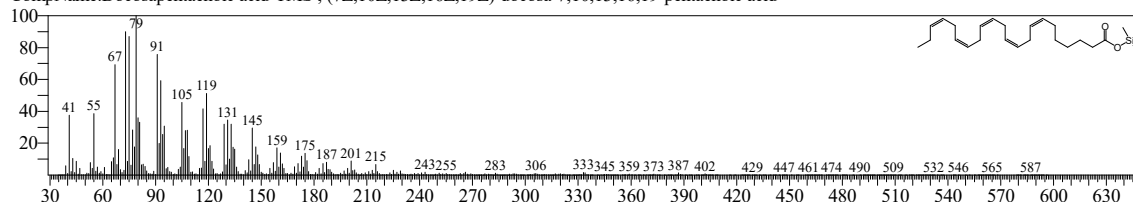

Hit#:3 Entry:509 Library:OA\_TMS\_DB5\_67min\_V3.lib

SI:15 Formula:C23H38O2Si CAS:10417-94-4 MolWeight:374 RetIndex:2389

CompName:Eicosapentaenoic acid-TMS ; icoso-5,8,11,14,17-pentaenoic acid

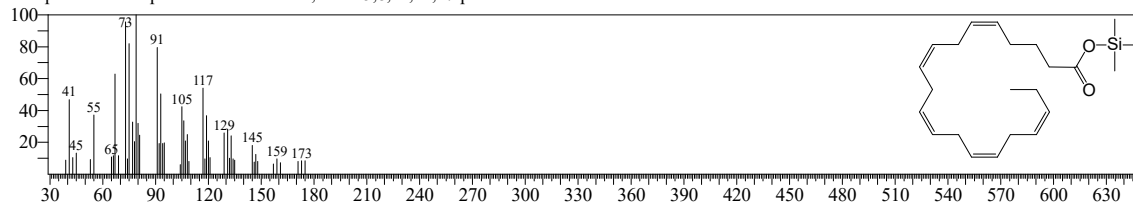

Hit#:4 Entry:25 Library:FA\_ME\_SP2560\_EI\_V3.lib

SI:15 Formula:C19H32O2 CAS:463-40-1 MolWeight:292 RetIndex:2892

CompName:Methyl linolenate ; (9Z,12Z,15Z)-octadeca-9,12,15-trienoic acid

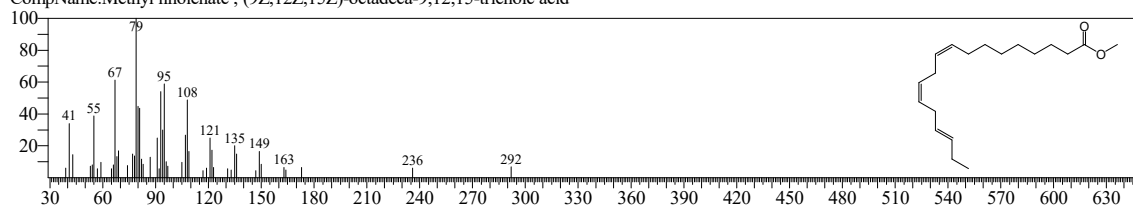

Hit#:5 Entry:29 Library:FA\_ME\_SP2560\_EI\_V3.lib

SI:14 Formula:C21H36O2 CAS:1783-84-2 MolWeight:320 RetIndex:3049

CompName:Methyl eicosa-8,11,14-trienoate ; Icosa-8,11,14-trienoic acid

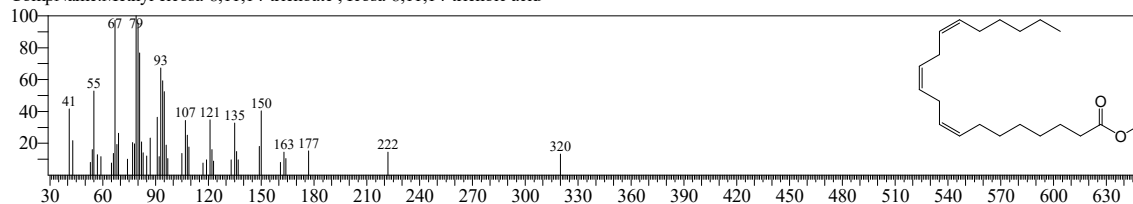



# TNAU

<< Target >>

Line# 8 R.Time: 28.285 (Scan#: 4658) MassPeaks: 439

RawMode: Averaged 28.280-28.290 (4657-4659) BasePeak: 73.05 (2118)

BG Mode: Calc. from Peak Group 1 - Event 1 Q3 Scan

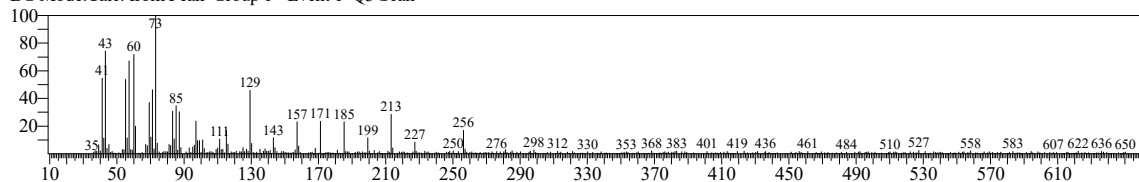

Hit#1 Entry: 31600 Library: NIST20R.lib

SI: 93 Formula: C<sub>16</sub>H<sub>32</sub>O<sub>2</sub> CAS: 57-10-3 MolWeight: 256 RetIndex: 1968

CompName: n-Hexadecanoic acid \$ Hexadecanoic acid \$ n-Hexadecic acid \$ Palmitic acid \$ Pentadecanecarboxylic acid \$ 1-Pentadecanecarboxylic

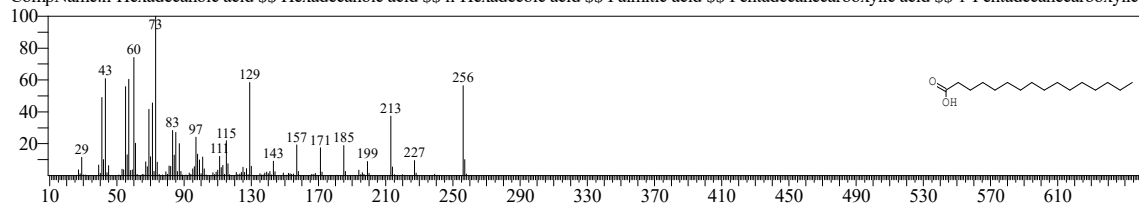

Hit#2 Entry: 29890 Library: NIST20R.lib

SI: 90 Formula: C<sub>15</sub>H<sub>30</sub>O<sub>2</sub> CAS: 1002-84-2 MolWeight: 242 RetIndex: 1869

CompName: Pentadecanoic acid \$ Pentadecylic acid \$ n-Pentadecanoic acid \$ n-Pentadecylic acid

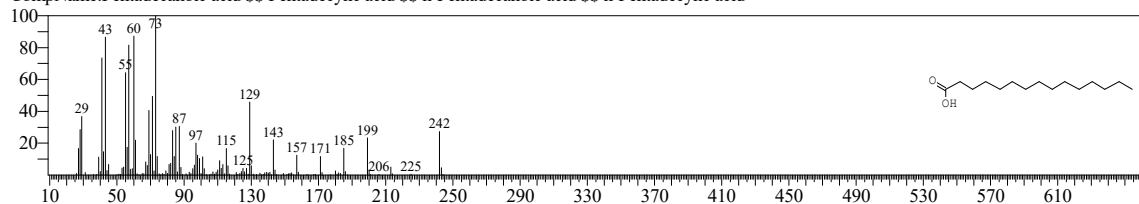

Hit#3 Entry: 44286 Library: NIST20M2.lib

SI: 90 Formula: C<sub>38</sub>H<sub>68</sub>O<sub>8</sub> CAS: 28474-90-0 MolWeight: 652 RetIndex: 4765

CompName: l-(+)-Ascorbic acid 2,6-dihexadecanoate

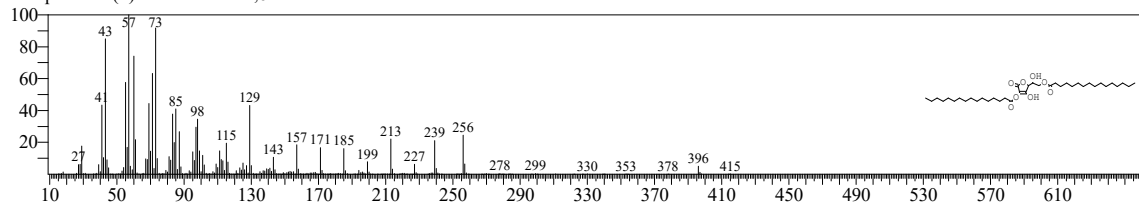

Hit#4 Entry: 25643 Library: NIST20R.lib

SI: 89 Formula: C<sub>13</sub>H<sub>26</sub>O<sub>2</sub> CAS: 638-53-9 MolWeight: 214 RetIndex: 1670

CompName: Tridecanoic acid \$ n-Tridecanoic acid \$ n-Tridecoic acid \$ Tridecyl acid

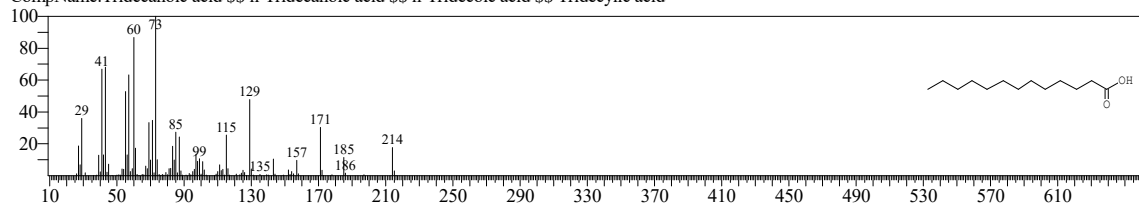

Hit#5 Entry: 144781 Library: NIST20M1.lib

SI: 89 Formula: C<sub>18</sub>H<sub>36</sub>O<sub>2</sub> CAS: 57-11-4 MolWeight: 284 RetIndex: 2167

CompName: Octadecanoic acid \$ Stearic acid \$ n-Octadecanoic acid \$ Humko Industriene R \$ Hydrofol Acid 150 \$ Hystrene S-97 \$ Hystrene T-70 \$

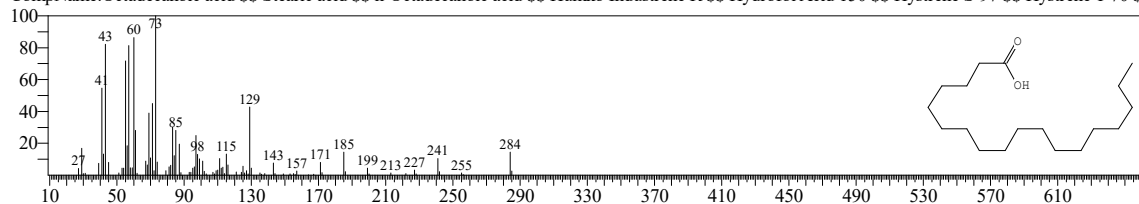

# TNAU

<< Target >>

Line#9 R.Time:31.580(Scan#:5317) MassPeaks:404

RawMode:Averaged 31.575-31.585(5316-5318) BasePeak:55.05(936)

BG Mode:Calc. from Peak Group 1 - Event 1 Q3 Scan

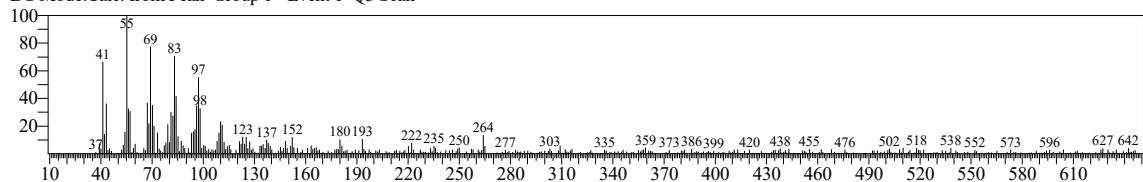

Hit#1 Entry:34243 Library:NIST20R.lib

SI:89 Formula:C18H34O2 CAS:112-79-8 MolWeight:282 RetIndex:2175

CompName:9-Octadecenoic acid, (E)- \$\$ trans-.delta.(sup 9)-Octadecenoic acid \$\$ trans-.delta.9-Octadecenoic acid \$\$ trans-Octadec-9-enoic acid \$\$ trans-

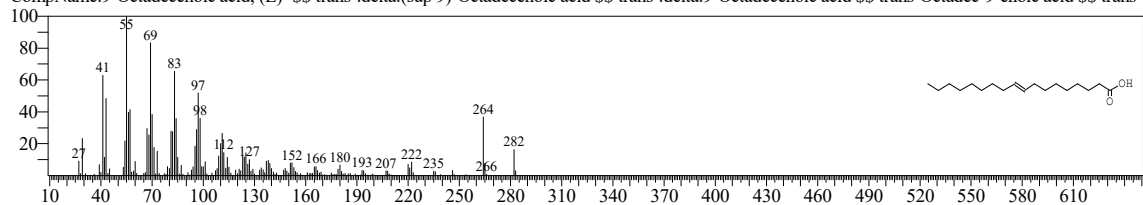

Hit#2 Entry:34244 Library:NIST20R.lib

SI:88 Formula:C18H34O2 CAS:112-80-1 MolWeight:282 RetIndex:2175

CompName:Oleic Acid \$\$ 9-Octadecenoic acid (Z)- \$\$.DELTA.9-cis-Oleic acid \$\$ cis-Oleic Acid \$\$ cis-9-Octadecenoic Acid \$\$ Emersol 211 \$\$ Emersol :

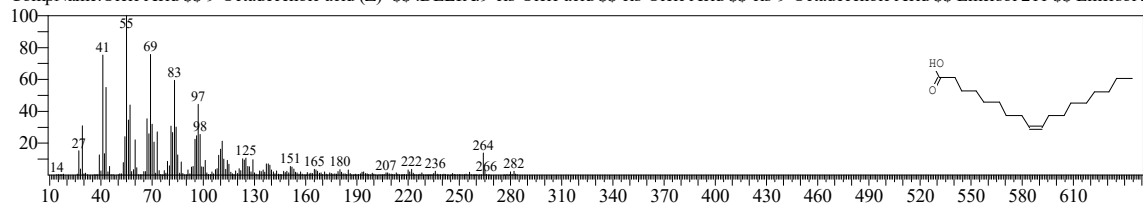

Hit#3 Entry:142103 Library:NIST20M1.lib

SI:87 Formula:C18H34O2 CAS:593-39-5 MolWeight:282 RetIndex:2175

CompName:6-Octadecenoic acid, (Z)- \$\$ (6Z)-6-Octadecenoic acid # \$\$ cis- -6-Octadecenoic acid \$\$ (Z)-Octadec-6-enoic acid \$\$ Petroselinic acid

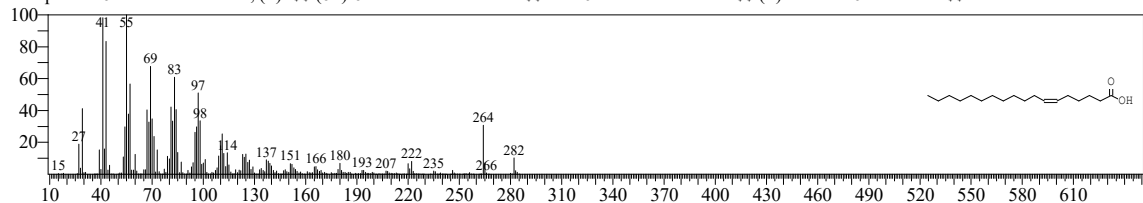

Hit#4 Entry:142158 Library:NIST20M1.lib

SI:87 Formula:C18H34O2 CAS:506-17-2 MolWeight:282 RetIndex:2175

CompName:cis-Vaccenic acid \$\$ 11-Octadecenoic acid, (Z)- \$\$ (Z)-11-Octadecenoic acid

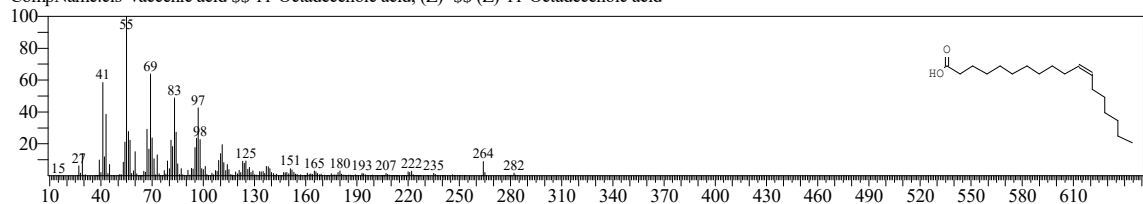

Hit#5 Entry:94376 Library:NIST20M1.lib

SI:87 Formula:C15H28O2 CAS:4727-18-8 MolWeight:240 RetIndex:2158

CompName:Cyclopentadecanone, 2-hydroxy- \$\$ 2-Hydroxycyclopentadecanone #

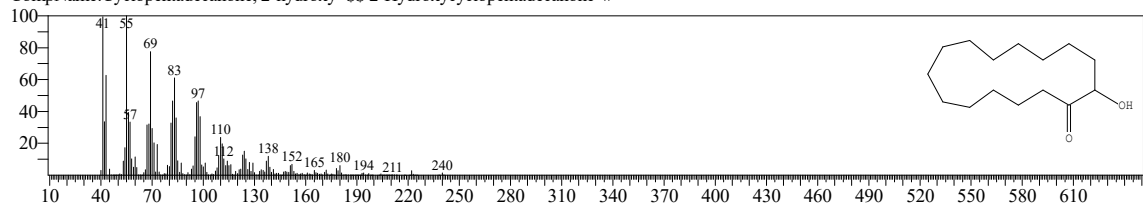

# TNAU

<< Target >>

Line#:10 R.Time:45.580(Scan#:8117) MassPeaks:392

RawMode:Averaged 45.575-45.585(8116-8118) BasePeak:139.15(4990)

BG Mode:Calc. from Peak Group 1 - Event 1 Q3 Scan

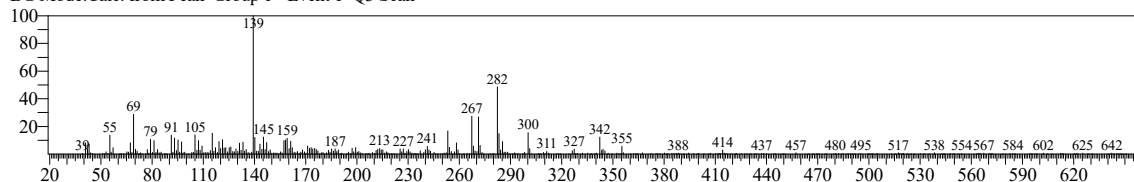

Hit#:1 Entry:8297 Library:NIST20M2.lib

SI:91 Formula:C27H42O3 CAS:512-04-9 MolWeight:414 RetIndex:2844

CompName:Diosgenin \$\$ Spirost-5-en-3-ol, (3.beta.,25R)- \$\$ Spirost-5-en-3.beta.-ol, (25R)- \$\$ Nitrogenin \$\$ 25D-spirost-5-en-3.beta.-ol \$\$ Spiro(8H-nap

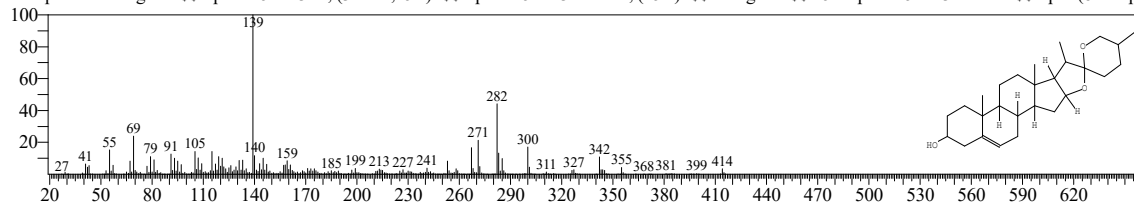

Hit#:2 Entry:14852 Library:NIST20M2.lib

SI:82 Formula:C28H44O3 CAS:116292-24-1 MolWeight:428 RetIndex:2793

CompName:Diosgenin methyl ether \$\$ Diosgenin Me derivative \$\$ (3.beta.,25R)-3-Methoxyspirost-5-ene \$\$ Spirost-5-ene, 3-methoxy-, (3.beta.,25R)-

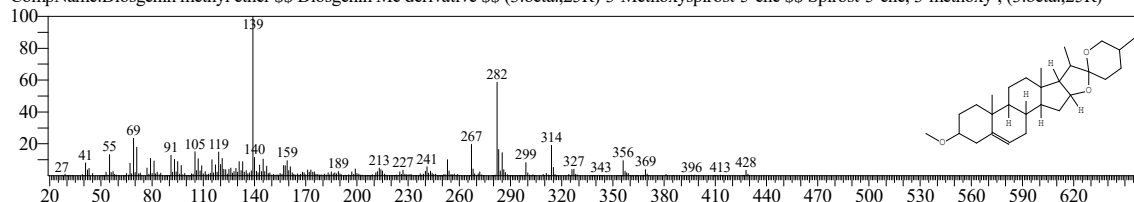

Hit#:3 Entry:41561 Library:NIST20R.lib

SI:81 Formula:C27H42O2 CAS:32277-73-9 MolWeight:398 RetIndex:2713

CompName:Des-N-solasodine \$\$ Furosta-5,20(22)-dien-3-ol #

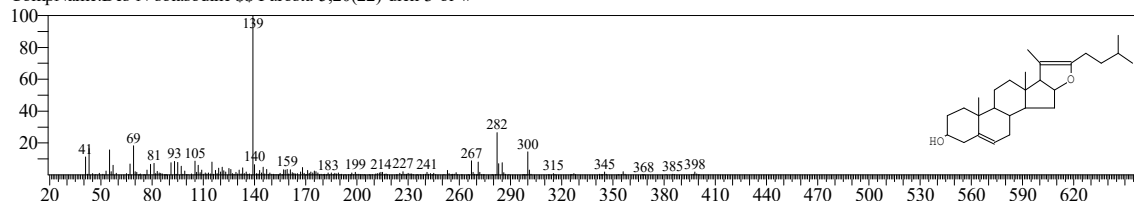

Hit#:4 Entry:24878 Library:NIST20M2.lib

SI:79 Formula:C29H44O4 CAS:1061-54-7 MolWeight:456 RetIndex:2984

CompName:Spirost-5-en-3-ol, acetate, (3.beta.,25R)- \$\$ Diosgenin acetate \$\$ Spirost-5-en-3.beta.-ol, acetate, (25R)- \$\$ Spirost-5-en-3.beta.-ol, acetate, (2

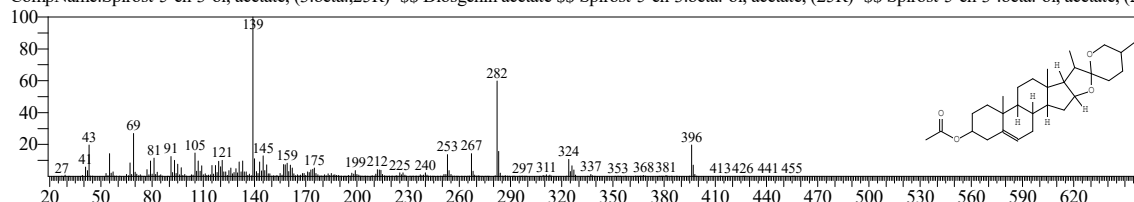

Hit#:5 Entry:42677 Library:NIST20R.lib

SI:76 Formula:C29H44O4 CAS:1180-12-7 MolWeight:456 RetIndex:2984

CompName:Neodiosgenin (3.beta.,25S) acetate \$\$ Spirost-5-en-3-ol, 3-acetate, (3.beta.,25S)- \$\$ Spirost-5-en-3-ol, acetate, (3.beta.,25S)- \$\$ Spirost-5-en-3

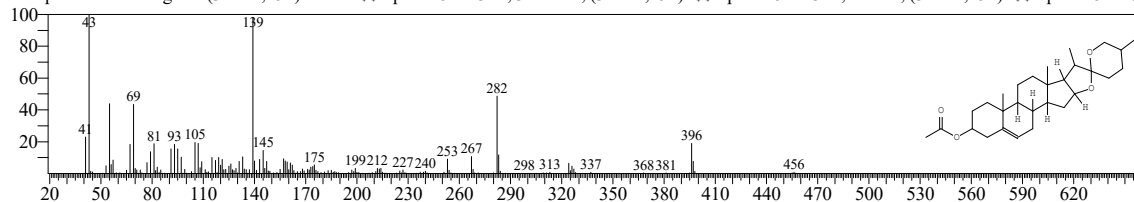

Supplement: Supplementary file 19 [file supplementary]
