# Supplementary material for: Comparative Metabolomics Profiling Reveals Key Metabolites and Associated Pathways Regulating Tuber Dormancy in White Yam (<em>Dioscorea rotundata</em>)
Source: Preprints.org preprint supplement (doi:10.20944/preprints202303.0378.v1), 2023-03-21

# TNAU

## Sample Information

Analyzed by : Admin  
 Analyzed : 04-Aug-22 6:51:16 PM  
 Sample Type : Unknown  
 Level # : 1  
 Sample Name : C42-3  
 Sample ID : C42-3  
 IS Amount : [1]=1  
 Sample Amount : 1  
 Dilution Factor : 1  
 Vial # : 4  
 Injection Volume : 1.00  
 Data File : D:\GCMS-8040NX\Aug 2022\Users\04.08.2022\Data files\04082022-004.qgd  
 Org Data File : D:\GCMS-8040NX\Aug 2022\Users\04.08.2022\Data files\04082022-004.qgd  
 Method File : D:\GCMS-8040NX\Aug 2022\Users\04.08.2022\Method file\27072022\_methodfile.qgm  
 Org Method File : D:\GCMS-8040NX\Aug 2022\Users\04.08.2022\Method file\27072022\_methodfile.qgm  
 Report File :  
 Tuning File : D:\GCMS-8040NX\Aug 2022\Tuning Data\TUNING 04082022.qgt  
 [Comment]  
 Jerry samples  
 Modified by : Admin  
 Modified : 05-Aug-22 4:13:13 PM

Chromatogram C42-3 D:\GCMS-8040NX\Aug 2022\Users\04.08.2022\Data files\04082022-004.qgd

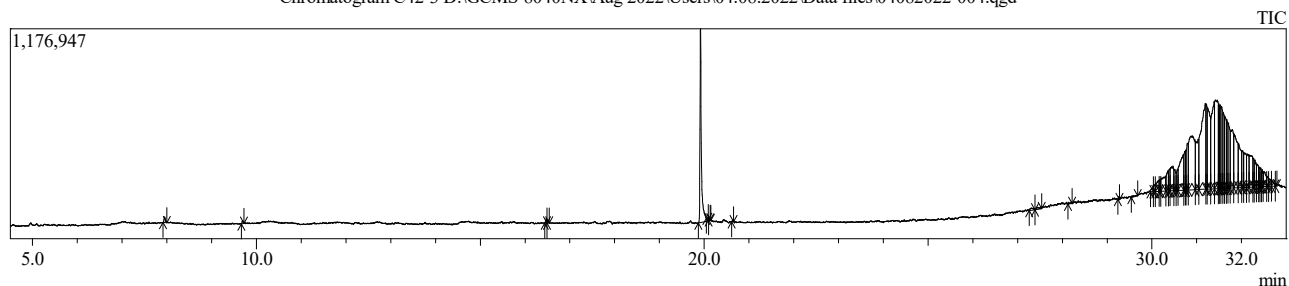

Peak Report TIC

| Peak# | R.Time | Area    | Area% | Height  | Height% | A/H  | Similarity | Name                                          |
|-------|--------|---------|-------|---------|---------|------|------------|-----------------------------------------------|
| 1     | 7.947  | 61361   | 0.16  | 30701   | 0.27    | 2.00 | 90         | Undecane                                      |
| 2     | 9.692  | 30086   | 0.08  | 17938   | 0.16    | 1.68 | 85         | Undecane                                      |
| 3     | 16.471 | 41881   | 0.11  | 23557   | 0.20    | 1.78 | 83         | 2,2,4-Trimethyl-1,3-pentanediol diisobutyrate |
| 4     | 16.525 | 26214   | 0.07  | 9270    | 0.08    | 2.83 | 47         | Methyl cis-10-heptadecenoate                  |
| 5     | 19.918 | 2396197 | 6.08  | 1085755 | 9.42    | 2.21 | 99         | Dimethyl palmitamine                          |
| 6     | 20.080 | 4546    | 0.01  | 5046    | 0.04    | 0.90 | 37         | Octanoic acid-TMS                             |
| 7     | 20.120 | 9792    | 0.02  | 7076    | 0.06    | 1.38 | 36         | Epinephrine-3TMS                              |
| 8     | 20.637 | 13454   | 0.03  | 10663   | 0.09    | 1.26 | 74         | Tetradecane, 1-bromo-                         |
| 9     | 27.275 | 58568   | 0.15  | 8996    | 0.08    | 6.51 | 32         | 3-Hydroxyanthranilic acid-2TMS                |
| 10    | 27.395 | 52826   | 0.13  | 7922    | 0.07    | 6.67 | 28         | 4-Hydroxybenzoic acid-2TMS                    |
| 11    | 28.203 | 30939   | 0.08  | 10128   | 0.09    | 3.05 | 37         | Glycerol-3TMS                                 |
| 12    | 29.255 | 18652   | 0.05  | 15989   | 0.14    | 1.17 | 46         | Arabinose-4TMS(2)                             |
| 13    | 29.555 | 35163   | 0.09  | 8524    | 0.07    | 4.13 | 28         | Hypoxanthine-2TMS                             |
| 14    | 29.980 | 66207   | 0.17  | 14809   | 0.13    | 4.47 | 37         | Lactitol-9TMS                                 |
| 15    | 30.050 | 82983   | 0.21  | 40069   | 0.35    | 2.07 | 36         | Maltitol-9TMS                                 |
| 16    | 30.115 | 259658  | 0.66  | 55222   | 0.48    | 4.70 | 37         | Sucrose-8TMS                                  |
| 17    | 30.170 | 129133  | 0.33  | 65117   | 0.57    | 1.98 | 29         | Sucrose-8TMS                                  |
| 18    | 30.205 | 511827  | 1.30  | 71876   | 0.62    | 7.12 | 34         | Sucrose-8TMS                                  |
| 19    | 30.355 | 328713  | 0.83  | 113055  | 0.98    | 2.91 | 49         | Sucrose-8TMS                                  |
| 20    | 30.385 | 283495  | 0.72  | 119302  | 1.04    | 2.38 | 36         | Trehalose-8TMS                                |
| 21    | 30.469 | 659539  | 1.67  | 137429  | 1.19    | 4.80 | 48         | Sucrose-8TMS                                  |
| 22    | 30.515 | 330469  | 0.84  | 116727  | 1.01    | 2.83 | 53         | Sucrose-8TMS                                  |

# TNAU

| Peak# | R.Time | Area     | Area%  | Height   | Height% | A/H  | Similarity | Name                          |
|-------|--------|----------|--------|----------|---------|------|------------|-------------------------------|
| 23    | 30.560 | 266398   | 0.68   | 114997   | 1.00    | 2.32 | 35         | Maltitol-9TMS                 |
| 24    | 30.695 | 1353145  | 3.43   | 197721   | 1.72    | 6.84 | 28         | Sucrose-8TMS                  |
| 25    | 30.730 | 382648   | 0.97   | 217426   | 1.89    | 1.76 | 39         | Maltitol-9TMS                 |
| 26    | 30.755 | 265076   | 0.67   | 224448   | 1.95    | 1.18 | 25         | Ribose-4TMS(1)                |
| 27    | 30.790 | 678014   | 1.72   | 259661   | 2.25    | 2.61 | 42         | Maltitol-9TMS                 |
| 28    | 30.899 | 2764479  | 7.01   | 302957   | 2.63    | 9.12 | 62         | Sucrose-8TMS                  |
| 29    | 31.030 | 1221332  | 3.10   | 283106   | 2.46    | 4.31 | 33         | Lactose-meto-8TMS(1)          |
| 30    | 31.191 | 3686105  | 9.35   | 481049   | 4.17    | 7.66 | 54         | Trehalose-8TMS                |
| 31    | 31.220 | 702912   | 1.78   | 476304   | 4.13    | 1.48 | 46         | Sucrose-8TMS                  |
| 32    | 31.255 | 2189496  | 5.55   | 449413   | 3.90    | 4.87 | 39         | Fructose-5TMS(3)              |
| 33    | 31.390 | 2287183  | 5.80   | 489836   | 4.25    | 4.67 | 44         | Sucrose-8TMS                  |
| 34    | 31.417 | 2494310  | 6.33   | 497212   | 4.32    | 5.02 | 41         | Sucrose-8TMS                  |
| 35    | 31.495 | 839316   | 2.13   | 475193   | 4.12    | 1.77 | 40         | Sucrose-8TMS                  |
| 36    | 31.526 | 690876   | 1.75   | 469482   | 4.07    | 1.47 | 53         | Sucrose-8TMS                  |
| 37    | 31.560 | 1197406  | 3.04   | 456754   | 3.96    | 2.62 | 52         | Maltitol-9TMS                 |
| 38    | 31.595 | 867791   | 2.20   | 424503   | 3.68    | 2.04 | 50         | Arabinose-4TMS(1)             |
| 39    | 31.625 | 945474   | 2.40   | 404888   | 3.51    | 2.34 | 39         | Sucrose-8TMS                  |
| 40    | 31.670 | 785189   | 1.99   | 386883   | 3.36    | 2.03 | 37         | Isomaltose-meto-8TMS(2)       |
| 41    | 31.710 | 1133865  | 2.88   | 366358   | 3.18    | 3.09 | 55         | Maltitol-9TMS                 |
| 42    | 31.795 | 1524653  | 3.87   | 327554   | 2.84    | 4.65 | 52         | Maltitol-9TMS                 |
| 43    | 31.840 | 1622504  | 4.12   | 301409   | 2.62    | 5.38 | 57         | Maltitol-9TMS                 |
| 44    | 31.940 | 994511   | 2.52   | 245508   | 2.13    | 4.05 | 45         | Maltitol-9TMS                 |
| 45    | 32.030 | 482635   | 1.22   | 205634   | 1.78    | 2.35 | 34         | Psicose-5TMS(2)               |
| 46    | 32.100 | 791802   | 2.01   | 187820   | 1.63    | 4.22 | 38         | Trehalose-8TMS                |
| 47    | 32.160 | 599679   | 1.52   | 182574   | 1.58    | 3.28 | 35         | Sucrose-8TMS                  |
| 48    | 32.245 | 886608   | 2.25   | 172172   | 1.49    | 5.15 | 55         | Sucrose-8TMS                  |
| 49    | 32.275 | 282062   | 0.72   | 159681   | 1.39    | 1.77 | 40         | Dopa-4TMS                     |
| 50    | 32.305 | 414674   | 1.05   | 150147   | 1.30    | 2.76 | 41         | Psicose-5TMS(2)               |
| 51    | 32.365 | 359501   | 0.91   | 121276   | 1.05    | 2.96 | 45         | Sucrose-8TMS                  |
| 52    | 32.395 | 159089   | 0.40   | 111413   | 0.97    | 1.43 | 41         | Sucrose-8TMS                  |
| 53    | 32.430 | 233320   | 0.59   | 107499   | 0.93    | 2.17 | 33         | Xanthosine monophosphate-6TMS |
| 54    | 32.462 | 179322   | 0.45   | 96600    | 0.84    | 1.86 | 41         | Sucrose-8TMS                  |
| 55    | 32.503 | 339482   | 0.86   | 84168    | 0.73    | 4.03 | 48         | Psicose-5TMS(2)               |
| 56    | 32.590 | 119150   | 0.30   | 50198    | 0.44    | 2.37 | 39         | Sucrose-8TMS                  |
| 57    | 32.645 | 136659   | 0.35   | 37613    | 0.33    | 3.63 | 35         | Psicose-5TMS(2)               |
| 58    | 32.745 | 97190    | 0.25   | 16844    | 0.15    | 5.77 | 30         | Epinephrine-3TMS              |
| 59    | 32.775 | 13138    | 0.03   | 10888    | 0.09    | 1.21 | 33         | Ribose-4TMS(3)                |
|       |        | 39418697 | 100.00 | 11522360 | 100.00  |      |            |                               |

Library

# TNAU

<< Target >>

Line#:1 R.Time:7.945(Scan#:690) MassPeaks:293

RawMode:Averaged 7.940-7.950(689-691) BasePeak:57.10(7357)

BG Mode:Calc. from Peak Group 1 - Event 1 Q3 Scan

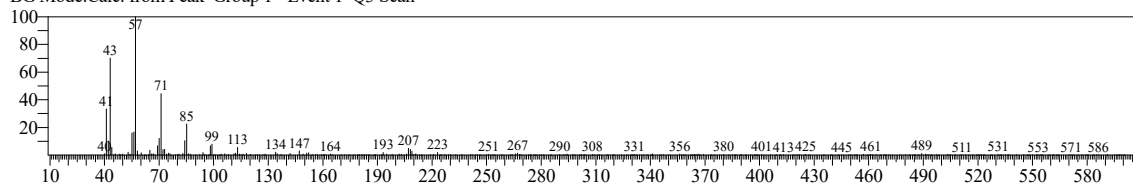

Hit#:1 Entry:21042 Library:NIST20M1.lib

SI:90 Formula:C11H24 CAS:1120-21-4 MolWeight:156 RetIndex:1100

CompName:Undecane \$\$ n-Undecane \$\$ Hendecane \$\$ n-C11H24 \$\$ UN 2330

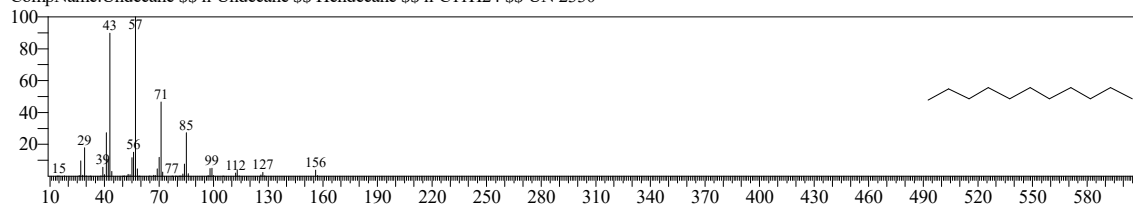

Hit#:2 Entry:30057 Library:NIST20M1.lib

SI:89 Formula:C12H26 CAS:112-40-3 MolWeight:170 RetIndex:1200

CompName:Dodecane \$\$ n-Dodecane \$\$ Adakane 12 \$\$ Ba 51-090453 \$\$ CH3(CH2)10CH3 \$\$ Bihexyl \$\$ Dihexyl \$\$ Duodecane \$\$ NSC 8714

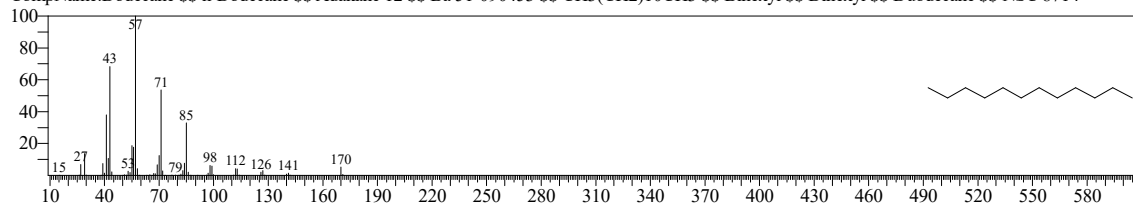

Hit#:3 Entry:13631 Library:NIST20M1.lib

SI:89 Formula:C10H22 CAS:15869-93-9 MolWeight:142 RetIndex:887

CompName:Octane, 3,5-dimethyl- \$\$ 3,5-Dimethyloctane

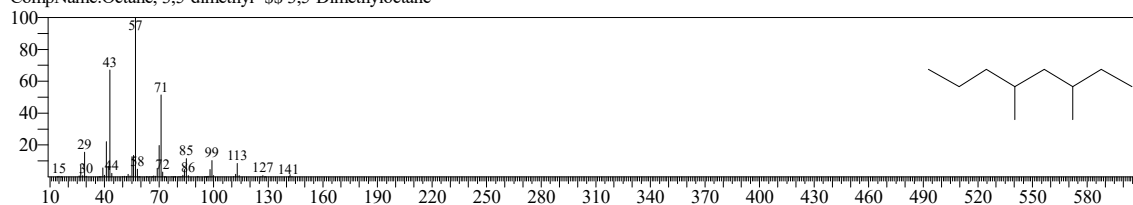

Hit#:4 Entry:40226 Library:NIST20M1.lib

SI:89 Formula:C13H28 CAS:629-50-5 MolWeight:184 RetIndex:1300

CompName:Tridecane \$\$ n-Tridecane \$\$ Tridecane, n-

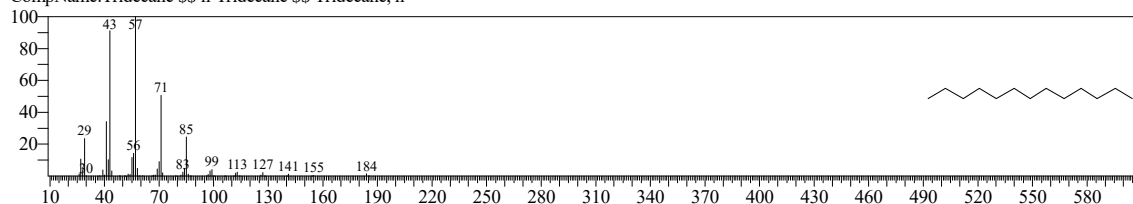

Hit#:5 Entry:40271 Library:NIST20M1.lib

SI:89 Formula:C13H28 CAS:17312-82-2 MolWeight:184 RetIndex:1185

CompName:Undecane, 4,6-dimethyl- \$\$ 4,6-Dimethylundecane #

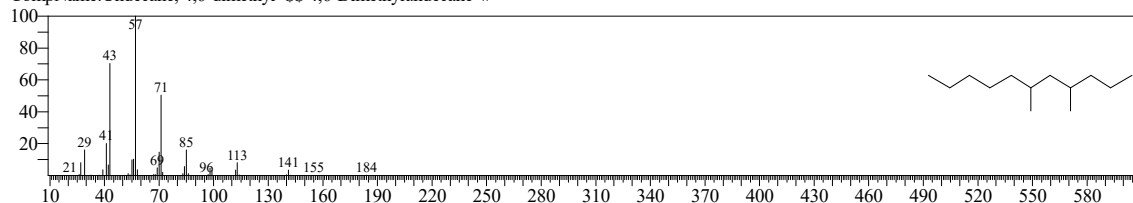

# TNAU

<< Target >>

Line# 2 R.Time: 9.690 (Scan#: 1039) MassPeaks: 287

RawMode: Averaged 9.685-9.695 (1038-1040) BasePeak: 57.10 (4053)

BG Mode: Calc. from Peak Group 1 - Event 1 Q3 Scan

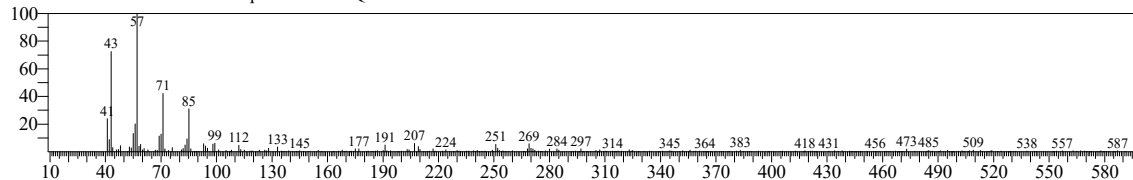

Hit#1 Entry: 21042 Library: NIST20M1.lib

SI: 85 Formula: C<sub>11</sub>H<sub>24</sub> CAS: 1120-21-4 MolWeight: 156 RetIndex: 1100

CompName: Undecane \$\$ n-Undecane \$\$ Hendecane \$\$ n-C<sub>11</sub>H<sub>24</sub> \$\$ UN 2330

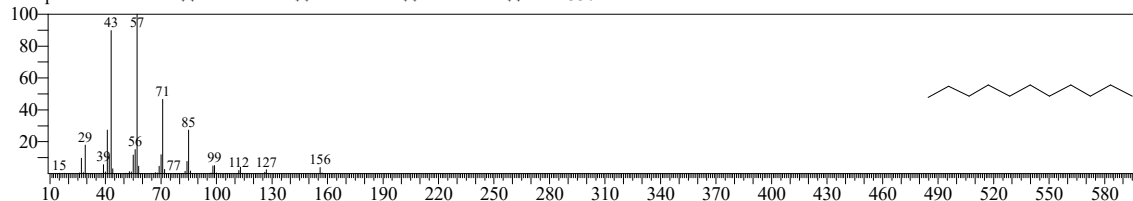

Hit#2 Entry: 30057 Library: NIST20M1.lib

SI: 85 Formula: C<sub>12</sub>H<sub>26</sub> CAS: 112-40-3 MolWeight: 170 RetIndex: 1200

CompName: Dodecane \$\$ n-Dodecane \$\$ Adakane 12 \$\$ Ba 51-090453 \$\$ CH<sub>3</sub>(CH<sub>2</sub>)<sub>10</sub>CH<sub>3</sub> \$\$ Bihexyl \$\$ Dihexyl \$\$ Duodecane \$\$ NSC 8714

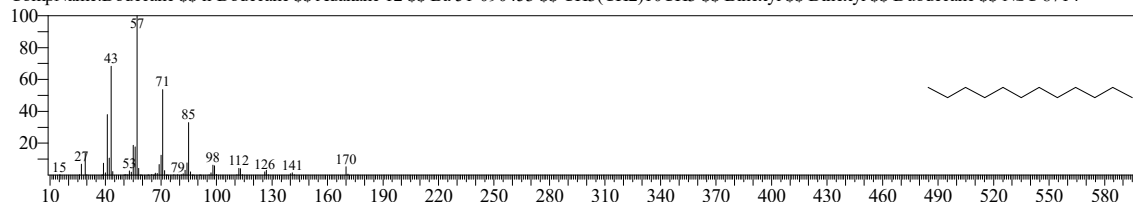

Hit#3 Entry: 19412 Library: NIST20R.lib

SI: 85 Formula: C<sub>13</sub>H<sub>28</sub> CAS: 629-50-5 MolWeight: 184 RetIndex: 1300

CompName: Tridecane \$\$ n-Tridecane \$\$ Tridecane, n-

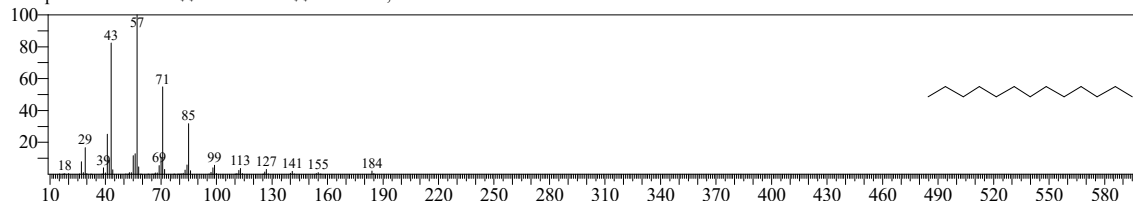

Hit#4 Entry: 27737 Library: NIST20R.lib

SI: 84 Formula: C<sub>16</sub>H<sub>34</sub> CAS: 544-76-3 MolWeight: 226 RetIndex: 1600

CompName: Hexadecane \$\$ n-Cetane \$\$ n-Hexadecane \$\$ Cetane

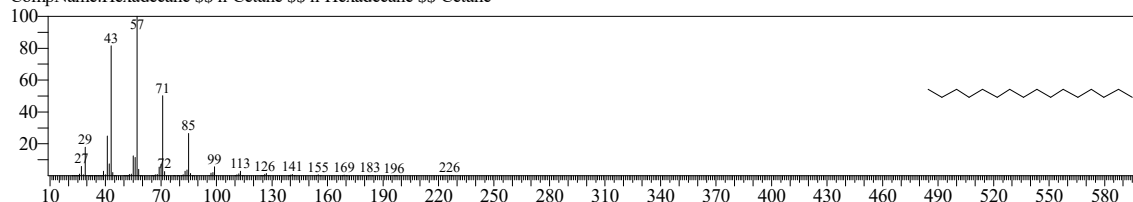

Hit#5 Entry: 251145 Library: NIST20M1.lib

SI: 84 Formula: C<sub>18</sub>H<sub>37</sub>Cl<sub>3</sub>Si CAS: 112-04-9 MolWeight: 386 RetIndex: 2249

CompName: Silane, trichlorooctadecyl- \$\$ Octadecyltrichlorosilane \$\$ Silane, octadecyltrichloro- \$\$ Trichlorooctadecylsilane \$\$ UN 1800 \$\$ CO9750

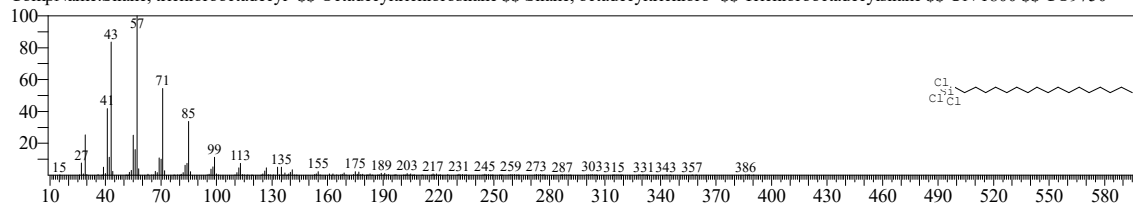

# TNAU

<< Target >>

Line#3 R.Time:16.470(Scan#:2395) MassPeaks:299

RawMode:Averaged 16.465-16.475(2394-2396) BasePeak:71.00(7026)

BG Mode:Calc. from Peak Group 1 - Event 1 Q3 Scan

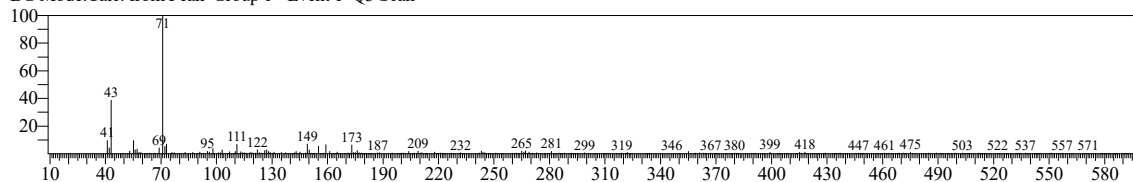

Hit#1 Entry:34622 Library:NIST20R.lib

SI:83 Formula:C16H30O4 CAS:6846-50-0 MolWeight:286 RetIndex:1605

CompName:2,2,4-Trimethyl-1,3-pentanediol diisobutyrate \$\$ Propanoic acid, 2-methyl-, 2,2-dimethyl-1-(1-methylethyl)-1,3-propanediol ester \$\$ 1,3-Pentan

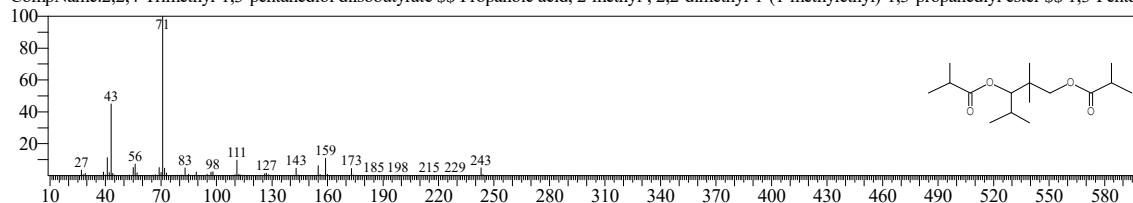

Hit#2 Entry:146809 Library:NIST20M1.lib

SI:77 Formula:C16H30O4 CAS:0-00-0 MolWeight:286 RetIndex:1605

CompName:Pentanoic acid, 2,2,4-trimethyl-3-carboxyisopropyl, isobutyl ester \$\$ 1-Isobutyl 4-isopropyl 3-isopropyl-2,2-dimethylsuccinate #

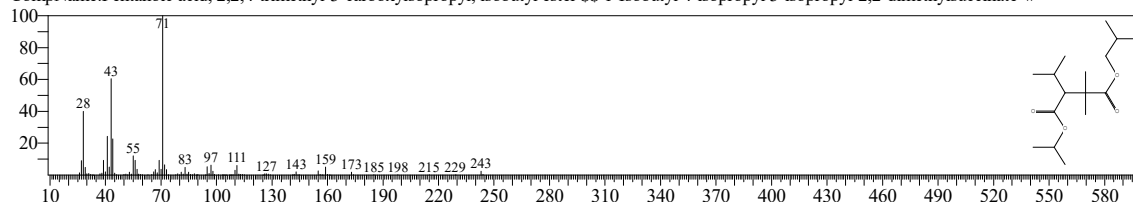

Hit#3 Entry:50931 Library:NIST20M1.lib

SI:77 Formula:C5H11I CAS:18295-27-7 MolWeight:198 RetIndex:804

CompName:Butane, 2-iodo-3-methyl- \$\$ 2-Iodo-3-methylbutane \$\$ Butane, 3-methyl-2-iodo

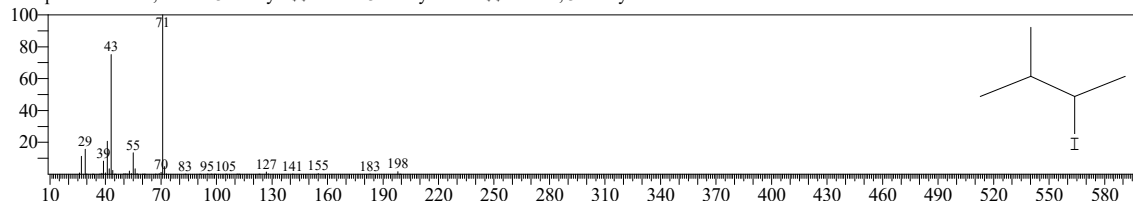

Hit#4 Entry:21815 Library:NIST20M1.lib

SI:76 Formula:C8H14O3 CAS:106-31-0 MolWeight:158 RetIndex:1120

CompName:Butanoic acid, anhydride \$\$ Butyric anhydride \$\$ n-Butyric acid anhydride \$\$ n-Butyric anhydride \$\$ Butanoic anhydride \$\$ Butyric acid anhy

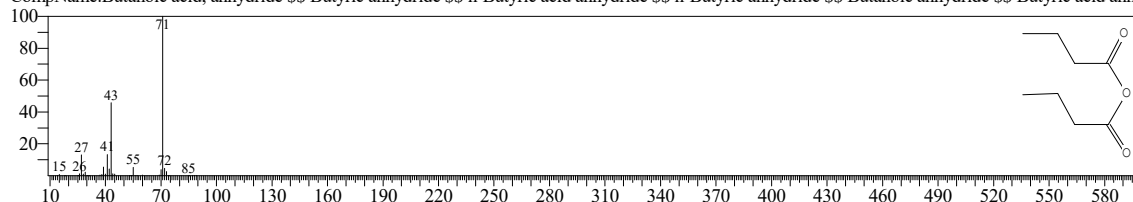

Hit#5 Entry:98508 Library:NIST20M1.lib

SI:75 Formula:C14H28OS CAS:2432-55-5 MolWeight:244 RetIndex:1800

CompName:Butyric acid, thio-, S-decyl ester \$\$ S-Decyl butanethioate #

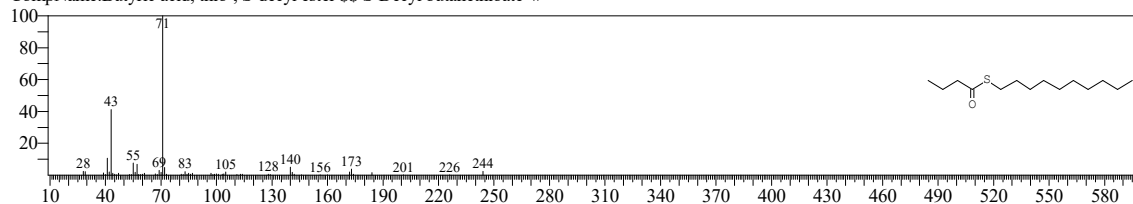

# TNAU

<< Target >>

Line#:4 R.Time:16.525(Scan#:2406) MassPeaks:295

RawMode:Averaged 16.520-16.530(2405-2407) BasePeak:44.00(679)

BG Mode:Calc. from Peak Group 1 - Event 1 Q3 Scan

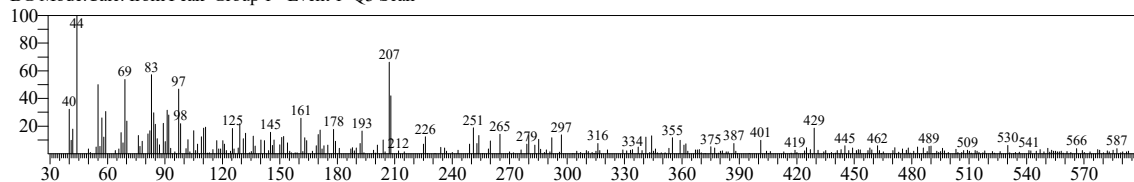

Hit#:1 Entry:15 Library:FA\_ME\_SP2560\_EI\_V3.lib

SI:47 Formula:C18H34O2 CAS:29743-97-3 MolWeight:282 RetIndex:2581

CompName:Methyl cis-10-heptadecenoate ; Heptadec-10-enoic acid

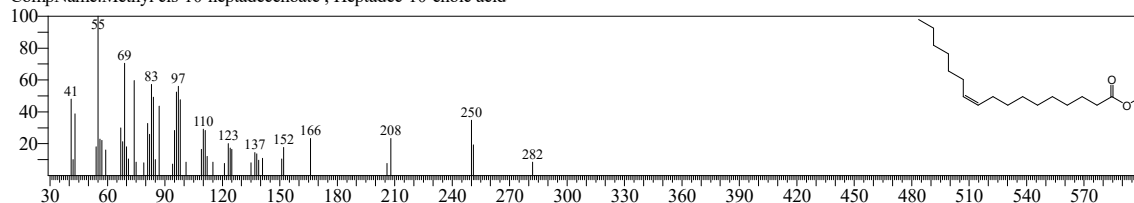

Hit#:2 Entry:24 Library:FA\_ME\_SP2560\_EI\_V3.lib

SI:47 Formula:C21H40O2 CAS:5561-99-9 MolWeight:324 RetIndex:2874

CompName:Methyl cis-11-icosenoate ; Icos-11-enoic acid

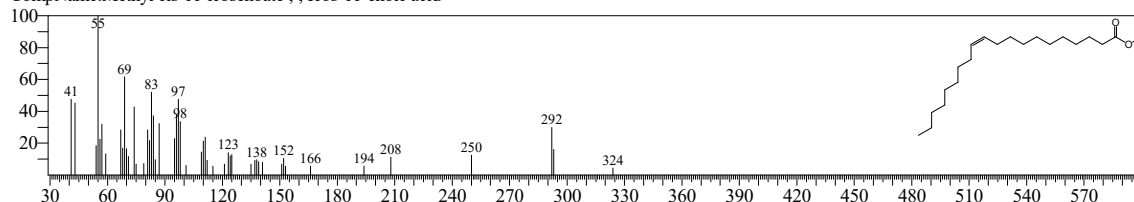

Hit#:3 Entry:11 Library:FA\_ME\_SP2560\_EI\_V3.lib

SI:44 Formula:C16H30O2 CAS:84743-29-3 MolWeight:254 RetIndex:2388

CompName:Methyl cis-10-pentadecenoate ; (Z)-pentadec-10-enoic acid

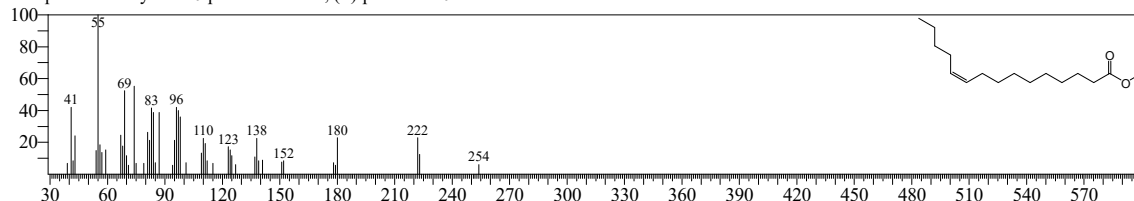

Hit#:4 Entry:9 Library:FA\_ME\_SP2560\_EI\_V3.lib

SI:44 Formula:C15H28O2 CAS:544-64-9 MolWeight:240 RetIndex:2283

CompName:Methyl myristoleate ; (Z)-tetradec-9-enoic acid

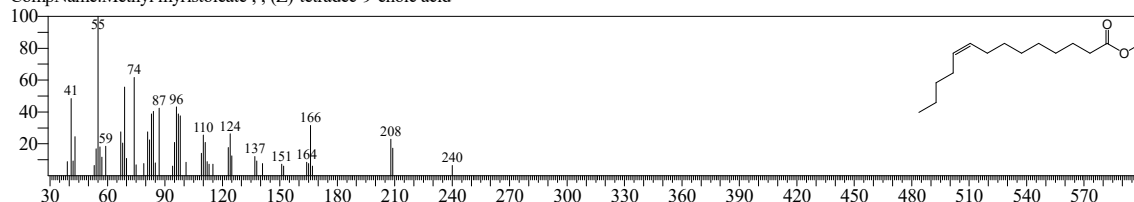

Hit#:5 Entry:18 Library:FA\_ME\_SP2560\_EI\_V3.lib

SI:44 Formula:C19H36O2 CAS:112-80-1 MolWeight:296 RetIndex:2675

CompName:Methyl oleate ; (Z)-octadec-9-enoic acid

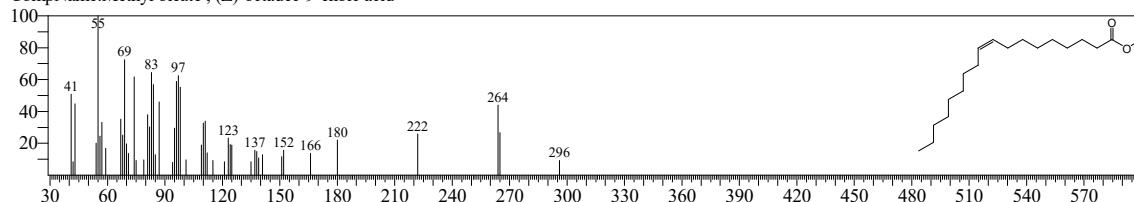

# TNAU

<< Target >>

Line#5 R.Time:19.920(Scan#:3085) MassPeaks:273

RawMode:Averaged 19.915-19.925(3084-3086) BasePeak:58.10(772146)

BG Mode:Calc. from Peak Group 1 - Event 1 Q3 Scan

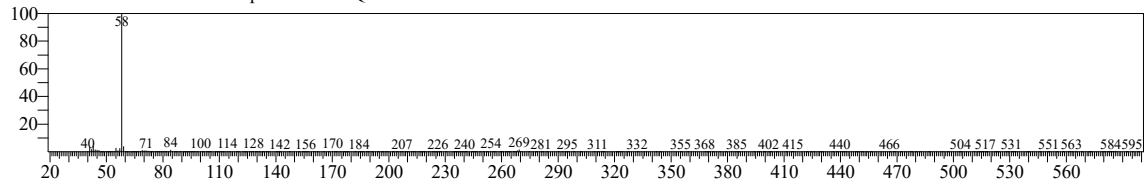

Hit#:1 Entry:32974 Library:NIST20R.lib

SI:99 Formula:C18H39N CAS:112-69-6 MolWeight:269 RetIndex:1860

CompName:Dimethyl palmitamine \$\$ 1-Hexadecanamine, N,N-dimethyl- \$\$ Cetyltrimethylamine \$\$ Armeen DM 16D \$\$ Dimethyl-n-hexadecylamine \$\$ D

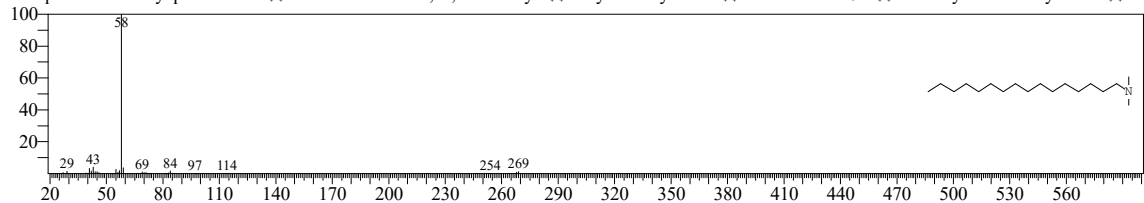

Hit#:2 Entry:110833 Library:NIST20M1.lib

SI:98 Formula:C17H37N CAS:17678-60-3 MolWeight:255 RetIndex:1760

CompName:1-Pentadecanamine, N,N-dimethyl- \$\$ N,N-Dimethyl-1-pentadecanamine #

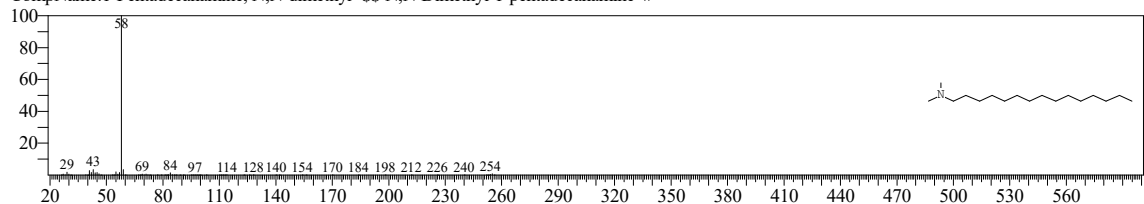

Hit#:3 Entry:160142 Library:NIST20M1.lib

SI:97 Formula:C20H43N CAS:124-28-7 MolWeight:297 RetIndex:2058

CompName:Dimantine \$\$ 1-Octadecanamine, N,N-dimethyl- \$\$ Octadecylamine, N,N-dimethyl- \$\$ Armeen DM 18D \$\$ Armine DM18D \$\$ Dimethyl-n-o

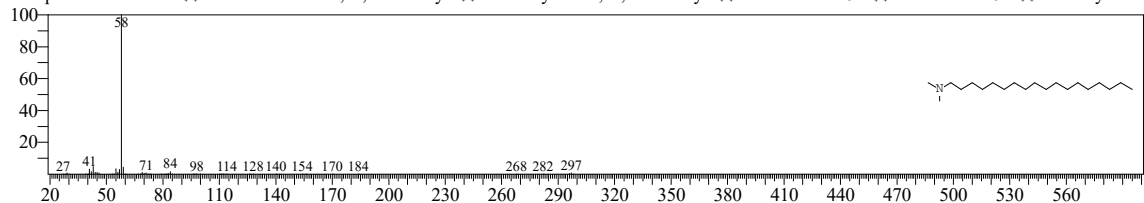

Hit#:4 Entry:80508 Library:NIST20M1.lib

SI:97 Formula:C15H33N CAS:17373-29-4 MolWeight:227 RetIndex:1561

CompName:1-Tridecanamine, N,N-dimethyl- \$\$ N,N-Dimethyl-1-tridecanamine #

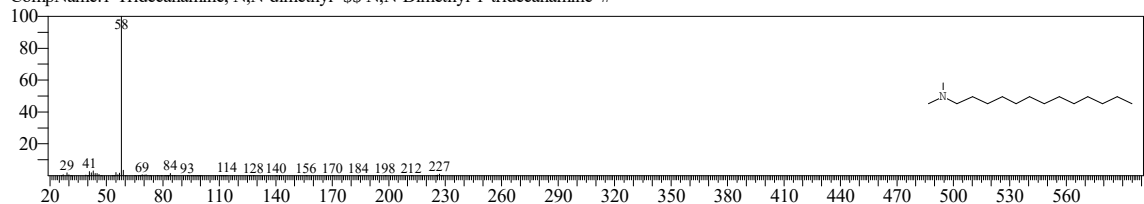

Hit#:5 Entry:176597 Library:NIST20M1.lib

SI:97 Formula:C21H45N CAS:49859-87-2 MolWeight:311 RetIndex:2158

CompName:1-Nonadecanamine, N,N-dimethyl- \$\$ N,N-Dimethyl-1-nonadecanamine #

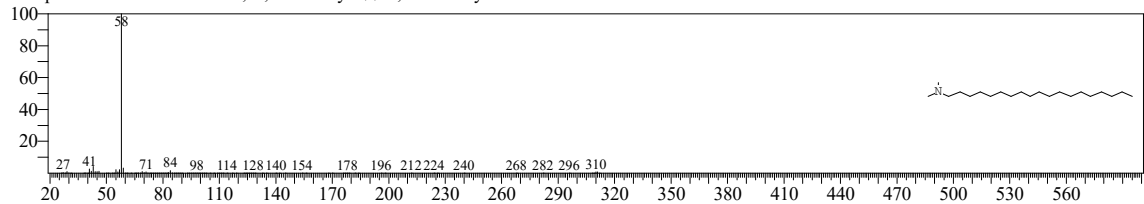

# TNAU

<< Target >>

Line#:6 R.Time:20.080(Scan#:3117) MassPeaks:263

RawMode:Averaged 20.075-20.085(3116-3118) BasePeak:207.05(628)

BG Mode:Calc. from Peak Group 1 - Event 1 Q3 Scan

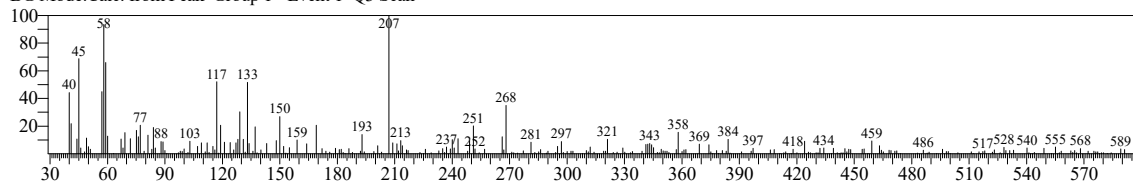

Hit#:1 Entry:70 Library:OA\_TMS\_DB5\_67min\_V3.lib

SI:37 Formula:C<sub>11</sub>H<sub>24</sub>O<sub>2</sub>Si CAS:124-07-2 MolWeight:216 RetIndex:1263

CompName:Octanoic acid-TMS ; octanoic acid

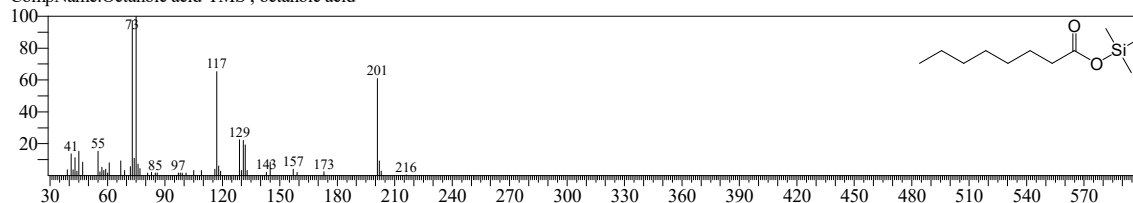

Hit#:2 Entry:331 Library:OA\_TMS\_DB5\_67min\_V3.lib

SI:37 Formula:C<sub>17</sub>H<sub>36</sub>O<sub>2</sub>Si CAS:544-63-8 MolWeight:300 RetIndex:1850

CompName:Myristic acid-TMS ; tetradecanoic acid

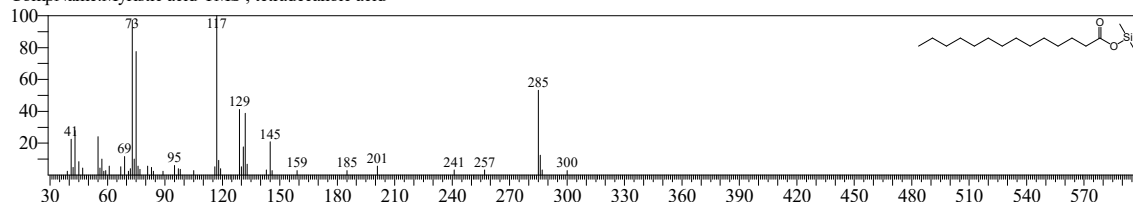

Hit#:3 Entry:221 Library:OA\_TMS\_DB5\_67min\_V3.lib

SI:36 Formula: CAS:0-00-0 MolWeight:275 RetIndex:1651

CompName:Lauric acid-d3-TMS ;

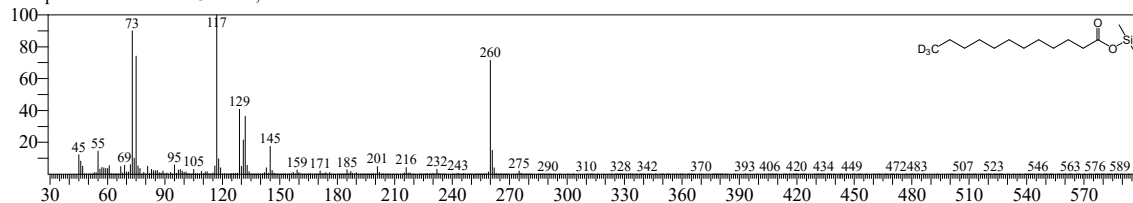

Hit#:4 Entry:223 Library:OA\_TMS\_DB5\_67min\_V3.lib

SI:35 Formula:C<sub>15</sub>H<sub>32</sub>O<sub>2</sub>Si CAS:143-07-7 MolWeight:272 RetIndex:1653

CompName:Lauric acid-TMS ; dodecanoic acid

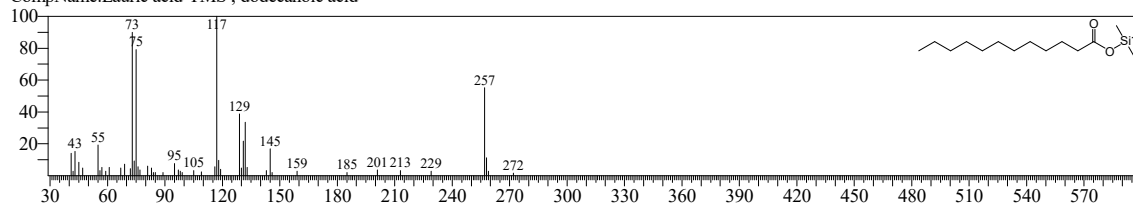

Hit#:5 Entry:491 Library:OA\_TMS\_DB5\_67min\_V3.lib

SI:35 Formula:C<sub>21</sub>H<sub>44</sub>O<sub>2</sub>Si CAS:57-11-4 MolWeight:356 RetIndex:2244

CompName:Stearic acid-TMS ; octadecanoic acid

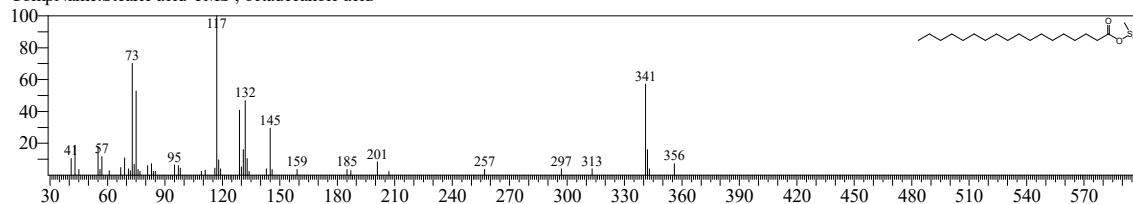



# TNAU

<< Target >>

Line#:7 R.Time:20.120(Scan#:3125) MassPeaks:287

RawMode:Averaged 20.115-20.125(3124-3126) BasePeak:207.00(1133)

BG Mode:Calc. from Peak Group 1 - Event 1 Q3 Scan

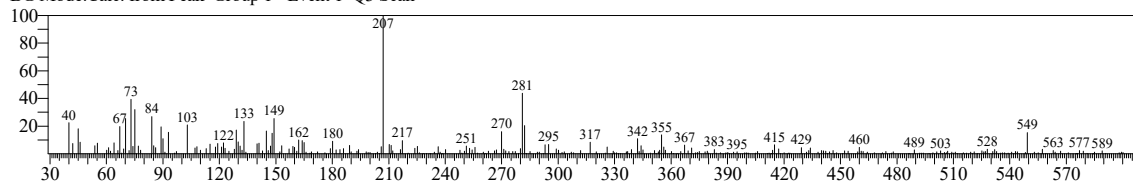

Hit#:1 Entry:343 Library:OA\_TMS\_DB5\_67min\_V3.lib

SI:36 Formula:C18H37NO3Si3 CAS:51-43-4 MolWeight:399 RetIndex:1868

CompName:Epinephrine-3TMS ; 4-[(1R)-1-hydroxy-2-(methylamino)ethyl]benzene-1,2-diol

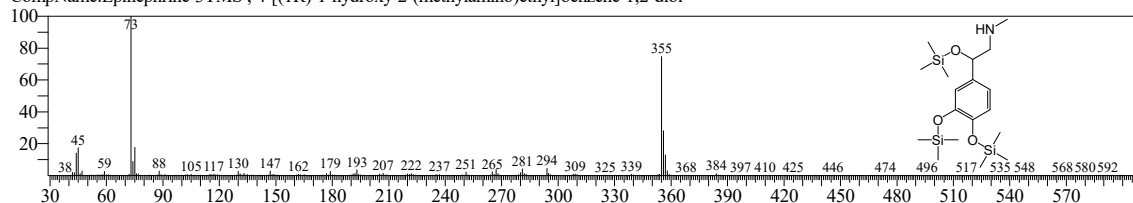

Hit#:2 Entry:548 Library:OA\_TMS\_DB5\_67min\_V3.lib

SI:35 Formula:C17H31NO3SSi2 CAS:2457-80-9 MolWeight:441 RetIndex:2787

CompName:5'-Methylthioadenosine-2TMS ; (2R,3R,4S,5S)-2-(6-aminopurin-9-yl)-5-(methylsulfanylmethyl)oxolane-3,4-diol

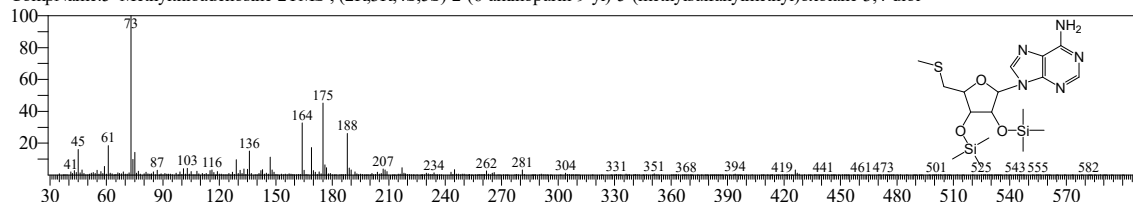

Hit#:3 Entry:81 Library:OA\_TMS\_DB5\_67min\_V3.lib

SI:35 Formula:C10H23NO4Si2 CAS:1113-60-6 MolWeight:277 RetIndex:1292

CompName:3-Hydroxypyruvic acid-meto-2TMS(1) ; 3-hydroxy-2-oxopropanoic acid

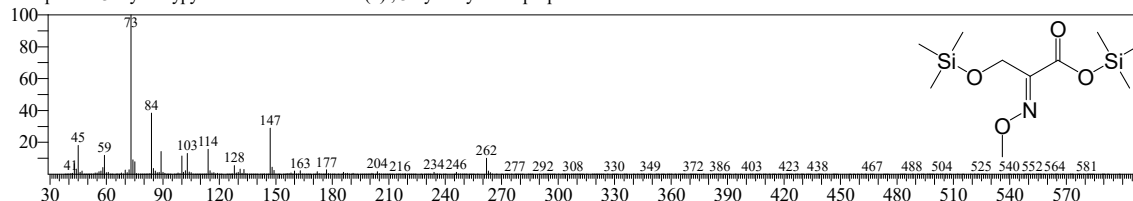

Hit#:4 Entry:384 Library:OA\_TMS\_DB5\_67min\_V3.lib

SI:35 Formula:C17H35NO3Si3 CAS:65-23-6 MolWeight:385 RetIndex:1919

CompName:Pyridoxine-3TMS ; 4,5-bis(hydroxymethyl)-2-methylpyridin-3-ol

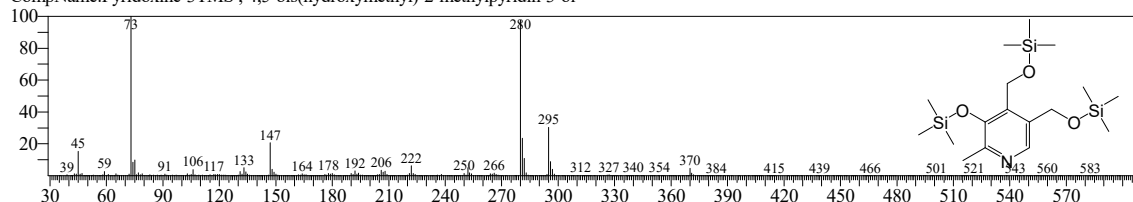

Hit#:5 Entry:300 Library:OA\_TMS\_DB5\_67min\_V3.lib

SI:34 Formula:C15H32O4Si2 CAS:123-99-9 MolWeight:332 RetIndex:1799

CompName:Azelaic acid-2TMS ; nonanedioic acid

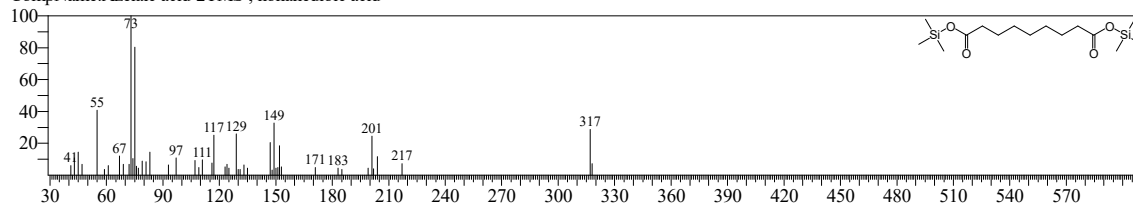

# TNAU

<< Target >>

Line#:8 R.Time:20.635(Scan#:3228) MassPeaks:249

RawMode:Averaged 20.630-20.640(3227-3229) BasePeak:43.05(1057)

BG Mode:Calc. from Peak Group 1 - Event 1 Q3 Scan

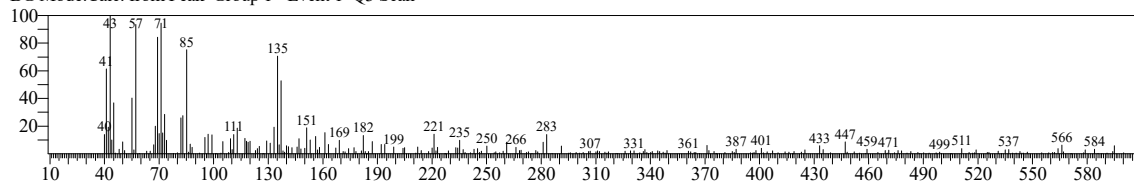

Hit#:1 Entry:33655 Library:NIST20R.lib

SI:74 Formula:C14H29Br CAS:112-71-0 MolWeight:276 RetIndex:1709

CompName:Tetradecane, 1-bromo- \$\$ n-Tetradecyl-1-bromide \$\$ Myristyl bromide \$\$ Tetradecyl bromide \$\$ 1-Bromotetradecane \$\$ 1-Tetradecyl bromide

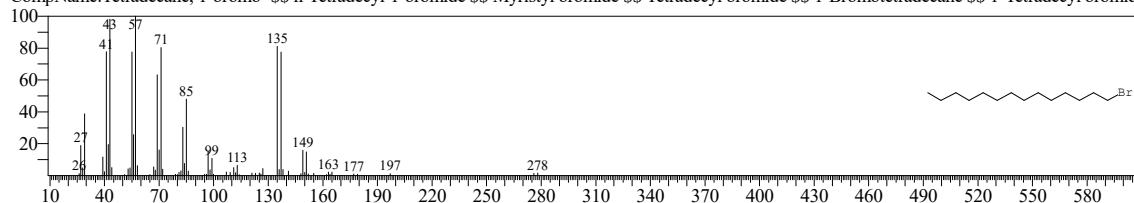

Hit#:2 Entry:38350 Library:NIST20R.lib

SI:73 Formula:C18H37Br CAS:112-89-0 MolWeight:332 RetIndex:2107

CompName:Octadecane, 1-bromo- \$\$ n-Octadecyl bromide \$\$ Octadecyl bromide \$\$ Stearyl bromide \$\$ 1-Bromooctadecane

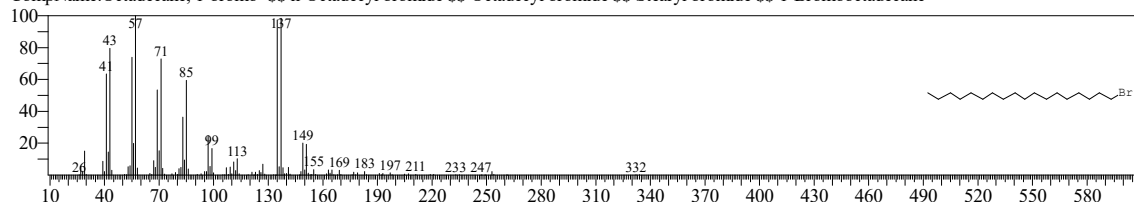

Hit#:3 Entry:151444 Library:NIST20M1.lib

SI:72 Formula:C15H31Br CAS:629-72-1 MolWeight:290 RetIndex:1808

CompName:Pentadecane, 1-bromo- \$\$ Pentadecyl bromide \$\$ 1-Bromopentadecane \$\$ n-Pentadecyl bromide

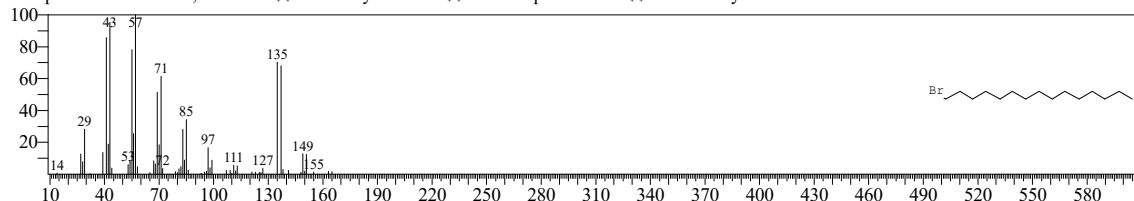

Hit#:4 Entry:30576 Library:NIST20R.lib

SI:71 Formula:C12H25Br CAS:143-15-7 MolWeight:248 RetIndex:1510

CompName:Dodecane, 1-bromo- \$\$ n-Dodecyl bromide \$\$ Dodecyl bromide \$\$ Lauryl bromide \$\$ 1-Bromododecane

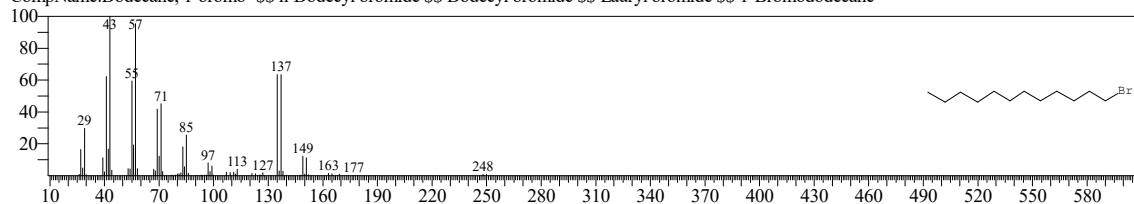

Hit#:5 Entry:36208 Library:NIST20R.lib

SI:71 Formula:C16H33Br CAS:112-82-3 MolWeight:304 RetIndex:1908

CompName:Hexadecane, 1-bromo- \$\$ n-Hexadecyl bromide \$\$ n-Hexadecyl-1-bromide \$\$ Cetyl bromide \$\$ Hexadecyl bromide \$\$ 1-Bromohexadecane S

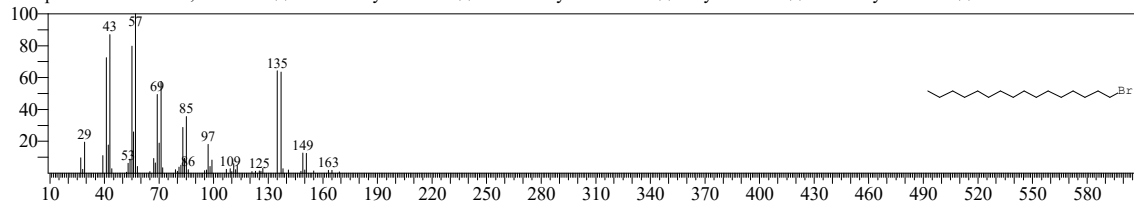

# TNAU

<< Target >>

Line#9 R.Time:27.275(Scan#:4556) MassPeaks:313

RawMode:Averaged 27.270-27.280(4555-4557) BasePeak:207.05(1433)

BG Mode:Calc. from Peak Group 1 - Event 1 Q3 Scan

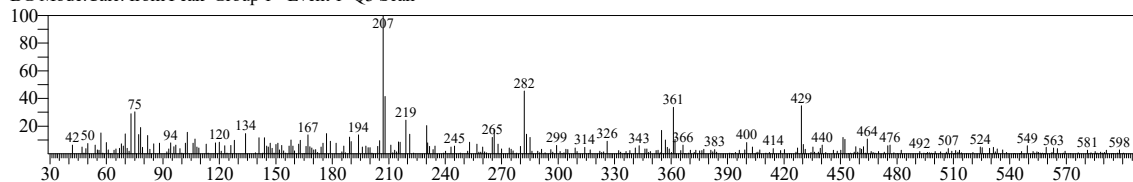

Hit#1 Entry:290 Library:OA\_TMS\_DB5\_67min\_V3.lib

SI:32 Formula:C13H23NO3Si2 CAS:548-93-6 MolWeight:297 RetIndex:1773

CompName:3-Hydroxyanthranilic acid-2TMS ; 2-amino-3-hydroxybenzoic acid

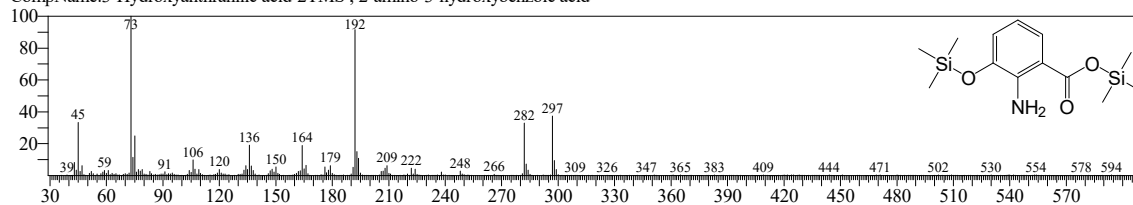

Hit#2 Entry:402 Library:OA\_TMS\_DB5\_67min\_V3.lib

SI:30 Formula:C20H42O4Si4 CAS:775-01-9 MolWeight:458 RetIndex:1942

CompName:3,4-Dihydroxymandelic acid-4TMS ; 2-(3,4-dihydroxyphenyl)-2-hydroxyacetic acid

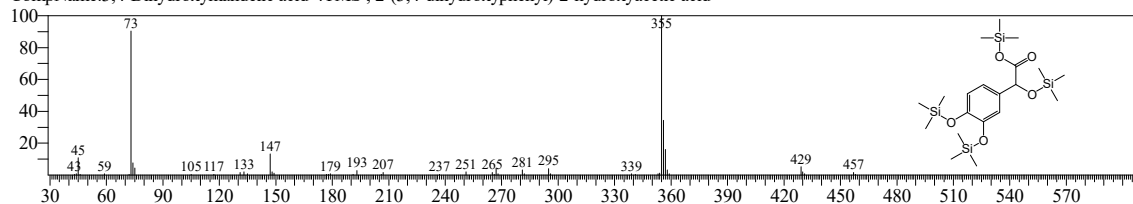

Hit#3 Entry:343 Library:OA\_TMS\_DB5\_67min\_V3.lib

SI:30 Formula:C18H37NO3Si3 CAS:51-43-4 MolWeight:399 RetIndex:1868

CompName:Epinephrine-3TMS ; 4-[(1R)-1-hydroxy-2-(methylamino)ethyl]benzene-1,2-diol

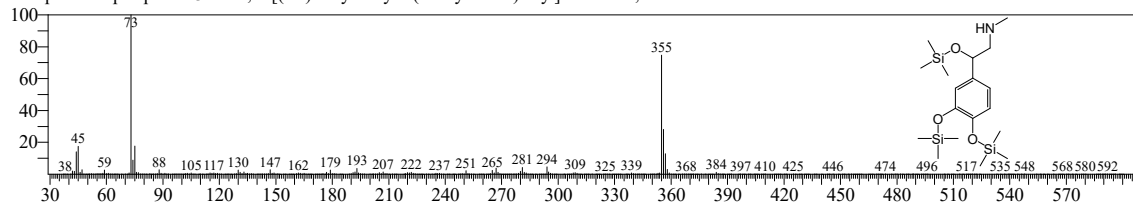

Hit#4 Entry:3 Library:OA\_TMS\_DB5\_67min\_V3.lib

SI:30 Formula:C9H27BO3Si3 CAS:10043-35-3 MolWeight:278 RetIndex:992

CompName:Boric acid-3TMS ; boric acid

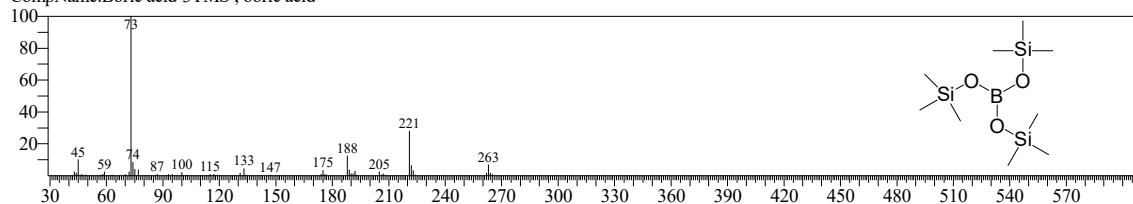

Hit#5 Entry:528 Library:OA\_TMS\_DB5\_67min\_V3.lib

SI:29 Formula:C17H28Cl2N2O5Si2 CAS:56-75-7 MolWeight:466 RetIndex:2508

CompName:Chloramphenicol-2TMS ; 2,2-dichloro-N-[(1R,2R)-1,3-dihydroxy-1-(4-nitrophenyl)propan-2-yl]acetamide

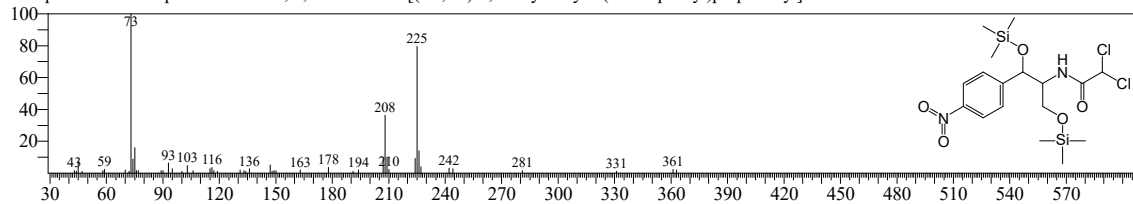

# TNAU

<< Target >>

Line#:10 R.Time:27.395(Scan#:4580) MassPeaks:319

RawMode:Averaged 27.390-27.400(4579-4581) BasePeak:207.05(873)

BG Mode:Calc. from Peak Group 1 - Event 1 Q3 Scan

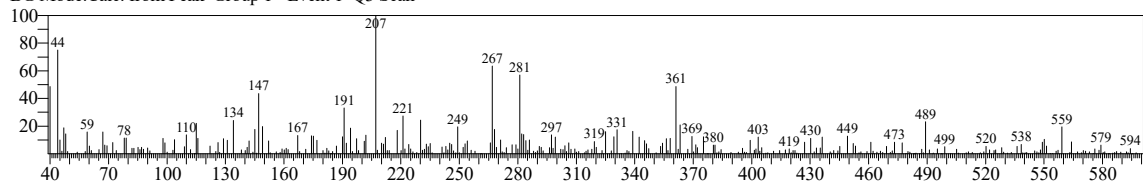

Hit#:1 Entry:211 Library:OA\_TMS\_DB5\_67min\_V3.lib

SI:28 Formula:C<sub>13</sub>H<sub>22</sub>O<sub>3</sub>Si<sub>2</sub> CAS:99-96-7 MolWeight:282 RetIndex:1636

CompName:4-Hydroxybenzoic acid-2TMS ; 4-hydroxybenzoic acid

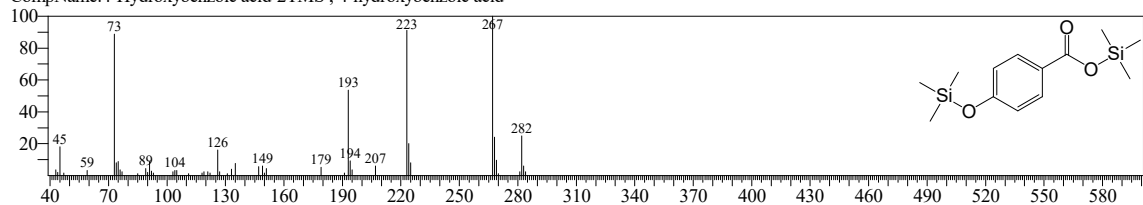

Hit#:2 Entry:179 Library:OA\_TMS\_DB5\_67min\_V3.lib

SI:27 Formula:C<sub>13</sub>H<sub>22</sub>O<sub>3</sub>Si<sub>2</sub> CAS:99-06-9 MolWeight:282 RetIndex:1572

CompName:3-Hydroxybenzoic acid-2TMS ; 3-hydroxybenzoic acid

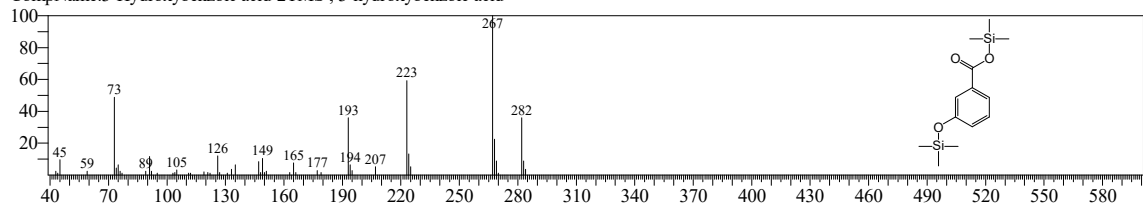

Hit#:3 Entry:463 Library:OA\_TMS\_DB5\_67min\_V3.lib

SI:26 Formula:C<sub>21</sub>H<sub>43</sub>NO<sub>4</sub>Si<sub>4</sub> CAS:59-92-7 MolWeight:485 RetIndex:2123

CompName:Dopa-4TMS ; (2S)-2-amino-3-(3,4-dihydroxyphenyl)propanoic acid

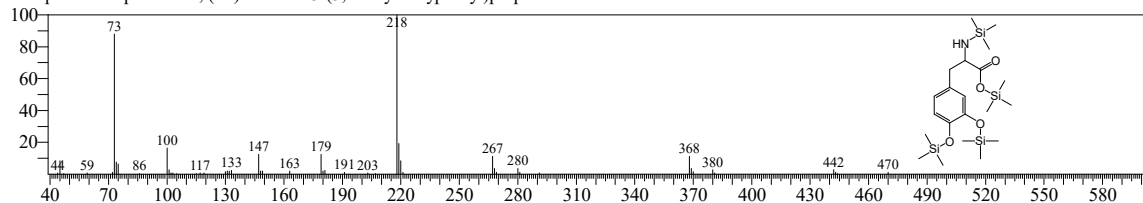

Hit#:4 Entry:291 Library:OA\_TMS\_DB5\_67min\_V3.lib

SI:24 Formula:C<sub>14</sub>H<sub>24</sub>O<sub>4</sub>Si<sub>2</sub> CAS:121-34-6 MolWeight:312 RetIndex:1775

CompName:3-Methoxy-4-hydroxybenzoic acid-2TMS ; 4-hydroxy-3-methoxybenzoic acid

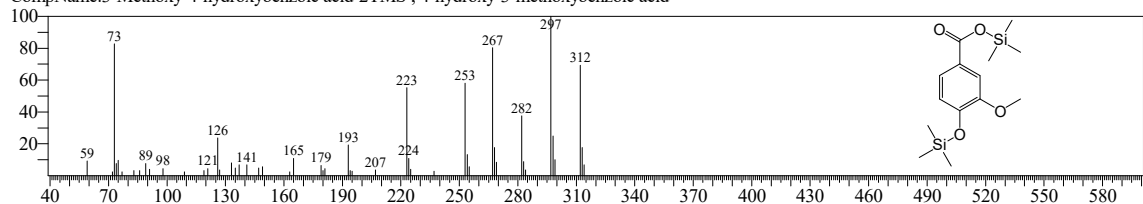

Hit#:5 Entry:359 Library:OA\_TMS\_DB5\_67min\_V3.lib

SI:24 Formula:C<sub>18</sub>H<sub>34</sub>O<sub>5</sub>Si<sub>3</sub> CAS:55-10-7 MolWeight:414 RetIndex:1894

CompName:Vanilmandelic acid-3TMS ; 2-hydroxy-2-(4-hydroxy-3-methoxyphenyl)acetic acid

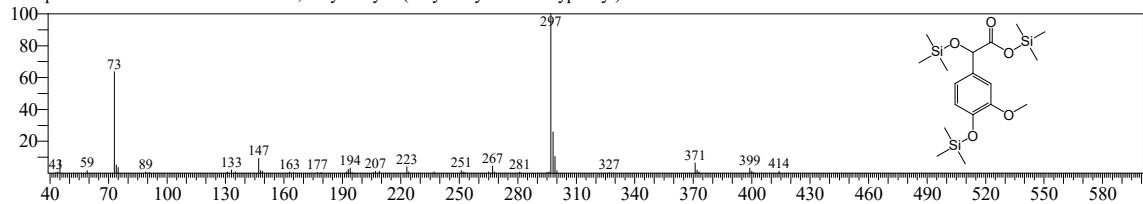

# TNAU

<< Target >>

Line#:11 R.Time:28.205(Scan#:4742) MassPeaks:301

RawMode:Averaged 28.200-28.210(4741-4743) BasePeak:207.05(1736)

BG Mode:Calc. from Peak Group 1 - Event 1 Q3 Scan

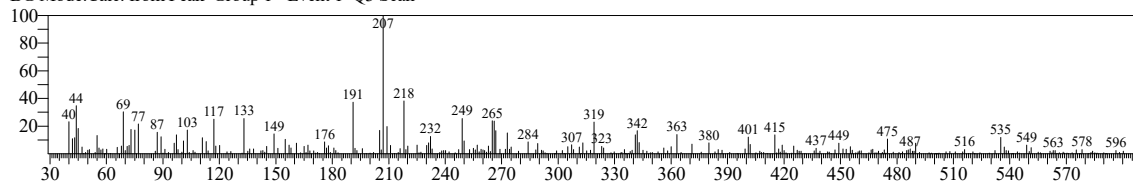

Hit#:1 Entry:77 Library:OA\_TMS\_DB5\_67min\_V3.lib

SI:37 Formula:C<sub>12</sub>H<sub>32</sub>O<sub>3</sub>Si<sub>3</sub> CAS:56-81-5 MolWeight:308 RetIndex:1279

CompName:Glycerol-3TMS ; propane-1,2,3-triol

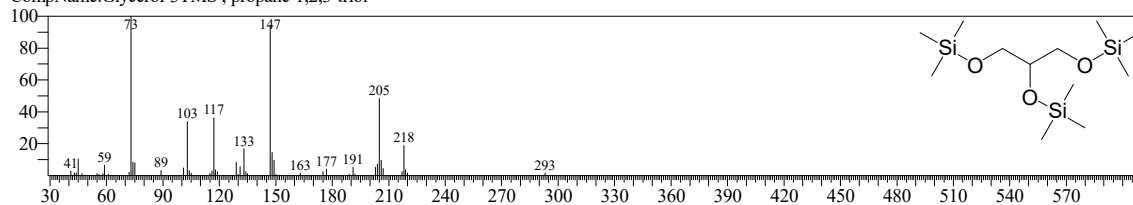

Hit#:2 Entry:539 Library:OA\_TMS\_DB5\_67min\_V3.lib

SI:37 Formula:C<sub>27</sub>H<sub>60</sub>O<sub>3</sub>Si<sub>2</sub> CAS:544-62-7 MolWeight:488 RetIndex:2684

CompName:Batyl alcohol-2TMS ; 3-octadecoxypropane-1,2-diol

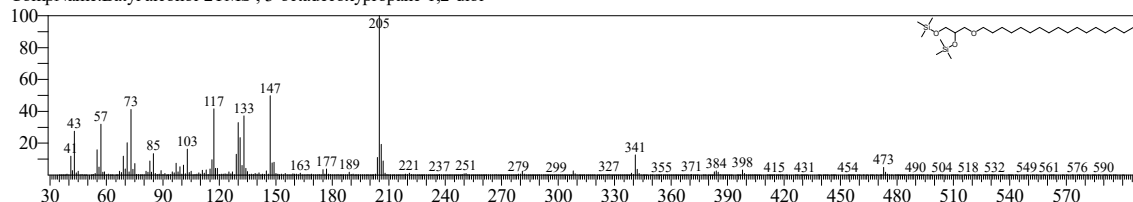

Hit#:3 Entry:511 Library:OA\_TMS\_DB5\_67min\_V3.lib

SI:34 Formula:C<sub>22</sub>H<sub>48</sub>O<sub>3</sub>Si<sub>2</sub> CAS:506-13-8 MolWeight:416 RetIndex:2396

CompName:Juniperic acid-2TMS ; 16-hydroxyhexadecanoic acid

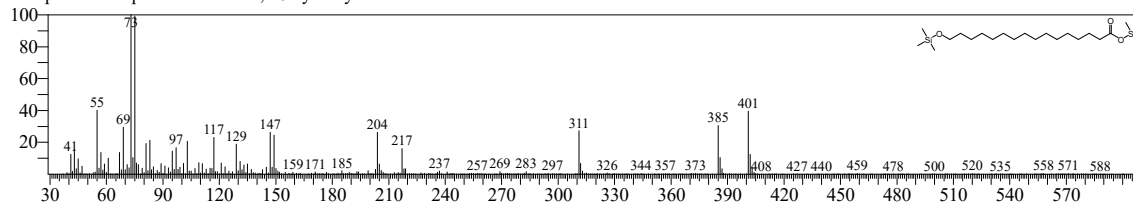

Hit#:4 Entry:491 Library:OA\_TMS\_DB5\_67min\_V3.lib

SI:34 Formula:C<sub>21</sub>H<sub>44</sub>O<sub>2</sub>Si CAS:57-11-4 MolWeight:356 RetIndex:2244

CompName:Stearic acid-TMS ; octadecanoic acid

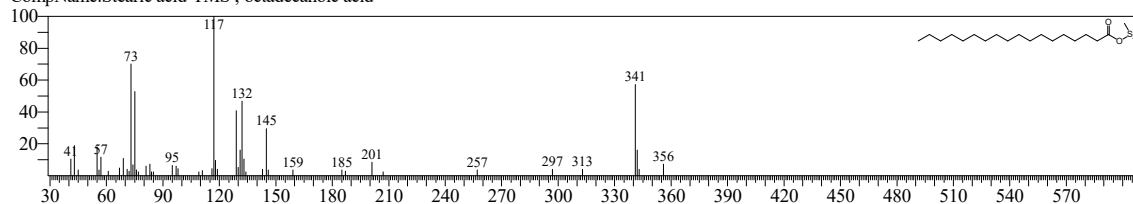

Hit#:5 Entry:461 Library:OA\_TMS\_DB5\_67min\_V3.lib

SI:34 Formula:C<sub>20</sub>H<sub>37</sub>NO<sub>4</sub>Si<sub>3</sub> CAS:537-55-3 MolWeight:439 RetIndex:2119

CompName:N-Acetyltyrosine-3TMS ; (2S)-2-acetamido-3-(4-hydroxyphenyl)propanoic acid

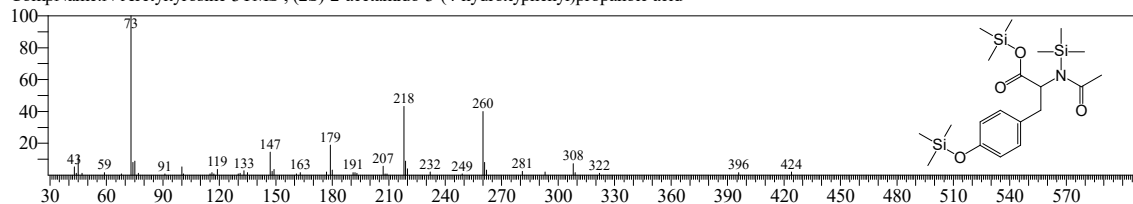

# TNAU

<< Target >>

Line#:12 R.Time:29.255(Scan#:4952) MassPeaks:322

RawMode:Averaged 29.250-29.260(4951-4953) BasePeak:207.05(2380)

BG Mode:Calc. from Peak Group 1 - Event 1 Q3 Scan

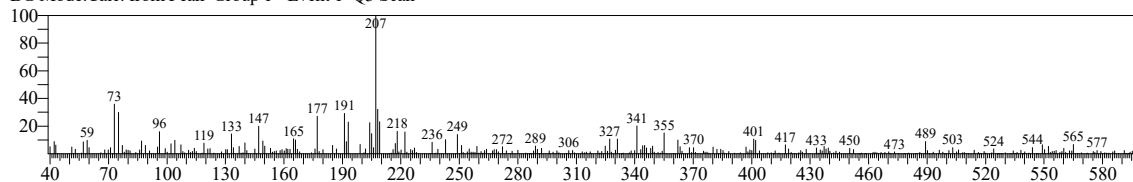

Hit#:1 Entry:232 Library:OA\_TMS\_DB5\_67min\_V3.lib

SI:46 Formula:C17H42O5Si4 CAS:10323-20-3 MolWeight:438 RetIndex:1667

CompName:Arabinose-4TMS(2) ; (2S,3R,4R)-2,3,4,5-tetrahydropentanal

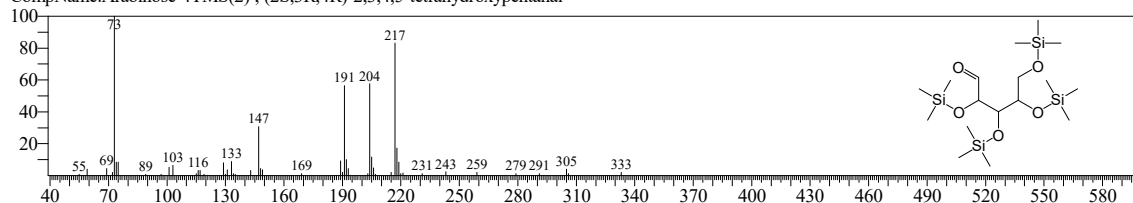

Hit#:2 Entry:349 Library:OA\_TMS\_DB5\_67min\_V3.lib

SI:46 Formula:C21H52O6Si5 CAS:2595-97-3 MolWeight:540 RetIndex:1874

CompName:Allose-5TMS ; (2R,3R,4R,5R)-2,3,4,5,6-pentahydroxyhexanal

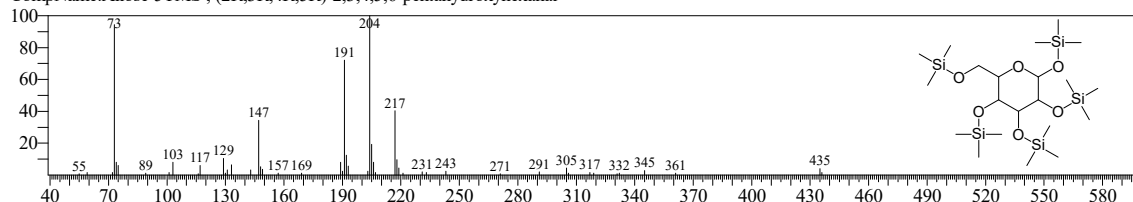

Hit#:3 Entry:437 Library:OA\_TMS\_DB5\_67min\_V3.lib

SI:46 Formula:C21H52O6Si5 CAS:50-99-7 MolWeight:540 RetIndex:2002

CompName:Glucose-5TMS(2) ; (3R,4S,5S,6R)-6-(hydroxymethyl)oxane-2,3,4,5-tetrol

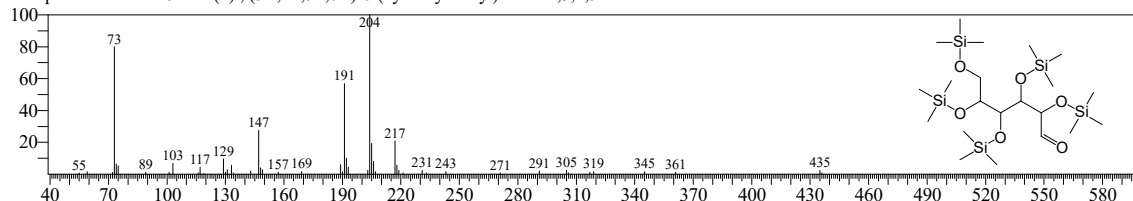

Hit#:4 Entry:345 Library:OA\_TMS\_DB5\_67min\_V3.lib

SI:46 Formula:C21H52O6Si5 CAS:59-23-4 MolWeight:540 RetIndex:1868

CompName:Galactose-5TMS(2) ; (3R,4S,5R,6R)-6-(hydroxymethyl)oxane-2,3,4,5-tetrol

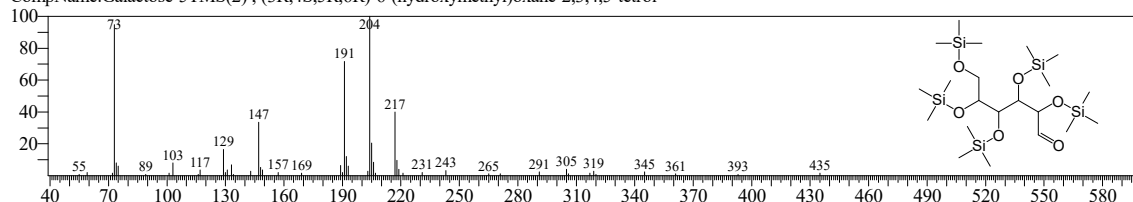

Hit#:5 Entry:288 Library:OA\_TMS\_DB5\_67min\_V3.lib

SI:45 Formula:C21H52O6Si5 CAS:3458-28-4 MolWeight:540 RetIndex:1771

CompName:Mannose-5TMS(1) ; (3S,4S,5S,6R)-6-(hydroxymethyl)oxane-2,3,4,5-tetrol

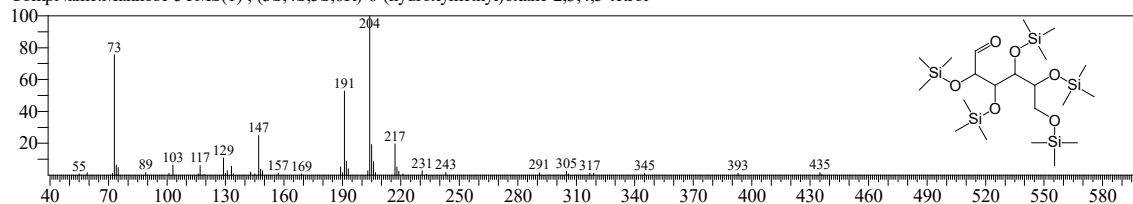

# TNAU

<< Target >>

Line#:13 R.Time:29.555(Scan#:5012) MassPeaks:281

RawMode:Averaged 29.550-29.560(5011-5013) BasePeak:265.00(1399)

BG Mode:Calc. from Peak Group 1 - Event 1 Q3 Scan

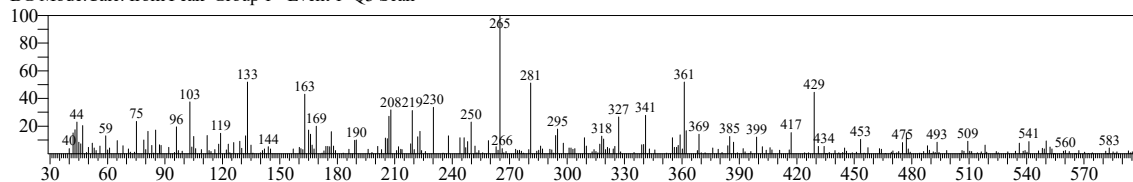

Hit#:1 Entry:310 Library:OA\_TMS\_DB5\_67min\_V3.lib

SI:28 Formula:C11H20N4OSi2 CAS:68-94-0 MolWeight:280 RetIndex:1822

CompName:Hypoxanthine-2TMS ; 3,7-dihydropurin-6-one

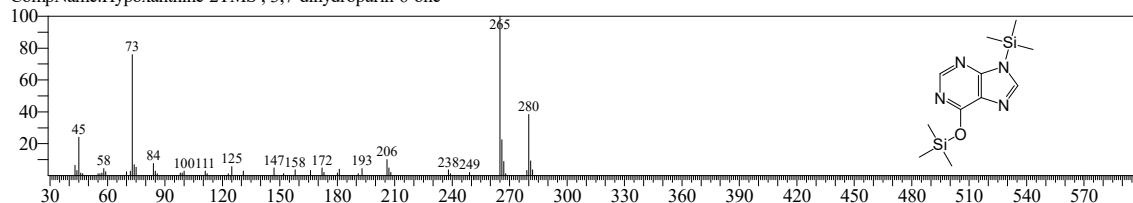

Hit#:2 Entry:539 Library:OA\_TMS\_DB5\_67min\_V3.lib

SI:25 Formula:C27H60O3Si2 CAS:544-62-7 MolWeight:488 RetIndex:2684

CompName:Batyl alcohol-2TMS ; 3-octadecoxypropane-1,2-diol

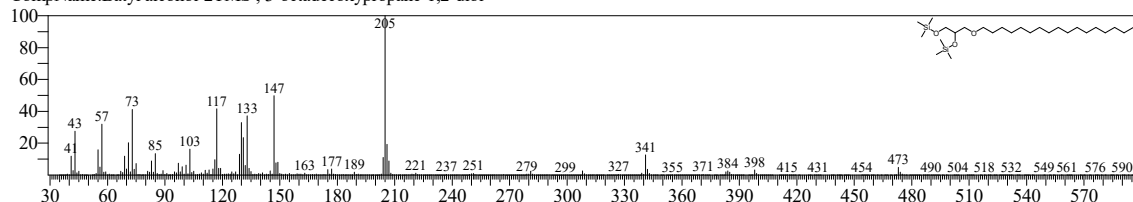

Hit#:3 Entry:402 Library:OA\_TMS\_DB5\_67min\_V3.lib

SI:23 Formula:C20H42O4Si4 CAS:775-01-9 MolWeight:458 RetIndex:1942

CompName:3,4-Dihydroxymandelic acid-4TMS ; 2-(3,4-dihydroxyphenyl)-2-hydroxyacetic acid

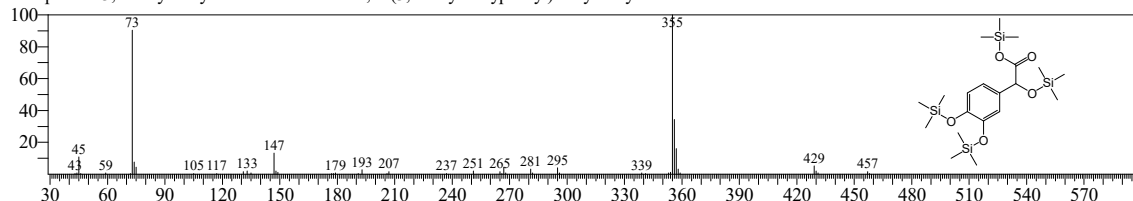

Hit#:4 Entry:541 Library:OA\_TMS\_DB5\_67min\_V3.lib

SI:23 Formula:C36H86O11Si8 CAS:57-50-1 MolWeight:918 RetIndex:2705

CompName:Sucrose-8TMS ; (2R,3R,4S,5S,6R)-2-[(2S,3S,4S,5R)-3,4-dihydroxy-2,5-bis(hydroxymethyl)oxolan-2-yl]oxy-6-(hydroxymethyl)oxane-3

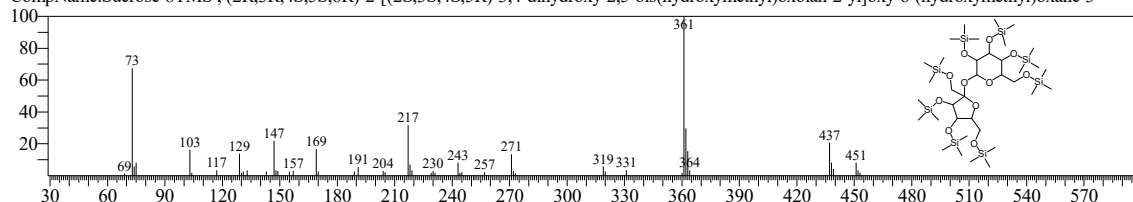

Hit#:5 Entry:552 Library:OA\_TMS\_DB5\_67min\_V3.lib

SI:22 Formula:C36H86O11Si8 CAS:99-20-7 MolWeight:918 RetIndex:2812

CompName:Trehalose-8TMS ; (2R,3S,4S,5R,6R)-2-(hydroxymethyl)-6-[(2R,3R,4S,5S,6R)-3,4,5-trihydroxy-6-(hydroxymethyl)oxan-2-yl]oxyoxane-

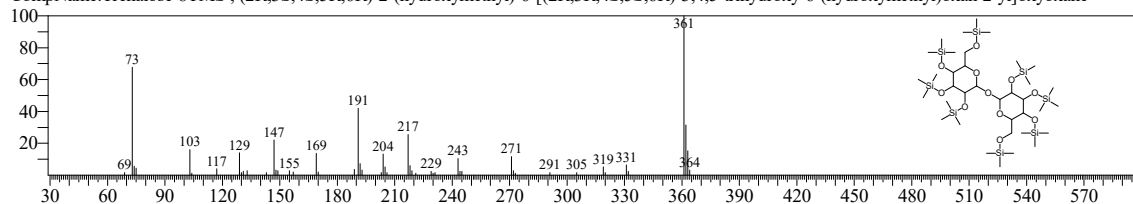

# TNAU

<< Target >>

Line#:14 R.Time:29.980(Scan#:5097) MassPeaks:288

RawMode:Averaged 29.975-29.985(5096-5098) BasePeak:207.05(2416)

BG Mode:Calc. from Peak Group 1 - Event 1 Q3 Scan

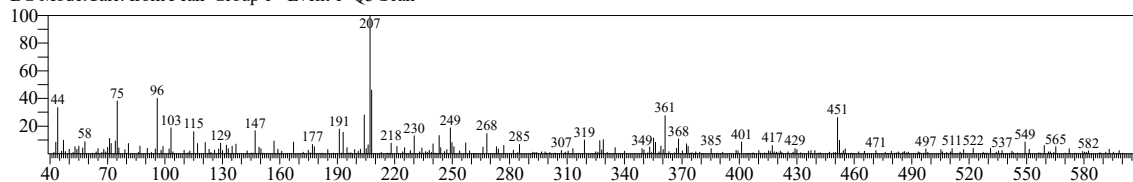

Hit#:1 Entry:555 Library:OA\_TMS\_DB5\_67min\_V3.lib

SI:37 Formula:C39H96O11Si9 CAS:585-86-4 MolWeight:992 RetIndex:2845

CompName:Lactitol-9TMS ; (2S,3R,4R,5R)-4-[(2S,3R,4S,5R,6R)-3,4,5-trihydroxy-6-(hydroxymethyl)oxan-2-yl]oxyhexane-1,2,3,5,6-pentol

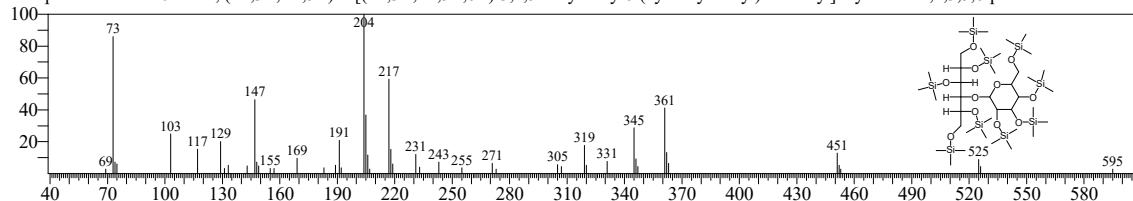

Hit#:2 Entry:559 Library:OA\_TMS\_DB5\_67min\_V3.lib

SI:36 Formula:C39H96O11Si9 CAS:585-88-6 MolWeight:992 RetIndex:2923

CompName:Maltitol-9TMS ; (2S,3R,4R,5R)-4-[(2R,3R,4S,5S,6R)-3,4,5-trihydroxy-6-(hydroxymethyl)oxan-2-yl]oxyhexane-1,2,3,5,6-pentol

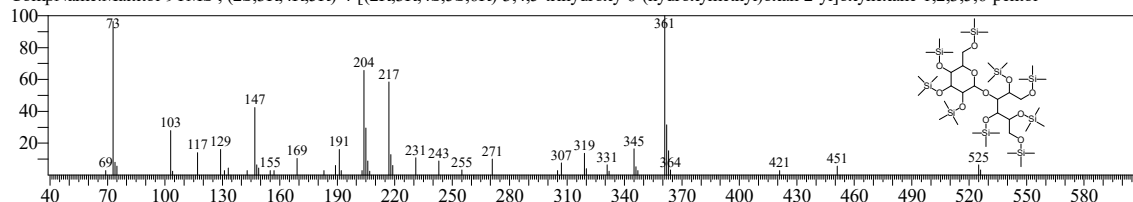

Hit#:3 Entry:311 Library:OA\_TMS\_DB5\_67min\_V3.lib

SI:35 Formula:C21H52O6Si5 CAS:59-23-4 MolWeight:540 RetIndex:1824

CompName:Galactose-5TMS(1) ; (3R,4S,5R,6R)-6-(hydroxymethyl)oxane-2,3,4,5-tetrol

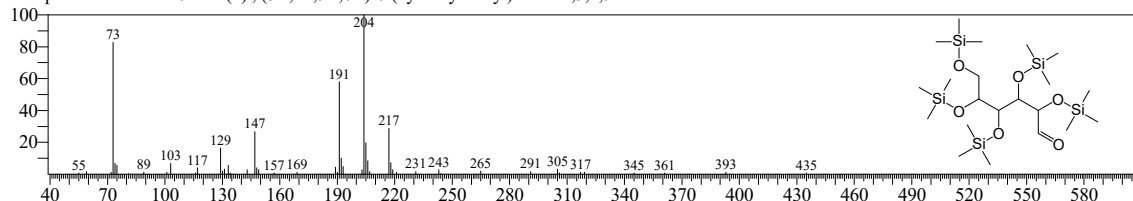

Hit#:4 Entry:386 Library:OA\_TMS\_DB5\_67min\_V3.lib

SI:35 Formula:C21H52O6Si5 CAS:50-99-7 MolWeight:540 RetIndex:1922

CompName:Glucose-5TMS(1) ; (3R,4S,5S,6R)-6-(hydroxymethyl)oxane-2,3,4,5-tetrol

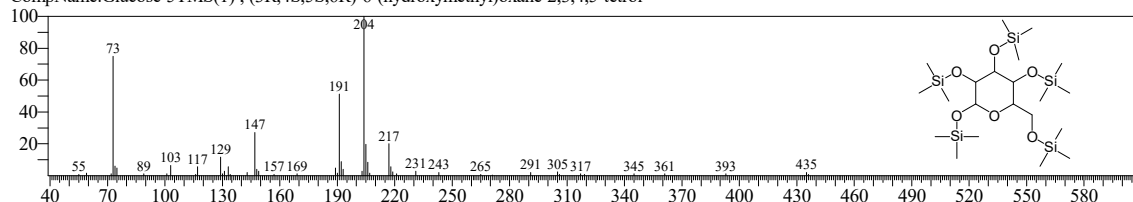

Hit#:5 Entry:349 Library:OA\_TMS\_DB5\_67min\_V3.lib

SI:34 Formula:C21H52O6Si5 CAS:2595-97-3 MolWeight:540 RetIndex:1874

CompName:Allose-5TMS ; (2R,3R,4R,5R)-2,3,4,5,6-pentahydroxyhexanal

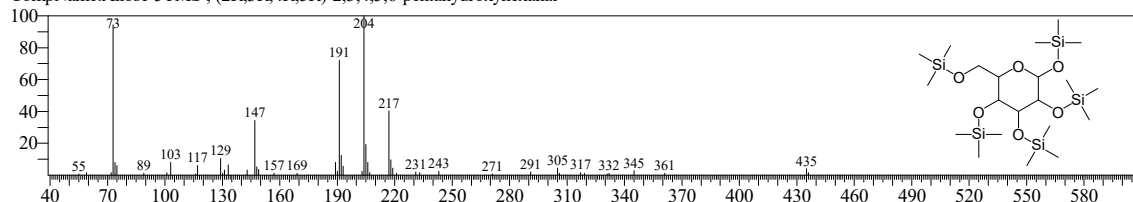



# TNAU

<< Target >>

Line#:15 R.Time:30.050(Scan#:5111) MassPeaks:276

RawMode:Averaged 30.045-30.055(5110-5112) BasePeak:217.10(1609)

BG Mode:Calc. from Peak Group 1 - Event 1 Q3 Scan

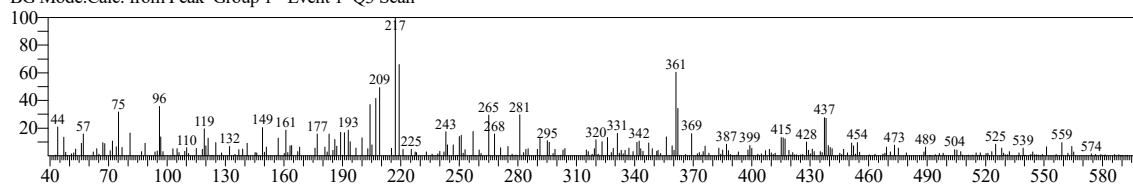

Hit#:1 Entry:559 Library:OA TMS DB5 67min V3.lib

SI:36 Formula:C39H96O11Si9 CAS:585-88-6 MolWeight:992 RetIndex:2923

CompName:Maltitol-9TMS ; (2S,3R,4R,5R)-4-[(2R,3R,4S,5S,6R)-3,4,5-trihydroxy-6-(hydroxymethyl)oxan-2-yl]oxyhexane-1,2,3,5,6-pentol

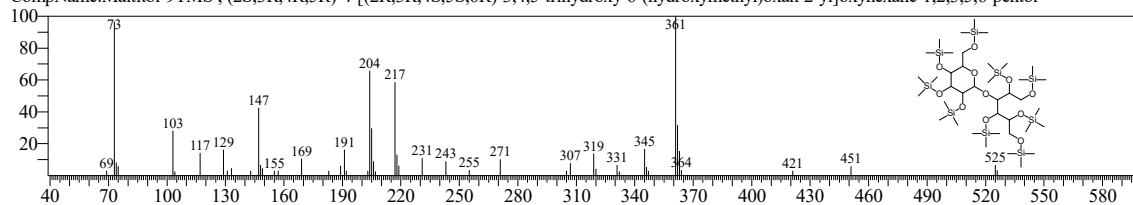

Hit#:2 Entry:541 Library:OA TMS DB5 67min V3.lib

SI:36 Formula:C36H86O11Si8 CAS:57-50-1 MolWeight:918 RetIndex:2705

CompName:Sucrose-8TMS ; (2R,3R,4S,5S,6R)-2-[(2S,3S,4S,5R)-3,4-dihydroxy-2,5-bis(hydroxymethyl)oxolan-2-yl]oxy-6-(hydroxymethyl)oxane-3

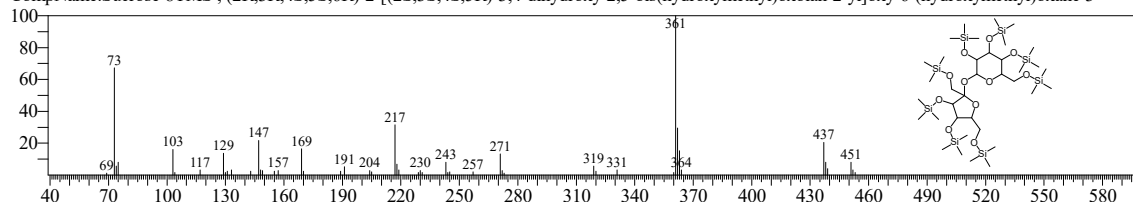

Hit#:3 Entry:560 Library:OA TMS DB5 67min V3.lib

SI:34 Formula:C37H89NO11Si8 CAS:499-40-1 MolWeight:947 RetIndex:2947

CompName:Isomaltose-meto-8TMS (1) ; (3R,4S,5S,6R)-6-[[[(2S,3R,4S,5S,6R)-3,4,5-trihydroxy-6-(hydroxymethyl)oxan-2-yl]oxymethyl]oxane-2,3,

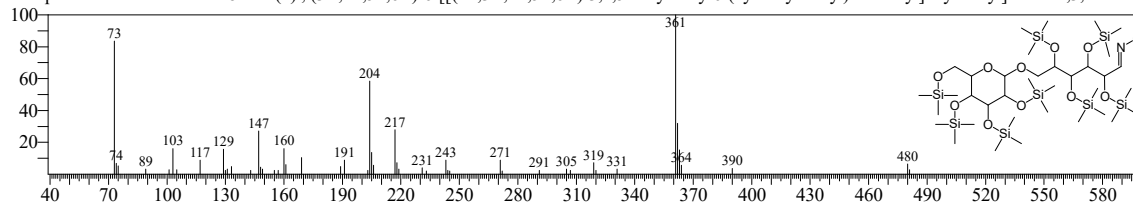

Hit#:4 Entry:552 Library:OA TMS DB5 67min V3.lib

SI:34 Formula:C36H86O11Si8 CAS:99-20-7 MolWeight:918 RetIndex:2812

CompName:Trehalose-8TMS ; (2R,3S,4S,5R,6R)-2-(hydroxymethyl)-6-[(2R,3R,4S,5S,6R)-3,4,5-trihydroxy-6-(hydroxymethyl)oxan-2-yl]oxyoxane-

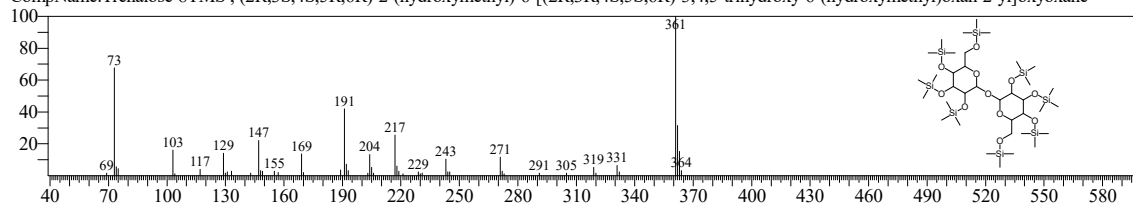

Hit#:5 Entry:555 Library:OA TMS DB5 67min V3.lib

SI:33 Formula:C39H96O11Si9 CAS:585-86-4 MolWeight:992 RetIndex:2845

CompName:Lactitol-9TMS ; (2S,3R,4R,5R)-4-[(2S,3R,4S,5R,6R)-3,4,5-trihydroxy-6-(hydroxymethyl)oxan-2-yl]oxyhexane-1,2,3,5,6-pentol

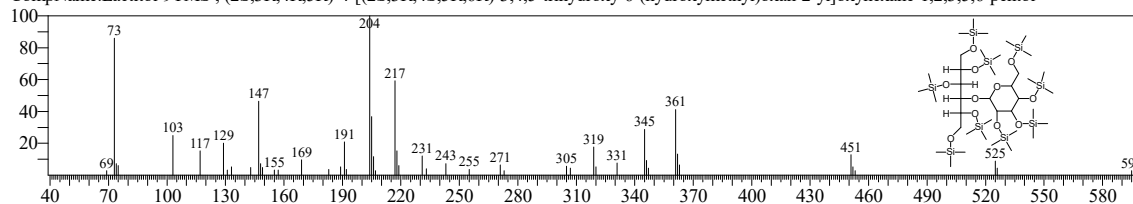

# TNAU

<< Target >>

Line#:16 R.Time:30.115(Scan#:5124) MassPeaks:270

RawMode:Averaged 30.110-30.120(5123-5125) BasePeak:73.05(1191)

BG Mode:Calc. from Peak Group 1 - Event 1 Q3 Scan

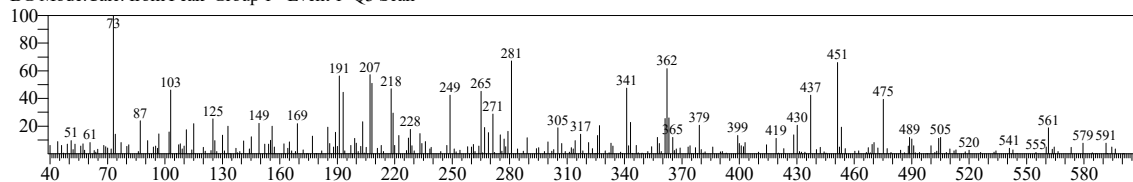

Hit#:1 Entry:541 Library:OA\_TMS\_DB5\_67min\_V3.lib

SI:37 Formula:C36H86O11Si8 CAS:57-50-1 MolWeight:918 RetIndex:2705

CompName:Sucrose-8TMS ; (2R,3R,4S,5S,6R)-2-[(2S,3S,4S,5R)-3,4-dihydroxy-2,5-bis(hydroxymethyl)oxolan-2-yl]oxy-6-(hydroxymethyl)oxane-3

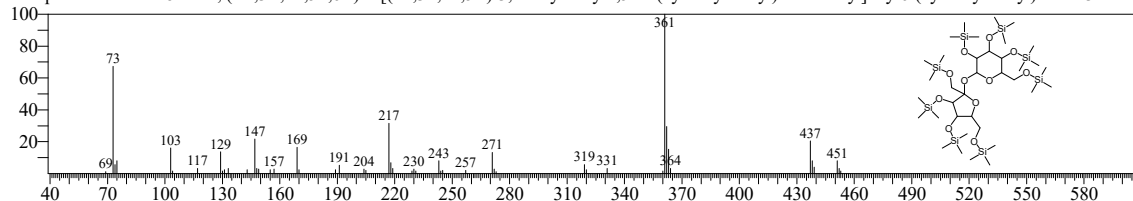

Hit#:2 Entry:561 Library:OA\_TMS\_DB5\_67min\_V3.lib

SI:37 Formula:C37H89NO11Si8 CAS:499-40-1 MolWeight:947 RetIndex:2983

CompName:Isomaltose-meto-8TMS(2) ; (3R,4S,5S,6R)-6-[[[(2S,3R,4S,5S,6R)-3,4,5-trihydroxy-6-(hydroxymethyl)oxan-2-yl]oxymethyl]oxane-2,3,

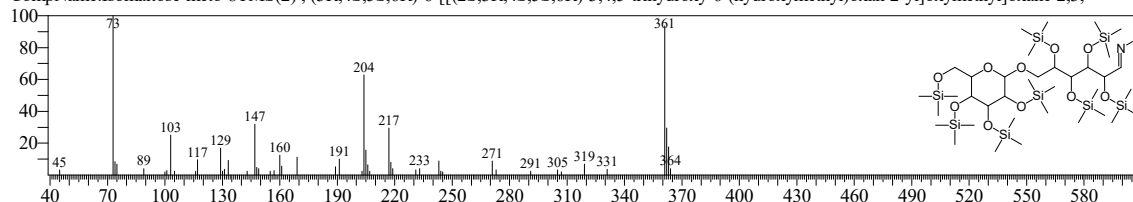

Hit#:3 Entry:552 Library:OA\_TMS\_DB5\_67min\_V3.lib

SI:37 Formula:C36H86O11Si8 CAS:99-20-7 MolWeight:918 RetIndex:2812

CompName:Trehalose-8TMS ; (2R,3S,4S,5R,6R)-2-(hydroxymethyl)-6-[(2R,3R,4S,5S,6R)-3,4,5-trihydroxy-6-(hydroxymethyl)oxan-2-yl]oxyoxane-

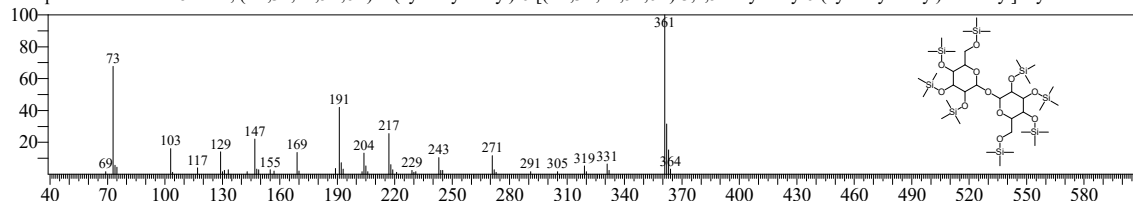

Hit#:4 Entry:559 Library:OA\_TMS\_DB5\_67min\_V3.lib

SI:37 Formula:C39H96O11Si9 CAS:585-88-6 MolWeight:992 RetIndex:2923

CompName:Maltitol-9TMS ; (2S,3R,4R,5R)-4-[(2R,3R,4S,5S,6R)-3,4,5-trihydroxy-6-(hydroxymethyl)oxan-2-yl]oxyhexane-1,2,3,5,6-pentol

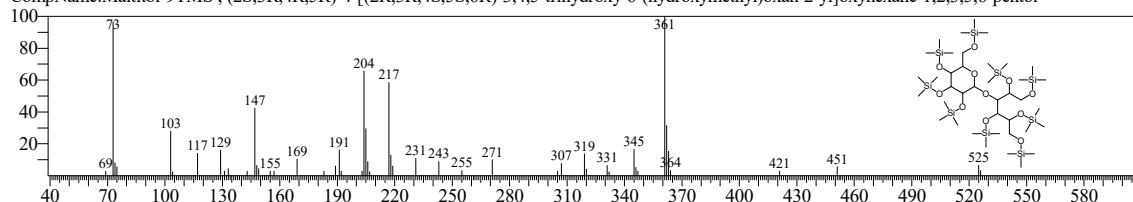

Hit#:5 Entry:556 Library:OA\_TMS\_DB5\_67min\_V3.lib

SI:36 Formula:C37H89NO11Si8 CAS:69-79-4 MolWeight:947 RetIndex:2846

CompName:Maltose-meto-8TMS(2) ; (2R,3S,4S,5R,6R)-2-(hydroxymethyl)-6-[(2R,3S,4R,5R,6R)-4,5,6-trihydroxy-2-(hydroxymethyl)oxan-3-yl]oxy

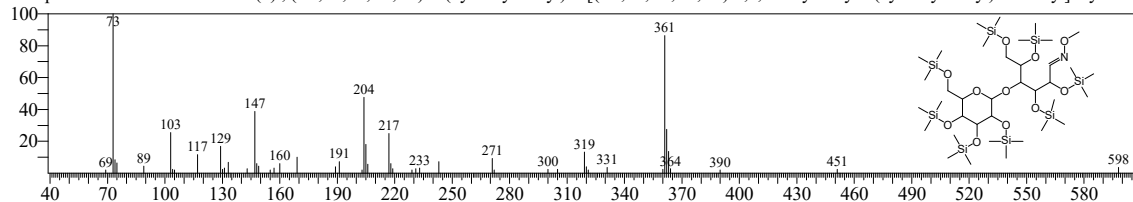

# TNAU

<< Target >>

Line#:17 R.Time:30.170(Scan#:5135) MassPeaks:298

RawMode:Averaged 30.165-30.175(5134-5136) BasePeak:217.10(1169)

BG Mode:Calc. from Peak Group 1 - Event 1 Q3 Scan

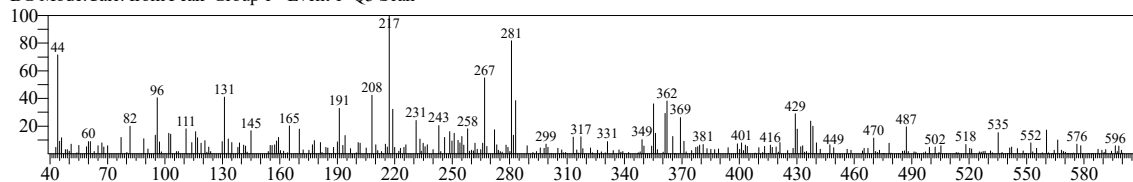

Hit#:1 Entry:541 Library:OA\_TMS\_DB5\_67min\_V3.lib

SI:29 Formula:C36H86O11Si8 CAS:57-50-1 MolWeight:918 RetIndex:2705

CompName:Sucrose-8TMS ; (2R,3R,4S,5S,6R)-2-[(2S,3S,4S,5R)-3,4-dihydroxy-2,5-bis(hydroxymethyl)oxolan-2-yl]oxy-6-(hydroxymethyl)oxane-3

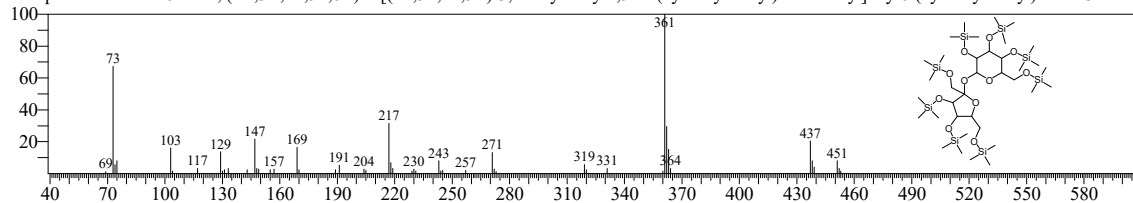

Hit#:2 Entry:552 Library:OA\_TMS\_DB5\_67min\_V3.lib

SI:27 Formula:C36H86O11Si8 CAS:99-20-7 MolWeight:918 RetIndex:2812

CompName:Trehalose-8TMS ; (2R,3S,4S,5R,6R)-2-(hydroxymethyl)-6-[(2R,3R,4S,5S,6R)-3,4,5-trihydroxy-6-(hydroxymethyl)oxan-2-yl]oxyoxane-

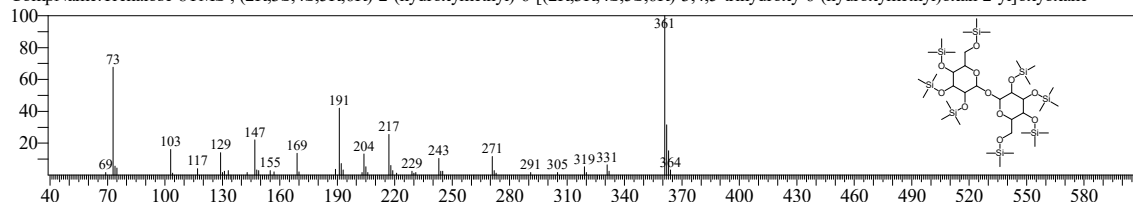

Hit#:3 Entry:326 Library:OA\_TMS\_DB5\_67min\_V3.lib

SI:27 Formula:C21H52O6Si5 CAS:23140-52-5 MolWeight:540 RetIndex:1841

CompName:Psicose-5TMS(2) ; (3R,4R,5R)-1,3,4,5,6-pentahydroxyhexan-2-one

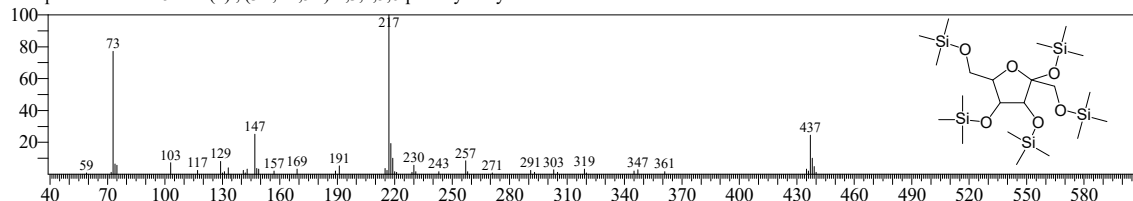

Hit#:4 Entry:559 Library:OA\_TMS\_DB5\_67min\_V3.lib

SI:26 Formula:C39H96O11Si9 CAS:585-88-6 MolWeight:992 RetIndex:2923

CompName:Maltitol-9TMS ; (2S,3R,4R,5R)-4-[(2R,3R,4S,5S,6R)-3,4,5-trihydroxy-6-(hydroxymethyl)oxan-2-yl]oxyhexane-1,2,3,5,6-pentol



Hit#:5 Entry:560 Library:OA\_TMS\_DB5\_67min\_V3.lib

SI:24 Formula:C37H89NO11Si8 CAS:499-40-1 MolWeight:947 RetIndex:2947

CompName:Isomaltose-meto-8TMS(1) ; (3R,4S,5S,6R)-6-[[[(2S,3R,4S,5S,6R)-3,4,5-trihydroxy-6-(hydroxymethyl)oxan-2-yl]oxymethyl]oxane-2,3,

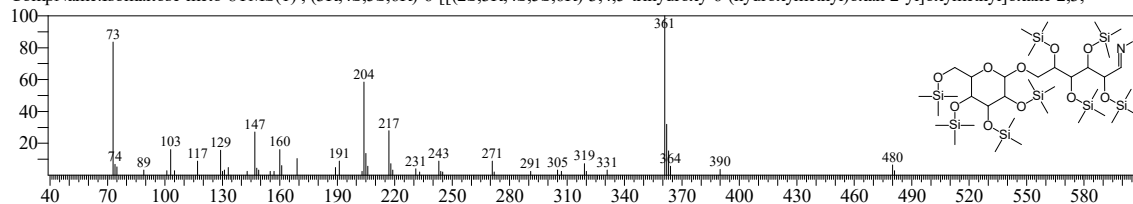

# TNAU

<< Target >>

Line#:18 R.Time:30.205(Scan#:5142) MassPeaks:303

RawMode:Averaged 30.200-30.210(5141-5143) BasePeak:217.10(931)

BG Mode:Calc. from Peak Group 1 - Event 1 Q3 Scan

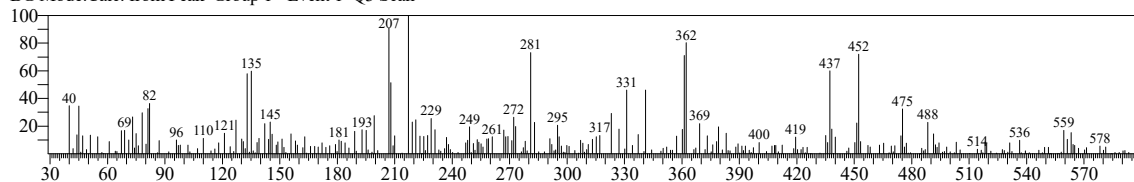

Hit#:1 Entry:541 Library:OA\_TMS\_DB5\_67min\_V3.lib

SI:34 Formula:C36H86O11Si8 CAS:57-50-1 MolWeight:918 RetIndex:2705

CompName:Sucrose-8TMS ; (2R,3R,4S,5S,6R)-2-[(2S,3S,4S,5R)-3,4-dihydroxy-2,5-bis(hydroxymethyl)oxolan-2-yl]oxy-6-(hydroxymethyl)oxane-3

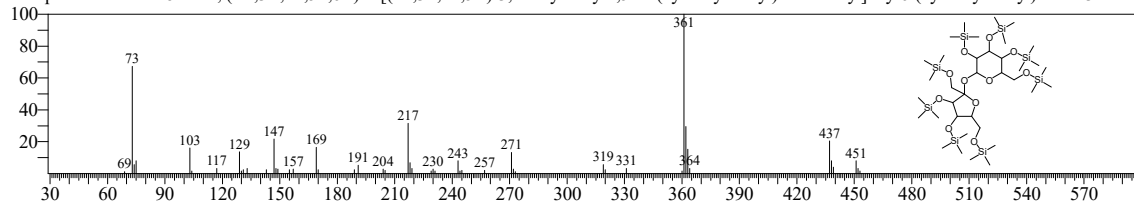

Hit#:2 Entry:559 Library:OA\_TMS\_DB5\_67min\_V3.lib

SI:29 Formula:C39H96O11Si9 CAS:585-88-6 MolWeight:992 RetIndex:2923

CompName:Maltitol-9TMS ; (2S,3R,4R,5R)-4-[(2R,3R,4S,5S,6R)-3,4,5-trihydroxy-6-(hydroxymethyl)oxan-2-yl]oxyhexane-1,2,3,5,6-pentol

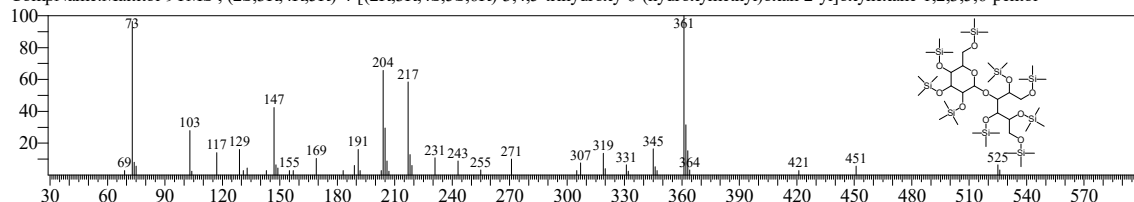

Hit#:3 Entry:552 Library:OA\_TMS\_DB5\_67min\_V3.lib

SI:28 Formula:C36H86O11Si8 CAS:99-20-7 MolWeight:918 RetIndex:2812

CompName:Trehalose-8TMS ; (2R,3S,4S,5R,6R)-2-(hydroxymethyl)-6-[(2R,3R,4S,5S,6R)-3,4,5-trihydroxy-6-(hydroxymethyl)oxan-2-yl]oxyoxane-

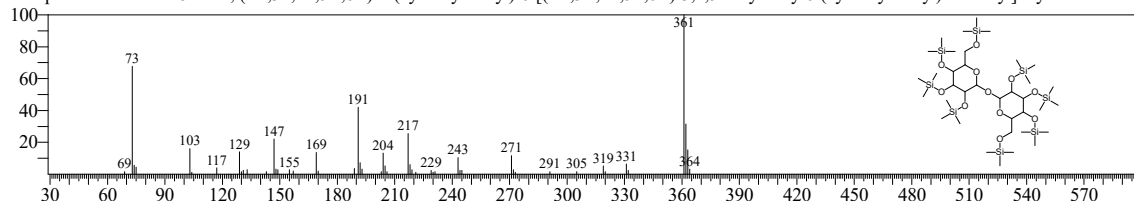

Hit#:4 Entry:561 Library:OA\_TMS\_DB5\_67min\_V3.lib

SI:28 Formula:C37H89NO11Si8 CAS:499-40-1 MolWeight:947 RetIndex:2983

CompName:Isomaltose-meto-8TMS(2) ; (3R,4S,5S,6R)-2-[(2S,3R,4S,5S,6R)-3,4,5-trihydroxy-6-(hydroxymethyl)oxan-2-yl]oxymethyl]oxane-2,3,

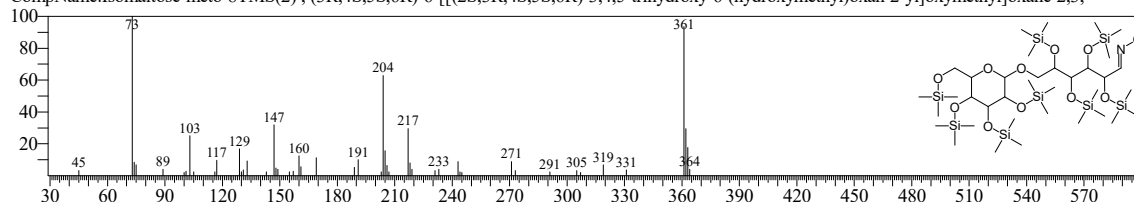

Hit#:5 Entry:556 Library:OA\_TMS\_DB5\_67min\_V3.lib

SI:26 Formula:C37H89NO11Si8 CAS:69-79-4 MolWeight:947 RetIndex:2846

CompName:Maltose-meto-8TMS(2) ; (2R,3S,4S,5R,6R)-2-(hydroxymethyl)-6-[(2R,3S,4R,5R,6R)-4,5,6-trihydroxy-2-(hydroxymethyl)oxan-3-yl]oxy

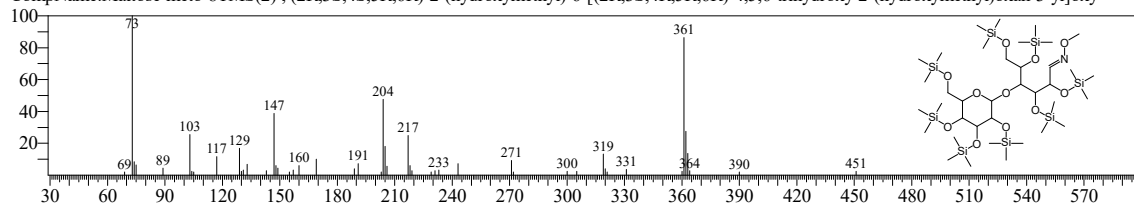

# TNAU

<< Target >>

Line#:19 R.Time:30.355(Scan#:5172) MassPeaks:270

RawMode:Averaged 30.350-30.360(5171-5173) BasePeak:217.10(1588)

BG Mode:Calc. from Peak Group 1 - Event 1 Q3 Scan

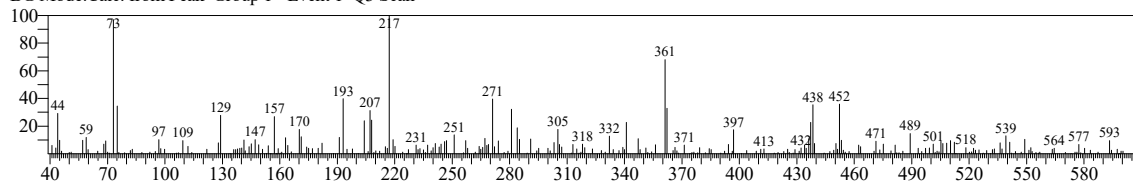

Hit#:1 Entry:541 Library:OA\_TMS\_DB5\_67min\_V3.lib

SI:49 Formula:C36H86O11Si8 CAS:57-50-1 MolWeight:918 RetIndex:2705

CompName:Sucrose-8TMS ; (2R,3R,4S,5S,6R)-2-[(2S,3S,4S,5R)-3,4-dihydroxy-2,5-bis(hydroxymethyl)oxolan-2-yl]oxy-6-(hydroxymethyl)oxane-3



Hit#:2 Entry:559 Library:OA\_TMS\_DB5\_67min\_V3.lib

SI:48 Formula:C39H96O11Si9 CAS:585-88-6 MolWeight:992 RetIndex:2923

CompName:Maltitol-9TMS ; (2S,3R,4R,5R)-4-[(2R,3R,4S,5S,6R)-3,4,5-trihydroxy-6-(hydroxymethyl)oxan-2-yl]oxyhexane-1,2,3,5,6-pentol



Hit#:3 Entry:326 Library:OA\_TMS\_DB5\_67min\_V3.lib

SI:47 Formula:C21H52O6Si5 CAS:23140-52-5 MolWeight:540 RetIndex:1841

CompName:Psicose-5TMS(2) ; (3R,4R,5R)-1,3,4,5,6-pentahydroxyhexan-2-one



Hit#:4 Entry:552 Library:OA\_TMS\_DB5\_67min\_V3.lib

SI:47 Formula:C36H86O11Si8 CAS:99-20-7 MolWeight:918 RetIndex:2812

CompName:Trehalose-8TMS ; (2R,3S,4S,5R,6R)-2-(hydroxymethyl)-6-[(2R,3R,4S,5S,6R)-3,4,5-trihydroxy-6-(hydroxymethyl)oxan-2-yl]oxyoxane-

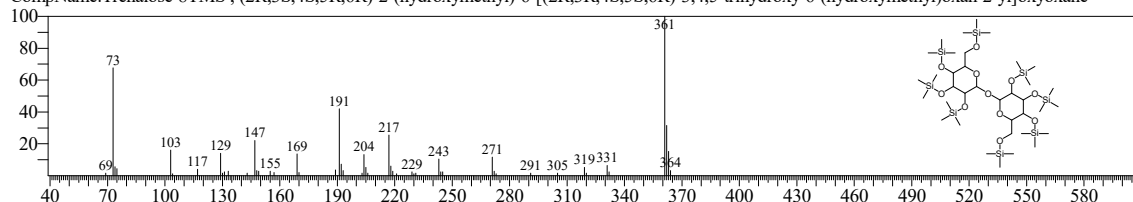

Hit#:5 Entry:323 Library:OA\_TMS\_DB5\_67min\_V3.lib

SI:47 Formula:C21H52O6Si5 CAS:57-48-7 MolWeight:540 RetIndex:1839

CompName:Fructose-5TMS(2) ; (3S,4R,5R)-1,3,4,5,6-pentahydroxyhexan-2-one

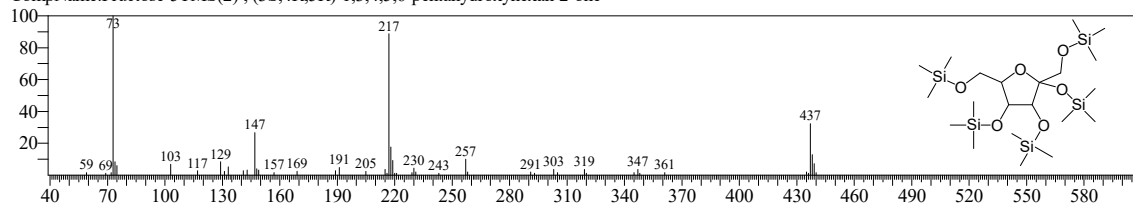

# TNAU

<< Target >>

Line#:20 R.Time:30.385(Scan#:5178) MassPeaks:276

RawMode:Averaged 30.380-30.390(5177-5179) BasePeak:281.05(1204)

BG Mode:Calc. from Peak Group 1 - Event 1 Q3 Scan

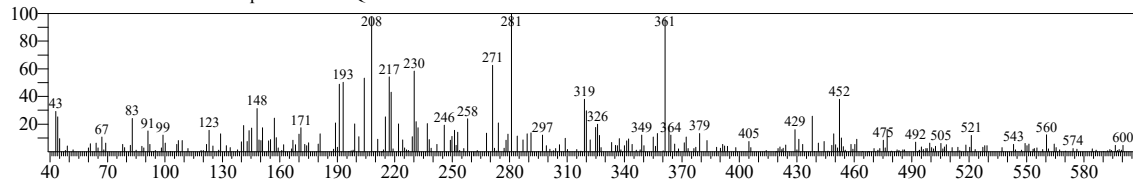

Hit#:1 Entry:552 Library:OA\_TMS\_DB5\_67min\_V3.lib

SI:36 Formula:C36H86O11Si8 CAS:99-20-7 MolWeight:918 RetIndex:2812

CompName:Trehalose-8TMS ; (2R,3S,4S,5R,6R)-2-(hydroxymethyl)-6-[(2R,3R,4S,5S,6R)-3,4,5-trihydroxy-6-(hydroxymethyl)oxan-2-yl]oxyoxane-

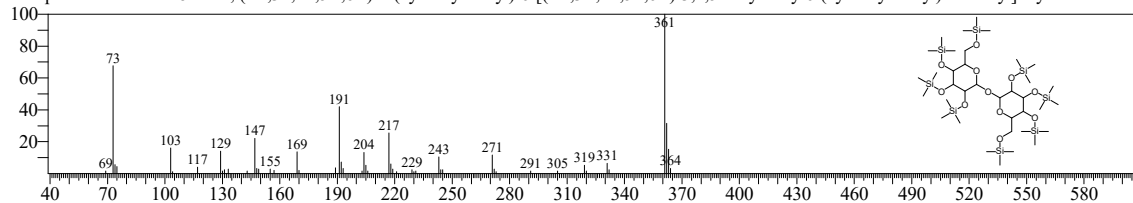

Hit#:2 Entry:559 Library:OA\_TMS\_DB5\_67min\_V3.lib

SI:35 Formula:C39H96O11Si9 CAS:585-88-6 MolWeight:992 RetIndex:2923

CompName:Maltitol-9TMS ; (2S,3R,4R,5R)-4-[(2R,3R,4S,5S,6R)-3,4,5-trihydroxy-6-(hydroxymethyl)oxan-2-yl]oxyhexane-1,2,3,5,6-pentol



Hit#:3 Entry:541 Library:OA\_TMS\_DB5\_67min\_V3.lib

SI:34 Formula:C36H86O11Si8 CAS:57-50-1 MolWeight:918 RetIndex:2705

CompName:Sucrose-8TMS ; (2R,3R,4S,5S,6R)-2-[(2S,3S,4S,5R)-3,4-dihydroxy-2,5-bis(hydroxymethyl)oxolan-2-yl]oxy-6-(hydroxymethyl)oxane-3

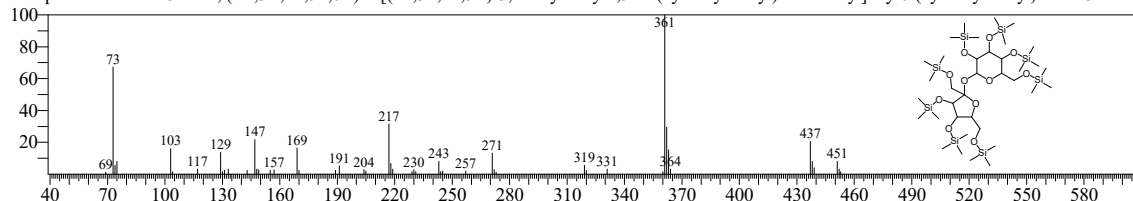

Hit#:4 Entry:560 Library:OA\_TMS\_DB5\_67min\_V3.lib

SI:33 Formula:C37H89NO11Si8 CAS:499-40-1 MolWeight:947 RetIndex:2947

CompName:Isomaltose-meto-8TMS(1) ; (3R,4S,5S,6R)-6-[(2S,3R,4S,5S,6R)-3,4,5-trihydroxy-6-(hydroxymethyl)oxan-2-yl]oxymethyl]oxane-2,3,

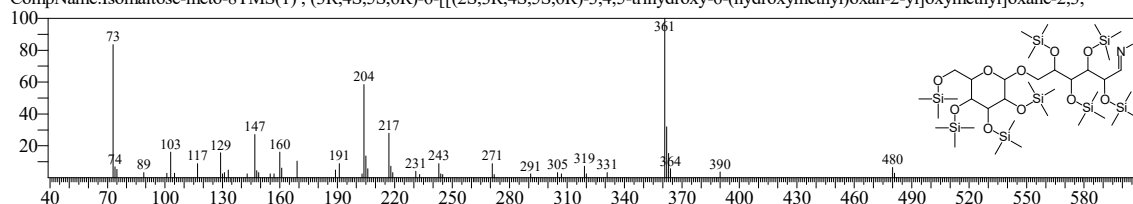

Hit#:5 Entry:555 Library:OA\_TMS\_DB5\_67min\_V3.lib

SI:33 Formula:C39H96O11Si9 CAS:585-86-4 MolWeight:992 RetIndex:2845

CompName:Lactitol-9TMS ; (2S,3R,4R,5R)-4-[(2S,3R,4S,5R,6R)-3,4,5-trihydroxy-6-(hydroxymethyl)oxan-2-yl]oxyhexane-1,2,3,5,6-pentol

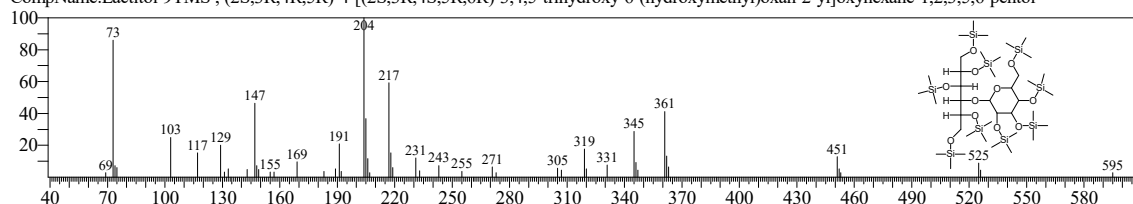

# TNAU

<< Target >>

Line#:21 R.Time:30.470(Scan#:5195) MassPeaks:298

RawMode:Averaged 30.465-30.475(5194-5196) BasePeak:362.20(1826)

BG Mode:Calc. from Peak Group 1 - Event 1 Q3 Scan

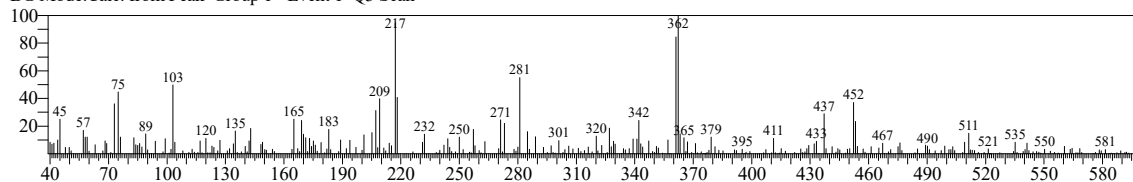

Hit#:1 Entry:541 Library:OA TMS DB5\_67min\_V3.lib

SI:48 Formula:C36H86O11Si8 CAS:57-50-1 MolWeight:918 RetIndex:2705

CompName:Sucrose-8TMS ; (2R,3R,4S,5S,6R)-2-[(2S,3S,4S,5R)-3,4-dihydroxy-2,5-bis(hydroxymethyl)oxolan-2-yl]oxy-6-(hydroxymethyl)oxane-3

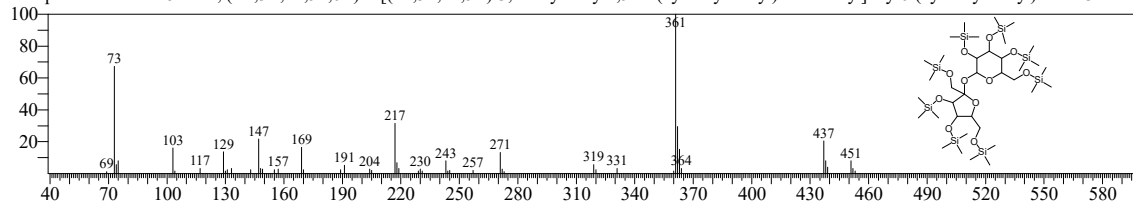

Hit#:2 Entry:561 Library:OA TMS DB5\_67min\_V3.lib

SI:43 Formula:C37H89NO11Si8 CAS:499-40-1 MolWeight:947 RetIndex:2983

CompName:Isomaltose-meto-8TMS(2) ; (3R,4S,5S,6R)-6-[[[(2S,3R,4S,5S,6R)-3,4,5-trihydroxy-6-(hydroxymethyl)oxan-2-yl]oxymethyl]oxane-2,3,

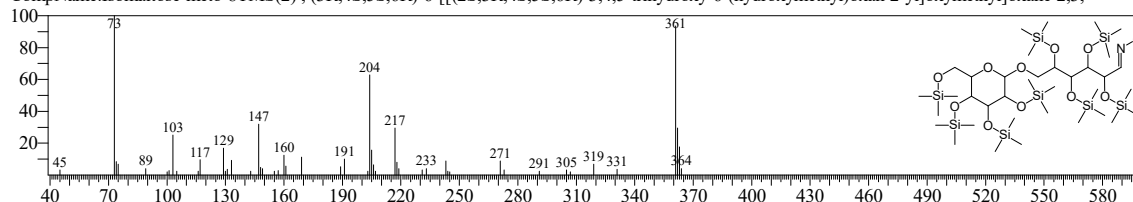

Hit#:3 Entry:559 Library:OA TMS DB5\_67min\_V3.lib

SI:42 Formula:C39H96O11Si9 CAS:585-88-6 MolWeight:992 RetIndex:2923

CompName:Maltitol-9TMS ; (2S,3R,4R,5R)-4-[(2R,3R,4S,5S,6R)-3,4,5-trihydroxy-6-(hydroxymethyl)oxan-2-yl]oxyhexane-1,2,3,5,6-pentol

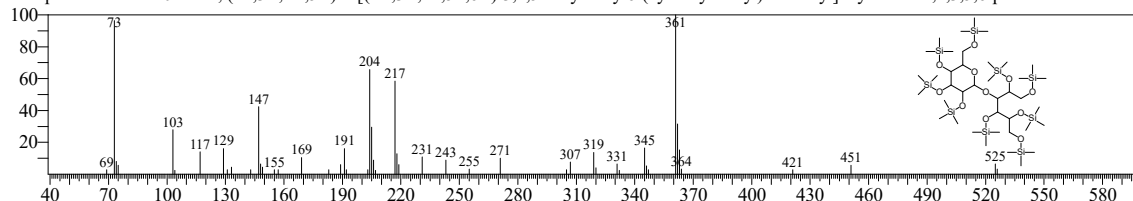

Hit#:4 Entry:552 Library:OA TMS DB5\_67min\_V3.lib

SI:42 Formula:C36H86O11Si8 CAS:99-20-7 MolWeight:918 RetIndex:2812

CompName:Trehalose-8TMS ; (2R,3S,4S,5R,6R)-2-(hydroxymethyl)-6-[(2R,3R,4S,5S,6R)-3,4,5-trihydroxy-6-(hydroxymethyl)oxan-2-yl]oxyoxane-

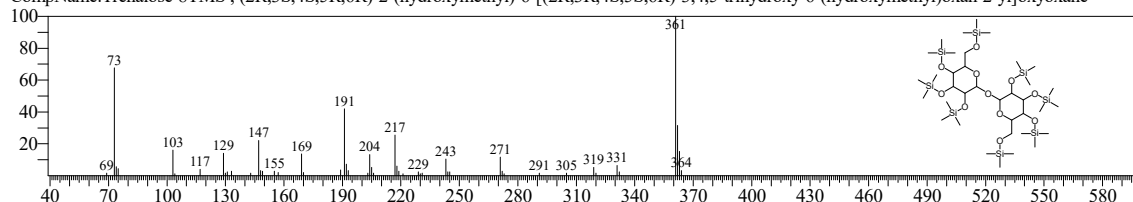

Hit#:5 Entry:553 Library:OA TMS DB5\_67min\_V3.lib

SI:40 Formula:C37H89NO11Si8 CAS:69-79-4 MolWeight:947 RetIndex:2817

CompName:Maltose-meto-8TMS(1) ; (2R,3S,4S,5R,6R)-2-(hydroxymethyl)-6-[(2R,3S,4R,5R,6R)-4,5,6-trihydroxy-2-(hydroxymethyl)oxan-3-yl]oxy

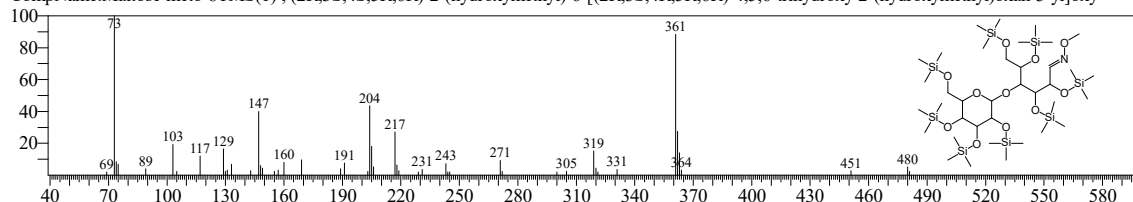

# TNAU

<< Target >>

Line#:22 R.Time:30.515(Scan#:5204) MassPeaks:258

RawMode:Averaged 30.510-30.520(5203-5205) BasePeak:361.20(2617)

BG Mode:Calc. from Peak Group 1 - Event 1 Q3 Scan

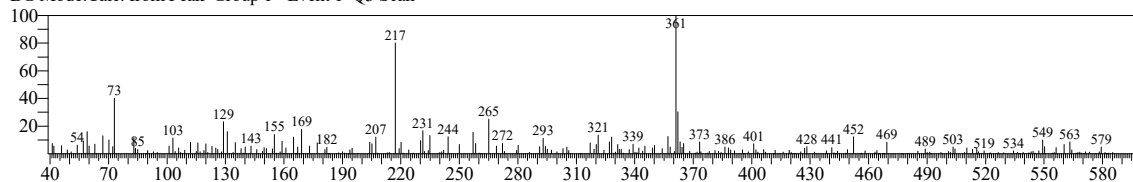

Hit#:1 Entry:541 Library:OA TMS DB5\_67min\_V3.lib

SI:53 Formula:C36H86O11Si8 CAS:57-50-1 MolWeight:918 RetIndex:2705

CompName:Sucrose-8TMS ; (2R,3R,4S,5S,6R)-2-[(2S,3S,4S,5R)-3,4-dihydroxy-2,5-bis(hydroxymethyl)oxolan-2-yl]oxy-6-(hydroxymethyl)oxane-3

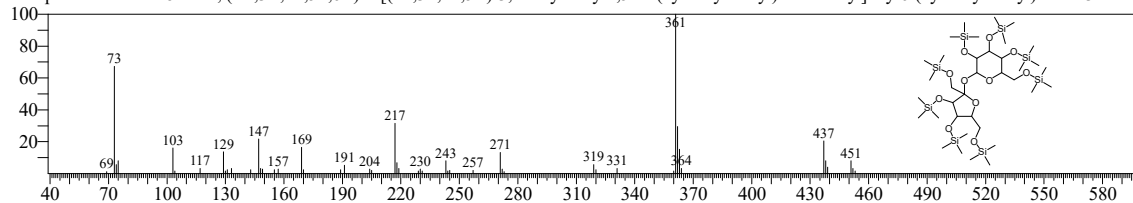

Hit#:2 Entry:552 Library:OA TMS DB5\_67min\_V3.lib

SI:51 Formula:C36H86O11Si8 CAS:99-20-7 MolWeight:918 RetIndex:2812

CompName:Trehalose-8TMS ; (2R,3S,4S,5R,6R)-2-(hydroxymethyl)-6-[(2R,3R,4S,5S,6R)-3,4,5-trihydroxy-6-(hydroxymethyl)oxan-2-yl]oxyoxane-

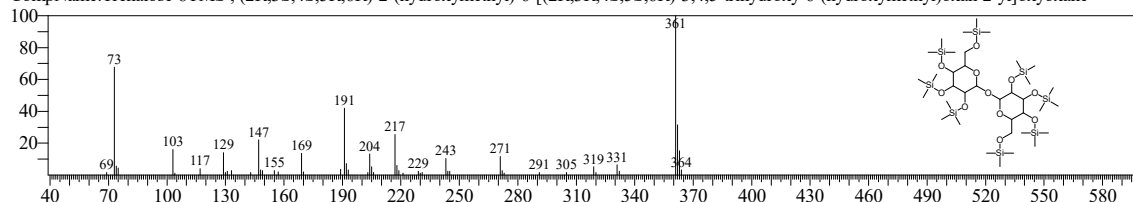

Hit#:3 Entry:561 Library:OA TMS DB5\_67min\_V3.lib

SI:50 Formula:C37H89NO11Si8 CAS:499-40-1 MolWeight:947 RetIndex:2983

CompName:Isomaltose-meto-8TMS(2) ; (3R,4S,5S,6R)-6-[[[(2S,3R,4S,5S,6R)-3,4,5-trihydroxy-6-(hydroxymethyl)oxan-2-yl]oxymethyl]oxane-2,3,

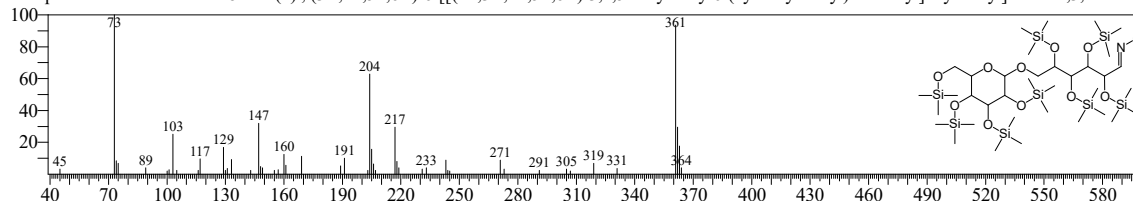

Hit#:4 Entry:559 Library:OA TMS DB5\_67min\_V3.lib

SI:50 Formula:C39H96O11Si9 CAS:585-88-6 MolWeight:992 RetIndex:2923

CompName:Maltitol-9TMS ; (2S,3R,4R,5R)-4-[(2R,3R,4S,5S,6R)-3,4,5-trihydroxy-6-(hydroxymethyl)oxan-2-yl]oxyhexane-1,2,3,5,6-pentol

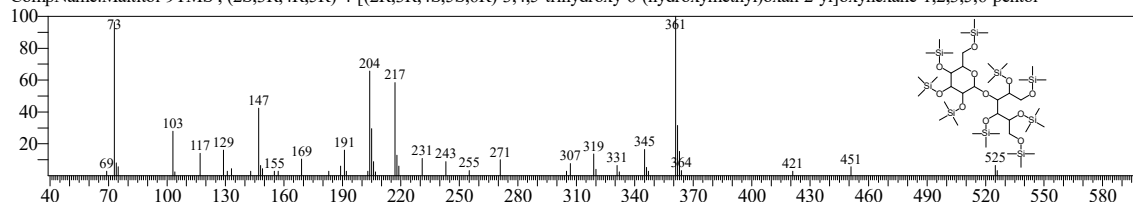

Hit#:5 Entry:553 Library:OA TMS DB5\_67min\_V3.lib

SI:49 Formula:C37H89NO11Si8 CAS:69-79-4 MolWeight:947 RetIndex:2817

CompName:Maltose-meto-8TMS(1) ; (2R,3S,4S,5R,6R)-2-(hydroxymethyl)-6-[(2R,3S,4R,5R,6R)-4,5,6-trihydroxy-2-(hydroxymethyl)oxan-3-yl]oxy

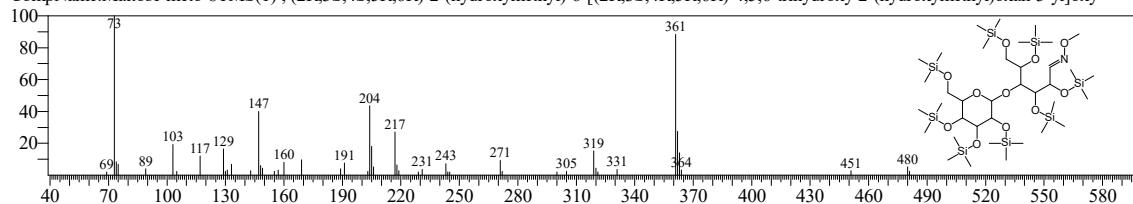



# TNAU

<< Target >>

Line#:23 R.Time:30.560(Scan#:5213) MassPeaks:272

RawMode:Averaged 30.555-30.565(5212-5214) BasePeak:207.05(1317)

BG Mode:Calc. from Peak Group 1 - Event 1 Q3 Scan

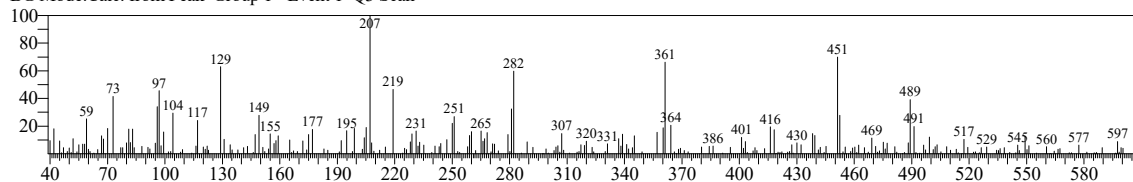

Hit#:1 Entry:559 Library:OA.TMS.DB5\_67min\_V3.lib

SI:35 Formula:C39H96O11Si9 CAS:585-88-6 MolWeight:992 RetIndex:2923

CompName:Maltitol-9TMS ; (2S,3R,4R,5R)-4-[(2R,3R,4S,5S,6R)-3,4,5-trihydroxy-6-(hydroxymethyl)oxan-2-yl]oxyhexane-1,2,3,5,6-pentol

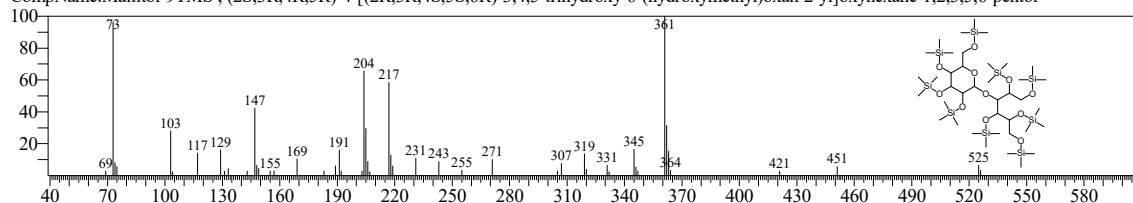

Hit#:2 Entry:541 Library:OA.TMS.DB5\_67min\_V3.lib

SI:33 Formula:C36H86O11Si8 CAS:57-50-1 MolWeight:918 RetIndex:2705

CompName:Sucrose-8TMS ; (2R,3R,4S,5S,6R)-2-[(2S,3S,4S,5R)-3,4-dihydroxy-2,5-bis(hydroxymethyl)oxolan-2-yl]oxy-6-(hydroxymethyl)oxane-3

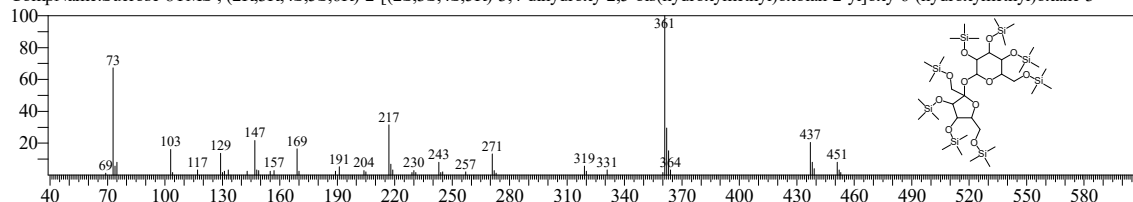

Hit#:3 Entry:556 Library:OA.TMS.DB5\_67min\_V3.lib

SI:31 Formula:C37H89NO11Si8 CAS:69-79-4 MolWeight:947 RetIndex:2846

CompName:Maltose-meto-8TMS(2) ; (2R,3S,4S,5R,6R)-2-(hydroxymethyl)-6-[(2R,3S,4R,5R,6R)-4,5,6-trihydroxy-2-(hydroxymethyl)oxan-3-yl]oxy

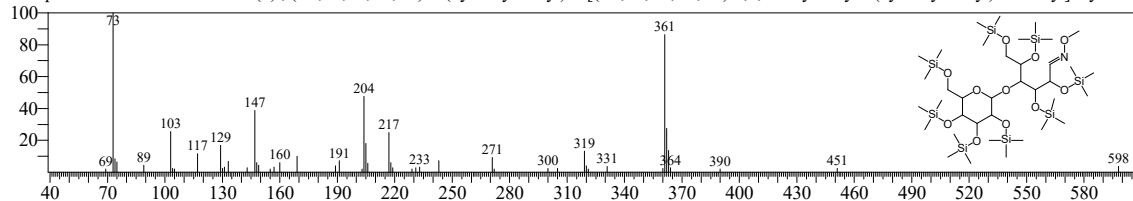

Hit#:4 Entry:561 Library:OA.TMS.DB5\_67min\_V3.lib

SI:30 Formula:C37H89NO11Si8 CAS:499-40-1 MolWeight:947 RetIndex:2983

CompName:Isomaltose-meto-8TMS(2) ; (3R,4S,5S,6R)-6-[(2S,3R,4S,5S,6R)-3,4,5-trihydroxy-6-(hydroxymethyl)oxan-2-yl]oxymethyl]oxane-2,3,

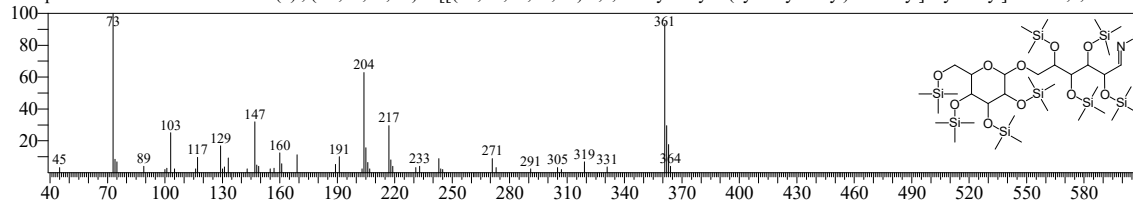

Hit#:5 Entry:545 Library:OA.TMS.DB5\_67min\_V3.lib

SI:29 Formula:C37H89NO11Si8 CAS:63-42-3 MolWeight:947 RetIndex:2760

CompName:Lactose-meto-8TMS(1) ; (2R,3R,4S,5R,6S)-2-(hydroxymethyl)-6-[(2R,3S,4R,5R,6R)-4,5,6-trihydroxy-2-(hydroxymethyl)oxan-3-yl]oxy

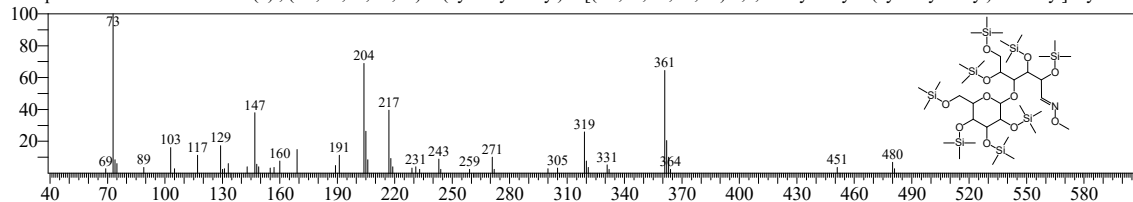

# TNAU

<< Target >>

Line#:24 R.Time:30.695(Scan#:5240) MassPeaks:311

RawMode:Averaged 30.690-30.700(5239-5241) BasePeak:361.20(1721)

BG Mode:Calc. from Peak Group 1 - Event 1 Q3 Scan

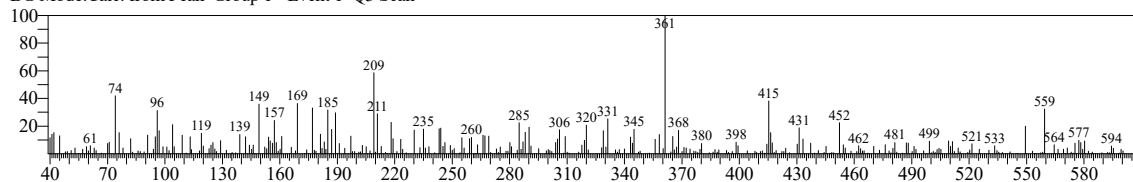

Hit#:1 Entry:541 Library:OA\_TMS\_DB5\_67min\_V3.lib

SI:28 Formula:C36H86O11Si8 CAS:57-50-1 MolWeight:918 RetIndex:2705

CompName:Sucrose-8TMS ; (2R,3R,4S,5S,6R)-2-[(2S,3S,4S,5R)-3,4-dihydroxy-2,5-bis(hydroxymethyl)oxolan-2-yl]oxy-6-(hydroxymethyl)oxane-3



Hit#:2 Entry:552 Library:OA\_TMS\_DB5\_67min\_V3.lib

SI:27 Formula:C36H86O11Si8 CAS:99-20-7 MolWeight:918 RetIndex:2812

CompName:Trehalose-8TMS ; (2R,3S,4S,5R,6R)-2-(hydroxymethyl)-6-[(2R,3R,4S,5S,6R)-3,4,5-trihydroxy-6-(hydroxymethyl)oxan-2-yl]oxyoxane-



Hit#:3 Entry:559 Library:OA\_TMS\_DB5\_67min\_V3.lib

SI:25 Formula:C39H96O11Si9 CAS:585-88-6 MolWeight:992 RetIndex:2923

CompName:Maltitol-9TMS ; (2S,3R,4R,5R)-4-[(2R,3R,4S,5S,6R)-3,4,5-trihydroxy-6-(hydroxymethyl)oxan-2-yl]oxyhexane-1,2,3,5,6-pentol

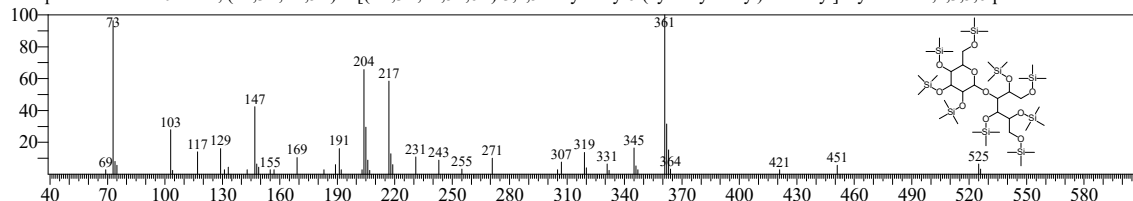

Hit#:4 Entry:560 Library:OA\_TMS\_DB5\_67min\_V3.lib

SI:25 Formula:C37H89NO11Si8 CAS:499-40-1 MolWeight:947 RetIndex:2947

CompName:Isomaltose-meto-8TMS (1) ; (3R,4S,5S,6R)-6-[(2S,3R,4S,5S,6R)-3,4,5-trihydroxy-6-(hydroxymethyl)oxan-2-yl]oxymethyl]oxane-2,3,

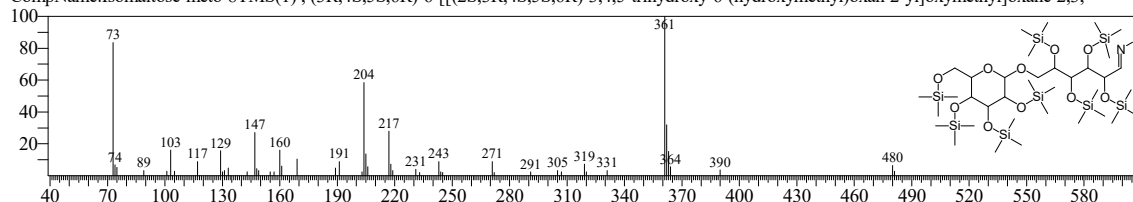

Hit#:5 Entry:412 Library:OA\_TMS\_DB5\_67min\_V3.lib

SI:20 Formula: CAS:0-00-0 MolWeight:403 RetIndex:1957

CompName:Tyrosine-13C6-3TMS ;

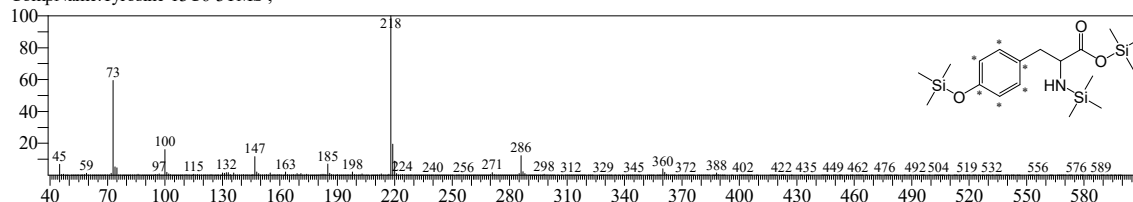

# TNAU

<< Target >>

Line#:25 R.Time:30.730(Scan#:5247) MassPeaks:284

RawMode:Averaged 30.725-30.735(5246-5248) BasePeak:361.20(1509)

BG Mode:Calc. from Peak Group 1 - Event 1 Q3 Scan

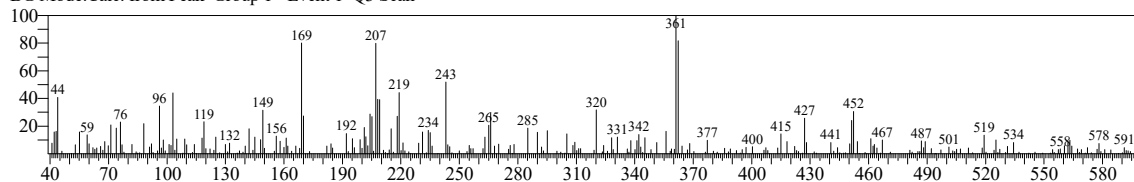

Hit#:1 Entry:559 Library:OA TMS DB5 67min V3.lib

SI:39 Formula:C39H96O11Si9 CAS:585-88-6 MolWeight:992 RetIndex:2923

CompName:Maltitol-9TMS ; (2S,3R,4R,5R)-4-[(2R,3R,4S,5S,6R)-3,4,5-trihydroxy-6-(hydroxymethyl)oxan-2-yl]oxyhexane-1,2,3,5,6-pentol

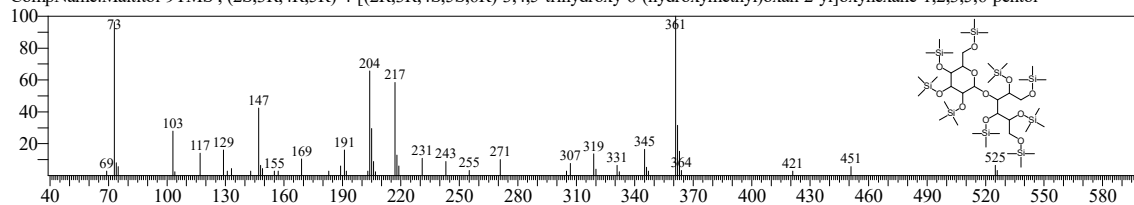

Hit#:2 Entry:555 Library:OA TMS DB5 67min V3.lib

SI:37 Formula:C39H96O11Si9 CAS:585-86-4 MolWeight:992 RetIndex:2845

CompName:Lactitol-9TMS ; (2S,3R,4R,5R)-4-[(2S,3R,4S,5R,6R)-3,4,5-trihydroxy-6-(hydroxymethyl)oxan-2-yl]oxyhexane-1,2,3,5,6-pentol

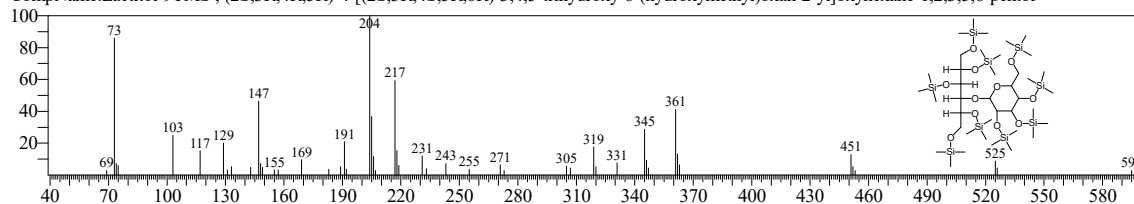

Hit#:3 Entry:552 Library:OA TMS DB5 67min V3.lib

SI:35 Formula:C36H86O11Si8 CAS:99-20-7 MolWeight:918 RetIndex:2812

CompName:Trehalose-8TMS ; (2R,3S,4S,5R,6R)-2-(hydroxymethyl)-6-[(2R,3R,4S,5S,6R)-3,4,5-trihydroxy-6-(hydroxymethyl)oxan-2-yl]oxyoxane-

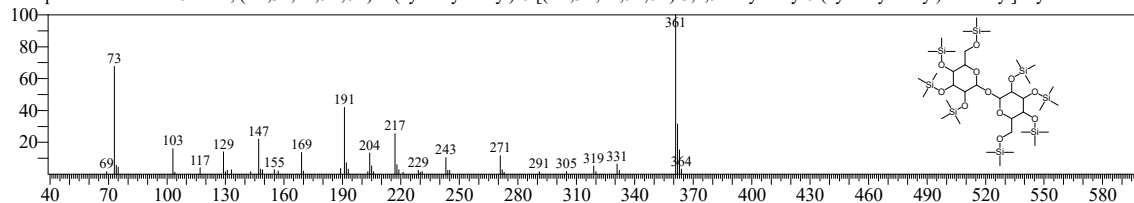

Hit#:4 Entry:541 Library:OA TMS DB5 67min V3.lib

SI:35 Formula:C36H86O11Si8 CAS:57-50-1 MolWeight:918 RetIndex:2705

CompName:Sucrose-8TMS ; (2R,3R,4S,5S,6R)-2-[(2S,3S,4S,5R)-3,4-dihydroxy-2,5-bis(hydroxymethyl)oxolan-2-yl]oxy-6-(hydroxymethyl)oxane-3

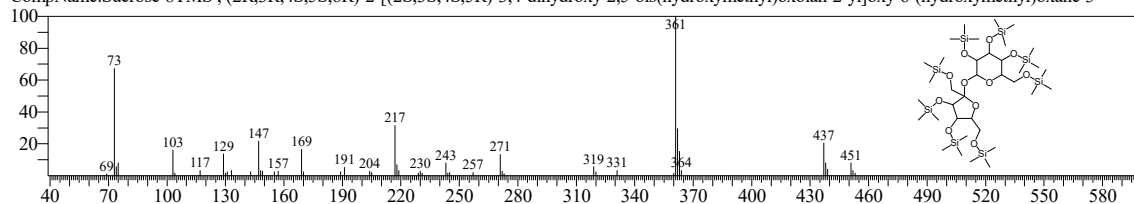

Hit#:5 Entry:560 Library:OA TMS DB5 67min V3.lib

SI:35 Formula:C37H89NO11Si8 CAS:499-40-1 MolWeight:947 RetIndex:2947

CompName:Isomaltose-meto-8TMS(1) ; (3R,4S,5S,6R)-6-[(2S,3R,4S,5S,6R)-3,4,5-trihydroxy-6-(hydroxymethyl)oxan-2-yl]oxymethyl]oxane-2,3,

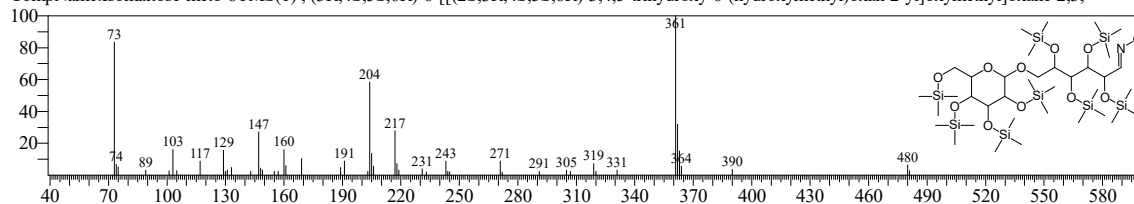

# TNAU

<< Target >>

Line#:26 R.Time:30.755(Scan#:5252) MassPeaks:294

RawMode:Averaged 30.750-30.760(5251-5253) BasePeak:147.05(898)

BG Mode:Calc. from Peak Group 1 - Event 1 Q3 Scan

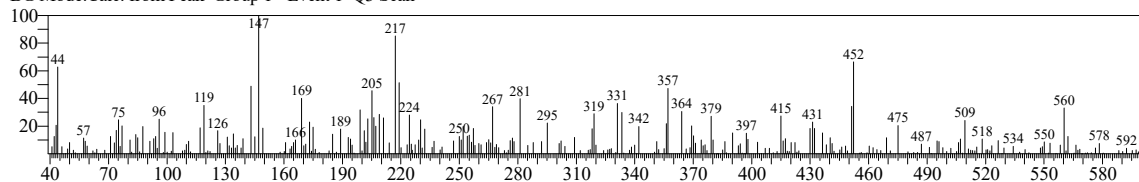

Hit#:1 Entry:227 Library:OA\_TMS\_DB5\_67min\_V3.lib

SI:25 Formula:C17H42O5Si4 CAS:50-69-1 MolWeight:438 RetIndex:1657

CompName:Ribose-4TMS(1) ; (3R,4S,5R)-5-(hydroxymethyl)oxolane-2,3,4-triol

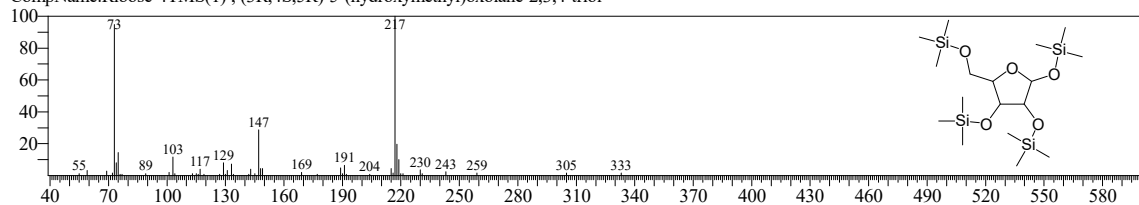

Hit#:2 Entry:80 Library:OA\_TMS\_DB5\_67min\_V3.lib

SI:25 Formula:C11H24O4Si2 CAS:601-75-2 MolWeight:276 RetIndex:1284

CompName:Ethylmalonic acid-2TMS ; 2-ethylpropanedioic acid

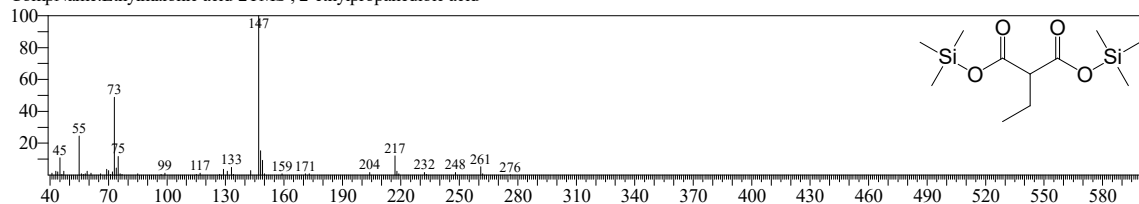

Hit#:3 Entry:95 Library:OA\_TMS\_DB5\_67min\_V3.lib

SI:24 Formula:C11H24O4Si2 CAS:498-21-5 MolWeight:276 RetIndex:1327

CompName:Methylsuccinic acid-2TMS ; 2-methylbutanedioic acid

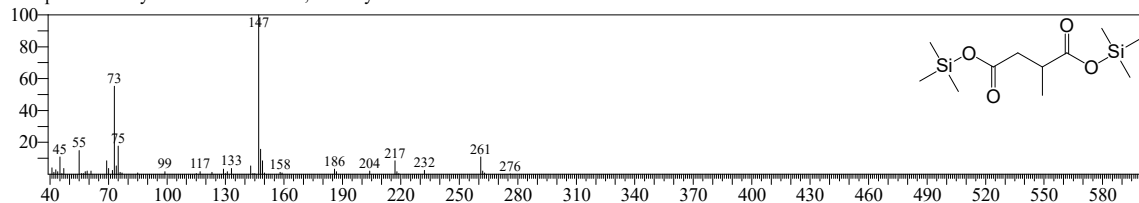

Hit#:4 Entry:174 Library:OA\_TMS\_DB5\_67min\_V3.lib

SI:24 Formula:C13H28O5Si3 CAS:328-42-7 MolWeight:348 RetIndex:1560

CompName:Oxalacetic acid-3TMS ; 2-oxobutanedioic acid

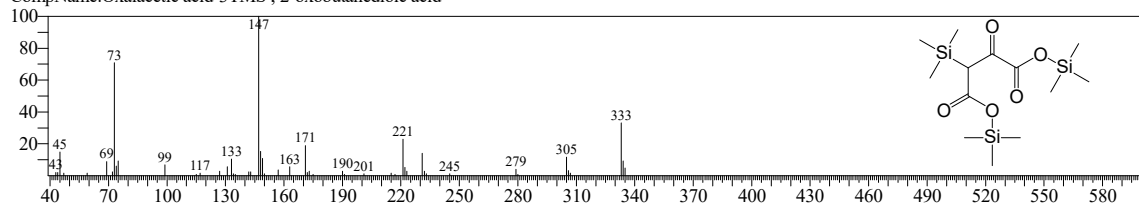

Hit#:5 Entry:326 Library:OA\_TMS\_DB5\_67min\_V3.lib

SI:24 Formula:C21H52O6Si5 CAS:23140-52-5 MolWeight:540 RetIndex:1841

CompName:Psicose-5TMS(2) ; (3R,4R,5R)-1,3,4,5,6-pentahydroxyhexan-2-one

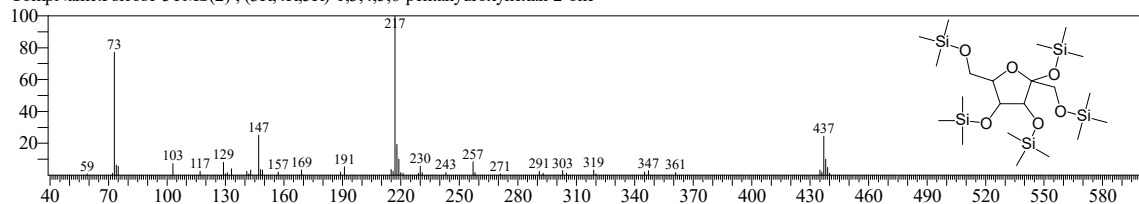

# TNAU

<< Target >>

Line#:27 R.Time:30.790(Scan#:5259) MassPeaks:294

RawMode:Averaged 30.785-30.795(5258-5260) BasePeak:217.10(2690)

BG Mode:Calc. from Peak Group 1 - Event 1 Q3 Scan

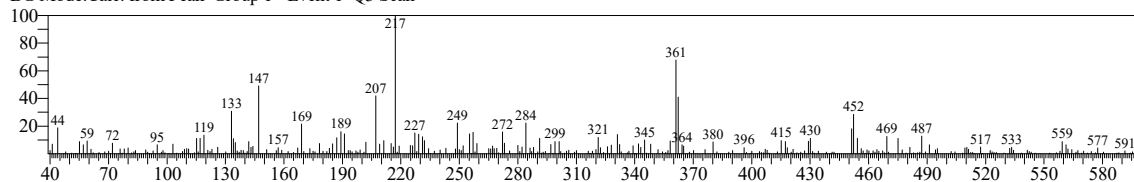

Hit#:1 Entry:559 Library:OA TMS DB5 67min V3.lib

SI:42 Formula:C39H96O11Si9 CAS:585-88-6 MolWeight:992 RetIndex:2923

CompName:Maltitol-9TMS ; (2S,3R,4R,5R)-4-[(2R,3R,4S,5S,6R)-3,4,5-trihydroxy-6-(hydroxymethyl)oxan-2-yl]oxyhexane-1,2,3,5,6-pentol

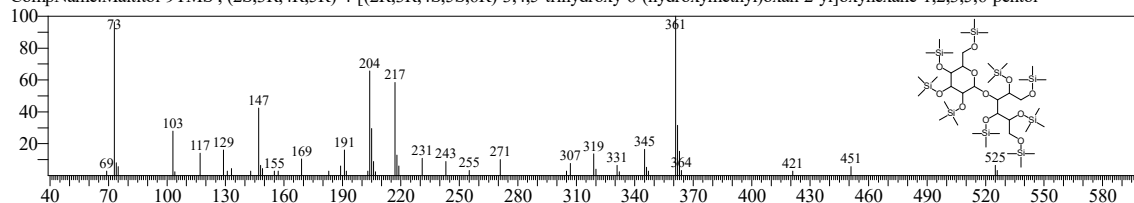

Hit#:2 Entry:541 Library:OA TMS DB5 67min V3.lib

SI:41 Formula:C36H86O11Si8 CAS:57-50-1 MolWeight:918 RetIndex:2705

CompName:Sucrose-8TMS ; (2R,3R,4S,5S,6R)-2-[(2S,3S,4S,5R)-3,4-dihydroxy-2,5-bis(hydroxymethyl)oxolan-2-yl]oxy-6-(hydroxymethyl)oxane-3

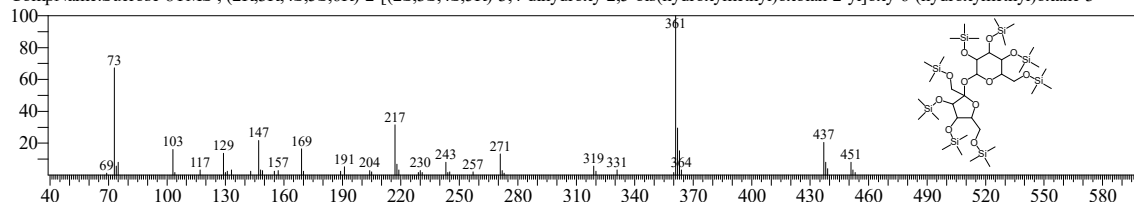

Hit#:3 Entry:552 Library:OA TMS DB5 67min V3.lib

SI:40 Formula:C36H86O11Si8 CAS:99-20-7 MolWeight:918 RetIndex:2812

CompName:Trehalose-8TMS ; (2R,3S,4S,5R,6R)-2-(hydroxymethyl)-6-[(2R,3R,4S,5S,6R)-3,4,5-trihydroxy-6-(hydroxymethyl)oxan-2-yl]oxyoxane-

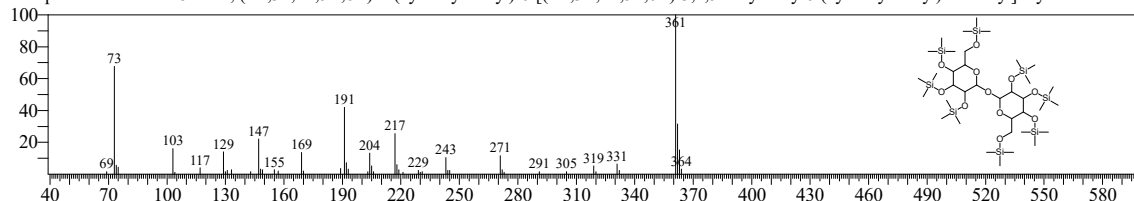

Hit#:4 Entry:560 Library:OA TMS DB5 67min V3.lib

SI:36 Formula:C37H89NO11Si8 CAS:499-40-1 MolWeight:947 RetIndex:2947

CompName:Isomaltose-meto-8TMS(1) ; (3R,4S,5S,6R)-6-[(2S,3R,4S,5S,6R)-3,4,5-trihydroxy-6-(hydroxymethyl)oxan-2-yl]oxymethyl]oxane-2,3,

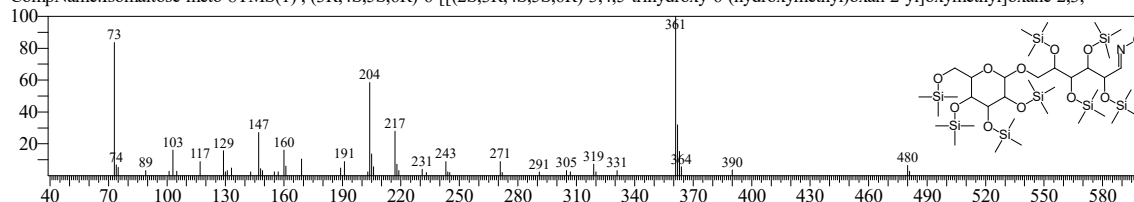

Hit#:5 Entry:326 Library:OA TMS DB5 67min V3.lib

SI:34 Formula:C21H52O6Si5 CAS:23140-52-5 MolWeight:540 RetIndex:1841

CompName:Psicose-5TMS(2) ; (3R,4R,5R)-1,3,4,5,6-pentahydroxyhexan-2-one

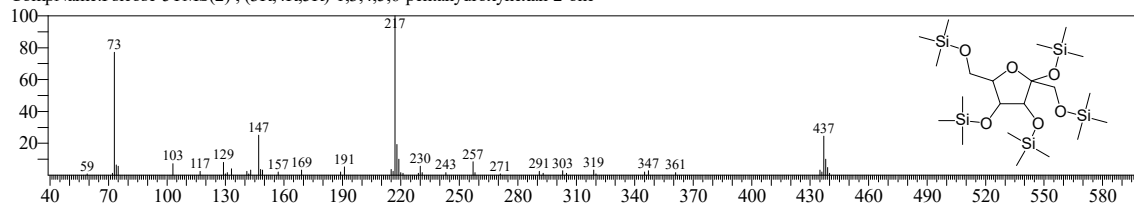

# TNAU

<< Target >>

Line#:28 R.Time:30.900(Scan#:5281) MassPeaks:319

RawMode:Averaged 30.895-30.905(5280-5282) BasePeak:217.10(8126)

BG Mode:Calc. from Peak Group 1 - Event 1 Q3 Scan

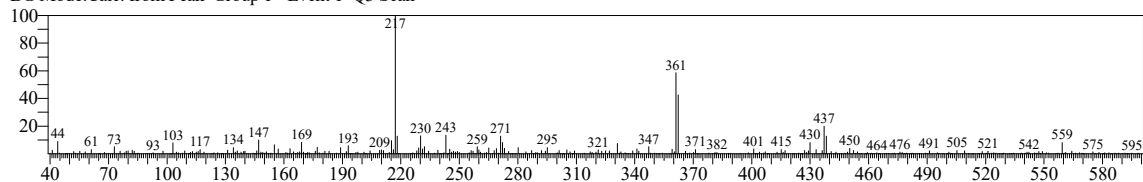

Hit#:1 Entry:541 Library:OA\_TMS\_DB5\_67min\_V3.lib

SI:62 Formula:C36H86O11Si8 CAS:57-50-1 MolWeight:918 RetIndex:2705

CompName:Sucrose-8TMS ; (2R,3R,4S,5S,6R)-2-[(2S,3S,4S,5R)-3,4-dihydroxy-2,5-bis(hydroxymethyl)oxolan-2-yl]oxy-6-(hydroxymethyl)oxane-3

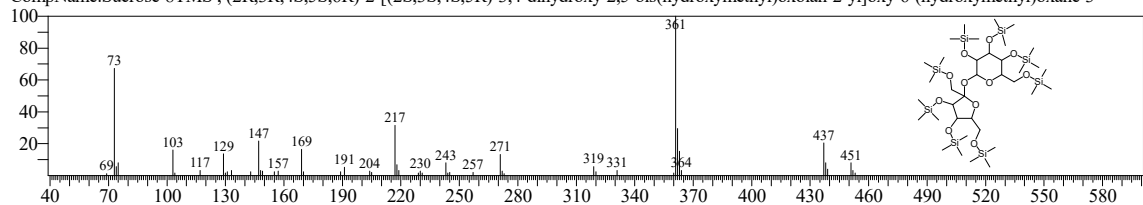

Hit#:2 Entry:326 Library:OA\_TMS\_DB5\_67min\_V3.lib

SI:57 Formula:C21H52O6Si5 CAS:23140-52-5 MolWeight:540 RetIndex:1841

CompName:Psicose-5TMS(2) ; (3R,4R,5R)-1,3,4,5,6-pentahydroxyhexan-2-one

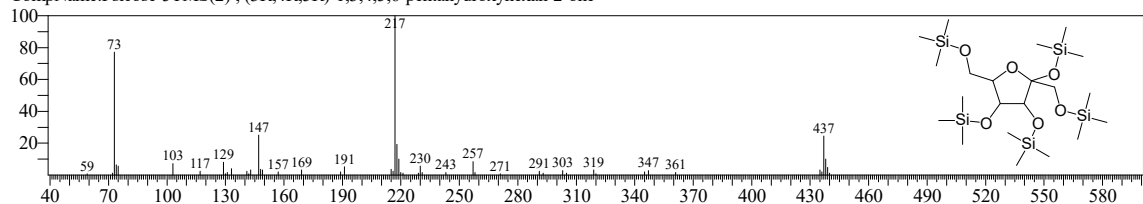

Hit#:3 Entry:552 Library:OA\_TMS\_DB5\_67min\_V3.lib

SI:56 Formula:C36H86O11Si8 CAS:99-20-7 MolWeight:918 RetIndex:2812

CompName:Trehalose-8TMS ; (2R,3S,4S,5R,6R)-2-(hydroxymethyl)-6-[(2R,3R,4S,5S,6R)-3,4,5-trihydroxy-6-(hydroxymethyl)oxan-2-yl]oxyoxane-

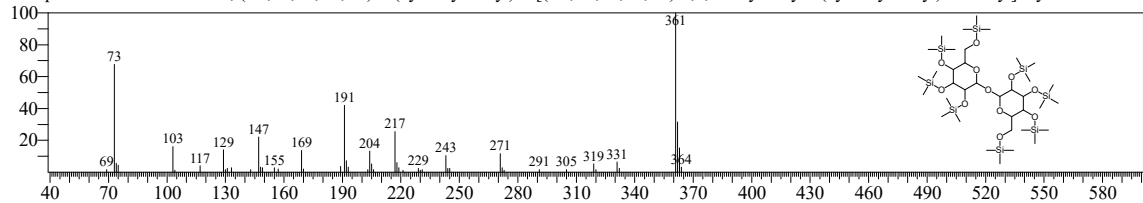

Hit#:4 Entry:323 Library:OA\_TMS\_DB5\_67min\_V3.lib

SI:55 Formula:C21H52O6Si5 CAS:57-48-7 MolWeight:540 RetIndex:1839

CompName:Fructose-5TMS(2) ; (3S,4R,5R)-1,3,4,5,6-pentahydroxyhexan-2-one

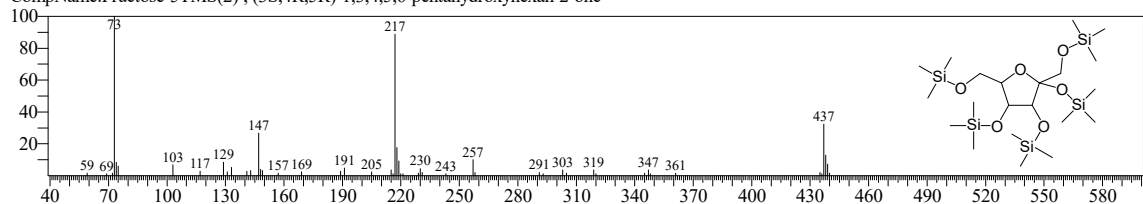

Hit#:5 Entry:553 Library:OA\_TMS\_DB5\_67min\_V3.lib

SI:51 Formula:C37H89NO11Si8 CAS:69-79-4 MolWeight:947 RetIndex:2817

CompName:Maltose-meto-8TMS(1) ; (2R,3S,4S,5R,6R)-2-(hydroxymethyl)-6-[(2R,3S,4R,5R,6R)-4,5,6-trihydroxy-2-(hydroxymethyl)oxan-3-yl]oxy

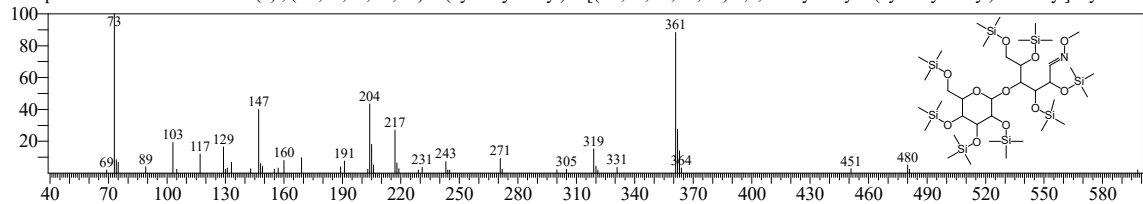

# TNAU

<< Target >>

Line#:29 R.Time:31.030(Scan#:5307) MassPeaks:274

RawMode:Averaged 31.025-31.035(5306-5308) BasePeak:205.00(1013)

BG Mode:Calc. from Peak Group 1 - Event 1 Q3 Scan

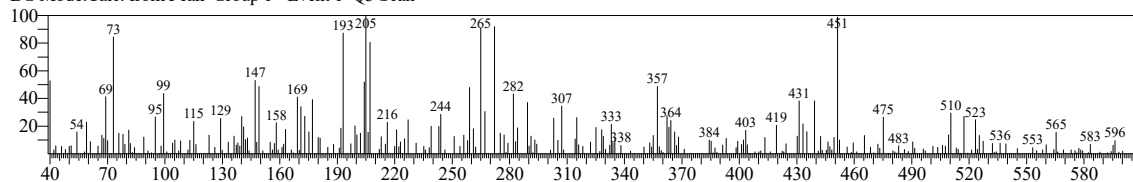

Hit#:1 Entry:545 Library:OA\_TMS\_DB5\_67min\_V3.lib

SI:33 Formula:C37H89NO11Si8 CAS:63-42-3 MolWeight:947 RetIndex:2760

CompName:Lactose-meto-8TMS(1) ; (2R,3R,4S,5R,6S)-2-(hydroxymethyl)-6-[(2R,3S,4R,5R,6R)-4,5,6-trihydroxy-2-(hydroxymethyl)oxan-3-yl]oxy

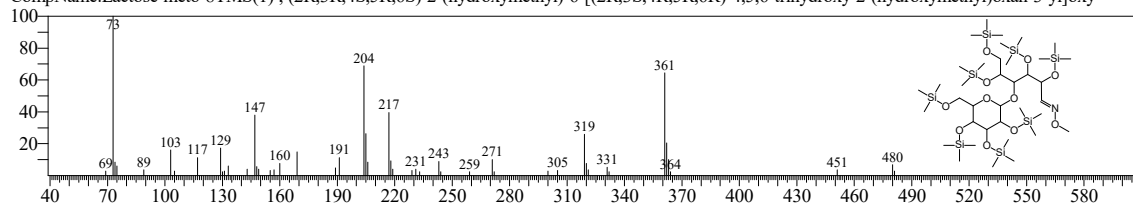

Hit#:2 Entry:267 Library:OA\_TMS\_DB5\_67min\_V3.lib

SI:32 Formula:C17H42O5Si4 CAS:58-86-6 MolWeight:438 RetIndex:1732

CompName:Xylose-4TMS(1) ; (2R,3S,4R)-2,3,4,5-tetrahydroxypentanal

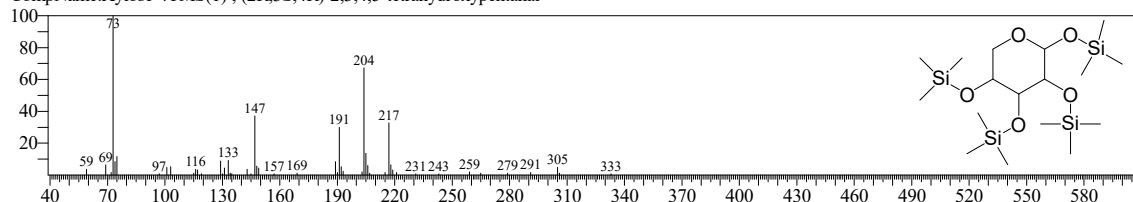

Hit#:3 Entry:250 Library:OA\_TMS\_DB5\_67min\_V3.lib

SI:32 Formula:C17H42O5Si4 CAS:50-69-1 MolWeight:438 RetIndex:1691

CompName:Ribose-4TMS(4) ; (3R,4S,5R)-5-(hydroxymethyl)oxolane-2,3,4-triol

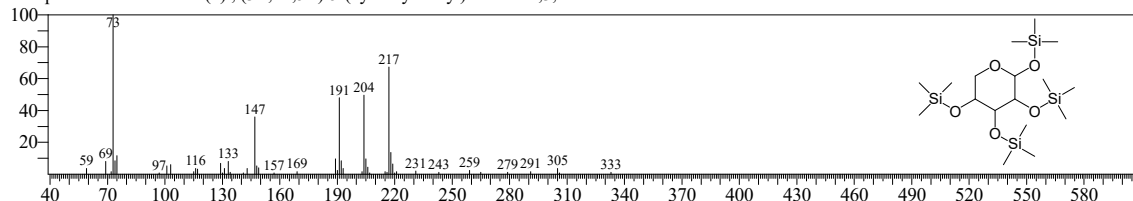

Hit#:4 Entry:238 Library:OA\_TMS\_DB5\_67min\_V3.lib

SI:32 Formula:C17H42O5Si4 CAS:1114-34-7 MolWeight:438 RetIndex:1675

CompName:Lyxose-4TMS(2) ; (2S,3S,4R)-2,3,4,5-tetrahydroxypentanal

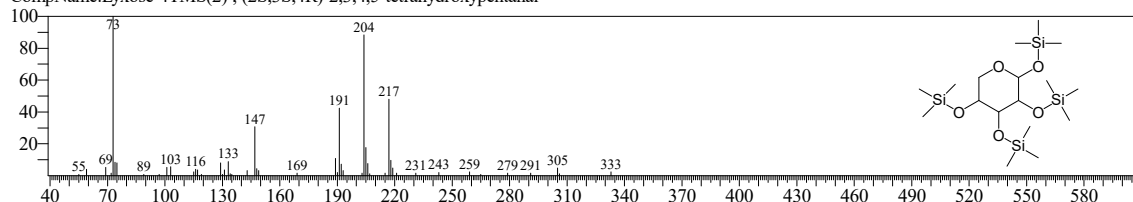

Hit#:5 Entry:276 Library:OA\_TMS\_DB5\_67min\_V3.lib

SI:31 Formula:C18H44O5Si4 CAS:154-17-6 MolWeight:452 RetIndex:1745

CompName:2-Deoxy-glucose-4TMS(1) ; (2S,4S,5S,6S)-6-(hydroxymethyl)oxane-2,4,5-triol

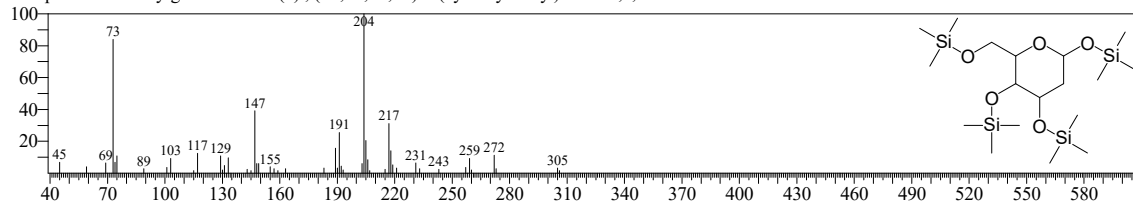

# TNAU

<< Target >>

Line#:30 R.Time:31.190(Scan#:5339) MassPeaks:308

RawMode:Averaged 31.185-31.195(5338-5340) BasePeak:361.20(7496)

BG Mode:Calc. from Peak Group 1 - Event 1 Q3 Scan

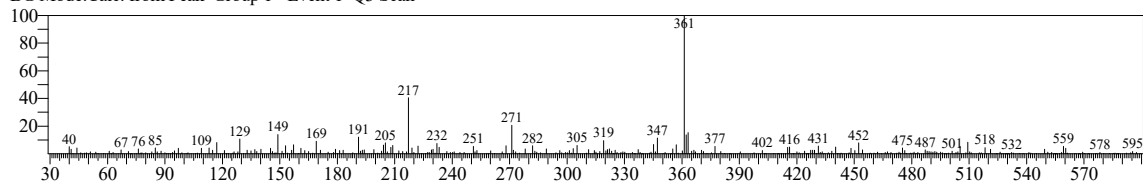

Hit#:1 Entry:552 Library:OA\_TMS\_DB5\_67min\_V3.lib

SI:54 Formula:C36H86O11Si8 CAS:99-20-7 MolWeight:918 RetIndex:2812

CompName:Trehalose-8TMS ; (2R,3S,4S,5R,6R)-2-(hydroxymethyl)-6-[(2R,3R,4S,5S,6R)-3,4,5-trihydroxy-6-(hydroxymethyl)oxan-2-yl]oxyoxane-

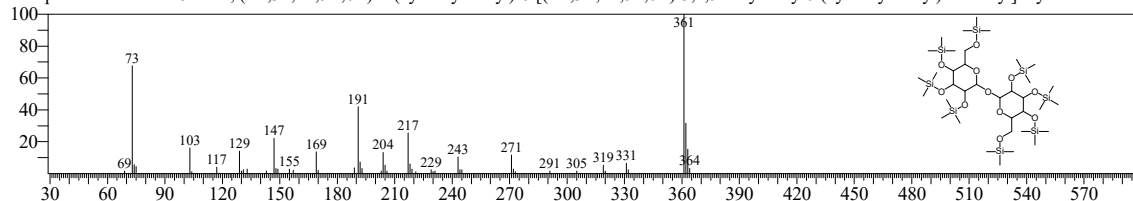

Hit#:2 Entry:560 Library:OA\_TMS\_DB5\_67min\_V3.lib

SI:53 Formula:C37H89NO11Si8 CAS:499-40-1 MolWeight:947 RetIndex:2947

CompName:Isomaltose-meto-8TMS(1) ; (3R,4S,5S,6R)-6-[(2S,3R,4S,5S,6R)-3,4,5-trihydroxy-6-(hydroxymethyl)oxan-2-yl]oxymethyl]oxane-2,3,

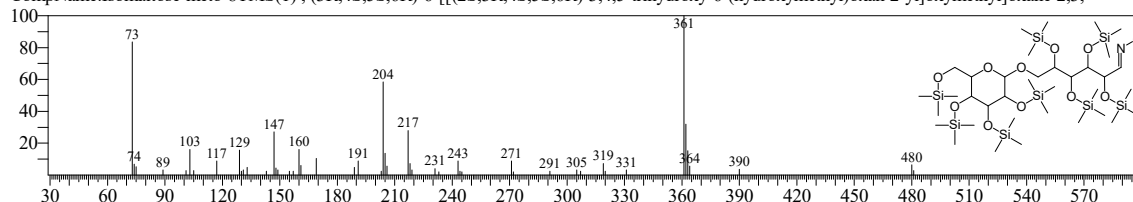

Hit#:3 Entry:559 Library:OA\_TMS\_DB5\_67min\_V3.lib

SI:52 Formula:C39H96O11Si9 CAS:585-88-6 MolWeight:992 RetIndex:2923

CompName:Maltitol-9TMS ; (2S,3R,4R,5R)-4-[(2R,3R,4S,5S,6R)-3,4,5-trihydroxy-6-(hydroxymethyl)oxan-2-yl]oxyhexane-1,2,3,5,6-pentol

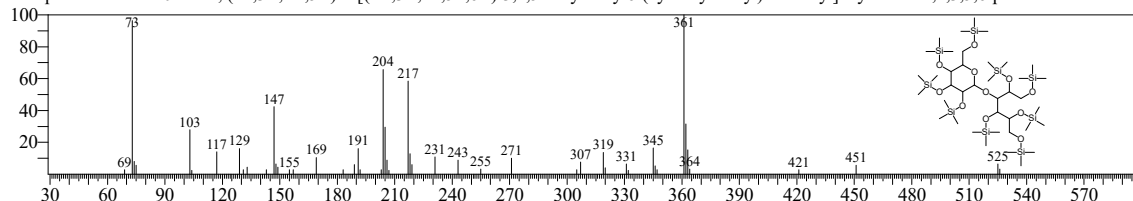

Hit#:4 Entry:541 Library:OA\_TMS\_DB5\_67min\_V3.lib

SI:52 Formula:C36H86O11Si8 CAS:57-50-1 MolWeight:918 RetIndex:2705

CompName:Sucrose-8TMS ; (2R,3R,4S,5S,6R)-2-[(2S,3S,4S,5R)-3,4-dihydroxy-2,5-bis(hydroxymethyl)oxolan-2-yl]oxy-6-(hydroxymethyl)oxane-3



Hit#:5 Entry:555 Library:OA\_TMS\_DB5\_67min\_V3.lib

SI:48 Formula:C39H96O11Si9 CAS:585-86-4 MolWeight:992 RetIndex:2845

CompName:Lactitol-9TMS ; (2S,3R,4R,5R)-4-[(2S,3R,4S,5R,6R)-3,4,5-trihydroxy-6-(hydroxymethyl)oxan-2-yl]oxyhexane-1,2,3,5,6-pentol

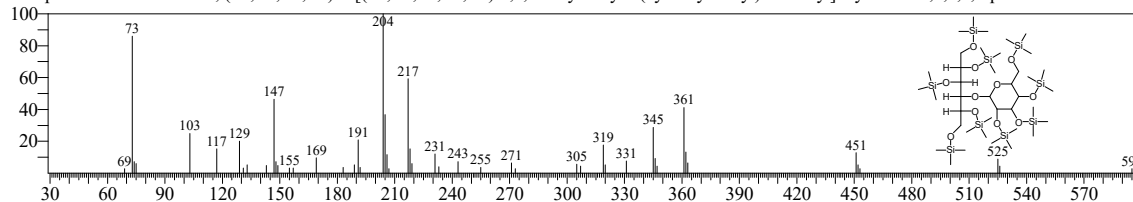



# TNAU

<< Target >>

Line#:31 R.Time:31.220(Scan#:5345) MassPeaks:297

RawMode:Averaged 31.215-31.225(5344-5346) BasePeak:361.20(2171)

BG Mode:Calc. from Peak Group 1 - Event 1 Q3 Scan

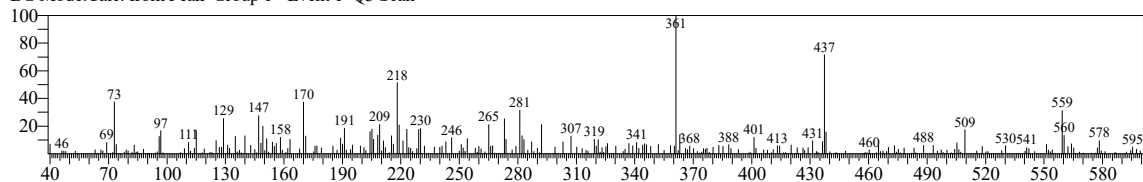

Hit#:1 Entry:541 Library:OA TMS DB5 67min V3.lib

SI:46 Formula:C36H86O11Si8 CAS:57-50-1 MolWeight:918 RetIndex:2705

CompName:Sucrose-8TMS ; (2R,3R,4S,5S,6R)-2-[(2S,3S,4S,5R)-3,4-dihydroxy-2,5-bis(hydroxymethyl)oxolan-2-yl]oxy-6-(hydroxymethyl)oxane-3



Hit#:2 Entry:334 Library:OA TMS DB5 67min V3.lib

SI:44 Formula:C21H52O6Si5 CAS:57-48-7 MolWeight:540 RetIndex:1852

CompName:Fructose-5TMS(3) ; (3S,4R,5R)-1,3,4,5,6-pentahydroxyhexan-2-one

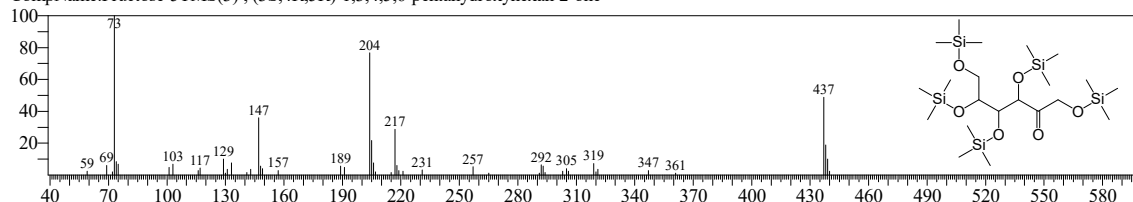

Hit#:3 Entry:552 Library:OA TMS DB5 67min V3.lib

SI:43 Formula:C36H86O11Si8 CAS:99-20-7 MolWeight:918 RetIndex:2812

CompName:Trehalose-8TMS ; (2R,3S,4S,5R,6R)-2-(hydroxymethyl)-6-[(2R,3R,4S,5S,6R)-3,4,5-trihydroxy-6-(hydroxymethyl)oxan-2-yl]oxyoxane-

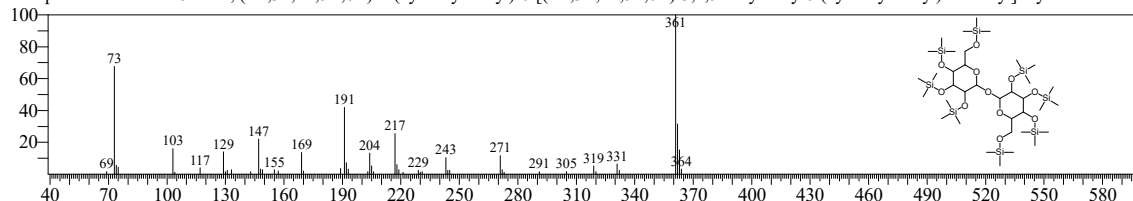

Hit#:4 Entry:360 Library:OA TMS DB5 67min V3.lib

SI:42 Formula:C21H52O6Si5 CAS:3615-56-3 MolWeight:540 RetIndex:1895

CompName:Sorbose-5TMS ; (3R,4S,5R)-1,3,4,5,6-pentahydroxyhexan-2-one

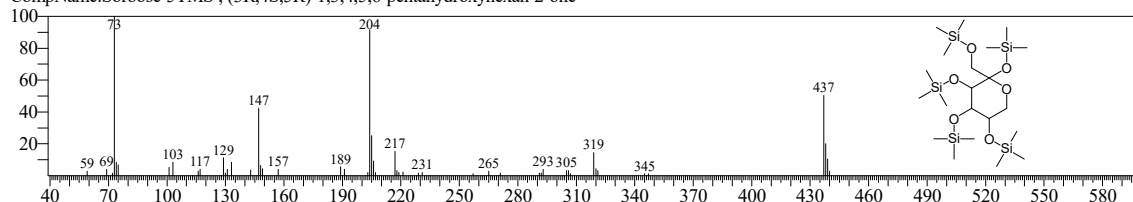

Hit#:5 Entry:561 Library:OA TMS DB5 67min V3.lib

SI:42 Formula:C37H89NO11Si8 CAS:499-40-1 MolWeight:947 RetIndex:2983

CompName:Isomaltose-meto-8TMS(2) ; (3R,4S,5S,6R)-6-[[[(2S,3R,4S,5S,6R)-3,4,5-trihydroxy-6-(hydroxymethyl)oxan-2-yl]oxymethyl]oxane-2,3,

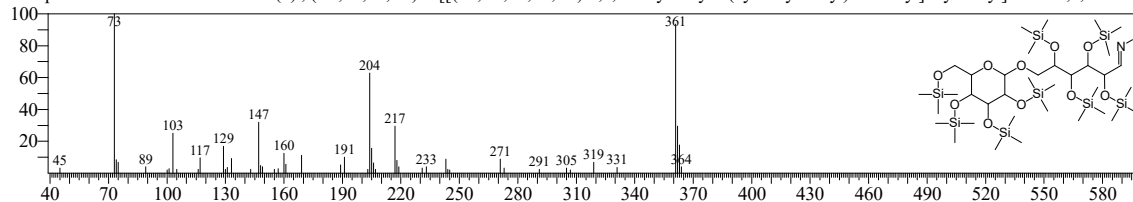

# TNAU

<< Target >>

Line#:32 R.Time:31.255(Scan#:5352) MassPeaks:283

RawMode:Averaged 31.250-31.260(5351-5353) BasePeak:437.25(2203)

BG Mode:Calc. from Peak Group 1 - Event 1 Q3 Scan

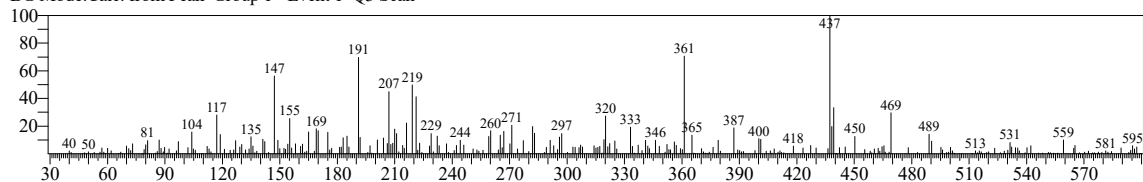

Hit#:1 Entry:334 Library:OA.TMS.DB5\_67min.V3.lib

SI:39 Formula:C<sub>21</sub>H<sub>52</sub>O<sub>6</sub>Si<sub>5</sub> CAS:57-48-7 MolWeight:540 RetIndex:1852

CompName:Fructose-5TMS(3) ; (3S,4R,5R)-1,3,4,5,6-pentahydroxyhexan-2-one

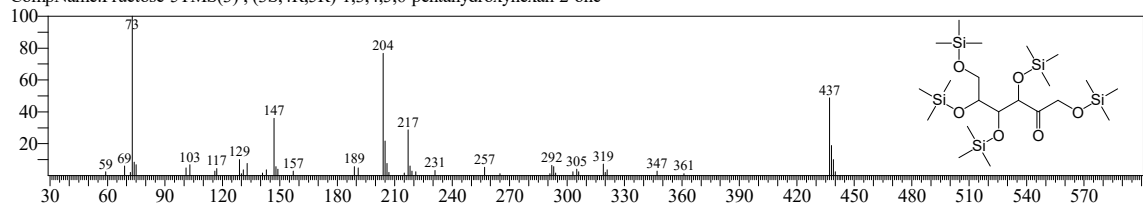

Hit#:2 Entry:541 Library:OA.TMS.DB5\_67min.V3.lib

SI:39 Formula:C<sub>36</sub>H<sub>86</sub>O<sub>11</sub>Si<sub>8</sub> CAS:57-50-1 MolWeight:918 RetIndex:2705

CompName:Sucrose-8TMS ; (2R,3R,4S,5S,6R)-2-[(2S,3S,4S,5R)-3,4-dihydroxy-2,5-bis(hydroxymethyl)oxolan-2-yl]oxy-6-(hydroxymethyl)oxane-3

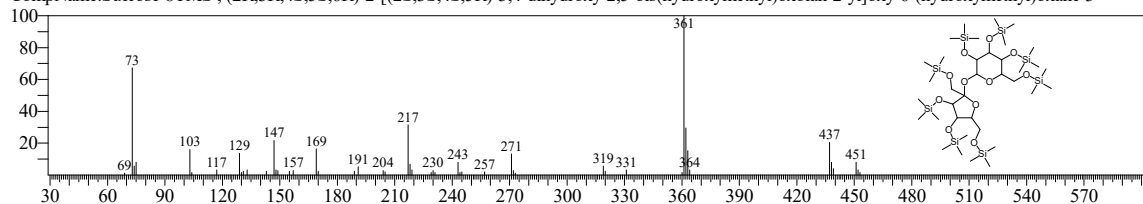

Hit#:3 Entry:320 Library:OA.TMS.DB5\_67min.V3.lib

SI:38 Formula:C<sub>21</sub>H<sub>52</sub>O<sub>6</sub>Si<sub>5</sub> CAS:23140-52-5 MolWeight:540 RetIndex:1837

CompName:Psicose-5TMS(1) ; (3R,4R,5R)-1,3,4,5,6-pentahydroxyhexan-2-one

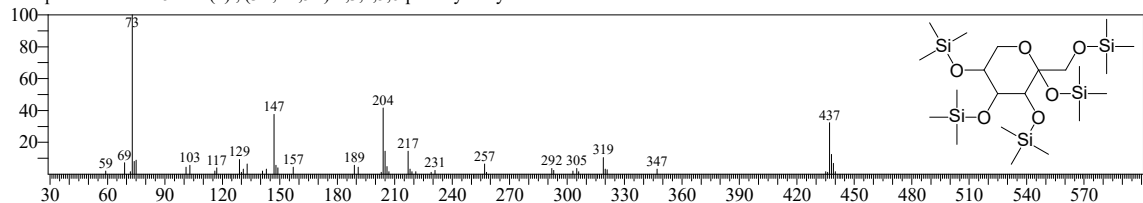

Hit#:4 Entry:360 Library:OA.TMS.DB5\_67min.V3.lib

SI:38 Formula:C<sub>21</sub>H<sub>52</sub>O<sub>6</sub>Si<sub>5</sub> CAS:3615-56-3 MolWeight:540 RetIndex:1895

CompName:Sorbose-5TMS ; (3R,4S,5R)-1,3,4,5,6-pentahydroxyhexan-2-one

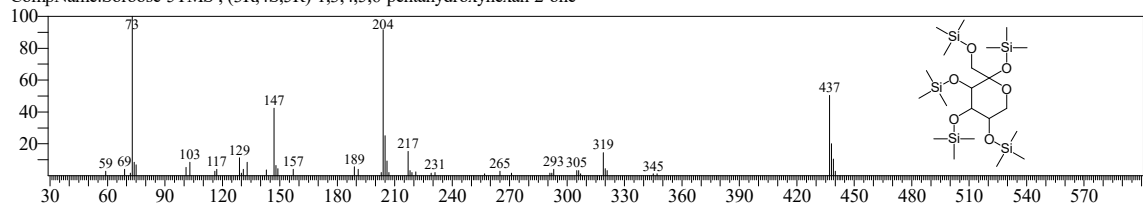

Hit#:5 Entry:364 Library:OA.TMS.DB5\_67min.V3.lib

SI:37 Formula:C<sub>21</sub>H<sub>52</sub>O<sub>6</sub>Si<sub>5</sub> CAS:87-81-0 MolWeight:540 RetIndex:1897

CompName:Tagatose-5TMS(3) ; (3S,4S,5R)-1,3,4,5,6-pentahydroxyhexan-2-one

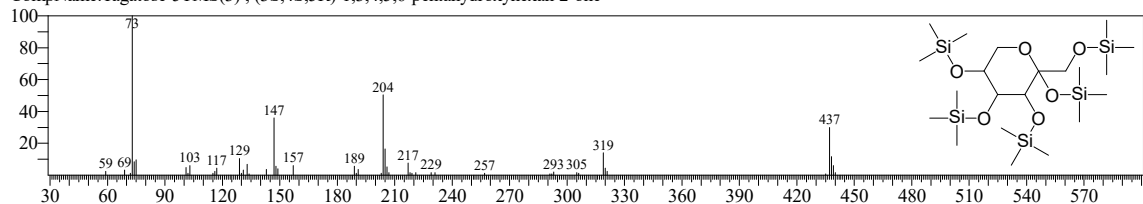

# TNAU

<< Target >>

Line#:33 R.Time:31.390(Scan#:5379) MassPeaks:291

RawMode:Averaged 31.385-31.395(5378-5380) BasePeak:361.20(5930)

BG Mode:Calc. from Peak Group 1 - Event 1 Q3 Scan

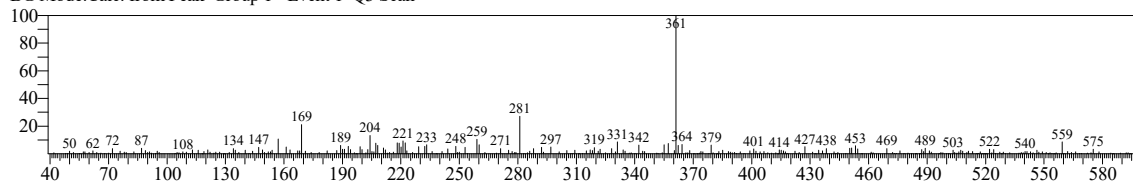

Hit#:1 Entry:541 Library:OA TMS DB5 67min V3.lib

SI:44 Formula:C36H86O11Si8 CAS:57-50-1 MolWeight:918 RetIndex:2705

CompName:Sucrose-8TMS ; (2R,3R,4S,5S,6R)-2-[(2S,3S,4S,5R)-3,4-dihydroxy-2,5-bis(hydroxymethyl)oxolan-2-yl]oxy-6-(hydroxymethyl)oxane-3



Hit#:2 Entry:552 Library:OA TMS DB5 67min V3.lib

SI:44 Formula:C36H86O11Si8 CAS:99-20-7 MolWeight:918 RetIndex:2812

CompName:Trehalose-8TMS ; (2R,3S,4S,5R,6R)-2-(hydroxymethyl)-6-[(2R,3R,4S,5S,6R)-3,4,5-trihydroxy-6-(hydroxymethyl)oxan-2-yl]oxyoxane-



Hit#:3 Entry:560 Library:OA TMS DB5 67min V3.lib

SI:42 Formula:C37H89NO11Si8 CAS:499-40-1 MolWeight:947 RetIndex:2947

CompName:Isomaltose-meto-8TMS(1) ; (3R,4S,5S,6R)-6-[[[(2S,3R,4S,5S,6R)-3,4,5-trihydroxy-6-(hydroxymethyl)oxan-2-yl]oxymethyl]oxane-2,3,

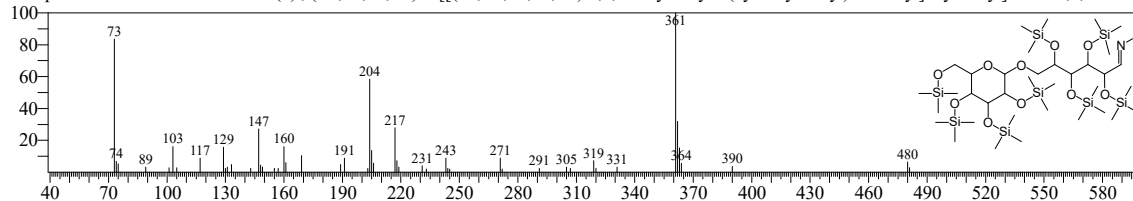

Hit#:4 Entry:559 Library:OA TMS DB5 67min V3.lib

SI:39 Formula:C39H96O11Si9 CAS:585-88-6 MolWeight:992 RetIndex:2923

CompName:Maltitol-9TMS ; (2S,3R,4R,5R)-4-[(2R,3R,4S,5S,6R)-3,4,5-trihydroxy-6-(hydroxymethyl)oxan-2-yl]oxyhexane-1,2,3,5,6-pentol

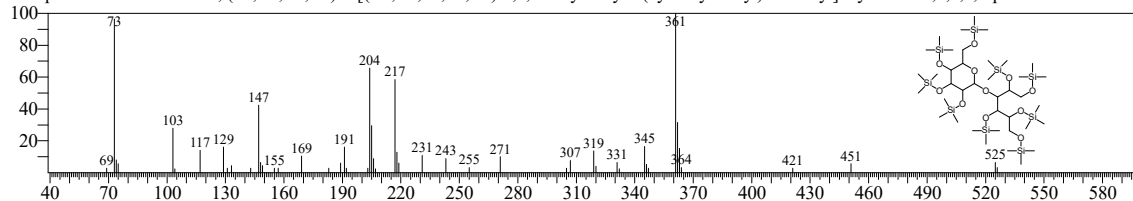

Hit#:5 Entry:555 Library:OA TMS DB5 67min V3.lib

SI:33 Formula:C39H96O11Si9 CAS:585-86-4 MolWeight:992 RetIndex:2845

CompName:Lactitol-9TMS ; (2S,3R,4R,5R)-4-[(2S,3R,4S,5R,6R)-3,4,5-trihydroxy-6-(hydroxymethyl)oxan-2-yl]oxyhexane-1,2,3,5,6-pentol

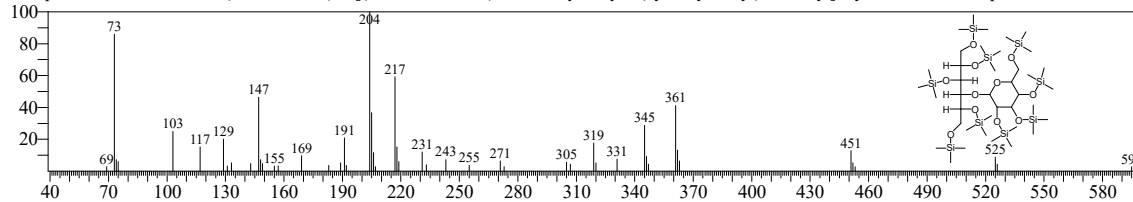

# TNAU

<< Target >>

Line#:34 R.Time:31.415(Scan#:5384) MassPeaks:285

RawMode:Averaged 31.410-31.420(5383-5385) BasePeak:361.20(3553)

BG Mode:Calc. from Peak Group 1 - Event 1 Q3 Scan

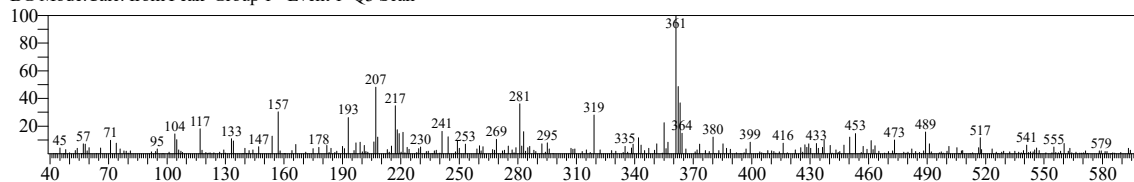

Hit#:1 Entry:541 Library:OA\_TMS\_DB5\_67min\_V3.lib

SI:41 Formula:C36H86O11Si8 CAS:57-50-1 MolWeight:918 RetIndex:2705

CompName:Sucrose-8TMS ; (2R,3R,4S,5S,6R)-2-[(2S,3S,4S,5R)-3,4-dihydroxy-2,5-bis(hydroxymethyl)oxolan-2-yl]oxy-6-(hydroxymethyl)oxane-3

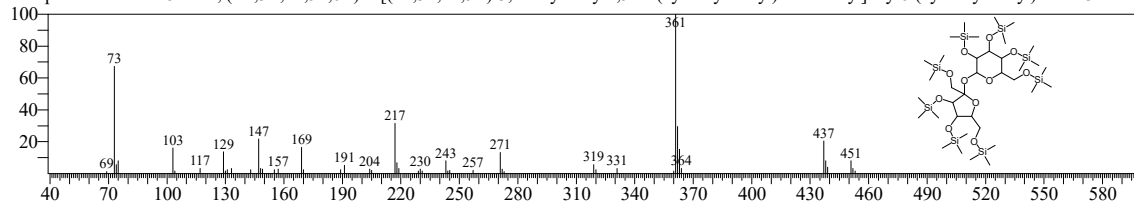

Hit#:2 Entry:552 Library:OA\_TMS\_DB5\_67min\_V3.lib

SI:40 Formula:C36H86O11Si8 CAS:99-20-7 MolWeight:918 RetIndex:2812

CompName:Trehalose-8TMS ; (2R,3S,4S,5R,6R)-2-(hydroxymethyl)-6-[(2R,3R,4S,5S,6R)-3,4,5-trihydroxy-6-(hydroxymethyl)oxan-2-yl]oxyoxane-

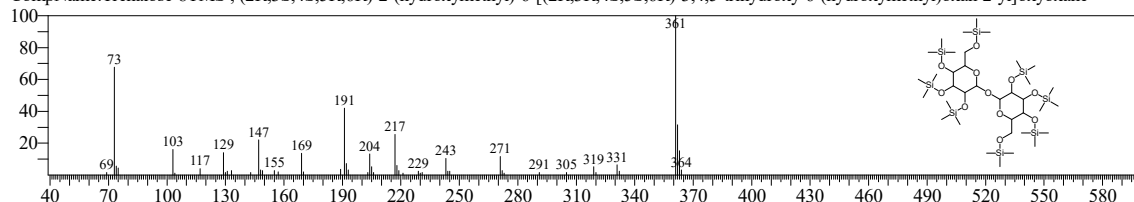

Hit#:3 Entry:559 Library:OA\_TMS\_DB5\_67min\_V3.lib

SI:39 Formula:C39H96O11Si9 CAS:585-88-6 MolWeight:992 RetIndex:2923

CompName:Maltitol-9TMS ; (2S,3R,4R,5R)-4-[(2R,3R,4S,5S,6R)-3,4,5-trihydroxy-6-(hydroxymethyl)oxan-2-yl]oxyhexane-1,2,3,5,6-pentol

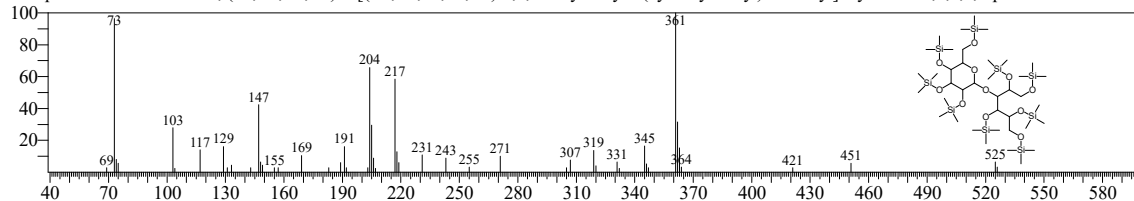

Hit#:4 Entry:560 Library:OA\_TMS\_DB5\_67min\_V3.lib

SI:38 Formula:C37H89NO11Si8 CAS:499-40-1 MolWeight:947 RetIndex:2947

CompName:Isomaltose-meto-8TMS(1) ; (3R,4S,5S,6R)-6-[(2S,3R,4S,5S,6R)-3,4,5-trihydroxy-6-(hydroxymethyl)oxan-2-yl]oxymethyl]oxane-2,3,

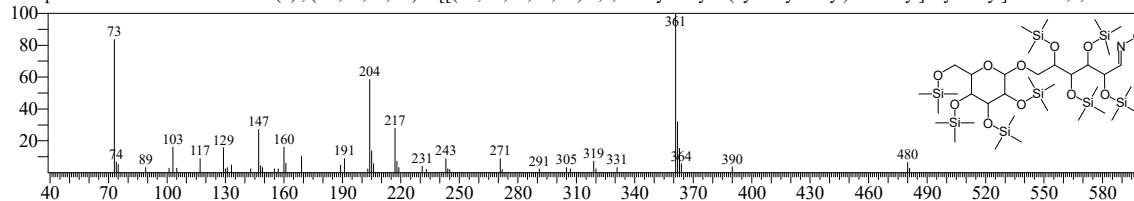

Hit#:5 Entry:326 Library:OA\_TMS\_DB5\_67min\_V3.lib

SI:26 Formula:C21H52O6Si5 CAS:23140-52-5 MolWeight:540 RetIndex:1841

CompName:Psicose-5TMS(2) ; (3R,4R,5R)-1,3,4,5,6-pentahydroxyhexan-2-one

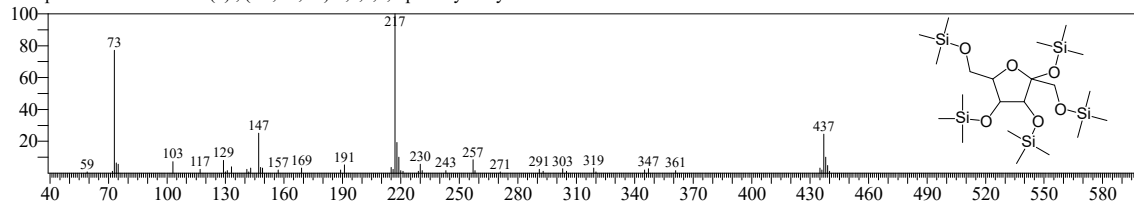

# TNAU

<< Target >>

Line#:35 R.Time:31.495(Scan#:5400) MassPeaks:276

RawMode:Averaged 31.490-31.500(5399-5401) BasePeak:362.15(1580)

BG Mode:Calc. from Peak Group 1 - Event 1 Q3 Scan

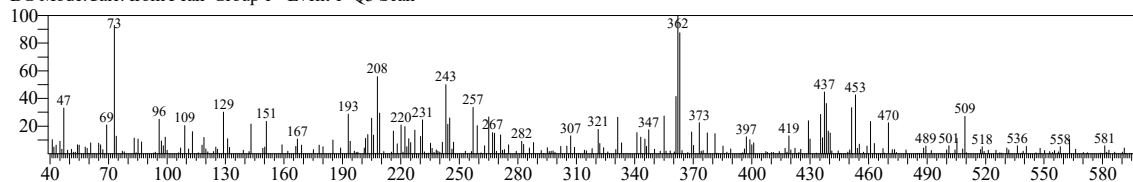

Hit#:1 Entry:541 Library:OA TMS DB5\_67min\_V3.lib

SI:40 Formula:C36H86O11Si8 CAS:57-50-1 MolWeight:918 RetIndex:2705

CompName:Sucrose-8TMS ; (2R,3R,4S,5S,6R)-2-[(2S,3S,4S,5R)-3,4-dihydroxy-2,5-bis(hydroxymethyl)oxolan-2-yl]oxy-6-(hydroxymethyl)oxane-3

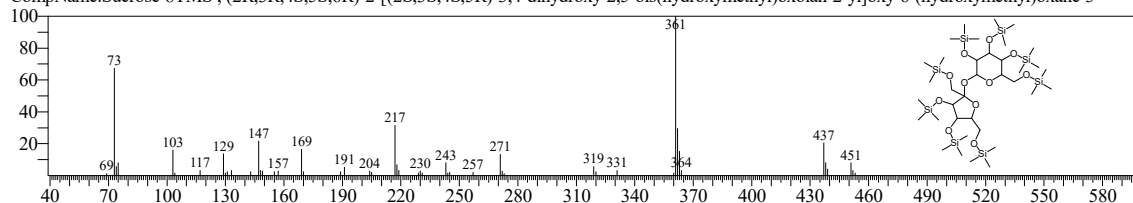

Hit#:2 Entry:553 Library:OA TMS DB5\_67min\_V3.lib

SI:35 Formula:C37H89NO11Si8 CAS:69-79-4 MolWeight:947 RetIndex:2817

CompName:Maltose-meto-8TMS(1) ; (2R,3S,4S,5R,6R)-2-(hydroxymethyl)-6-[(2R,3S,4R,5R,6R)-4,5,6-trihydroxy-2-(hydroxymethyl)oxan-3-yl]oxy

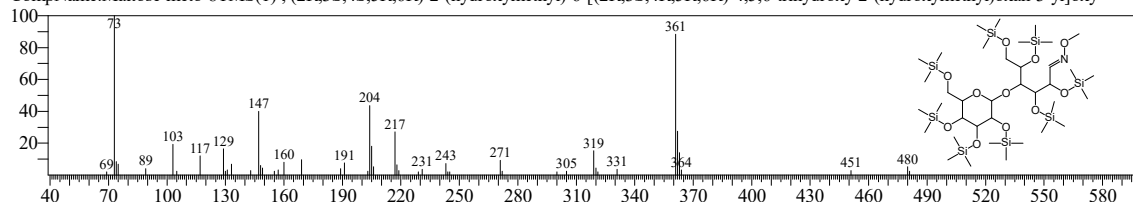

Hit#:3 Entry:552 Library:OA TMS DB5\_67min\_V3.lib

SI:33 Formula:C36H86O11Si8 CAS:99-20-7 MolWeight:918 RetIndex:2812

CompName:Trehalose-8TMS ; (2R,3S,4S,5R,6R)-2-(hydroxymethyl)-6-[(2R,3R,4S,5S,6R)-3,4,5-trihydroxy-6-(hydroxymethyl)oxan-2-yl]oxyoxane-



Hit#:4 Entry:559 Library:OA TMS DB5\_67min\_V3.lib

SI:33 Formula:C39H96O11Si9 CAS:585-88-6 MolWeight:992 RetIndex:2923

CompName:Maltitol-9TMS ; (2S,3R,4R,5R)-4-[(2R,3R,4S,5S,6R)-3,4,5-trihydroxy-6-(hydroxymethyl)oxan-2-yl]oxyhexane-1,2,3,5,6-pentol



Hit#:5 Entry:545 Library:OA TMS DB5\_67min\_V3.lib

SI:33 Formula:C37H89NO11Si8 CAS:63-42-3 MolWeight:947 RetIndex:2760

CompName:Lactose-meto-8TMS(1) ; (2R,3R,4S,5R,6S)-2-(hydroxymethyl)-6-[(2R,3S,4R,5R,6R)-4,5,6-trihydroxy-2-(hydroxymethyl)oxan-3-yl]oxy

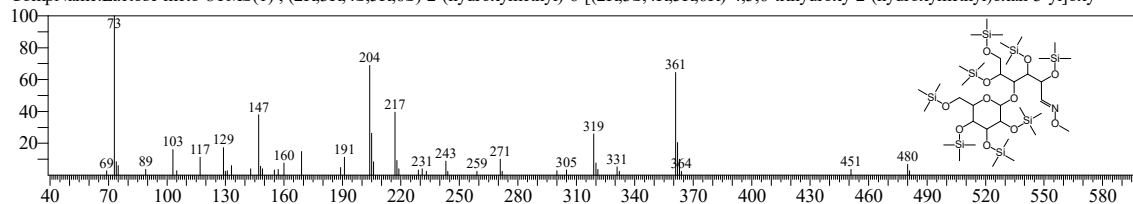

<< Target >>

Line#:36 R.Time:31.525(Scan#:5406) MassPeaks:290

RawMode:Averaged 31.520-31.530(5405-5407) BasePeak:361.20(6305)

BG Mode:Calc. from Peak Group 1 - Event 1 Q3 Scan

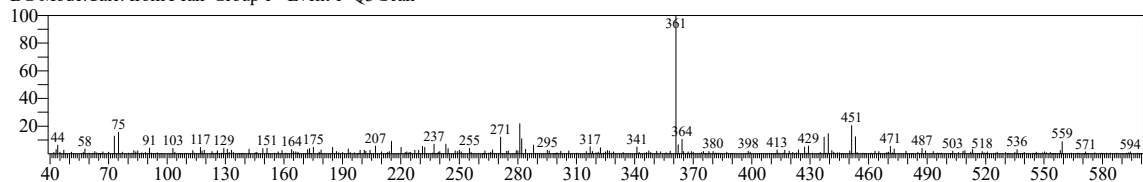

Hit#:1 Entry:541 Library:OA TMS DB5 67min V3.lib

SI:53 Formula:C36H86O11Si8 CAS:57-50-1 MolWeight:918 RetIndex:2705

CompName:Sucrose-8TMS ; (2R,3R,4S,5S,6R)-2-[(2S,3S,4S,5R)-3,4-dihydroxy-2,5-bis(hydroxymethyl)oxolan-2-yl]oxy-6-(hydroxymethyl)oxane-3

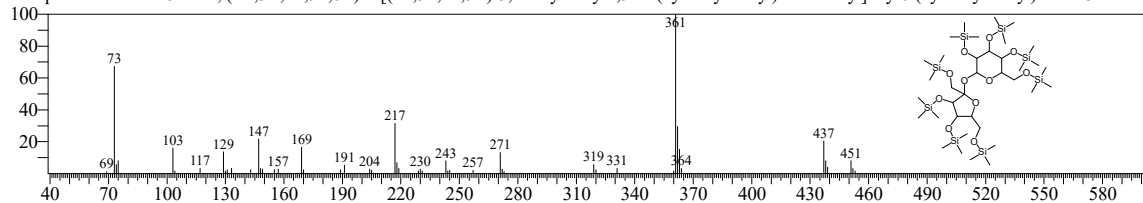

Hit#:2 Entry:552 Library:OA TMS DB5 67min V3.lib

SI:44 Formula:C36H86O11Si8 CAS:99-20-7 MolWeight:918 RetIndex:2812

CompName:Trehalose-8TMS ; (2R,3S,4S,5R,6R)-2-(hydroxymethyl)-6-[(2R,3R,4S,5S,6R)-3,4,5-trihydroxy-6-(hydroxymethyl)oxan-2-yl]oxyoxane-

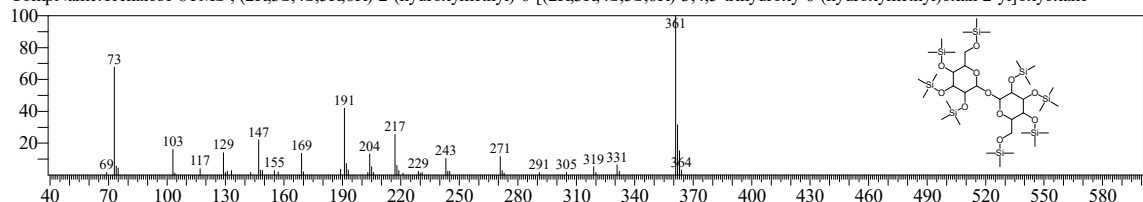

Hit#:3 Entry:553 Library:OA TMS DB5 67min V3.lib

SI:42 Formula:C37H89NO11Si8 CAS:69-79-4 MolWeight:947 RetIndex:2817

CompName:Maltose-meto-8TMS(1) ; (2R,3S,4S,5R,6R)-2-(hydroxymethyl)-6-[(2R,3S,4R,5R,6R)-4,5,6-trihydroxy-2-(hydroxymethyl)oxan-3-yl]oxy

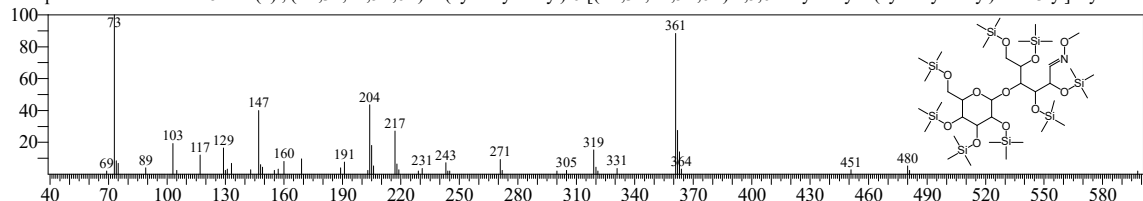

Hit#:4 Entry:560 Library:OA TMS DB5 67min V3.lib

SI:42 Formula:C37H89NO11Si8 CAS:499-40-1 MolWeight:947 RetIndex:2947

CompName:Isomaltose-meto-8TMS(1) ; (3R,4S,5S,6R)-6-[(2S,3R,4S,5S,6R)-3,4,5-trihydroxy-6-(hydroxymethyl)oxan-2-yl]oxymethyl]oxane-2,3,

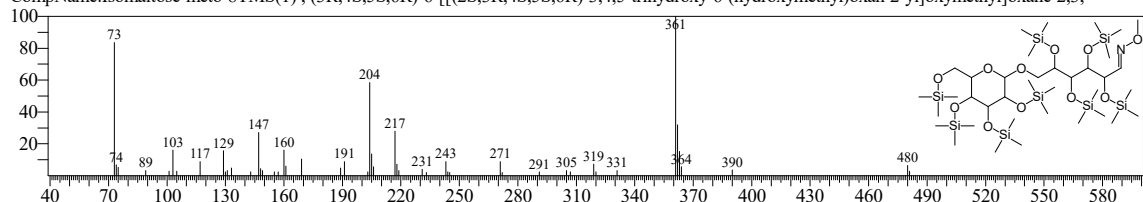

Hit#:5 Entry:559 Library:OA TMS DB5 67min V3.lib

SI:40 Formula:C39H96O11Si9 CAS:585-88-6 MolWeight:992 RetIndex:2923

CompName:Maltitol-9TMS ; (2S,3R,4R,5R)-4-[(2R,3R,4S,5S,6R)-3,4,5-trihydroxy-6-(hydroxymethyl)oxan-2-yl]oxyhexane-1,2,3,5,6-pentol

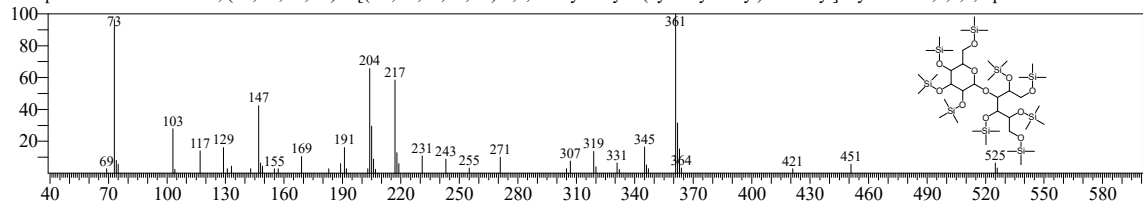

# TNAU

<< Target >>

Line#:37 R.Time:31.560(Scan#:5413) MassPeaks:291

RawMode:Averaged 31.555-31.565(5412-5414) BasePeak:73.05(2446)

BG Mode:Calc. from Peak Group 1 - Event 1 Q3 Scan

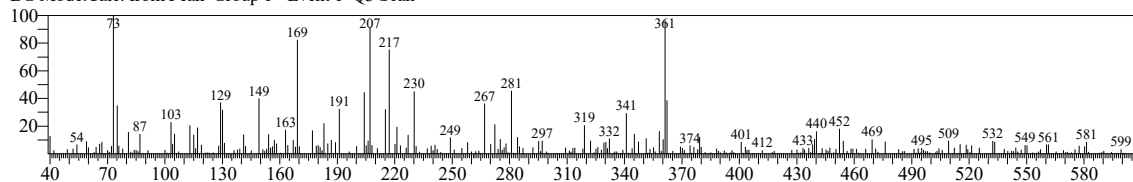

Hit#:1 Entry:559 Library:OA\_TMS\_DB5\_67min\_V3.lib

SI:52 Formula:C39H96O11Si9 CAS:585-88-6 MolWeight:992 RetIndex:2923

CompName:Maltitol-9TMS ; (2S,3R,4R,5R)-4-[(2R,3R,4S,5S,6R)-3,4,5-trihydroxy-6-(hydroxymethyl)oxan-2-yl]oxyhexane-1,2,3,5,6-pentol



Hit#:2 Entry:561 Library:OA\_TMS\_DB5\_67min\_V3.lib

SI:50 Formula:C37H89NO11Si8 CAS:499-40-1 MolWeight:947 RetIndex:2983

CompName:Isomaltose-meto-8TMS(2) ; (3R,4S,5S,6R)-6-[[2S,3R,4S,5S,6R)-3,4,5-trihydroxy-6-(hydroxymethyl)oxan-2-yl]oxymethyl]oxane-2,3,



Hit#:3 Entry:556 Library:OA\_TMS\_DB5\_67min\_V3.lib

SI:49 Formula:C37H89NO11Si8 CAS:69-79-4 MolWeight:947 RetIndex:2846

CompName:Maltose-meto-8TMS(2) ; (2R,3S,4S,5R,6R)-2-(hydroxymethyl)-6-[(2R,3S,4R,5R,6R)-4,5,6-trihydroxy-2-(hydroxymethyl)oxan-3-yl]oxy

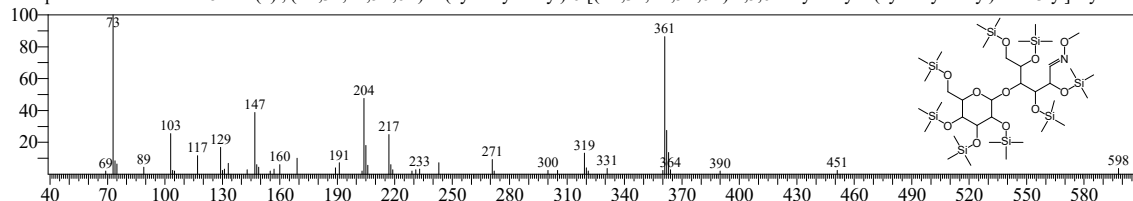

Hit#:4 Entry:552 Library:OA\_TMS\_DB5\_67min\_V3.lib

SI:49 Formula:C36H86O11Si8 CAS:99-20-7 MolWeight:918 RetIndex:2812

CompName:Trehalose-8TMS ; (2R,3S,4S,5R,6R)-2-(hydroxymethyl)-6-[(2R,3R,4S,5S,6R)-3,4,5-trihydroxy-6-(hydroxymethyl)oxan-2-yl]oxyoxane-



Hit#:5 Entry:555 Library:OA\_TMS\_DB5\_67min\_V3.lib

SI:49 Formula:C39H96O11Si9 CAS:585-86-4 MolWeight:992 RetIndex:2845

CompName:Lactitol-9TMS ; (2S,3R,4R,5R)-4-[(2S,3R,4S,5R,6R)-3,4,5-trihydroxy-6-(hydroxymethyl)oxan-2-yl]oxyhexane-1,2,3,5,6-pentol

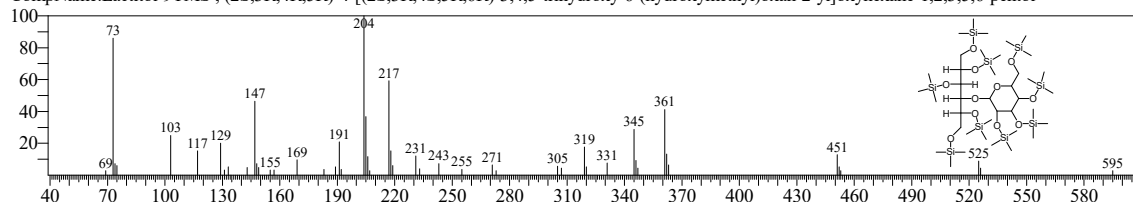

# TNAU

<< Target >>

Line#:38 R.Time:31.595(Scan#:5420) MassPeaks:277

RawMode:Averaged 31.590-31.600(5419-5421) BasePeak:217.10(3091)

BG Mode:Calc. from Peak Group 1 - Event 1 Q3 Scan

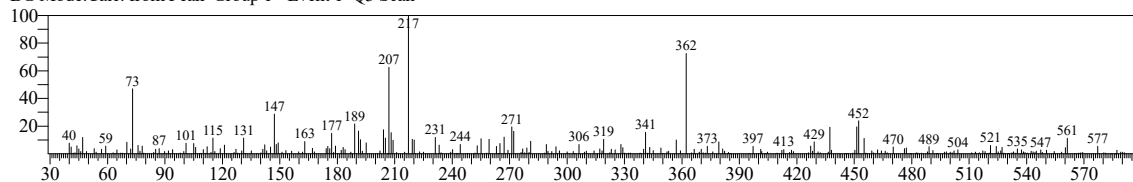

Hit#:1 Entry:210 Library:OA\_TMS\_DB5\_67min\_V3.lib

SI:50 Formula:C17H42O5Si4 CAS:10323-20-3 MolWeight:438 RetIndex:1634

CompName:Arabinose-4TMS(1); (2S,3R,4R)-2,3,4,5-tetrahydropentanal

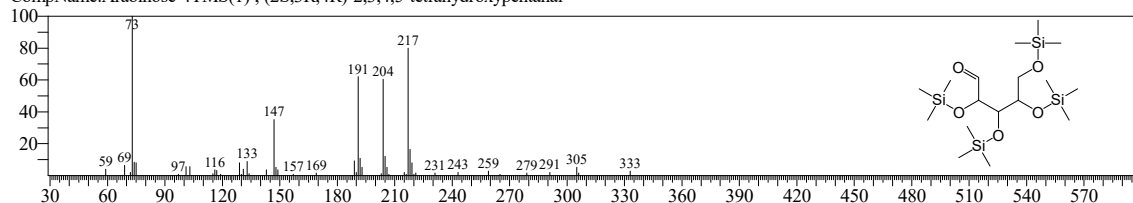

Hit#:2 Entry:236 Library:OA\_TMS\_DB5\_67min\_V3.lib

SI:50 Formula:C17H42O5Si4 CAS:50-69-1 MolWeight:438 RetIndex:1673

CompName:Ribose-4TMS(3); (3R,4S,5R)-5-(hydroxymethyl)oxolane-2,3,4-triol

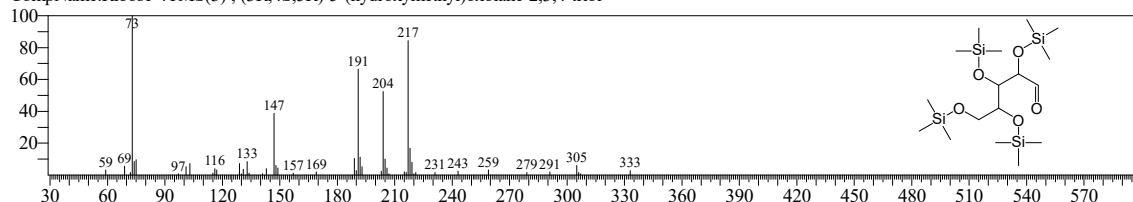

Hit#:3 Entry:555 Library:OA\_TMS\_DB5\_67min\_V3.lib

SI:49 Formula:C39H96O11Si9 CAS:585-86-4 MolWeight:992 RetIndex:2845

CompName:Lactitol-9TMS; (2S,3R,4R,5R)-4-[(2S,3R,4S,5R,6R)-3,4,5-trihydroxy-6-(hydroxymethyl)oxan-2-yl]oxyhexane-1,2,3,5,6-pentol

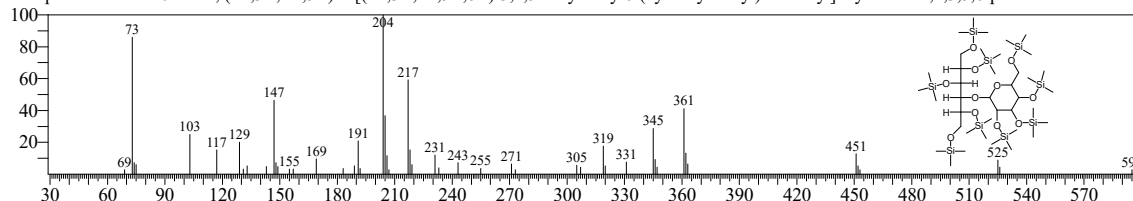

Hit#:4 Entry:351 Library:OA\_TMS\_DB5\_67min\_V3.lib

SI:48 Formula:C18H44O5Si4 CAS:154-58-5 MolWeight:452 RetIndex:1876

CompName:1,5-Anhydro-glucitol-4TMS; (2R,3S,4R,5S)-2-(hydroxymethyl)oxane-3,4,5-triol

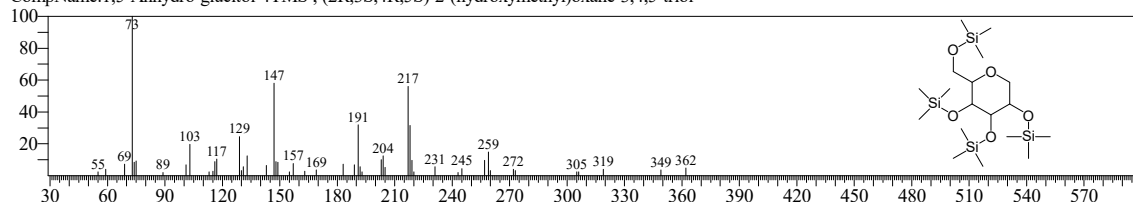

Hit#:5 Entry:205 Library:OA\_TMS\_DB5\_67min\_V3.lib

SI:47 Formula:C17H42O5Si4 CAS:1114-34-7 MolWeight:438 RetIndex:1624

CompName:Lyxose-4TMS(1); (2S,3S,4R)-2,3,4,5-tetrahydropentanal

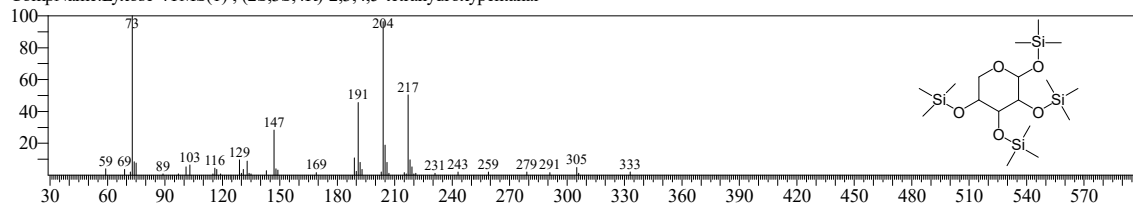



&lt;&lt; Target &gt;&gt;

Line#:39 R.Time:31.625(Scan#:5426) MassPeaks:269

RawMode:Averaged 31.620-31.630(5425-5427) BasePeak:75.05(839)

BG Mode:Calc. from Peak Group 1 - Event 1 Q3 Scan

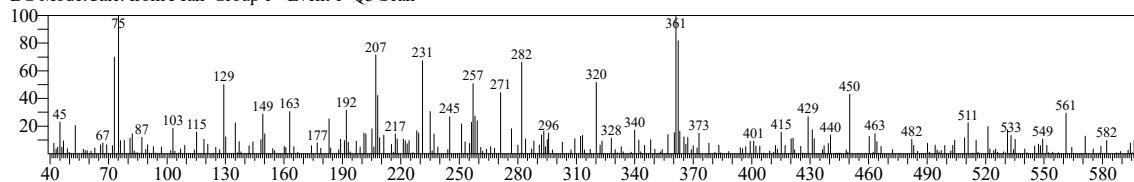

Hit#:1 Entry:541 Library:OA TMS DB5\_67min\_V3.lib

SI:39 Formula:C36H86O11Si8 CAS:57-50-1 MolWeight:918 RetIndex:2705

CompName:Sucrose-8TMS ; (2R,3R,4S,5S,6R)-2-[(2S,3S,4S,5R)-3,4-dihydroxy-2,5-bis(hydroxymethyl)oxolan-2-yl]oxy-6-(hydroxymethyl)oxane-3



Hit#:2 Entry:559 Library:OA TMS DB5\_67min\_V3.lib

SI:38 Formula:C39H96O11Si9 CAS:585-88-6 MolWeight:992 RetIndex:2923

CompName:Maltitol-9TMS ; (2S,3R,4R,5R)-4-[(2R,3R,4S,5S,6R)-3,4,5-trihydroxy-6-(hydroxymethyl)oxan-2-yl]oxyhexane-1,2,3,5,6-pentol

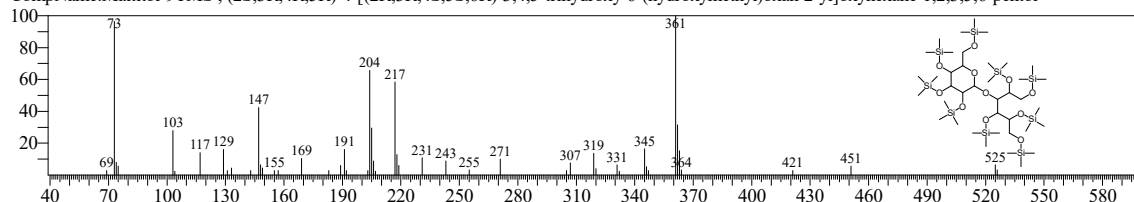

Hit#:3 Entry:552 Library:OA TMS DB5\_67min\_V3.lib

SI:38 Formula:C36H86O11Si8 CAS:99-20-7 MolWeight:918 RetIndex:2812

CompName:Trehalose-8TMS ; (2R,3S,4S,5R,6R)-2-(hydroxymethyl)-6-[(2R,3R,4S,5S,6R)-3,4,5-trihydroxy-6-(hydroxymethyl)oxan-2-yl]oxyoxane-



Hit#:4 Entry:561 Library:OA TMS DB5\_67min\_V3.lib

SI:37 Formula:C37H89NO11Si8 CAS:499-40-1 MolWeight:947 RetIndex:2983

CompName:Isomaltose-meto-8TMS(2) ; (3R,4S,5S,6R)-6-[(2S,3R,4S,5S,6R)-3,4,5-trihydroxy-6-(hydroxymethyl)oxan-2-yl]oxymethyl]oxane-2,3,

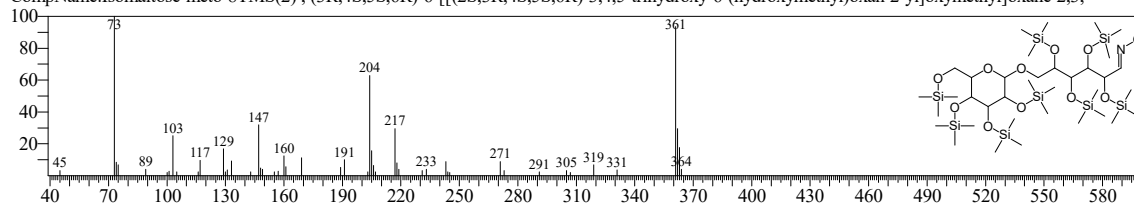

Hit#:5 Entry:553 Library:OA TMS DB5\_67min\_V3.lib

SI:36 Formula:C37H89NO11Si8 CAS:69-79-4 MolWeight:947 RetIndex:2817

CompName:Maltose-meto-8TMS(1) ; (2R,3S,4S,5R,6R)-2-(hydroxymethyl)-6-[(2R,3S,4R,5R,6R)-4,5,6-trihydroxy-2-(hydroxymethyl)oxan-3-yl]oxy

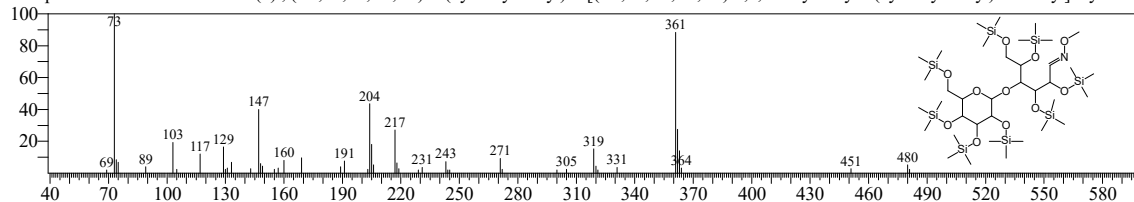

# TNAU

<< Target >>

Line#:40 R.Time:31.670(Scan#:5435) MassPeaks:299

RawMode:Averaged 31.665-31.675(5434-5436) BasePeak:217.10(1619)

BG Mode:Calc. from Peak Group 1 - Event 1 Q3 Scan

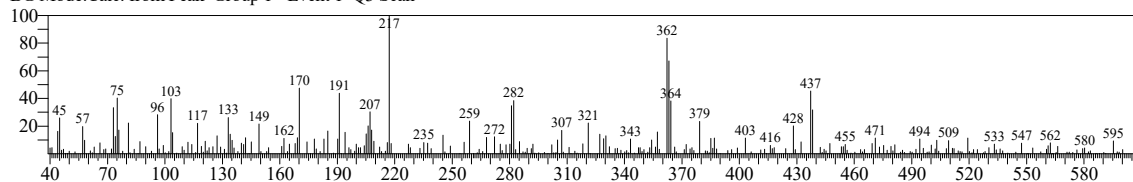

Hit#:1 Entry:561 Library:OA.TMS.DB5\_67min\_V3.lib

SI:37 Formula:C37H89NO11Si8 CAS:499-40-1 MolWeight:947 RetIndex:2983

CompName:Isomaltose-meto-8TMS(2); (3R,4S,5S,6R)-6-[[[(2S,3R,4S,5S,6R)-3,4,5-trihydroxy-6-(hydroxymethyl)oxan-2-yl]oxymethyl]oxane-2,3,

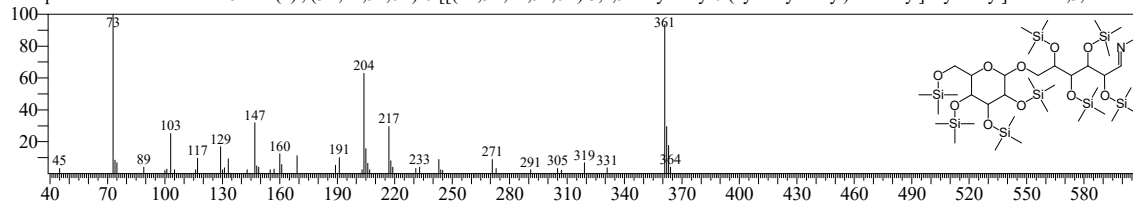

Hit#:2 Entry:523 Library:OA.TMS.DB5\_67min\_V3.lib

SI:37 Formula:C18H36N2O6Si3 CAS:58-96-8 MolWeight:460 RetIndex:2483

CompName:Uridine-3TMS; 1-[(2R,3R,4S,5R)-3,4-dihydroxy-5-(hydroxymethyl)oxolan-2-yl]pyrimidine-2,4-dione

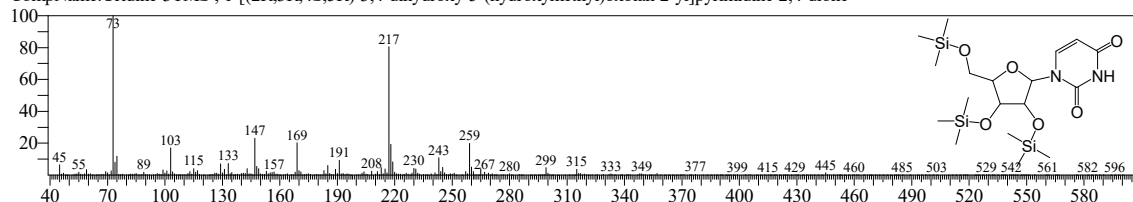

Hit#:3 Entry:519 Library:OA.TMS.DB5\_67min\_V3.lib

SI:37 Formula:C18H36N2O5Si3 CAS:951-78-0 MolWeight:444 RetIndex:2465

CompName:2'-Deoxyuridine-3TMS; 1-[(2R,4S,5R)-4-hydroxy-5-(hydroxymethyl)oxolan-2-yl]pyrimidine-2,4-dione

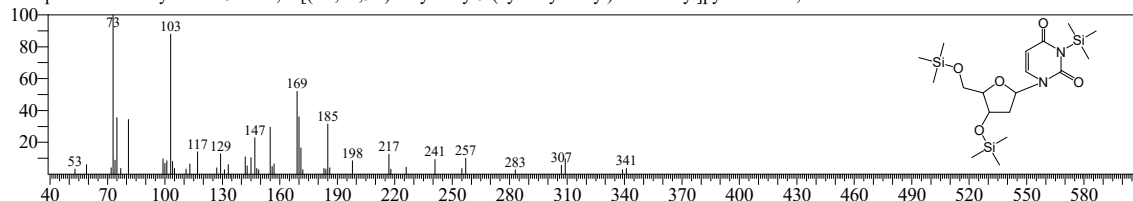

Hit#:4 Entry:425 Library:OA.TMS.DB5\_67min\_V3.lib

SI:36 Formula:C24H62O6Si6 CAS:608-66-2 MolWeight:614 RetIndex:1978

CompName:Galactitol-6TMS; (2R,3S,4R,5S)-hexane-1,2,3,4,5,6-hexol

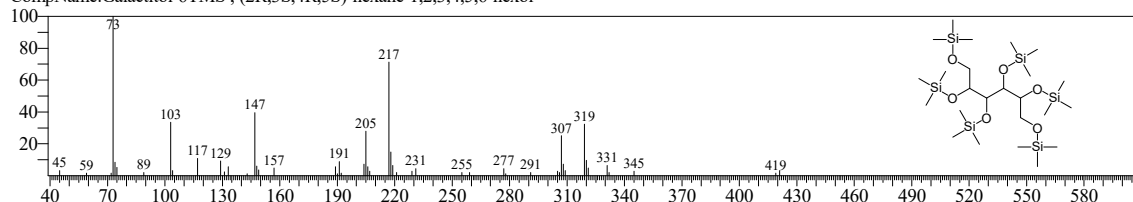

Hit#:5 Entry:155 Library:OA.TMS.DB5\_67min\_V3.lib

SI:36 Formula:C16H42O4Si4 CAS:149-32-6 MolWeight:410 RetIndex:1521

CompName:meso-Erythritol-4TMS; (2S,3R)-butane-1,2,3,4-tetrol

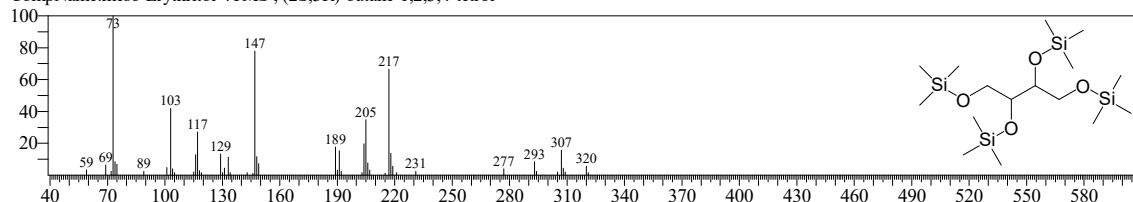

# TNAU

<< Target >>

Line#:41 R.Time:31.710(Scan#:5443) MassPeaks:278

RawMode:Averaged 31.705-31.715(5442-5444) BasePeak:361.20(3321)

BG Mode:Calc. from Peak Group 1 - Event 1 Q3 Scan

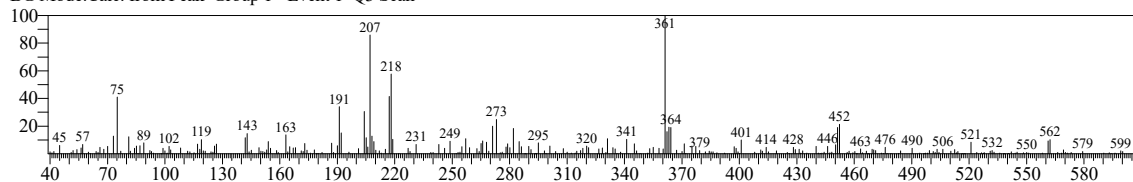

Hit#:1 Entry:559 Library:OA\_TMS\_DB5\_67min\_V3.lib

SI:55 Formula:C39H96O11Si9 CAS:585-88-6 MolWeight:992 RetIndex:2923

CompName:Maltitol-9TMS ; (2S,3R,4R,5R)-4-[(2R,3R,4S,5S,6R)-3,4,5-trihydroxy-6-(hydroxymethyl)oxan-2-yl]oxyhexane-1,2,3,5,6-pentol



Hit#:2 Entry:561 Library:OA\_TMS\_DB5\_67min\_V3.lib

SI:53 Formula:C37H89NO11Si8 CAS:499-40-1 MolWeight:947 RetIndex:2983

CompName:Isomaltose-meto-8TMS(2) ; (3R,4S,5S,6R)-6-[(2S,3R,4S,5S,6R)-3,4,5-trihydroxy-6-(hydroxymethyl)oxan-2-yl]oxymethyl]oxane-2,3,



Hit#:3 Entry:555 Library:OA\_TMS\_DB5\_67min\_V3.lib

SI:52 Formula:C39H96O11Si9 CAS:585-86-4 MolWeight:992 RetIndex:2845

CompName:Lactitol-9TMS ; (2S,3R,4R,5R)-4-[(2S,3R,4S,5R,6R)-3,4,5-trihydroxy-6-(hydroxymethyl)oxan-2-yl]oxyhexane-1,2,3,5,6-pentol

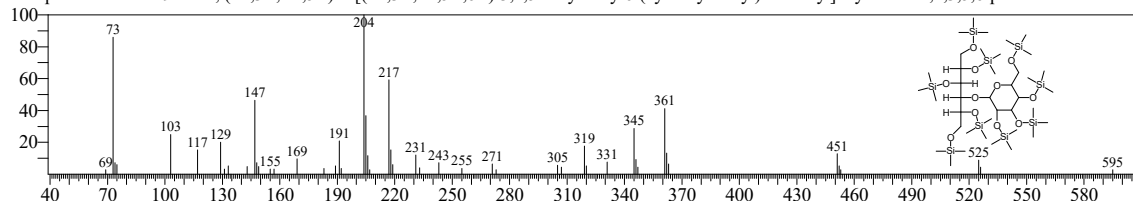

Hit#:4 Entry:552 Library:OA\_TMS\_DB5\_67min\_V3.lib

SI:52 Formula:C36H86O11Si8 CAS:99-20-7 MolWeight:918 RetIndex:2812

CompName:Trehalose-8TMS ; (2R,3S,4S,5R,6R)-2-(hydroxymethyl)-6-[(2R,3R,4S,5S,6R)-3,4,5-trihydroxy-6-(hydroxymethyl)oxan-2-yl]oxyoxane-



Hit#:5 Entry:541 Library:OA\_TMS\_DB5\_67min\_V3.lib

SI:50 Formula:C36H86O11Si8 CAS:57-50-1 MolWeight:918 RetIndex:2705

CompName:Sucrose-8TMS ; (2R,3R,4S,5S,6R)-2-[(2S,3S,4S,5R)-3,4-dihydroxy-2,5-bis(hydroxymethyl)oxolan-2-yl]oxy-6-(hydroxymethyl)oxane-3

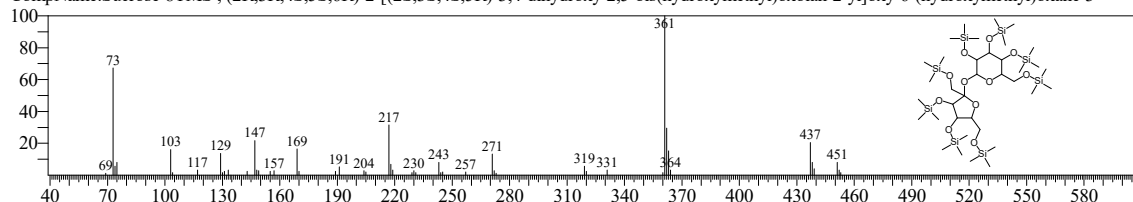

<< Target >>

Line#:42 R.Time:31.795(Scan#:5460) MassPeaks:313

RawMode:Averaged 31.790-31.800(5459-5461) BasePeak:217.10(3329)

BG Mode:Calc. from Peak Group 1 - Event 1 Q3 Scan

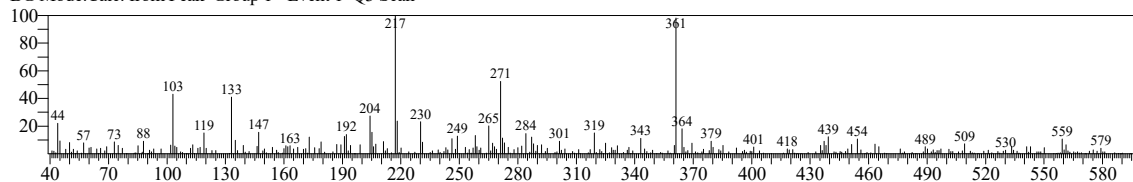

Hit#:1 Entry:559 Library:OA TMS DB5 67min V3.lib

SI:52 Formula:C39H96O11Si9 CAS:585-88-6 MolWeight:992 RetIndex:2923

CompName:Maltitol-9TMS ; (2S,3R,4R,5R)-4-[(2R,3R,4S,5S,6R)-3,4,5-trihydroxy-6-(hydroxymethyl)oxan-2-yl]oxyhexane-1,2,3,5,6-pentol



Hit#:2 Entry:541 Library:OA TMS DB5 67min V3.lib

SI:50 Formula:C36H86O11Si8 CAS:57-50-1 MolWeight:918 RetIndex:2705

CompName:Sucrose-8TMS ; (2R,3R,4S,5S,6R)-2-[(2S,3S,4S,5R)-3,4-dihydroxy-2,5-bis(hydroxymethyl)oxolan-2-yl]oxy-6-(hydroxymethyl)oxane-3

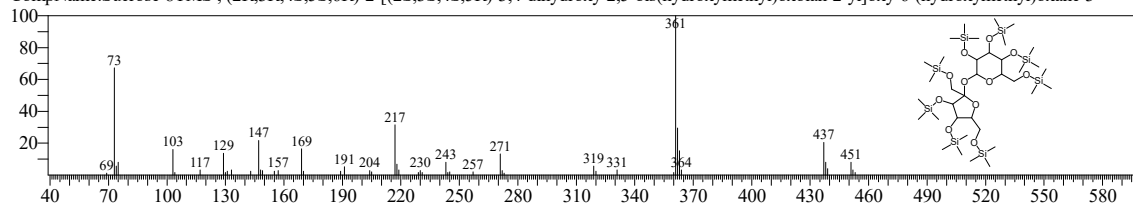

Hit#:3 Entry:552 Library:OA TMS DB5 67min V3.lib

SI:50 Formula:C36H86O11Si8 CAS:99-20-7 MolWeight:918 RetIndex:2812

CompName:Trehalose-8TMS ; (2R,3S,4S,5R,6R)-2-(hydroxymethyl)-6-[(2R,3R,4S,5S,6R)-3,4,5-trihydroxy-6-(hydroxymethyl)oxan-2-yl]oxyoxane-

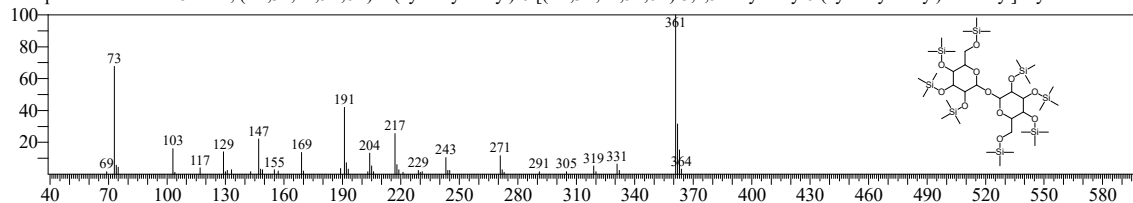

Hit#:4 Entry:561 Library:OA TMS DB5 67min V3.lib

SI:50 Formula:C37H89NO11Si8 CAS:499-40-1 MolWeight:947 RetIndex:2983

CompName:Isomaltose-meto-8TMS(2) ; (3R,4S,5S,6R)-6-[(2S,3R,4S,5S,6R)-3,4,5-trihydroxy-6-(hydroxymethyl)oxan-2-yl]oxymethyl]oxane-2,3,

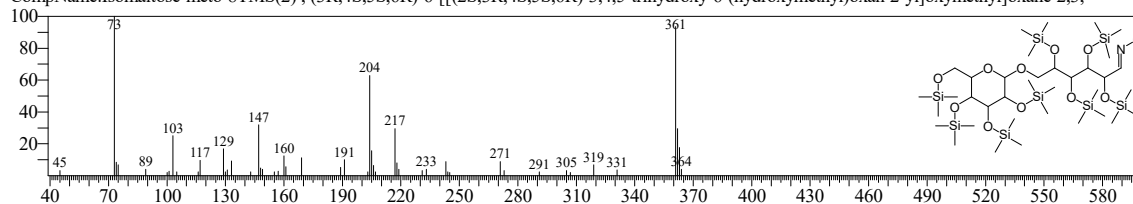

Hit#:5 Entry:553 Library:OA TMS DB5 67min V3.lib

SI:49 Formula:C37H89NO11Si8 CAS:69-79-4 MolWeight:947 RetIndex:2817

CompName:Maltose-meto-8TMS(1) ; (2R,3S,4S,5R,6R)-2-(hydroxymethyl)-6-[(2R,3S,4R,5R,6R)-4,5,6-trihydroxy-2-(hydroxymethyl)oxan-3-yl]oxy



# TNAU

<< Target >>

Line#:43 R.Time:31.840(Scan#:5469) MassPeaks:297

RawMode:Averaged 31.835-31.845(5468-5470) BasePeak:73.05(1977)

BG Mode:Calc. from Peak Group 1 - Event 1 Q3 Scan

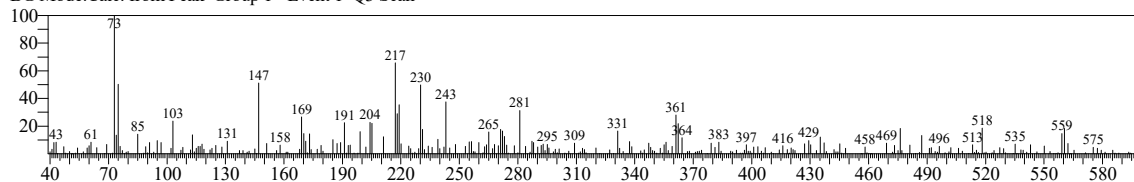

Hit#:1 Entry:559 Library:OA TMS DB5\_67min\_V3.lib

SI:57 Formula:C39H96O11Si9 CAS:585-88-6 MolWeight:992 RetIndex:2923

CompName:Maltitol-9TMS ; (2S,3R,4R,5R)-4-[(2R,3R,4S,5S,6R)-3,4,5-trihydroxy-6-(hydroxymethyl)oxan-2-yl]oxyhexane-1,2,3,5,6-pentol

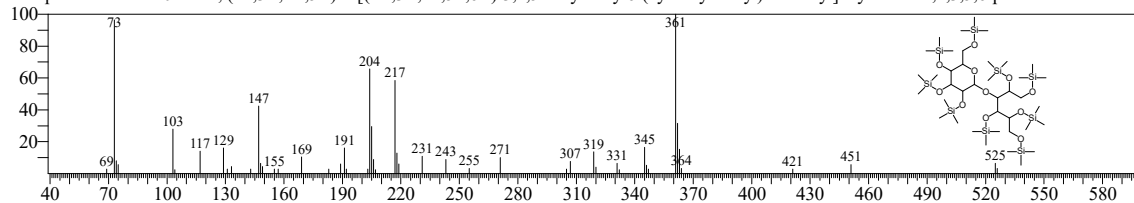

Hit#:2 Entry:552 Library:OA TMS DB5\_67min\_V3.lib

SI:56 Formula:C36H86O11Si8 CAS:99-20-7 MolWeight:918 RetIndex:2812

CompName:Trehalose-8TMS ; (2R,3S,4S,5R,6R)-2-(hydroxymethyl)-6-[(2R,3R,4S,5S,6R)-3,4,5-trihydroxy-6-(hydroxymethyl)oxan-2-yl]oxyoxane-



Hit#:3 Entry:545 Library:OA TMS DB5\_67min\_V3.lib

SI:55 Formula:C37H89NO11Si8 CAS:63-42-3 MolWeight:947 RetIndex:2760

CompName:Lactose-meto-8TMS(1) ; (2R,3R,4S,5R,6S)-2-(hydroxymethyl)-6-[(2R,3S,4R,5R,6R)-4,5,6-trihydroxy-2-(hydroxymethyl)oxan-3-yl]oxy

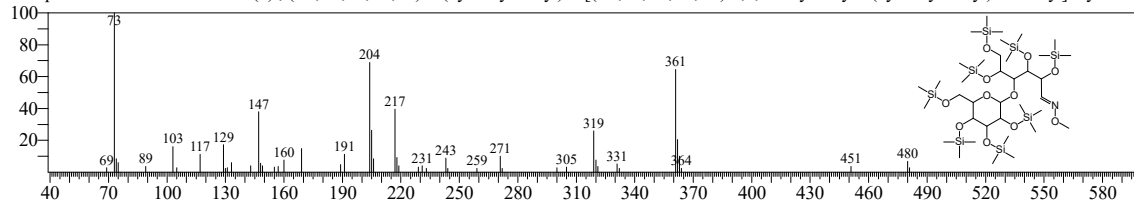

Hit#:4 Entry:555 Library:OA TMS DB5\_67min\_V3.lib

SI:55 Formula:C39H96O11Si9 CAS:585-86-4 MolWeight:992 RetIndex:2845

CompName:Lactitol-9TMS ; (2S,3R,4R,5R)-4-[(2S,3R,4S,5R,6R)-3,4,5-trihydroxy-6-(hydroxymethyl)oxan-2-yl]oxyhexane-1,2,3,5,6-pentol

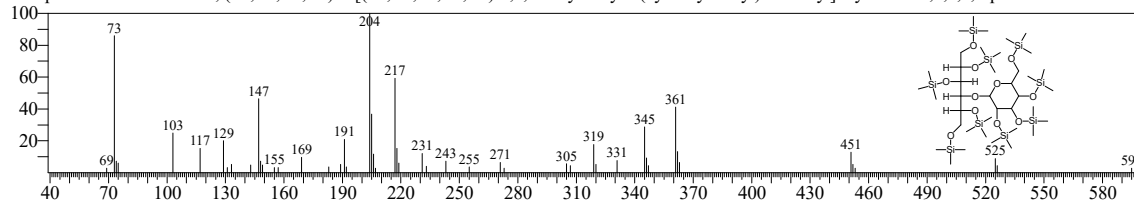

Hit#:5 Entry:561 Library:OA TMS DB5\_67min\_V3.lib

SI:55 Formula:C37H89NO11Si8 CAS:499-40-1 MolWeight:947 RetIndex:2983

CompName:Isomaltose-meto-8TMS(2) ; (3R,4S,5S,6R)-6-[(2S,3R,4S,5S,6R)-3,4,5-trihydroxy-6-(hydroxymethyl)oxan-2-yl]oxymethyl]oxane-2,3,

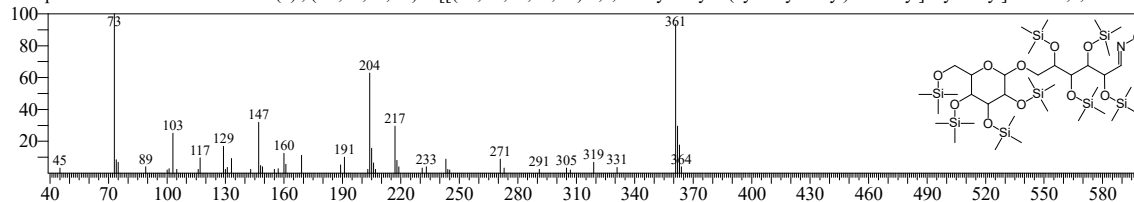

# TNAU

<< Target >>

Line#:44 R.Time:31.940(Scan#:5489) MassPeaks:287

RawMode:Averaged 31.935-31.945(5488-5490) BasePeak:217.10(1991)

BG Mode:Calc. from Peak Group 1 - Event 1 Q3 Scan

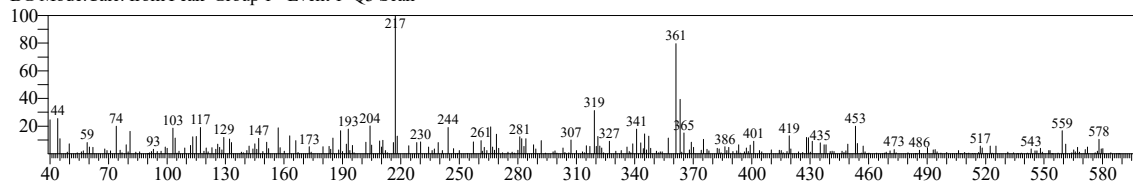

Hit#:1 Entry:559 Library:OA TMS DB5 67min V3.lib

SI:45 Formula:C39H96O11Si9 CAS:585-88-6 MolWeight:992 RetIndex:2923

CompName:Maltitol-9TMS ; (2S,3R,4R,5R)-4-[(2R,3R,4S,5S,6R)-3,4,5-trihydroxy-6-(hydroxymethyl)oxan-2-yl]oxyhexane-1,2,3,5,6-pentol

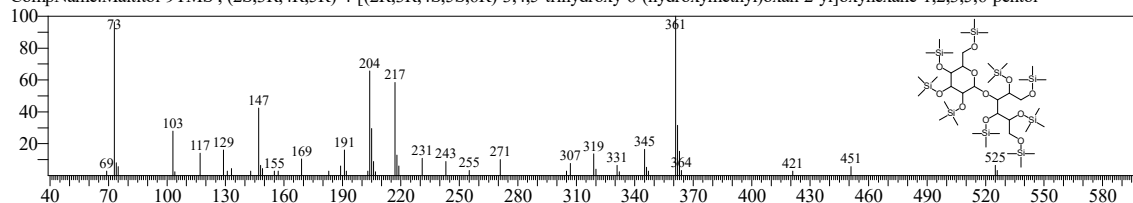

Hit#:2 Entry:555 Library:OA TMS DB5 67min V3.lib

SI:42 Formula:C39H96O11Si9 CAS:585-86-4 MolWeight:992 RetIndex:2845

CompName:Lactitol-9TMS ; (2S,3R,4R,5R)-4-[(2S,3R,4S,5R,6R)-3,4,5-trihydroxy-6-(hydroxymethyl)oxan-2-yl]oxyhexane-1,2,3,5,6-pentol

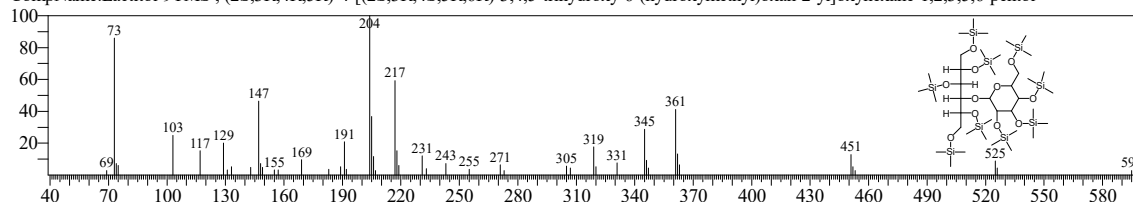

Hit#:3 Entry:560 Library:OA TMS DB5 67min V3.lib

SI:40 Formula:C37H89NO11Si8 CAS:499-40-1 MolWeight:947 RetIndex:2947

CompName:Isomaltose-meto-8TMS (1) ; (3R,4S,5S,6R)-6-[[[(2S,3R,4S,5S,6R)-3,4,5-trihydroxy-6-(hydroxymethyl)oxan-2-yl]oxymethyl]oxane-2,3,

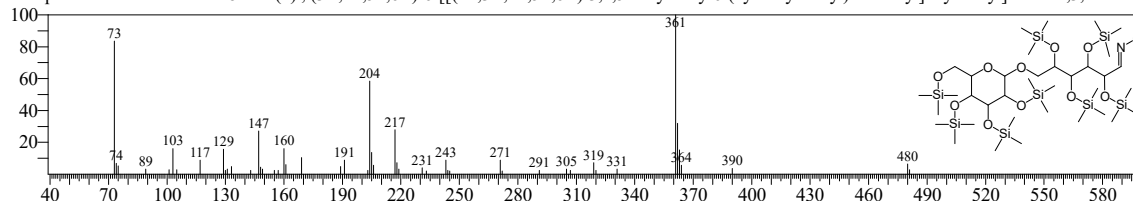

Hit#:4 Entry:552 Library:OA TMS DB5 67min V3.lib

SI:40 Formula:C36H86O11Si8 CAS:99-20-7 MolWeight:918 RetIndex:2812

CompName:Trehalose-8TMS ; (2R,3S,4S,5R,6R)-2-(hydroxymethyl)-6-[(2R,3R,4S,5S,6R)-3,4,5-trihydroxy-6-(hydroxymethyl)oxan-2-yl]oxyoxane-



Hit#:5 Entry:541 Library:OA TMS DB5 67min V3.lib

SI:39 Formula:C36H86O11Si8 CAS:57-50-1 MolWeight:918 RetIndex:2705

CompName:Sucrose-8TMS ; (2R,3R,4S,5S,6R)-2-[(2S,3S,4S,5R)-3,4-dihydroxy-2,5-bis(hydroxymethyl)oxolan-2-yl]oxy-6-(hydroxymethyl)oxane-3

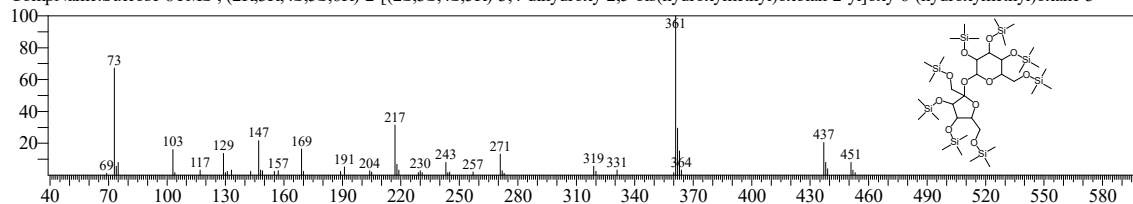

# TNAU

<< Target >>

Line#:45 R.Time:32.030(Scan#:5507) MassPeaks:279

RawMode:Averaged 32.025-32.035(5506-5508) BasePeak:217.10(2881)

BG Mode:Calc. from Peak Group 1 - Event 1 Q3 Scan

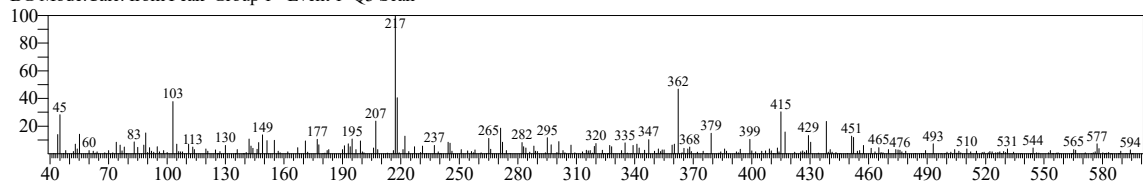

Hit#:1 Entry:326 Library:OA\_TMS\_DB5\_67min\_V3.lib

SI:34 Formula:C<sub>21</sub>H<sub>52</sub>O<sub>6</sub>Si<sub>5</sub> CAS:23140-52-5 MolWeight:540 RetIndex:1841

CompName:Psicose-5TMS(2) ; (3R,4R,5R)-1,3,4,5,6-pentahydroxyhexan-2-one

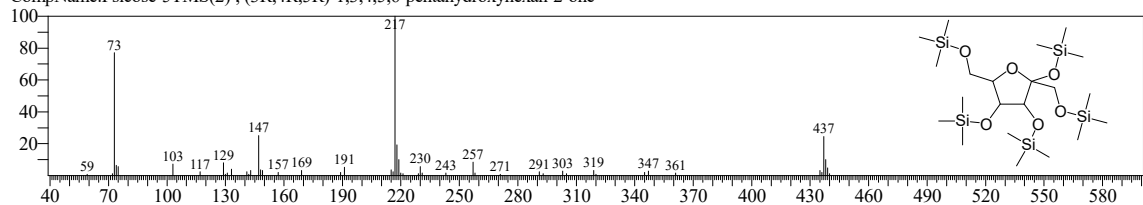

Hit#:2 Entry:230 Library:OA\_TMS\_DB5\_67min\_V3.lib

SI:34 Formula:C<sub>17</sub>H<sub>42</sub>O<sub>5</sub>Si<sub>4</sub> CAS:50-69-1 MolWeight:438 RetIndex:1666

CompName:Ribose-4TMS(2) ; (3R,4S,5R)-5-(hydroxymethyl)oxolane-2,3,4-triol

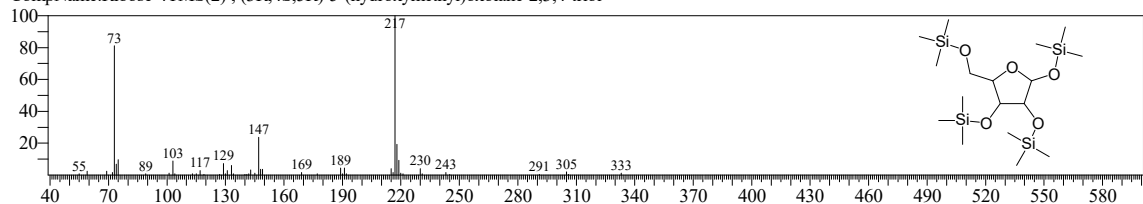

Hit#:3 Entry:412 Library:OA\_TMS\_DB5\_67min\_V3.lib

SI:29 Formula: CAS:0-00-0 MolWeight:403 RetIndex:1957

CompName:Tyrosine-13C6-3TMS ;

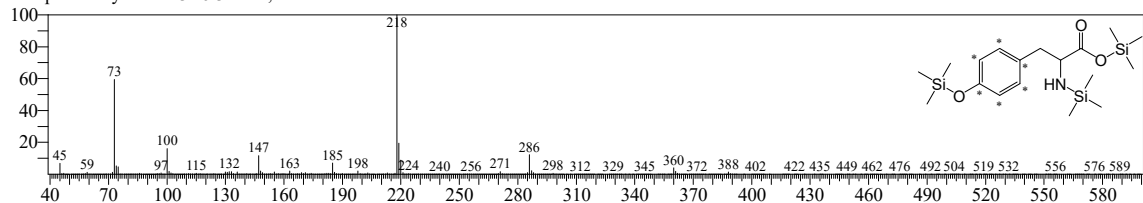

Hit#:4 Entry:239 Library:OA\_TMS\_DB5\_67min\_V3.lib

SI:29 Formula:C<sub>18</sub>H<sub>45</sub>NO<sub>5</sub>Si<sub>4</sub> CAS:58-86-6 MolWeight:467 RetIndex:1676

CompName:Xylose-meto-4TMS ; (2R,3S,4R)-2,3,4,5-tetrahydroxypentanal

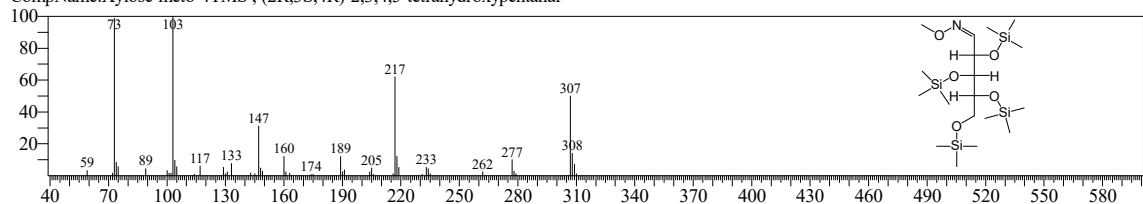

Hit#:5 Entry:130 Library:OA\_TMS\_DB5\_67min\_V3.lib

SI:26 Formula:C<sub>13</sub>H<sub>33</sub>NO<sub>3</sub>Si<sub>3</sub> CAS:672-15-1 MolWeight:335 RetIndex:1458

CompName:Homoserine-3TMS ; (2S)-2-amino-4-hydroxybutanoic acid

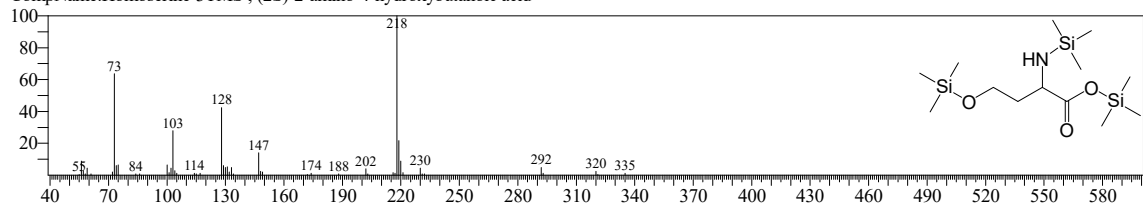

# TNAU

<< Target >>

Line#:46 R.Time:32.100(Scan#:5521) MassPeaks:295

RawMode:Averaged 32.095-32.105(5520-5522) BasePeak:363.20(1393)

BG Mode:Calc. from Peak Group 1 - Event 1 Q3 Scan

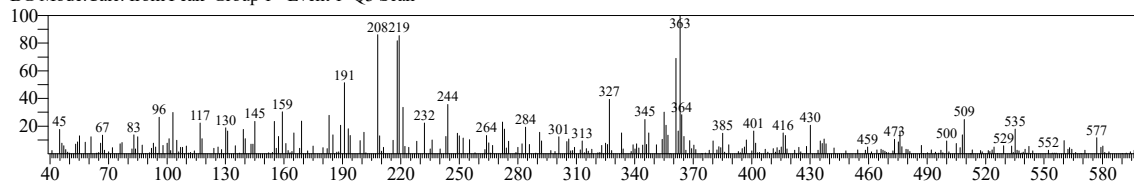

Hit#:1 Entry:552 Library:OA\_TMS\_DB5\_67min\_V3.lib

SI:38 Formula:C36H86O11Si8 CAS:99-20-7 MolWeight:918 RetIndex:2812

CompName:Trehalose-8TMS ; (2R,3S,4S,5R,6R)-2-(hydroxymethyl)-6-[(2R,3R,4S,5S,6R)-3,4,5-trihydroxy-6-(hydroxymethyl)oxan-2-yl]oxyoxane-

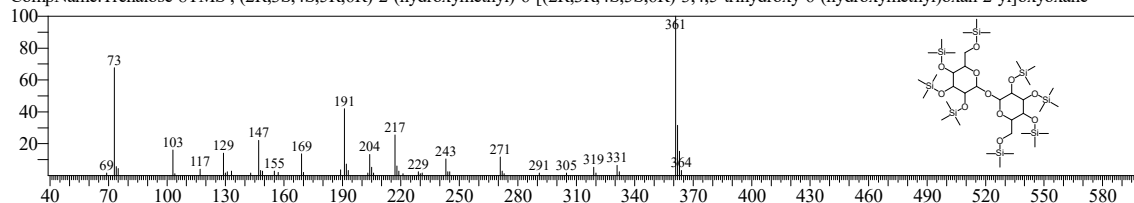

Hit#:2 Entry:541 Library:OA\_TMS\_DB5\_67min\_V3.lib

SI:33 Formula:C36H86O11Si8 CAS:57-50-1 MolWeight:918 RetIndex:2705

CompName:Sucrose-8TMS ; (2R,3R,4S,5S,6R)-2-[(2S,3S,4S,5R)-3,4-dihydroxy-2,5-bis(hydroxymethyl)oxolan-2-yl]oxy-6-(hydroxymethyl)oxane-3



Hit#:3 Entry:559 Library:OA\_TMS\_DB5\_67min\_V3.lib

SI:32 Formula:C39H96O11Si9 CAS:585-88-6 MolWeight:992 RetIndex:2923

CompName:Maltitol-9TMS ; (2S,3R,4R,5R)-4-[(2R,3R,4S,5S,6R)-3,4,5-trihydroxy-6-(hydroxymethyl)oxan-2-yl]oxyhexane-1,2,3,5,6-pentol

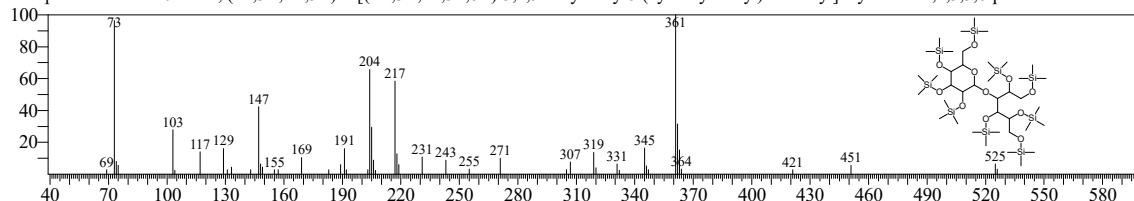

Hit#:4 Entry:560 Library:OA\_TMS\_DB5\_67min\_V3.lib

SI:32 Formula:C37H89NO11Si8 CAS:499-40-1 MolWeight:947 RetIndex:2947

CompName:Isomaltose-meto-8TMS(1) ; (3R,4S,5S,6R)-6-[[[(2S,3R,4S,5S,6R)-3,4,5-trihydroxy-6-(hydroxymethyl)oxan-2-yl]oxymethyl]oxane-2,3,



Hit#:5 Entry:412 Library:OA\_TMS\_DB5\_67min\_V3.lib

SI:25 Formula: CAS:0-00-0 MolWeight:403 RetIndex:1957

CompName:Tyrosine-13C6-3TMS ;

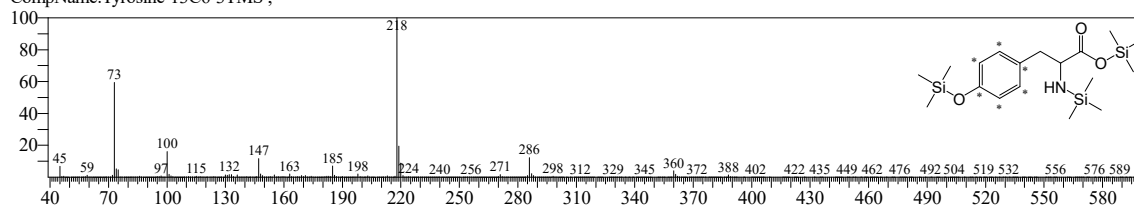



# TNAU

<< Target >>

Line#:47 R.Time:32.160(Scan#:5533) MassPeaks:291

RawMode:Averaged 32.155-32.165(5532-5534) BasePeak:361.20(1455)

BG Mode:Calc. from Peak Group 1 - Event 1 Q3 Scan

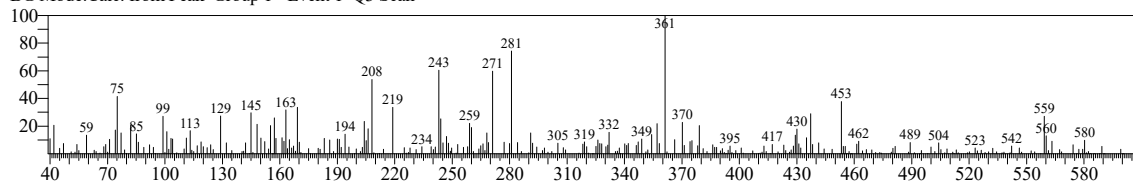

Hit#:1 Entry:541 Library:OA\_TMS\_DB5\_67min\_V3.lib

SI:35 Formula:C36H86O11Si8 CAS:57-50-1 MolWeight:918 RetIndex:2705

CompName:Sucrose-8TMS ; (2R,3R,4S,5S,6R)-2-[(2S,3S,4S,5R)-3,4-dihydroxy-2,5-bis(hydroxymethyl)oxolan-2-yl]oxy-6-(hydroxymethyl)oxane-3

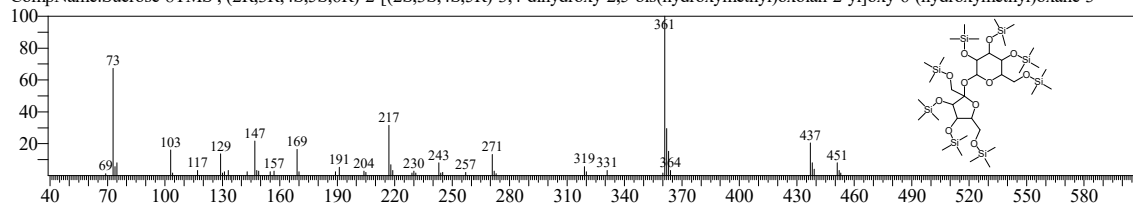

Hit#:2 Entry:560 Library:OA\_TMS\_DB5\_67min\_V3.lib

SI:35 Formula:C37H89NO11Si8 CAS:499-40-1 MolWeight:947 RetIndex:2947

CompName:Isomaltose-meto-8TMS(1) ; (3R,4S,5S,6R)-6-[[2S,3R,4S,5S,6R)-3,4,5-trihydroxy-6-(hydroxymethyl)oxan-2-yl]oxymethyl]oxane-2,3,

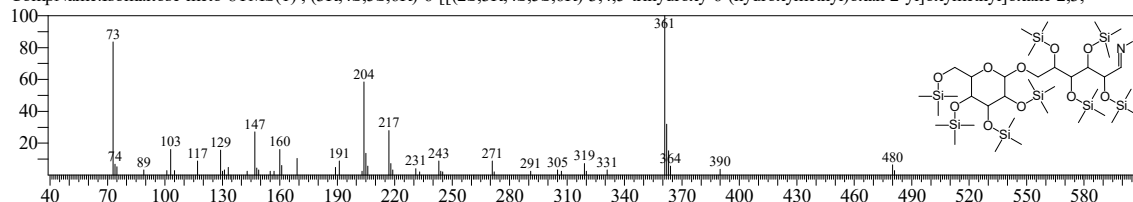

Hit#:3 Entry:552 Library:OA\_TMS\_DB5\_67min\_V3.lib

SI:33 Formula:C36H86O11Si8 CAS:99-20-7 MolWeight:918 RetIndex:2812

CompName:Trehalose-8TMS ; (2R,3S,4S,5R,6R)-2-(hydroxymethyl)-6-[(2R,3R,4S,5S,6R)-3,4,5-trihydroxy-6-(hydroxymethyl)oxan-2-yl]oxyoxane-



Hit#:4 Entry:559 Library:OA\_TMS\_DB5\_67min\_V3.lib

SI:32 Formula:C39H96O11Si9 CAS:585-88-6 MolWeight:992 RetIndex:2923

CompName:Maltitol-9TMS ; (2S,3R,4R,5R)-4-[(2R,3R,4S,5S,6R)-3,4,5-trihydroxy-6-(hydroxymethyl)oxan-2-yl]oxyhexane-1,2,3,5,6-pentol



Hit#:5 Entry:555 Library:OA\_TMS\_DB5\_67min\_V3.lib

SI:29 Formula:C39H96O11Si9 CAS:585-86-4 MolWeight:992 RetIndex:2845

CompName:Lactitol-9TMS ; (2S,3R,4R,5R)-4-[(2S,3R,4S,5R,6R)-3,4,5-trihydroxy-6-(hydroxymethyl)oxan-2-yl]oxyhexane-1,2,3,5,6-pentol

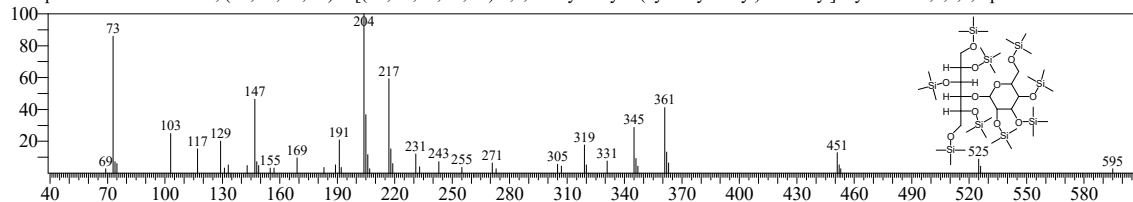

# TNAU

<< Target >>

Line#:48 R.Time:32.245(Scan#:5550) MassPeaks:292

RawMode:Averaged 32.240-32.250(5549-5551) BasePeak:361.15(1898)

BG Mode:Calc. from Peak Group 1 - Event 1 Q3 Scan

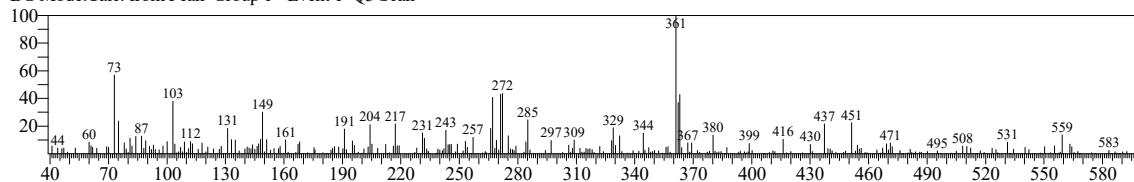

Hit#:1 Entry:541 Library:OA\_TMS\_DB5\_67min\_V3.lib

SI:55 Formula:C36H86O11Si8 CAS:57-50-1 MolWeight:918 RetIndex:2705

CompName:Sucrose-8TMS ; (2R,3R,4S,5S,6R)-2-[(2S,3S,4S,5R)-3,4-dihydroxy-2,5-bis(hydroxymethyl)oxolan-2-yl]oxy-6-(hydroxymethyl)oxane-3

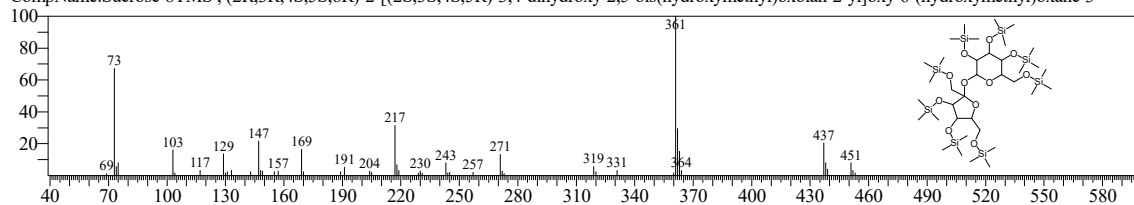

Hit#:2 Entry:552 Library:OA\_TMS\_DB5\_67min\_V3.lib

SI:53 Formula:C36H86O11Si8 CAS:99-20-7 MolWeight:918 RetIndex:2812

CompName:Trehalose-8TMS ; (2R,3S,4S,5R,6R)-2-(hydroxymethyl)-6-[(2R,3R,4S,5S,6R)-3,4,5-trihydroxy-6-(hydroxymethyl)oxan-2-yl]oxyoxane-



Hit#:3 Entry:560 Library:OA\_TMS\_DB5\_67min\_V3.lib

SI:52 Formula:C37H89NO11Si8 CAS:499-40-1 MolWeight:947 RetIndex:2947

CompName:Isomaltose-meto-8TMS(1) ; (3R,4S,5S,6R)-6-[[[(2S,3R,4S,5S,6R)-3,4,5-trihydroxy-6-(hydroxymethyl)oxan-2-yl]oxymethyl]oxane-2,3,

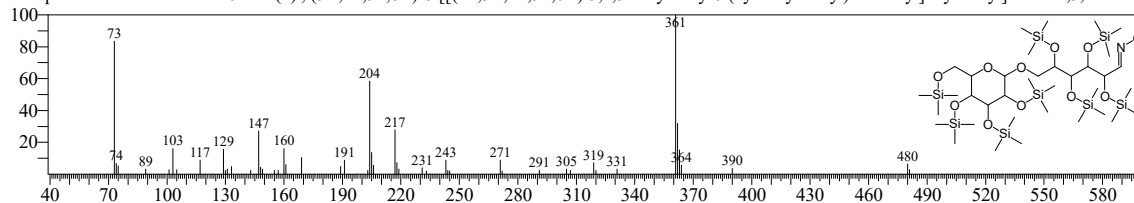

Hit#:4 Entry:556 Library:OA\_TMS\_DB5\_67min\_V3.lib

SI:51 Formula:C37H89NO11Si8 CAS:69-79-4 MolWeight:947 RetIndex:2846

CompName:Maltose-meto-8TMS(2) ; (2R,3S,4S,5R,6R)-2-(hydroxymethyl)-6-[(2R,3S,4R,5R,6R)-4,5,6-trihydroxy-2-(hydroxymethyl)oxan-3-yl]oxy

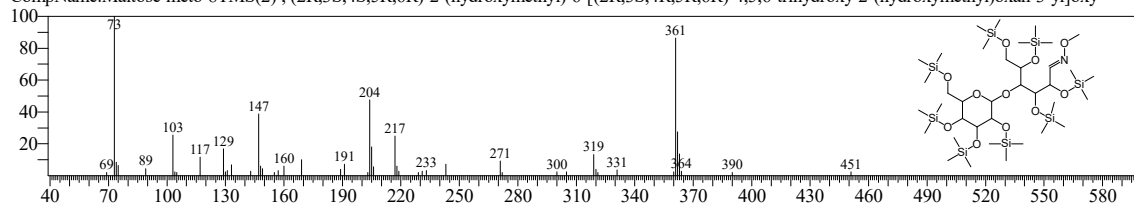

Hit#:5 Entry:559 Library:OA\_TMS\_DB5\_67min\_V3.lib

SI:50 Formula:C39H96O11Si9 CAS:585-88-6 MolWeight:992 RetIndex:2923

CompName:Maltitol-9TMS ; (2S,3R,4R,5R)-4-[(2R,3R,4S,5S,6R)-3,4,5-trihydroxy-6-(hydroxymethyl)oxan-2-yl]oxyhexane-1,2,3,5,6-pentol

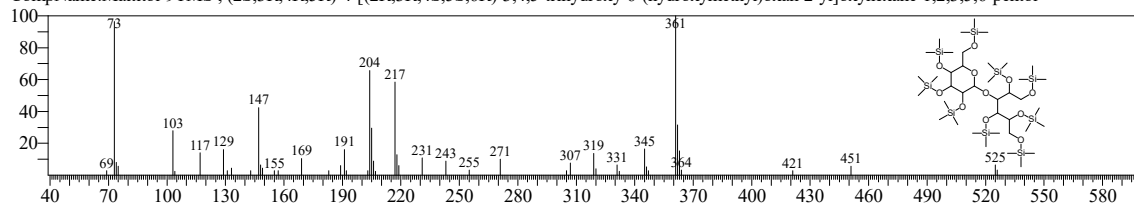

# TNAU

<< Target >>

Line#:49 R.Time:32.275(Scan#:5556) MassPeaks:295

RawMode:Averaged 32.270-32.280(5555-5557) BasePeak:73.05(2269)

BG Mode:Calc. from Peak Group 1 - Event 1 Q3 Scan

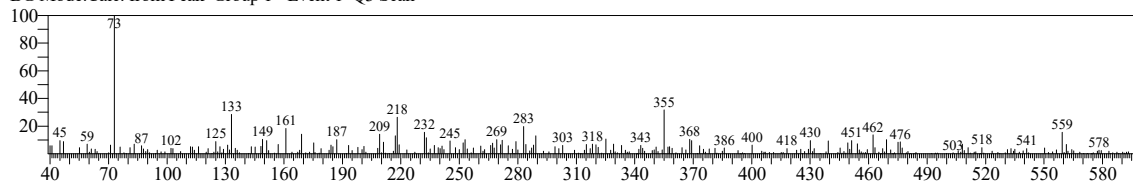

Hit#:1 Entry:463 Library:OA TMS\_DB5\_67min\_V3.lib

SI:40 Formula:C21H43NO4Si4 CAS:59-92-7 MolWeight:485 RetIndex:2123

CompName:Dopa-4TMS ; (2S)-2-amino-3-(3,4-dihydroxyphenyl)propanoic acid

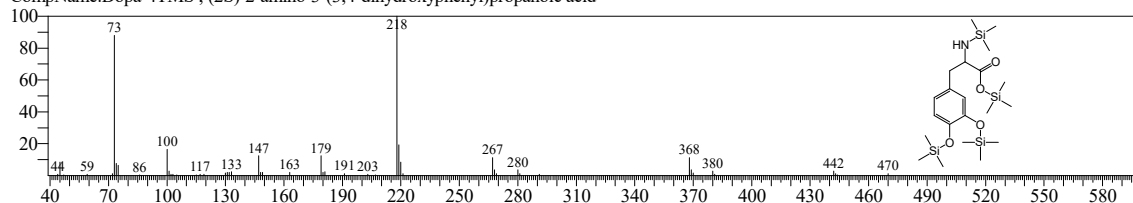

Hit#:2 Entry:523 Library:OA TMS\_DB5\_67min\_V3.lib

SI:40 Formula:C18H36N2O6Si3 CAS:58-96-8 MolWeight:460 RetIndex:2483

CompName:Uridine-3TMS ; 1-[(2R,3R,4S,5R)-3,4-dihydroxy-5-(hydroxymethyl)oxolan-2-yl]pyrimidine-2,4-dione

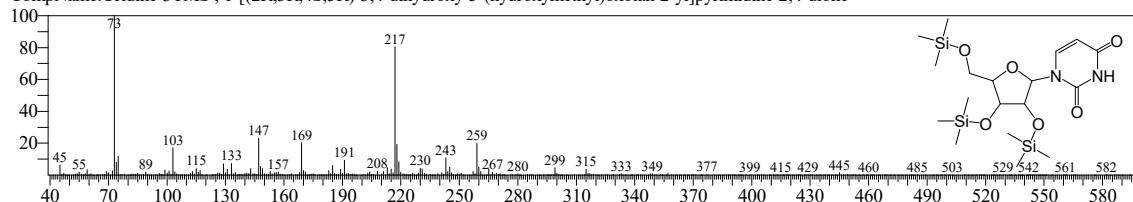

Hit#:3 Entry:159 Library:OA TMS\_DB5\_67min\_V3.lib

SI:38 Formula:C13H31NO4Si3 CAS:56-84-8 MolWeight:349 RetIndex:1529

CompName:Aspartic acid-3TMS ; (2S)-2-aminobutanedioic acid

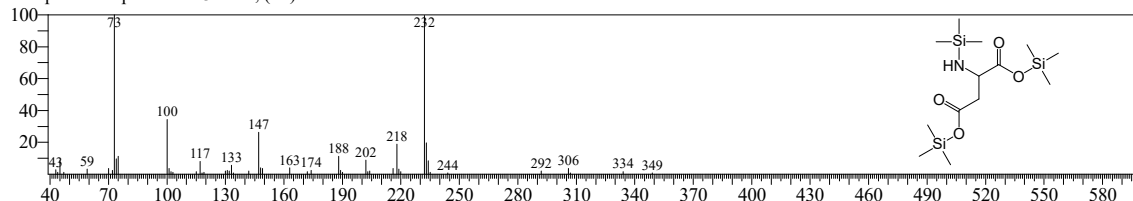

Hit#:4 Entry:251 Library:OA TMS\_DB5\_67min\_V3.lib

SI:38 Formula:C12H31NO4SSi3 CAS:2381-08-0 MolWeight:369 RetIndex:1693

CompName:3-Sulfinioalanine-3TMS ; 2-amino-3-sulfinopropanoic acid

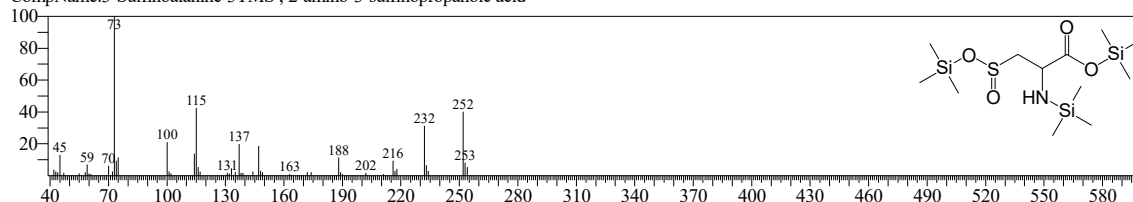

Hit#:5 Entry:542 Library:OA TMS\_DB5\_67min\_V3.lib

SI:38 Formula:C25H52N4O6Si5 CAS:146-80-5 MolWeight:645 RetIndex:2714

CompName:Xanthosine-5TMS ; 9-[(2R,3R,4S,5R)-3,4-dihydroxy-5-(hydroxymethyl)oxolan-2-yl]-3H-purine-2,6-dione

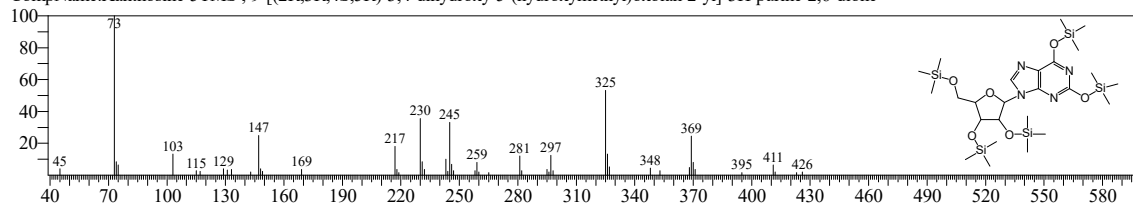

# TNAU

<< Target >>

Line#:50 R.Time:32.305(Scan#:5562) MassPeaks:273

RawMode:Averaged 32.300-32.310(5561-5563) BasePeak:217.10(4393)

BG Mode:Calc. from Peak Group 1 - Event 1 Q3 Scan

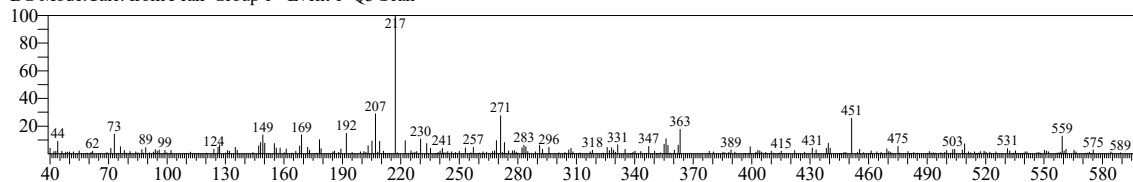

Hit#:1 Entry:326 Library:OA\_TMS\_DB5\_67min\_V3.lib

SI:41 Formula:C<sub>21</sub>H<sub>52</sub>O<sub>6</sub>Si<sub>5</sub> CAS:23140-52-5 MolWeight:540 RetIndex:1841

CompName:Psicose-5TMS(2) ; (3R,4R,5R)-1,3,4,5,6-pentahydroxyhexan-2-one

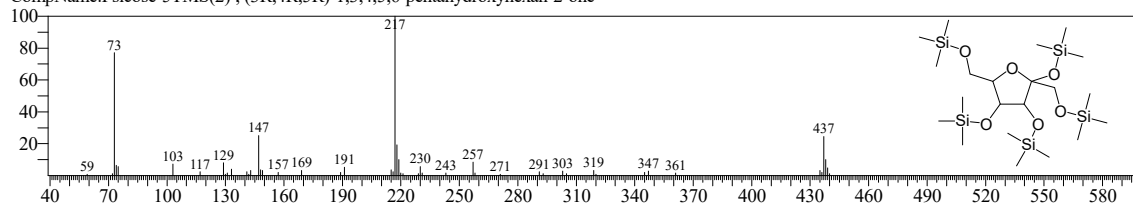

Hit#:2 Entry:230 Library:OA\_TMS\_DB5\_67min\_V3.lib

SI:40 Formula:C<sub>17</sub>H<sub>42</sub>O<sub>5</sub>Si<sub>4</sub> CAS:50-69-1 MolWeight:438 RetIndex:1666

CompName:Ribose-4TMS(2) ; (3R,4S,5R)-5-(hydroxymethyl)oxolane-2,3,4-triol

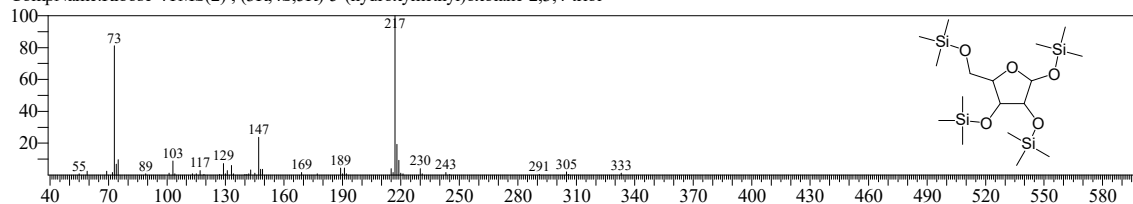

Hit#:3 Entry:323 Library:OA\_TMS\_DB5\_67min\_V3.lib

SI:39 Formula:C<sub>21</sub>H<sub>52</sub>O<sub>6</sub>Si<sub>5</sub> CAS:57-48-7 MolWeight:540 RetIndex:1839

CompName:Fructose-5TMS(2) ; (3S,4R,5R)-1,3,4,5,6-pentahydroxyhexan-2-one

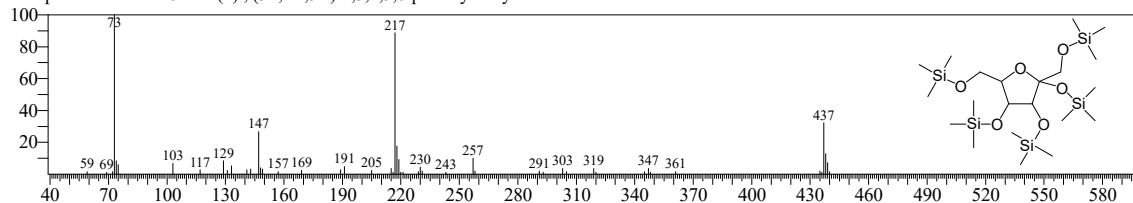

Hit#:4 Entry:434 Library:OA\_TMS\_DB5\_67min\_V3.lib

SI:38 Formula:C<sub>21</sub>H<sub>50</sub>O<sub>7</sub>Si<sub>5</sub> CAS:6556-12-3 MolWeight:554 RetIndex:1996

CompName:Glucuronic acid-5TMS(1) ; (2S,3S,4S,5R,6S)-3,4,5,6-tetrahydroxyoxane-2-carboxylic acid

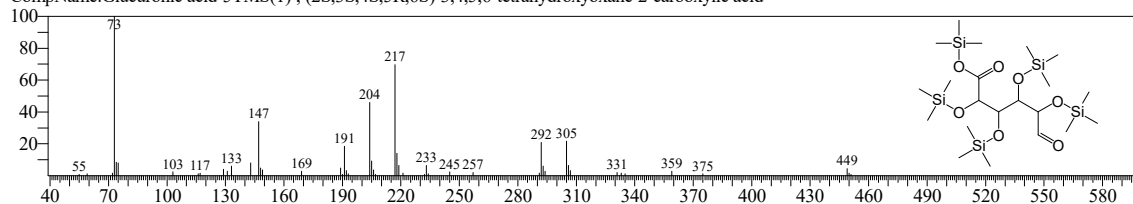

Hit#:5 Entry:335 Library:OA\_TMS\_DB5\_67min\_V3.lib

SI:38 Formula:C<sub>21</sub>H<sub>52</sub>O<sub>6</sub>Si<sub>5</sub> CAS:87-81-0 MolWeight:540 RetIndex:1853

CompName:Tagatose-5TMS(2) ; (3S,4S,5R)-1,3,4,5,6-pentahydroxyhexan-2-one

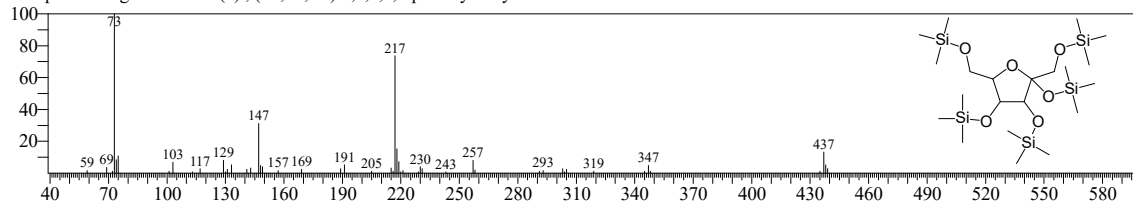

# TNAU

<< Target >>

Line#:51 R.Time:32.365(Scan#:5574) MassPeaks:288

RawMode:Averaged 32.360-32.370(5573-5575) BasePeak:217.15(2382)

BG Mode:Calc. from Peak Group 1 - Event 1 Q3 Scan

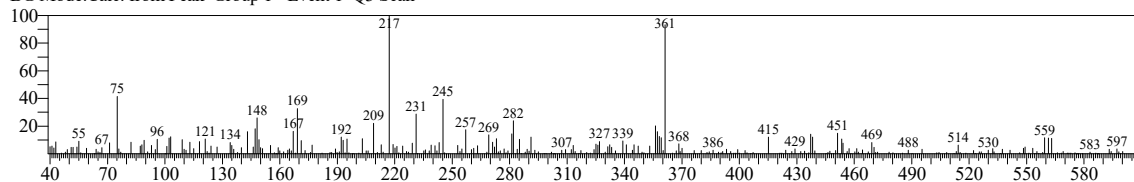

Hit#:1 Entry:541 Library:OA\_TMS\_DB5\_67min\_V3.lib

SI:45 Formula:C36H86O11Si8 CAS:57-50-1 MolWeight:918 RetIndex:2705

CompName:Sucrose-8TMS ; (2R,3R,4S,5S,6R)-2-[(2S,3S,4S,5R)-3,4-dihydroxy-2,5-bis(hydroxymethyl)oxolan-2-yl]oxy-6-(hydroxymethyl)oxane-3

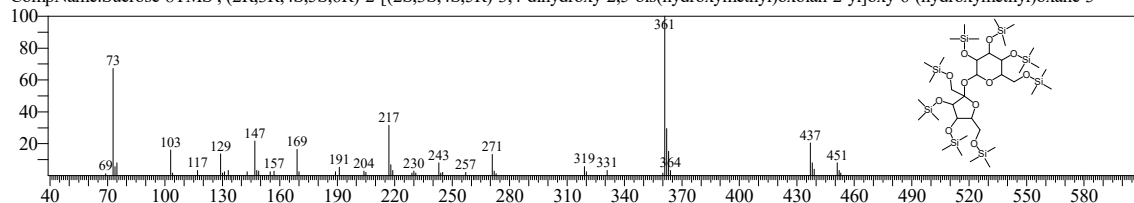

Hit#:2 Entry:552 Library:OA\_TMS\_DB5\_67min\_V3.lib

SI:40 Formula:C36H86O11Si8 CAS:99-20-7 MolWeight:918 RetIndex:2812

CompName:Trehalose-8TMS ; (2R,3S,4S,5R,6R)-2-(hydroxymethyl)-6-[(2R,3R,4S,5S,6R)-3,4,5-trihydroxy-6-(hydroxymethyl)oxan-2-yl]oxyoxane-

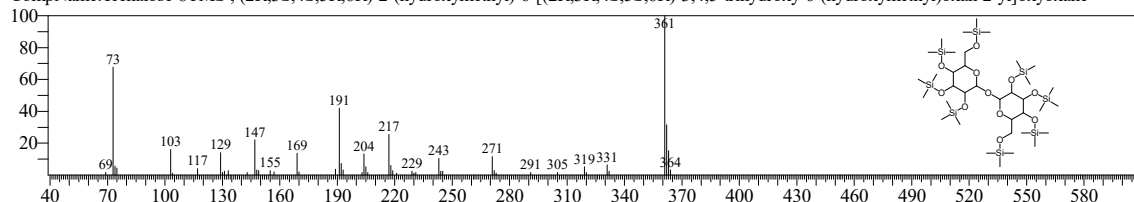

Hit#:3 Entry:326 Library:OA\_TMS\_DB5\_67min\_V3.lib

SI:39 Formula:C21H52O6Si5 CAS:23140-52-5 MolWeight:540 RetIndex:1841

CompName:Psicose-5TMS(2) ; (3R,4R,5R)-1,3,4,5,6-pentahydroxyhexan-2-one

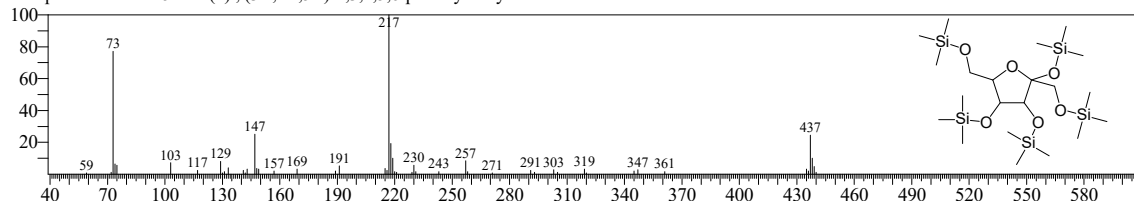

Hit#:4 Entry:559 Library:OA\_TMS\_DB5\_67min\_V3.lib

SI:37 Formula:C39H96O11Si9 CAS:585-88-6 MolWeight:992 RetIndex:2923

CompName:Maltitol-9TMS ; (2S,3R,4R,5R)-4-[(2R,3R,4S,5S,6R)-3,4,5-trihydroxy-6-(hydroxymethyl)oxan-2-yl]oxyhexane-1,2,3,5,6-pentol

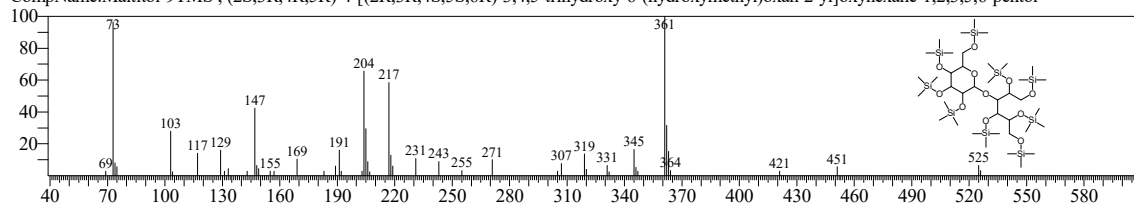

Hit#:5 Entry:560 Library:OA\_TMS\_DB5\_67min\_V3.lib

SI:37 Formula:C37H89NO11Si8 CAS:499-40-1 MolWeight:947 RetIndex:2947

CompName:Isomaltose-meto-8TMS(1) ; (3R,4S,5S,6R)-6-[[[(2S,3R,4S,5S,6R)-3,4,5-trihydroxy-6-(hydroxymethyl)oxan-2-yl]oxymethyl]oxane-2,3,

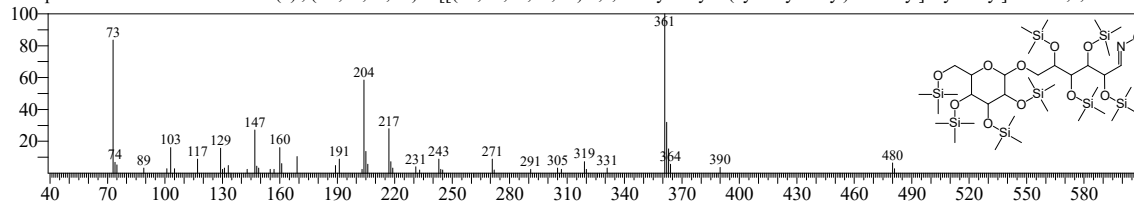

# TNAU

<< Target >>

Line#:52 R.Time:32.395(Scan#:5580) MassPeaks:267

RawMode:Averaged 32.390-32.400(5579-5581) BasePeak:217.10(1909)

BG Mode:Calc. from Peak Group 1 - Event 1 Q3 Scan

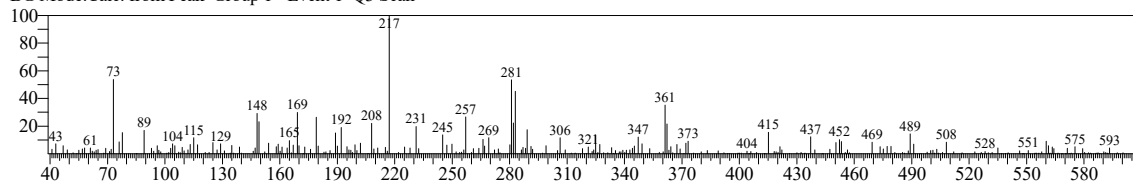

Hit#:1 Entry:541 Library:OA\_TMS\_DB5\_67min\_V3.lib

SI:41 Formula:C36H86O11Si8 CAS:57-50-1 MolWeight:918 RetIndex:2705

CompName:Sucrose-8TMS ; (2R,3R,4S,5S,6R)-2-[(2S,3S,4S,5R)-3,4-dihydroxy-2,5-bis(hydroxymethyl)oxolan-2-yl]oxy-6-(hydroxymethyl)oxane-3



Hit#:2 Entry:326 Library:OA\_TMS\_DB5\_67min\_V3.lib

SI:39 Formula:C21H52O6Si5 CAS:23140-52-5 MolWeight:540 RetIndex:1841

CompName:Psicose-5TMS(2) ; (3R,4R,5R)-1,3,4,5,6-pentahydroxyhexan-2-one

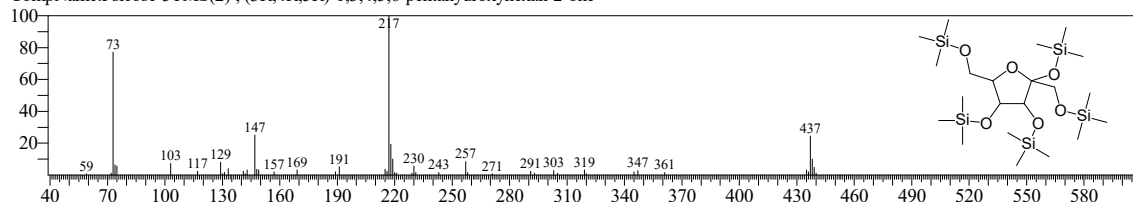

Hit#:3 Entry:323 Library:OA\_TMS\_DB5\_67min\_V3.lib

SI:39 Formula:C21H52O6Si5 CAS:57-48-7 MolWeight:540 RetIndex:1839

CompName:Fructose-5TMS(2) ; (3S,4R,5R)-1,3,4,5,6-pentahydroxyhexan-2-one

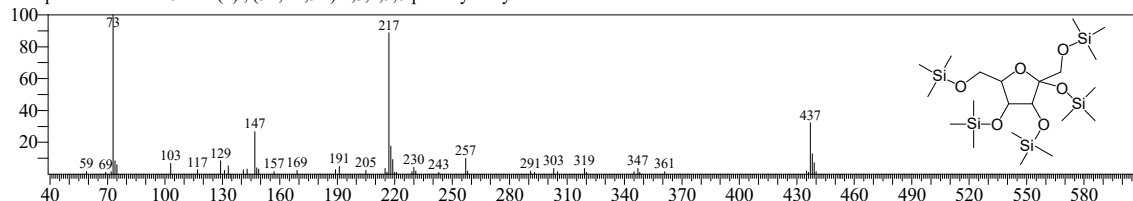

Hit#:4 Entry:230 Library:OA\_TMS\_DB5\_67min\_V3.lib

SI:38 Formula:C17H42O5Si4 CAS:50-69-1 MolWeight:438 RetIndex:1666

CompName:Ribose-4TMS(2) ; (3R,4S,5R)-5-(hydroxymethyl)oxolane-2,3,4-triol

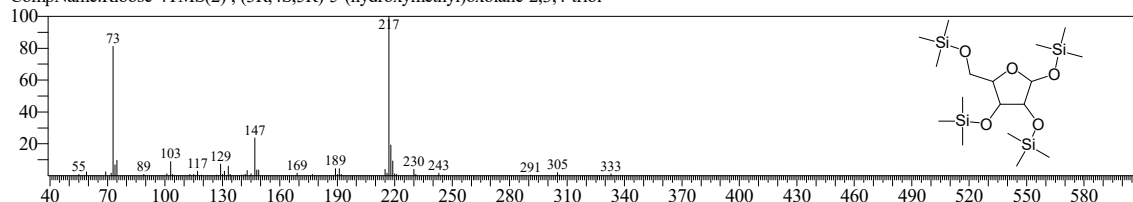

Hit#:5 Entry:523 Library:OA\_TMS\_DB5\_67min\_V3.lib

SI:37 Formula:C18H36N2O6Si3 CAS:58-96-8 MolWeight:460 RetIndex:2483

CompName:Uridine-3TMS ; 1-[(2R,3R,4S,5R)-3,4-dihydroxy-5-(hydroxymethyl)oxolan-2-yl]pyrimidine-2,4-dione

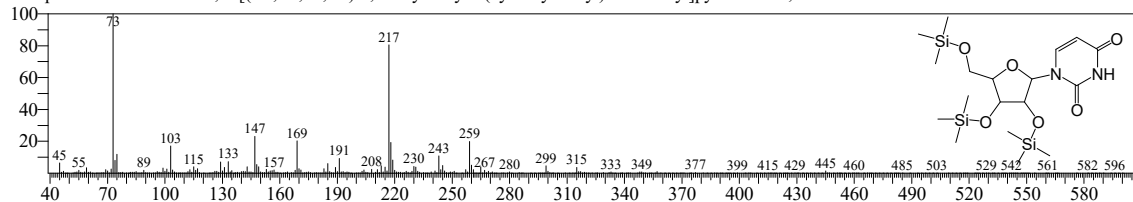

# TNAU

<< Target >>

Line#:53 R.Time:32.430(Scan#:5587) MassPeaks:282

RawMode:Averaged 32.425-32.435(5586-5588) BasePeak:281.10(1621)

BG Mode:Calc. from Peak Group 1 - Event 1 Q3 Scan

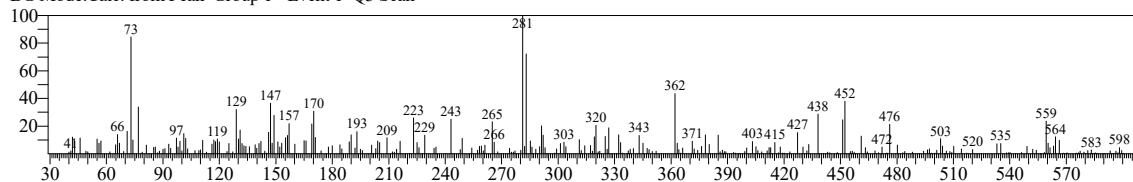

Hit#:1 Entry:565 Library:OA\_TMS\_DB5\_67min\_V3.lib

SI:33 Formula:C28H61N4O9PSi6 CAS:523-98-8 MolWeight:796 RetIndex:3118

CompName:Xanthosine monophosphate-6TMS ; [(2R,3S,4R)-5-(2,6-dioxo-3H-purin-9-yl)-3,4-dihydroxyoxolan-2-yl]methylidihydrogen phosphate

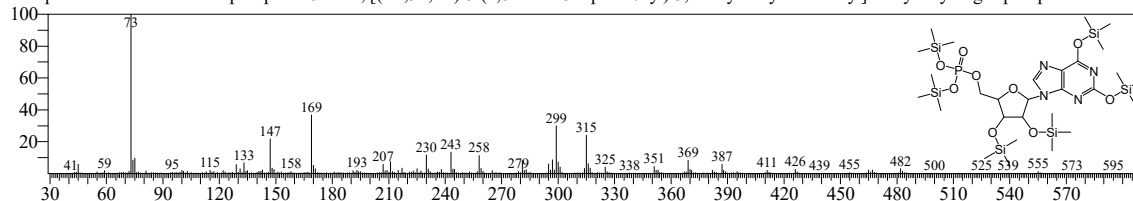

Hit#:2 Entry:156 Library:OA\_TMS\_DB5\_67min\_V3.lib

SI:33 Formula:C12H24O4Si2 CAS:4440-68-0 MolWeight:288 RetIndex:1522

CompName:2-Hexenedioic acid-2TMS ; hex-2-enedioic acid

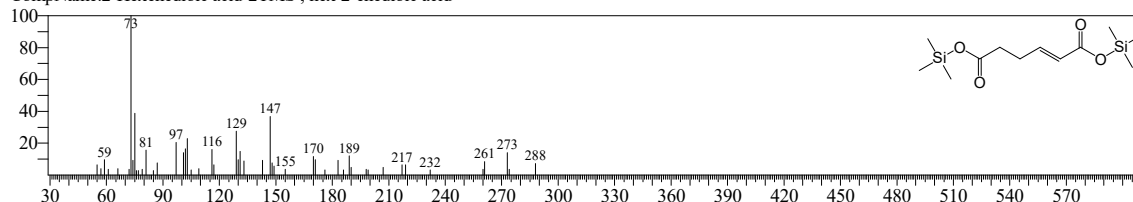

Hit#:3 Entry:519 Library:OA\_TMS\_DB5\_67min\_V3.lib

SI:32 Formula:C18H36N2O5Si3 CAS:951-78-0 MolWeight:444 RetIndex:2465

CompName:2'-Deoxyuridine-3TMS ; 1-[(2R,4S,5R)-4-hydroxy-5-(hydroxymethyl)oxolan-2-yl]pyrimidine-2,4-dione

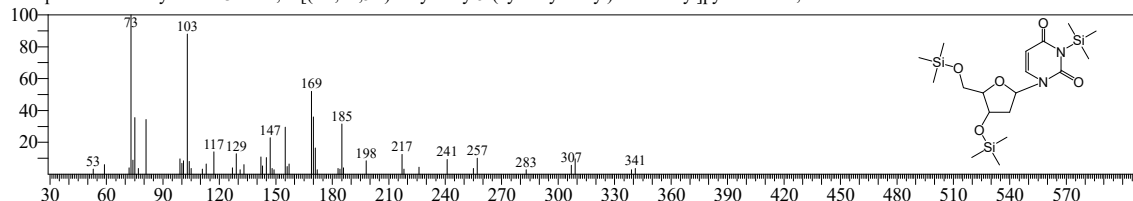

Hit#:4 Entry:375 Library:OA\_TMS\_DB5\_67min\_V3.lib

SI:32 Formula:C18H42O6Si4 CAS:90-80-2 MolWeight:466 RetIndex:1910

CompName:Glucono-1,5-lactone-4TMS ; (3R,4S,5S,6R)-3,4,5-trihydroxy-6-(hydroxymethyl)oxan-2-one

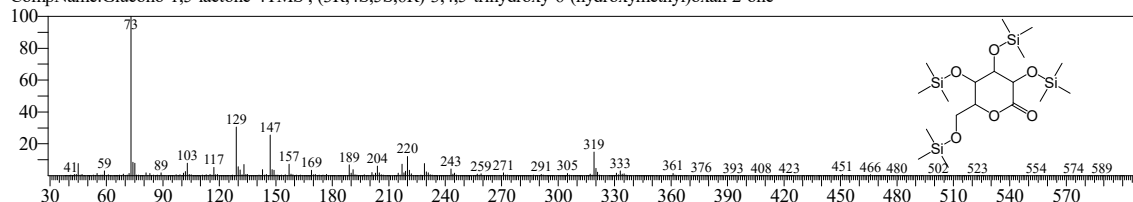

Hit#:5 Entry:545 Library:OA\_TMS\_DB5\_67min\_V3.lib

SI:31 Formula:C37H89NO11Si8 CAS:63-42-3 MolWeight:947 RetIndex:2760

CompName:Lactose-meto-8TMS(1) ; (2R,3R,4S,5R,6S)-2-(hydroxymethyl)-6-[(2R,3S,4R,5R,6R)-4,5,6-trihydroxy-2-(hydroxymethyl)oxan-3-yl]oxy

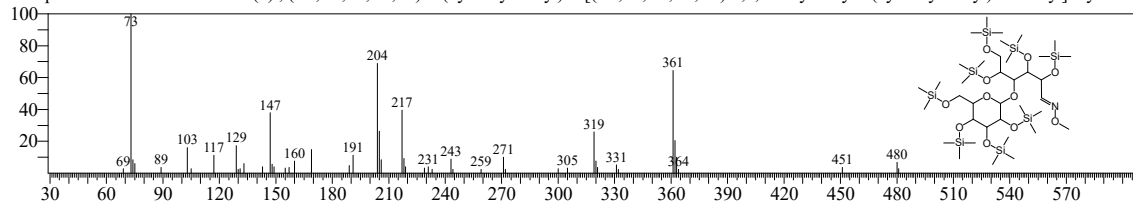

# TNAU

<< Target >>

Line#:54 R.Time:32.460(Scan#:5593) MassPeaks:289

RawMode:Averaged 32.455-32.465(5592-5594) BasePeak:207.05(1491)

BG Mode:Calc. from Peak Group 1 - Event 1 Q3 Scan

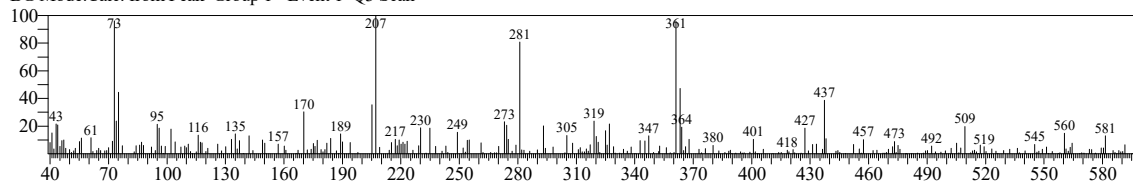

Hit#:1 Entry:541 Library:OA TMS DB5 67min V3.lib

SI:41 Formula:C36H86O11Si8 CAS:57-50-1 MolWeight:918 RetIndex:2705

CompName:Sucrose-8TMS ; (2R,3R,4S,5S,6R)-2-[(2S,3S,4S,5R)-3,4-dihydroxy-2,5-bis(hydroxymethyl)oxolan-2-yl]oxy-6-(hydroxymethyl)oxane-3

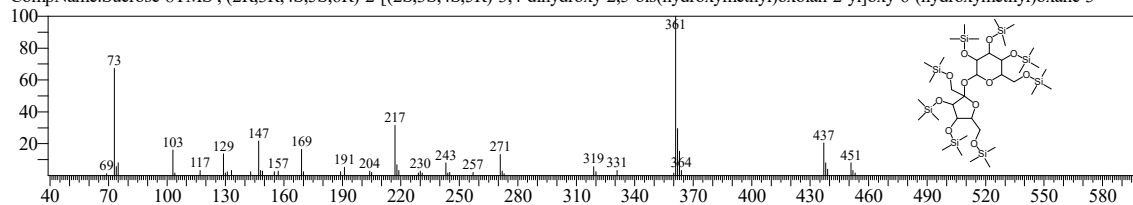

Hit#:2 Entry:561 Library:OA TMS DB5 67min V3.lib

SI:40 Formula:C37H89NO11Si8 CAS:499-40-1 MolWeight:947 RetIndex:2983

CompName:Isomaltose-meto-8TMS(2) ; (3R,4S,5S,6R)-6-[[[(2S,3R,4S,5S,6R)-3,4,5-trihydroxy-6-(hydroxymethyl)oxan-2-yl]oxymethyl]oxane-2,3,

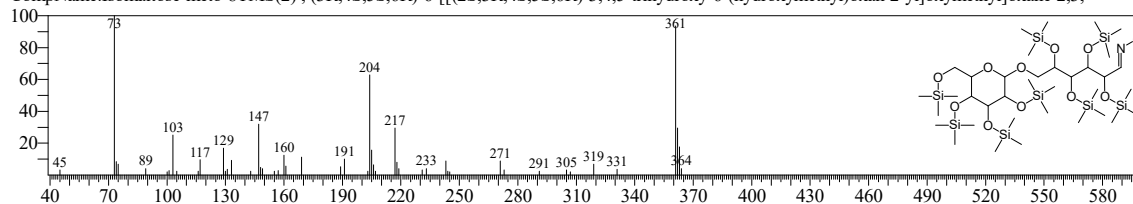

Hit#:3 Entry:559 Library:OA TMS DB5 67min V3.lib

SI:40 Formula:C39H96O11Si9 CAS:585-88-6 MolWeight:992 RetIndex:2923

CompName:Maltitol-9TMS ; (2S,3R,4R,5R)-4-[(2R,3R,4S,5S,6R)-3,4,5-trihydroxy-6-(hydroxymethyl)oxan-2-yl]oxyhexane-1,2,3,5,6-pentol

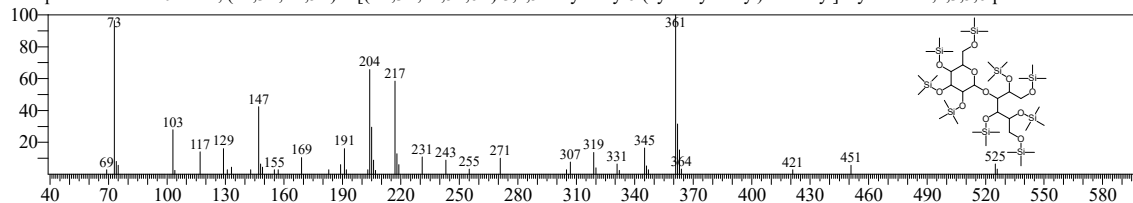

Hit#:4 Entry:334 Library:OA TMS DB5 67min V3.lib

SI:39 Formula:C21H52O6Si5 CAS:57-48-7 MolWeight:540 RetIndex:1852

CompName:Fructose-5TMS(3) ; (3S,4R,5R)-1,3,4,5,6-pentahydroxyhexan-2-one

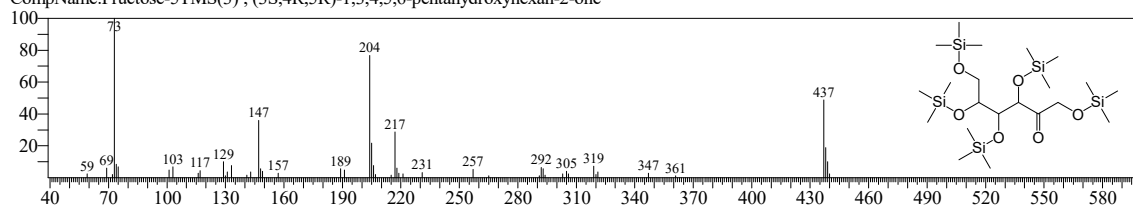

Hit#:5 Entry:553 Library:OA TMS DB5 67min V3.lib

SI:37 Formula:C37H89NO11Si8 CAS:69-79-4 MolWeight:947 RetIndex:2817

CompName:Maltose-meto-8TMS(1) ; (2R,3S,4S,5R,6R)-2-(hydroxymethyl)-6-[(2R,3S,4R,5R,6R)-4,5,6-trihydroxy-2-(hydroxymethyl)oxan-3-yl]oxy





# TNAU

<< Target >>

Line#:55 R.Time:32.505(Scan#:5602) MassPeaks:309

RawMode:Averaged 32.500-32.510(5601-5603) BasePeak:207.05(2137)

BG Mode:Calc. from Peak Group 1 - Event 1 Q3 Scan

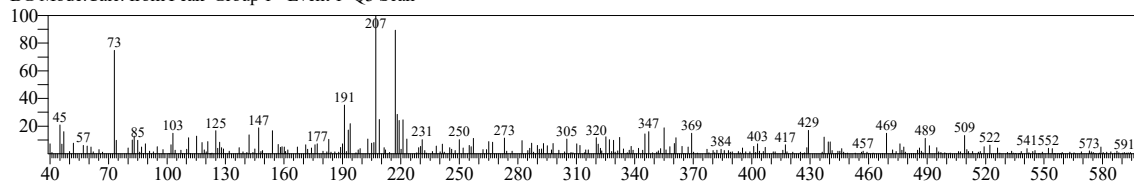

Hit#:1 Entry:326 Library:OA\_TMS\_DB5\_67min\_V3.lib

SI:48 Formula:C<sub>21</sub>H<sub>52</sub>O<sub>6</sub>Si<sub>5</sub> CAS:23140-52-5 MolWeight:540 RetIndex:1841

CompName:Psicose-5TMS(2) ; (3R,4R,5R)-1,3,4,5,6-pentahydroxyhexan-2-one

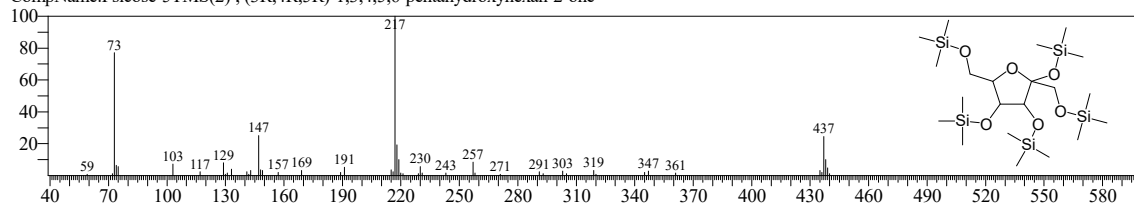

Hit#:2 Entry:323 Library:OA\_TMS\_DB5\_67min\_V3.lib

SI:47 Formula:C<sub>21</sub>H<sub>52</sub>O<sub>6</sub>Si<sub>5</sub> CAS:57-48-7 MolWeight:540 RetIndex:1839

CompName:Fructose-5TMS(2) ; (3S,4R,5R)-1,3,4,5,6-pentahydroxyhexan-2-one

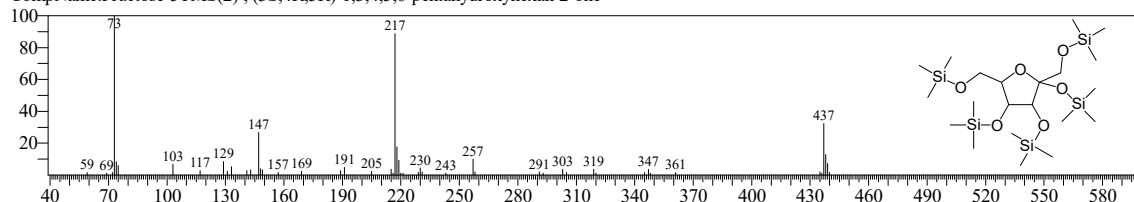

Hit#:3 Entry:236 Library:OA\_TMS\_DB5\_67min\_V3.lib

SI:47 Formula:C<sub>17</sub>H<sub>42</sub>O<sub>5</sub>Si<sub>4</sub> CAS:50-69-1 MolWeight:438 RetIndex:1673

CompName:Ribose-4TMS(3) ; (3R,4S,5R)-5-(hydroxymethyl)oxolane-2,3,4-triol

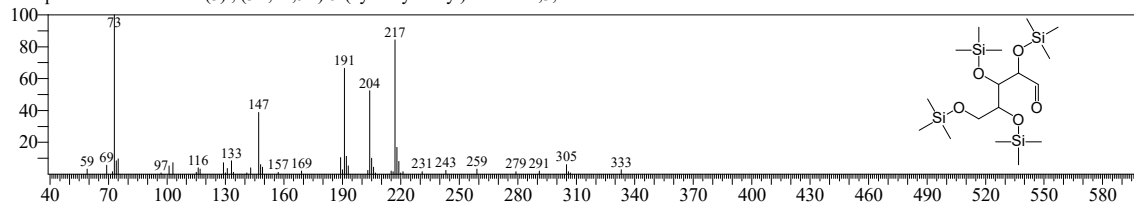

Hit#:4 Entry:232 Library:OA\_TMS\_DB5\_67min\_V3.lib

SI:46 Formula:C<sub>17</sub>H<sub>42</sub>O<sub>5</sub>Si<sub>4</sub> CAS:10323-20-3 MolWeight:438 RetIndex:1667

CompName:Arabinose-4TMS(2) ; (2S,3R,4R)-2,3,4,5-tetrahydroxypentanal

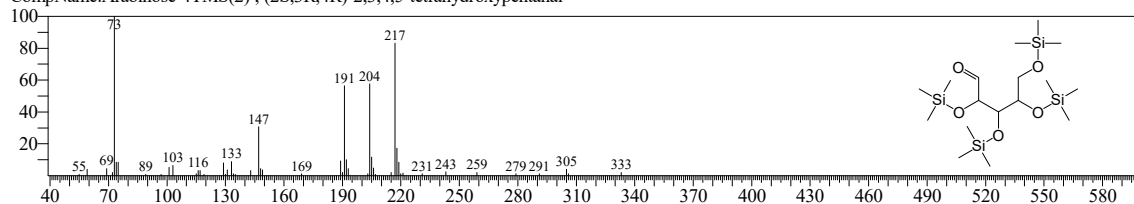

Hit#:5 Entry:335 Library:OA\_TMS\_DB5\_67min\_V3.lib

SI:45 Formula:C<sub>21</sub>H<sub>52</sub>O<sub>6</sub>Si<sub>5</sub> CAS:87-81-0 MolWeight:540 RetIndex:1853

CompName:Tagatose-5TMS(2) ; (3S,4S,5R)-1,3,4,5,6-pentahydroxyhexan-2-one

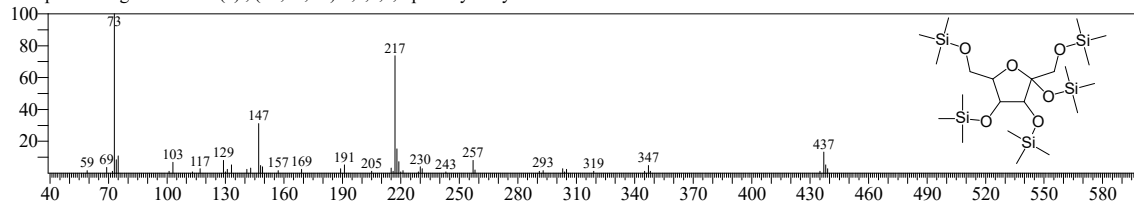

# TNAU

<< Target >>

Line#:56 R.Time:32.590(Scan#:5619) MassPeaks:259

RawMode:Averaged 32.585-32.595(5618-5620) BasePeak:361.20(1338)

BG Mode:Calc. from Peak Group 1 - Event 1 Q3 Scan

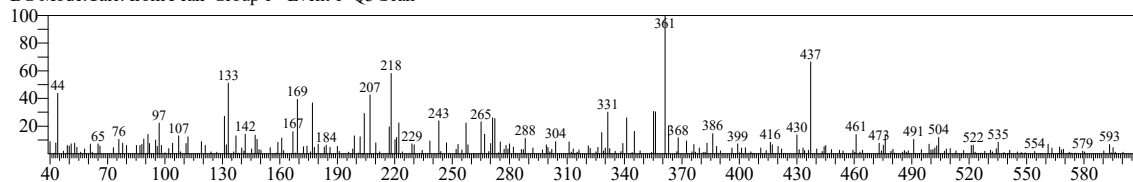

Hit#:1 Entry:541 Library:OA\_TMS\_DB5\_67min\_V3.lib

SI:39 Formula:C36H86O11Si8 CAS:57-50-1 MolWeight:918 RetIndex:2705

CompName:Sucrose-8TMS ; (2R,3R,4S,5S,6R)-2-[(2S,3S,4S,5R)-3,4-dihydroxy-2,5-bis(hydroxymethyl)oxolan-2-yl]oxy-6-(hydroxymethyl)oxane-3



Hit#:2 Entry:559 Library:OA\_TMS\_DB5\_67min\_V3.lib

SI:37 Formula:C39H96O11Si9 CAS:585-88-6 MolWeight:992 RetIndex:2923

CompName:Maltitol-9TMS ; (2S,3R,4R,5R)-4-[(2R,3R,4S,5S,6R)-3,4,5-trihydroxy-6-(hydroxymethyl)oxan-2-yl]oxyhexane-1,2,3,5,6-pentol



Hit#:3 Entry:560 Library:OA\_TMS\_DB5\_67min\_V3.lib

SI:37 Formula:C37H89NO11Si8 CAS:499-40-1 MolWeight:947 RetIndex:2947

CompName:Isomaltose-meto-8TMS (1) ; (3R,4S,5S,6R)-6-[[[(2S,3R,4S,5S,6R)-3,4,5-trihydroxy-6-(hydroxymethyl)oxan-2-yl]oxymethyl]oxane-2,3,

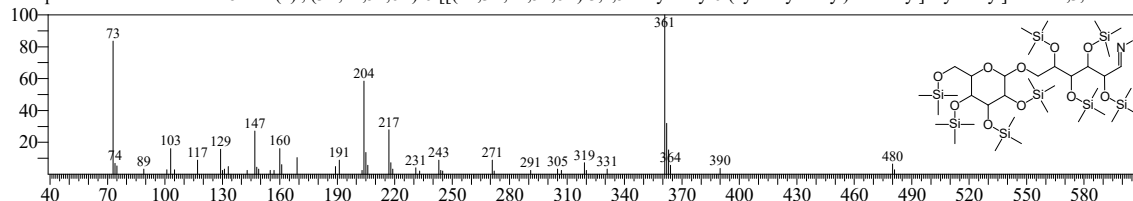

Hit#:4 Entry:552 Library:OA\_TMS\_DB5\_67min\_V3.lib

SI:35 Formula:C36H86O11Si8 CAS:99-20-7 MolWeight:918 RetIndex:2812

CompName:Trehalose-8TMS ; (2R,3S,4S,5R,6R)-2-(hydroxymethyl)-6-[(2R,3R,4S,5S,6R)-3,4,5-trihydroxy-6-(hydroxymethyl)oxan-2-yl]oxyoxane-



Hit#:5 Entry:555 Library:OA\_TMS\_DB5\_67min\_V3.lib

SI:33 Formula:C39H96O11Si9 CAS:585-86-4 MolWeight:992 RetIndex:2845

CompName:Lactitol-9TMS ; (2S,3R,4R,5R)-4-[(2S,3R,4S,5R,6R)-3,4,5-trihydroxy-6-(hydroxymethyl)oxan-2-yl]oxyhexane-1,2,3,5,6-pentol



# TNAU

<< Target >>

Line#:57 R.Time:32.645(Scan#:5630) MassPeaks:281

RawMode:Averaged 32.640-32.650(5629-5631) BasePeak:281.05(1724)

BG Mode:Calc. from Peak Group 1 - Event 1 Q3 Scan

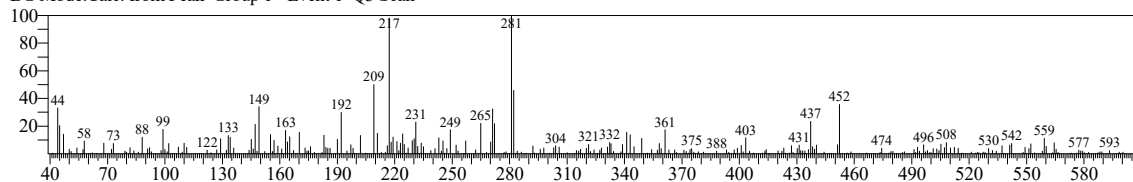

Hit#:1 Entry:326 Library:OA TMS\_DB5\_67min\_V3.lib

SI:35 Formula:C21H52O6Si5 CAS:23140-52-5 MolWeight:540 RetIndex:1841

CompName:Psicose-5TMS(2) ; (3R,4R,5R)-1,3,4,5,6-pentahydroxyhexan-2-one

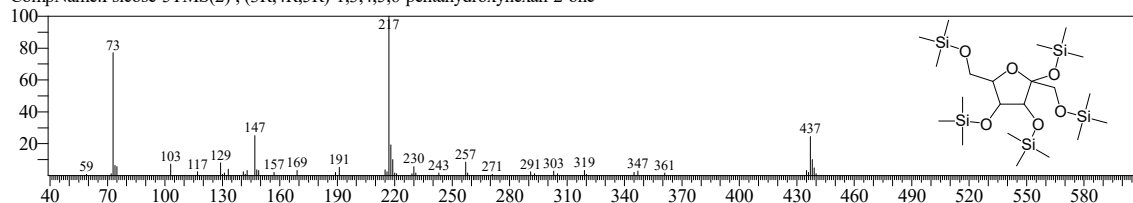

Hit#:2 Entry:541 Library:OA TMS\_DB5\_67min\_V3.lib

SI:34 Formula:C36H86O11Si8 CAS:57-50-1 MolWeight:918 RetIndex:2705

CompName:Sucrose-8TMS ; (2R,3R,4S,5S,6R)-2-[(2S,3S,4S,5R)-3,4-dihydroxy-2,5-bis(hydroxymethyl)oxolan-2-yl]oxy-6-(hydroxymethyl)oxane-3



Hit#:3 Entry:230 Library:OA TMS\_DB5\_67min\_V3.lib

SI:31 Formula:C17H42O5Si4 CAS:50-69-1 MolWeight:438 RetIndex:1666

CompName:Ribose-4TMS(2) ; (3R,4S,5R)-5-(hydroxymethyl)oxolane-2,3,4-triol

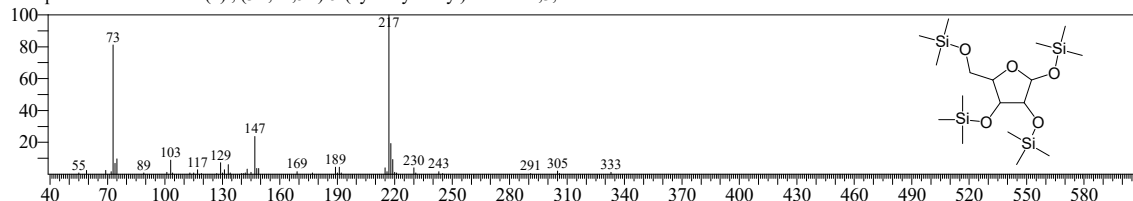

Hit#:4 Entry:552 Library:OA TMS\_DB5\_67min\_V3.lib

SI:30 Formula:C36H86O11Si8 CAS:99-20-7 MolWeight:918 RetIndex:2812

CompName:Trehalose-8TMS ; (2R,3S,4S,5R,6R)-2-(hydroxymethyl)-6-[(2R,3R,4S,5S,6R)-3,4,5-trihydroxy-6-(hydroxymethyl)oxan-2-yl]oxyoxane-

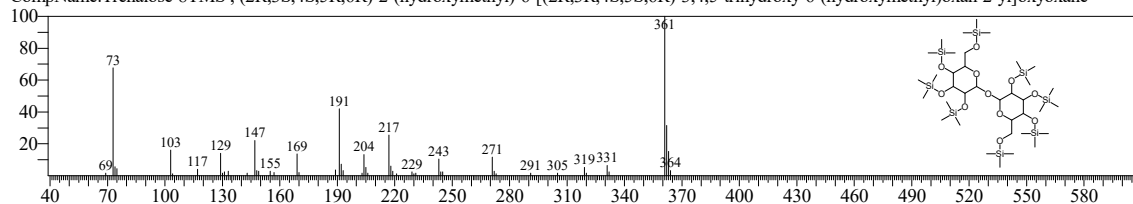

Hit#:5 Entry:559 Library:OA TMS\_DB5\_67min\_V3.lib

SI:28 Formula:C39H96O11Si9 CAS:585-88-6 MolWeight:992 RetIndex:2923

CompName:Maltitol-9TMS ; (2S,3R,4R,5R)-4-[(2R,3R,4S,5S,6R)-3,4,5-trihydroxy-6-(hydroxymethyl)oxan-2-yl]oxyhexane-1,2,3,5,6-pentol

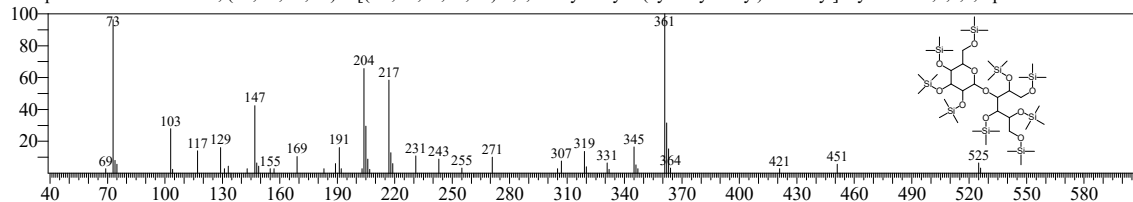

<< Target >>

Line#:58 R.Time:32.745(Scan#:5650) MassPeaks:306

RawMode:Averaged 32.740-32.750(5649-5651) BasePeak:282.00(967)

BG Mode:Calc. from Peak Group 1 - Event 1 Q3 Scan

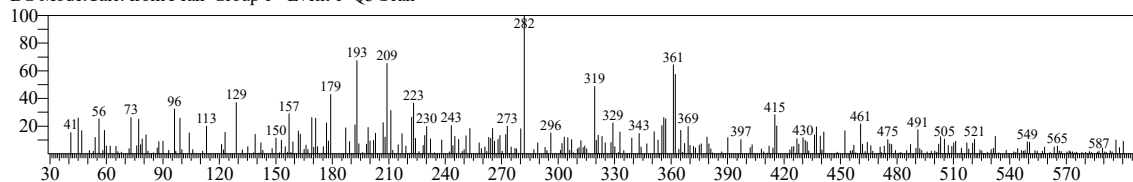

Hit#:1 Entry:343 Library:OA TMS DB5\_67min\_V3.lib

SI:30 Formula:C18H37NO3Si3 CAS:51-43-4 MolWeight:399 RetIndex:1868

CompName:Epinephrine-3TMS ; 4-[(1R)-1-hydroxy-2-(methylamino)ethyl]benzene-1,2-diol

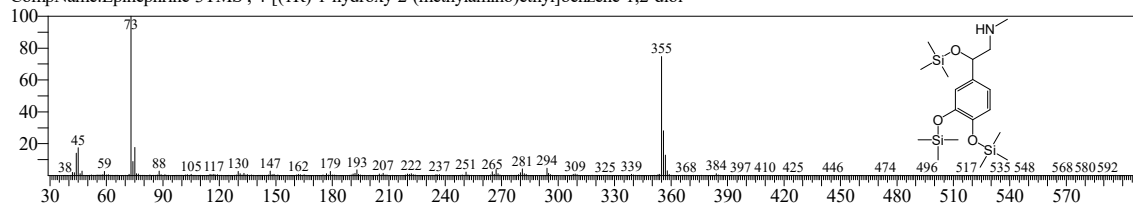

Hit#:2 Entry:552 Library:OA TMS DB5\_67min\_V3.lib

SI:28 Formula:C36H86O11Si8 CAS:99-20-7 MolWeight:918 RetIndex:2812

CompName:Trehalose-8TMS ; (2R,3S,4S,5R,6R)-2-(hydroxymethyl)-6-[(2R,3R,4S,5S,6R)-3,4,5-trihydroxy-6-(hydroxymethyl)oxan-2-yl]oxyoxane-

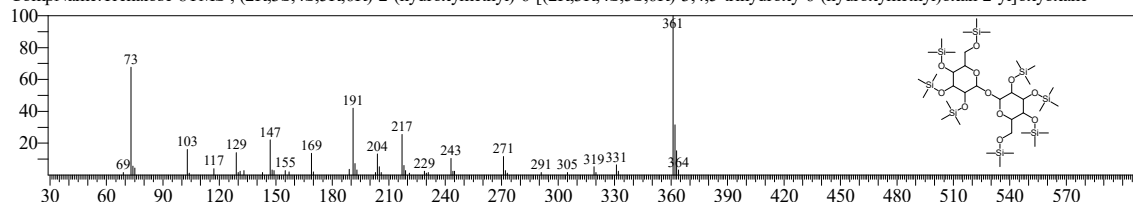

Hit#:3 Entry:541 Library:OA TMS DB5\_67min\_V3.lib

SI:28 Formula:C36H86O11Si8 CAS:57-50-1 MolWeight:918 RetIndex:2705

CompName:Sucrose-8TMS ; (2R,3R,4S,5S,6R)-2-[(2S,3S,4S,5R)-3,4-dihydroxy-2,5-bis(hydroxymethyl)oxolan-2-yl]oxy-6-(hydroxymethyl)oxane-3

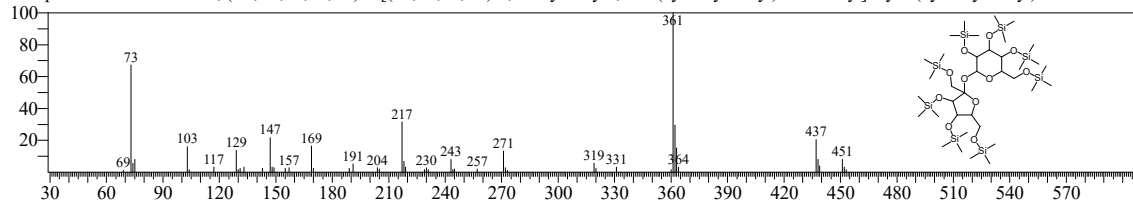

Hit#:4 Entry:290 Library:OA TMS DB5\_67min\_V3.lib

SI:27 Formula:C13H23NO3Si2 CAS:548-93-6 MolWeight:297 RetIndex:1773

CompName:3-Hydroxyanthranilic acid-2TMS ; 2-amino-3-hydroxybenzoic acid

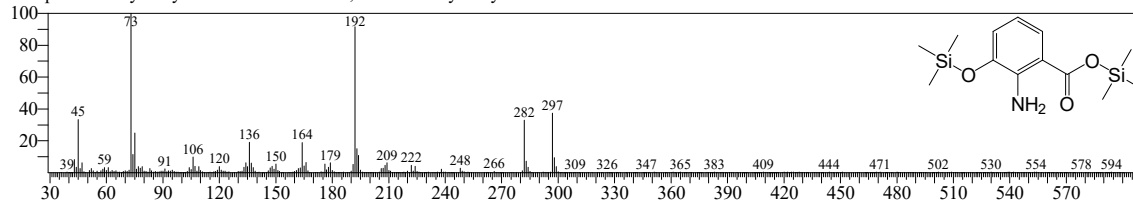

Hit#:5 Entry:315 Library:OA TMS DB5\_67min\_V3.lib

SI:26 Formula:C16H30O4Si3 CAS:99-50-3 MolWeight:370 RetIndex:1833

CompName:Protocatechuic acid-3TMS ; 3,4-dihydroxybenzoic acid

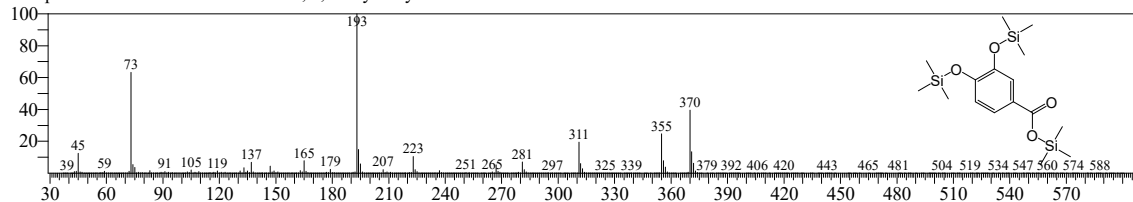

# TNAU

<< Target >>

Line#:59 R.Time:32.775(Scan#:5656) MassPeaks:288

RawMode:Averaged 32.770-32.780(5655-5657) BasePeak:169.05(1013)

BG Mode:Calc. from Peak Group 1 - Event 1 Q3 Scan

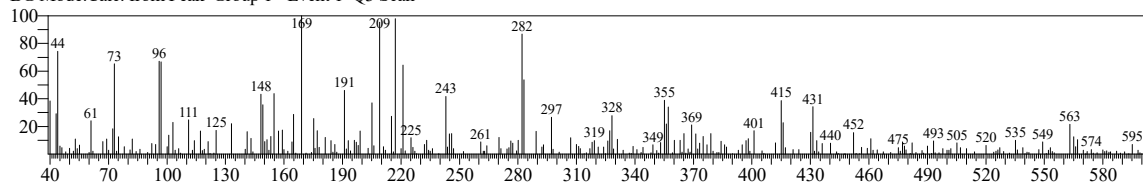

Hit#:1 Entry:236 Library:OA\_TMS\_DB5\_67min\_V3.lib

SI:33 Formula:C17H42O5Si4 CAS:50-69-1 MolWeight:438 RetIndex:1673

CompName:Ribose-4TMS(3) ; (3R,4S,5R)-5-(hydroxymethyl)oxolane-2,3,4-triol

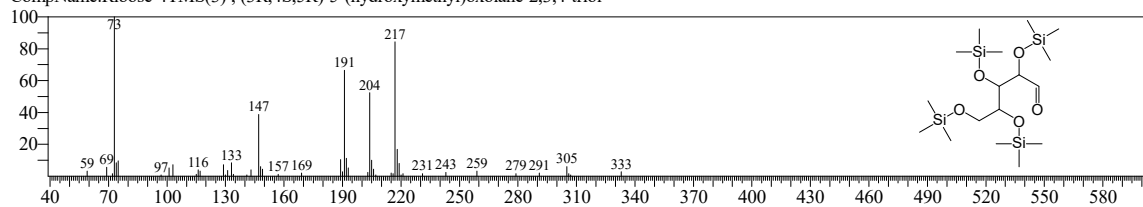

Hit#:2 Entry:210 Library:OA\_TMS\_DB5\_67min\_V3.lib

SI:32 Formula:C17H42O5Si4 CAS:10323-20-3 MolWeight:438 RetIndex:1634

CompName:Arabinose-4TMS(1) ; (2S,3R,4R)-2,3,4,5-tetrahydroxypentanal

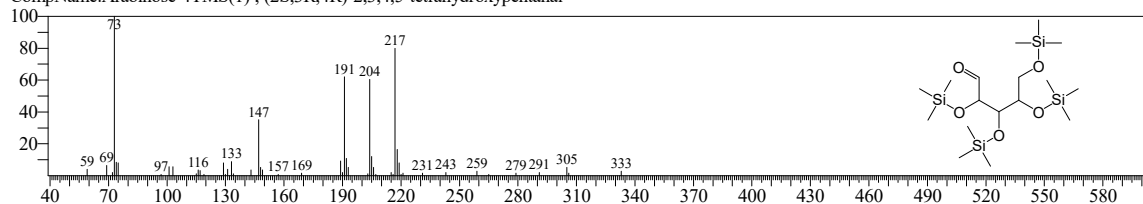

Hit#:3 Entry:205 Library:OA\_TMS\_DB5\_67min\_V3.lib

SI:30 Formula:C17H42O5Si4 CAS:1114-34-7 MolWeight:438 RetIndex:1624

CompName:Lyxose-4TMS(1) ; (2S,3S,4R)-2,3,4,5-tetrahydroxypentanal

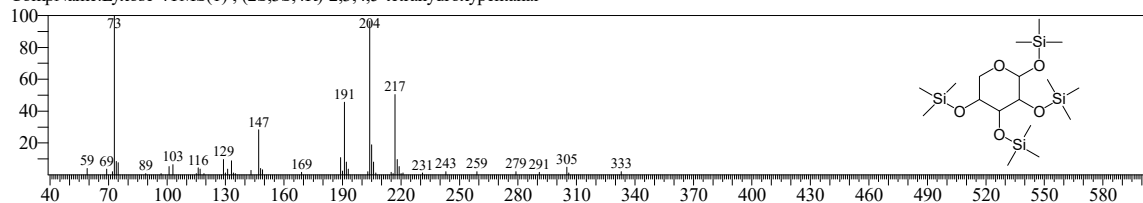

Hit#:4 Entry:295 Library:OA\_TMS\_DB5\_67min\_V3.lib

SI:30 Formula:C17H42O5Si4 CAS:58-86-6 MolWeight:438 RetIndex:1784

CompName:Xylose-4TMS(2) ; (2R,3S,4R)-2,3,4,5-tetrahydroxypentanal

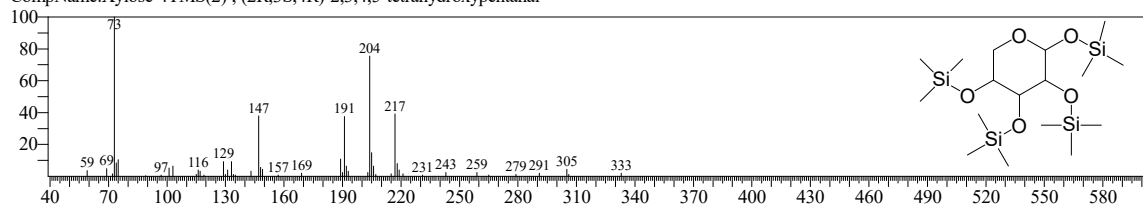

Hit#:5 Entry:196 Library:OA\_TMS\_DB5\_67min\_V3.lib

SI:29 Formula:C13H28O4Si2 CAS:111-16-0 MolWeight:304 RetIndex:1605

CompName:Pimelic acid-2TMS ; heptanedioic acid

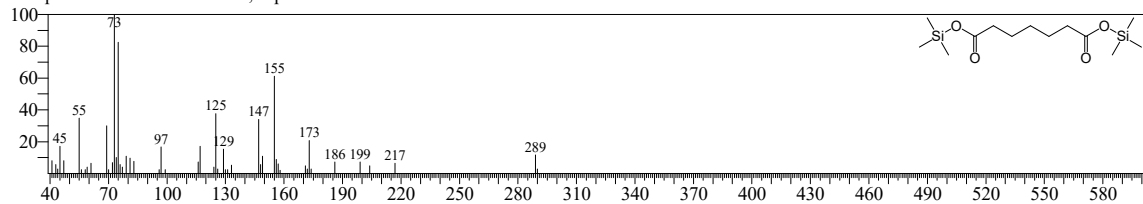

Supplement: Supplementary file 20 [file supplementary]
