# Supplementary material for: Comparative Metabolomics Profiling Reveals Key Metabolites and Associated Pathways Regulating Tuber Dormancy in White Yam (<em>Dioscorea rotundata</em>)
Source: Preprints.org preprint supplement (doi:10.20944/preprints202303.0378.v1), 2023-03-21

# TNAU

## Sample Information

Analyzed by : Admin  
 Analyzed : 02-Sep-22 5:53:05 AM  
 Sample Type : Unknown  
 Level # : 1  
 Sample Name : Sample  
 Sample ID : 5-2  
 IS Amount : [1]=1  
 Sample Amount : 1  
 Dilution Factor : 1  
 Vial # : 6  
 Injection Volume : 2.00  
 Data File : D:\GCMS-8040NX\Sep 2022\Users\01.09.2022\01092022015.qgd  
 Org Data File : D:\GCMS-8040NX\Sep 2022\Users\01.09.2022\01092022015.qgd  
 Method File : D:\GCMS-8040NX\Sep 2022\Method\Scan\_methodfile.qgm  
 Org Method File : D:\GCMS-8040NX\Sep 2022\Method\Scan\_methodfile.qgm  
 Report File :  
 Tuning File : D:\GCMS-8040NX\Aug 2022\Tuning Data\TUNING 25082022.qgt  
 Modified by : Admin  
 Modified : 05-Sep-22 11:02:35 AM

Chromatogram Sample D:\GCMS-8040NX\Sep 2022\Users\01.09.2022\01092022015.qgd

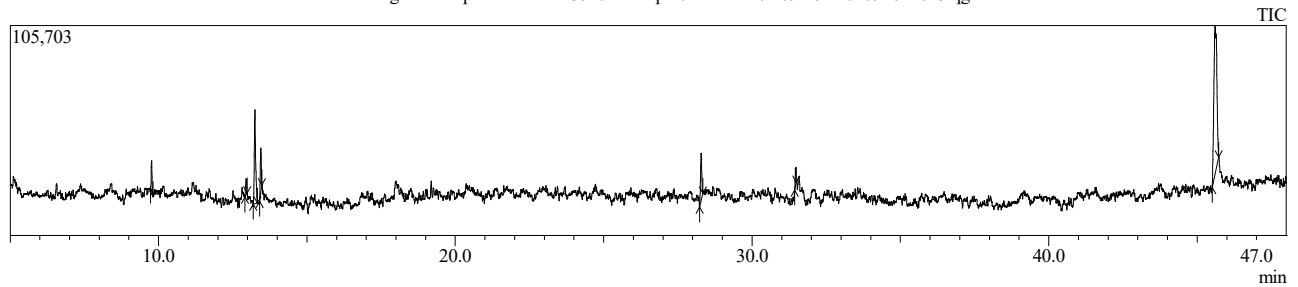

Peak Report TIC

| Peak# | R.Time | Area   | Area%  | Height | Height% | A/H  | Similarity | Name                             |
|-------|--------|--------|--------|--------|---------|------|------------|----------------------------------|
| 1     | 9.767  | 31721  | 3.66   | 15733  | 7.82    | 2.02 | 94         | Pentasiloxane, dodecamethyl-     |
| 2     | 12.951 | 19476  | 2.25   | 8088   | 4.02    | 2.41 | 70         | Morpholine, 4-methyl-, 4-oxide   |
| 3     | 13.248 | 151318 | 17.45  | 47273  | 23.50   | 3.20 | 52         | Methyl cis-13,16-Docosadienate   |
| 4     | 13.445 | 56349  | 6.50   | 22687  | 11.28   | 2.48 | 53         | Methyl cis-13,16-Docosadienate   |
| 5     | 28.284 | 68714  | 7.92   | 23649  | 11.75   | 2.91 | 93         | n-Hexadecanoic acid              |
| 6     | 31.466 | 15588  | 1.80   | 9247   | 4.60    | 1.69 | 88         | 9,12-Octadecadienoic acid (Z,Z)- |
| 7     | 45.607 | 524027 | 60.43  | 74507  | 37.03   | 7.03 | 88         | Diosgenin                        |
|       |        | 867193 | 100.00 | 201184 | 100.00  |      |            |                                  |

Library

# TNAU

<< Target >>

Line#:1 R.Time:9.765(Scan#:954) MassPeaks:336  
RawMode:Averaged 9.760-9.770(953-955) BasePeak:281.05(3609)  
BG Mode:Calc. from Peak Group 1 - Event 1 Q3 Scan

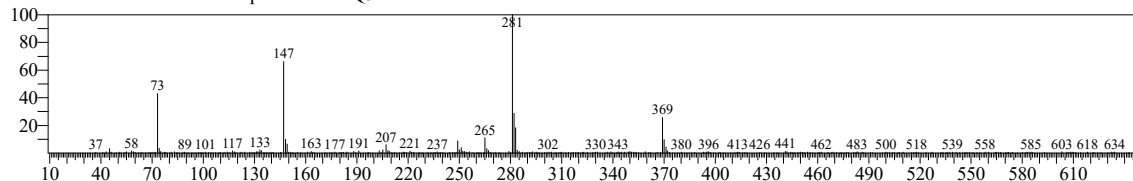

Hit#:1 Entry:40975 Library:NIST20R.lib

SI:94 Formula:C<sub>12</sub>H<sub>36</sub>O<sub>4</sub>Si<sub>5</sub> CAS:141-63-9 MolWeight:384 RetIndex:1068

CompName:Pentasiloxane, dodecamethyl- \$\$ Dodecamethylpentasiloxane \$\$ 1,1,1,3,3,5,5,7,7,9,9-Dodecamethylpentasiloxane #

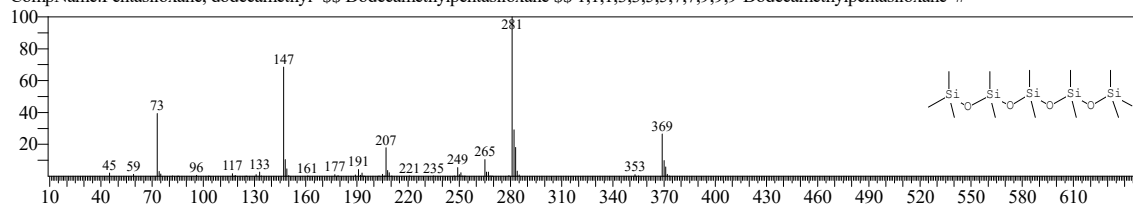

Hit#:2 Entry:249272 Library:NIST20M1.lib

SI:83 Formula:C<sub>12</sub>H<sub>36</sub>O<sub>4</sub>Si<sub>5</sub> CAS:3555-47-3 MolWeight:384 RetIndex:1068

CompName:Trisiloxane, 1,1,1,5,5,5-hexamethyl-3,3-bis[(trimethylsilyl)oxy]- \$\$ Tetrakis(trimethylsiloxy)silane \$\$ Trisiloxane, 1,1,1,5,5,5-hexamethyl-3,3-b

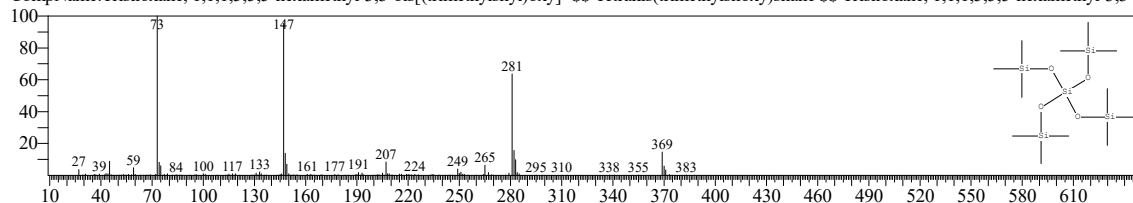

Hit#:3 Entry:27848 Library:NIST20M2.lib

SI:79 Formula:C<sub>18</sub>H<sub>48</sub>O<sub>4</sub>Si<sub>5</sub> CAS:0-00-0 MolWeight:468 RetIndex:1495

CompName:1,3,5,7,9-Pentasiloxane, 1,1,3,3,5,5,7,7,9,9-decamethyl-1,9-di(tert.butyl)-

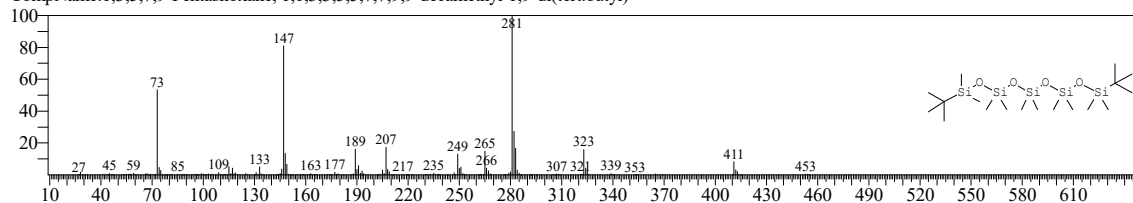

Hit#:4 Entry:249271 Library:NIST20M1.lib

SI:78 Formula:C<sub>12</sub>H<sub>36</sub>O<sub>4</sub>Si<sub>5</sub> CAS:38146-99-5 MolWeight:384 RetIndex:1068

CompName:1,1,1,3,5,5,7,7-Nonamethyl-3-(trimethylsiloxy)tetrasiloxane \$\$ 1,1,1,3,3,5,5,7,7-Nonamethyl-5-[(trimethylsilyl)oxy]tetrasiloxane #

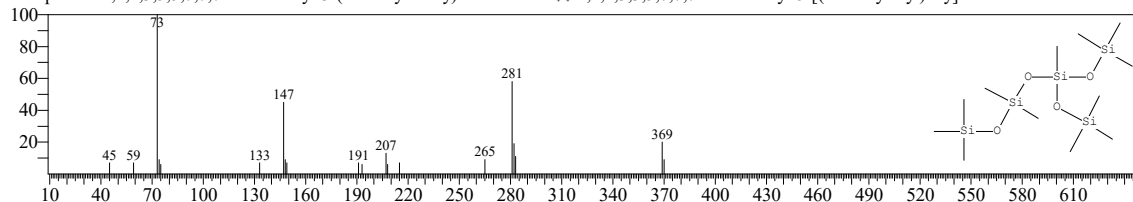

Hit#:5 Entry:158097 Library:NIST20M1.lib

SI:76 Formula:C<sub>14</sub>H<sub>24</sub>O<sub>3</sub>Si<sub>2</sub> CAS:0-00-0 MolWeight:296 RetIndex:1625

CompName:2,6-Dihydroxyacetophenone, 2TMS derivative \$\$ 2',6'-Dihydroxyacetophenone, bis(trimethylsilyl) ether

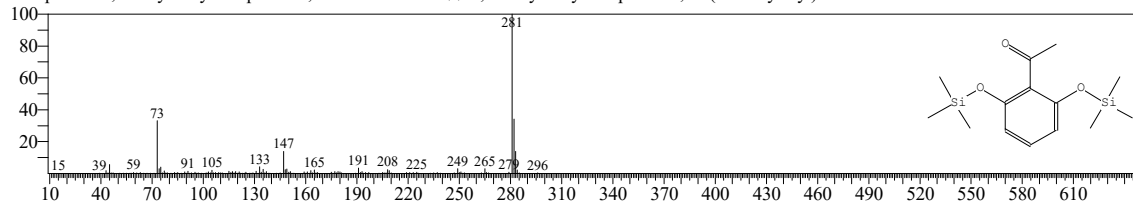

# TNAU

<< Target >>

Line#2 R.Time:12.950(Scan#:1591) MassPeaks:315

RawMode:Averaged 12.945-12.955(1590-1592) BasePeak:146.10(877)

BG Mode:Calc. from Peak Group 1 - Event 1 Q3 Scan

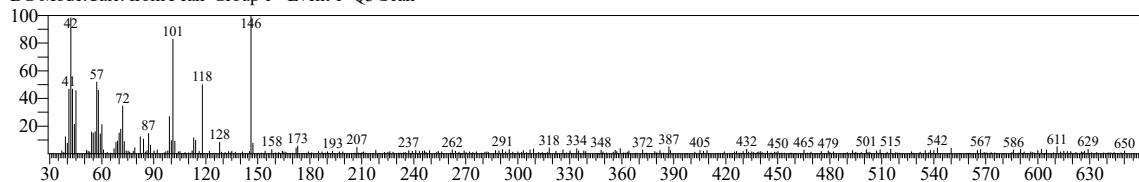

Hit#1 Entry:5109 Library:NIST20M1.lib

SI:70 Formula:C5H11NO2 CAS:7529-22-8 MolWeight:117 RetIndex:0

CompName:Morpholine, 4-methyl-, 4-oxide \$\$\$\$ 4-Methylmorpholine 4-oxide \$\$\$\$ N-Methylmorpholine N-oxide \$\$\$\$ N-Methylmorpholine 4-oxide \$\$\$\$ N-Methy

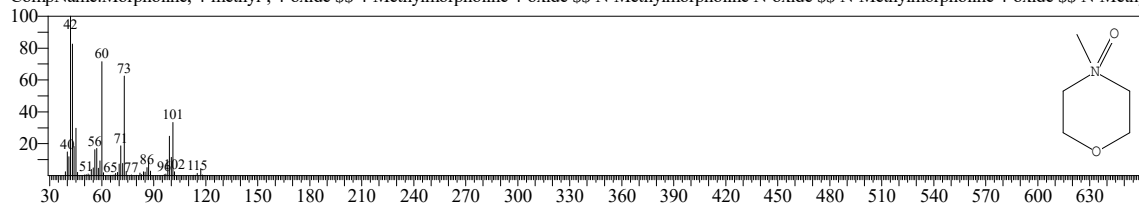

Hit#2 Entry:139 Library:OA\_TMS\_DB5\_67min\_V3.lib

SI:49 Formula:C10H21NO3Si CAS:16284-60-9 MolWeight:231 RetIndex:1487

CompName:Isovalerylglycine-TMS ; 2-(3-methylbutanoylamino)acetic acid

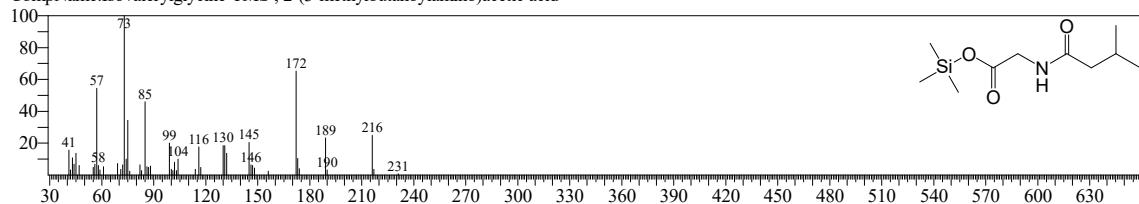

Hit#3 Entry:1 Library:FA\_ME\_SP2560\_EI\_V3.lib

SI:48 Formula:C5H10O2 CAS:107-92-6 MolWeight:102 RetIndex:1113

CompName:Methyl butanoate ; Butanoic acid

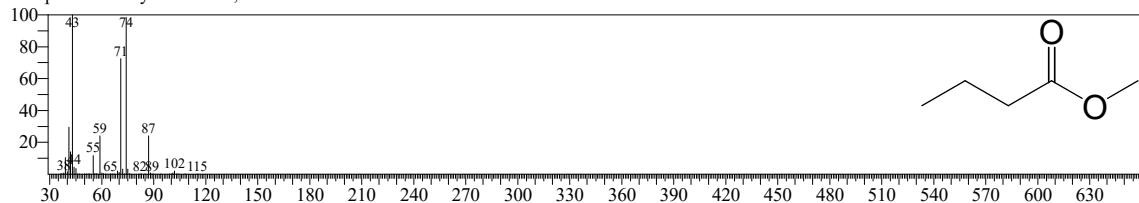

Hit#4 Entry:2 Library:OA\_TMS\_DB5\_67min\_V3.lib

SI:45 Formula:C6H13NO3Si CAS:298-12-4 MolWeight:175 RetIndex:990

CompName:Glyoxylic acid-meto-TMS ; oxaldehydic acid

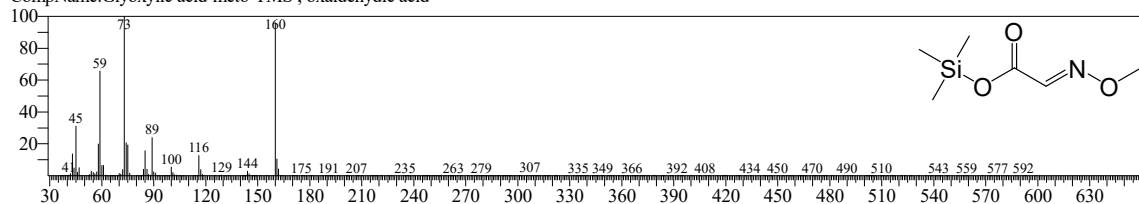

Hit#5 Entry:1 Library:OA\_TMS\_DB5\_67min\_V3.lib

SI:45 Formula:C7H17NO2Si CAS:1118-68-9 MolWeight:175 RetIndex:990

CompName:Dimethylglycine-TMS ; 2-(dimethylamino)acetic acid

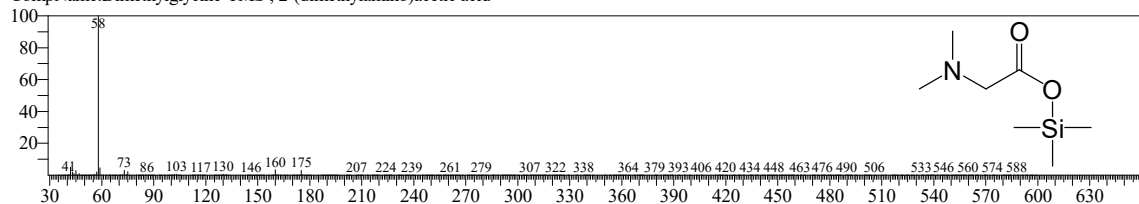

# TNAU

<< Target >>

Line#:3 R.Time:13.245(Scan#:1650) MassPeaks:435

RawMode:Averaged 13.240-13.250(1649-1651) BasePeak:155.10(7036)

BG Mode:Calc. from Peak Group 1 - Event 1 Q3 Scan

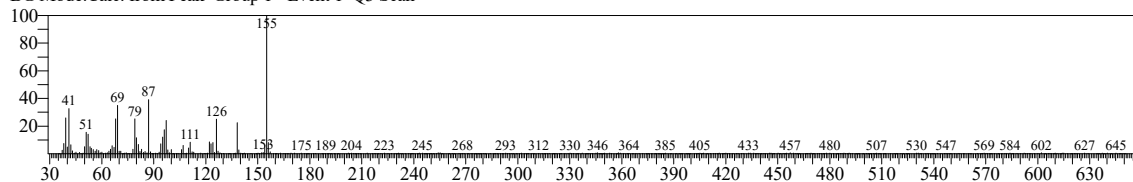

Hit#:1 Entry:34 Library:FA\_ME\_SP2560\_EI\_V3.lib

SI:52 Formula:C23H42O2 CAS:7370-49-2 MolWeight:350 RetIndex:3169

CompName:Methyl cis-13,16-Docosadienate ; (13Z,16E)-docosa-13,16-dienoic acid

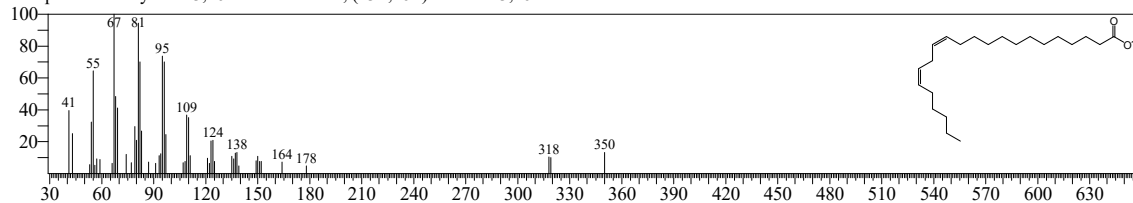

Hit#:2 Entry:11 Library:FA\_ME\_SP2560\_EI\_V3.lib

SI:51 Formula:C16H30O2 CAS:84743-29-3 MolWeight:254 RetIndex:2388

CompName:Methyl cis-10-pentadecenoate ; (Z)-pentadec-10-enoic acid

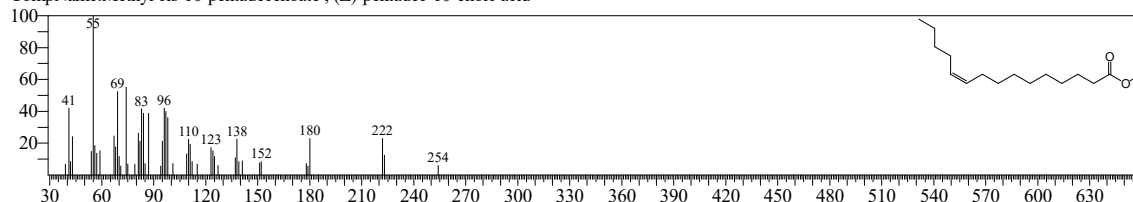

Hit#:3 Entry:21 Library:FA\_ME\_SP2560\_EI\_V3.lib

SI:50 Formula:C19H34O2 CAS:60-33-3 MolWeight:294 RetIndex:2775

CompName:Methyl linoleate ; Octadeca-9,12-dienoic acid

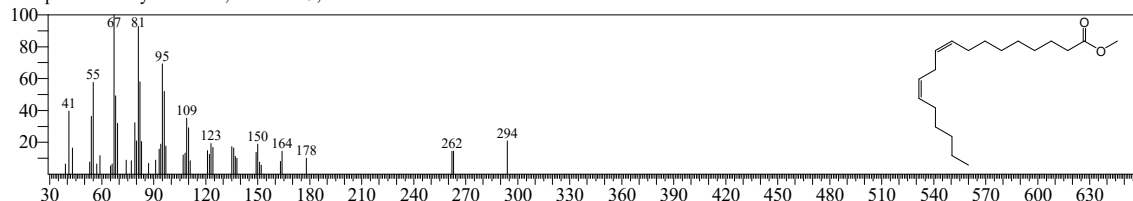

Hit#:4 Entry:20 Library:FA\_ME\_SP2560\_EI\_V3.lib

SI:50 Formula:C19H34O2 CAS:506-21-8 MolWeight:294 RetIndex:2727

CompName:Methyl linoleate ; (9E,12E)-octadeca-9,12-dienoic acid

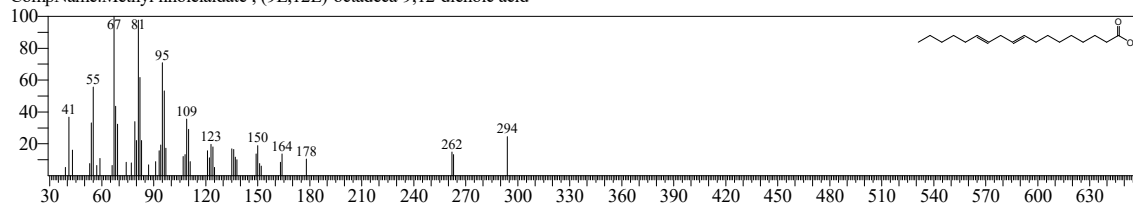

Hit#:5 Entry:9 Library:FA\_ME\_SP2560\_EI\_V3.lib

SI:49 Formula:C15H28O2 CAS:544-64-9 MolWeight:240 RetIndex:2283

CompName:Methyl myristoleate ; (Z)-tetradec-9-enoic acid

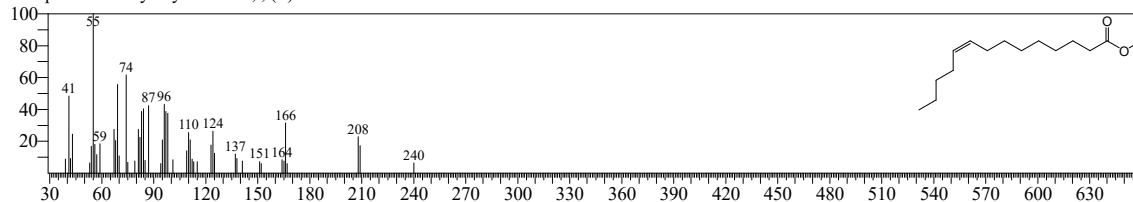

# TNAU

<< Target >>

Line#:4 R.Time:13.445(Scan#:1690) MassPeaks:361

RawMode:Averaged 13.440-13.450(1689-1691) BasePeak:155.10(3563)

BG Mode:Calc. from Peak Group 1 - Event 1 Q3 Scan

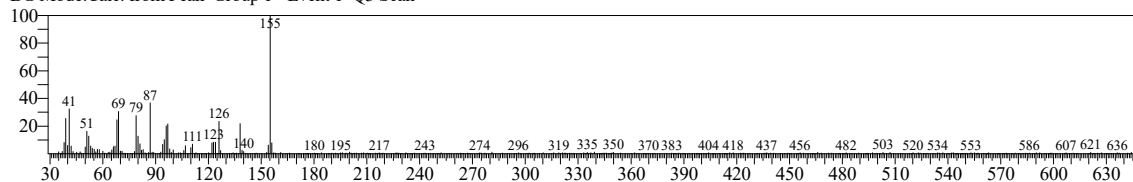

Hit#:1 Entry:34 Library:FA\_ME\_SP2560\_EI\_V3.lib

SI:53 Formula:C23H42O2 CAS:7370-49-2 MolWeight:350 RetIndex:3169

CompName:Methyl cis-13,16-Docosadienate ; (13Z,16E)-docosa-13,16-dienoic acid

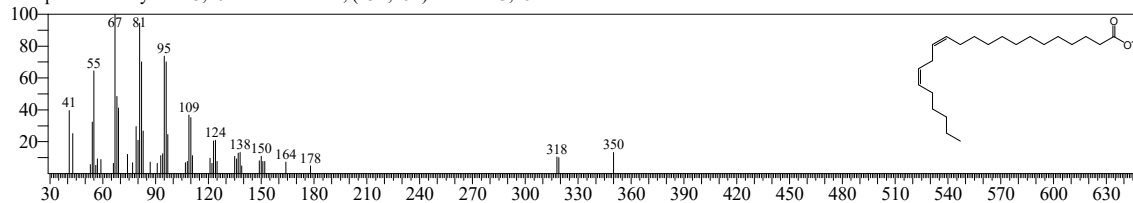

Hit#:2 Entry:21 Library:FA\_ME\_SP2560\_EI\_V3.lib

SI:52 Formula:C19H34O2 CAS:60-33-3 MolWeight:294 RetIndex:2775

CompName:Methyl linoleate ; Octadeca-9,12-dienoic acid

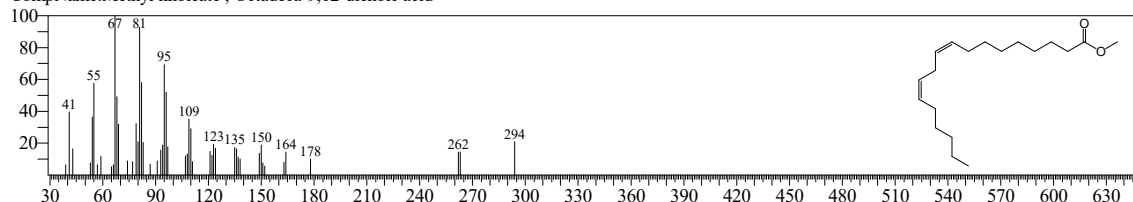

Hit#:3 Entry:20 Library:FA\_ME\_SP2560\_EI\_V3.lib

SI:51 Formula:C19H34O2 CAS:506-21-8 MolWeight:294 RetIndex:2727

CompName:Methyl linolelaidate ; (9E,12E)-octadeca-9,12-dienoic acid

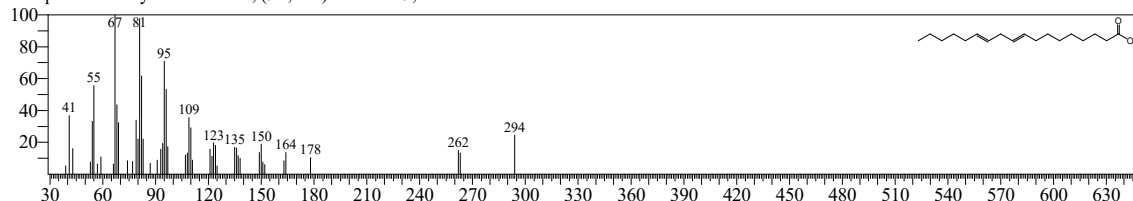

Hit#:4 Entry:27 Library:FA\_ME\_SP2560\_EI\_V3.lib

SI:51 Formula:C21H38O2 CAS:2091-39-6 MolWeight:322 RetIndex:2973

CompName:Methyl cis-11,14-Icosadienoate ; Icosa-11,14-dienoic acid

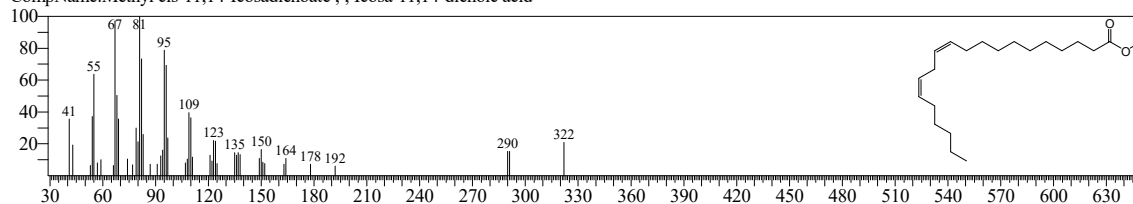

Hit#:5 Entry:11 Library:FA\_ME\_SP2560\_EI\_V3.lib

SI:50 Formula:C16H30O2 CAS:84743-29-3 MolWeight:254 RetIndex:2388

CompName:Methyl cis-10-pentadecenoate ; (Z)-pentadec-10-enoic acid

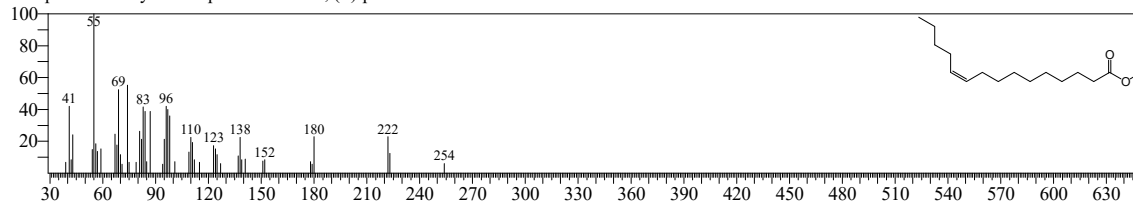

<< Target >>

RawMode:Averaged 28.280-28.290(4657-4659) BasePeak:73.05(1890)

BG Mode: Calc. from Peak Group 1 - Event 1 Q3 Scan

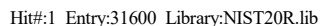

SI:93 Formula:C16H32O2 CAS:57-10-3 MolWeight:256 RetIndex:1968

CompName:n-Hexadecanoic acid \$\$ Hexadecanoic acid \$\$ n-Hexadecoic acid \$\$ Palmitic acid \$\$ Pentadecanecarboxylic acid \$\$ 1-Pentadecanecarboxylic

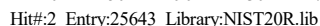

SI:89 Formula:C13H26O2 CAS:638-53-9 MolWeight:214 RefIndex:1670

CompName:Tridecanoic acid \$\$ n-Tridecanoic acid \$\$ n-Tridecoic acid \$\$ Tridecylic acid

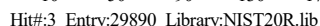

SI:88 Formula:C15H30O2 CAS:1002-84-2 MolWeight:242 RetIndex:1869

CompName:Pentadecanoic acid \$\$ Pentadecylic acid \$\$ n-Pentadecanoic acid \$\$ n-Pentadecylic acid

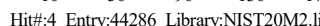

SI:88 Formula:C38H68O8 CAS:28474-90-0 MolWeight:652 RetIndex:4765

CompName:l-(+)-Ascorbic acid 2,6-dihexadecanoate

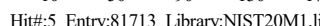

SI:87 Formula:C14H28O2 CAS:544-63-8 MolWeight:228 RefIndex:1769

CompName:Tetradecanoic acid \$\$ Myristic acid \$\$ n-Tetradecanoic acid \$\$ n-Tetradecoic acid \$\$ Neo-Fat 14 \$\$ Univol U 316S \$\$ 1-Tridecanecarboxylic acid

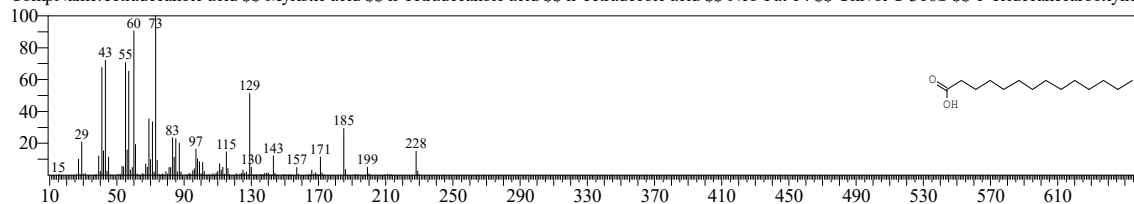

# TNAU

<< Target >>

Line#6 R.Time:31.465(Scan#:5294) MassPeaks:357

RawMode:Averaged 31.460-31.470(5293-5295) BasePeak:67.05(813)

BG Mode:Calc. from Peak Group 1 - Event 1 Q3 Scan

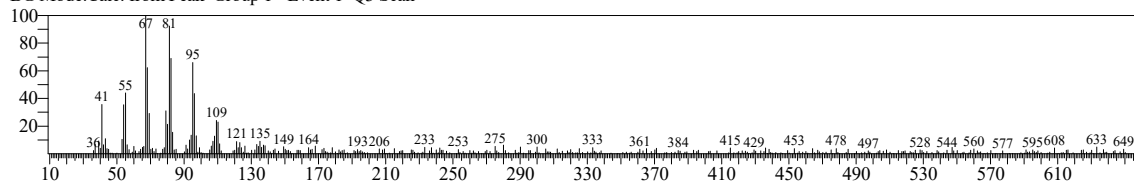

Hit#1 Entry:34035 Library:NIST20R.lib

SI:88 Formula:C18H32O2 CAS:60-33-3 MolWeight:280 RetIndex:2183

CompName:9,12-Octadecadienoic acid (Z,Z)- \$\$ cis-9,cis-12-Octadecadienoic acid \$\$ cis,cis-Linoleic acid \$\$ Grape seed oil \$\$ Linoleic acid \$

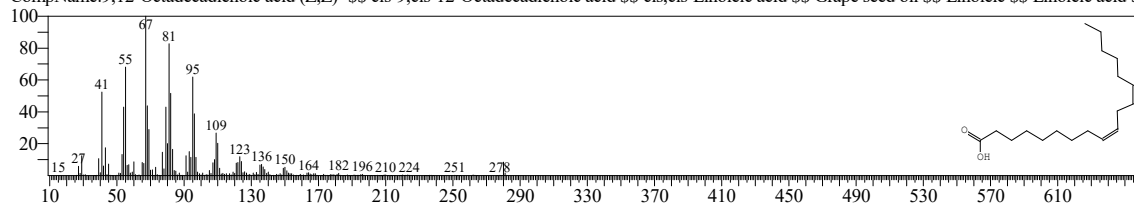

Hit#2 Entry:139646 Library:NIST20M1.lib

SI:88 Formula:C18H32O2 CAS:2420-56-6 MolWeight:280 RetIndex:2183

CompName:10E,12Z-Octadecadienoic acid

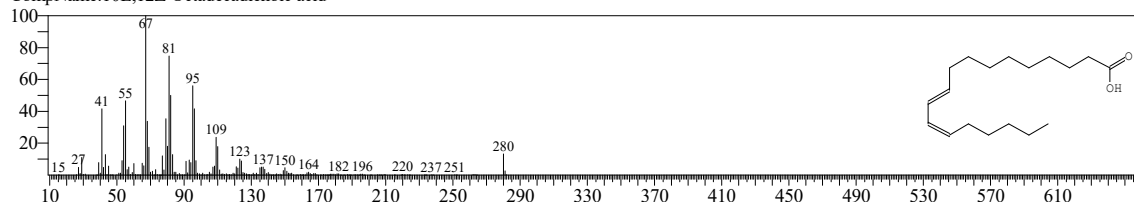

Hit#3 Entry:173215 Library:NIST20M1.lib

SI:88 Formula:C20H36O2 CAS:2091-39-6 MolWeight:308 RetIndex:2382

CompName:11,14-Eicosadienoic acid

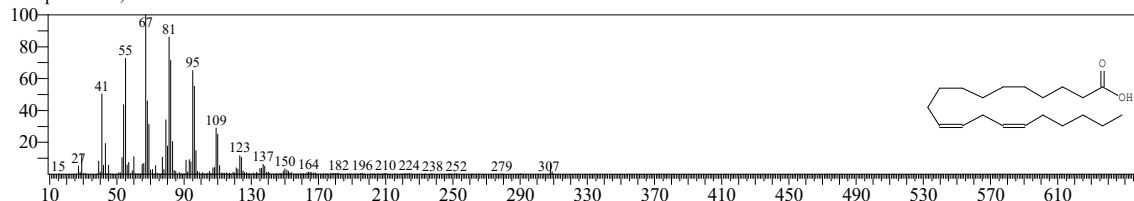

Hit#4 Entry:139651 Library:NIST20M1.lib

SI:88 Formula:C18H32O2 CAS:544-71-8 MolWeight:280 RetIndex:2183

CompName:(9E,11E)-Octadecadienoic acid

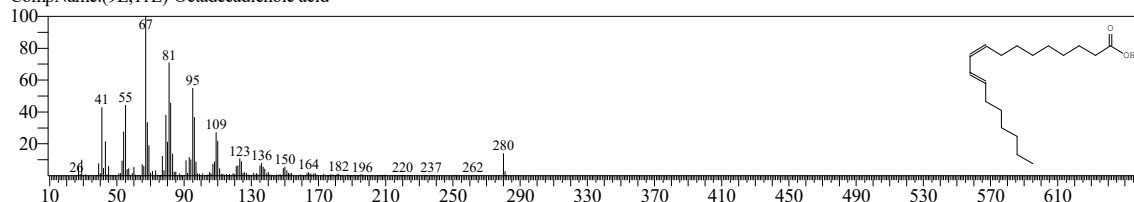

Hit#5 Entry:123400 Library:NIST20M1.lib

SI:86 Formula:C18H34O CAS:506-43-4 MolWeight:266 RetIndex:2069

CompName:9,12-Octadecadien-1-ol, (Z,Z)- \$\$ (9Z,12Z)-9,12-Octadecadien-1-ol # \$\$ (Z,Z)-9,12-Octadecadien-1-ol

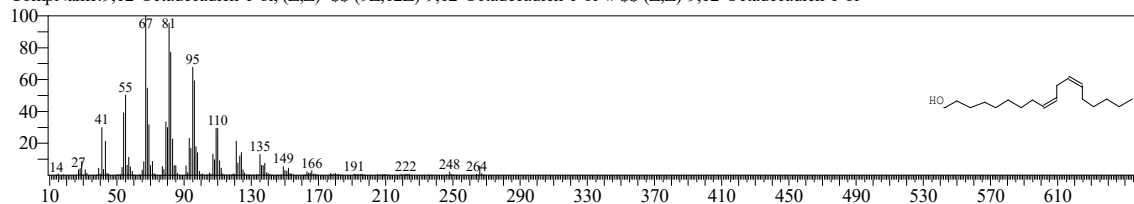

# TNAU

<< Target >>

Line#:7 R.Time:45.605(Scan#:8122) MassPeaks:454

RawMode:Averaged 45.600-45.610(8121-8123) BasePeak:139.10(7594)

BG Mode:Calc. from Peak Group 1 - Event 1 Q3 Scan

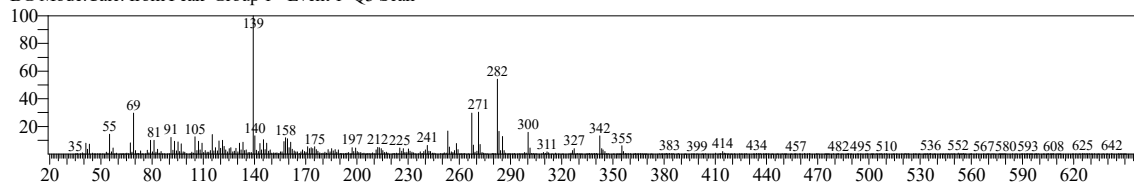

Hit#:1 Entry:8297 Library:NIST20M2.lib

SI:88 Formula:C27H42O3 CAS:512-04-9 MolWeight:414 RetIndex:2844

CompName:Diosgenin \$\$ Spirost-5-en-3-ol, (3.beta.,25R)- \$\$ Spirost-5-en-3.beta.-ol, (25R)- \$\$ Nitrogenin \$\$ 25D-spirost-5-en-3.beta.-ol \$\$ Spiro(8H-naph

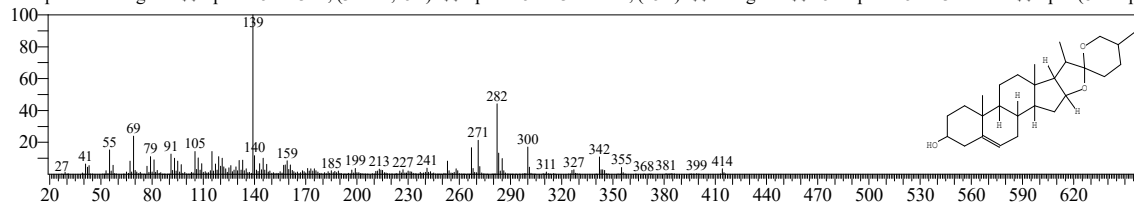

Hit#:2 Entry:14852 Library:NIST20M2.lib

SI:80 Formula:C28H44O3 CAS:116292-24-1 MolWeight:428 RetIndex:2793

CompName:Diosgenin methyl ether \$\$ Diosgenin Me derivative \$\$ (3.beta.,25R)-3-Methoxyspirost-5-ene \$\$ Spirost-5-ene, 3-methoxy-, (3.beta.,25R)-

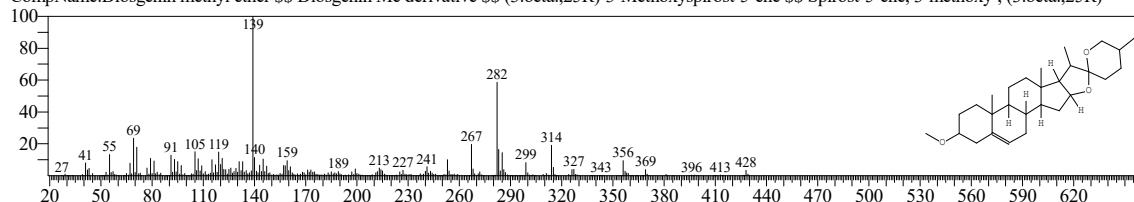

Hit#:3 Entry:24878 Library:NIST20M2.lib

SI:79 Formula:C29H44O4 CAS:1061-54-7 MolWeight:456 RetIndex:2984

CompName:Spirost-5-en-3-ol, acetate, (3.beta.,25R)- \$\$ Diosgenin acetate \$\$ Spirost-5-en-3.beta.-ol, acetate, (25R)- \$\$ Spirost-5-en-3.beta.-ol, acetate, (2-

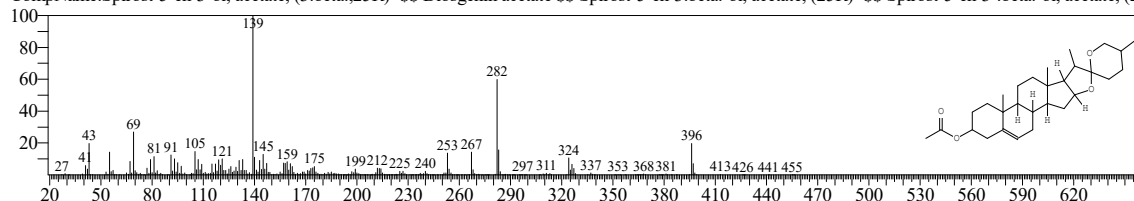

Hit#:4 Entry:41561 Library:NIST20R.lib

SI:78 Formula:C27H42O2 CAS:32277-73-9 MolWeight:398 RetIndex:2713

CompName:Des-N-solasodine \$\$ Furosta-5,20(22)-dien-3-ol #

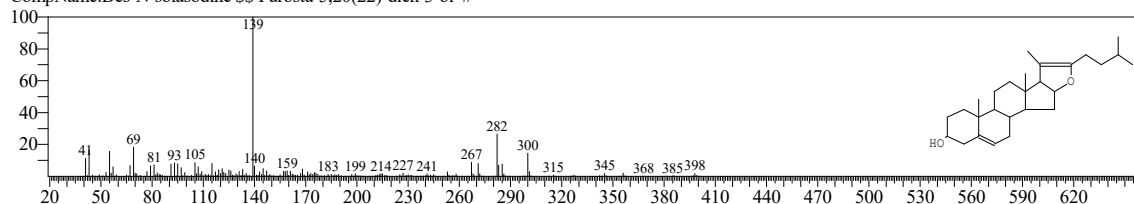

Hit#:5 Entry:42677 Library:NIST20R.lib

SI:73 Formula:C29H44O4 CAS:1180-12-7 MolWeight:456 RetIndex:2984

CompName:Neodiosgenin (3.beta.,25S) acetate \$\$ Spirost-5-en-3-ol, 3-acetate, (3.beta.,25S)- \$\$ Spirost-5-en-3-ol, acetate, (3.beta.,25S)- \$\$ Spirost-5-en-3-

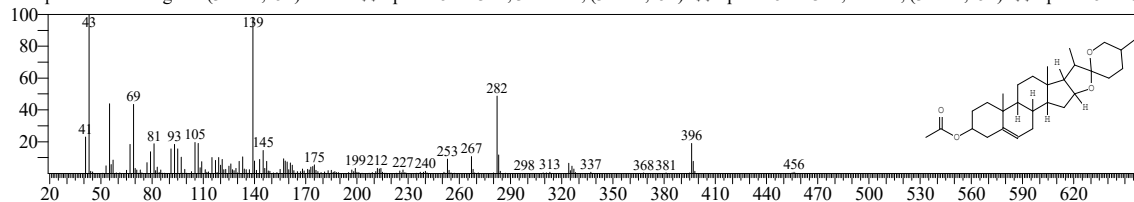

Supplement: Supplementary file 21 [file supplementary]
