# Supplementary material for: Comparative Metabolomics Profiling Reveals Key Metabolites and Associated Pathways Regulating Tuber Dormancy in White Yam (<em>Dioscorea rotundata</em>)
Source: Preprints.org preprint supplement (doi:10.20944/preprints202303.0378.v1), 2023-03-21

# TNAU

## Sample Information

Analyzed by : Admin  
 Analyzed : 02-Sep-22 11:28:40 PM  
 Sample Type : Unknown  
 Level # : 1  
 Sample Name : Sample  
 Sample ID : 12-1  
 IS Amount : [1]=1  
 Sample Amount : 1  
 Dilution Factor : 1  
 Vial # : 13  
 Injection Volume : 5.00  
 Data File : D:\GCMS-8040NX\Sep 2022\Users\01.09.2022\01092022035.qgd  
 Org Data File : D:\GCMS-8040NX\Sep 2022\Users\01.09.2022\01092022035.qgd  
 Method File : D:\GCMS-8040NX\Sep 2022\Method\Scan\_methodfile.qgm  
 Org Method File : D:\GCMS-8040NX\Sep 2022\Method\Scan\_methodfile.qgm  
 Report File :  
 Tuning File : D:\GCMS-8040NX\Aug 2022\Tuning Data\TUNING 25082022.qgt  
 Modified by : Admin  
 Modified : 05-Sep-22 11:12:25 AM

Chromatogram Sample D:\GCMS-8040NX\Sep 2022\Users\01.09.2022\01092022035.qgd

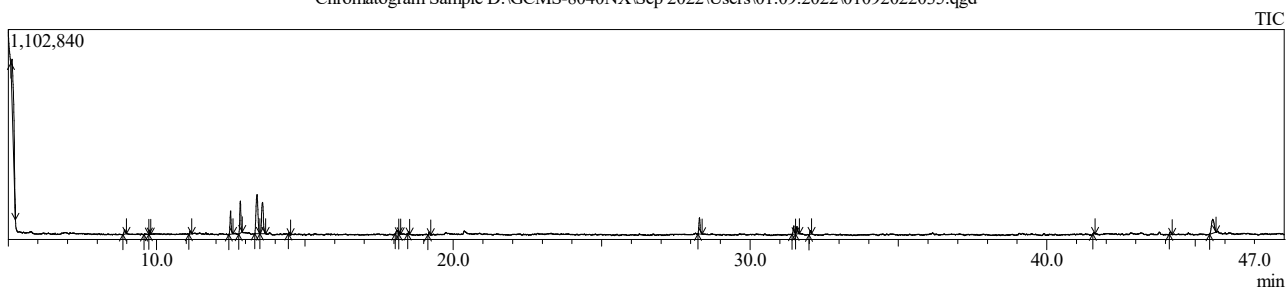

## Peak Report TIC

| Peak# | R.Time | Area    | Area%  | Height  | Height% | A/H  | Similarity | Name                                    |
|-------|--------|---------|--------|---------|---------|------|------------|-----------------------------------------|
| 1     | 5.128  | 1419450 | 27.18  | 200238  | 15.83   | 7.09 | 98         | Pyridine                                |
| 2     | 8.920  | 74047   | 1.42   | 23638   | 1.87    | 3.13 | 84         | 1-Butanol, 3-methyl-, acetate           |
| 3     | 9.590  | 21318   | 0.41   | 4764    | 0.38    | 4.47 | 15         | Methyl arachidonate                     |
| 4     | 9.767  | 45044   | 0.86   | 21712   | 1.72    | 2.07 | 93         | Pentasiloxane, dodecamethyl-            |
| 5     | 11.133 | 44621   | 0.85   | 14143   | 1.12    | 3.15 | 40         | Methyl arachidonate                     |
| 6     | 12.493 | 322045  | 6.17   | 121576  | 9.61    | 2.65 | 73         | 2,5-Cyclohexadiene-1,4-dione, dioxime   |
| 7     | 12.822 | 430117  | 8.24   | 169559  | 13.41   | 2.54 | 74         | 1,3-Benzodioxol-5-ol                    |
| 8     | 13.386 | 924094  | 17.69  | 205551  | 16.25   | 4.50 | 53         | Methyl cis-13,16-Docosadienate          |
| 9     | 13.569 | 687942  | 13.17  | 165731  | 13.10   | 4.15 | 53         | Methyl cis-13,16-Docosadienate          |
| 10    | 14.471 | 18022   | 0.35   | 9113    | 0.72    | 1.98 | 74         | 2,3-Dimethyl-para-anisaldehyde          |
| 11    | 18.112 | 84271   | 1.61   | 16746   | 1.32    | 5.03 | 93         | .beta.-D-Glucopyranose, 1,6-anhydro-    |
| 12    | 18.205 | 15825   | 0.30   | 5922    | 0.47    | 2.67 | 12         | Glutamic acid-3TMS                      |
| 13    | 18.494 | 21042   | 0.40   | 11550   | 0.91    | 1.82 | 90         | 2,4-Di-tert-butylphenol                 |
| 14    | 19.192 | 36135   | 0.69   | 12989   | 1.03    | 2.78 | 86         | 2,4-Di-tert-butylphenoxytrimethylsilane |
| 15    | 28.295 | 245250  | 4.70   | 85502   | 6.76    | 2.87 | 94         | n-Hexadecanoic acid                     |
| 16    | 31.471 | 120484  | 2.31   | 43638   | 3.45    | 2.76 | 95         | 9,12-Octadecadienoic acid (Z,Z)-        |
| 17    | 31.582 | 128718  | 2.46   | 37981   | 3.00    | 3.39 | 86         | Z,Z-8,10-Hexadecadien-1-ol              |
| 18    | 32.032 | 52495   | 1.01   | 20709   | 1.64    | 2.53 | 91         | Octadecanoic acid                       |
| 19    | 41.592 | 23320   | 0.45   | 8764    | 0.69    | 2.66 | 80         | Tetracosamethyl-cyclododecasiloxane     |
| 20    | 44.164 | 37815   | 0.72   | 11834   | 0.94    | 3.20 | 89         | 13-Docosenamide, (Z)-                   |
| 21    | 45.594 | 470693  | 9.01   | 73080   | 5.78    | 6.44 | 91         | Diosgenin                               |
|       |        | 5222748 | 100.00 | 1264740 | 100.00  |      |            |                                         |

# TNAU

Library

<< Target >>

Line#:1 R.Time:5.130(Scan#:27) MassPeaks:275

RawMode:Averaged 5.125-5.135(26-28) BasePeak:79.05(86906)

BG Mode:Calc. from Peak Group 1 - Event 1 Q3 Scan

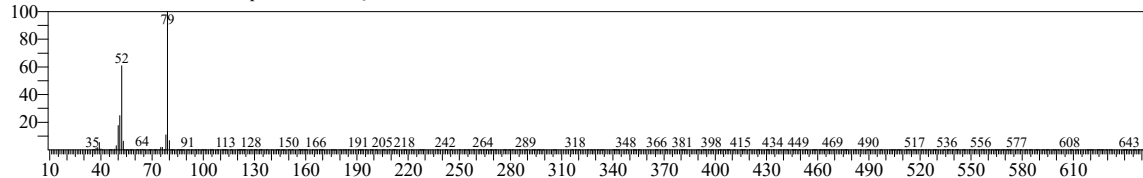

Hit#:1 Entry:498 Library:NIST20M1.lib

SI:98 Formula:C5H5N CAS:110-86-1 MolWeight:79 RetIndex:674

CompName:Pyridine \$\$ Azabenzene \$\$ Azine \$\$ NCI-C55301 \$\$ Piridina \$\$ Pirydyna \$\$ Pyridin \$\$ Rcra waste number U196 \$\$ UN 1282 \$\$ Pyr \$\$ CP :

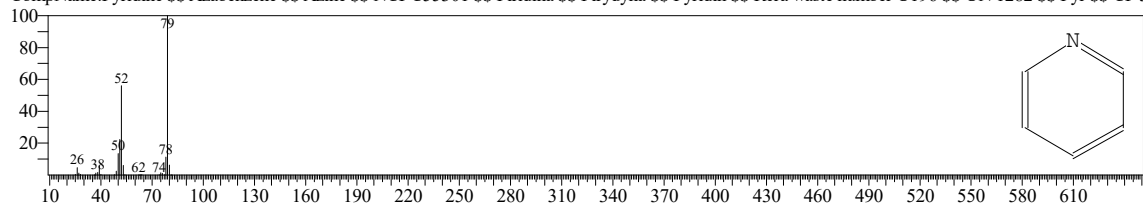

Hit#:2 Entry:6149 Library:NIST20M1.lib

SI:92 Formula:C6H5NO2 CAS:98-98-6 MolWeight:123 RetIndex:1144

CompName:2-Pyridinecarboxylic acid \$\$ Picolinic acid \$\$ .alpha.-Pyridinecarboxylic acid \$\$ o-Pyridinecarboxylic acid \$\$ 2-Carboxypyridine \$\$ 2-Picolinic

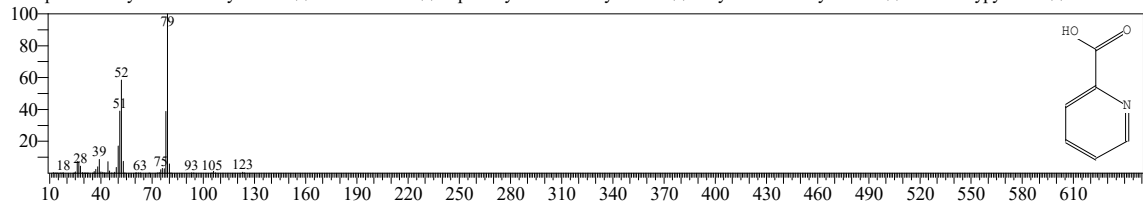

Hit#:3 Entry:2869 Library:NIST20M1.lib

SI:91 Formula:C6H5NO CAS:1121-60-4 MolWeight:107 RetIndex:976

CompName:2-Pyridinecarboxaldehyde \$\$ Picolinaldehyde \$\$ 2-Pyridinealdehyde \$\$ Pyridine-2-carboxaldehyde \$\$ Pyridine-2-aldehyde \$\$ 2-Pyridylaldehy

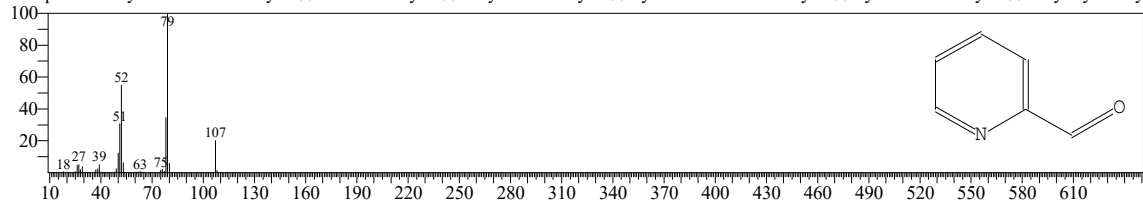

Hit#:4 Entry:1275 Library:NIST20M1.lib

SI:86 Formula:C5H8BN CAS:110-51-0 MolWeight:93 RetIndex:0

CompName:Boron, trihydro(pyridine)-, (T-4)- \$\$ Pyridine, compd. with borane (1:1) \$\$ Pyridine borane \$\$ Borane-pyridine complex \$\$ Boron, trihydro(py

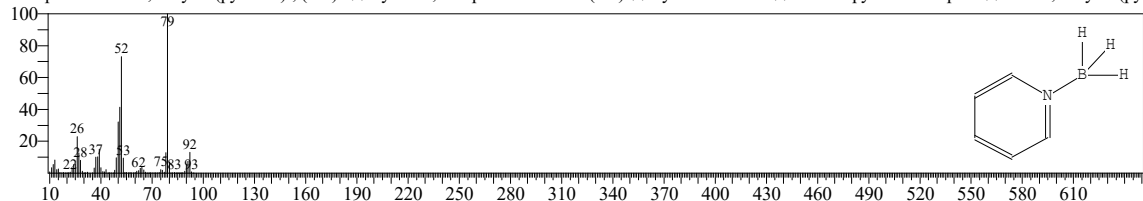

Hit#:5 Entry:5194 Library:NIST20R.lib

SI:85 Formula:C6H6N2O CAS:1452-77-3 MolWeight:122 RetIndex:1197

CompName:Picolinamide \$\$ Pyridine-2-carboxamide \$\$ .alpha.-Picolinamide \$\$ 2-Pyridinecarboxamide \$\$ .alpha.-Picolinic acid amide \$\$ Picolinic acid an

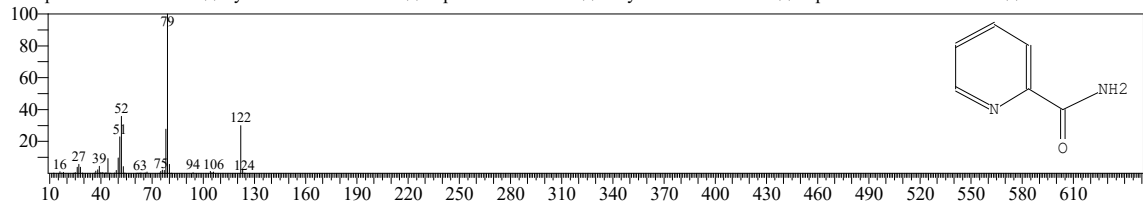

# TNAU

<< Target >>

Line#2 R.Time:8.920(Scan#:785) MassPeaks:419

RawMode:Averaged 8.915-8.925(784-786) BasePeak:43.05(4303)

BG Mode:Calc. from Peak Group 1 - Event 1 Q3 Scan

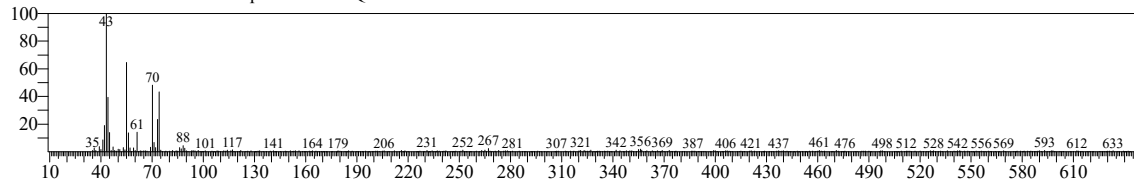

Hit#1 Entry:6784 Library:NIST20R.lib

SI:84 Formula:C7H14O2 CAS:123-92-2 MolWeight:130 RetIndex:820

CompName:1-Butanol, 3-methyl-, acetate \$\$ Isopentyl alcohol, acetate \$\$ Acetic acid, 3-methylbutyl ester \$\$ Banana oil \$\$ Isoamyl acetate \$\$ Isoamyl etha

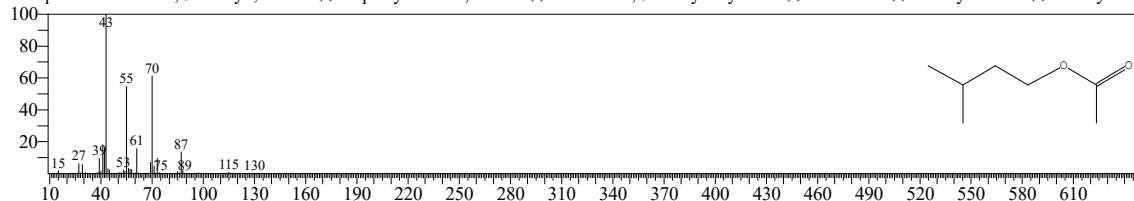

Hit#2 Entry:8685 Library:NIST20M1.lib

SI:81 Formula:C7H14O2 CAS:628-63-7 MolWeight:130 RetIndex:884

CompName:Acetic acid, pentyl ester \$\$ n-Amyl acetate \$\$ n-Pentyl acetate \$\$ Amyl acetate \$\$ Birnenöl \$\$ Pentyl acetate \$\$ Acetic acid, amyl ester \$\$ Arr

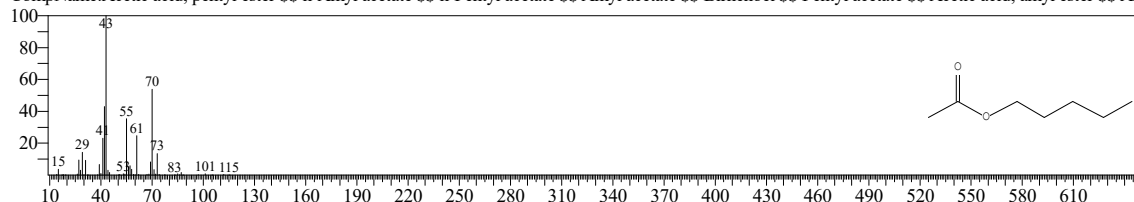

Hit#3 Entry:6819 Library:NIST20R.lib

SI:81 Formula:C7H14O2 CAS:624-41-9 MolWeight:130 RetIndex:820

CompName:1-Butanol, 2-methyl-, acetate \$\$ 2-Methyl-1-butyl acetate \$\$ 2-Methylbutyl acetate \$\$ Acetic acid 2-methylbutyl ester \$\$ 2-Methylbutyl acetate :

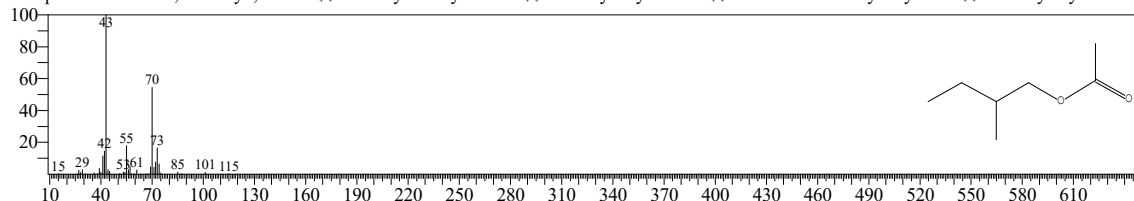

Hit#4 Entry:1220 Library:NIST20R.lib

SI:79 Formula:C4H8O2 CAS:590-90-9 MolWeight:88 RetIndex:798

CompName:CH3C(O)CH2CH2OH \$\$ Methylolacetone \$\$ Monomethylolacetone \$\$ 3-Ketobutan-1-ol \$\$ 3-Oxo-1-butanol \$\$ 3-Oxobutanol \$\$ 4-Butanol-100

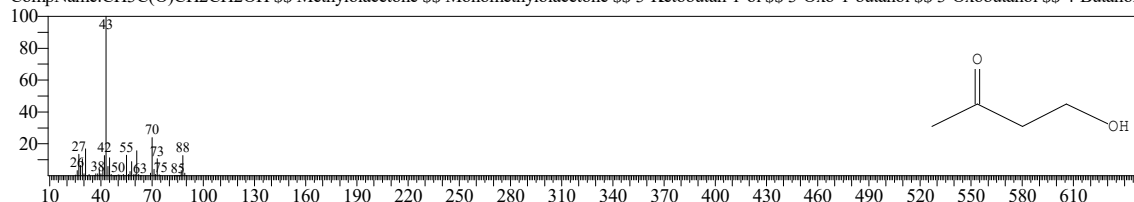

Hit#5 Entry:5225 Library:NIST20M1.lib

SI:79 Formula:C4H6O4 CAS:17675-99-9 MolWeight:118 RetIndex:1201

CompName:2-Furanone, 3,4-dihydroxytetrahydro \$\$ 3,4-Dihydroxydihydro-2(3H)-furanone #

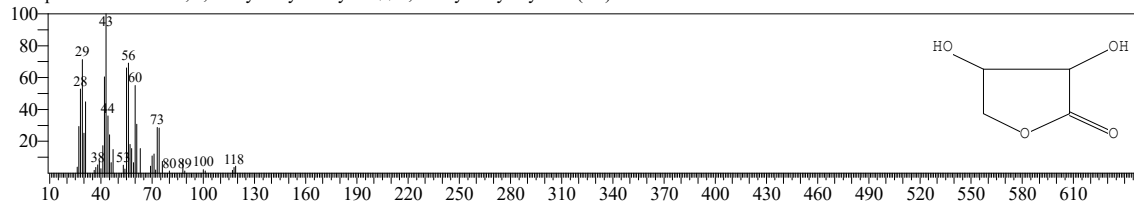

# TNAU

<< Target >>

Line#:3 R.Time:9.590(Scan#:919) MassPeaks:387

RawMode:Averaged 9.585-9.595(918-920) BasePeak:79.00(80)

BG Mode:Calc. from Peak Group 1 - Event 1 Q3 Scan

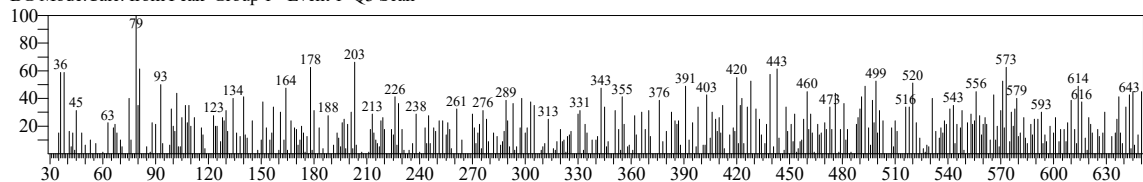

Hit#:1 Entry:33 Library:FA\_ME\_SP2560\_EI\_V3.lib

SI:15 Formula:C21H34O2 CAS:506-32-1 MolWeight:318 RetIndex:3109

CompName:Methyl arachidonate ; (5Z,8Z,11Z,14Z)-icosa-5,8,11,14-tetraenoic acid

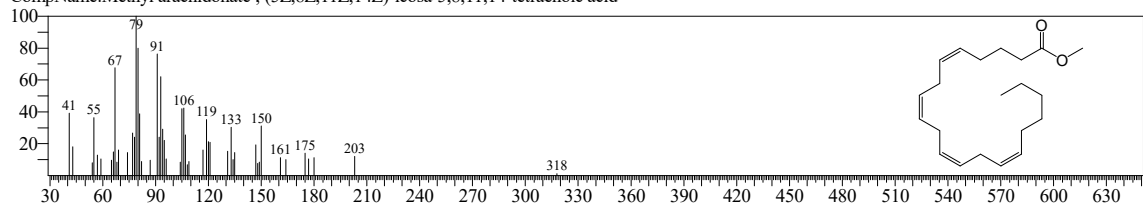

Hit#:2 Entry:534 Library:OA\_TMS\_DB5\_67min\_V3.lib

SI:14 Formula:C25H42O2Si CAS:24880-45-3 MolWeight:402 RetIndex:2591

CompName:Docosapentaenoic acid-TMS ; (7Z,10Z,13Z,16Z,19Z)-docosa-7,10,13,16,19-pentaenoic acid

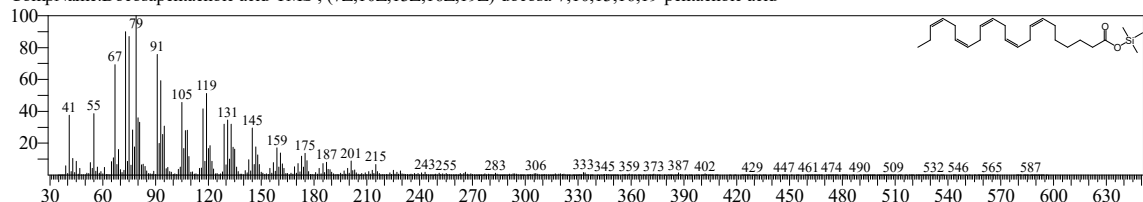

Hit#:3 Entry:509 Library:OA\_TMS\_DB5\_67min\_V3.lib

SI:14 Formula:C23H38O2Si CAS:10417-94-4 MolWeight:374 RetIndex:2389

CompName:Eicosapentaenoic acid-TMS ; icoso-5,8,11,14,17-pentaenoic acid

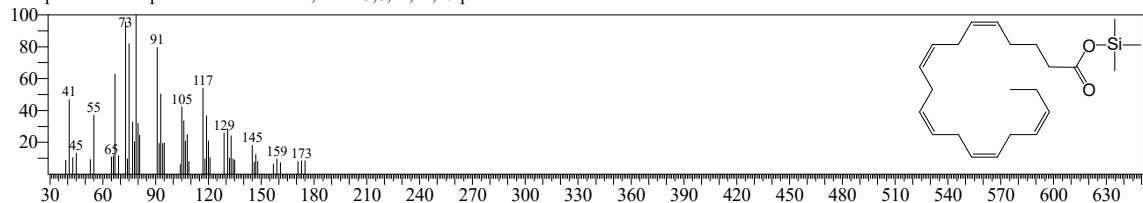

Hit#:4 Entry:31 Library:FA\_ME\_SP2560\_EI\_V3.lib

SI:14 Formula:C21H36O2 CAS:2091-27-2 MolWeight:320 RetIndex:3089

CompName:Methyl cis-11,14,17-Icosatrienoate ; Icosa-11,14,17-trienoic acid

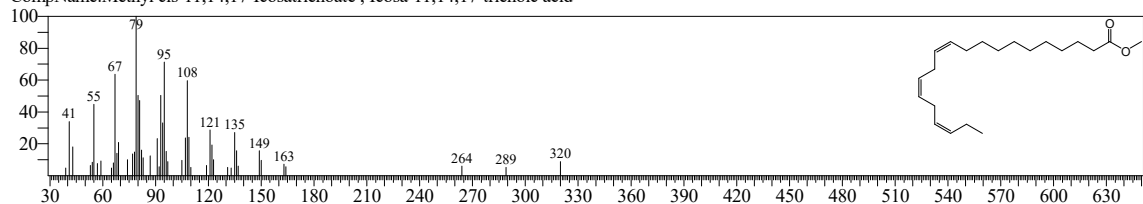

Hit#:5 Entry:25 Library:FA\_ME\_SP2560\_EI\_V3.lib

SI:13 Formula:C19H32O2 CAS:463-40-1 MolWeight:292 RetIndex:2892

CompName:Methyl linolenate ; (9Z,12Z,15Z)-octadeca-9,12,15-trienoic acid

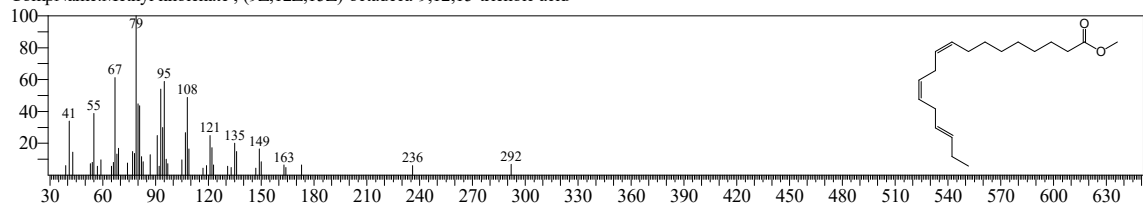

# TNAU

<< Target >>

Line#:4 R.Time:9.765(Scan#:954) MassPeaks:361

RawMode:Averaged 9.760-9.770(953-955) BasePeak:281.00(3993)

BG Mode:Calc. from Peak Group 1 - Event 1 Q3 Scan

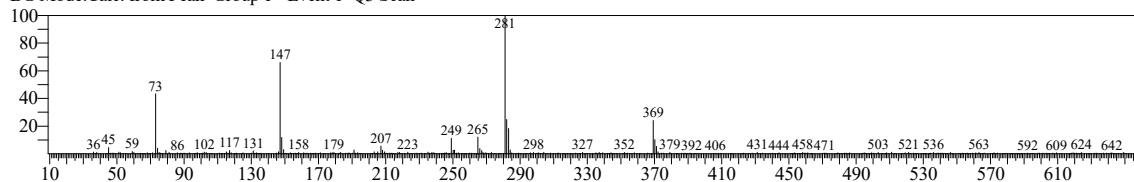

Hit#:1 Entry:40975 Library:NIST20R.lib

SI:93 Formula:C12H36O4Si5 CAS:141-63-9 MolWeight:384 RetIndex:1068

CompName:Pentasiloxane, dodecamethyl- \$\$ Dodecamethylpentasiloxane \$\$ 1,1,1,3,3,5,5,7,7,9,9-Dodecamethylpentasiloxane #

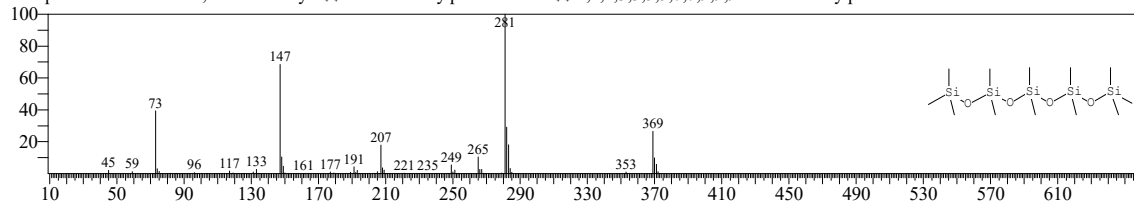

Hit#:2 Entry:249272 Library:NIST20M1.lib

SI:82 Formula:C12H36O4Si5 CAS:3555-47-3 MolWeight:384 RetIndex:1068

CompName:Trisiloxane, 1,1,1,5,5,5-hexamethyl-3,3-bis[(trimethylsilyl)oxy]- \$\$ Tetrakis(trimethylsiloxy)silane \$\$ Trisiloxane, 1,1,1,5,5,5-hexamethyl-3,3-b

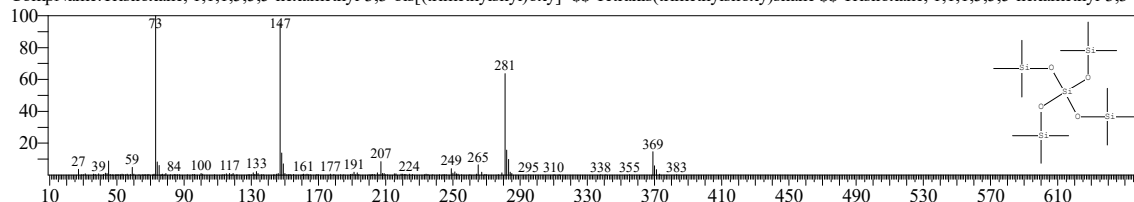

Hit#:3 Entry:27848 Library:NIST20M2.lib

SI:80 Formula:C18H48O4Si5 CAS:0-00-0 MolWeight:468 RetIndex:1495

CompName:1,3,5,7,9-Pentasiloxane, 1,1,3,3,5,5,7,7,9,9-decamethyl-1,9-di(tert.butyl)-

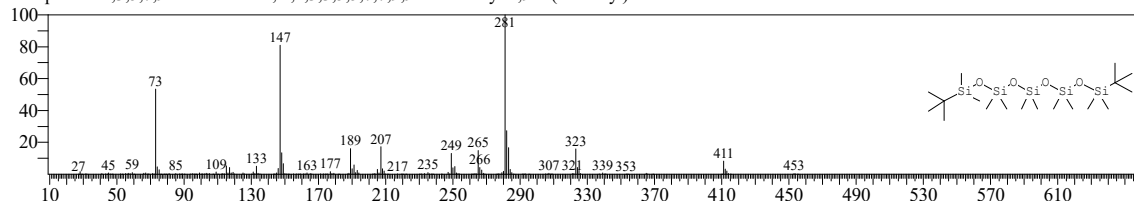

Hit#:4 Entry:249271 Library:NIST20M1.lib

SI:77 Formula:C12H36O4Si5 CAS:38146-99-5 MolWeight:384 RetIndex:1068

CompName:1,1,1,3,5,5,7,7-Nonamethyl-3-(trimethylsiloxy)tetrasiloxane \$\$ 1,1,1,3,3,5,5,7,7-Nonamethyl-5-[(trimethylsilyl)oxy]tetrasiloxane #

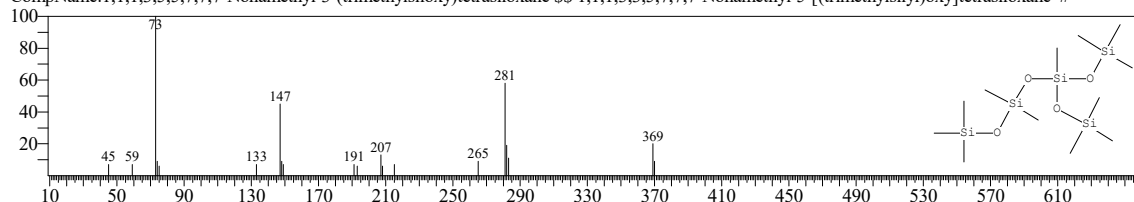

Hit#:5 Entry:158097 Library:NIST20M1.lib

SI:75 Formula:C14H24O3Si2 CAS:0-00-0 MolWeight:296 RetIndex:1625

CompName:2,6-Dihydroxyacetophenone, 2TMS derivative \$\$ 2',6'-Dihydroxyacetophenone, bis(trimethylsilyl) ether

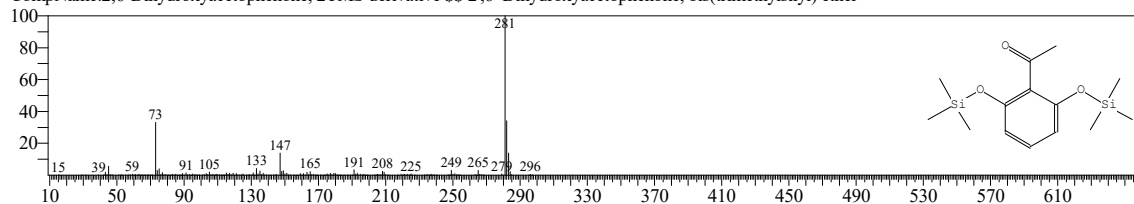

# TNAU

<< Target >>

Line#:5 R.Time:11.135(Scan#:1228) MassPeaks:344

RawMode:Averaged 11.130-11.140(1227-1229) BasePeak:69.05(1569)

BG Mode:Calc. from Peak Group 1 - Event 1 Q3 Scan

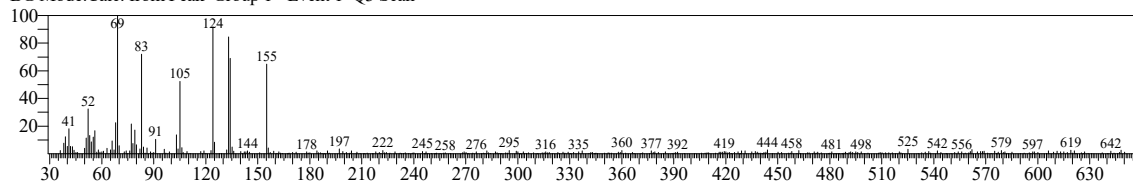

Hit#:1 Entry:33 Library:FA\_ME\_SP2560\_EI\_V3.lib

SI:40 Formula:C21H34O2 CAS:506-32-1 MolWeight:318 RetIndex:3109

CompName:Methyl arachidonate ; (5Z,8Z,11Z,14Z)-icosa-5,8,11,14-tetraenoic acid

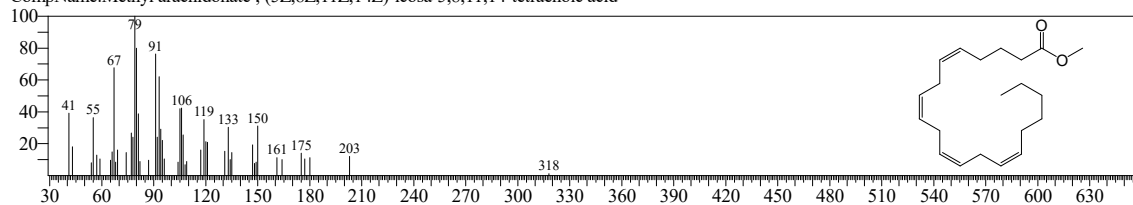

Hit#:2 Entry:38 Library:FA\_ME\_SP2560\_EI\_V3.lib

SI:39 Formula:C23H34O2 CAS:6217-54-5 MolWeight:342 RetIndex:3514

CompName:Methyl cis-4,7,10,13,16,19-Docosahexaenoate ; Docosa-4,7,10,13,16,19-hexaenoic acid

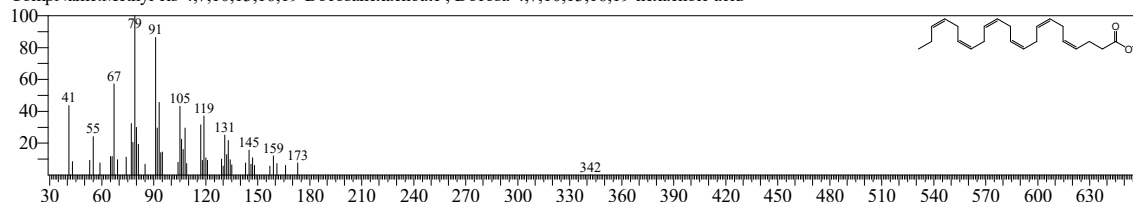

Hit#:3 Entry:36 Library:FA\_ME\_SP2560\_EI\_V3.lib

SI:39 Formula:C21H32O2 CAS:10417-94-4 MolWeight:316 RetIndex:3232

CompName:Methyl cis-5,8,11,14,17-Eicosapentaenoate ; Icosa-5,8,11,14,17-pentaenoic acid

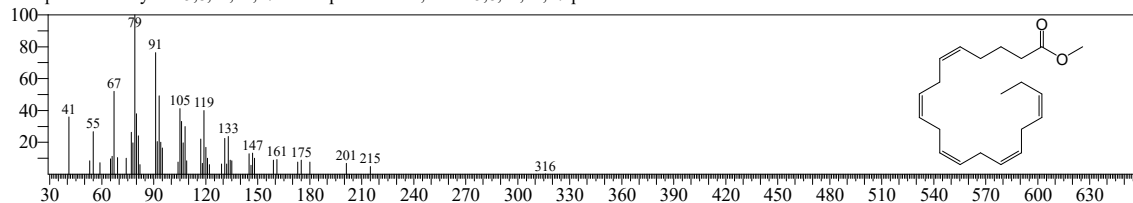

Hit#:4 Entry:34 Library:FA\_ME\_SP2560\_EI\_V3.lib

SI:38 Formula:C23H42O2 CAS:7370-49-2 MolWeight:350 RetIndex:3169

CompName:Methyl cis-13,16-Docosadienate ; (13Z,16E)-docosa-13,16-dienoic acid

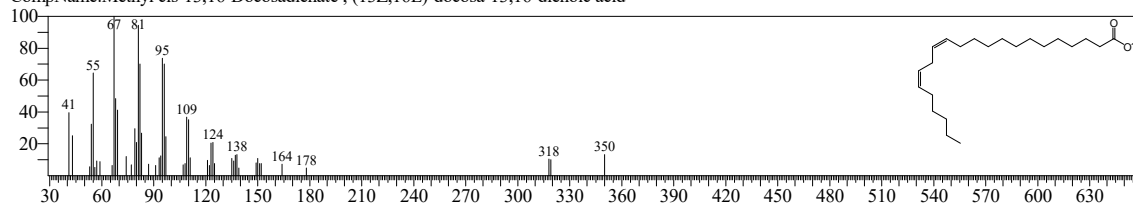

Hit#:5 Entry:9 Library:FA\_ME\_SP2560\_EI\_V3.lib

SI:38 Formula:C15H28O2 CAS:544-64-9 MolWeight:240 RetIndex:2283

CompName:Methyl myristoleate ; ; (Z)-tetradec-9-enoic acid

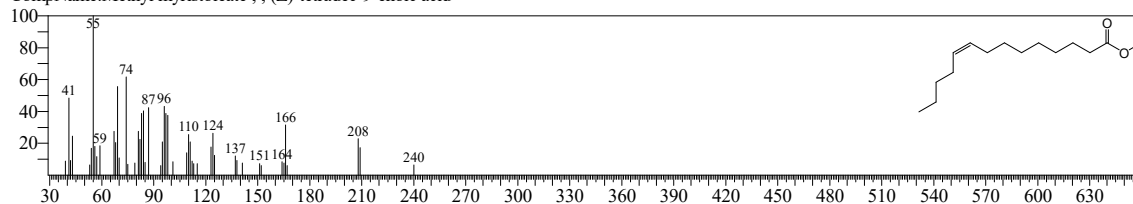

# TNAU

<< Target >>

Line#6 R.Time:12.495(Scan#:1500) MassPeaks:425

RawMode:Averaged 12.490-12.500(1499-1501) BasePeak:138.05(41437)

BG Mode:Calc. from Peak Group 1 - Event 1 Q3 Scan

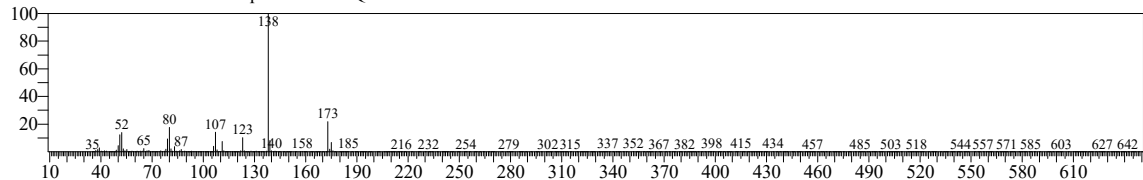

Hit#1 Entry:8360 Library:NIST20R.lib

SI:73 Formula:C<sub>6</sub>H<sub>6</sub>N<sub>2</sub>O<sub>2</sub> CAS:105-11-3 MolWeight:138 RetIndex:1349

CompName:2,5-Cyclohexadiene-1,4-dione, dioxime \$\$ p-Benzoquinone, dioxime \$\$ p-Quinone dioxime \$\$ p-Quinone oxime \$\$ Benzoquinone dioxime \$\$

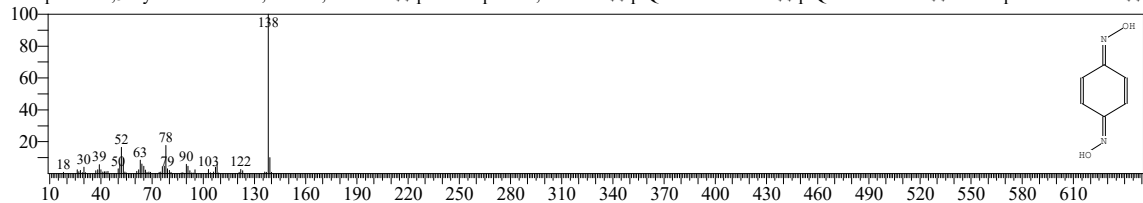

Hit#2 Entry:21 Library:FA\_ME\_SP2560\_EI\_V3.lib

SI:34 Formula:C<sub>19</sub>H<sub>34</sub>O<sub>2</sub> CAS:60-33-3 MolWeight:294 RetIndex:2775

CompName:Methyl linoleate ; Octadeca-9,12-dienoic acid

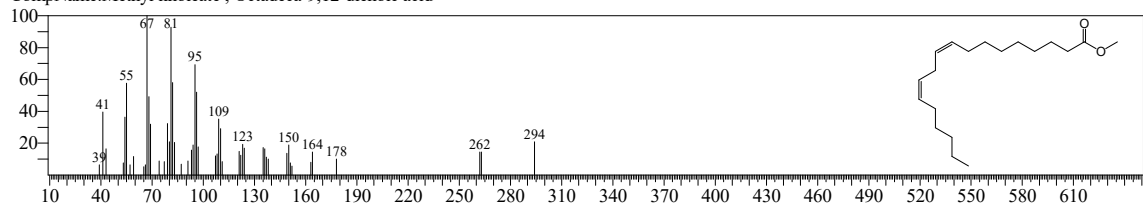

Hit#3 Entry:34 Library:FA\_ME\_SP2560\_EI\_V3.lib

SI:34 Formula:C<sub>23</sub>H<sub>42</sub>O<sub>2</sub> CAS:7370-49-2 MolWeight:350 RetIndex:3169

CompName:Methyl cis-13,16-Docosadienate ; (13Z,16E)-docosa-13,16-dienoic acid

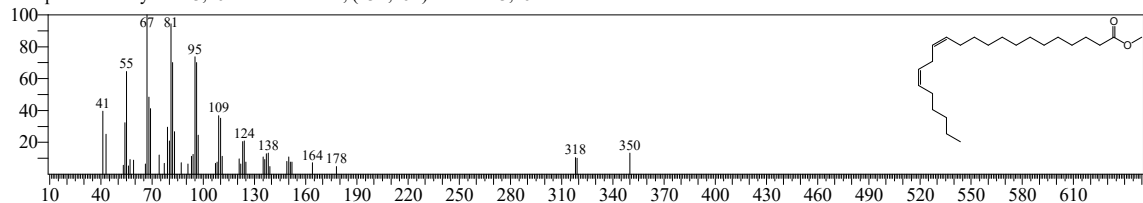

Hit#4 Entry:20 Library:FA\_ME\_SP2560\_EI\_V3.lib

SI:34 Formula:C<sub>19</sub>H<sub>34</sub>O<sub>2</sub> CAS:506-21-8 MolWeight:294 RetIndex:2727

CompName:Methyl linolelaidate ; (9E,12E)-octadeca-9,12-dienoic acid

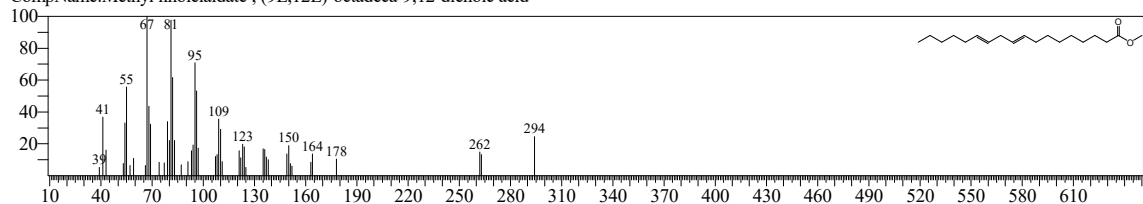

Hit#5 Entry:25 Library:FA\_ME\_SP2560\_EI\_V3.lib

SI:33 Formula:C<sub>19</sub>H<sub>32</sub>O<sub>2</sub> CAS:463-40-1 MolWeight:292 RetIndex:2892

CompName:Methyl linolenate ; (9Z,12Z,15Z)-octadeca-9,12,15-trienoic acid

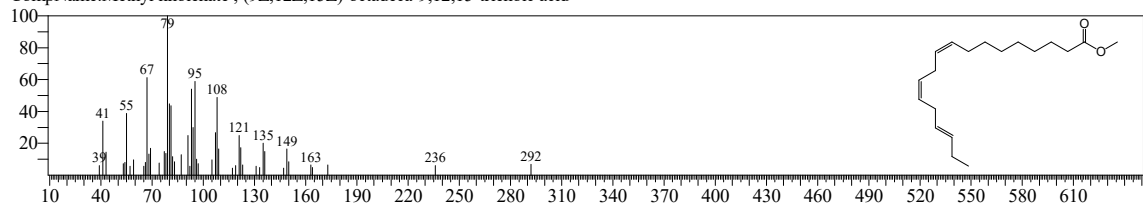

# TNAU

<< Target >>

Line#:7 R.Time:12.820(Scan#:1565) MassPeaks:395

RawMode:Averaged 12.815-12.825(1564-1566) BasePeak:138.05(58542)

BG Mode:Calc. from Peak Group 1 - Event 1 Q3 Scan

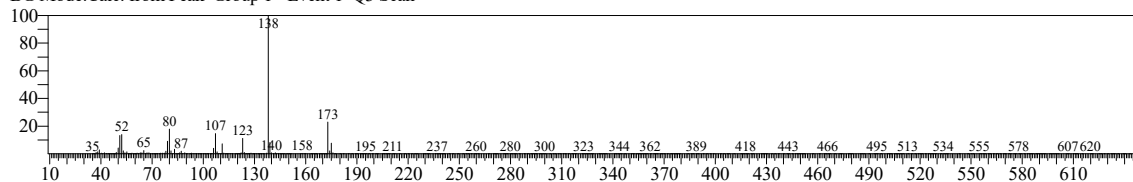

Hit#:1 Entry:11187 Library:NIST20M1.lib

SI:74 Formula:C7H6O3 CAS:533-31-3 MolWeight:138 RetIndex:1245

CompName:1,3-Benzodioxol-5-ol \$\$ Phenol, 3,4-(methylenedioxy)- \$\$ Sesamol \$\$ 3,4-(Methylenedioxy)phenol \$\$ 5-Hydroxy-1,3-benzodioxole \$\$ Methy

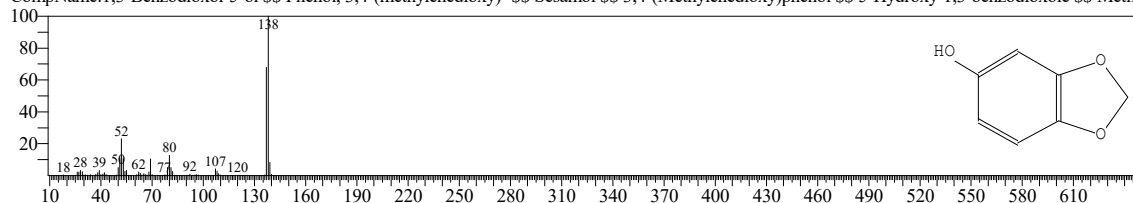

Hit#:2 Entry:8360 Library:NIST20R.lib

SI:73 Formula:C6H6N2O2 CAS:105-11-3 MolWeight:138 RetIndex:1349

CompName:2,5-Cyclohexadiene-1,4-dione, dioxime \$\$ p-Benzoquinone, dioxime \$\$ p-Quinone dioxime \$\$ p-Quinone oxime \$\$ Benzoquinone dioxime \$\$

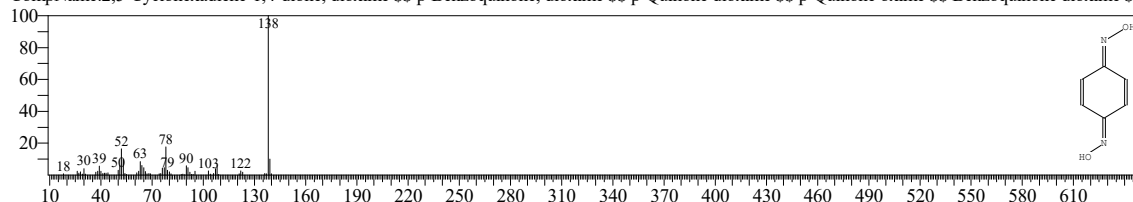

Hit#:3 Entry:11188 Library:NIST20M1.lib

SI:73 Formula:C7H6O3 CAS:69393-72-2 MolWeight:138 RetIndex:1245

CompName:2,3-Methylenedioxyphenol \$\$ 1,3-Benzodioxol-4-ol #

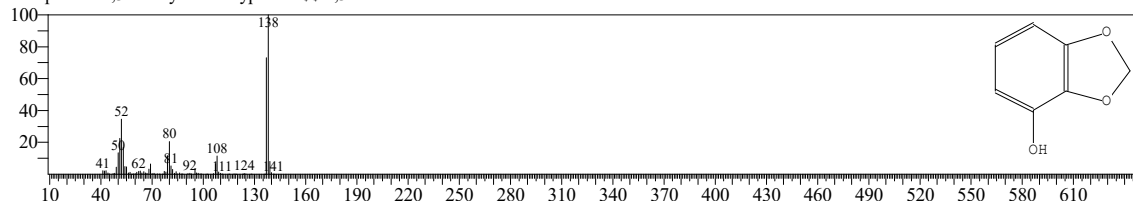

Hit#:4 Entry:8422 Library:NIST20R.lib

SI:71 Formula:C7H10N2O CAS:25680-58-4 MolWeight:138 RetIndex:1070

CompName:2-Ethyl-3-methoxypyrazine \$\$ 2-Methoxy-3-ethylpyrazine \$\$ Pyrazine, 2-ethyl-3-methoxy- \$\$ 3-Ethyl-2-methoxypyrazine \$\$ Pyrazine, 3-ethyl-

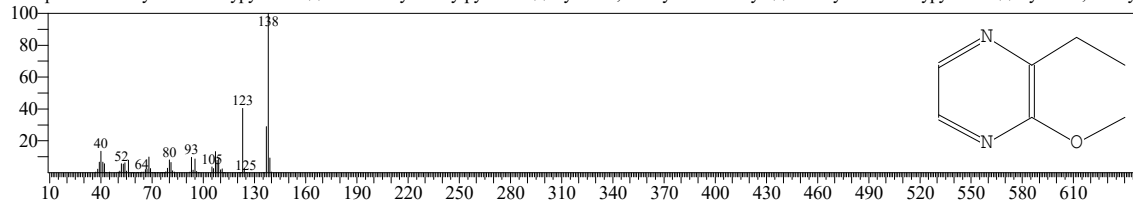

Hit#:5 Entry:11222 Library:NIST20M1.lib

SI:70 Formula:C7H10N2O CAS:3471-32-7 MolWeight:138 RetIndex:1325

CompName:Hydrazine, (4-methoxyphenyl)- \$\$ (p-Methoxyphenyl)hydrazine \$\$ 1-(4-Methoxyphenyl)hydrazine #

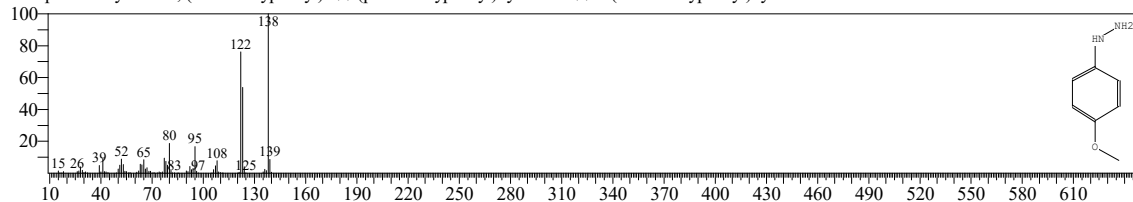



# TNAU

<< Target >>

Line#:8 R.Time:13.385(Scan#:1678) MassPeaks:319

RawMode:Averaged 13.380-13.390(1677-1679) BasePeak:155.05(34066)

BG Mode:Calc. from Peak Group 1 - Event 1 Q3 Scan

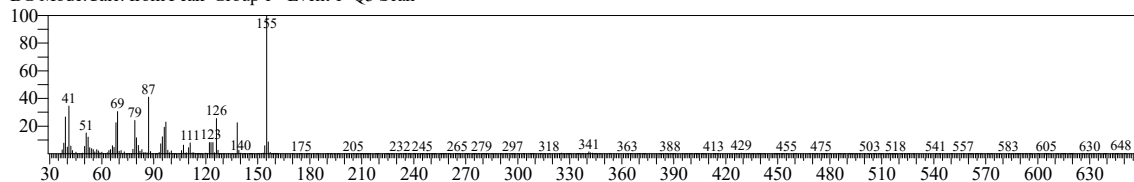

Hit#:1 Entry:34 Library:FA\_ME\_SP2560\_EI\_V3.lib

SI:53 Formula:C23H42O2 CAS:7370-49-2 MolWeight:350 RetIndex:3169

CompName:Methyl cis-13,16-Docosadienate ; (13Z,16E)-docosa-13,16-dienoic acid

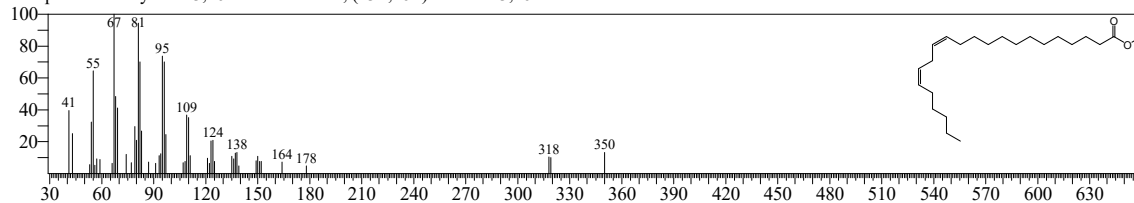

Hit#:2 Entry:21 Library:FA\_ME\_SP2560\_EI\_V3.lib

SI:52 Formula:C19H34O2 CAS:60-33-3 MolWeight:294 RetIndex:2775

CompName:Methyl linoleate ; Octadeca-9,12-dienoic acid

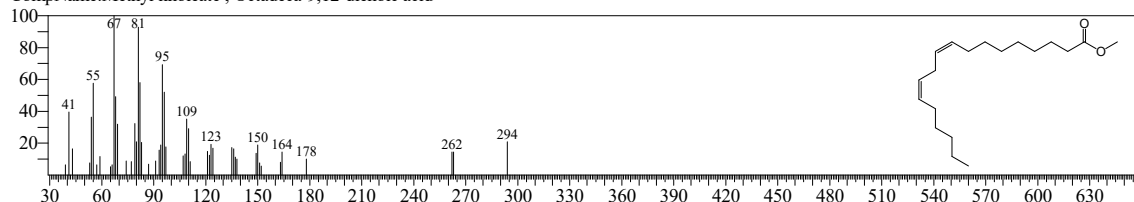

Hit#:3 Entry:20 Library:FA\_ME\_SP2560\_EI\_V3.lib

SI:51 Formula:C19H34O2 CAS:506-21-8 MolWeight:294 RetIndex:2727

CompName:Methyl linolelaidate ; (9E,12E)-octadeca-9,12-dienoic acid

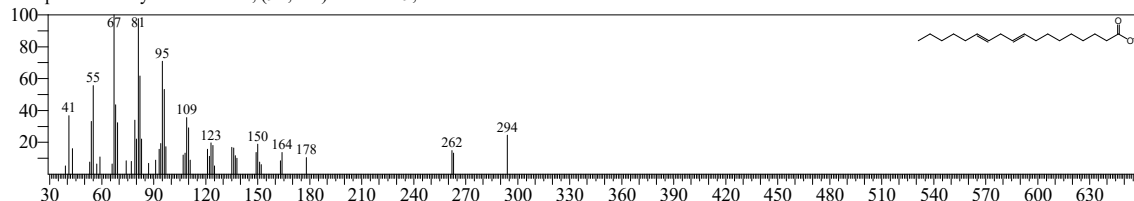

Hit#:4 Entry:11 Library:FA\_ME\_SP2560\_EI\_V3.lib

SI:51 Formula:C16H30O2 CAS:84743-29-3 MolWeight:254 RetIndex:2388

CompName:Methyl cis-10-pentadecenoate ; (Z)-pentadec-10-enoic acid

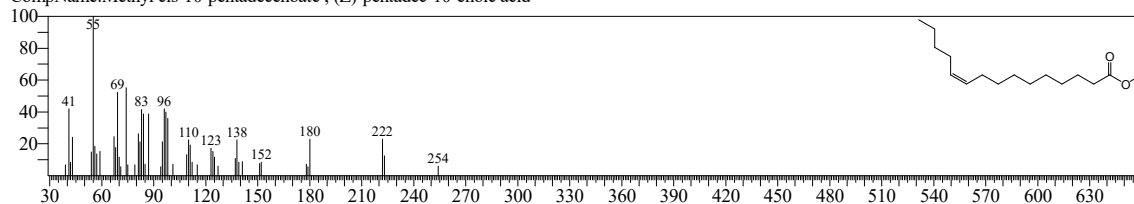

Hit#:5 Entry:27 Library:FA\_ME\_SP2560\_EI\_V3.lib

SI:51 Formula:C21H38O2 CAS:2091-39-6 MolWeight:322 RetIndex:2973

CompName:Methyl cis-11,14-Icosadienoate ; ; Icosa-11,14-dienoic acid

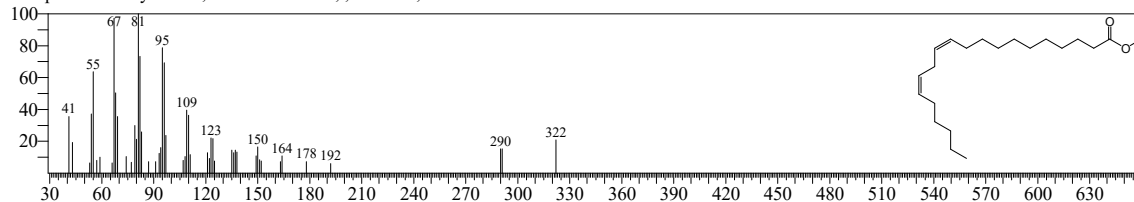

# TNAU

<< Target >>

Line#9 R.Time:13.570(Scan#:1715) MassPeaks:345

RawMode:Averaged 13.565-13.575(1714-1716) BasePeak:155.05(27303)

BG Mode:Calc. from Peak Group 1 - Event 1 Q3 Scan

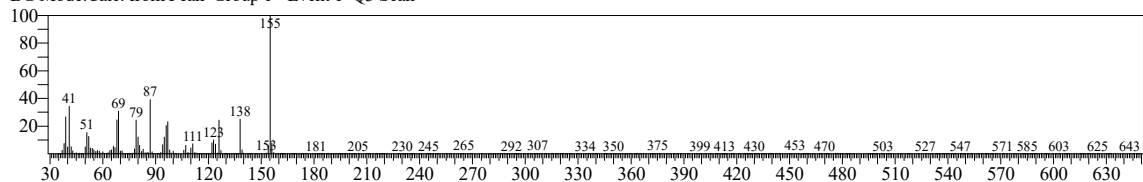

Hit#:1 Entry:34 Library:FA\_ME\_SP2560\_EI\_V3.lib

SI:53 Formula:C23H42O2 CAS:7370-49-2 MolWeight:350 RetIndex:3169

CompName:Methyl cis-13,16-Docosadienate ; (13Z,16E)-docosa-13,16-dienoic acid

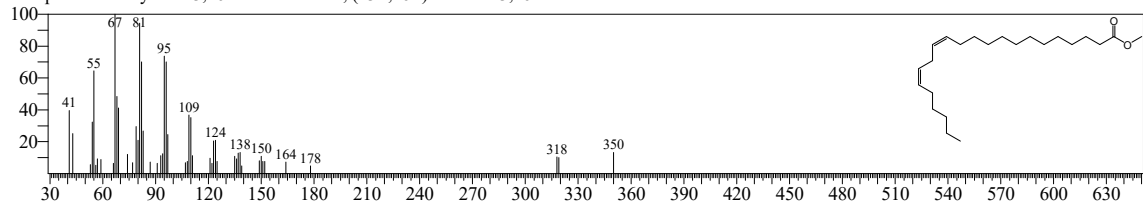

Hit#:2 Entry:21 Library:FA\_ME\_SP2560\_EI\_V3.lib

SI:52 Formula:C19H34O2 CAS:60-33-3 MolWeight:294 RetIndex:2775

CompName:Methyl linoleate ; Octadeca-9,12-dienoic acid

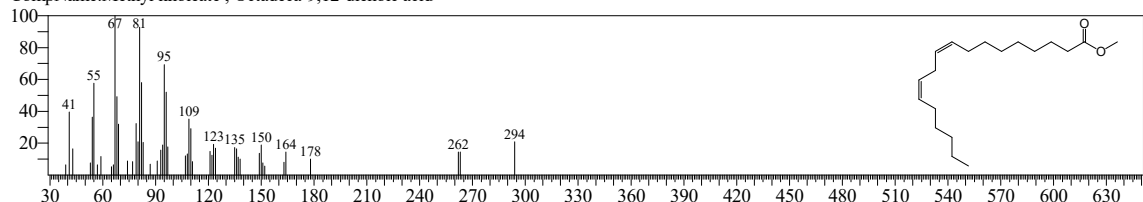

Hit#:3 Entry:20 Library:FA\_ME\_SP2560\_EI\_V3.lib

SI:52 Formula:C19H34O2 CAS:506-21-8 MolWeight:294 RetIndex:2727

CompName:Methyl linolelaidate ; (9E,12E)-octadeca-9,12-dienoic acid

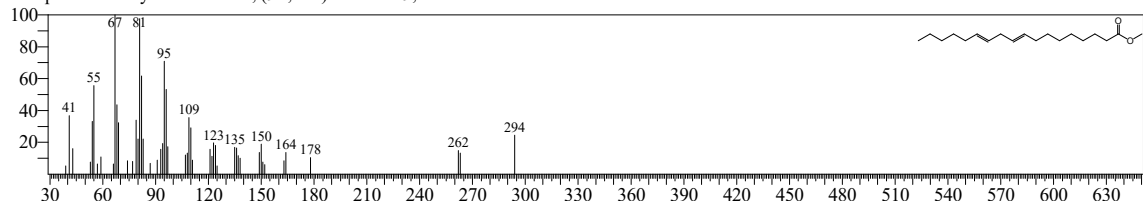

Hit#:4 Entry:11 Library:FA\_ME\_SP2560\_EI\_V3.lib

SI:51 Formula:C16H30O2 CAS:84743-29-3 MolWeight:254 RetIndex:2388

CompName:Methyl cis-10-pentadecenoate ; (Z)-pentadec-10-enoic acid

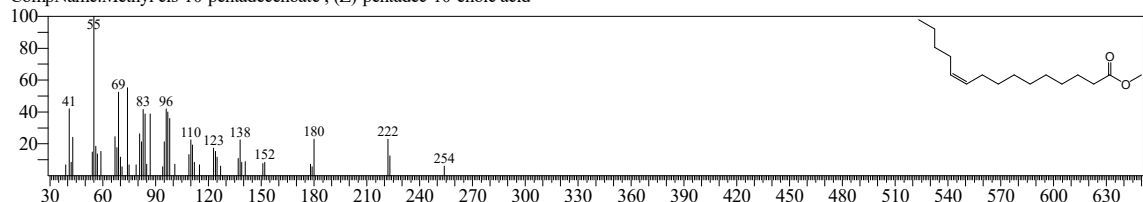

Hit#:5 Entry:27 Library:FA\_ME\_SP2560\_EI\_V3.lib

SI:51 Formula:C21H38O2 CAS:2091-39-6 MolWeight:322 RetIndex:2973

CompName:Methyl cis-11,14-Icosadienoate ; ; Icosa-11,14-dienoic acid

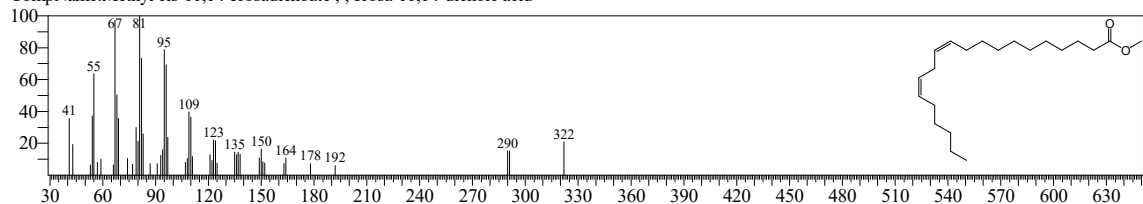

# TNAU

<< Target >>

Line#:10 R.Time:14.470(Scan#:1895) MassPeaks:344

RawMode:Averaged 14.465-14.475(1894-1896) BasePeak:163.10(1659)

BG Mode:Calc. from Peak Group 1 - Event 1 Q3 Scan

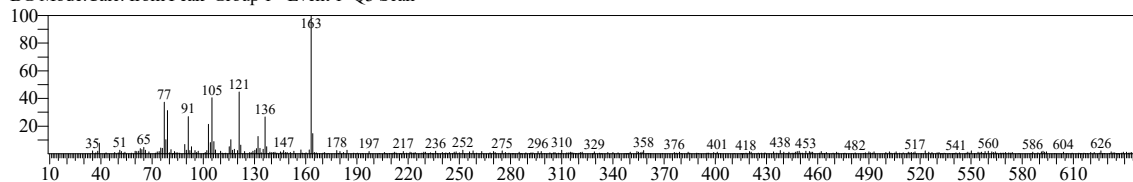

Hit#:1 Entry:25351 Library:NIST20M1.lib

SI:74 Formula:C10H12O2 CAS:38998-17-3 MolWeight:164 RetIndex:1398

CompName:2,3-Dimethyl-para-anisaldehyde \$\$ Benzaldehyde, 4-methoxy-2,3-dimethyl- \$\$ 4-Methoxy-2,3-dimethylbenzaldehyde #

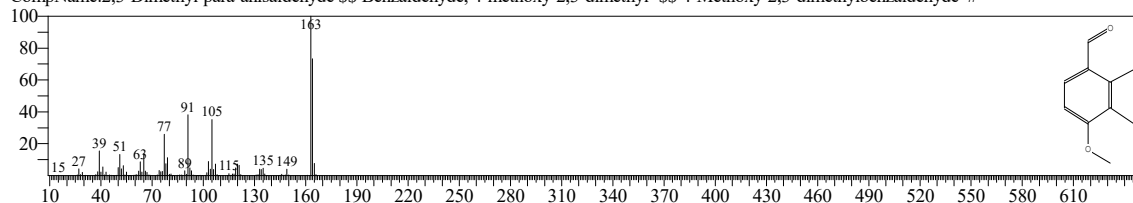

Hit#:2 Entry:57597 Library:NIST20M1.lib

SI:74 Formula:C10H11N3S CAS:39181-45-8 MolWeight:205 RetIndex:1890

CompName:5-(4-Methylbenzyl)-1,3,4-thiadiazol-2-amine \$\$ 1,3,4-Thiadiazol-2-amine, 5-[(4-methylphenyl)methyl]- \$\$ 5-[(4-Methylphenyl)methyl]-1,3,4-thiadiazol-2-amine

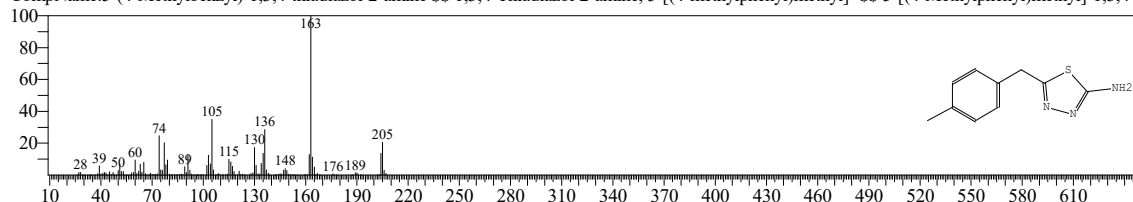

Hit#:3 Entry:35590 Library:NIST20M1.lib

SI:73 Formula:C12H18O CAS:0-00-0 MolWeight:178 RetIndex:1310

CompName:2-tert-Butyl-6-methylphenol, methyl ether

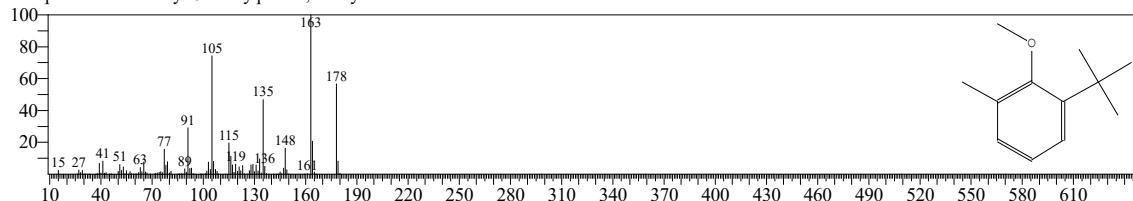

Hit#:4 Entry:176186 Library:NIST20M1.lib

SI:73 Formula:C17H17N3O3 CAS:0-00-0 MolWeight:311 RetIndex:3129

CompName:Oxalic acid, monoamide monohydrazide, N-(2,4-dimethylphenyl)-N''-salicylidene- \$\$ N-(2,4-Dimethylphenyl)-2-[(2E)-2-(2-hydroxybenzylidene)hydrazine-1-carbonyl]-1,3,4-dihydro-2H-pyridine-2,4-dione

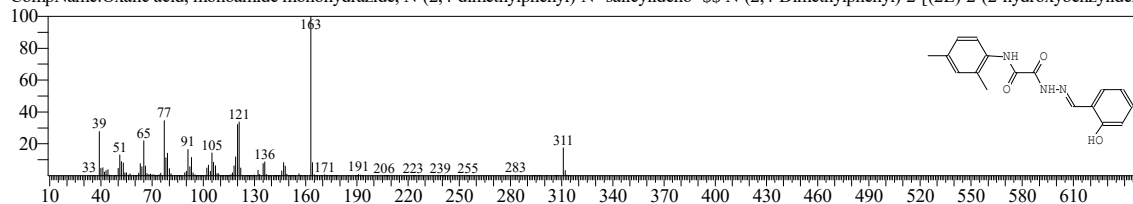

Hit#:5 Entry:35600 Library:NIST20M1.lib

SI:72 Formula:C12H18O CAS:31268-79-8 MolWeight:178 RetIndex:1310

CompName:4-tert-Butyl-3-methylphenyl, methyl ether \$\$ Anisole, 4-tert-butyl-3-methyl- \$\$ 1-(1,1-Dimethylethyl)-4-methoxy-2-methylbenzene

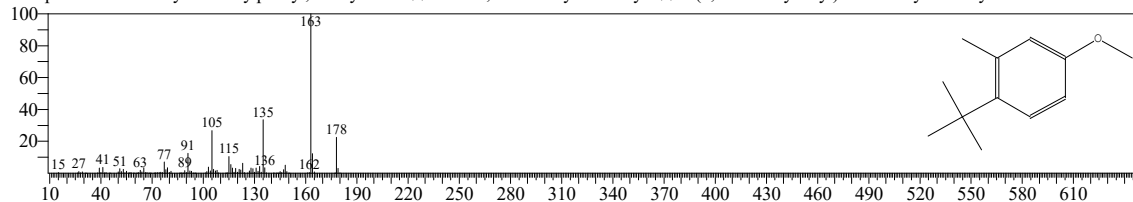

# TNAU

<< Target >>

Line#:11 R.Time:18.110(Scan#:2623) MassPeaks:241

RawMode:Averaged 18.105-18.115(2622-2624) BasePeak:60.05(4158)

BG Mode:Calc. from Peak Group 1 - Event 1 Q3 Scan

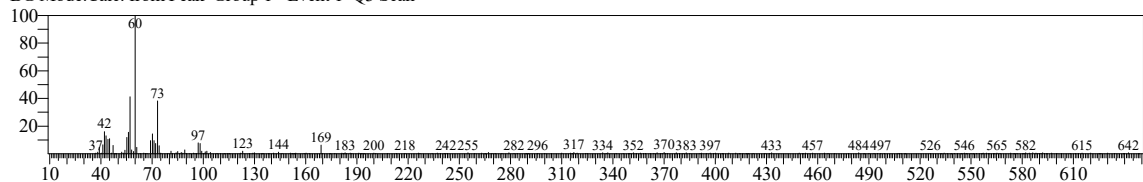

Hit#:1 Entry:23811 Library:NIST20M1.lib

SI:93 Formula:C6H10O5 CAS:498-07-7 MolWeight:162 RetIndex:1404

CompName:.beta.-D-Glucopyranose, 1,6-anhydro- \$\$ Anhydro-d-mannosan \$\$ Levoglucosan \$\$ 1,6-Anhydro-.beta.-D-glucopyranose \$\$ 1,6-Anhydro-beta-

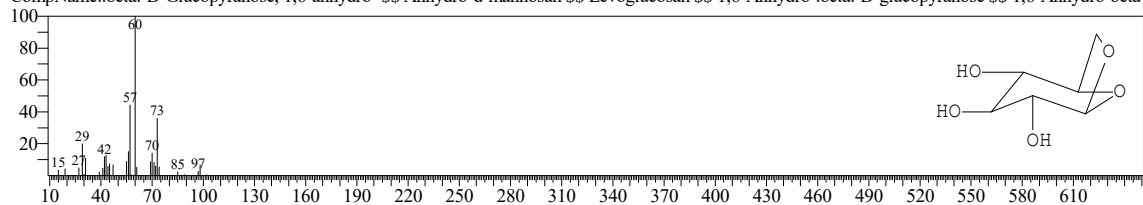

Hit#:2 Entry:36240 Library:NIST20M1.lib

SI:92 Formula:C6H12O6 CAS:2595-97-3 MolWeight:180 RetIndex:1698

CompName:D-Allose \$\$ .beta.-D-Allose \$\$ Hexose #

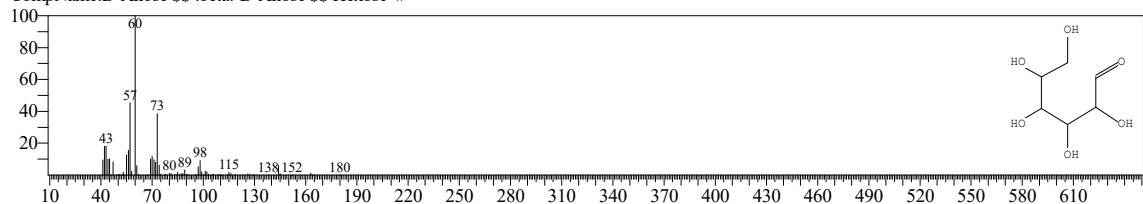

Hit#:3 Entry:23812 Library:NIST20M1.lib

SI:89 Formula:C6H10O5 CAS:0-00-0 MolWeight:162 RetIndex:1404

CompName:1,6-Anhydro-.beta.-d-talopyranose

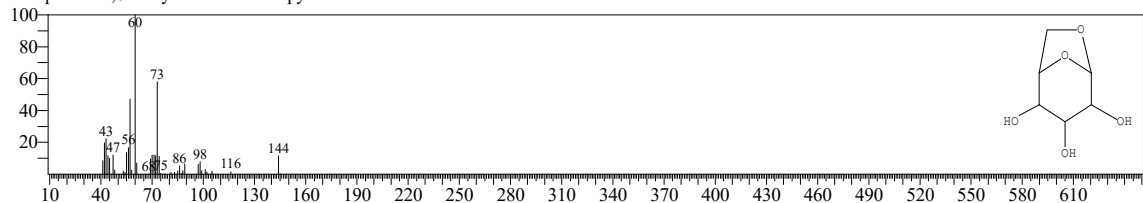

Hit#:4 Entry:23808 Library:NIST20M1.lib

SI:85 Formula:C6H10O5 CAS:0-00-0 MolWeight:162 RetIndex:1400

CompName:3,4-Altrosan \$\$ 3,4-Anhydrohexopyranose #

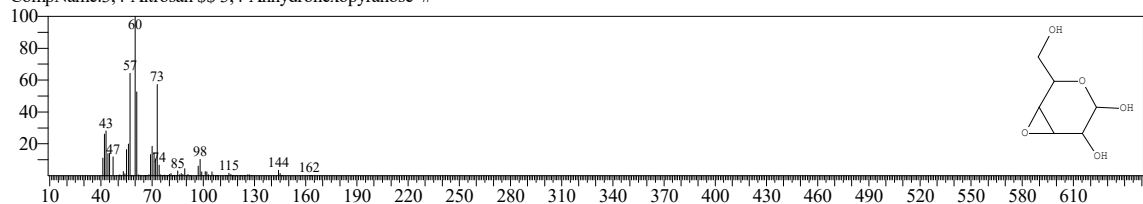

Hit#:5 Entry:47352 Library:NIST20M1.lib

SI:83 Formula:C7H14O6 CAS:709-50-2 MolWeight:194 RetIndex:1714

CompName:.beta.-D-Glucopyranoside, methyl \$\$ Glucopyranoside, methyl, .beta.-D- \$\$ Methyl .beta.-D-glucopyranoside \$\$ Methyl .beta.-D-glucoside \$\$ 1

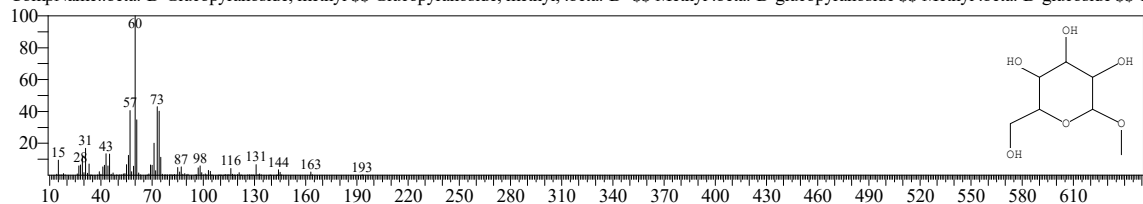

<< Target >>

Line#:12 R.Time:18.205(Scan#:2642) MassPeaks:362

RawMode:Averaged 18.200-18.210(2641-2643) BasePeak:198.00(61)

BG Mode:Calc. from Peak Group 1 - Event 1 Q3 Scan

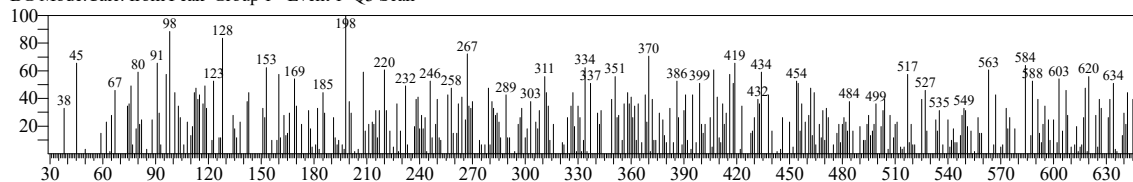

Hit#:1 Entry:208 Library:OA TMS DB5\_67min\_V3.lib

SI:12 Formula:C14H33NO4Si3 CAS:56-86-0 MolWeight:363 RetIndex:1628

CompName:Glutamic acid-3TMS ; (2S)-2-aminopentanedioic acid

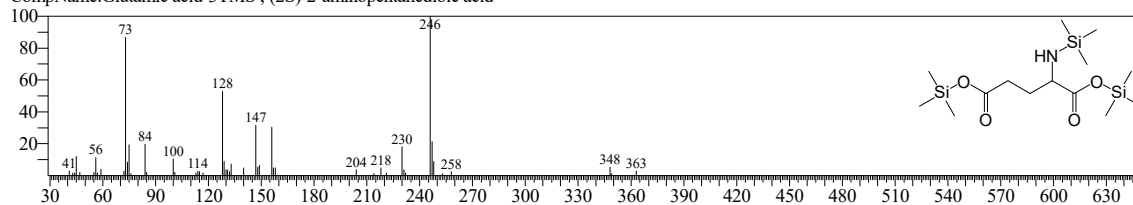

Hit#:2 Entry:531 Library:OA TMS DB5\_67min\_V3.lib

SI:12 Formula:C20H48N2O4S2Si4 CAS:870-93-9 MolWeight:556 RetIndex:2556

CompName:Homocystine-4TMS ; 2-amino-4-[(3-amino-3-carboxypropyl)disulfanyl]butanoic acid

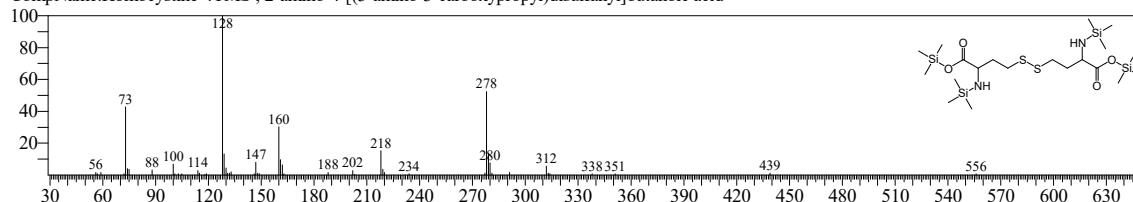

Hit#:3 Entry:329 Library:OA TMS DB5\_67min\_V3.lib

SI:12 Formula:C11H27NO4SSi2 CAS:820-10-0 MolWeight:325 RetIndex:1848

CompName:Methionine sulfone-2TMS ; 2-amino-4-methylsulfonylbutanoic acid

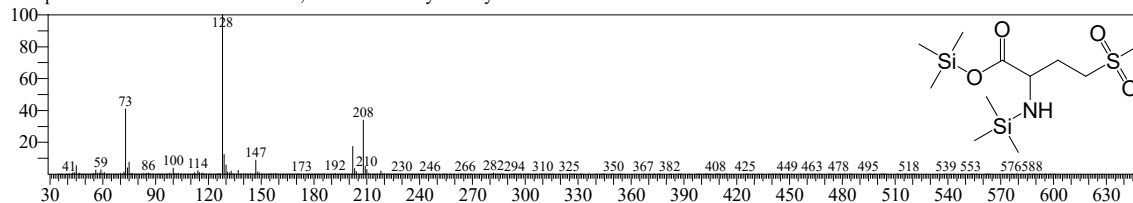

Hit#:4 Entry:563 Library:OA TMS DB5\_67min\_V3.lib

SI:11 Formula:C30H52OSi CAS:67-97-0 MolWeight:456 RetIndex:3053

CompName:Cholecalciferol-TMS ; (1S,3Z)-3-[(2E)-2-[(1R,3aS,7aR)-7a-methyl-1-[(2R)-6-methylheptan-2-yl]-2,3,3a,5,6,7-hexahydro-1H-inden-

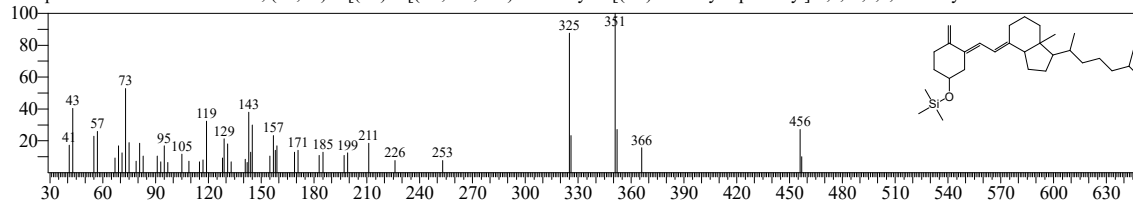

Hit#:5 Entry:377 Library:OA TMS DB5\_67min\_V3.lib

SI:10 Formula:C17H40N2O3Si3 CAS:692-04-6 MolWeight:404 RetIndex:1912

CompName:N6-Acetylysine-3TMS ; (2S)-6-acetamido-2-aminohexanoic acid

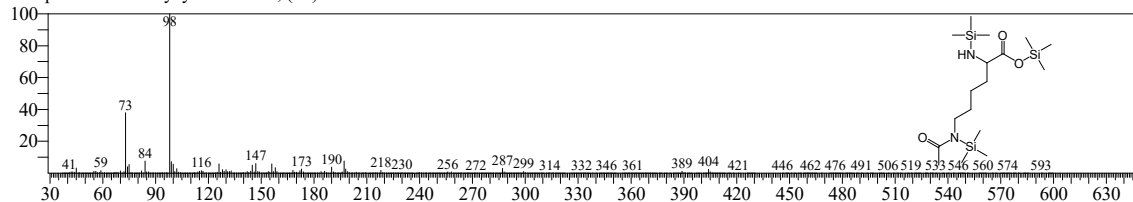

# TNAU

<< Target >>

Line#:13 R.Time:18.495(Scan#:2700) MassPeaks:352

RawMode:Averaged 18.490-18.500(2699-2701) BasePeak:191.10(3621)

BG Mode:Calc. from Peak Group 1 - Event 1 Q3 Scan

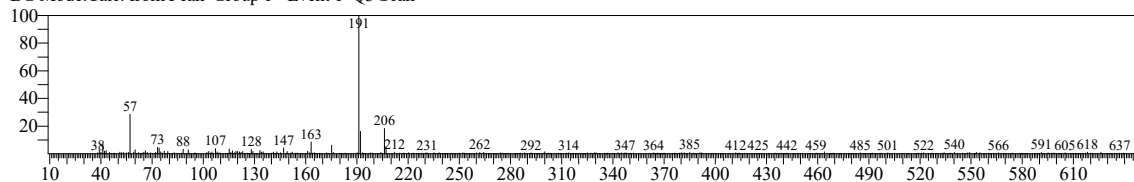

Hit#:1 Entry:24088 Library:NIST20R.lib

SI:90 Formula:C14H22O CAS:96-76-4 MolWeight:206 RetIndex:1555

CompName:2,4-Di-tert-butylphenol \$\$ Phenol, 2,4-bis(1,1-dimethylethyl)- \$\$ Phenol, 2,4-di-tert-butyl- \$\$ 2,4-di-t-Butylphenol \$\$ 1-Hydroxy-2,4-di-tert-bu

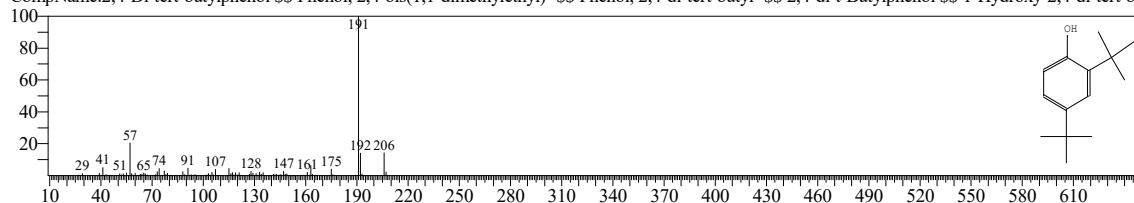

Hit#:2 Entry:24110 Library:NIST20R.lib

SI:88 Formula:C14H22O CAS:1138-52-9 MolWeight:206 RetIndex:1555

CompName:Phenol, 3,5-bis(1,1-dimethylethyl)- \$\$ Phenol, 3,5-di-tert-butyl- \$\$ 3,5-Di-tert-butylphenol \$\$ Phenol, 3,5-bis(t-butyl) \$\$ 3,5-Di-t-butylphenol \$

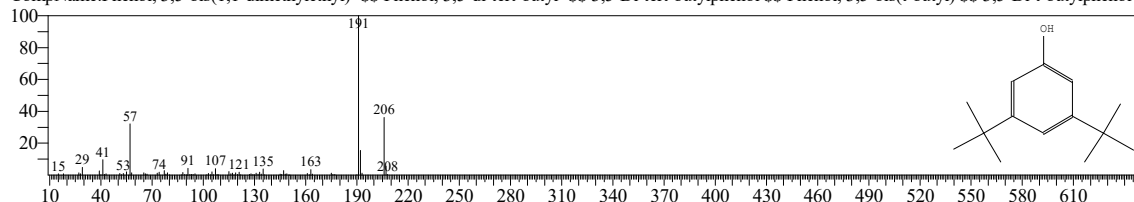

Hit#:3 Entry:24098 Library:NIST20R.lib

SI:87 Formula:C14H22O CAS:5875-45-6 MolWeight:206 RetIndex:1555

CompName:Phenol, 2,5-bis(1,1-dimethylethyl)- \$\$ Phenol, 2,5-di-tert-butyl- \$\$ 2,5-Di-tert-butylphenol \$\$ 2,5-bis(1,1-Dimethylethyl)phenol

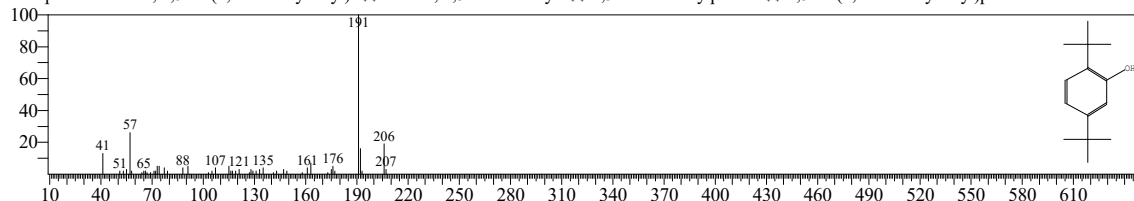

Hit#:4 Entry:24081 Library:NIST20R.lib

SI:86 Formula:C14H22O CAS:128-39-2 MolWeight:206 RetIndex:1555

CompName:Phenol, 2,6-bis(1,1-dimethylethyl)- \$\$ Phenol, 2,6-di-tert-butyl- \$\$ 2,6-Bis(tert-butyl)phenol \$\$ 2,6-Bis(1,1-dimethylethyl)phenol \$\$ 2,6-Di-tert

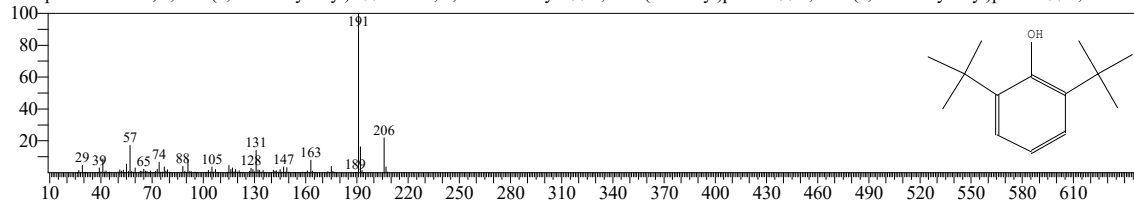

Hit#:5 Entry:170993 Library:NIST20M1.lib

SI:85 Formula:C19H30O3 CAS:166273-38-7 MolWeight:306 RetIndex:2255

CompName:Pentanoic acid, 5-hydroxy-, 2,4-di-t-butylphenyl esters \$\$ 2,4-Ditert-butylphenyl 5-hydroxypentanoate #

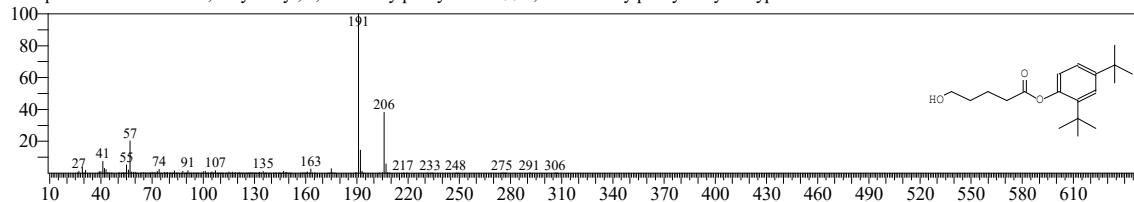

# TNAU

<< Target >>

Line#:14 R.Time:19.190(Scan#:2839) MassPeaks:346

RawMode:Averaged 19.185-19.195(2838-2840) BasePeak:263.15(4550)

BG Mode:Calc. from Peak Group 1 - Event 1 Q3 Scan

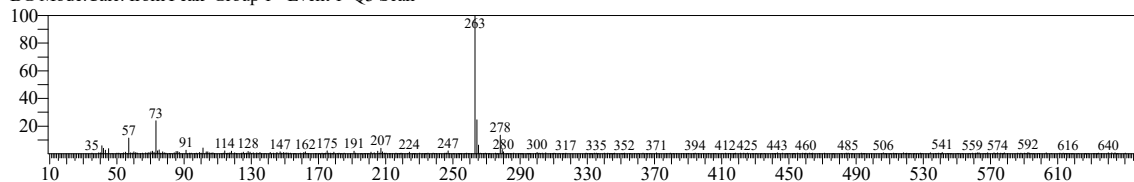

Hit#:1 Entry:137399 Library:NIST20M1.lib

SI:86 Formula:C<sub>17</sub>H<sub>30</sub>O<sub>2</sub>Si CAS:53925-65-8 MolWeight:278 RetIndex:1632

CompName:2,4-Di-tert-butylphenoxytrimethylsilane \$ \$ Benzene, 2,4-bis(1,1-dimethylethyl)-1-[(trimethylsilyl)oxy]- \$ \$ Silane, [2,4-bis(1,1-dimethylethyl)ph

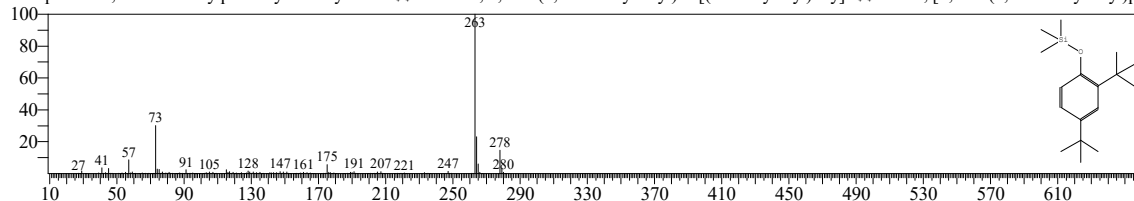

Hit#:2 Entry:136557 Library:NIST20M1.lib

SI:79 Formula:C<sub>12</sub>H<sub>22</sub>N<sub>4</sub>Si<sub>2</sub> CAS:0-00-0 MolWeight:278 RetIndex:1703

CompName:3-Deazaadenine, 2TMS \$ \$ 3-Deazaadenine, N,N'-bis-TMS \$ \$ 1H-Imidazo[4,5-c]pyridin-4-amine, N,N'-bis-TMS

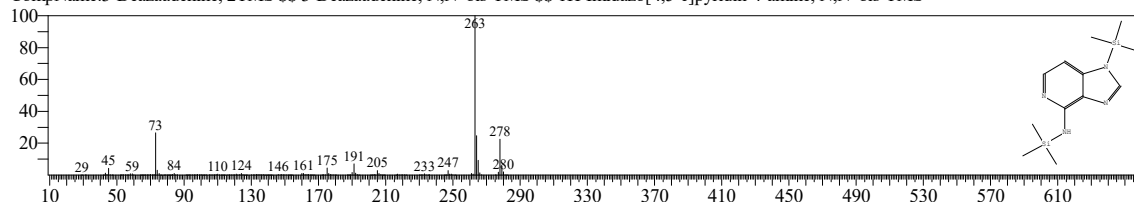

Hit#:3 Entry:33871 Library:NIST20R.lib

SI:77 Formula:C<sub>17</sub>H<sub>30</sub>O<sub>2</sub>Si CAS:10416-73-6 MolWeight:278 RetIndex:1632

CompName:2,6-Bis(tert-butyl)phenol, TMS derivative \$ \$ Trimethyl(2,6 ditert-butylphenoxy)silane \$ \$ (2,6-Ditert-butylphenoxy)(trimethyl)silane #

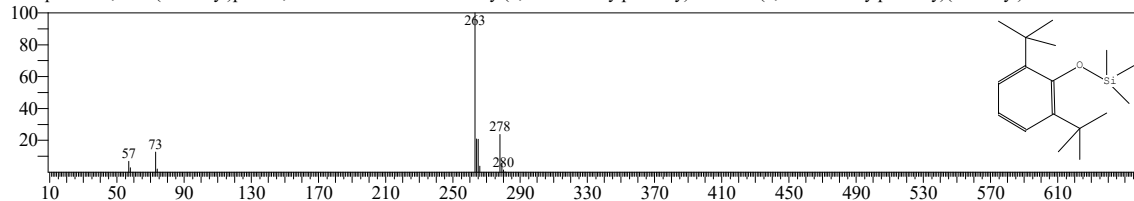

Hit#:4 Entry:136556 Library:NIST20M1.lib

SI:76 Formula:C<sub>12</sub>H<sub>22</sub>N<sub>4</sub>Si<sub>2</sub> CAS:0-00-0 MolWeight:278 RetIndex:1606

CompName:1H,1'H-2,2'-Biimidazole, 2TMS \$ \$ 1H,1'H-2,2'-Biimidazole, N,N'-bis-TMS \$ \$ 1H,1'H-[2,2']Biimidazolyl, 2TMS \$ \$ 2,2'-Bi-1H-imidazole, 2TMS

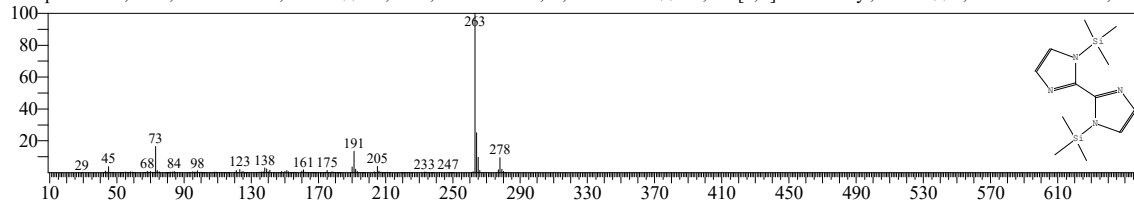

Hit#:5 Entry:137020 Library:NIST20M1.lib

SI:75 Formula:C<sub>15</sub>H<sub>22</sub>O<sub>3</sub>Si CAS:0-00-0 MolWeight:278 RetIndex:1736

CompName:6-Methoxy-2,2-dimethyl-2,3-dihydro-4H-chromen-4-one, TMS \$ \$ 6-Methoxy-2,2-dimethyl-chroman-4-one, O-trimethylsilyl- \$ \$ 4H-1-Benzopy

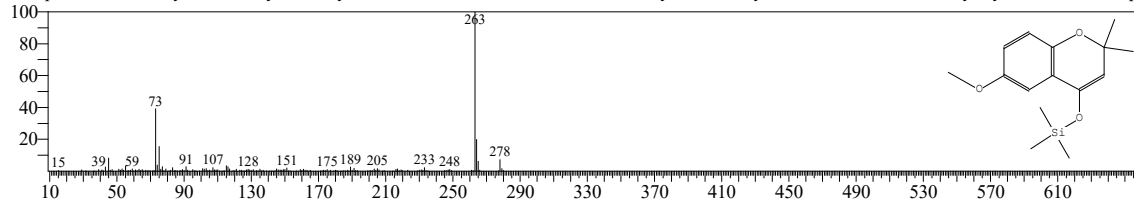

# TNAU

<< Target >>

Line#:15 R.Time:28.295(Scan#:4660) MassPeaks:418

RawMode:Averaged 28.290-28.300(4659-4661) BasePeak:73.05(6519)

BG Mode:Calc. from Peak Group 1 - Event 1 Q3 Scan

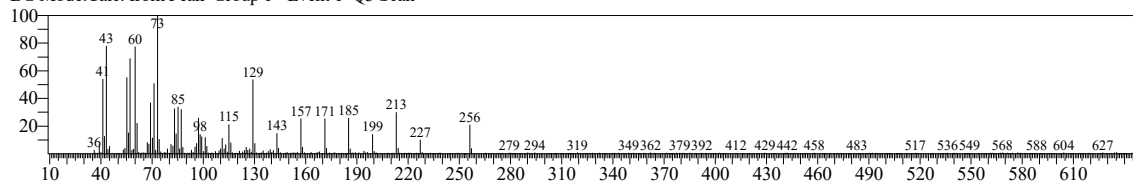

Hit#:1 Entry:31600 Library:NIST20R.lib

SI:94 Formula:C16H32O2 CAS:57-10-3 MolWeight:256 RetIndex:1968

CompName:n-Hexadecanoic acid \$ Hexadecanoic acid \$ n-Hexadecic acid \$ Palmitic acid \$ Pentadecanecarboxylic acid \$ 1-Pentadecanecarboxylic

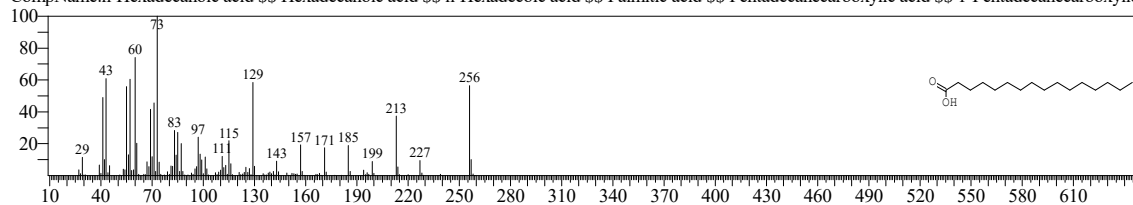

Hit#:2 Entry:29890 Library:NIST20R.lib

SI:91 Formula:C15H30O2 CAS:1002-84-2 MolWeight:242 RetIndex:1869

CompName:Pentadecanoic acid \$ Pentadecylic acid \$ n-Pentadecanoic acid \$ n-Pentadecylic acid

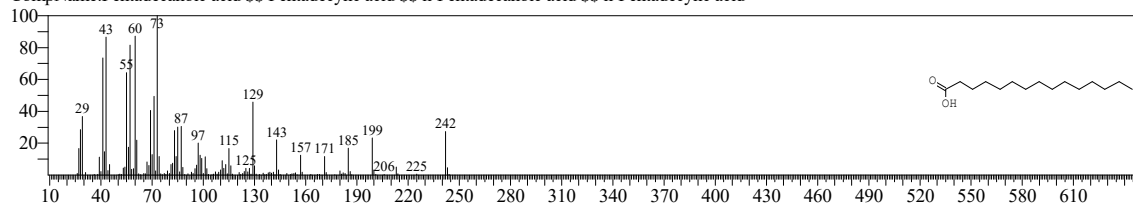

Hit#:3 Entry:44286 Library:NIST20M2.lib

SI:91 Formula:C38H68O8 CAS:28474-90-0 MolWeight:652 RetIndex:4765

CompName:l-(+)-Ascorbic acid 2,6-dihexadecanoate

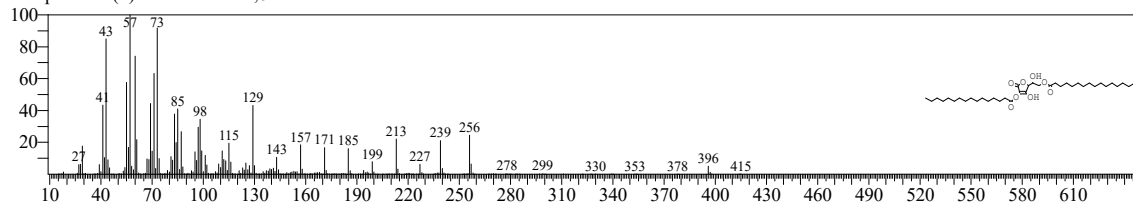

Hit#:4 Entry:25643 Library:NIST20R.lib

SI:89 Formula:C13H26O2 CAS:638-53-9 MolWeight:214 RetIndex:1670

CompName:Tridecanoic acid \$ n-Tridecanoic acid \$ n-Tridecoic acid \$ Tridecylic acid

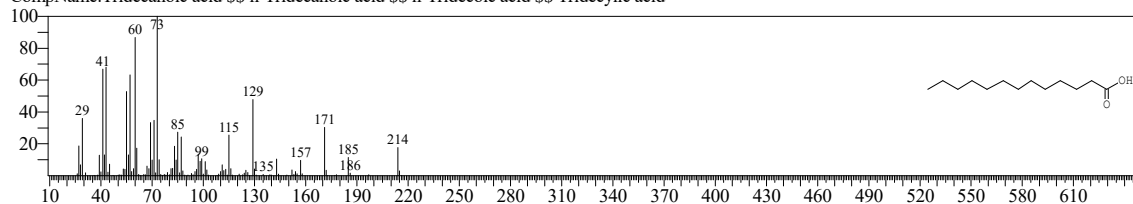

Hit#:5 Entry:144781 Library:NIST20M1.lib

SI:89 Formula:C18H36O2 CAS:57-11-4 MolWeight:284 RetIndex:2167

CompName:Octadecanoic acid \$ Stearic acid \$ n-Octadecanoic acid \$ Humko Industriene R \$ Hydrofol Acid 150 \$ Hystrene S-97 \$ Hystrene T-70 \$

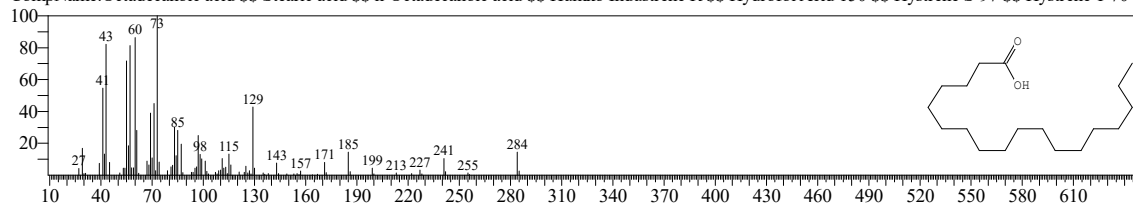



# TNAU

<< Target >>

Line#:16 R.Time:31.470(Scan#:5295) MassPeaks:349

RawMode:Averaged 31.465-31.475(5294-5296) BasePeak:67.05(4027)

BG Mode:Calc. from Peak Group 1 - Event 1 Q3 Scan

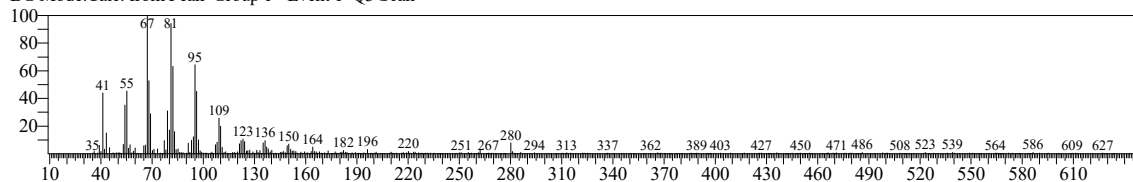

Hit#:1 Entry:34036 Library:NIST20R.lib

SI:95 Formula:C18H32O2 CAS:60-33-3 MolWeight:280 RetIndex:2183

CompName:9,12-Octadecadienoic acid (Z,Z)- \$\$ cis-9,cis-12-Octadecadienoic acid \$\$ cis,cis-Linoleic acid \$\$ Grape seed oil \$\$ Linoleic acid \$

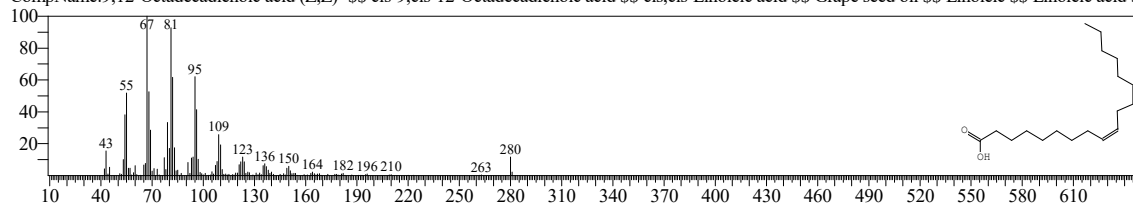

Hit#:2 Entry:139651 Library:NIST20M1.lib

SI:95 Formula:C18H32O2 CAS:544-71-8 MolWeight:280 RetIndex:2183

CompName:(9E,11E)-Octadecadienoic acid

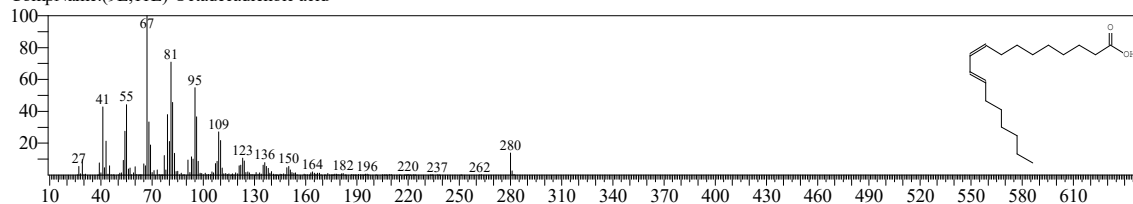

Hit#:3 Entry:139646 Library:NIST20M1.lib

SI:95 Formula:C18H32O2 CAS:2420-56-6 MolWeight:280 RetIndex:2183

CompName:10E,12Z-Octadecadienoic acid

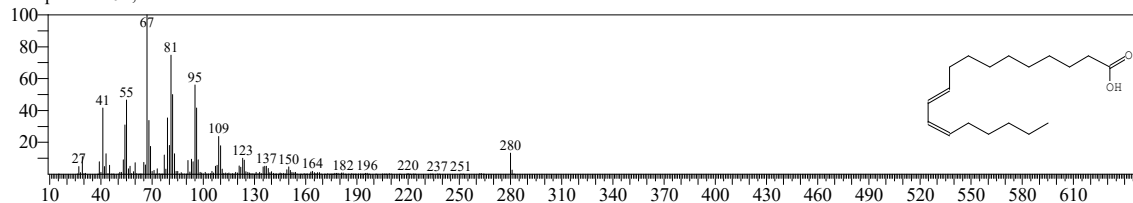

Hit#:4 Entry:173215 Library:NIST20M1.lib

SI:94 Formula:C20H36O2 CAS:2091-39-6 MolWeight:308 RetIndex:2382

CompName:11,14-Eicosadienoic acid

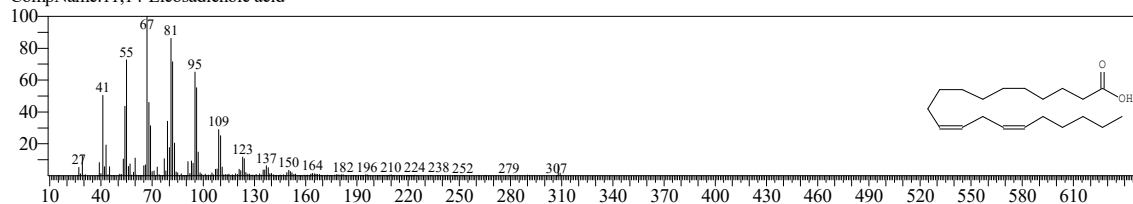

Hit#:5 Entry:139661 Library:NIST20M1.lib

SI:93 Formula:C18H32O2 CAS:506-21-8 MolWeight:280 RetIndex:2183

CompName:Linoelaidic acid

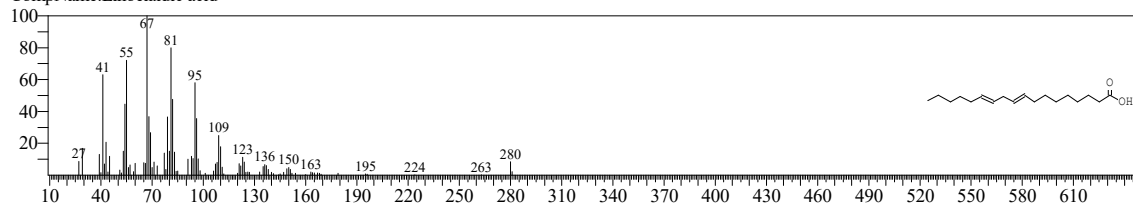

# TNAU

Line#:17 R.Time:31.580(Scan#:5317) MassPeaks:429  
RawMode:Averaged 31.575-31.585(5316-5318) BasePeak:55.10(1675)  
BG Mode:Calc. from Peak Group 1 - Event 1 Q3 Scan

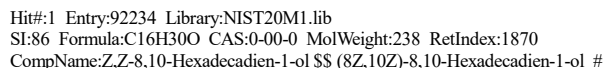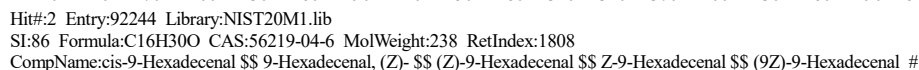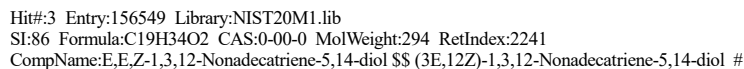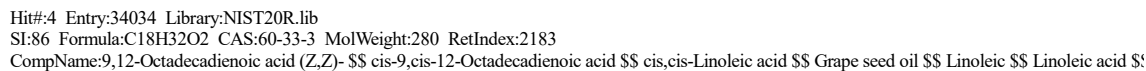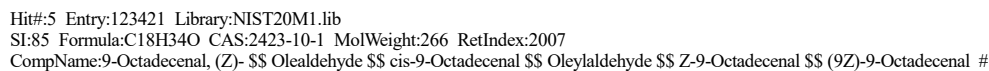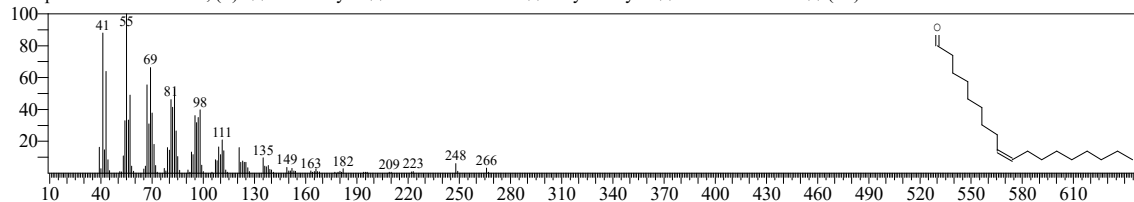

# TNAU

<< Target >>

Line#:18 R.Time:32.030(Scan#:5407) MassPeaks:402

RawMode:Averaged 32.025-32.035(5406-5408) BasePeak:43.05(1186)

BG Mode:Calc. from Peak Group 1 - Event 1 Q3 Scan

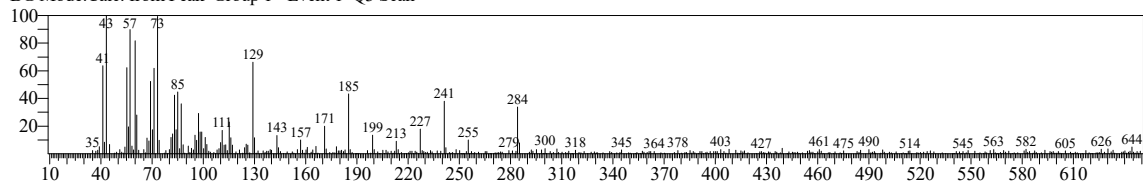

Hit#:1 Entry:34462 Library:NIST20R.lib

SI:91 Formula:C18H36O2 CAS:57-11-4 MolWeight:284 RetIndex:2167

CompName:Octadecanoic acid \$\$ Stearic acid \$\$ n-Octadecanoic acid \$\$ Humko Industriene R \$\$ Hydrofol Acid 150 \$\$ Hystrene S-97 \$\$ Hystrene T-70 \$

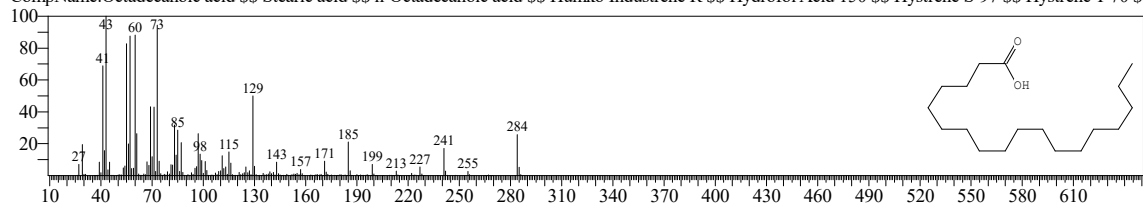

Hit#:2 Entry:44286 Library:NIST20M2.lib

SI:88 Formula:C38H68O8 CAS:28474-90-0 MolWeight:652 RetIndex:4765

CompName:L-(+)-Ascorbic acid 2,6-dihexadecanoate

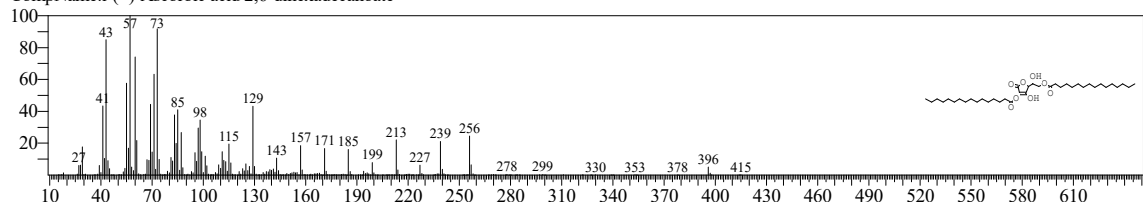

Hit#:3 Entry:29890 Library:NIST20R.lib

SI:87 Formula:C15H30O2 CAS:1002-84-2 MolWeight:242 RetIndex:1869

CompName:Pentadecanoic acid \$\$ Pentadecylic acid \$\$ n-Pentadecanoic acid \$\$ n-Pentadecylic acid

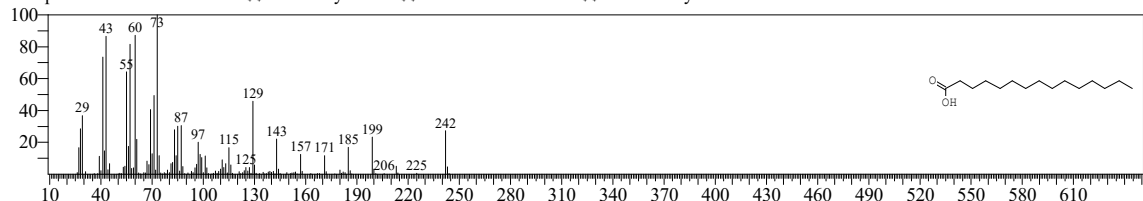

Hit#:4 Entry:36904 Library:NIST20R.lib

SI:86 Formula:C20H40O2 CAS:506-30-9 MolWeight:312 RetIndex:2366

CompName:Eicosanoic acid \$\$ Arachic acid \$\$ Arachidic acid \$\$ Icosenoic acid \$\$ n-Eicosanoic acid \$\$ Arachidic acid (synthetic)

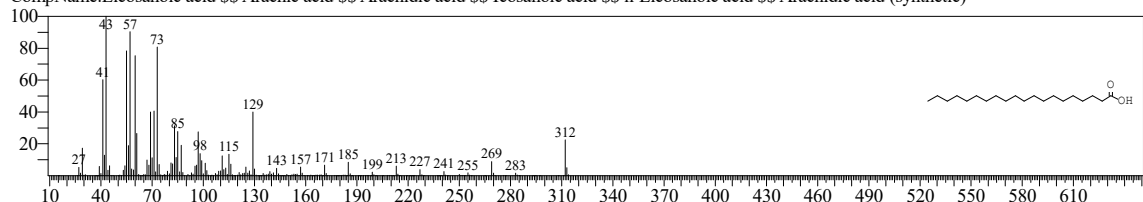

Hit#:5 Entry:31599 Library:NIST20R.lib

SI:86 Formula:C16H32O2 CAS:57-10-3 MolWeight:256 RetIndex:1968

CompName:n-Hexadecanoic acid \$\$ Hexadecanoic acid \$\$ n-Hexadecic acid \$\$ Palmitic acid \$\$ Pentadecanecarboxylic acid \$\$ 1-Pentadecanecarboxylic

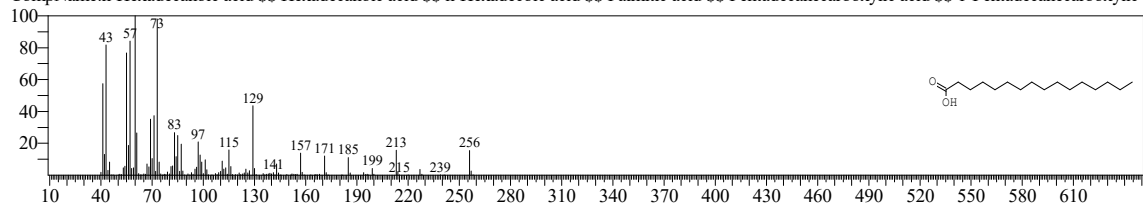

# TNAU

<< Target >>

Line#:19 R.Time:41.590(Scan#:7319) MassPeaks:334

RawMode:Averaged 41.585-41.595(7318-7320) BasePeak:355.05(974)

BG Mode:Calc. from Peak Group 1 - Event 1 Q3 Scan

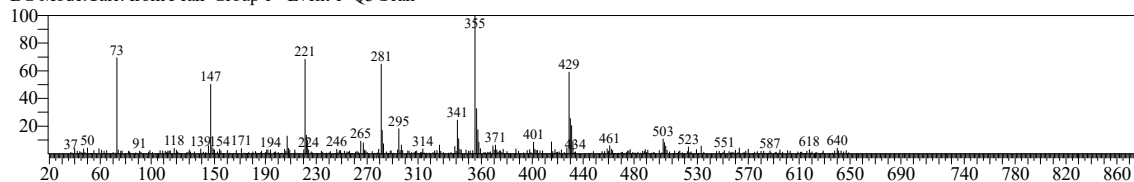

Hit#:1 Entry:46368 Library:NIST20M2.lib

SI:80 Formula:C<sub>24</sub>H<sub>72</sub>O<sub>12</sub>Si<sub>12</sub> CAS:18919-94-3 MolWeight:888 RetIndex:2480

CompName:Tetracosamethyl-cyclododecasiloxane \$ \$ 2,2,4,4,6,6,8,8,10,10,12,12,14,14,16,16,18,18,20,20,22,22,24,24-Tetracosamethylcyclododecasiloxan

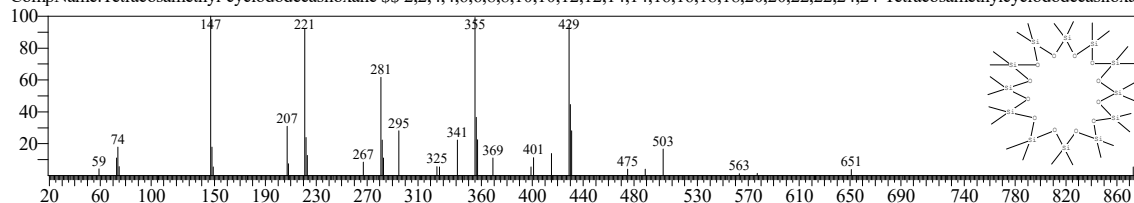

Hit#:2 Entry:43658 Library:NIST20R.lib

SI:79 Formula:C<sub>18</sub>H<sub>54</sub>O<sub>9</sub>Si<sub>9</sub> CAS:556-71-8 MolWeight:666 RetIndex:1860

CompName:Cyclononasiloxane, octadecamethyl- \$ \$ Octadecamethyl-cyclononasiloxane \$ \$ 2,2,4,4,6,6,8,8,10,10,12,12,14,14,16,16,18,18-Octadecamethyley

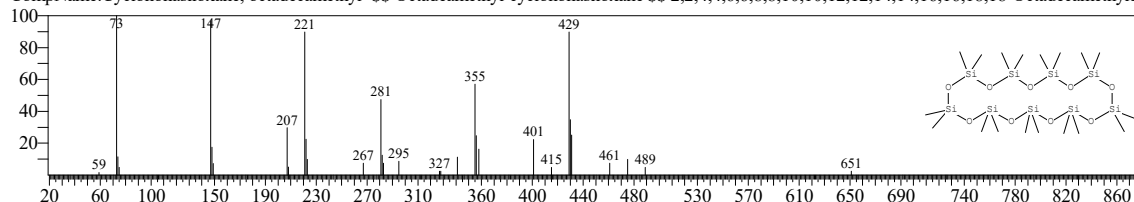

Hit#:3 Entry:45685 Library:NIST20M2.lib

SI:78 Formula:C<sub>20</sub>H<sub>60</sub>O<sub>10</sub>Si<sub>10</sub> CAS:18772-36-6 MolWeight:740 RetIndex:2067

CompName:Cyclodecasiloxane, eicosamethyl- \$ \$ 2,2,4,4,6,6,8,8,10,10,12,12,14,14,16,16,18,18,20-Icosamethylcyclodecasiloxane # \$ \$ Eicosamethyl-cy

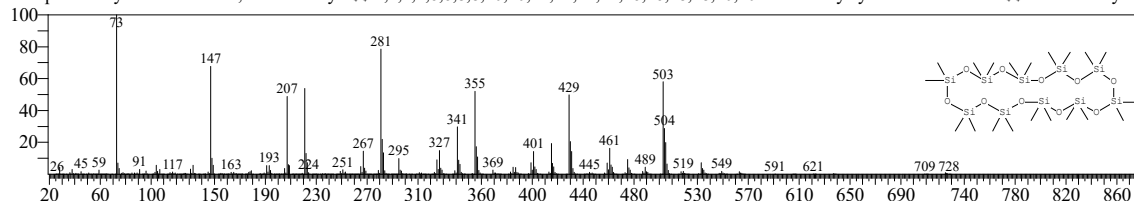

Hit#:4 Entry:402 Library:OA\_TMS\_DB5\_67min\_V3.lib

SI:61 Formula:C<sub>20</sub>H<sub>42</sub>O<sub>4</sub>Si<sub>4</sub> CAS:775-01-9 MolWeight:458 RetIndex:1942

CompName:3,4-Dihydroxymandelic acid-4TMS ; 2-(3,4-dihydroxyphenyl)-2-hydroxyacetic acid

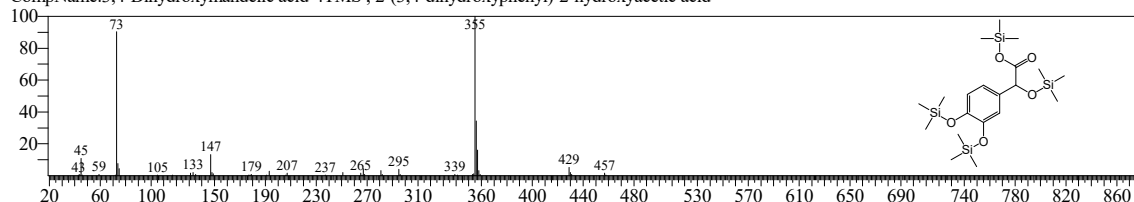

Hit#:5 Entry:343 Library:OA\_TMS\_DB5\_67min\_V3.lib

SI:49 Formula:C<sub>18</sub>H<sub>37</sub>NO<sub>3</sub>Si<sub>3</sub> CAS:51-43-4 MolWeight:399 RetIndex:1868

CompName:Epinephrine-3TMS ; 4-[(1R)-1-hydroxy-2-(methylamino)ethyl]benzene-1,2-diol

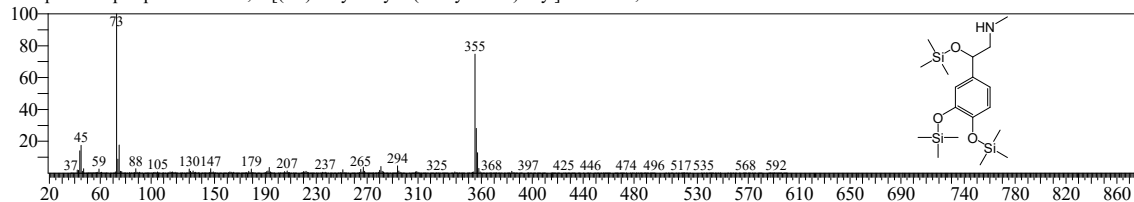

# TNAU

<< Target >>

Line#:20 R.Time:44.165(Scan#:7834) MassPeaks:382

RawMode:Averaged 44.160-44.170(7833-7835) BasePeak:59.05(1265)

BG Mode:Calc. from Peak Group 1 - Event 1 Q3 Scan

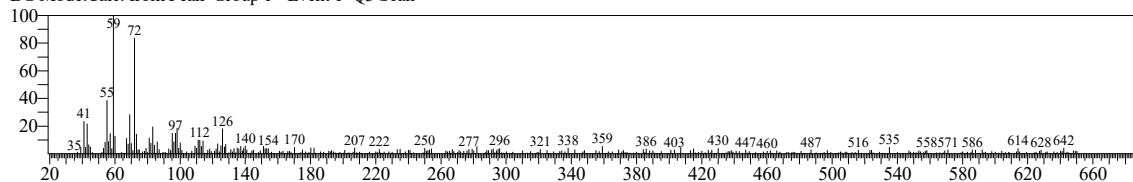

Hit#:1 Entry:38689 Library:NIST20R.lib

SI:89 Formula:C22H43NO CAS:112-84-5 MolWeight:337 RetIndex:2625

CompName:13-Docosenamide, (Z)- \$\$ Erucylamide \$\$ Erucyl amide \$\$ (Z)-13-Docosenamide \$\$ 13-Docosenamide, cis- \$\$ Armid E \$\$ cis-13-Docosenan

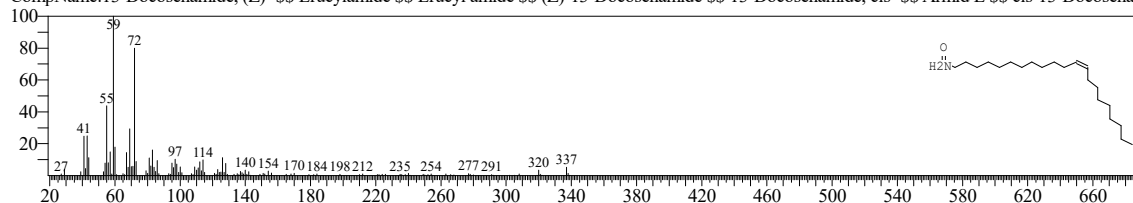

Hit#:2 Entry:34121 Library:NIST20R.lib

SI:88 Formula:C18H35NO CAS:301-02-0 MolWeight:281 RetIndex:2228

CompName:9-Octadecenamide, (Z)- \$\$ Adogen 73 \$\$ Oleamide \$\$ Oleic acid amide \$\$ Oleyl amide \$\$ Slip-eze \$\$ Armoslip CP \$\$ Crodamide O \$\$ Crode

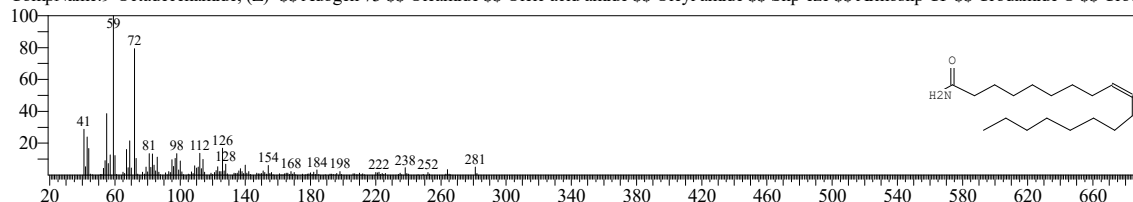

Hit#:3 Entry:108453 Library:NIST20M1.lib

SI:85 Formula:C16H31NO CAS:106010-22-4 MolWeight:253 RetIndex:2029

CompName:Palmitoleamide \$\$ 9-Hexadecenamide, (9Z)- \$\$ 9-Hexadecenamide, (Z)- \$\$ (Z)-Hexadec-9-enamide

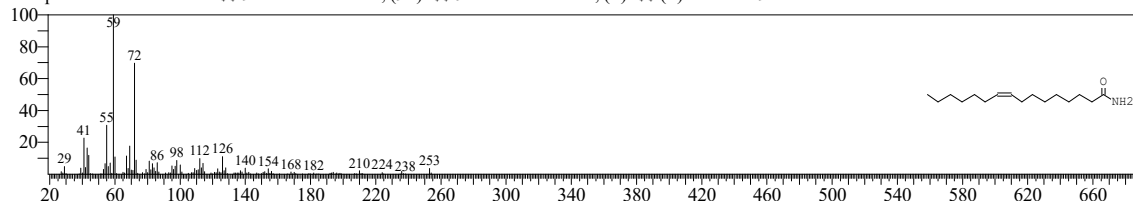

Hit#:4 Entry:140706 Library:NIST20M1.lib

SI:81 Formula:C18H35NO CAS:3322-62-1 MolWeight:281 RetIndex:2228

CompName:9-Octadecenamide \$\$ Armid ow \$\$ Armoslip cp \$\$ 9-Oleoamide

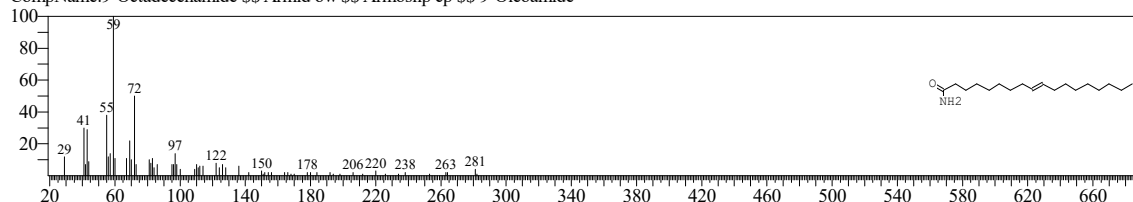

Hit#:5 Entry:44970 Library:NIST20M2.lib

SI:76 Formula:C45H86N2O2 CAS:10436-19-8 MolWeight:686 RetIndex:5311

CompName:Bis(cis-13-docosenamido)methane \$\$ (13Z)-N-([(13Z)-13-Docosenoylamino]methyl)-13-docosenamide #

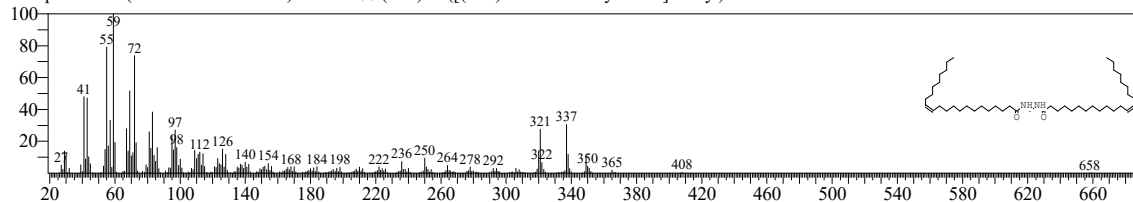

# TNAU

<< Target >>

Line#:21 R.Time:45.595(Scan#:8120) MassPeaks:491

RawMode:Averaged 45.590-45.600(8119-8121) BasePeak:139.10(7344)

BG Mode:Calc. from Peak Group 1 - Event 1 Q3 Scan

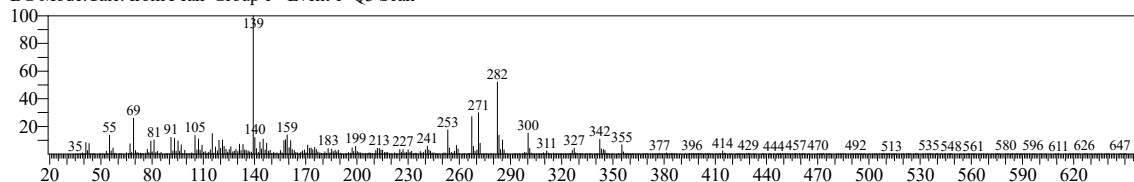

Hit#:1 Entry:8297 Library:NIST20M2.lib

SI:91 Formula:C27H42O3 CAS:512-04-9 MolWeight:414 RetIndex:2844

CompName:Diosgenin \$\$ Spirost-5-en-3-ol, (3.beta.,25R)- \$\$ Spirost-5-en-3.beta.-ol, (25R)- \$\$ Nitrogenin \$\$ 25D-spirost-5-en-3.beta.-ol \$\$ Spiro(8H-nap

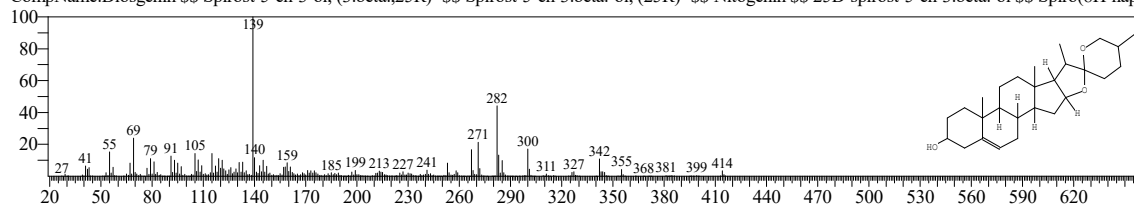

Hit#:2 Entry:14852 Library:NIST20M2.lib

SI:81 Formula:C28H44O3 CAS:116292-24-1 MolWeight:428 RetIndex:2793

CompName:Diosgenin methyl ether \$\$ Diosgenin Me derivative \$\$ (3.beta.,25R)-3-Methoxyspirost-5-ene \$\$ Spirost-5-ene, 3-methoxy-, (3.beta.,25R)-

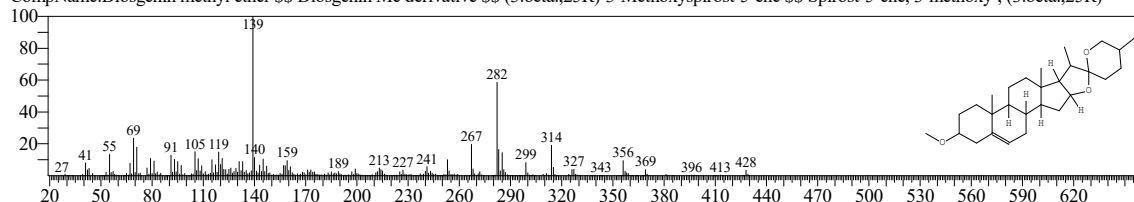

Hit#:3 Entry:41561 Library:NIST20R.lib

SI:81 Formula:C27H42O2 CAS:32277-73-9 MolWeight:398 RetIndex:2713

CompName:Des-N-solasodine \$\$ Furosta-5,20(22)-dien-3-ol #

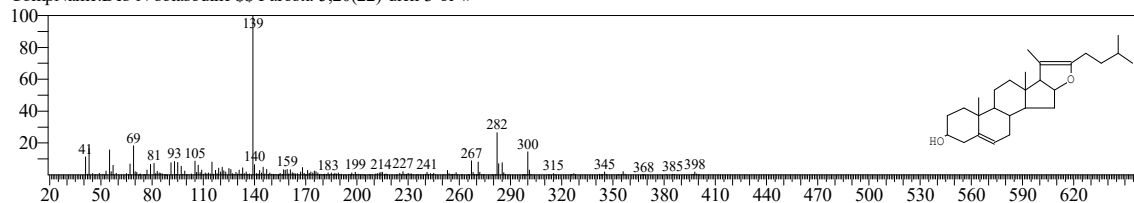

Hit#:4 Entry:24878 Library:NIST20M2.lib

SI:79 Formula:C29H44O4 CAS:1061-54-7 MolWeight:456 RetIndex:2984

CompName:Spirost-5-en-3-ol, acetate, (3.beta.,25R)- \$\$ Diosgenin acetate \$\$ Spirost-5-en-3.beta.-ol, acetate, (25R)- \$\$ Spirost-5-en-3.beta.-ol, acetate, (2

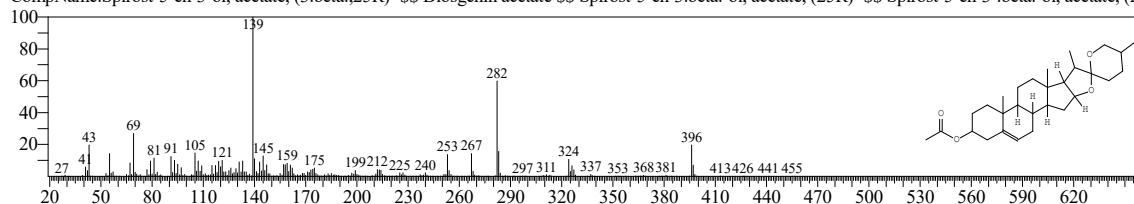

Hit#:5 Entry:42677 Library:NIST20R.lib

SI:76 Formula:C29H44O4 CAS:1180-12-7 MolWeight:456 RetIndex:2984

CompName:Neodiosgenin (3.beta.,25S) acetate \$\$ Spirost-5-en-3-ol, 3-acetate, (3.beta.,25S)- \$\$ Spirost-5-en-3-ol, acetate, (3.beta.,25S)- \$\$ Spirost-5-en-3

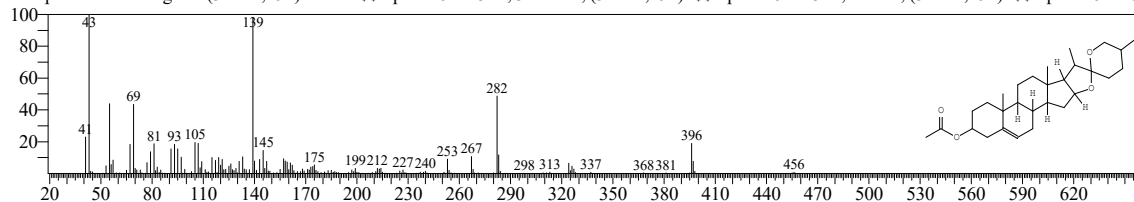

Supplement: Supplementary file 22 [file supplementary]
