# Supplementary material for: Comparative Metabolomics Profiling Reveals Key Metabolites and Associated Pathways Regulating Tuber Dormancy in White Yam (<em>Dioscorea rotundata</em>)
Source: Preprints.org preprint supplement (doi:10.20944/preprints202303.0378.v1), 2023-03-21

# TNAU

## Sample Information

Analyzed by : Admin  
 Analyzed : 02-Sep-22 12:55:30 PM  
 Sample Type : Unknown  
 Level # : 1  
 Sample Name : Sample  
 Sample ID : 8-1  
 IS Amount : [1]=1  
 Sample Amount : 1  
 Dilution Factor : 1  
 Vial # : 9  
 Injection Volume : 5.00  
 Data File : D:\GCMS-8040NX\Sep 2022\Users\01.09.2022\010920222023.qgd  
 Org Data File : D:\GCMS-8040NX\Sep 2022\Users\01.09.2022\010920222023.qgd  
 Method File : D:\GCMS-8040NX\Sep 2022\Method\Scan\_methodfile.qgm  
 Org Method File : D:\GCMS-8040NX\Sep 2022\Method\Scan\_methodfile.qgm  
 Report File :  
 Tuning File : D:\GCMS-8040NX\Aug 2022\Tuning Data\TUNING 25082022.qgt  
 Modified by : Admin  
 Modified : 05-Sep-22 11:05:56 AM

Chromatogram Sample D:\GCMS-8040NX\Sep 2022\Users\01.09.2022\010920222023.qgd

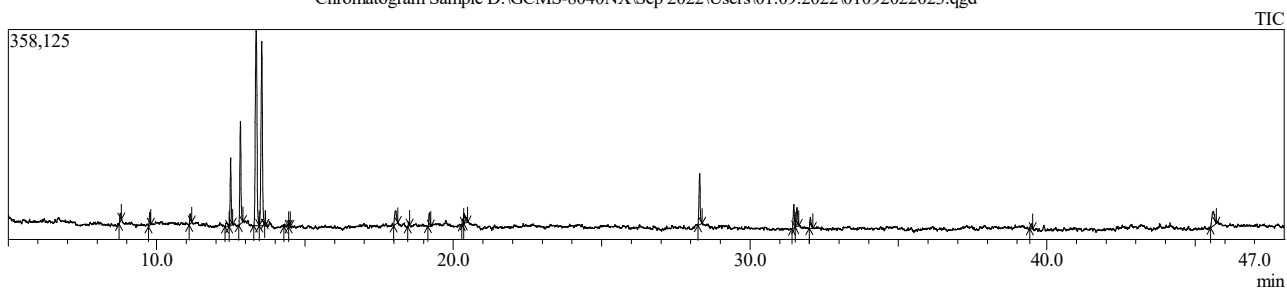

## Peak Report TIC

| Peak# | R.Time | Area    | Area%  | Height  | Height% | A/H  | Similarity | Name                                           |
|-------|--------|---------|--------|---------|---------|------|------------|------------------------------------------------|
| 1     | 8.781  | 39165   | 0.91   | 14160   | 1.09    | 2.77 | 83         | 1-Butanol, 3-methyl-, acetate                  |
| 2     | 9.773  | 46517   | 1.08   | 22381   | 1.72    | 2.08 | 94         | Pentasiloxane, dodecamethyl-                   |
| 3     | 11.132 | 43377   | 1.01   | 17303   | 1.33    | 2.51 | 41         | Methyl myristoleate                            |
| 4     | 12.335 | 32310   | 0.75   | 5526    | 0.42    | 5.85 | 19         | Methyl butanoate                               |
| 5     | 12.496 | 283885  | 6.60   | 115607  | 8.87    | 2.46 | 75         | 1,3-Benzodioxol-5-ol                           |
| 6     | 12.824 | 456603  | 10.61  | 175366  | 13.45   | 2.60 | 74         | 1,3-Benzodioxol-5-ol                           |
| 7     | 13.356 | 1290996 | 30.01  | 334453  | 25.66   | 3.86 | 53         | Methyl cis-13,16-Docosadienate                 |
| 8     | 13.546 | 1080258 | 25.11  | 314703  | 24.14   | 3.43 | 53         | Methyl cis-13,16-Docosadienate                 |
| 9     | 13.655 | 1137    | 0.03   | 2772    | 0.21    | 0.41 | 12         | Kynurenic acid-2TMS                            |
| 10    | 14.310 | 16283   | 0.38   | 3140    | 0.24    | 5.19 | 20         | Methyl butanoate                               |
| 11    | 14.472 | 22495   | 0.52   | 10937   | 0.84    | 2.06 | 74         | 5-(4-Methylbenzyl)-1,3,4-thiadiazol-2-amine    |
| 12    | 18.063 | 107362  | 2.50   | 22717   | 1.74    | 4.73 | 93         | .beta.-D-Glucopyranose, 1,6-anhydro-           |
| 13    | 18.504 | 14339   | 0.33   | 6509    | 0.50    | 2.20 | 84         | Pentanoic acid, 5-hydroxy-, 2,4-di-t-butylphen |
| 14    | 19.194 | 56718   | 1.32   | 22639   | 1.74    | 2.51 | 91         | 2,4-Di-tert-butylphenoxytrimethylsilane        |
| 15    | 20.305 | 29399   | 0.68   | 7697    | 0.59    | 3.82 | 44         | Isovalerylglycine-TMS                          |
| 16    | 20.363 | 71159   | 1.65   | 16958   | 1.30    | 4.20 | 42         | 2-Ketoisocaproic acid-meto-TMS(1)              |
| 17    | 28.301 | 245655  | 5.71   | 86914   | 6.67    | 2.83 | 95         | n-Hexadecanoic acid                            |
| 18    | 31.476 | 114137  | 2.65   | 40059   | 3.07    | 2.85 | 95         | 10E,12Z-Octadecadienoic acid                   |
| 19    | 31.583 | 103252  | 2.40   | 32151   | 2.47    | 3.21 | 88         | cis-9-Hexadecenal                              |
| 20    | 32.031 | 60261   | 1.40   | 18770   | 1.44    | 3.21 | 91         | Octadecanoic acid                              |
| 21    | 39.494 | 28573   | 0.66   | 8370    | 0.64    | 3.41 | 56         | Methyl erucate                                 |
| 22    | 45.613 | 157765  | 3.67   | 24332   | 1.87    | 6.48 | 89         | Diosgenin                                      |
|       |        | 4301646 | 100.00 | 1303464 | 100.00  |      |            |                                                |

# TNAU

Library

<< Target >>

Line#:1 R.Time:8.780(Scan#:757) MassPeaks:338

RawMode:Averaged 8.775-8.785(756-758) BasePeak:43.05(2769)

BG Mode:Calc. from Peak Group 1 - Event 1 Q3 Scan

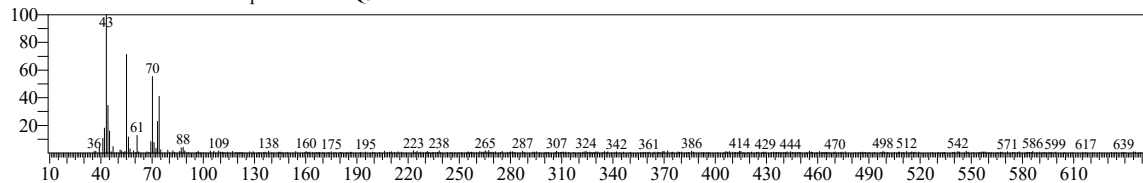

Hit#:1 Entry:6784 Library:NIST20R.lib

SI:83 Formula:C7H14O2 CAS:123-92-2 MolWeight:130 RetIndex:820

CompName:1-Butanol, 3-methyl-, acetate \$\$ Isopentyl alcohol, acetate \$\$ Acetic acid, 3-methylbutyl ester \$\$ Banana oil \$\$ Isoamyl acetate \$\$ Isoamyl etha

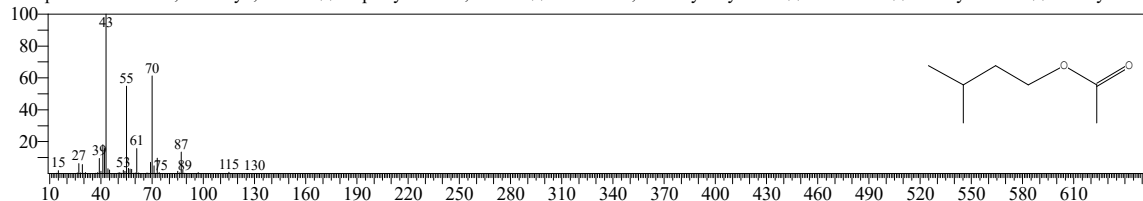

Hit#:2 Entry:8685 Library:NIST20M1.lib

SI:80 Formula:C7H14O2 CAS:628-63-7 MolWeight:130 RetIndex:884

CompName:Acetic acid, pentyl ester \$\$ n-Amyl acetate \$\$ n-Pentyl acetate \$\$ Amyl acetate \$\$ Birnenöl \$\$ Pentyl acetate \$\$ Acetic acid, amyl ester \$\$ An

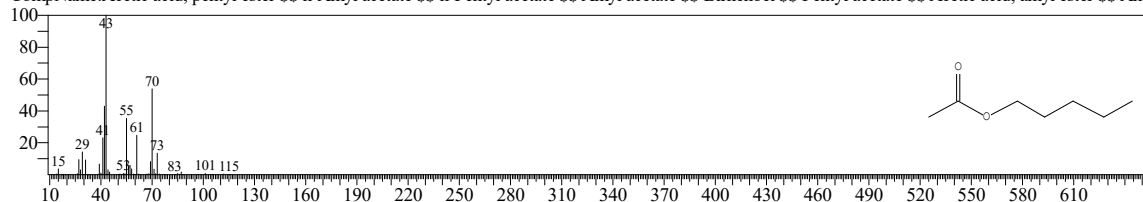

Hit#:3 Entry:6819 Library:NIST20R.lib

SI:80 Formula:C7H14O2 CAS:624-41-9 MolWeight:130 RetIndex:820

CompName:1-Butanol, 2-methyl-, acetate \$\$ 2-Methyl-1-butyl acetate \$\$ 2-Methylbutyl acetate \$\$ Acetic acid 2-methylbutyl ester \$\$ 2-Methylbutyl acetate :

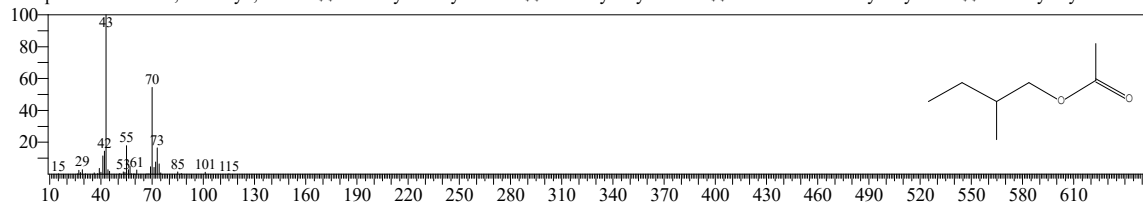

Hit#:4 Entry:4411 Library:NIST20R.lib

SI:78 Formula:C6H12O2 CAS:110-45-2 MolWeight:116 RetIndex:818

CompName:1-Butanol, 3-methyl-, formate \$\$ Isopentyl alcohol, formate \$\$ Isoamyl formate \$\$ Isoamyl methanoate \$\$ Isopentyl formate \$\$ 3-Methylbutyl

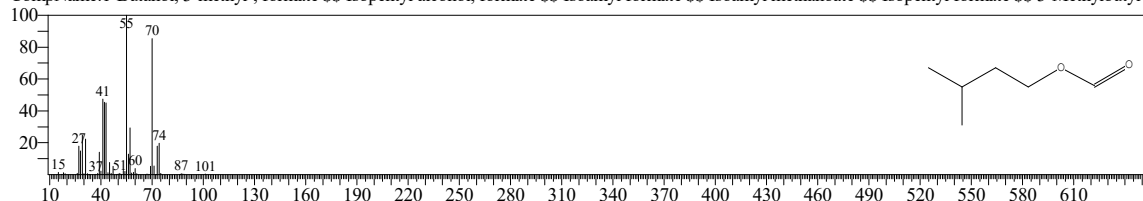

Hit#:5 Entry:1220 Library:NIST20R.lib

SI:77 Formula:C4H8O2 CAS:590-90-9 MolWeight:88 RetIndex:798

CompName:CH3C(O)CH2CH2OH \$\$ Methylolacetone \$\$ Monomethylolacetone \$\$ 3-Ketobutan-1-ol \$\$ 3-Oxo-1-butanol \$\$ 3-Oxobutanol \$\$ 4-Butanol-

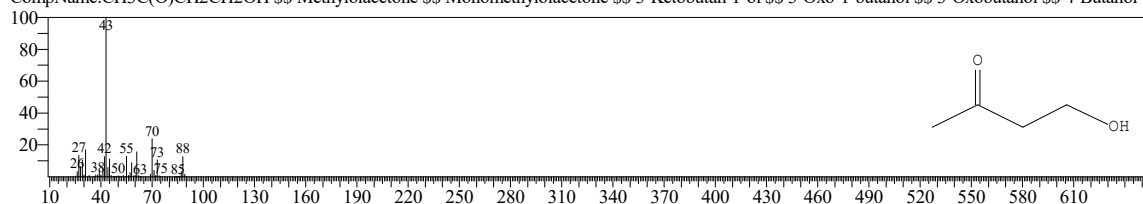

# TNAU

<< Target >>

Line#:2 R.Time:9.770(Scan#:955) MassPeaks:410

RawMode:Averaged 9.765-9.775(954-956) BasePeak:281.05(4664)

BG Mode:Calc. from Peak Group 1 - Event 1 Q3 Scan

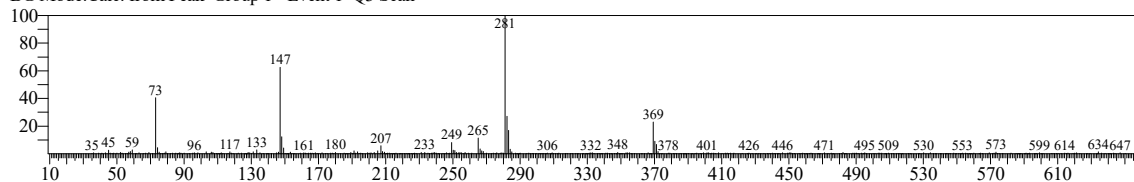

Hit#:1 Entry:40975 Library:NIST20R.lib

SI:94 Formula:C<sub>12</sub>H<sub>36</sub>O<sub>4</sub>Si<sub>5</sub> CAS:141-63-9 MolWeight:384 RetIndex:1068

CompName:Pentasiloxane, dodecamethyl- \$\$ Dodecamethylpentasiloxane \$\$ 1,1,1,3,3,5,5,7,7,9,9-Dodecamethylpentasiloxane #

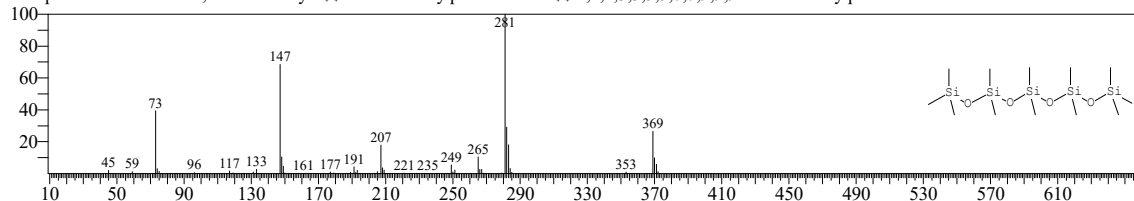

Hit#:2 Entry:249272 Library:NIST20M1.lib

SI:83 Formula:C<sub>12</sub>H<sub>36</sub>O<sub>4</sub>Si<sub>5</sub> CAS:3555-47-3 MolWeight:384 RetIndex:1068

CompName:Trisiloxane, 1,1,1,5,5,5-hexamethyl-3,3-bis[(trimethylsilyl)oxy]- \$\$ Tetrakis(trimethylsiloxy)silane \$\$ Trisiloxane, 1,1,1,5,5,5-hexamethyl-3,3-b

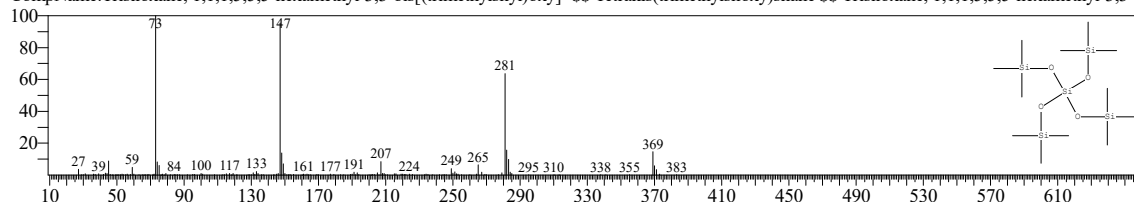

Hit#:3 Entry:27848 Library:NIST20M2.lib

SI:81 Formula:C<sub>18</sub>H<sub>48</sub>O<sub>4</sub>Si<sub>5</sub> CAS:0-00-0 MolWeight:468 RetIndex:1495

CompName:1,1,3,5,7,9-Pentasiloxane, 1,1,3,3,5,5,7,7,9,9-decamethyl-1,9-di(tert.butyl)-

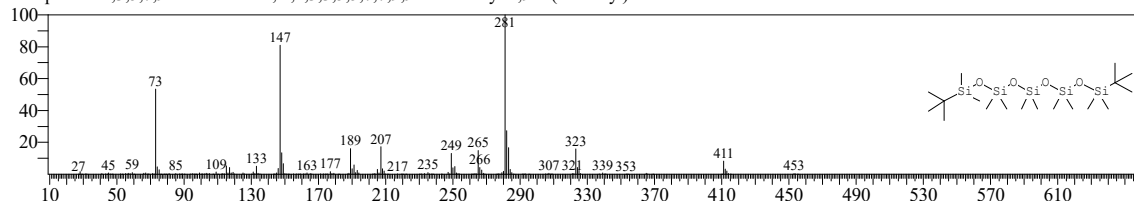

Hit#:4 Entry:249271 Library:NIST20M1.lib

SI:79 Formula:C<sub>12</sub>H<sub>36</sub>O<sub>4</sub>Si<sub>5</sub> CAS:38146-99-5 MolWeight:384 RetIndex:1068

CompName:1,1,1,3,5,5,7,7-Nonamethyl-3-(trimethylsiloxy)tetrasiloxane \$\$ 1,1,1,3,3,5,5,7,7-Nonamethyl-5-[(trimethylsilyl)oxy]tetrasiloxane #

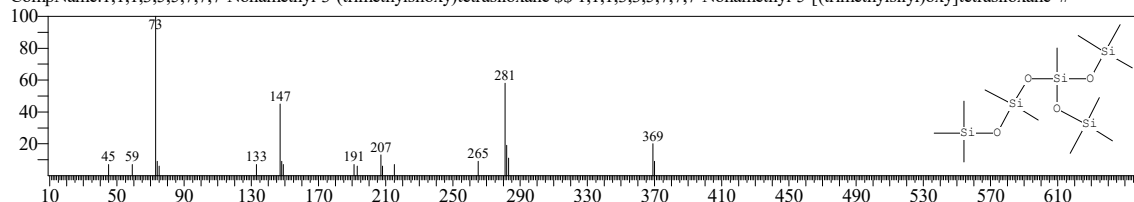

Hit#:5 Entry:158097 Library:NIST20M1.lib

SI:76 Formula:C<sub>14</sub>H<sub>24</sub>O<sub>3</sub>Si<sub>2</sub> CAS:0-00-0 MolWeight:296 RetIndex:1625

CompName:2,6-Dihydroxyacetophenone, 2TMS derivative \$\$ 2',6'-Dihydroxyacetophenone, bis(trimethylsilyl) ether

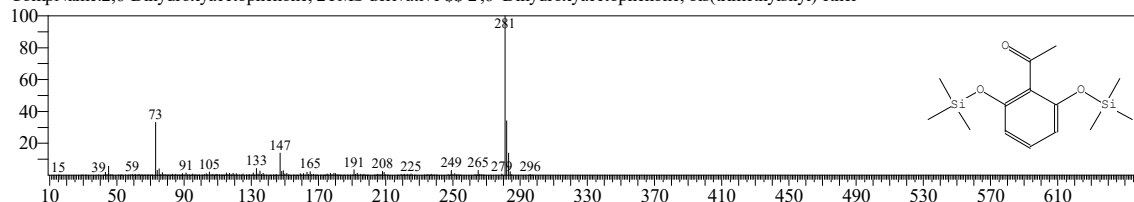

# TNAU

<< Target >>

Line#:3 R.Time:11.130(Scan#:1227) MassPeaks:359

RawMode:Averaged 11.125-11.135(1226-1228) BasePeak:69.05(2046)

BG Mode:Calc. from Peak Group 1 - Event 1 Q3 Scan

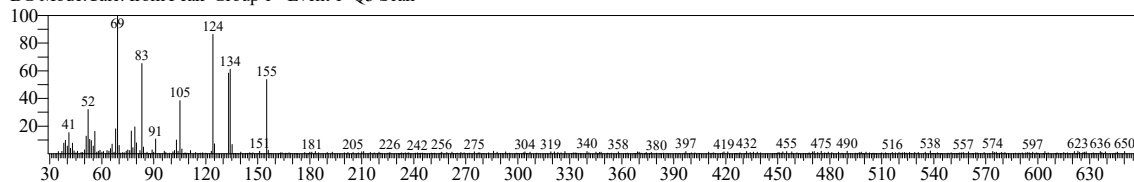

Hit#:1 Entry:9 Library:FA\_ME\_SP2560\_EI\_V3.lib

SI:41 Formula:C15H28O2 CAS:544-64-9 MolWeight:240 RetIndex:2283

CompName:Methyl myristoleate ; ; (Z)-tetradec-9-enoic acid

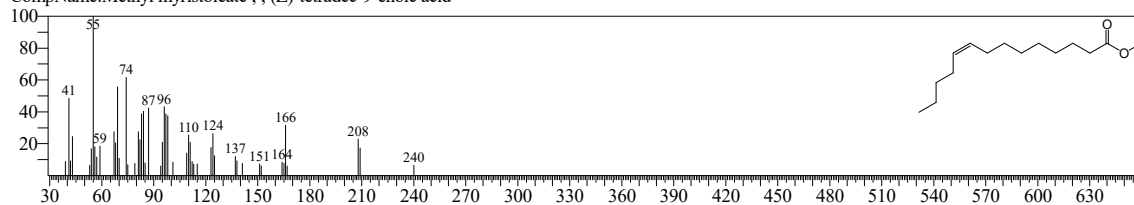

Hit#:2 Entry:24 Library:FA\_ME\_SP2560\_EI\_V3.lib

SI:39 Formula:C21H40O2 CAS:5561-99-9 MolWeight:324 RetIndex:2874

CompName:Methyl cis-11-icosenoate ; ; Icos-11-enoic acid

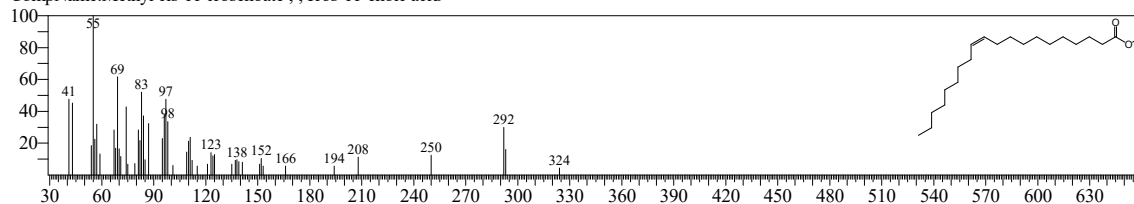

Hit#:3 Entry:13 Library:FA\_ME\_SP2560\_EI\_V3.lib

SI:39 Formula:C17H32O2 CAS:373-49-9 MolWeight:268 RetIndex:2478

CompName:Methyl palmitoleate ; Hexadec-9-enoic acid

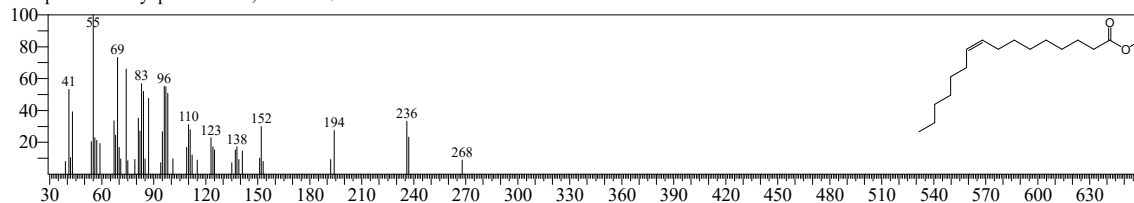

Hit#:4 Entry:11 Library:FA\_ME\_SP2560\_EI\_V3.lib

SI:39 Formula:C16H30O2 CAS:84743-29-3 MolWeight:254 RetIndex:2388

CompName:Methyl cis-10-pentadecenoate ; (Z)-pentadec-10-enoic acid

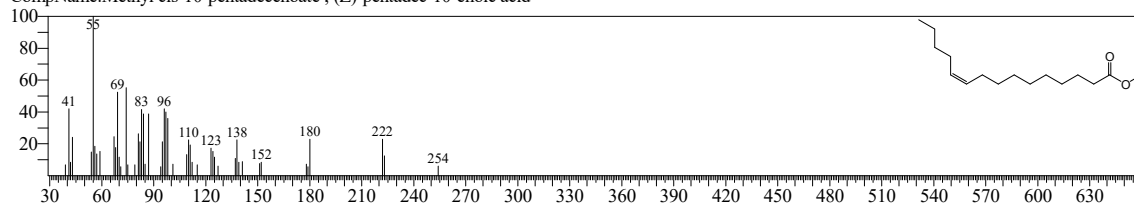

Hit#:5 Entry:15 Library:FA\_ME\_SP2560\_EI\_V3.lib

SI:39 Formula:C18H34O2 CAS:29743-97-3 MolWeight:282 RetIndex:2581

CompName:Methyl cis-10-heptadecenoate ; Heptadec-10-enoic acid

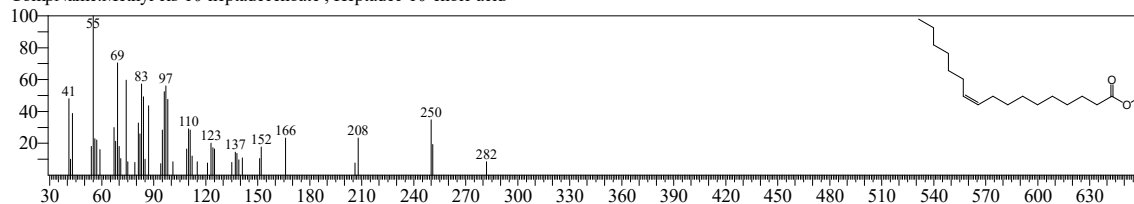

# TNAU

<< Target >>

Line#:4 R.Time:12.335(Scan#:1468) MassPeaks:397

RawMode:Averaged 12.330-12.340(1467-1469) BasePeak:72.00(118)

BG Mode:Calc. from Peak Group 1 - Event 1 Q3 Scan

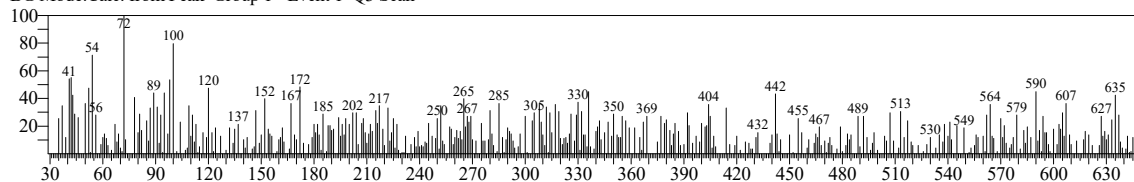

Hit#:1 Entry:1 Library:FA\_ME\_SP2560\_EI\_V3.lib

SI:19 Formula:C5H10O2 CAS:107-92-6 MolWeight:102 RetIndex:1113

CompName:Methyl butanoate ; Butanoic acid

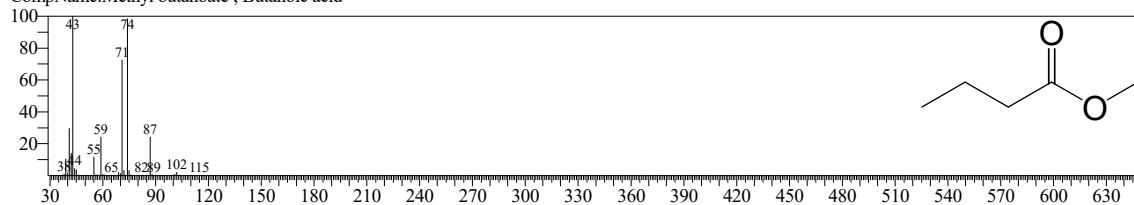

Hit#:2 Entry:456 Library:OA\_TMS\_DB5\_67min\_V3.lib

SI:18 Formula:C18H33NO3Si CAS:37350-58-6 MolWeight:339 RetIndex:2094

CompName:Metoprolol-TMS ; 1-[4-(2-methoxyethyl)phenoxy]-3-(propan-2-ylamino)propan-2-ol

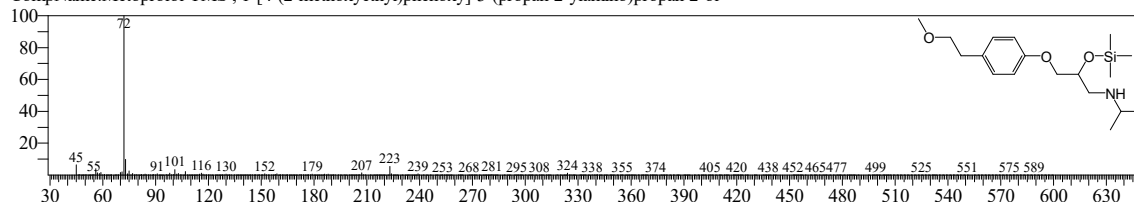

Hit#:3 Entry:310 Library:OA\_TMS\_DB5\_67min\_V3.lib

SI:17 Formula:C11H20N4OSi2 CAS:68-94-0 MolWeight:280 RetIndex:1822

CompName:Hypoxanthine-2TMS ; 3,7-dihydropurin-6-one

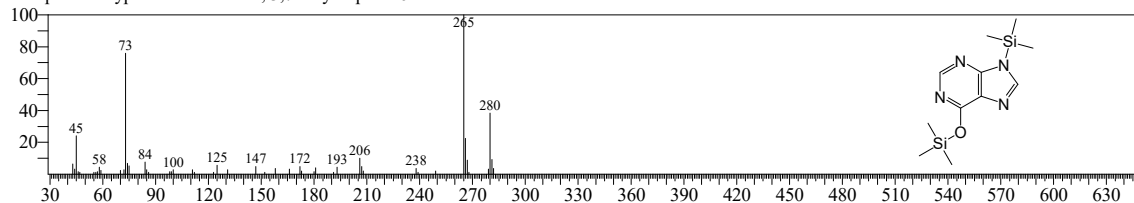

Hit#:4 Entry:345 Library:OA\_TMS\_DB5\_67min\_V3.lib

SI:15 Formula:C21H52O6Si5 CAS:59-23-4 MolWeight:540 RetIndex:1868

CompName:Galactose-5TMS(2) ; (3R,4S,5R,6R)-6-(hydroxymethyl)oxane-2,3,4,5-tetrol

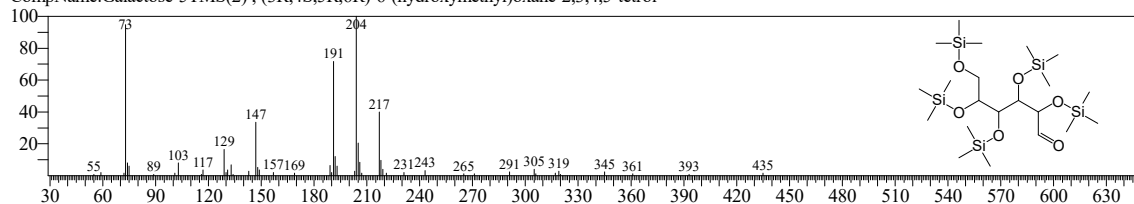

Hit#:5 Entry:349 Library:OA\_TMS\_DB5\_67min\_V3.lib

SI:15 Formula:C21H52O6Si5 CAS:2595-97-3 MolWeight:540 RetIndex:1874

CompName:Allose-5TMS ; (2R,3R,4R,5R)-2,3,4,5,6-pentahydroxyhexanal

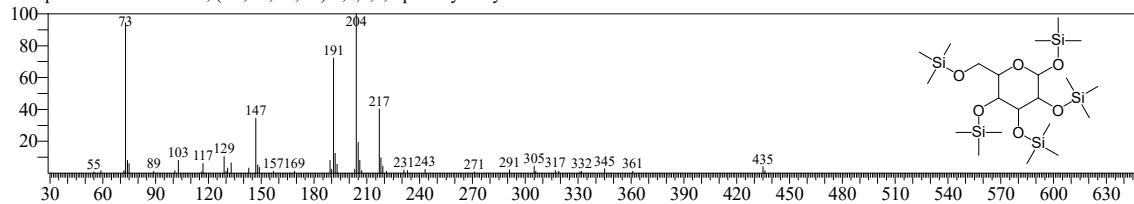

# TNAU

<< Target >>

Line#5 R.Time:12.495(Scan#:1500) MassPeaks:402

RawMode:Averaged 12.490-12.500(1499-1501) BasePeak:138.05(40091)

BG Mode:Calc. from Peak Group 1 - Event 1 Q3 Scan

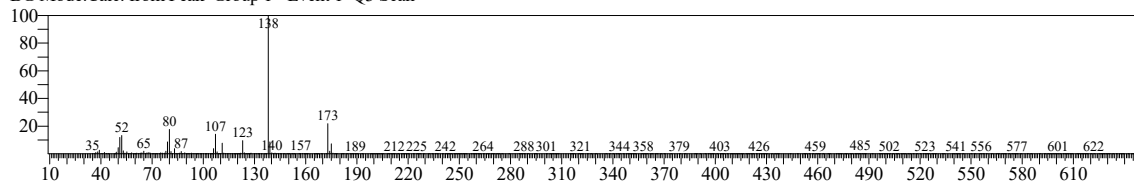

Hit#1 Entry:11187 Library:NIST20M1.lib

SI:75 Formula:C7H6O3 CAS:533-31-3 MolWeight:138 RetIndex:1245

CompName:1,3-Benzodioxol-5-ol \$ Phenol, 3,4-(methylenedioxy)- \$ Sesamol \$ 3,4-(Methylenedioxy)phenol \$ 5-Hydroxy-1,3-benzodioxole \$ Methy

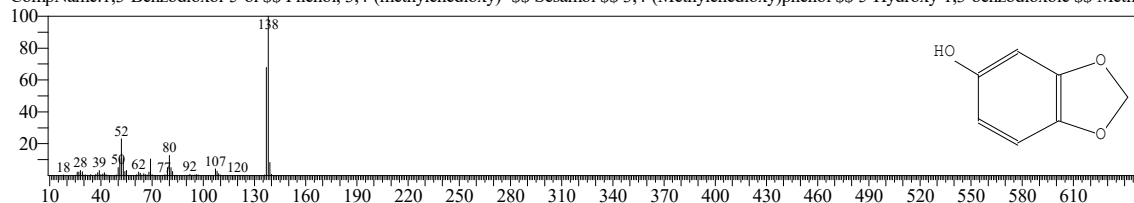

Hit#2 Entry:8360 Library:NIST20R.lib

SI:73 Formula:C6H6N2O2 CAS:105-11-3 MolWeight:138 RetIndex:1349

CompName:2,5-Cyclohexadiene-1,4-dione, dioxime \$ p-Benzoquinone, dioxime \$ p-Quinone dioxime \$ p-Quinone oxime \$ Benzoquinone dioxime \$

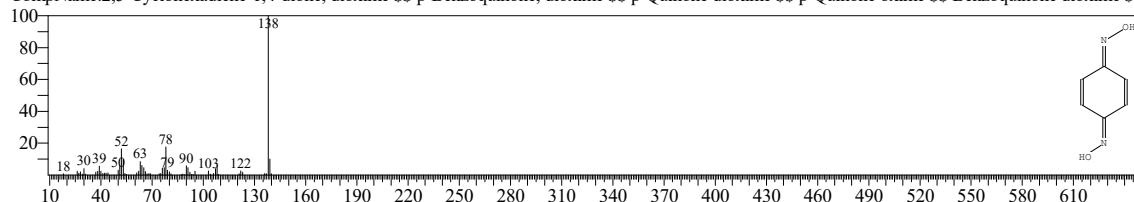

Hit#3 Entry:11188 Library:NIST20M1.lib

SI:73 Formula:C7H6O3 CAS:69393-72-2 MolWeight:138 RetIndex:1245

CompName:2,3-Methylenedioxyphenol \$ 1,3-Benzodioxol-4-ol #

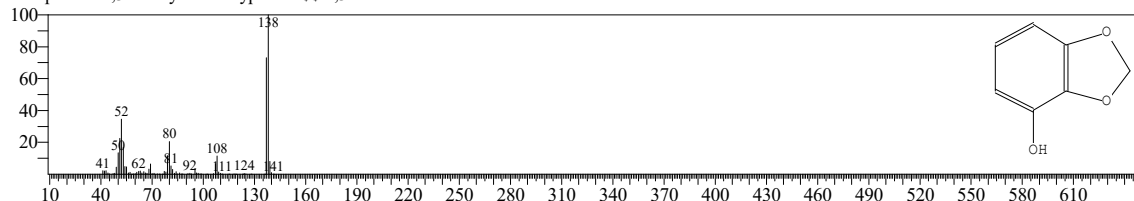

Hit#4 Entry:11222 Library:NIST20M1.lib

SI:71 Formula:C7H10N2O CAS:3471-32-7 MolWeight:138 RetIndex:1325

CompName:Hydrazine, (4-methoxyphenyl)- \$ (p-Methoxyphenyl)hydrazine \$ 1-(4-Methoxyphenyl)hydrazine #

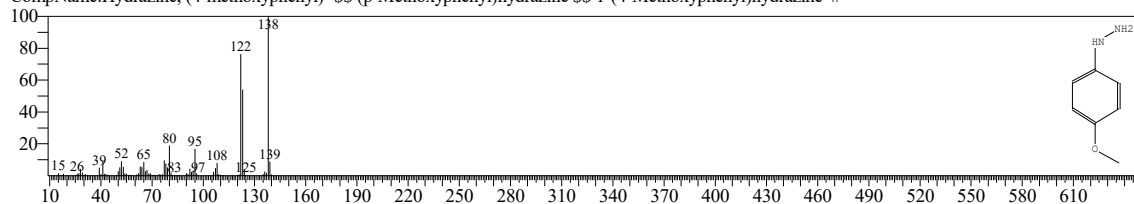

Hit#5 Entry:8422 Library:NIST20R.lib

SI:71 Formula:C7H10N2O CAS:25680-58-4 MolWeight:138 RetIndex:1070

CompName:2-Ethyl-3-methoxypyrazine \$ 2-Methoxy-3-ethylpyrazine \$ Pyrazine, 2-ethyl-3-methoxy- \$ 3-Ethyl-2-methoxypyrazine \$ Pyrazine, 3-ethyl-

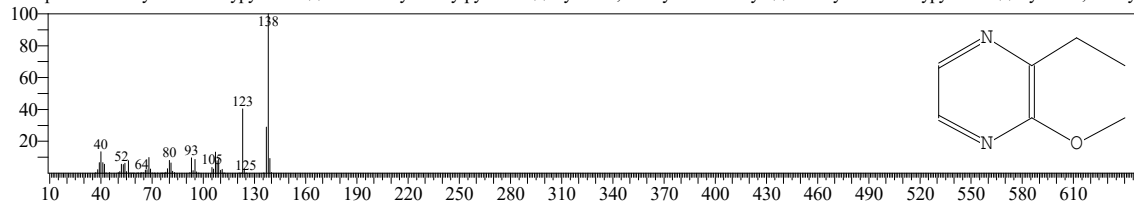

# TNAU

<< Target >>

Line#6 R.Time:12.825(Scan#:1566) MassPeaks:320

RawMode:Averaged 12.820-12.830(1565-1567) BasePeak:138.05(60785)

BG Mode:Calc. from Peak Group 1 - Event 1 Q3 Scan

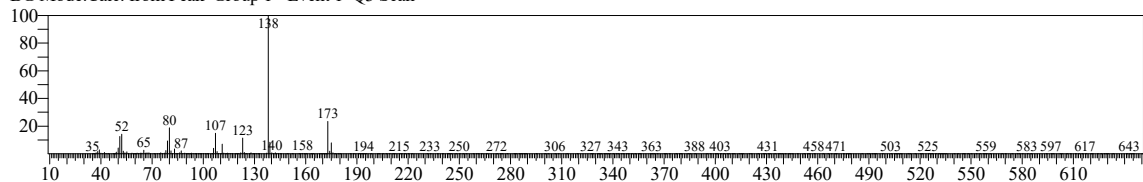

Hit#:1 Entry:11187 Library:NIST20M1.lib

SI:74 Formula:C7H6O3 CAS:533-31-3 MolWeight:138 RetIndex:1245

CompName:1,3-Benzodioxol-5-ol \$\$ Phenol, 3,4-(methylenedioxy)- \$\$ Sesamol \$\$ 3,4-(Methylenedioxy)phenol \$\$ 5-Hydroxy-1,3-benzodioxole \$\$ Methy



Hit#:2 Entry:8360 Library:NIST20R.lib

SI:73 Formula:C6H6N2O2 CAS:105-11-3 MolWeight:138 RetIndex:1349

CompName:2,5-Cyclohexadiene-1,4-dione, dioxime \$\$ p-Benzoquinone, dioxime \$\$ p-Quinone dioxime \$\$ p-Quinone oxime \$\$ Benzoquinone dioxime \$\$



Hit#:3 Entry:11188 Library:NIST20M1.lib

SI:72 Formula:C7H6O3 CAS:69393-72-2 MolWeight:138 RetIndex:1245

CompName:2,3-Methylenedioxyphenol \$\$ 1,3-Benzodioxol-4-ol #



Hit#:4 Entry:8422 Library:NIST20R.lib

SI:71 Formula:C7H10N2O CAS:25680-58-4 MolWeight:138 RetIndex:1070

CompName:2-Ethyl-3-methoxypyrazine \$\$ 2-Methoxy-3-ethylpyrazine \$\$ Pyrazine, 2-ethyl-3-methoxy- \$\$ 3-Ethyl-2-methoxypyrazine \$\$ Pyrazine, 3-ethyl-

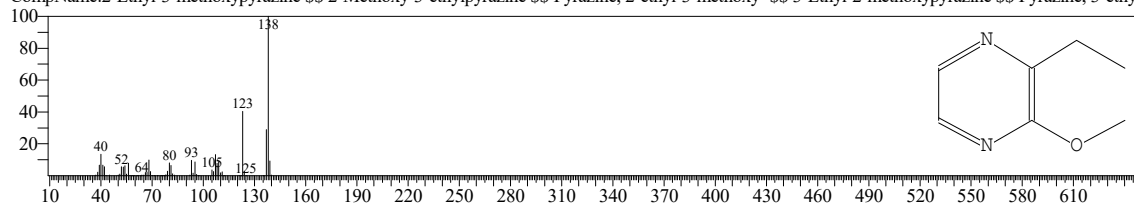

Hit#:5 Entry:11222 Library:NIST20M1.lib

SI:70 Formula:C7H10N2O CAS:3471-32-7 MolWeight:138 RetIndex:1325

CompName:Hydrazine, (4-methoxyphenyl)- \$\$ (p-Methoxyphenyl)hydrazine \$\$ 1-(4-Methoxyphenyl)hydrazine #

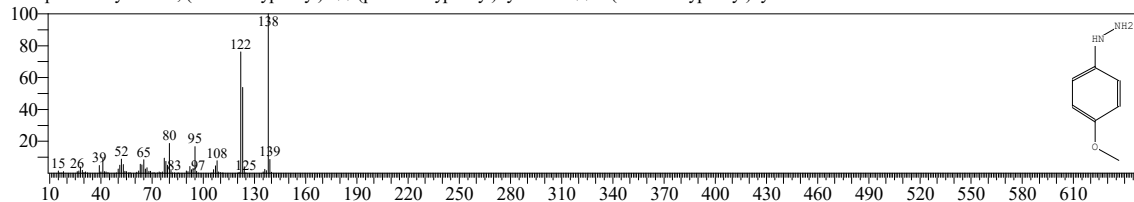

# TNAU

<< Target >>

Line#:7 R.Time:13.355(Scan#:1672) MassPeaks:358

RawMode:Averaged 13.350-13.360(1671-1673) BasePeak:155.05(55664)

BG Mode:Calc. from Peak Group 1 - Event 1 Q3 Scan

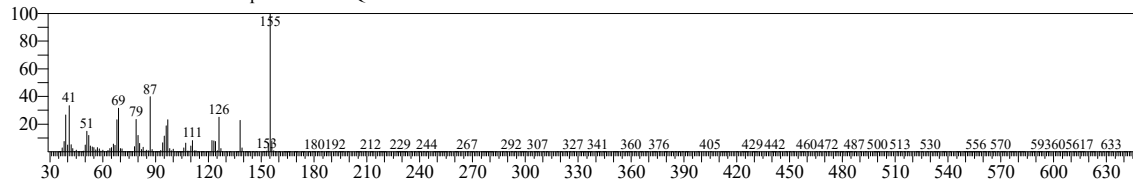

Hit#:1 Entry:34 Library:FA\_ME\_SP2560\_EI\_V3.lib

SI:53 Formula:C23H42O2 CAS:7370-49-2 MolWeight:350 RetIndex:3169

CompName:Methyl cis-13,16-Docosadienate ; (13Z,16E)-docosa-13,16-dienoic acid

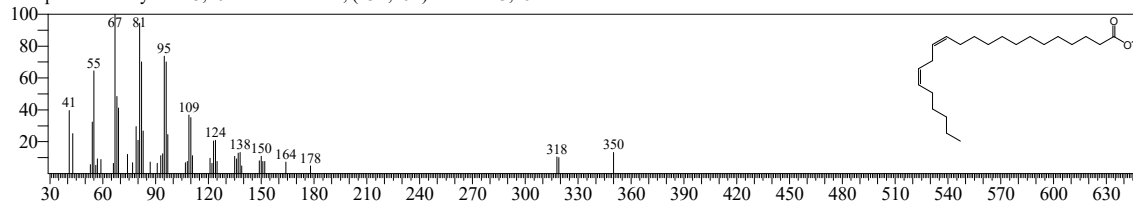

Hit#:2 Entry:21 Library:FA\_ME\_SP2560\_EI\_V3.lib

SI:52 Formula:C19H34O2 CAS:60-33-3 MolWeight:294 RetIndex:2775

CompName:Methyl linoleate ; Octadeca-9,12-dienoic acid

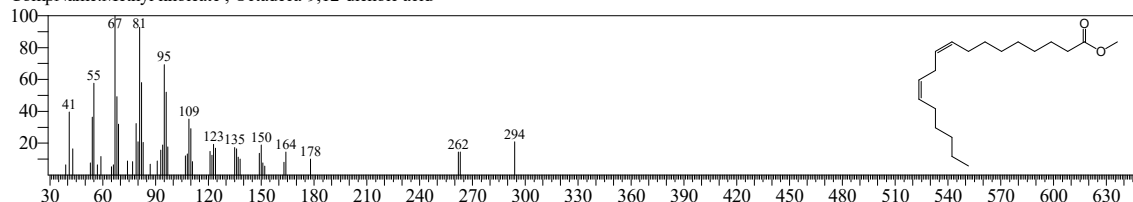

Hit#:3 Entry:20 Library:FA\_ME\_SP2560\_EI\_V3.lib

SI:51 Formula:C19H34O2 CAS:506-21-8 MolWeight:294 RetIndex:2727

CompName:Methyl linolelaidate ; (9E,12E)-octadeca-9,12-dienoic acid

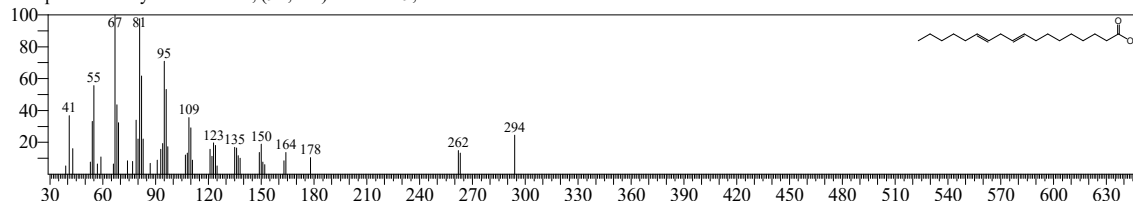

Hit#:4 Entry:11 Library:FA\_ME\_SP2560\_EI\_V3.lib

SI:51 Formula:C16H30O2 CAS:84743-29-3 MolWeight:254 RetIndex:2388

CompName:Methyl cis-10-pentadecenoate ; (Z)-pentadec-10-enoic acid

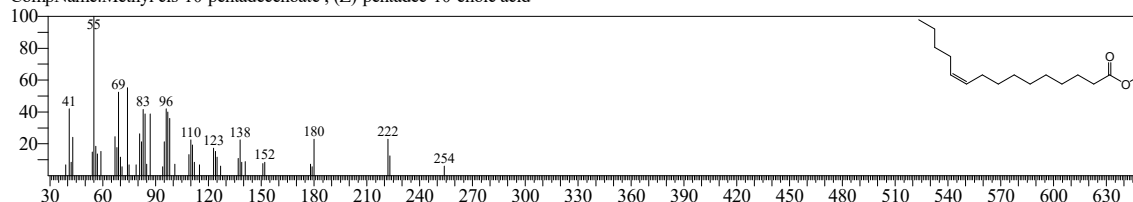

Hit#:5 Entry:27 Library:FA\_ME\_SP2560\_EI\_V3.lib

SI:51 Formula:C21H38O2 CAS:2091-39-6 MolWeight:322 RetIndex:2973

CompName:Methyl cis-11,14-Icosadienoate ; ; Icosa-11,14-dienoic acid

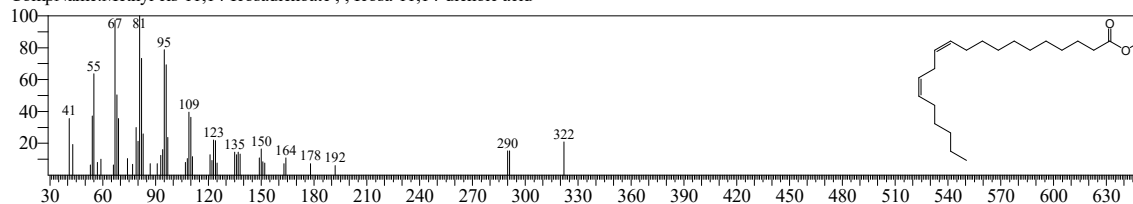



# TNAU

<< Target >>

Line#:8 R.Time:13.545(Scan#:1710) MassPeaks:434

RawMode:Averaged 13.540-13.550(1709-1711) BasePeak:155.05(50959)

BG Mode:Calc. from Peak Group 1 - Event 1 Q3 Scan

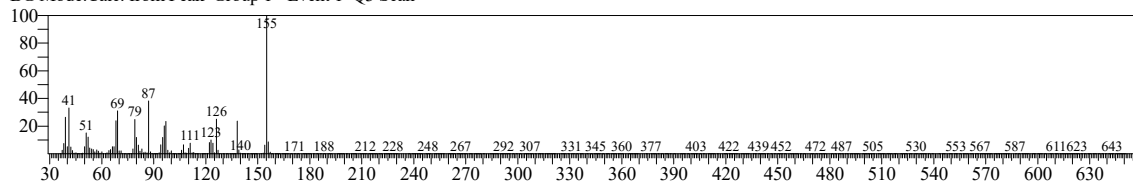

Hit#:1 Entry:34 Library:FA\_ME\_SP2560\_EI\_V3.lib

SI:53 Formula:C23H42O2 CAS:7370-49-2 MolWeight:350 RetIndex:3169

CompName:Methyl cis-13,16-Docosadienate ; (13Z,16E)-docosa-13,16-dienoic acid

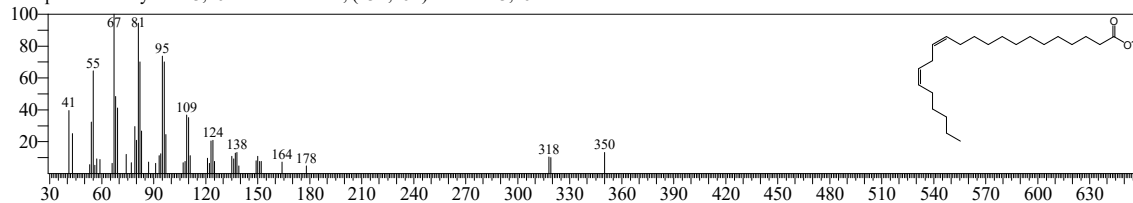

Hit#:2 Entry:21 Library:FA\_ME\_SP2560\_EI\_V3.lib

SI:52 Formula:C19H34O2 CAS:60-33-3 MolWeight:294 RetIndex:2775

CompName:Methyl linoleate ; Octadeca-9,12-dienoic acid

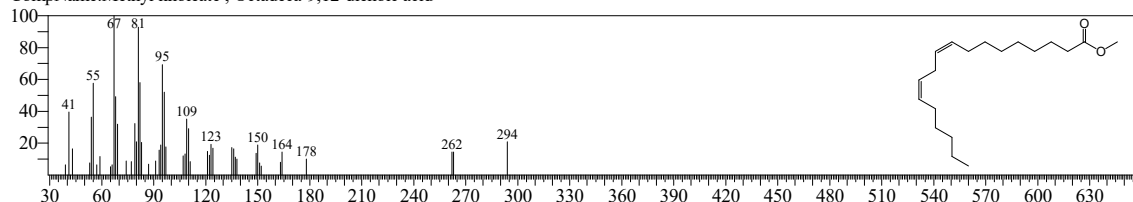

Hit#:3 Entry:20 Library:FA\_ME\_SP2560\_EI\_V3.lib

SI:52 Formula:C19H34O2 CAS:506-21-8 MolWeight:294 RetIndex:2727

CompName:Methyl linolelaidate ; (9E,12E)-octadeca-9,12-dienoic acid

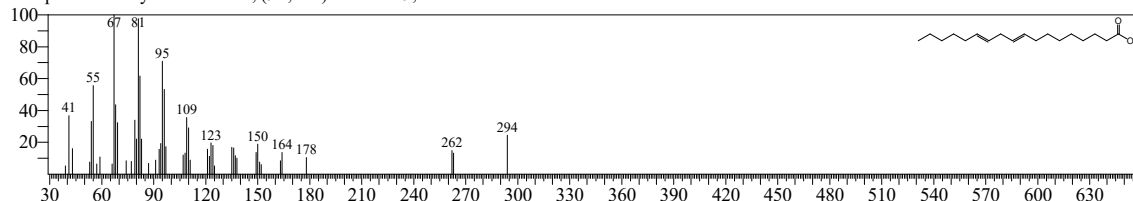

Hit#:4 Entry:11 Library:FA\_ME\_SP2560\_EI\_V3.lib

SI:51 Formula:C16H30O2 CAS:84743-29-3 MolWeight:254 RetIndex:2388

CompName:Methyl cis-10-pentadecenoate ; (Z)-pentadec-10-enoic acid

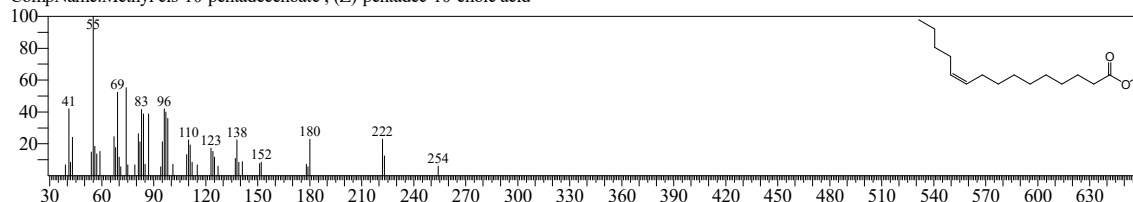

Hit#:5 Entry:27 Library:FA\_ME\_SP2560\_EI\_V3.lib

SI:51 Formula:C21H38O2 CAS:2091-39-6 MolWeight:322 RetIndex:2973

CompName:Methyl cis-11,14-Icosadienoate ; ; Icosa-11,14-dienoic acid

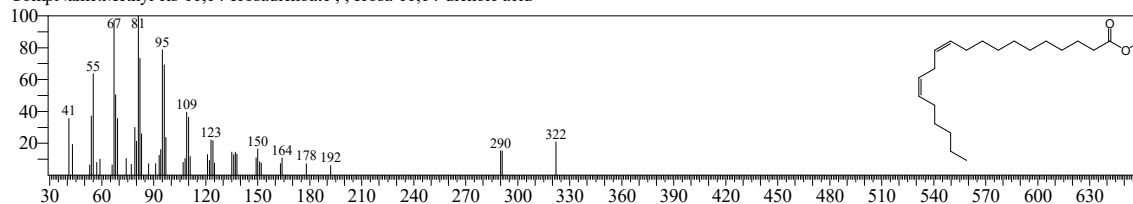

# TNAU

<< Target >>

Line#:9 R.Time:13.655(Scan#:1732) MassPeaks:329

RawMode:Averaged 13.650-13.660(1731-1733) BasePeak:36.00(88)

BG Mode:Calc. from Peak Group 1 - Event 1 Q3 Scan

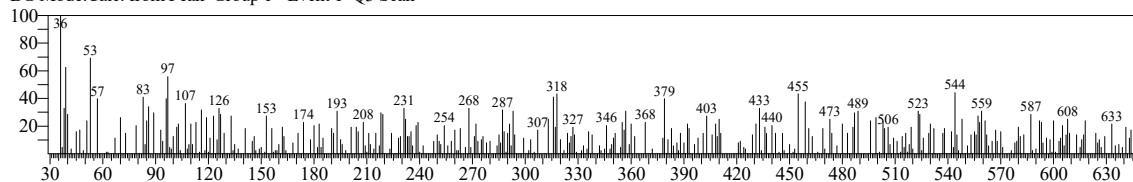

Hit#:1 Entry:454 Library:OA TMS DB5\_67min\_V3.lib

SI:12 Formula:C16H23NO3Si2 CAS:492-27-3 MolWeight:333 RetIndex:2089

CompName:Kynurenic acid-2TMS ; 4-oxo-1H-quinoline-2-carboxylic acid

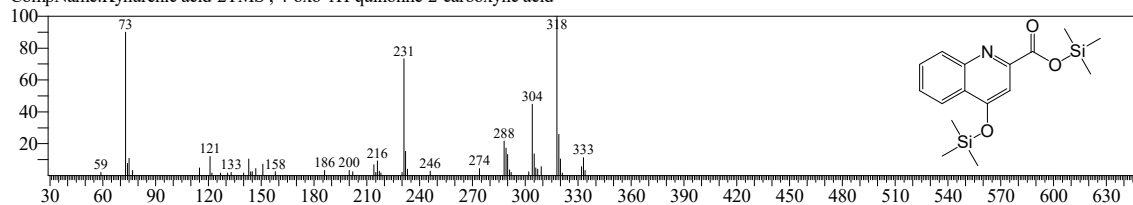

Hit#:2 Entry:130 Library:OA TMS DB5\_67min\_V3.lib

SI:12 Formula:C13H33NO3Si3 CAS:672-15-1 MolWeight:335 RetIndex:1458

CompName:Homoserine-3TMS ; (2S)-2-amino-4-hydroxybutanoic acid

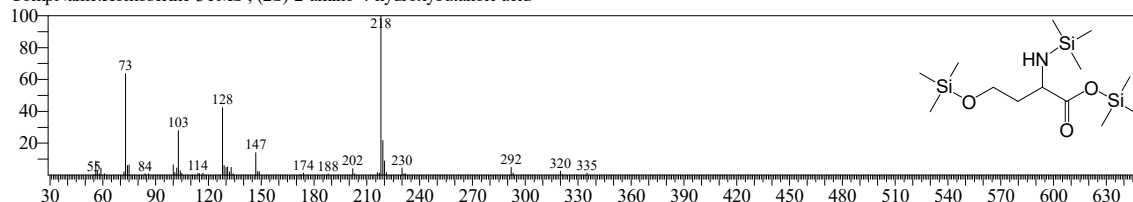

Hit#:3 Entry:183 Library:OA TMS DB5\_67min\_V3.lib

SI:12 Formula:C13H27NO3Si2 CAS:33008-07-0 MolWeight:301 RetIndex:1578

CompName:3-Methylcrotonylglycine-2TMS ; 2-(3-methylbut-2-enoylamino)acetic acid

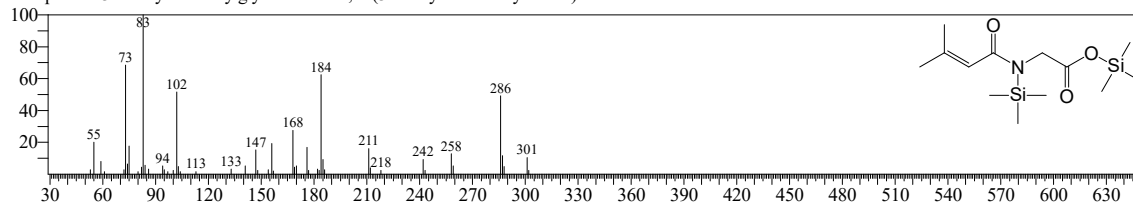

Hit#:4 Entry:409 Library:OA TMS DB5\_67min\_V3.lib

SI:11 Formula:C14H32N2O3Si2 CAS:692-04-6 MolWeight:332 RetIndex:1951

CompName:N6-Acetyllysine-2TMS ; (2S)-6-acetamido-2-aminohexanoic acid

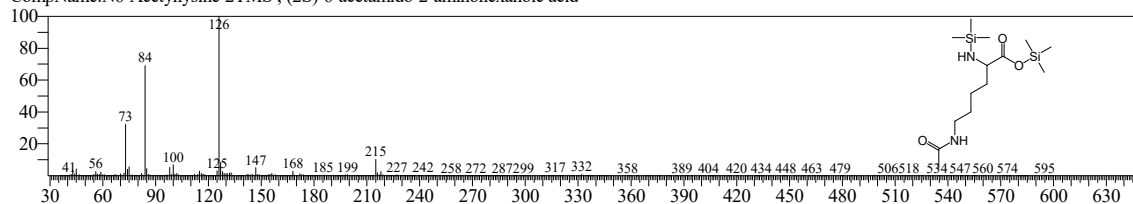

Hit#:5 Entry:500 Library:OA TMS DB5\_67min\_V3.lib

SI:11 Formula:C18H44N2O4S2Si4 CAS:56-89-3 MolWeight:528 RetIndex:2322

CompName:Cystine-4TMS ; (2R)-2-amino-3-[[[(2R)-2-amino-2-carboxyethyl]disulfanyl]propanoic acid

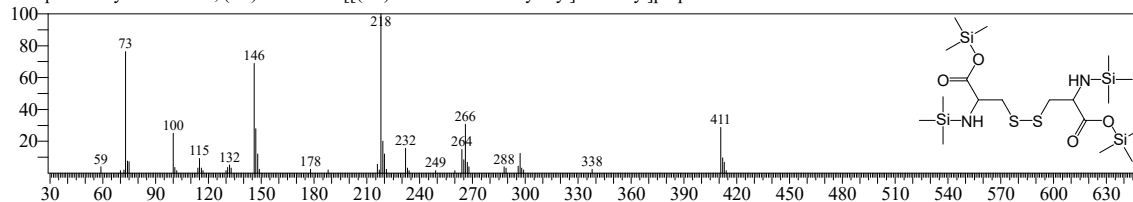

<< Target >>

Line#:10 R.Time:14.310(Scan#:1863) MassPeaks:352

RawMode:Averaged 14.305-14.315(1862-1864) BasePeak:71.00(89)

BG Mode:Calc. from Peak Group 1 - Event 1 Q3 Scan

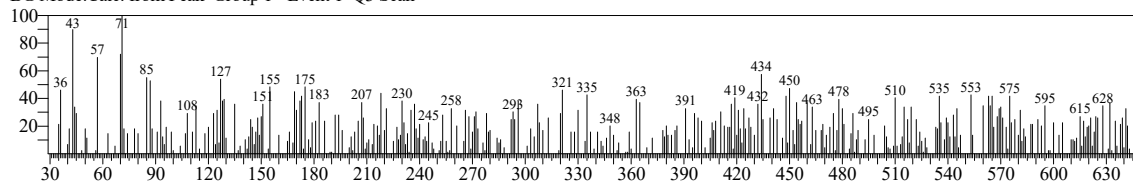

Hit#:1 Entry:1 Library:FA\_ME\_SP2560\_EI\_V3.lib

SI:20 Formula:C5H10O2 CAS:107-92-6 MolWeight:102 RetIndex:1113

CompName:Methyl butanoate ; Butanoic acid

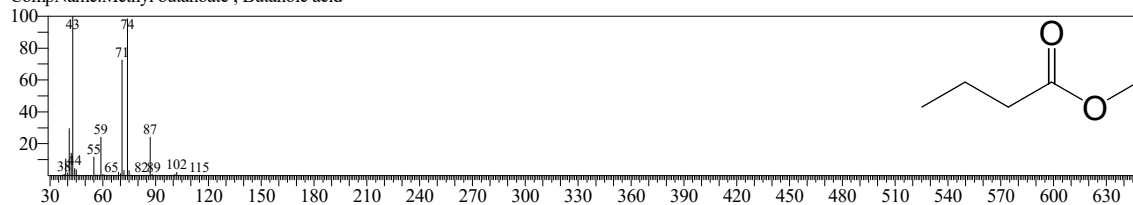

Hit#:2 Entry:567 Library:OA\_TMS\_DB5\_67min\_V3.lib

SI:16 Formula:C30H54OSi CAS:57-88-5 MolWeight:458 RetIndex:3221

CompName:Cholesterol-TMS ; (3S,8S,9S,10R,13R,14S,17R)-10,13-dimethyl-17-[(2R)-6-methylheptan-2-yl]-2,3,4,7,8,9,11,12,14,15,16,17-dodec

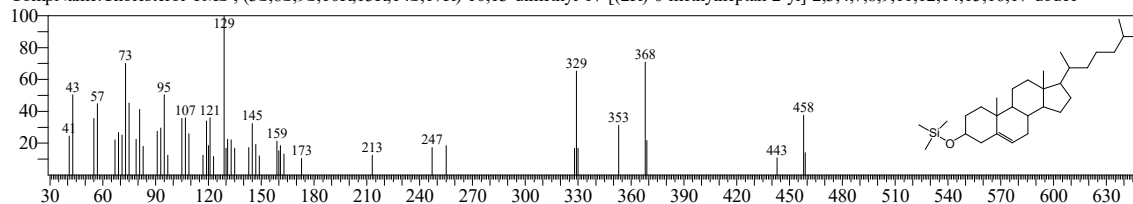

Hit#:3 Entry:130 Library:OA\_TMS\_DB5\_67min\_V3.lib

SI:14 Formula:C13H33NO3Si3 CAS:672-15-1 MolWeight:335 RetIndex:1458

CompName:Homoserine-3TMS ; (2S)-2-amino-4-hydroxybutanoic acid

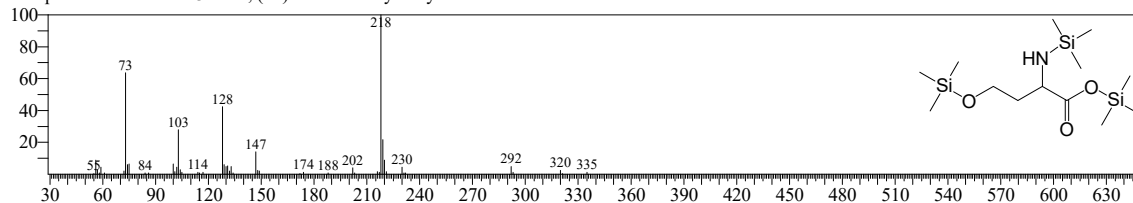

Hit#:4 Entry:459 Library:OA\_TMS\_DB5\_67min\_V3.lib

SI:13 Formula:C15H37N3O3Si3 CAS:372-75-8 MolWeight:391 RetIndex:2112

CompName:Citrulline-3TMS ; (2S)-2-amino-5-(carbamoylamino)pentanoic acid

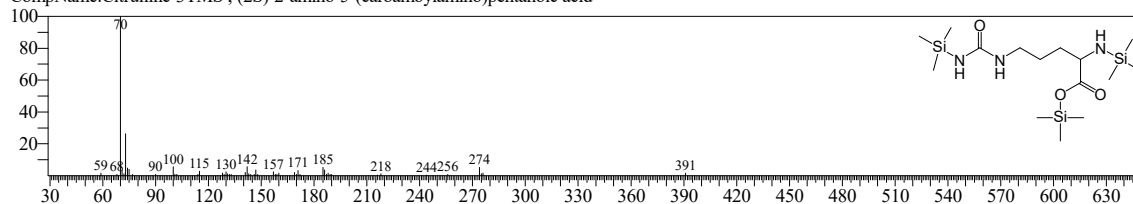

Hit#:5 Entry:489 Library:OA\_TMS\_DB5\_67min\_V3.lib

SI:13 Formula:C19H46N2O4SSi4 CAS:56-88-2 MolWeight:510 RetIndex:2233

CompName:Cystathionine-4TMS ; (2S)-2-amino-4-[(2R)-2-amino-2-carboxyethyl]sulfanylbutanoic acid

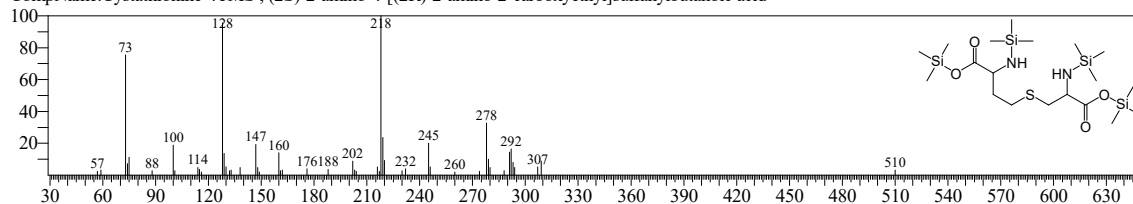

# TNAU

<< Target >>

Line#:11 R.Time:14.470(Scan#:1895) MassPeaks:354

RawMode:Averaged 14.465-14.475(1894-1896) BasePeak:163.05(1213)

BG Mode:Calc. from Peak Group 1 - Event 1 Q3 Scan

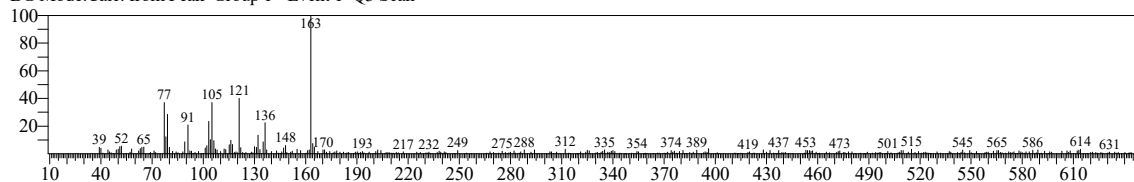

Hit#:1 Entry:57597 Library:NIST20M1.lib

SI:74 Formula:C10H11N3S CAS:39181-45-8 MolWeight:205 RetIndex:1890

CompName:5-(4-Methylbenzyl)-1,3,4-thiadiazol-2-amine \$ 1,3,4-Thiadiazol-2-amine, 5-[(4-methylphenyl)methyl]- \$ 5-[(4-Methylphenyl)methyl]-1,3,4-th

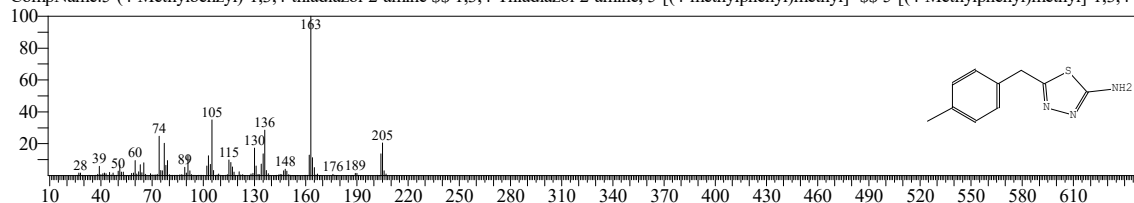

Hit#:2 Entry:24672 Library:NIST20M1.lib

SI:74 Formula:C9H9NS CAS:40046-30-8 MolWeight:163 RetIndex:0

CompName:3,5-Dimethylphenyl isothiocyanate \$ 1-Isothiocyanato-3,5-dimethylbenzene #

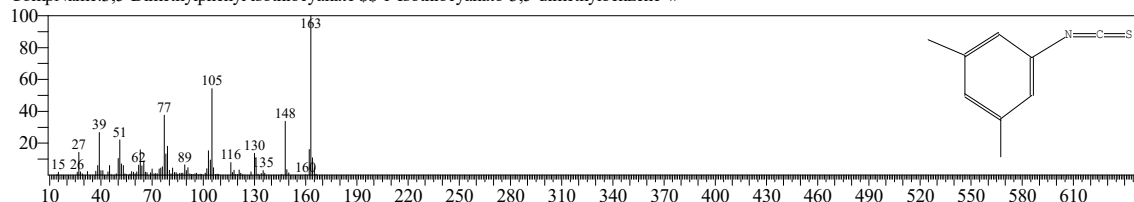

Hit#:3 Entry:14264 Library:NIST20R.lib

SI:73 Formula:C9H9NS CAS:1539-20-4 MolWeight:163 RetIndex:0

CompName:2,3-Dimethylphenylisothiocyanate \$ 1-Isothiocyanato-2,3-dimethylbenzene #

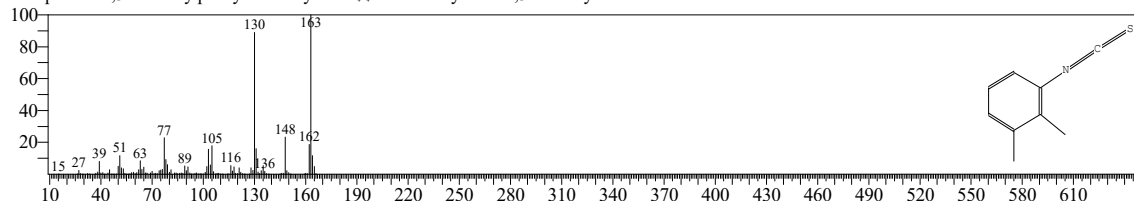

Hit#:4 Entry:176186 Library:NIST20M1.lib

SI:72 Formula:C17H17N3O3 CAS:0-00-0 MolWeight:311 RetIndex:3129

CompName:Oxalic acid, monoamide monohydrazide, N-(2,4-dimethylphenyl)-N"-salicylideno- \$ N-(2,4-Dimethylphenyl)-2-[(2E)-2-(2-hydroxybenzylidene

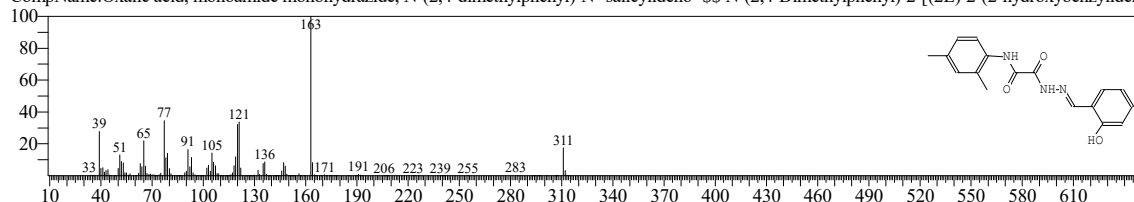

Hit#:5 Entry:24676 Library:NIST20M1.lib

SI:72 Formula:C9H9NS CAS:39842-01-8 MolWeight:163 RetIndex:0

CompName:2,4-Dimethylphenyl isothiocyanate \$ 1-Isothiocyanato-2,4-dimethylbenzene #

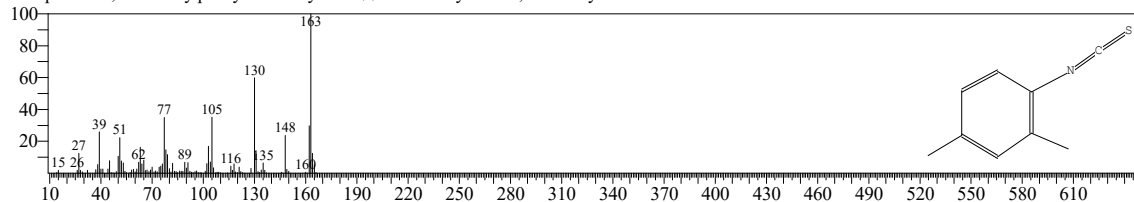

# TNAU

<< Target >>

Line#:12 R.Time:18.065(Scan#:2614) MassPeaks:352

RawMode:Averaged 18.060-18.070(2613-2615) BasePeak:60.00(4801)

BG Mode:Calc. from Peak Group 1 - Event 1 Q3 Scan

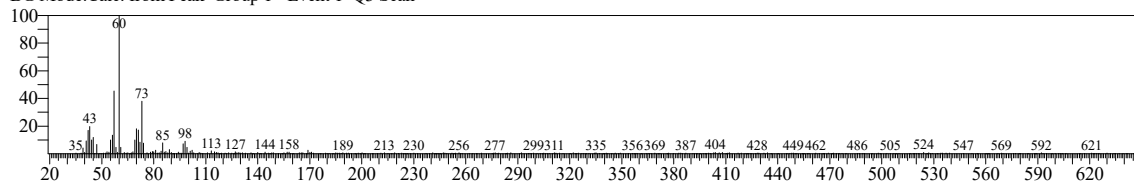

Hit#:1 Entry:13905 Library:NIST20R.lib

SI:93 Formula:C6H10O5 CAS:498-07-7 MolWeight:162 RetIndex:1404

CompName:.beta.-D-Glucopyranose, 1,6-anhydro- \$\$ Anhydro-d-mannosan \$\$ Levoglucosan \$\$ 1,6-Anhydro-.beta.-D-glucopyranose \$\$ 1,6-Anhydro-beta-

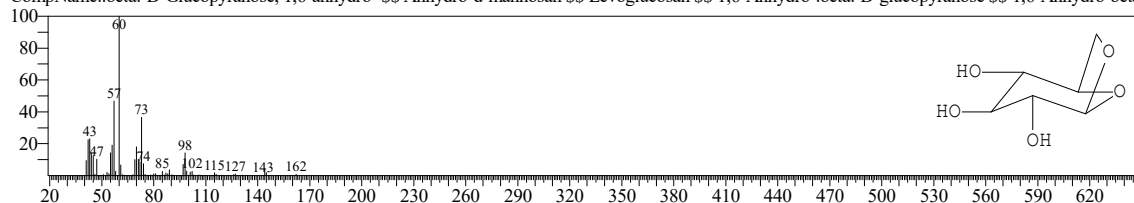

Hit#:2 Entry:36240 Library:NIST20M1.lib

SI:93 Formula:C6H12O6 CAS:2595-97-3 MolWeight:180 RetIndex:1698

CompName:D-Allose \$\$ .beta.-D-Allose \$\$ Hexose #

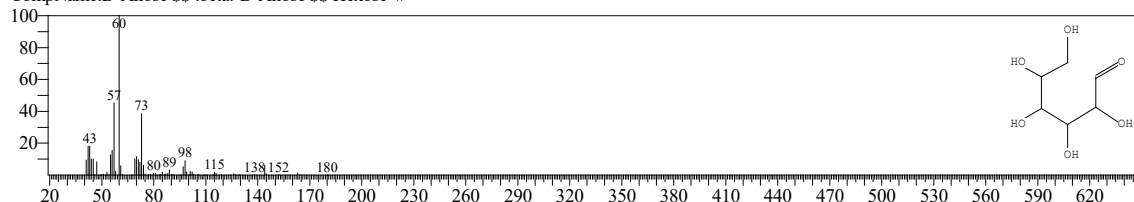

Hit#:3 Entry:23812 Library:NIST20M1.lib

SI:90 Formula:C6H10O5 CAS:0-00-0 MolWeight:162 RetIndex:1404

CompName:1,6-Anhydro-.beta.-d-talopyranose

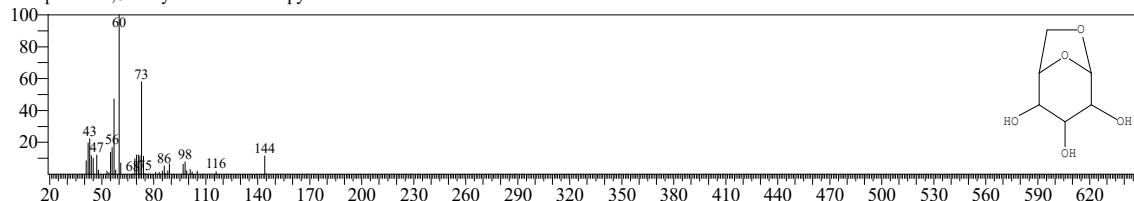

Hit#:4 Entry:23808 Library:NIST20M1.lib

SI:88 Formula:C6H10O5 CAS:0-00-0 MolWeight:162 RetIndex:1400

CompName:3,4-Altrosan \$\$ 3,4-Anhydrohexopyranose #

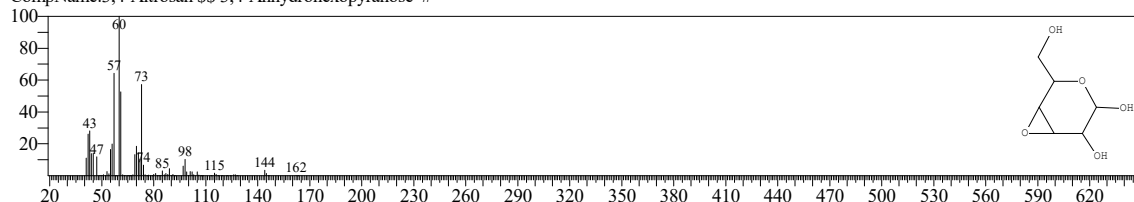

Hit#:5 Entry:21209 Library:NIST20R.lib

SI:84 Formula:C7H14O6 CAS:97-30-3 MolWeight:194 RetIndex:1714

CompName:.alpha.-D-Glucopyranoside, methyl \$\$ Glucopyranoside, methyl, .alpha.-D- \$\$ .alpha.-Methylglucoside \$\$ Methyl .alpha.-D-glucopyranoside \$\$

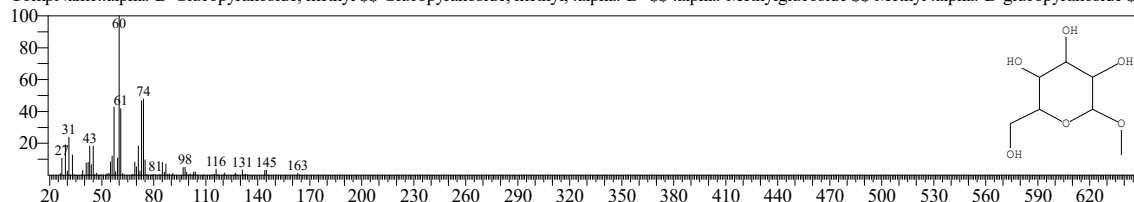

# TNAU

<< Target >>

Line#:13 R.Time:18.505(Scan#:2702) MassPeaks:330

RawMode:Averaged 18.500-18.510(2701-2703) BasePeak:191.10(2311)

BG Mode:Calc. from Peak Group 1 - Event 1 Q3 Scan

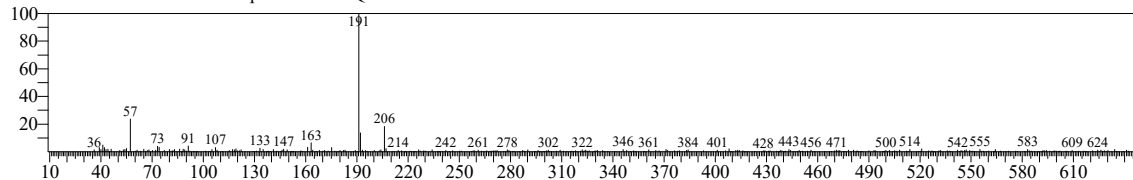

Hit#:1 Entry:170993 Library:NIST20M1.lib

SI:84 Formula:C19H30O3 CAS:166273-38-7 MolWeight:306 RetIndex:2255

CompName:Pentanoic acid, 5-hydroxy-, 2,4-di-t-butylphenyl esters \$\$ 2,4-Ditert-butylphenyl 5-hydroxypentanoate #

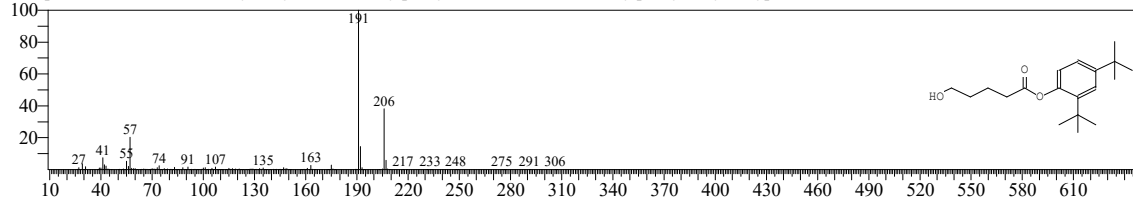

Hit#:2 Entry:24088 Library:NIST20R.lib

SI:83 Formula:C14H22O CAS:96-76-4 MolWeight:206 RetIndex:1555

CompName:2,4-Di-tert-butylphenol \$\$ Phenol, 2,4-bis(1,1-dimethylethyl)- \$\$ Phenol, 2,4-di-tert-butyl- \$\$ 2,4-di-Butylphenol \$\$ 1-Hydroxy-2,4-di-tert-bu

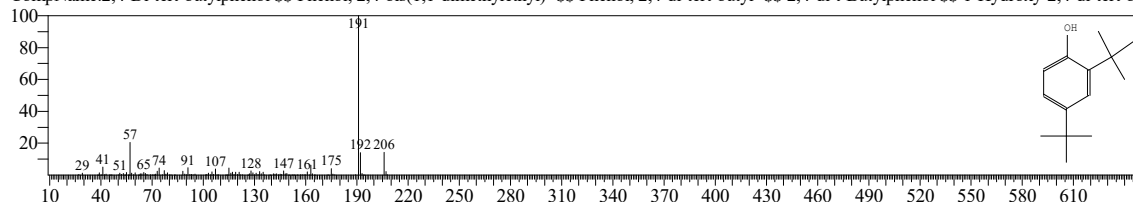

Hit#:3 Entry:24110 Library:NIST20R.lib

SI:82 Formula:C14H22O CAS:1138-52-9 MolWeight:206 RetIndex:1555

CompName:Phenol, 3,5-bis(1,1-dimethylethyl)- \$\$ Phenol, 3,5-di-tert-butyl- \$\$ 3,5-Di-tert-butylphenol \$\$ Phenol, 3,5-bis(t-butyl) \$\$ 3,5-Di-t-butylphenol S

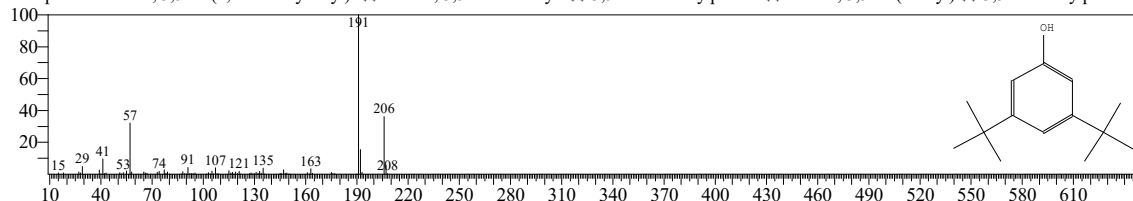

Hit#:4 Entry:59059 Library:NIST20M1.lib

SI:82 Formula:C14H22O CAS:5875-45-6 MolWeight:206 RetIndex:1555

CompName:Phenol, 2,5-bis(1,1-dimethylethyl)- \$\$ Phenol, 2,5-di-tert-butyl- \$\$ 2,5-Di-tert-butylphenol \$\$ 2,5-bis(1,1-Dimethylethyl)phenol

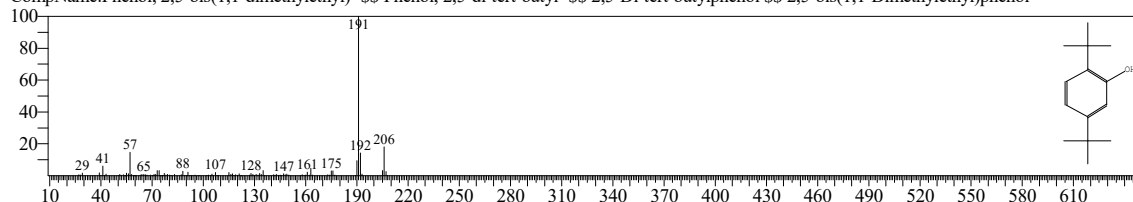

Hit#:5 Entry:103047 Library:NIST20M1.lib

SI:80 Formula:C16H24O2 CAS:104316-22-5 MolWeight:248 RetIndex:1714

CompName:2,4-Di-tert-butylphenol, acetate

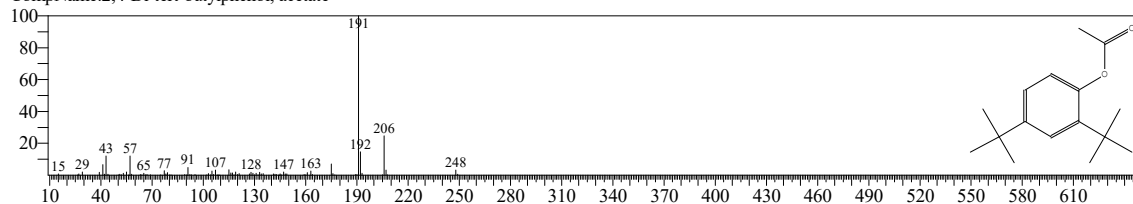

# TNAU

<< Target >>

Line#:14 R.Time:19.195(Scan#:2840) MassPeaks:409

RawMode:Averaged 19.190-19.200(2839-2841) BasePeak:263.15(7670)

BG Mode:Calc. from Peak Group 1 - Event 1 Q3 Scan

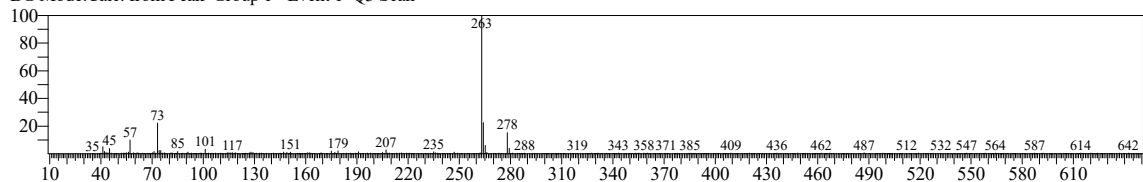

Hit#:1 Entry:33874 Library:NIST20R.lib

SI:91 Formula:C17H30OSi CAS:53925-65-8 MolWeight:278 RetIndex:1632

CompName:2,4-Di-tert-butylphenoxytrimethylsilane \$\$ Benzene, 2,4-bis(1,1-dimethylethyl)-1-[(trimethylsilyl)oxy]- \$\$ Silane, [2,4-bis(1,1-dimethylethyl)ph

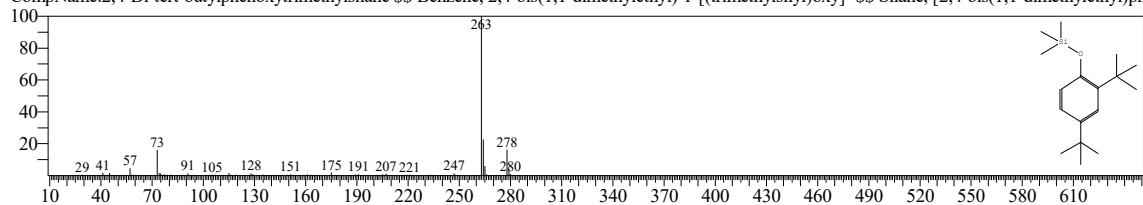

Hit#:2 Entry:33871 Library:NIST20R.lib

SI:82 Formula:C17H30OSi CAS:10416-73-6 MolWeight:278 RetIndex:1632

CompName:2,6-Bis(tert-butyl)phenol, TMS derivative \$\$ Trimethyl(2,6 ditert.-butylphenoxy)silane \$\$ (2,6-Ditert-butylphenoxy)(trimethyl)silane #

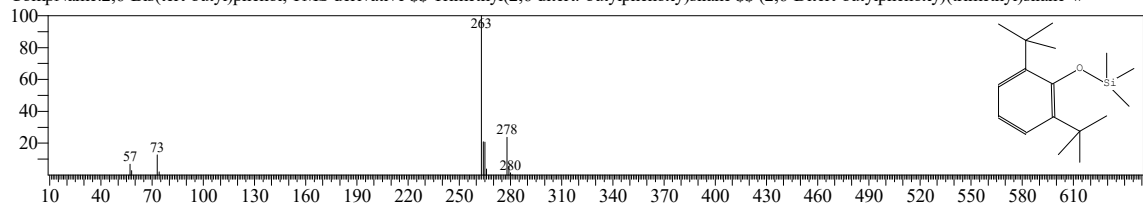

Hit#:3 Entry:136557 Library:NIST20M1.lib

SI:82 Formula:C12H22N4Si2 CAS:0-00-0 MolWeight:278 RetIndex:1703

CompName:3-Deazaadenine, 2TMS \$\$ 3-Deazaadenine, N,N'-bis-TMS \$\$ 1H-Imidazo[4,5-c]pyridin-4-amine, N,N'-bis-TMS

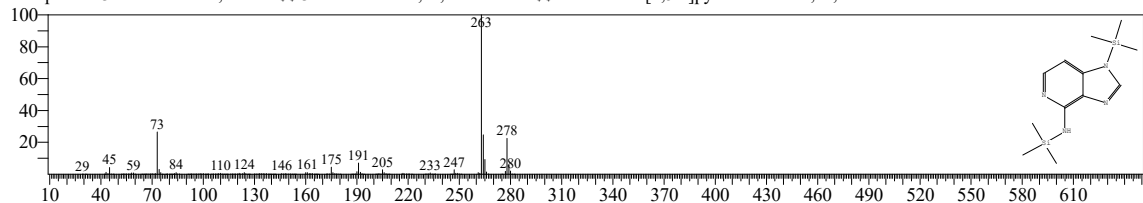

Hit#:4 Entry:137020 Library:NIST20M1.lib

SI:79 Formula:C15H22O3Si CAS:0-00-0 MolWeight:278 RetIndex:1736

CompName:6-Methoxy-2,2-dimethyl-2,3-dihydro-4H-chromen-4-one, TMS \$\$ 6-Methoxy-2,2-dimethyl-chroman-4-one, O-trimethylsilyl- \$\$ 4H-1-Benzopy

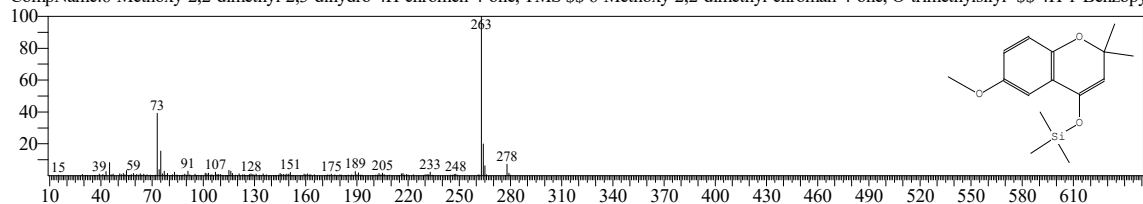

Hit#:5 Entry:136556 Library:NIST20M1.lib

SI:78 Formula:C12H22N4Si2 CAS:0-00-0 MolWeight:278 RetIndex:1606

CompName:1H,1'H-2,2'-Biimidazole, 2TMS \$\$ 1H,1'H-2,2'-Biimidazole, N,N'-bis-TMS \$\$ 1H,1'H-[2,2']Biimidazolyl, 2TMS \$\$ 2,2'-Bi-1H-imidazole, 2TMS

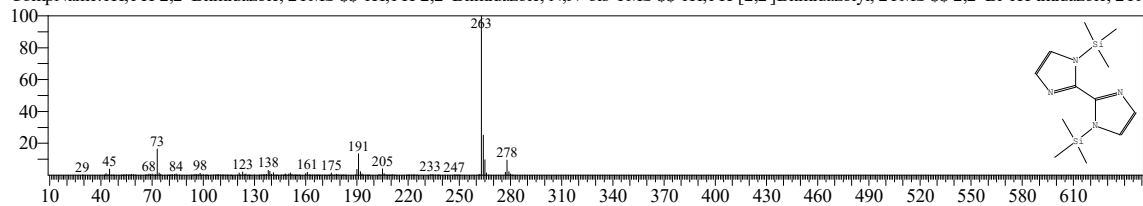

# TNAU

<< Target >>

Line#:15 R.Time:20.305(Scan#:3062) MassPeaks:333

RawMode:Averaged 20.300-20.310(3061-3063) BasePeak:73.00(253)

BG Mode:Calc. from Peak Group 1 - Event 1 Q3 Scan

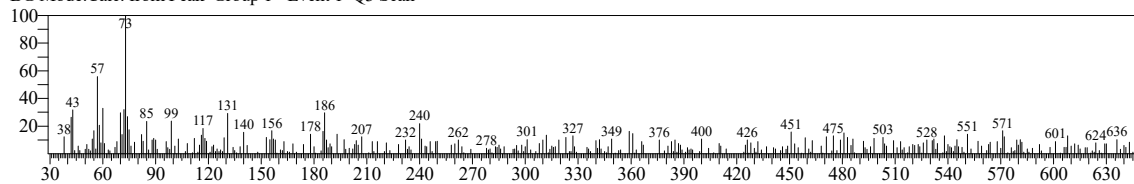

Hit#:1 Entry:139 Library:OA\_TMS\_DB5\_67min\_V3.lib

SI:44 Formula:C10H21NO3Si CAS:16284-60-9 MolWeight:231 RetIndex:1487

CompName:Isovalerylglycine-TMS ; 2-(3-methylbutanoylamino)acetic acid

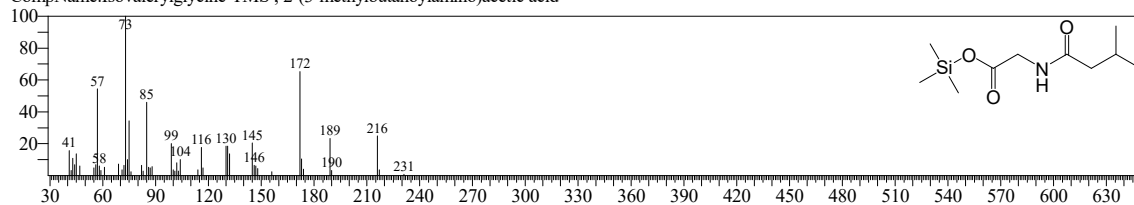

Hit#:2 Entry:129 Library:OA\_TMS\_DB5\_67min\_V3.lib

SI:44 Formula:C13H28O2Si CAS:334-48-5 MolWeight:244 RetIndex:1457

CompName:Decanoic acid-TMS ; decanoic acid

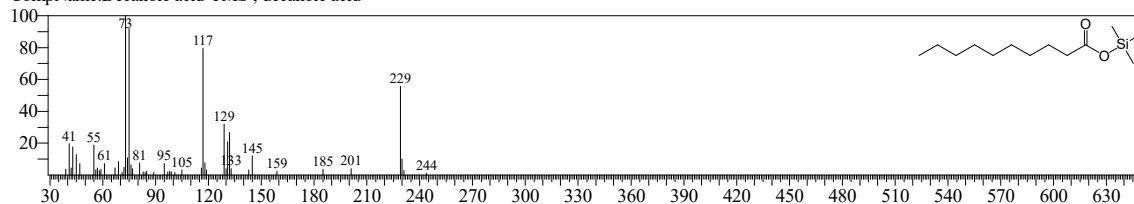

Hit#:3 Entry:39 Library:OA\_TMS\_DB5\_67min\_V3.lib

SI:43 Formula:C10H21NO3Si CAS:816-66-0 MolWeight:231 RetIndex:1181

CompName:2-Ketoisocaproic acid-meto-TMS(1) ; 4-methyl-2-oxopentanoic acid

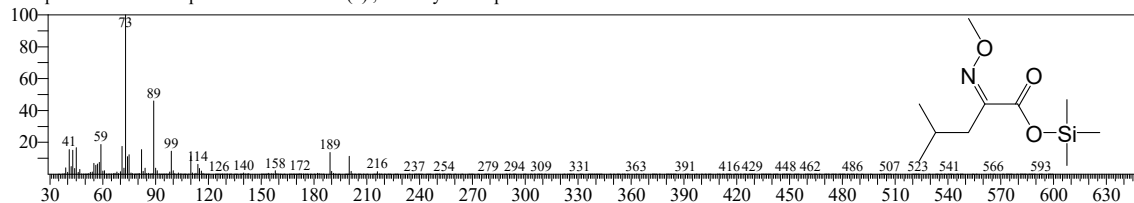

Hit#:4 Entry:40 Library:OA\_TMS\_DB5\_67min\_V3.lib

SI:43 Formula:C10H21NO3Si CAS:1460-34-0 MolWeight:231 RetIndex:1184

CompName:3-Methyl-2-oxovaleric acid-meto-TMS(1) ; 3-methyl-2-oxopentanoic acid

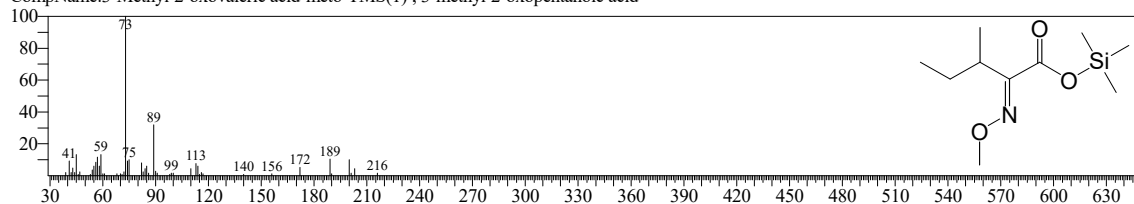

Hit#:5 Entry:70 Library:OA\_TMS\_DB5\_67min\_V3.lib

SI:43 Formula:C11H24O2Si CAS:124-07-2 MolWeight:216 RetIndex:1263

CompName:Octanoic acid-TMS ; octanoic acid

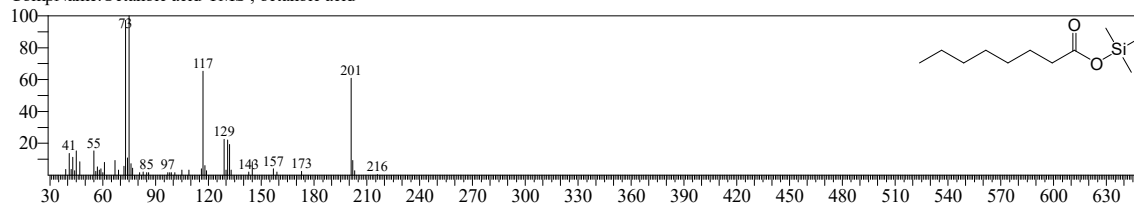



# TNAU

<< Target >>

Line#:16 R.Time:20.365(Scan#:3074) MassPeaks:333

RawMode:Averaged 20.360-20.370(3073-3075) BasePeak:73.05(521)

BG Mode:Calc. from Peak Group 1 - Event 1 Q3 Scan

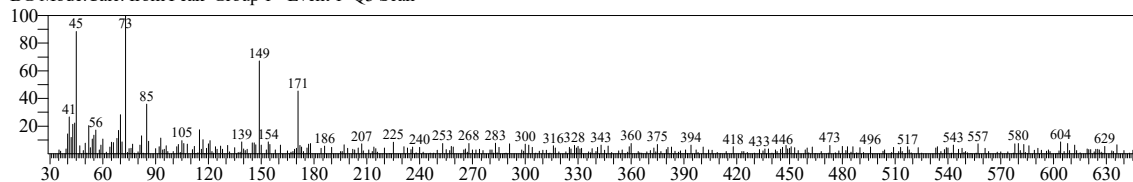

Hit#:1 Entry:39 Library:OA\_TMS\_DB5\_67min\_V3.lib

SI:42 Formula:C10H21NO3Si CAS:816-66-0 MolWeight:231 RetIndex:1181

CompName:2-Ketoisocaproic acid-meto-TMS(1) ; 4-methyl-2-oxopentanoic acid

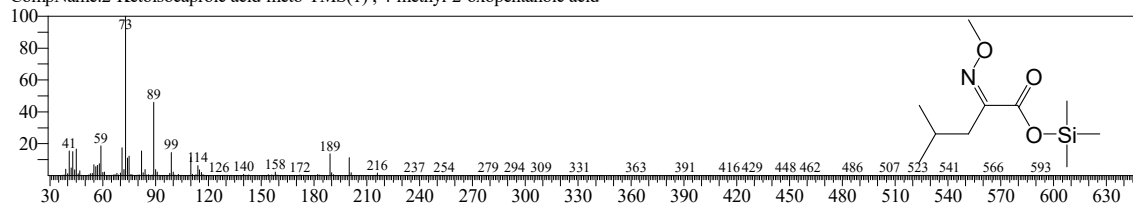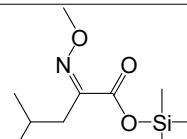

Hit#:2 Entry:40 Library:OA\_TMS\_DB5\_67min\_V3.lib

SI:42 Formula:C10H21NO3Si CAS:1460-34-0 MolWeight:231 RetIndex:1184

CompName:3-Methyl-2-oxovaleric acid-meto-TMS(1) ; 3-methyl-2-oxopentanoic acid

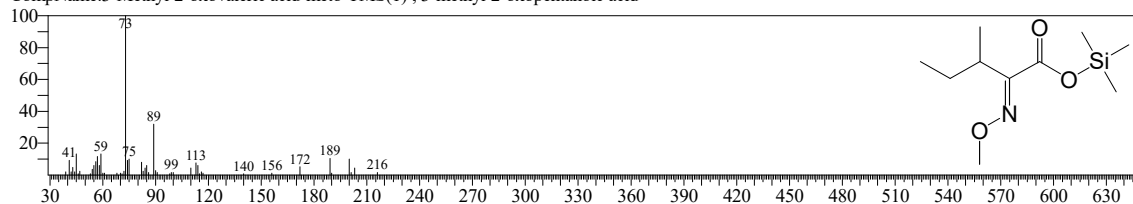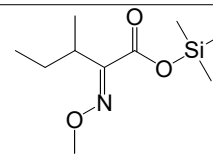

Hit#:3 Entry:37 Library:OA\_TMS\_DB5\_67min\_V3.lib

SI:40 Formula:C11H26O3Si2 CAS:4026-18-0 MolWeight:262 RetIndex:1169

CompName:2-Hydroxyisovaleric acid-2TMS ; 2-hydroxy-3-methylbutanoic acid

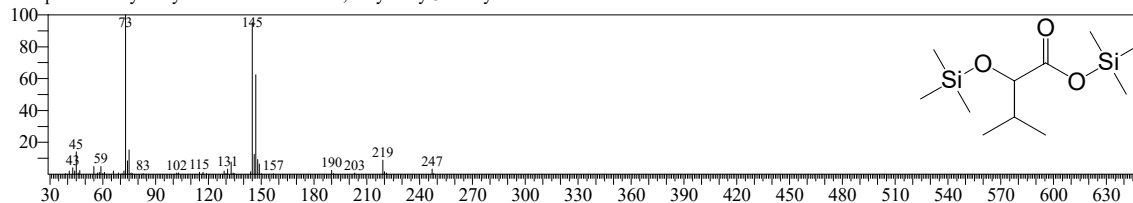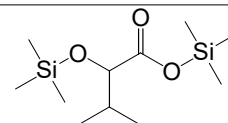

Hit#:4 Entry:6 Library:OA\_TMS\_DB5\_67min\_V3.lib

SI:39 Formula:C5H9Cl3O2Si CAS:76-03-9 MolWeight:234 RetIndex:1059

CompName:Trichloroacetic acid-TMS ; 2,2,2-trichloroacetic acid

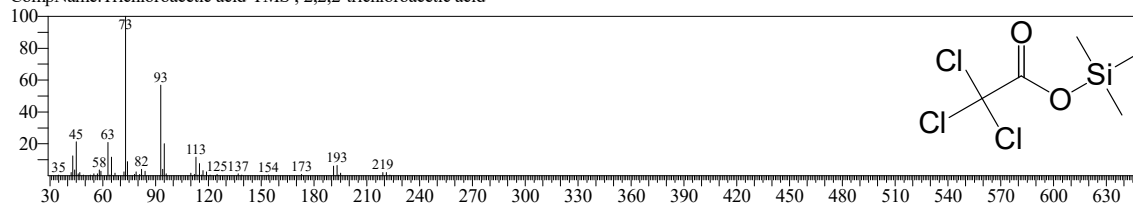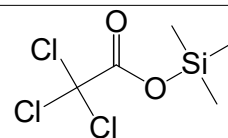

Hit#:5 Entry:258 Library:OA\_TMS\_DB5\_67min\_V3.lib

SI:39 Formula:C14H30O4Si2 CAS:505-48-6 MolWeight:318 RetIndex:1700

CompName:Suberic acid-2TMS ; octanedioic acid

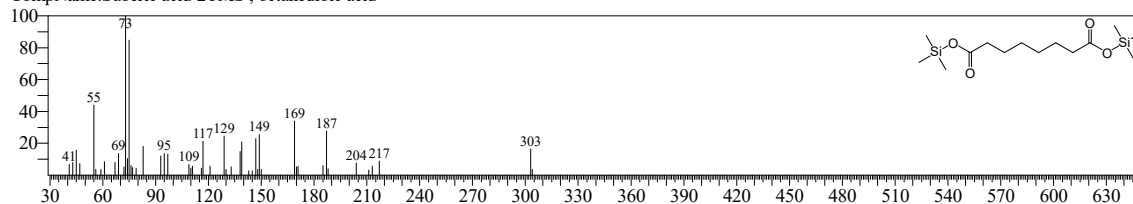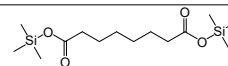

# TNAU

<< Target >>

Line#:17 R.Time:28.300(Scan#:4661) MassPeaks:406

RawMode:Averaged 28.295-28.305(4660-4662) BasePeak:73.05(6787)

BG Mode:Calc. from Peak Group 1 - Event 1 Q3 Scan

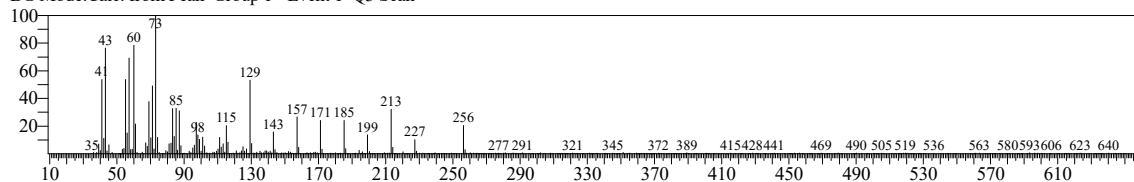

Hit#:1 Entry:31600 Library:NIST20R.lib

SI:95 Formula:C16H32O2 CAS:57-10-3 MolWeight:256 RetIndex:1968

CompName:n-Hexadecanoic acid \$ Hexadecanoic acid \$ n-Hexadecic acid \$ Palmitic acid \$ Pentadecanecarboxylic acid \$ 1-Pentadecanecarboxylic

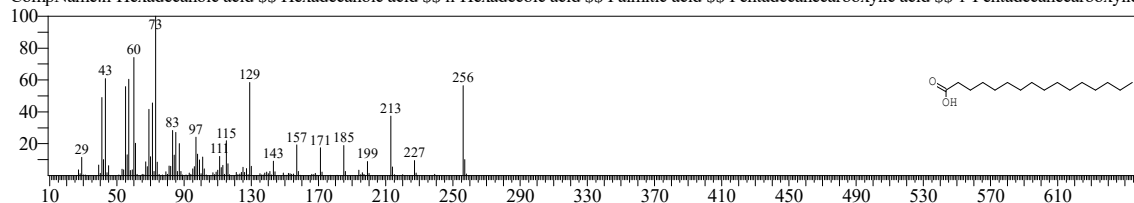

Hit#:2 Entry:29890 Library:NIST20R.lib

SI:92 Formula:C15H30O2 CAS:1002-84-2 MolWeight:242 RetIndex:1869

CompName:Pentadecanoic acid \$ Pentadecylic acid \$ n-Pentadecanoic acid \$ n-Pentadecylic acid

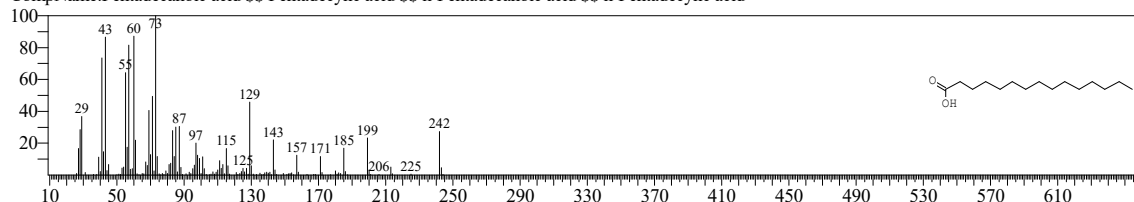

Hit#:3 Entry:44286 Library:NIST20M2.lib

SI:91 Formula:C38H68O8 CAS:28474-90-0 MolWeight:652 RetIndex:4765

CompName:l-(+)-Ascorbic acid 2,6-dihexadecanoate

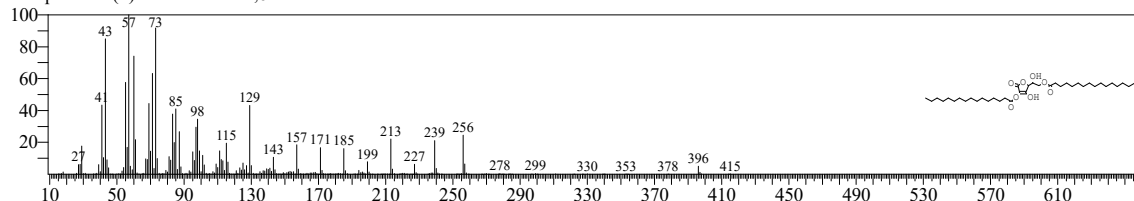

Hit#:4 Entry:25643 Library:NIST20R.lib

SI:90 Formula:C13H26O2 CAS:638-53-9 MolWeight:214 RetIndex:1670

CompName:Tridecanoic acid \$ n-Tridecanoic acid \$ n-Tridecoic acid \$ Tridecylic acid

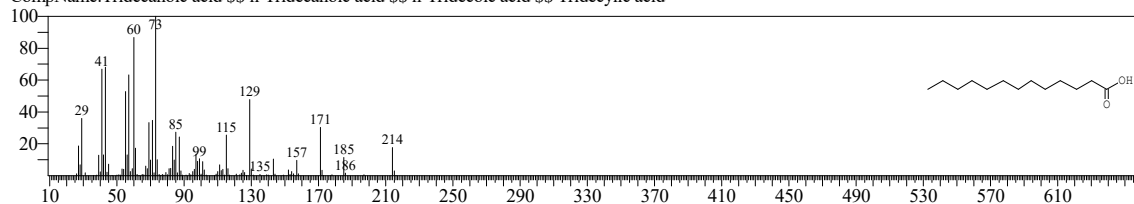

Hit#:5 Entry:144781 Library:NIST20M1.lib

SI:89 Formula:C18H36O2 CAS:57-11-4 MolWeight:284 RetIndex:2167

CompName:Octadecanoic acid \$ Stearic acid \$ n-Octadecanoic acid \$ Humko Industriene R \$ Hydrofol Acid 150 \$ Hystrene S-97 \$ Hystrene T-70 \$

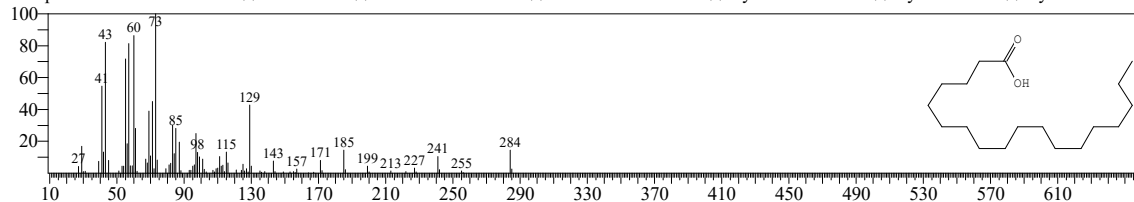

# TNAU

<< Target >>

Line#:18 R.Time:31.475(Scan#:5296) MassPeaks:351

RawMode:Averaged 31.470-31.480(5295-5297) BasePeak:67.05(3855)

BG Mode:Calc. from Peak Group 1 - Event 1 Q3 Scan

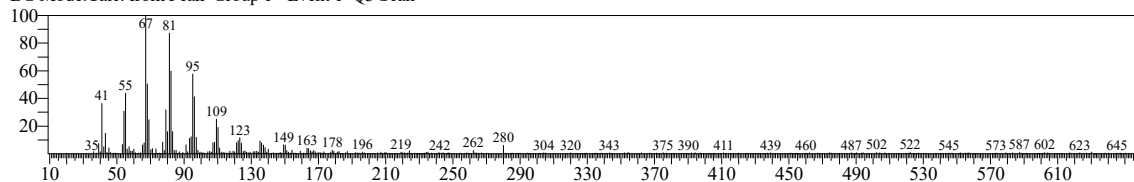

Hit#:1 Entry:139646 Library:NIST20M1.lib

SI:95 Formula:C18H32O2 CAS:2420-56-6 MolWeight:280 RetIndex:2183

CompName:10E,12Z-Octadecadienoic acid

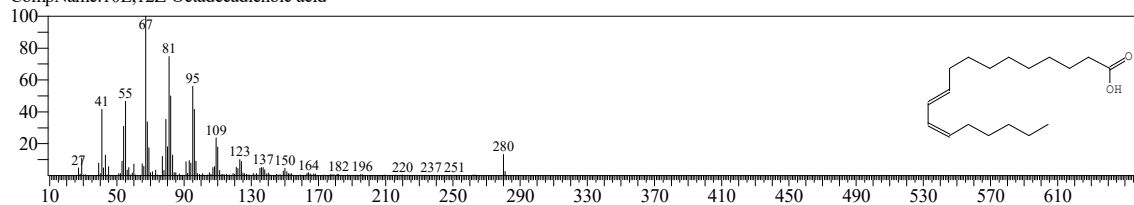

Hit#:2 Entry:34035 Library:NIST20R.lib

SI:95 Formula:C18H32O2 CAS:60-33-3 MolWeight:280 RetIndex:2183

CompName:9,12-Octadecadienoic acid (Z,Z)- \$\$ cis-9,cis-12-Octadecadienoic acid \$\$ cis,cis-Linoleic acid \$\$ Grape seed oil \$\$ Linoleic \$\$ Linoleic acid \$

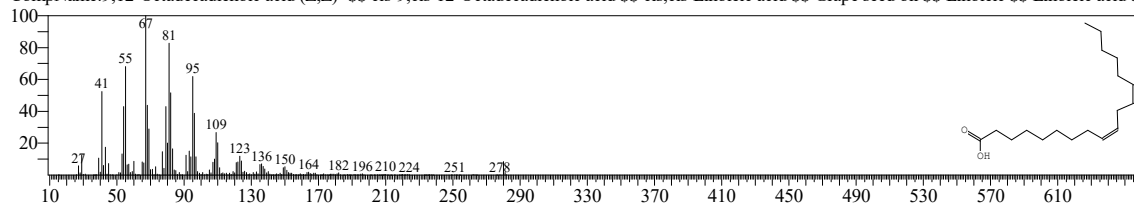

Hit#:3 Entry:139651 Library:NIST20M1.lib

SI:95 Formula:C18H32O2 CAS:544-71-8 MolWeight:280 RetIndex:2183

CompName:(9E,11E)-Octadecadienoic acid

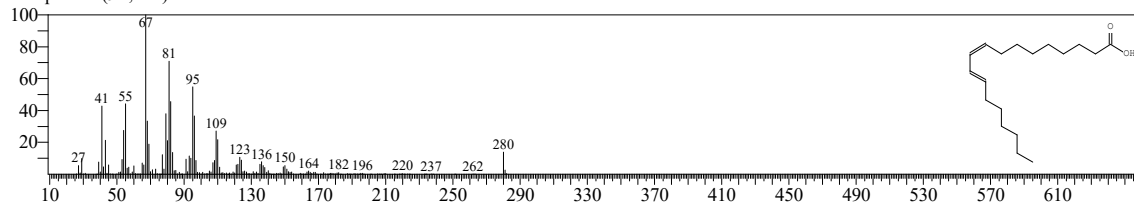

Hit#:4 Entry:139661 Library:NIST20M1.lib

SI:93 Formula:C18H32O2 CAS:506-21-8 MolWeight:280 RetIndex:2183

CompName:Linoelaidic acid

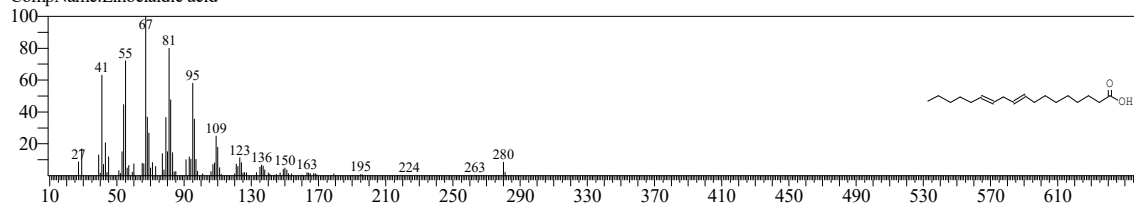

Hit#:5 Entry:173215 Library:NIST20M1.lib

SI:93 Formula:C20H36O2 CAS:2091-39-6 MolWeight:308 RetIndex:2382

CompName:11,14-Eicosadienoic acid

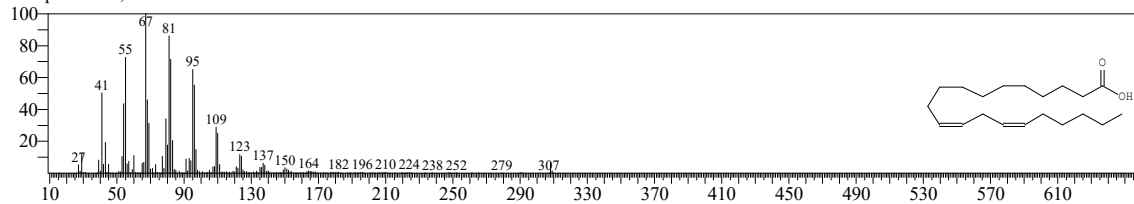

# TNAU

<< Target >>

Line#:19 R.Time:31.585(Scan#:5318) MassPeaks:383

RawMode:Averaged 31.580-31.590(5317-5319) BasePeak:55.10(1609)

BG Mode:Calc. from Peak Group 1 - Event 1 Q3 Scan

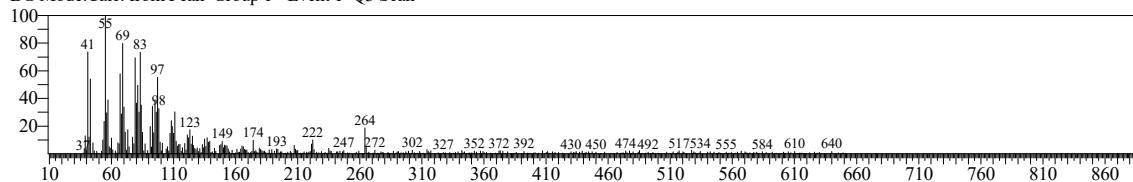

Hit#:1 Entry:92244 Library:NIST20M1.lib

SI:88 Formula:C16H30O CAS:56219-04-6 MolWeight:238 RetIndex:1808

CompName:cis-9-Hexadecenal \$ 9-Hexadecenal, (Z)- \$ (Z)-9-Hexadecenal \$ Z-9-Hexadecenal \$ (9Z)-9-Hexadecenal #

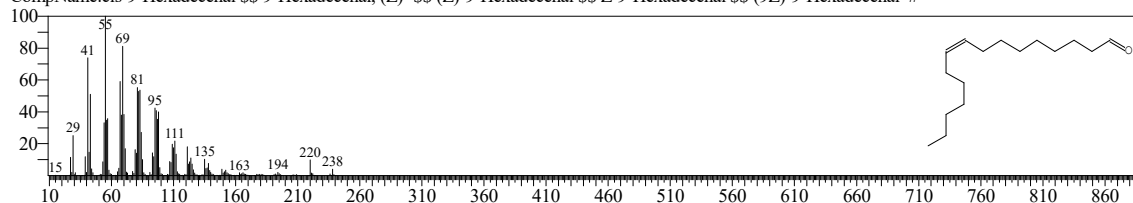

Hit#:2 Entry:46357 Library:NIST20M2.lib

SI:88 Formula:C57H104O6 CAS:537-39-3 MolWeight:884 RetIndex:6149

CompName:9-Octadecenoic acid, 1,2,3-propanetriyl ester, (E,E,E)- \$ 2,3-Bis[(9E)-9-octadecenoyloxy]propyl (9E)-9-octadecenoate #

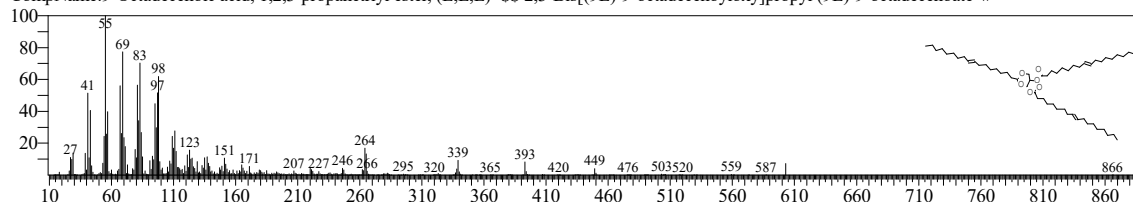

Hit#:3 Entry:123421 Library:NIST20M1.lib

SI:88 Formula:C18H34O CAS:2423-10-1 MolWeight:266 RetIndex:2007

CompName:9-Octadecenal, (Z)- \$ Olealdehyde \$ cis-9-Octadecenal \$ Oleylaldehyde \$ Z-9-Octadecenal \$ (9Z)-9-Octadecenal #

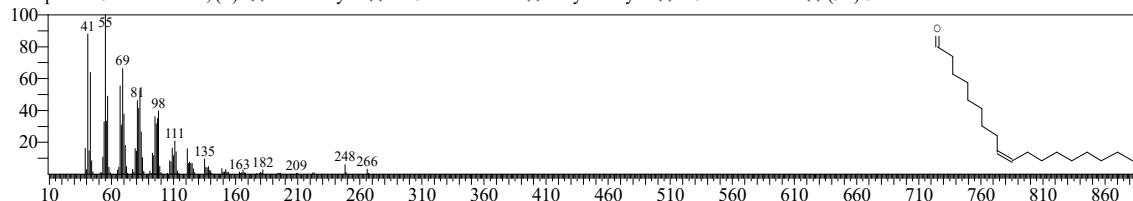

Hit#:4 Entry:63176 Library:NIST20M1.lib

SI:87 Formula:C14H26O CAS:65128-96-3 MolWeight:210 RetIndex:1609

CompName:7-Tetradecenal, (Z)- \$ Z-7-Tetradecenal \$ (7Z)-7-Tetradecenal #

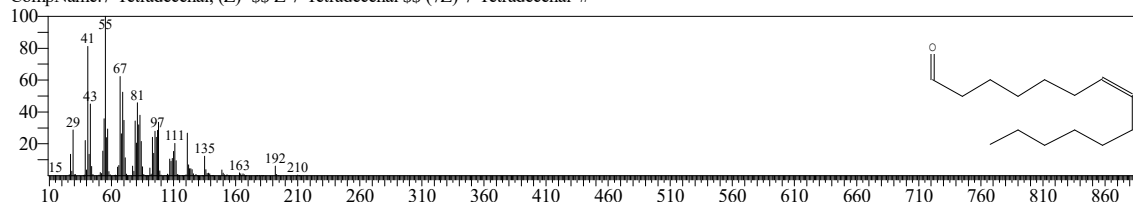

Hit#:5 Entry:92227 Library:NIST20M1.lib

SI:87 Formula:C16H30O CAS:56797-40-1 MolWeight:238 RetIndex:1808

CompName:7-Hexadecenal, (Z)- \$ (Z)-7-Hexadecenal \$ Z-7-Hexadecenal \$ (7Z)-7-Hexadecenal #

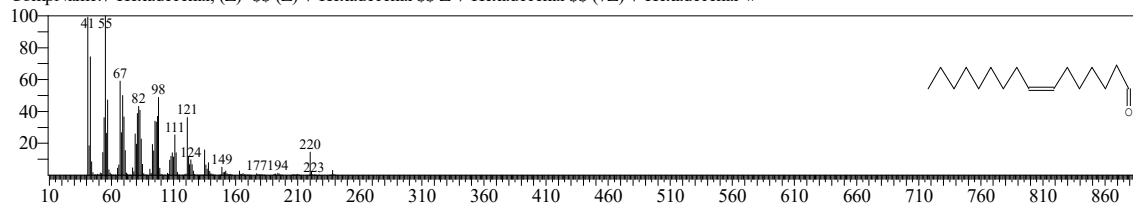

# TNAU

<< Target >>

Line#:20 R.Time:32.030(Scan#:5407) MassPeaks:383

RawMode:Averaged 32.025-32.035(5406-5408) BasePeak:73.05(1287)

BG Mode:Calc. from Peak Group 1 - Event 1 Q3 Scan

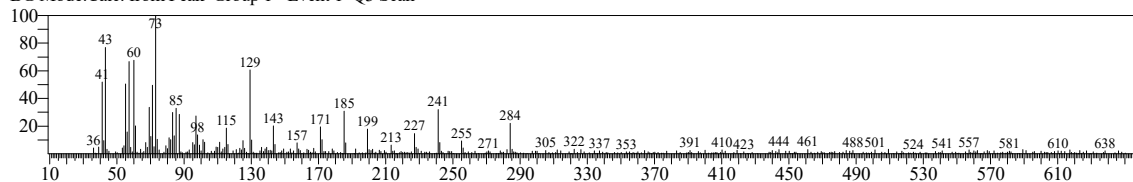

Hit#:1 Entry:34463 Library:NIST20R.lib

SI:91 Formula:C18H36O2 CAS:57-11-4 MolWeight:284 RetIndex:2167

CompName:Octadecanoic acid \$\$ Stearic acid \$\$ n-Octadecanoic acid \$\$ Humko Industriene R \$\$ Hydrofol Acid 150 \$\$ Hystrene S-97 \$\$ Hystrene T-70 \$

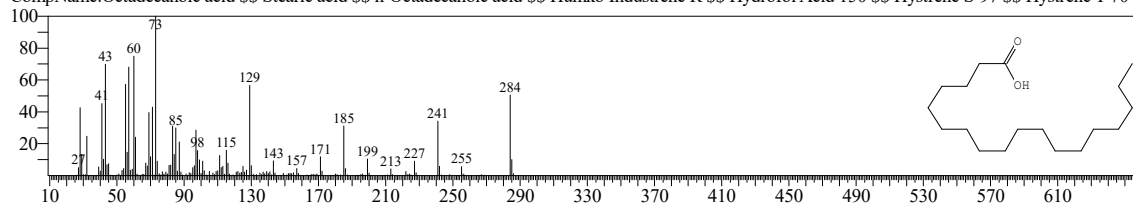

Hit#:2 Entry:29890 Library:NIST20R.lib

SI:88 Formula:C15H30O2 CAS:1002-84-2 MolWeight:242 RetIndex:1869

CompName:Pentadecanoic acid \$\$ Pentadecylic acid \$\$ n-Pentadecanoic acid \$\$ n-Pentadecylic acid

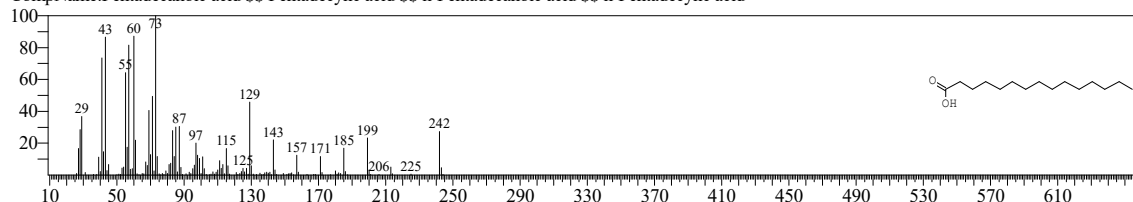

Hit#:3 Entry:31599 Library:NIST20R.lib

SI:86 Formula:C16H32O2 CAS:57-10-3 MolWeight:256 RetIndex:1968

CompName:n-Hexadecanoic acid \$\$ Hexadecanoic acid \$\$ n-Hexadecic acid \$\$ Palmitic acid \$\$ Pentadecanecarboxylic acid \$\$ 1-Pentadecanecarboxylic

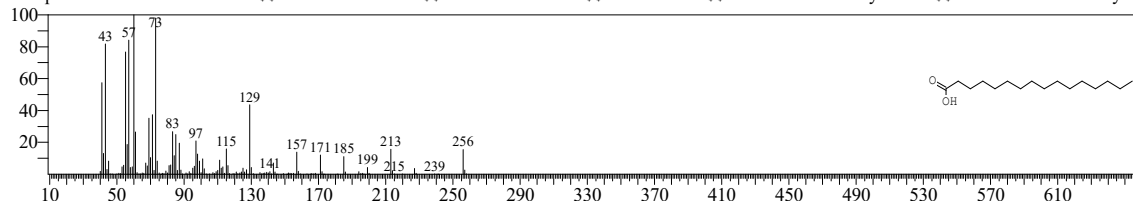

Hit#:4 Entry:81713 Library:NIST20M1.lib

SI:86 Formula:C14H28O2 CAS:544-63-8 MolWeight:228 RetIndex:1769

CompName:Tetradecanoic acid \$\$ Myristic acid \$\$ n-Tetradecanoic acid \$\$ n-Tetradecoic acid \$\$ Neo-Fat 14 \$\$ Univol U 316S \$\$ 1-Tridecanecarboxylic :

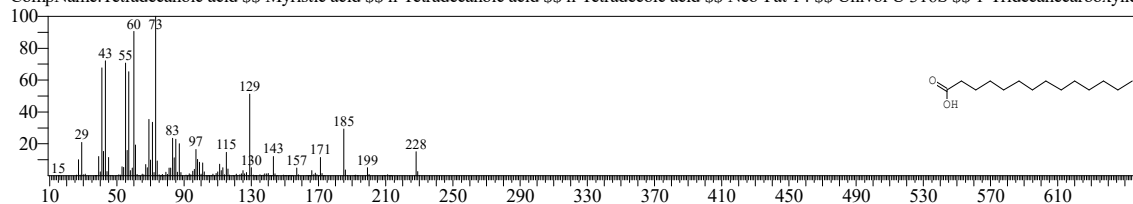

Hit#:5 Entry:178153 Library:NIST20M1.lib

SI:85 Formula:C20H40O2 CAS:506-30-9 MolWeight:312 RetIndex:2366

CompName:Eicosanoic acid \$\$ Arachic acid \$\$ Arachidic acid \$\$ Icosanoic acid \$\$ n-Eicosanoic acid \$\$ Arachidic acid (synthetic)

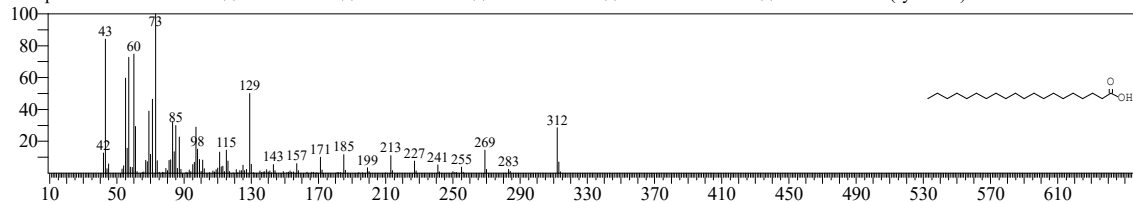

# TNAU

<< Target >>

Line#:21 R.Time:39.495(Scan#:6900) MassPeaks:441

RawMode:Averaged 39.490-39.500(6899-6901) BasePeak:98.00(241)

BG Mode:Calc. from Peak Group 1 - Event 1 Q3 Scan

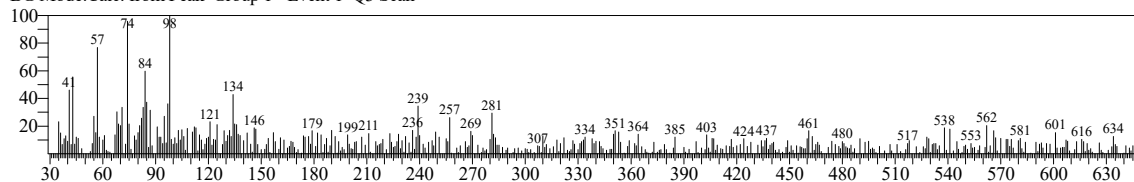

Hit#:1 Entry:30 Library:FA\_ME\_SP2560\_EI\_V3.lib

SI:56 Formula:C23H44O2 CAS:112-86-7 MolWeight:352 RetIndex:3070

CompName:Methyl erucate ; (Z)-docos-13-enoic acid

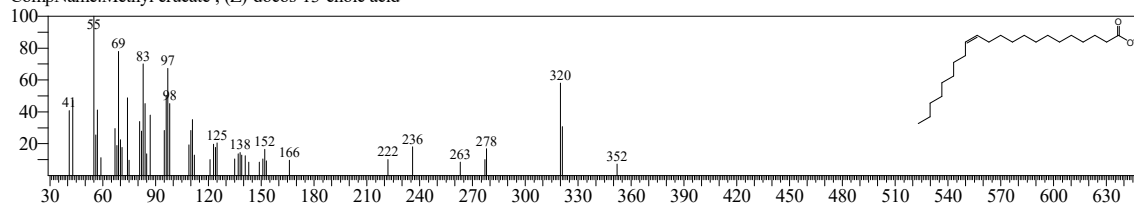

Hit#:2 Entry:37 Library:FA\_ME\_SP2560\_EI\_V3.lib

SI:55 Formula:C25H48O2 CAS:506-37-6 MolWeight:380 RetIndex:3263

CompName:Methyl nervonate ; Tetracos-15-enoic acid

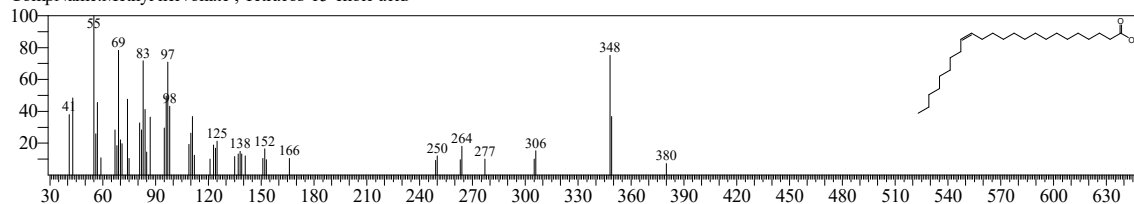

Hit#:3 Entry:24 Library:FA\_ME\_SP2560\_EI\_V3.lib

SI:55 Formula:C21H40O2 CAS:5561-99-9 MolWeight:324 RetIndex:2874

CompName:Methyl cis-11-icosenoate ; Icos-11-enoic acid

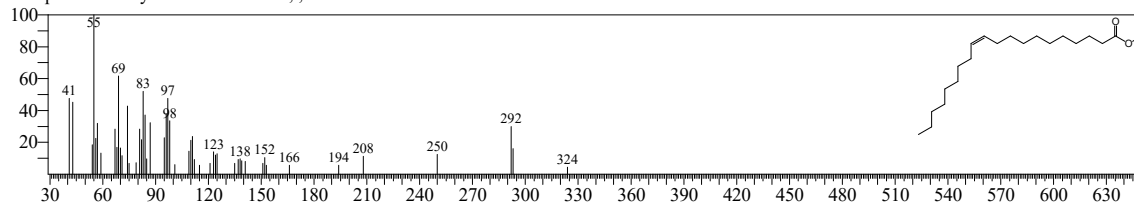

Hit#:4 Entry:17 Library:FA\_ME\_SP2560\_EI\_V3.lib

SI:55 Formula:C19H36O2 CAS:112-79-8 MolWeight:296 RetIndex:2653

CompName:Methyl elaidate ; (E)-octadec-9-enoic acid

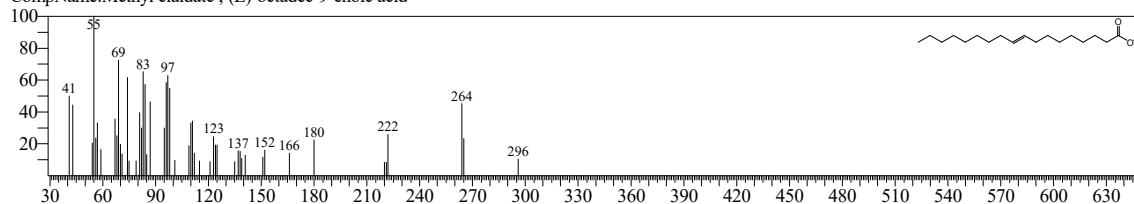

Hit#:5 Entry:18 Library:FA\_ME\_SP2560\_EI\_V3.lib

SI:55 Formula:C19H36O2 CAS:112-80-1 MolWeight:296 RetIndex:2675

CompName:Methyl oleate ; (Z)-octadec-9-enoic acid

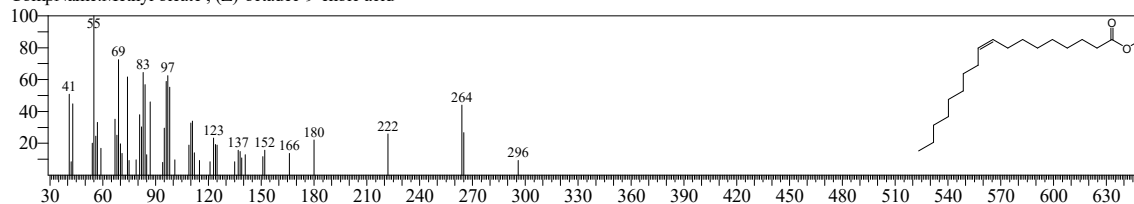

# TNAU

<< Target >>

Line#:22 R.Time:45.615(Scan#:8124) MassPeaks:390

RawMode:Averaged 45.610-45.620(8123-8125) BasePeak:139.10(2681)

BG Mode:Calc. from Peak Group 1 - Event 1 Q3 Scan

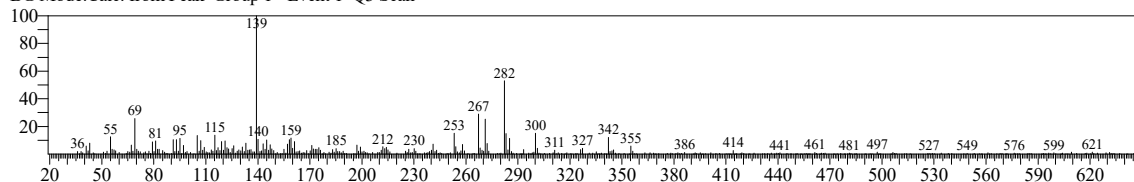

Hit#:1 Entry:8297 Library:NIST20M2.lib

SI:89 Formula:C27H42O3 CAS:512-04-9 MolWeight:414 RetIndex:2844

CompName:Diosgenin \$\$ Spirost-5-en-3-ol, (3.beta.,25R)- \$\$ Spirost-5-en-3.beta.-ol, (25R)- \$\$ Nitrogenin \$\$ 25D-spirost-5-en-3.beta.-ol \$\$ Spiro(8H-nap

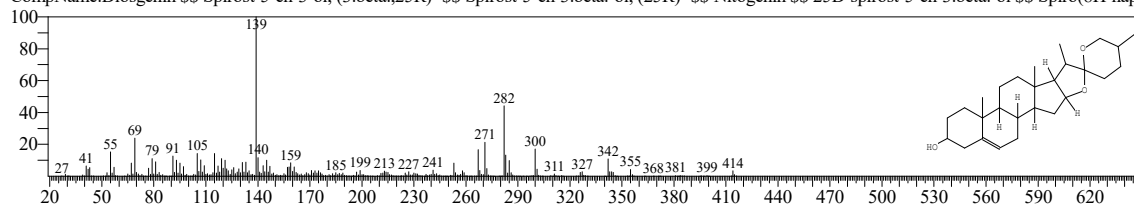

Hit#:2 Entry:14852 Library:NIST20M2.lib

SI:81 Formula:C28H44O3 CAS:116292-24-1 MolWeight:428 RetIndex:2793

CompName:Diosgenin methyl ether \$\$ Diosgenin Me derivative \$\$ (3.beta.,25R)-3-Methoxyspirost-5-ene \$\$ Spirost-5-ene, 3-methoxy-, (3.beta.,25R)-

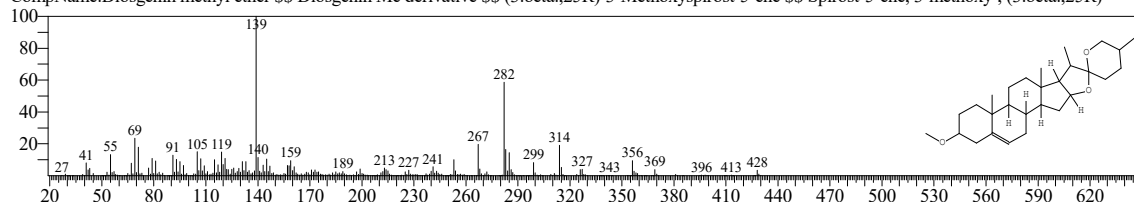

Hit#:3 Entry:41561 Library:NIST20R.lib

SI:80 Formula:C27H42O2 CAS:32277-73-9 MolWeight:398 RetIndex:2713

CompName:Des-N-solasodine \$\$ Furosta-5,20(22)-dien-3-ol #

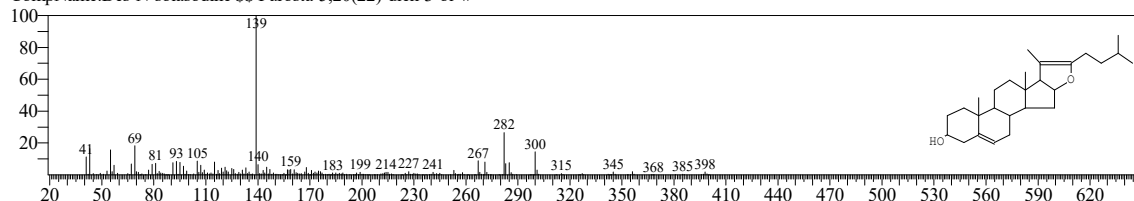

Hit#:4 Entry:24878 Library:NIST20M2.lib

SI:80 Formula:C29H44O4 CAS:1061-54-7 MolWeight:456 RetIndex:2984

CompName:Spirost-5-en-3-ol, acetate, (3.beta.,25R)- \$\$ Diosgenin acetate \$\$ Spirost-5-en-3.beta.-ol, acetate, (25R)- \$\$ Spirost-5-en-3.beta.-ol, acetate, (2

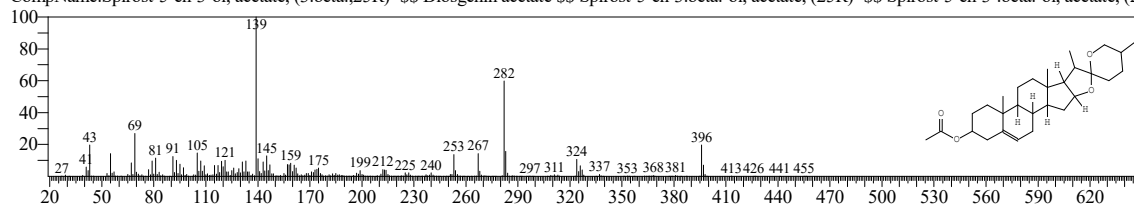

Hit#:5 Entry:42677 Library:NIST20R.lib

SI:74 Formula:C29H44O4 CAS:1180-12-7 MolWeight:456 RetIndex:2984

CompName:Neodiosgenin (3.beta.,25S) acetate \$\$ Spirost-5-en-3-ol, 3-acetate, (3.beta.,25S)- \$\$ Spirost-5-en-3-ol, acetate, (3.beta.,25S)- \$\$ Spirost-5-en-3-

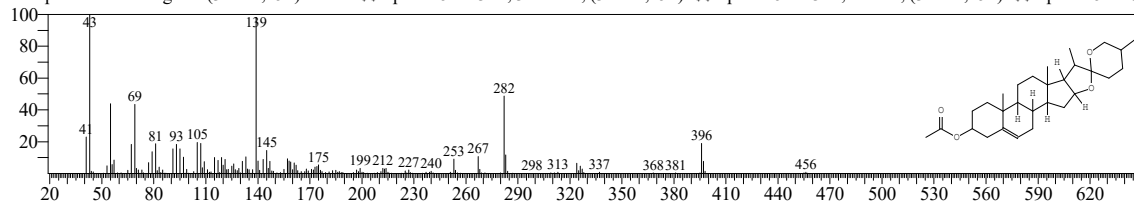

Supplement: Supplementary file 23 [file supplementary]
