# Supplementary material for: Comparative Metabolomics Profiling Reveals Key Metabolites and Associated Pathways Regulating Tuber Dormancy in White Yam (<em>Dioscorea rotundata</em>)
Source: Preprints.org preprint supplement (doi:10.20944/preprints202303.0378.v1), 2023-03-21

# TNAU

## Sample Information

Analyzed by : Admin  
 Analyzed : 02-Sep-22 12:02:44 PM  
 Sample Type : Unknown  
 Level # : 1  
 Sample Name : Sample  
 Sample ID : 7-3  
 IS Amount : [1]=1  
 Sample Amount : 1  
 Dilution Factor : 1  
 Vial # : 8  
 Injection Volume : 2.00  
 Data File : D:\GCMS-8040NX\Sep 2022\Users\01.09.2022\010920222022.qgd  
 Org Data File : D:\GCMS-8040NX\Sep 2022\Users\01.09.2022\010920222022.qgd  
 Method File : D:\GCMS-8040NX\Sep 2022\Method\Scan\_methodfile.qgm  
 Org Method File : D:\GCMS-8040NX\Sep 2022\Method\Scan\_methodfile.qgm  
 Report File :  
 Tuning File : D:\GCMS-8040NX\Aug 2022\Tuning Data\TUNING 25082022.qgt  
 Modified by : Admin  
 Modified : 05-Sep-22 11:05:04 AM

Chromatogram Sample D:\GCMS-8040NX\Sep 2022\Users\01.09.2022\010920222022.qgd

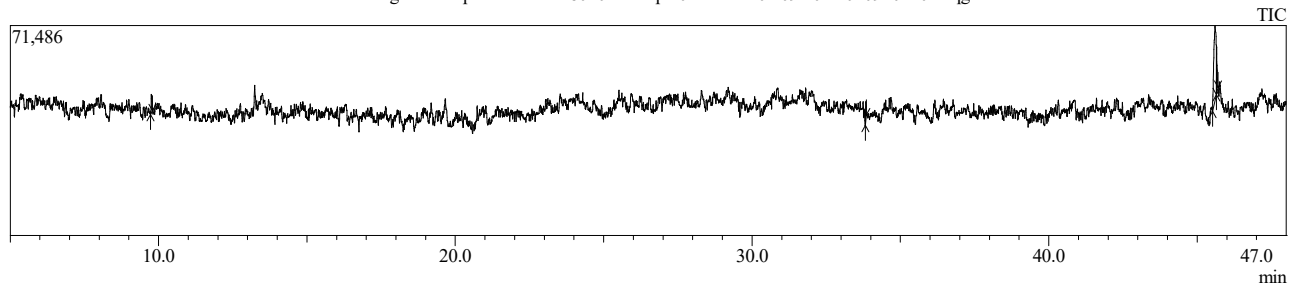

## Peak Report TIC

| Peak# | R.Time | Area   | Area%  | Height | Height% | A/H  | Similarity | Name                         |
|-------|--------|--------|--------|--------|---------|------|------------|------------------------------|
| 1     | 9.758  | 9953   | 5.66   | 6259   | 11.78   | 1.59 | 80         | Pentasiloxane, dodecamethyl- |
| 2     | 33.835 | 5995   | 3.41   | 5973   | 11.25   | 1.00 | 9          | Cystathionine-4TMS           |
| 3     | 45.604 | 133648 | 76.06  | 25239  | 47.52   | 5.30 | 81         | Diosgenin                    |
| 4     | 45.655 | 26120  | 14.86  | 15643  | 29.45   | 1.67 | 15         | Propionylglycine-2TMS        |
|       |        | 175716 | 100.00 | 53114  | 100.00  |      |            |                              |

Library

# TNAU

<< Target >>

Line#:1 R.Time:9.760(Scan#:953) MassPeaks:376  
RawMode:Averaged 9.755-9.765(952-954) BasePeak:281.05(852)  
BG Mode:Calc. from Peak Group 1 - Event 1 Q3 Scan

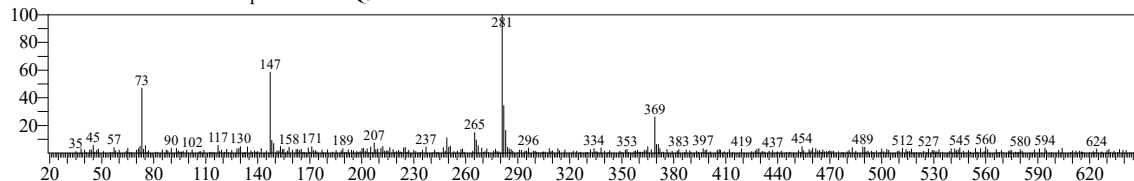

Hit#:1 Entry:40975 Library:NIST20R.lib

SI:80 Formula:C<sub>12</sub>H<sub>36</sub>O<sub>4</sub>Si<sub>5</sub> CAS:141-63-9 MolWeight:384 RetIndex:1068

CompName:Pentasiloxane, dodecamethyl- \$\$ Dodecamethylpentasiloxane \$\$ 1,1,1,3,3,5,5,7,7,9,9,9-Dodecamethylpentasiloxane #

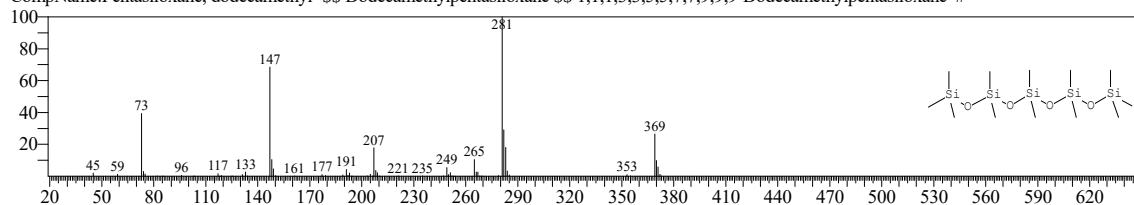

Hit#:2 Entry:249272 Library:NIST20M1.lib

SI:72 Formula:C<sub>12</sub>H<sub>36</sub>O<sub>4</sub>Si<sub>5</sub> CAS:3555-47-3 MolWeight:384 RetIndex:1068

CompName:Trisiloxane, 1,1,1,5,5,5-hexamethyl-3,3-bis[(trimethylsilyloxy)-] \$ Tetrakis(trimethylsiloxy)silane \$ Trisiloxane, 1,1,1,5,5,5-hexamethyl-3,3-b

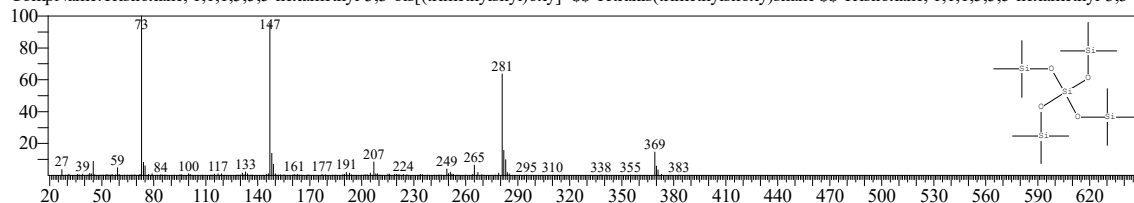

Hit#:3 Entry:184 Library:OA TMS DB5 67min V3.lib

SI:49 Formula:C<sub>14</sub>H<sub>24</sub>O<sub>3</sub>Si<sub>2</sub> CAS:614-75-5 MolWeight:296 RetIndex:1579

CompName:2-Hydroxyphenylacetic acid-2TMS ; 2-(2-hydroxyphenyl)acetic acid

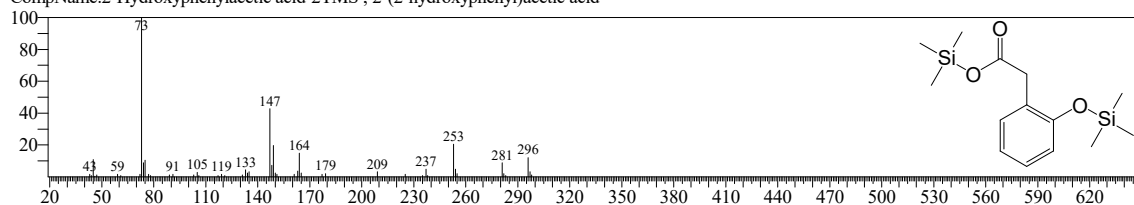

Hit#:4 Entry:203 Library:OA TMS DB5 67min V3.lib

SI:46 Formula:C<sub>13</sub>H<sub>23</sub>NO<sub>2</sub>Si<sub>2</sub> CAS:118-92-3 MolWeight:281 RetIndex:1623

CompName:Anthranilic acid-2TMS ; 2-aminobenzoic acid

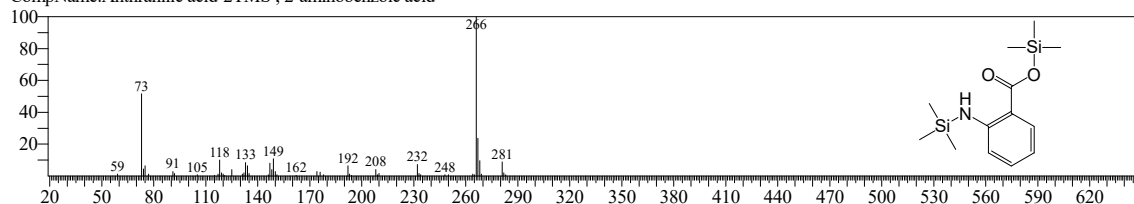

Hit#:5 Entry:200 Library:OA TMS DB5 67min V3.lib

SI:45 Formula:C<sub>14</sub>H<sub>24</sub>O<sub>3</sub>Si<sub>2</sub> CAS:621-37-4 MolWeight:296 RetIndex:1617

CompName:3-Hydroxyphenylacetic acid-2TMS ; 2-(3-hydroxyphenyl)acetic acid

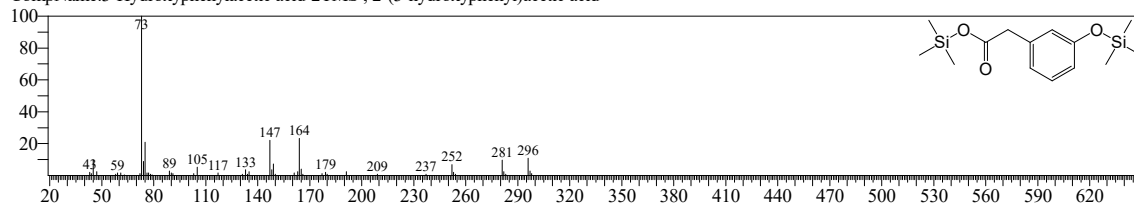

# TNAU

<< Target >>

Line#:2 R.Time:33.835(Scan#:5768) MassPeaks:408

RawMode:Averaged 33.830-33.840(5767-5769) BasePeak:76.00(51)

BG Mode:Calc. from Peak Group 1 - Event 1 Q3 Scan

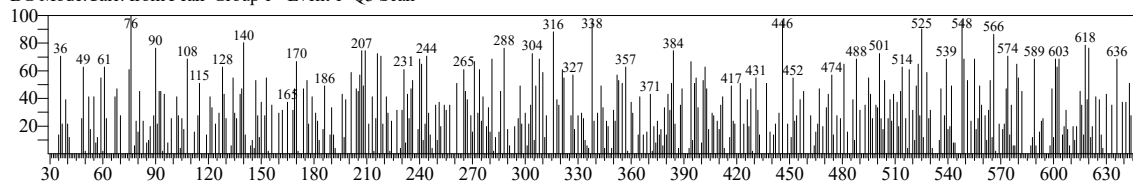

Hit#:1 Entry:489 Library:OA TMS DB5\_67min\_V3.lib

SI:9 Formula:C19H46N2O4SSi4 CAS:56-88-2 MolWeight:510 RetIndex:2233

CompName:Cystathionine-4TMS ; (2S)-2-amino-4-[(2R)-2-amino-2-carboxyethyl]sulfanylbutanoic acid

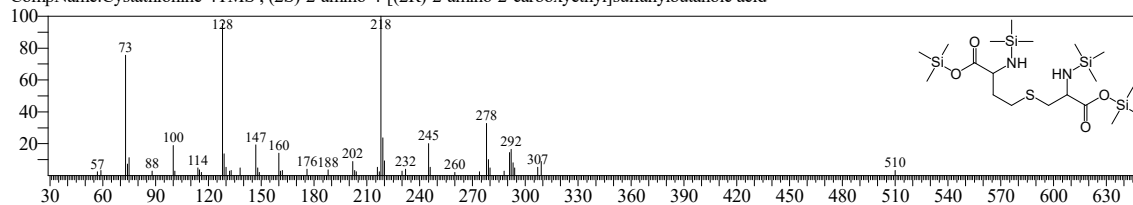

Hit#:2 Entry:130 Library:OA TMS DB5\_67min\_V3.lib

SI:9 Formula:C13H33NO3Si3 CAS:672-15-1 MolWeight:335 RetIndex:1458

CompName:Homoserine-3TMS ; (2S)-2-amino-4-hydroxybutanoic acid

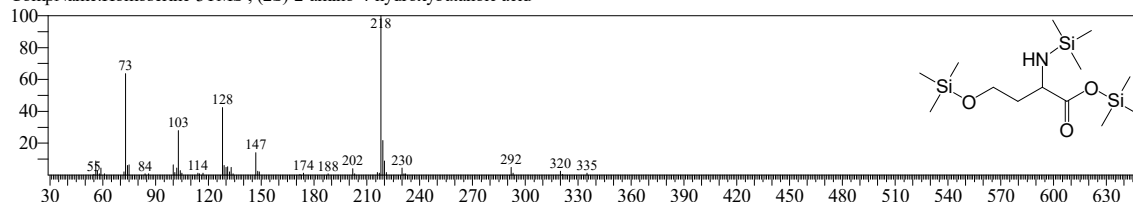

Hit#:3 Entry:329 Library:OA TMS DB5\_67min\_V3.lib

SI:8 Formula:C11H27NO4SSi2 CAS:820-10-0 MolWeight:325 RetIndex:1848

CompName:Methionine sulfone-2TMS ; 2-amino-4-methylsulfonylbutanoic acid

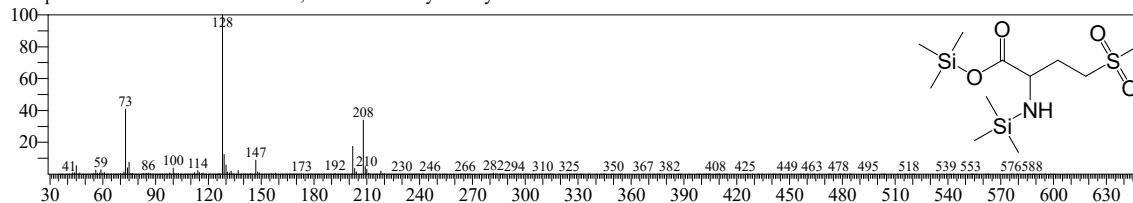

Hit#:4 Entry:476 Library:OA TMS DB5\_67min\_V3.lib

SI:8 Formula:C21H54NO8PSi5 CAS:4151-19-3 MolWeight:619 RetIndex:2152

CompName:Ribulose 5-phosphate-meto-5TMS(2) ; [(2R,3R)-2,3,5-trihydroxy-4-oxopentyl] dihydrogen phosphate

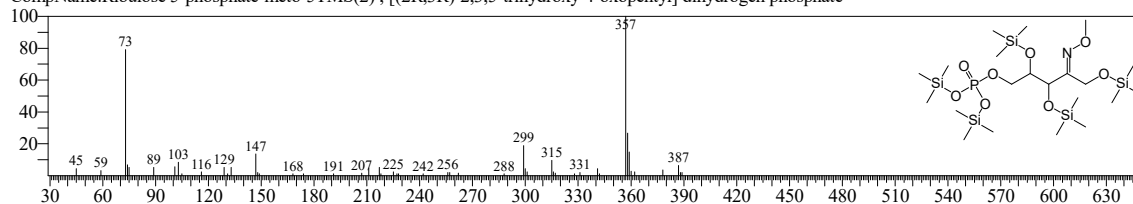

Hit#:5 Entry:394 Library:OA TMS DB5\_67min\_V3.lib

SI:7 Formula:C17H44NO7PSi4 CAS:585-18-2 MolWeight:517 RetIndex:1935

CompName:Erythrose 4-phosphate-meto-4TMS(2) ; [(2R,3R)-2,3-dihydroxy-4-oxobutyl] dihydrogen phosphate

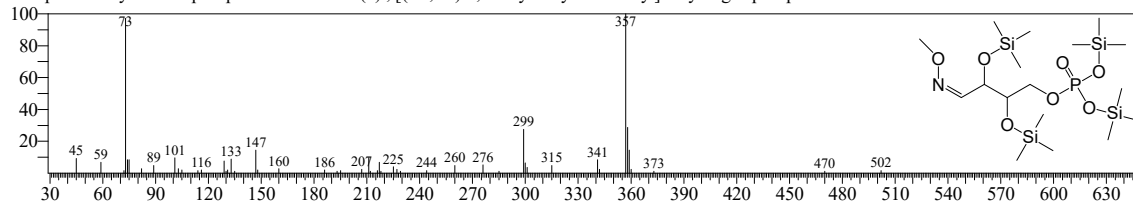

# TNAU

<< Target >>

Line#3 R.Time:45.605(Scan#:8122) MassPeaks:403

RawMode:Averaged 45.600-45.610(8121-8123) BasePeak:139.10(1103)

BG Mode:Calc. from Peak Group 1 - Event 1 Q3 Scan

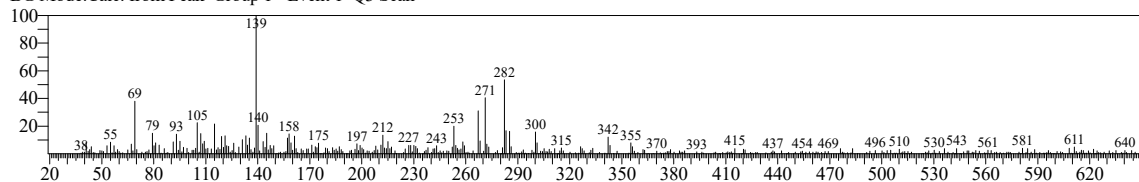

Hit#:1 Entry:8297 Library:NIST20M2.lib

SI:81 Formula:C27H42O3 CAS:512-04-9 MolWeight:414 RetIndex:2844

CompName:Diosgenin \$\$ Spirost-5-en-3-ol, (3.beta.,25R)- \$\$ Spirost-5-en-3.beta.-ol, (25R)- \$\$ Nitrogenin \$\$ 25D-spirost-5-en-3.beta.-ol \$\$ Spiro(8H-nap

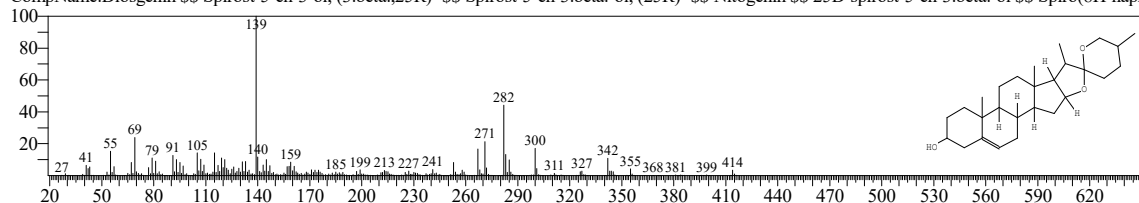

Hit#:2 Entry:14852 Library:NIST20M2.lib

SI:73 Formula:C28H44O3 CAS:116292-24-1 MolWeight:428 RetIndex:2793

CompName:Diosgenin methyl ether \$\$ Diosgenin Me derivative \$\$ (3.beta.,25R)-3-Methoxyspirost-5-ene \$\$ Spirost-5-ene, 3-methoxy-, (3.beta.,25R)-

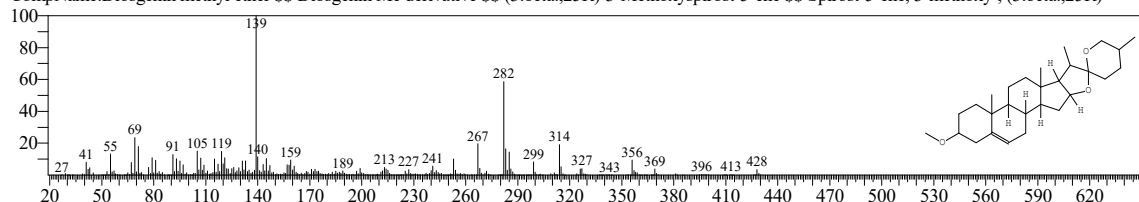

Hit#:3 Entry:41561 Library:NIST20R.lib

SI:72 Formula:C27H42O2 CAS:32277-73-9 MolWeight:398 RetIndex:2713

CompName:Des-N-solasodine \$\$ Furosta-5,20(22)-dien-3-ol #

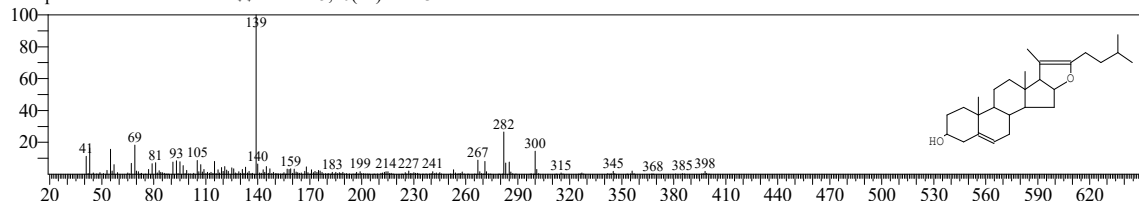

Hit#:4 Entry:24878 Library:NIST20M2.lib

SI:71 Formula:C29H44O4 CAS:1061-54-7 MolWeight:456 RetIndex:2984

CompName:Spirost-5-en-3-ol, acetate, (3.beta.,25R)- \$\$ Diosgenin acetate \$\$ Spirost-5-en-3.beta.-ol, acetate, (25R)- \$\$ Spirost-5-en-3.beta.-ol, acetate, (2

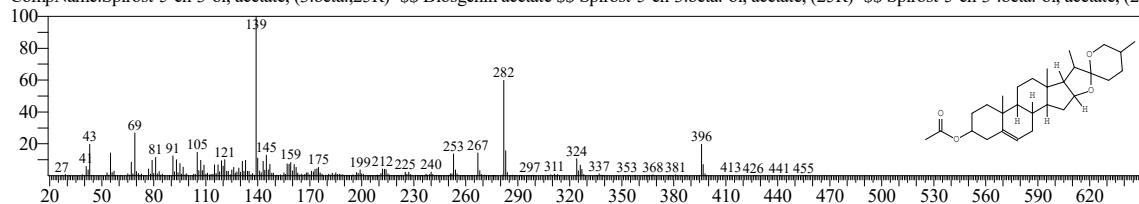

Hit#:5 Entry:38 Library:FA ME\_SP2560 EI\_V3.lib

SI:41 Formula:C23H34O2 CAS:6217-54-5 MolWeight:342 RetIndex:3514

CompName:Methyl cis-4,7,10,13,16,19-Docosahexaenoate ; Docosa-4,7,10,13,16,19-hexaenoic acid

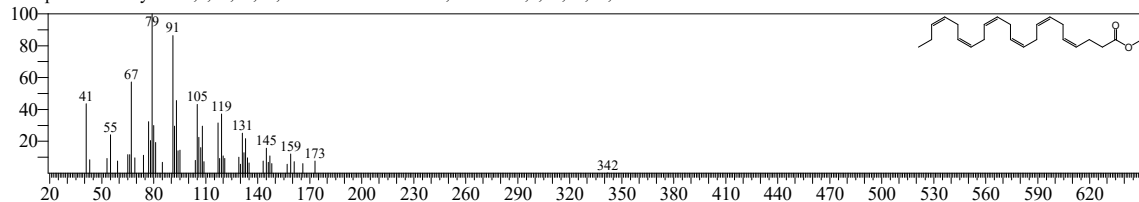

# TNAU

<< Target >>

Line#:4 R.Time:45.655(Scan#:8132) MassPeaks:326

RawMode:Averaged 45.650-45.660(8131-8133) BasePeak:157.10(76)

BG Mode:Calc. from Peak Group 1 - Event 1 Q3 Scan

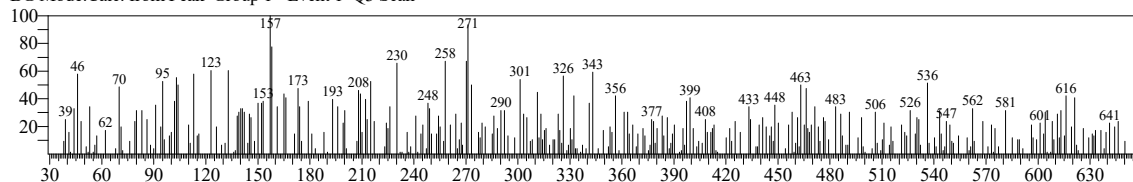

Hit#:1 Entry:120 Library:OA TMS DB5 67min V3.lib

SI:15 Formula:C11H25NO3Si2 CAS:21709-90-0 MolWeight:275 RetIndex:1428

CompName:Propionylglycine-2TMS ; 2-(propanoylamino)acetic acid

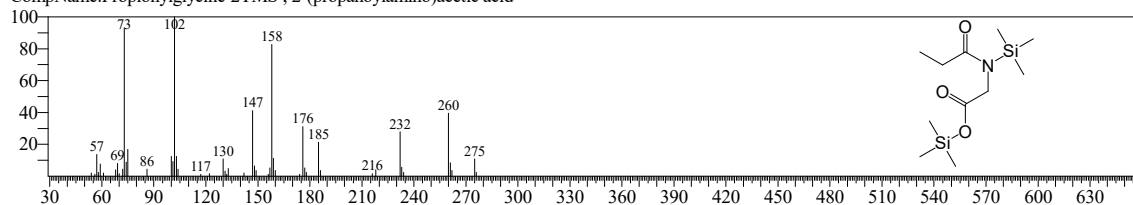

Hit#:2 Entry:151 Library:OA TMS DB5 67min V3.lib

SI:14 Formula:C9H13NO3Si CAS:100-02-7 MolWeight:211 RetIndex:1518

CompName:p-Nitrophenol-TMS ; 4-nitrophenol

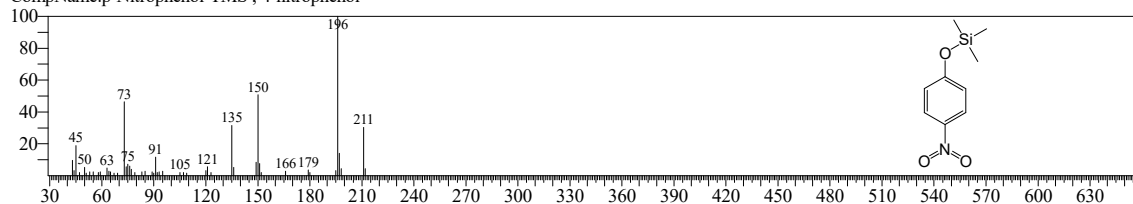

Hit#:3 Entry:113 Library:OA TMS DB5 67min V3.lib

SI:14 Formula:C11H27NO2Si2 CAS:660-88-8 MolWeight:261 RetIndex:1400

CompName:5-Aminovaleric acid-2TMS ; 5-aminopentanoic acid

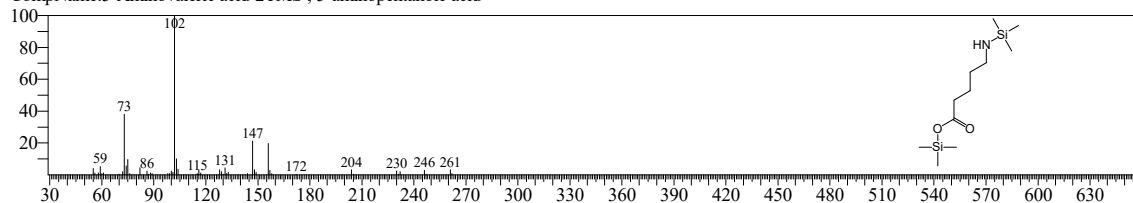

Hit#:4 Entry:315 Library:OA TMS DB5 67min V3.lib

SI:14 Formula:C16H30O4Si3 CAS:99-50-3 MolWeight:370 RetIndex:1833

CompName:Protocatechuic acid-3TMS ; 3,4-dihydroxybenzoic acid

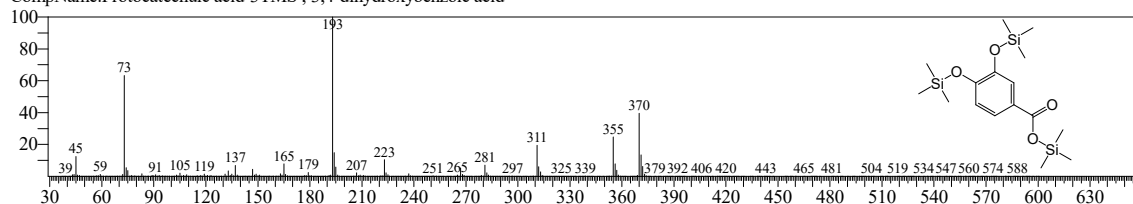

Hit#:5 Entry:76 Library:OA TMS DB5 67min V3.lib

SI:13 Formula:C12H29NO2Si2 CAS:61-90-5 MolWeight:275 RetIndex:1278

CompName:Leucine-2TMS ; (2S)-2-amino-4-methylpentanoic acid

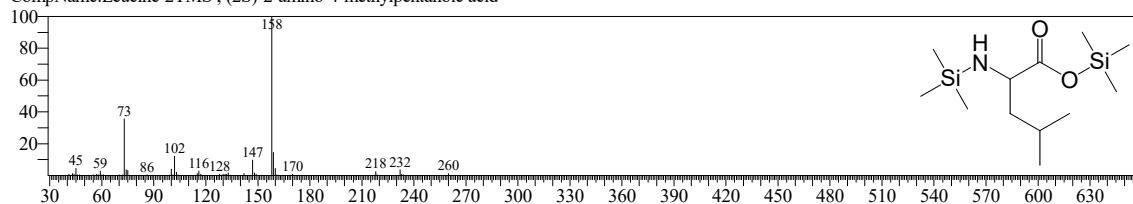

Supplement: Supplementary file 26 [file supplementary]
