# Supplementary material for: Comparative Metabolomics Profiling Reveals Key Metabolites and Associated Pathways Regulating Tuber Dormancy in White Yam (<em>Dioscorea rotundata</em>)
Source: Preprints.org preprint supplement (doi:10.20944/preprints202303.0378.v1), 2023-03-21

# TNAU

## Sample Information

Analyzed by : Admin  
 Analyzed : 04-Aug-22 11:24:52 PM  
 Sample Type : Unknown  
 Level # : 1  
 Sample Name : C101-1  
 Sample ID : C101-1  
 IS Amount : [1]=1  
 Sample Amount : 1  
 Dilution Factor : 1  
 Vial # : 11  
 Injection Volume : 1.00  
 Data File : D:\GCMS-8040NX\Aug 2022\Users\04.08.2022\Data files\04082022-011.qgd  
 Org Data File : D:\GCMS-8040NX\Aug 2022\Users\04.08.2022\Data files\04082022-011.qgd  
 Method File : D:\GCMS-8040NX\Aug 2022\Users\04.08.2022\Method file\27072022\_methodfile.qgm  
 Org Method File : D:\GCMS-8040NX\Aug 2022\Users\04.08.2022\Method file\27072022\_methodfile.qgm  
 Report File :  
 Tuning File : D:\GCMS-8040NX\Aug 2022\Tuning Data\TUNING 04082022.qgt  
 [Comment]  
 Jerry samples  
 Modified by : Admin  
 Modified : 05-Aug-22 4:27:50 PM

Chromatogram C101-1 D:\GCMS-8040NX\Aug 2022\Users\04.08.2022\Data files\04082022-011.qgd

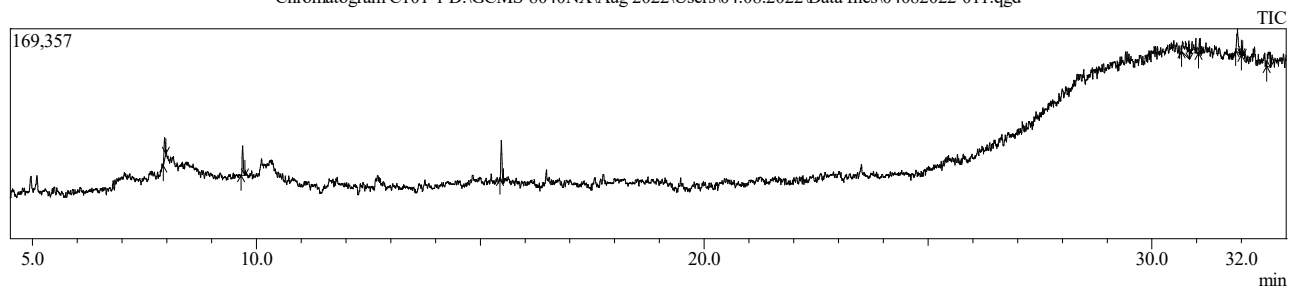

Peak Report TIC

| Peak# | R.Time | Area   | Area%  | Height | Height% | A/H  | Similarity | Name                            |
|-------|--------|--------|--------|--------|---------|------|------------|---------------------------------|
| 1     | 7.946  | 30490  | 10.09  | 18226  | 13.12   | 1.67 | 86         | Undecane                        |
| 2     | 9.692  | 42265  | 13.98  | 23710  | 17.07   | 1.78 | 91         | Undecane                        |
| 3     | 15.470 | 55758  | 18.45  | 32755  | 23.58   | 1.70 | 88         | 2,4-Di-tert-butylphenol         |
| 4     | 30.823 | 69780  | 23.09  | 14130  | 10.17   | 4.94 | 37         | 3-Hydroxybenzoic acid-2TMS      |
| 5     | 31.061 | 11705  | 3.87   | 11839  | 8.52    | 0.99 | 38         | Epinephrine-3TMS                |
| 6     | 31.910 | 45720  | 15.13  | 18556  | 13.36   | 2.46 | 36         | Suberic acid-2TMS               |
| 7     | 32.014 | 6449   | 2.13   | 7840   | 5.64    | 0.82 | 25         | Anthranilic acid-2TMS           |
| 8     | 32.621 | 40090  | 13.26  | 11878  | 8.55    | 3.38 | 44         | 3,4-Dihydroxymandelic acid-4TMS |
|       |        | 302257 | 100.00 | 138934 | 100.00  |      |            |                                 |

Library

# TNAU

<< Target >>

Line#:1 R.Time:7.945(Scan#:690) MassPeaks:223

RawMode:Averaged 7.940-7.950(689-691) BasePeak:57.10(4453)

BG Mode:Calc. from Peak Group 1 - Event 1 Q3 Scan

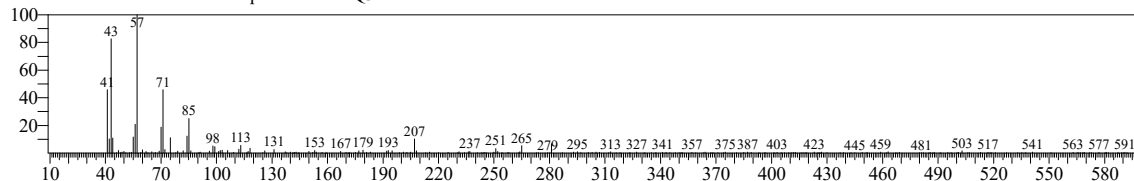

Hit#:1 Entry:12897 Library:NIST20R.lib

SI:86 Formula:C11H24 CAS:1120-21-4 MolWeight:156 RetIndex:1100

CompName:Undecane \$\$ n-Undecane \$\$ Hendecane \$\$ n-C11H24 \$\$ UN 2330

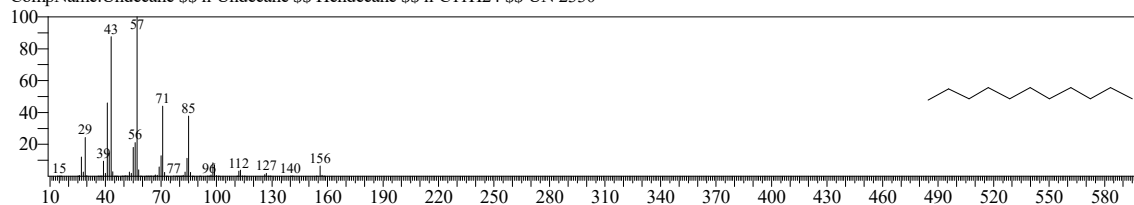

Hit#:2 Entry:40226 Library:NIST20M1.lib

SI:85 Formula:C13H28 CAS:629-50-5 MolWeight:184 RetIndex:1300

CompName:Tridecane \$\$ n-Tridecane \$\$ Tridecane, n-

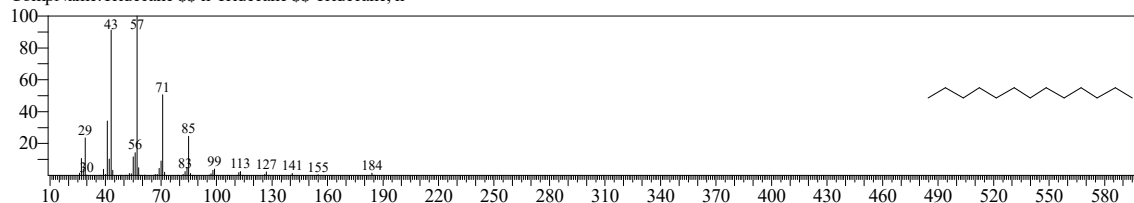

Hit#:3 Entry:13604 Library:NIST20M1.lib

SI:85 Formula:C10H22 CAS:124-18-5 MolWeight:142 RetIndex:1000

CompName:Decane \$\$ n-Decane \$\$ n-C10H22 \$\$ UN 2247

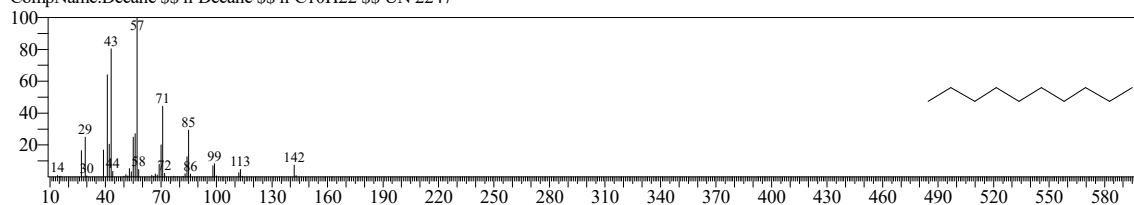

Hit#:4 Entry:16191 Library:NIST20R.lib

SI:85 Formula:C12H26 CAS:112-40-3 MolWeight:170 RetIndex:1200

CompName:Dodecane \$\$ n-Dodecane \$\$ Adakane 12 \$\$ Ba 51-090453 \$\$ CH3(CH2)10CH3 \$\$ Bihexyl \$\$ Dihexyl \$\$ Duodecane \$\$ NSC 8714

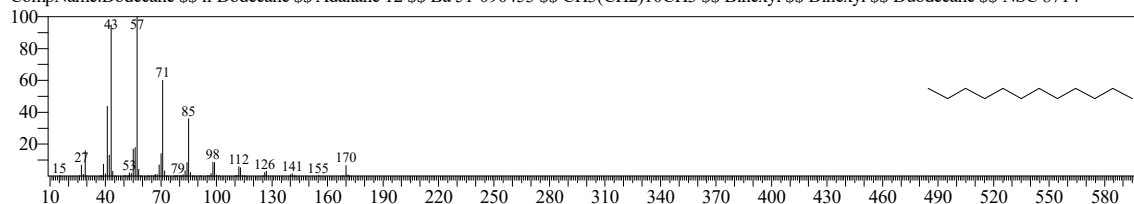

Hit#:5 Entry:27737 Library:NIST20R.lib

SI:84 Formula:C16H34 CAS:544-76-3 MolWeight:226 RetIndex:1600

CompName:Hexadecane \$\$ n-Cetane \$\$ n-Hexadecane \$\$ Cetane

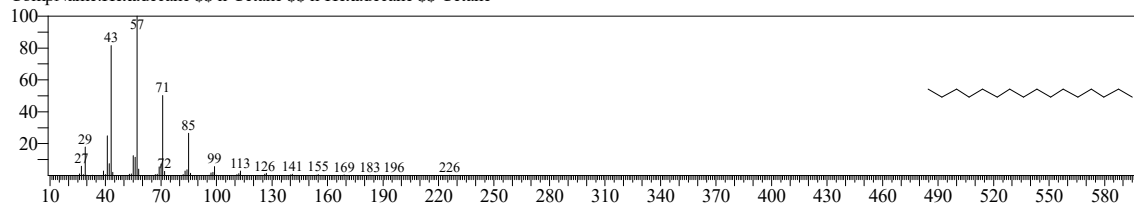

# TNAU

<< Target >>

Line# 2 R.Time: 9.690 (Scan#: 1039) MassPeaks: 279

RawMode: Averaged 9.685-9.695 (1038-1040) BasePeak: 57.05 (5705)

BG Mode: Calc. from Peak Group 1 - Event 1 Q3 Scan

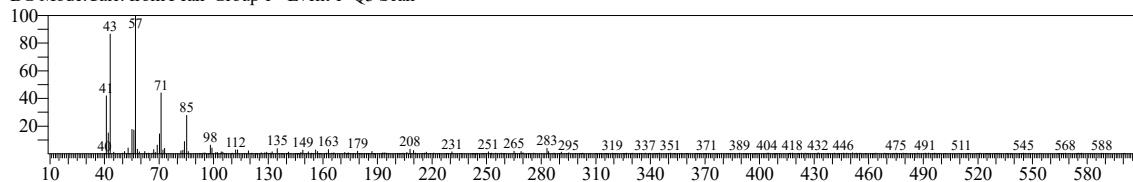

Hit#: 1 Entry: 12897 Library: NIST20R.lib

SI: 91 Formula: C<sub>11</sub>H<sub>24</sub> CAS: 1120-21-4 MolWeight: 156 RetIndex: 1100

CompName: Undecane \$\$ n-Undecane \$\$ Hendecane \$\$ n-C<sub>11</sub>H<sub>24</sub> \$\$ UN 2330

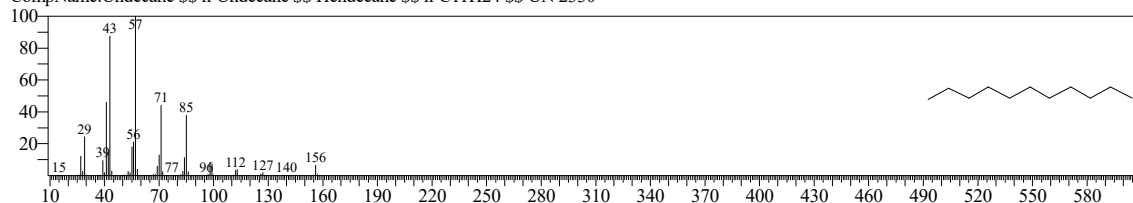

Hit#: 2 Entry: 40226 Library: NIST20M1.lib

SI: 89 Formula: C<sub>13</sub>H<sub>28</sub> CAS: 629-50-5 MolWeight: 184 RetIndex: 1300

CompName: Tridecane \$\$ n-Tridecane \$\$ Tridecane, n-

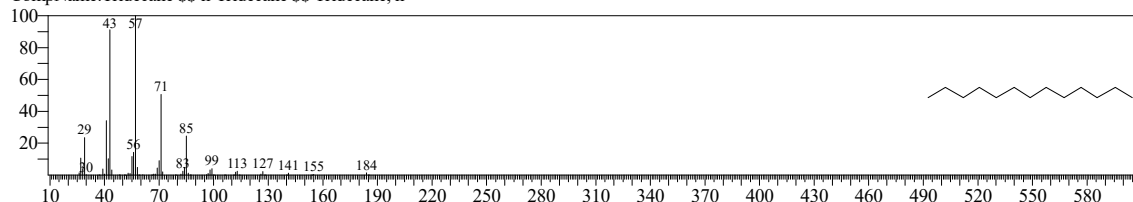

Hit#: 3 Entry: 16191 Library: NIST20R.lib

SI: 89 Formula: C<sub>12</sub>H<sub>26</sub> CAS: 112-40-3 MolWeight: 170 RetIndex: 1200

CompName: Dodecane \$\$ n-Dodecane \$\$ Adakane 12 \$\$ Ba 51-090453 \$\$ CH<sub>3</sub>(CH<sub>2</sub>)<sub>10</sub>CH<sub>3</sub> \$\$ Bihexyl \$\$ Dihexyl \$\$ Duodecane \$\$ NSC 8714

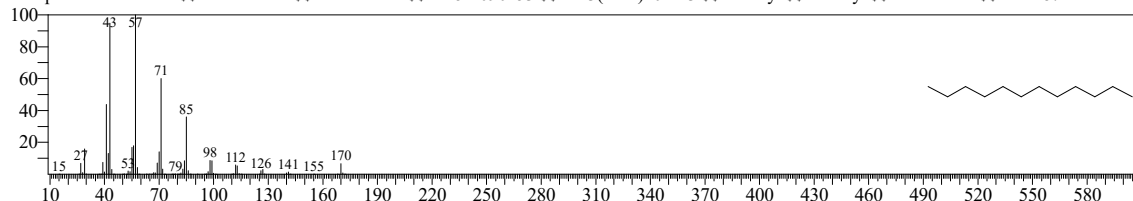

Hit#: 4 Entry: 27736 Library: NIST20R.lib

SI: 88 Formula: C<sub>16</sub>H<sub>34</sub> CAS: 544-76-3 MolWeight: 226 RetIndex: 1600

CompName: Hexadecane \$\$ n-Cetane \$\$ n-Hexadecane \$\$ Cetane

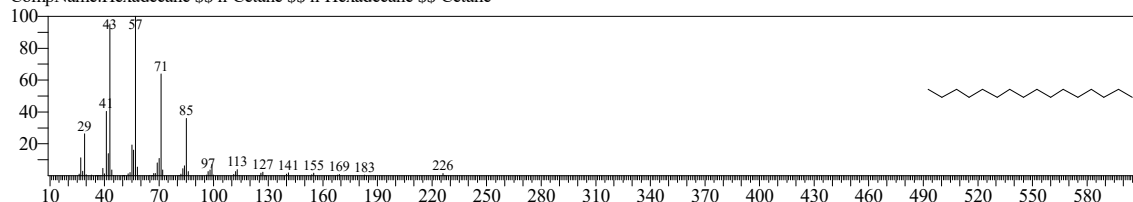

Hit#: 5 Entry: 13604 Library: NIST20M1.lib

SI: 88 Formula: C<sub>10</sub>H<sub>22</sub> CAS: 124-18-5 MolWeight: 142 RetIndex: 1000

CompName: Decane \$\$ n-Decane \$\$ n-C<sub>10</sub>H<sub>22</sub> \$\$ UN 2247

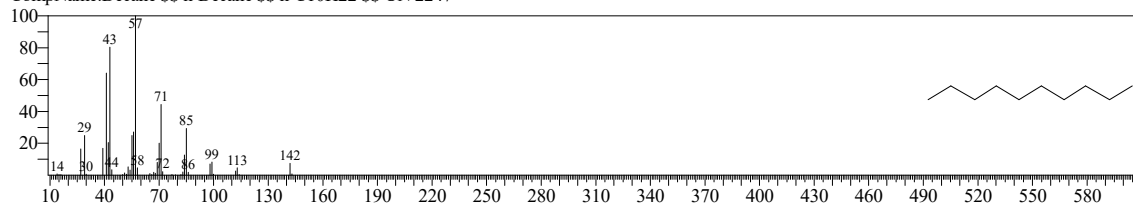

# TNAU

<< Target >>

Line#3 R.Time:15.470(Scan#:2195) MassPeaks:271

RawMode:Averaged 15.465-15.475(2194-2196) BasePeak:191.15(11429)

BG Mode:Calc. from Peak Group 1 - Event 1 Q3 Scan

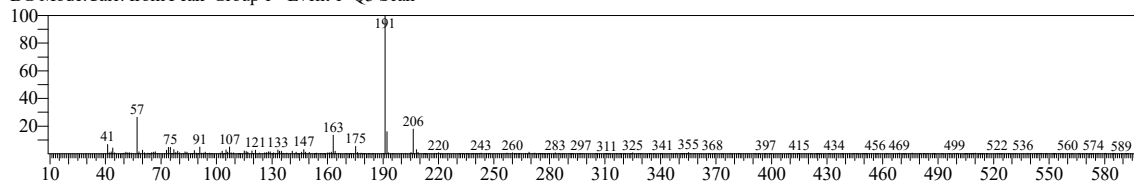

Hit#1 Entry:24088 Library:NIST20R.lib

SI:88 Formula:C14H22O CAS:96-76-4 MolWeight:206 RetIndex:1555

CompName:2,4-Di-tert-butylphenol \$\$ Phenol, 2,4-bis(1,1-dimethylethyl)- \$\$ Phenol, 2,4-di-tert-butyl- \$\$ 2,4-di-t-Butylphenol \$\$ 1-Hydroxy-2,4-di-tert-bu

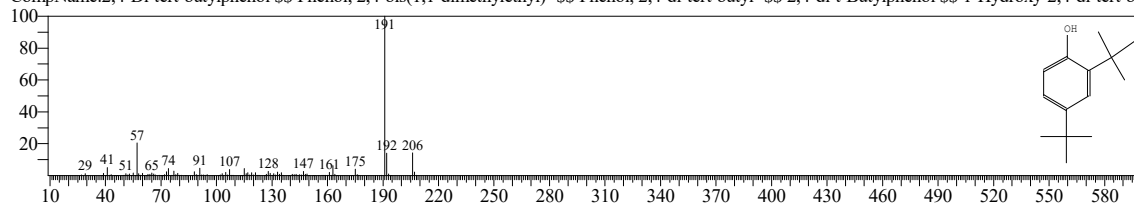

Hit#2 Entry:24110 Library:NIST20R.lib

SI:85 Formula:C14H22O CAS:1138-52-9 MolWeight:206 RetIndex:1555

CompName:Phenol, 3,5-bis(1,1-dimethylethyl)- \$\$ Phenol, 3,5-di-tert-butyl- \$\$ 3,5-Di-tert-butylphenol \$\$ Phenol, 3,5-bis(t-butyl) \$\$ 3,5-Di-t-butylphenol \$

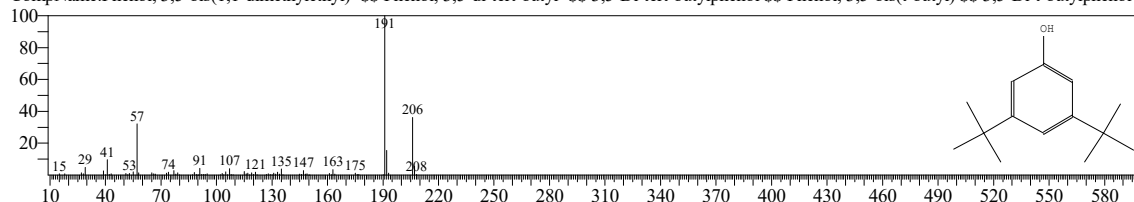

Hit#3 Entry:59031 Library:NIST20M1.lib

SI:85 Formula:C14H22O CAS:128-39-2 MolWeight:206 RetIndex:1555

CompName:Phenol, 2,6-bis(1,1-dimethylethyl)- \$\$ Phenol, 2,6-di-tert-butyl- \$\$ 2,6-Bis(tert-butyl)phenol \$\$ 2,6-Bis(1,1-dimethylethyl)phenol \$\$ 2,6-Di-tert

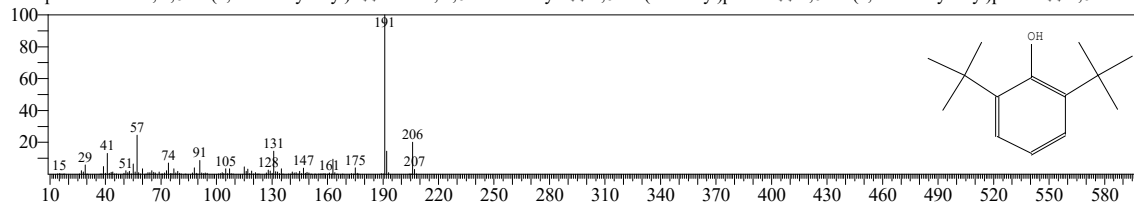

Hit#4 Entry:24098 Library:NIST20R.lib

SI:84 Formula:C14H22O CAS:5875-45-6 MolWeight:206 RetIndex:1555

CompName:Phenol, 2,5-bis(1,1-dimethylethyl)- \$\$ Phenol, 2,5-di-tert-butyl- \$\$ 2,5-Di-tert-butylphenol \$\$ 2,5-bis(1,1-Dimethylethyl)phenol

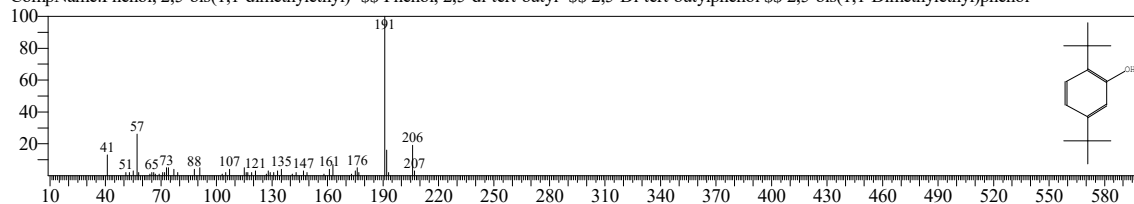

Hit#5 Entry:103047 Library:NIST20M1.lib

SI:83 Formula:C16H24O2 CAS:104316-22-5 MolWeight:248 RetIndex:1714

CompName:2,4-Di-tert-butylphenol, acetate

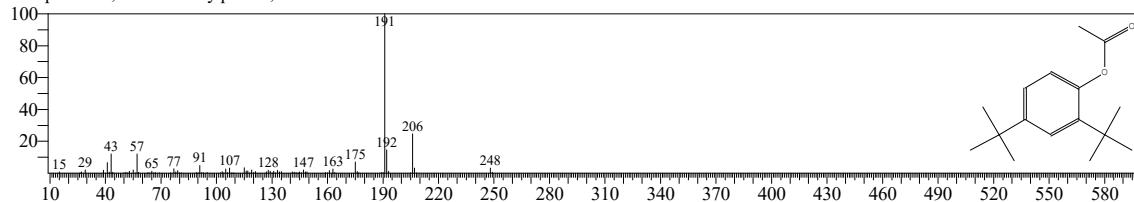

# TNAU

<< Target >>

Line#:4 R.Time:30.825(Scan#:5266) MassPeaks:314

RawMode:Averaged 30.820-30.830(5265-5267) BasePeak:207.05(1274)

BG Mode:Calc. from Peak Group 1 - Event 1 Q3 Scan

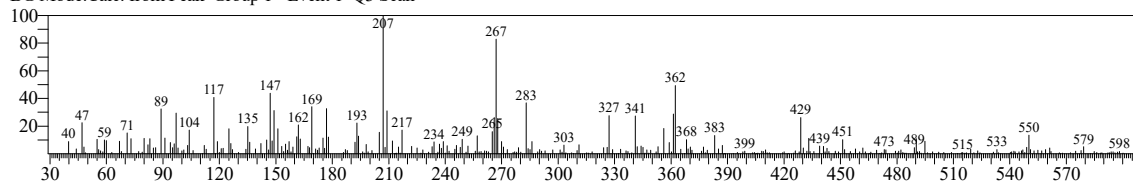

Hit#:1 Entry:179 Library:OA\_TMS\_DB5\_67min\_V3.lib

SI:37 Formula:C<sub>13</sub>H<sub>22</sub>O<sub>3</sub>Si<sub>2</sub> CAS:99-06-9 MolWeight:282 RetIndex:1572

CompName:3-Hydroxybenzoic acid-2TMS ; 3-hydroxybenzoic acid

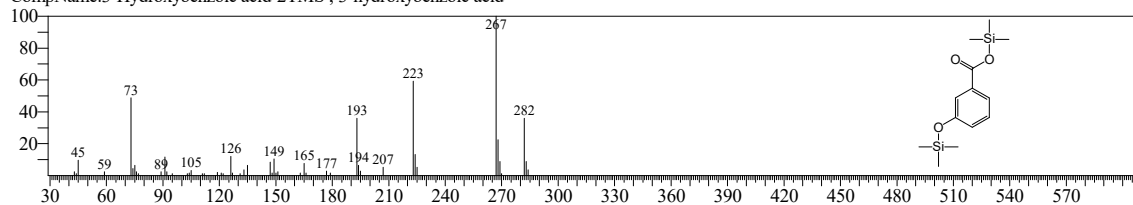

Hit#:2 Entry:211 Library:OA\_TMS\_DB5\_67min\_V3.lib

SI:36 Formula:C<sub>13</sub>H<sub>22</sub>O<sub>3</sub>Si<sub>2</sub> CAS:99-96-7 MolWeight:282 RetIndex:1636

CompName:4-Hydroxybenzoic acid-2TMS ; 4-hydroxybenzoic acid

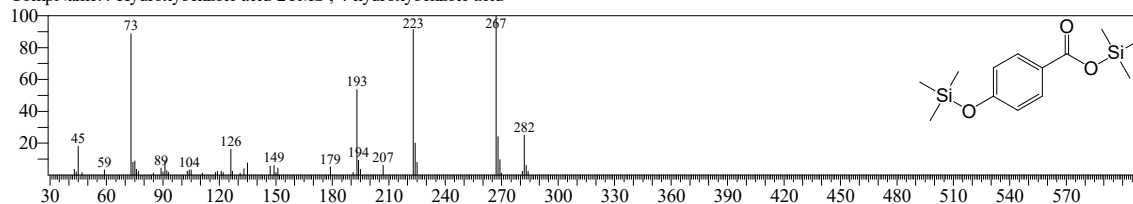

Hit#:3 Entry:341 Library:OA\_TMS\_DB5\_67min\_V3.lib

SI:35 Formula:C<sub>18</sub>H<sub>34</sub>O<sub>4</sub>Si<sub>3</sub> CAS:3247-75-4 MolWeight:398 RetIndex:1864

CompName:3-(3-Hydroxyphenyl)-3-hydroxypropionic acid-3TMS ; 3-hydroxy-3-(3-hydroxyphenyl)propanoic acid

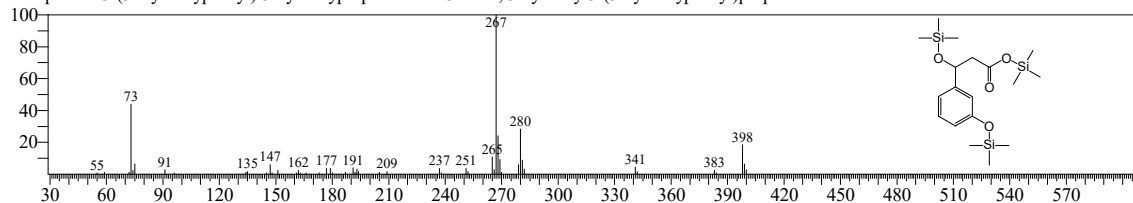

Hit#:4 Entry:294 Library:OA\_TMS\_DB5\_67min\_V3.lib

SI:33 Formula:C<sub>15</sub>H<sub>26</sub>O<sub>4</sub>Si<sub>2</sub> CAS:306-08-1 MolWeight:326 RetIndex:1782

CompName:Homovanillic acid-2TMS ; 2-(4-hydroxy-3-methoxyphenyl)acetic acid

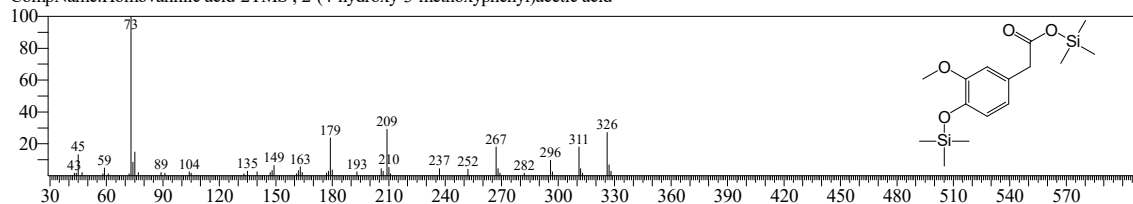

Hit#:5 Entry:194 Library:OA\_TMS\_DB5\_67min\_V3.lib

SI:33 Formula:C<sub>15</sub>H<sub>26</sub>O<sub>3</sub>Si<sub>2</sub> CAS:828-01-3 MolWeight:310 RetIndex:1599

CompName:3-Phenyllactic acid-2TMS ; 2-hydroxy-3-phenylpropanoic acid

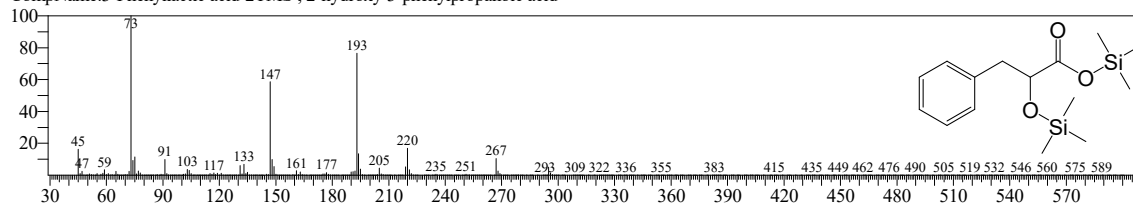

# TNAU

<< Target >>

Line#:5 R.Time:31.060(Scan#:5313) MassPeaks:293

RawMode:Averaged 31.055-31.065(5312-5314) BasePeak:207.05(2586)

BG Mode:Calc. from Peak Group 1 - Event 1 Q3 Scan

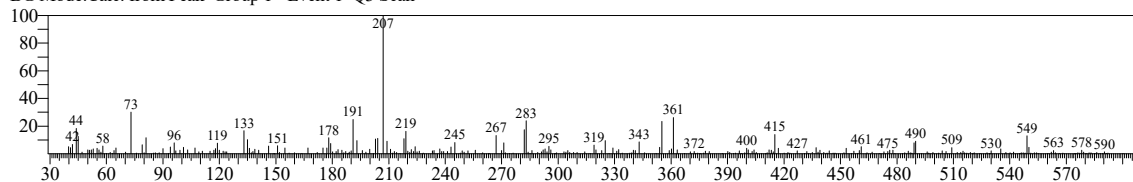

Hit#:1 Entry:343 Library:OA\_TMS\_DB5\_67min\_V3.lib

SI:38 Formula:C18H37NO3Si3 CAS:51-43-4 MolWeight:399 RetIndex:1868

CompName:Epinephrine-3TMS ; 4-[(1R)-1-hydroxy-2-(methylamino)ethyl]benzene-1,2-diol

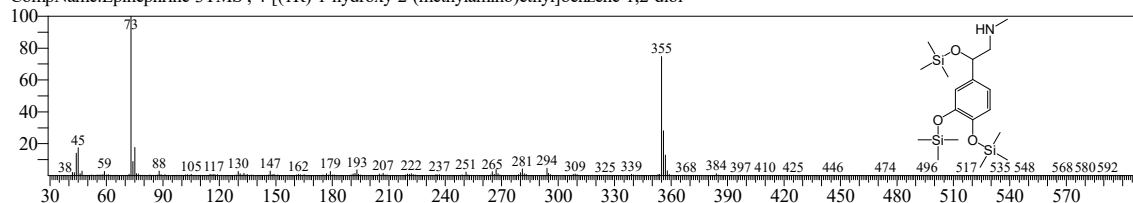

Hit#:2 Entry:211 Library:OA\_TMS\_DB5\_67min\_V3.lib

SI:38 Formula:C13H22O3Si2 CAS:99-96-7 MolWeight:282 RetIndex:1636

CompName:4-Hydroxybenzoic acid-2TMS ; 4-hydroxybenzoic acid

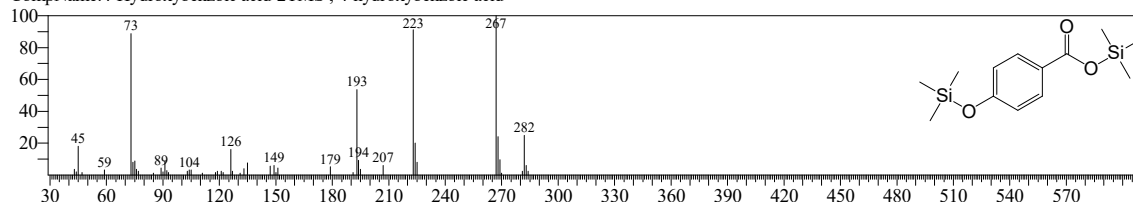

Hit#:3 Entry:402 Library:OA\_TMS\_DB5\_67min\_V3.lib

SI:37 Formula:C20H42O4Si4 CAS:775-01-9 MolWeight:458 RetIndex:1942

CompName:3,4-Dihydroxymandelic acid-4TMS ; 2-(3,4-dihydroxyphenyl)-2-hydroxyacetic acid

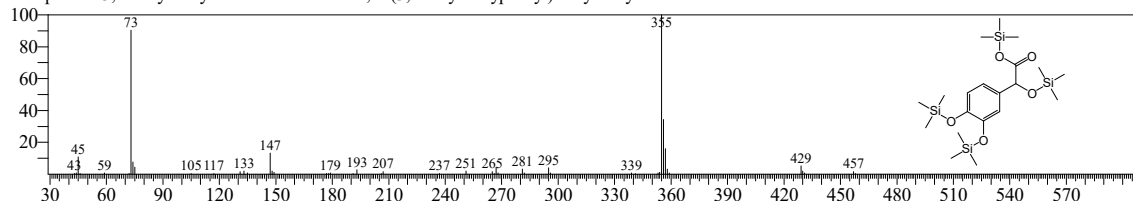

Hit#:4 Entry:413 Library:OA\_TMS\_DB5\_67min\_V3.lib

SI:37 Formula:C18H35NO3Si3 CAS:60-18-4 MolWeight:397 RetIndex:1958

CompName:Tyrosine-3TMS ; (2S)-2-amino-3-(4-hydroxyphenyl)propanoic acid

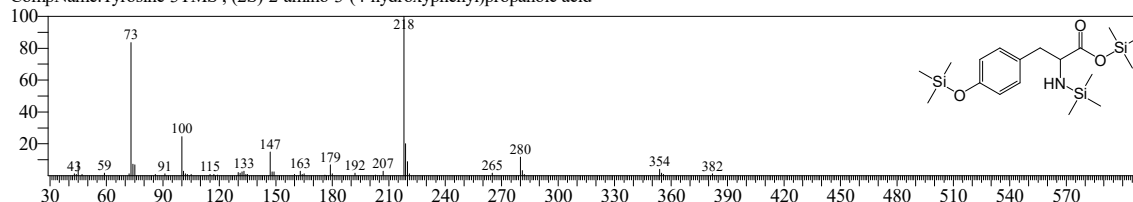

Hit#:5 Entry:463 Library:OA\_TMS\_DB5\_67min\_V3.lib

SI:37 Formula:C21H43NO4Si4 CAS:59-92-7 MolWeight:485 RetIndex:2123

CompName:Dopa-4TMS ; (2S)-2-amino-3-(3,4-dihydroxyphenyl)propanoic acid

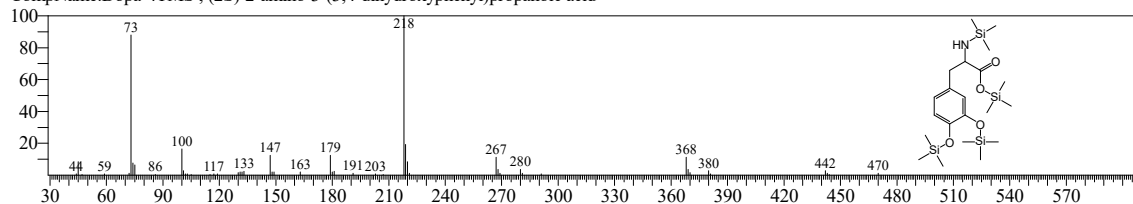

# TNAU

<< Target >>

Line#6 R.Time:31.910(Scan#:5483) MassPeaks:315

RawMode:Averaged 31.905-31.915(5482-5484) BasePeak:139.15(1610)

BG Mode:Calc. from Peak Group 1 - Event 1 Q3 Scan

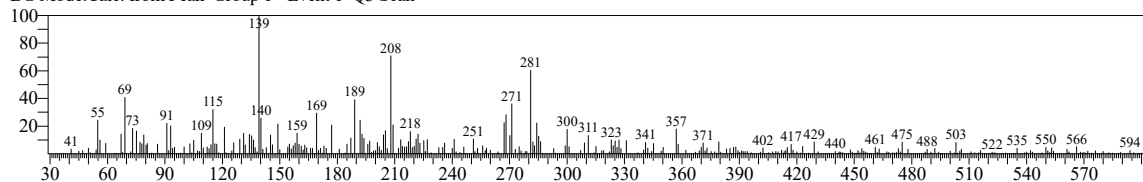

Hit#:1 Entry:258 Library:OA\_TMS\_DB5\_67min\_V3.lib

SI:36 Formula:C14H30O4Si2 CAS:505-48-6 MolWeight:318 RetIndex:1700

CompName:Suberic acid-2TMS ; octanedioic acid

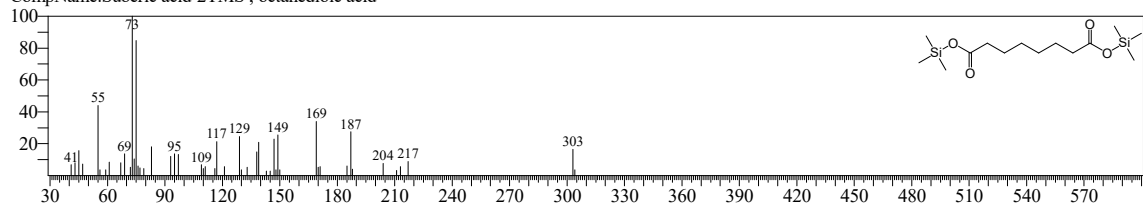

Hit#:2 Entry:534 Library:OA\_TMS\_DB5\_67min\_V3.lib

SI:32 Formula:C25H42O2Si CAS:24880-45-3 MolWeight:402 RetIndex:2591

CompName:Docosapentaenoic acid-TMS ; (7Z,10Z,13Z,16Z,19Z)-docosa-7,10,13,16,19-pentaenoic acid

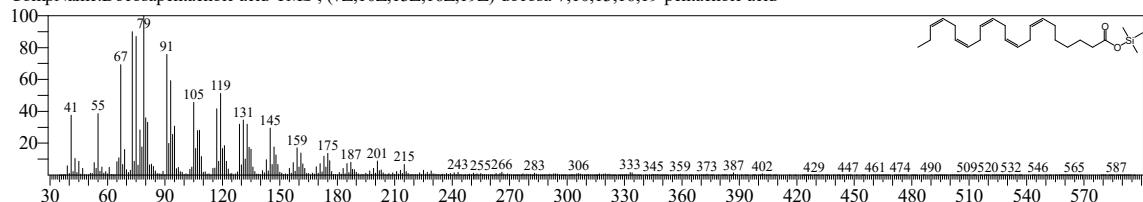

Hit#:3 Entry:328 Library:OA\_TMS\_DB5\_67min\_V3.lib

SI:32 Formula:C13H23NO2Si2 CAS:150-13-0 MolWeight:281 RetIndex:1845

CompName:4-Aminobenzoic acid-2TMS ; 4-aminobenzoic acid

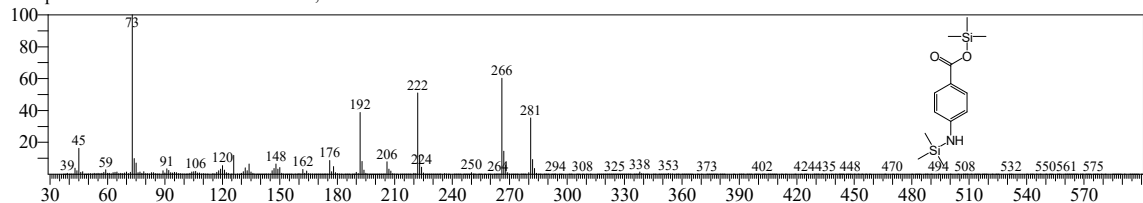

Hit#:4 Entry:497 Library:OA\_TMS\_DB5\_67min\_V3.lib

SI:32 Formula:C16H33NO5Si2 CAS:60317-54-6 MolWeight:375 RetIndex:2271

CompName:Suberylglycine-2TMS ; 8-(carboxymethylamino)-8-oxooctanoic acid

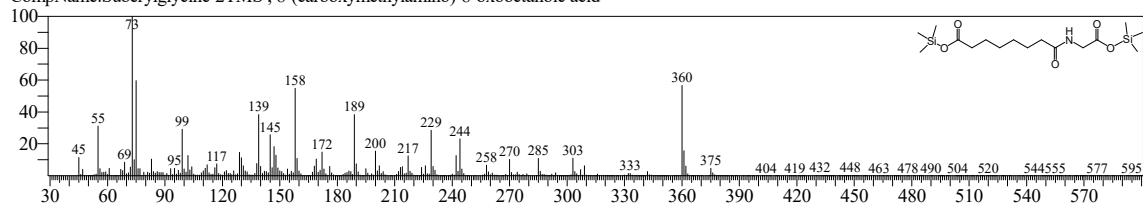

Hit#:5 Entry:511 Library:OA\_TMS\_DB5\_67min\_V3.lib

SI:31 Formula:C22H48O3Si2 CAS:506-13-8 MolWeight:416 RetIndex:2396

CompName:Juniperic acid-2TMS ; 16-hydroxyhexadecanoic acid

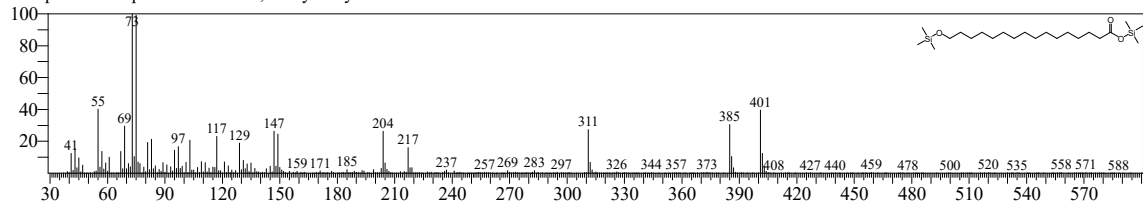

# TNAU

<< Target >>

Line#:7 R.Time:32.015(Scan#:5504) MassPeaks:304

RawMode:Averaged 32.010-32.020(5503-5505) BasePeak:283.00(580)

BG Mode:Calc. from Peak Group 1 - Event 1 Q3 Scan

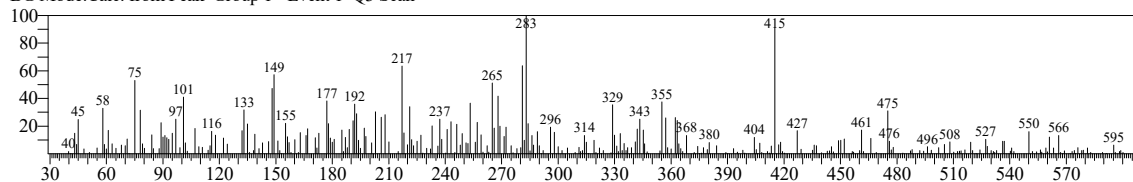

Hit#:1 Entry:203 Library:OA\_TMS\_DB5\_67min\_V3.lib

SI:25 Formula:C13H23NO2Si2 CAS:118-92-3 MolWeight:281 RetIndex:1623

CompName:Anthranilic acid-2TMS ; 2-aminobenzoic acid

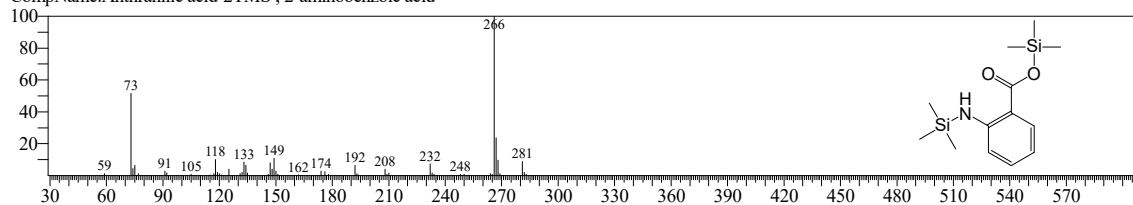

Hit#:2 Entry:402 Library:OA\_TMS\_DB5\_67min\_V3.lib

SI:25 Formula:C20H42O4Si4 CAS:775-01-9 MolWeight:458 RetIndex:1942

CompName:3,4-Dihydroxymandelic acid-4TMS ; 2-(3,4-dihydroxyphenyl)-2-hydroxyacetic acid

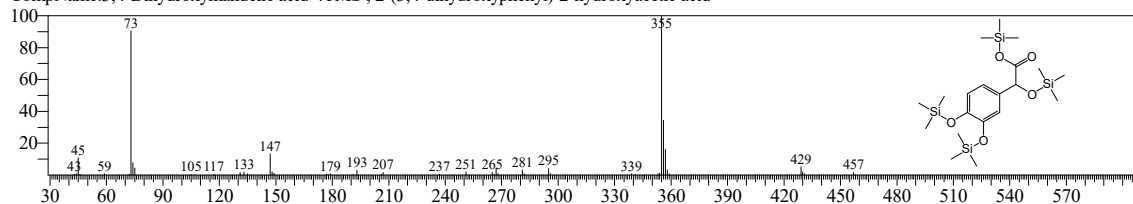

Hit#:3 Entry:313 Library:OA\_TMS\_DB5\_67min\_V3.lib

SI:24 Formula: CAS:0-00-0 MolWeight:427 RetIndex:1831

CompName:Ornithine-d7-4TMS ;

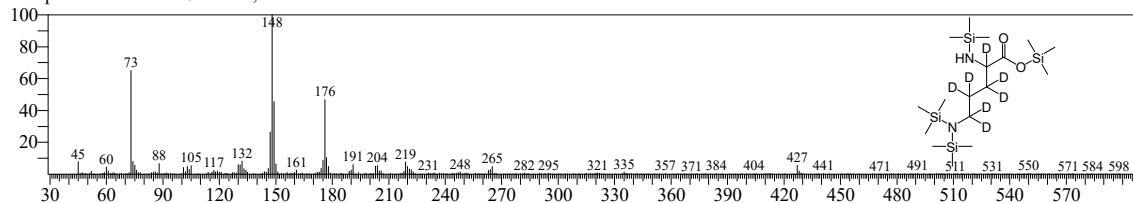

Hit#:4 Entry:277 Library:OA\_TMS\_DB5\_67min\_V3.lib

SI:22 Formula:C12H31NO5Si3 CAS:498-40-8 MolWeight:385 RetIndex:1749

CompName:Cysteic acid-3TMS ; (2R)-2-amino-3-sulfo-3-propanoic acid

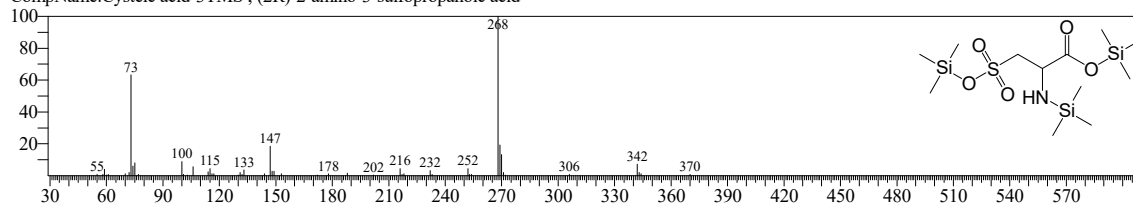

Hit#:5 Entry:227 Library:OA\_TMS\_DB5\_67min\_V3.lib

SI:22 Formula:C17H42O5Si4 CAS:50-69-1 MolWeight:438 RetIndex:1657

CompName:Ribose-4TMS(1) ; (3R,4S,5R)-5-(hydroxymethyl)oxolane-2,3,4-triol

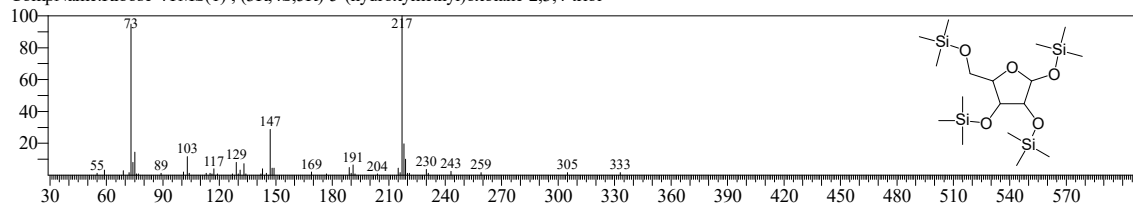



# TNAU

<< Target >>

Line#:8 R.Time:32.620(Scan#:5625) MassPeaks:299

RawMode:Averaged 32.615-32.625(5624-5626) BasePeak:207.05(4195)

BG Mode:Calc. from Peak Group 1 - Event 1 Q3 Scan

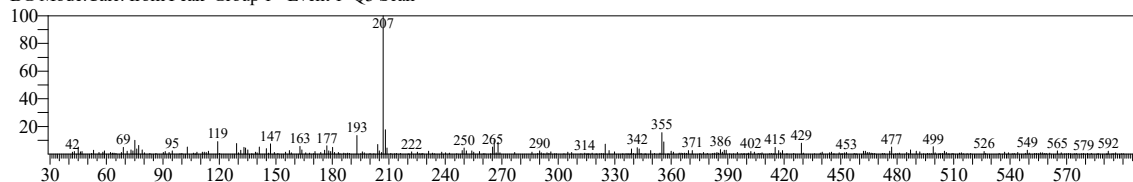

Hit#:1 Entry:402 Library:OA TMS DB5 67min V3.lib

SI:44 Formula:C<sub>20</sub>H<sub>42</sub>O<sub>4</sub>Si<sub>4</sub> CAS:775-01-9 MolWeight:458 RetIndex:1942

CompName:3,4-Dihydroxymandelic acid-4TMS ; 2-(3,4-dihydroxyphenyl)-2-hydroxyacetic acid

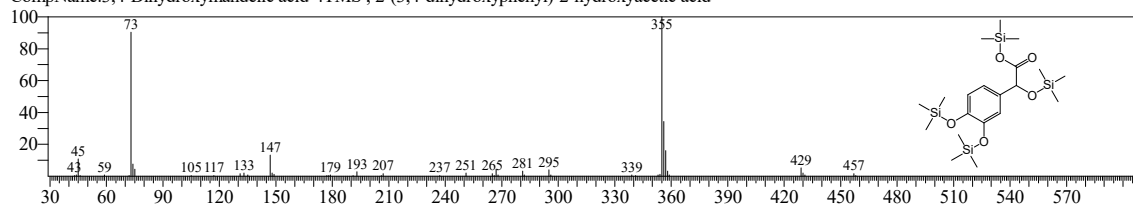

Hit#:2 Entry:343 Library:OA TMS DB5 67min V3.lib

SI:42 Formula:C<sub>18</sub>H<sub>37</sub>NO<sub>3</sub>Si<sub>3</sub> CAS:51-43-4 MolWeight:399 RetIndex:1868

CompName:Epinephrine-3TMS ; 4-[(1R)-1-hydroxy-2-(methylamino)ethyl]benzene-1,2-diol

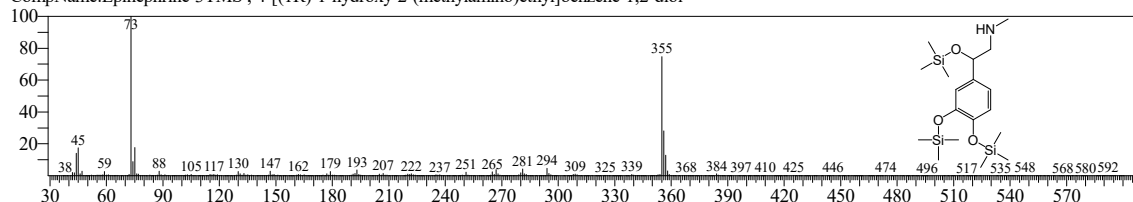

Hit#:3 Entry:332 Library:OA TMS DB5 67min V3.lib

SI:37 Formula:C<sub>17</sub>H<sub>32</sub>O<sub>4</sub>Si<sub>3</sub> CAS:451-13-8 MolWeight:384 RetIndex:1850

CompName:Homogentisic acid-3TMS ; 2-(2,5-dihydroxyphenyl)acetic acid

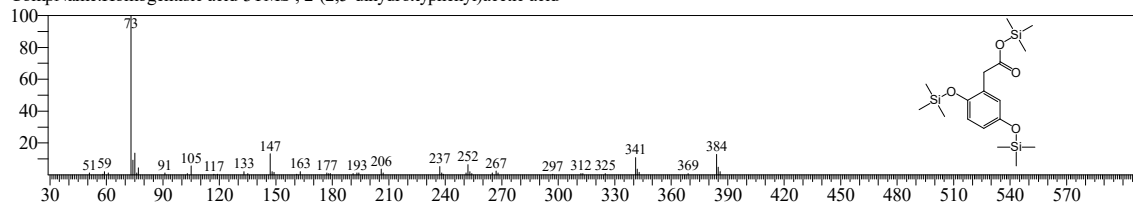

Hit#:4 Entry:315 Library:OA TMS DB5 67min V3.lib

SI:36 Formula:C<sub>16</sub>H<sub>30</sub>O<sub>4</sub>Si<sub>3</sub> CAS:99-50-3 MolWeight:370 RetIndex:1833

CompName:Protocatechuic acid-3TMS ; 3,4-dihydroxybenzoic acid

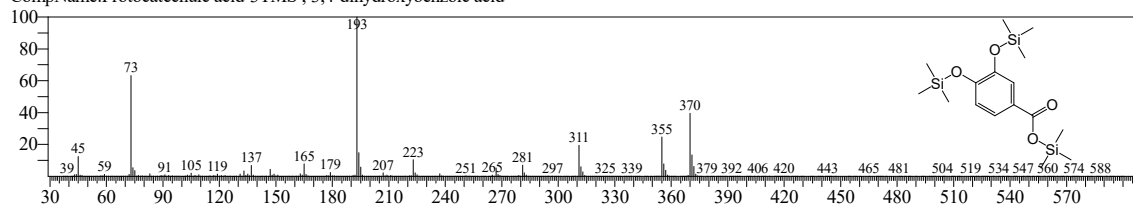

Hit#:5 Entry:267 Library:OA TMS DB5 67min V3.lib

SI:36 Formula:C<sub>17</sub>H<sub>42</sub>O<sub>5</sub>Si<sub>4</sub> CAS:58-86-6 MolWeight:438 RetIndex:1732

CompName:Xylose-4TMS(1) ; (2R,3S,4R)-2,3,4,5-tetrahydroxypentanal

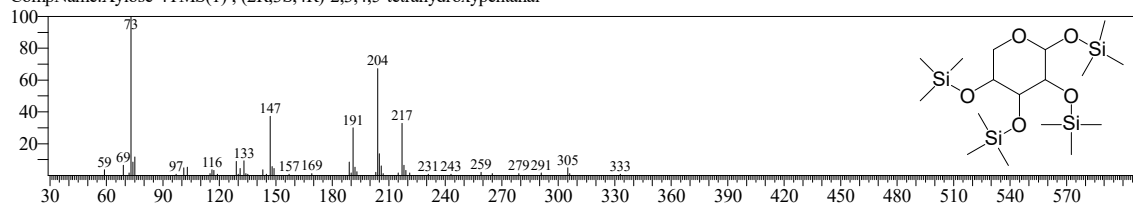

Supplement: Supplementary file 27 [file supplementary]
