# Supplementary material for: Comparative Metabolomics Profiling Reveals Key Metabolites and Associated Pathways Regulating Tuber Dormancy in White Yam (<em>Dioscorea rotundata</em>)
Source: Preprints.org preprint supplement (doi:10.20944/preprints202303.0378.v1), 2023-03-21

# TNAU

## Sample Information

Analyzed by : Admin  
 Analyzed : 02-Sep-22 4:07:39 AM  
 Sample Type : Unknown  
 Level # : 1  
 Sample Name : Sample  
 Sample ID : 4-3  
 IS Amount : [1]=1  
 Sample Amount : 1  
 Dilution Factor : 1  
 Vial # : 5  
 Injection Volume : 2.00  
 Data File : D:\GCMS-8040NX\Sep 2022\Users\01.09.2022\01092022013.qgd  
 Org Data File : D:\GCMS-8040NX\Sep 2022\Users\01.09.2022\01092022013.qgd  
 Method File : D:\GCMS-8040NX\Sep 2022\Method\Scan\_methodfile.qgm  
 Org Method File : D:\GCMS-8040NX\Sep 2022\Method\Scan\_methodfile.qgm  
 Report File :  
 Tuning File : D:\GCMS-8040NX\Aug 2022\Tuning Data\TUNING 25082022.qgt  
 Modified by : Admin  
 Modified : 05-Sep-22 11:00:36 AM

Chromatogram Sample D:\GCMS-8040NX\Sep 2022\Users\01.09.2022\01092022013.qgd

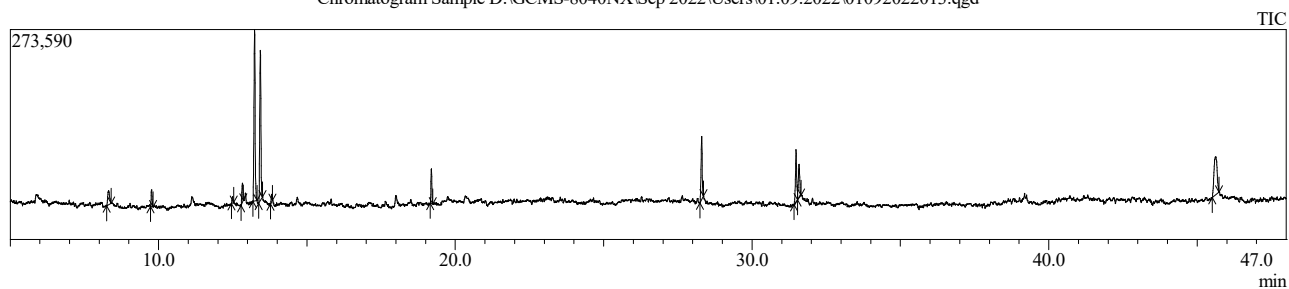

Peak Report TIC

| Peak# | R.Time | Area    | Area%  | Height | Height% | A/H  | Similarity | Name                                    |
|-------|--------|---------|--------|--------|---------|------|------------|-----------------------------------------|
| 1     | 8.320  | 81312   | 3.41   | 18629  | 2.35    | 4.36 | 84         | 1-Butanol, 3-methyl-, acetate           |
| 2     | 9.765  | 50709   | 2.13   | 21901  | 2.77    | 2.32 | 95         | Pentasiloxane, dodecamethyl-            |
| 3     | 12.498 | 20044   | 0.84   | 8358   | 1.06    | 2.40 | 34         | Caffeine                                |
| 4     | 12.825 | 59063   | 2.48   | 25223  | 3.19    | 2.34 | 74         | 1,3-Benzodioxol-5-ol                    |
| 5     | 13.235 | 603496  | 25.31  | 223200 | 28.20   | 2.70 | 54         | Methyl cis-13,16-Docosadienate          |
| 6     | 13.430 | 519887  | 21.81  | 195589 | 24.71   | 2.66 | 54         | Methyl cis-13,16-Docosadienate          |
| 7     | 13.813 | 21923   | 0.92   | 9988   | 1.26    | 2.19 | 82         | Trisiloxane, octamethyl-                |
| 8     | 19.194 | 97970   | 4.11   | 45484  | 5.75    | 2.15 | 94         | 2,4-Di-tert-butylphenoxytrimethylsilane |
| 9     | 28.302 | 217805  | 9.14   | 81641  | 10.32   | 2.67 | 96         | n-Hexadecanoic acid                     |
| 10    | 31.483 | 198792  | 8.34   | 68146  | 8.61    | 2.92 | 95         | 9,12-Octadecadienoic acid (Z,Z)-        |
| 11    | 31.584 | 146122  | 6.13   | 43769  | 5.53    | 3.34 | 89         | 9,12,15-Octadecatrienoic acid, (Z,Z,Z)- |
| 12    | 45.617 | 367089  | 15.40  | 49501  | 6.25    | 7.42 | 88         | Diosgenin                               |
|       |        | 2384212 | 100.00 | 791429 | 100.00  |      |            |                                         |

Library

# TNAU

<< Target >>

Line#:1 R.Time:8.320(Scan#:665) MassPeaks:394  
RawMode:Averaged 8.315-8.325(664-666) BasePeak:43.00(3077)  
BG Mode:Calc. from Peak Group 1 - Event 1 Q3 Scan

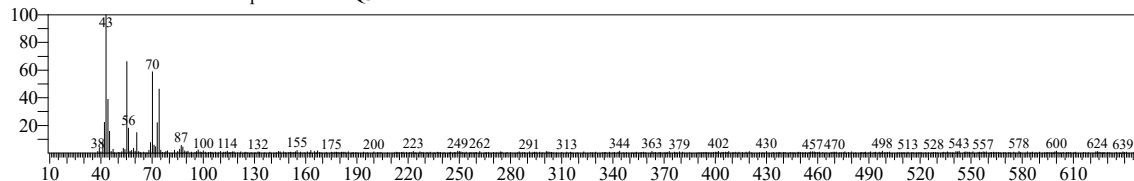

Hit#:1 Entry:6784 Library:NIST20R.lib  
SI:84 Formula:C7H14O2 CAS:123-92-2 MolWeight:130 RetIndex:820  
CompName:1-Butanol, 3-methyl-, acetate \$\$ Isopentyl alcohol, acetate \$\$ Acetic acid, 3-methylbutyl ester \$\$ Banana oil \$\$ Isoamyl acetate \$\$ Isoamyl etha

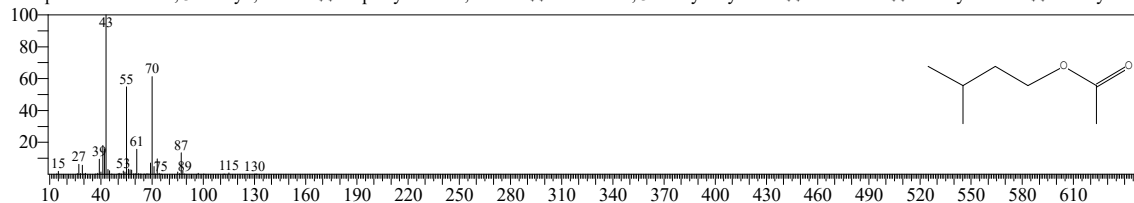

Hit#:2 Entry:8685 Library:NIST20M1.lib  
SI:82 Formula:C7H14O2 CAS:628-63-7 MolWeight:130 RetIndex:884  
CompName:Acetic acid, pentyl ester \$\$ n-Amyl acetate \$\$ n-Pentyl acetate \$\$ Amyl acetate \$\$ Birnenöl \$\$ Pentyl acetate \$\$ Acetic acid, amyl ester \$\$ An

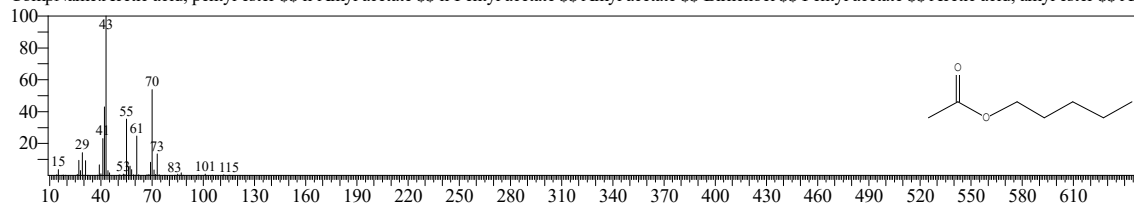

Hit#:3 Entry:6819 Library:NIST20R.lib  
SI:80 Formula:C7H14O2 CAS:624-41-9 MolWeight:130 RetIndex:820  
CompName:1-Butanol, 2-methyl-, acetate \$\$ 2-Methyl-1-butyl acetate \$\$ 2-Methylbutyl acetate \$\$ Acetic acid 2-methylbutyl ester \$\$ 2-Methylbutyl acetate :

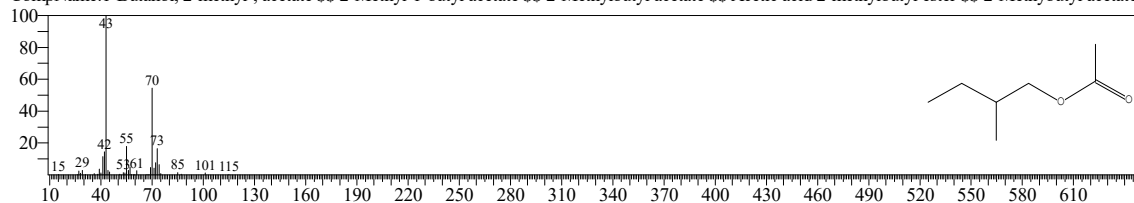

Hit#:4 Entry:32045 Library:NIST20M1.lib  
SI:79 Formula:C6H10N2O4 CAS:0-00-0 MolWeight:174 RetIndex:1774  
CompName:3-(N'-Acetylhydrazinecarbonyl)propanoic acid

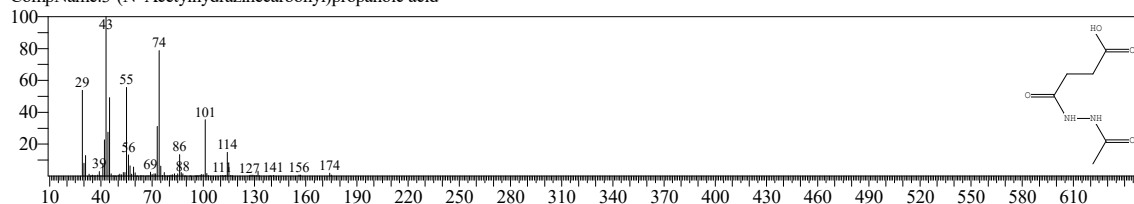

Hit#:5 Entry:5225 Library:NIST20M1.lib  
SI:79 Formula:C4H6O4 CAS:17675-99-9 MolWeight:118 RetIndex:1201  
CompName:2-Furanone, 3,4-dihydroxytetrahydro \$\$ 3,4-Dihydroxydihydro-2(3H)-furanone #

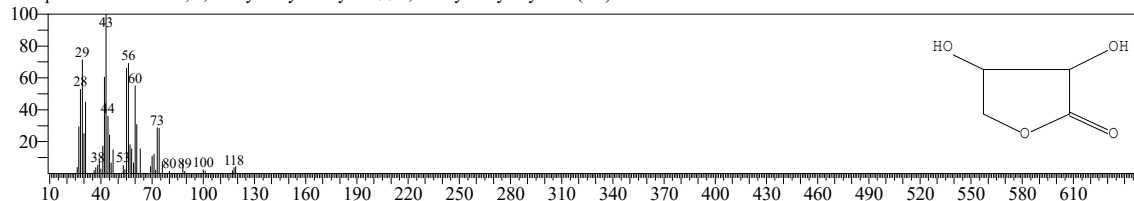

# TNAU

<< Target >>

Line#:2 R.Time:9.765(Scan#:954) MassPeaks:317

RawMode:Averaged 9.760-9.770(953-955) BasePeak:281.05(5747)

BG Mode:Calc. from Peak Group 1 - Event 1 Q3 Scan

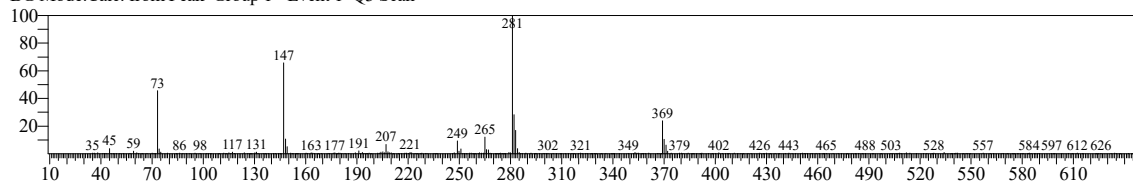

Hit#:1 Entry:40975 Library:NIST20R.lib

SI:95 Formula:C<sub>12</sub>H<sub>36</sub>O<sub>4</sub>Si<sub>5</sub> CAS:141-63-9 MolWeight:384 RetIndex:1068

CompName:Pentasiloxane, dodecamethyl- \$\$ Dodecamethylpentasiloxane \$\$ 1,1,1,3,3,5,5,7,7,9,9-Dodecamethylpentasiloxane #

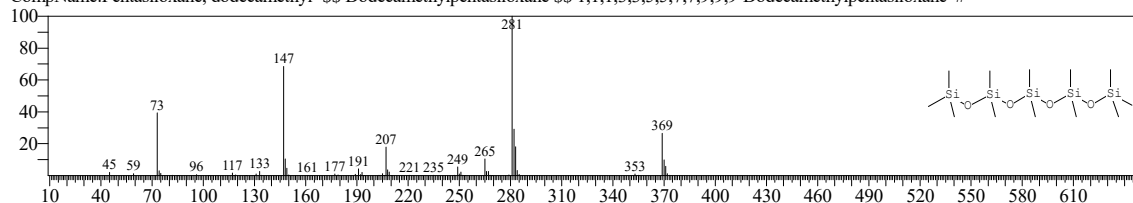

Hit#:2 Entry:249272 Library:NIST20M1.lib

SI:83 Formula:C<sub>12</sub>H<sub>36</sub>O<sub>4</sub>Si<sub>5</sub> CAS:3555-47-3 MolWeight:384 RetIndex:1068

CompName:Trisiloxane, 1,1,1,5,5,5-hexamethyl-3,3-bis[(trimethylsilyl)oxy]- \$\$ Tetrakis(trimethylsiloxy)silane \$\$ Trisiloxane, 1,1,1,5,5,5-hexamethyl-3,3-b

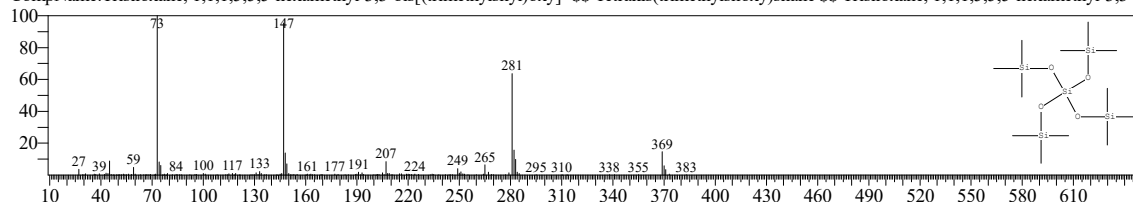

Hit#:3 Entry:27848 Library:NIST20M2.lib

SI:82 Formula:C<sub>18</sub>H<sub>48</sub>O<sub>4</sub>Si<sub>5</sub> CAS:0-00-0 MolWeight:468 RetIndex:1495

CompName:1,3,5,7,9-Pentasiloxane, 1,1,3,3,5,5,7,7,9,9-decamethyl-1,9-di(tert.butyl)-

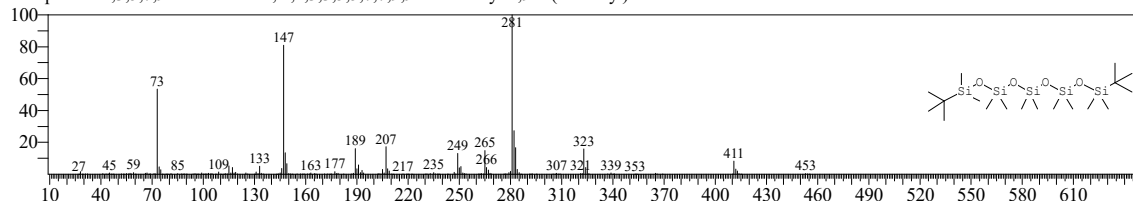

Hit#:4 Entry:249271 Library:NIST20M1.lib

SI:79 Formula:C<sub>12</sub>H<sub>36</sub>O<sub>4</sub>Si<sub>5</sub> CAS:38146-99-5 MolWeight:384 RetIndex:1068

CompName:1,1,1,3,5,5,7,7-Nonamethyl-3-(trimethylsiloxy)tetrasiloxane \$\$ 1,1,1,3,3,5,7,7-Nonamethyl-5-[(trimethylsilyl)oxy]tetrasiloxane #

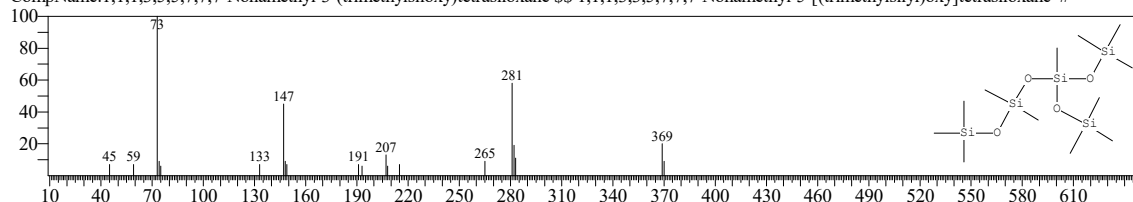

Hit#:5 Entry:158097 Library:NIST20M1.lib

SI:76 Formula:C<sub>14</sub>H<sub>24</sub>O<sub>3</sub>Si<sub>2</sub> CAS:0-00-0 MolWeight:296 RetIndex:1625

CompName:2,6-Dihydroxyacetophenone, 2TMS derivative \$\$ 2',6'-Dihydroxyacetophenone, bis(trimethylsilyl) ether

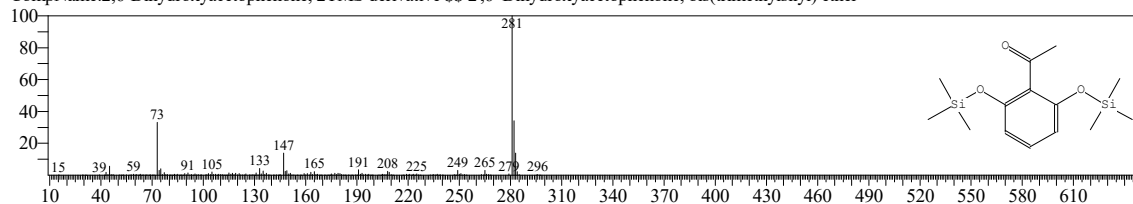

# TNAU

<< Target >>

Line#:3 R.Time:12.500(Scan#:1501) MassPeaks:314

RawMode:Averaged 12.495-12.505(1500-1502) BasePeak:138.05(2855)

BG Mode:Calc. from Peak Group 1 - Event 1 Q3 Scan

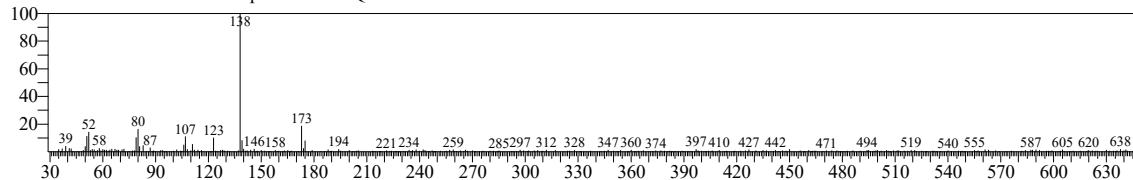

Hit#:1 Entry:342 Library:OA\_TMS\_DB5\_67min\_V3.lib

SI:34 Formula:C<sub>8</sub>H<sub>10</sub>N<sub>4</sub>O<sub>2</sub> CAS:58-08-2 MolWeight:194 RetIndex:1867

CompName:Caffeine ; 1,3,7-trimethylpurine-2,6-dione

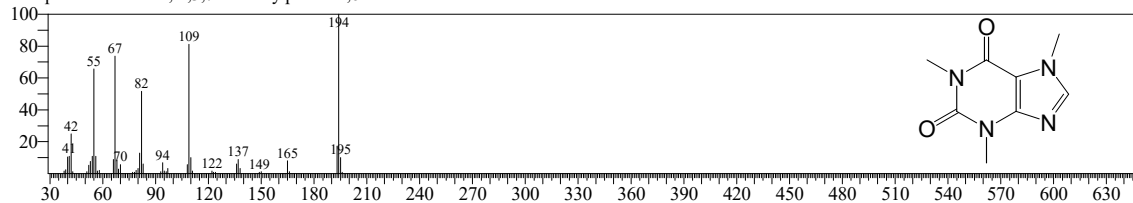

Hit#:2 Entry:21 Library:FA\_ME\_SP2560\_EI\_V3.lib

SI:29 Formula:C<sub>19</sub>H<sub>34</sub>O<sub>2</sub> CAS:60-33-3 MolWeight:294 RetIndex:2775

CompName:Methyl linoleate ; Octadeca-9,12-dienoic acid

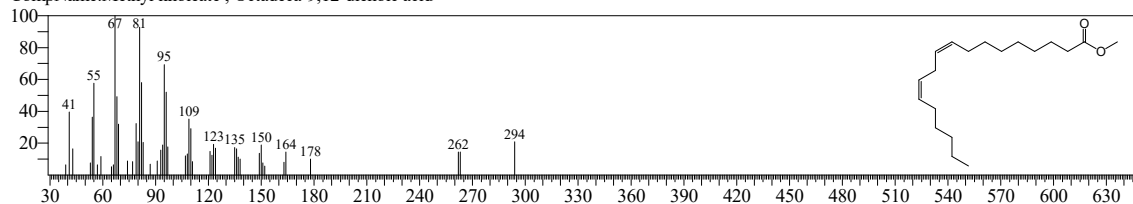

Hit#:3 Entry:34 Library:FA\_ME\_SP2560\_EI\_V3.lib

SI:29 Formula:C<sub>23</sub>H<sub>42</sub>O<sub>2</sub> CAS:7370-49-2 MolWeight:350 RetIndex:3169

CompName:Methyl cis-13,16-Docosadienate ; (13Z,16E)-docosa-13,16-dienoic acid

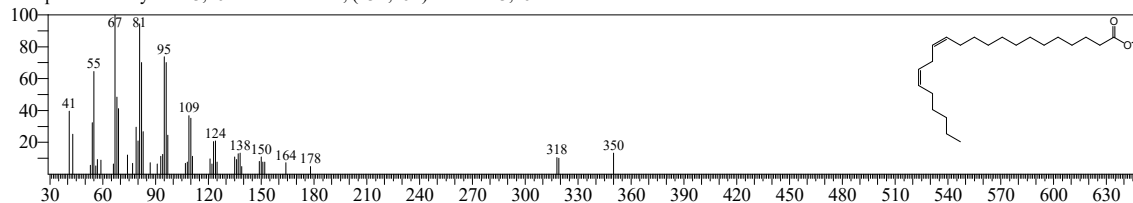

Hit#:4 Entry:20 Library:FA\_ME\_SP2560\_EI\_V3.lib

SI:29 Formula:C<sub>19</sub>H<sub>34</sub>O<sub>2</sub> CAS:506-21-8 MolWeight:294 RetIndex:2727

CompName:Methyl linolelaidate ; (9E,12E)-octadeca-9,12-dienoic acid

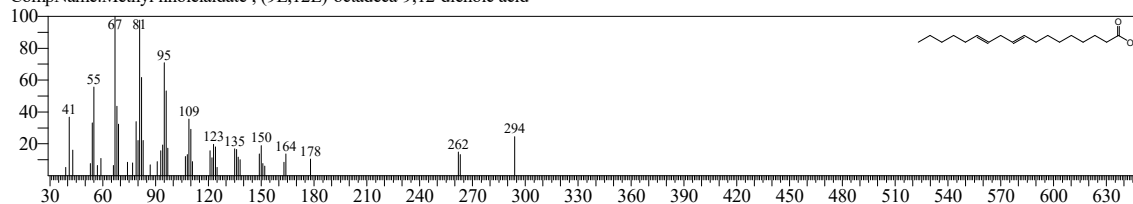

Hit#:5 Entry:25 Library:FA\_ME\_SP2560\_EI\_V3.lib

SI:28 Formula:C<sub>19</sub>H<sub>32</sub>O<sub>2</sub> CAS:463-40-1 MolWeight:292 RetIndex:2892

CompName:Methyl linolenate ; (9Z,12Z,15Z)-octadeca-9,12,15-trienoic acid

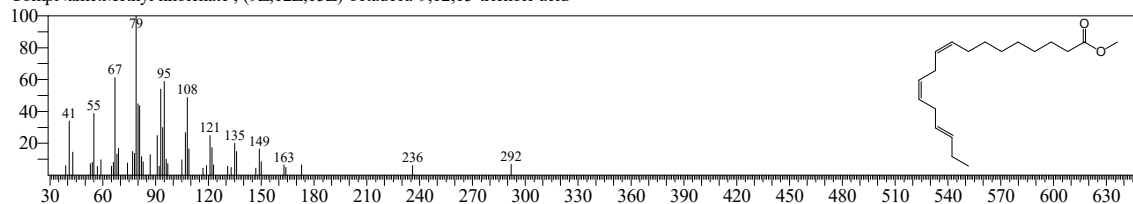

# TNAU

<< Target >>

Line#:4 R.Time:12.825(Scan#:1566) MassPeaks:379

RawMode:Averaged 12.820-12.830(1565-1567) BasePeak:138.05(8023)

BG Mode:Calc. from Peak Group 1 - Event 1 Q3 Scan

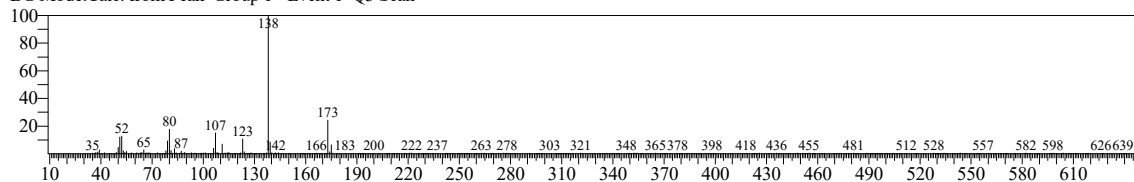

Hit#:1 Entry:11187 Library:NIST20M1.lib

SI:74 Formula:C7H6O3 CAS:533-31-3 MolWeight:138 RetIndex:1245

CompName:1,3-Benzodioxol-5-ol \$\$ Phenol, 3,4-(methylenedioxy)- \$\$ Sesamol \$\$ 3,4-(Methylenedioxy)phenol \$\$ 5-Hydroxy-1,3-benzodioxole \$\$ Methy

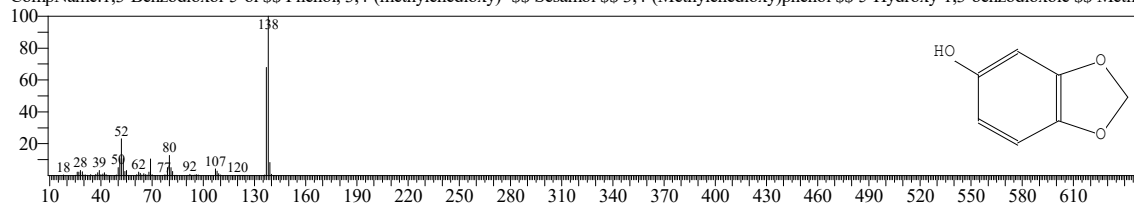

Hit#:2 Entry:11188 Library:NIST20M1.lib

SI:72 Formula:C7H6O3 CAS:69393-72-2 MolWeight:138 RetIndex:1245

CompName:2,3-Methylenedioxyphenol \$\$ 1,3-Benzodioxol-4-ol #

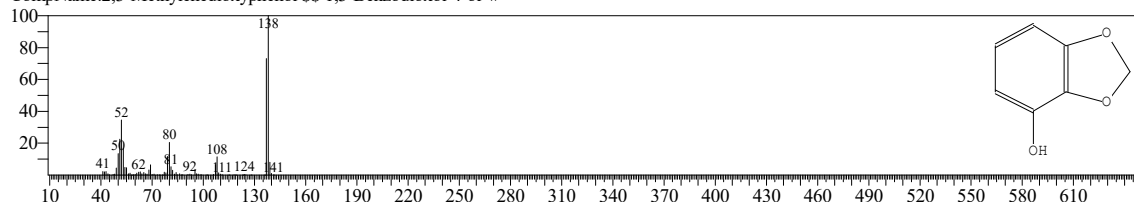

Hit#:3 Entry:8360 Library:NIST20R.lib

SI:71 Formula:C6H6N2O2 CAS:105-11-3 MolWeight:138 RetIndex:1349

CompName:2,5-Cyclohexadiene-1,4-dione, dioxime \$\$ p-Benzoquinone, dioxime \$\$ p-Quinone dioxime \$\$ p-Quinone oxime \$\$ Benzoquinone dioxime \$\$

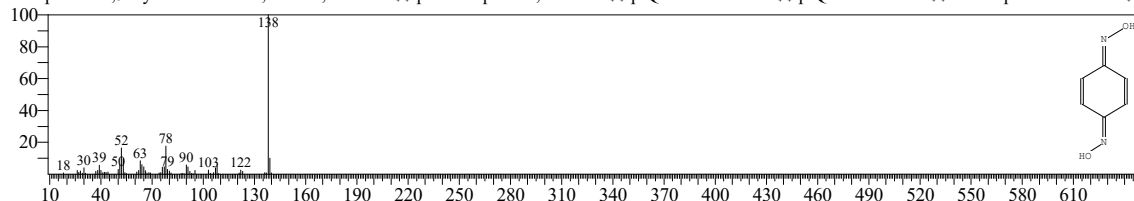

Hit#:4 Entry:21 Library:FA\_ME\_SP2560\_EI\_V3.lib

SI:34 Formula:C19H34O2 CAS:60-33-3 MolWeight:294 RetIndex:2775

CompName:Methyl linoleate ; Octadeca-9,12-dienoic acid

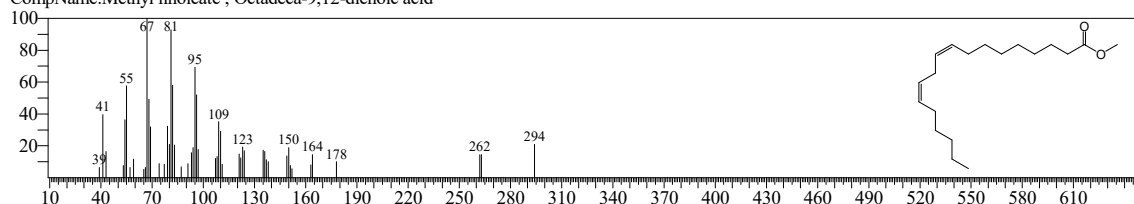

Hit#:5 Entry:34 Library:FA\_ME\_SP2560\_EI\_V3.lib

SI:34 Formula:C23H42O2 CAS:7370-49-2 MolWeight:350 RetIndex:3169

CompName:Methyl cis-13,16-Docosadienate ; (13Z,16E)-docosa-13,16-dienoic acid

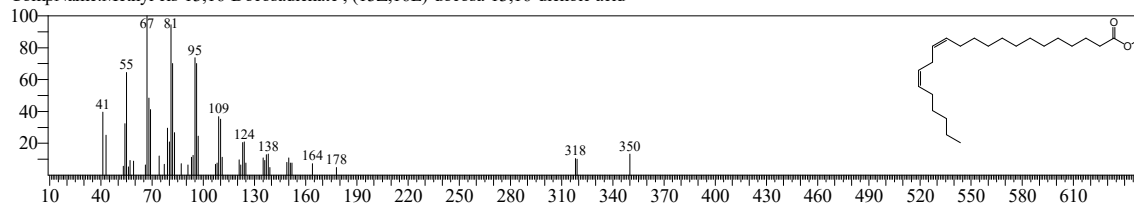

# TNAU

<< Target >>

Line#:5 R.Time:13.235(Scan#:1648) MassPeaks:259

RawMode:Averaged 13.230-13.240(1647-1649) BasePeak:155.05(36250)

BG Mode:Calc. from Peak Group 1 - Event 1 Q3 Scan

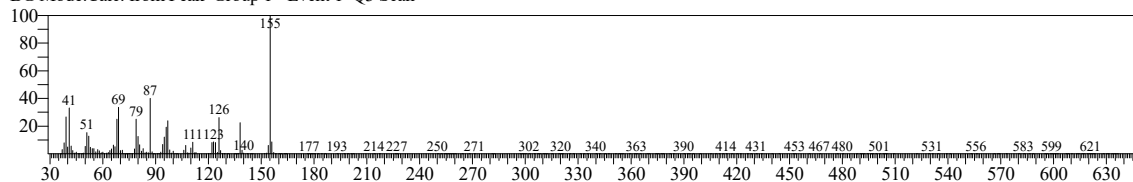

Hit#:1 Entry:34 Library:FA\_ME\_SP2560\_EI\_V3.lib

SI:54 Formula:C23H42O2 CAS:7370-49-2 MolWeight:350 RetIndex:3169

CompName:Methyl cis-13,16-Docosadienate ; (13Z,16E)-docosa-13,16-dienoic acid

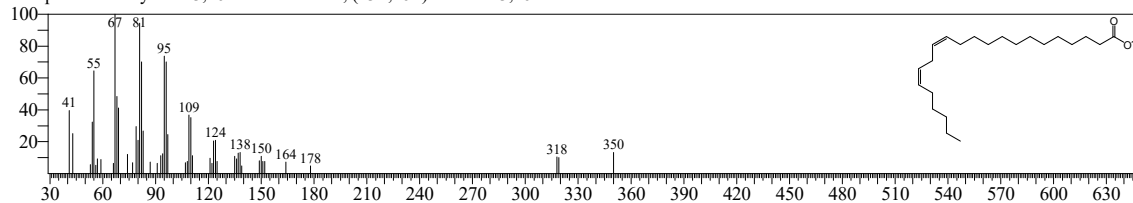

Hit#:2 Entry:21 Library:FA\_ME\_SP2560\_EI\_V3.lib

SI:52 Formula:C19H34O2 CAS:60-33-3 MolWeight:294 RetIndex:2775

CompName:Methyl linoleate ; Octadeca-9,12-dienoic acid

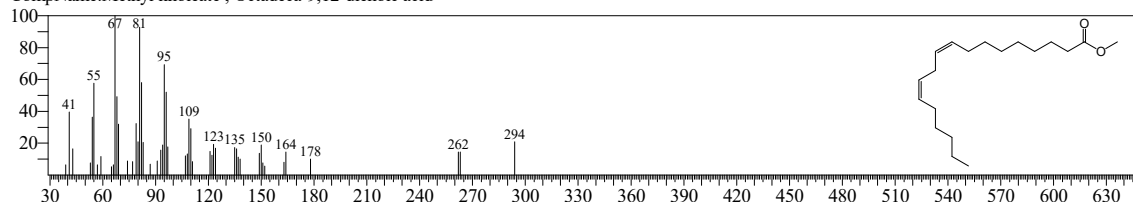

Hit#:3 Entry:20 Library:FA\_ME\_SP2560\_EI\_V3.lib

SI:52 Formula:C19H34O2 CAS:506-21-8 MolWeight:294 RetIndex:2727

CompName:Methyl linolelaidate ; (9E,12E)-octadeca-9,12-dienoic acid

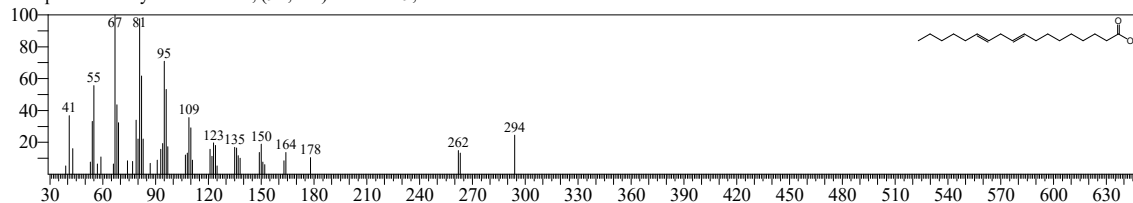

Hit#:4 Entry:27 Library:FA\_ME\_SP2560\_EI\_V3.lib

SI:52 Formula:C21H38O2 CAS:2091-39-6 MolWeight:322 RetIndex:2973

CompName:Methyl cis-11,14-Icosadienoate ; Icosa-11,14-dienoic acid

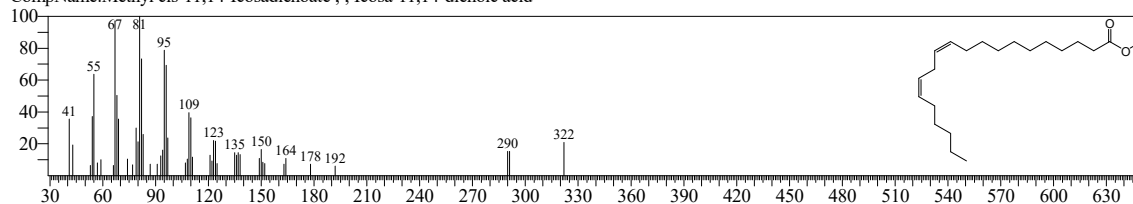

Hit#:5 Entry:11 Library:FA\_ME\_SP2560\_EI\_V3.lib

SI:52 Formula:C16H30O2 CAS:84743-29-3 MolWeight:254 RetIndex:2388

CompName:Methyl cis-10-pentadecenoate ; (Z)-pentadec-10-enoic acid

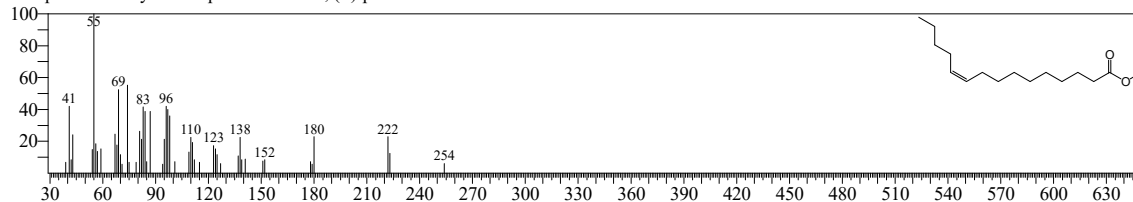

# TNAU

<< Target >>

Line#:6 R.Time:13.430(Scan#:1687) MassPeaks:408

RawMode:Averaged 13.425-13.435(1686-1688) BasePeak:155.05(31173)

BG Mode:Calc. from Peak Group 1 - Event 1 Q3 Scan

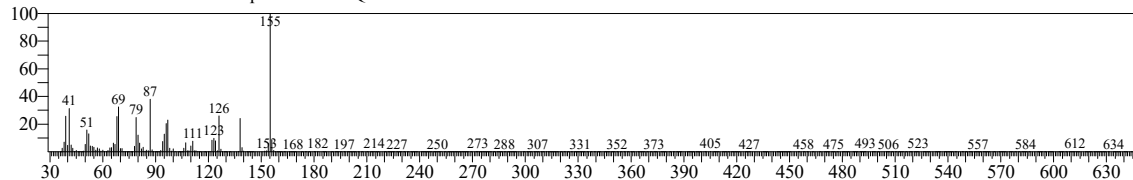

Hit#:1 Entry:34 Library:FA\_ME\_SP2560\_EI\_V3.lib

SI:54 Formula:C23H42O2 CAS:7370-49-2 MolWeight:350 RetIndex:3169

CompName:Methyl cis-13,16-Docosadienate ; (13Z,16E)-docosa-13,16-dienoic acid

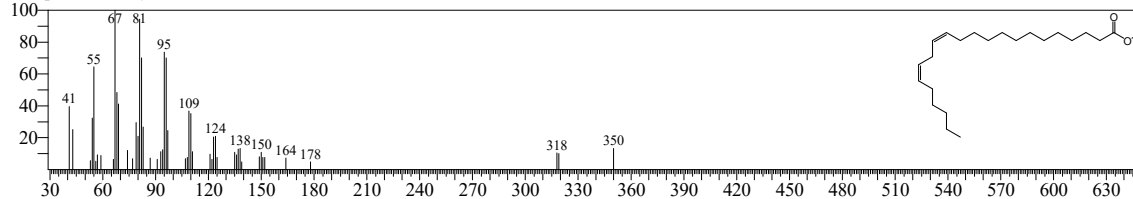

Hit#:2 Entry:21 Library:FA\_ME\_SP2560\_EI\_V3.lib

SI:52 Formula:C19H34O2 CAS:60-33-3 MolWeight:294 RetIndex:2775

CompName:Methyl linoleate ; Octadeca-9,12-dienoic acid



Hit#:3 Entry:20 Library:FA\_ME\_SP2560\_EI\_V3.lib

SI:52 Formula:C19H34O2 CAS:506-21-8 MolWeight:294 RetIndex:2727

CompName:Methyl linolelaidate ; (9E,12E)-octadeca-9,12-dienoic acid

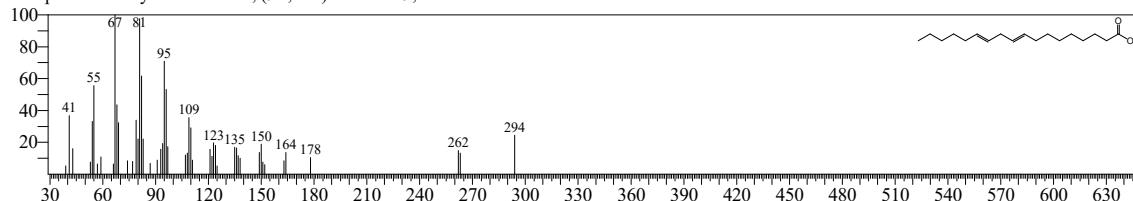

Hit#:4 Entry:27 Library:FA\_ME\_SP2560\_EI\_V3.lib

SI:52 Formula:C21H38O2 CAS:2091-39-6 MolWeight:322 RetIndex:2973

CompName:Methyl cis-11,14-Icosadienoate ; Icosa-11,14-dienoic acid

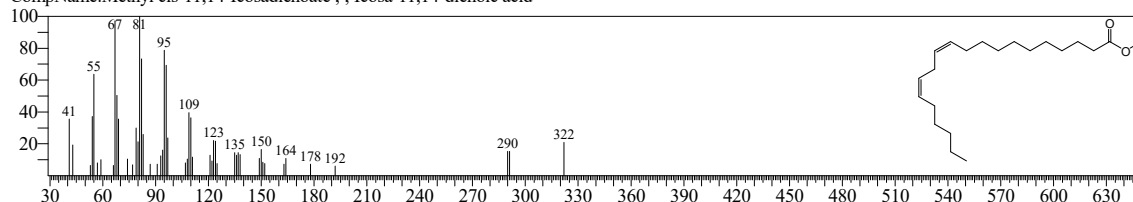

Hit#:5 Entry:11 Library:FA\_ME\_SP2560\_EI\_V3.lib

SI:51 Formula:C16H30O2 CAS:84743-29-3 MolWeight:254 RetIndex:2388

CompName:Methyl cis-10-pentadecenoate ; (Z)-pentadec-10-enoic acid

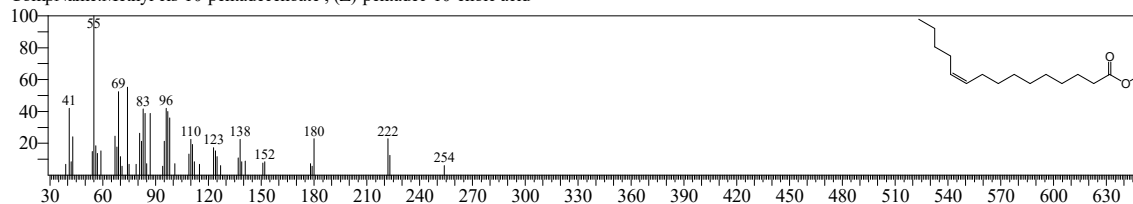

# TNAU

<< Target >>

Line#:7 R.Time:13.815(Scan#:1764) MassPeaks:301

RawMode:Averaged 13.810-13.820(1763-1765) BasePeak:221.10(3613)

BG Mode:Calc. from Peak Group 1 - Event 1 Q3 Scan

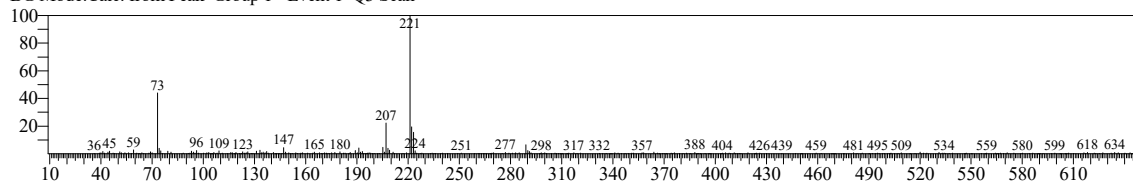

Hit#:1 Entry:28950 Library:NIST20R.lib

SI:82 Formula:C8H24O2Si3 CAS:107-51-7 MolWeight:236 RetIndex:698

CompName:Trisiloxane, octamethyl- \$\$ Octamethyltrisiloxane \$\$ Silane, dimethylbis(trimethylsiloxy)- \$\$(CH3)3

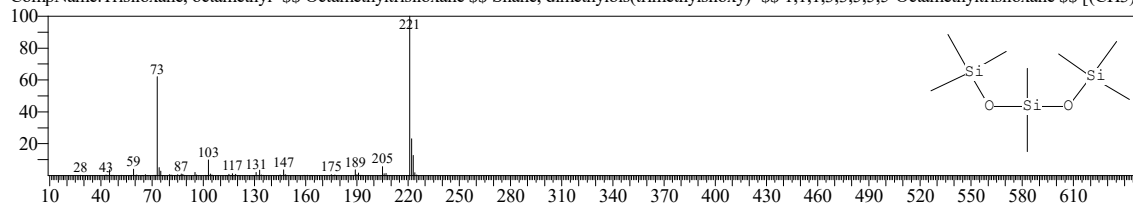

Hit#:2 Entry:33791 Library:NIST20R.lib

SI:77 Formula:C9H27BO3Si3 CAS:4325-85-3 MolWeight:278 RetIndex:0

CompName:Boric acid, 3TMS derivative \$\$ Tris(trimethylsilyl)borate \$\$ Silanol, trimethyl-, triester with boric acid (H3BO3) \$\$ Borane, tris(trimethylsiloxy)

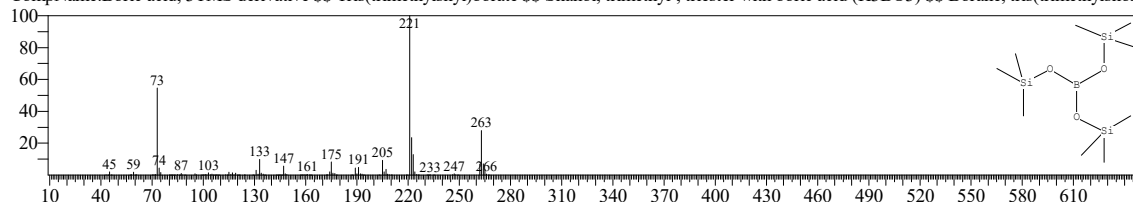

Hit#:3 Entry:186590 Library:NIST20M1.lib

SI:76 Formula:C14H36O2Si3 CAS:0-00-0 MolWeight:320 RetIndex:1126

CompName:1,3,5-Trisiloxane, 1,1,3,3,5,5-hexamethyl-1,5-di(tert.butyl)-

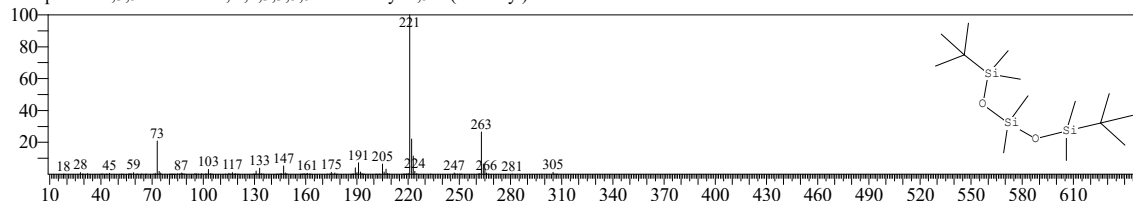

Hit#:4 Entry:186586 Library:NIST20M1.lib

SI:75 Formula:C14H32O2SSi2 CAS:82112-29-6 MolWeight:320 RetIndex:1482

CompName:Thioglycolic acid, S-(tert-butyl)dimethylsilyl-, tert-butyl)dimethylsilyl ester

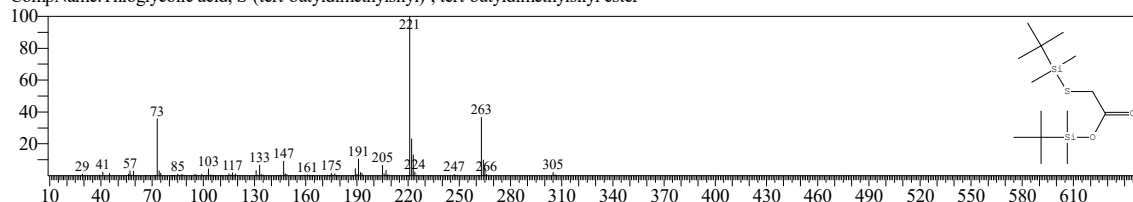

Hit#:5 Entry:136873 Library:NIST20M1.lib

SI:73 Formula:C14H22N2SSi CAS:0-00-0 MolWeight:278 RetIndex:1942

CompName:2-Mercapto-4,6-dimethylnicotinonitrile, TBDMS derivative \$\$ 4,6-Dimethyl-2-thioxo-1,2-dihydro-3-pyridinecarbonitrile tbdms \$\$ Cl-4441 tbd

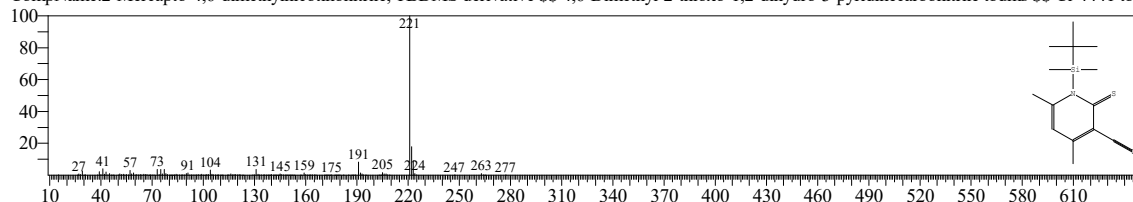



# TNAU

<< Target >>

Line# 8 R.Time: 19.195 (Scan#: 2840) MassPeaks: 359

RawMode: Averaged 19.190-19.200 (2839-2841) BasePeak: 263.15 (18550)

BG Mode: Calc. from Peak Group 1 - Event 1 Q3 Scan

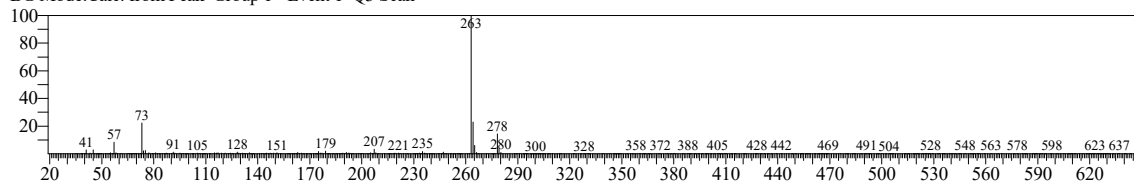

Hit#: 1 Entry: 33874 Library: NIST20R.lib

SI: 94 Formula: C<sub>17</sub>H<sub>30</sub>OSi CAS: 53925-65-8 MolWeight: 278 RetIndex: 1632

CompName: 2,4-Di-tert-butylphenoxytrimethylsilane \$\$\$\$ Benzene, 2,4-bis(1,1-dimethylethyl)-1-[(trimethylsilyl)oxy]- \$\$\$\$ Silane, [2,4-bis(1,1-dimethylethyl)ph

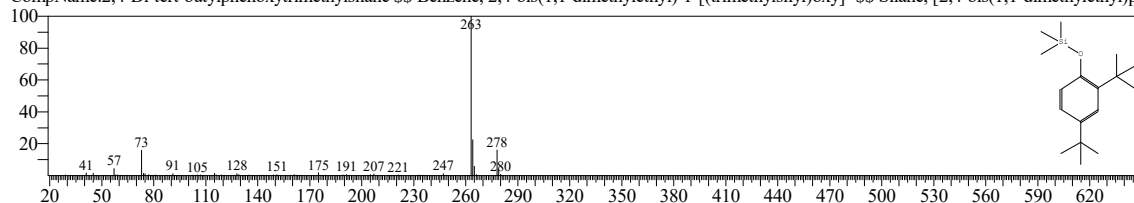

Hit#: 2 Entry: 33871 Library: NIST20R.lib

SI: 86 Formula: C<sub>17</sub>H<sub>30</sub>OSi CAS: 10416-73-6 MolWeight: 278 RetIndex: 1632

CompName: 2,6-Bis(tert-butyl)phenol, TMS derivative \$\$\$\$ Trimethyl(2,6 di-tert-butylphenoxy)silane \$\$\$\$ (2,6-Di-tert-butylphenoxy)(trimethyl)silane #

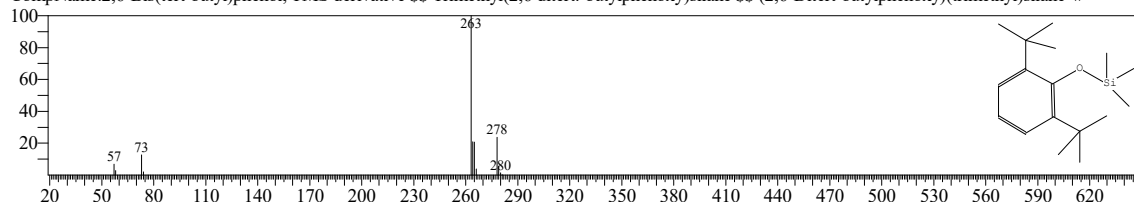

Hit#: 3 Entry: 136557 Library: NIST20M1.lib

SI: 84 Formula: C<sub>12</sub>H<sub>22</sub>N<sub>4</sub>Si<sub>2</sub> CAS: 0-00-0 MolWeight: 278 RetIndex: 1703

CompName: 3-Deazaadenine, 2TMS \$\$\$\$ 3-Deazaadenine, N,N'-bis-TMS \$\$\$\$ 1H-Imidazo[4,5-c]pyridin-4-amine, N,N'-bis-TMS

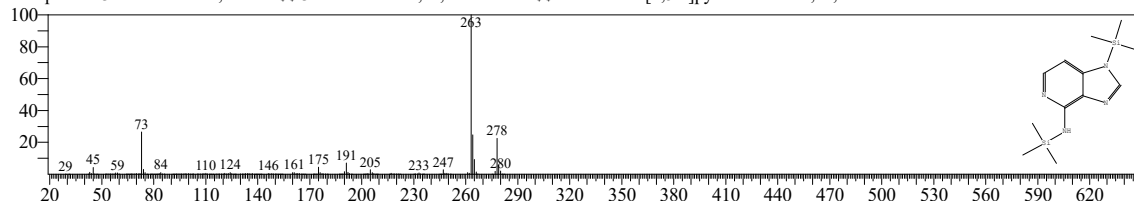

Hit#: 4 Entry: 259338 Library: NIST20M1.lib

SI: 82 Formula: C<sub>23</sub>H<sub>30</sub>O<sub>4</sub>Si CAS: 0-00-0 MolWeight: 398 RetIndex: 2735

CompName: 2-[1-(1,3-benzodioxol-5-yl)propan-2-yl]-6-methoxy-4-prop-2-enylphenol, TMS derivative \$\$\$\$ 2-[1-(1,3-Benzodioxol-5-yl)propan-2-yl]-6-metho

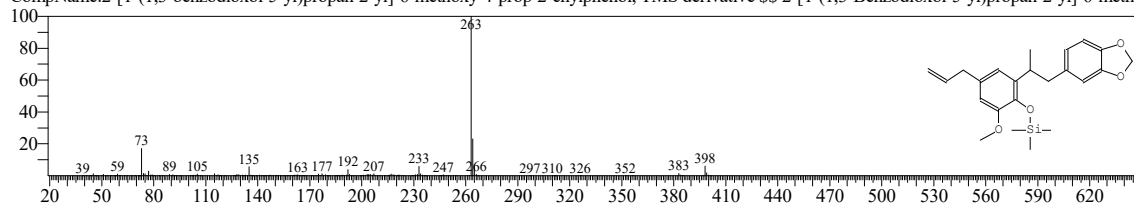

Hit#: 5 Entry: 136556 Library: NIST20M1.lib

SI: 81 Formula: C<sub>12</sub>H<sub>22</sub>N<sub>4</sub>Si<sub>2</sub> CAS: 0-00-0 MolWeight: 278 RetIndex: 1606

CompName: 1H,1'H-2,2'-Biimidazole, 2TMS \$\$\$\$ 1H,1'H-2,2'-Biimidazole, N,N'-bis-TMS \$\$\$\$ 1H-[2,2']Biimidazolyl, 2TMS \$\$\$\$ 2,2'-Bi-1H-imidazole, 2TMS

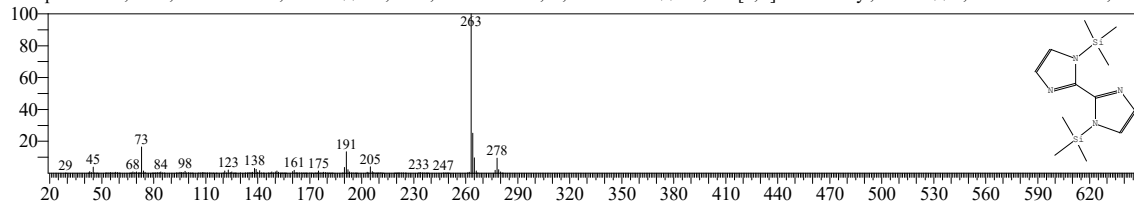

# TNAU

<< Target >>

Line#9 R.Time:28.300(Scan#:4661) MassPeaks:332

RawMode:Averaged 28.295-28.305(4660-4662) BasePeak:73.05(6914)

BG Mode:Calc. from Peak Group 1 - Event 1 Q3 Scan

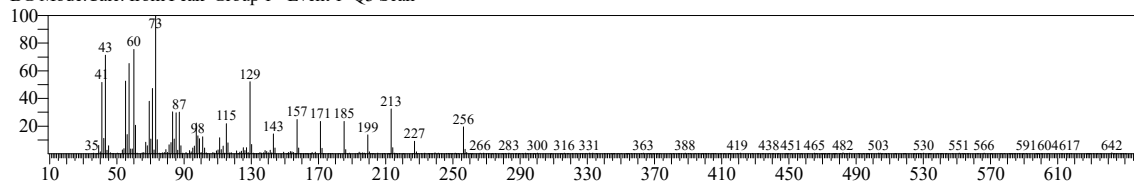

Hit#:1 Entry:31600 Library:NIST20R.lib

SI:96 Formula:C16H32O2 CAS:57-10-3 MolWeight:256 RetIndex:1968

CompName:n-Hexadecanoic acid \$ Hexadecanoic acid \$ n-Hexadecic acid \$ Palmitic acid \$ Pentadecanecarboxylic acid \$ 1-Pentadecanecarboxylic

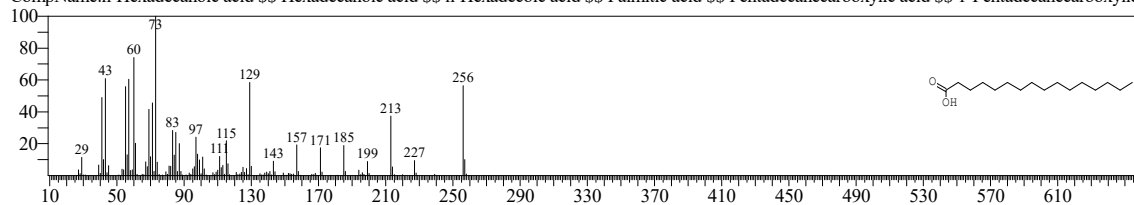

Hit#:2 Entry:29890 Library:NIST20R.lib

SI:91 Formula:C15H30O2 CAS:1002-84-2 MolWeight:242 RetIndex:1869

CompName:Pentadecanoic acid \$ Pentadecylic acid \$ n-Pentadecanoic acid \$ n-Pentadecylic acid

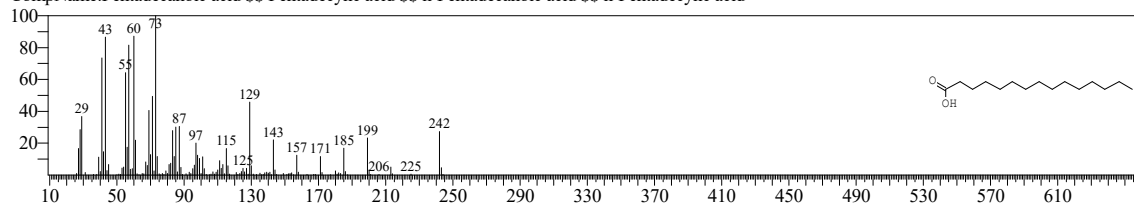

Hit#:3 Entry:44286 Library:NIST20M2.lib

SI:90 Formula:C38H68O8 CAS:28474-90-0 MolWeight:652 RetIndex:4765

CompName:l-(+)-Ascorbic acid 2,6-dihexadecanoate

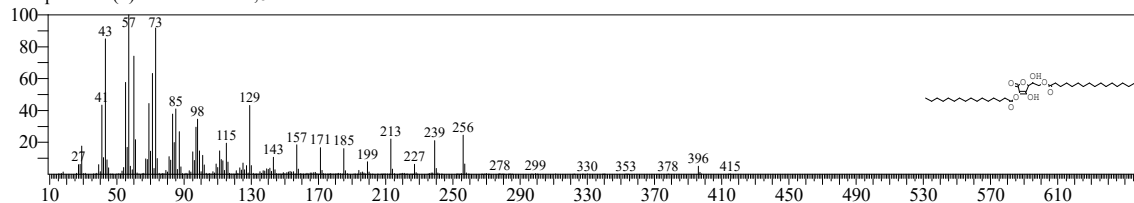

Hit#:4 Entry:25643 Library:NIST20R.lib

SI:90 Formula:C13H26O2 CAS:638-53-9 MolWeight:214 RetIndex:1670

CompName:Tridecanoic acid \$ n-Tridecanoic acid \$ n-Tridecoic acid \$ Tridecylic acid

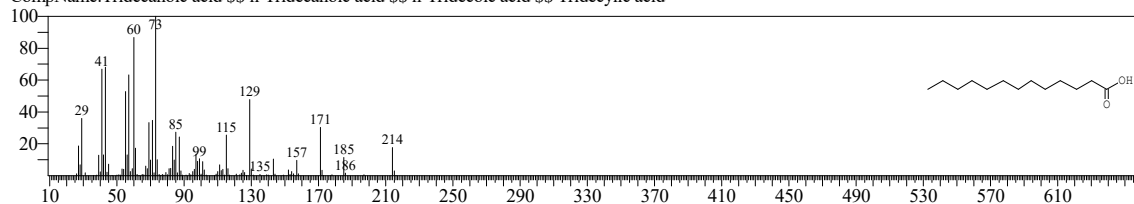

Hit#:5 Entry:144781 Library:NIST20M1.lib

SI:89 Formula:C18H36O2 CAS:57-11-4 MolWeight:284 RetIndex:2167

CompName:Octadecanoic acid \$ Stearic acid \$ n-Octadecanoic acid \$ Humko Industriene R \$ Hydrofol Acid 150 \$ Hystrene S-97 \$ Hystrene T-70 \$

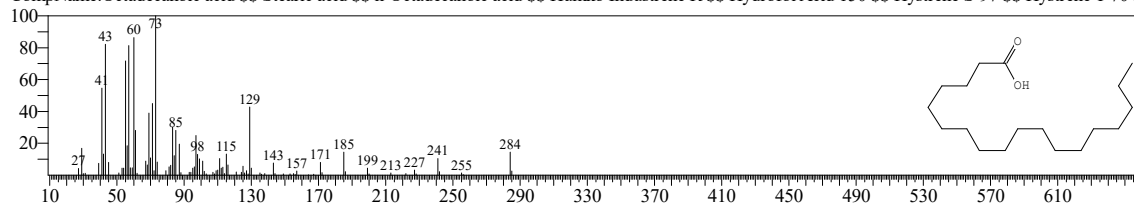

# TNAU

<< Target >>

Line#:10 R.Time:31.485(Scan#:5298) MassPeaks:345

RawMode:Averaged 31.480-31.490(5297-5299) BasePeak:67.10(5793)

BG Mode:Calc. from Peak Group 1 - Event 1 Q3 Scan

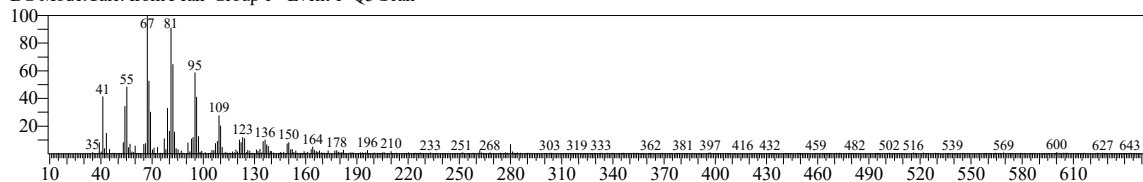

Hit#:1 Entry:34035 Library:NIST20R.lib

SI:95 Formula:C18H32O2 CAS:60-33-3 MolWeight:280 RetIndex:2183

CompName:9,12-Octadecadienoic acid (Z,Z)- \$\$ cis-9,cis-12-Octadecadienoic acid \$\$ cis,cis-Linoleic acid \$\$ Grape seed oil \$\$ Linoleic acid \$

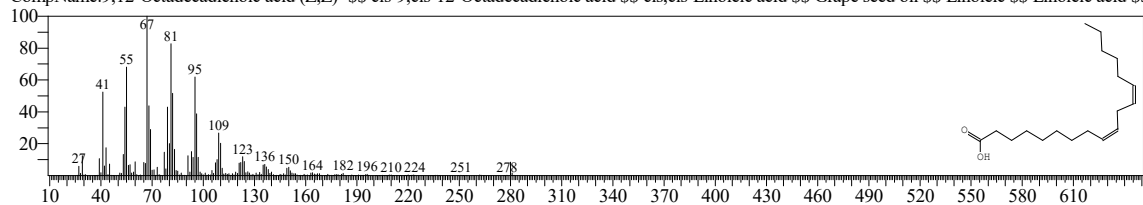

Hit#:2 Entry:139646 Library:NIST20M1.lib

SI:94 Formula:C18H32O2 CAS:2420-56-6 MolWeight:280 RetIndex:2183

CompName:10E,12Z-Octadecadienoic acid

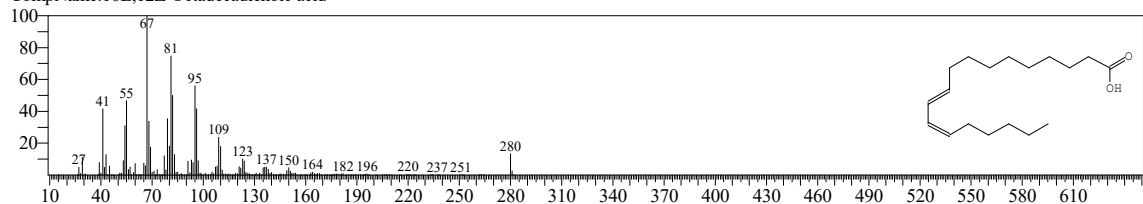

Hit#:3 Entry:139651 Library:NIST20M1.lib

SI:94 Formula:C18H32O2 CAS:544-71-8 MolWeight:280 RetIndex:2183

CompName:(9E,11E)-Octadecadienoic acid

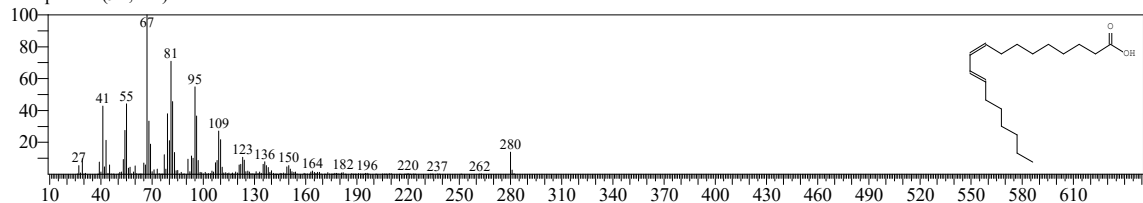

Hit#:4 Entry:173215 Library:NIST20M1.lib

SI:94 Formula:C20H36O2 CAS:2091-39-6 MolWeight:308 RetIndex:2382

CompName:11,14-Eicosadienoic acid

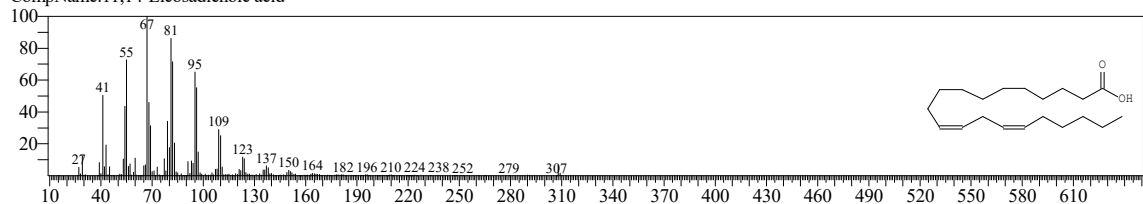

Hit#:5 Entry:139661 Library:NIST20M1.lib

SI:93 Formula:C18H32O2 CAS:506-21-8 MolWeight:280 RetIndex:2183

CompName:Linoelaidic acid

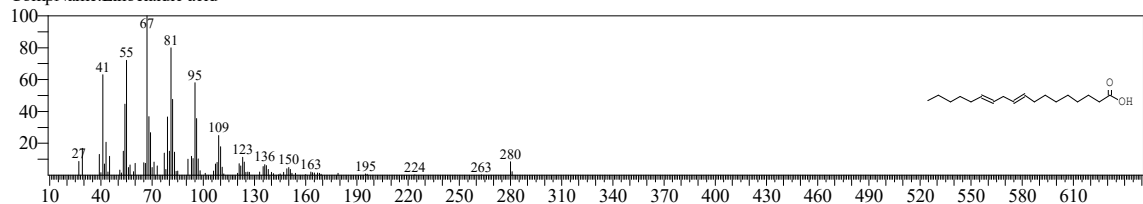

# TNAU

<< Target >>

Line#:11 R.Time:31.585(Scan#:5318) MassPeaks:393

RawMode:Averaged 31.580-31.590(5317-5319) BasePeak:79.05(2924)

BG Mode:Calc. from Peak Group 1 - Event 1 Q3 Scan

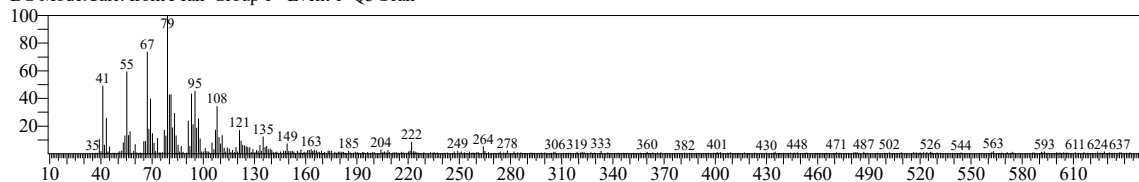

Hit#:1 Entry:137464 Library:NIST20M1.lib

SI:89 Formula:C18H30O2 CAS:463-40-1 MolWeight:278 RetIndex:2191

CompName:9,12,15-Octadecatrienoic acid, (Z,Z,Z)- \$ Linolenic acid \$ \$ \alpha\$-Linolenic acid \$ \$ All-cis-9,12,15-Octadecatrienoic acid \$ \$ cis,cis,cis-9,12,15-Octadecatrienoic acid

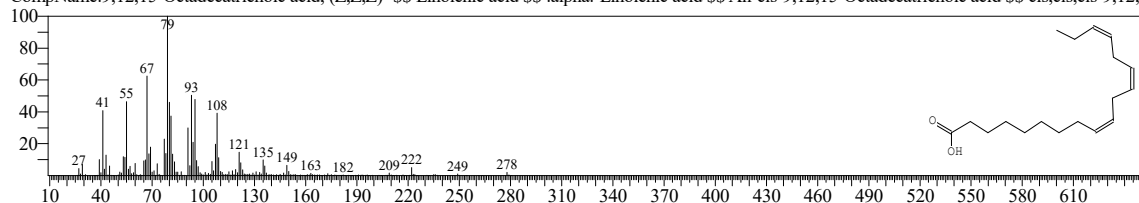

Hit#:2 Entry:87848 Library:NIST20M1.lib

SI:89 Formula:C16H26O CAS:56797-43-4 MolWeight:234 RetIndex:1824

CompName:cis,cis,cis-7,10,13-Hexadecatrienal \$ \$ (7Z,10Z,13Z)-7,10,13-Hexadecatrienal #

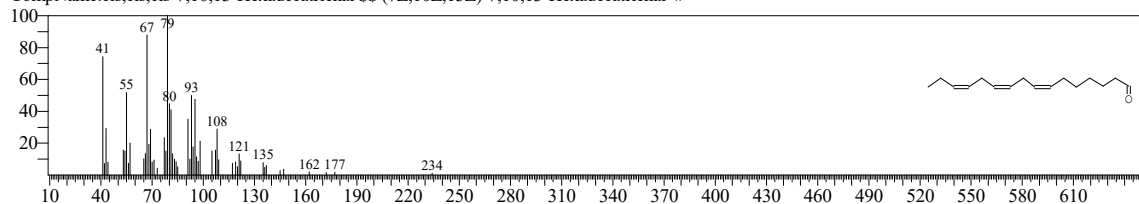

Hit#:3 Entry:35226 Library:NIST20R.lib

SI:88 Formula:C19H32O2 CAS:301-00-8 MolWeight:292 RetIndex:2101

CompName:9,12,15-Octadecatrienoic acid, methyl ester, (Z,Z,Z)- \$ Linolenic acid, methyl ester \$ \$ Methyl all-cis-9,12,15-octadecatrienoate \$ \$ Methyl lino

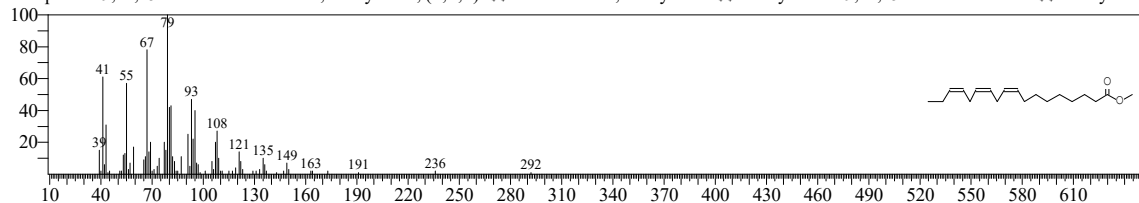

Hit#:4 Entry:32465 Library:NIST20R.lib

SI:87 Formula:C18H32O CAS:506-44-5 MolWeight:264 RetIndex:2077

CompName:9,12,15-Octadecatrien-1-ol, (Z,Z,Z)- \$ \$ (9E,12E,15E)-9,12,15-Octadecatrien-1-ol # \$ \$ (Z,Z,Z)-9,12,15-Octadecatrien-1-ol

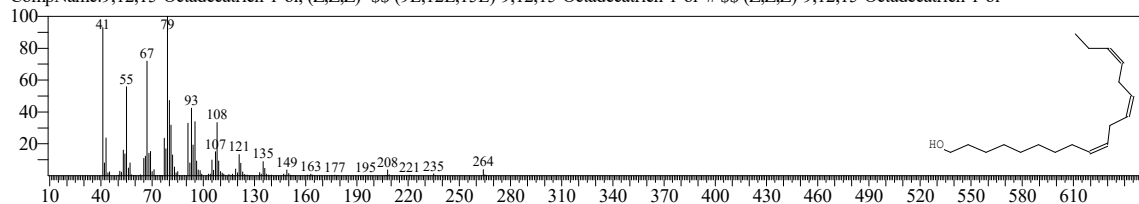

Hit#:5 Entry:77474 Library:NIST20M1.lib

SI:86 Formula:C15H28O CAS:77899-11-7 MolWeight:224 RetIndex:1771

CompName:(Z)6,(Z)9-Pentadecadien-1-ol \$ \$ (6Z,9Z)-6,9-Pentadecadien-1-ol #

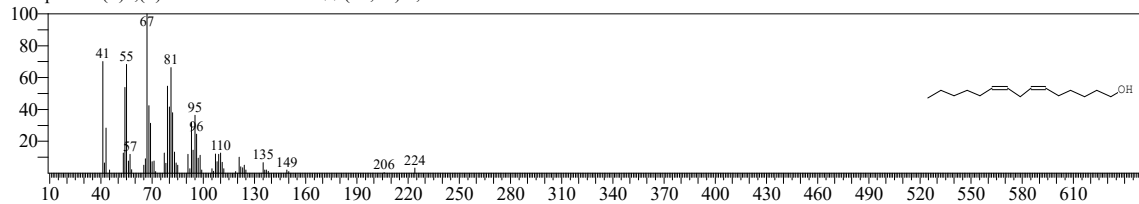

# TNAU

<< Target >>

Line#:12 R.Time:45.615(Scan#:8124) MassPeaks:405

RawMode:Averaged 45.610-45.620(8123-8125) BasePeak:139.15(5285)

BG Mode:Calc. from Peak Group 1 - Event 1 Q3 Scan

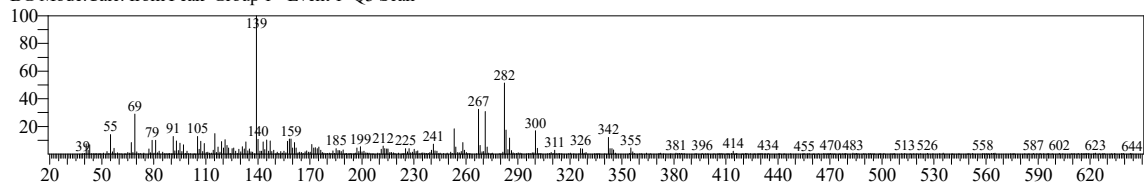

Hit#:1 Entry:8297 Library:NIST20M2.lib

SI:88 Formula:C27H42O3 CAS:512-04-9 MolWeight:414 RetIndex:2844

CompName:Diosgenin \$\$ Spirost-5-en-3-ol, (3.beta.,25R)- \$\$ Spirost-5-en-3.beta.-ol, (25R)- \$\$ Nitrogenin \$\$ 25D-spirost-5-en-3.beta.-ol \$\$ Spiro(8H-naph

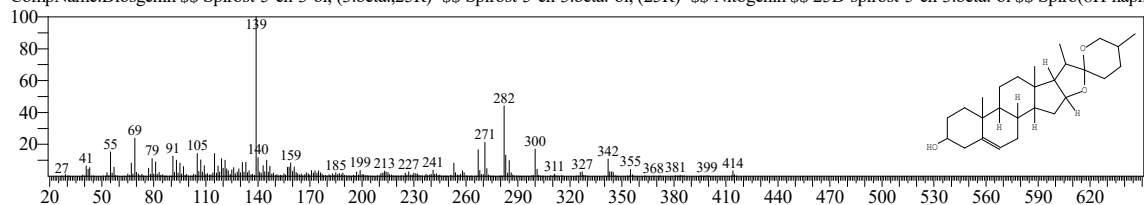

Hit#:2 Entry:14852 Library:NIST20M2.lib

SI:80 Formula:C28H44O3 CAS:116292-24-1 MolWeight:428 RetIndex:2793

CompName:Diosgenin methyl ether \$\$ Diosgenin Me derivative \$\$ (3.beta.,25R)-3-Methoxyspirost-5-ene \$\$ Spirost-5-ene, 3-methoxy-, (3.beta.,25R)-

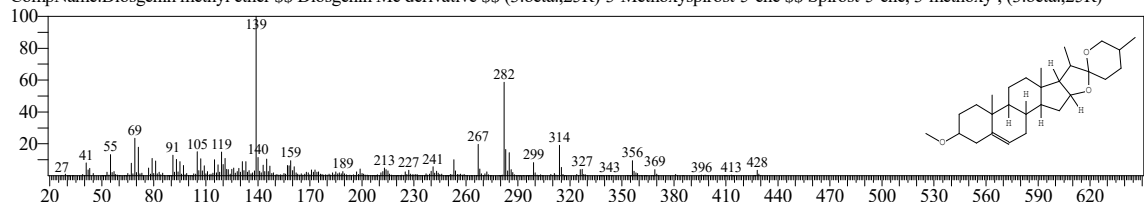

Hit#:3 Entry:41561 Library:NIST20R.lib

SI:79 Formula:C27H42O2 CAS:32277-73-9 MolWeight:398 RetIndex:2713

CompName:Des-N-solasodine \$\$ Furosta-5,20(22)-dien-3-ol #

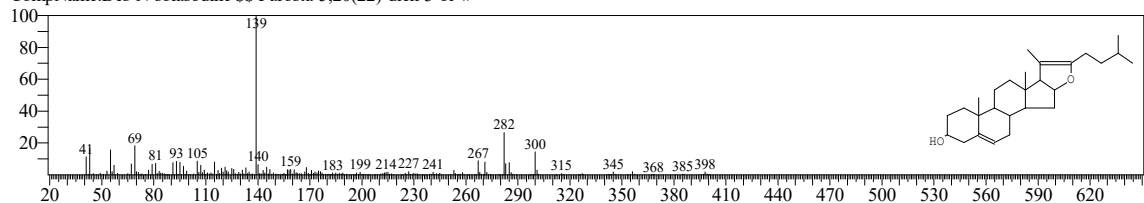

Hit#:4 Entry:24878 Library:NIST20M2.lib

SI:79 Formula:C29H44O4 CAS:1061-54-7 MolWeight:456 RetIndex:2984

CompName:Spirost-5-en-3-ol, acetate, (3.beta.,25R)- \$\$ Diosgenin acetate \$\$ Spirost-5-en-3.beta.-ol, acetate, (25R)- \$\$ Spirost-5-en-3.beta.-ol, acetate, (25R)-

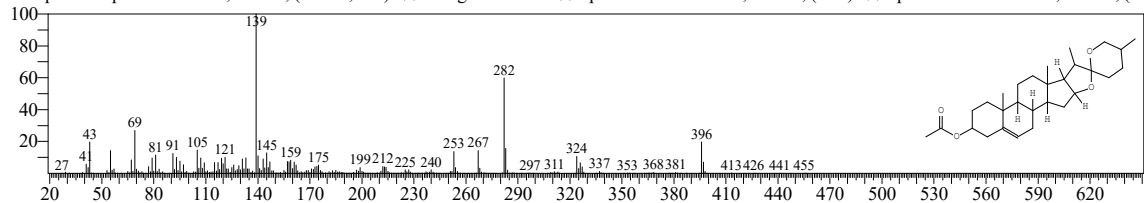

Hit#:5 Entry:42677 Library:NIST20R.lib

SI:74 Formula:C29H44O4 CAS:1180-12-7 MolWeight:456 RetIndex:2984

CompName:Neodiosgenin (3.beta.,25S) acetate \$\$ Spirost-5-en-3-ol, 3-acetate, (3.beta.,25S)- \$\$ Spirost-5-en-3-ol, acetate, (3.beta.,25S)- \$\$ Spirost-5-en-3-ol, acetate, (3.beta.,25S)-

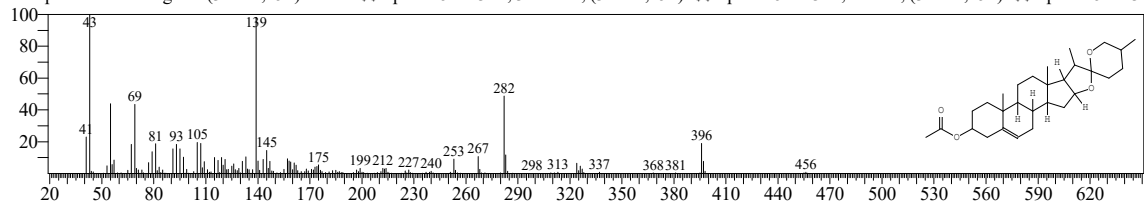

Supplement: Supplementary file 31 [file supplementary]
