# Supplementary material for: Comparative Metabolomics Profiling Reveals Key Metabolites and Associated Pathways Regulating Tuber Dormancy in White Yam (<em>Dioscorea rotundata</em>)
Source: Preprints.org preprint supplement (doi:10.20944/preprints202303.0378.v1), 2023-03-21

# TNAU

## Sample Information

Analyzed by : Admin  
 Analyzed : 05-Aug-22 2:39:28 AM  
 Sample Type : Unknown  
 Level # : 1  
 Sample Name : C115-3  
 Sample ID : C115-3  
 IS Amount : [1]=1  
 Sample Amount : 1  
 Dilution Factor : 1  
 Vial # : 16  
 Injection Volume : 1.00  
 Data File : D:\GCMS-8040NX\Aug 2022\Users\04.08.2022\Data files\04082022-016.qgd  
 Org Data File : D:\GCMS-8040NX\Aug 2022\Users\04.08.2022\Data files\04082022-016.qgd  
 Method File : D:\GCMS-8040NX\Aug 2022\Users\04.08.2022\Method file\27072022\_methodfile.qgm  
 Org Method File : D:\GCMS-8040NX\Aug 2022\Users\04.08.2022\Method file\27072022\_methodfile.qgm  
 Report File :  
 Tuning File : D:\GCMS-8040NX\Aug 2022\Tuning Data\TUNING 04082022.qgt  
 [Comment]  
 Jerry samples  
 Modified by : Admin  
 Modified : 05-Aug-22 4:32:35 PM

Chromatogram C115-3 D:\GCMS-8040NX\Aug 2022\Users\04.08.2022\Data files\04082022-016.qgd

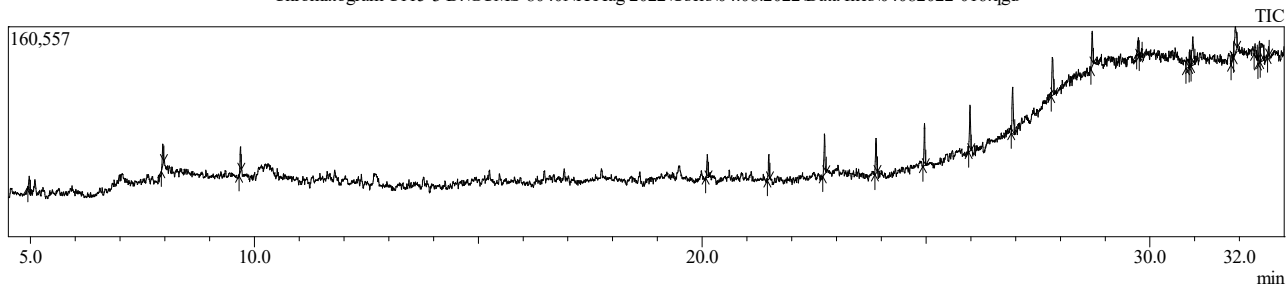

Peak Report TIC

| Peak# | R.Time | Area  | Area% | Height | Height% | A/H  | Similarity | Name                                |
|-------|--------|-------|-------|--------|---------|------|------------|-------------------------------------|
| 1     | 4.970  | 15547 | 1.89  | 11188  | 2.56    | 1.39 | 72         | 2-Propanol, 1,1'-oxybis-            |
| 2     | 7.953  | 28199 | 3.42  | 16499  | 3.78    | 1.71 | 83         | Tridecane                           |
| 3     | 9.688  | 28185 | 3.42  | 19174  | 4.39    | 1.47 | 89         | Undecane                            |
| 4     | 20.115 | 27310 | 3.32  | 17624  | 4.03    | 1.55 | 79         | Cyclodecasiloxane, eicosamethyl-    |
| 5     | 21.488 | 27892 | 3.39  | 18691  | 4.28    | 1.49 | 76         | Cyclooctasiloxane, hexadecamethyl-  |
| 6     | 22.732 | 50884 | 6.18  | 31016  | 7.10    | 1.64 | 78         | Cyclononasiloxane, octadecamethyl-  |
| 7     | 23.882 | 45179 | 5.49  | 26794  | 6.13    | 1.69 | 84         | Cyclodecasiloxane, eicosamethyl-    |
| 8     | 24.965 | 48050 | 5.83  | 32217  | 7.37    | 1.49 | 83         | Cyclodecasiloxane, eicosamethyl-    |
| 9     | 25.982 | 61294 | 7.44  | 35130  | 8.04    | 1.74 | 82         | Tetracosamethyl-cyclododecasiloxane |
| 10    | 26.933 | 68219 | 8.28  | 35607  | 8.15    | 1.92 | 79         | Cyclodecasiloxane, eicosamethyl-    |
| 11    | 27.822 | 57740 | 7.01  | 29143  | 6.67    | 1.98 | 75         | Tetracosamethyl-cyclododecasiloxane |
| 12    | 28.710 | 47424 | 5.76  | 26913  | 6.16    | 1.76 | 73         | Cyclodecasiloxane, eicosamethyl-    |
| 13    | 29.742 | 21832 | 2.65  | 13349  | 3.06    | 1.64 | 49         | 3,4-Dihydroxymandelic acid-4TMS     |
| 14    | 29.812 | 7458  | 0.91  | 6425   | 1.47    | 1.16 | 37         | Epinephrine-3TMS                    |
| 15    | 30.815 | 24104 | 2.93  | 8440   | 1.93    | 2.86 | 33         | 3,4-Dihydroxymandelic acid-4TMS     |
| 16    | 30.885 | 24519 | 2.98  | 12231  | 2.80    | 2.00 | 38         | Epinephrine-3TMS                    |
| 17    | 30.958 | 56312 | 6.84  | 21529  | 4.93    | 2.62 | 45         | 3,4-Dihydroxymandelic acid-4TMS     |
| 18    | 31.820 | 15615 | 1.90  | 8412   | 1.93    | 1.86 | 33         | Batyl alcohol-2TMS                  |
| 19    | 31.909 | 57953 | 7.04  | 19703  | 4.51    | 2.94 | 37         | 4-Hydroxybenzoic acid-2TMS          |
| 20    | 32.346 | 17283 | 2.10  | 8980   | 2.06    | 1.92 | 39         | Epinephrine-3TMS                    |
| 21    | 32.447 | 27785 | 3.37  | 16558  | 3.79    | 1.68 | 34         | Pyridoxine-3TMS                     |
| 22    | 32.484 | 57011 | 6.92  | 14011  | 3.21    | 4.07 | 45         | 3,4-Dihydroxymandelic acid-4TMS     |

# TNAU

| Peak# | R.Time | Area   | Area%  | Height | Height% | A/H  | Similarity | Name             |
|-------|--------|--------|--------|--------|---------|------|------------|------------------|
| 23    | 32.647 | 7813   | 0.95   | 7211   | 1.65    | 1.08 | 25         | Stearic acid-TMS |
|       |        | 823608 | 100.00 | 436845 | 100.00  |      |            |                  |

Library

<< Target >>

Line#:1 R.Time:4.970(Scan#:95) MassPeaks:263

RawMode:Averaged 4.965-4.975(94-96) BasePeak:89.10(2940)

BG Mode:Calc. from Peak Group 1 - Event 1 Q3 Scan

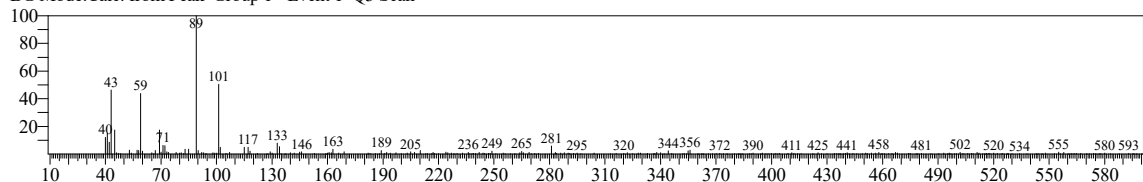

Hit#:1 Entry:7425 Library:NIST20R.lib

SI:72 Formula:C6H14O3 CAS:110-98-5 MolWeight:134 RetIndex:1018

CompName:2-Propanol, 1,1'-oxybis- \$ 2-Propanol, 1,1'-oxydi- \$ Bis(2-hydroxypropyl) ether \$ 1,1'-Oxydi-2-propanol \$ 2,2'-Dihydroxydipropyl ether \$

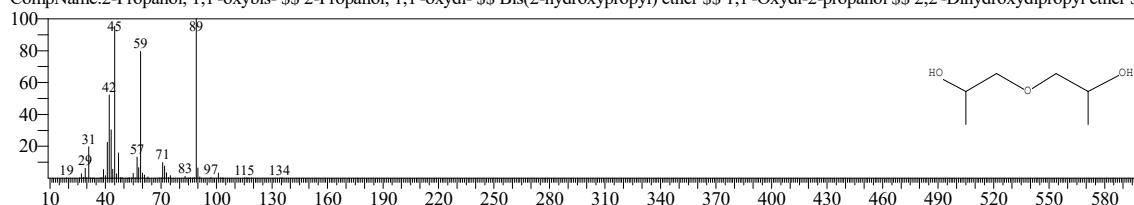

Hit#:2 Entry:9263 Library:NIST20M1.lib

SI:71 Formula:C6H12O3 CAS:21983-72-2 MolWeight:132 RetIndex:821

CompName:3,3-Dimethoxy-2-butanone

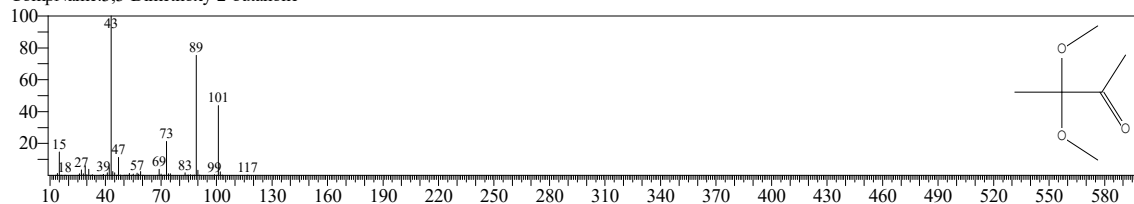

Hit#:3 Entry:120279 Library:NIST20M1.lib

SI:70 Formula:C12H24O6 CAS:0-00-0 MolWeight:264 RetIndex:1621

CompName:Isobutyl (2-(2-(2-methoxyethoxy)ethoxy)ethyl) carbonate

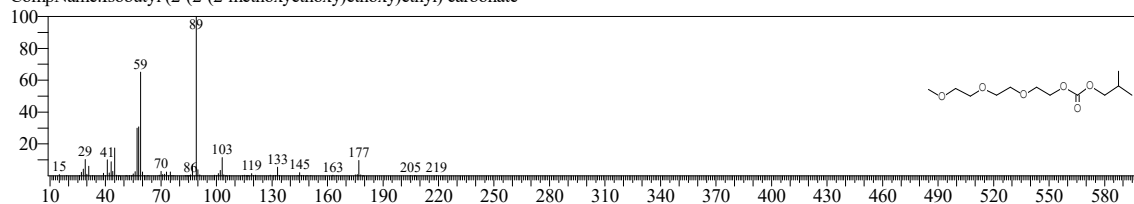

Hit#:4 Entry:39 Library:OA TMS\_DB5\_67min\_V3.lib

SI:52 Formula:C10H21NO3Si CAS:816-66-0 MolWeight:231 RetIndex:1181

CompName:2-Ketoisocaproic acid-meto-TMS(1) ; 4-methyl-2-oxopentanoic acid

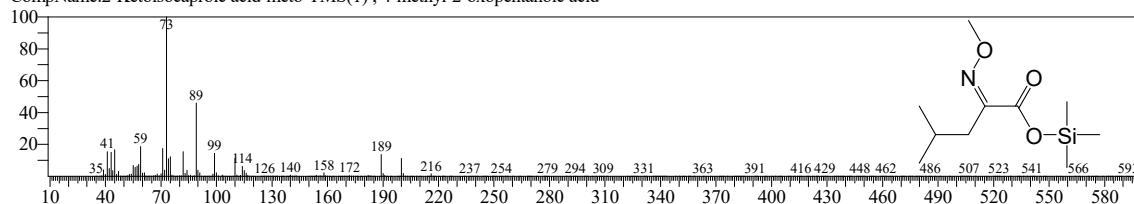

# TNAU

<< Target >>

Line#:1 R.Time:4.970(Scan#:95) MassPeaks:263

RawMode:Averaged 4.965-4.975(94-96) BasePeak:89.10(2940)

BG Mode:Calc. from Peak Group 1 - Event 1 Q3 Scan

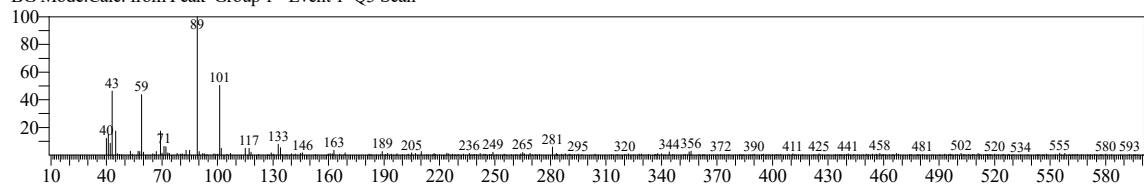

Hit#:5 Entry:1 Library:FA\_ME\_SP2560\_EI\_V3.lib

SI:51 Formula:C5H10O2 CAS:107-92-6 MolWeight:102 RetIndex:1113

CompName:Methyl butanoate ; Butanoic acid

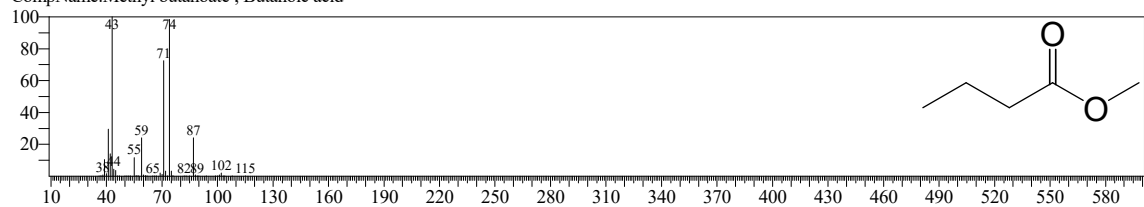

# TNAU

<< Target >>

Line#:2 R.Time:7.955(Scan#:692) MassPeaks:296

RawMode:Averaged 7.950-7.960(691-693) BasePeak:57.10(3526)

BG Mode:Calc. from Peak Group 1 - Event 1 Q3 Scan

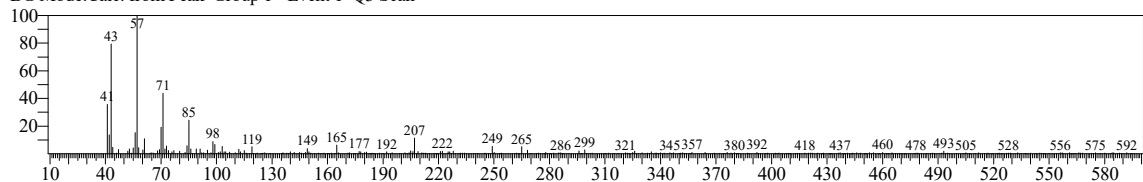

Hit#:1 Entry:40226 Library:NIST20M1.lib

SI:83 Formula:C13H28 CAS:629-50-5 MolWeight:184 RetIndex:1300

CompName:Tridecane \$\$ n-Tridecane \$\$ Tridecane, n-

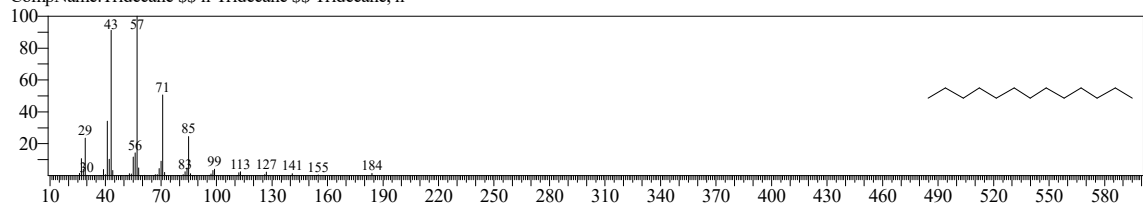

Hit#:2 Entry:12897 Library:NIST20R.lib

SI:83 Formula:C11H24 CAS:1120-21-4 MolWeight:156 RetIndex:1100

CompName:Undecane \$\$ n-Undecane \$\$ Hendecane \$\$ n-C11H24 \$\$ UN 2330

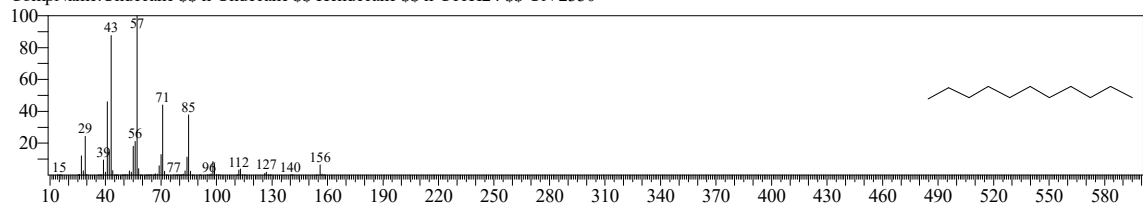

Hit#:3 Entry:13604 Library:NIST20M1.lib

SI:82 Formula:C10H22 CAS:124-18-5 MolWeight:142 RetIndex:1000

CompName:Decane \$\$ n-Decane \$\$ n-C10H22 \$\$ UN 2247

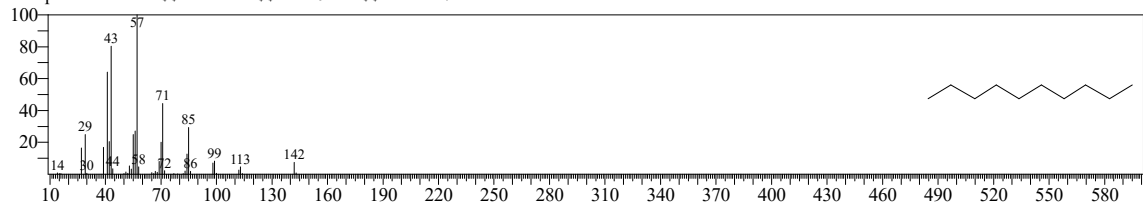

Hit#:4 Entry:40255 Library:NIST20M1.lib

SI:82 Formula:C13H28 CAS:62108-21-8 MolWeight:184 RetIndex:1185

CompName:Decane, 6-ethyl-2-methyl- \$\$ 6-Ethyl-2-methyldecane #

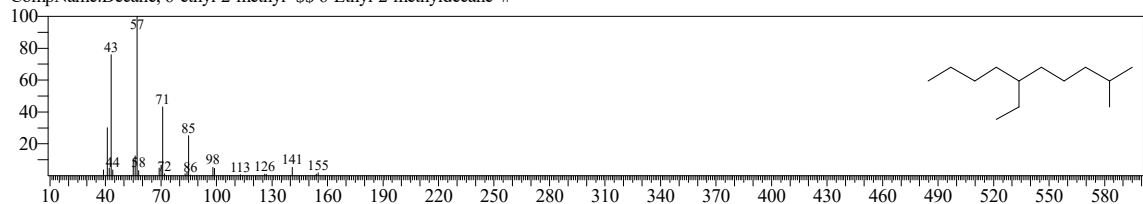

Hit#:5 Entry:30057 Library:NIST20M1.lib

SI:82 Formula:C12H26 CAS:112-40-3 MolWeight:170 RetIndex:1200

CompName:Dodecane \$\$ n-Dodecane \$\$ Adakane 12 \$\$ Ba 51-090453 \$\$ CH3(CH2)10CH3 \$\$ Bihexyl \$\$ Dihexyl \$\$ Duodecane \$\$ NSC 8714

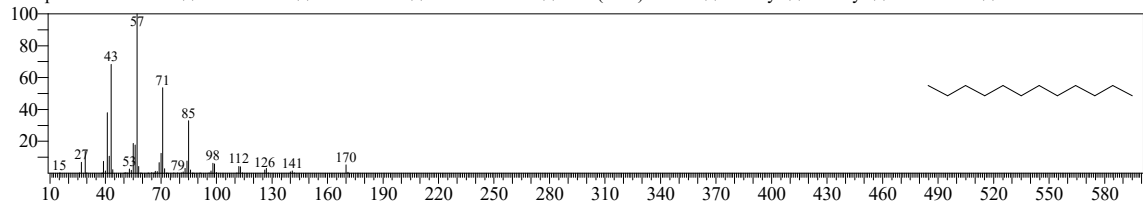

# TNAU

<< Target >>

Line#3 R.Time:9.690(Scan#:1039) MassPeaks:210

RawMode:Averaged 9.685-9.695(1038-1040) BasePeak:57.05(4656)

BG Mode:Calc. from Peak Group 1 - Event 1 Q3 Scan

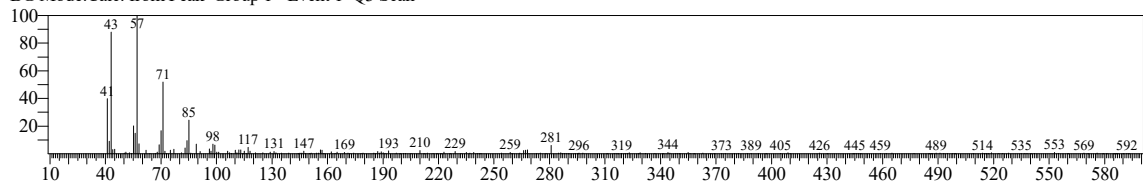

Hit#1 Entry:12897 Library:NIST20R.lib

SI:89 Formula:C11H24 CAS:1120-21-4 MolWeight:156 RetIndex:1100

CompName:Undecane \$\$ n-Undecane \$\$ Hendecane \$\$ n-C11H24 \$\$ UN 2330

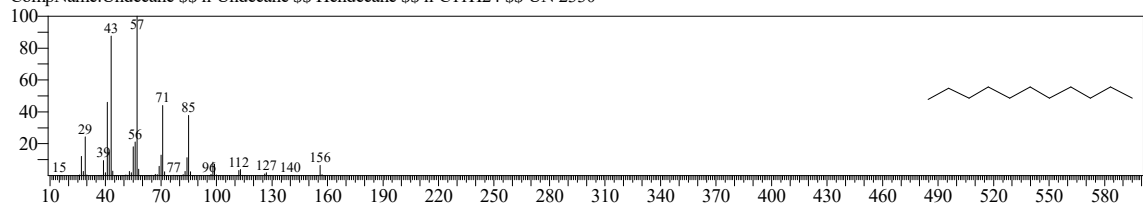

Hit#2 Entry:40226 Library:NIST20M1.lib

SI:88 Formula:C13H28 CAS:629-50-5 MolWeight:184 RetIndex:1300

CompName:Tridecane \$\$ n-Tridecane \$\$ Tridecane, n-

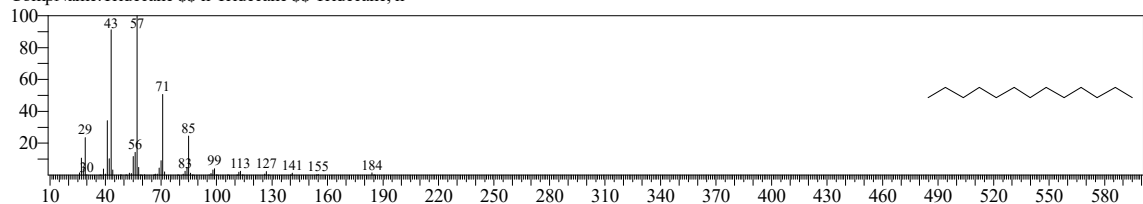

Hit#3 Entry:27736 Library:NIST20R.lib

SI:88 Formula:C16H34 CAS:544-76-3 MolWeight:226 RetIndex:1600

CompName:Hexadecane \$\$ n-Cetane \$\$ n-Hexadecane \$\$ Cetane

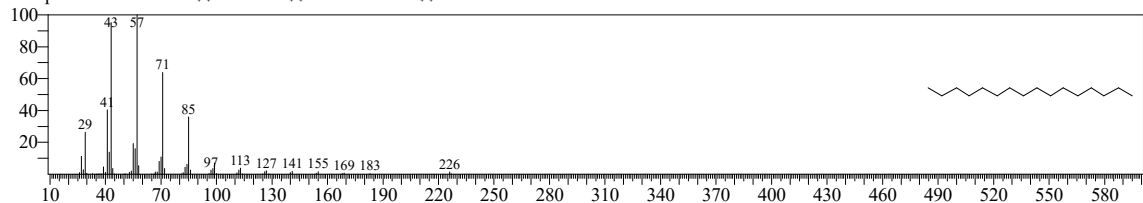

Hit#4 Entry:16191 Library:NIST20R.lib

SI:87 Formula:C12H26 CAS:112-40-3 MolWeight:170 RetIndex:1200

CompName:Dodecane \$\$ n-Dodecane \$\$ Adakane 12 \$\$ Ba 51-090453 \$\$ CH3(CH2)10CH3 \$\$ Bihexyl \$\$ Dihexyl \$\$ Duodecane \$\$ NSC 8714

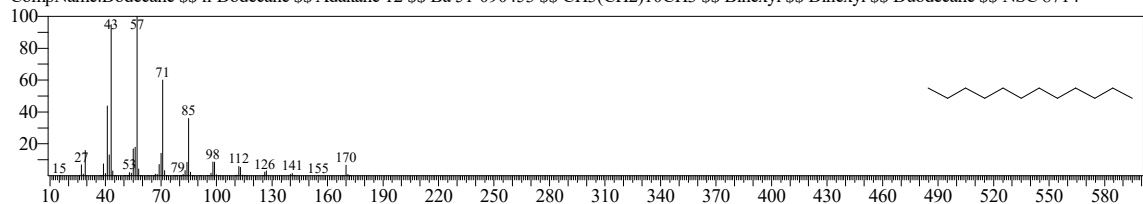

Hit#5 Entry:159057 Library:NIST20M1.lib

SI:87 Formula:C21H44 CAS:18344-37-1 MolWeight:296 RetIndex:1852

CompName:Heptadecane, 2,6,10,14-tetramethyl- \$\$ 2,6,10,14-Tetramethylheptadecane

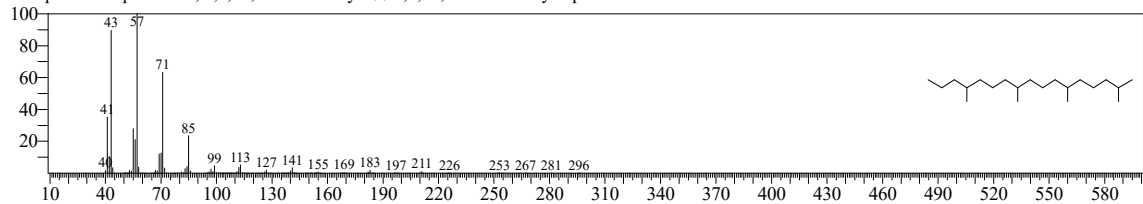

# TNAU

<< Target >>

Line#4 R.Time:20.115(Scan#:3124) MassPeaks:329

RawMode:Averaged 20.110-20.120(3123-3125) BasePeak:73.05(1897)

BG Mode:Calc. from Peak Group 1 - Event 1 Q3 Scan

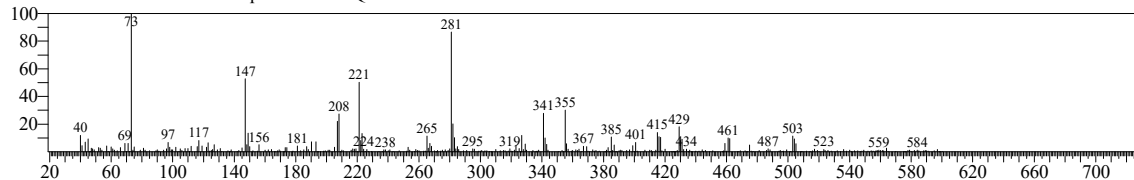

Hit#1 Entry:45685 Library:NIST20M2.lib

SI:79 Formula:C20H60O10Si10 CAS:18772-36-6 MolWeight:740 RetIndex:2067

CompName:Cyclodecasiloxane, eicosamethyl- \$\$ 2,2,4,4,6,6,8,8,10,10,12,12,14,14,16,16,18,18,20,20-Icosamethylcyclodecasiloxane # \$\$ Eicosamethyl-cy

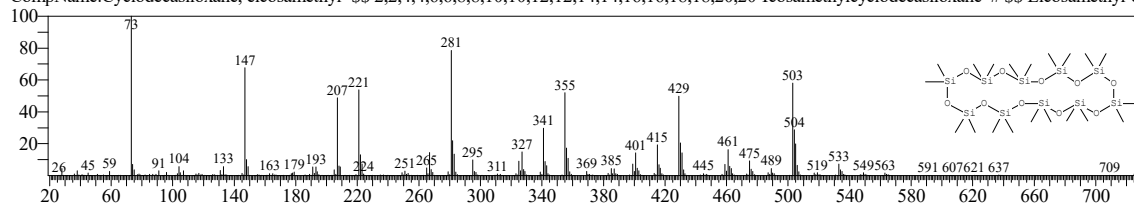

Hit#2 Entry:36969 Library:NIST20M2.lib

SI:70 Formula:C14H42O7Si7 CAS:107-50-6 MolWeight:518 RetIndex:1447

CompName:Cycloheptasiloxane, tetradecamethyl- \$\$ 2,2,4,4,6,6,8,8,10,10,12,12,14,14-Tetradecamethylcycloheptasiloxane # \$\$ Tetradecamethylcyclohept

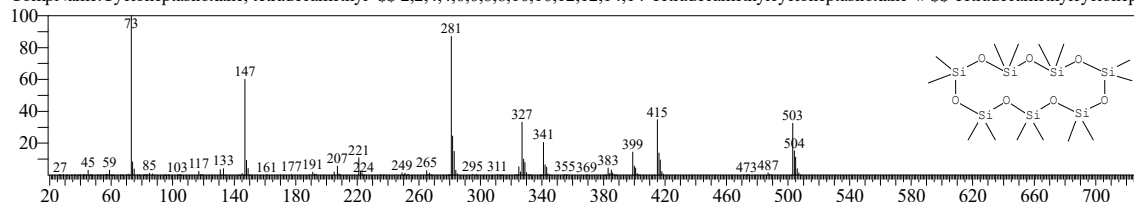

Hit#3 Entry:43658 Library:NIST20R.lib

SI:70 Formula:C18H54O9Si9 CAS:556-71-8 MolWeight:666 RetIndex:1860

CompName:Cyclononasiloxane, octadecamethyl- \$\$ Octadecamethyl-cyclononasiloxane \$\$ 2,2,4,4,6,6,8,8,10,10,12,12,14,14,16,16,18,18-Octadecamethylcy

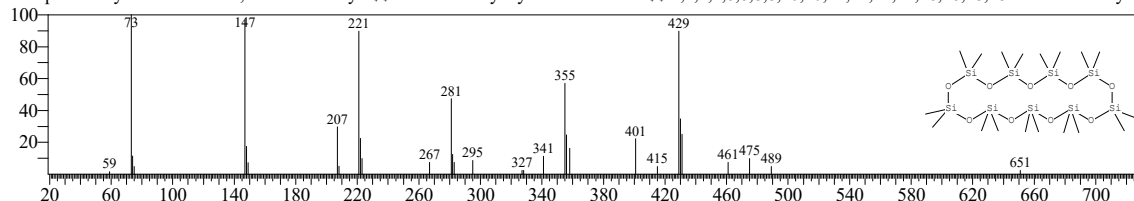

Hit#4 Entry:402 Library:OA\_TMS\_DB5\_67min\_V3.lib

SI:49 Formula:C20H42O4Si4 CAS:775-01-9 MolWeight:458 RetIndex:1942

CompName:3,4-Dihydroxymandelic acid-4TMS ; 2-(3,4-dihydroxyphenyl)-2-hydroxyacetic acid

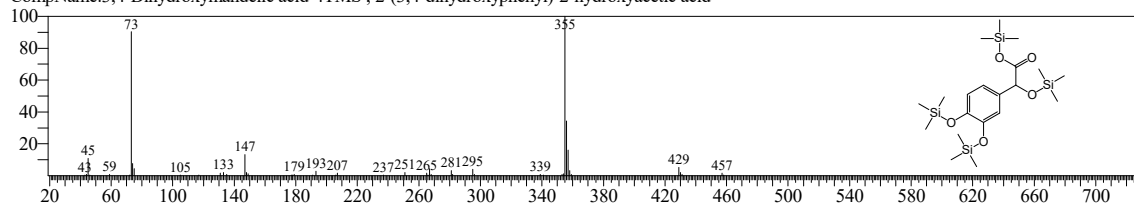

Hit#5 Entry:343 Library:OA\_TMS\_DB5\_67min\_V3.lib

SI:44 Formula:C18H37NO3Si3 CAS:51-43-4 MolWeight:399 RetIndex:1868

CompName:Epinephrine-3TMS ; 4-[(1R)-1-hydroxy-2-(methylamino)ethyl]benzene-1,2-diol

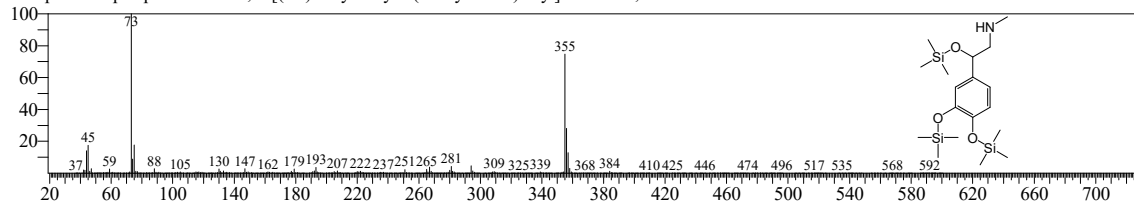

# TNAU

<< Target >>

Line#5 R.Time:21.490(Scan#:3399) MassPeaks:321

RawMode:Averaged 21.485-21.495(3398-3400) BasePeak:355.05(2296)

BG Mode:Calc. from Peak Group 1 - Event 1 Q3 Scan

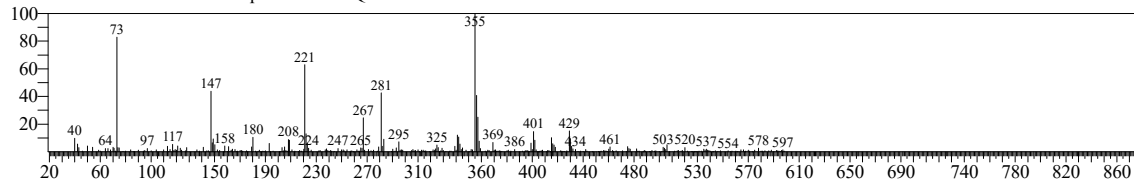

Hit#:1 Entry:42384 Library:NIST20M2.lib

SI:76 Formula:C16H48O8Si8 CAS:556-68-3 MolWeight:592 RetIndex:1654

CompName:Cyclooctasiloxane, hexadecamethyl- \$\$ Hexadecamethyl-cyclooctasiloxane \$\$ Hexadecamethylcyclooctasiloxane \$\$ 2,2,4,4,6,6,8,8,10,10,12,12

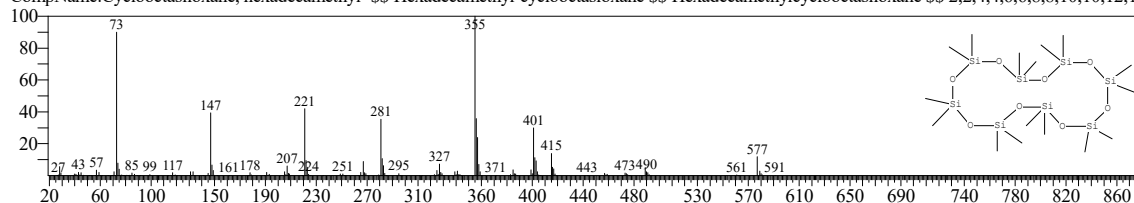

Hit#:2 Entry:44570 Library:NIST20M2.lib

SI:75 Formula:C18H54O9Si9 CAS:556-71-8 MolWeight:666 RetIndex:1860

CompName:Cyclononasiloxane, octadecamethyl- \$\$ Octadecamethyl-cyclononasiloxane \$\$ 2,2,4,4,6,6,8,8,10,10,12,12,14,14,16,16,18,18-Octadecamethyley

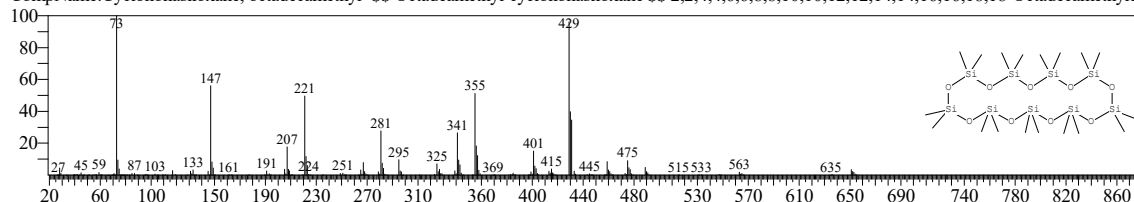

Hit#:3 Entry:46368 Library:NIST20M2.lib

SI:72 Formula:C24H72O12Si12 CAS:18919-94-3 MolWeight:888 RetIndex:2480

CompName:Tetracosamethyl-cyclododecasiloxane \$\$ 2,2,4,4,6,6,8,8,10,10,12,12,14,14,16,16,18,18,20,20,22,22,24,24-Tetracosamethylcyclododecasiloxan

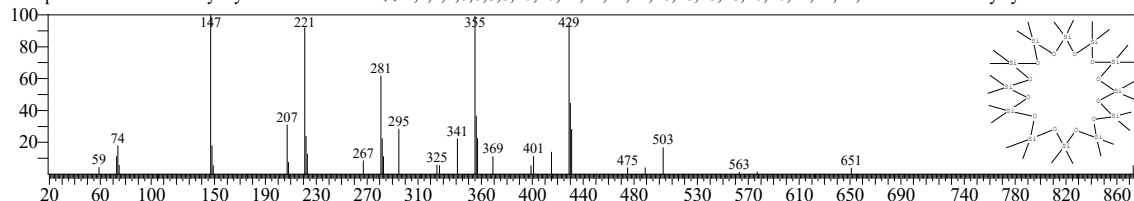

Hit#:4 Entry:45685 Library:NIST20M2.lib

SI:71 Formula:C20H60O10Si10 CAS:18772-36-6 MolWeight:740 RetIndex:2067

CompName:Cyclodecasiloxane, eicosamethyl- \$\$ 2,2,4,4,6,6,8,8,10,10,12,12,14,14,16,16,18,18,20,20-Icosamethylcyclodecasiloxane # \$\$ Eicosamethyl-cy

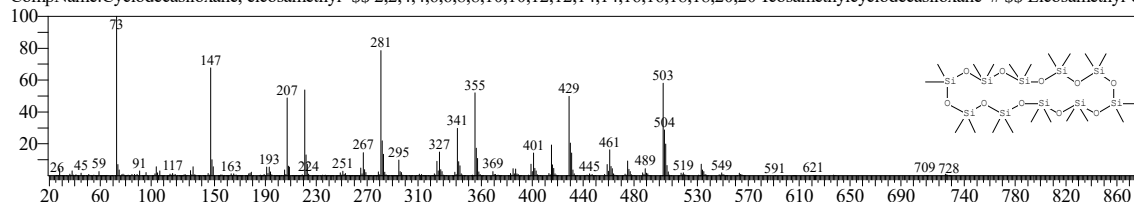

Hit#:5 Entry:402 Library:OA TMS DB5 67min V3.lib

SI:62 Formula:C20H42O4Si4 CAS:775-01-9 MolWeight:458 RetIndex:1942

CompName:3,4-Dihydroxymandelic acid-4TMS ; 2-(3,4-dihydroxyphenyl)-2-hydroxyacetic acid

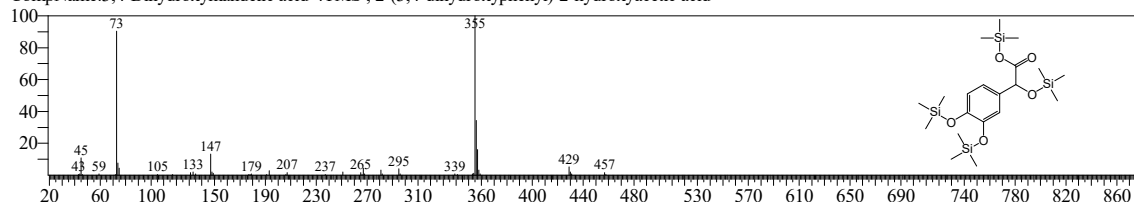

# TNAU

<< Target >>

Line#6 R.Time:22.730(Scan#:3647) MassPeaks:366

RawMode:Averaged 22.725-22.735(3646-3648) BasePeak:355.10(2479)

BG Mode:Calc. from Peak Group 1 - Event 1 Q3 Scan

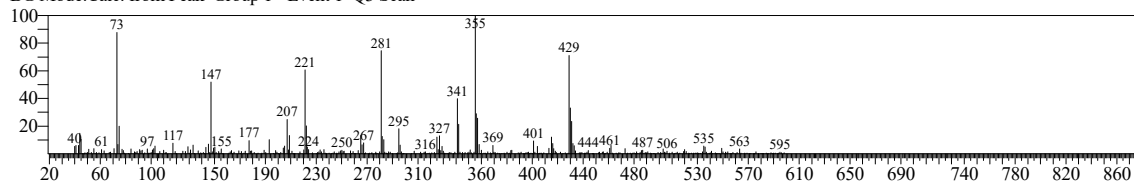

Hit#1 Entry:44570 Library:NIST20M2.lib

SI:78 Formula:C18H54O9Si9 CAS:556-71-8 MolWeight:666 RetIndex:1860

CompName:Cyclononasiloxane, octadecamethyl- \$ \$ Octadecamethyl-cyclononasiloxane \$ \$ 2,2,4,4,6,6,8,8,10,10,12,12,14,14,16,16,18,18-Octadecamethyl-

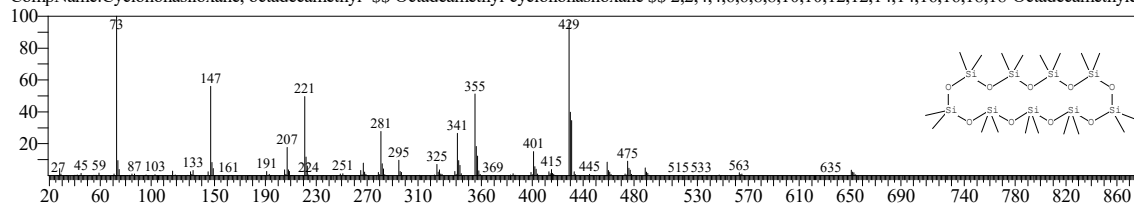

Hit#2 Entry:46368 Library:NIST20M2.lib

SI:75 Formula:C24H72O12Si12 CAS:18919-94-3 MolWeight:888 RetIndex:2480

CompName:Tetracosamethyl-cyclododecasiloxane \$ \$ 2,2,4,4,6,6,8,8,10,10,12,12,14,14,16,16,18,18,20,20,22,22,24,24-Tetracosamethylcyclododecasiloxane

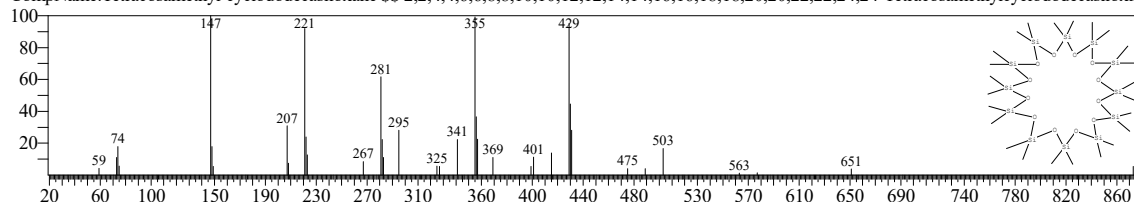

Hit#3 Entry:45685 Library:NIST20M2.lib

SI:73 Formula:C20H60O10Si10 CAS:18772-36-6 MolWeight:740 RetIndex:2067

CompName:Cyclodecasiloxane, eicosamethyl- \$ \$ 2,2,4,4,6,6,8,8,10,10,12,12,14,14,16,16,18,18,20,20-Icosamethylcyclodecasiloxane # \$ \$ Eicosamethyl-

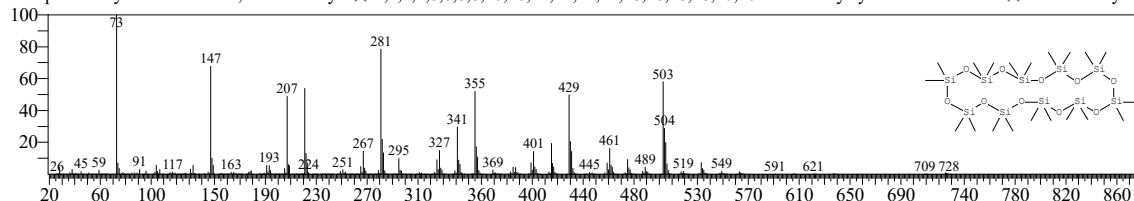

Hit#4 Entry:402 Library:OA\_TMS\_DB5\_67min\_V3.lib

SI:63 Formula:C20H42O4Si4 CAS:775-01-9 MolWeight:458 RetIndex:1942

CompName:3,4-Dihydroxymandelic acid-4TMS ; 2-(3,4-dihydroxyphenyl)-2-hydroxyacetic acid

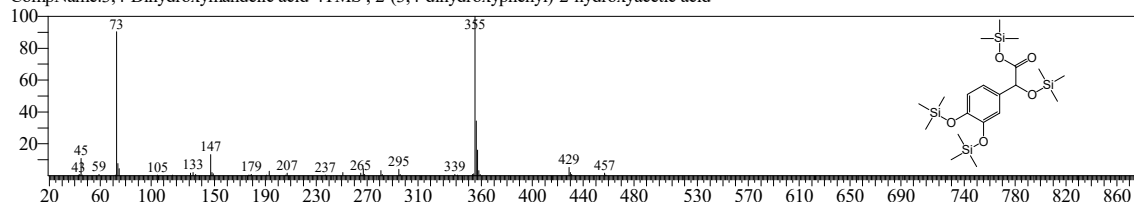

Hit#5 Entry:343 Library:OA\_TMS\_DB5\_67min\_V3.lib

SI:54 Formula:C18H37NO3Si3 CAS:51-43-4 MolWeight:399 RetIndex:1868

CompName:Epinephrine-3TMS ; 4-[(1R)-1-hydroxy-2-(methylamino)ethyl]benzene-1,2-diol

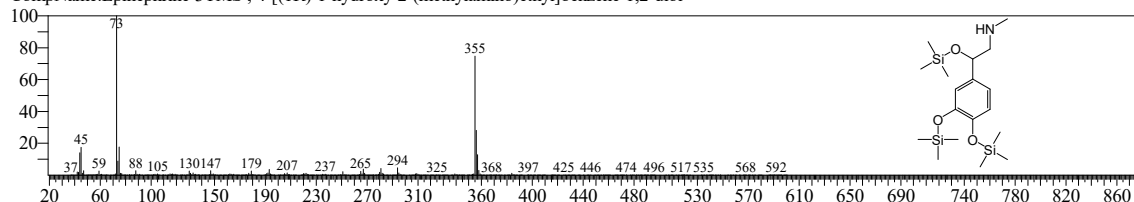



# TNAU

<< Target >>

Line#:7 R.Time:23.880(Scan#:3877) MassPeaks:286

RawMode:Averaged 23.875-23.885(3876-3878) BasePeak:281.00(2856)

BG Mode:Calc. from Peak Group 1 - Event 1 Q3 Scan

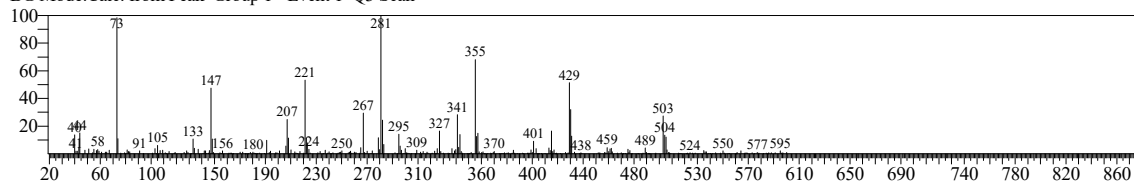

Hit#:1 Entry:45685 Library:NIST20M2.lib

SI:84 Formula:C20H60O10Si10 CAS:18772-36-6 MolWeight:740 RetIndex:2067

CompName:Cyclodecasiloxane, eicosamethyl- \$\$ 2,2,4,4,6,6,8,8,10,10,12,12,14,14,16,16,18,18,20,20-Icosamethylcyclodecasiloxane # \$\$ Eicosamethyl-cy

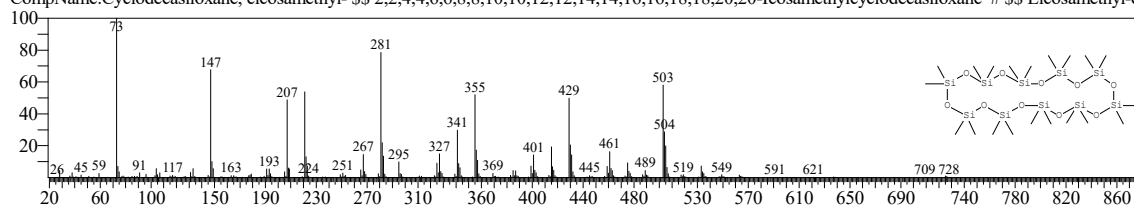

Hit#:2 Entry:44570 Library:NIST20M2.lib

SI:79 Formula:C18H54O9Si9 CAS:556-71-8 MolWeight:666 RetIndex:1860

CompName:Cyclononasiloxane, octadecamethyl- \$\$ Octadecamethyl-cyclononasiloxane \$\$ 2,2,4,4,6,6,8,8,10,10,12,12,14,14,16,16,18,18-Octadecamethyley



Hit#:3 Entry:46368 Library:NIST20M2.lib

SI:75 Formula:C24H72O12Si12 CAS:18919-94-3 MolWeight:888 RetIndex:2480

CompName:Tetracosamethyl-cyclododecasiloxane \$\$ 2,2,4,4,6,6,8,8,10,10,12,12,14,14,16,16,18,18,20,20,22,22,24,24-Tetracosamethylcyclododecasiloxan

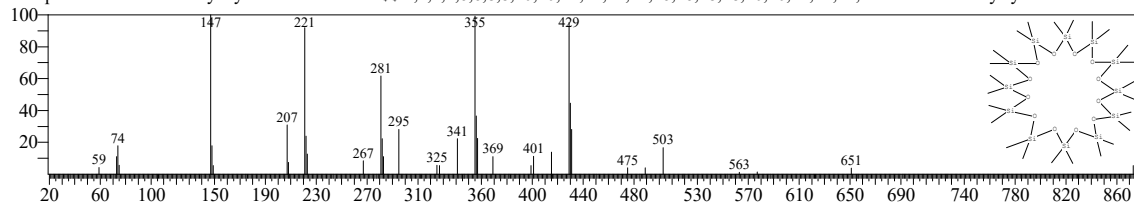

Hit#:4 Entry:402 Library:OA\_TMS\_DB5\_67min\_V3.lib

SI:57 Formula:C20H42O4Si4 CAS:775-01-9 MolWeight:458 RetIndex:1942

CompName:3,4-Dihydroxymandelic acid-4TMS ; 2-(3,4-dihydroxyphenyl)-2-hydroxyacetic acid

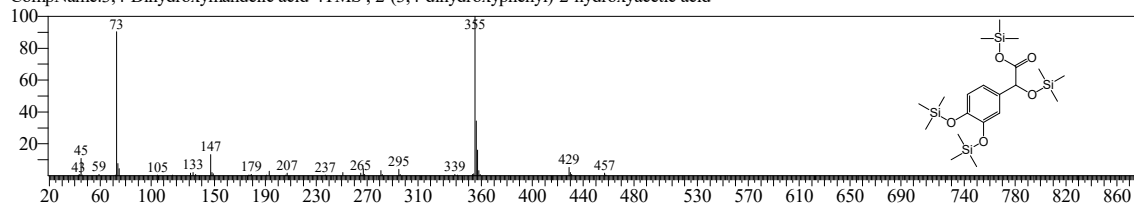

Hit#:5 Entry:343 Library:OA\_TMS\_DB5\_67min\_V3.lib

SI:50 Formula:C18H37NO3Si3 CAS:51-43-4 MolWeight:399 RetIndex:1868

CompName:Epinephrine-3TMS ; 4-[(1R)-1-hydroxy-2-(methylamino)ethyl]benzene-1,2-diol

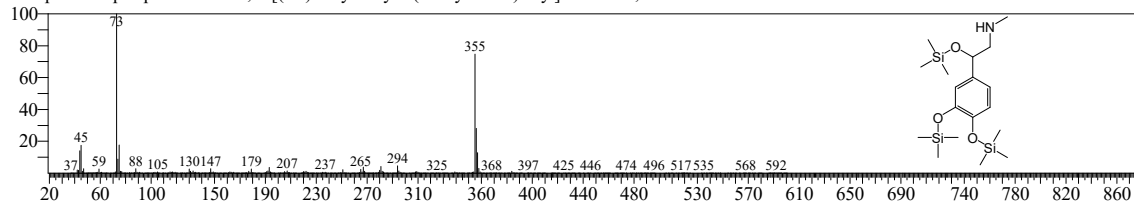

# TNAU

<< Target >>

Line#8 R.Time:24.965(Scan#:4094) MassPeaks:310

RawMode:Averaged 24.960-24.970(4093-4095) BasePeak:281.10(2933)

BG Mode:Calc. from Peak Group 1 - Event 1 Q3 Scan

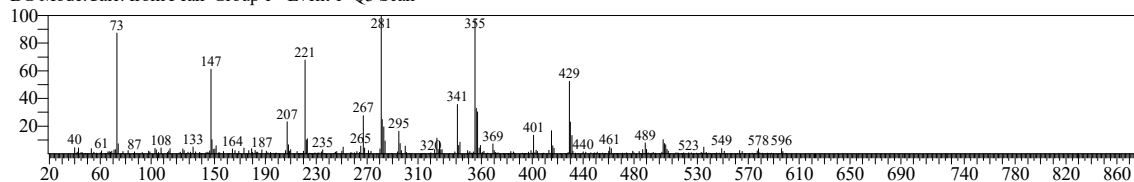

Hit#1 Entry:45685 Library:NIST20M2.lib

SI:83 Formula:C20H60O10Si10 CAS:18772-36-6 MolWeight:740 RetIndex:2067

CompName:Cyclodecasiloxane, eicosamethyl- \$\$ 2,2,4,4,6,6,8,8,10,10,12,12,14,14,16,16,18,18,20,20-Icosamethylcyclodecasiloxane # \$\$ Eicosamethyl-cy

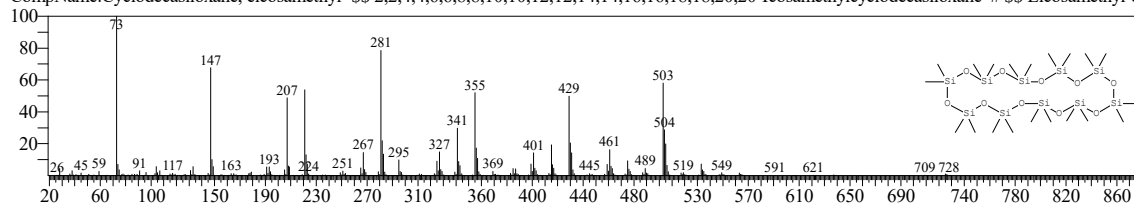

Hit#2 Entry:46368 Library:NIST20M2.lib

SI:80 Formula:C24H72O12Si12 CAS:18919-94-3 MolWeight:888 RetIndex:2480

CompName:Tetracosamethyl-cyclodecasiloxane \$\$ 2,2,4,4,6,6,8,8,10,10,12,12,14,14,16,16,18,18,20,20,22,22,24,24-Tetracosamethylcyclodecasiloxane



Hit#3 Entry:44570 Library:NIST20M2.lib

SI:78 Formula:C18H54O9Si9 CAS:556-71-8 MolWeight:666 RetIndex:1860

CompName:Cyclononasiloxane, octadecamethyl- \$\$ Octadecamethyl-cyclononasiloxane \$\$ 2,2,4,4,6,6,8,8,10,10,12,12,14,14,16,16,18,18-Octadecamethylcy

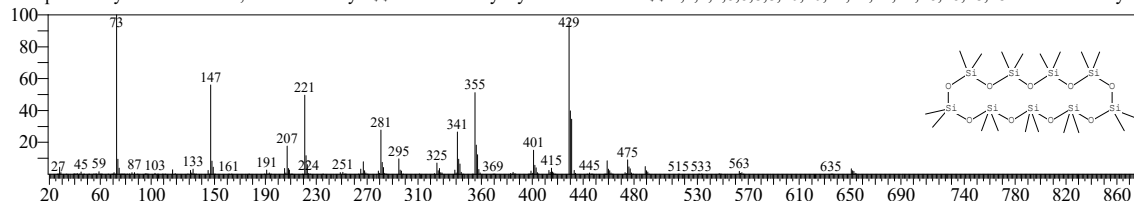

Hit#4 Entry:42384 Library:NIST20M2.lib

SI:72 Formula:C16H48O8Si8 CAS:556-68-3 MolWeight:592 RetIndex:1654

CompName:Cyclooctasiloxane, hexadecamethyl- \$\$ Hexadecamethyl-cyclooctasiloxane \$\$ Hexadecamethylcyclooctasiloxane \$\$ 2,2,4,4,6,6,8,8,10,10,12,12

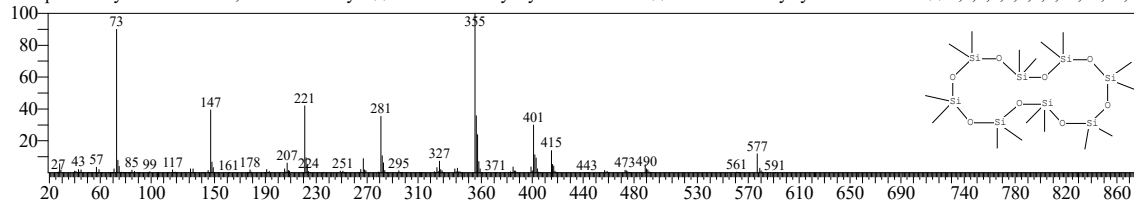

Hit#5 Entry:43312 Library:NIST20R.lib

SI:72 Formula:C16H48O6Si7 CAS:541-01-5 MolWeight:532 RetIndex:1437

CompName:Heptasiloxane, hexadecamethyl- \$\$ Hexadecamethylheptasiloxane \$\$ 1,1,1,3,3,5,5,7,7,9,9,11,11,13,13,13-Hexadecamethylheptasiloxane #

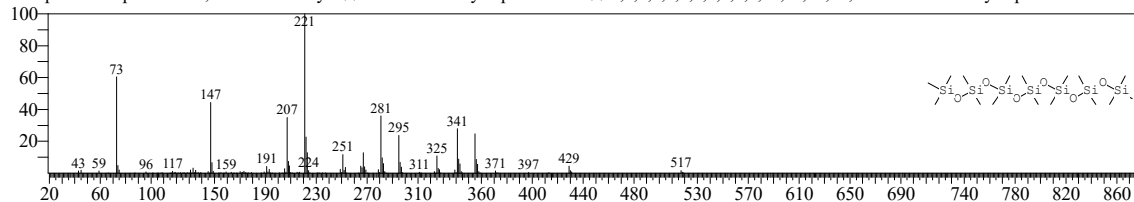

# TNAU

<< Target >>

Line#9 R.Time:25.980(Scan#:4297) MassPeaks:308

RawMode:Averaged 25.975-25.985(4296-4298) BasePeak:429.10(2803)

BG Mode:Calc. from Peak Group 1 - Event 1 Q3 Scan

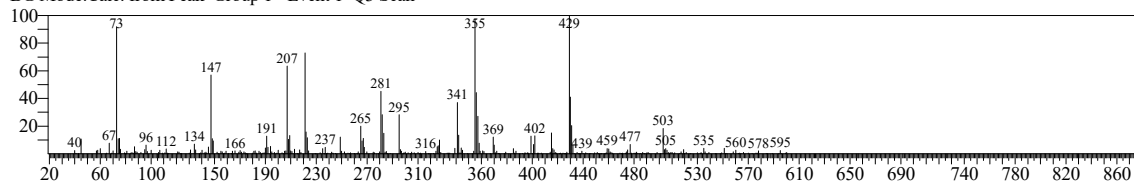

Hit#:1 Entry:46368 Library:NIST20M2.lib

SI:82 Formula:C24H72O12Si12 CAS:18919-94-3 MolWeight:888 RetIndex:2480

CompName:Tetracosamethylcyclododecasiloxane \$\$ 2,2,4,4,6,6,8,8,10,10,12,12,14,14,16,16,18,18,20,20,22,22,24,24-Tetracosamethylcyclododecasiloxane

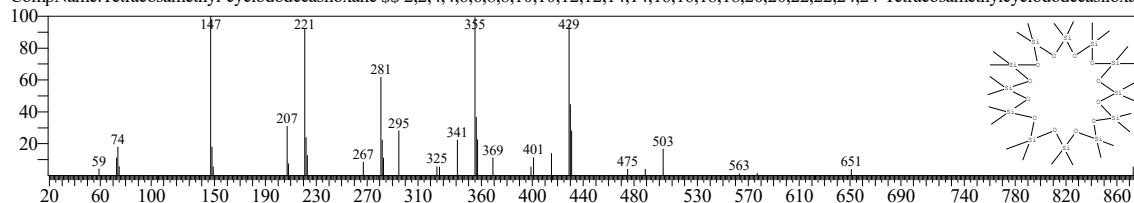

Hit#:2 Entry:44570 Library:NIST20M2.lib

SI:79 Formula:C18H54O9Si9 CAS:556-71-8 MolWeight:666 RetIndex:1860

CompName:Cyclononasiloxane, octadecamethyl- \$\$ Octadecamethyl-cyclononasiloxane \$\$ 2,2,4,4,6,6,8,8,10,10,12,12,14,14,16,16,18,18-Octadecamethyle



Hit#:3 Entry:45685 Library:NIST20M2.lib

SI:77 Formula:C20H60O10Si10 CAS:18772-36-6 MolWeight:740 RetIndex:2067

CompName:Cyclodecasiloxane, eicosamethyl- \$\$ 2,2,4,4,6,6,8,8,10,10,12,12,14,14,16,16,18,18,20,20-Icosamethylcyclodecasiloxane # \$\$ Eicosamethyl-cy



Hit#:4 Entry:43312 Library:NIST20R.lib

SI:71 Formula:C16H48O6Si7 CAS:541-01-5 MolWeight:532 RetIndex:1437

CompName:Heptasiloxane, hexadecamethyl- \$\$ Hexadecamethylheptasiloxane # \$ 1,1,1,3,3,5,5,7,7,9,9,11,11,13,13,13-Hexadecamethylheptasiloxane #

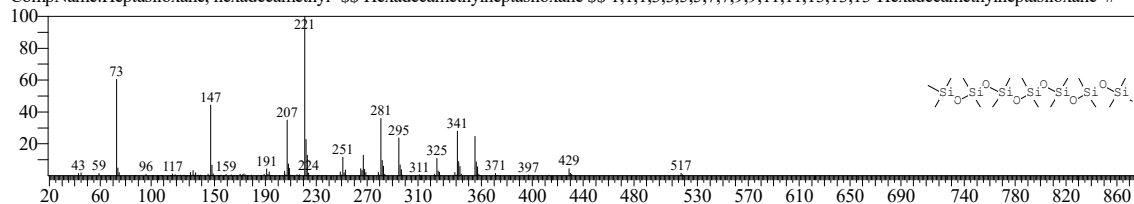

Hit#:5 Entry:402 Library:OA TMS DB5 67min V3.lib

SI:60 Formula:C20H42O4Si4 CAS:775-01-9 MolWeight:458 RetIndex:1942

CompName:3,4-Dihydroxymandelic acid-4TMS ; 2-(3,4-dihydroxyphenyl)-2-hydroxyacetic acid

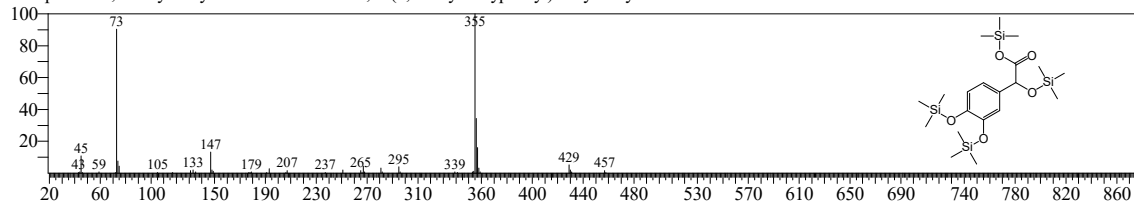

# TNAU

<< Target >>

Line#:10 R.Time:26.935(Scan#:4488) MassPeaks:334

RawMode:Averaged 26.930-26.940(4487-4489) BasePeak:281.10(3402)

BG Mode:Calc. from Peak Group 1 - Event 1 Q3 Scan

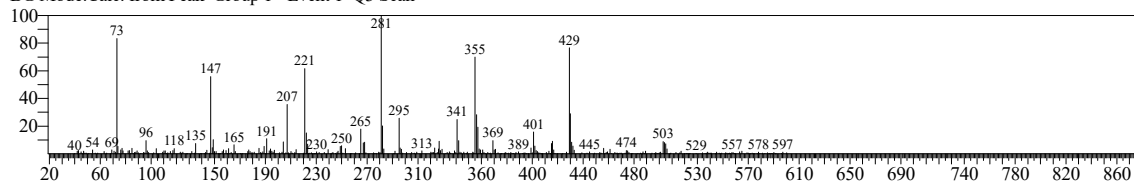

Hit#:1 Entry:45685 Library:NIST20M2.lib

SI:79 Formula:C20H60O10Si10 CAS:18772-36-6 MolWeight:740 RetIndex:2067

CompName:Cyclodecasiloxane, eicosamethyl- \$\$ 2,2,4,4,6,6,8,8,10,10,12,12,14,14,16,16,18,18,20,20-Icosamethylcyclodecasiloxane # \$\$ Eicosamethyl-cy



Hit#:2 Entry:46368 Library:NIST20M2.lib

SI:78 Formula:C24H72O12Si12 CAS:18919-94-3 MolWeight:888 RetIndex:2480

CompName:Tetracosamethyl-cyclodecasiloxane \$\$ 2,2,4,4,6,6,8,8,10,10,12,12,14,14,16,16,18,18,20,20,22,22,24,24-Tetracosamethylcyclodecasiloxane



Hit#:3 Entry:44570 Library:NIST20M2.lib

SI:77 Formula:C18H54O9Si9 CAS:556-71-8 MolWeight:666 RetIndex:1860

CompName:Cyclononasiloxane, octadecamethyl- \$\$ Octadecamethyl-cyclononasiloxane \$\$ 2,2,4,4,6,6,8,8,10,10,12,12,14,14,16,16,18,18-Octadecamethylcy



Hit#:4 Entry:43312 Library:NIST20R.lib

SI:70 Formula:C16H48O6Si7 CAS:541-01-5 MolWeight:532 RetIndex:1437

CompName:Heptasiloxane, hexadecamethyl- \$\$ Hexadecamethylheptasiloxane \$\$ 1,1,1,3,3,5,5,7,7,9,9,11,11,13,13,13-Hexadecamethylheptasiloxane #

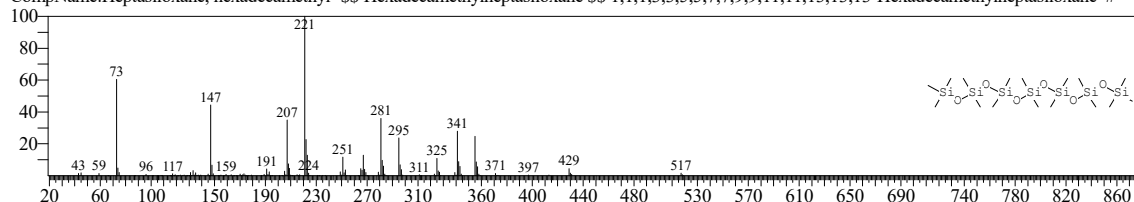

Hit#:5 Entry:402 Library:OA TMS DB5 67min V3.lib

SI:59 Formula:C20H42O4Si4 CAS:775-01-9 MolWeight:458 RetIndex:1942

CompName:3,4-Dihydroxymandelic acid-4TMS ; 2-(3,4-dihydroxyphenyl)-2-hydroxyacetic acid



# TNAU

<< Target >>

Line#:11 R.Time:27.820(Scan#:4665) MassPeaks:305

RawMode:Averaged 27.815-27.825(4664-4666) BasePeak:281.00(3088)

BG Mode:Calc. from Peak Group 1 - Event 1 Q3 Scan

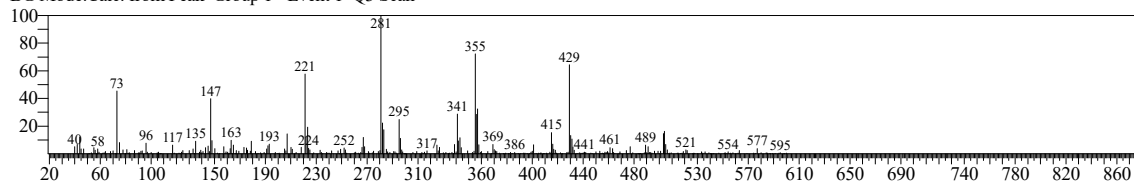

Hit#:1 Entry:46368 Library:NIST20M2.lib

SI:75 Formula:C<sub>24</sub>H<sub>72</sub>O<sub>12</sub>Si<sub>12</sub> CAS:18919-94-3 MolWeight:888 RetIndex:2480

CompName:Tetracosamethyl-cyclododecasiloxane \$ 2,2,4,4,6,6,8,8,10,10,12,12,14,14,16,16,18,18,20,20,22,22,24,24-Tetracosamethylcyclododecasiloxan

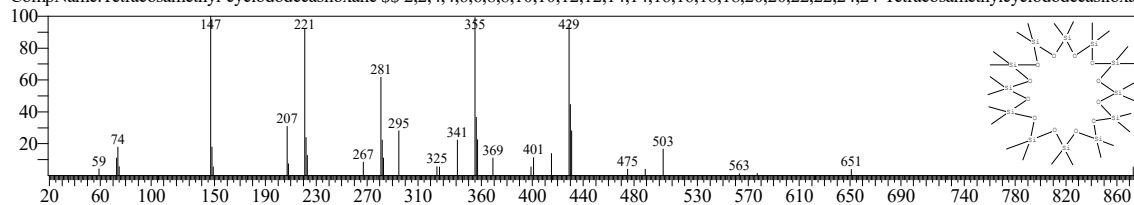

Hit#:2 Entry:45685 Library:NIST20M2.lib

SI:75 Formula:C<sub>20</sub>H<sub>60</sub>O<sub>10</sub>Si<sub>10</sub> CAS:18772-36-6 MolWeight:740 RetIndex:2067

CompName:Cyclodecasiloxane, eicosamethyl- \$ 2,2,4,4,6,6,8,8,10,10,12,12,14,14,16,16,18,18,20,20-Icosamethylcyclodecasiloxane # \$ Eicosamethyl-cy

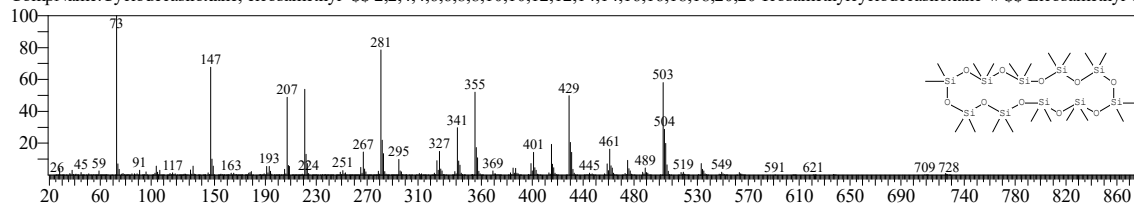

Hit#:3 Entry:44570 Library:NIST20M2.lib

SI:74 Formula:C<sub>18</sub>H<sub>54</sub>O<sub>9</sub>Si<sub>9</sub> CAS:556-71-8 MolWeight:666 RetIndex:1860

CompName:Cyclononasiloxane, octadecamethyl- \$ Octadecamethyl-cyclononasiloxane \$ 2,2,4,4,6,6,8,8,10,10,12,12,14,14,16,16,18,18-Octadecamethylcy

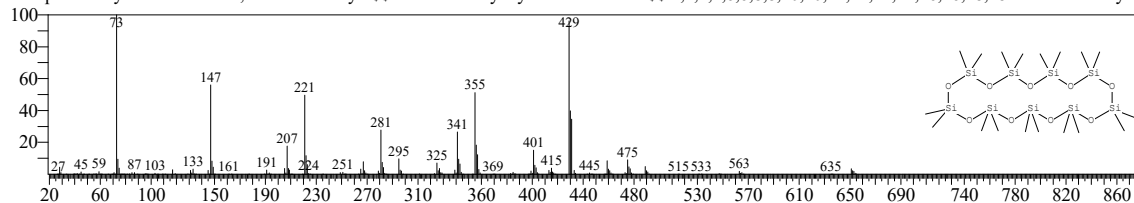

Hit#:4 Entry:402 Library:OA\_TMS\_DB5\_67min\_V3.lib

SI:55 Formula:C<sub>20</sub>H<sub>42</sub>O<sub>4</sub>Si<sub>4</sub> CAS:775-01-9 MolWeight:458 RetIndex:1942

CompName:3,4-Dihydroxymandelic acid-4TMS ; 2-(3,4-dihydroxyphenyl)-2-hydroxyacetic acid



Hit#:5 Entry:343 Library:OA\_TMS\_DB5\_67min\_V3.lib

SI:48 Formula:C<sub>18</sub>H<sub>37</sub>NO<sub>3</sub>Si<sub>3</sub> CAS:51-43-4 MolWeight:399 RetIndex:1868

CompName:Epinephrine-3TMS ; 4-[(1R)-1-hydroxy-2-(methylamino)ethyl]benzene-1,2-diol

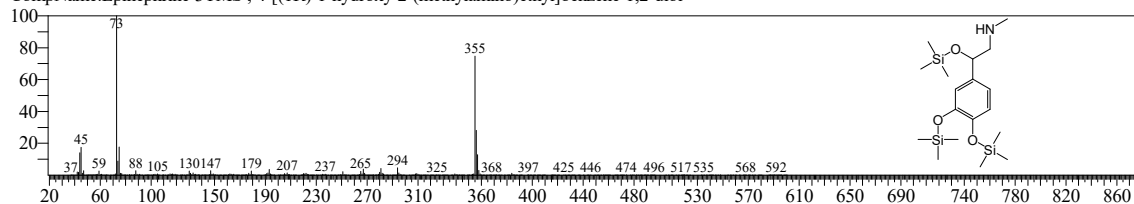

# TNAU

<< Target >>

Line#:12 R.Time:28.710(Scan#:4843) MassPeaks:313

RawMode:Averaged 28.705-28.715(4842-4844) BasePeak:281.00(3385)

BG Mode:Calc. from Peak Group 1 - Event 1 Q3 Scan

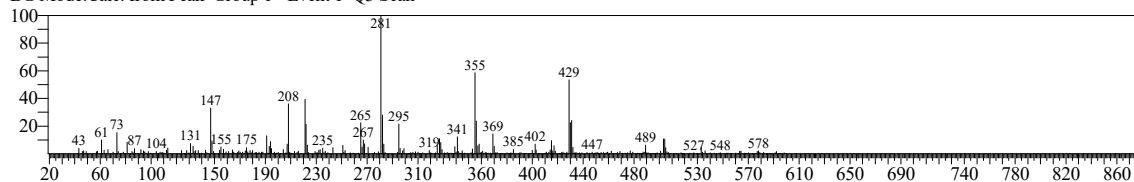

Hit#:1 Entry:45685 Library:NIST20M2.lib

SI:73 Formula:C20H60O10Si10 CAS:18772-36-6 MolWeight:740 RetIndex:2067

CompName:Cyclodecasiloxane, eicosamethyl- \$\$ 2,2,4,4,6,6,8,8,10,10,12,12,14,14,16,16,18,18,20,20-Icosamethylcyclodecasiloxane # \$\$ Eicosamethyl-cy



Hit#:2 Entry:46368 Library:NIST20M2.lib

SI:73 Formula:C24H72O12Si12 CAS:18919-94-3 MolWeight:888 RetIndex:2480

CompName:Tetracosamethylcyclododecasiloxane \$\$ 2,2,4,4,6,6,8,8,10,10,12,12,14,14,16,16,18,18,20,20,22,22,24,24-Tetracosamethylcyclododecasiloxane



Hit#:3 Entry:402 Library:OA\_TMS\_DB5\_67min\_V3.lib

SI:52 Formula:C20H42O4Si4 CAS:775-01-9 MolWeight:458 RetIndex:1942

CompName:3,4-Dihydroxymandelic acid-4TMS ; 2-(3,4-dihydroxyphenyl)-2-hydroxyacetic acid

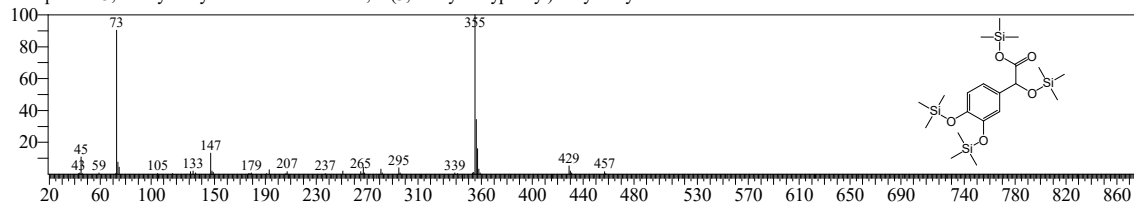

Hit#:4 Entry:343 Library:OA\_TMS\_DB5\_67min\_V3.lib

SI:43 Formula:C18H37NO3Si3 CAS:51-43-4 MolWeight:399 RetIndex:1868

CompName:Epinephrine-3TMS ; 4-[(1R)-1-hydroxy-2-(methylamino)ethyl]benzene-1,2-diol

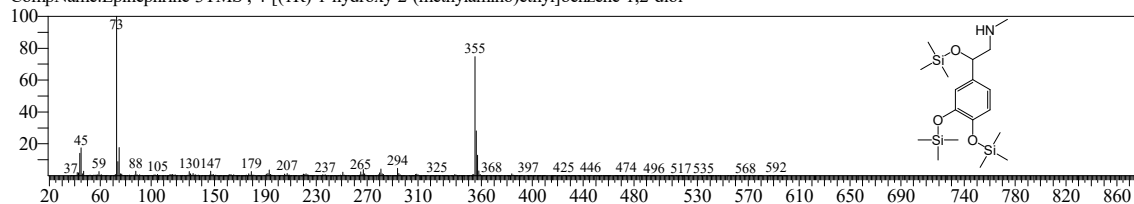

Hit#:5 Entry:328 Library:OA\_TMS\_DB5\_67min\_V3.lib

SI:37 Formula:C13H23NO2Si2 CAS:150-13-0 MolWeight:281 RetIndex:1845

CompName:4-Aminobenzoic acid-2TMS ; 4-aminobenzoic acid

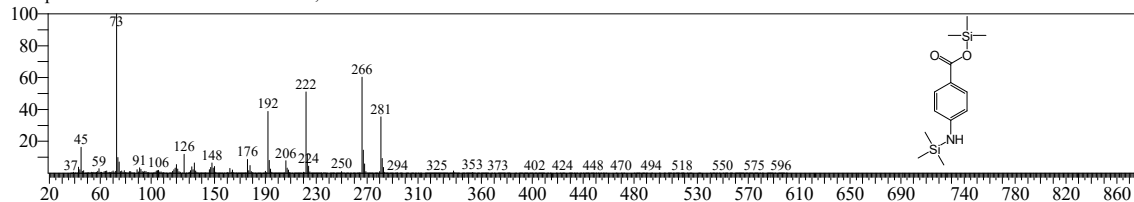

# TNAU

<< Target >>

Line#:13 R.Time:29.740(Scan#:5049) MassPeaks:298

RawMode:Averaged 29.735-29.745(5048-5050) BasePeak:73.05(1506)

BG Mode:Calc. from Peak Group 1 - Event 1 Q3 Scan

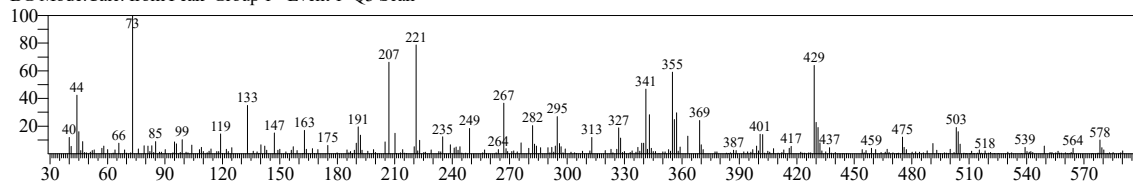

Hit#:1 Entry:402 Library:OA\_TMS\_DB5\_67min\_V3.lib

SI:49 Formula:C20H42O4Si4 CAS:775-01-9 MolWeight:458 RetIndex:1942

CompName:3,4-Dihydroxymandelic acid-4TMS ; 2-(3,4-dihydroxyphenyl)-2-hydroxyacetic acid

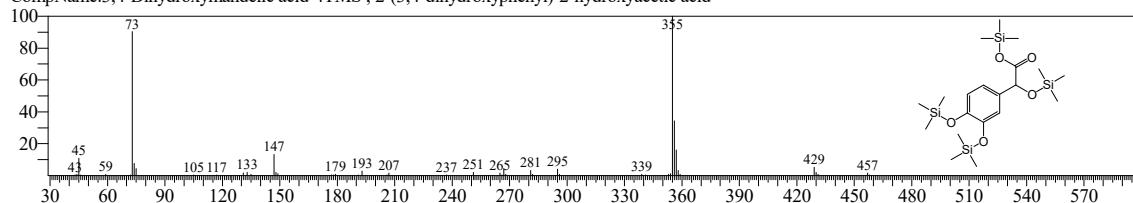

Hit#:2 Entry:343 Library:OA\_TMS\_DB5\_67min\_V3.lib

SI:44 Formula:C18H37NO3Si3 CAS:51-43-4 MolWeight:399 RetIndex:1868

CompName:Epinephrine-3TMS ; 4-[(1R)-1-hydroxy-2-(methylamino)ethyl]benzene-1,2-diol

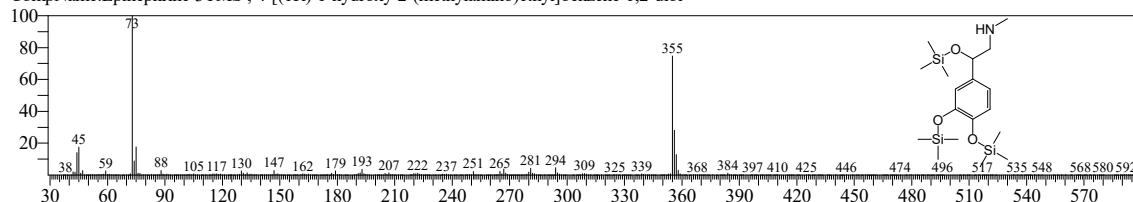

Hit#:3 Entry:3 Library:OA\_TMS\_DB5\_67min\_V3.lib

SI:34 Formula:C9H27BO3Si3 CAS:10043-35-3 MolWeight:278 RetIndex:992

CompName:Boric acid-3TMS ; boric acid

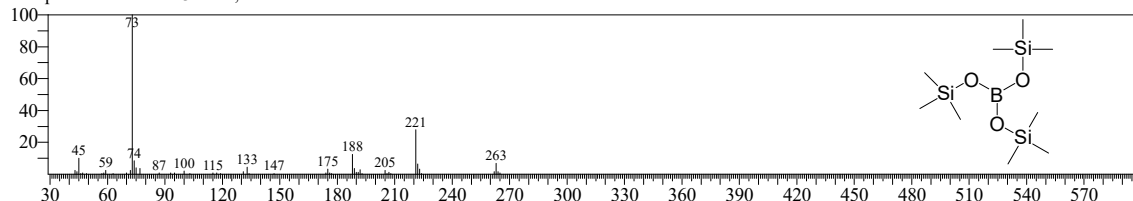

Hit#:4 Entry:211 Library:OA\_TMS\_DB5\_67min\_V3.lib

SI:33 Formula:C13H22O3Si2 CAS:99-96-7 MolWeight:282 RetIndex:1636

CompName:4-Hydroxybenzoic acid-2TMS ; 4-hydroxybenzoic acid

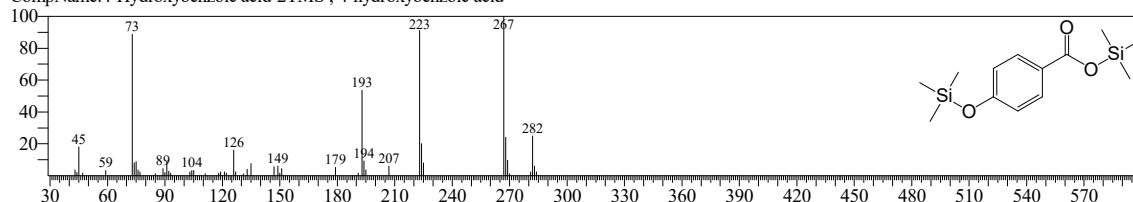

Hit#:5 Entry:384 Library:OA\_TMS\_DB5\_67min\_V3.lib

SI:33 Formula:C17H35NO3Si3 CAS:65-23-6 MolWeight:385 RetIndex:1919

CompName:Pyridoxine-3TMS ; 4,5-bis(hydroxymethyl)-2-methylpyridin-3-ol

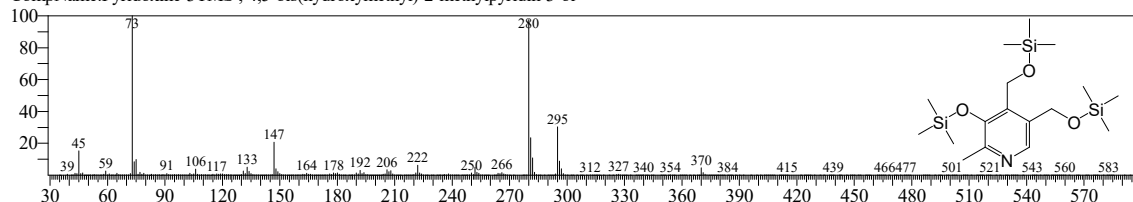

# TNAU

<< Target >>

Line#:14 R.Time:29.810(Scan#:5063) MassPeaks:292

RawMode:Averaged 29.805-29.815(5062-5064) BasePeak:73.05(876)

BG Mode:Calc. from Peak Group 1 - Event 1 Q3 Scan

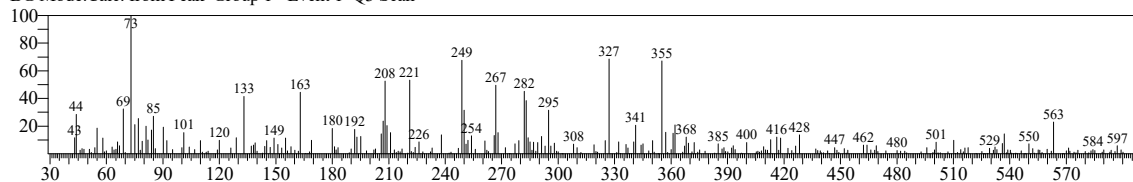

Hit#:1 Entry:343 Library:OA\_TMS\_DB5\_67min\_V3.lib

SI:37 Formula:C18H37NO3Si3 CAS:51-43-4 MolWeight:399 RetIndex:1868

CompName:Epinephrine-3TMS ; 4-[(1R)-1-hydroxy-2-(methylamino)ethyl]benzene-1,2-diol

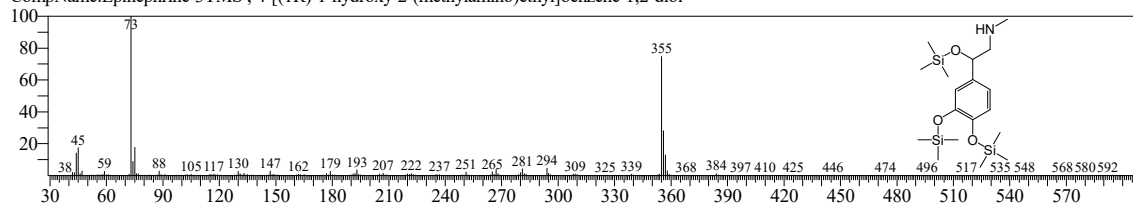

Hit#:2 Entry:438 Library:OA\_TMS\_DB5\_67min\_V3.lib

SI:35 Formula:C12H22N2O2Si2 CAS:104-98-3 MolWeight:282 RetIndex:2014

CompName:Urocanic acid-2TMS ; (E)-3-(1H-imidazol-5-yl)prop-2-enoic acid

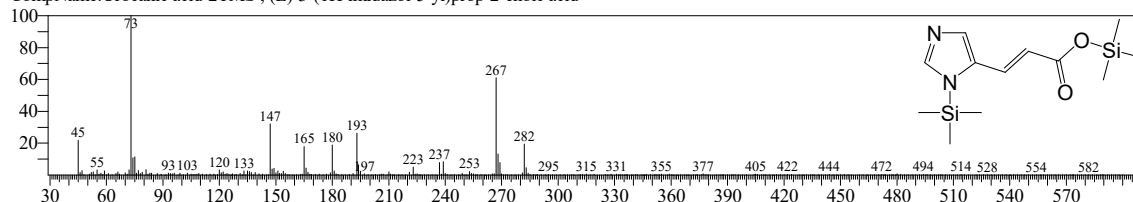

Hit#:3 Entry:294 Library:OA\_TMS\_DB5\_67min\_V3.lib

SI:35 Formula:C15H26O4Si2 CAS:306-08-1 MolWeight:326 RetIndex:1782

CompName:Homovanillic acid-2TMS ; 2-(4-hydroxy-3-methoxyphenyl)acetic acid

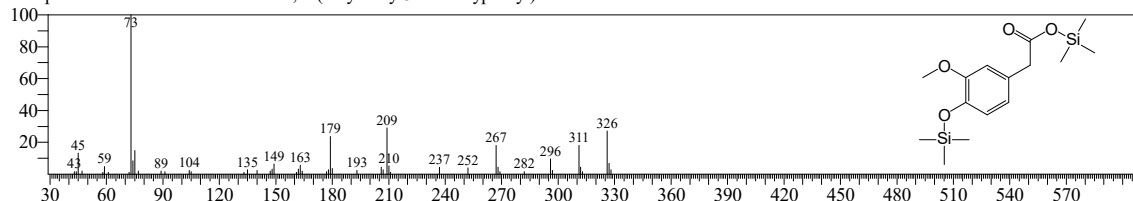

Hit#:4 Entry:402 Library:OA\_TMS\_DB5\_67min\_V3.lib

SI:35 Formula:C20H42O4Si4 CAS:775-01-9 MolWeight:458 RetIndex:1942

CompName:3,4-Dihydroxymandelic acid-4TMS ; 2-(3,4-dihydroxyphenyl)-2-hydroxyacetic acid

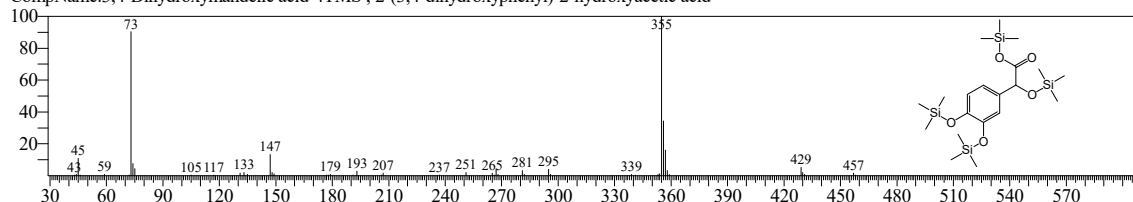

Hit#:5 Entry:211 Library:OA\_TMS\_DB5\_67min\_V3.lib

SI:34 Formula:C13H22O3Si2 CAS:99-96-7 MolWeight:282 RetIndex:1636

CompName:4-Hydroxybenzoic acid-2TMS ; 4-hydroxybenzoic acid

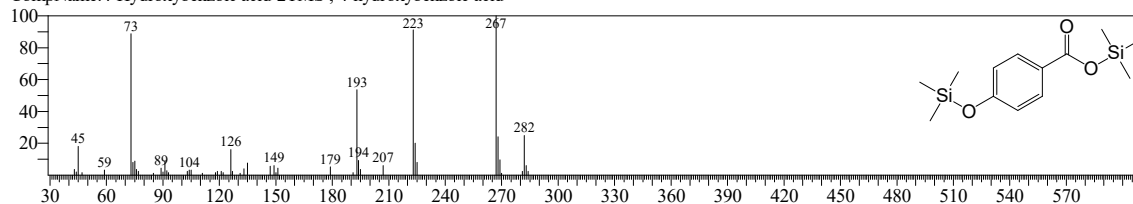



# TNAU

<< Target >>

Line#:15 R.Time:30.815(Scan#:5264) MassPeaks:285

RawMode:Averaged 30.810-30.820(5263-5265) BasePeak:207.05(1244)

BG Mode:Calc. from Peak Group 1 - Event 1 Q3 Scan

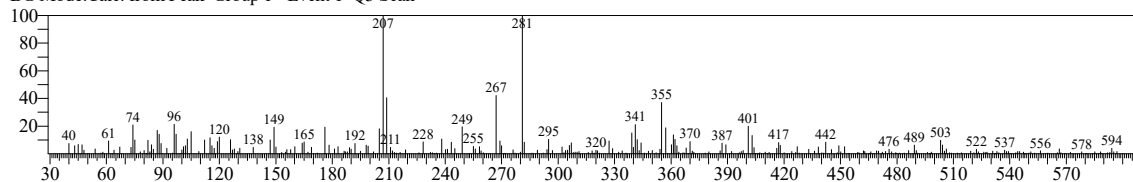

Hit#:1 Entry:402 Library:OA\_TMS\_DB5\_67min\_V3.lib

SI:33 Formula:C20H42O4Si4 CAS:775-01-9 MolWeight:458 RetIndex:1942

CompName:3,4-Dihydroxymandelic acid-4TMS ; 2-(3,4-dihydroxyphenyl)-2-hydroxyacetic acid

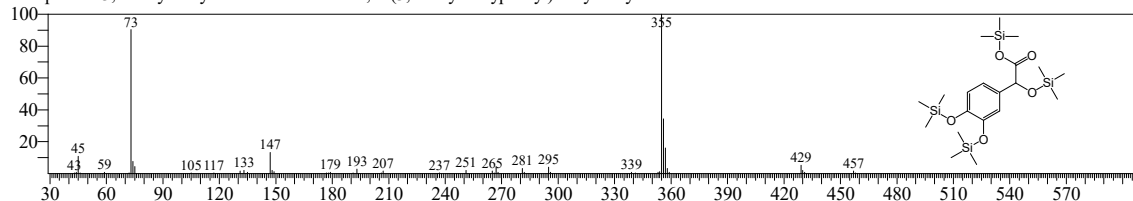

Hit#:2 Entry:211 Library:OA\_TMS\_DB5\_67min\_V3.lib

SI:28 Formula:C13H22O3Si2 CAS:99-96-7 MolWeight:282 RetIndex:1636

CompName:4-Hydroxybenzoic acid-2TMS ; 4-hydroxybenzoic acid

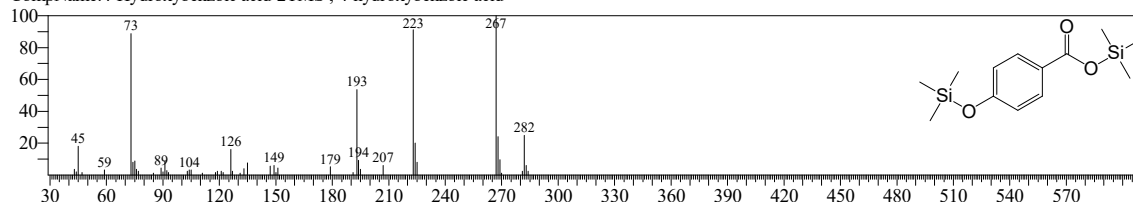

Hit#:3 Entry:179 Library:OA\_TMS\_DB5\_67min\_V3.lib

SI:27 Formula:C13H22O3Si2 CAS:99-06-9 MolWeight:282 RetIndex:1572

CompName:3-Hydroxybenzoic acid-2TMS ; 3-hydroxybenzoic acid

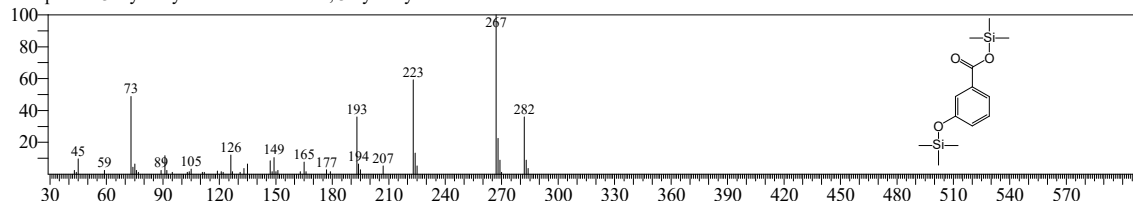

Hit#:4 Entry:341 Library:OA\_TMS\_DB5\_67min\_V3.lib

SI:27 Formula:C18H34O4Si3 CAS:3247-75-4 MolWeight:398 RetIndex:1864

CompName:3-(3-Hydroxyphenyl)-3-hydroxypropionic acid-3TMS ; 3-hydroxy-3-(3-hydroxyphenyl)propanoic acid

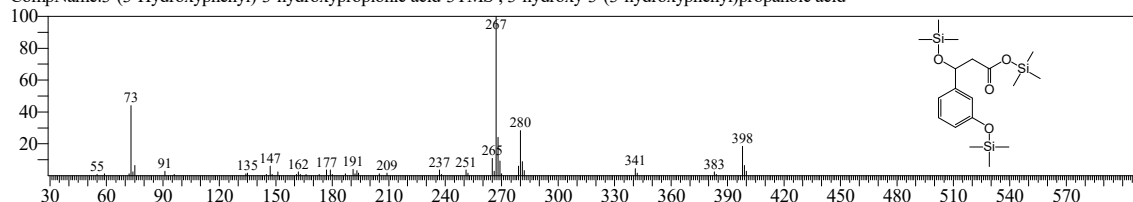

Hit#:5 Entry:539 Library:OA\_TMS\_DB5\_67min\_V3.lib

SI:27 Formula:C27H60O3Si2 CAS:544-62-7 MolWeight:488 RetIndex:2684

CompName:Batyl alcohol-2TMS ; 3-octadecoxypropane-1,2-diol

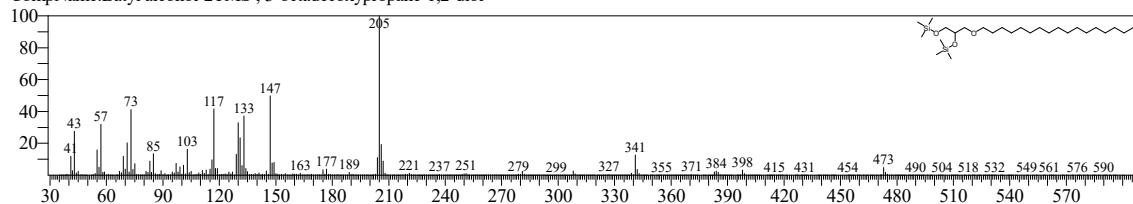

# TNAU

<< Target >>

Line#:16 R.Time:30.885(Scan#:5278) MassPeaks:268

RawMode:Averaged 30.880-30.890(5277-5279) BasePeak:207.05(1695)

BG Mode:Calc. from Peak Group 1 - Event 1 Q3 Scan

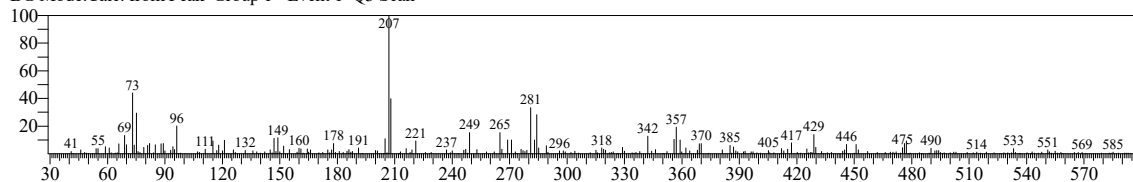

Hit#:1 Entry:343 Library:OA TMS DB5 67min\_V3.lib

SI:38 Formula:C18H37NO3Si3 CAS:51-43-4 MolWeight:399 RetIndex:1868

CompName:Epinephrine-3TMS ; 4-[(1R)-1-hydroxy-2-(methylamino)ethyl]benzene-1,2-diol

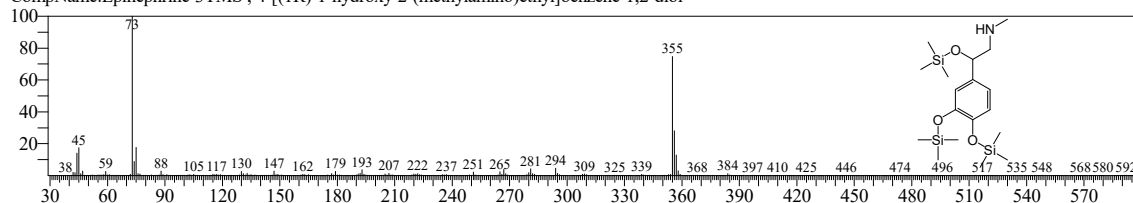

Hit#:2 Entry:337 Library:OA TMS DB5 67min\_V3.lib

SI:37 Formula:C15H40NO6PSi4 CAS:407-41-0 MolWeight:473 RetIndex:1856

CompName:O-Phospho-Serine-4TMS ; (2S)-2-azaniumyl-3-phosphonatoxypropanoate

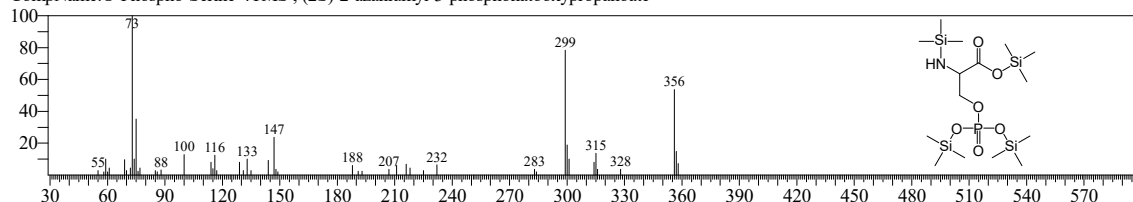

Hit#:3 Entry:528 Library:OA TMS DB5 67min\_V3.lib

SI:37 Formula:C17H28Cl2N2O5Si2 CAS:56-75-7 MolWeight:466 RetIndex:2508

CompName:Chloramphenicol-2TMS ; 2,2-dichloro-N-[(1R,2R)-1,3-dihydroxy-1-(4-nitrophenyl)propan-2-yl]acetamide

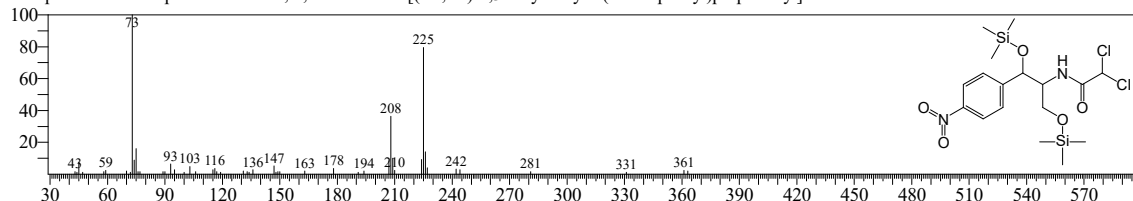

Hit#:4 Entry:13 Library:OA TMS DB5 67min\_V3.lib

SI:37 Formula:C8H20O3Si2 CAS:79-14-1 MolWeight:220 RetIndex:1074

CompName:Glycolic acid-2TMS ; 2-hydroxyacetic acid

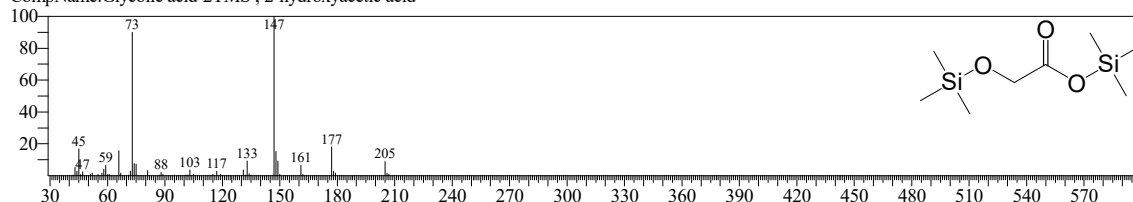

Hit#:5 Entry:310 Library:OA TMS DB5 67min\_V3.lib

SI:36 Formula:C11H20N4OSi2 CAS:68-94-0 MolWeight:280 RetIndex:1822

CompName:Hypoxanthine-2TMS ; 3,7-dihydropurin-6-one

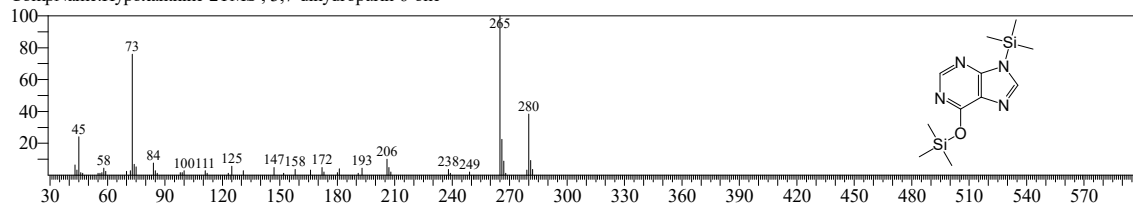

<< Target >>

Line#:17 R.Time:30.955(Scan#:5292) MassPeaks:307

RawMode:Averaged 30.950-30.960(5291-5293) BasePeak:281.05(2019)

BG Mode:Calc. from Peak Group 1 - Event 1 Q3 Scan

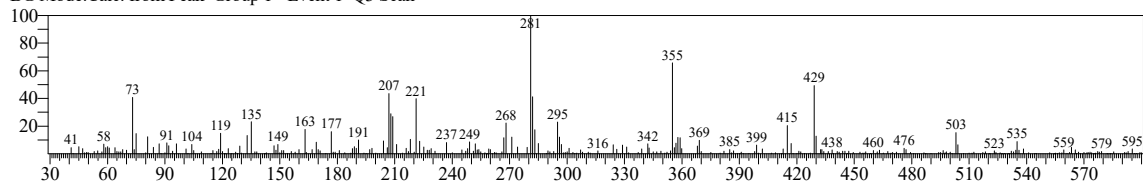

Hit#:1 Entry:402 Library:OA\_TMS\_DB5\_67min\_V3.lib

SI:45 Formula:C20H42O4Si4 CAS:775-01-9 MolWeight:458 RetIndex:1942

CompName:3,4-Dihydroxymandelic acid-4TMS ; 2-(3,4-dihydroxyphenyl)-2-hydroxyacetic acid

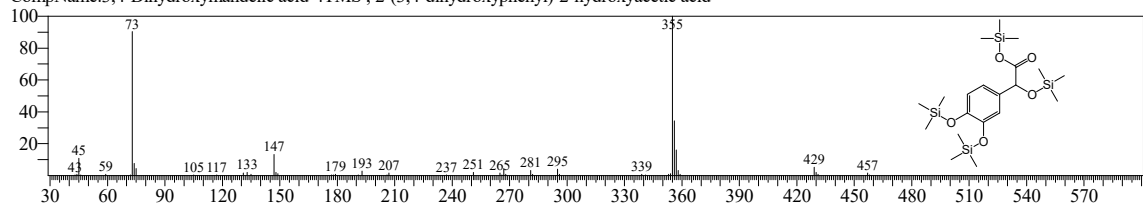

Hit#:2 Entry:343 Library:OA\_TMS\_DB5\_67min\_V3.lib

SI:40 Formula:C18H37NO3Si3 CAS:51-43-4 MolWeight:399 RetIndex:1868

CompName:Epinephrine-3TMS ; 4-[(1R)-1-hydroxy-2-(methylamino)ethyl]benzene-1,2-diol

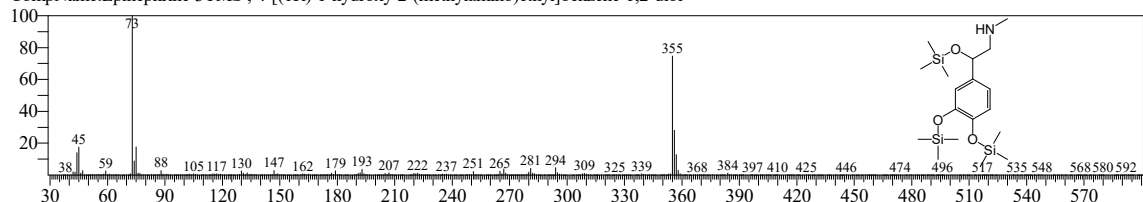

Hit#:3 Entry:211 Library:OA\_TMS\_DB5\_67min\_V3.lib

SI:37 Formula:C13H22O3Si2 CAS:99-96-7 MolWeight:282 RetIndex:1636

CompName:4-Hydroxybenzoic acid-2TMS ; 4-hydroxybenzoic acid

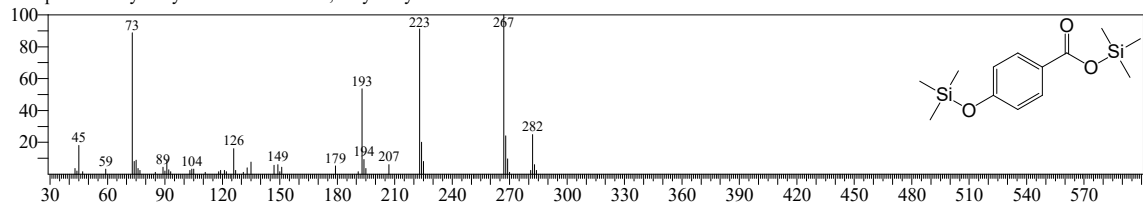

Hit#:4 Entry:179 Library:OA\_TMS\_DB5\_67min\_V3.lib

SI:36 Formula:C13H22O3Si2 CAS:99-06-9 MolWeight:282 RetIndex:1572

CompName:3-Hydroxybenzoic acid-2TMS ; 3-hydroxybenzoic acid

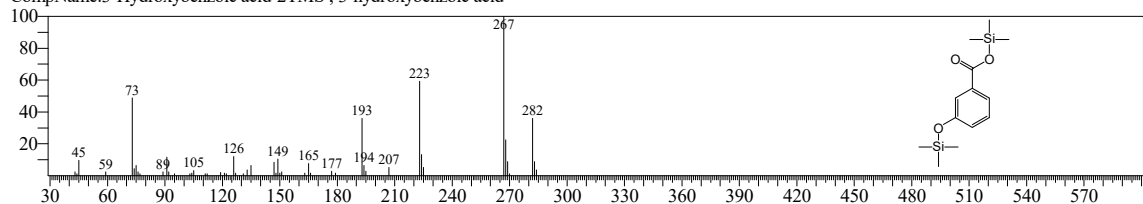

Hit#:5 Entry:384 Library:OA\_TMS\_DB5\_67min\_V3.lib

SI:35 Formula:C17H35NO3Si3 CAS:65-23-6 MolWeight:385 RetIndex:1919

CompName:Pyridoxine-3TMS ; 4,5-bis(hydroxymethyl)-2-methylpyridin-3-ol

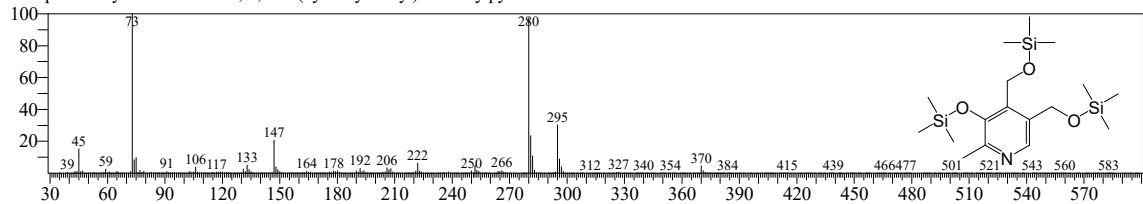

# TNAU

<< Target >>

Line#:18 R.Time:31.820(Scan#:5465) MassPeaks:292

RawMode:Averaged 31.815-31.825(5464-5466) BasePeak:281.00(1243)

BG Mode:Calc. from Peak Group 1 - Event 1 Q3 Scan

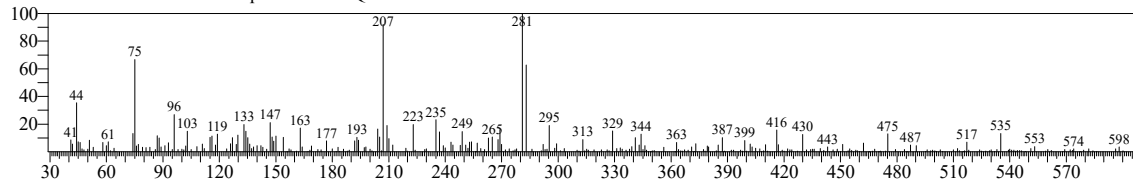

Hit#:1 Entry:539 Library:OA\_TMS\_DB5\_67min\_V3.lib

SI:33 Formula:C27H60O3Si2 CAS:544-62-7 MolWeight:488 RetIndex:2684

CompName:Batyl alcohol-2TMS ; 3-octadecoxypropane-1,2-diol

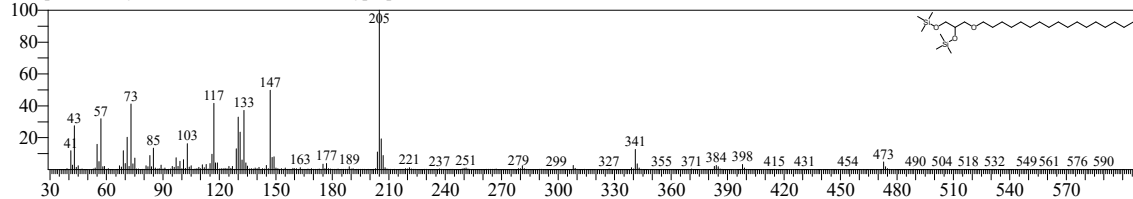

Hit#:2 Entry:315 Library:OA\_TMS\_DB5\_67min\_V3.lib

SI:29 Formula:C16H30O4Si3 CAS:99-50-3 MolWeight:370 RetIndex:1833

CompName:Protocatechuic acid-3TMS ; 3,4-dihydroxybenzoic acid

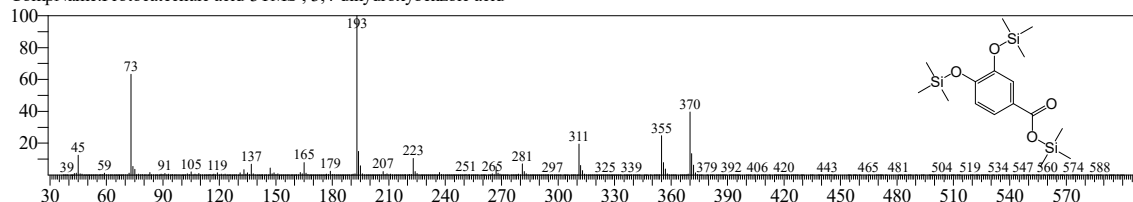

Hit#:3 Entry:219 Library:OA\_TMS\_DB5\_67min\_V3.lib

SI:27 Formula:C18H44O5Si4 CAS:10485-94-6 MolWeight:452 RetIndex:1646

CompName:Rhamnose-4TMS(1) ; (2R,3R,4S,5S)-2,3,4,5-tetrahydroxyhexanal

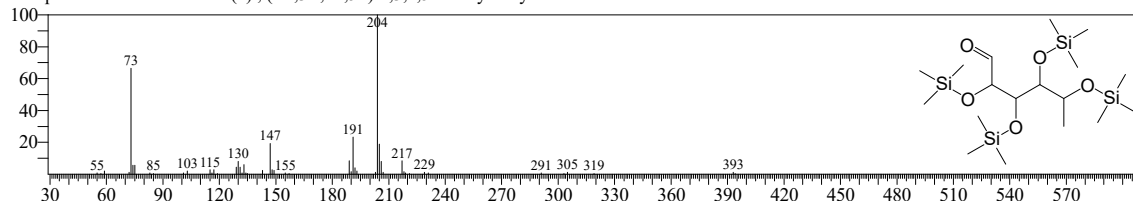

Hit#:4 Entry:431 Library:OA\_TMS\_DB5\_67min\_V3.lib

SI:27 Formula:C21H45NO3Si4 CAS:51-43-4 MolWeight:471 RetIndex:1989

CompName:Epinephrine-4TMS ; 4-[(1R)-1-hydroxy-2-(methylamino)ethyl]benzene-1,2-diol

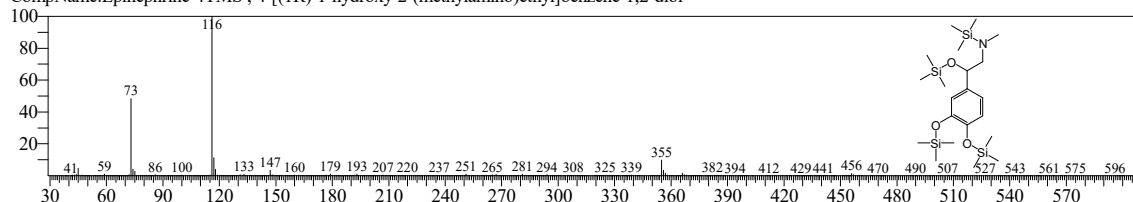

Hit#:5 Entry:35 Library:OA\_TMS\_DB5\_67min\_V3.lib

SI:27 Formula:C10H24O3Si2 CAS:300-85-6 MolWeight:248 RetIndex:1161

CompName:3-Hydroxybutyric acid-2TMS ; 3-hydroxybutanoic acid

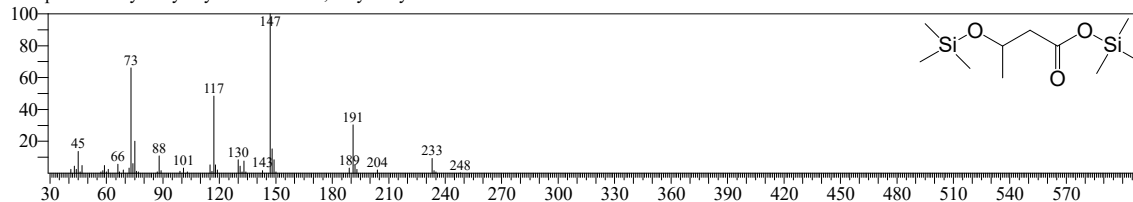

# TNAU

<< Target >>

Line#:19 R.Time:31.910(Scan#:5483) MassPeaks:317

RawMode:Averaged 31.905-31.915(5482-5484) BasePeak:139.15(1601)

BG Mode:Calc. from Peak Group 1 - Event 1 Q3 Scan

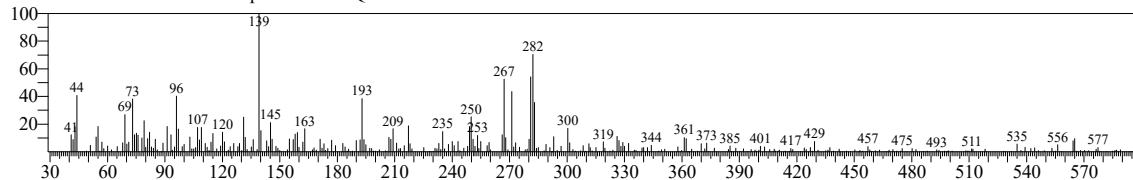

Hit#:1 Entry:211 Library:OA\_TMS\_DB5\_67min\_V3.lib

SI:37 Formula:C<sub>13</sub>H<sub>22</sub>O<sub>3</sub>Si<sub>2</sub> CAS:99-96-7 MolWeight:282 RetIndex:1636

CompName:4-Hydroxybenzoic acid-2TMS ; 4-hydroxybenzoic acid

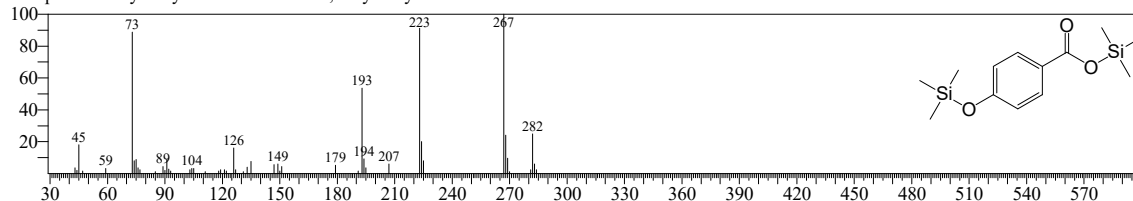

Hit#:2 Entry:179 Library:OA\_TMS\_DB5\_67min\_V3.lib

SI:36 Formula:C<sub>13</sub>H<sub>22</sub>O<sub>3</sub>Si<sub>2</sub> CAS:99-06-9 MolWeight:282 RetIndex:1572

CompName:3-Hydroxybenzoic acid-2TMS ; 3-hydroxybenzoic acid

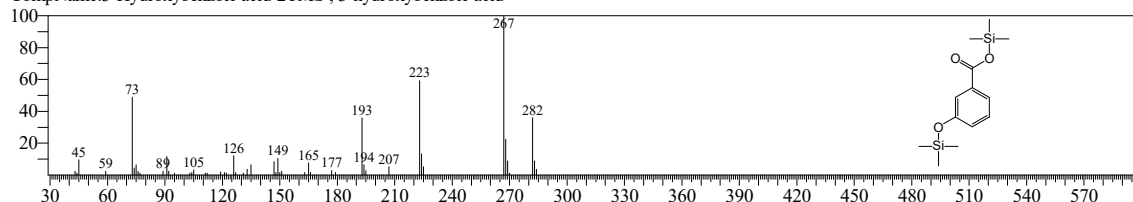

Hit#:3 Entry:438 Library:OA\_TMS\_DB5\_67min\_V3.lib

SI:36 Formula:C<sub>12</sub>H<sub>22</sub>N<sub>2</sub>O<sub>2</sub>Si<sub>2</sub> CAS:104-98-3 MolWeight:282 RetIndex:2014

CompName:Urocanic acid-2TMS ; (E)-3-(1H-imidazol-5-yl)prop-2-enoic acid

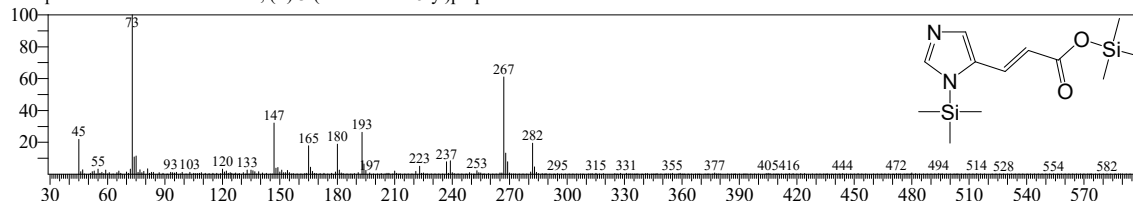

Hit#:4 Entry:328 Library:OA\_TMS\_DB5\_67min\_V3.lib

SI:35 Formula:C<sub>13</sub>H<sub>23</sub>NO<sub>2</sub>Si<sub>2</sub> CAS:150-13-0 MolWeight:281 RetIndex:1845

CompName:4-Aminobenzoic acid-2TMS ; 4-aminobenzoic acid

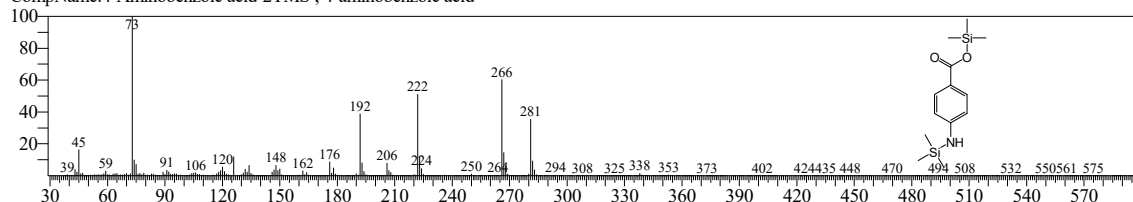

Hit#:5 Entry:508 Library:OA\_TMS\_DB5\_67min\_V3.lib

SI:34 Formula:C<sub>23</sub>H<sub>40</sub>O<sub>2</sub>Si CAS:506-32-1 MolWeight:376 RetIndex:2381

CompName:Arachidonic acid-TMS ; (5Z,8Z,11Z,14Z)-icosa-5,8,11,14-tetraenoic acid

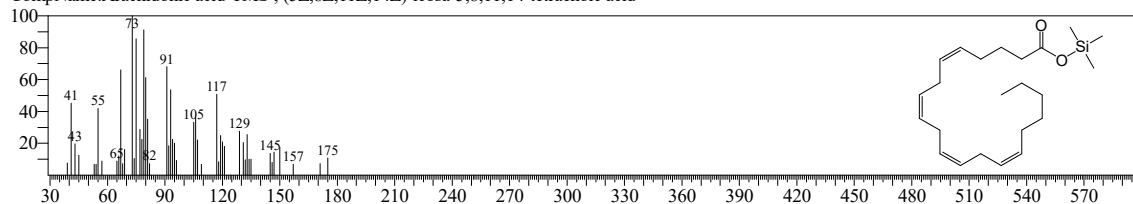

# TNAU

<< Target >>

Line#:20 R.Time:32.345(Scan#:5570) MassPeaks:293

RawMode:Averaged 32.340-32.350(5569-5571) BasePeak:281.05(947)

BG Mode:Calc. from Peak Group 1 - Event 1 Q3 Scan

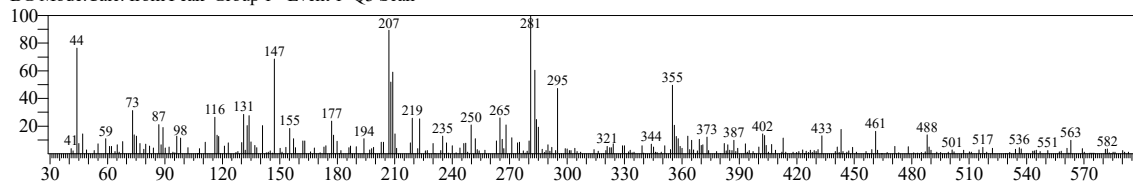

Hit#:1 Entry:343 Library:OA TMS DB5\_67min\_V3.lib

SI:39 Formula:C18H37NO3Si3 CAS:51-43-4 MolWeight:399 RetIndex:1868

CompName:Epinephrine-3TMS ; 4-[(1R)-1-hydroxy-2-(methylamino)ethyl]benzene-1,2-diol



Hit#:2 Entry:402 Library:OA TMS DB5\_67min\_V3.lib

SI:39 Formula:C20H42O4Si4 CAS:775-01-9 MolWeight:458 RetIndex:1942

CompName:3,4-Dihydroxymandelic acid-4TMS ; 2-(3,4-dihydroxyphenyl)-2-hydroxyacetic acid

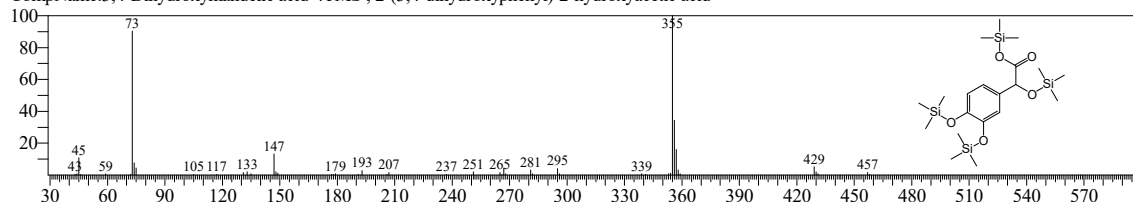

Hit#:3 Entry:384 Library:OA TMS DB5\_67min\_V3.lib

SI:36 Formula:C17H35NO3Si3 CAS:65-23-6 MolWeight:385 RetIndex:1919

CompName:Pyridoxine-3TMS ; 4,5-bis(hydroxymethyl)-2-methylpyridin-3-ol

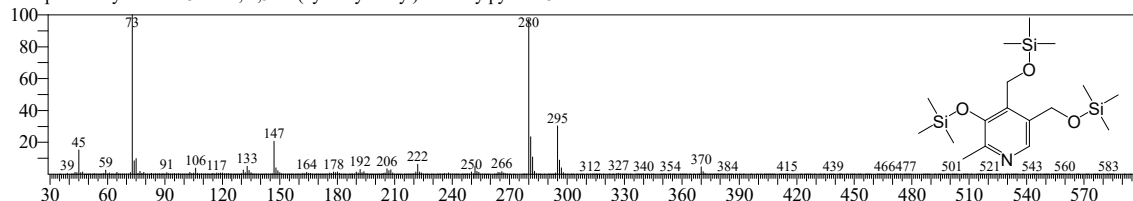

Hit#:4 Entry:528 Library:OA TMS DB5\_67min\_V3.lib

SI:35 Formula:C17H28Cl2N2O5Si2 CAS:56-75-7 MolWeight:466 RetIndex:2508

CompName:Chloramphenicol-2TMS ; 2,2-dichloro-N-[(1R,2R)-1,3-dihydroxy-1-(4-nitrophenyl)propan-2-yl]acetamide

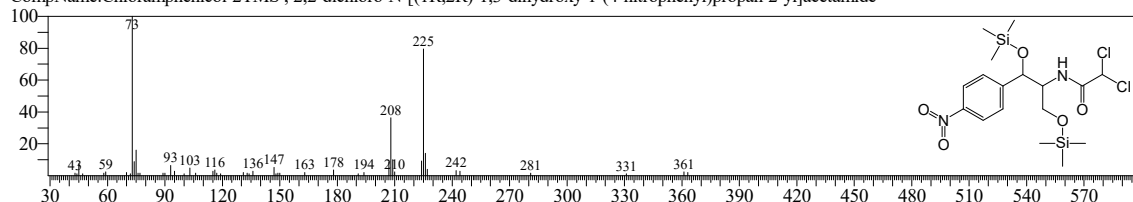

Hit#:5 Entry:328 Library:OA TMS DB5\_67min\_V3.lib

SI:33 Formula:C13H23NO2Si2 CAS:150-13-0 MolWeight:281 RetIndex:1845

CompName:4-Aminobenzoic acid-2TMS ; 4-aminobenzoic acid

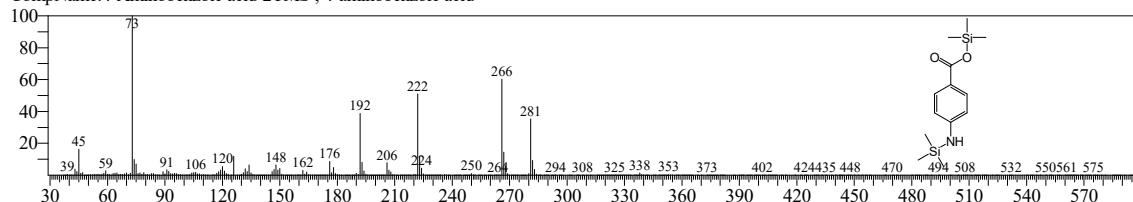

# TNAU

<< Target >>

Line#:21 R.Time:32.445(Scan#:5590) MassPeaks:333

RawMode:Averaged 32.440-32.450(5589-5591) BasePeak:281.05(1138)

BG Mode:Calc. from Peak Group 1 - Event 1 Q3 Scan

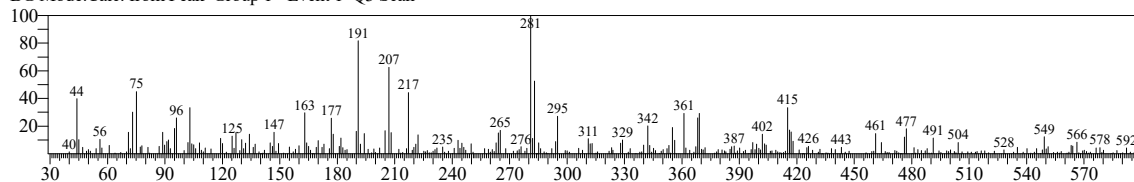

Hit#:1 Entry:384 Library:OA\_TMS\_DB5\_67min\_V3.lib

SI:34 Formula:C17H35NO3Si3 CAS:65-23-6 MolWeight:385 RetIndex:1919

CompName:Pyridoxine-3TMS ; 4,5-bis(hydroxymethyl)-2-methylpyridin-3-ol

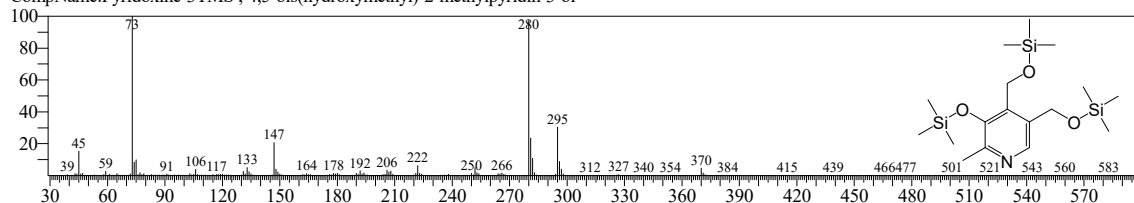

Hit#:2 Entry:77 Library:OA\_TMS\_DB5\_67min\_V3.lib

SI:33 Formula:C12H32O3Si3 CAS:56-81-5 MolWeight:308 RetIndex:1279

CompName:Glycerol-3TMS ; propane-1,2,3-triol

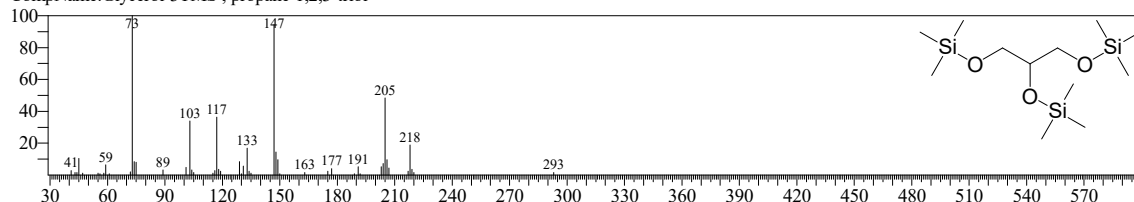

Hit#:3 Entry:343 Library:OA\_TMS\_DB5\_67min\_V3.lib

SI:33 Formula:C18H37NO3Si3 CAS:51-43-4 MolWeight:399 RetIndex:1868

CompName:Epinephrine-3TMS ; 4-[(1R)-1-hydroxy-2-(methylamino)ethyl]benzene-1,2-diol

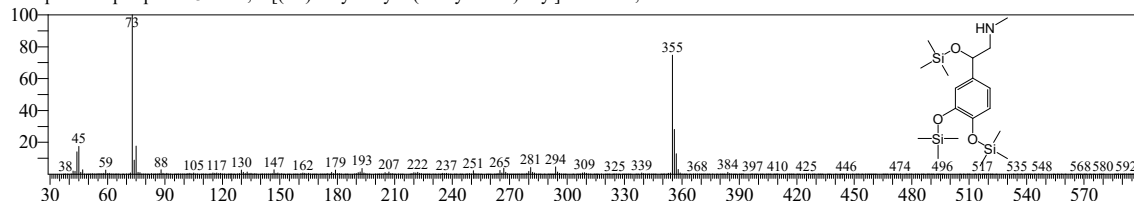

Hit#:4 Entry:528 Library:OA\_TMS\_DB5\_67min\_V3.lib

SI:32 Formula:C17H28Cl2N2O5Si2 CAS:56-75-7 MolWeight:466 RetIndex:2508

CompName:Chloramphenicol-2TMS ; 2,2-dichloro-N-[(1R,2R)-1,3-dihydroxy-1-(4-nitrophenyl)propan-2-yl]acetamide

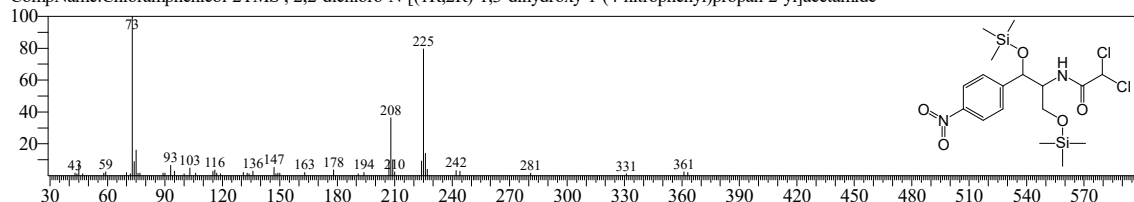

Hit#:5 Entry:210 Library:OA\_TMS\_DB5\_67min\_V3.lib

SI:32 Formula:C17H42O5Si4 CAS:10323-20-3 MolWeight:438 RetIndex:1634

CompName:Arabinose-4TMS(1) ; (2S,3R,4R)-2,3,4,5-tetrahydroxypentanal

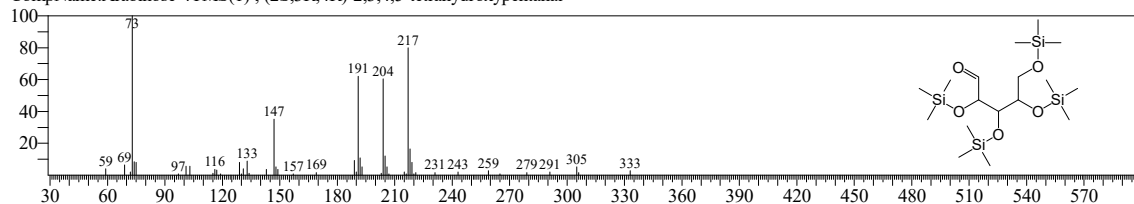

# TNAU

<< Target >>

Line#:22 R.Time:32.485(Scan#:5598) MassPeaks:293

RawMode:Averaged 32.480-32.490(5597-5599) BasePeak:73.05(1452)

BG Mode:Calc. from Peak Group 1 - Event 1 Q3 Scan

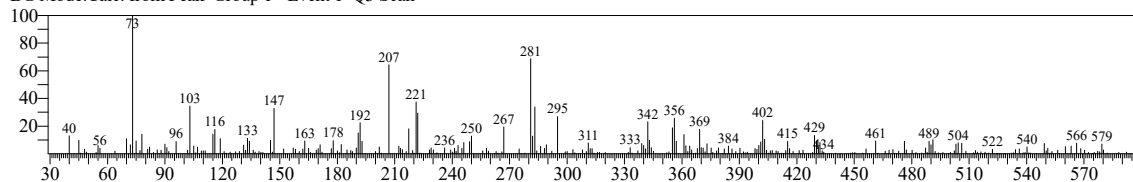

Hit#:1 Entry:402 Library:OA\_TMS\_DB5\_67min\_V3.lib

SI:45 Formula:C20H42O4Si4 CAS:775-01-9 MolWeight:458 RetIndex:1942

CompName:3,4-Dihydroxymandelic acid-4TMS ; 2-(3,4-dihydroxyphenyl)-2-hydroxyacetic acid



Hit#:2 Entry:343 Library:OA\_TMS\_DB5\_67min\_V3.lib

SI:45 Formula:C18H37NO3Si3 CAS:51-43-4 MolWeight:399 RetIndex:1868

CompName:Epinephrine-3TMS ; 4-[(1R)-1-hydroxy-2-(methylamino)ethyl]benzene-1,2-diol



Hit#:3 Entry:328 Library:OA\_TMS\_DB5\_67min\_V3.lib

SI:45 Formula:C13H23NO2Si2 CAS:150-13-0 MolWeight:281 RetIndex:1845

CompName:4-Aminobenzoic acid-2TMS ; 4-aminobenzoic acid

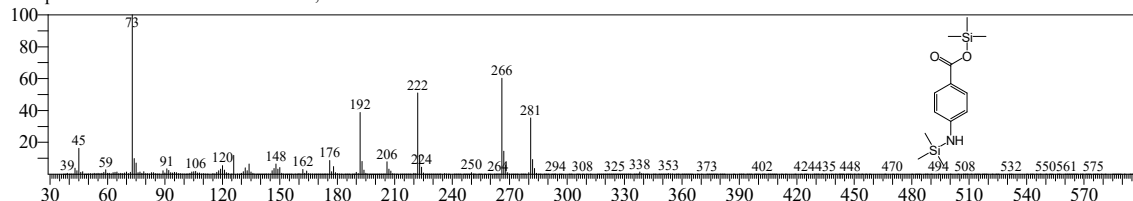

Hit#:4 Entry:384 Library:OA\_TMS\_DB5\_67min\_V3.lib

SI:45 Formula:C17H35NO3Si3 CAS:65-23-6 MolWeight:385 RetIndex:1919

CompName:Pyridoxine-3TMS ; 4,5-bis(hydroxymethyl)-2-methylpyridin-3-ol

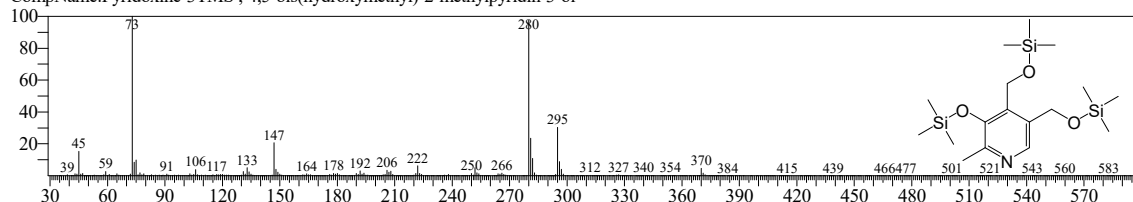

Hit#:5 Entry:194 Library:OA\_TMS\_DB5\_67min\_V3.lib

SI:41 Formula:C15H26O3Si2 CAS:828-01-3 MolWeight:310 RetIndex:1599

CompName:3-Phenyllactic acid-2TMS ; 2-hydroxy-3-phenylpropanoic acid

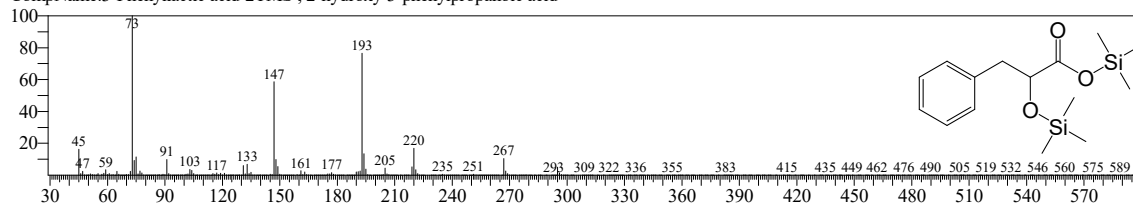



# TNAU

<< Target >>

Line#:23 R.Time:32.645(Scan#:5630) MassPeaks:289

RawMode:Averaged 32.640-32.650(5629-5631) BasePeak:221.10(773)

BG Mode:Calc. from Peak Group 1 - Event 1 Q3 Scan

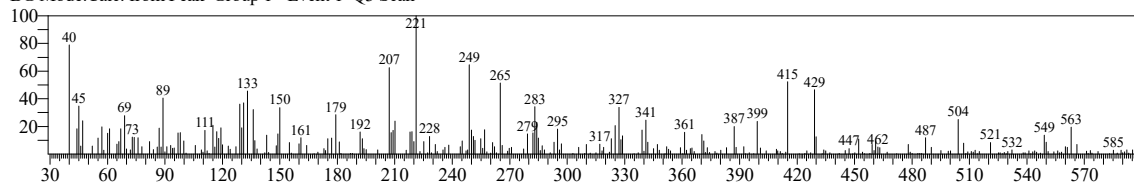

Hit#:1 Entry:491 Library:OA TMS DB5 67min V3.lib

SI:25 Formula:C21H44O2Si CAS:57-11-4 MolWeight:356 RetIndex:2244

CompName:Stearic acid-TMS ; octadecanoic acid

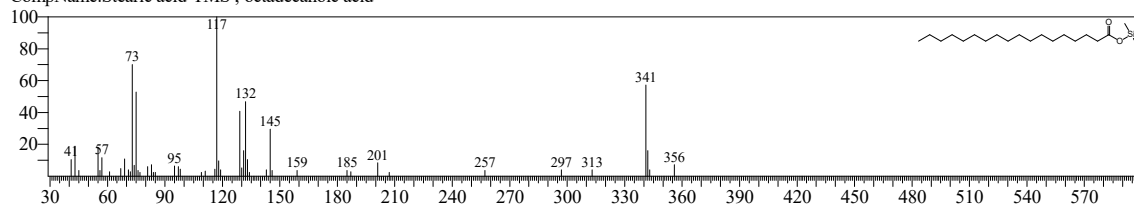

Hit#:2 Entry:100 Library:OA TMS DB5 67min V3.lib

SI:25 Formula:CAS:0-00-0 MolWeight:264 RetIndex:1346

CompName:Fumaric acid-13C4-2TMS ;

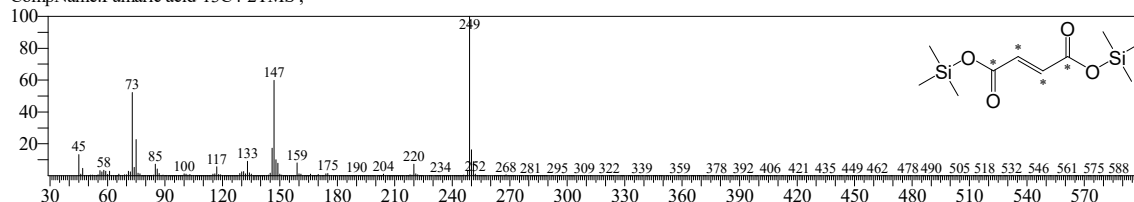

Hit#:3 Entry:223 Library:OA TMS DB5 67min V3.lib

SI:23 Formula:C15H32O2Si CAS:143-07-7 MolWeight:272 RetIndex:1653

CompName:Lauric acid-TMS ; dodecanoic acid

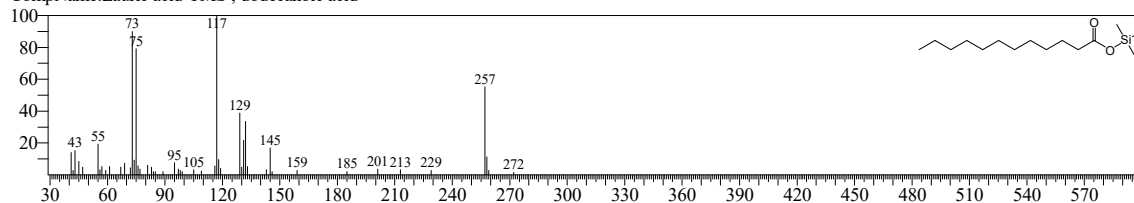

Hit#:4 Entry:413 Library:OA TMS DB5 67min V3.lib

SI:23 Formula:C18H35NO3Si3 CAS:60-18-4 MolWeight:397 RetIndex:1958

CompName:Tyrosine-3TMS ; (2S)-2-amino-3-(4-hydroxyphenyl)propanoic acid

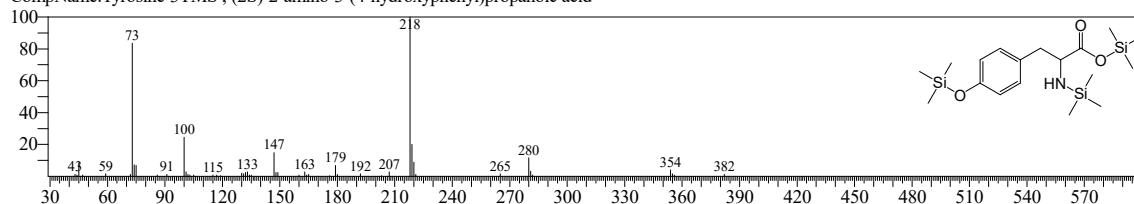

Hit#:5 Entry:487 Library:OA TMS DB5 67min V3.lib

SI:22 Formula:C21H42O2Si CAS:112-79-8 MolWeight:354 RetIndex:2227

CompName:Elaidic acid-TMS ; (E)-octadec-9-enoic acid

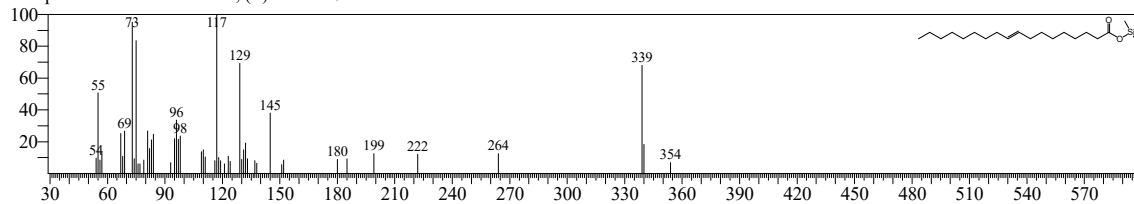

Supplement: Supplementary file 32 [file supplementary]
