# Supplementary material for: Comparative Metabolomics Profiling Reveals Key Metabolites and Associated Pathways Regulating Tuber Dormancy in White Yam (<em>Dioscorea rotundata</em>)
Source: Preprints.org preprint supplement (doi:10.20944/preprints202303.0378.v1), 2023-03-21

# TNAU

## Sample Information

Analyzed by : Admin  
 Analyzed : 02-Sep-22 12:36:36 AM  
 Sample Type : Unknown  
 Level # : 1  
 Sample Name : Sample  
 Sample ID : 3-2  
 IS Amount : [1]=1  
 Sample Amount : 1  
 Dilution Factor : 1  
 Vial # : 4  
 Injection Volume : 2.00  
 Data File : D:\GCMS-8040NX\Sep 2022\Users\01.09.2022\01092022009.qgd  
 Org Data File : D:\GCMS-8040NX\Sep 2022\Users\01.09.2022\01092022009.qgd  
 Method File : D:\GCMS-8040NX\Sep 2022\Method\Scan\_methodfile.qgm  
 Org Method File : D:\GCMS-8040NX\Sep 2022\Method\Scan\_methodfile.qgm  
 Report File :  
 Tuning File : D:\GCMS-8040NX\Aug 2022\Tuning Data\TUNING 25082022.qgt  
 Modified by : Admin  
 Modified : 05-Sep-22 10:58:38 AM

Chromatogram Sample D:\GCMS-8040NX\Sep 2022\Users\01.09.2022\01092022009.qgd

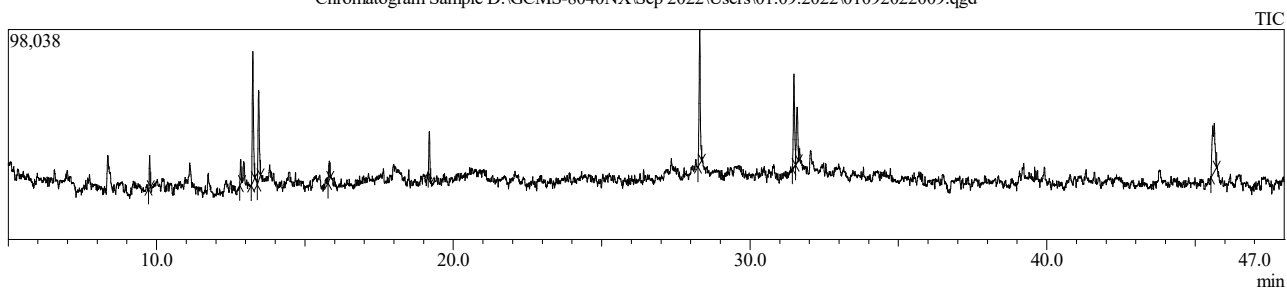

Peak Report TIC

| Peak# | R.Time | Area   | Area%  | Height | Height% | A/H  | Similarity | Name                                    |
|-------|--------|--------|--------|--------|---------|------|------------|-----------------------------------------|
| 1     | 9.768  | 27252  | 2.80   | 15142  | 4.81    | 1.80 | 93         | Pentasiloxane, dodecamethyl-            |
| 2     | 12.833 | 25417  | 2.61   | 11362  | 3.61    | 2.24 | 35         | Nicotinic acid-TMS                      |
| 3     | 13.243 | 172879 | 17.78  | 61164  | 19.44   | 2.83 | 54         | Methyl cis-13,16-Docosadienate          |
| 4     | 13.438 | 124042 | 12.76  | 42185  | 13.41   | 2.94 | 52         | Methyl cis-13,16-Docosadienate          |
| 5     | 15.823 | 22135  | 2.28   | 8765   | 2.79    | 2.53 | 72         | Malic acid 1-ethyl ester, 2TMS          |
| 6     | 19.194 | 50632  | 5.21   | 21565  | 6.85    | 2.35 | 93         | 2,4-Di-tert-butylphenoxytrimethylsilane |
| 7     | 28.304 | 178248 | 18.33  | 62601  | 19.90   | 2.85 | 95         | n-Hexadecanoic acid                     |
| 8     | 31.480 | 133315 | 13.71  | 43346  | 13.78   | 3.08 | 95         | 10E,12Z-Octadecadienoic acid            |
| 9     | 31.587 | 91264  | 9.39   | 26096  | 8.29    | 3.50 | 86         | 7-Tetradecenal, (Z)-                    |
| 10    | 45.643 | 147079 | 15.13  | 22425  | 7.13    | 6.56 | 89         | Diosgenin                               |
|       |        | 972263 | 100.00 | 314651 | 100.00  |      |            |                                         |

Library

# TNAU

<< Target >>

Line#:1 R.Time:9.770(Scan#:955) MassPeaks:346  
RawMode:Averaged 9.765-9.775(954-956) BasePeak:281.05(3290)  
BG Mode:Calc. from Peak Group 1 - Event 1 Q3 Scan

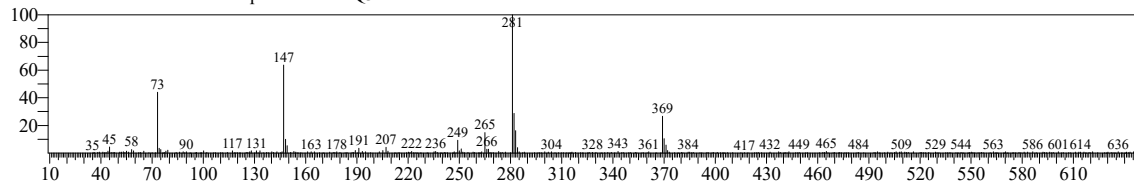

Hit#:1 Entry:40975 Library:NIST20R.lib

SI:93 Formula:C<sub>12</sub>H<sub>36</sub>O<sub>4</sub>Si<sub>5</sub> CAS:141-63-9 MolWeight:384 RetIndex:1068

CompName:Pentasiloxane, dodecamethyl- \$\$ Dodecamethylpentasiloxane \$\$ 1,1,1,3,3,5,5,7,7,9,9-Dodecamethylpentasiloxane #

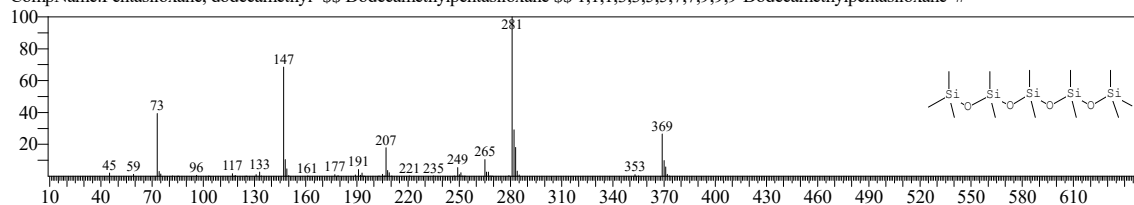

Hit#:2 Entry:249272 Library:NIST20M1.lib

SI:82 Formula:C<sub>12</sub>H<sub>36</sub>O<sub>4</sub>Si<sub>5</sub> CAS:3555-47-3 MolWeight:384 RetIndex:1068

CompName:Trisiloxane, 1,1,1,5,5,5-hexamethyl-3,3-bis[(trimethylsilyl)oxy]- \$\$ Tetrakis(trimethylsiloxy)silane \$\$ Trisiloxane, 1,1,1,5,5,5-hexamethyl-3,3-b

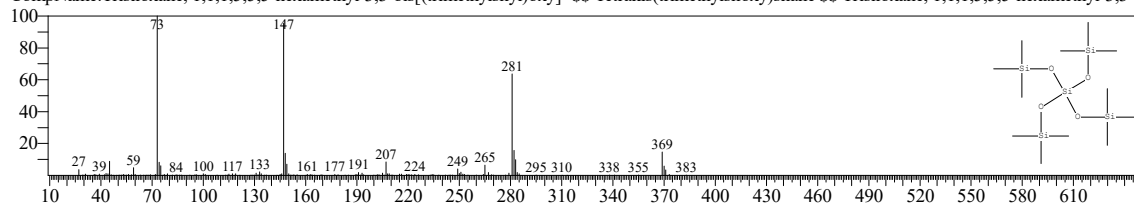

Hit#:3 Entry:27848 Library:NIST20M2.lib

SI:80 Formula:C<sub>18</sub>H<sub>48</sub>O<sub>4</sub>Si<sub>5</sub> CAS:0-00-0 MolWeight:468 RetIndex:1495

CompName:1,3,5,7,9-Pentasiloxane, 1,1,3,3,5,5,7,7,9,9-decamethyl-1,9-di(tert.butyl)-

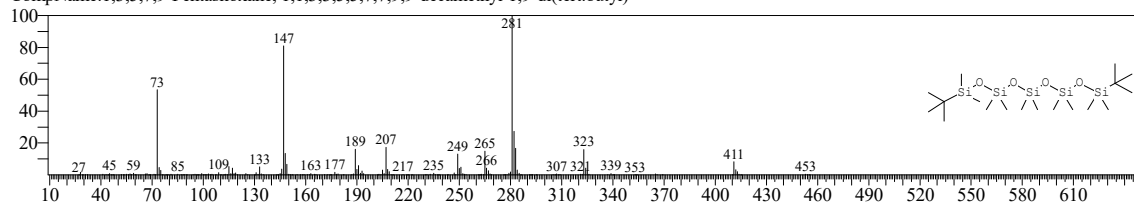

Hit#:4 Entry:249271 Library:NIST20M1.lib

SI:78 Formula:C<sub>12</sub>H<sub>36</sub>O<sub>4</sub>Si<sub>5</sub> CAS:38146-99-5 MolWeight:384 RetIndex:1068

CompName:1,1,1,3,3,5,5,7,7-Nonamethyl-3-(trimethylsiloxy)tetrasiloxane \$\$ 1,1,1,3,3,5,5,7,7-Nonamethyl-5-[(trimethylsilyl)oxy]tetrasiloxane #

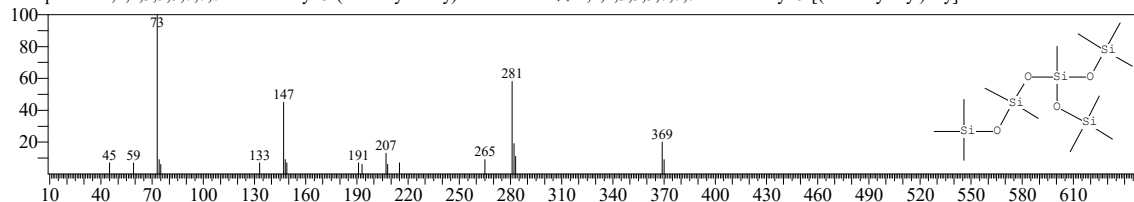

Hit#:5 Entry:158097 Library:NIST20M1.lib

SI:75 Formula:C<sub>14</sub>H<sub>24</sub>O<sub>3</sub>Si<sub>2</sub> CAS:0-00-0 MolWeight:296 RetIndex:1625

CompName:2,6-Dihydroxyacetophenone, 2TMS derivative \$\$ 2',6'-Dihydroxyacetophenone, bis(trimethylsilyl) ether

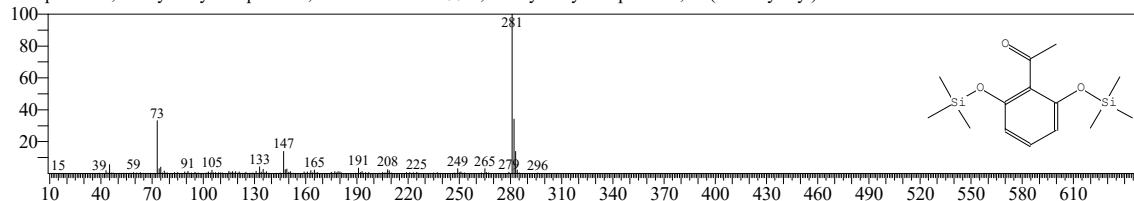

# TNAU

<< Target >>

Line#:2 R.Time:12.835(Scan#:1568) MassPeaks:422

RawMode:Averaged 12.830-12.840(1567-1569) BasePeak:138.05(2253)

BG Mode:Calc. from Peak Group 1 - Event 1 Q3 Scan

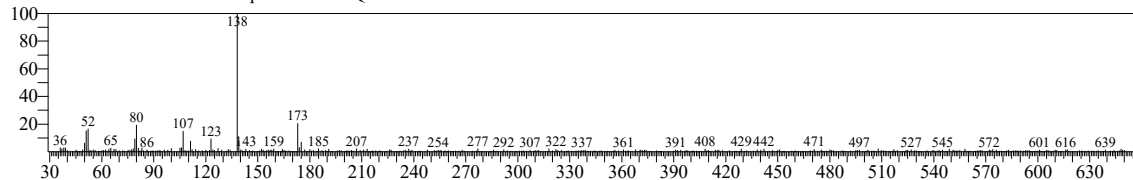

Hit#:1 Entry:84 Library:OA\_TMS\_DB5\_67min\_V3.lib

SI:35 Formula:C9H13NO2Si CAS:59-67-6 MolWeight:195 RetIndex:1300

CompName:Nicotinic acid-TMS ; pyridine-3-carboxylic acid

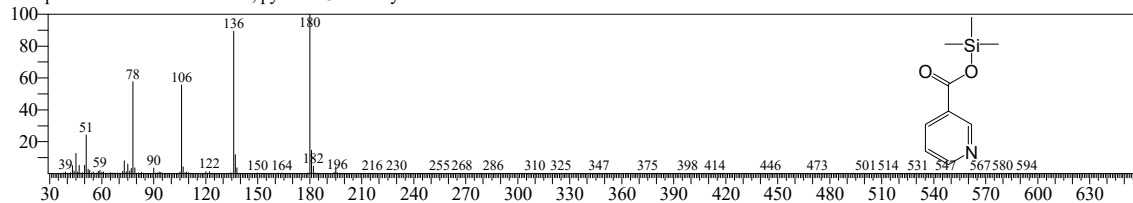

Hit#:2 Entry:34 Library:FA\_ME\_SP2560\_EI\_V3.lib

SI:26 Formula:C23H42O2 CAS:7370-49-2 MolWeight:350 RetIndex:3169

CompName:Methyl cis-13,16-Docosadienate ; (13Z,16E)-docosa-13,16-dienoic acid

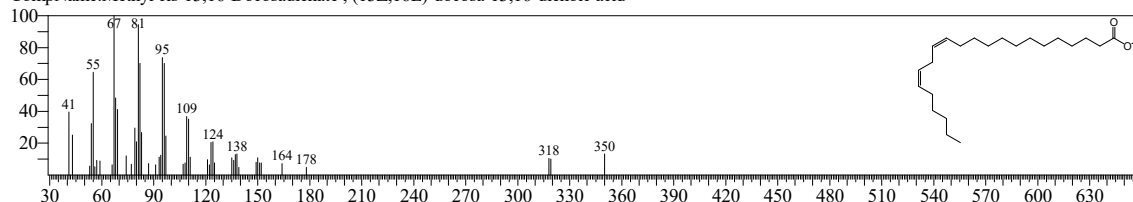

Hit#:3 Entry:21 Library:FA\_ME\_SP2560\_EI\_V3.lib

SI:26 Formula:C19H34O2 CAS:60-33-3 MolWeight:294 RetIndex:2775

CompName:Methyl linoleate ; Octadeca-9,12-dienoic acid

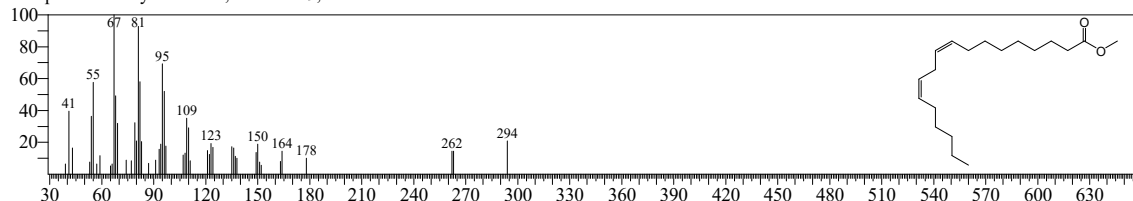

Hit#:4 Entry:20 Library:FA\_ME\_SP2560\_EI\_V3.lib

SI:25 Formula:C19H34O2 CAS:506-21-8 MolWeight:294 RetIndex:2727

CompName:Methyl linolelaidate ; (9E,12E)-octadeca-9,12-dienoic acid

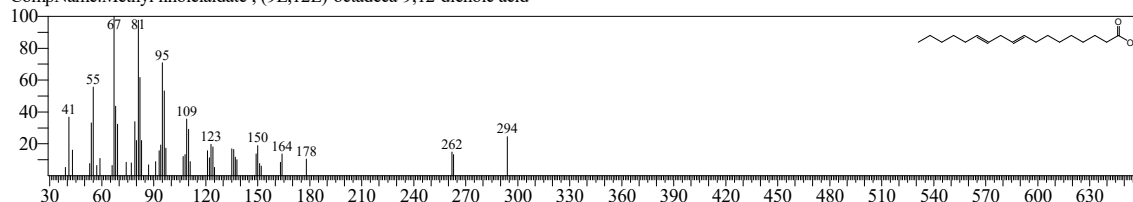

Hit#:5 Entry:36 Library:FA\_ME\_SP2560\_EI\_V3.lib

SI:25 Formula:C21H32O2 CAS:10417-94-4 MolWeight:316 RetIndex:3232

CompName:Methyl cis-5,8,11,14,17-Eicosapentaenoate ; Icosa-5,8,11,14,17-pentaenoic acid

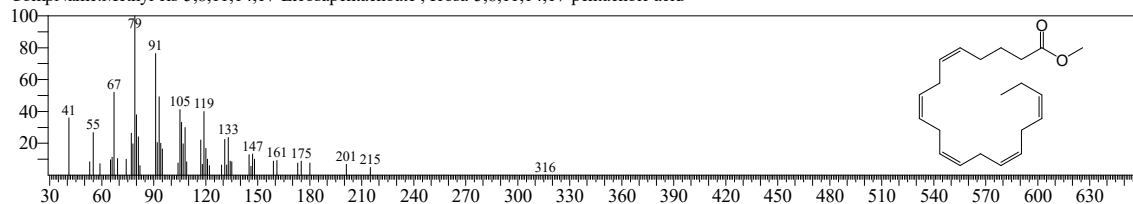

# TNAU

<< Target >>

Line#3 R.Time:13.245(Scan#:1650) MassPeaks:327

RawMode:Averaged 13.240-13.250(1649-1651) BasePeak:155.05(9425)

BG Mode:Calc. from Peak Group 1 - Event 1 Q3 Scan

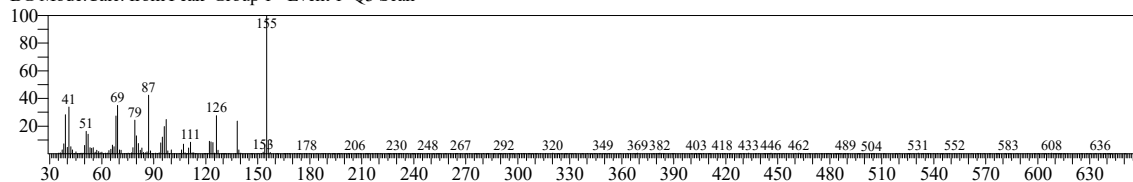

Hit#:1 Entry:34 Library:FA\_ME\_SP2560\_EI\_V3.lib

SI:54 Formula:C23H42O2 CAS:7370-49-2 MolWeight:350 RetIndex:3169

CompName:Methyl cis-13,16-Docosadienate ; (13Z,16E)-docosa-13,16-dienoic acid

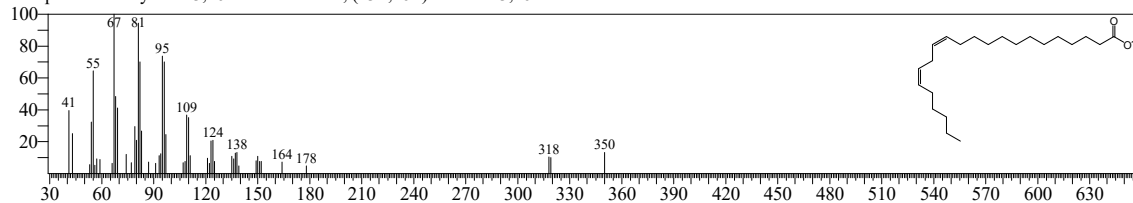

Hit#:2 Entry:21 Library:FA\_ME\_SP2560\_EI\_V3.lib

SI:53 Formula:C19H34O2 CAS:60-33-3 MolWeight:294 RetIndex:2775

CompName:Methyl linoleate ; Octadeca-9,12-dienoic acid

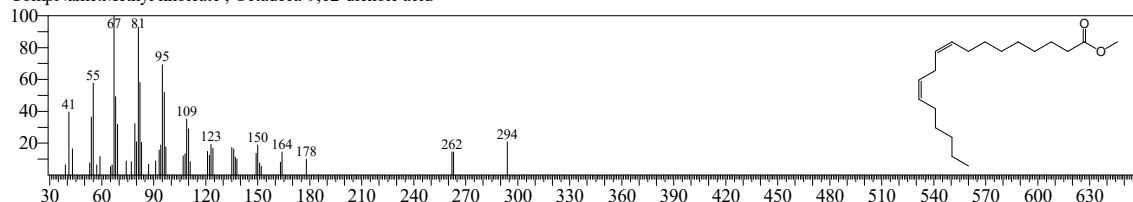

Hit#:3 Entry:20 Library:FA\_ME\_SP2560\_EI\_V3.lib

SI:52 Formula:C19H34O2 CAS:506-21-8 MolWeight:294 RetIndex:2727

CompName:Methyl linolelaidate ; (9E,12E)-octadeca-9,12-dienoic acid

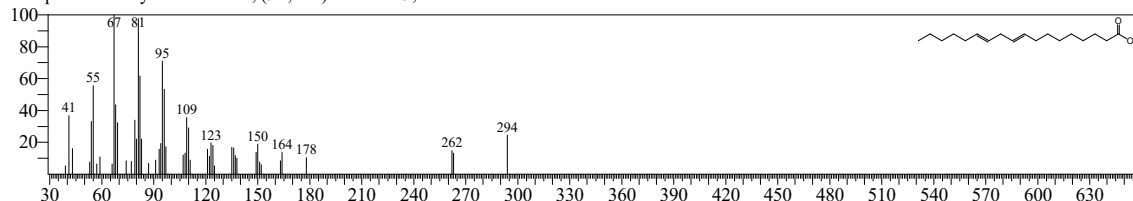

Hit#:4 Entry:27 Library:FA\_ME\_SP2560\_EI\_V3.lib

SI:52 Formula:C21H38O2 CAS:2091-39-6 MolWeight:322 RetIndex:2973

CompName:Methyl cis-11,14-Icosadienoate ; Icosa-11,14-dienoic acid

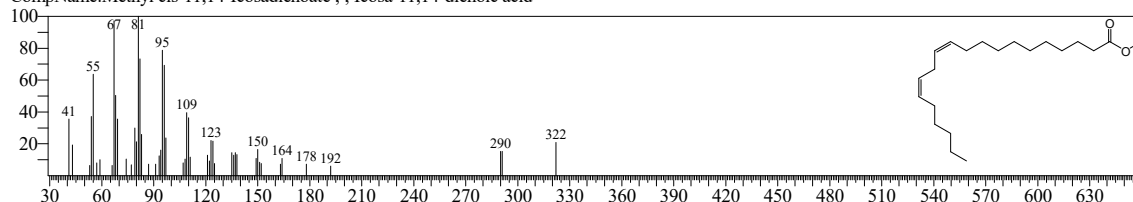

Hit#:5 Entry:11 Library:FA\_ME\_SP2560\_EI\_V3.lib

SI:52 Formula:C16H30O2 CAS:84743-29-3 MolWeight:254 RetIndex:2388

CompName:Methyl cis-10-pentadecenoate ; (Z)-pentadec-10-enoic acid

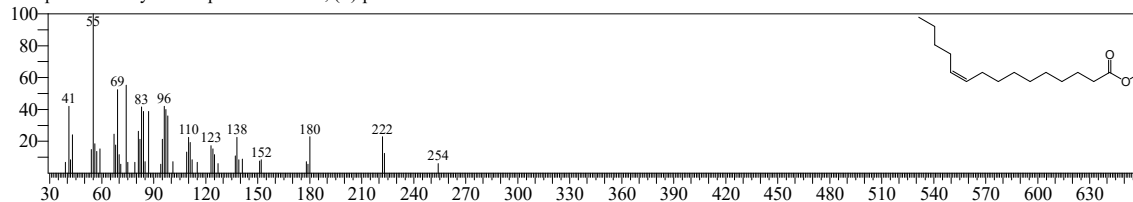

# TNAU

<< Target >>

Line#:4 R.Time:13.440(Scan#:1689) MassPeaks:339

RawMode:Averaged 13.435-13.445(1688-1690) BasePeak:155.10(6845)

BG Mode:Calc. from Peak Group 1 - Event 1 Q3 Scan

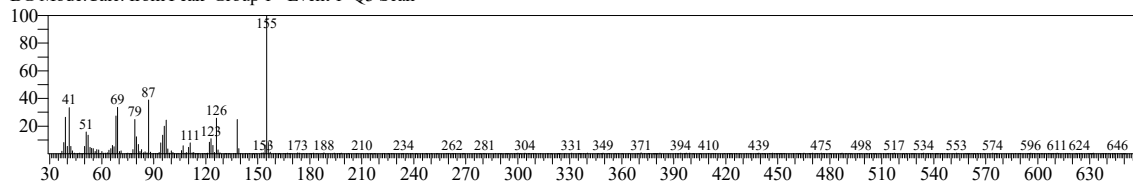

Hit#:1 Entry:34 Library:FA\_ME\_SP2560\_EI\_V3.lib

SI:52 Formula:C23H42O2 CAS:7370-49-2 MolWeight:350 RetIndex:3169

CompName:Methyl cis-13,16-Docosadienate ; (13Z,16E)-docosa-13,16-dienoic acid



Hit#:2 Entry:11 Library:FA\_ME\_SP2560\_EI\_V3.lib

SI:51 Formula:C16H30O2 CAS:84743-29-3 MolWeight:254 RetIndex:2388

CompName:Methyl cis-10-pentadecenoate ; (Z)-pentadec-10-enoic acid

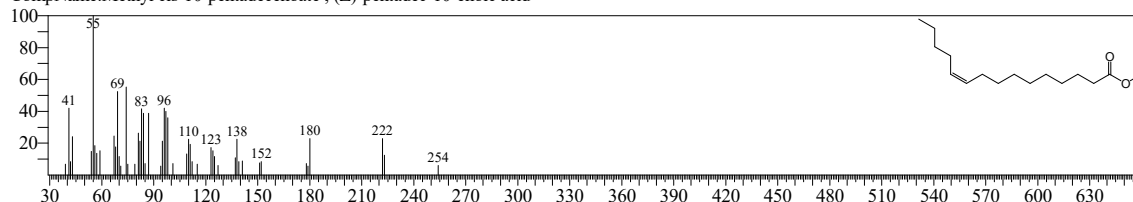

Hit#:3 Entry:21 Library:FA\_ME\_SP2560\_EI\_V3.lib

SI:51 Formula:C19H34O2 CAS:60-33-3 MolWeight:294 RetIndex:2775

CompName:Methyl linoleate ; Octadeca-9,12-dienoic acid



Hit#:4 Entry:20 Library:FA\_ME\_SP2560\_EI\_V3.lib

SI:50 Formula:C19H34O2 CAS:506-21-8 MolWeight:294 RetIndex:2727

CompName:Methyl linoleate ; (9E,12E)-octadeca-9,12-dienoic acid

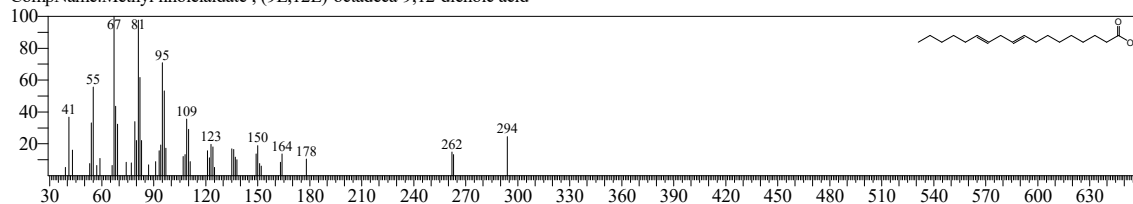

Hit#:5 Entry:27 Library:FA\_ME\_SP2560\_EI\_V3.lib

SI:50 Formula:C21H38O2 CAS:2091-39-6 MolWeight:322 RetIndex:2973

CompName:Methyl cis-11,14-Icosadienoate ; ; Icosa-11,14-dienoic acid

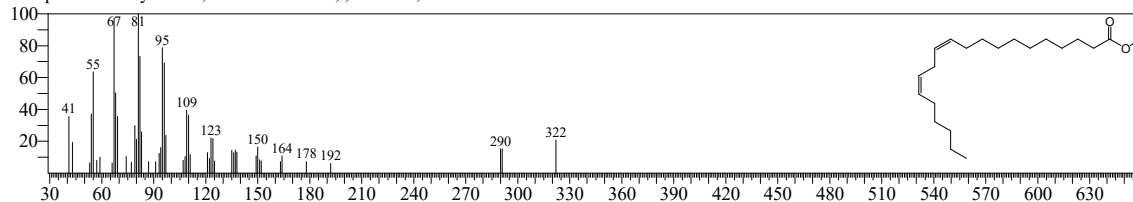

# TNAU

<< Target >>

Line#:5 R.Time:15.825(Scan#:2166) MassPeaks:367

RawMode:Averaged 15.820-15.830(2165-2167) BasePeak:73.10(893)

BG Mode:Calc. from Peak Group 1 - Event 1 Q3 Scan

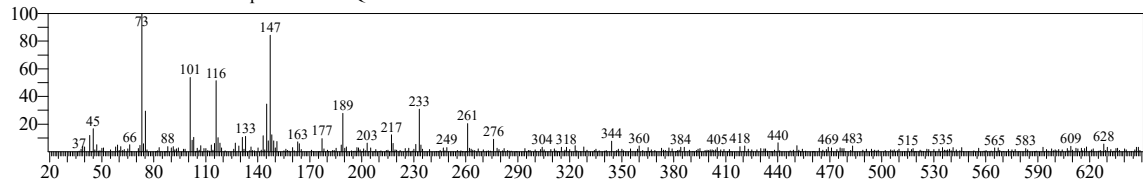

Hit#:1 Entry:169946 Library:NIST20M1.lib

SI:72 Formula:C12H26O5Si2 CAS:0-00-0 MolWeight:306 RetIndex:1380

CompName:Malic acid 1-ethyl ester, 2TMS \$S\$ 1-Ethyl 4-(trimethylsilyl) 2-((trimethylsilyl)oxy)succinate \$S\$ (-,+-)-1-Ethyl hydroxybutanedioate, 2TMS \$S\$ 1

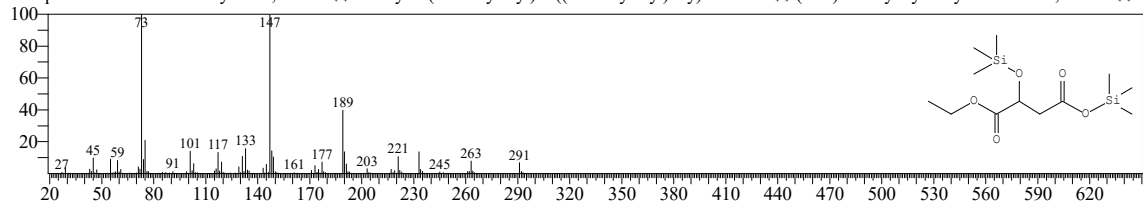

Hit#:2 Entry:115 Library:OA\_TMS\_DB5\_67min\_V3.lib

SI:64 Formula:C11H24O4Si2 CAS:110-94-1 MolWeight:276 RetIndex:1403

CompName:Glutaric acid-2TMS ; pentanedioic acid

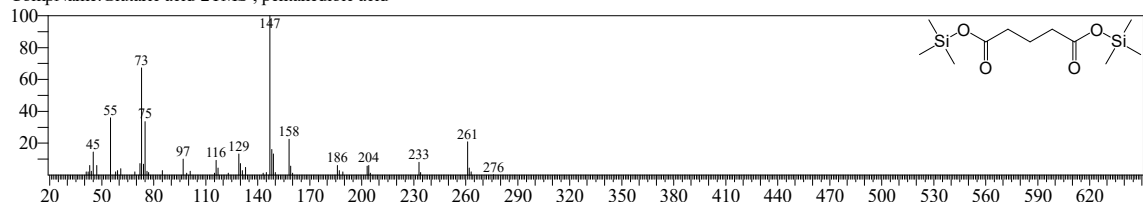

Hit#:3 Entry:61 Library:OA\_TMS\_DB5\_67min\_V3.lib

SI:64 Formula:C11H26O3Si2 CAS:10237-77-1 MolWeight:262 RetIndex:1244

CompName:3-Hydroxyvaleric acid-2TMS ; 3-hydroxy-3-methylbutanoic acid

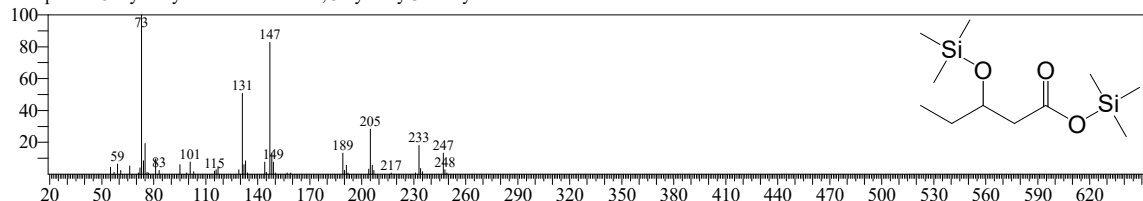

Hit#:4 Entry:123 Library:OA\_TMS\_DB5\_67min\_V3.lib

SI:63 Formula:C13H32O4Si3 CAS:51267-44-8 MolWeight:336 RetIndex:1439

CompName:2-Deoxytetronic acid-3TMS ; 3,4-dihydroxybutanoic acid

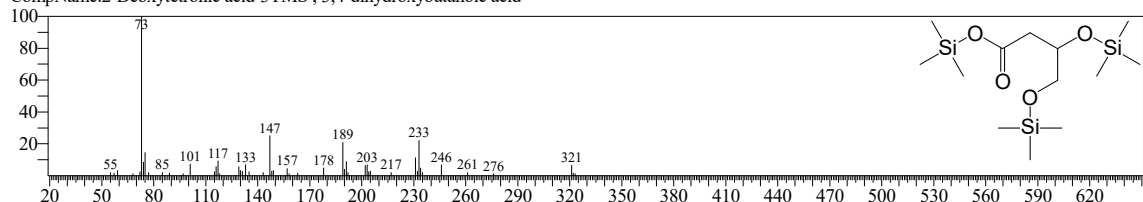

Hit#:5 Entry:77 Library:OA\_TMS\_DB5\_67min\_V3.lib

SI:62 Formula:C12H32O3Si3 CAS:56-81-5 MolWeight:308 RetIndex:1279

CompName:Glycerol-3TMS ; propane-1,2,3-triol

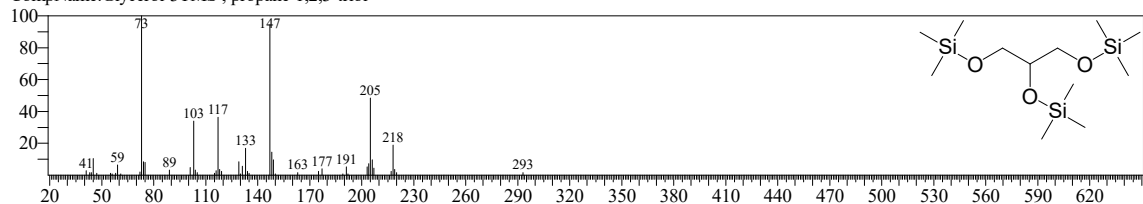

# TNAU

<< Target >>

Line#6 R.Time:19.195(Scan#:2840) MassPeaks:310

RawMode:Averaged 19.190-19.200(2839-2841) BasePeak:263.20(9343)

BG Mode:Calc. from Peak Group 1 - Event 1 Q3 Scan

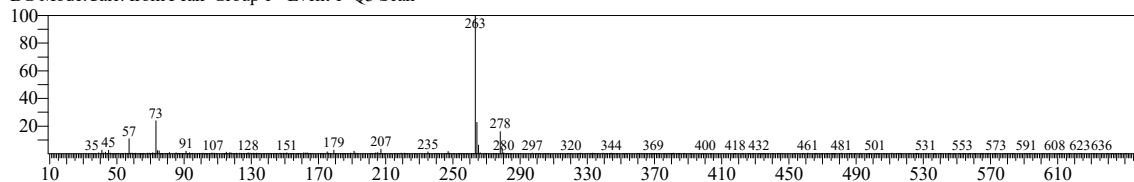

Hit#1 Entry:33874 Library:NIST20R.lib

SI:93 Formula:C17H30OSi CAS:53925-65-8 MolWeight:278 RetIndex:1632

CompName:2,4-Di-tert-butylphenoxytrimethylsilane \$\$ Benzene, 2,4-bis(1,1-dimethylethyl)-1-[(trimethylsilyl)oxy]- \$\$ Silane, [2,4-bis(1,1-dimethylethyl)ph

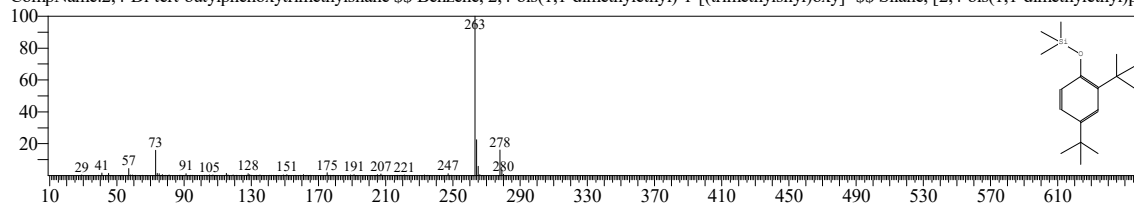

Hit#2 Entry:33871 Library:NIST20R.lib

SI:85 Formula:C17H30OSi CAS:10416-73-6 MolWeight:278 RetIndex:1632

CompName:2,6-Bis(tert-butyl)phenol, TMS derivative \$\$ Trimethyl(2,6 ditert-butylphenoxy)silane \$\$ (2,6-Ditert-butylphenoxy)(trimethyl)silane #

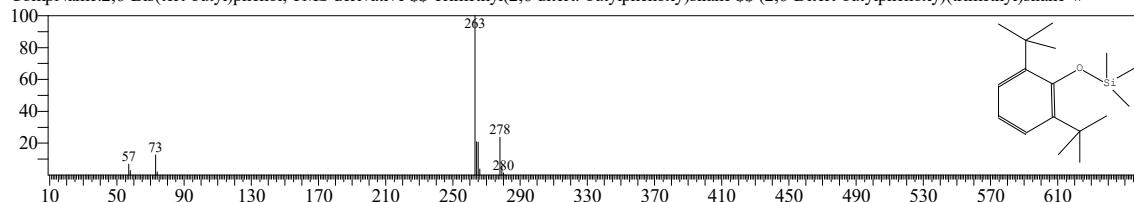

Hit#3 Entry:136557 Library:NIST20M1.lib

SI:84 Formula:C12H22N4Si2 CAS:0-00-0 MolWeight:278 RetIndex:1703

CompName:3-Deazaadenine, 2TMS \$\$ 3-Deazaadenine, N,N'-bis-TMS \$\$ 1H-Imidazo[4,5-c]pyridin-4-amine, N,N'-bis-TMS

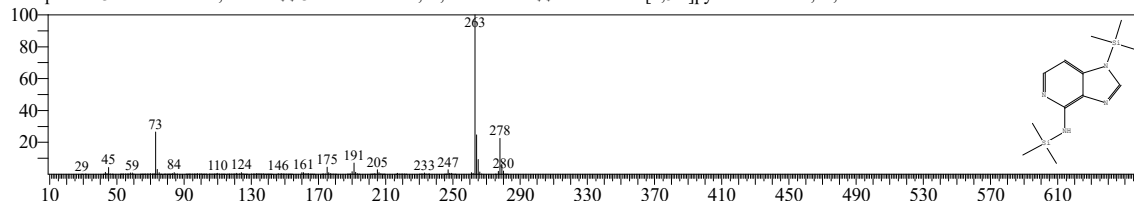

Hit#4 Entry:136556 Library:NIST20M1.lib

SI:80 Formula:C12H22N4Si2 CAS:0-00-0 MolWeight:278 RetIndex:1606

CompName:1H,1'H-2,2'-Biimidazole, 2TMS \$\$ 1H,1'H-2,2'-Biimidazole, N,N'-bis-TMS \$\$ 1H,1'H-[2,2']Biimidazolyl, 2TMS \$\$ 2,2'-Bi-1H-imidazole, 2TMS

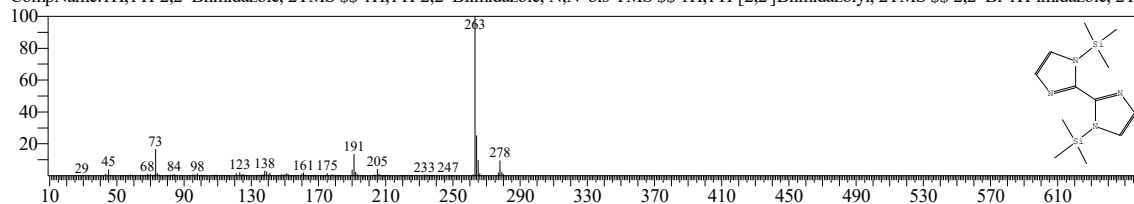

Hit#5 Entry:137020 Library:NIST20M1.lib

SI:79 Formula:C15H22O3Si CAS:0-00-0 MolWeight:278 RetIndex:1736

CompName:6-Methoxy-2,2-dimethyl-2,3-dihydro-4H-chromen-4-one, TMS \$\$ 6-Methoxy-2,2-dimethyl-chroman-4-one, O-trimethylsilyl- \$\$ 4H-1-Benzopy

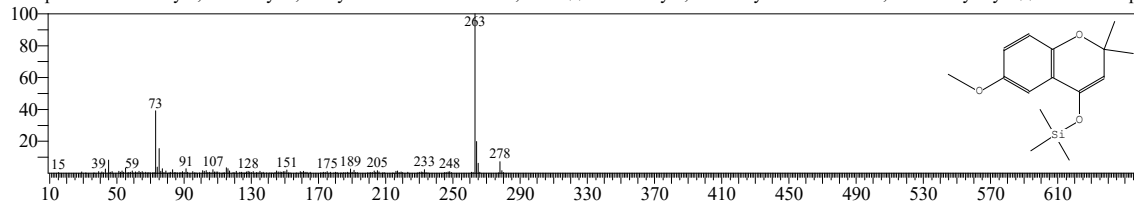

# TNAU

<< Target >>

Line#:7 R.Time:28.305(Scan#:4662) MassPeaks:363

RawMode:Averaged 28.300-28.310(4661-4663) BasePeak:73.05(5136)

BG Mode:Calc. from Peak Group 1 - Event 1 Q3 Scan

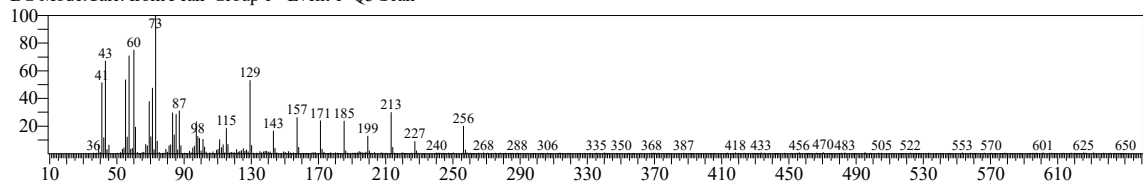

Hit#:1 Entry:31600 Library:NIST20R.lib

SI:95 Formula:C16H32O2 CAS:57-10-3 MolWeight:256 RetIndex:1968

CompName:n-Hexadecanoic acid \$ Hexadecanoic acid \$ n-Hexadecic acid \$ Palmitic acid \$ Pentadecanecarboxylic acid \$ 1-Pentadecanecarboxylic

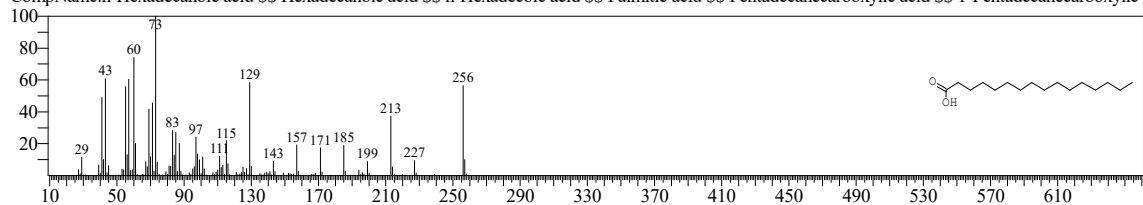

Hit#:2 Entry:29890 Library:NIST20R.lib

SI:91 Formula:C15H30O2 CAS:1002-84-2 MolWeight:242 RetIndex:1869

CompName:Pentadecanoic acid \$ Pentadecylic acid \$ n-Pentadecanoic acid \$ n-Pentadecylic acid

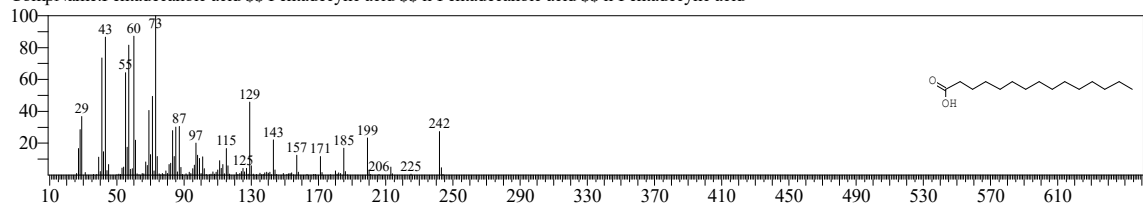

Hit#:3 Entry:44286 Library:NIST20M2.lib

SI:90 Formula:C38H68O8 CAS:28474-90-0 MolWeight:652 RetIndex:4765

CompName:l-(+)-Ascorbic acid 2,6-dihexadecanoate

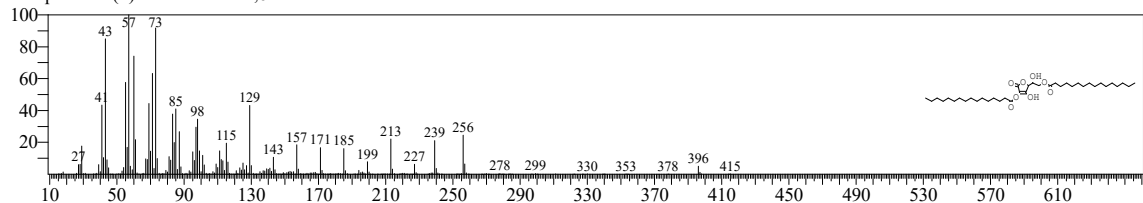

Hit#:4 Entry:25643 Library:NIST20R.lib

SI:90 Formula:C13H26O2 CAS:638-53-9 MolWeight:214 RetIndex:1670

CompName:Tridecanoic acid \$ n-Tridecanoic acid \$ n-Tridecoic acid \$ Tridecylic acid

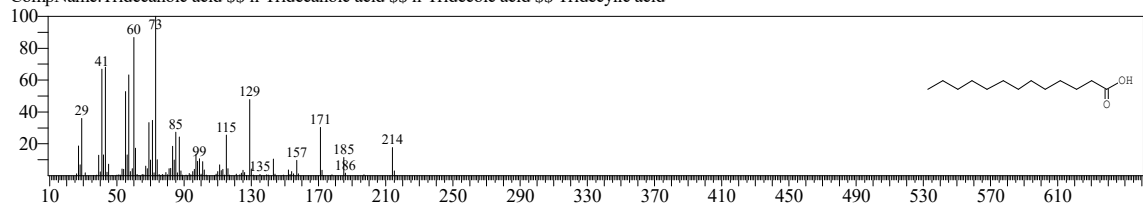

Hit#:5 Entry:144781 Library:NIST20M1.lib

SI:89 Formula:C18H36O2 CAS:57-11-4 MolWeight:284 RetIndex:2167

CompName:Octadecanoic acid \$ Stearic acid \$ n-Octadecanoic acid \$ Humko Industriene R \$ Hydrofol Acid 150 \$ Hystrene S-97 \$ Hystrene T-70 \$

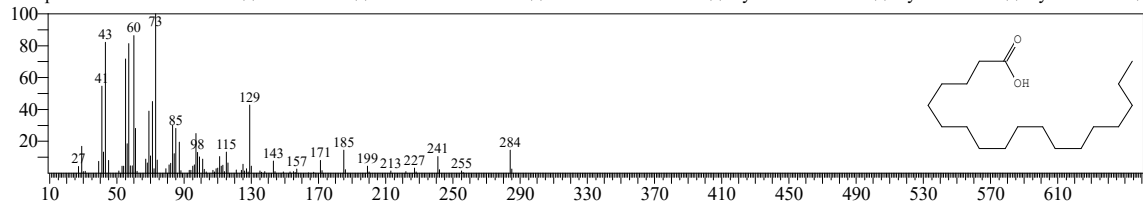



# TNAU

<< Target >>

Line#:8 R.Time:31.480(Scan#:5297) MassPeaks:324

RawMode:Averaged 31.475-31.485(5296-5298) BasePeak:67.05(4411)

BG Mode:Calc. from Peak Group 1 - Event 1 Q3 Scan

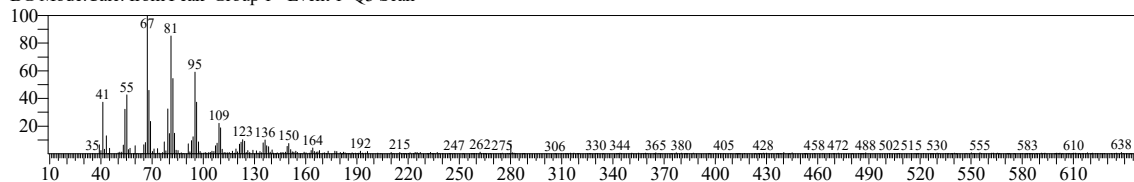

Hit#:1 Entry:139646 Library:NIST20M1.lib

SI:95 Formula:C18H32O2 CAS:2420-56-6 MolWeight:280 RetIndex:2183

CompName:10E,12Z-Octadecadienoic acid

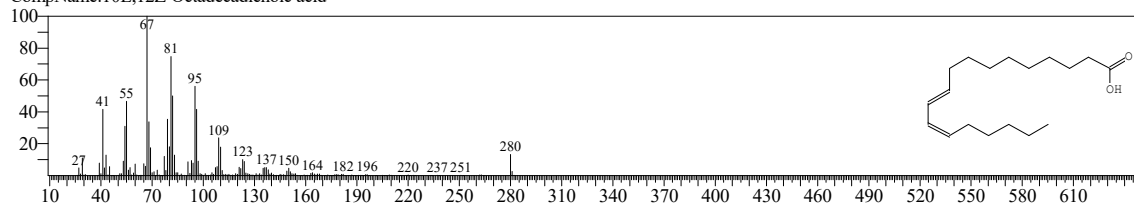

Hit#:2 Entry:139651 Library:NIST20M1.lib

SI:95 Formula:C18H32O2 CAS:544-71-8 MolWeight:280 RetIndex:2183

CompName:(9E,11E)-Octadecadienoic acid

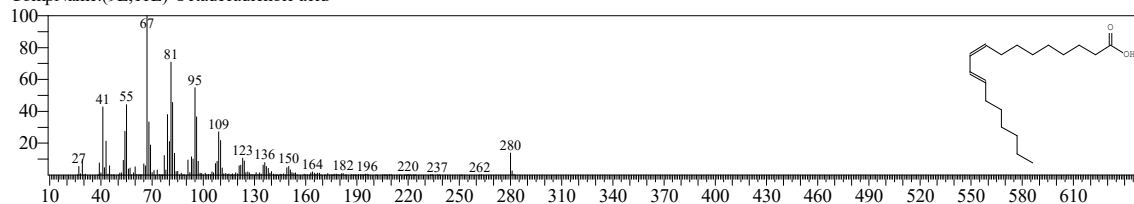

Hit#:3 Entry:34035 Library:NIST20R.lib

SI:94 Formula:C18H32O2 CAS:60-33-3 MolWeight:280 RetIndex:2183

CompName:9,12-Octadecadienoic acid (Z,Z)- \$\$ cis-9,cis-12-Octadecadienoic acid \$\$ cis,cis-Linoleic acid \$\$ Grape seed oil \$\$ Linoleic acid \$

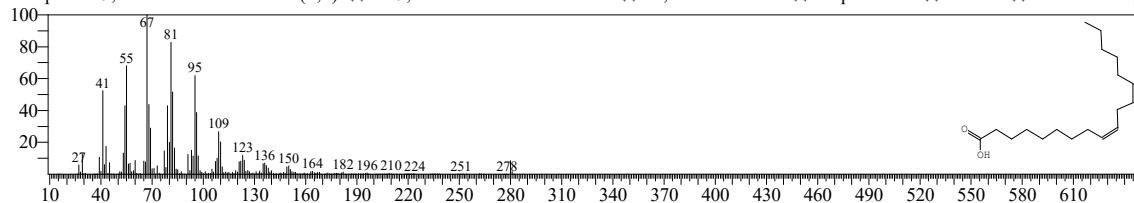

Hit#:4 Entry:139661 Library:NIST20M1.lib

SI:94 Formula:C18H32O2 CAS:506-21-8 MolWeight:280 RetIndex:2183

CompName:Linoelaidic acid

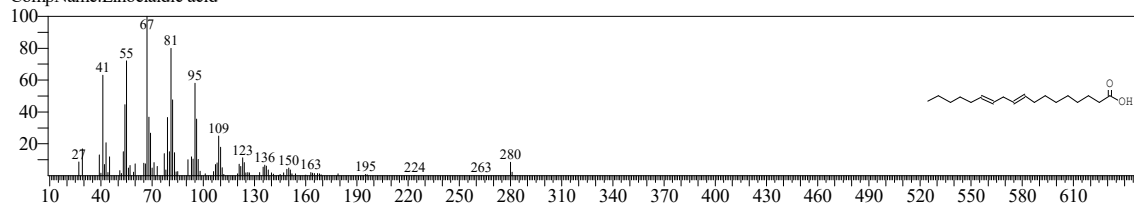

Hit#:5 Entry:173215 Library:NIST20M1.lib

SI:92 Formula:C20H36O2 CAS:2091-39-6 MolWeight:308 RetIndex:2382

CompName:11,14-Eicosadienoic acid

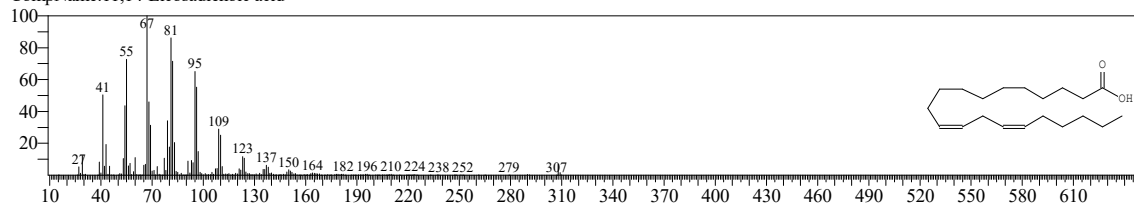

# TNAU

<< Target >>

Line#9 R.Time:31.585(Scan#:5318) MassPeaks:405

RawMode:Averaged 31.580-31.590(5317-5319) BasePeak:79.05(1416)

BG Mode:Calc. from Peak Group 1 - Event 1 Q3 Scan

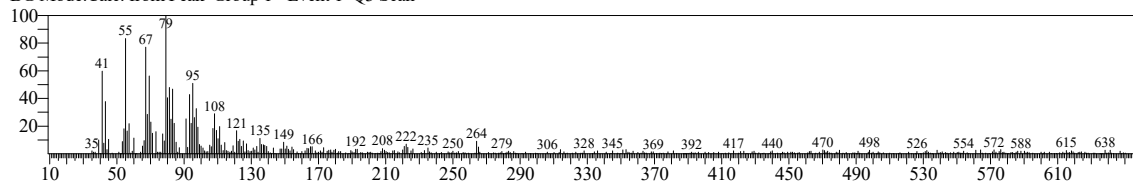

Hit#1 Entry:63176 Library:NIST20M1.lib

SI:86 Formula:C14H26O CAS:65128-96-3 MolWeight:210 RetIndex:1609

CompName:7-Tetradecenal, (Z)- \$\$ Z-7-Tetradecenal \$\$ (7Z)-7-Tetradecenal #

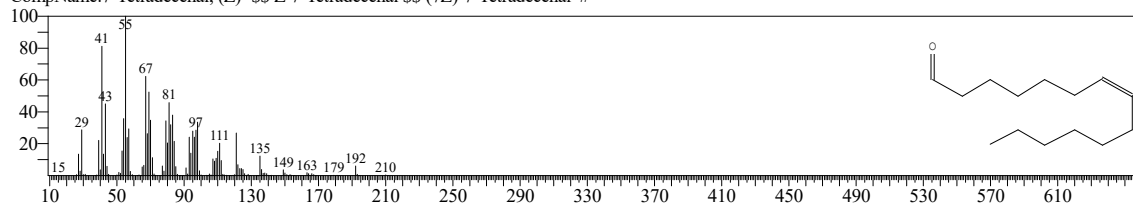

Hit#2 Entry:170238 Library:NIST20M1.lib

SI:86 Formula:C15H24Cl2O2 CAS:0-00-0 MolWeight:306 RetIndex:2042

CompName:Dichloroacetic acid, tridec-2-ynyl ester

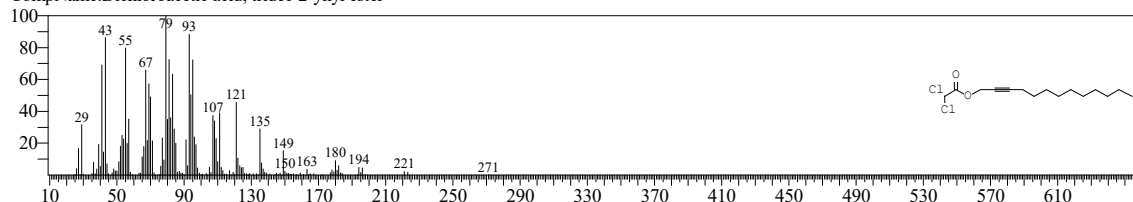

Hit#3 Entry:34034 Library:NIST20R.lib

SI:85 Formula:C18H32O2 CAS:60-33-3 MolWeight:280 RetIndex:2183

CompName:9,12-Octadecadienoic acid (Z,Z)- \$\$ cis-9,cis-12-Octadecadienoic acid \$\$ cis,cis-Linoleic acid \$\$ Grape seed oil \$\$ Linoleic \$\$ Linoleic acid \$

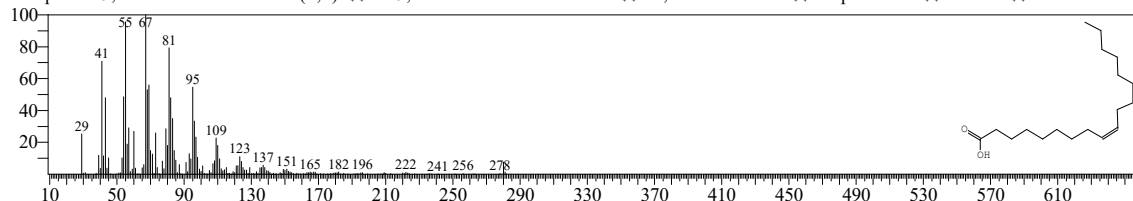

Hit#4 Entry:29348 Library:NIST20R.lib

SI:85 Formula:C16H30O CAS:56219-04-6 MolWeight:238 RetIndex:1808

CompName:cis-9-Hexadecenal \$\$ 9-Hexadecenal, (Z)- \$\$ (Z)-9-Hexadecenal \$\$ Z-9-Hexadecenal \$\$ (9Z)-9-Hexadecenal #

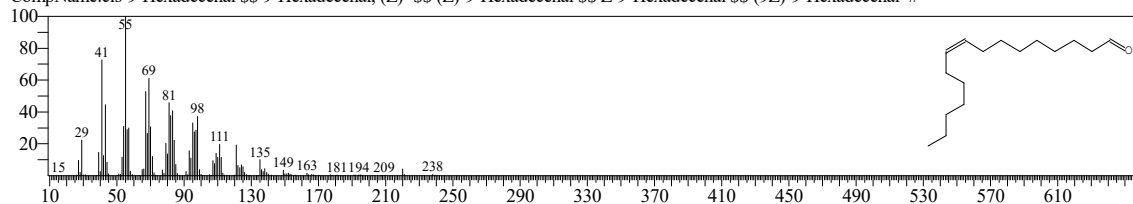

Hit#5 Entry:39500 Library:NIST20R.lib

SI:85 Formula:C21H36O4 CAS:18465-99-1 MolWeight:352 RetIndex:2705

CompName:9,12,15-Octadecatrienoic acid, 2,3-dihydroxypropyl ester, (Z,Z,Z)- \$\$ Linolenin, 1-mono- \$\$ .alpha.-Glyceryl linolenate \$\$ 2,3-Dihydroxypropyl

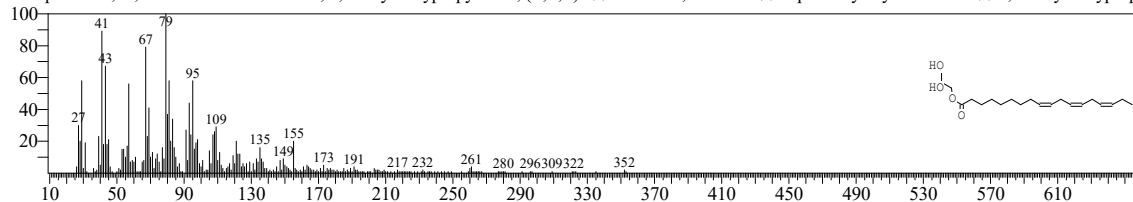

# TNAU

<< Target >>

Line#:10 R.Time:45.645(Scan#:8130) MassPeaks:404

RawMode:Averaged 45.640-45.650(8129-8131) BasePeak:139.15(2306)

BG Mode:Calc. from Peak Group 1 - Event 1 Q3 Scan

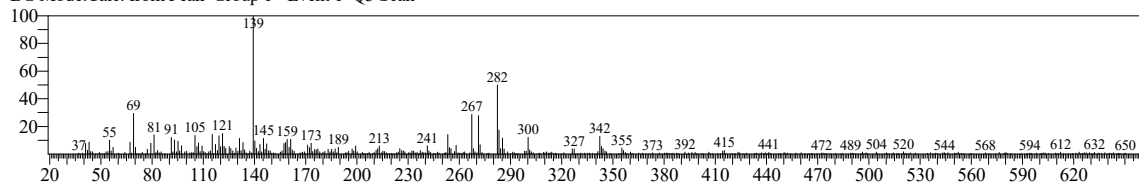

Hit#:1 Entry:8297 Library:NIST20M2.lib

SI:89 Formula:C27H42O3 CAS:512-04-9 MolWeight:414 RetIndex:2844

CompName:Diosgenin \$\$ Spirost-5-en-3-ol, (3.beta.,25R)- \$\$ Spirost-5-en-3.beta.-ol, (25R)- \$\$ Nitrogenin \$\$ 25D-spirost-5-en-3.beta.-ol \$\$ Spiro(8H-nap

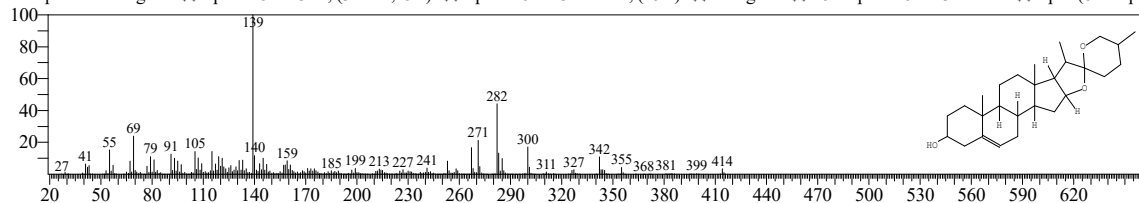

Hit#:2 Entry:14852 Library:NIST20M2.lib

SI:82 Formula:C28H44O3 CAS:116292-24-1 MolWeight:428 RetIndex:2793

CompName:Diosgenin methyl ether \$\$ Diosgenin Me derivative \$\$ (3.beta.,25R)-3-Methoxyspirost-5-ene \$\$ Spirost-5-ene, 3-methoxy-, (3.beta.,25R)-

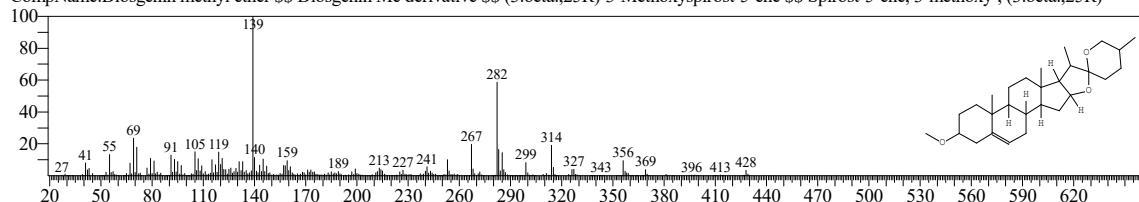

Hit#:3 Entry:24878 Library:NIST20M2.lib

SI:79 Formula:C29H44O4 CAS:1061-54-7 MolWeight:456 RetIndex:2984

CompName:Spirost-5-en-3-ol, acetate, (3.beta.,25R)- \$\$ Diosgenin acetate \$\$ Spirost-5-en-3.beta.-ol, acetate, (25R)- \$\$ Spirost-5-en-3.beta.-ol, acetate, (2-

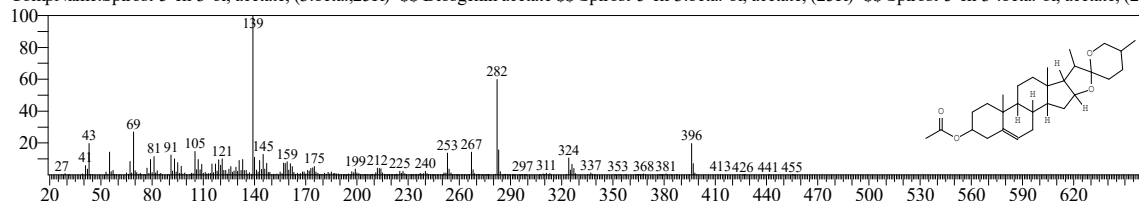

Hit#:4 Entry:41561 Library:NIST20R.lib

SI:79 Formula:C27H42O2 CAS:32277-73-9 MolWeight:398 RetIndex:2713

CompName:Des-N-solasodine \$\$ Furosta-5,20(22)-dien-3-ol #

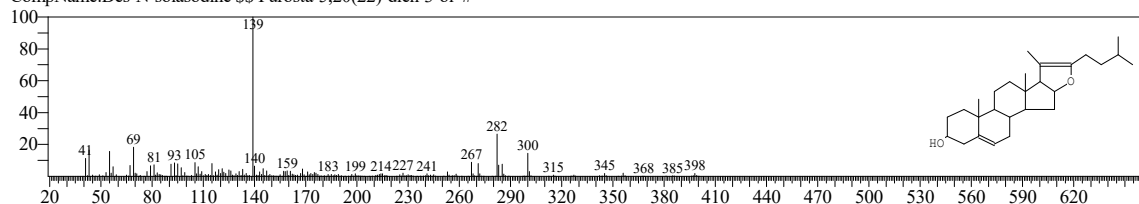

Hit#:5 Entry:42677 Library:NIST20R.lib

SI:75 Formula:C29H44O4 CAS:1180-12-7 MolWeight:456 RetIndex:2984

CompName:Neodiosgenin (3.beta.,25S) acetate \$\$ Spirost-5-en-3-ol, 3-acetate, (3.beta.,25S)- \$\$ Spirost-5-en-3-ol, acetate, (3.beta.,25S)- \$\$ Spirost-5-en-3-

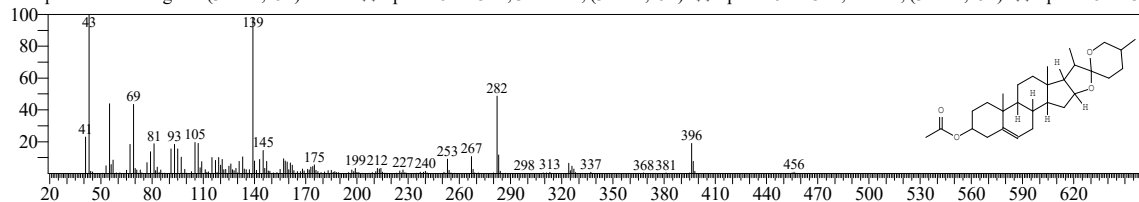

Supplement: Supplementary file 33 [file supplementary]
