# Supplementary material for: Comparative Metabolomics Profiling Reveals Key Metabolites and Associated Pathways Regulating Tuber Dormancy in White Yam (<em>Dioscorea rotundata</em>)
Source: Preprints.org preprint supplement (doi:10.20944/preprints202303.0378.v1), 2023-03-21

# TNAU

## Sample Information

Analyzed by : Admin  
 Analyzed : 05-Aug-22 1:21:38 AM  
 Sample Type : Unknown  
 Level # : 1  
 Sample Name : C115-1  
 Sample ID : C115-1  
 IS Amount : [1]=1  
 Sample Amount : 1  
 Dilution Factor : 1  
 Vial # : 14  
 Injection Volume : 1.00  
 Data File : D:\GCMS-8040NX\Aug 2022\Users\04.08.2022\Data files\04082022-014.qgd  
 Org Data File : D:\GCMS-8040NX\Aug 2022\Users\04.08.2022\Data files\04082022-014.qgd  
 Method File : D:\GCMS-8040NX\Aug 2022\Users\04.08.2022\Method file\27072022\_methodfile.qgm  
 Org Method File : D:\GCMS-8040NX\Aug 2022\Users\04.08.2022\Method file\27072022\_methodfile.qgm  
 Report File :  
 Tuning File : D:\GCMS-8040NX\Aug 2022\Tuning Data\TUNING 04082022.qgt  
 [Comment]  
 Jerry samples  
 Modified by : Admin  
 Modified : 05-Aug-22 4:30:52 PM

Chromatogram C115-1 D:\GCMS-8040NX\Aug 2022\Users\04.08.2022\Data files\04082022-014.qgd

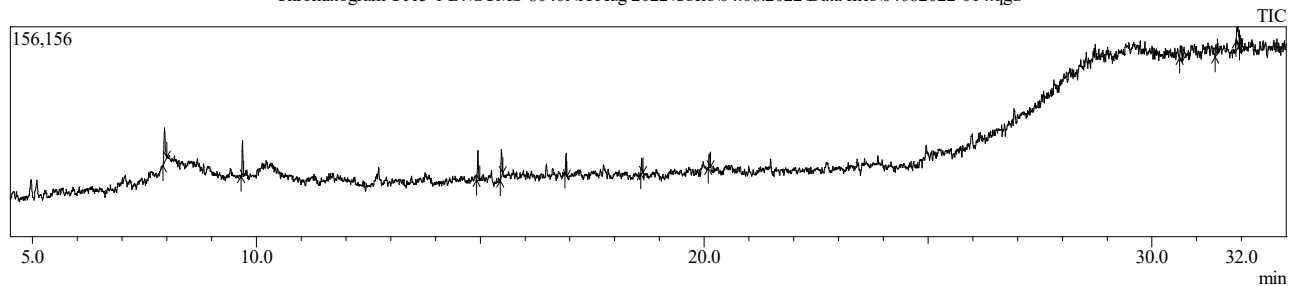

Peak Report TIC

| Peak# | R.Time | Area   | Area%  | Height | Height% | A/H  | Similarity | Name                                 |
|-------|--------|--------|--------|--------|---------|------|------------|--------------------------------------|
| 1     | 7.947  | 52524  | 17.87  | 25633  | 15.04   | 2.05 | 86         | Undecane                             |
| 2     | 9.689  | 38765  | 13.19  | 26433  | 15.51   | 1.47 | 87         | Dodecane                             |
| 3     | 14.947 | 34572  | 11.76  | 22011  | 12.92   | 1.57 | 86         | Cycloheptasiloxane, tetradecamethyl- |
| 4     | 15.472 | 31621  | 10.76  | 20266  | 11.89   | 1.56 | 87         | 2,4-Di-tert-butylphenol              |
| 5     | 16.915 | 18074  | 6.15   | 16153  | 9.48    | 1.12 | 83         | Cyclooctasiloxane, hexadecamethyl-   |
| 6     | 18.606 | 15123  | 5.15   | 10882  | 6.39    | 1.39 | 78         | Cyclononasiloxane, octadecamethyl-   |
| 7     | 20.115 | 15269  | 5.20   | 10412  | 6.11    | 1.47 | 44         | 3,4-Dihydroxymandelic acid-4TMS      |
| 8     | 30.650 | 23332  | 7.94   | 10788  | 6.33    | 2.16 | 38         | Inosine-4TMS                         |
| 9     | 31.420 | 15542  | 5.29   | 6989   | 4.10    | 2.22 | 41         | Epinephrine-3TMS                     |
| 10    | 31.895 | 33863  | 11.52  | 11122  | 6.53    | 3.04 | 28         | Fumaric acid-13C4-2TMS               |
| 11    | 31.973 | 15192  | 5.17   | 9732   | 5.71    | 1.56 | 31         | Anthranilic acid-2TMS                |
|       |        | 293877 | 100.00 | 170421 | 100.00  |      |            |                                      |

Library

# TNAU

<< Target >>

Line#:1 R.Time:7.945(Scan#:690) MassPeaks:291  
RawMode:Averaged 7.940-7.950(689-691) BasePeak:57.10(4877)  
BG Mode:Calc. from Peak Group 1 - Event 1 Q3 Scan

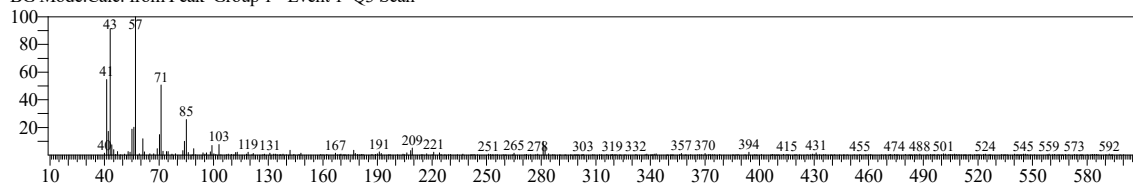

Hit#:1 Entry:12897 Library:NIST20R.lib  
SI:86 Formula:C11H24 CAS:1120-21-4 MolWeight:156 RetIndex:1100  
CompName:Undecane \$\$ n-Undecane \$\$ Hendecane \$\$ n-C11H24 \$\$ UN 2330

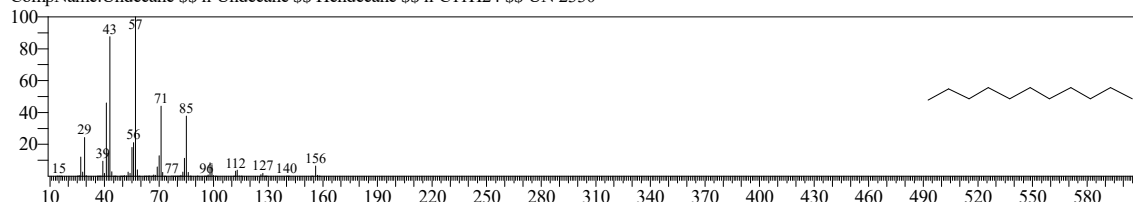

Hit#:2 Entry:13604 Library:NIST20M1.lib  
SI:86 Formula:C10H22 CAS:124-18-5 MolWeight:142 RetIndex:1000  
CompName:Decane \$\$ n-Decane \$\$ n-C10H22 \$\$ UN 2247

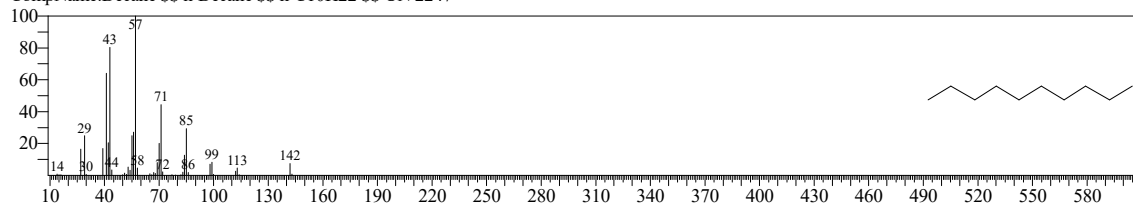

Hit#:3 Entry:19411 Library:NIST20R.lib  
SI:86 Formula:C13H28 CAS:629-50-5 MolWeight:184 RetIndex:1300  
CompName:Tridecane \$\$ n-Tridecane \$\$ Tridecane, n-

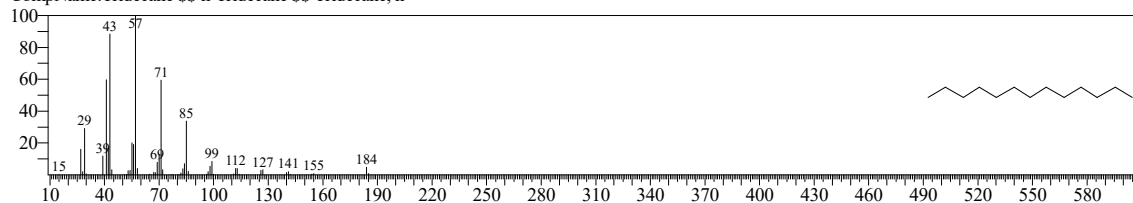

Hit#:4 Entry:16191 Library:NIST20R.lib  
SI:85 Formula:C12H26 CAS:112-40-3 MolWeight:170 RetIndex:1200  
CompName:Dodecane \$\$ n-Dodecane \$\$ Adakane 12 \$\$ Ba 51-090453 \$\$ CH3(CH2)10CH3 \$\$ Bihexyl \$\$ Dihexyl \$\$ Duodecane \$\$ NSC 8714

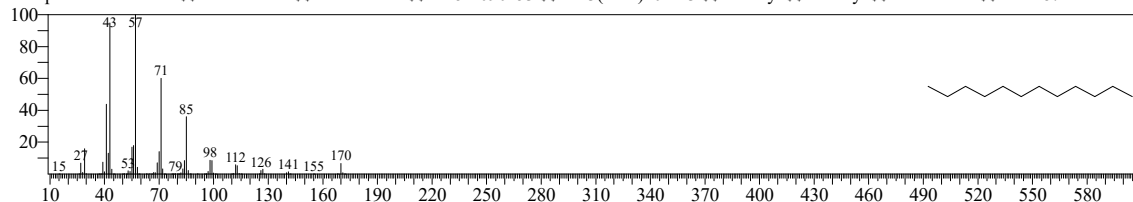

Hit#:5 Entry:21028 Library:NIST20M1.lib  
SI:85 Formula:C11H24 CAS:6975-98-0 MolWeight:156 RetIndex:1051  
CompName:Decane, 2-methyl- \$\$ 2-Methyldecane \$\$ n-C8H17CH(CH3)2

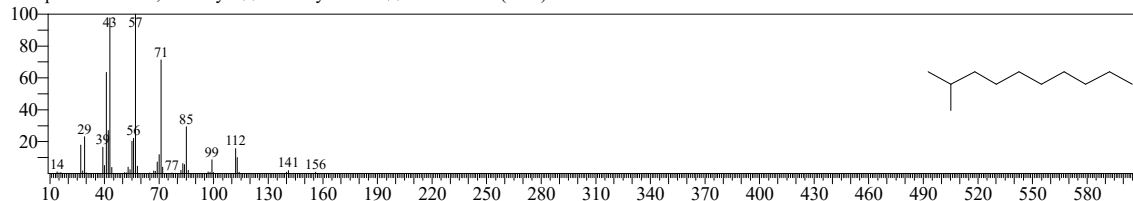

# TNAU

<< Target >>

Line# 2 R.Time: 9.690 (Scan#: 1039) MassPeaks: 300

RawMode: Averaged 9.685-9.695 (1038-1040) BasePeak: 57.10 (5462)

BG Mode: Calc. from Peak Group 1 - Event 1 Q3 Scan

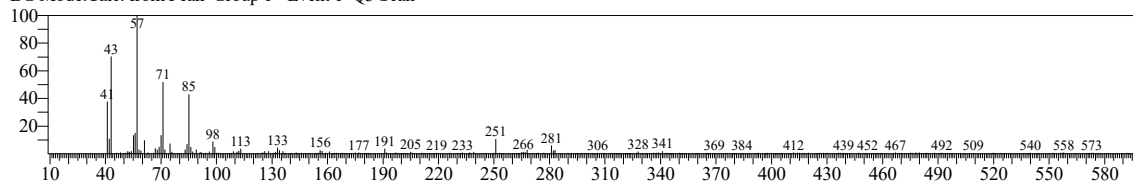

Hit#: 1 Entry: 30057 Library: NIST20M1.lib

SI: 87 Formula: C<sub>12</sub>H<sub>26</sub> CAS: 112-40-3 MolWeight: 170 RetIndex: 1200

CompName: Dodecane \$\$ n-Dodecane \$\$ Adakane 12 \$\$ Ba 51-090453 \$\$ CH<sub>3</sub>(CH<sub>2</sub>)<sub>10</sub>CH<sub>3</sub> \$\$ Bihexyl \$\$ Dihexyl \$\$ Duodecane \$\$ NSC 8714

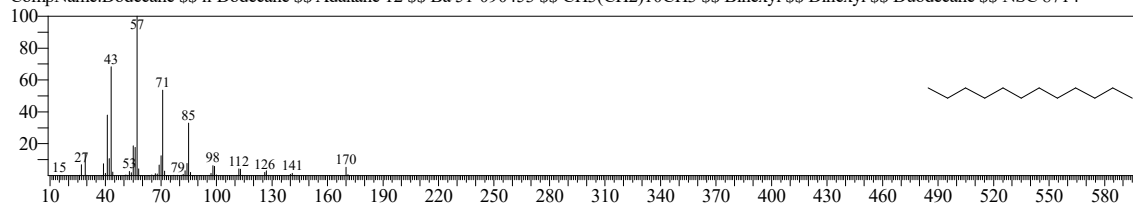

Hit#: 2 Entry: 12897 Library: NIST20R.lib

SI: 87 Formula: C<sub>11</sub>H<sub>24</sub> CAS: 1120-21-4 MolWeight: 156 RetIndex: 1100

CompName: Undecane \$\$ n-Undecane \$\$ Hendecane \$\$ n-C<sub>11</sub>H<sub>24</sub> \$\$ UN 2330

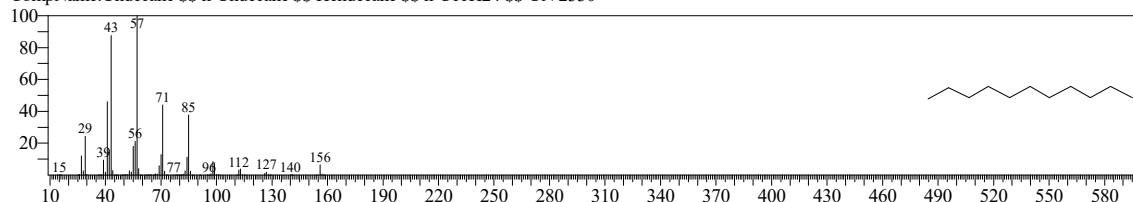

Hit#: 3 Entry: 22497 Library: NIST20R.lib

SI: 87 Formula: C<sub>14</sub>H<sub>30</sub> CAS: 629-59-4 MolWeight: 198 RetIndex: 1400

CompName: Tetradecane \$\$ n-Tetradecane

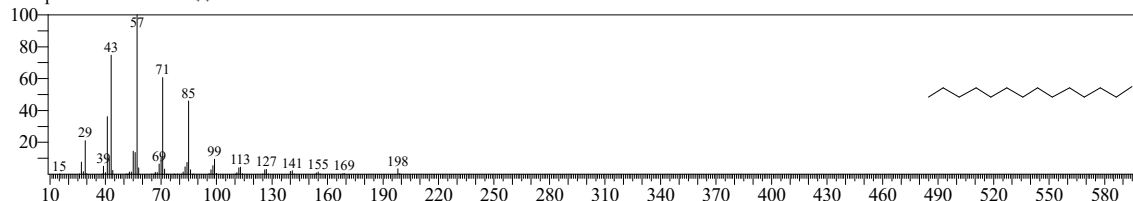

Hit#: 4 Entry: 40226 Library: NIST20M1.lib

SI: 87 Formula: C<sub>13</sub>H<sub>28</sub> CAS: 629-50-5 MolWeight: 184 RetIndex: 1300

CompName: Tridecane \$\$ n-Tridecane \$\$ Tridecane, n-

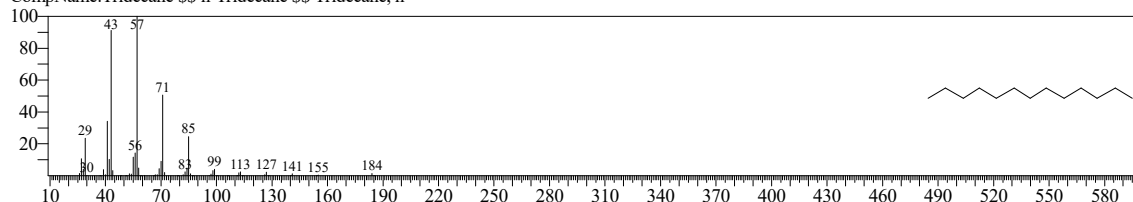

Hit#: 5 Entry: 32904 Library: NIST20R.lib

SI: 86 Formula: C<sub>19</sub>H<sub>40</sub> CAS: 629-92-5 MolWeight: 268 RetIndex: 1900

CompName: Nonadecane \$\$ n-Nonadecane

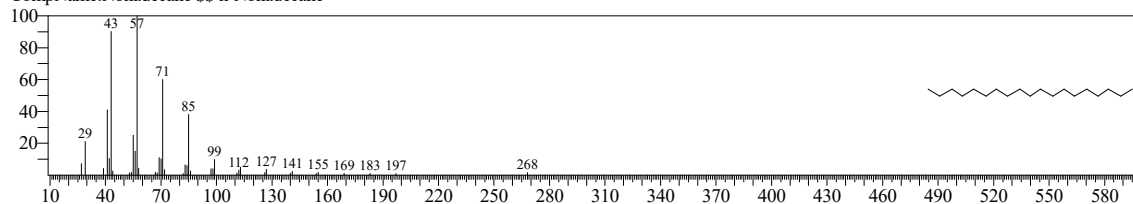

# TNAU

<< Target >>

Line#3 R.Time:14.945(Scan#:2090) MassPeaks:297

RawMode:Averaged 14.940-14.950(2089-2091) BasePeak:281.05(3671)

BG Mode:Calc. from Peak Group 1 - Event 1 Q3 Scan

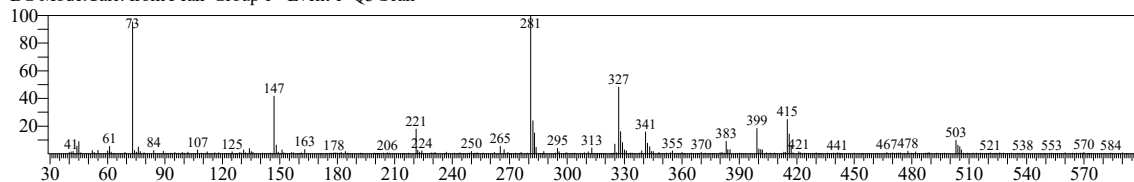

Hit#1 Entry:43264 Library:NIST20R.lib

SI:86 Formula:C14H42O7Si7 CAS:107-50-6 MolWeight:518 RetIndex:1447

CompName:Cycloheptasiloxane, tetradecamethyl- \$ 2,2,4,4,6,6,8,8,10,10,12,12,14,14-Tetradecamethylcycloheptasiloxane # \$ Tetradecamethylcyclohept

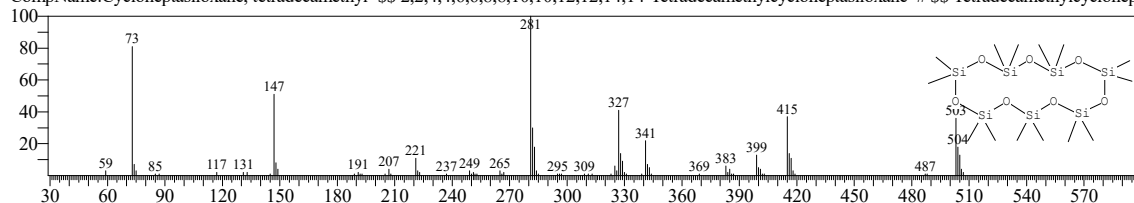

Hit#2 Entry:184 Library:OA\_TMS\_DB5\_67min\_V3.lib

SI:47 Formula:C14H24O3Si2 CAS:614-75-5 MolWeight:296 RetIndex:1579

CompName:2-Hydroxyphenylacetic acid-2TMS ; 2-(2-hydroxyphenyl)acetic acid

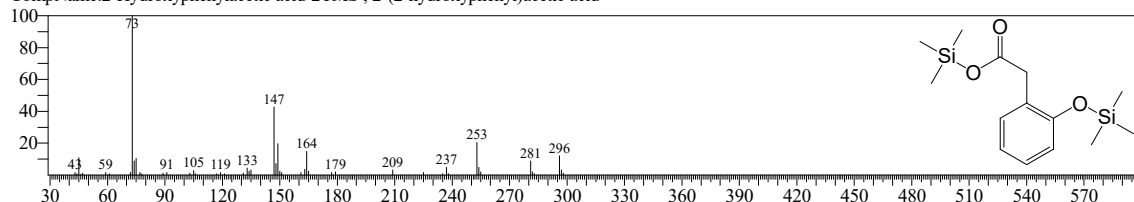

Hit#3 Entry:384 Library:OA\_TMS\_DB5\_67min\_V3.lib

SI:46 Formula:C17H35NO3Si3 CAS:65-23-6 MolWeight:385 RetIndex:1919

CompName:Pyridoxine-3TMS ; 4,5-bis(hydroxymethyl)-2-methylpyridin-3-ol

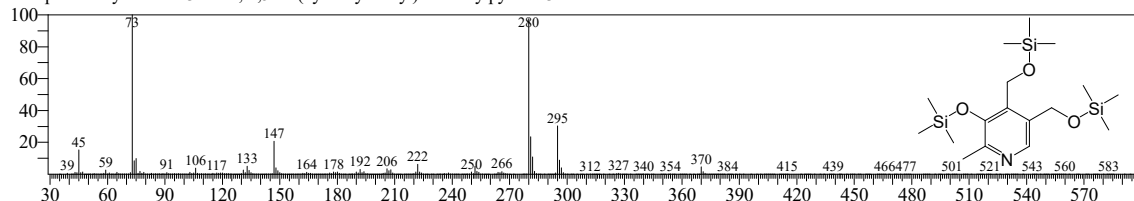

Hit#4 Entry:438 Library:OA\_TMS\_DB5\_67min\_V3.lib

SI:45 Formula:C12H22N2O2Si2 CAS:104-98-3 MolWeight:282 RetIndex:2014

CompName:Urocanic acid-2TMS ; (E)-3-(1H-imidazol-5-yl)prop-2-enoic acid

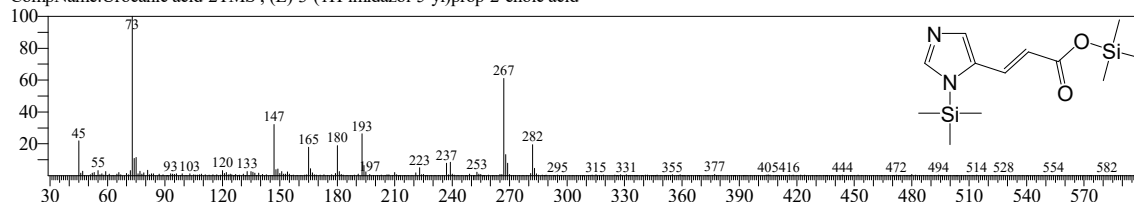

Hit#5 Entry:200 Library:OA\_TMS\_DB5\_67min\_V3.lib

SI:45 Formula:C14H24O3Si2 CAS:621-37-4 MolWeight:296 RetIndex:1617

CompName:3-Hydroxyphenylacetic acid-2TMS ; 2-(3-hydroxyphenyl)acetic acid

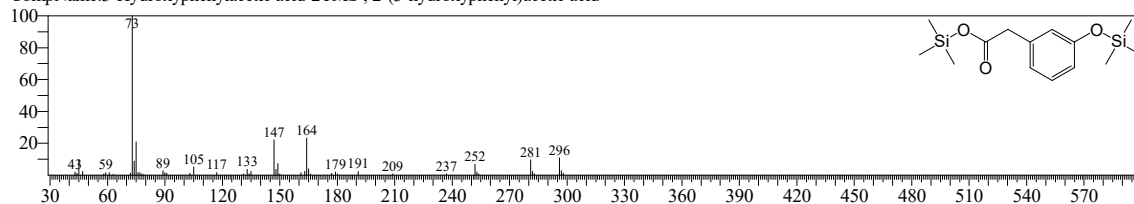

# TNAU

<< Target >>

Line#:4 R.Time:15.470(Scan#:2195) MassPeaks:248

RawMode:Averaged 15.465-15.475(2194-2196) BasePeak:191.15(7193)

BG Mode:Calc. from Peak Group 1 - Event 1 Q3 Scan

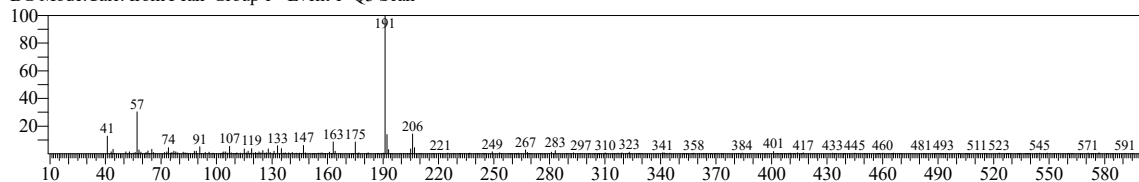

Hit#:1 Entry:24086 Library:NIST20R.lib

SI:87 Formula:C<sub>14</sub>H<sub>22</sub>O CAS:96-76-4 MolWeight:206 RetIndex:1555

CompName:2,4-Di-tert-butylphenol \$\$ Phenol, 2,4-bis(1,1-dimethylethyl)- \$\$ Phenol, 2,4-di-tert-butyl- \$\$ 2,4-di-t-Butylphenol \$\$ 1-Hydroxy-2,4-di-tert-bu

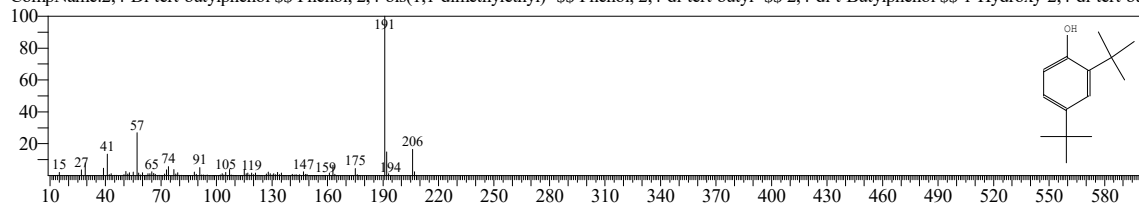

Hit#:2 Entry:24110 Library:NIST20R.lib

SI:85 Formula:C<sub>14</sub>H<sub>22</sub>O CAS:1138-52-9 MolWeight:206 RetIndex:1555

CompName:Phenol, 3,5-bis(1,1-dimethylethyl)- \$\$ Phenol, 3,5-di-tert-butyl- \$\$ 3,5-Di-tert-butylphenol \$\$ Phenol, 3,5-bis(t-butyl) \$\$ 3,5-Di-t-butylphenol \$

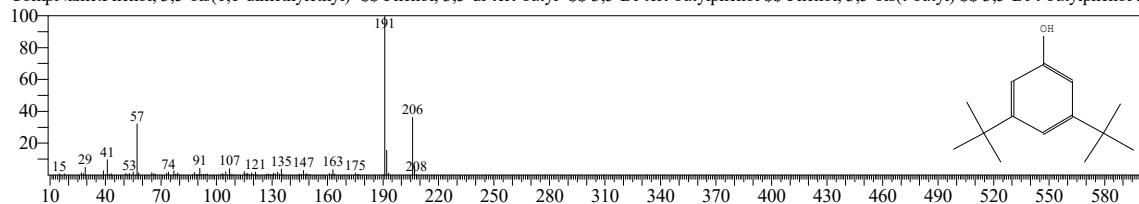

Hit#:3 Entry:59031 Library:NIST20M1.lib

SI:85 Formula:C<sub>14</sub>H<sub>22</sub>O CAS:128-39-2 MolWeight:206 RetIndex:1555

CompName:Phenol, 2,6-bis(1,1-dimethylethyl)- \$\$ Phenol, 2,6-di-tert-butyl- \$\$ 2,6-Bis(tert-butyl)phenol \$\$ 2,6-Bis(1,1-dimethylethyl)phenol \$\$ 2,6-Di-tert

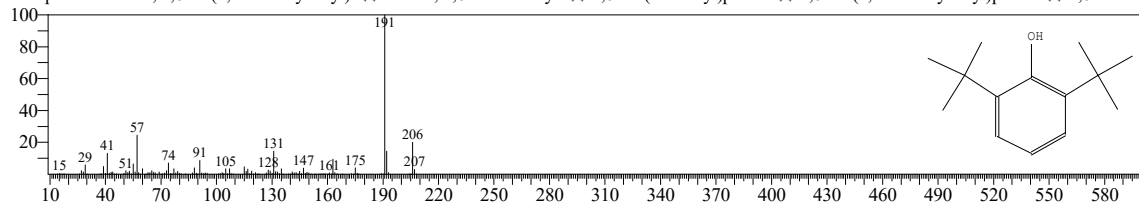

Hit#:4 Entry:24098 Library:NIST20R.lib

SI:83 Formula:C<sub>14</sub>H<sub>22</sub>O CAS:5875-45-6 MolWeight:206 RetIndex:1555

CompName:Phenol, 2,5-bis(1,1-dimethylethyl)- \$\$ Phenol, 2,5-di-tert-butyl- \$\$ 2,5-Di-tert-butylphenol \$\$ 2,5-bis(1,1-Dimethylethyl)phenol

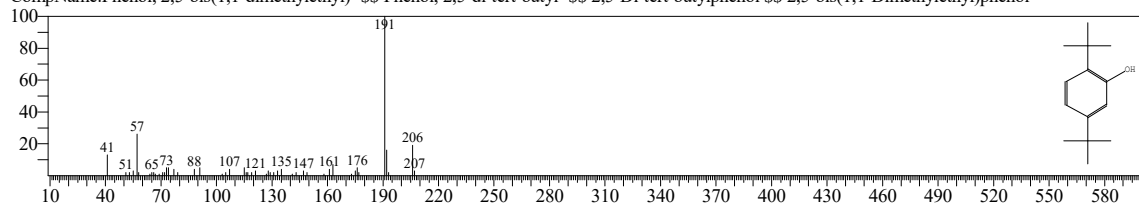

Hit#:5 Entry:103047 Library:NIST20M1.lib

SI:82 Formula:C<sub>16</sub>H<sub>24</sub>O<sub>2</sub> CAS:104316-22-5 MolWeight:248 RetIndex:1714

CompName:2,4-Di-tert-butylphenol, acetate

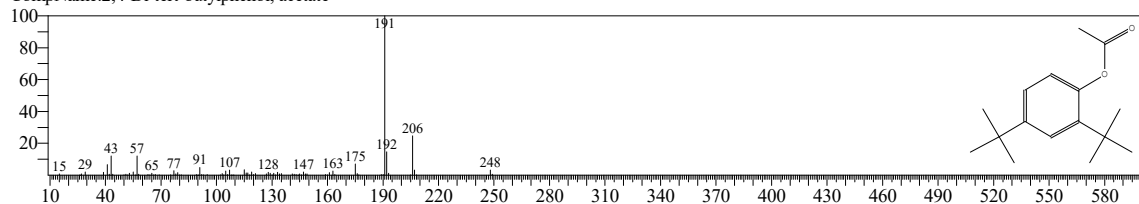

# TNAU

<< Target >>

Line#5 R.Time:16.915(Scan#:2484) MassPeaks:281

RawMode:Averaged 16.910-16.920(2483-2485) BasePeak:355.05(2556)

BG Mode:Calc. from Peak Group 1 - Event 1 Q3 Scan

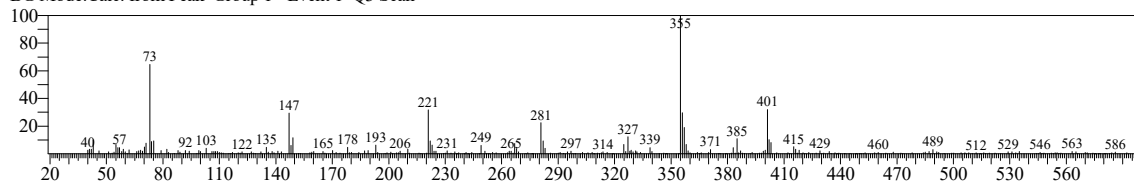

Hit#1 Entry:42384 Library:NIST20M2.lib

SI:83 Formula:C16H48O8Si8 CAS:556-68-3 MolWeight:592 RetIndex:1654

CompName:Cyclooctasiloxane, hexadecamethyl- \$\$ Hexadecamethyl-cyclooctasiloxane \$\$ Hexadecamethylcyclooctasiloxane \$\$ 2,2,4,4,6,6,8,8,10,10,12,12

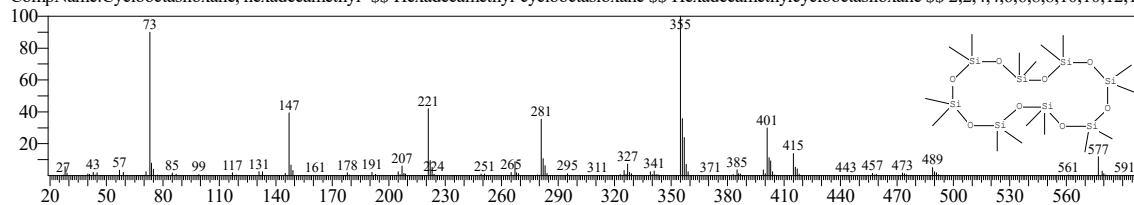

Hit#2 Entry:402 Library:OA\_TMS\_DB5\_67min\_V3.lib

SI:65 Formula:C20H42O4Si4 CAS:775-01-9 MolWeight:458 RetIndex:1942

CompName:3,4-Dihydroxymandelic acid-4TMS ; 2-(3,4-dihydroxyphenyl)-2-hydroxyacetic acid

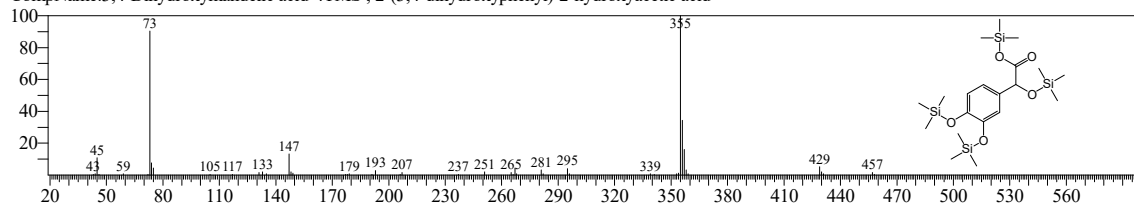

Hit#3 Entry:343 Library:OA\_TMS\_DB5\_67min\_V3.lib

SI:59 Formula:C18H37NO3Si3 CAS:51-43-4 MolWeight:399 RetIndex:1868

CompName:Epinephrine-3TMS ; 4-[(1R)-1-hydroxy-2-(methylamino)ethyl]benzene-1,2-diol

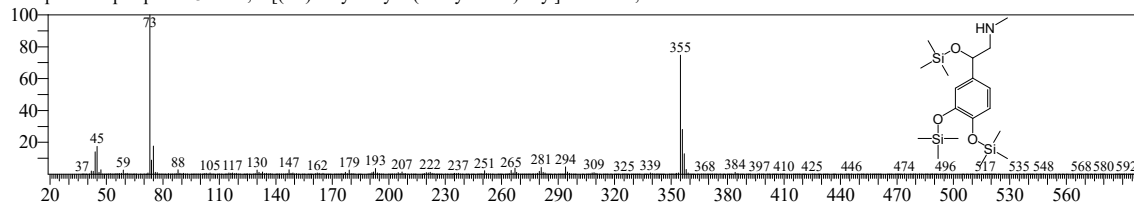

Hit#4 Entry:315 Library:OA\_TMS\_DB5\_67min\_V3.lib

SI:47 Formula:C16H30O4Si3 CAS:99-50-3 MolWeight:370 RetIndex:1833

CompName:Protocatechuic acid-3TMS ; 3,4-dihydroxybenzoic acid

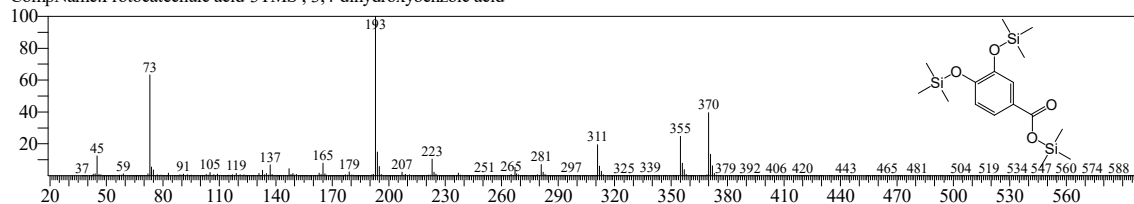

Hit#5 Entry:438 Library:OA\_TMS\_DB5\_67min\_V3.lib

SI:44 Formula:C12H22N2O2Si2 CAS:104-98-3 MolWeight:282 RetIndex:2014

CompName:Urocanic acid-2TMS ; (E)-3-(1H-imidazol-5-yl)prop-2-enoic acid

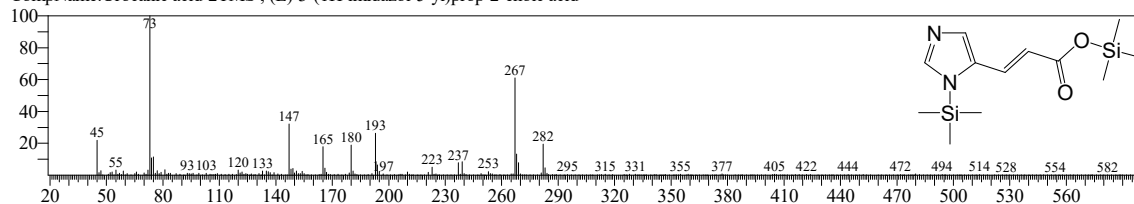

# TNAU

<< Target >>

Line#6 R.Time:18.605(Scan#:2822) MassPeaks:289

RawMode:Averaged 18.600-18.610(2821-2823) BasePeak:429.15(1471)

BG Mode:Calc. from Peak Group 1 - Event 1 Q3 Scan

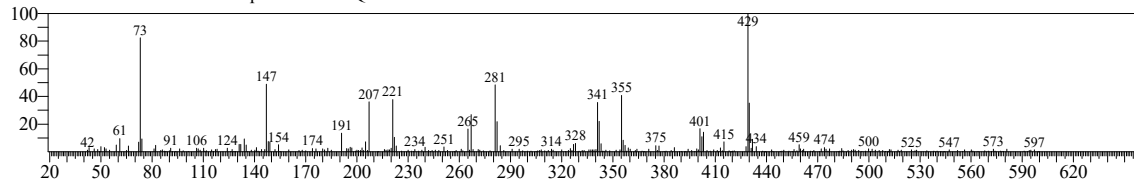

Hit#1 Entry:44570 Library:NIST20M2.lib

SI:78 Formula:C18H54O9Si9 CAS:556-71-8 MolWeight:666 RetIndex:1860

CompName:Cyclononasiloxane, octadecamethyl- \$S\$ Octadecamethyl-cyclononasiloxane \$S\$ 2,2,4,4,6,6,8,8,10,10,12,12,14,14,16,16,18,18-Octadecamethyl-

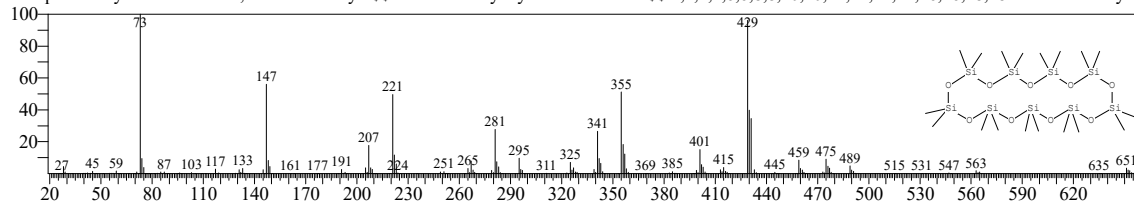

Hit#2 Entry:402 Library:OA TMS\_DB5\_67min\_V3.lib

SI:55 Formula:C20H42O4Si4 CAS:775-01-9 MolWeight:458 RetIndex:1942

CompName:3,4-Dihydroxymandelic acid-4TMS ; 2-(3,4-dihydroxyphenyl)-2-hydroxyacetic acid

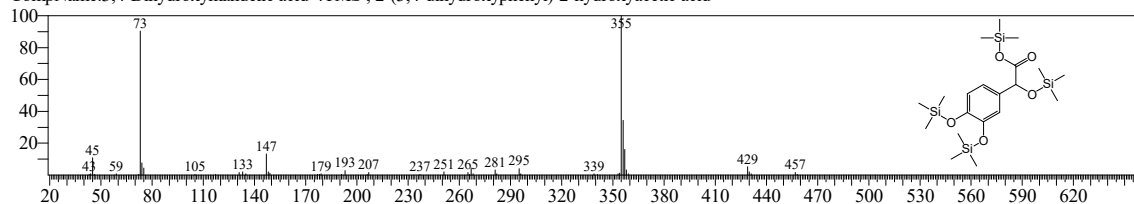

Hit#3 Entry:343 Library:OA TMS\_DB5\_67min\_V3.lib

SI:45 Formula:C18H37NO3Si3 CAS:51-43-4 MolWeight:399 RetIndex:1868

CompName:Epinephrine-3TMS ; 4-[(1R)-1-hydroxy-2-(methylamino)ethyl]benzene-1,2-diol

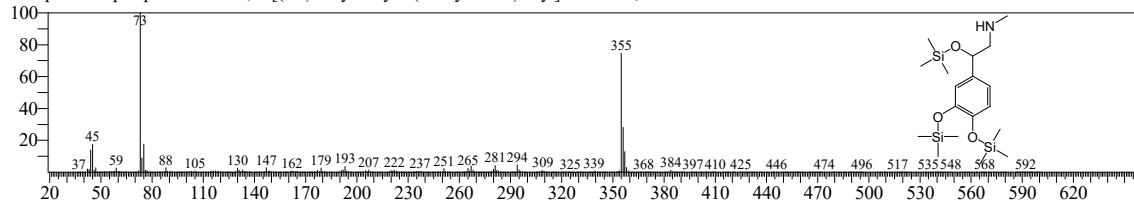

Hit#4 Entry:24 Library:OA TMS\_DB5\_67min\_V3.lib

SI:41 Formula: CAS:0-00-0 MolWeight:236 RetIndex:1130

CompName:Oxalic acid-13C2-2TMS ;

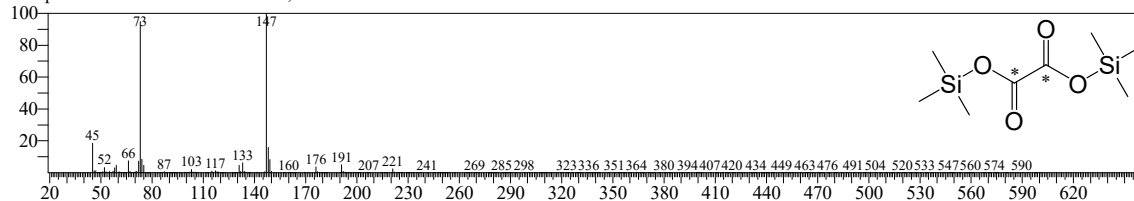

Hit#5 Entry:143 Library:OA TMS\_DB5\_67min\_V3.lib

SI:40 Formula: CAS:0-00-0 MolWeight:354 RetIndex:1495

CompName:Malic acid-13C4-3TMS ;

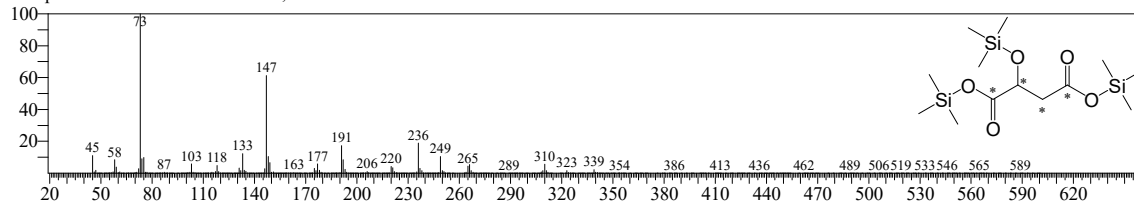

# TNAU

<< Target >>

Line#:7 R.Time:20.115(Scan#:3124) MassPeaks:339

RawMode:Averaged 20.110-20.120(3123-3125) BasePeak:281.05(1243)

BG Mode:Calc. from Peak Group 1 - Event 1 Q3 Scan

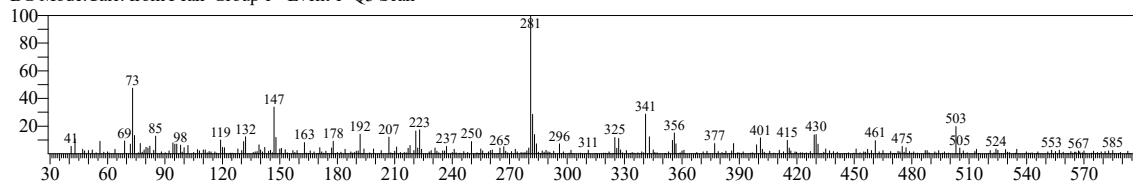

Hit#:1 Entry:402 Library:OA\_TMS\_DB5\_67min\_V3.lib

SI:44 Formula:C20H42O4Si4 CAS:775-01-9 MolWeight:458 RetIndex:1942

CompName:3,4-Dihydroxymandelic acid-4TMS ; 2-(3,4-dihydroxyphenyl)-2-hydroxyacetic acid

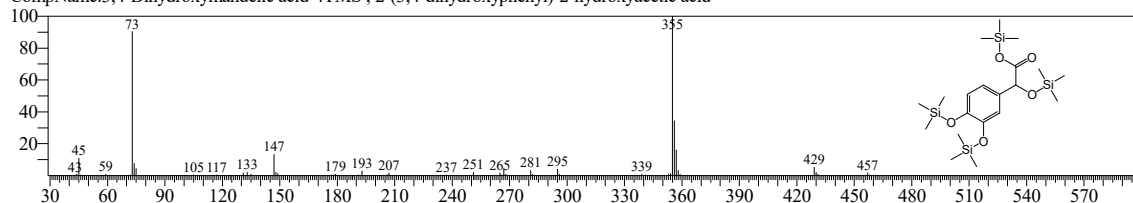

Hit#:2 Entry:413 Library:OA\_TMS\_DB5\_67min\_V3.lib

SI:39 Formula:C18H35NO3Si3 CAS:60-18-4 MolWeight:397 RetIndex:1958

CompName:Tyrosine-3TMS ; (2S)-2-amino-3-(4-hydroxyphenyl)propanoic acid

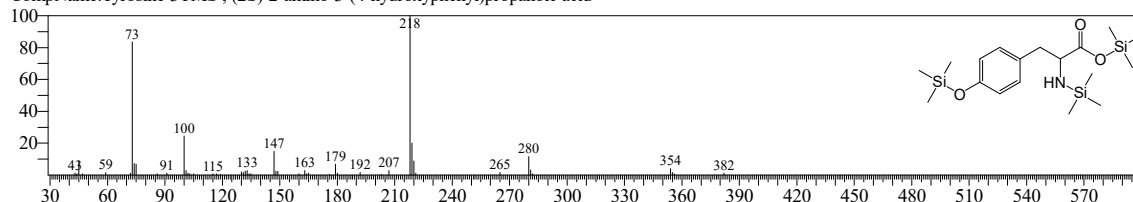

Hit#:3 Entry:328 Library:OA\_TMS\_DB5\_67min\_V3.lib

SI:39 Formula:C13H23NO2Si2 CAS:150-13-0 MolWeight:281 RetIndex:1845

CompName:4-Aminobenzoic acid-2TMS ; 4-aminobenzoic acid

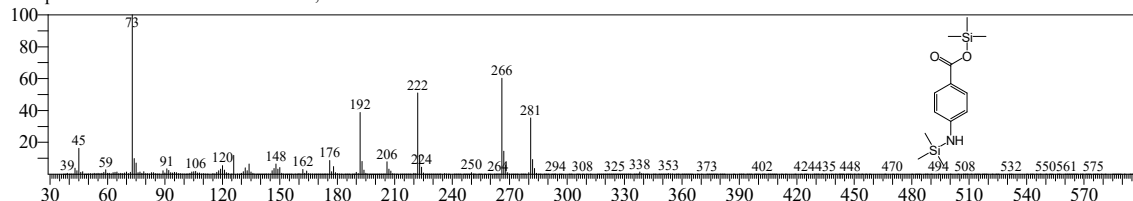

Hit#:4 Entry:384 Library:OA\_TMS\_DB5\_67min\_V3.lib

SI:38 Formula:C17H35NO3Si3 CAS:65-23-6 MolWeight:385 RetIndex:1919

CompName:Pyridoxine-3TMS ; 4,5-bis(hydroxymethyl)-2-methylpyridin-3-ol

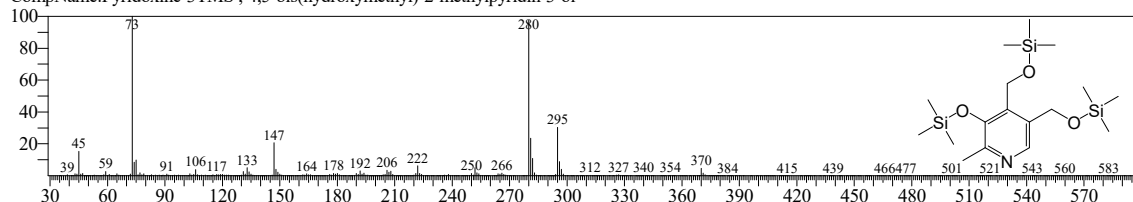

Hit#:5 Entry:184 Library:OA\_TMS\_DB5\_67min\_V3.lib

SI:37 Formula:C14H24O3Si2 CAS:614-75-5 MolWeight:296 RetIndex:1579

CompName:2-Hydroxyphenylacetic acid-2TMS ; 2-(2-hydroxyphenyl)acetic acid

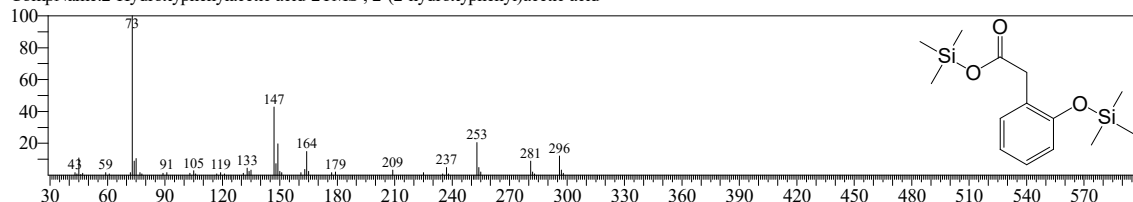



# TNAU

<< Target >>

Line#:8 R.Time:30.650(Scan#:5231) MassPeaks:302

RawMode:Averaged 30.645-30.655(5230-5232) BasePeak:207.00(1679)

BG Mode:Calc. from Peak Group 1 - Event 1 Q3 Scan

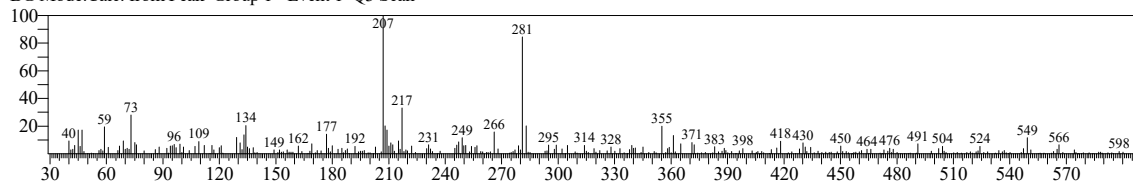

Hit#:1 Entry:535 Library:OA TMS DB5\_67min\_V3.lib

SI:38 Formula:C22H44N4O5Si4 CAS:58-63-9 MolWeight:556 RetIndex:2605

CompName:Inosine-4TMS ; 9-[(2R,3R,4S,5R)-3,4-dihydroxy-5-(hydroxymethyl)oxolan-2-yl]-3H-purin-6-one

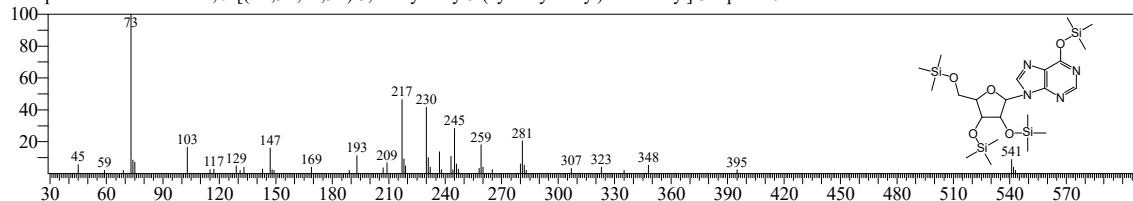

Hit#:2 Entry:548 Library:OA TMS DB5\_67min\_V3.lib

SI:38 Formula:C17H31N5O3SSi2 CAS:2457-80-9 MolWeight:441 RetIndex:2787

CompName:5'-Methylthioadenosine-2TMS ; (2R,3R,4S,5S)-2-(6-aminopurin-9-yl)-5-(methylsulfanylmethyl)oxolane-3,4-diol

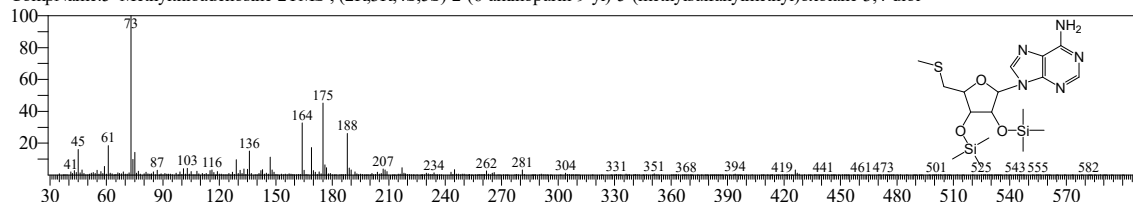

Hit#:3 Entry:328 Library:OA TMS DB5\_67min\_V3.lib

SI:37 Formula:C13H23NO2Si2 CAS:150-13-0 MolWeight:281 RetIndex:1845

CompName:4-Aminobenzoic acid-2TMS ; 4-aminobenzoic acid

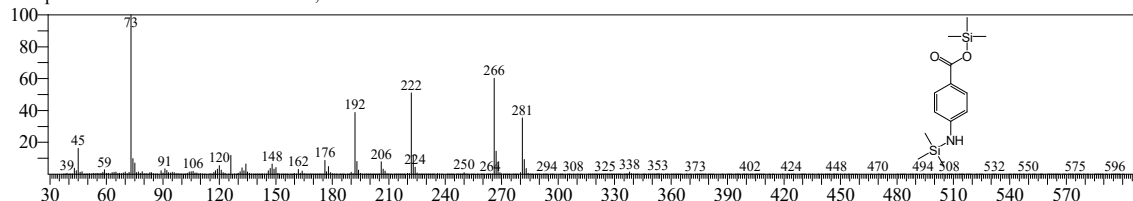

Hit#:4 Entry:343 Library:OA TMS DB5\_67min\_V3.lib

SI:37 Formula:C18H37NO3Si3 CAS:51-43-4 MolWeight:399 RetIndex:1868

CompName:Epinephrine-3TMS ; 4-[(1R)-1-hydroxy-2-(methylamino)ethyl]benzene-1,2-diol

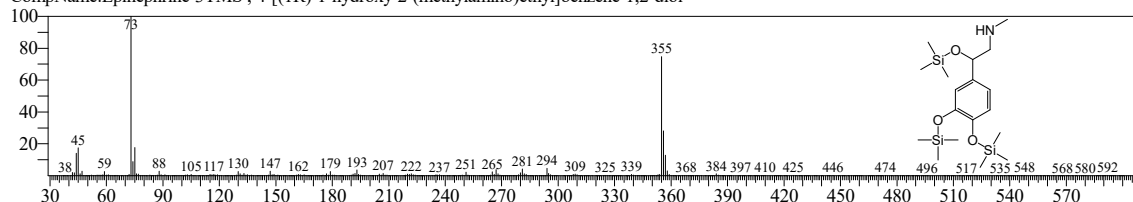

Hit#:5 Entry:528 Library:OA TMS DB5\_67min\_V3.lib

SI:36 Formula:C17H28Cl2N2O5Si2 CAS:56-75-7 MolWeight:466 RetIndex:2508

CompName:Chloramphenicol-2TMS ; 2,2-dichloro-N-[(1R,2R)-1,3-dihydroxy-1-(4-nitrophenyl)propan-2-yl]acetamide

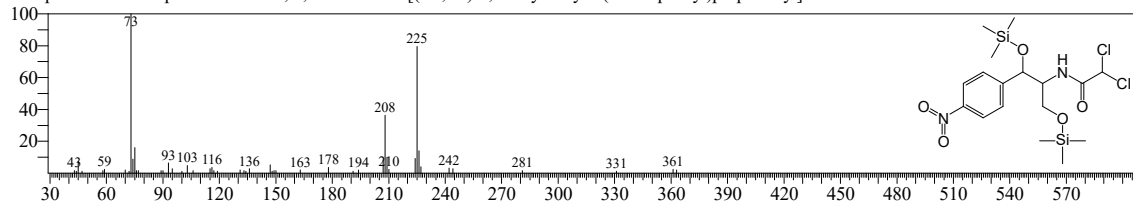

<< Target >>

Line#9 R.Time:31.420(Scan#:5385) MassPeaks:309

RawMode:Averaged 31.415-31.425(5384-5386) BasePeak:44.00(1086)

BG Mode:Calc. from Peak Group 1 - Event 1 Q3 Scan

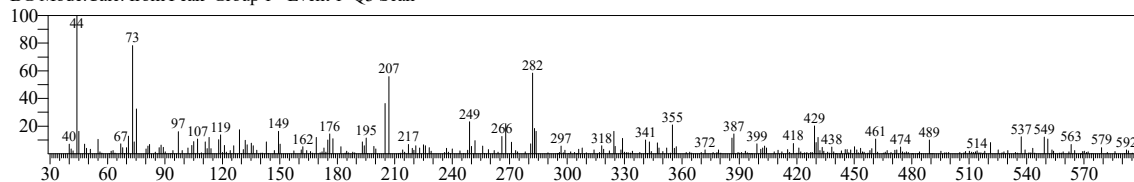

Hit#1 Entry:343 Library:OA TMS DB5\_67min\_V3.lib

SI:41 Formula:C18H37NO3Si3 CAS:51-43-4 MolWeight:399 RetIndex:1868

CompName:Epinephrine-3TMS ; 4-[(1R)-1-hydroxy-2-(methylamino)ethyl]benzene-1,2-diol

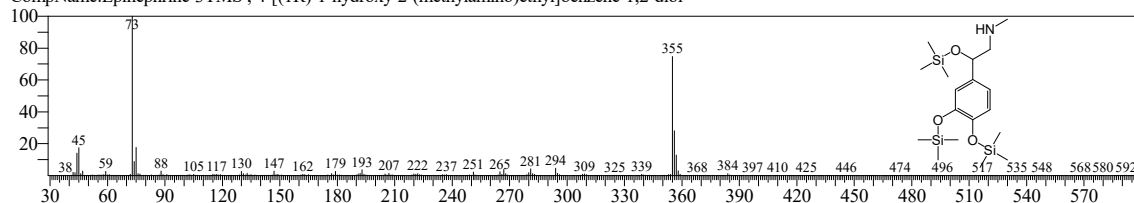

Hit#2 Entry:402 Library:OA TMS DB5\_67min\_V3.lib

SI:41 Formula:C20H42O4Si4 CAS:775-01-9 MolWeight:458 RetIndex:1942

CompName:3,4-Dihydroxymandelic acid-4TMS ; 2-(3,4-dihydroxyphenyl)-2-hydroxyacetic acid

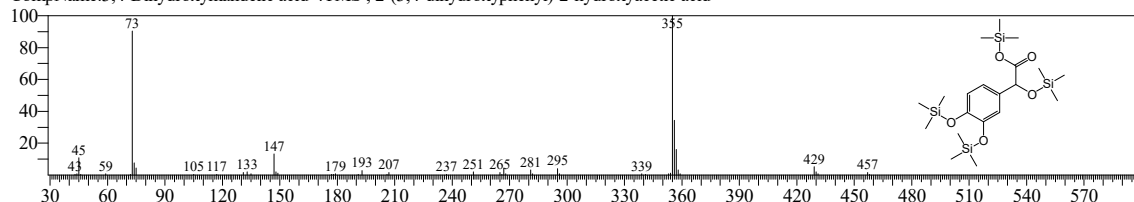

Hit#3 Entry:328 Library:OA TMS DB5\_67min\_V3.lib

SI:40 Formula:C13H23NO2Si2 CAS:150-13-0 MolWeight:281 RetIndex:1845

CompName:4-Aminobenzoic acid-2TMS ; 4-aminobenzoic acid

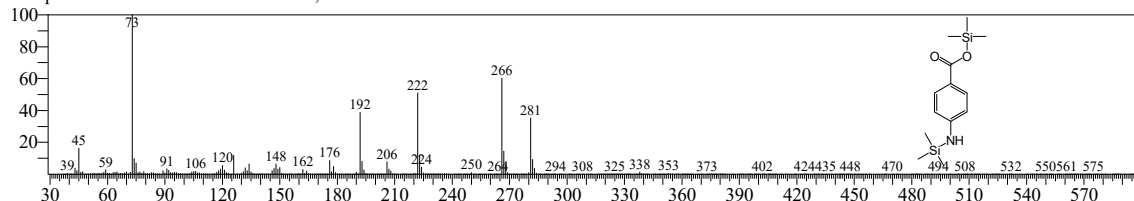

Hit#4 Entry:290 Library:OA TMS DB5\_67min\_V3.lib

SI:36 Formula:C13H23NO3Si2 CAS:548-93-6 MolWeight:297 RetIndex:1773

CompName:3-Hydroxyanthranilic acid-2TMS ; 2-amino-3-hydroxybenzoic acid

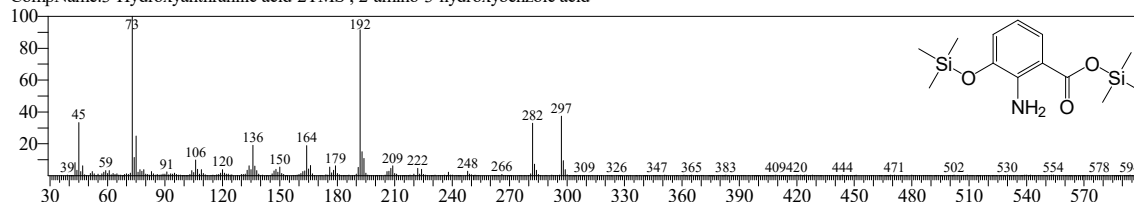

Hit#5 Entry:315 Library:OA TMS DB5\_67min\_V3.lib

SI:36 Formula:C16H30O4Si3 CAS:99-50-3 MolWeight:370 RetIndex:1833

CompName:Protocatechuic acid-3TMS ; 3,4-dihydroxybenzoic acid

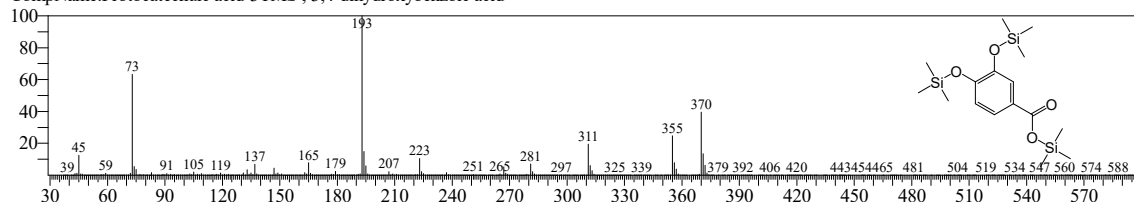

# TNAU

<< Target >>

Line#:10 R.Time:31.895(Scan#:5480) MassPeaks:307

RawMode:Averaged 31.890-31.900(5479-5481) BasePeak:139.15(1298)

BG Mode:Calc. from Peak Group 1 - Event 1 Q3 Scan

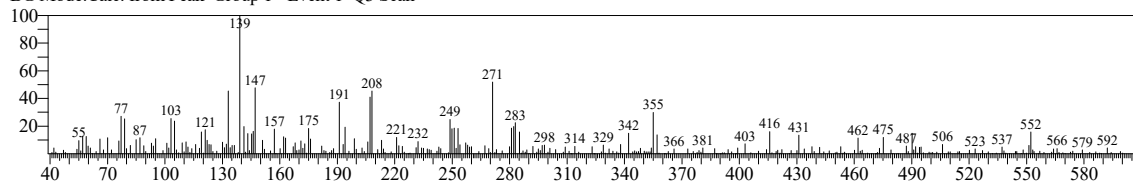

Hit#:1 Entry:100 Library:OA\_TMS\_DB5\_67min\_V3.lib

SI:28 Formula: CAS:0-00-0 MolWeight:264 RetIndex:1346

CompName:Fumaric acid-13C4-2TMS ;

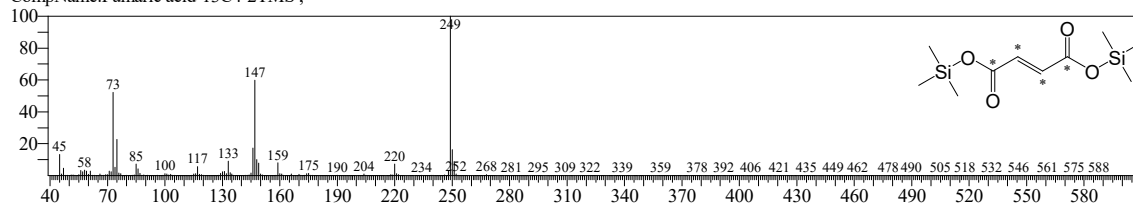

Hit#:2 Entry:38 Library:FA\_ME\_SP2560\_EI\_V3.lib

SI:27 Formula:C23H34O2 CAS:6217-54-5 MolWeight:342 RetIndex:3514

CompName:Methyl cis-4,7,10,13,16,19-Docosahexaenoate ; Docosa-4,7,10,13,16,19-hexaenoic acid

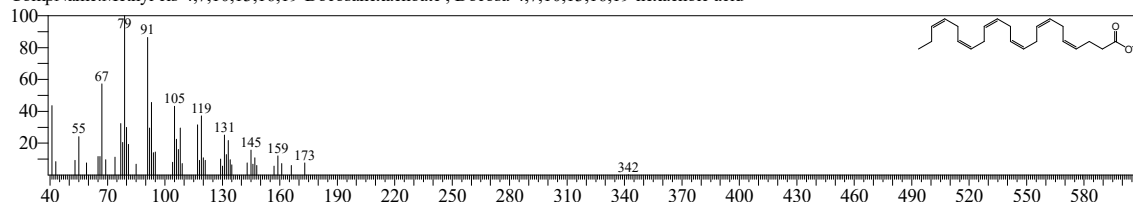

Hit#:3 Entry:23 Library:FA\_ME\_SP2560\_EI\_V3.lib

SI:27 Formula:C19H32O2 CAS:506-26-3 MolWeight:292 RetIndex:2852

CompName:Methyl gamma-linolenate ; Octadeca-6,9,12-trienoic acid

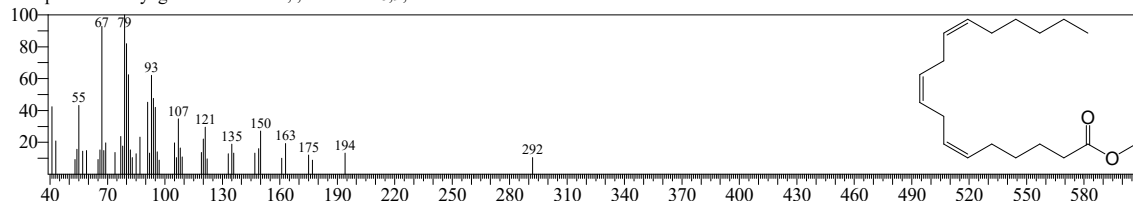

Hit#:4 Entry:9 Library:OA\_TMS\_DB5\_67min\_V3.lib

SI:26 Formula: CAS:0-00-0 MolWeight:237 RetIndex:1062

CompName:Lactic acid-13C3-2TMS ;

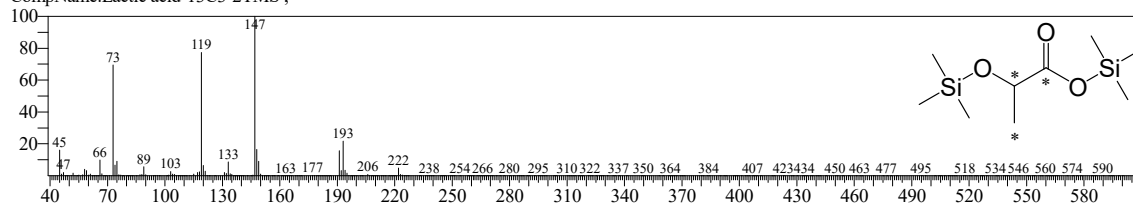

Hit#:5 Entry:33 Library:FA\_ME\_SP2560\_EI\_V3.lib

SI:25 Formula:C21H34O2 CAS:506-32-1 MolWeight:318 RetIndex:3109

CompName:Methyl arachidonate ; (5Z,8Z,11Z,14Z)-icosa-5,8,11,14-tetraenoic acid

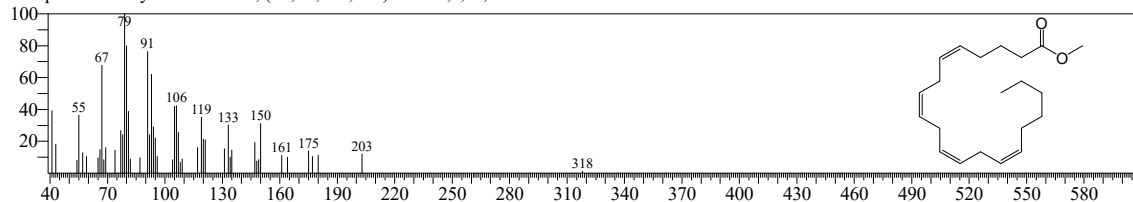

# TNAU

<< Target >>

Line#:11 R.Time:31.975(Scan#:5496) MassPeaks:290

RawMode:Averaged 31.970-31.980(5495-5497) BasePeak:207.05(1852)

BG Mode:Calc. from Peak Group 1 - Event 1 Q3 Scan

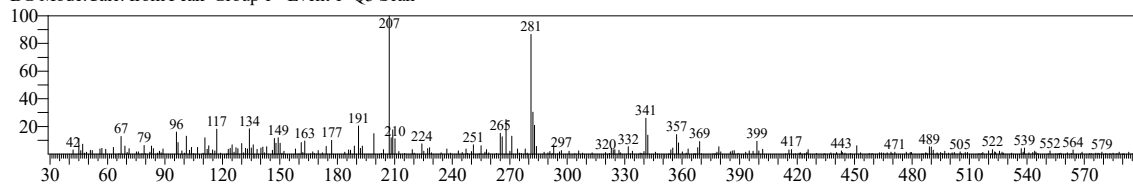

Hit#:1 Entry:203 Library:OA TMS DB5\_67min\_V3.lib

SI:31 Formula:C13H23NO2Si2 CAS:118-92-3 MolWeight:281 RetIndex:1623

CompName:Anthranilic acid-2TMS ; 2-aminobenzoic acid

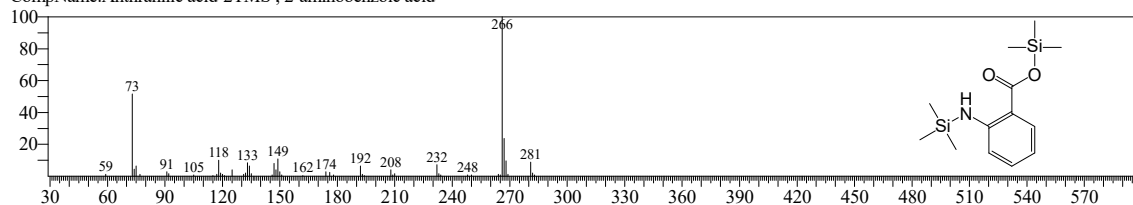

Hit#:2 Entry:310 Library:OA TMS DB5\_67min\_V3.lib

SI:31 Formula:C11H20N4OSi2 CAS:68-94-0 MolWeight:280 RetIndex:1822

CompName:Hypoxanthine-2TMS ; 3,7-dihydropurin-6-one

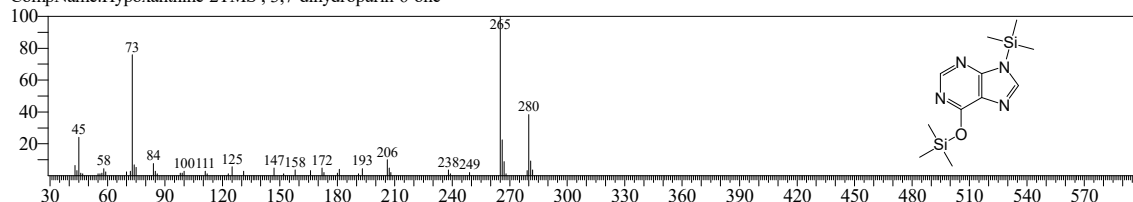

Hit#:3 Entry:35 Library:OA TMS DB5\_67min\_V3.lib

SI:27 Formula:C10H24O3Si2 CAS:300-85-6 MolWeight:248 RetIndex:1161

CompName:3-Hydroxybutyric acid-2TMS ; 3-hydroxybutanoic acid

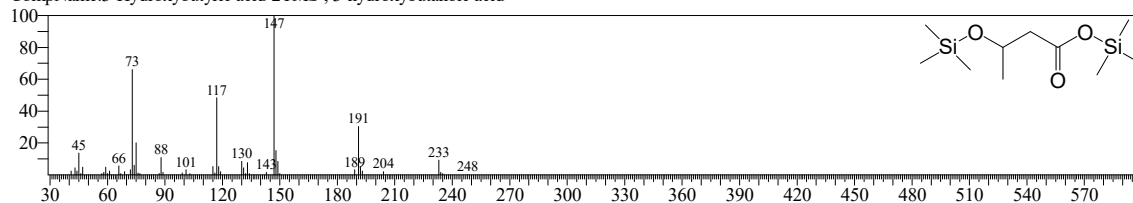

Hit#:4 Entry:479 Library:OA TMS DB5\_67min\_V3.lib

SI:26 Formula:C23H51NO3Si5 CAS:51-41-2 MolWeight:529 RetIndex:2191

CompName:Norepinephrine-5TMS ; 4-[(1R)-2-amino-1-hydroxyethyl]benzene-1,2-diol

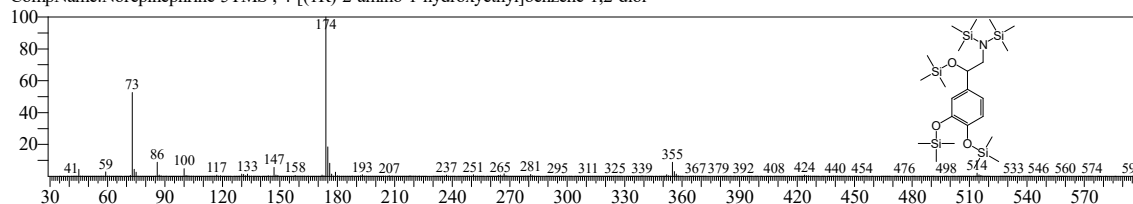

Hit#:5 Entry:25 Library:OA TMS DB5\_67min\_V3.lib

SI:26 Formula: C23H51NO3Si5 CAS:51-41-2 MolWeight:529 RetIndex:1130

CompName:2-Hydroxybutyric acid-d3-2TMS ;

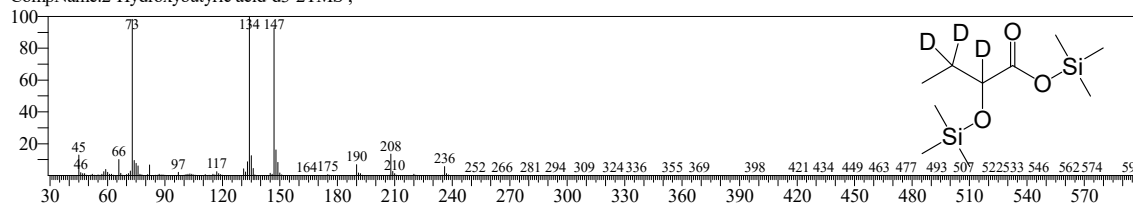

Supplement: Supplementary file 39 [file supplementary]
