# Supplementary material for: Comparative Metabolomics Profiling Reveals Key Metabolites and Associated Pathways Regulating Tuber Dormancy in White Yam (<em>Dioscorea rotundata</em>)
Source: Preprints.org preprint supplement (doi:10.20944/preprints202303.0378.v1), 2023-03-21

# TNAU

## Sample Information

Analyzed by : Admin  
 Analyzed : 04-Aug-22 6:12:21 PM  
 Sample Type : Unknown  
 Level # : 1  
 Sample Name : C42-2  
 Sample ID : C42-2  
 IS Amount : [1]=1  
 Sample Amount : 1  
 Dilution Factor : 1  
 Vial # : 3  
 Injection Volume : 1.00  
 Data File : D:\GCMS-8040NX\Aug 2022\Users\04.08.2022\Data files\04082022-003.qgd  
 Org Data File : D:\GCMS-8040NX\Aug 2022\Users\04.08.2022\Data files\04082022-003.qgd  
 Method File : D:\GCMS-8040NX\Aug 2022\Users\04.08.2022\Method file\27072022\_methodfile.qgm  
 Org Method File : D:\GCMS-8040NX\Aug 2022\Users\04.08.2022\Method file\27072022\_methodfile.qgm  
 Report File :  
 Tuning File : D:\GCMS-8040NX\Aug 2022\Tuning Data\TUNING 04082022.qgt  
 [Comment]  
 Jerry samples  
 Modified by : Admin  
 Modified : 05-Aug-22 4:11:12 PM

Chromatogram C42-2 D:\GCMS-8040NX\Aug 2022\Users\04.08.2022\Data files\04082022-003.qgd

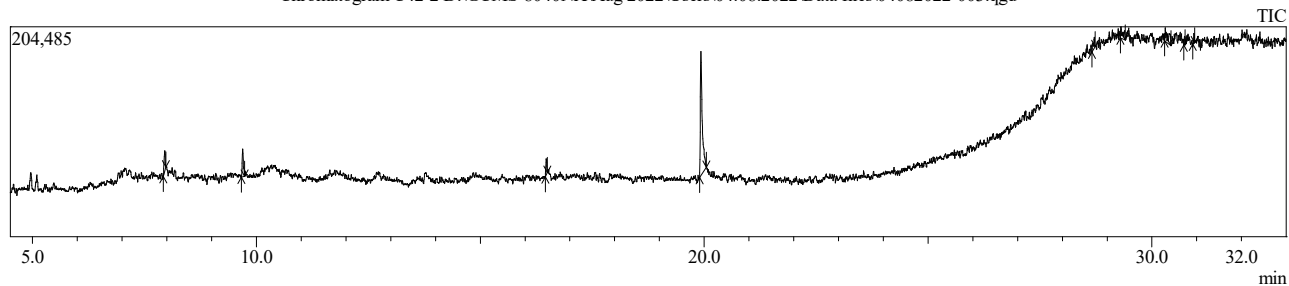

Peak Report TIC

| Peak# | R.Time | Area   | Area%  | Height | Height% | A/H  | Similarity | Name                                          |
|-------|--------|--------|--------|--------|---------|------|------------|-----------------------------------------------|
| 1     | 7.953  | 36448  | 6.01   | 19595  | 8.30    | 1.86 | 82         | Tridecane                                     |
| 2     | 9.693  | 51131  | 8.43   | 27060  | 11.46   | 1.89 | 86         | Undecane                                      |
| 3     | 16.472 | 23172  | 3.82   | 15390  | 6.52    | 1.51 | 86         | 2,2,4-Trimethyl-1,3-pentanediol diisobutyrate |
| 4     | 19.927 | 360645 | 59.49  | 120866 | 51.19   | 2.98 | 98         | Dimethyl palmitamine                          |
| 5     | 28.713 | 25325  | 4.18   | 10609  | 4.49    | 2.39 | 29         | Glutaric acid-2TMS                            |
| 6     | 29.308 | 34739  | 5.73   | 11011  | 4.66    | 3.15 | 35         | 3-Hydroxybenzoic acid-2TMS                    |
| 7     | 30.299 | 55908  | 9.22   | 13482  | 5.71    | 4.15 | 27         | Trehalose-8TMS                                |
| 8     | 30.727 | 8179   | 1.35   | 8366   | 3.54    | 0.98 | 35         | Inosine-4TMS                                  |
| 9     | 30.937 | 10662  | 1.76   | 9729   | 4.12    | 1.10 | 35         | Galactose-5TMS(1)                             |
|       |        | 606209 | 100.00 | 236108 | 100.00  |      |            |                                               |

Library

# TNAU

<< Target >>

Line#:1 R.Time:7.955(Scan#:692) MassPeaks:283

RawMode:Averaged 7.950-7.960(691-693) BasePeak:57.10(4299)

BG Mode:Calc. from Peak Group 1 - Event 1 Q3 Scan

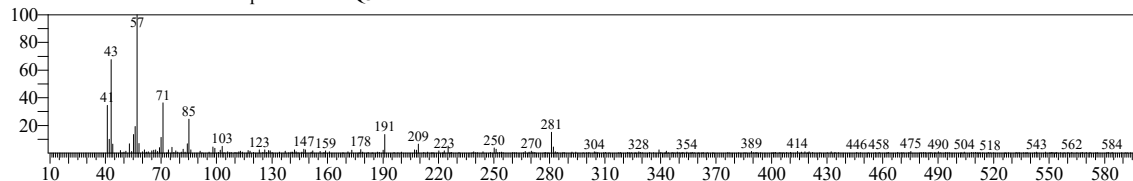

Hit#:1 Entry:40226 Library:NIST20M1.lib

SI:82 Formula:C13H28 CAS:629-50-5 MolWeight:184 RetIndex:1300

CompName:Tridecane \$\$ n-Tridecane \$\$ Tridecane, n-

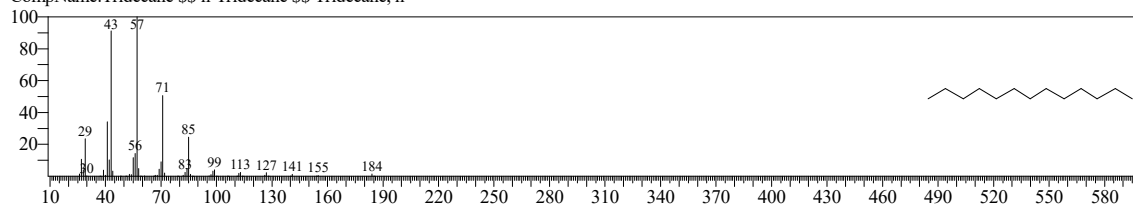

Hit#:2 Entry:21042 Library:NIST20M1.lib

SI:82 Formula:C11H24 CAS:1120-21-4 MolWeight:156 RetIndex:1100

CompName:Undecane \$\$ n-Undecane \$\$ Hendecane \$\$ n-C11H24 \$\$ UN 2330

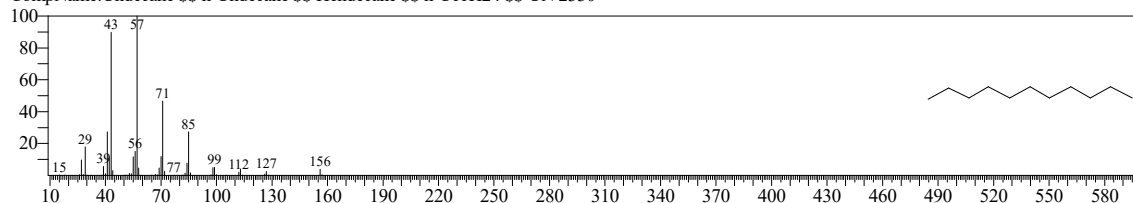

Hit#:3 Entry:30057 Library:NIST20M1.lib

SI:82 Formula:C12H26 CAS:112-40-3 MolWeight:170 RetIndex:1200

CompName:Dodecane \$\$ n-Dodecane \$\$ Adakane 12 \$\$ Ba 51-090453 \$\$ CH3(CH2)10CH3 \$\$ Bihexyl \$\$ Dihexyl \$\$ Duodecane \$\$ NSC 8714

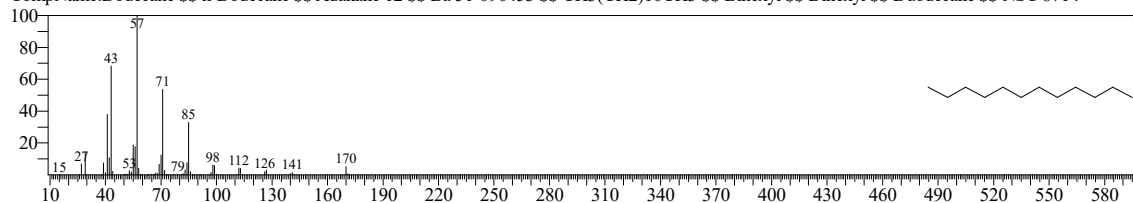

Hit#:4 Entry:40255 Library:NIST20M1.lib

SI:81 Formula:C13H28 CAS:62108-21-8 MolWeight:184 RetIndex:1185

CompName:Decane, 6-ethyl-2-methyl- \$\$ 6-Ethyl-2-methyldecane #

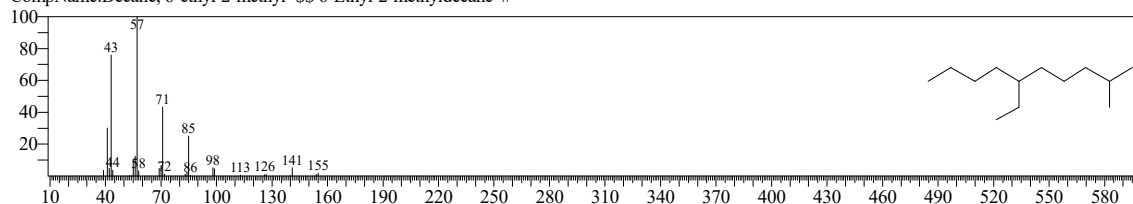

Hit#:5 Entry:9444 Library:NIST20R.lib

SI:81 Formula:C10H22 CAS:124-18-5 MolWeight:142 RetIndex:1000

CompName:Decane \$\$ n-Decane \$\$ n-C10H22 \$\$ UN 2247

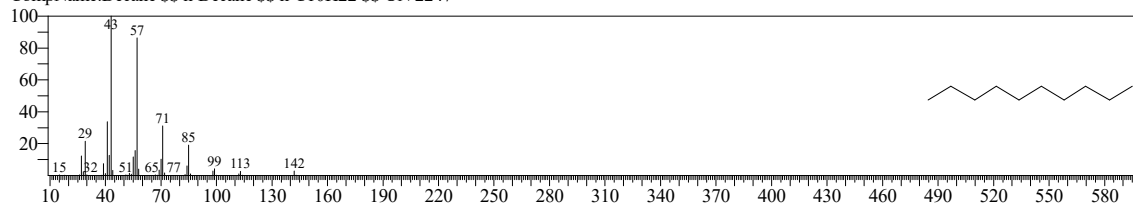

# TNAU

<< Target >>

Line# 2 R.Time: 9.695 (Scan#: 1040) MassPeaks: 359

RawMode: Averaged 9.690-9.700 (1039-1041) BasePeak: 57.10 (5156)

BG Mode: Calc. from Peak Group 1 - Event 1 Q3 Scan

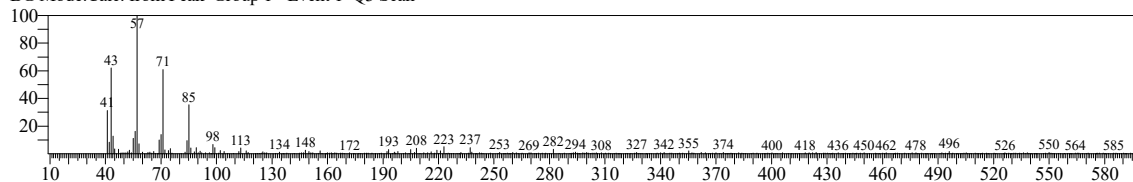

Hit#: 1 Entry: 21042 Library: NIST20M1.lib

SI: 86 Formula: C<sub>11</sub>H<sub>24</sub> CAS: 1120-21-4 MolWeight: 156 RetIndex: 1100

CompName: Undecane \$\$ n-Undecane \$\$ Hendecane \$\$ n-C<sub>11</sub>H<sub>24</sub> \$\$ UN 2330

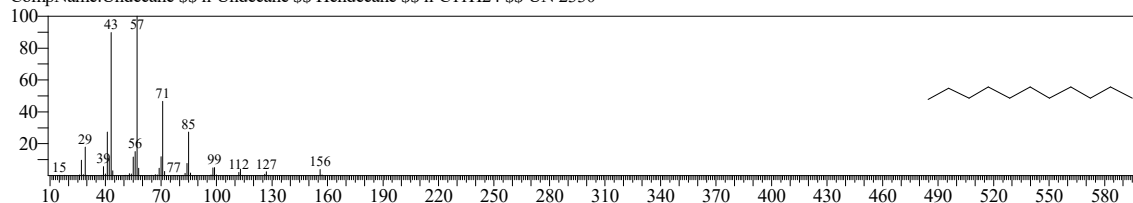

Hit#: 2 Entry: 30057 Library: NIST20M1.lib

SI: 86 Formula: C<sub>12</sub>H<sub>26</sub> CAS: 112-40-3 MolWeight: 170 RetIndex: 1200

CompName: Dodecane \$\$ n-Dodecane \$\$ Adakane 12 \$\$ Ba 51-090453 \$\$ CH<sub>3</sub>(CH<sub>2</sub>)<sub>10</sub>CH<sub>3</sub> \$\$ Bihexyl \$\$ Dihexyl \$\$ Duodecane \$\$ NSC 8714

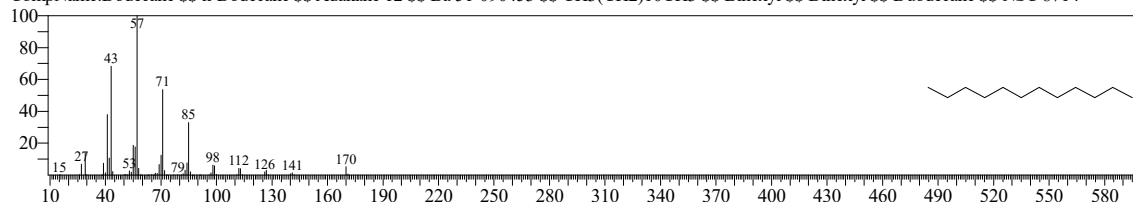

Hit#: 3 Entry: 21047 Library: NIST20M1.lib

SI: 85 Formula: C<sub>11</sub>H<sub>24</sub> CAS: 17302-32-8 MolWeight: 156 RetIndex: 986

CompName: Nonane, 3,7-dimethyl- \$\$ 3,7-Dimethylnonane

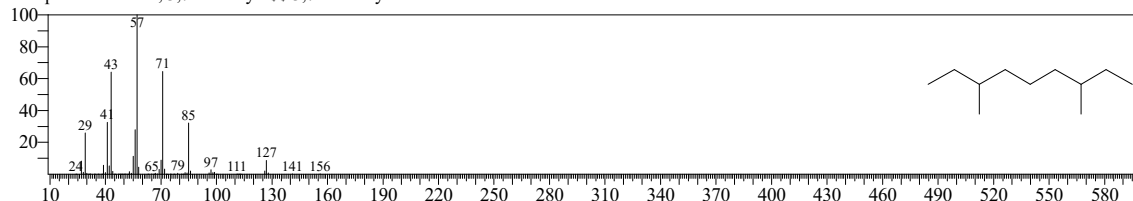

Hit#: 4 Entry: 30051 Library: NIST20M1.lib

SI: 85 Formula: C<sub>12</sub>H<sub>26</sub> CAS: 17312-53-7 MolWeight: 170 RetIndex: 1086

CompName: Decane, 3,6-dimethyl- \$\$ 3,6-Dimethyldecane

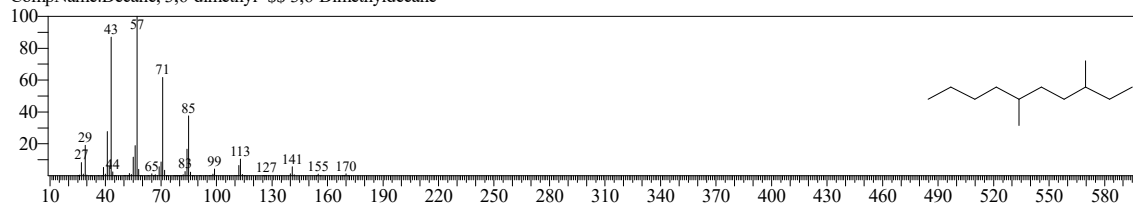

Hit#: 5 Entry: 22497 Library: NIST20R.lib

SI: 85 Formula: C<sub>14</sub>H<sub>30</sub> CAS: 629-59-4 MolWeight: 198 RetIndex: 1400

CompName: Tetradecane \$\$ n-Tetradecane

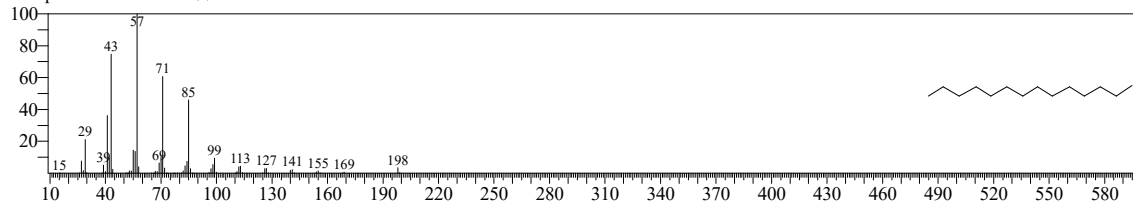

# TNAU

<< Target >>

Line#3 R.Time:16.470(Scan#:2395) MassPeaks:268

RawMode:Averaged 16.465-16.475(2394-2396) BasePeak:71.00(6976)

BG Mode:Calc. from Peak Group 1 - Event 1 Q3 Scan

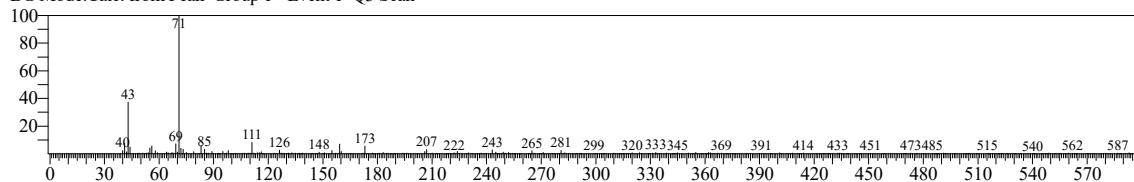

Hit#1 Entry:34622 Library:NIST20R.lib

SI:86 Formula:C16H30O4 CAS:6846-50-0 MolWeight:286 RetIndex:1605

CompName:2,2,4-Trimethyl-1,3-pentanediol diisobutyrate \$\$ Propanoic acid, 2-methyl-, 2,2-dimethyl-1-(1-methylethyl)-1,3-propanediyl ester \$\$ 1,3-Pentan

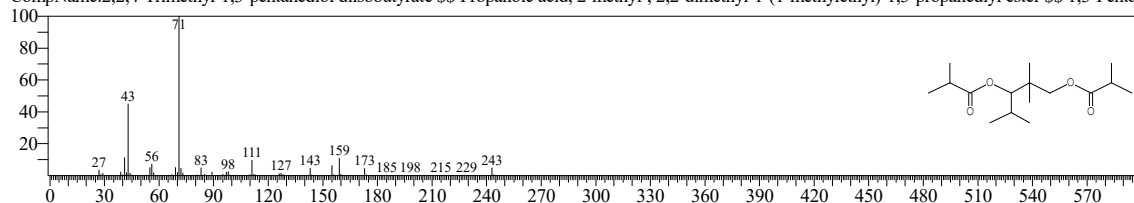

Hit#2 Entry:146809 Library:NIST20M1.lib

SI:81 Formula:C16H30O4 CAS:0-00-0 MolWeight:286 RetIndex:1605

CompName:Pentanoic acid, 2,2,4-trimethyl-3-carboxyisopropyl, isobutyl ester \$\$ 1-Isobutyl 4-isopropyl 3-isopropyl-2,2-dimethylsuccinate #

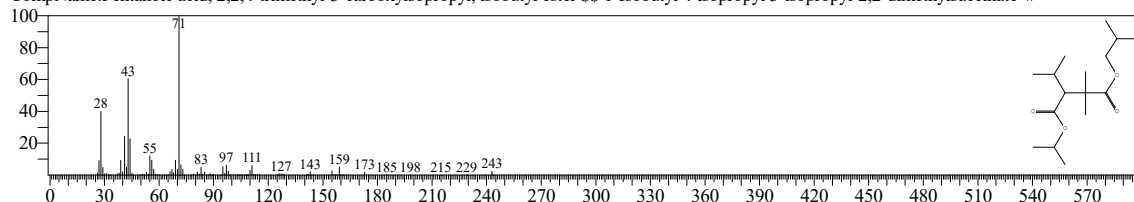

Hit#3 Entry:20598 Library:NIST20M1.lib

SI:80 Formula:C8H12O3 CAS:19680-00-3 MolWeight:156 RetIndex:1316

CompName:Tetrahydro[2,2']bifuranyl-5-one

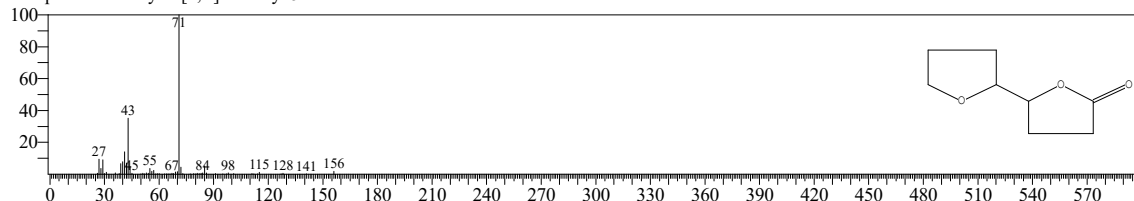

Hit#4 Entry:21815 Library:NIST20M1.lib

SI:78 Formula:C8H14O3 CAS:106-31-0 MolWeight:158 RetIndex:1120

CompName:Butanoic acid, anhydride \$\$ Butyric anhydride \$\$ n-Butyric acid anhydride \$\$ n-Butyric anhydride \$\$ Butanoic anhydride \$\$ Butyric acid anhy

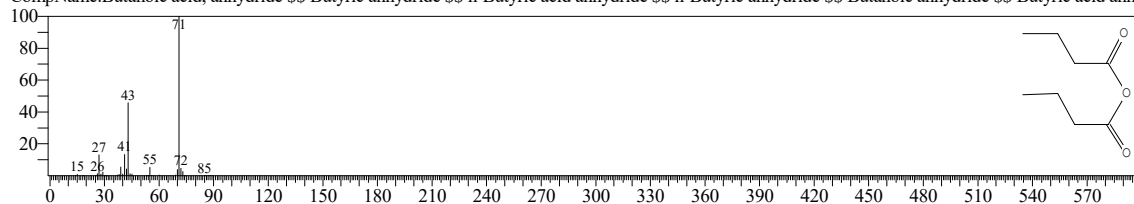

Hit#5 Entry:7968 Library:NIST20M1.lib

SI:78 Formula:C8H16O CAS:1004-29-1 MolWeight:128 RetIndex:948

CompName:Furan, 2-butyltetrahydro- \$\$ Octane, 1,4-epoxy- \$\$ 2-Butyltetrahydrofuran

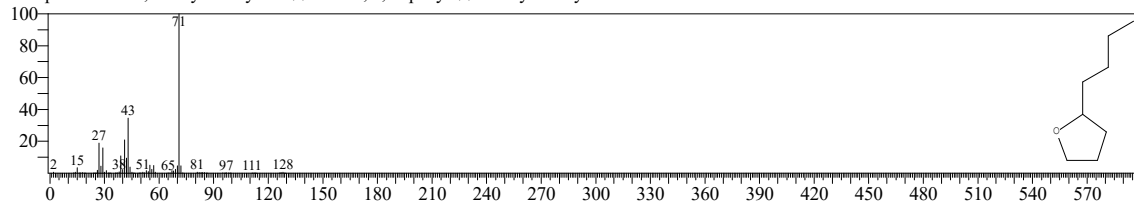

# TNAU

<< Target >>

Line#:4 R.Time:19.925(Scan#:3086) MassPeaks:284

RawMode:Averaged 19.920-19.930(3085-3087) BasePeak:58.10(89028)

BG Mode:Calc. from Peak Group 1 - Event 1 Q3 Scan

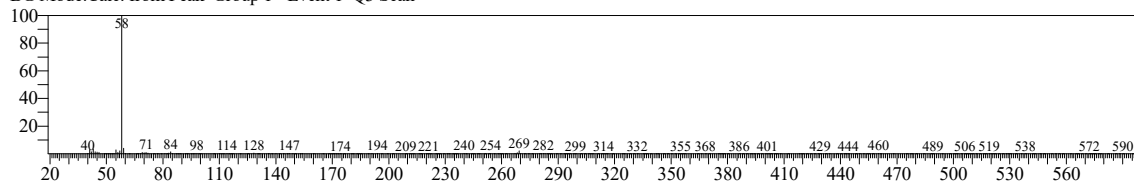

Hit#:1 Entry:32974 Library:NIST20R.lib

SI:98 Formula:C18H39N CAS:112-69-6 MolWeight:269 RetIndex:1860

CompName:Dimethyl palmitamine \$\$ 1-Hexadecanamine, N,N-dimethyl- \$\$ Cetyldimethylamine \$\$ Armeen DM 16D \$\$ Dimethyl-n-hexadecylamine \$\$ D

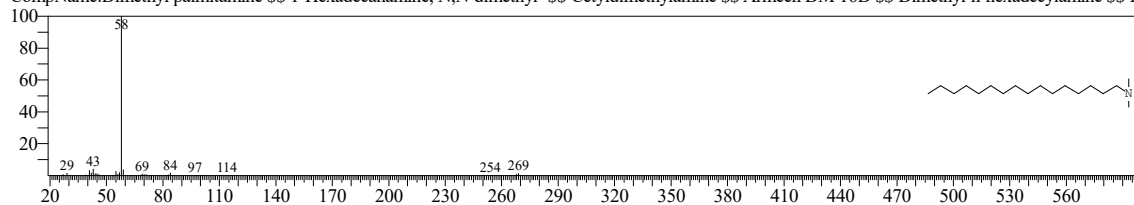

Hit#:2 Entry:110833 Library:NIST20M1.lib

SI:97 Formula:C17H37N CAS:17678-60-3 MolWeight:255 RetIndex:1760

CompName:1-Pentadecanamine, N,N-dimethyl- \$\$ N,N-Dimethyl-1-pentadecanamine #

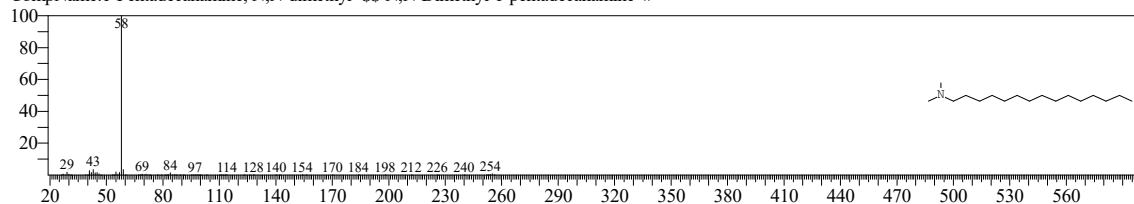

Hit#:3 Entry:143326 Library:NIST20M1.lib

SI:96 Formula:C19H41N CAS:3002-57-1 MolWeight:283 RetIndex:1959

CompName:1-Heptadecanamine, N,N-dimethyl- \$\$ N,N-Dimethyl-1-heptadecanamine #

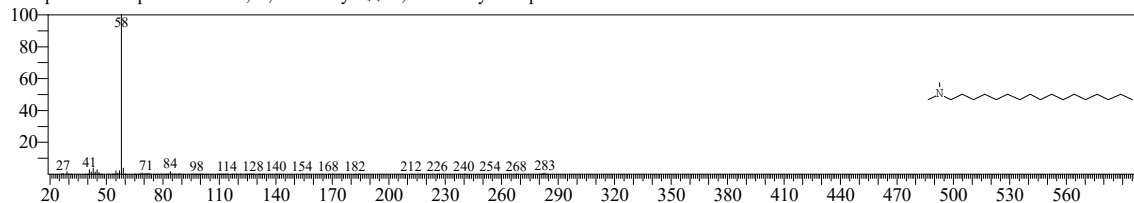

Hit#:4 Entry:176597 Library:NIST20M1.lib

SI:96 Formula:C21H45N CAS:49859-87-2 MolWeight:311 RetIndex:2158

CompName:1-Nonadecanamine, N,N-dimethyl- \$\$ N,N-Dimethyl-1-nonadecanamine #

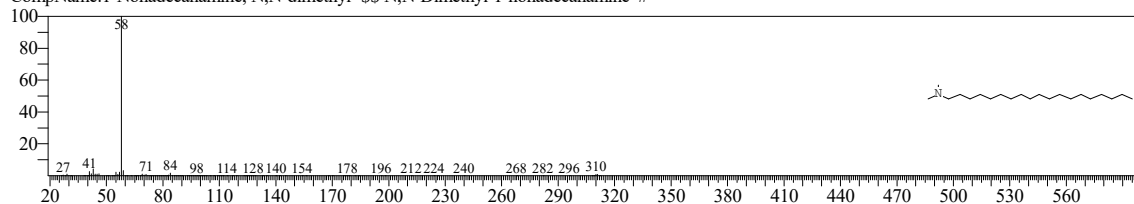

Hit#:5 Entry:160142 Library:NIST20M1.lib

SI:96 Formula:C20H43N CAS:124-28-7 MolWeight:297 RetIndex:2058

CompName:Dimantine \$\$ 1-Octadecanamine, N,N-dimethyl- \$\$ Octadecylamine, N,N-dimethyl- \$\$ Armeen DM 18D \$\$ Armine DM18D \$\$ Dimethyl-n-oc

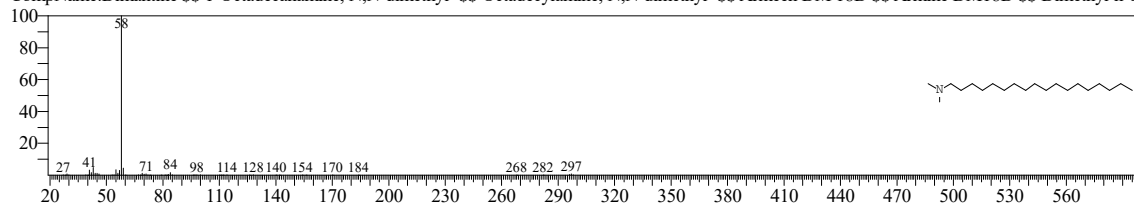

# TNAU

<< Target >>

Line#:5 R.Time:28.715(Scan#:4844) MassPeaks:315

RawMode:Averaged 28.710-28.720(4843-4845) BasePeak:281.05(1817)

BG Mode:Calc. from Peak Group 1 - Event 1 Q3 Scan

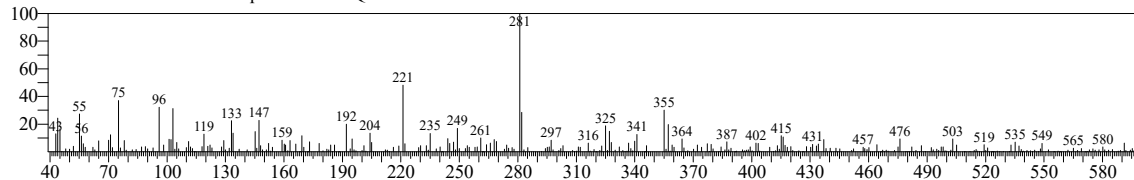

Hit#:1 Entry:115 Library:OA\_TMS\_DB5\_67min\_V3.lib

SI:29 Formula:C11H24O4Si2 CAS:110-94-1 MolWeight:276 RetIndex:1403

CompName:Glutaric acid-2TMS ; pentanedioic acid

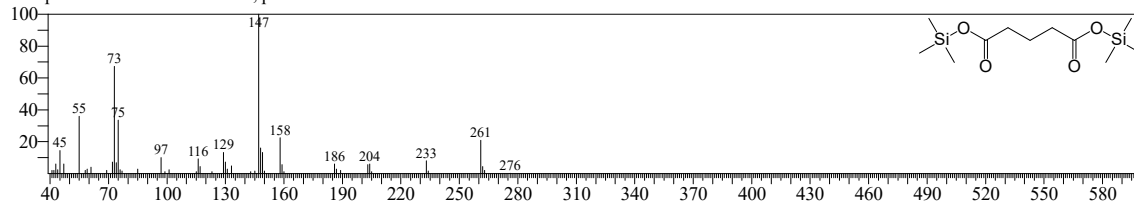

Hit#:2 Entry:477 Library:OA\_TMS\_DB5\_67min\_V3.lib

SI:29 Formula:C21H46OSi CAS:112-92-5 MolWeight:342 RetIndex:2156

CompName:Octadecanol-TMS ; octadecan-1-ol

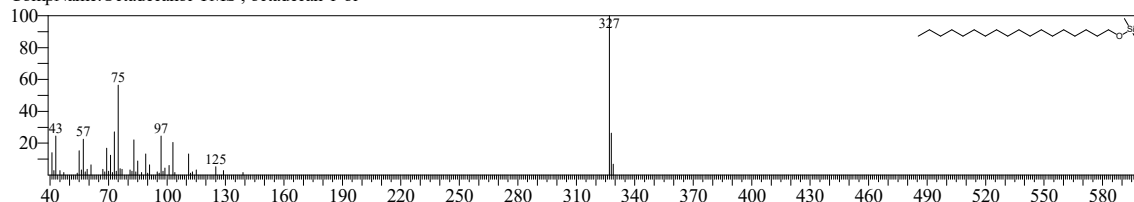

Hit#:3 Entry:402 Library:OA\_TMS\_DB5\_67min\_V3.lib

SI:28 Formula:C20H42O4Si4 CAS:775-01-9 MolWeight:458 RetIndex:1942

CompName:3,4-Dihydroxymandelic acid-4TMS ; 2-(3,4-dihydroxyphenyl)-2-hydroxyacetic acid

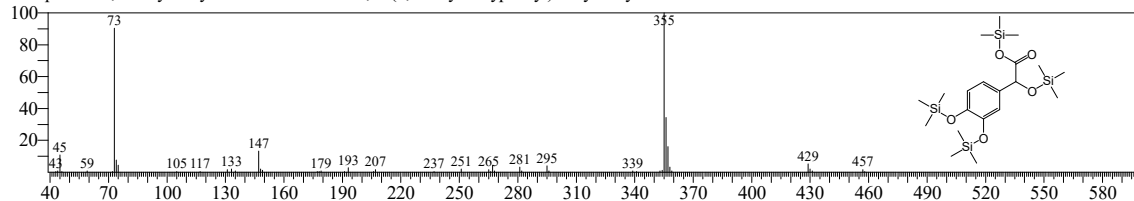

Hit#:4 Entry:100 Library:OA\_TMS\_DB5\_67min\_V3.lib

SI:28 Formula: CAS:0-00-0 MolWeight:264 RetIndex:1346

CompName:Fumaric acid-13C4-2TMS ;

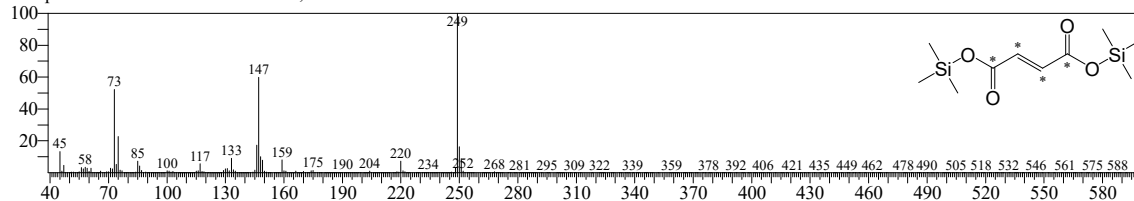

Hit#:5 Entry:30 Library:OA\_TMS\_DB5\_67min\_V3.lib

SI:28 Formula:C9H22O3Si2 CAS:503-66-2 MolWeight:234 RetIndex:1145

CompName:3-Hydroxypropionic acid-2TMS ; 3-hydroxypropanoic acid

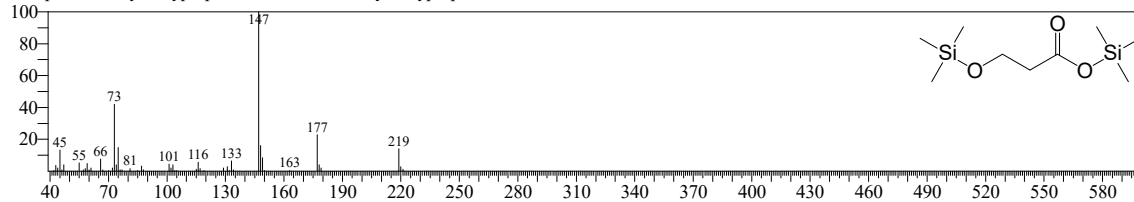

<< Target >>

Line#:6 R.Time:29.310(Scan#:4963) MassPeaks:324

RawMode:Averaged 29.305-29.315(4962-4964) BasePeak:207.05(2184)

BG Mode:Calc. from Peak Group 1 - Event 1 Q3 Scan

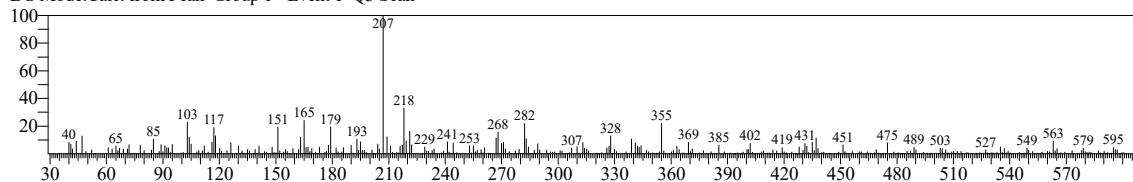

Hit#:1 Entry:179 Library:OA\_TMS\_DB5\_67min\_V3.lib

SI:35 Formula:C<sub>13</sub>H<sub>22</sub>O<sub>3</sub>Si<sub>2</sub> CAS:99-06-9 MolWeight:282 RetIndex:1572

CompName:3-Hydroxybenzoic acid-2TMS ; 3-hydroxybenzoic acid

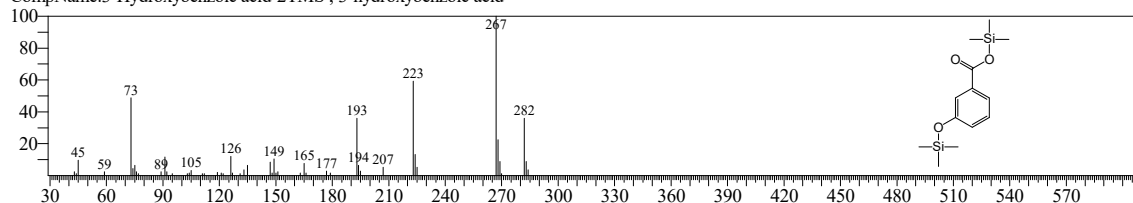

Hit#:2 Entry:211 Library:OA\_TMS\_DB5\_67min\_V3.lib

SI:33 Formula:C<sub>13</sub>H<sub>22</sub>O<sub>3</sub>Si<sub>2</sub> CAS:99-96-7 MolWeight:282 RetIndex:1636

CompName:4-Hydroxybenzoic acid-2TMS ; 4-hydroxybenzoic acid

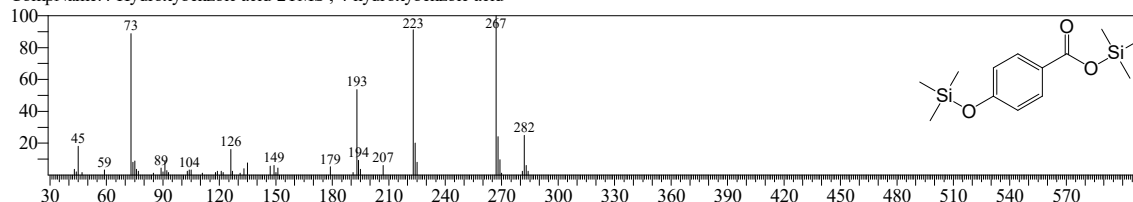

Hit#:3 Entry:463 Library:OA\_TMS\_DB5\_67min\_V3.lib

SI:31 Formula:C<sub>21</sub>H<sub>43</sub>NO<sub>4</sub>Si<sub>4</sub> CAS:59-92-7 MolWeight:485 RetIndex:2123

CompName:Dopa-4TMS ; (2S)-2-amino-3-(3,4-dihydroxyphenyl)propanoic acid

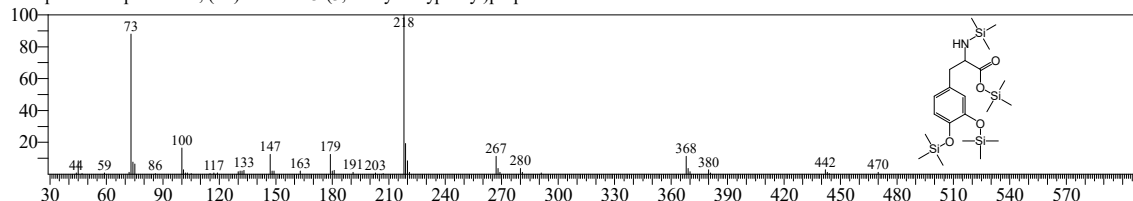

Hit#:4 Entry:413 Library:OA\_TMS\_DB5\_67min\_V3.lib

SI:30 Formula:C<sub>18</sub>H<sub>35</sub>NO<sub>3</sub>Si<sub>3</sub> CAS:60-18-4 MolWeight:397 RetIndex:1958

CompName:Tyrosine-3TMS ; (2S)-2-amino-3-(4-hydroxyphenyl)propanoic acid

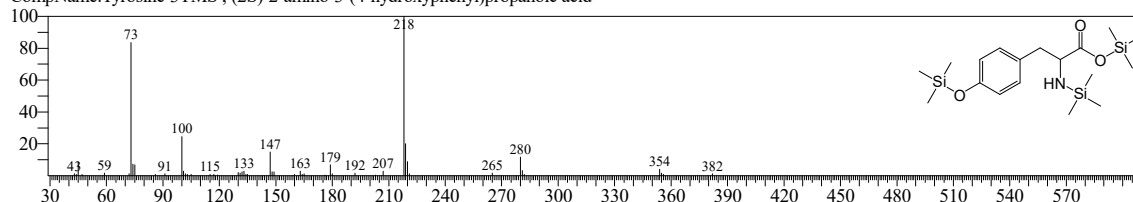

Hit#:5 Entry:315 Library:OA\_TMS\_DB5\_67min\_V3.lib

SI:28 Formula:C<sub>16</sub>H<sub>30</sub>O<sub>4</sub>Si<sub>3</sub> CAS:99-50-3 MolWeight:370 RetIndex:1833

CompName:Protocatechuic acid-3TMS ; 3,4-dihydroxybenzoic acid

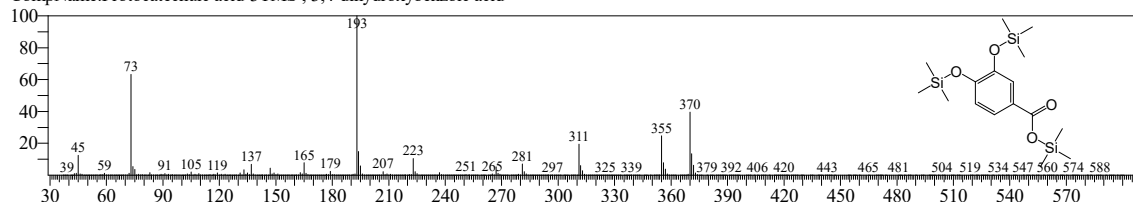

<< Target >>

Line#:7 R.Time:30.300(Scan#:5161) MassPeaks:314

RawMode:Averaged 30.295-30.305(5160-5162) BasePeak:281.05(1892)

BG Mode:Calc. from Peak Group 1 - Event 1 Q3 Scan

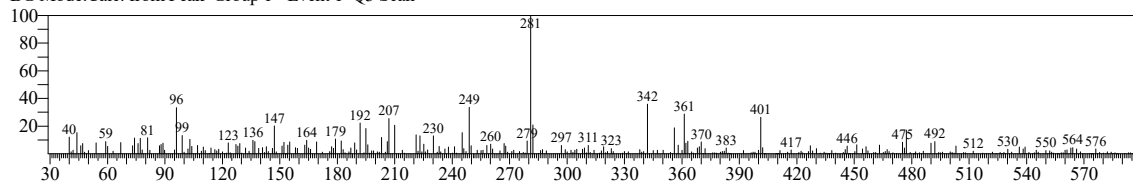

Hit#:1 Entry:552 Library:OA\_TMS\_DB5\_67min\_V3.lib

SI:27 Formula:C36H86O11Si8 CAS:99-20-7 MolWeight:918 RetIndex:2812

CompName:Trehalose-8TMS ; (2R,3S,4S,5R,6R)-2-(hydroxymethyl)-6-[(2R,3R,4S,5S,6R)-3,4,5-trihydroxy-6-(hydroxymethyl)oxan-2-yl]oxyoxane-

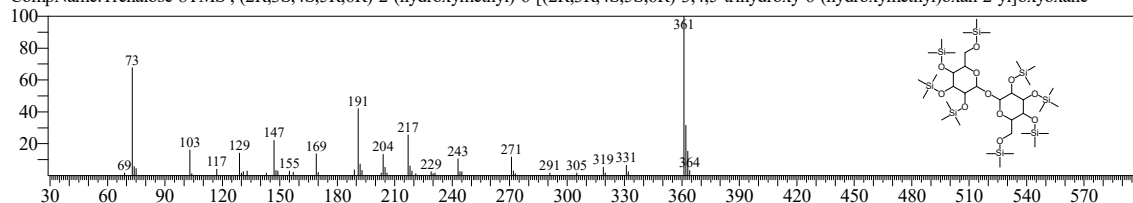

Hit#:2 Entry:382 Library:OA\_TMS\_DB5\_67min\_V3.lib

SI:25 Formula:C18H34O4Si3 CAS:6482-98-0 MolWeight:398 RetIndex:1918

CompName:4-Hydroxyphenyllactic acid-3TMS ; 2-hydroxy-3-(4-hydroxyphenyl)propanoate

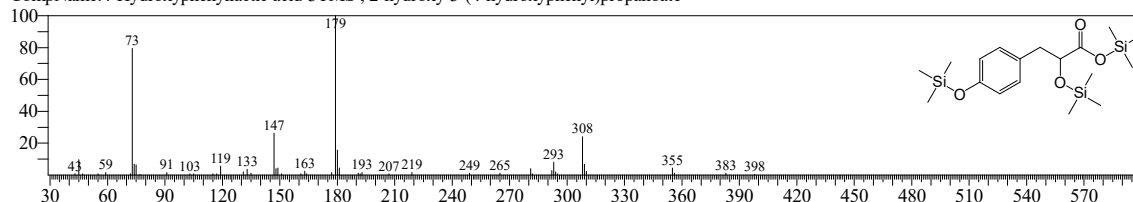

Hit#:3 Entry:560 Library:OA\_TMS\_DB5\_67min\_V3.lib

SI:24 Formula:C37H89NO11Si8 CAS:499-40-1 MolWeight:947 RetIndex:2947

CompName:Isomaltose-meto-8TMS (1) ; (3R,4S,5S,6R)-6-[[[(2S,3R,4S,5S,6R)-3,4,5-trihydroxy-6-(hydroxymethyl)oxan-2-yl]oxymethyl]oxane-2,3,

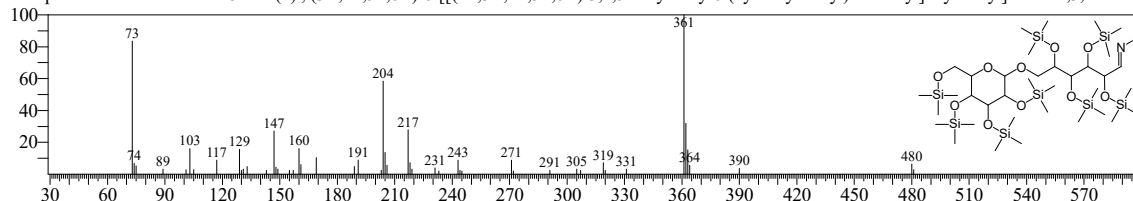

Hit#:4 Entry:559 Library:OA\_TMS\_DB5\_67min\_V3.lib

SI:24 Formula:C39H96O11Si9 CAS:585-88-6 MolWeight:992 RetIndex:2923

CompName:Maltitol-9TMS ; (2S,3R,4R,5R)-4-[(2R,3R,4S,5S,6R)-3,4,5-trihydroxy-6-(hydroxymethyl)oxan-2-yl]oxyhexane-1,2,3,5,6-pentol

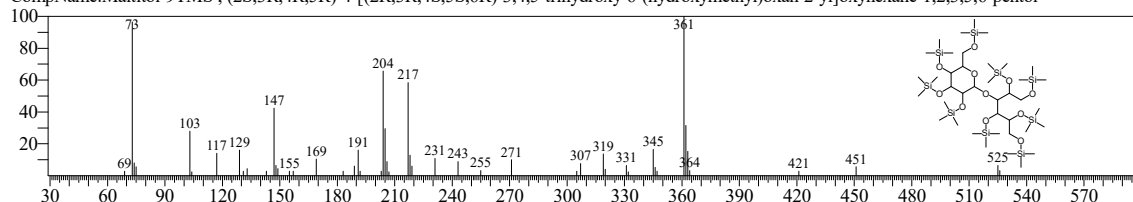

Hit#:5 Entry:541 Library:OA\_TMS\_DB5\_67min\_V3.lib

SI:24 Formula:C36H86O11Si8 CAS:57-50-1 MolWeight:918 RetIndex:2705

CompName:Sucrose-8TMS ; (2R,3R,4S,5S,6R)-2-[(2S,3S,4S,5R)-3,4-dihydroxy-2,5-bis(hydroxymethyl)oxolan-2-yl]oxy-6-(hydroxymethyl)oxane-3

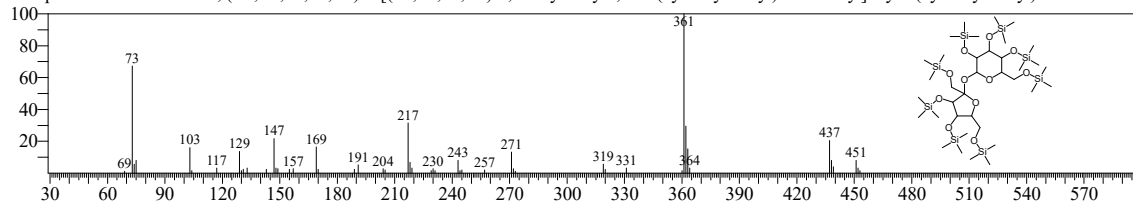



# TNAU

<< Target >>

Line#:8 R.Time:30.725(Scan#:5246) MassPeaks:277

RawMode:Averaged 30.720-30.730(5245-5247) BasePeak:281.05(834)

BG Mode:Calc. from Peak Group 1 - Event 1 Q3 Scan

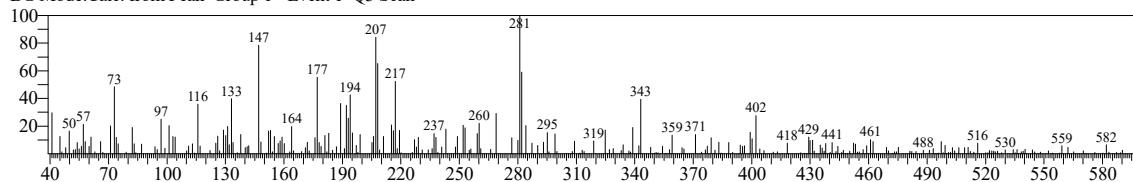

Hit#:1 Entry:535 Library:OA\_TMS\_DB5\_67min\_V3.lib

SI:35 Formula:C22H44N4O5Si4 CAS:58-63-9 MolWeight:556 RetIndex:2605

CompName:Inosine-4TMS ; 9-[(2R,3R,4S,5R)-3,4-dihydroxy-5-(hydroxymethyl)oxolan-2-yl]-3H-purin-6-one

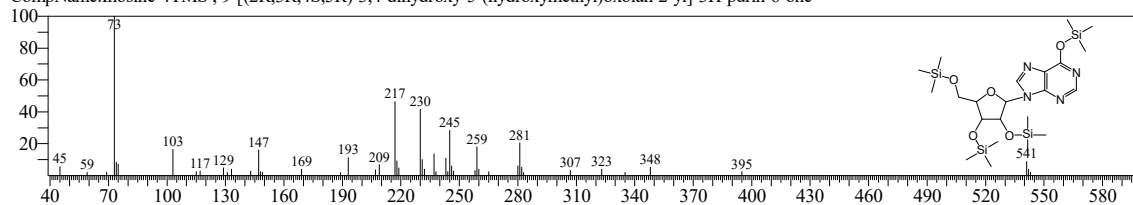

Hit#:2 Entry:236 Library:OA\_TMS\_DB5\_67min\_V3.lib

SI:34 Formula:C17H42O5Si4 CAS:50-69-1 MolWeight:438 RetIndex:1673

CompName:Ribose-4TMS(3) ; (3R,4S,5R)-5-(hydroxymethyl)oxolane-2,3,4-triol

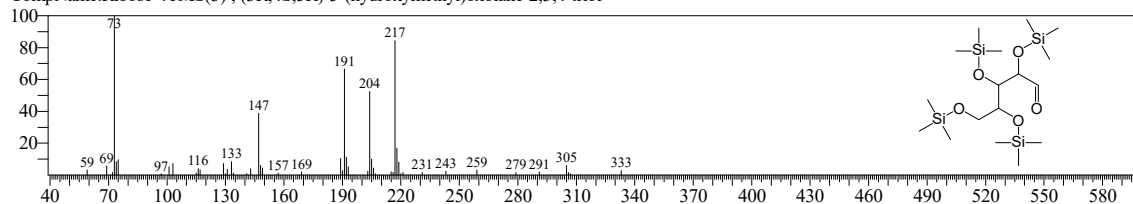

Hit#:3 Entry:210 Library:OA\_TMS\_DB5\_67min\_V3.lib

SI:33 Formula:C17H42O5Si4 CAS:10323-20-3 MolWeight:438 RetIndex:1634

CompName:Arabinose-4TMS(1) ; (2S,3R,4R)-2,3,4,5-tetrahydroxypentanal

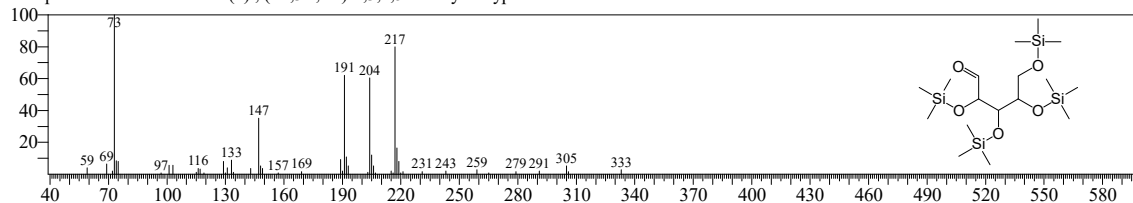

Hit#:4 Entry:351 Library:OA\_TMS\_DB5\_67min\_V3.lib

SI:33 Formula:C18H44O5Si4 CAS:154-58-5 MolWeight:452 RetIndex:1876

CompName:1,5-Anhydro-glucitol-4TMS ; (2R,3S,4R,5S)-2-(hydroxymethyl)oxane-3,4,5-triol

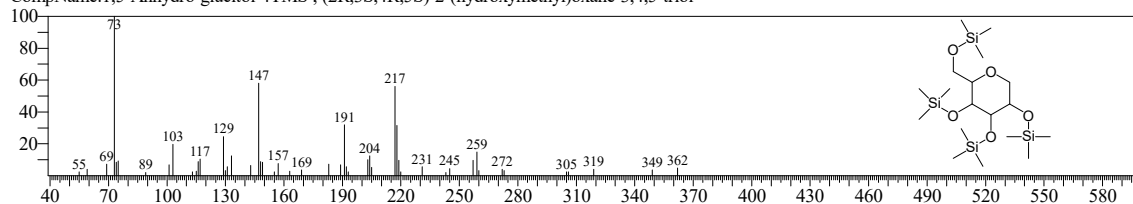

Hit#:5 Entry:155 Library:OA\_TMS\_DB5\_67min\_V3.lib

SI:33 Formula:C16H42O4Si4 CAS:149-32-6 MolWeight:410 RetIndex:1521

CompName:meso-Erythritol-4TMS ; (2S,3R)-butane-1,2,3,4-tetrol

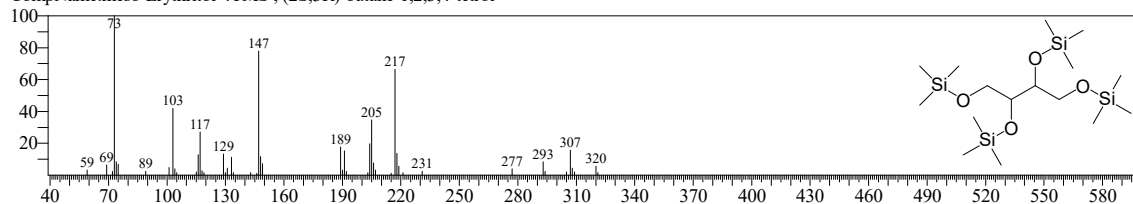

# TNAU

<< Target >>

Line#9 R.Time:30.935(Scan#:5288) MassPeaks:292

RawMode:Averaged 30.930-30.940(5287-5289) BasePeak:207.05(1274)

BG Mode:Calc. from Peak Group 1 - Event 1 Q3 Scan

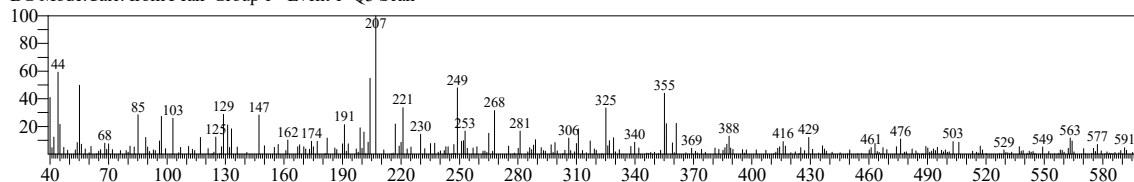

Hit#1 Entry:311 Library:OA\_TMS\_DB5\_67min\_V3.lib

SI:35 Formula:C<sub>21</sub>H<sub>52</sub>O<sub>6</sub>Si<sub>5</sub> CAS:59-23-4 MolWeight:540 RetIndex:1824

CompName:Galactose-5TMS(1) ; (3R,4S,5R,6R)-6-(hydroxymethyl)oxane-2,3,4,5-tetrol

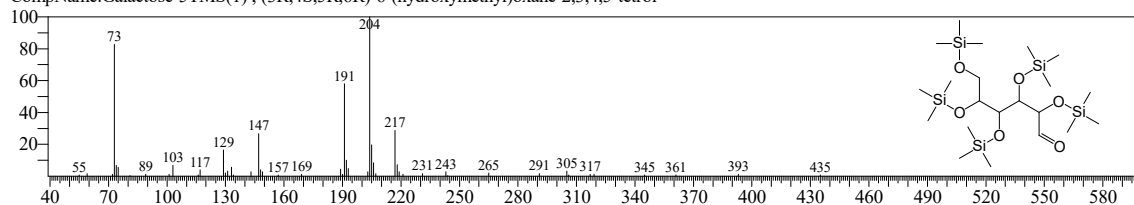

Hit#2 Entry:386 Library:OA\_TMS\_DB5\_67min\_V3.lib

SI:34 Formula:C<sub>21</sub>H<sub>52</sub>O<sub>6</sub>Si<sub>5</sub> CAS:50-99-7 MolWeight:540 RetIndex:1922

CompName:Glucose-5TMS(1) ; (3R,4S,5S,6R)-6-(hydroxymethyl)oxane-2,3,4,5-tetrol

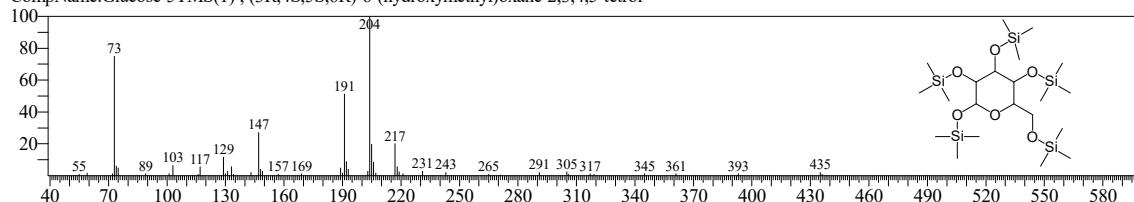

Hit#3 Entry:349 Library:OA\_TMS\_DB5\_67min\_V3.lib

SI:34 Formula:C<sub>21</sub>H<sub>52</sub>O<sub>6</sub>Si<sub>5</sub> CAS:2595-97-3 MolWeight:540 RetIndex:1874

CompName:Allose-5TMS ; (2R,3R,4R,5R)-2,3,4,5,6-pentahydroxyhexanal

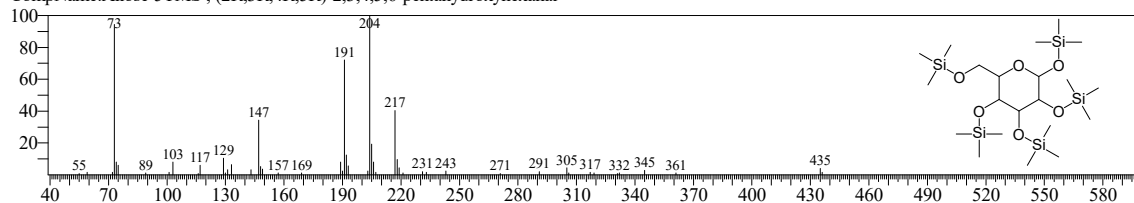

Hit#4 Entry:348 Library:OA\_TMS\_DB5\_67min\_V3.lib

SI:33 Formula:C<sub>21</sub>H<sub>52</sub>O<sub>6</sub>Si<sub>5</sub> CAS:3458-28-4 MolWeight:540 RetIndex:1872

CompName:Mannose-5TMS(2) ; (3S,4S,5S,6R)-6-(hydroxymethyl)oxane-2,3,4,5-tetrol

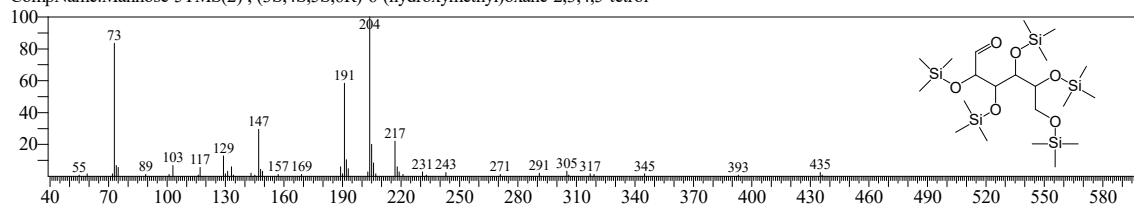

Hit#5 Entry:252 Library:OA\_TMS\_DB5\_67min\_V3.lib

SI:32 Formula:C<sub>18</sub>H<sub>44</sub>O<sub>5</sub>Si<sub>4</sub> CAS:3615-37-0 MolWeight:452 RetIndex:1695

CompName:Fucose-4TMS(1) ; (2S,3R,4S,5R,6R)-6-methyloxane-2,3,4,5-tetrol

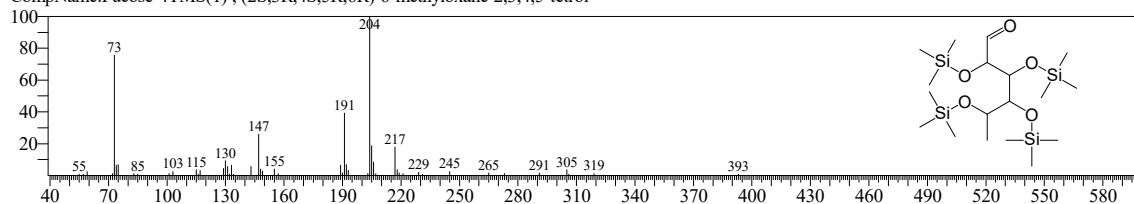

Supplement: Supplementary file 7 [file supplementary]
