# Supplementary material for: Comparative Metabolomics Profiling Reveals Key Metabolites and Associated Pathways Regulating Tuber Dormancy in White Yam (<em>Dioscorea rotundata</em>)
Source: Preprints.org preprint supplement (doi:10.20944/preprints202303.0378.v1), 2023-03-21

# TNAU

## Sample Information

Analyzed by : Admin  
 Analyzed : 04-Aug-22 9:27:31 PM  
 Sample Type : Unknown  
 Level # : 1  
 Sample Name : C87-1  
 Sample ID : C87-1  
 IS Amount : [1]=1  
 Sample Amount : 1  
 Dilution Factor : 1  
 Vial # : 8  
 Injection Volume : 1.00  
 Data File : D:\GCMS-8040NX\Aug 2022\Users\04.08.2022\Data files\04082022-008.qgd  
 Org Data File : D:\GCMS-8040NX\Aug 2022\Users\04.08.2022\Data files\04082022-008.qgd  
 Method File : D:\GCMS-8040NX\Aug 2022\Users\04.08.2022\Method file\27072022\_methodfile.qgm  
 Org Method File : D:\GCMS-8040NX\Aug 2022\Users\04.08.2022\Method file\27072022\_methodfile.qgm  
 Report File :  
 Tuning File : D:\GCMS-8040NX\Aug 2022\Tuning Data\TUNING 04082022.qgt  
 [Comment]  
 Jerry samples  
 Modified by : Admin  
 Modified : 05-Aug-22 4:24:00 PM

Chromatogram C87-1 D:\GCMS-8040NX\Aug 2022\Users\04.08.2022\Data files\04082022-008.qgd

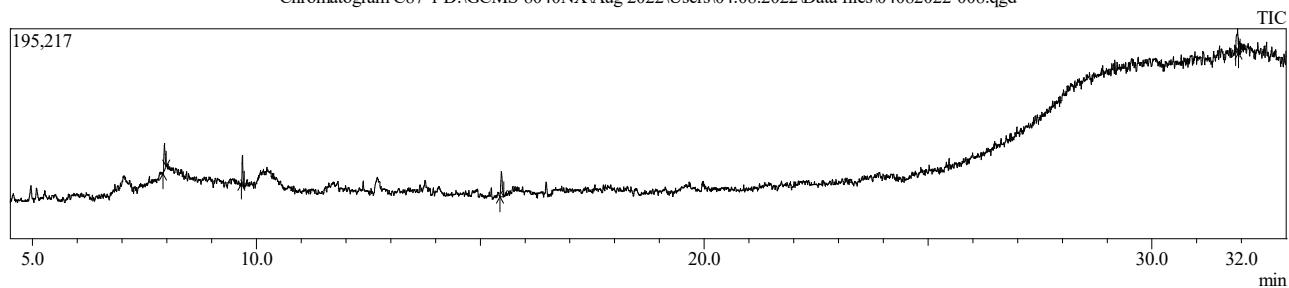

Peak Report TIC

| Peak# | R.Time | Area   | Area%  | Height | Height% | A/H  | Similarity | Name                        |
|-------|--------|--------|--------|--------|---------|------|------------|-----------------------------|
| 1     | 7.944  | 46154  | 23.13  | 25534  | 23.77   | 1.81 | 85         | Dodecane                    |
| 2     | 9.687  | 37976  | 19.03  | 27127  | 25.25   | 1.40 | 88         | Undecane                    |
| 3     | 15.471 | 50339  | 25.22  | 23467  | 21.84   | 2.15 | 84         | 2,4-Di-tert-butylphenol     |
| 4     | 31.914 | 50875  | 25.49  | 21393  | 19.91   | 2.38 | 33         | Epinephrine-3TMS            |
| 5     | 31.955 | 14234  | 7.13   | 9910   | 9.22    | 1.44 | 23         | 2-Hydroxyhippuric acid-3TMS |
|       |        | 199578 | 100.00 | 107431 | 100.00  |      |            |                             |

Library

# TNAU

<< Target >>

Line#:1 R.Time:7.945(Scan#:690) MassPeaks:277

RawMode:Averaged 7.940-7.950(689-691) BasePeak:57.10(5990)

BG Mode:Calc. from Peak Group 1 - Event 1 Q3 Scan

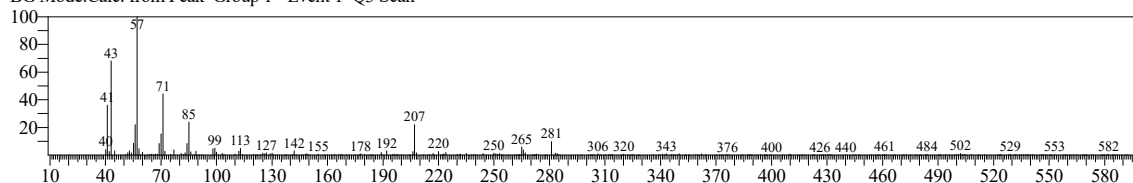

Hit#:1 Entry:30057 Library:NIST20M1.lib

SI:85 Formula:C12H26 CAS:112-40-3 MolWeight:170 RetIndex:1200

CompName:Dodecane \$\$ n-Dodecane \$\$ Adakane 12 \$\$ Ba 51-090453 \$\$ CH3(CH2)10CH3 \$\$ Bihexyl \$\$ Dihexyl \$\$ Duodecane \$\$ NSC 8714

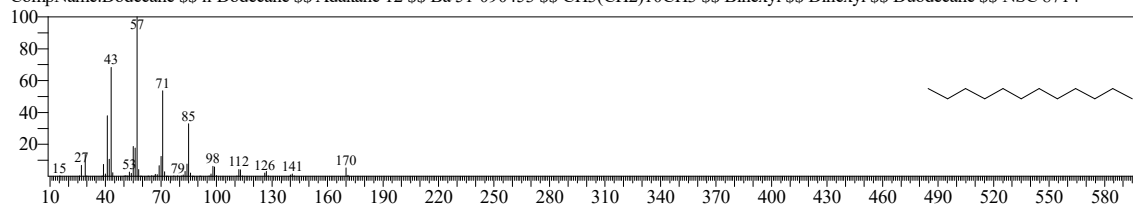

Hit#:2 Entry:25291 Library:NIST20R.lib

SI:85 Formula:C15H32 CAS:31295-56-4 MolWeight:212 RetIndex:1320

CompName:Dodecane, 2,6,11-trimethyl- \$\$ 2,6,11-Trimethyldodecane

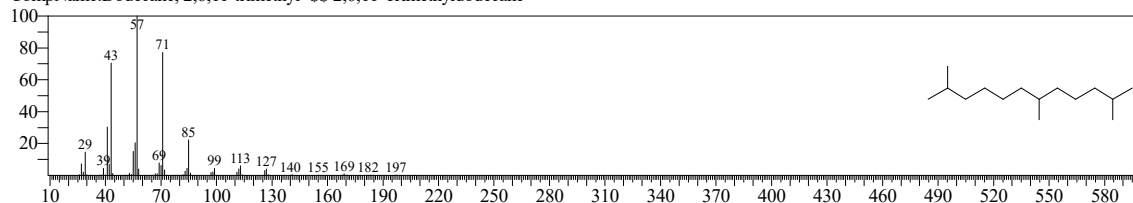

Hit#:3 Entry:12897 Library:NIST20R.lib

SI:85 Formula:C11H24 CAS:1120-21-4 MolWeight:156 RetIndex:1100

CompName:Undecane \$\$ n-Undecane \$\$ Hendecane \$\$ n-C11H24 \$\$ UN 2330

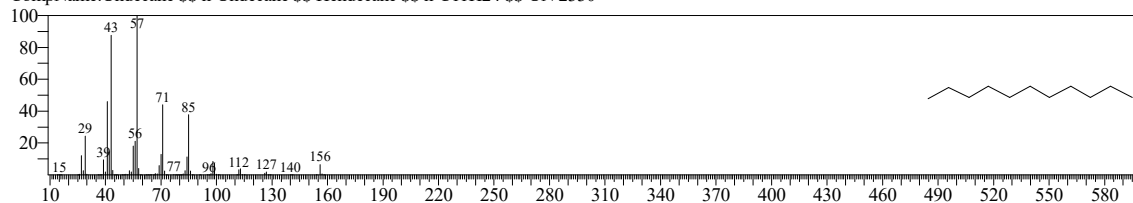

Hit#:4 Entry:13631 Library:NIST20M1.lib

SI:85 Formula:C10H22 CAS:15869-93-9 MolWeight:142 RetIndex:887

CompName:Octane, 3,5-dimethyl- \$\$ 3,5-Dimethyloctane

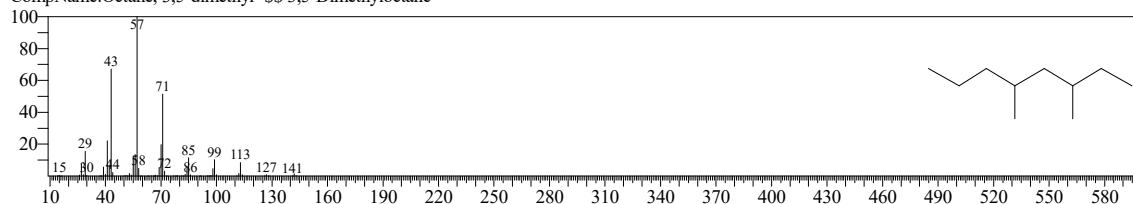

Hit#:5 Entry:13604 Library:NIST20M1.lib

SI:84 Formula:C10H22 CAS:124-18-5 MolWeight:142 RetIndex:1000

CompName:Decane \$\$ n-Decane \$\$ n-C10H22 \$\$ UN 2247

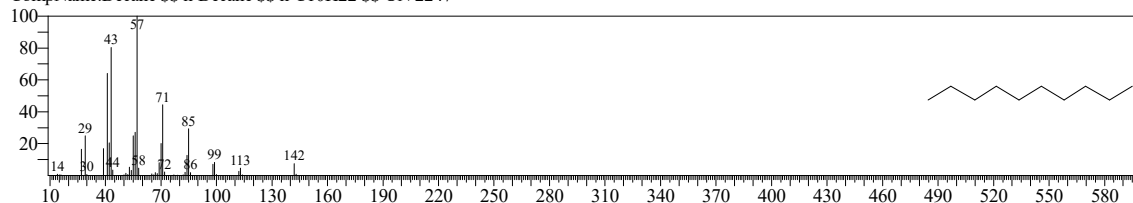

# TNAU

<< Target >>

Line# 2 R.Time: 9.685 (Scan#: 1038) MassPeaks: 315

Raw Mode: Averaged 9.680-9.690 (1037-1039) BasePeak: 57.05 (5512)

BG Mode: Calc. from Peak Group 1 - Event 1 Q3 Scan

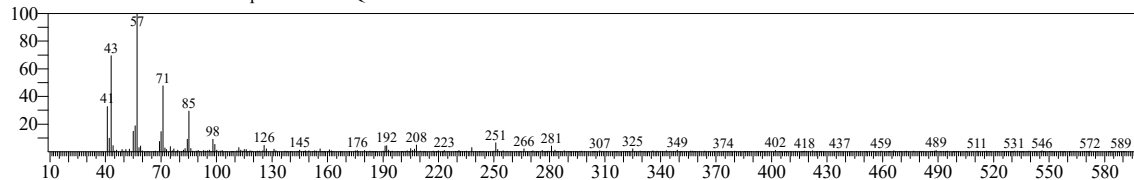

Hit#: 1 Entry: 21042 Library: NIST20M1.lib

SI: 88 Formula: C<sub>11</sub>H<sub>24</sub> CAS: 1120-21-4 MolWeight: 156 RetIndex: 1100

CompName: Undecane \$\$ n-Undecane \$\$ Hendecane \$\$ n-C<sub>11</sub>H<sub>24</sub> \$\$ UN 2330

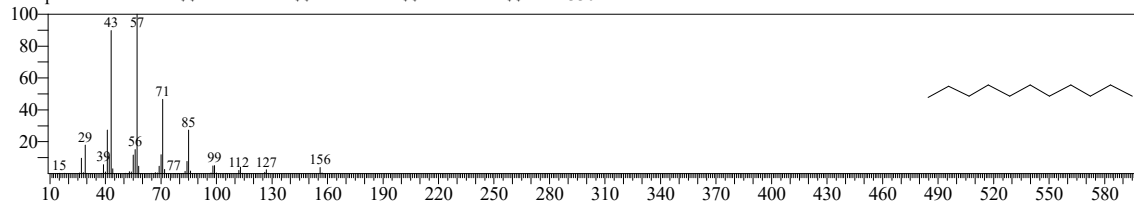

Hit#: 2 Entry: 30057 Library: NIST20M1.lib

SI: 88 Formula: C<sub>12</sub>H<sub>26</sub> CAS: 112-40-3 MolWeight: 170 RetIndex: 1200

CompName: Dodecane \$\$ n-Dodecane \$\$ Adakane 12 \$\$ Ba 51-090453 \$\$ CH<sub>3</sub>(CH<sub>2</sub>)<sub>10</sub>CH<sub>3</sub> \$\$ Bihexyl \$\$ Dihexyl \$\$ Duodecane \$\$ NSC 8714

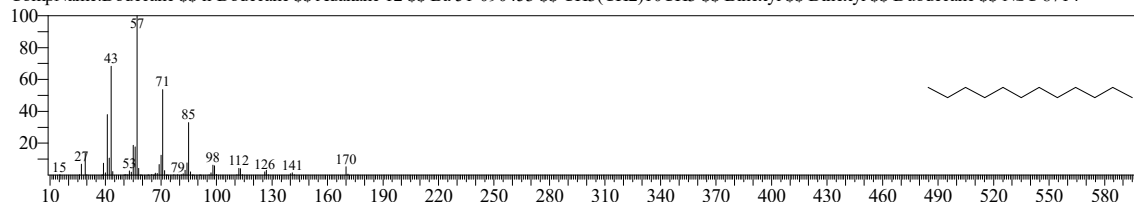

Hit#: 3 Entry: 40226 Library: NIST20M1.lib

SI: 87 Formula: C<sub>13</sub>H<sub>28</sub> CAS: 629-50-5 MolWeight: 184 RetIndex: 1300

CompName: Tridecane \$\$ n-Tridecane \$\$ Tridecane, n-

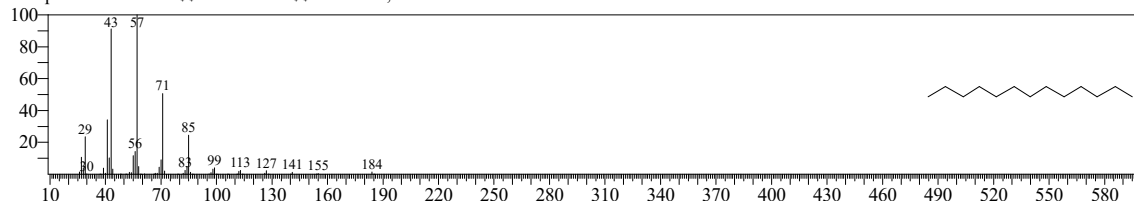

Hit#: 4 Entry: 12893 Library: NIST20R.lib

SI: 87 Formula: C<sub>11</sub>H<sub>24</sub> CAS: 13151-34-3 MolWeight: 156 RetIndex: 1051

CompName: Decane, 3-methyl- \$\$ 3-Methyldecane \$\$ 2-Ethylnonane

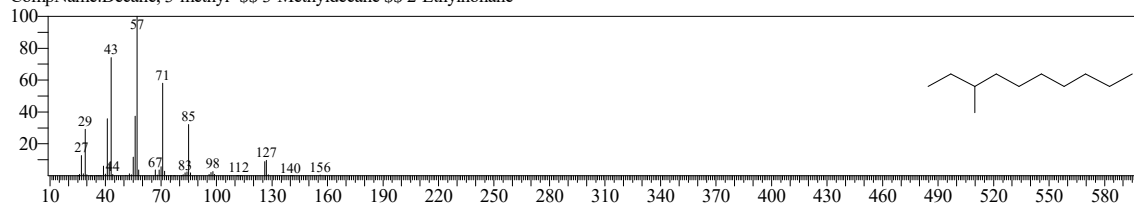

Hit#: 5 Entry: 21047 Library: NIST20M1.lib

SI: 86 Formula: C<sub>11</sub>H<sub>24</sub> CAS: 17302-32-8 MolWeight: 156 RetIndex: 986

CompName: Nonane, 3,7-dimethyl- \$\$ 3,7-Dimethylnonane

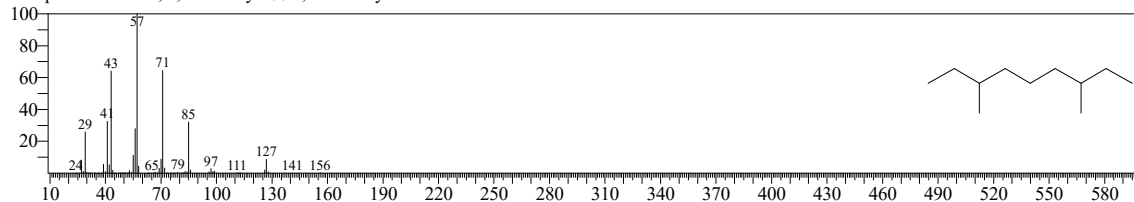

# TNAU

<< Target >>

Line#3 R.Time:15.470(Scan#:2195) MassPeaks:333

RawMode:Averaged 15.465-15.475(2194-2196) BasePeak:191.15(7298)

BG Mode:Calc. from Peak Group 1 - Event 1 Q3 Scan

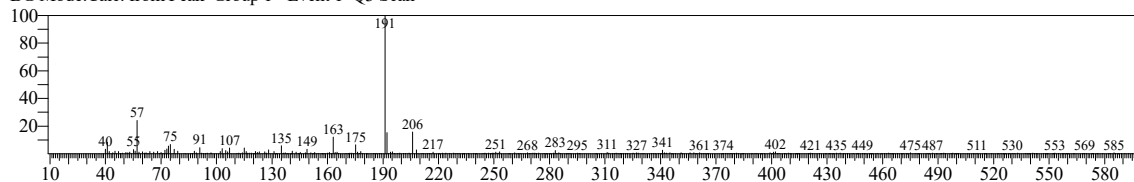

Hit#1 Entry:24086 Library:NIST20R.lib

SI:84 Formula:C14H22O CAS:96-76-4 MolWeight:206 RetIndex:1555

CompName:2,4-Di-tert-butylphenol \$\$ Phenol, 2,4-bis(1,1-dimethylethyl)- \$\$ Phenol, 2,4-di-tert-butyl- \$\$ 2,4-di-t-Butylphenol \$\$ 1-Hydroxy-2,4-di-tert-bu

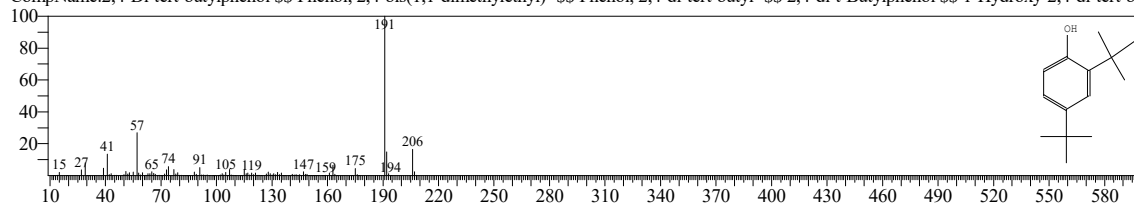

Hit#2 Entry:24098 Library:NIST20R.lib

SI:83 Formula:C14H22O CAS:5875-45-6 MolWeight:206 RetIndex:1555

CompName:Phenol, 2,5-bis(1,1-dimethylethyl)- \$\$ Phenol, 2,5-di-tert-butyl- \$\$ 2,5-Di-tert-butylphenol \$\$ 2,5-bis(1,1-Dimethylethyl)phenol

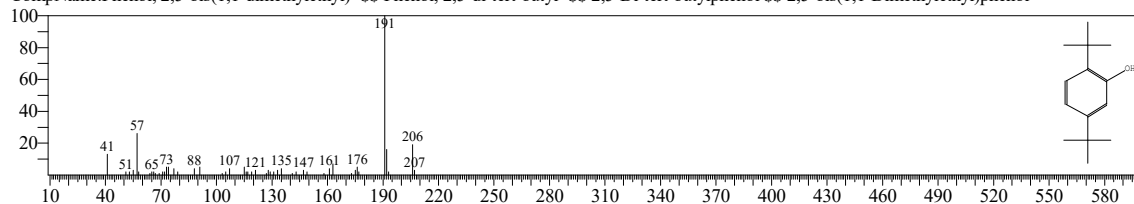

Hit#3 Entry:59031 Library:NIST20M1.lib

SI:83 Formula:C14H22O CAS:128-39-2 MolWeight:206 RetIndex:1555

CompName:Phenol, 2,6-bis(1,1-dimethylethyl)- \$\$ Phenol, 2,6-di-tert-butyl- \$\$ 2,6-Bis(tert-butyl)phenol \$\$ 2,6-Bis(1,1-dimethylethyl)phenol \$\$ 2,6-Di-ter

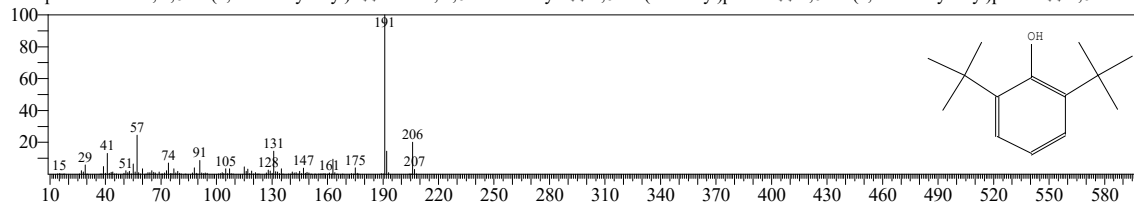

Hit#4 Entry:24110 Library:NIST20R.lib

SI:81 Formula:C14H22O CAS:1138-52-9 MolWeight:206 RetIndex:1555

CompName:Phenol, 3,5-bis(1,1-dimethylethyl)- \$\$ Phenol, 3,5-di-tert-butyl- \$\$ 3,5-Di-tert-butylphenol \$\$ Phenol, 3,5-bis(t-butyl) \$\$ 3,5-Di-t-butylphenol \$

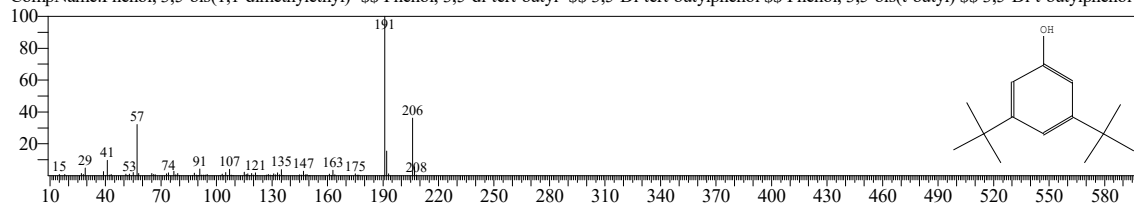

Hit#5 Entry:170993 Library:NIST20M1.lib

SI:79 Formula:C19H30O3 CAS:166273-38-7 MolWeight:306 RetIndex:2255

CompName:Pentanoic acid, 5-hydroxy-, 2,4-di-t-butylphenyl esters \$\$ 2,4-Di-tert-butylphenyl 5-hydroxypentanoate #

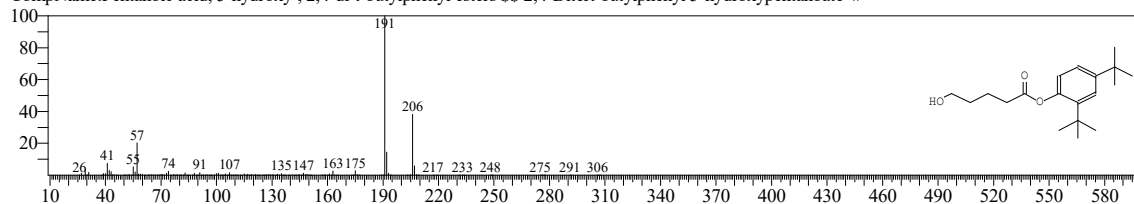

<< Target >>

Line#:4 R.Time:31.915(Scan#:5484) MassPeaks:328

RawMode:Averaged 31.910-31.920(5483-5485) BasePeak:209.00(1646)

BG Mode:Calc. from Peak Group 1 - Event 1 Q3 Scan

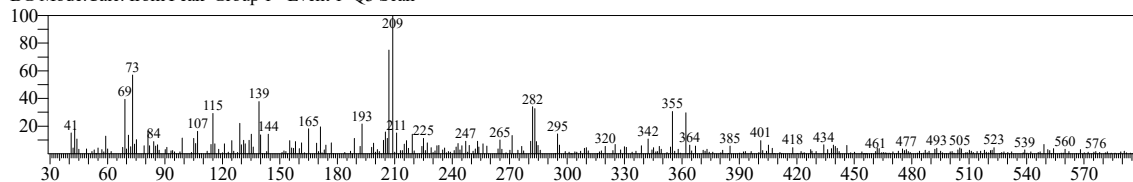

Hit#:1 Entry:343 Library:OA TMS DB5\_67min\_V3.lib

SI:33 Formula:C18H37NO3Si3 CAS:51-43-4 MolWeight:399 RetIndex:1868

CompName:Epinephrine-3TMS ; 4-[(1R)-1-hydroxy-2-(methylamino)ethyl]benzene-1,2-diol

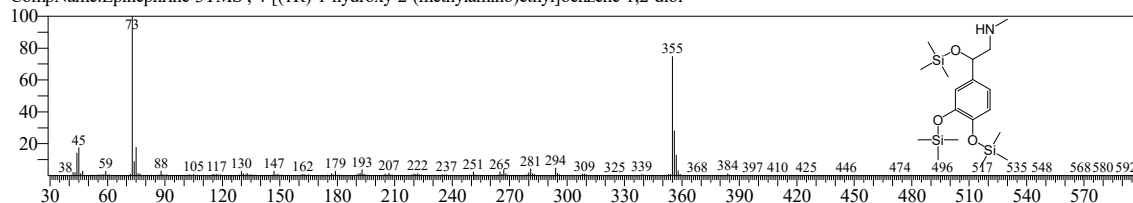

Hit#:2 Entry:539 Library:OA TMS DB5\_67min\_V3.lib

SI:32 Formula:C27H60O3Si2 CAS:544-62-7 MolWeight:488 RetIndex:2684

CompName:Batyl alcohol-2TMS ; 3-octadecoxypropane-1,2-diol

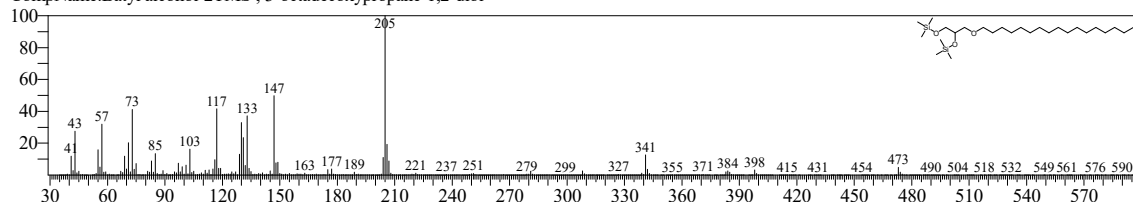

Hit#:3 Entry:290 Library:OA TMS DB5\_67min\_V3.lib

SI:32 Formula:C13H23NO3Si2 CAS:548-93-6 MolWeight:297 RetIndex:1773

CompName:3-Hydroxyanthranilic acid-2TMS ; 2-amino-3-hydroxybenzoic acid

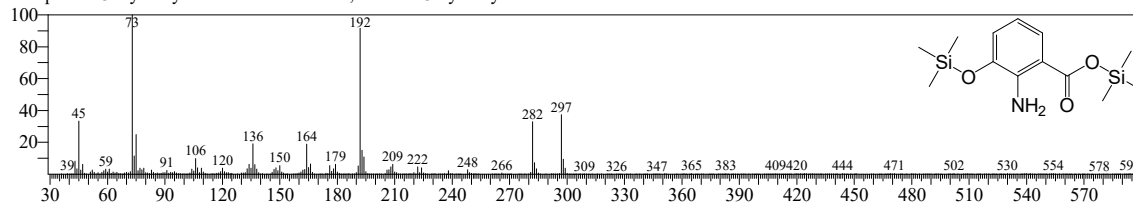

Hit#:4 Entry:535 Library:OA TMS DB5\_67min\_V3.lib

SI:32 Formula:C22H44N4O5Si4 CAS:58-63-9 MolWeight:556 RetIndex:2605

CompName:Inosine-4TMS ; 9-[(2R,3R,4S,5R)-3,4-dihydroxy-5-(hydroxymethyl)oxolan-2-yl]-3H-purin-6-one

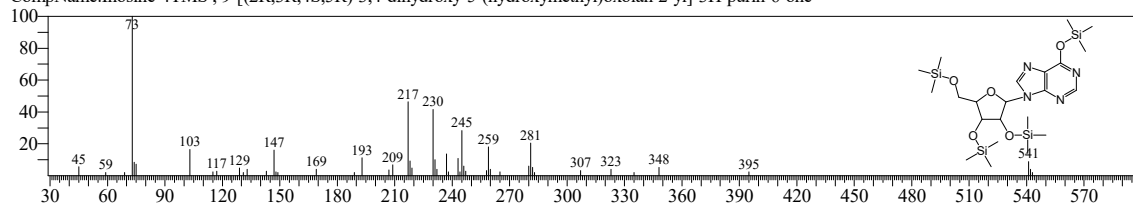

Hit#:5 Entry:238 Library:OA TMS DB5\_67min\_V3.lib

SI:32 Formula:C17H42O5Si4 CAS:1114-34-7 MolWeight:438 RetIndex:1675

CompName:Lyxose-4TMS(2) ; (2S,3S,4R)-2,3,4,5-tetrahydroxypentanal

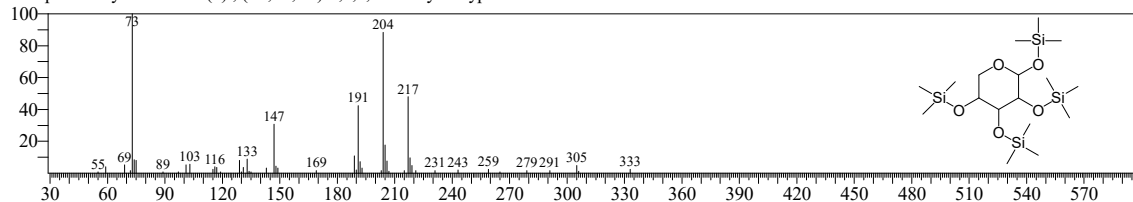

&lt;&lt; Target &gt;&gt;

Line#:5 R.Time:31.955(Scan#:5492) MassPeaks:298

RawMode:Averaged 31.950-31.960(5491-5493) BasePeak:207.05(819)

BG Mode:Calc. from Peak Group 1 - Event 1 Q3 Scan

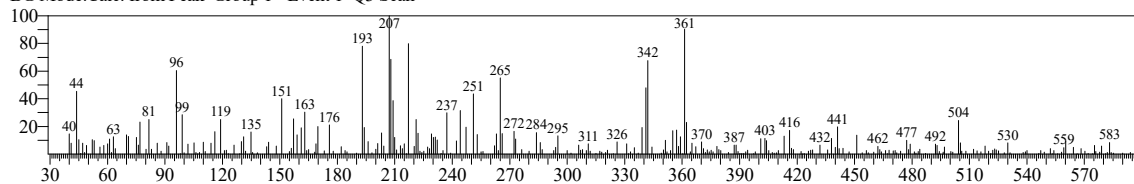

Hit#:1 Entry:420 Library:OA TMS DB5\_67min\_V3.lib

SI:23 Formula:C18H33NO4Si3 CAS:487-54-7 MolWeight:411 RetIndex:1973

CompName:2-Hydroxyhippuric acid-3TMS ; 2-[(2-hydroxybenzoyl)amino]acetic acid

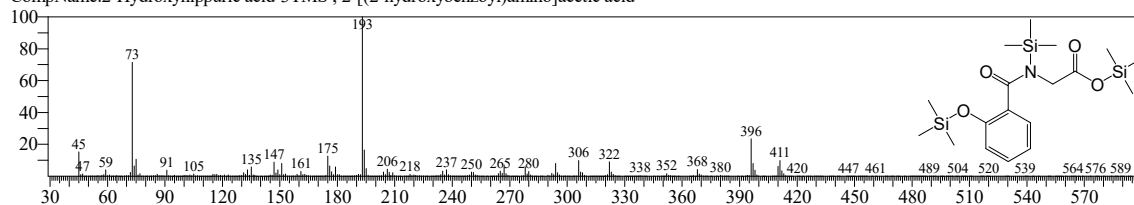

Hit#:2 Entry:552 Library:OA TMS DB5\_67min\_V3.lib

SI:23 Formula:C36H86O11Si8 CAS:99-20-7 MolWeight:918 RetIndex:2812

CompName:Trehalose-8TMS ; (2R,3S,4S,5R,6R)-2-(hydroxymethyl)-6-[(2R,3R,4S,5S,6R)-3,4,5-trihydroxy-6-(hydroxymethyl)oxan-2-yl]oxyoxane-

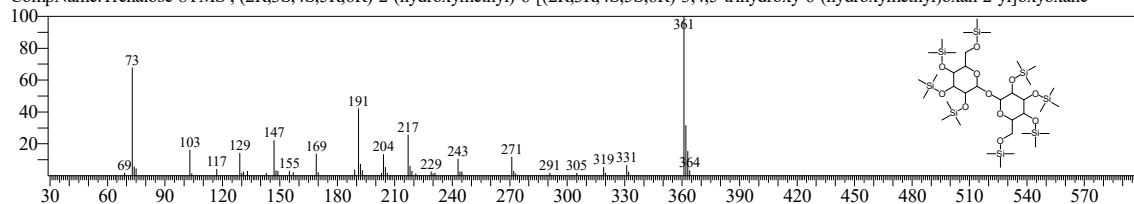

Hit#:3 Entry:541 Library:OA TMS DB5\_67min\_V3.lib

SI:21 Formula:C36H86O11Si8 CAS:57-50-1 MolWeight:918 RetIndex:2705

CompName:Sucrose-8TMS ; (2R,3R,4S,5S,6R)-2-[(2S,3S,4S,5R)-3,4-dihydroxy-2,5-bis(hydroxymethyl)oxolan-2-yl]oxy-6-(hydroxymethyl)oxane-3

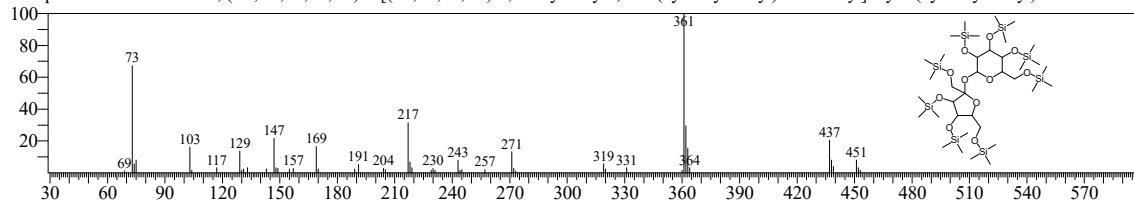

Hit#:4 Entry:559 Library:OA TMS DB5\_67min\_V3.lib

SI:20 Formula:C39H96O11Si9 CAS:585-88-6 MolWeight:992 RetIndex:2923

CompName:Maltitol-9TMS ; (2S,3R,4R,5R)-4-[(2R,3R,4S,5S,6R)-3,4,5-trihydroxy-6-(hydroxymethyl)oxan-2-yl]oxyhexane-1,2,3,5,6-pentol

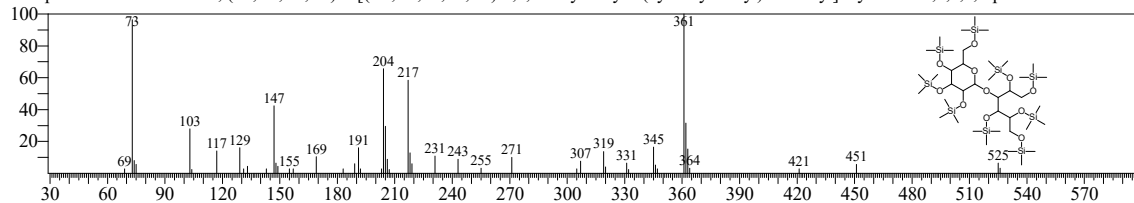

Hit#:5 Entry:315 Library:OA TMS DB5\_67min\_V3.lib

SI:20 Formula:C16H30O4Si3 CAS:99-50-3 MolWeight:370 RetIndex:1833

CompName:Protocatechuic acid-3TMS ; 3,4-dihydroxybenzoic acid

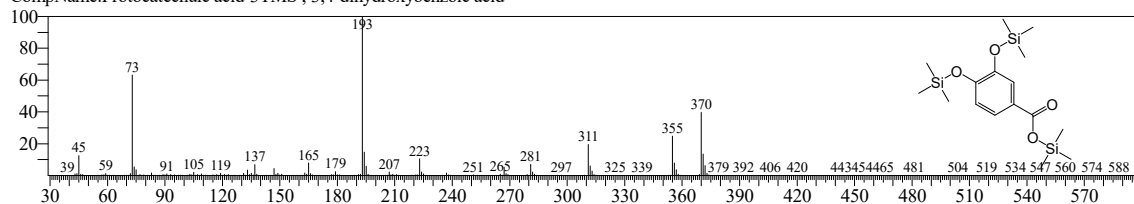

Supplement: Supplementary file 8 [file supplementary]
