# Supplementary material for: Comparative Metabolomics Profiling Reveals Key Metabolites and Associated Pathways Regulating Tuber Dormancy in White Yam (<em>Dioscorea rotundata</em>)
Source: Preprints.org preprint supplement (doi:10.20944/preprints202303.0378.v1), 2023-03-21

# TNAU

## Sample Information

Analyzed by : Admin  
 Analyzed : 05-Aug-22 9:47:33 AM  
 Sample Type : Unknown  
 Level # : 1  
 Sample Name : T56-3  
 Sample ID : T56-3  
 IS Amount : [1]=1  
 Sample Amount : 1  
 Dilution Factor : 1  
 Vial # : 26  
 Injection Volume : 1.00  
 Data File : D:\GCMS-8040NX\Aug 2022\Users\04.08.2022\Data files\04082022-027.qgd  
 Org Data File : D:\GCMS-8040NX\Aug 2022\Users\04.08.2022\Data files\04082022-027.qgd  
 Method File : D:\GCMS-8040NX\Aug 2022\Users\04.08.2022\Method file\27072022\_methodfile.qgm  
 Org Method File : D:\GCMS-8040NX\Aug 2022\Users\04.08.2022\Method file\27072022\_methodfile.qgm  
 Report File :  
 Tuning File : D:\GCMS-8040NX\Aug 2022\Tuning Data\TUNING 04082022.qgt  
 [Comment]  
 Jerry samples  
 Modified by : Admin  
 Modified : 05-Aug-22 4:44:49 PM

Chromatogram T56-3 D:\GCMS-8040NX\Aug 2022\Users\04.08.2022\Data files\04082022-027.qgd

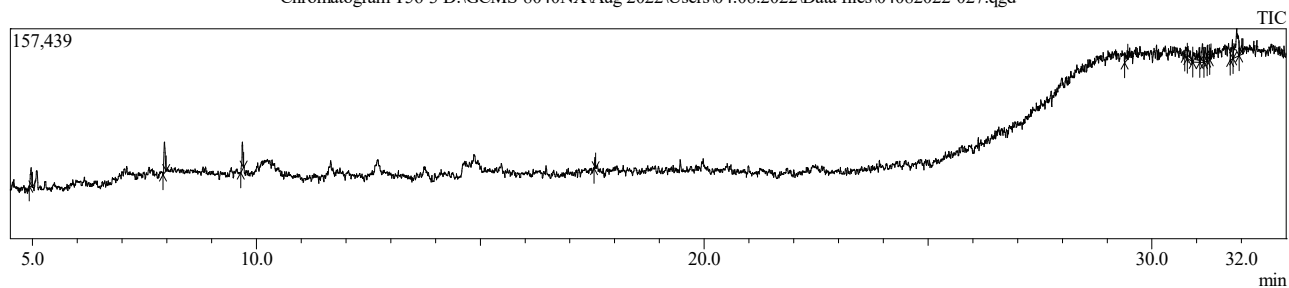

Peak Report TIC

| Peak# | R.Time | Area   | Area%  | Height | Height% | A/H  | Similarity | Name                            |
|-------|--------|--------|--------|--------|---------|------|------------|---------------------------------|
| 1     | 4.965  | 25670  | 5.60   | 14243  | 7.52    | 1.80 | 72         | 2-Propanol, 1,1'-oxybis-        |
| 2     | 7.944  | 44203  | 9.64   | 23221  | 12.27   | 1.90 | 89         | Undecane                        |
| 3     | 9.685  | 34032  | 7.42   | 20815  | 11.00   | 1.63 | 89         | Tridecane                       |
| 4     | 17.560 | 7545   | 1.65   | 7990   | 4.22    | 0.94 | 34         | Hypoxanthine-2TMS               |
| 5     | 29.449 | 16671  | 3.64   | 7035   | 3.72    | 2.37 | 33         | 3,4-Dihydroxymandelic acid-4TMS |
| 6     | 30.745 | 16494  | 3.60   | 5324   | 2.81    | 3.10 | 37         | Fendiline-TMS                   |
| 7     | 30.800 | 26834  | 5.85   | 8467   | 4.47    | 3.17 | 34         | Epinephrine-3TMS                |
| 8     | 31.055 | 50135  | 10.94  | 11024  | 5.82    | 4.55 | 35         | 4-Aminobenzoic acid-2TMS        |
| 9     | 31.130 | 32610  | 7.11   | 13857  | 7.32    | 2.35 | 39         | 4-Aminobenzoic acid-2TMS        |
| 10    | 31.180 | 25671  | 5.60   | 10623  | 5.61    | 2.42 | 36         | 3,4-Dihydroxymandelic acid-4TMS |
| 11    | 31.245 | 21843  | 4.77   | 11471  | 6.06    | 1.90 | 29         | Protocatechuic acid-3TMS        |
| 12    | 31.302 | 7951   | 1.73   | 8300   | 4.38    | 0.96 | 44         | Protocatechuic acid-3TMS        |
| 13    | 31.795 | 31192  | 6.81   | 14493  | 7.66    | 2.15 | 41         | Pyridoxine-3TMS                 |
| 14    | 31.893 | 90884  | 19.83  | 20998  | 11.09   | 4.33 | 27         | Anthranilic acid-2TMS           |
| 15    | 32.015 | 26631  | 5.81   | 11437  | 6.04    | 2.33 | 36         | 4-Hydroxyphenyllactic acid-3TMS |
|       |        | 458366 | 100.00 | 189298 | 100.00  |      |            |                                 |

Library

# TNAU

<< Target >>

Line#:1 R.Time:4.965(Scan#:94) MassPeaks:321

RawMode:Averaged 4.960-4.970(93-95) BasePeak:89.05(2918)

BG Mode:Calc. from Peak Group 1 - Event 1 Q3 Scan

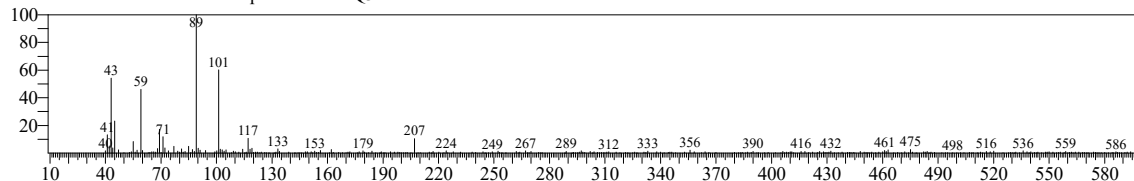

Hit#:1 Entry:7425 Library:NIST20R.lib

SI:72 Formula:C6H14O3 CAS:110-98-5 MolWeight:134 RetIndex:1018

CompName:2-Propanol, 1,1'-oxybis- \$\$ 2-Propanol, 1,1'-oxydi- \$\$ Bis(2-hydroxypropyl) ether \$\$ 1,1'-Oxydi-2-propanol \$\$ 2,2'-Dihydroxydipropyl ether \$\$

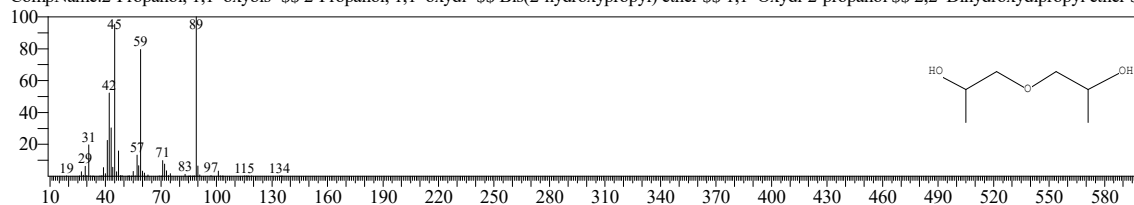

Hit#:2 Entry:2591 Library:NIST20M1.lib

SI:71 Formula:C3H12Si2 CAS:5654-05-7 MolWeight:104 RetIndex:0

CompName:Silane, methylenebis[methyl- \$\$ 2,4-Disilapentane \$\$ Silane, methylenebis\*methyl- \$\$ Methyl[(methylsilyl)methyl]silane #

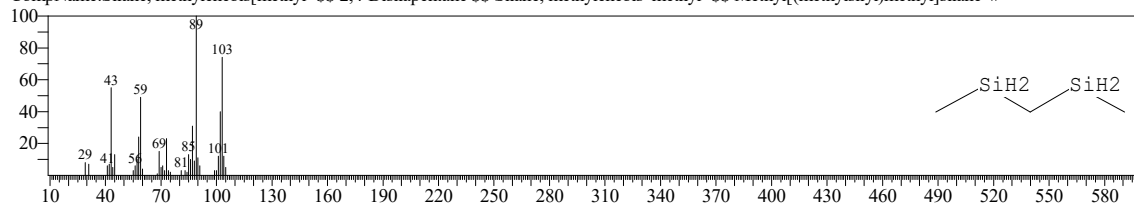

Hit#:3 Entry:9263 Library:NIST20M1.lib

SI:70 Formula:C6H12O3 CAS:21983-72-2 MolWeight:132 RetIndex:821

CompName:3,3-Dimethoxy-2-butanone

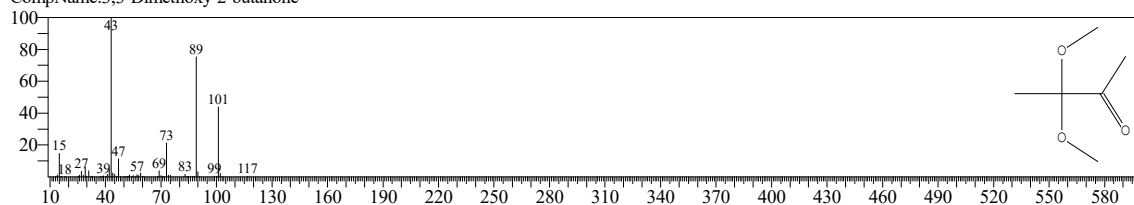

Hit#:4 Entry:22897 Library:NIST20M1.lib

SI:70 Formula:C8H16O3 CAS:0-00-0 MolWeight:160 RetIndex:931

CompName:2-Hydroxyisocaproic acid, methyl ether, methyl ester

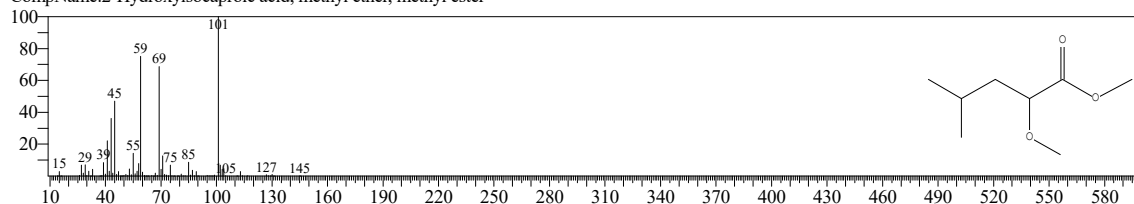

Hit#:5 Entry:16032 Library:NIST20M1.lib

SI:70 Formula:C7H16O3 CAS:6607-66-5 MolWeight:148 RetIndex:860

CompName:1,3,3-Trimethoxybutane \$\$ Butane, 1,3,3-trimethoxy-

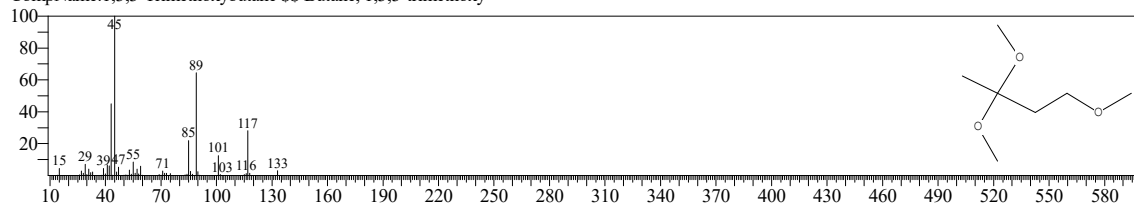

# TNAU

<< Target >>

Line#:2 R.Time:7.945(Scan#:690) MassPeaks:286

RawMode:Averaged 7.940-7.950(689-691) BasePeak:57.05(5600)

BG Mode:Calc. from Peak Group 1 - Event 1 Q3 Scan

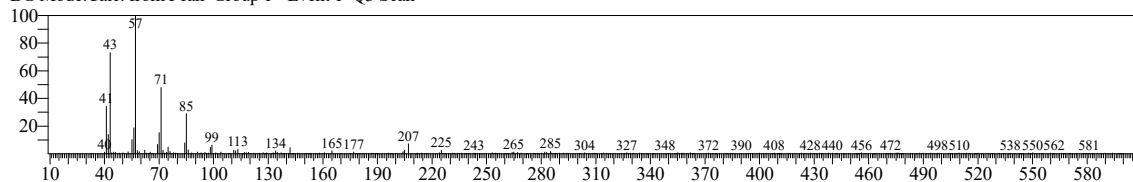

Hit#:1 Entry:21042 Library:NIST20M1.lib

SI:89 Formula:C11H24 CAS:1120-21-4 MolWeight:156 RetIndex:1100

CompName:Undecane \$\$ n-Undecane \$\$ Hendecane \$\$ n-C11H24 \$\$ UN 2330

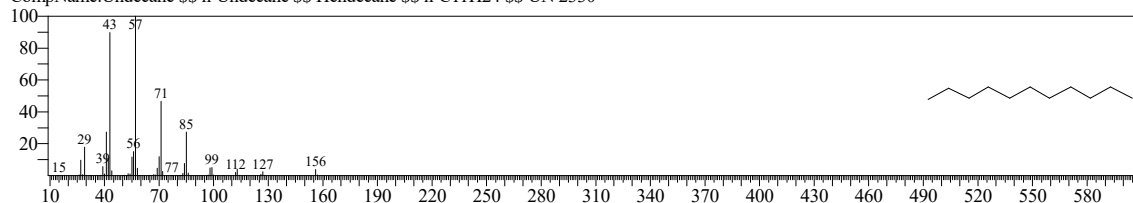

Hit#:2 Entry:30057 Library:NIST20M1.lib

SI:88 Formula:C12H26 CAS:112-40-3 MolWeight:170 RetIndex:1200

CompName:Dodecane \$\$ n-Dodecane \$\$ Adakane 12 \$\$ Ba 51-090453 \$\$ CH3(CH2)10CH3 \$\$ Bihexyl \$\$ Dihexyl \$\$ Duodecane \$\$ NSC 8714

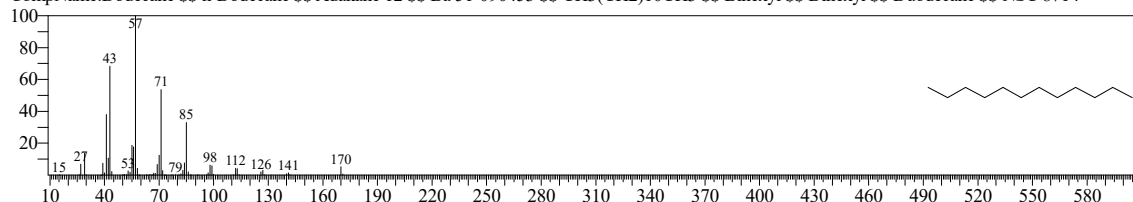

Hit#:3 Entry:40271 Library:NIST20M1.lib

SI:88 Formula:C13H28 CAS:17312-82-2 MolWeight:184 RetIndex:1185

CompName:Undecane, 4,6-dimethyl- \$\$ 4,6-Dimethylundecane #

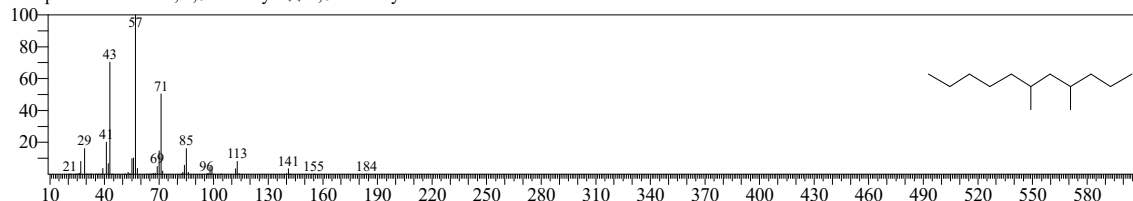

Hit#:4 Entry:40226 Library:NIST20M1.lib

SI:88 Formula:C13H28 CAS:629-50-5 MolWeight:184 RetIndex:1300

CompName:Tridecane \$\$ n-Tridecane \$\$ Tridecane, n-

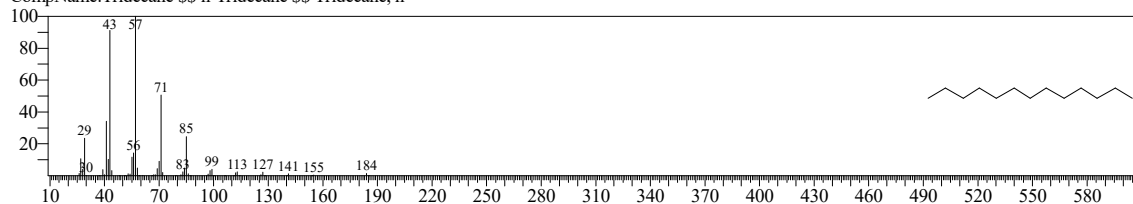

Hit#:5 Entry:27737 Library:NIST20R.lib

SI:88 Formula:C16H34 CAS:544-76-3 MolWeight:226 RetIndex:1600

CompName:Hexadecane \$\$ n-Cetane \$\$ n-Hexadecane \$\$ Cetane

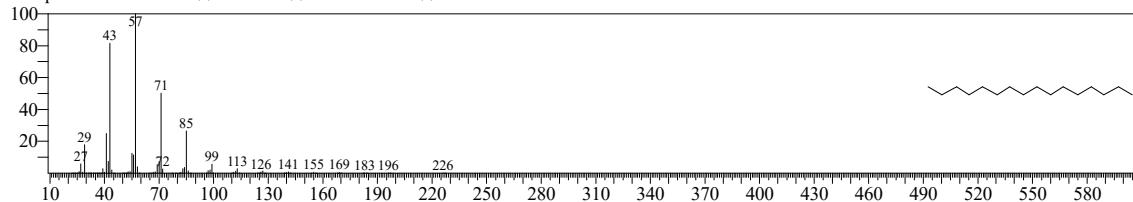

# TNAU

<< Target >>

Line#3 R.Time:9.685(Scan#:1038) MassPeaks:250

RawMode:Averaged 9.680-9.690(1037-1039) BasePeak:57.10(4746)

BG Mode:Calc. from Peak Group 1 - Event 1 Q3 Scan

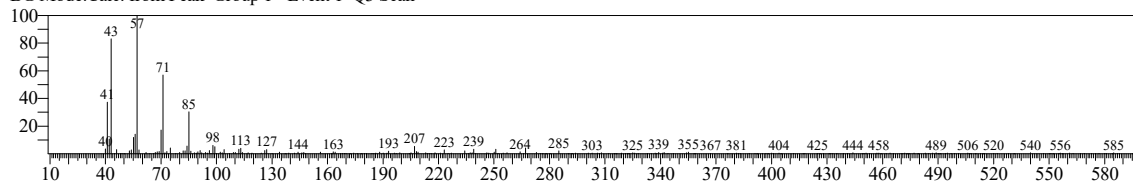

Hit#:1 Entry:40226 Library:NIST20M1.lib

SI:89 Formula:C13H28 CAS:629-50-5 MolWeight:184 RetIndex:1300

CompName:Tridecane \$\$ n-Tridecane \$\$ Tridecane, n-

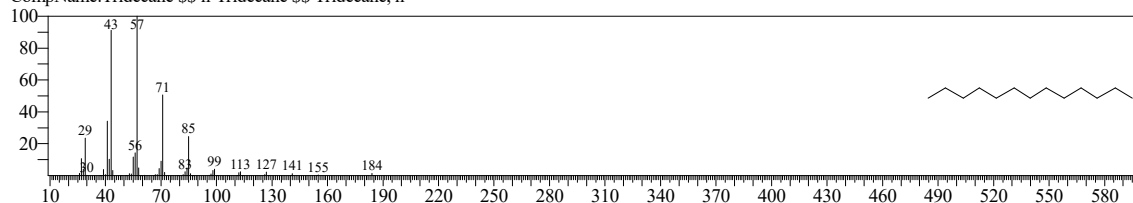

Hit#:2 Entry:21042 Library:NIST20M1.lib

SI:89 Formula:C11H24 CAS:1120-21-4 MolWeight:156 RetIndex:1100

CompName:Undecane \$\$ n-Undecane \$\$ Hendecane \$\$ n-C11H24 \$\$ UN 2330

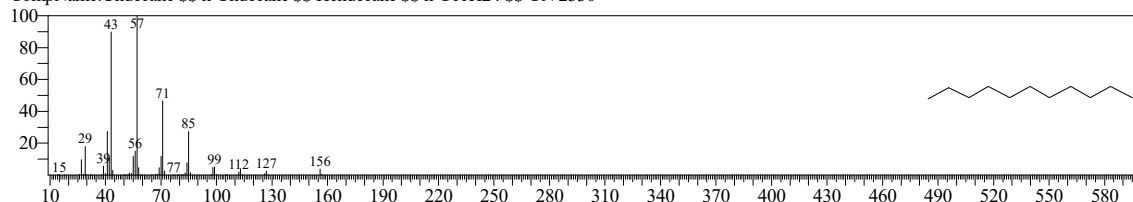

Hit#:3 Entry:30057 Library:NIST20M1.lib

SI:89 Formula:C12H26 CAS:112-40-3 MolWeight:170 RetIndex:1200

CompName:Dodecane \$\$ n-Dodecane \$\$ Adakane 12 \$\$ Ba 51-090453 \$\$ CH3(CH2)10CH3 \$\$ Bihexyl \$\$ Dihexyl \$\$ Duodecane \$\$ NSC 8714

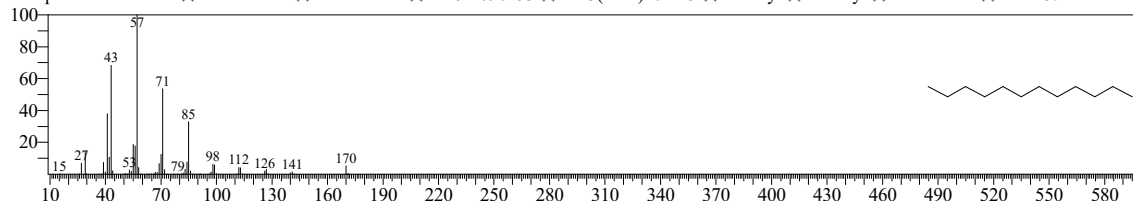

Hit#:4 Entry:22497 Library:NIST20R.lib

SI:88 Formula:C14H30 CAS:629-59-4 MolWeight:198 RetIndex:1400

CompName:Tetradecane \$\$ n-Tetradecane

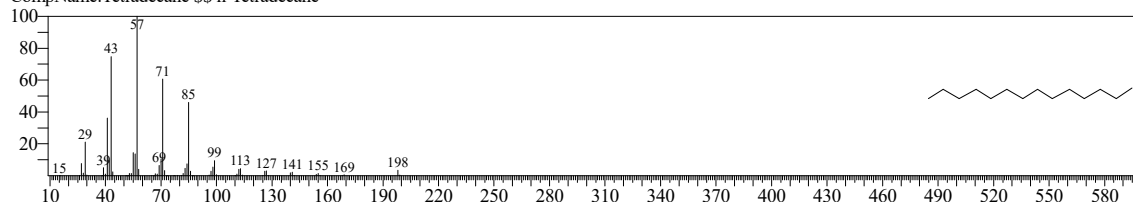

Hit#:5 Entry:27737 Library:NIST20R.lib

SI:88 Formula:C16H34 CAS:544-76-3 MolWeight:226 RetIndex:1600

CompName:Hexadecane \$\$ n-Cetane \$\$ n-Hexadecane \$\$ Cetane

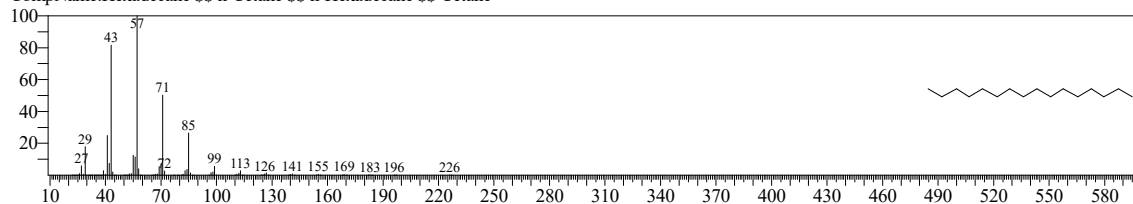

# TNAU

<< Target >>

Line#:4 R.Time:17.560(Scan#:2613) MassPeaks:330

RawMode:Averaged 17.555-17.565(2612-2614) BasePeak:207.05(591)

BG Mode:Calc. from Peak Group 1 - Event 1 Q3 Scan

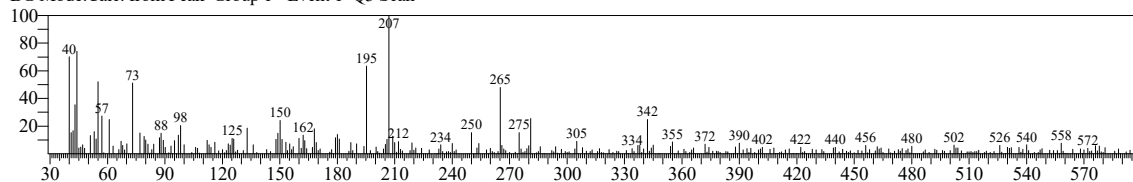

Hit#:1 Entry:310 Library:OA\_TMS\_DB5\_67min\_V3.lib

SI:34 Formula:C11H20N4OSi2 CAS:68-94-0 MolWeight:280 RetIndex:1822

CompName:Hypoxanthine-2TMS ; 3,7-dihydropurin-6-one

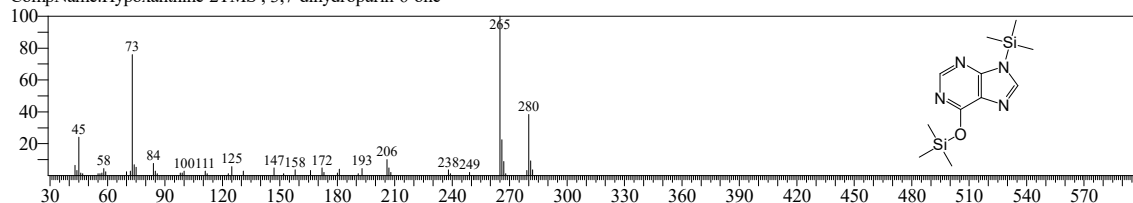

Hit#:2 Entry:138 Library:OA\_TMS\_DB5\_67min\_V3.lib

SI:32 Formula:C14H24O3Si2 CAS:90-64-2 MolWeight:296 RetIndex:1486

CompName:Mandelic acid-2TMS ; 2-hydroxy-2-phenylacetic acid

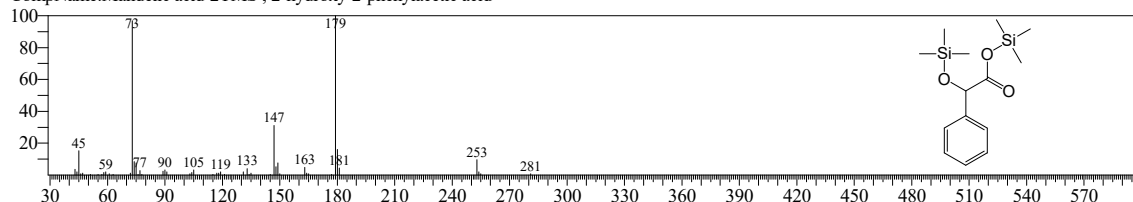

Hit#:3 Entry:382 Library:OA\_TMS\_DB5\_67min\_V3.lib

SI:31 Formula:C18H34O4Si3 CAS:6482-98-0 MolWeight:398 RetIndex:1918

CompName:4-Hydroxyphenyllactic acid-3TMS ; 2-hydroxy-3-(4-hydroxyphenyl)propanoate

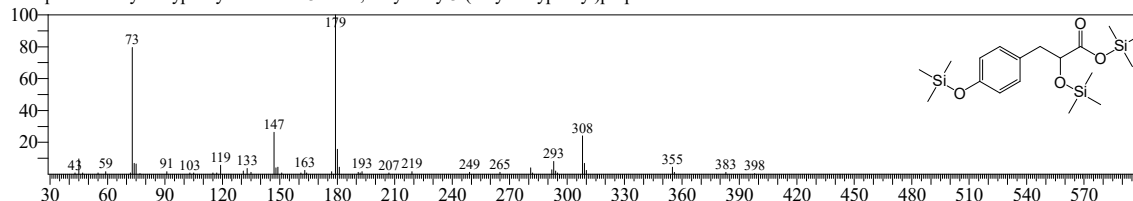

Hit#:4 Entry:23 Library:FA\_ME\_SP2560\_EI\_V3.lib

SI:30 Formula:C19H32O2 CAS:506-26-3 MolWeight:292 RetIndex:2852

CompName:Methyl gamma-linolenate ; Octadeca-6,9,12-trienoic acid

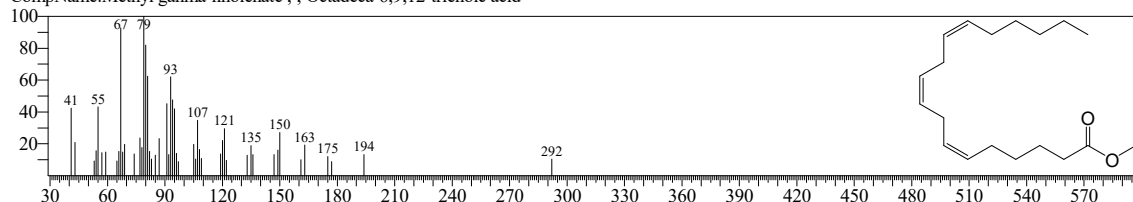

Hit#:5 Entry:29 Library:FA\_ME\_SP2560\_EI\_V3.lib

SI:30 Formula:C21H36O2 CAS:1783-84-2 MolWeight:320 RetIndex:3049

CompName:Methyl eicosa-8,11,14-trienoate ; Icosa-8,11,14-trienoic acid

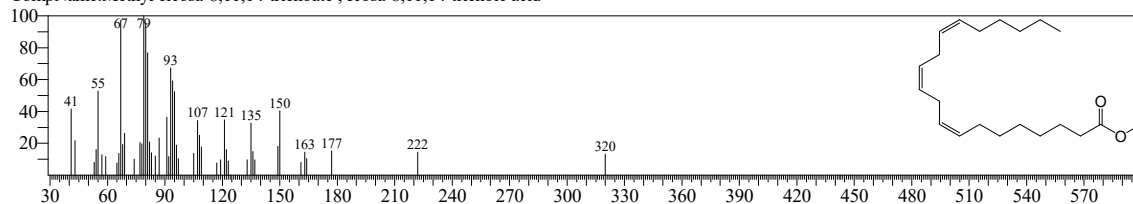

# TNAU

<< Target >>

Line#:5 R.Time:29.450(Scan#:4991) MassPeaks:303

RawMode:Averaged 29.445-29.455(4990-4992) BasePeak:207.05(2228)

BG Mode:Calc. from Peak Group 1 - Event 1 Q3 Scan

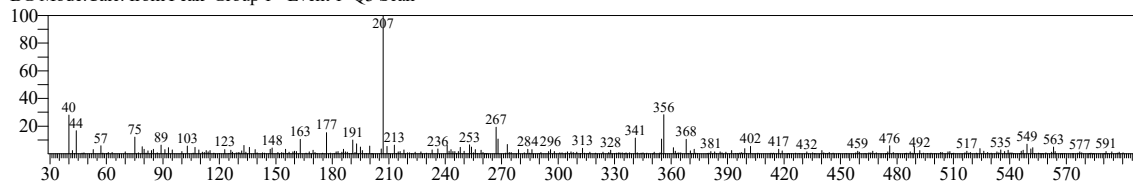

Hit#:1 Entry:402 Library:OA\_TMS\_DB5\_67min\_V3.lib

SI:33 Formula:C20H42O4Si4 CAS:775-01-9 MolWeight:458 RetIndex:1942

CompName:3,4-Dihydroxymandelic acid-4TMS ; 2-(3,4-dihydroxyphenyl)-2-hydroxyacetic acid

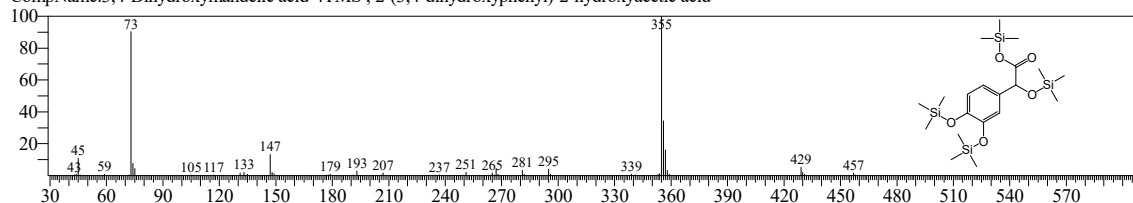

Hit#:2 Entry:315 Library:OA\_TMS\_DB5\_67min\_V3.lib

SI:30 Formula:C16H30O4Si3 CAS:99-50-3 MolWeight:370 RetIndex:1833

CompName:Protocatechuic acid-3TMS ; 3,4-dihydroxybenzoic acid

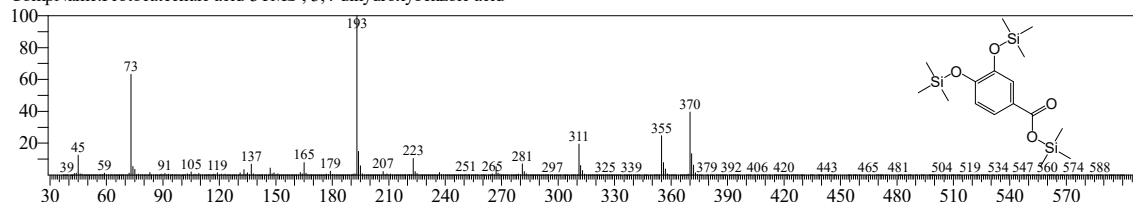

Hit#:3 Entry:179 Library:OA\_TMS\_DB5\_67min\_V3.lib

SI:28 Formula:C13H22O3Si2 CAS:99-06-9 MolWeight:282 RetIndex:1572

CompName:3-Hydroxybenzoic acid-2TMS ; 3-hydroxybenzoic acid

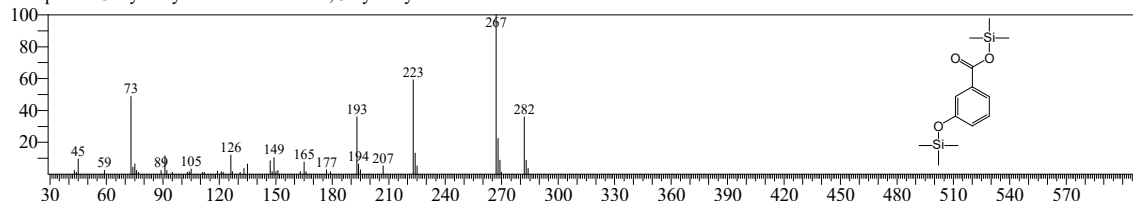

Hit#:4 Entry:211 Library:OA\_TMS\_DB5\_67min\_V3.lib

SI:27 Formula:C13H22O3Si2 CAS:99-96-7 MolWeight:282 RetIndex:1636

CompName:4-Hydroxybenzoic acid-2TMS ; 4-hydroxybenzoic acid

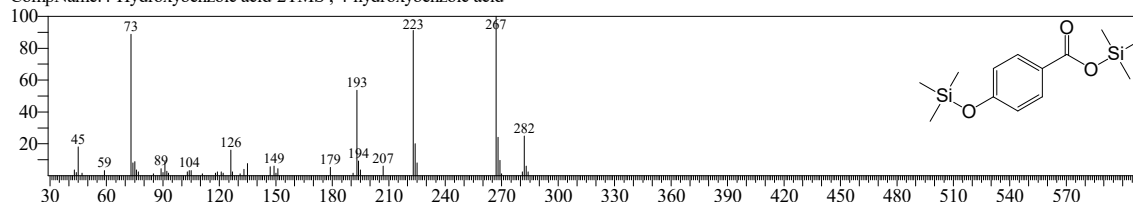

Hit#:5 Entry:150 Library:OA\_TMS\_DB5\_67min\_V3.lib

SI:24 Formula:C15H26O3Si2 CAS:515-30-0 MolWeight:310 RetIndex:1517

CompName:2-Phenyllactic acid-2TMS ; 2-hydroxy-3-phenylpropanoic acid

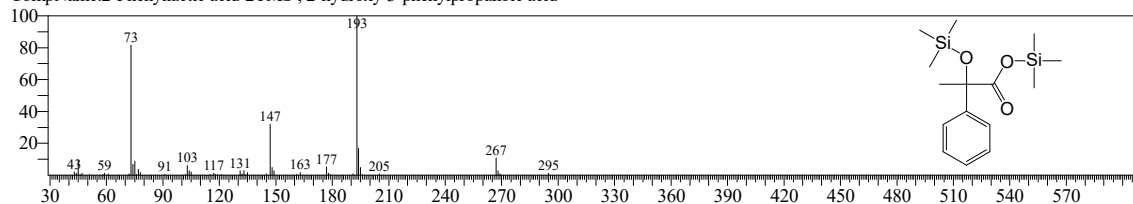

&lt;&lt; Target &gt;&gt;

Line#6 R.Time:30.745(Scan#:5250) MassPeaks:282

RawMode:Averaged 30.740-30.750(5249-5251) BasePeak:207.00(1446)

BG Mode:Calc. from Peak Group 1 - Event 1 Q3 Scan

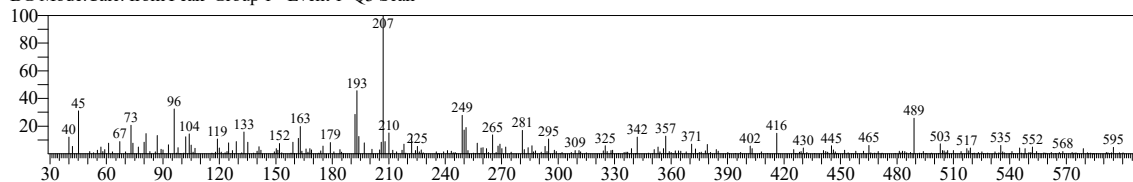

Hit#1 Entry:537 Library:OA\_TMS\_DB5\_67min\_V3.lib

SI:37 Formula:C<sub>26</sub>H<sub>33</sub>NSi CAS:13042-18-7 MolWeight:387 RetIndex:2646

CompName:Fendiline-TMS ; 3,3-diphenyl-N-(1-phenylethyl)propan-1-amine

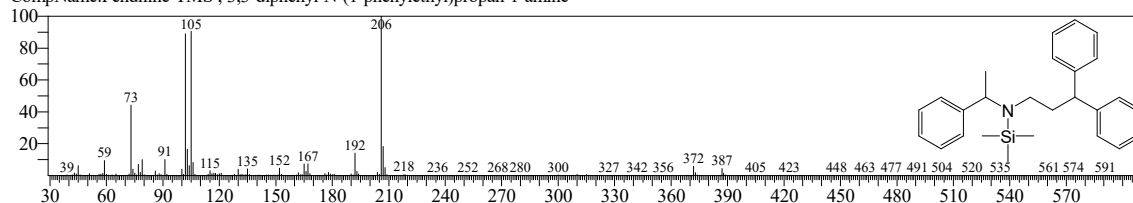

Hit#2 Entry:328 Library:OA\_TMS\_DB5\_67min\_V3.lib

SI:36 Formula:C<sub>13</sub>H<sub>23</sub>NO<sub>2</sub>Si<sub>2</sub> CAS:150-13-0 MolWeight:281 RetIndex:1845

CompName:4-Aminobenzoic acid-2TMS ; 4-aminobenzoic acid

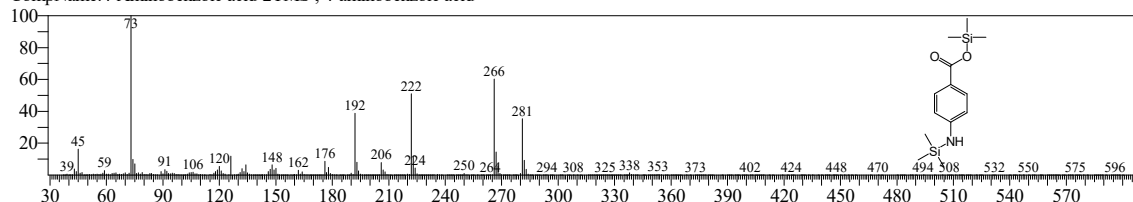

Hit#3 Entry:290 Library:OA\_TMS\_DB5\_67min\_V3.lib

SI:35 Formula:C<sub>13</sub>H<sub>23</sub>NO<sub>3</sub>Si<sub>2</sub> CAS:548-93-6 MolWeight:297 RetIndex:1773

CompName:3-Hydroxyanthranilic acid-2TMS ; 2-amino-3-hydroxybenzoic acid

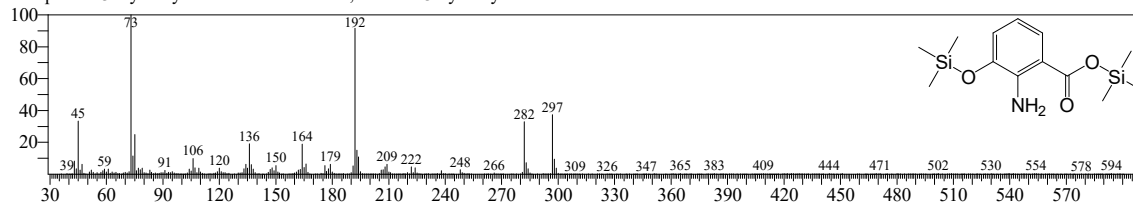

Hit#4 Entry:315 Library:OA\_TMS\_DB5\_67min\_V3.lib

SI:35 Formula:C<sub>16</sub>H<sub>30</sub>O<sub>4</sub>Si<sub>3</sub> CAS:99-50-3 MolWeight:370 RetIndex:1833

CompName:Protocatechuic acid-3TMS ; 3,4-dihydroxybenzoic acid

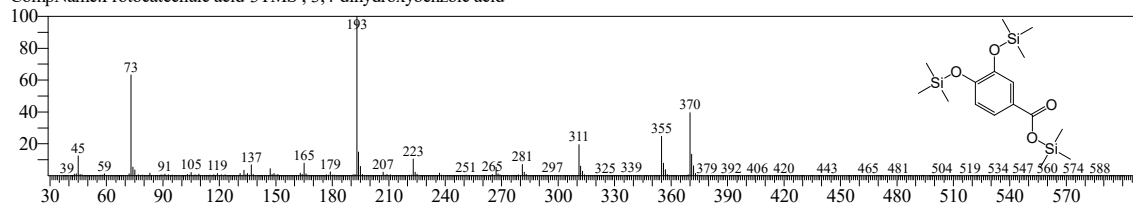

Hit#5 Entry:420 Library:OA\_TMS\_DB5\_67min\_V3.lib

SI:34 Formula:C<sub>18</sub>H<sub>33</sub>NO<sub>4</sub>Si<sub>3</sub> CAS:487-54-7 MolWeight:411 RetIndex:1973

CompName:2-Hydroxyhippuric acid-3TMS ; 2-[(2-hydroxybenzoyl)amino]acetic acid

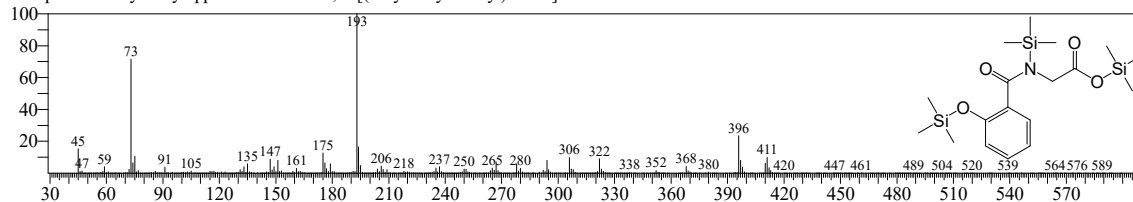

# TNAU

<< Target >>

Line#:7 R.Time:30.800(Scan#:5261) MassPeaks:309

RawMode:Averaged 30.795-30.805(5260-5262) BasePeak:207.00(1248)

BG Mode:Calc. from Peak Group 1 - Event 1 Q3 Scan

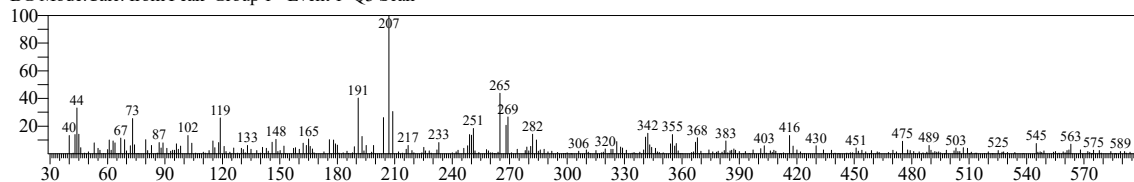

Hit#:1 Entry:343 Library:OA TMS DB5\_67min\_V3.lib

SI:34 Formula:C18H37NO3Si3 CAS:51-43-4 MolWeight:399 RetIndex:1868

CompName:Epinephrine-3TMS ; 4-[(1R)-1-hydroxy-2-(methylamino)ethyl]benzene-1,2-diol

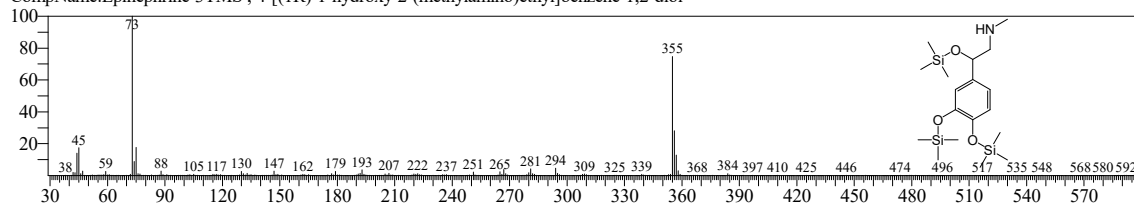

Hit#:2 Entry:402 Library:OA TMS DB5\_67min\_V3.lib

SI:34 Formula:C20H42O4Si4 CAS:775-01-9 MolWeight:458 RetIndex:1942

CompName:3,4-Dihydroxymandelic acid-4TMS ; 2-(3,4-dihydroxyphenyl)-2-hydroxyacetic acid

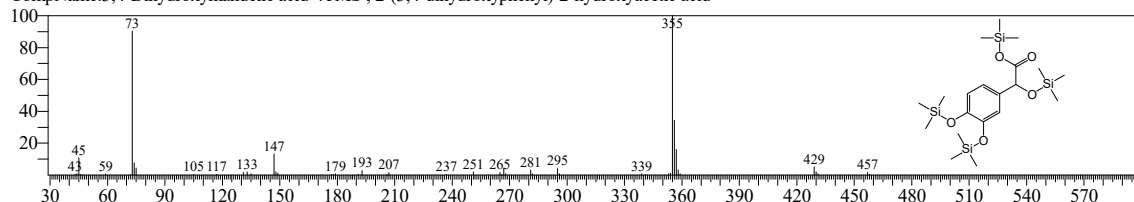

Hit#:3 Entry:294 Library:OA TMS DB5\_67min\_V3.lib

SI:33 Formula:C15H26O4Si2 CAS:306-08-1 MolWeight:326 RetIndex:1782

CompName:Homovanillic acid-2TMS ; 2-(4-hydroxy-3-methoxyphenyl)acetic acid

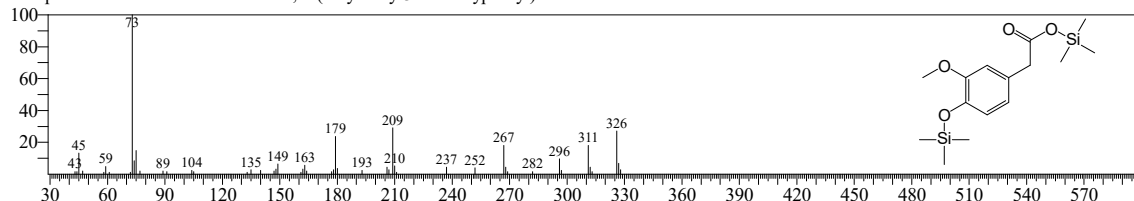

Hit#:4 Entry:310 Library:OA TMS DB5\_67min\_V3.lib

SI:32 Formula:C11H20N4OSi2 CAS:68-94-0 MolWeight:280 RetIndex:1822

CompName:Hypoxanthine-2TMS ; 3,7-dihydropurin-6-one

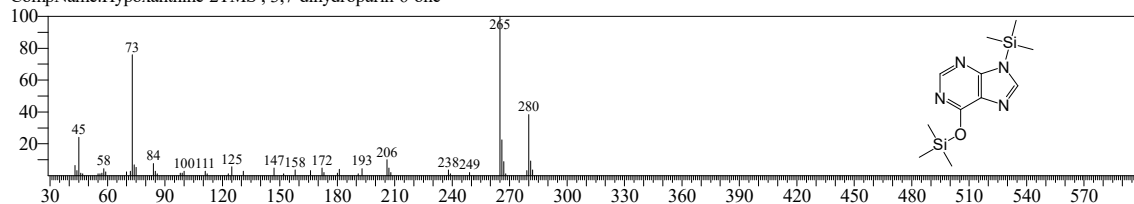

Hit#:5 Entry:238 Library:OA TMS DB5\_67min\_V3.lib

SI:31 Formula:C17H42O5Si4 CAS:1114-34-7 MolWeight:438 RetIndex:1675

CompName:Lyxose-4TMS(2) ; (2S,3S,4R)-2,3,4,5-tetrahydroxypentanal

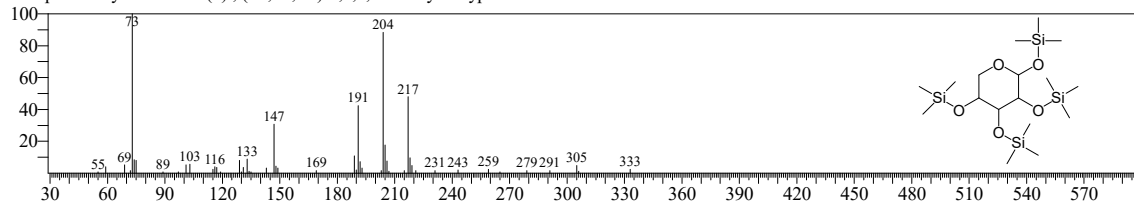



<< Target >>

Line#:8 R.Time:31.055(Scan#:5312) MassPeaks:315

RawMode:Averaged 31.050-31.060(5311-5313) BasePeak:207.05(1942)

BG Mode:Calc. from Peak Group 1 - Event 1 Q3 Scan

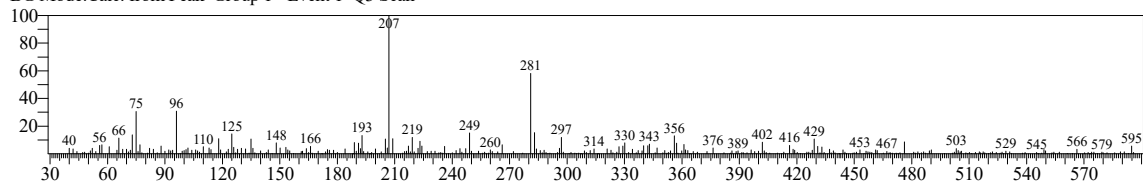

Hit#:1 Entry:328 Library:OA\_TMS\_DB5\_67min\_V3.lib

SI:35 Formula:C13H23NO2Si2 CAS:150-13-0 MolWeight:281 RetIndex:1845

CompName:4-Aminobenzoic acid-2TMS ; 4-aminobenzoic acid

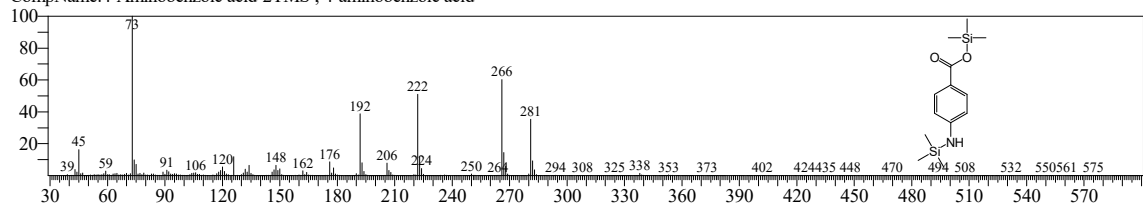

Hit#:2 Entry:343 Library:OA\_TMS\_DB5\_67min\_V3.lib

SI:32 Formula:C18H37NO3Si3 CAS:51-43-4 MolWeight:399 RetIndex:1868

CompName:Epinephrine-3TMS ; 4-[(1R)-1-hydroxy-2-(methylamino)ethyl]benzene-1,2-diol

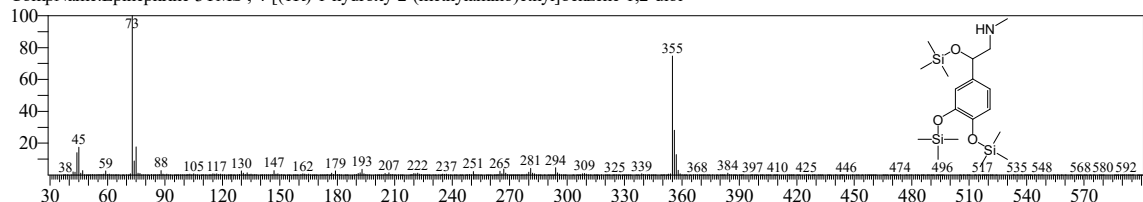

Hit#:3 Entry:359 Library:OA\_TMS\_DB5\_67min\_V3.lib

SI:31 Formula:C18H34O5Si3 CAS:55-10-7 MolWeight:414 RetIndex:1894

CompName:Vanilmandelic acid-3TMS ; 2-hydroxy-2-(4-hydroxy-3-methoxyphenyl)acetic acid

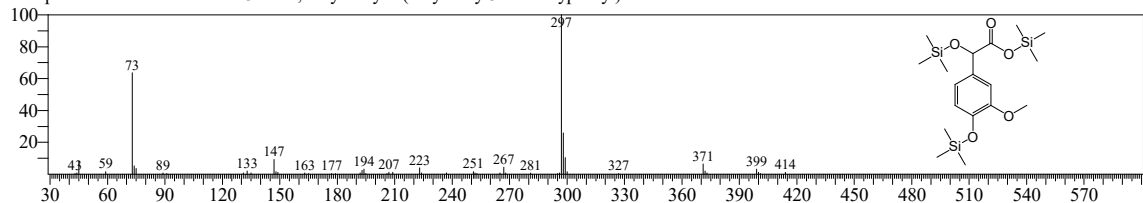

Hit#:4 Entry:315 Library:OA\_TMS\_DB5\_67min\_V3.lib

SI:31 Formula:C16H30O4Si3 CAS:99-50-3 MolWeight:370 RetIndex:1833

CompName:Protocatechuic acid-3TMS ; 3,4-dihydroxybenzoic acid

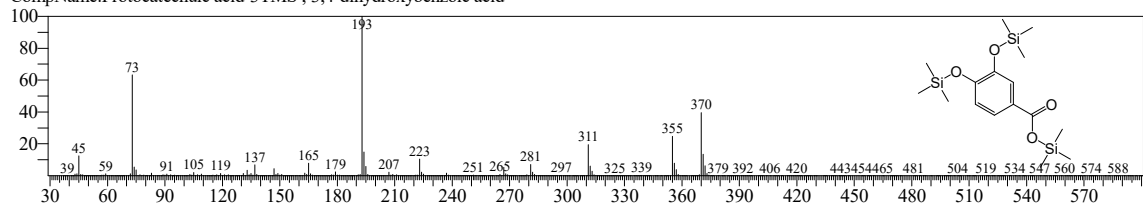

Hit#:5 Entry:290 Library:OA\_TMS\_DB5\_67min\_V3.lib

SI:31 Formula:C13H23NO3Si2 CAS:548-93-6 MolWeight:297 RetIndex:1773

CompName:3-Hydroxyanthranilic acid-2TMS ; 2-amino-3-hydroxybenzoic acid

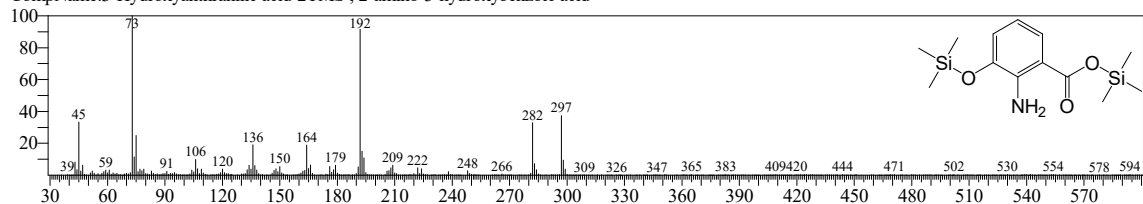

# TNAU

<< Target >>

Line#9 R.Time:31.130(Scan#:5327) MassPeaks:331

RawMode:Averaged 31.125-31.135(5326-5328) BasePeak:281.05(1431)

BG Mode:Calc. from Peak Group 1 - Event 1 Q3 Scan

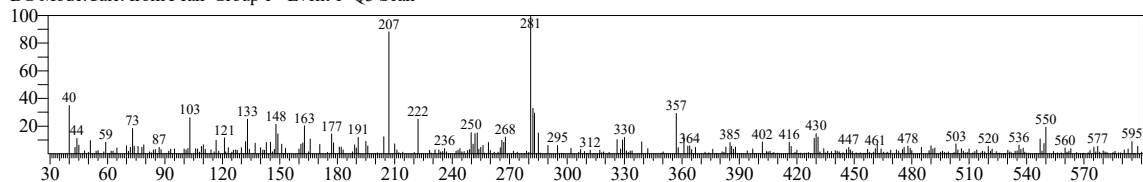

Hit#:1 Entry:328 Library:OA\_TMS\_DB5\_67min\_V3.lib

SI:39 Formula:C<sub>13</sub>H<sub>23</sub>NO<sub>2</sub>Si<sub>2</sub> CAS:150-13-0 MolWeight:281 RetIndex:1845

CompName:4-Aminobenzoic acid-2TMS ; 4-aminobenzoic acid



Hit#:2 Entry:384 Library:OA\_TMS\_DB5\_67min\_V3.lib

SI:32 Formula:C<sub>17</sub>H<sub>35</sub>NO<sub>3</sub>Si<sub>3</sub> CAS:65-23-6 MolWeight:385 RetIndex:1919

CompName:Pyridoxine-3TMS ; 4,5-bis(hydroxymethyl)-2-methylpyridin-3-ol

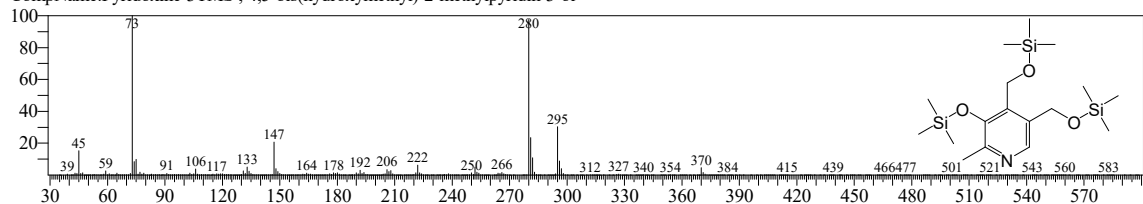

Hit#:3 Entry:179 Library:OA\_TMS\_DB5\_67min\_V3.lib

SI:31 Formula:C<sub>13</sub>H<sub>22</sub>O<sub>3</sub>Si<sub>2</sub> CAS:99-06-9 MolWeight:282 RetIndex:1572

CompName:3-Hydroxybenzoic acid-2TMS ; 3-hydroxybenzoic acid

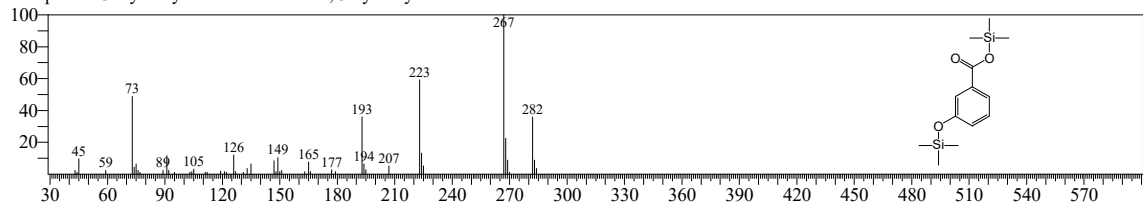

Hit#:4 Entry:203 Library:OA\_TMS\_DB5\_67min\_V3.lib

SI:31 Formula:C<sub>13</sub>H<sub>23</sub>NO<sub>2</sub>Si<sub>2</sub> CAS:118-92-3 MolWeight:281 RetIndex:1623

CompName:Anthranilic acid-2TMS ; 2-aminobenzoic acid

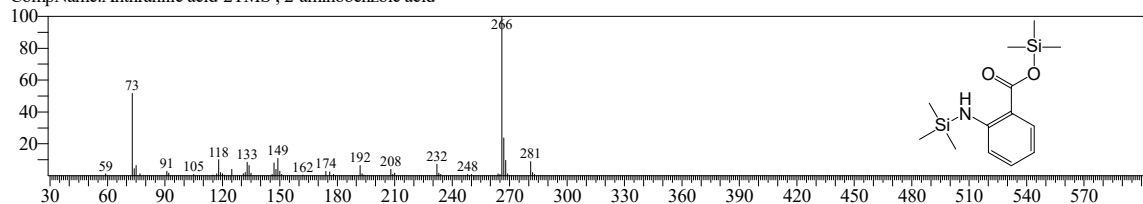

Hit#:5 Entry:211 Library:OA\_TMS\_DB5\_67min\_V3.lib

SI:30 Formula:C<sub>13</sub>H<sub>22</sub>O<sub>3</sub>Si<sub>2</sub> CAS:99-96-7 MolWeight:282 RetIndex:1636

CompName:4-Hydroxybenzoic acid-2TMS ; 4-hydroxybenzoic acid

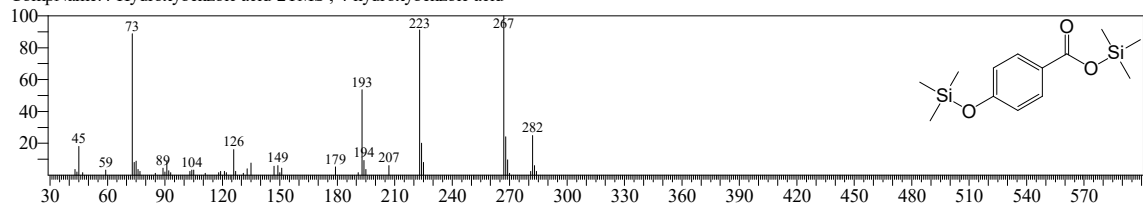

# TNAU

<< Target >>

Line#:10 R.Time:31.180(Scan#:5337) MassPeaks:307

RawMode:Averaged 31.175-31.185(5336-5338) BasePeak:207.05(1390)

BG Mode:Calc. from Peak Group 1 - Event 1 Q3 Scan

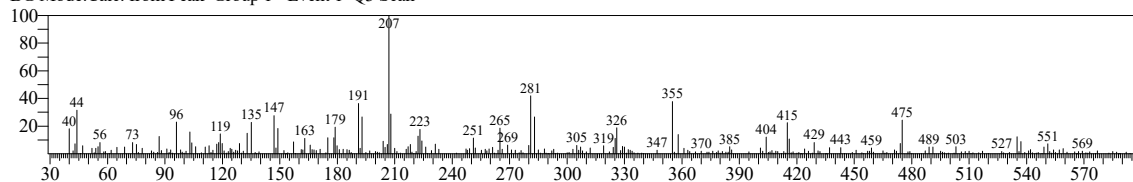

Hit#:1 Entry:402 Library:OA\_TMS\_DB5\_67min\_V3.lib

SI:36 Formula:C20H42O4Si4 CAS:775-01-9 MolWeight:458 RetIndex:1942

CompName:3,4-Dihydroxymandelic acid-4TMS ; 2-(3,4-dihydroxyphenyl)-2-hydroxyacetic acid

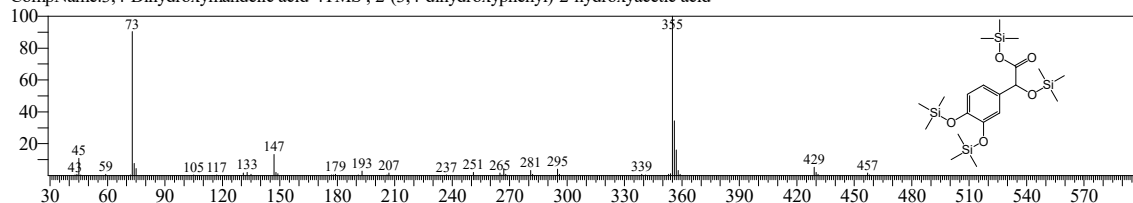

Hit#:2 Entry:77 Library:OA\_TMS\_DB5\_67min\_V3.lib

SI:36 Formula:C12H32O3Si3 CAS:56-81-5 MolWeight:308 RetIndex:1279

CompName:Glycerol-3TMS ; propane-1,2,3-triol

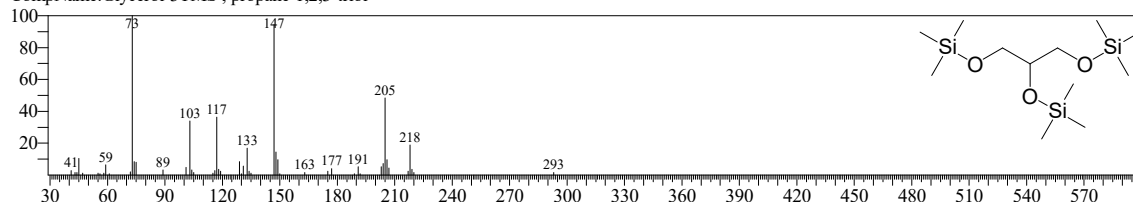

Hit#:3 Entry:382 Library:OA\_TMS\_DB5\_67min\_V3.lib

SI:34 Formula:C18H34O4Si3 CAS:6482-98-0 MolWeight:398 RetIndex:1918

CompName:4-Hydroxyphenyllactic acid-3TMS ; 2-hydroxy-3-(4-hydroxyphenyl)propanoate



Hit#:4 Entry:343 Library:OA\_TMS\_DB5\_67min\_V3.lib

SI:34 Formula:C18H37NO3Si3 CAS:51-43-4 MolWeight:399 RetIndex:1868

CompName:Epinephrine-3TMS ; 4-[(1R)-1-hydroxy-2-(methylamino)ethyl]benzene-1,2-diol

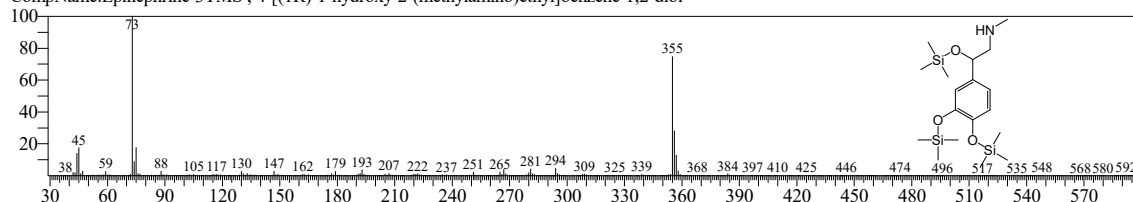

Hit#:5 Entry:328 Library:OA\_TMS\_DB5\_67min\_V3.lib

SI:34 Formula:C13H23NO2Si2 CAS:150-13-0 MolWeight:281 RetIndex:1845

CompName:4-Aminobenzoic acid-2TMS ; 4-aminobenzoic acid

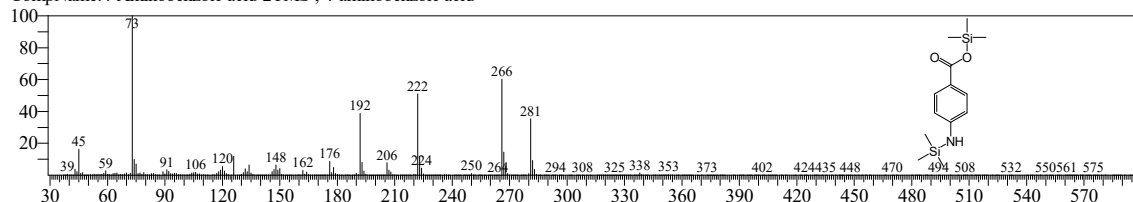

# TNAU

<< Target >>

Line#:11 R.Time:31.245(Scan#:5350) MassPeaks:305

RawMode:Averaged 31.240-31.250(5349-5351) BasePeak:209.05(526)

BG Mode:Calc. from Peak Group 1 - Event 1 Q3 Scan

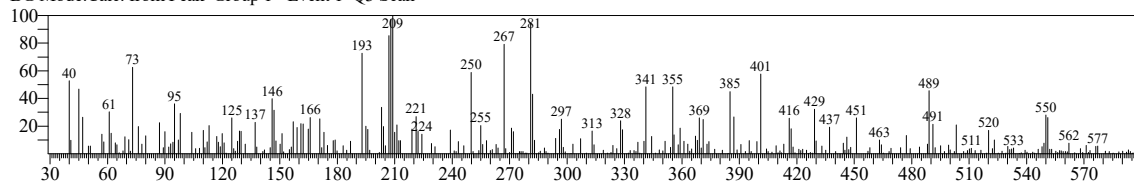

Hit#:1 Entry:315 Library:OA\_TMS\_DB5\_67min\_V3.lib

SI:29 Formula:C16H30O4Si3 CAS:99-50-3 MolWeight:370 RetIndex:1833

CompName:Protocatechuic acid-3TMS ; 3,4-dihydroxybenzoic acid

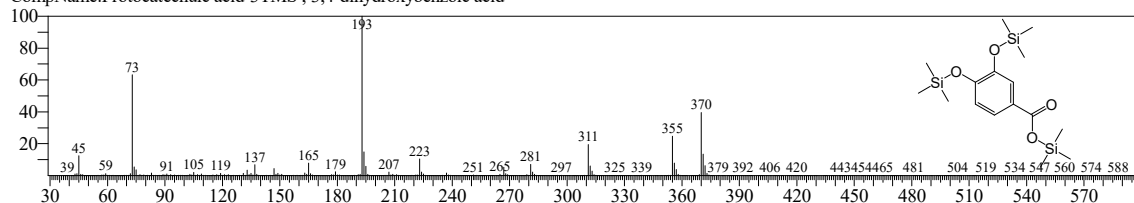

Hit#:2 Entry:211 Library:OA\_TMS\_DB5\_67min\_V3.lib

SI:28 Formula:C13H22O3Si2 CAS:99-96-7 MolWeight:282 RetIndex:1636

CompName:4-Hydroxybenzoic acid-2TMS ; 4-hydroxybenzoic acid

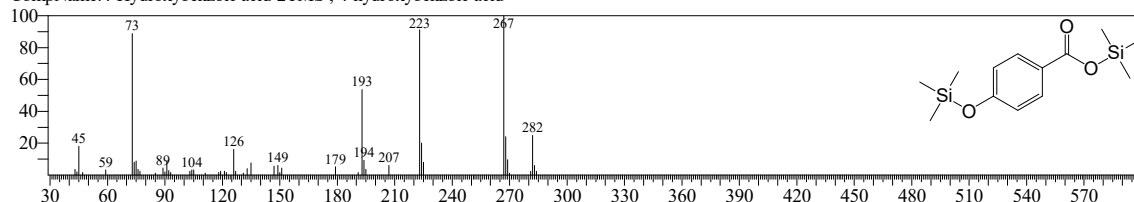

Hit#:3 Entry:438 Library:OA\_TMS\_DB5\_67min\_V3.lib

SI:28 Formula:C12H22N2O2Si2 CAS:104-98-3 MolWeight:282 RetIndex:2014

CompName:Urocanic acid-2TMS ; (E)-3-(1H-imidazol-5-yl)prop-2-enoic acid

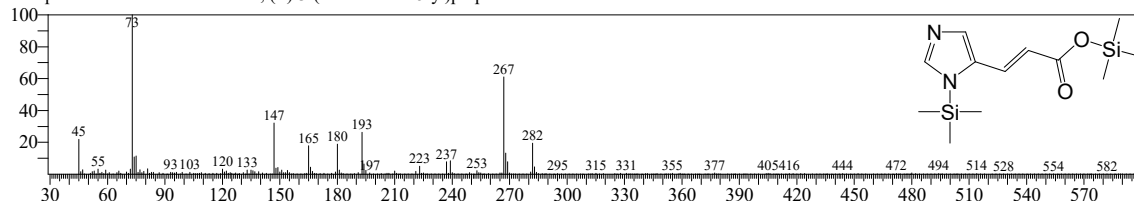

Hit#:4 Entry:290 Library:OA\_TMS\_DB5\_67min\_V3.lib

SI:27 Formula:C13H23NO3Si2 CAS:548-93-6 MolWeight:297 RetIndex:1773

CompName:3-Hydroxyanthranilic acid-2TMS ; 2-amino-3-hydroxybenzoic acid

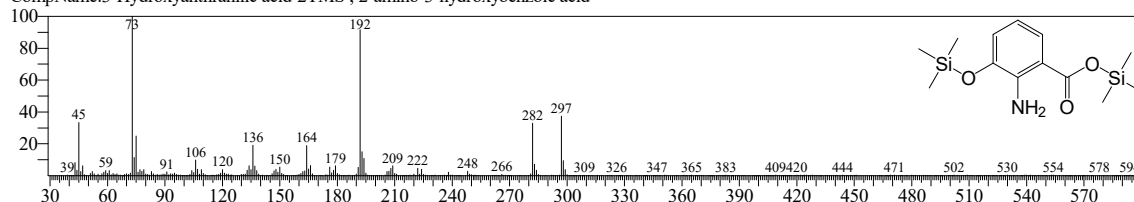

Hit#:5 Entry:402 Library:OA\_TMS\_DB5\_67min\_V3.lib

SI:27 Formula:C20H42O4Si4 CAS:775-01-9 MolWeight:458 RetIndex:1942

CompName:3,4-Dihydroxymandelic acid-4TMS ; 2-(3,4-dihydroxyphenyl)-2-hydroxyacetic acid

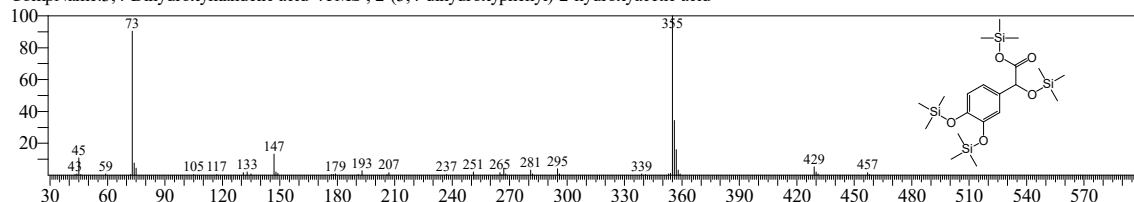

# TNAU

<< Target >>

Line#:12 R.Time:31.300(Scan#:5361) MassPeaks:287

RawMode:Averaged 31.295-31.305(5360-5362) BasePeak:207.00(1701)

BG Mode:Calc. from Peak Group 1 - Event 1 Q3 Scan

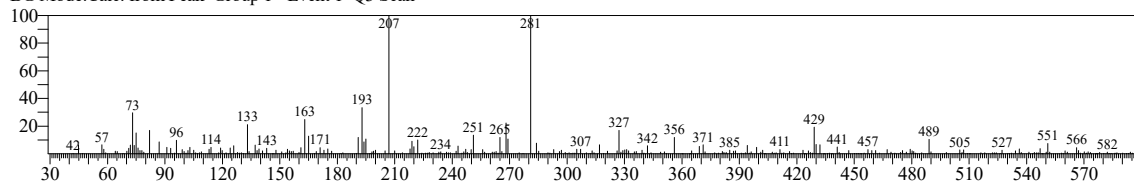

Hit#:1 Entry:315 Library:OA\_TMS\_DB5\_67min\_V3.lib

SI:44 Formula:C16H30O4Si3 CAS:99-50-3 MolWeight:370 RetIndex:1833

CompName:Protocatechuic acid-3TMS ; 3,4-dihydroxybenzoic acid

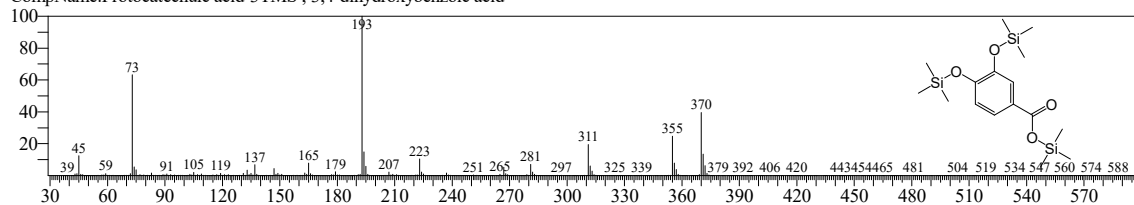

Hit#:2 Entry:343 Library:OA\_TMS\_DB5\_67min\_V3.lib

SI:38 Formula:C18H37NO3Si3 CAS:51-43-4 MolWeight:399 RetIndex:1868

CompName:Epinephrine-3TMS ; 4-[(1R)-1-hydroxy-2-(methylamino)ethyl]benzene-1,2-diol

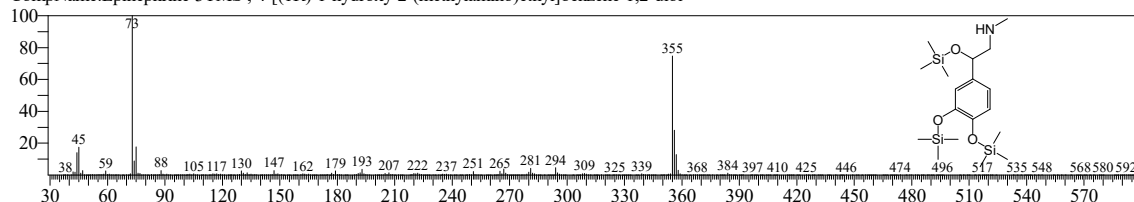

Hit#:3 Entry:328 Library:OA\_TMS\_DB5\_67min\_V3.lib

SI:37 Formula:C13H23NO2Si2 CAS:150-13-0 MolWeight:281 RetIndex:1845

CompName:4-Aminobenzoic acid-2TMS ; 4-aminobenzoic acid

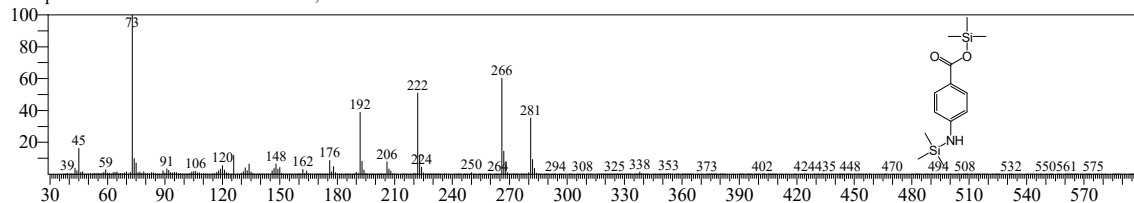

Hit#:4 Entry:194 Library:OA\_TMS\_DB5\_67min\_V3.lib

SI:36 Formula:C15H26O3Si2 CAS:828-01-3 MolWeight:310 RetIndex:1599

CompName:3-Phenyllactic acid-2TMS ; 2-hydroxy-3-phenylpropanoic acid

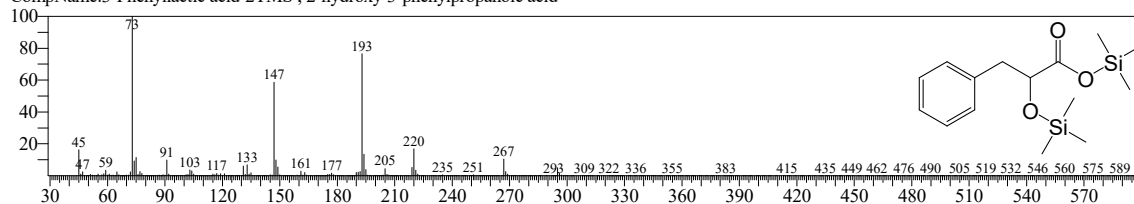

Hit#:5 Entry:256 Library:OA\_TMS\_DB5\_67min\_V3.lib

SI:36 Formula: CAS:0-00-0 MolWeight:472 RetIndex:1698

CompName:Ribose-13C5-meto-4TMS ;

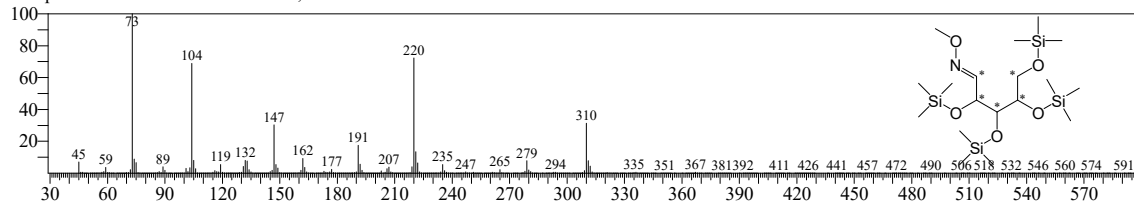

# TNAU

<< Target >>

Line#:13 R.Time:31.795(Scan#:5460) MassPeaks:311

RawMode:Averaged 31.790-31.800(5459-5461) BasePeak:281.05(1884)

BG Mode:Calc. from Peak Group 1 - Event 1 Q3 Scan

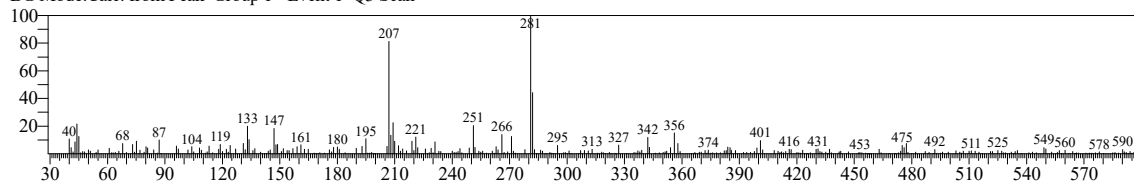

Hit#:1 Entry:384 Library:OA TMS DB5\_67min\_V3.lib

SI:41 Formula:C17H35NO3Si3 CAS:65-23-6 MolWeight:385 RetIndex:1919

CompName:Pyridoxine-3TMS ; 4,5-bis(hydroxymethyl)-2-methylpyridin-3-ol

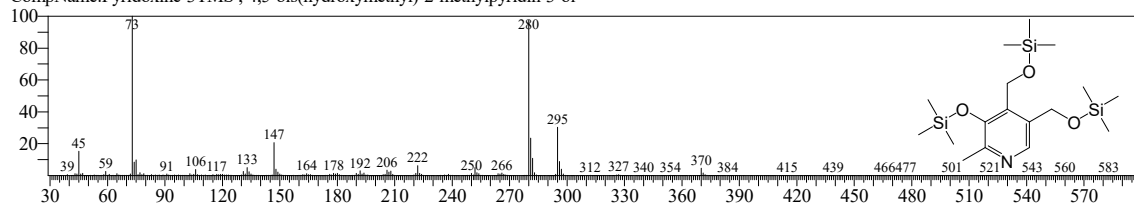

Hit#:2 Entry:328 Library:OA TMS DB5\_67min\_V3.lib

SI:41 Formula:C13H23NO2Si2 CAS:150-13-0 MolWeight:281 RetIndex:1845

CompName:4-Aminobenzoic acid-2TMS ; 4-aminobenzoic acid

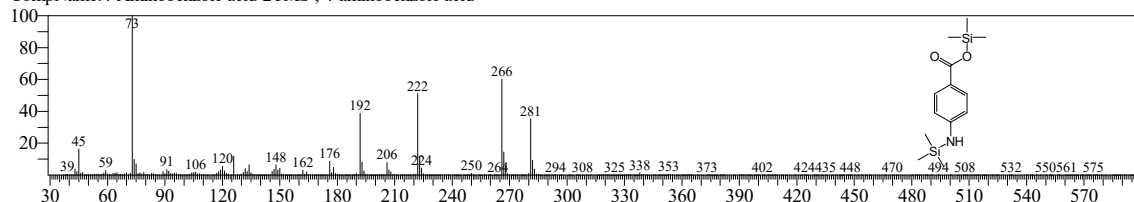

Hit#:3 Entry:343 Library:OA TMS DB5\_67min\_V3.lib

SI:38 Formula:C18H37NO3Si3 CAS:51-43-4 MolWeight:399 RetIndex:1868

CompName:Epinephrine-3TMS ; 4-[(1R)-1-hydroxy-2-(methylamino)ethyl]benzene-1,2-diol

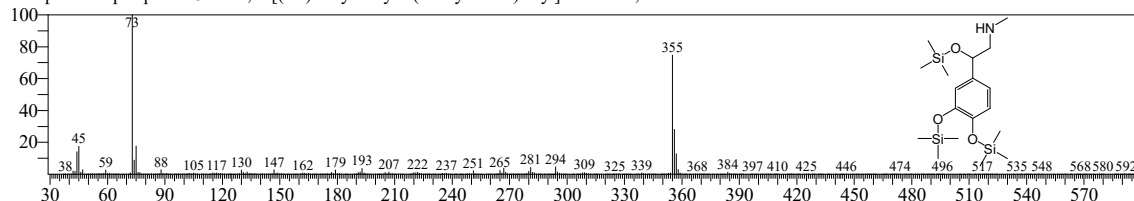

Hit#:4 Entry:461 Library:OA TMS DB5\_67min\_V3.lib

SI:36 Formula:C20H37NO4Si3 CAS:537-55-3 MolWeight:439 RetIndex:2119

CompName:N-Acetyltyrosine-3TMS ; (2S)-2-acetamido-3-(4-hydroxyphenyl)propanoic acid

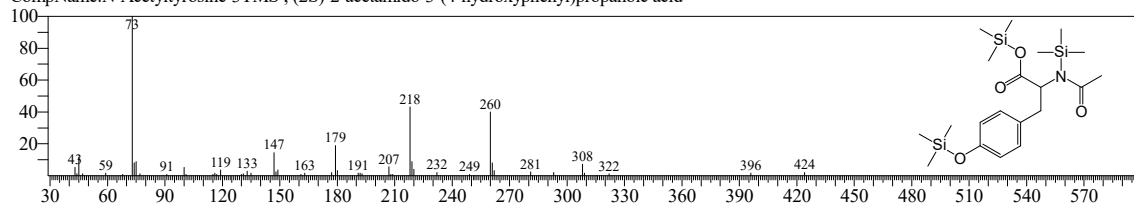

Hit#:5 Entry:184 Library:OA TMS DB5\_67min\_V3.lib

SI:35 Formula:C14H24O3Si2 CAS:614-75-5 MolWeight:296 RetIndex:1579

CompName:2-Hydroxyphenylacetic acid-2TMS ; 2-(2-hydroxyphenyl)acetic acid

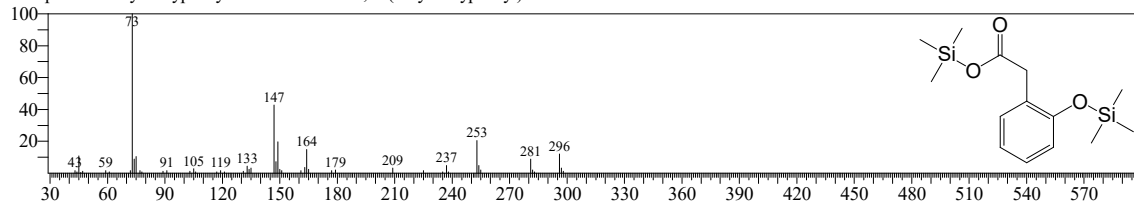

# TNAU

<< Target >>

Line#:14 R.Time:31.895(Scan#:5480) MassPeaks:303

RawMode:Averaged 31.890-31.900(5479-5481) BasePeak:139.10(1752)

BG Mode:Calc. from Peak Group 1 - Event 1 Q3 Scan

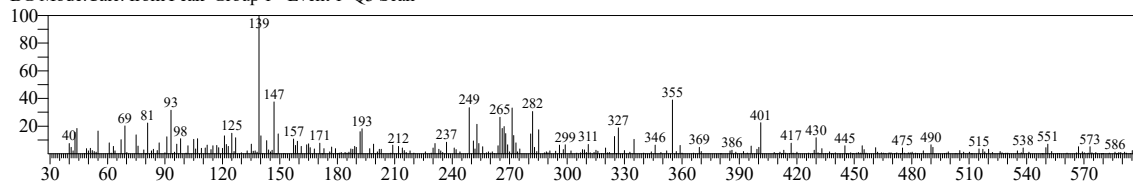

Hit#:1 Entry:203 Library:OA\_TMS\_DB5\_67min\_V3.lib

SI:27 Formula:C13H23NO2Si2 CAS:118-92-3 MolWeight:281 RetIndex:1623

CompName:Anthranilic acid-2TMS ; 2-aminobenzoic acid

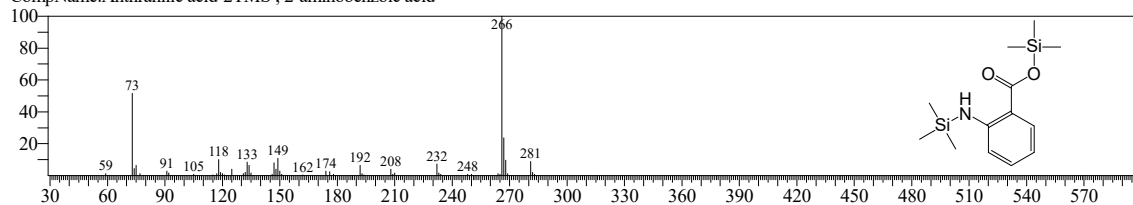

Hit#:2 Entry:179 Library:OA\_TMS\_DB5\_67min\_V3.lib

SI:27 Formula:C13H22O3Si2 CAS:99-06-9 MolWeight:282 RetIndex:1572

CompName:3-Hydroxybenzoic acid-2TMS ; 3-hydroxybenzoic acid

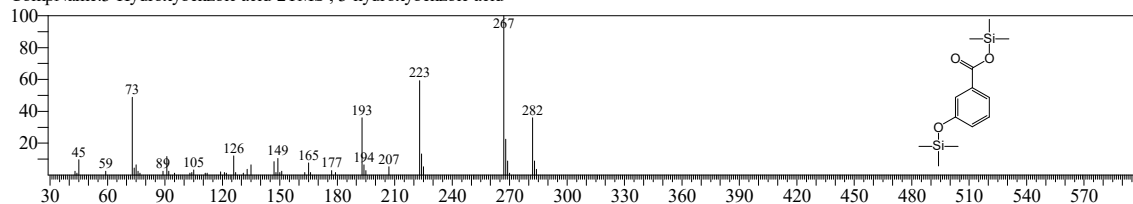

Hit#:3 Entry:477 Library:OA\_TMS\_DB5\_67min\_V3.lib

SI:27 Formula:C21H46OSi CAS:112-92-5 MolWeight:342 RetIndex:2156

CompName:Octadecanol-TMS ; octadecan-1-ol

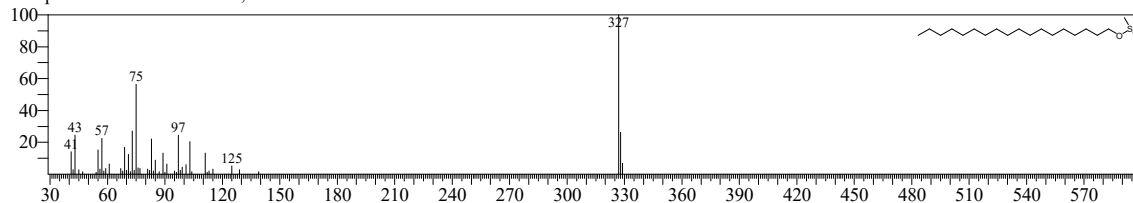

Hit#:4 Entry:310 Library:OA\_TMS\_DB5\_67min\_V3.lib

SI:26 Formula:C11H20N4OSi2 CAS:68-94-0 MolWeight:280 RetIndex:1822

CompName:Hypoxanthine-2TMS ; 3,7-dihydropurin-6-one

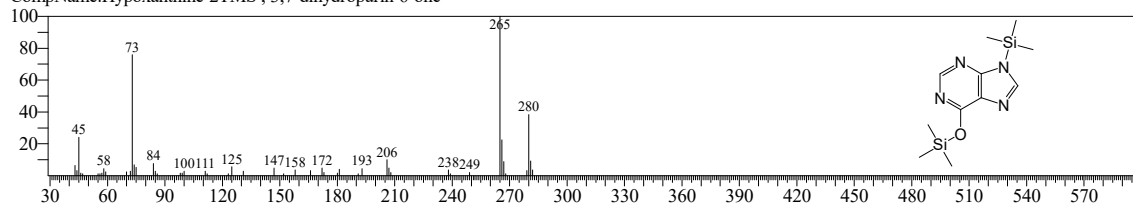

Hit#:5 Entry:211 Library:OA\_TMS\_DB5\_67min\_V3.lib

SI:26 Formula:C13H22O3Si2 CAS:99-96-7 MolWeight:282 RetIndex:1636

CompName:4-Hydroxybenzoic acid-2TMS ; 4-hydroxybenzoic acid

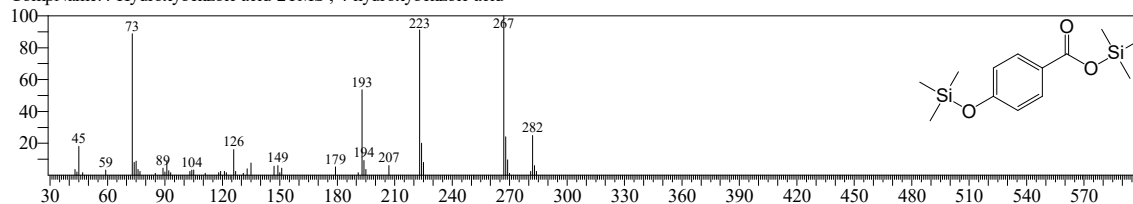

# TNAU

<< Target >>

Line#:15 R.Time:32.015(Scan#:5504) MassPeaks:302

RawMode:Averaged 32.010-32.020(5503-5505) BasePeak:207.05(1794)

BG Mode:Calc. from Peak Group 1 - Event 1 Q3 Scan

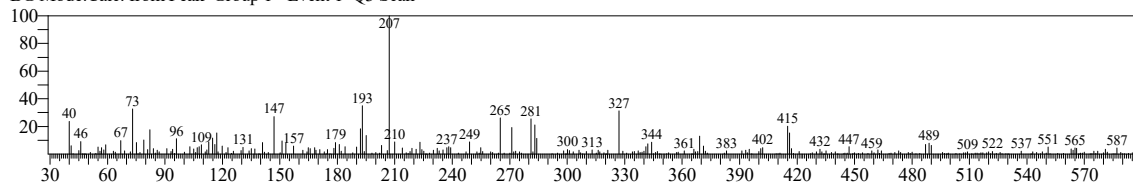

Hit#:1 Entry:382 Library:OA TMS DB5 67min V3.lib

SI:36 Formula:C18H34O4Si3 CAS:6482-98-0 MolWeight:398 RetIndex:1918

CompName:4-Hydroxyphenyllactic acid-3TMS ; 2-hydroxy-3-(4-hydroxyphenyl)propanoate

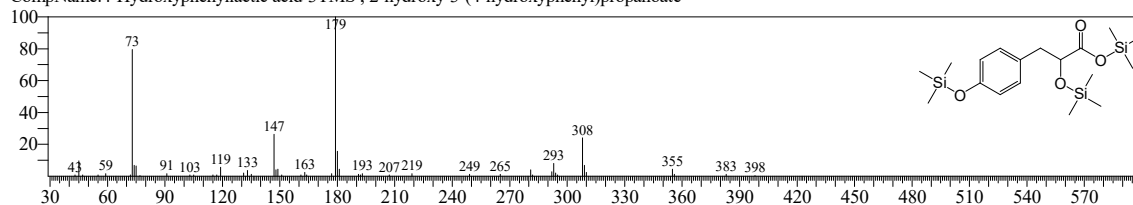

Hit#:2 Entry:431 Library:OA TMS DB5 67min V3.lib

SI:34 Formula:C21H45NO3Si4 CAS:51-43-4 MolWeight:471 RetIndex:1989

CompName:Epinephrine-4TMS ; 4-[(1R)-1-hydroxy-2-(methylamino)ethyl]benzene-1,2-diol

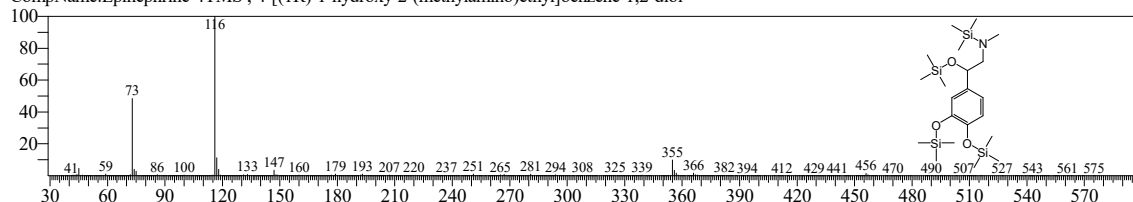

Hit#:3 Entry:315 Library:OA TMS DB5 67min V3.lib

SI:32 Formula:C16H30O4Si3 CAS:99-50-3 MolWeight:370 RetIndex:1833

CompName:Protocatechuic acid-3TMS ; 3,4-dihydroxybenzoic acid

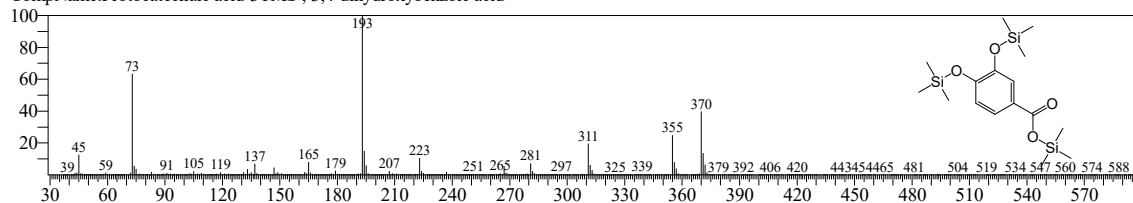

Hit#:4 Entry:328 Library:OA TMS DB5 67min V3.lib

SI:32 Formula:C13H23NO2Si2 CAS:150-13-0 MolWeight:281 RetIndex:1845

CompName:4-Aminobenzoic acid-2TMS ; 4-aminobenzoic acid

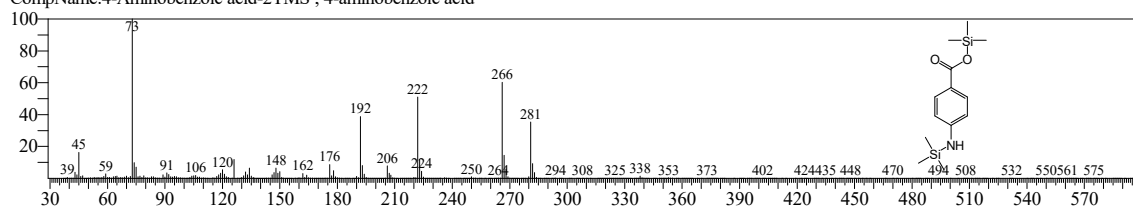

Hit#:5 Entry:310 Library:OA TMS DB5 67min V3.lib

SI:31 Formula:C11H20N4OSi2 CAS:68-94-0 MolWeight:280 RetIndex:1822

CompName:Hypoxanthine-2TMS ; 3,7-dihydropurin-6-one

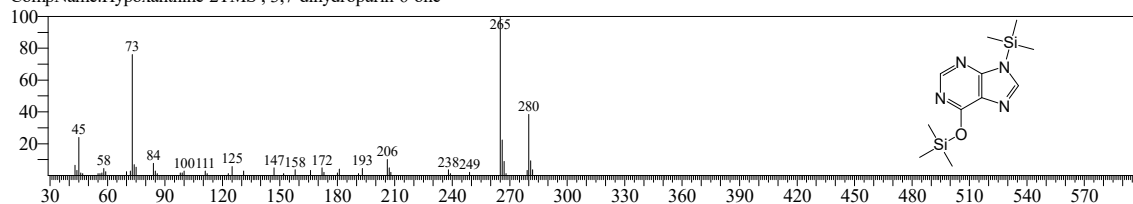

Supplement: Supplementary file 2 [file supplementary]
