# Supplementary material for: Comparative Metabolomics Profiling Reveals Key Metabolites and Associated Pathways Regulating Tuber Dormancy in White Yam (<em>Dioscorea rotundata</em>)
Source: Preprints.org preprint supplement (doi:10.20944/preprints202303.0378.v1), 2023-03-21

# TNAU

## Sample Information

Analyzed by : Admin  
 Analyzed : 05-Aug-22 12:03:49 AM  
 Sample Type : Unknown  
 Level # : 1  
 Sample Name : C101-2  
 Sample ID : C101-2  
 IS Amount : [1]=1  
 Sample Amount : 1  
 Dilution Factor : 1  
 Vial # : 12  
 Injection Volume : 1.00  
 Data File : D:\GCMS-8040NX\Aug 2022\Users\04.08.2022\Data files\04082022-012.qgd  
 Org Data File : D:\GCMS-8040NX\Aug 2022\Users\04.08.2022\Data files\04082022-012.qgd  
 Method File : D:\GCMS-8040NX\Aug 2022\Users\04.08.2022\Method file\27072022\_methodfile.qgm  
 Org Method File : D:\GCMS-8040NX\Aug 2022\Users\04.08.2022\Method file\27072022\_methodfile.qgm  
 Report File :  
 Tuning File : D:\GCMS-8040NX\Aug 2022\Tuning Data\TUNING 04082022.qgt  
 [Comment]  
 Jerry samples  
 Modified by : Admin  
 Modified : 05-Aug-22 4:29:10 PM

Chromatogram C101-2 D:\GCMS-8040NX\Aug 2022\Users\04.08.2022\Data files\04082022-012.qgd

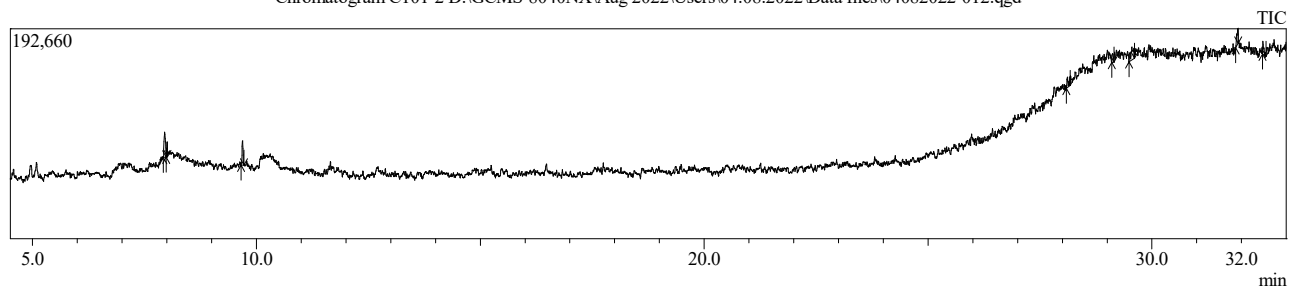

Peak Report TIC

| Peak# | R.Time | Area   | Area%  | Height | Height% | A/H  | Similarity | Name                            |
|-------|--------|--------|--------|--------|---------|------|------------|---------------------------------|
| 1     | 7.949  | 53559  | 23.22  | 22826  | 21.32   | 2.35 | 83         | Undecane, 3-methyl-             |
| 2     | 7.995  | 6582   | 2.85   | 8069   | 7.54    | 0.82 | 43         | Juniperic acid-2TMS             |
| 3     | 9.689  | 37360  | 16.20  | 22272  | 20.80   | 1.68 | 88         | Dodecane                        |
| 4     | 28.110 | 23187  | 10.05  | 9416   | 8.79    | 2.46 | 31         | 3,4-Dihydroxymandelic acid-4TMS |
| 5     | 29.110 | 16039  | 6.95   | 6698   | 6.26    | 2.39 | 38         | Batyl alcohol-2TMS              |
| 6     | 29.553 | 47317  | 20.52  | 11895  | 11.11   | 3.98 | 33         | 4-Aminobenzoic acid-2TMS        |
| 7     | 31.917 | 28981  | 12.57  | 13903  | 12.98   | 2.08 | 35         | Arabinose-4TMS(1)               |
| 8     | 32.480 | 17597  | 7.63   | 12002  | 11.21   | 1.47 | 29         | Isomaltose-meto-8TMS(2)         |
|       |        | 230622 | 100.00 | 107081 | 100.00  |      |            |                                 |

Library

# TNAU

<< Target >>

Line#:1 R.Time:7.950(Scan#:691) MassPeaks:295

RawMode:Averaged 7.945-7.955(690-692) BasePeak:57.10(4542)

BG Mode:Calc. from Peak Group 1 - Event 1 Q3 Scan

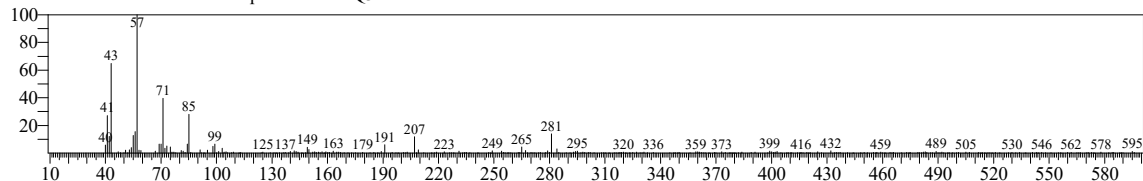

Hit#:1 Entry:16184 Library:NIST20R.lib

SI:83 Formula:C<sub>12</sub>H<sub>26</sub> CAS:1002-43-3 MolWeight:170 RetIndex:1150

CompName:Undecane, 3-methyl- \$\$ 3-Methylundecane \$\$ 2-Ethyl-decane

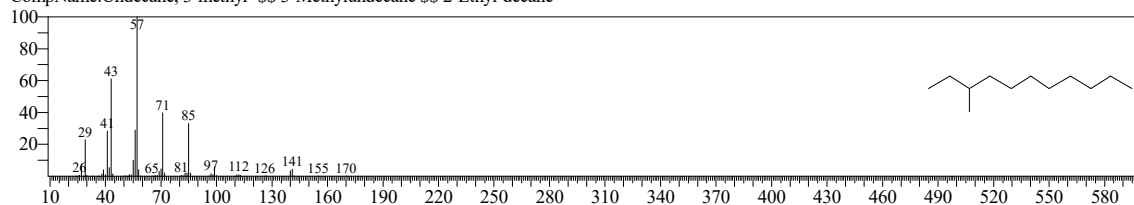

Hit#:2 Entry:21042 Library:NIST20M1.lib

SI:83 Formula:C<sub>11</sub>H<sub>24</sub> CAS:1120-21-4 MolWeight:156 RetIndex:1100

CompName:Undecane \$\$ n-Undecane \$\$ Hendecane \$\$ n-C<sub>11</sub>H<sub>24</sub> \$\$ UN 2330

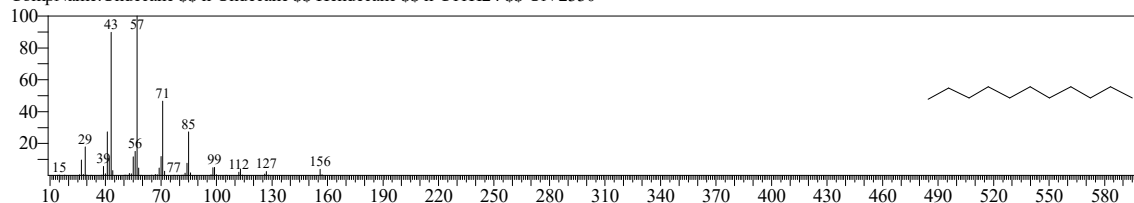

Hit#:3 Entry:40233 Library:NIST20M1.lib

SI:83 Formula:C<sub>13</sub>H<sub>28</sub> CAS:17453-94-0 MolWeight:184 RetIndex:1249

CompName:Undecane, 5-ethyl- \$\$ 5-Ethylundecane #

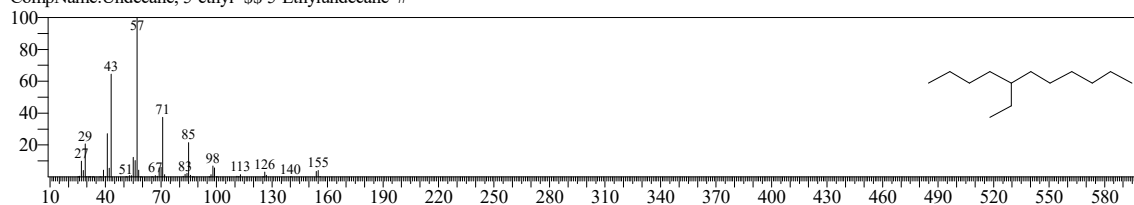

Hit#:4 Entry:21045 Library:NIST20M1.lib

SI:83 Formula:C<sub>11</sub>H<sub>24</sub> CAS:62016-37-9 MolWeight:156 RetIndex:922

CompName:Octane, 2,4,6-trimethyl- \$\$ 2,4,6-Trimethyloctane #

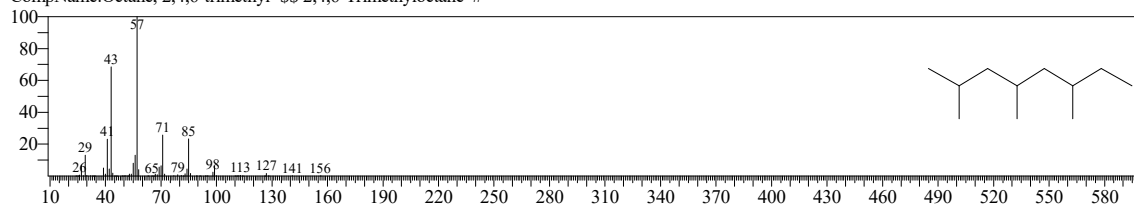

Hit#:5 Entry:27737 Library:NIST20R.lib

SI:83 Formula:C<sub>16</sub>H<sub>34</sub> CAS:544-76-3 MolWeight:226 RetIndex:1600

CompName:Hexadecane \$\$ n-Cetane \$\$ n-Hexadecane \$\$ Cetane

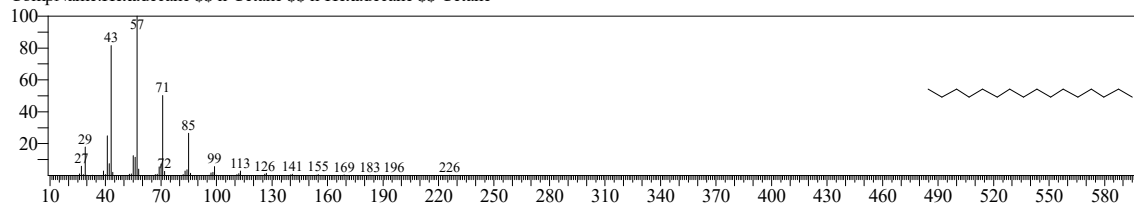

# TNAU

<< Target >>

Line#:2 R.Time:7.995(Scan#:700) MassPeaks:302

RawMode:Averaged 7.990-8.000(699-701) BasePeak:57.05(523)

BG Mode:Calc. from Peak Group 1 - Event 1 Q3 Scan

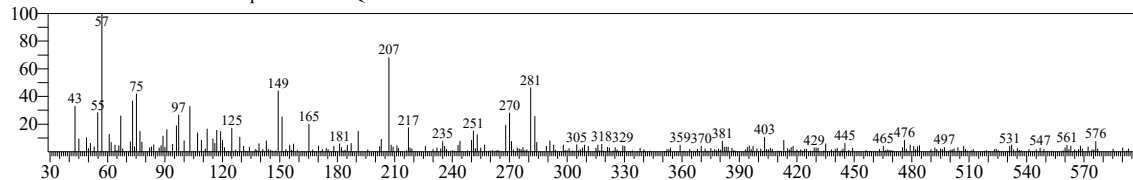

Hit#:1 Entry:511 Library:OA\_TMS\_DB5\_67min\_V3.lib

SI:43 Formula:C22H48O3Si2 CAS:506-13-8 MolWeight:416 RetIndex:2396

CompName:Juniperic acid-2TMS ; 16-hydroxyhexadecanoic acid

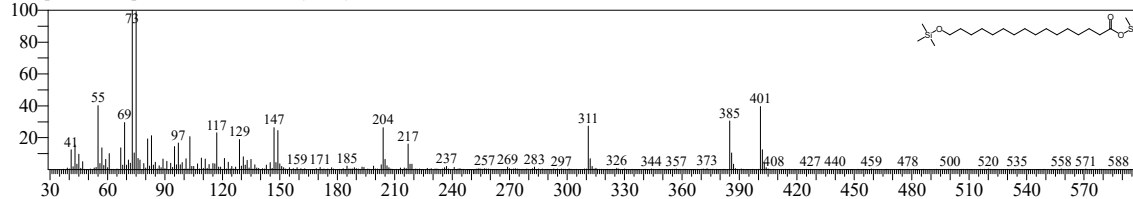

Hit#:2 Entry:169 Library:OA\_TMS\_DB5\_67min\_V3.lib

SI:40 Formula:C14H32O3Si2 CAS:17173-14-7 MolWeight:304 RetIndex:1551

CompName:7-Hydroxooctanoic acid-2TMS ; 7-hydroxyoctanoic acid

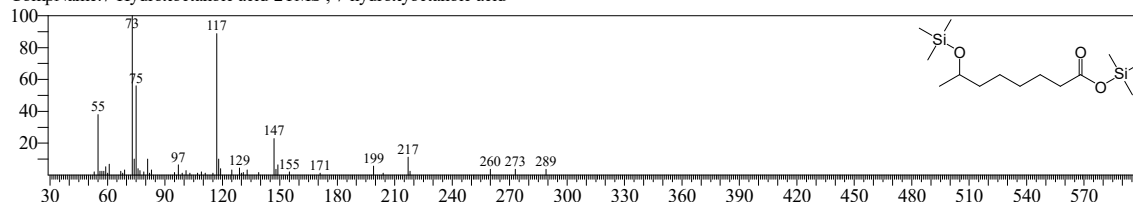

Hit#:3 Entry:455 Library:OA\_TMS\_DB5\_67min\_V3.lib

SI:40 Formula:C18H38O4Si2 CAS:693-23-2 MolWeight:374 RetIndex:2092

CompName:Dodecanedioic acid-2TMS ; dodecanedioic acid

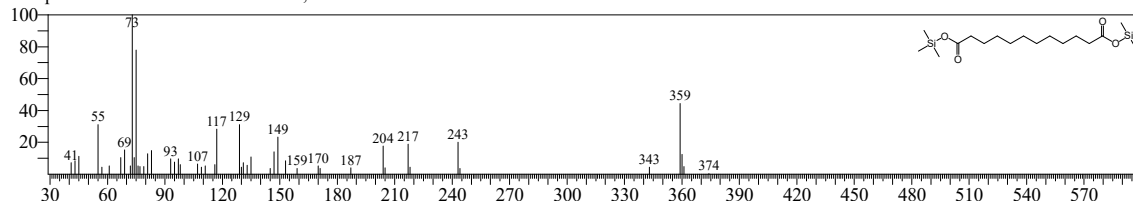

Hit#:4 Entry:300 Library:OA\_TMS\_DB5\_67min\_V3.lib

SI:40 Formula:C15H32O4Si2 CAS:123-99-9 MolWeight:332 RetIndex:1799

CompName:Azelaic acid-2TMS ; nonanedioic acid

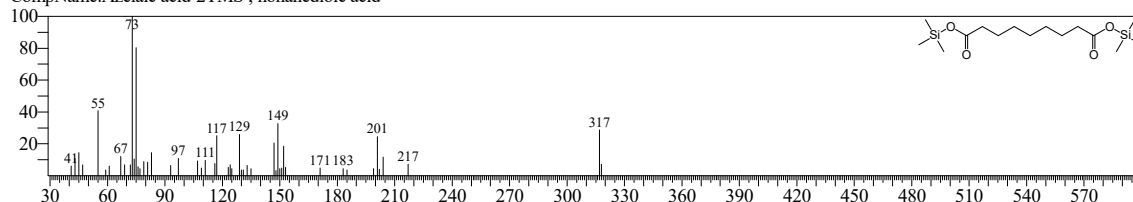

Hit#:5 Entry:362 Library:OA\_TMS\_DB5\_67min\_V3.lib

SI:39 Formula:C16H34O4Si2 CAS:111-20-6 MolWeight:346 RetIndex:1896

CompName:Sebacic acid-2TMS ; decanedioic acid

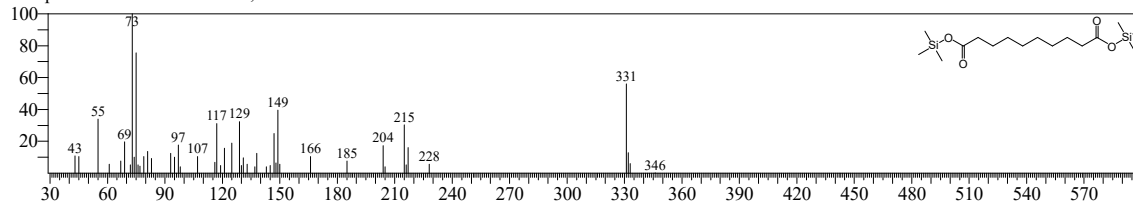

# TNAU

<< Target >>

Line#3 R.Time:9.690(Scan#:1039) MassPeaks:228

RawMode:Averaged 9.685-9.695(1038-1040) BasePeak:57.10(5564)

BG Mode:Calc. from Peak Group 1 - Event 1 Q3 Scan

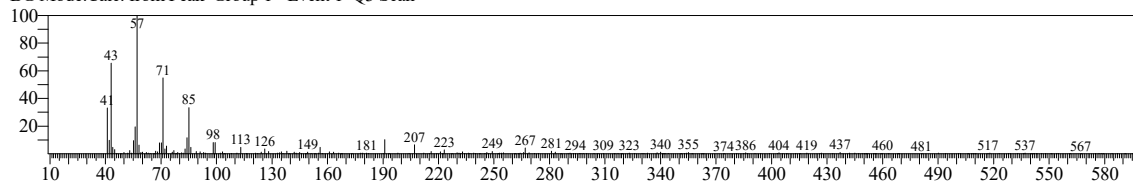

Hit#1 Entry:30057 Library:NIST20M1.lib

SI:88 Formula:C12H26 CAS:112-40-3 MolWeight:170 RetIndex:1200

CompName:Dodecane \$\$ n-Dodecane \$\$ Adakane 12 \$\$ Ba 51-090453 \$\$ CH3(CH2)10CH3 \$\$ Bihexyl \$\$ Dihexyl \$\$ Duodecane \$\$ NSC 8714

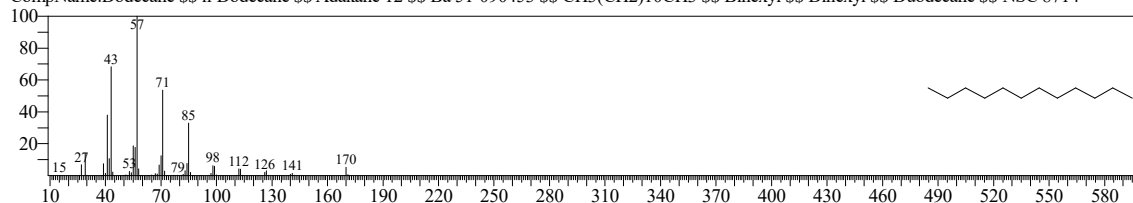

Hit#2 Entry:12897 Library:NIST20R.lib

SI:88 Formula:C11H24 CAS:1120-21-4 MolWeight:156 RetIndex:1100

CompName:Undecane \$\$ n-Undecane \$\$ Hendecane \$\$ n-C11H24 \$\$ UN 2330

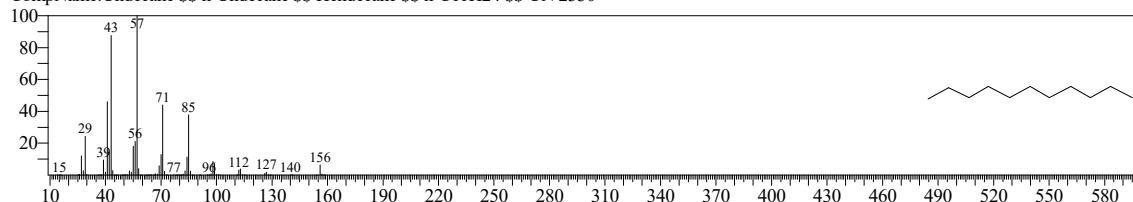

Hit#3 Entry:19412 Library:NIST20R.lib

SI:87 Formula:C13H28 CAS:629-50-5 MolWeight:184 RetIndex:1300

CompName:Tridecane \$\$ n-Tridecane \$\$ Tridecane, n-

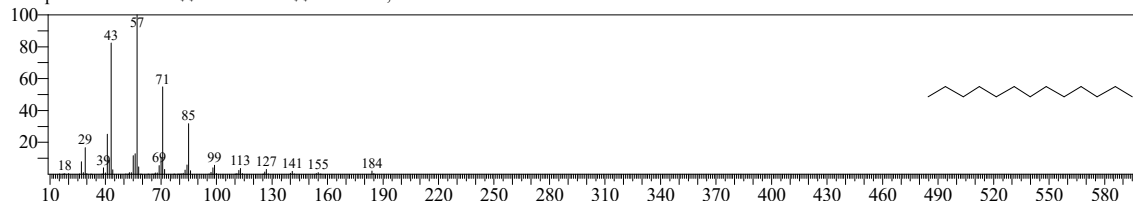

Hit#4 Entry:22497 Library:NIST20R.lib

SI:87 Formula:C14H30 CAS:629-59-4 MolWeight:198 RetIndex:1400

CompName:Tetradecane \$\$ n-Tetradecane

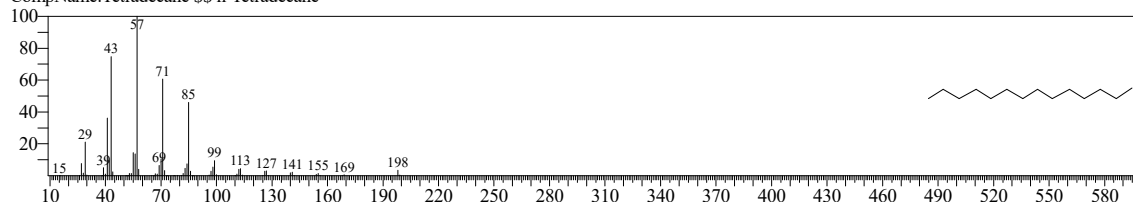

Hit#5 Entry:21047 Library:NIST20M1.lib

SI:87 Formula:C11H24 CAS:17302-32-8 MolWeight:156 RetIndex:986

CompName:Nonane, 3,7-dimethyl- \$\$ 3,7-Dimethylnonane

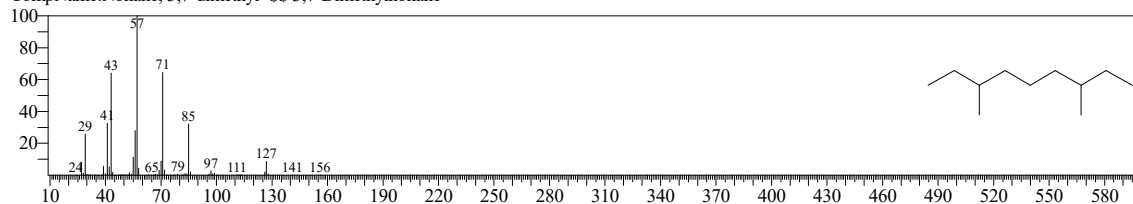

&lt;&lt; Target &gt;&gt;

Line#:4 R.Time:28.110(Scan#:4723) MassPeaks:315

RawMode:Averaged 28.105-28.115(4722-4724) BasePeak:207.05(720)

BG Mode:Calc. from Peak Group 1 - Event 1 Q3 Scan

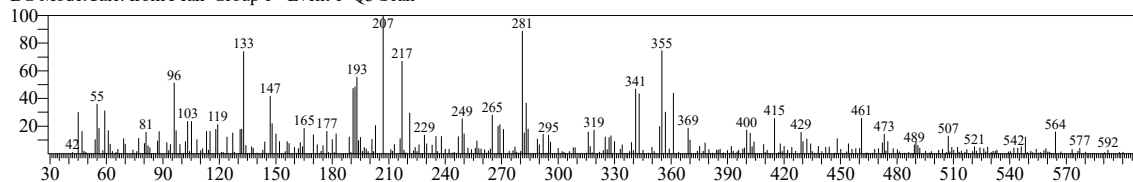

Hit#:1 Entry:402 Library:OA\_TMS\_DB5\_67min\_V3.lib

SI:31 Formula:C<sub>20</sub>H<sub>42</sub>O<sub>4</sub>Si<sub>4</sub> CAS:775-01-9 MolWeight:458 RetIndex:1942

CompName:3,4-Dihydroxymandelic acid-4TMS ; 2-(3,4-dihydroxyphenyl)-2-hydroxyacetic acid

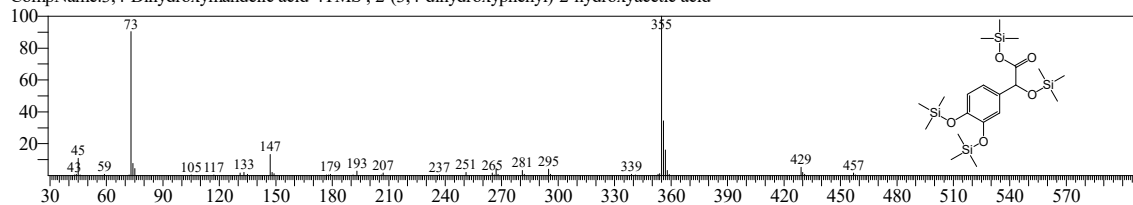

Hit#:2 Entry:9 Library:OA\_TMS\_DB5\_67min\_V3.lib

SI:29 Formula: C<sub>8</sub>H<sub>10</sub>O<sub>4</sub>Si<sub>2</sub> CAS:0-00-0 MolWeight:237 RetIndex:1062

CompName:Lactic acid-13C3-2TMS ;

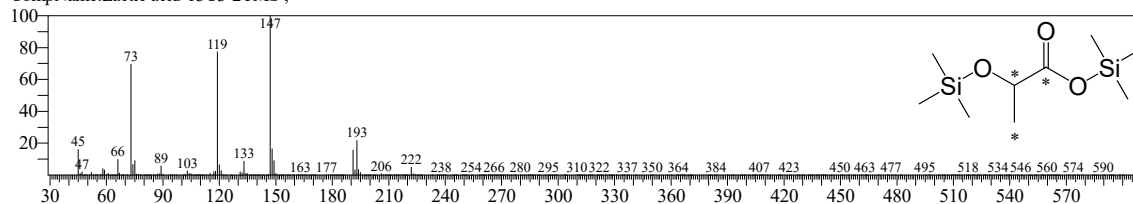

Hit#:3 Entry:354 Library:OA\_TMS\_DB5\_67min\_V3.lib

SI:29 Formula:C<sub>16</sub>H<sub>13</sub>NO<sub>3</sub>Si<sub>3</sub> CAS:548-93-6 MolWeight:369 RetIndex:1886

CompName:3-Hydroxyanthranilic acid-3TMS ; 2-amino-3-hydroxybenzoic acid

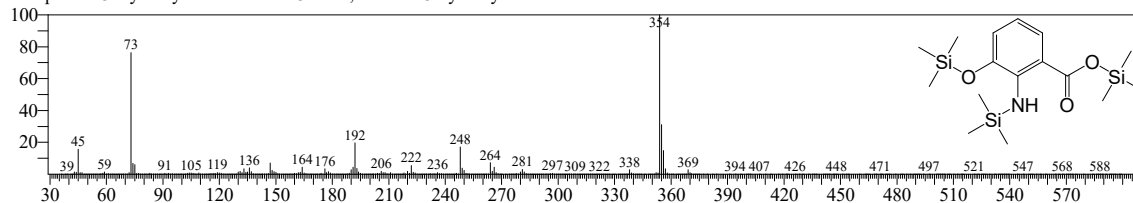

Hit#:4 Entry:559 Library:OA\_TMS\_DB5\_67min\_V3.lib

SI:28 Formula:C<sub>39</sub>H<sub>96</sub>O<sub>11</sub>Si<sub>9</sub> CAS:585-88-6 MolWeight:992 RetIndex:2923

CompName:Maltitol-9TMS ; (2S,3R,4R,5R)-4-[(2R,3R,4S,5S,6R)-3,4,5-trihydroxy-6-(hydroxymethyl)oxan-2-yl]oxyhexane-1,2,3,5,6-pentol

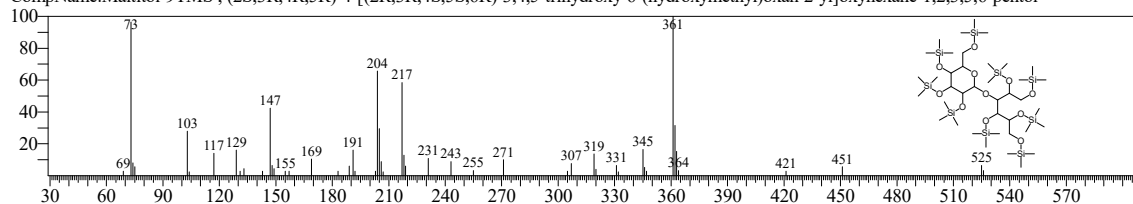

Hit#:5 Entry:315 Library:OA\_TMS\_DB5\_67min\_V3.lib

SI:28 Formula:C<sub>16</sub>H<sub>30</sub>O<sub>4</sub>Si<sub>3</sub> CAS:99-50-3 MolWeight:370 RetIndex:1833

CompName:Protocatechuic acid-3TMS ; 3,4-dihydroxybenzoic acid

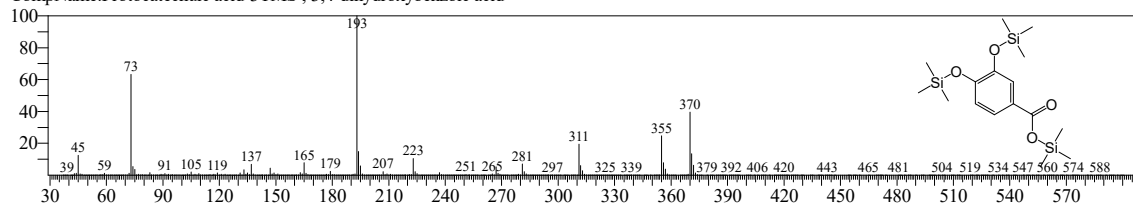

# TNAU

<< Target >>

Line#:5 R.Time:29.110(Scan#:4923) MassPeaks:285

RawMode:Averaged 29.105-29.115(4922-4924) BasePeak:207.00(1828)

BG Mode:Calc. from Peak Group 1 - Event 1 Q3 Scan

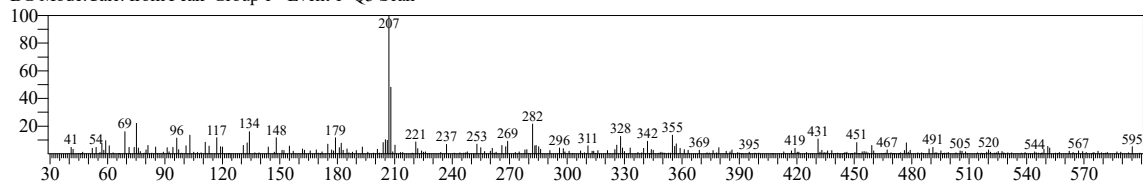

Hit#:1 Entry:539 Library:OA\_TMS\_DB5\_67min\_V3.lib

SI:38 Formula:C27H60O3Si2 CAS:544-62-7 MolWeight:488 RetIndex:2684

CompName:Batyl alcohol-2TMS ; 3-octadecoxypropane-1,2-diol

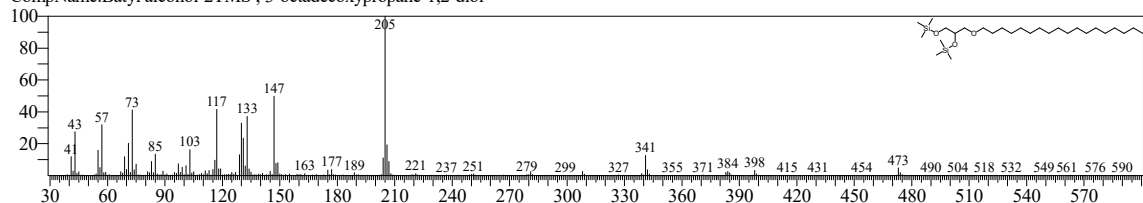

Hit#:2 Entry:308 Library:OA\_TMS\_DB5\_67min\_V3.lib

SI:31 Formula:C19H42O5Si4 CAS:138-59-0 MolWeight:462 RetIndex:1819

CompName:Shikimic acid-4TMS ; 3,4,5-trihydroxycyclohexene-1-carboxylic acid

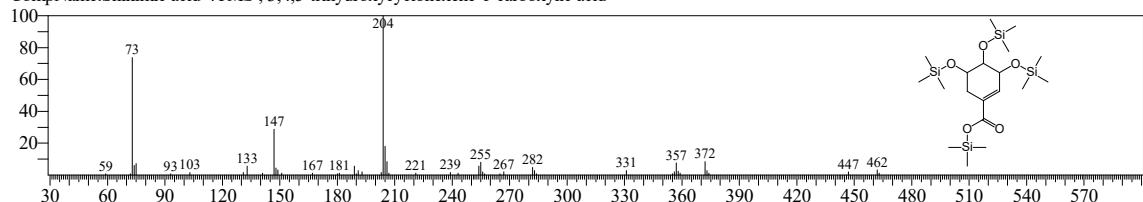

Hit#:3 Entry:10 Library:OA\_TMS\_DB5\_67min\_V3.lib

SI:31 Formula:C10H24O3Si2 CAS:594-61-6 MolWeight:248 RetIndex:1067

CompName:2-Hydroxyisobutyric acid-2TMS ; 2-hydroxy-2-methylpropanoic acid

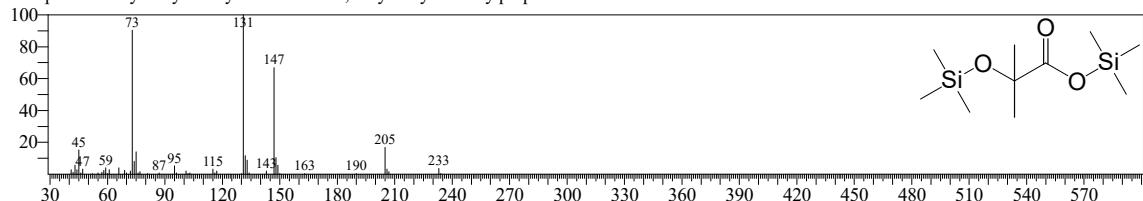

Hit#:4 Entry:276 Library:OA\_TMS\_DB5\_67min\_V3.lib

SI:30 Formula:C18H44O5Si4 CAS:154-17-6 MolWeight:452 RetIndex:1745

CompName:2-Deoxy-glucose-4TMS(1) ; (2S,4S,5S,6S)-6-(hydroxymethyl)oxane-2,4,5-triol

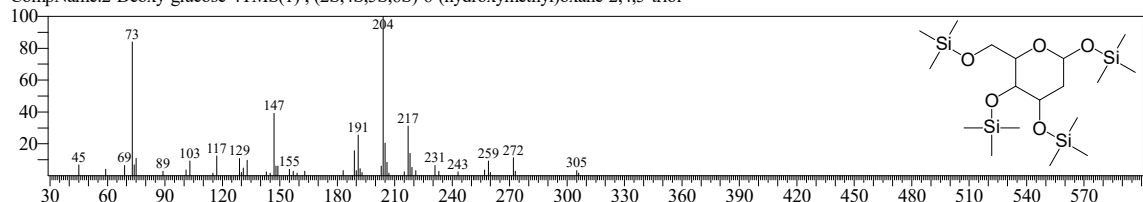

Hit#:5 Entry:219 Library:OA\_TMS\_DB5\_67min\_V3.lib

SI:30 Formula:C18H44O5Si4 CAS:10485-94-6 MolWeight:452 RetIndex:1646

CompName:Rhamnose-4TMS(1) ; (2R,3R,4S,5S)-2,3,4,5-tetrahydroxyhexanal

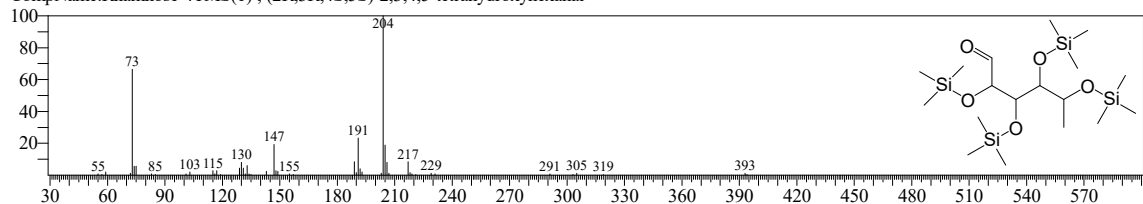

# TNAU

<< Target >>

Line#:6 R.Time:29.555(Scan#:5012) MassPeaks:321

RawMode:Averaged 29.550-29.560(5011-5013) BasePeak:207.05(3164)

BG Mode:Calc. from Peak Group 1 - Event 1 Q3 Scan

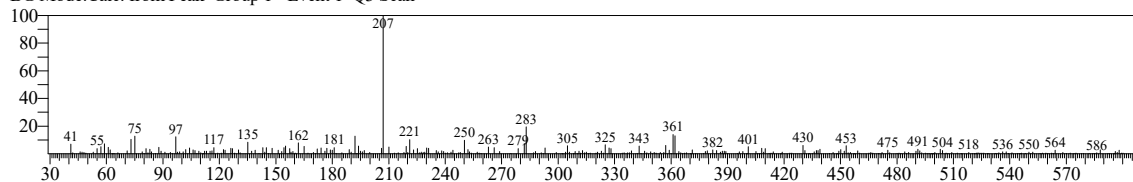

Hit#:1 Entry:328 Library:OA\_TMS\_DB5\_67min\_V3.lib

SI:33 Formula:C13H23NO2Si2 CAS:150-13-0 MolWeight:281 RetIndex:1845

CompName:4-Aminobenzoic acid-2TMS ; 4-aminobenzoic acid

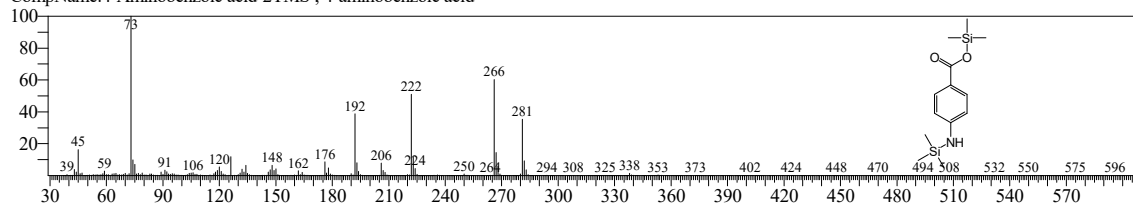

Hit#:2 Entry:290 Library:OA\_TMS\_DB5\_67min\_V3.lib

SI:33 Formula:C13H23NO3Si2 CAS:548-93-6 MolWeight:297 RetIndex:1773

CompName:3-Hydroxyanthranilic acid-2TMS ; 2-amino-3-hydroxybenzoic acid

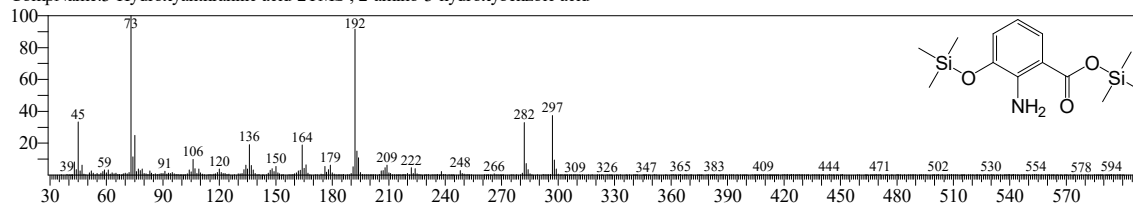

Hit#:3 Entry:32 Library:OA\_TMS\_DB5\_67min\_V3.lib

SI:33 Formula:C11H24O2Si CAS:99-66-1 MolWeight:216 RetIndex:1152

CompName:Valproic acid-TMS ; 2-propylpentanoic acid

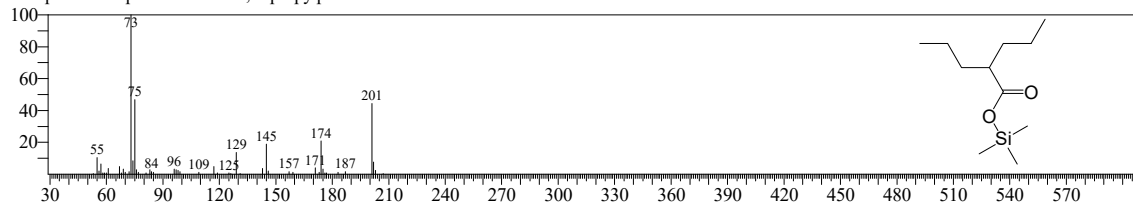

Hit#:4 Entry:336 Library:OA\_TMS\_DB5\_67min\_V3.lib

SI:32 Formula:C15H32O6Si3 CAS:32449-92-6 MolWeight:392 RetIndex:1854

CompName:Glucuronic acid lactone-3TMS(2) ; (2R)-2-[(2S,3R,4S)-3,4-dihydroxy-5-oxooxolan-2-yl]-2-hydroxyacetaldehyde

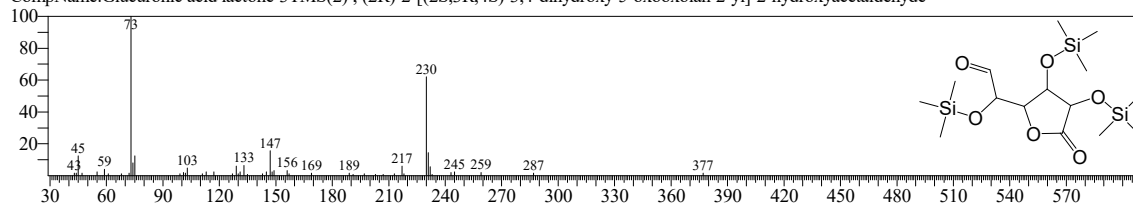

Hit#:5 Entry:3 Library:OA\_TMS\_DB5\_67min\_V3.lib

SI:31 Formula:C9H27BO3Si3 CAS:10043-35-3 MolWeight:278 RetIndex:992

CompName:Boric acid-3TMS ; boric acid

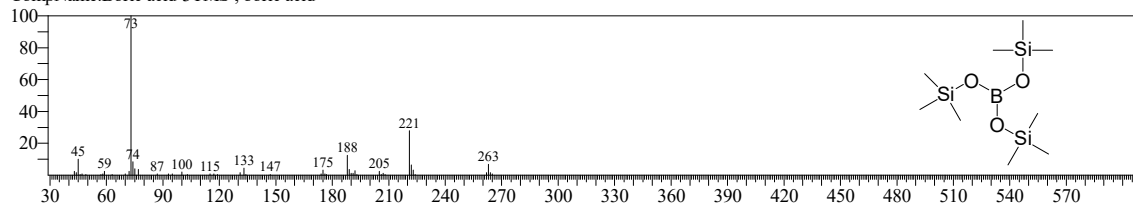

# TNAU

<< Target >>

Line#:7 R.Time:31.915(Scan#:5484) MassPeaks:326

RawMode:Averaged 31.910-31.920(5483-5485) BasePeak:139.15(887)

BG Mode:Calc. from Peak Group 1 - Event 1 Q3 Scan

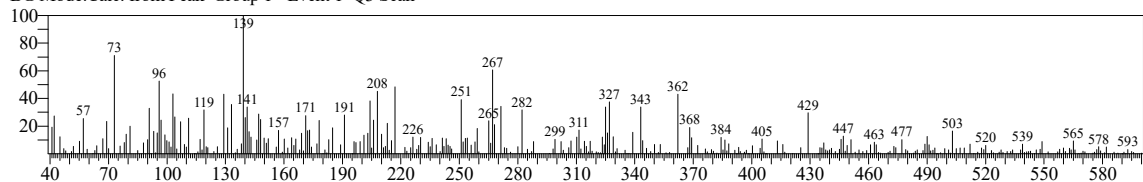

Hit#:1 Entry:210 Library:OA\_TMS\_DB5\_67min\_V3.lib

SI:35 Formula:C17H42O5Si4 CAS:10323-20-3 MolWeight:438 RetIndex:1634

CompName:Arabinose-4TMS(1) ; (2S,3R,4R)-2,3,4,5-tetrahydropentanal

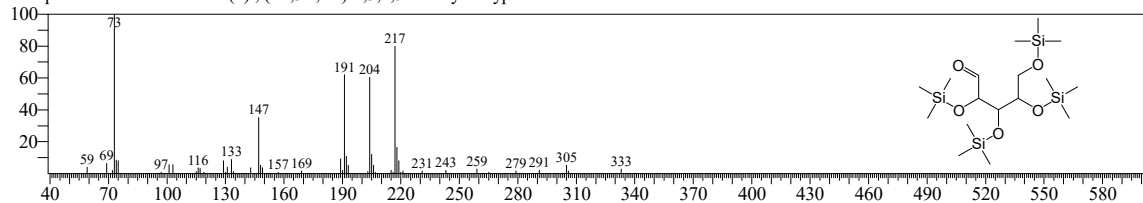

Hit#:2 Entry:250 Library:OA\_TMS\_DB5\_67min\_V3.lib

SI:35 Formula:C17H42O5Si4 CAS:50-69-1 MolWeight:438 RetIndex:1691

CompName:Ribose-4TMS(4) ; (3R,4S,5R)-5-(hydroxymethyl)oxolane-2,3,4-triol

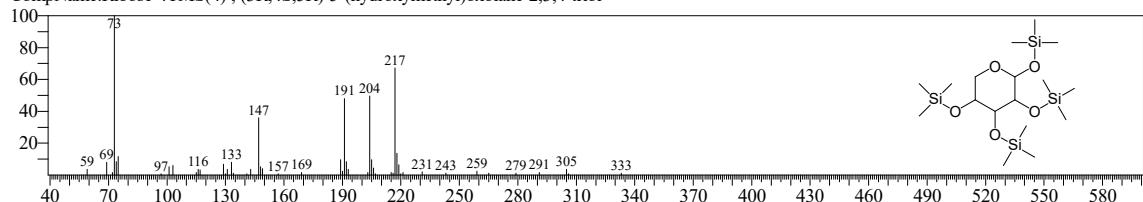

Hit#:3 Entry:295 Library:OA\_TMS\_DB5\_67min\_V3.lib

SI:35 Formula:C17H42O5Si4 CAS:58-86-6 MolWeight:438 RetIndex:1784

CompName:Xylose-4TMS(2) ; (2R,3S,4R)-2,3,4,5-tetrahydropentanal

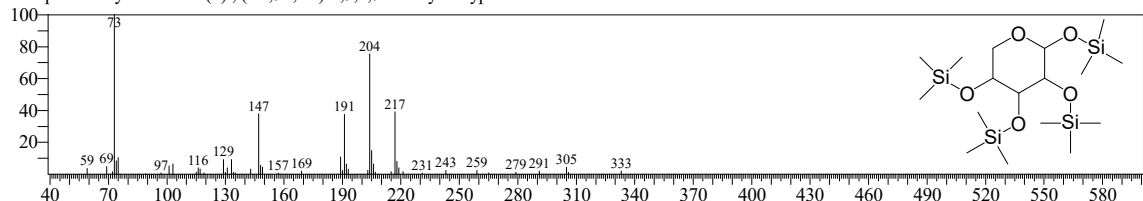

Hit#:4 Entry:238 Library:OA\_TMS\_DB5\_67min\_V3.lib

SI:35 Formula:C17H42O5Si4 CAS:1114-34-7 MolWeight:438 RetIndex:1675

CompName:Lyxose-4TMS(2) ; (2S,3S,4R)-2,3,4,5-tetrahydropentanal

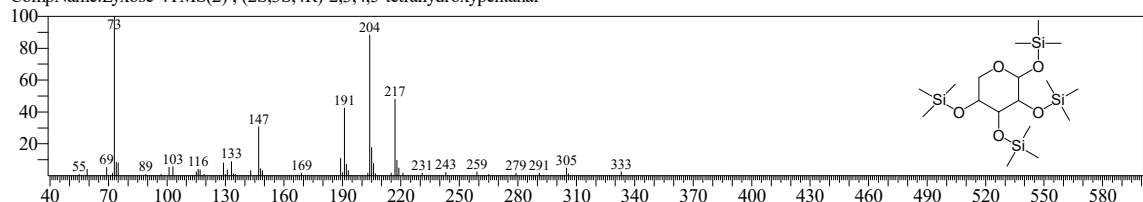

Hit#:5 Entry:523 Library:OA\_TMS\_DB5\_67min\_V3.lib

SI:34 Formula:C18H36N2O6Si3 CAS:58-96-8 MolWeight:460 RetIndex:2483

CompName:Uridine-3TMS ; 1-[(2R,3R,4S,5R)-3,4-dihydroxy-5-(hydroxymethyl)oxolan-2-yl]pyrimidine-2,4-dione

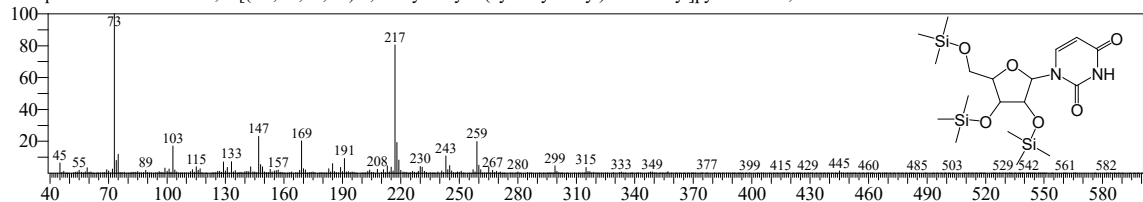



# TNAU

<< Target >>

Line#:8 R.Time:32.480(Scan#:5597) MassPeaks:308

RawMode:Averaged 32.475-32.485(5596-5598) BasePeak:208.00(775)

BG Mode:Calc. from Peak Group 1 - Event 1 Q3 Scan

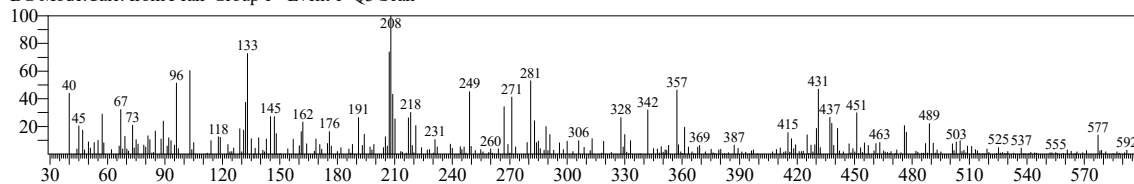

Hit#:1 Entry:561 Library:OA TMS DB5\_67min\_V3.lib

SI:29 Formula:C37H89NO11Si8 CAS:499-40-1 MolWeight:947 RetIndex:2983

CompName:Isomaltose-meto-8TMS(2); (3R,4S,5S,6R)-6-[(2S,3R,4S,5S,6R)-3,4,5-trihydroxy-6-(hydroxymethyl)oxan-2-yl]oxymethyl]oxane-2,3,

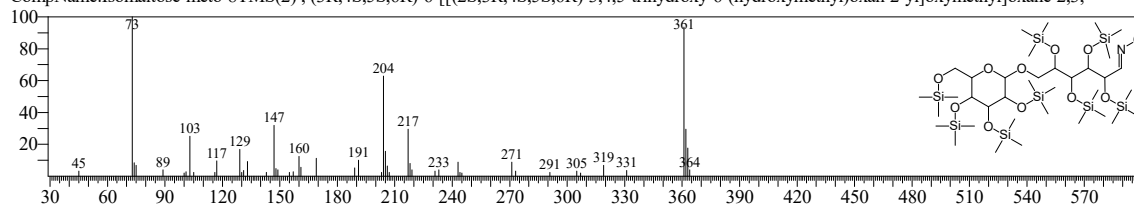

Hit#:2 Entry:171 Library:OA TMS DB5\_67min\_V3.lib

SI:29 Formula:C12H16O2Si CAS:140-10-3 MolWeight:220 RetIndex:1552

CompName:Cinnamic acid-TMS; (E)-3-phenylprop-2-enoic acid

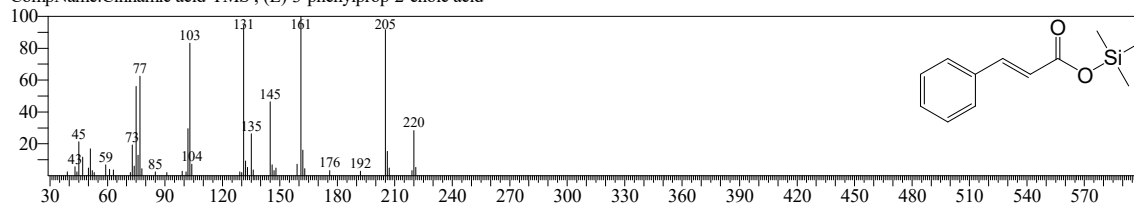

Hit#:3 Entry:541 Library:OA TMS DB5\_67min\_V3.lib

SI:29 Formula:C36H86O11Si8 CAS:57-50-1 MolWeight:918 RetIndex:2705

CompName:Sucrose-8TMS; (2R,3R,4S,5S,6R)-2-[(2S,3S,4S,5R)-3,4-dihydroxy-2,5-bis(hydroxymethyl)oxolan-2-yl]oxy-6-(hydroxymethyl)oxane-3

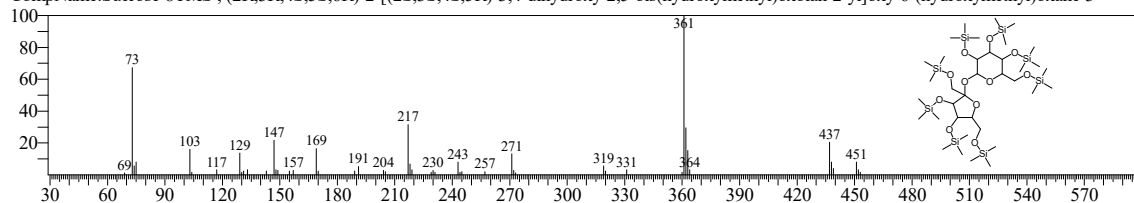

Hit#:4 Entry:559 Library:OA TMS DB5\_67min\_V3.lib

SI:28 Formula:C39H96O11Si9 CAS:585-88-6 MolWeight:992 RetIndex:2923

CompName:Maltitol-9TMS; (2S,3R,4R,5R)-4-[(2R,3R,4S,5S,6R)-3,4,5-trihydroxy-6-(hydroxymethyl)oxan-2-yl]oxyhexane-1,2,3,5,6-pentol

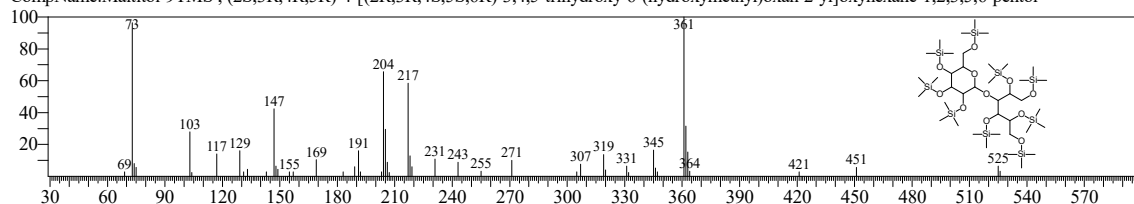

Hit#:5 Entry:268 Library:OA TMS DB5\_67min\_V3.lib

SI:28 Formula:C20H52O5Si5 CAS:87-99-0 MolWeight:512 RetIndex:1732

CompName:Xylitol-5TMS; (2S,4R)-pentane-1,2,3,4,5-pentol

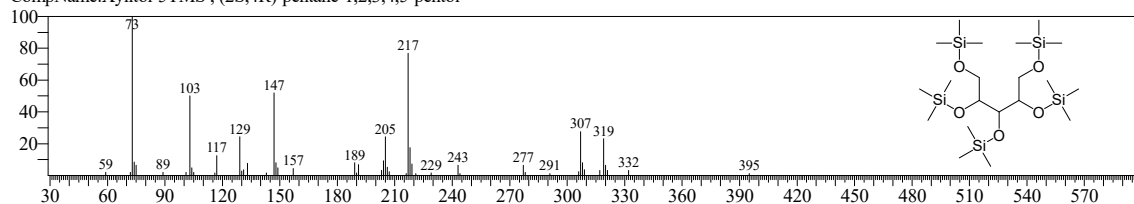

Supplement: Supplementary file 13 [file supplementary]
