# Supplementary material for: Comparative Metabolomics Profiling Reveals Key Metabolites and Associated Pathways Regulating Tuber Dormancy in White Yam (<em>Dioscorea rotundata</em>)
Source: Preprints.org preprint supplement (doi:10.20944/preprints202303.0378.v1), 2023-03-21

# TNAU

## Sample Information

Analyzed by : Admin  
 Analyzed : 01-Sep-22 7:20:09 PM  
 Sample Type : Unknown  
 Level # : 1  
 Sample Name : Sample  
 Sample ID : 1-2  
 IS Amount : [1]=1  
 Sample Amount : 1  
 Dilution Factor : 1  
 Vial # : 2  
 Injection Volume : 2.00  
 Data File : D:\GCMS-8040NX\Sep 2022\Users\01.09.2022\01092022003.qgd  
 Org Data File : D:\GCMS-8040NX\Sep 2022\Users\01.09.2022\01092022003.qgd  
 Method File : D:\GCMS-8040NX\Sep 2022\Method\Scan\_methodfile.qgm  
 Org Method File : D:\GCMS-8040NX\Sep 2022\Method\Scan\_methodfile.qgm  
 Report File :  
 Tuning File : D:\GCMS-8040NX\Aug 2022\Tuning Data\TUNING 25082022.qgt  
 Modified by : Admin  
 Modified : 05-Sep-22 10:55:08 AM

Chromatogram Sample D:\GCMS-8040NX\Sep 2022\Users\01.09.2022\01092022003.qgd

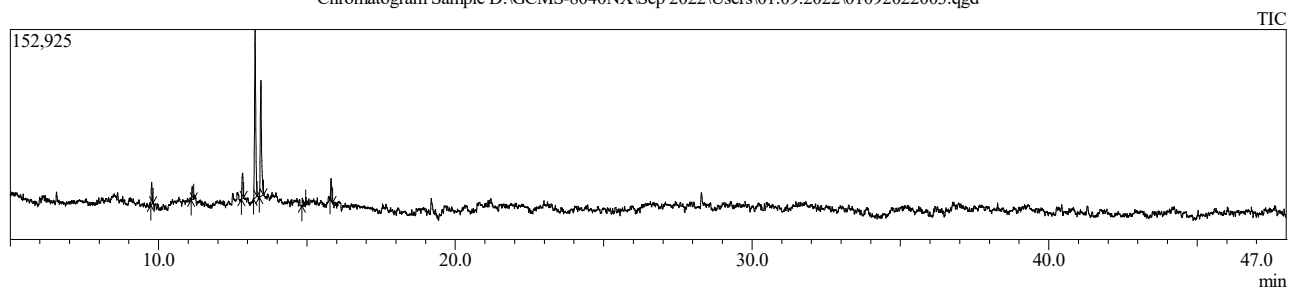

## Peak Report TIC

| Peak# | R.Time | Area   | Area%  | Height | Height% | A/H  | Similarity | Name                           |
|-------|--------|--------|--------|--------|---------|------|------------|--------------------------------|
| 1     | 9.768  | 33941  | 4.52   | 15671  | 5.76    | 2.17 | 93         | Pentasiloxane, dodecamethyl-   |
| 2     | 11.139 | 23882  | 3.18   | 9697   | 3.57    | 2.46 | 59         | Decanoic acid-TMS              |
| 3     | 12.828 | 44478  | 5.92   | 18393  | 6.77    | 2.42 | 34         | Methyl linoleate               |
| 4     | 13.253 | 345575 | 46.01  | 122546 | 45.08   | 2.82 | 54         | Methyl cis-13,16-Docosadienate |
| 5     | 13.448 | 256188 | 34.11  | 84440  | 31.06   | 3.03 | 54         | Methyl cis-13,16-Docosadienate |
| 6     | 14.845 | 9634   | 1.28   | 5207   | 1.92    | 1.85 | 19         | Docosapentaenoic acid-TMS      |
| 7     | 15.815 | 37318  | 4.97   | 15877  | 5.84    | 2.35 | 78         | Malic acid 1-ethyl ester, 2TMS |
|       |        | 751016 | 100.00 | 271831 | 100.00  |      |            |                                |

Library

# TNAU

<< Target >>

Line#:1 R.Time:9.770(Scan#:955) MassPeaks:322

RawMode:Averaged 9.765-9.775(954-956) BasePeak:281.05(3679)

BG Mode:Calc. from Peak Group 1 - Event 1 Q3 Scan

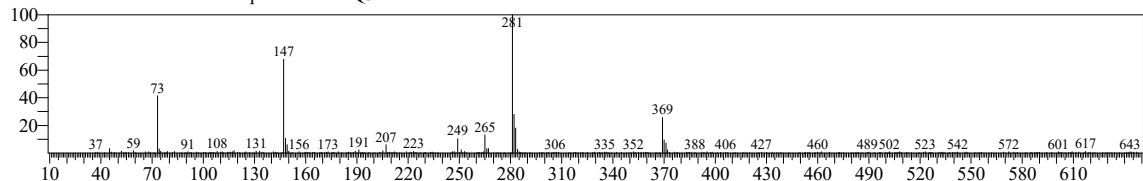

Hit#:1 Entry:40975 Library:NIST20R.lib

SI:93 Formula:C<sub>12</sub>H<sub>36</sub>O<sub>4</sub>Si<sub>5</sub> CAS:141-63-9 MolWeight:384 RetIndex:1068

CompName:Pentasiloxane, dodecamethyl- \$\$ Dodecamethylpentasiloxane \$\$ 1,1,1,3,3,5,5,7,7,9,9-Dodecamethylpentasiloxane #

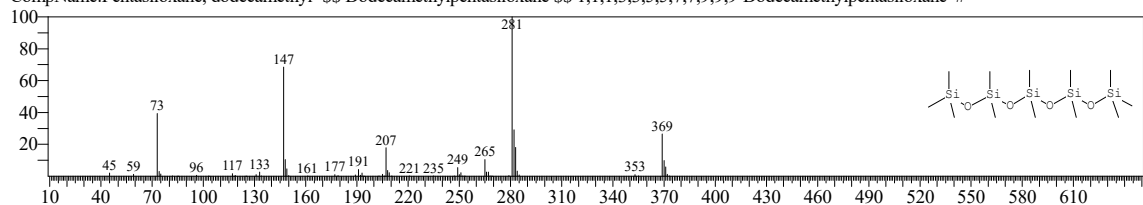

Hit#:2 Entry:249272 Library:NIST20M1.lib

SI:82 Formula:C<sub>12</sub>H<sub>36</sub>O<sub>4</sub>Si<sub>5</sub> CAS:3555-47-3 MolWeight:384 RetIndex:1068

CompName:Trisiloxane, 1,1,1,5,5,5-hexamethyl-3,3-bis[(trimethylsilyl)oxy]- \$\$ Tetrakis(trimethylsiloxy)silane \$\$ Trisiloxane, 1,1,1,5,5,5-hexamethyl-3,3-b

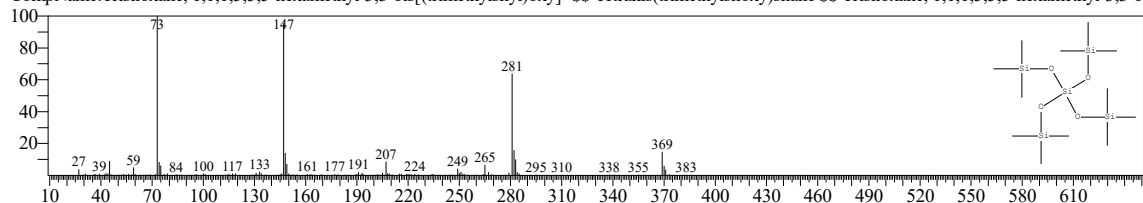

Hit#:3 Entry:27848 Library:NIST20M2.lib

SI:79 Formula:C<sub>18</sub>H<sub>48</sub>O<sub>4</sub>Si<sub>5</sub> CAS:0-00-0 MolWeight:468 RetIndex:1495

CompName:1,3,5,7,9-Pentasiloxane, 1,1,3,3,5,5,7,7,9,9-decamethyl-1,9-di(tert.butyl)-

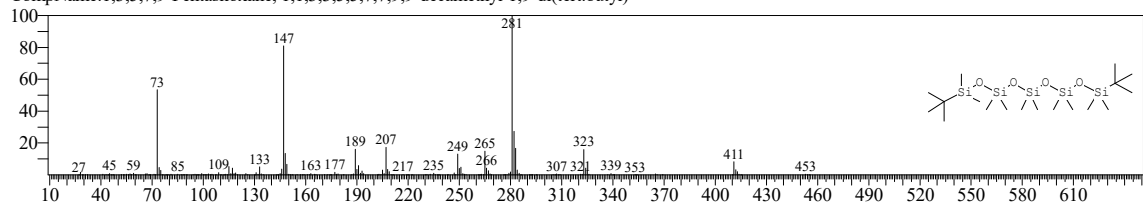

Hit#:4 Entry:249271 Library:NIST20M1.lib

SI:77 Formula:C<sub>12</sub>H<sub>36</sub>O<sub>4</sub>Si<sub>5</sub> CAS:38146-99-5 MolWeight:384 RetIndex:1068

CompName:1,1,1,3,5,5,7,7,7-Nonamethyl-3-(trimethylsiloxy)tetrasiloxane \$\$ 1,1,1,3,3,5,5,7,7,7-Nonamethyl-5-[(trimethylsilyl)oxy]tetrasiloxane #

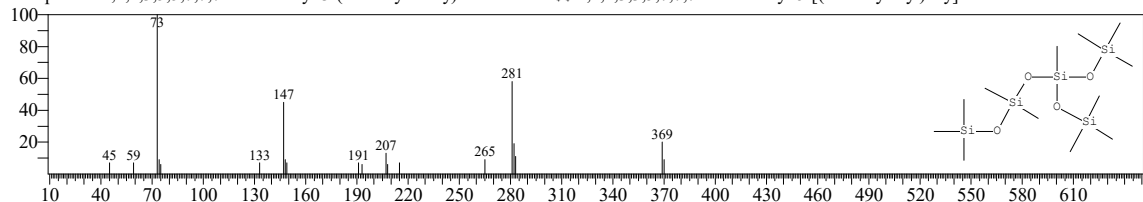

Hit#:5 Entry:158097 Library:NIST20M1.lib

SI:74 Formula:C<sub>14</sub>H<sub>24</sub>O<sub>3</sub>Si<sub>2</sub> CAS:0-00-0 MolWeight:296 RetIndex:1625

CompName:2,6-Dihydroxyacetophenone, 2TMS derivative \$\$ 2',6'-Dihydroxyacetophenone, bis(trimethylsilyl) ether

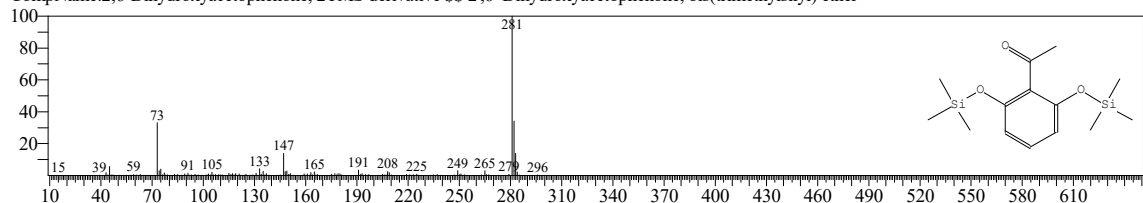

# TNAU

<< Target >>

Line#:2 R.Time:11.140(Scan#:1229) MassPeaks:337

RawMode:Averaged 11.135-11.145(1228-1230) BasePeak:75.05(1241)

BG Mode:Calc. from Peak Group 1 - Event 1 Q3 Scan

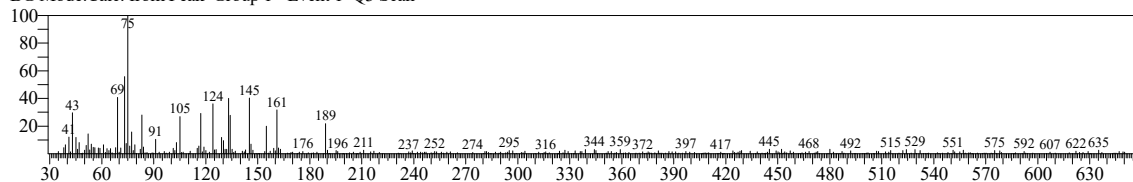

Hit#:1 Entry:129 Library:OA\_TMS\_DB5\_67min\_V3.lib

SI:59 Formula:C<sub>13</sub>H<sub>28</sub>O<sub>2</sub>Si CAS:334-48-5 MolWeight:244 RetIndex:1457

CompName:Decanoic acid-TMS ; decanoic acid

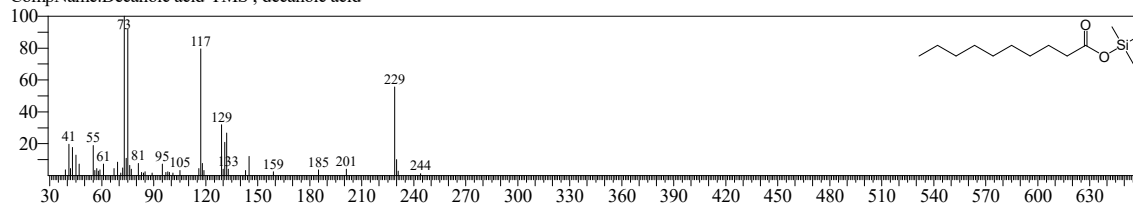

Hit#:2 Entry:331 Library:OA\_TMS\_DB5\_67min\_V3.lib

SI:58 Formula:C<sub>17</sub>H<sub>36</sub>O<sub>2</sub>Si CAS:544-63-8 MolWeight:300 RetIndex:1850

CompName:Myristic acid-TMS ; tetradecanoic acid

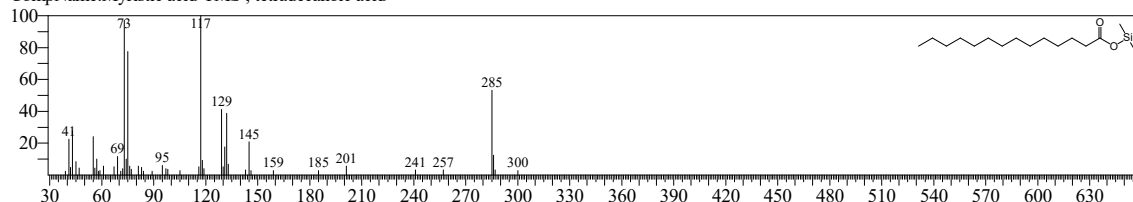

Hit#:3 Entry:70 Library:OA\_TMS\_DB5\_67min\_V3.lib

SI:58 Formula:C<sub>11</sub>H<sub>24</sub>O<sub>2</sub>Si CAS:124-07-2 MolWeight:216 RetIndex:1263

CompName:Octanoic acid-TMS ; octanoic acid

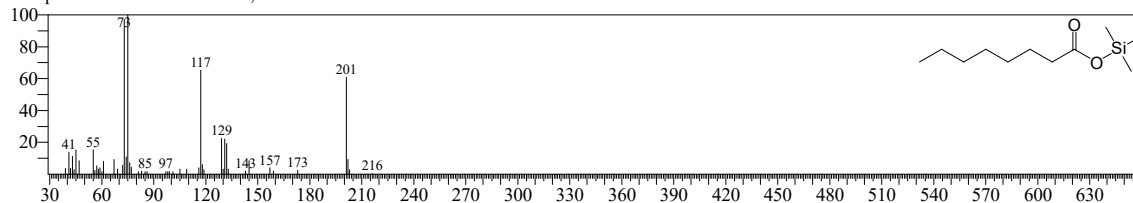

Hit#:4 Entry:11 Library:OA\_TMS\_DB5\_67min\_V3.lib

SI:57 Formula:C<sub>9</sub>H<sub>20</sub>O<sub>2</sub>Si CAS:142-62-1 MolWeight:188 RetIndex:1071

CompName:Caproic acid-TMS ; hexanoic acid

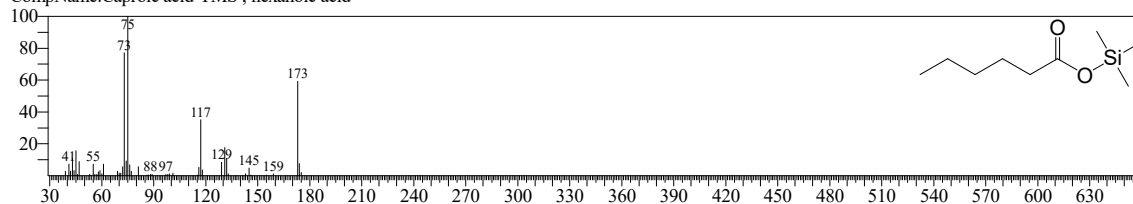

Hit#:5 Entry:106 Library:OA\_TMS\_DB5\_67min\_V3.lib

SI:57 Formula:C<sub>9</sub>H<sub>18</sub>O<sub>3</sub>Si CAS:503-48-0 MolWeight:202 RetIndex:1378

CompName:Mevalonic lactone-TMS ; 4-hydroxy-4-methyloxan-2-one

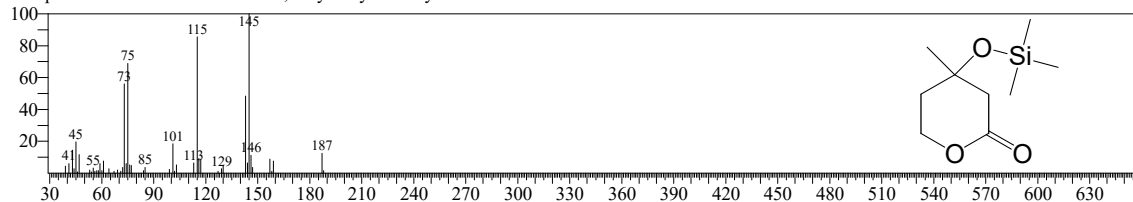

# TNAU

<< Target >>

Line#3 R.Time:12.830(Scan#:1567) MassPeaks:368

RawMode:Averaged 12.825-12.835(1566-1568) BasePeak:138.10(5717)

BG Mode:Calc. from Peak Group 1 - Event 1 Q3 Scan

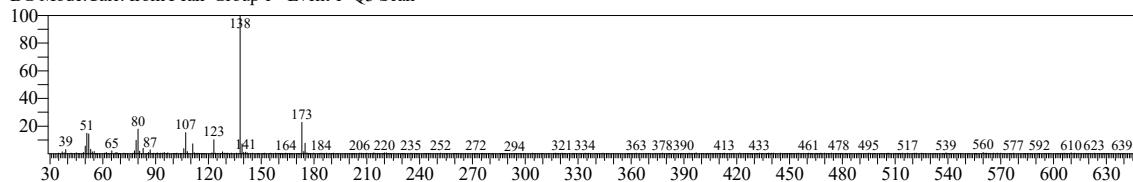

Hit#1 Entry:21 Library:FA\_ME\_SP2560\_EI\_V3.lib

SI:34 Formula:C19H34O2 CAS:60-33-3 MolWeight:294 RetIndex:2775

CompName:Methyl linoleate ; Octadeca-9,12-dienoic acid

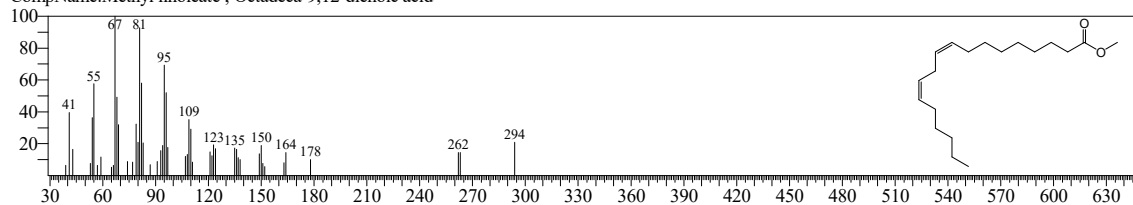

Hit#2 Entry:34 Library:FA\_ME\_SP2560\_EI\_V3.lib

SI:34 Formula:C23H42O2 CAS:7370-49-2 MolWeight:350 RetIndex:3169

CompName:Methyl cis-13,16-Docosadienate ; (13Z,16E)-docosa-13,16-dienoic acid

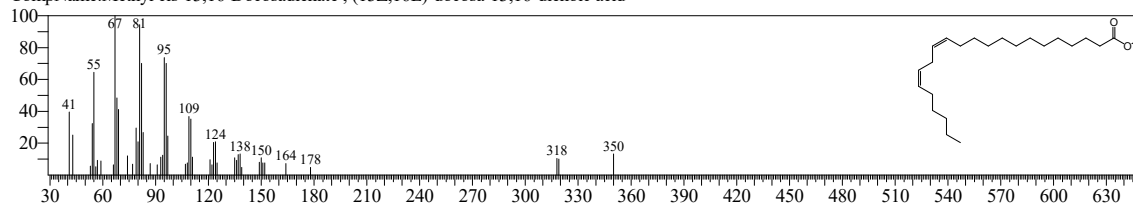

Hit#3 Entry:25 Library:FA\_ME\_SP2560\_EI\_V3.lib

SI:34 Formula:C19H32O2 CAS:463-40-1 MolWeight:292 RetIndex:2892

CompName:Methyl linolenate ; (9Z,12Z,15Z)-octadeca-9,12,15-trienoic acid

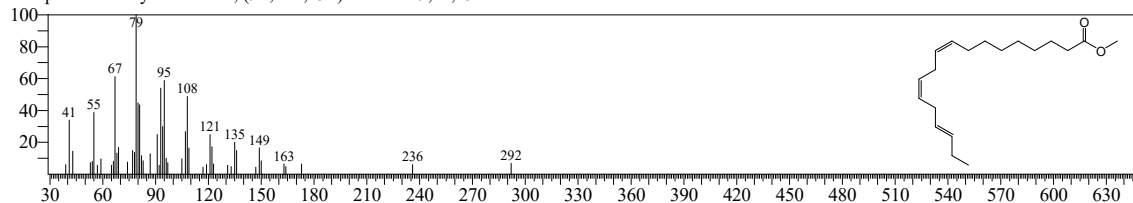

Hit#4 Entry:20 Library:FA\_ME\_SP2560\_EI\_V3.lib

SI:34 Formula:C19H34O2 CAS:506-21-8 MolWeight:294 RetIndex:2727

CompName:Methyl linolelaidate ; (9E,12E)-octadeca-9,12-dienoic acid

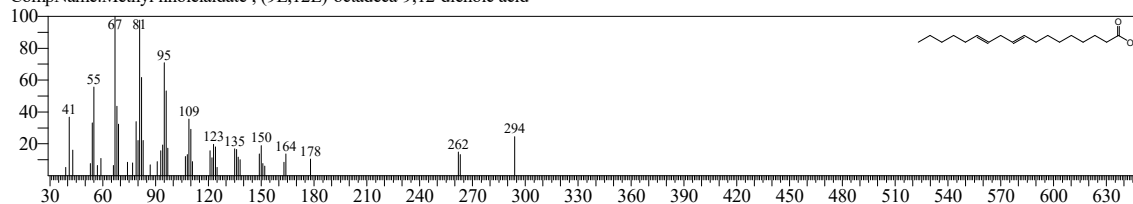

Hit#5 Entry:27 Library:FA\_ME\_SP2560\_EI\_V3.lib

SI:33 Formula:C21H38O2 CAS:2091-39-6 MolWeight:322 RetIndex:2973

CompName:Methyl cis-11,14-Icosadienoate ; ; Icosa-11,14-dienoic acid

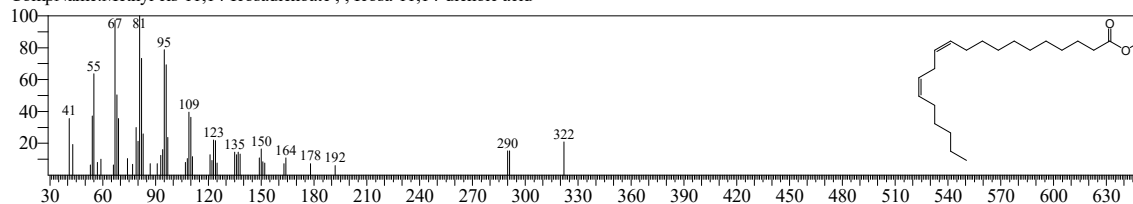

# TNAU

<< Target >>

Line#:4 R.Time:13.255(Scan#:1652) MassPeaks:361

RawMode:Averaged 13.250-13.260(1651-1653) BasePeak:155.05(19445)

BG Mode:Calc. from Peak Group 1 - Event 1 Q3 Scan

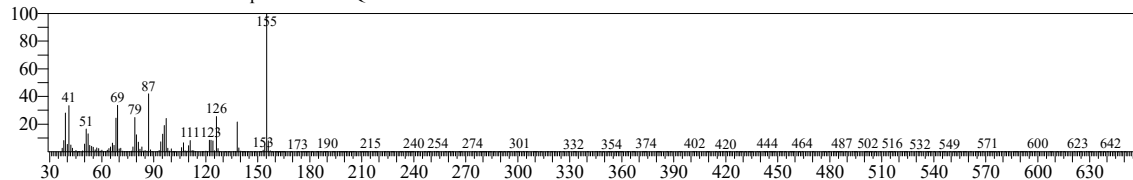

Hit#:1 Entry:34 Library:FA\_ME\_SP2560\_EI\_V3.lib

SI:54 Formula:C23H42O2 CAS:7370-49-2 MolWeight:350 RetIndex:3169

CompName:Methyl cis-13,16-Docosadienate ; (13Z,16E)-docosa-13,16-dienoic acid

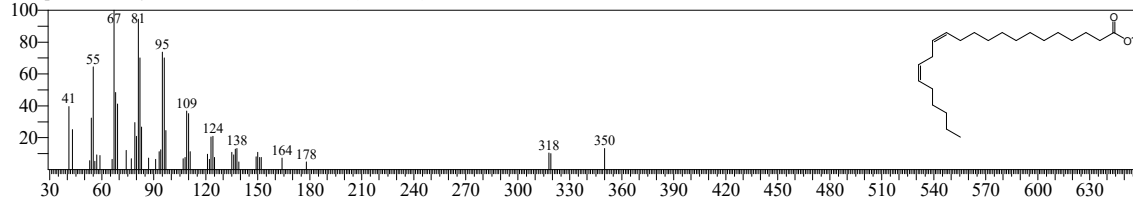

Hit#:2 Entry:21 Library:FA\_ME\_SP2560\_EI\_V3.lib

SI:52 Formula:C19H34O2 CAS:60-33-3 MolWeight:294 RetIndex:2775

CompName:Methyl linoleate ; Octadeca-9,12-dienoic acid

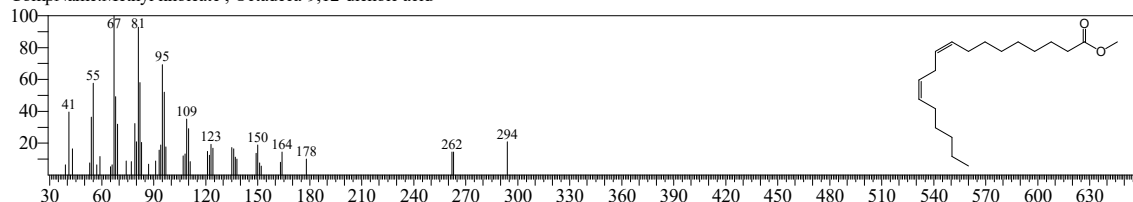

Hit#:3 Entry:20 Library:FA\_ME\_SP2560\_EI\_V3.lib

SI:52 Formula:C19H34O2 CAS:506-21-8 MolWeight:294 RetIndex:2727

CompName:Methyl linolelaidate ; (9E,12E)-octadeca-9,12-dienoic acid

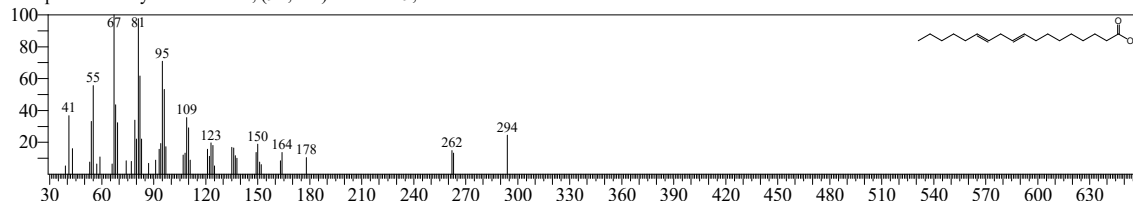

Hit#:4 Entry:27 Library:FA\_ME\_SP2560\_EI\_V3.lib

SI:52 Formula:C21H38O2 CAS:2091-39-6 MolWeight:322 RetIndex:2973

CompName:Methyl cis-11,14-Icosadienoate ; Icosa-11,14-dienoic acid

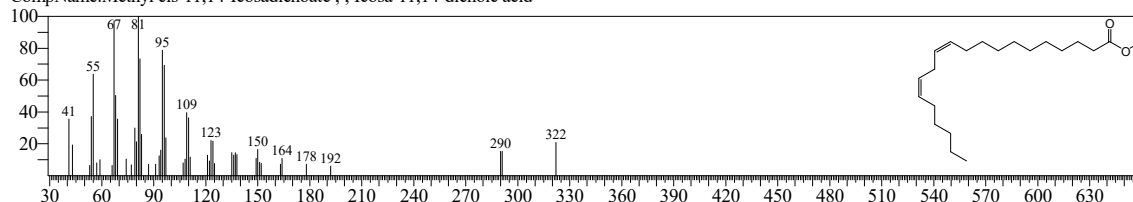

Hit#:5 Entry:11 Library:FA\_ME\_SP2560\_EI\_V3.lib

SI:52 Formula:C16H30O2 CAS:84743-29-3 MolWeight:254 RetIndex:2388

CompName:Methyl cis-10-pentadecenoate ; (Z)-pentadec-10-enoic acid

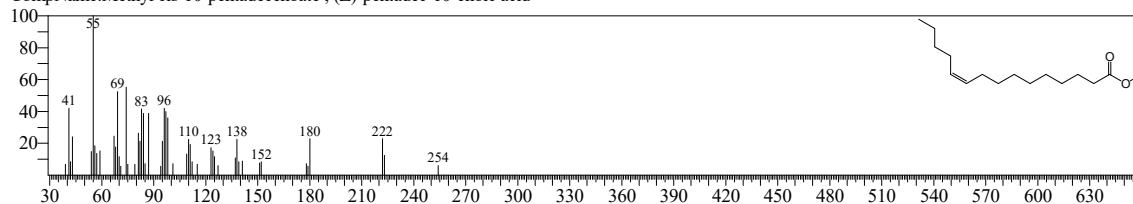

# TNAU

<< Target >>

Line#:5 R.Time:13.450(Scan#:1691) MassPeaks:285

RawMode:Averaged 13.445-13.455(1690-1692) BasePeak:155.10(13749)

BG Mode:Calc. from Peak Group 1 - Event 1 Q3 Scan

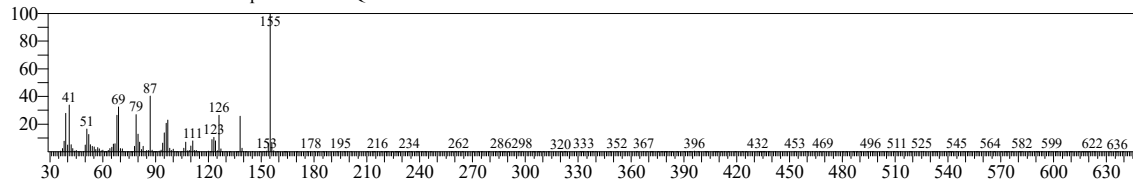

Hit#:1 Entry:34 Library:FA\_ME\_SP2560\_EI\_V3.lib

SI:54 Formula:C23H42O2 CAS:7370-49-2 MolWeight:350 RetIndex:3169

CompName:Methyl cis-13,16-Docosadienate ; (13Z,16E)-docosa-13,16-dienoic acid

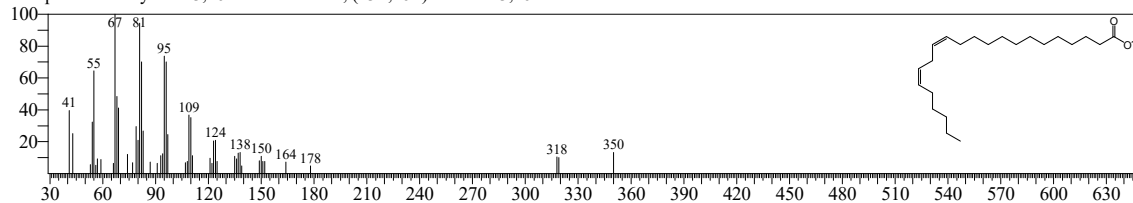

Hit#:2 Entry:21 Library:FA\_ME\_SP2560\_EI\_V3.lib

SI:53 Formula:C19H34O2 CAS:60-33-3 MolWeight:294 RetIndex:2775

CompName:Methyl linoleate ; Octadeca-9,12-dienoic acid

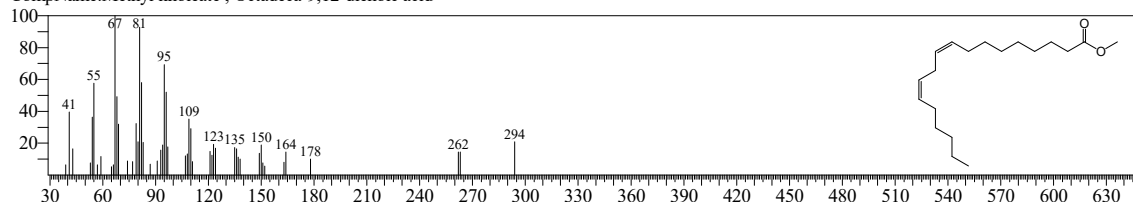

Hit#:3 Entry:20 Library:FA\_ME\_SP2560\_EI\_V3.lib

SI:52 Formula:C19H34O2 CAS:506-21-8 MolWeight:294 RetIndex:2727

CompName:Methyl linolelaidate ; (9E,12E)-octadeca-9,12-dienoic acid

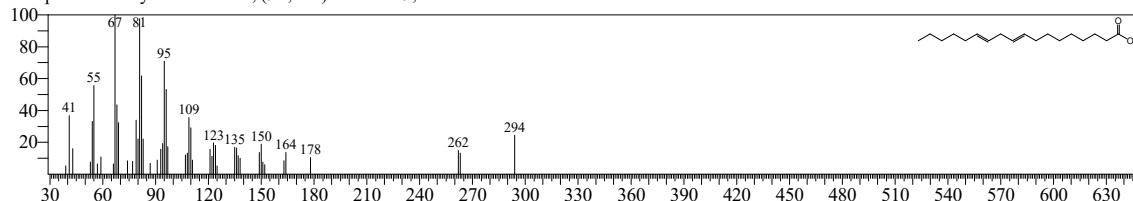

Hit#:4 Entry:27 Library:FA\_ME\_SP2560\_EI\_V3.lib

SI:52 Formula:C21H38O2 CAS:2091-39-6 MolWeight:322 RetIndex:2973

CompName:Methyl cis-11,14-Icosadienoate ; Icosa-11,14-dienoic acid

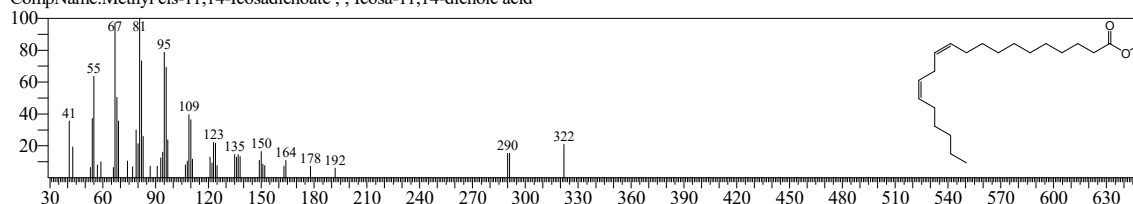

Hit#:5 Entry:11 Library:FA\_ME\_SP2560\_EI\_V3.lib

SI:52 Formula:C16H30O2 CAS:84743-29-3 MolWeight:254 RetIndex:2388

CompName:Methyl cis-10-pentadecenoate ; (Z)-pentadec-10-enoic acid

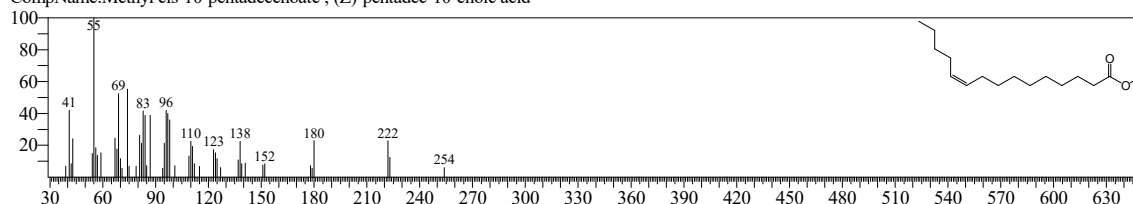

# TNAU

<< Target >>

Line#:6 R.Time:14.845(Scan#:1970) MassPeaks:401

RawMode:Averaged 14.840-14.850(1969-1971) BasePeak:79.00(58)

BG Mode:Calc. from Peak Group 1 - Event 1 Q3 Scan

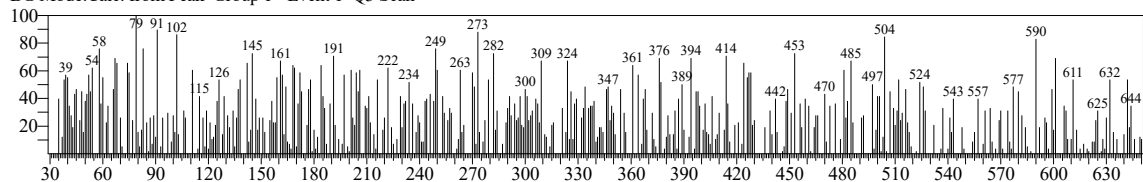

Hit#:1 Entry:534 Library:OA\_TMS\_DB5\_67min\_V3.lib

SI:19 Formula:C25H42O2Si CAS:24880-45-3 MolWeight:402 RetIndex:2591

CompName:Docosapentaenoic acid-TMS ; (7Z,10Z,13Z,16Z,19Z)-docosa-7,10,13,16,19-pentaenoic acid

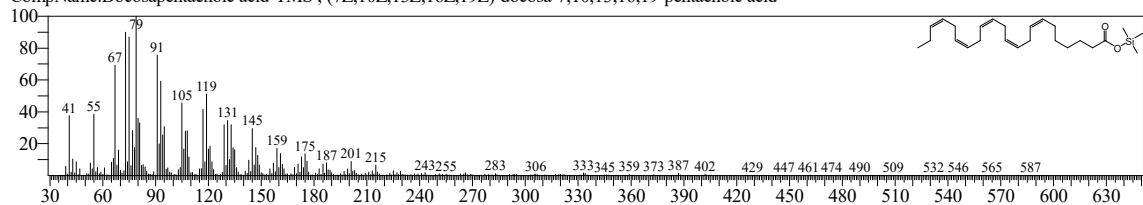

Hit#:2 Entry:509 Library:OA\_TMS\_DB5\_67min\_V3.lib

SI:19 Formula:C23H38O2Si CAS:10417-94-4 MolWeight:374 RetIndex:2389

CompName:Eicosapentaenoic acid-TMS ; icoso-5,8,11,14,17-pentaenoic acid

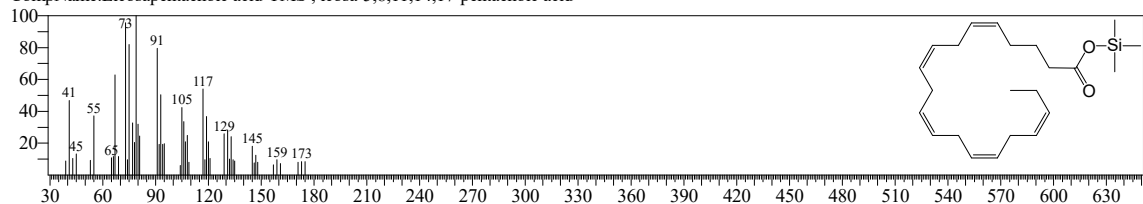

Hit#:3 Entry:171 Library:OA\_TMS\_DB5\_67min\_V3.lib

SI:18 Formula:C12H16O2Si CAS:140-10-3 MolWeight:220 RetIndex:1552

CompName:Cinnamic acid-TMS ; (E)-3-phenylprop-2-enoic acid

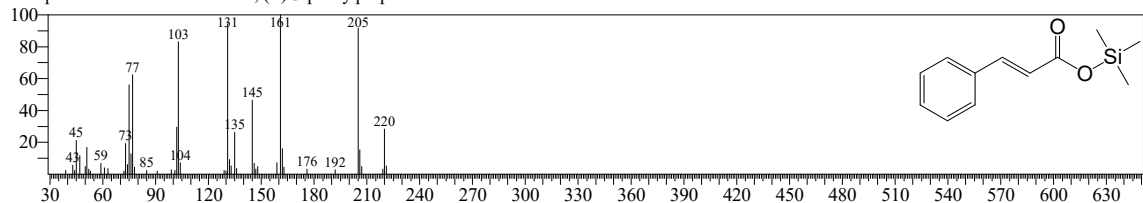

Hit#:4 Entry:537 Library:OA\_TMS\_DB5\_67min\_V3.lib

SI:17 Formula:C26H33NSi CAS:13042-18-7 MolWeight:387 RetIndex:2646

CompName:Fendiline-TMS ; 3,3-diphenyl-N-(1-phenylethyl)propan-1-amine

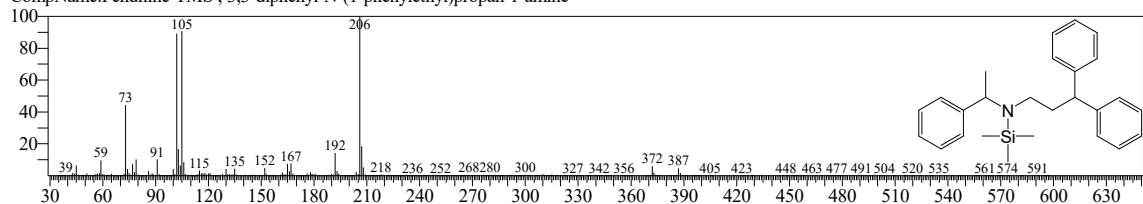

Hit#:5 Entry:21 Library:FA\_ME\_SP2560\_EI\_V3.lib

SI:17 Formula:C19H34O2 CAS:60-33-3 MolWeight:294 RetIndex:2775

CompName:Methyl linoleate ; Octadeca-9,12-dienoic acid

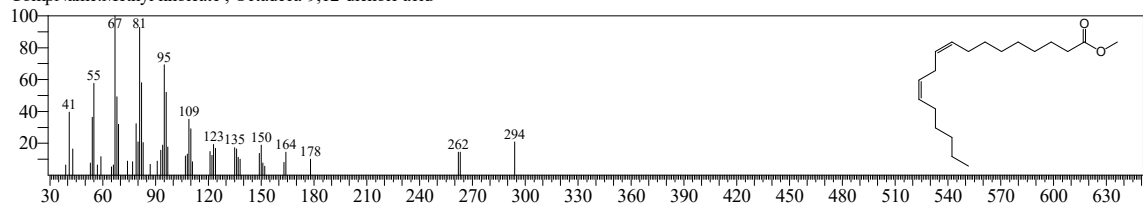

# TNAU

<< Target >>

Line#:7 R.Time:15.815(Scan#:2164) MassPeaks:308

RawMode:Averaged 15.810-15.820(2163-2165) BasePeak:73.05(2412)

BG Mode:Calc. from Peak Group 1 - Event 1 Q3 Scan

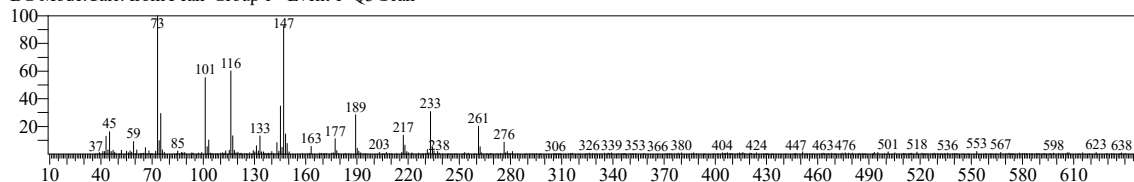

Hit#:1 Entry:169946 Library:NIST20M1.lib

SI:78 Formula:C<sub>12</sub>H<sub>26</sub>O<sub>5</sub>Si<sub>2</sub> CAS:0-00-0 MolWeight:306 RetIndex:1380

CompName:Malic acid 1-ethyl ester, 2TMS \$ 1-Ethyl 4-(trimethylsilyl) 2-((trimethylsilyl)oxy)succinate \$ (./-.)-1-Ethyl hydroxybutanedioate, 2TMS \$ 1

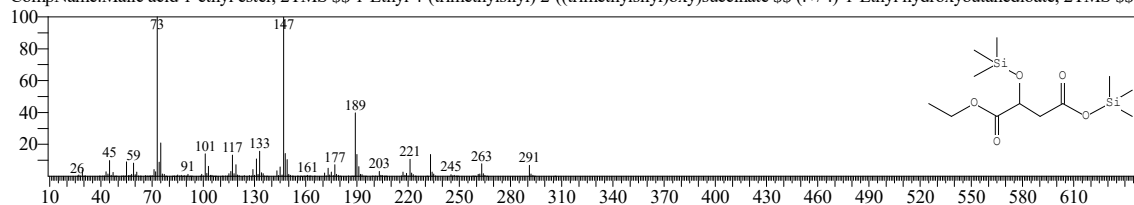

Hit#:2 Entry:33630 Library:NIST20R.lib

SI:75 Formula:C<sub>12</sub>H<sub>28</sub>O<sub>3</sub>Si<sub>2</sub> CAS:136788-82-4 MolWeight:276 RetIndex:1213

CompName:Hexanoic acid, 3-trimethylsilyloxy, trimethylsilyl ester \$ Trimethylsilyl 3-[(trimethylsilyl)oxy]hexanoate \$ 3-Trimethylsiloxy(trimethylsilyl)ca

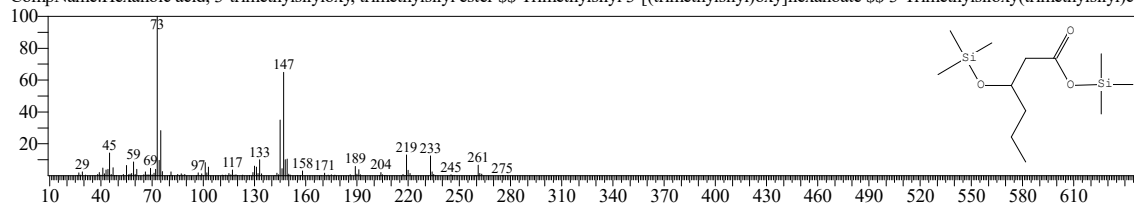

Hit#:3 Entry:117877 Library:NIST20M1.lib

SI:75 Formula:C<sub>10</sub>H<sub>22</sub>O<sub>4</sub>Si<sub>2</sub> CAS:0-00-0 MolWeight:262 RetIndex:1317

CompName:Erythrono-1,4-lactone, 2TMS derivative \$ D-Erythronic acid .gamma.-lactone, bis(trimethylsilyl) ether

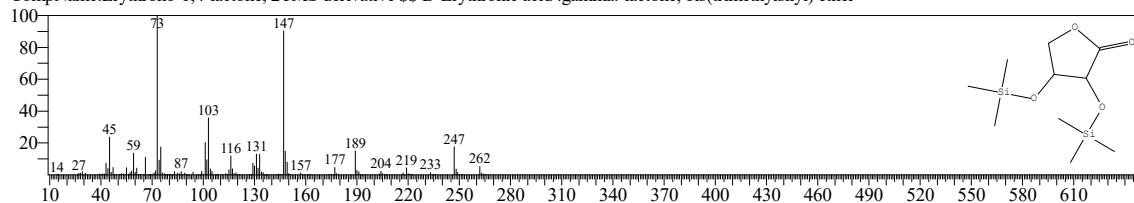

Hit#:4 Entry:219755 Library:NIST20M1.lib

SI:75 Formula:C<sub>14</sub>H<sub>34</sub>O<sub>4</sub>Si<sub>3</sub> CAS:0-00-0 MolWeight:350 RetIndex:1446

CompName:Deoxyribose, tris(trimethylsilyl) ether (isomer 2)

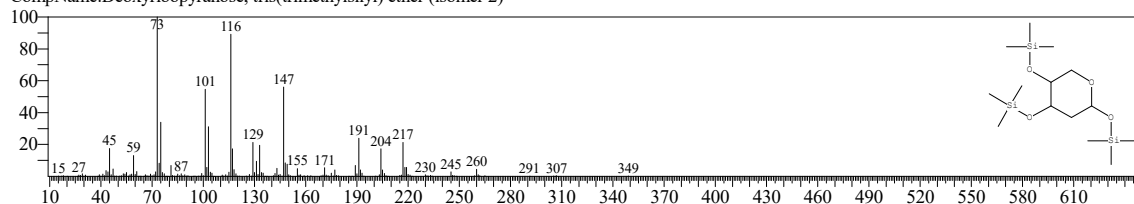

Hit#:5 Entry:219752 Library:NIST20M1.lib

SI:75 Formula:C<sub>14</sub>H<sub>34</sub>O<sub>4</sub>Si<sub>3</sub> CAS:33648-76-9 MolWeight:350 RetIndex:1431

CompName:D-2-Deoxyribose, 3TMS derivative \$ 2-Deoxy ribose O,O',O"-tris(trimethylsilyl)- \$ 2-Deoxy-3,4,5-tris-O-(trimethylsilyl)pentose #

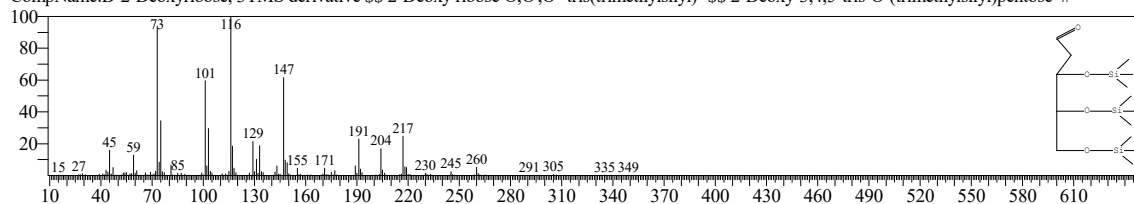

Supplement: Supplementary file 25 [file supplementary]
