# Supplementary material for: Comparative Metabolomics Profiling Reveals Key Metabolites and Associated Pathways Regulating Tuber Dormancy in White Yam (<em>Dioscorea rotundata</em>)
Source: Preprints.org preprint supplement (doi:10.20944/preprints202303.0378.v1), 2023-03-21

# TNAU

## Sample Information

Analyzed by : Admin  
 Analyzed : 02-Sep-22 6:45:45 AM  
 Sample Type : Unknown  
 Level # : 1  
 Sample Name : Sample  
 Sample ID : 5-3  
 IS Amount : [1]=1  
 Sample Amount : 1  
 Dilution Factor : 1  
 Vial # : 6  
 Injection Volume : 2.00  
 Data File : D:\GCMS-8040NX\Sep 2022\Users\01.09.2022\01092022016.qgd  
 Org Data File : D:\GCMS-8040NX\Sep 2022\Users\01.09.2022\01092022016.qgd  
 Method File : D:\GCMS-8040NX\Sep 2022\Method\Scan\_methodfile.qgm  
 Org Method File : D:\GCMS-8040NX\Sep 2022\Method\Scan\_methodfile.qgm  
 Report File :  
 Tuning File : D:\GCMS-8040NX\Aug 2022\Tuning Data\TUNING 25082022.qgt  
 Modified by : Admin  
 Modified : 05-Sep-22 11:02:55 AM

Chromatogram Sample D:\GCMS-8040NX\Sep 2022\Users\01.09.2022\01092022016.qgd

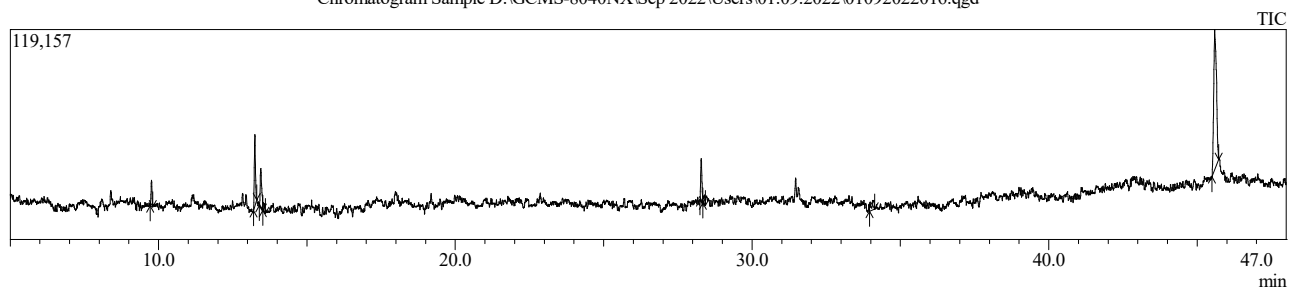

Peak Report TIC

| Peak# | R.Time | Area   | Area%  | Height | Height% | A/H  | Similarity | Name                           |
|-------|--------|--------|--------|--------|---------|------|------------|--------------------------------|
| 1     | 9.764  | 34611  | 3.96   | 14771  | 7.55    | 2.34 | 93         | Pentasiloxane, dodecamethyl-   |
| 2     | 13.245 | 112155 | 12.83  | 40637  | 20.78   | 2.76 | 54         | Methyl cis-13,16-Docosadienate |
| 3     | 13.444 | 79623  | 9.11   | 22131  | 11.32   | 3.60 | 54         | Methyl cis-13,16-Docosadienate |
| 4     | 13.575 | 16229  | 1.86   | 4894   | 2.50    | 3.32 | 21         | 2-Octenoic acid-TMS            |
| 5     | 28.287 | 68015  | 7.78   | 24220  | 12.38   | 2.81 | 94         | n-Hexadecanoic acid            |
| 6     | 28.410 | 17980  | 2.06   | 4132   | 2.11    | 4.35 | 21         | S-Benzyl-Cysteine-4TMS         |
| 7     | 34.063 | 36023  | 4.12   | 5418   | 2.77    | 6.65 | 13         | 4-Cresol-TMS                   |
| 8     | 45.592 | 509471 | 58.28  | 79360  | 40.58   | 6.42 | 90         | Diosgenin                      |
|       |        | 874107 | 100.00 | 195563 | 100.00  |      |            |                                |

Library

# TNAU

<< Target >>

Line#:1 R.Time:9.765(Scan#:954) MassPeaks:349

RawMode:Averaged 9.760-9.770(953-955) BasePeak:281.05(3501)

BG Mode:Calc. from Peak Group 1 - Event 1 Q3 Scan

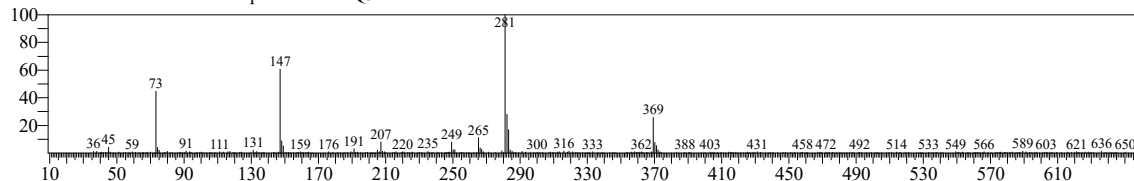

Hit#:1 Entry:40975 Library:NIST20R.lib

SI:93 Formula:C<sub>12</sub>H<sub>36</sub>O<sub>4</sub>Si<sub>5</sub> CAS:141-63-9 MolWeight:384 RetIndex:1068

CompName:Pentasiloxane, dodecamethyl- \$\$ Dodecamethylpentasiloxane \$\$ 1,1,1,3,3,5,5,7,7,9,9-Dodecamethylpentasiloxane #

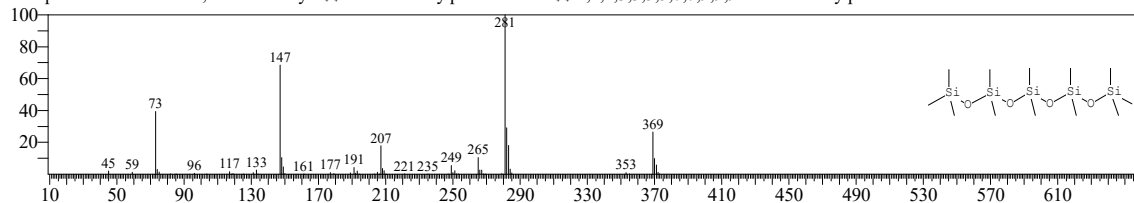

Hit#:2 Entry:249272 Library:NIST20M1.lib

SI:82 Formula:C<sub>12</sub>H<sub>36</sub>O<sub>4</sub>Si<sub>5</sub> CAS:3555-47-3 MolWeight:384 RetIndex:1068

CompName:Trisiloxane, 1,1,1,5,5,5-hexamethyl-3,3-bis[(trimethylsilyl)oxy]- \$\$ Tetrakis(trimethylsiloxy)silane \$\$ Trisiloxane, 1,1,1,5,5,5-hexamethyl-3,3-b

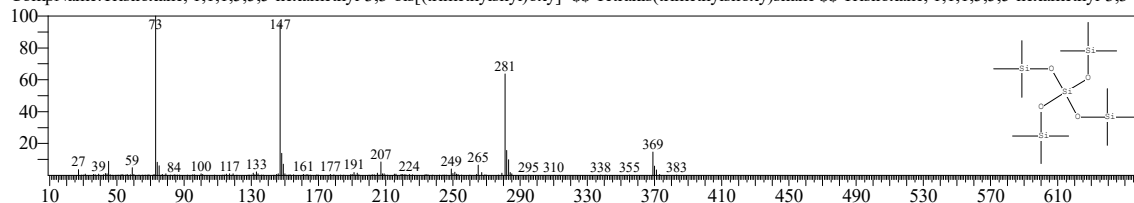

Hit#:3 Entry:27848 Library:NIST20M2.lib

SI:79 Formula:C<sub>18</sub>H<sub>48</sub>O<sub>4</sub>Si<sub>5</sub> CAS:0-00-0 MolWeight:468 RetIndex:1495

CompName:1,3,5,7,9-Pentasiloxane, 1,1,3,3,5,5,7,7,9,9-decamethyl-1,9-di(tert.butyl)-

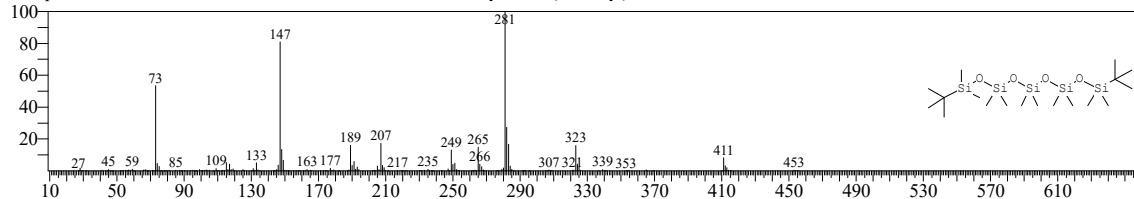

Hit#:4 Entry:249271 Library:NIST20M1.lib

SI:78 Formula:C<sub>12</sub>H<sub>36</sub>O<sub>4</sub>Si<sub>5</sub> CAS:38146-99-5 MolWeight:384 RetIndex:1068

CompName:1,1,1,3,5,5,7,7,9-Nonamethyl-3-(trimethylsiloxy)tetrasiloxane \$\$ 1,1,1,3,3,5,5,7,7-Nonamethyl-5-[(trimethylsilyl)oxy]tetrasiloxane #

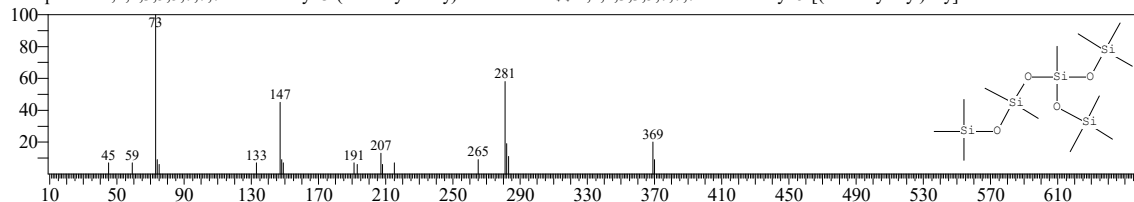

Hit#:5 Entry:158097 Library:NIST20M1.lib

SI:76 Formula:C<sub>14</sub>H<sub>24</sub>O<sub>3</sub>Si<sub>2</sub> CAS:0-00-0 MolWeight:296 RetIndex:1625

CompName:2,6-Dihydroxyacetophenone, 2TMS derivative \$\$ 2',6'-Dihydroxyacetophenone, bis(trimethylsilyl) ether

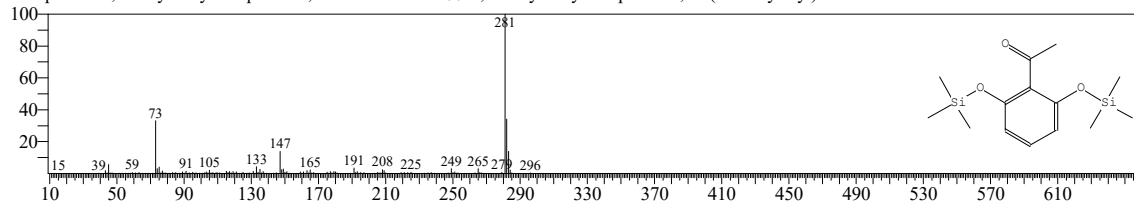

# TNAU

<< Target >>

Line#:2 R.Time:13.245(Scan#:1650) MassPeaks:340

RawMode:Averaged 13.240-13.250(1649-1651) BasePeak:155.10(6267)

BG Mode:Calc. from Peak Group 1 - Event 1 Q3 Scan

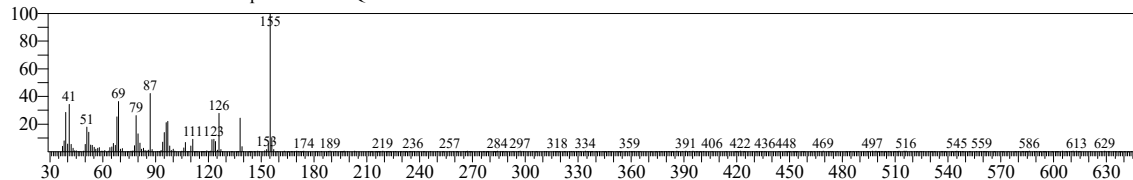

Hit#:1 Entry:34 Library:FA\_ME\_SP2560\_EI\_V3.lib

SI:54 Formula:C23H42O2 CAS:7370-49-2 MolWeight:350 RetIndex:3169

CompName:Methyl cis-13,16-Docosadienate ; (13Z,16E)-docosa-13,16-dienoic acid

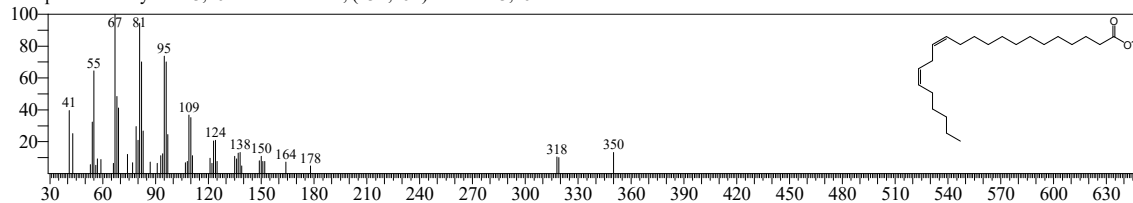

Hit#:2 Entry:21 Library:FA\_ME\_SP2560\_EI\_V3.lib

SI:52 Formula:C19H34O2 CAS:60-33-3 MolWeight:294 RetIndex:2775

CompName:Methyl linoleate ; Octadeca-9,12-dienoic acid

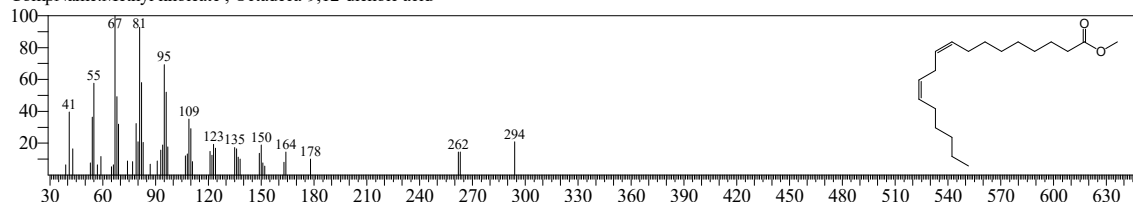

Hit#:3 Entry:11 Library:FA\_ME\_SP2560\_EI\_V3.lib

SI:52 Formula:C16H30O2 CAS:84743-29-3 MolWeight:254 RetIndex:2388

CompName:Methyl cis-10-pentadecenoate ; (Z)-pentadec-10-enoic acid

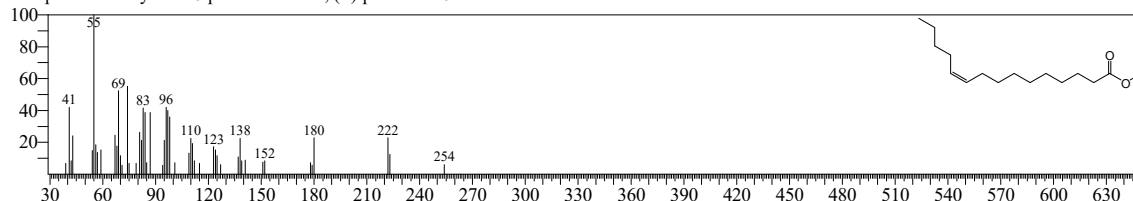

Hit#:4 Entry:20 Library:FA\_ME\_SP2560\_EI\_V3.lib

SI:52 Formula:C19H34O2 CAS:506-21-8 MolWeight:294 RetIndex:2727

CompName:Methyl linolelaidate ; (9E,12E)-octadeca-9,12-dienoic acid

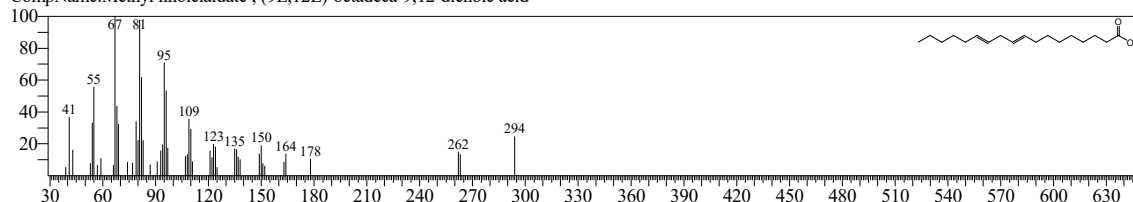

Hit#:5 Entry:27 Library:FA\_ME\_SP2560\_EI\_V3.lib

SI:52 Formula:C21H38O2 CAS:2091-39-6 MolWeight:322 RetIndex:2973

CompName:Methyl cis-11,14-Icosadienoate ; ; Icosa-11,14-dienoic acid

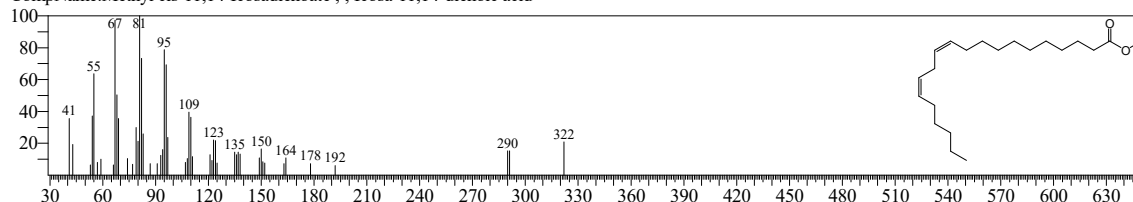

# TNAU

<< Target >>

Line#3 R.Time:13.445(Scan#:1690) MassPeaks:239

RawMode:Averaged 13.440-13.450(1689-1691) BasePeak:155.05(3710)

BG Mode:Calc. from Peak Group 1 - Event 1 Q3 Scan

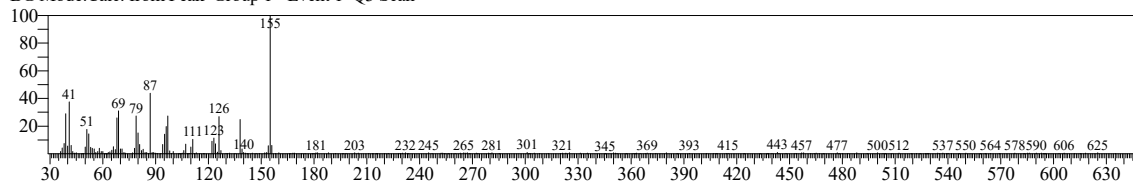

Hit#1 Entry:34 Library:FA\_ME\_SP2560\_EI\_V3.lib

SI:54 Formula:C23H42O2 CAS:7370-49-2 MolWeight:350 RetIndex:3169

CompName:Methyl cis-13,16-Docosadienate ; (13Z,16E)-docosa-13,16-dienoic acid



Hit#2 Entry:21 Library:FA\_ME\_SP2560\_EI\_V3.lib

SI:53 Formula:C19H34O2 CAS:60-33-3 MolWeight:294 RetIndex:2775

CompName:Methyl linoleate ; Octadeca-9,12-dienoic acid



Hit#3 Entry:20 Library:FA\_ME\_SP2560\_EI\_V3.lib

SI:52 Formula:C19H34O2 CAS:506-21-8 MolWeight:294 RetIndex:2727

CompName:Methyl linolelaidate ; (9E,12E)-octadeca-9,12-dienoic acid

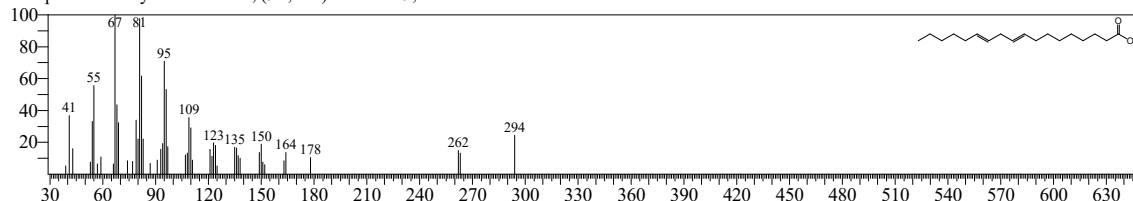

Hit#4 Entry:11 Library:FA\_ME\_SP2560\_EI\_V3.lib

SI:52 Formula:C16H30O2 CAS:84743-29-3 MolWeight:254 RetIndex:2388

CompName:Methyl cis-10-pentadecenoate ; (Z)-pentadec-10-enoic acid

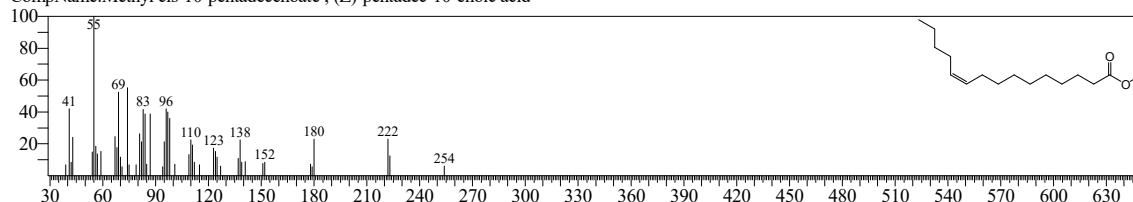

Hit#5 Entry:27 Library:FA\_ME\_SP2560\_EI\_V3.lib

SI:52 Formula:C21H38O2 CAS:2091-39-6 MolWeight:322 RetIndex:2973

CompName:Methyl cis-11,14-Icosadienoate ; ; Icosa-11,14-dienoic acid

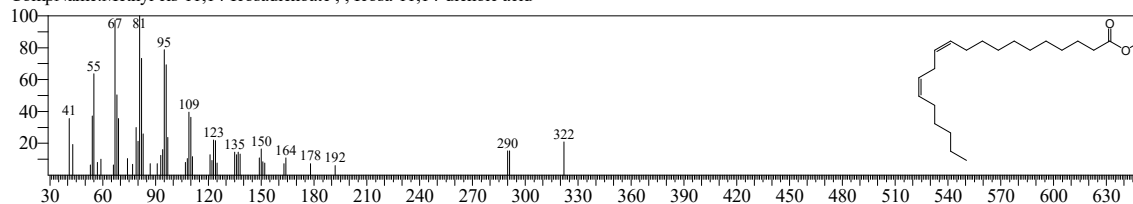

# TNAU

<< Target >>

Line#:4 R.Time:13.575(Scan#:1716) MassPeaks:373

RawMode:Averaged 13.570-13.580(1715-1717) BasePeak:36.00(82)

BG Mode:Calc. from Peak Group 1 - Event 1 Q3 Scan

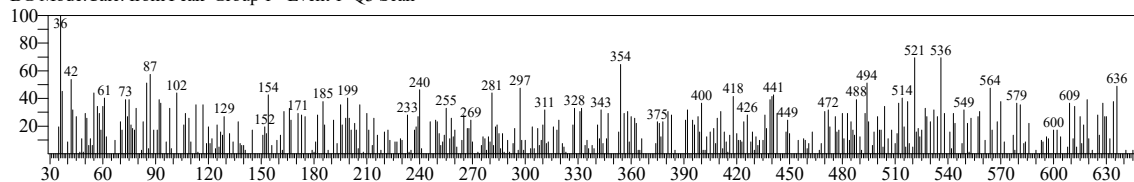

Hit#:1 Entry:91 Library:OA\_TMS\_DB5\_67min\_V3.lib

SI:21 Formula:C<sub>11</sub>H<sub>22</sub>O<sub>2</sub>Si CAS:1871-67-6 MolWeight:214 RetIndex:1313

CompName:2-Octenoic acid-TMS; (E)-oct-2-enoic acid

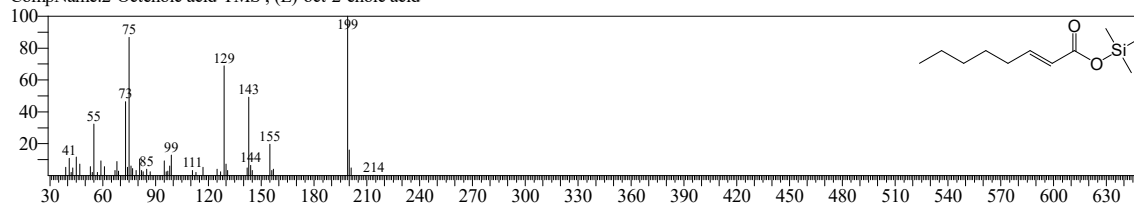

Hit#:2 Entry:485 Library:OA\_TMS\_DB5\_67min\_V3.lib

SI:20 Formula:C<sub>21</sub>H<sub>42</sub>O<sub>2</sub>Si CAS:112-80-1 MolWeight:354 RetIndex:2222

CompName:Oleic acid-TMS; (Z)-octadec-9-enoic acid

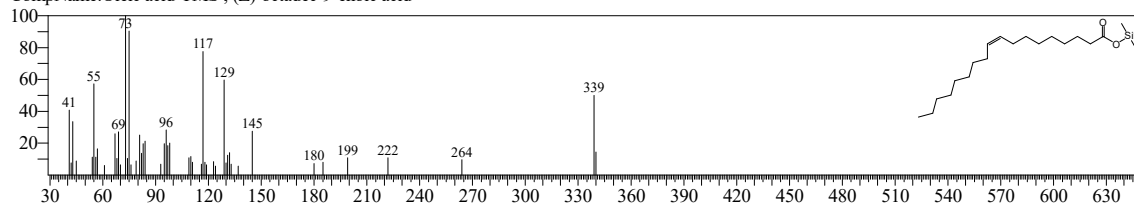

Hit#:3 Entry:487 Library:OA\_TMS\_DB5\_67min\_V3.lib

SI:20 Formula:C<sub>21</sub>H<sub>42</sub>O<sub>2</sub>Si CAS:112-79-8 MolWeight:354 RetIndex:2227

CompName:Elaidic acid-TMS; (E)-octadec-9-enoic acid

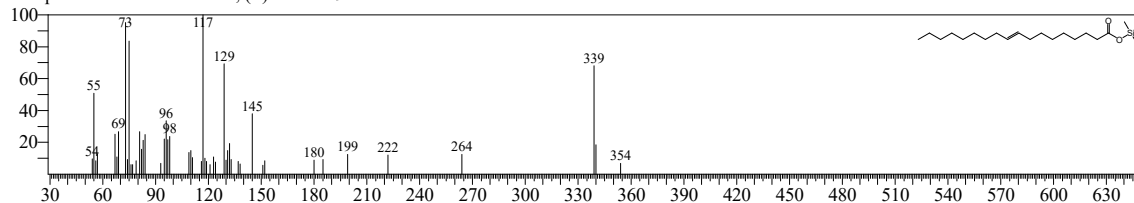

Hit#:4 Entry:139 Library:OA\_TMS\_DB5\_67min\_V3.lib

SI:19 Formula:C<sub>10</sub>H<sub>21</sub>NO<sub>3</sub>Si CAS:16284-60-9 MolWeight:231 RetIndex:1487

CompName:Isovalerylglycine-TMS; 2-(3-methylbutanoylamino)acetic acid

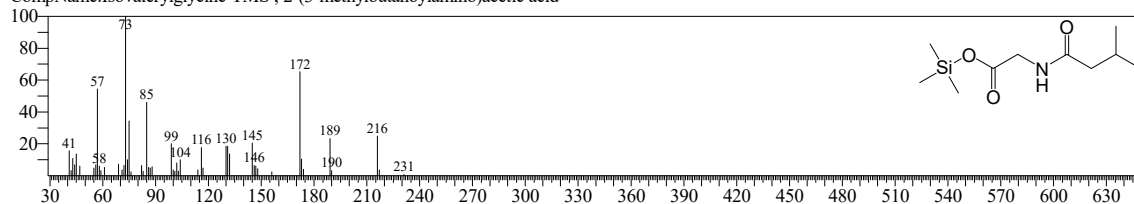

Hit#:5 Entry:442 Library:OA\_TMS\_DB5\_67min\_V3.lib

SI:19 Formula:C<sub>19</sub>H<sub>38</sub>O<sub>2</sub>Si CAS:373-49-9 MolWeight:326 RetIndex:2028

CompName:Palmitoleic acid-TMS; hexadec-9-enoic acid

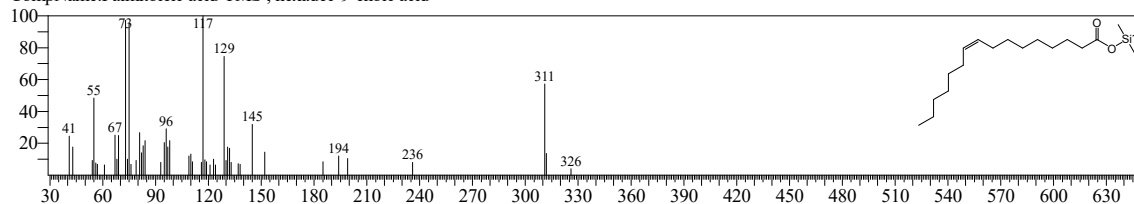

# TNAU

<< Target >>

Line# 5 R.Time: 28.285 (Scan#: 4658) MassPeaks: 359

RawMode: Averaged 28.280-28.290 (4657-4659) BasePeak: 73.05 (1868)

BG Mode: Calc. from Peak Group 1 - Event 1 Q3 Scan

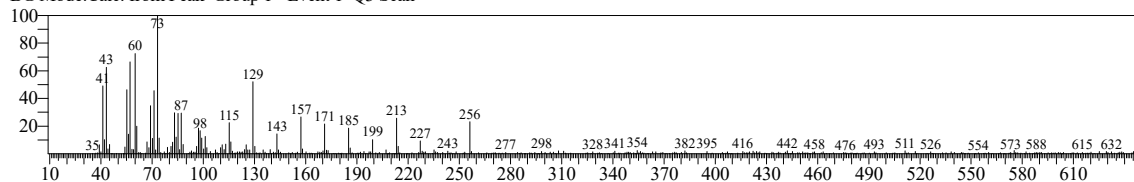

Hit#: 1 Entry: 31600 Library: NIST20R.lib

SI: 94 Formula: C<sub>16</sub>H<sub>32</sub>O<sub>2</sub> CAS: 57-10-3 MolWeight: 256 RetIndex: 1968

CompName: n-Hexadecanoic acid \$ Hexadecanoic acid \$ n-Hexadecic acid \$ Palmitic acid \$ Pentadecanecarboxylic acid \$ 1-Pentadecanecarboxylic

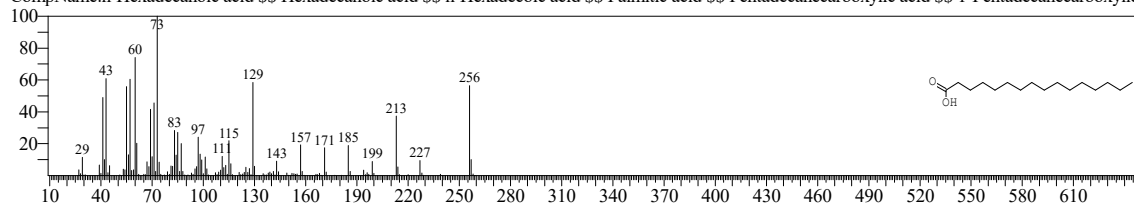

Hit#: 2 Entry: 29890 Library: NIST20R.lib

SI: 90 Formula: C<sub>15</sub>H<sub>30</sub>O<sub>2</sub> CAS: 1002-84-2 MolWeight: 242 RetIndex: 1869

CompName: Pentadecanoic acid \$ Pentadecylic acid \$ n-Pentadecanoic acid \$ n-Pentadecylic acid

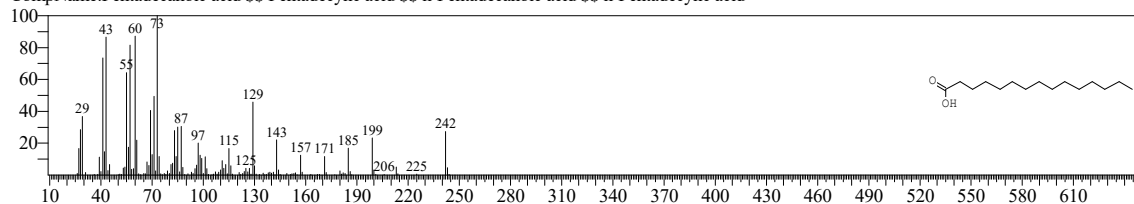

Hit#: 3 Entry: 25643 Library: NIST20R.lib

SI: 90 Formula: C<sub>13</sub>H<sub>26</sub>O<sub>2</sub> CAS: 638-53-9 MolWeight: 214 RetIndex: 1670

CompName: Tridecanoic acid \$ n-Tridecanoic acid \$ n-Tridecoic acid \$ Tridecyclic acid

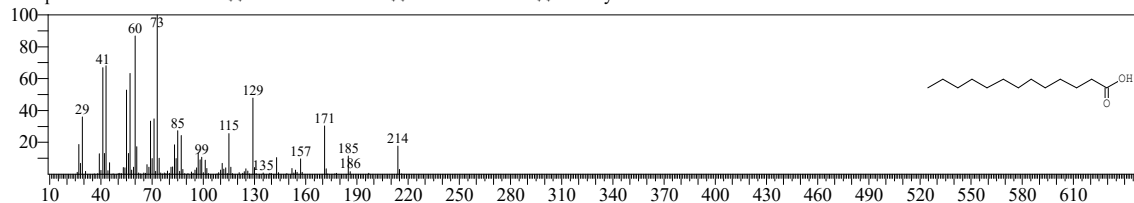

Hit#: 4 Entry: 44286 Library: NIST20M2.lib

SI: 89 Formula: C<sub>38</sub>H<sub>68</sub>O<sub>8</sub> CAS: 28474-90-0 MolWeight: 652 RetIndex: 4765

CompName: l-(+)-Ascorbic acid 2,6-dihexadecanoate

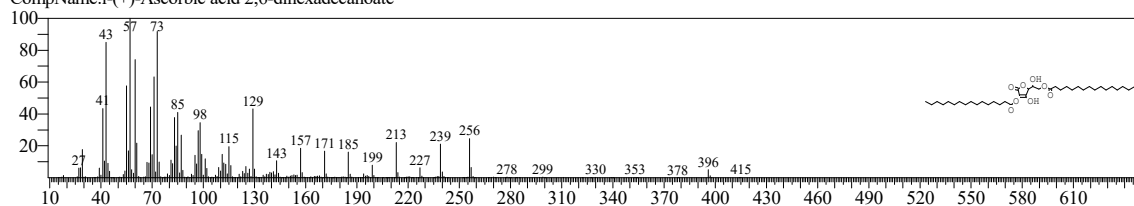

Hit#: 5 Entry: 81713 Library: NIST20M1.lib

SI: 89 Formula: C<sub>14</sub>H<sub>28</sub>O<sub>2</sub> CAS: 544-63-8 MolWeight: 228 RetIndex: 1769

CompName: Tetradecanoic acid \$ Myristic acid \$ n-Tetradecanoic acid \$ n-Tetradecoic acid \$ Neo-Fat 14 \$ Univol U 316S \$ 1-Tridecanecarboxylic

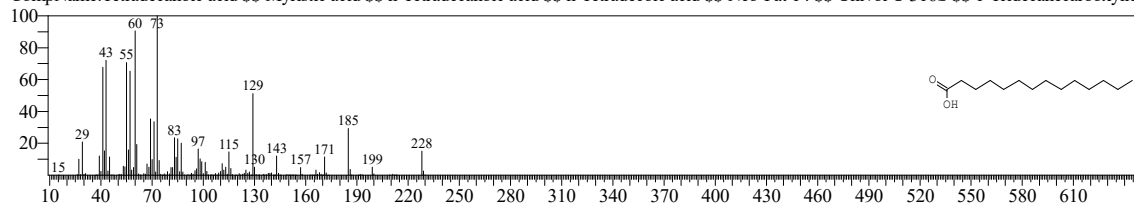

# TNAU

<< Target >>

Line#:6 R.Time:28.410(Scan#:4683) MassPeaks:352

RawMode:Averaged 28.405-28.415(4682-4684) BasePeak:77.00(75)

BG Mode:Calc. from Peak Group 1 - Event 1 Q3 Scan

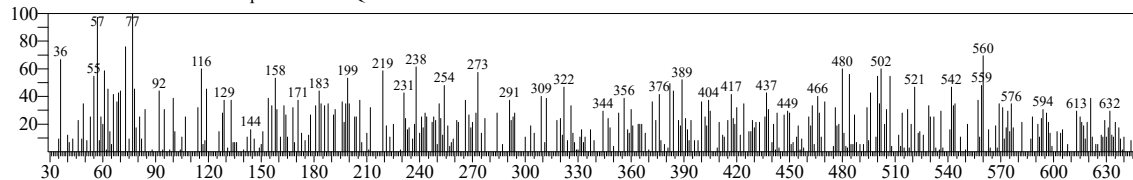

Hit#:1 Entry:440 Library:OA TMS DB5\_67min\_V3.lib

SI:21 Formula: CAS:3054-01-1 MolWeight:0 RetIndex:2015

CompName:S-Benzyl-Cysteine-4TMS ; (2R)-2-amino-3-benzylsulfanylpropanoic acid

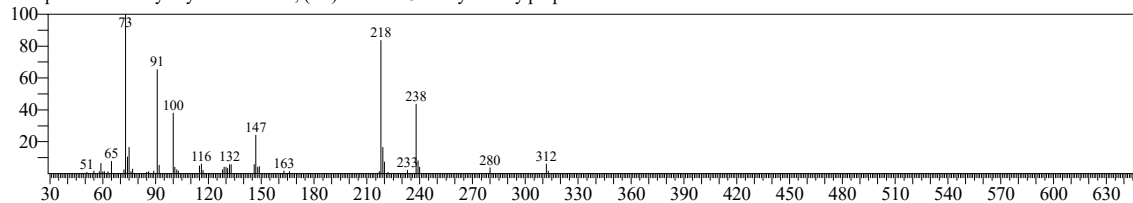

Hit#:2 Entry:156 Library:OA TMS DB5\_67min\_V3.lib

SI:20 Formula:C12H24O4Si2 CAS:4440-68-0 MolWeight:288 RetIndex:1522

CompName:2-Hexenedioic acid-2TMS ; hex-2-enedioic acid

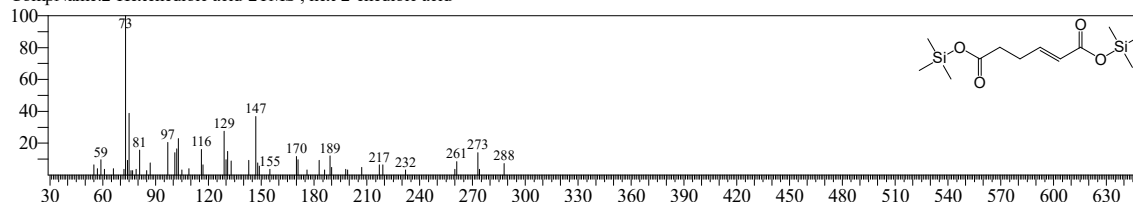

Hit#:3 Entry:177 Library:OA TMS DB5\_67min\_V3.lib

SI:20 Formula:C12H31NO2SSi3 CAS:52-90-4 MolWeight:337 RetIndex:1568

CompName:Cysteine-3TMS ; (2R)-2-amino-3-sulfanylpropanoic acid

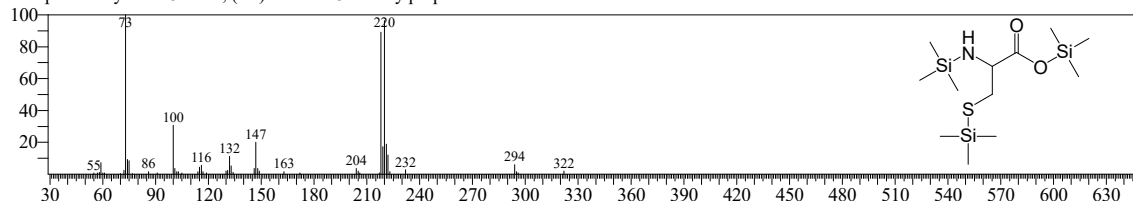

Hit#:4 Entry:103 Library:OA TMS DB5\_67min\_V3.lib

SI:20 Formula:C8H17NO3Si CAS:21709-90-0 MolWeight:203 RetIndex:1359

CompName:Propionylglycine-TMS ; 2-(propanoylamino)acetic acid

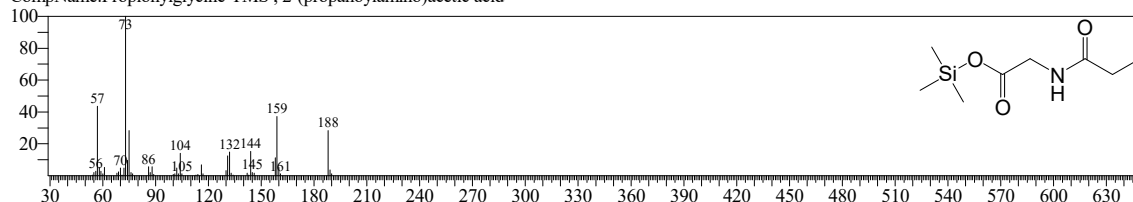

Hit#:5 Entry:125 Library:OA TMS DB5\_67min\_V3.lib

SI:20 Formula:C9H19NO3Si CAS:20208-73-5 MolWeight:217 RetIndex:1446

CompName:N-Butyrylglycine-TMS ; 2-(butanoylamino)acetic acid

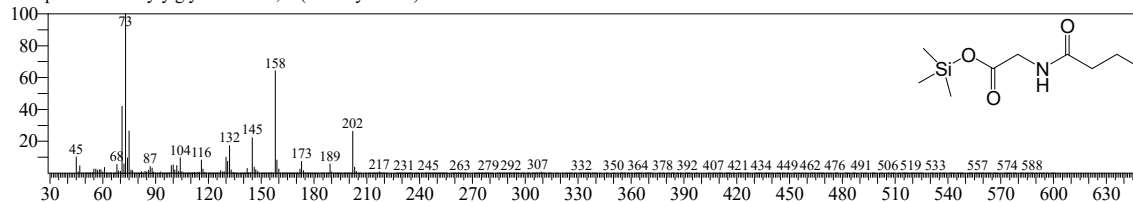

# TNAU

<< Target >>

Line#:7 R.Time:34.065(Scan#:5814) MassPeaks:416

RawMode:Averaged 34.060-34.070(5813-5815) BasePeak:165.00(63)

BG Mode:Calc. from Peak Group 1 - Event 1 Q3 Scan

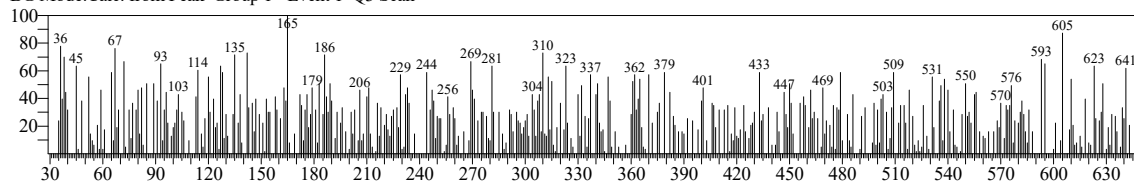

Hit#:1 Entry:34 Library:OA\_TMS\_DB5\_67min\_V3.lib

SI:13 Formula:C10H16OSi CAS:106-44-5 MolWeight:180 RetIndex:1160

CompName:4-Cresol-TMS ; 4-methylphenol

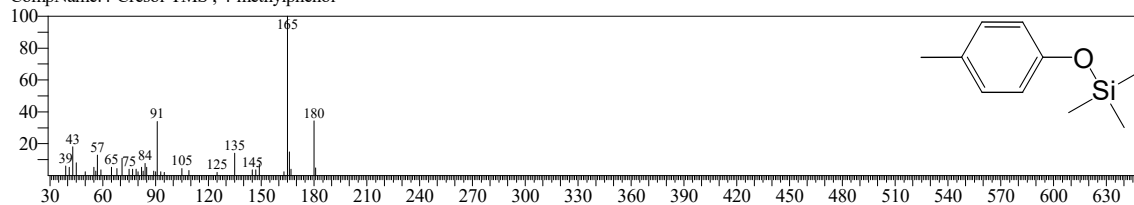

Hit#:2 Entry:145 Library:OA\_TMS\_DB5\_67min\_V3.lib

SI:11 Formula:C14H33NO2Si2 CAS:644-90-6 MolWeight:303 RetIndex:1500

CompName:2-Aminooctanoic acid-2TMS ; 2-aminooctanoic acid

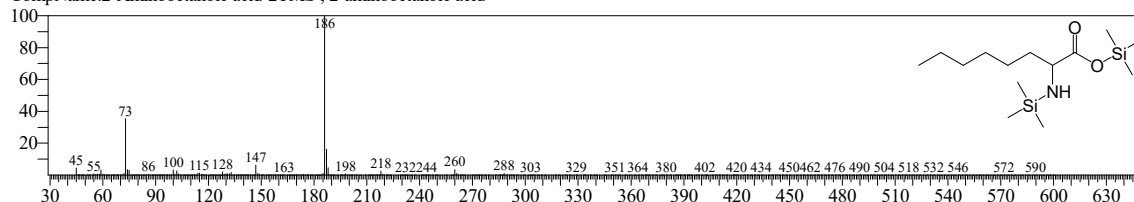

Hit#:3 Entry:456 Library:OA\_TMS\_DB5\_67min\_V3.lib

SI:11 Formula:C18H33NO3Si CAS:37350-58-6 MolWeight:339 RetIndex:2094

CompName:Metoprolol-TMS ; 1-[4-(2-methoxyethyl)phenoxy]-3-(propan-2-ylamino)propan-2-ol

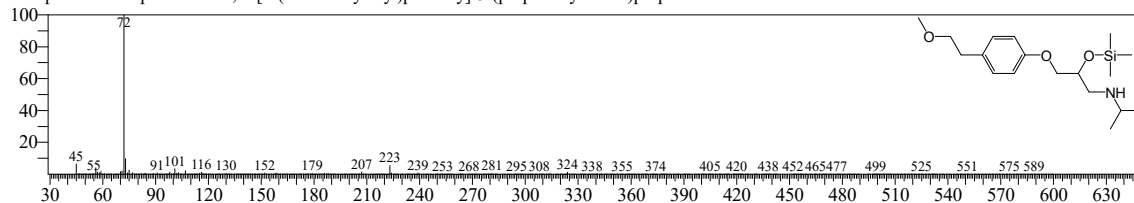

Hit#:4 Entry:228 Library:OA\_TMS\_DB5\_67min\_V3.lib

SI:10 Formula:C10H15NO2Si CAS:150-13-0 MolWeight:209 RetIndex:1661

CompName:4-Aminobenzoic acid-TMS ; 4-aminobenzoic acid

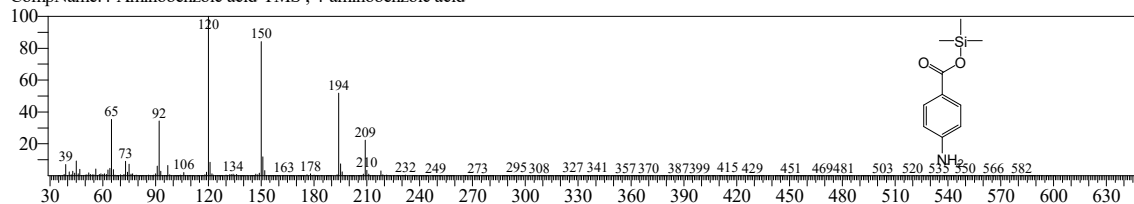

Hit#:5 Entry:89 Library:OA\_TMS\_DB5\_67min\_V3.lib

SI:10 Formula:C11H25NO2Si2 CAS:147-85-3 MolWeight:259 RetIndex:1306

CompName:Proline-2TMS ; (2S)-pyrrolidine-2-carboxylic acid

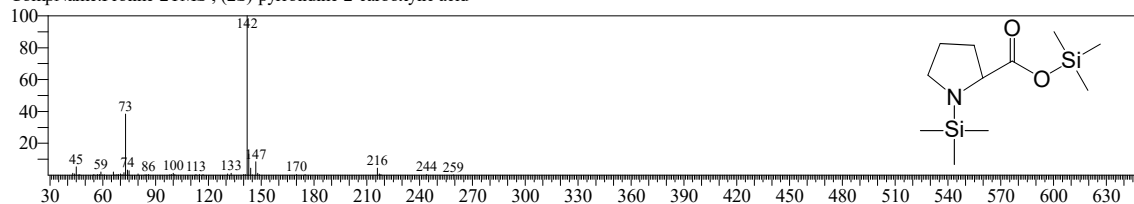



# TNAU

<< Target >>

Line#:8 R.Time:45.590(Scan#:8119) MassPeaks:395

RawMode:Averaged 45.585-45.595(8118-8120) BasePeak:139.15(8533)

BG Mode:Calc. from Peak Group 1 - Event 1 Q3 Scan

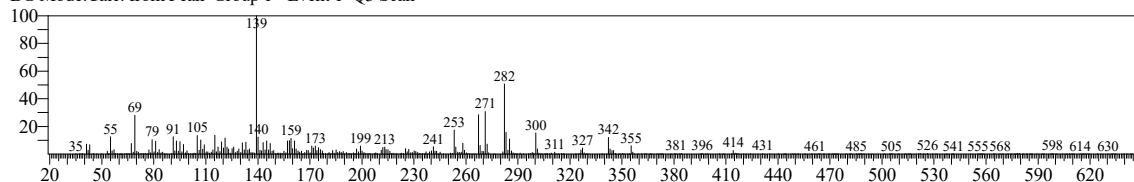

Hit#:1 Entry:8297 Library:NIST20M2.lib

SI:90 Formula:C27H42O3 CAS:512-04-9 MolWeight:414 RetIndex:2844

CompName:Diosgenin \$\$ Spirost-5-en-3-ol, (3.beta.,25R)- \$\$ Spirost-5-en-3.beta.-ol, (25R)- \$\$ Nitrogenin \$\$ 25D-spirost-5-en-3.beta.-ol \$\$ Spiro(8H-nap

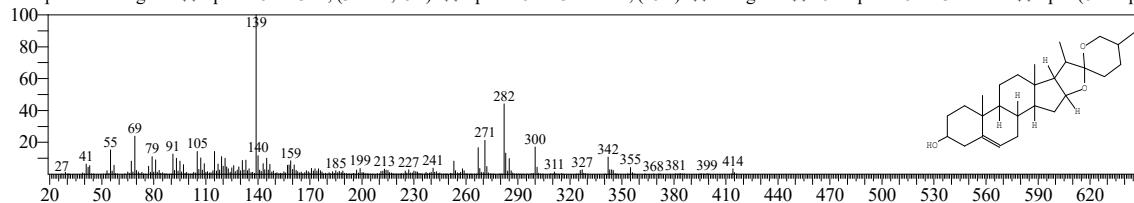

Hit#:2 Entry:14852 Library:NIST20M2.lib

SI:82 Formula:C28H44O3 CAS:116292-24-1 MolWeight:428 RetIndex:2793

CompName:Diosgenin methyl ether \$\$ Diosgenin Me derivative \$\$ (3.beta.,25R)-3-Methoxyspirost-5-ene \$\$ Spirost-5-ene, 3-methoxy-, (3.beta.,25R)-

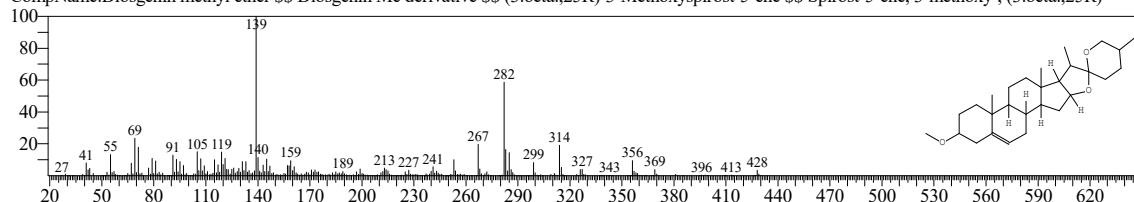

Hit#:3 Entry:24878 Library:NIST20M2.lib

SI:80 Formula:C29H44O4 CAS:1061-54-7 MolWeight:456 RetIndex:2984

CompName:Spirost-5-en-3-ol, acetate, (3.beta.,25R)- \$\$ Diosgenin acetate \$\$ Spirost-5-en-3.beta.-ol, acetate, (25R)- \$\$ Spirost-5-en-3.beta.-ol, acetate, (2-

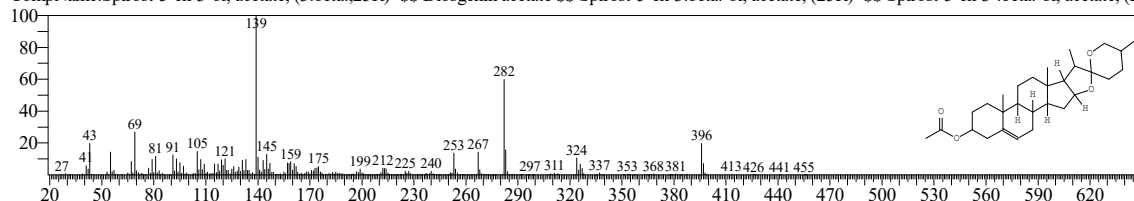

Hit#:4 Entry:41561 Library:NIST20R.lib

SI:79 Formula:C27H42O2 CAS:32277-73-9 MolWeight:398 RetIndex:2713

CompName:Des-N-solasodine \$\$ Furosta-5,20(22)-dien-3-ol #

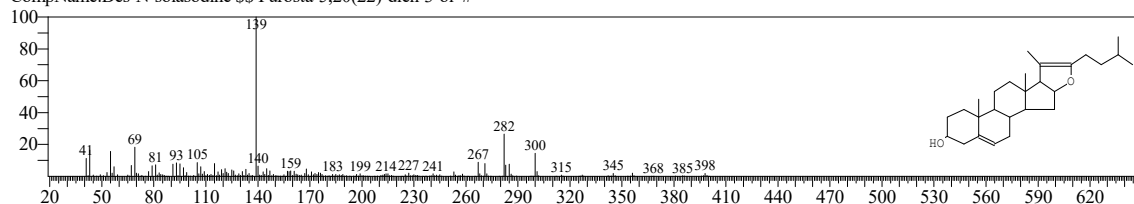

Hit#:5 Entry:42677 Library:NIST20R.lib

SI:74 Formula:C29H44O4 CAS:1180-12-7 MolWeight:456 RetIndex:2984

CompName:Neodiosgenin (3.beta.,25S) acetate \$\$ Spirost-5-en-3-ol, 3-acetate, (3.beta.,25S)- \$\$ Spirost-5-en-3-ol, acetate, (3.beta.,25S)- \$\$ Spirost-5-en-3-

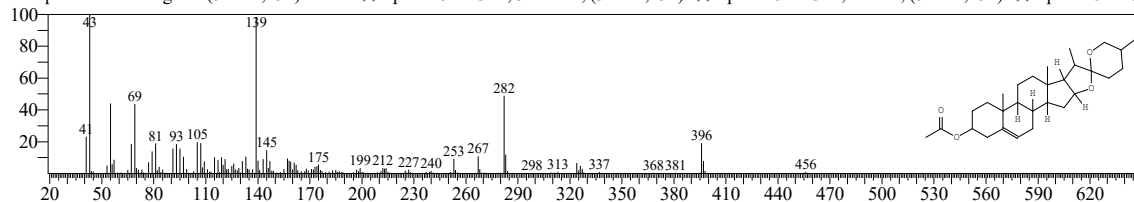

Supplement: Supplementary file 35 [file supplementary]
