# Supplementary material for: Comparative Metabolomics Profiling Reveals Key Metabolites and Associated Pathways Regulating Tuber Dormancy in White Yam (<em>Dioscorea rotundata</em>)
Source: Preprints.org preprint supplement (doi:10.20944/preprints202303.0378.v1), 2023-03-21

# TNAU

## Sample Information

Analyzed by : Admin  
 Analyzed : 05-Aug-22 1:41:40 PM  
 Sample Type : Unknown  
 Level # : 1  
 Sample Name : T101-3  
 Sample ID : T101-3  
 IS Amount : [1]=1  
 Sample Amount : 1  
 Dilution Factor : 1  
 Vial # : 32  
 Injection Volume : 1.00  
 Data File : D:\GCMS-8040NX\Aug 2022\Users\04.08.2022\Data files\04082022-033.qgd  
 Org Data File : D:\GCMS-8040NX\Aug 2022\Users\04.08.2022\Data files\04082022-033.qgd  
 Method File : D:\GCMS-8040NX\Aug 2022\Users\04.08.2022\Method file\27072022\_methodfile.qgm  
 Org Method File : D:\GCMS-8040NX\Aug 2022\Users\04.08.2022\Method file\27072022\_methodfile.qgm  
 Report File :  
 Tuning File : D:\GCMS-8040NX\Aug 2022\Tuning Data\TUNING 04082022.qgt  
 [Comment]  
 Jerry samples  
 Modified by : Admin  
 Modified : 05-Aug-22 4:48:15 PM

Chromatogram T101-3 D:\GCMS-8040NX\Aug 2022\Users\04.08.2022\Data files\04082022-033.qgd

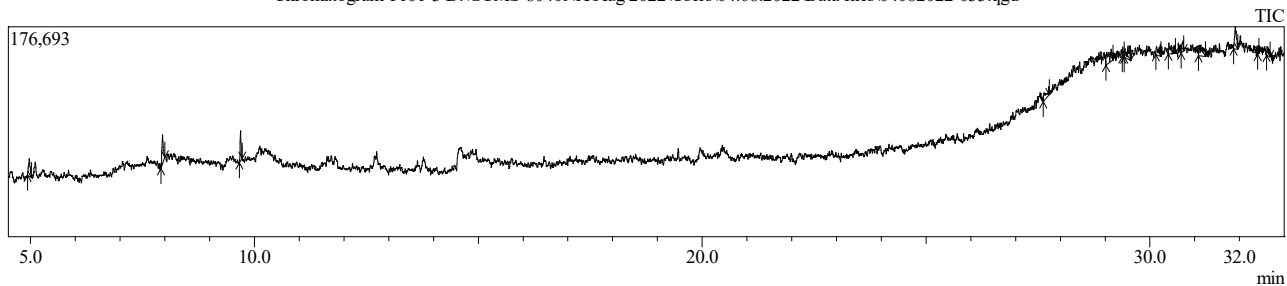

Peak Report TIC

| Peak# | R.Time | Area   | Area%  | Height | Height% | A/H  | Similarity | Name                            |
|-------|--------|--------|--------|--------|---------|------|------------|---------------------------------|
| 1     | 4.970  | 37948  | 7.70   | 14884  | 8.76    | 2.55 | 72         | 3,3-Dimethoxy-2-butanone        |
| 2     | 7.947  | 50910  | 10.33  | 24436  | 14.39   | 2.08 | 88         | Decane                          |
| 3     | 9.690  | 37587  | 7.63   | 25376  | 14.94   | 1.48 | 91         | Undecane                        |
| 4     | 27.740 | 32177  | 6.53   | 7425   | 4.37    | 4.33 | 30         | 3-Hydroxybenzoic acid-2TMS      |
| 5     | 29.030 | 60392  | 12.26  | 9766   | 5.75    | 6.18 | 35         | Batyl alcohol-2TMS              |
| 6     | 29.390 | 10325  | 2.10   | 6834   | 4.02    | 1.51 | 34         | 3,4-Dihydroxymandelic acid-4TMS |
| 7     | 29.545 | 43164  | 8.76   | 12015  | 7.08    | 3.59 | 29         | 3,4-Dihydroxymandelic acid-4TMS |
| 8     | 30.230 | 33424  | 6.78   | 10089  | 5.94    | 3.31 | 41         | 4-Aminobenzoic acid-2TMS        |
| 9     | 30.422 | 36377  | 7.38   | 9085   | 5.35    | 4.00 | 37         | Homovanillic acid-2TMS          |
| 10    | 30.739 | 18632  | 3.78   | 8837   | 5.20    | 2.11 | 33         | Pyridoxine-3TMS                 |
| 11    | 31.100 | 50878  | 10.32  | 8142   | 4.79    | 6.25 | 35         | Anthranilic acid-2TMS           |
| 12    | 31.907 | 54228  | 11.00  | 18588  | 10.95   | 2.92 | 29         | 4-Hydroxybenzoic acid-2TMS      |
| 13    | 32.419 | 5361   | 1.09   | 6860   | 4.04    | 0.78 | 28         | 3-Hydroxybutyric acid-2TMS      |
| 14    | 32.618 | 21387  | 4.34   | 7475   | 4.40    | 2.86 | 39         | 3,4-Dihydroxymandelic acid-4TMS |
|       |        | 492790 | 100.00 | 169812 | 100.00  |      |            |                                 |

Library

# TNAU

<< Target >>

Line#:1 R.Time:4.970(Scan#:95) MassPeaks:288

RawMode:Averaged 4.965-4.975(94-96) BasePeak:89.10(3336)

BG Mode:Calc. from Peak Group 1 - Event 1 Q3 Scan

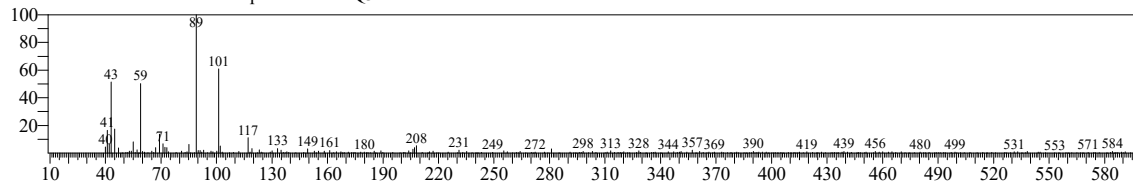

Hit#:1 Entry:9263 Library:NIST20M1.lib

SI:72 Formula:C6H12O3 CAS:21983-72-2 MolWeight:132 RetIndex:821

CompName:3,3-Dimethoxy-2-butanone

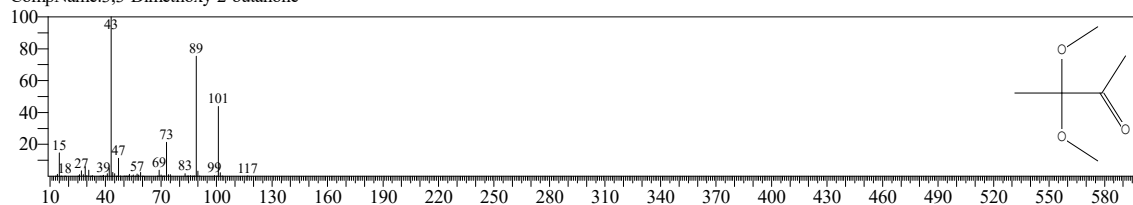

Hit#:2 Entry:7425 Library:NIST20R.lib

SI:72 Formula:C6H14O3 CAS:110-98-5 MolWeight:134 RetIndex:1018

CompName:2-Propanol, 1,1'-oxybis- \$ 2-Propanol, 1,1'-oxydi- \$ Bis(2-hydroxypropyl) ether \$ 1,1'-Oxydi-2-propanol \$ 2,2'-Dihydroxydipropyl ether \$

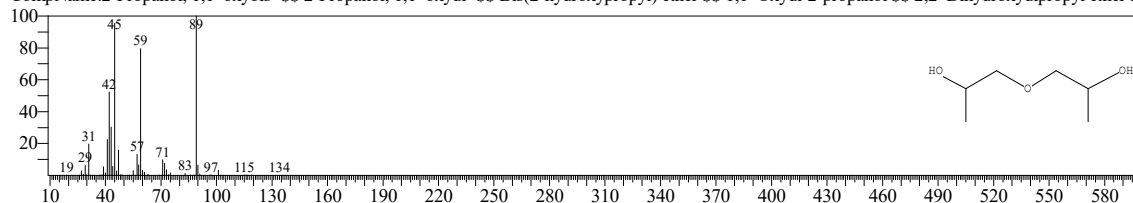

Hit#:3 Entry:16032 Library:NIST20M1.lib

SI:71 Formula:C7H16O3 CAS:6607-66-5 MolWeight:148 RetIndex:860

CompName:1,3,3-Trimethoxybutane \$ Butane, 1,3,3-trimethoxy-

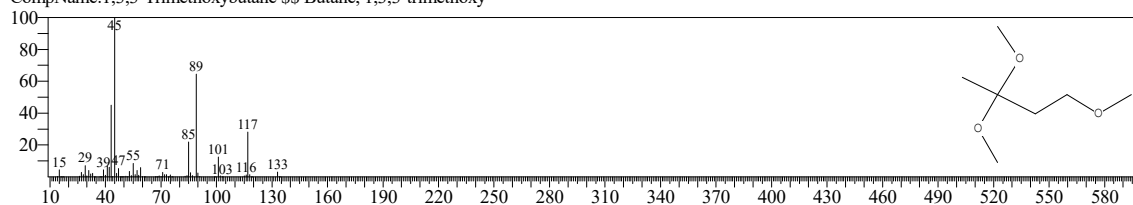

Hit#:4 Entry:81501 Library:NIST20M1.lib

SI:71 Formula:C13H28OSi CAS:0-00-0 MolWeight:228 RetIndex:1097

CompName:4-Methoxy-6-methyl-3-(trimethylsilyl)methyl-1-heptene

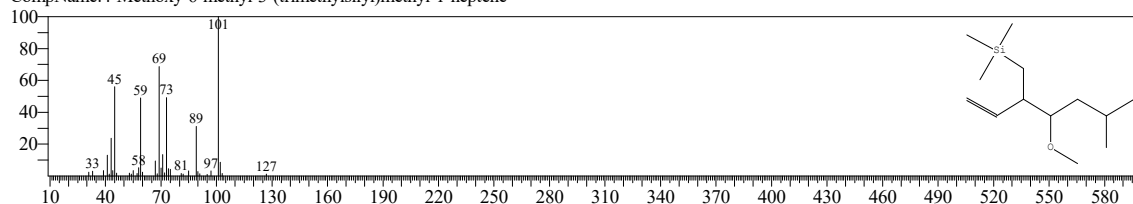

Hit#:5 Entry:22897 Library:NIST20M1.lib

SI:71 Formula:C8H16O3 CAS:0-00-0 MolWeight:160 RetIndex:931

CompName:2-Hydroxyisocaproic acid, methyl ether, methyl ester

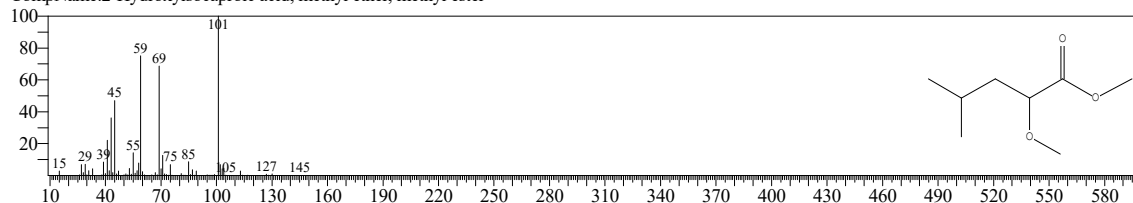

# TNAU

<< Target >>

Line#:2 R.Time:7.945(Scan#:690) MassPeaks:283

RawMode:Averaged 7.940-7.950(689-691) BasePeak:57.10(4952)

BG Mode:Calc. from Peak Group 1 - Event 1 Q3 Scan

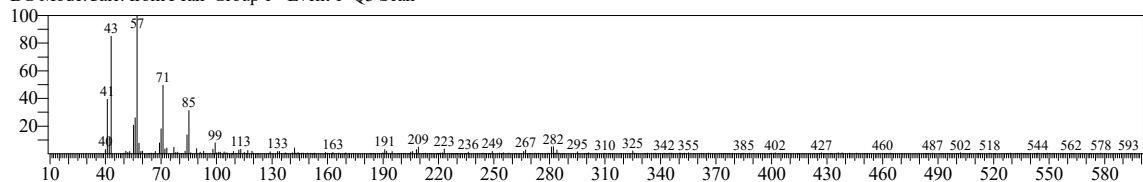

Hit#:1 Entry:13604 Library:NIST20M1.lib

SI:88 Formula:C10H22 CAS:124-18-5 MolWeight:142 RetIndex:1000

CompName:Decane \$\$ n-Decane \$\$ n-C10H22 \$\$ UN 2247

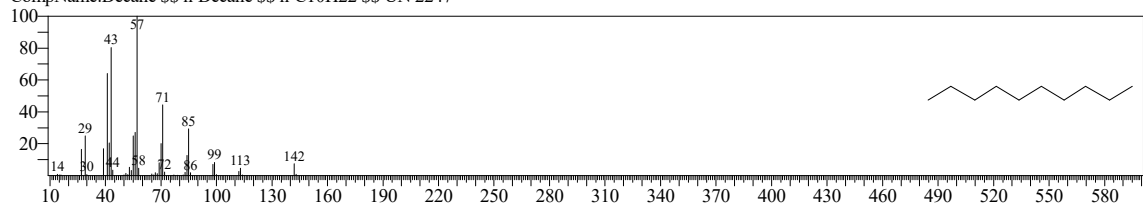

Hit#:2 Entry:12897 Library:NIST20R.lib

SI:88 Formula:C11H24 CAS:1120-21-4 MolWeight:156 RetIndex:1100

CompName:Undecane \$\$ n-Undecane \$\$ Hendecane \$\$ n-C11H24 \$\$ UN 2330

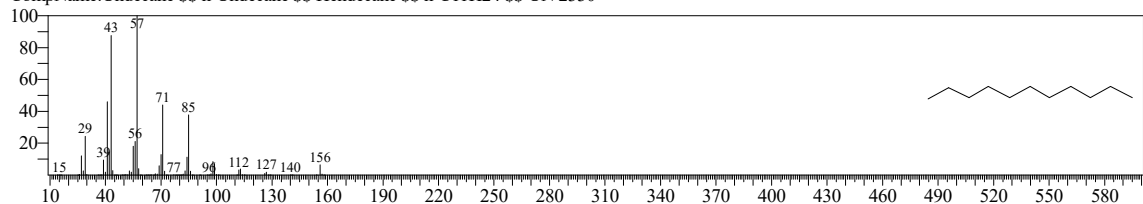

Hit#:3 Entry:19410 Library:NIST20R.lib

SI:87 Formula:C13H28 CAS:629-50-5 MolWeight:184 RetIndex:1300

CompName:Tridecane \$\$ n-Tridecane \$\$ Tridecane, n-

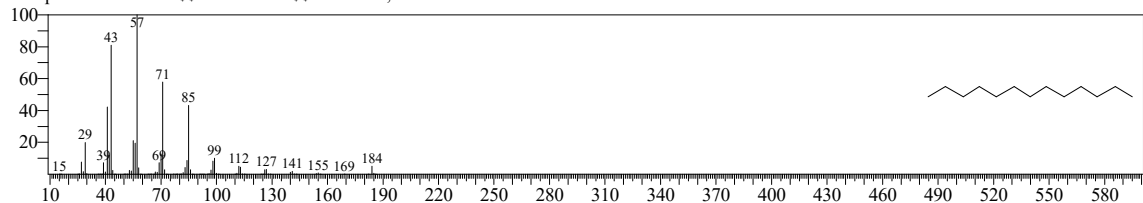

Hit#:4 Entry:30057 Library:NIST20M1.lib

SI:87 Formula:C12H26 CAS:112-40-3 MolWeight:170 RetIndex:1200

CompName:Dodecane \$\$ n-Dodecane \$\$ Adakane 12 \$\$ Ba 51-090453 \$\$ CH3(CH2)10CH3 \$\$ Bihexyl \$\$ Dihexyl \$\$ Duodecane \$\$ NSC 8714

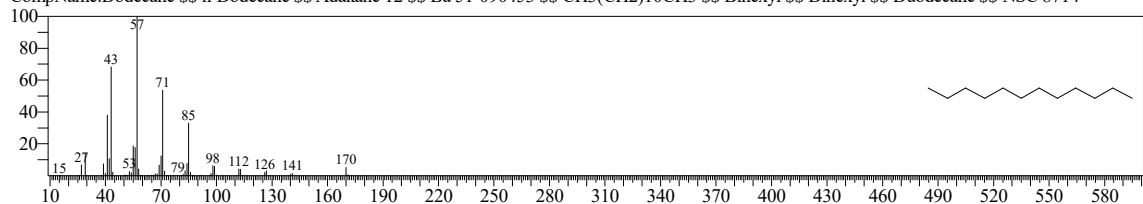

Hit#:5 Entry:27736 Library:NIST20R.lib

SI:86 Formula:C16H34 CAS:544-76-3 MolWeight:226 RetIndex:1600

CompName:Hexadecane \$\$ n-Cetane \$\$ n-Hexadecane \$\$ Cetane

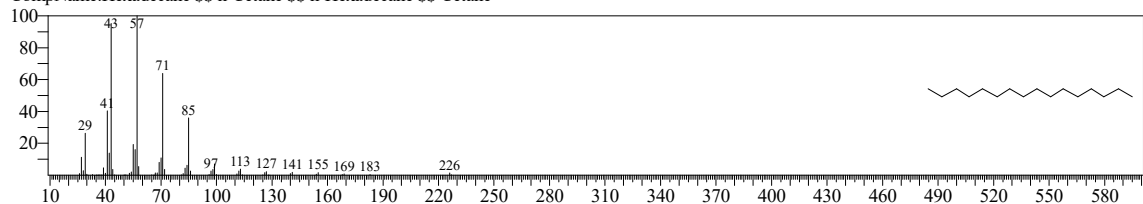

# TNAU

<< Target >>

Line#3 R.Time:9.690(Scan#:1039) MassPeaks:282

RawMode:Averaged 9.685-9.695(1038-1040) BasePeak:57.10(5358)

BG Mode:Calc. from Peak Group 1 - Event 1 Q3 Scan

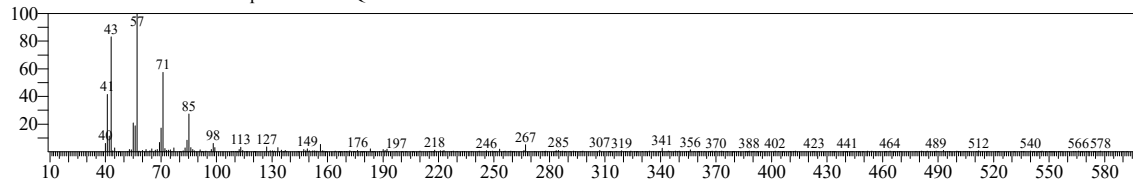

Hit#:1 Entry:12897 Library:NIST20R.lib

SI:91 Formula:C11H24 CAS:1120-21-4 MolWeight:156 RetIndex:1100

CompName:Undecane \$\$ n-Undecane \$\$ Hendecane \$\$ n-C11H24 \$\$ UN 2330

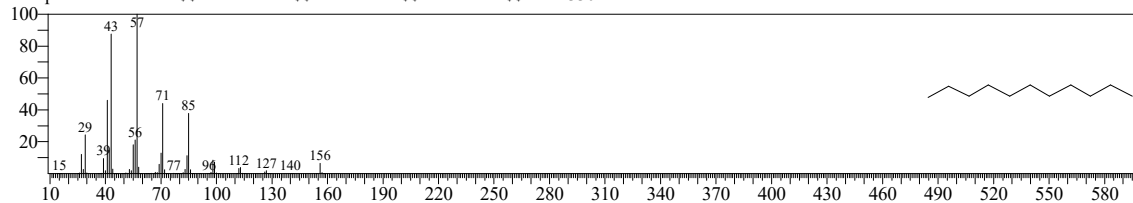

Hit#:2 Entry:19410 Library:NIST20R.lib

SI:90 Formula:C13H28 CAS:629-50-5 MolWeight:184 RetIndex:1300

CompName:Tridecane \$\$ n-Tridecane \$\$ Tridecane, n-

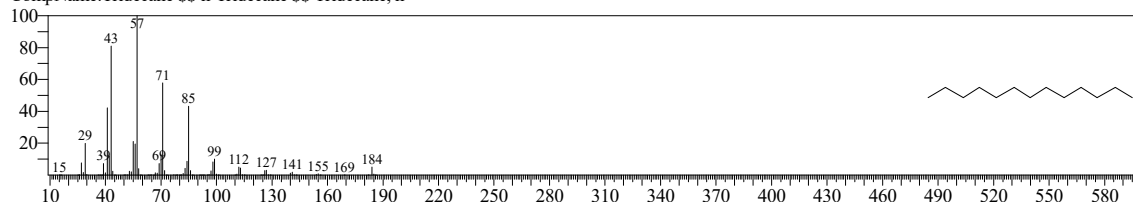

Hit#:3 Entry:16191 Library:NIST20R.lib

SI:90 Formula:C12H26 CAS:112-40-3 MolWeight:170 RetIndex:1200

CompName:Dodecane \$\$ n-Dodecane \$\$ Adakane 12 \$\$ Ba 51-090453 \$\$ CH3(CH2)10CH3 \$\$ Bihexyl \$\$ Dihexyl \$\$ Duodecane \$\$ NSC 8714

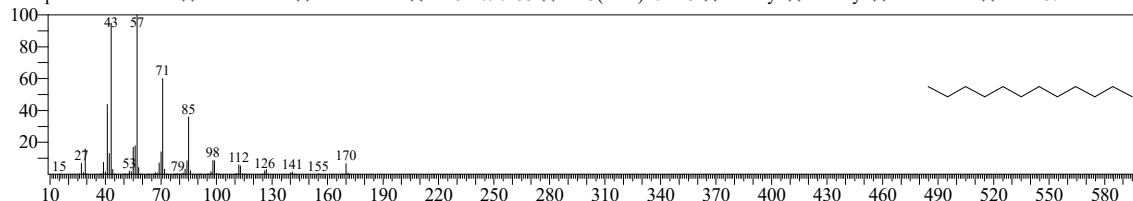

Hit#:4 Entry:27736 Library:NIST20R.lib

SI:89 Formula:C16H34 CAS:544-76-3 MolWeight:226 RetIndex:1600

CompName:Hexadecane \$\$ n-Cetane \$\$ n-Hexadecane \$\$ Cetane

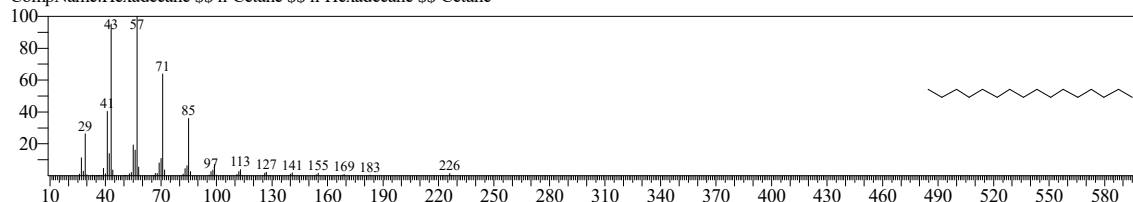

Hit#:5 Entry:125877 Library:NIST20M1.lib

SI:89 Formula:C19H40 CAS:54105-67-8 MolWeight:268 RetIndex:1782

CompName:Heptadecane, 2,6-dimethyl- \$\$ 2,6-Dimethylheptadecane #

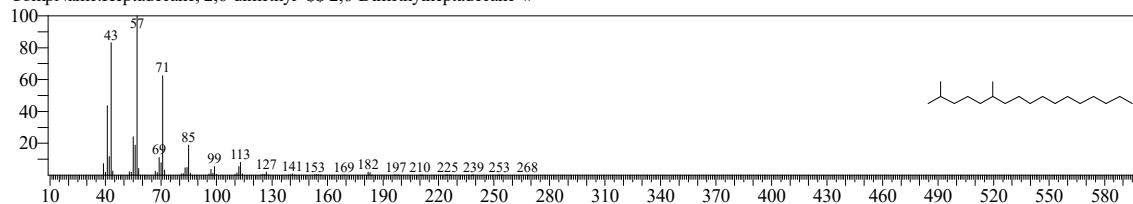

# TNAU

<< Target >>

Line#:4 R.Time:27.740(Scan#:4649) MassPeaks:303

RawMode:Averaged 27.735-27.745(4648-4650) BasePeak:207.05(1217)

BG Mode:Calc. from Peak Group 1 - Event 1 Q3 Scan

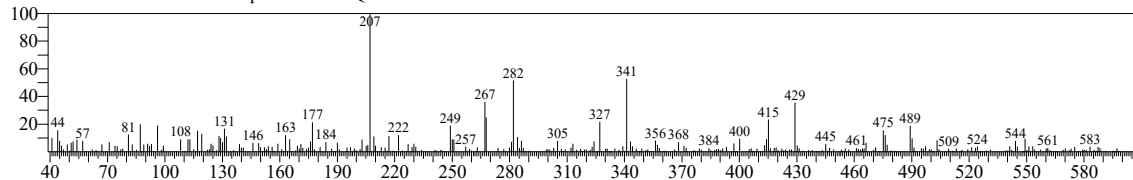

Hit#:1 Entry:179 Library:OA\_TMS\_DB5\_67min\_V3.lib

SI:30 Formula:C<sub>13</sub>H<sub>22</sub>O<sub>3</sub>Si<sub>2</sub> CAS:99-06-9 MolWeight:282 RetIndex:1572

CompName:3-Hydroxybenzoic acid-2TMS ; 3-hydroxybenzoic acid

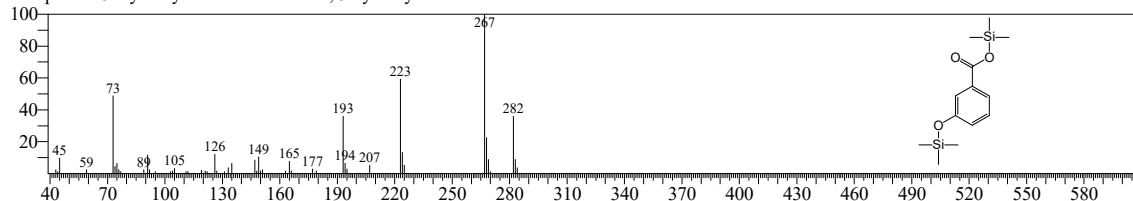

Hit#:2 Entry:491 Library:OA\_TMS\_DB5\_67min\_V3.lib

SI:30 Formula:C<sub>21</sub>H<sub>44</sub>O<sub>2</sub>Si CAS:57-11-4 MolWeight:356 RetIndex:2244

CompName:Stearic acid-TMS ; octadecanoic acid

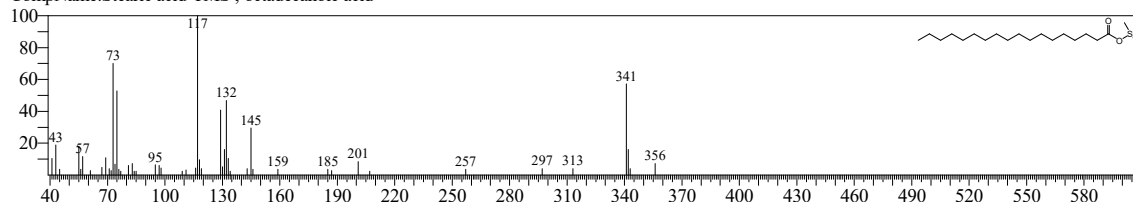

Hit#:3 Entry:341 Library:OA\_TMS\_DB5\_67min\_V3.lib

SI:24 Formula:C<sub>18</sub>H<sub>34</sub>O<sub>4</sub>Si<sub>3</sub> CAS:3247-75-4 MolWeight:398 RetIndex:1864

CompName:3-(3-Hydroxyphenyl)-3-hydroxypropionic acid-3TMS ; 3-hydroxy-3-(3-hydroxyphenyl)propanoic acid

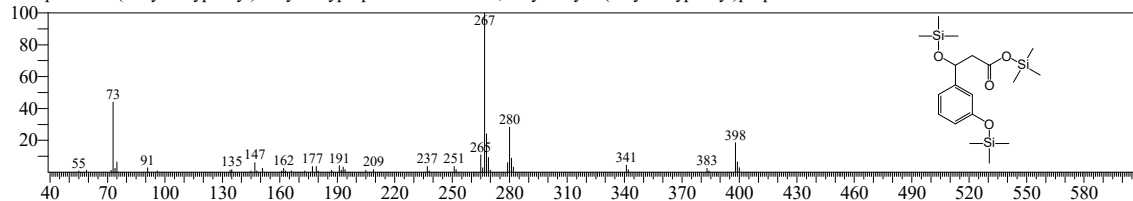

Hit#:4 Entry:211 Library:OA\_TMS\_DB5\_67min\_V3.lib

SI:24 Formula:C<sub>13</sub>H<sub>22</sub>O<sub>3</sub>Si<sub>2</sub> CAS:99-96-7 MolWeight:282 RetIndex:1636

CompName:4-Hydroxybenzoic acid-2TMS ; 4-hydroxybenzoic acid

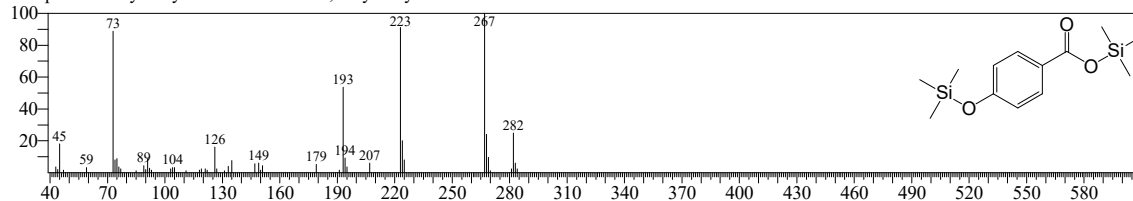

Hit#:5 Entry:10 Library:OA\_TMS\_DB5\_67min\_V3.lib

SI:20 Formula:C<sub>10</sub>H<sub>24</sub>O<sub>3</sub>Si<sub>2</sub> CAS:594-61-6 MolWeight:248 RetIndex:1067

CompName:2-Hydroxyisobutyric acid-2TMS ; 2-hydroxy-2-methylpropanoic acid

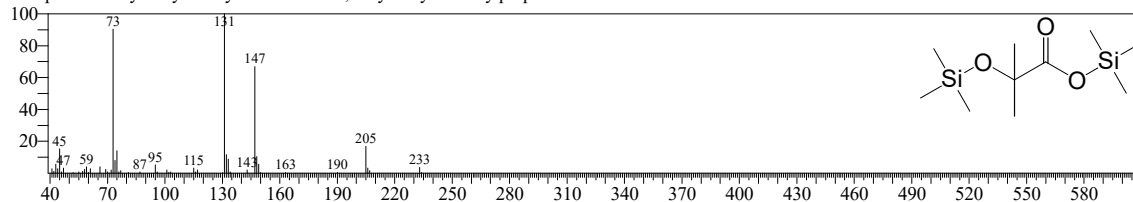

# TNAU

<< Target >>

Line#:5 R.Time:29.030(Scan#:4907) MassPeaks:314

RawMode:Averaged 29.025-29.035(4906-4908) BasePeak:207.05(1796)

BG Mode:Calc. from Peak Group 1 - Event 1 Q3 Scan

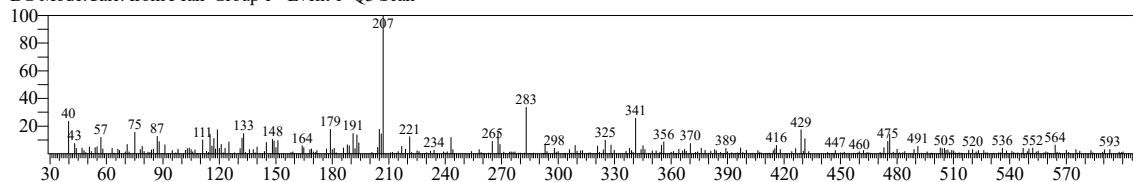

Hit#:1 Entry:539 Library:OA\_TMS\_DB5\_67min\_V3.lib

SI:35 Formula:C27H60O3Si2 CAS:544-62-7 MolWeight:488 RetIndex:2684

CompName:Batyl alcohol-2TMS ; 3-octadecoxypropane-1,2-diol

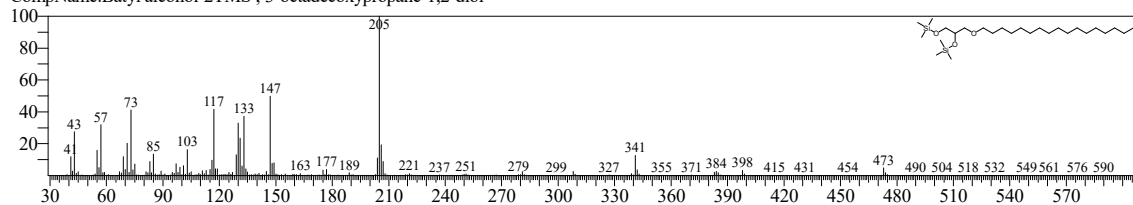

Hit#:2 Entry:491 Library:OA\_TMS\_DB5\_67min\_V3.lib

SI:32 Formula:C21H44O2Si CAS:57-11-4 MolWeight:356 RetIndex:2244

CompName:Stearic acid-TMS ; octadecanoic acid

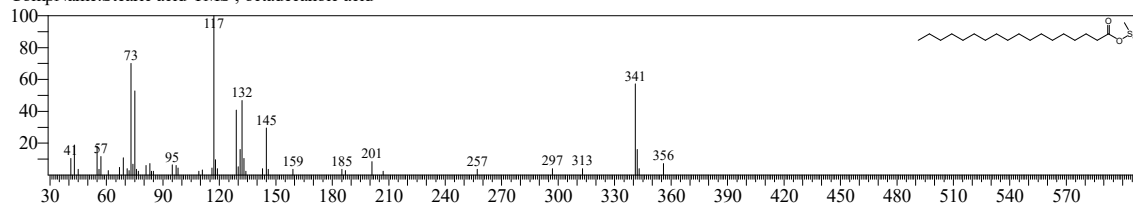

Hit#:3 Entry:382 Library:OA\_TMS\_DB5\_67min\_V3.lib

SI:30 Formula:C18H34O4Si3 CAS:6482-98-0 MolWeight:398 RetIndex:1918

CompName:4-Hydroxyphenyllactic acid-3TMS ; 2-hydroxy-3-(4-hydroxyphenyl)propanoate

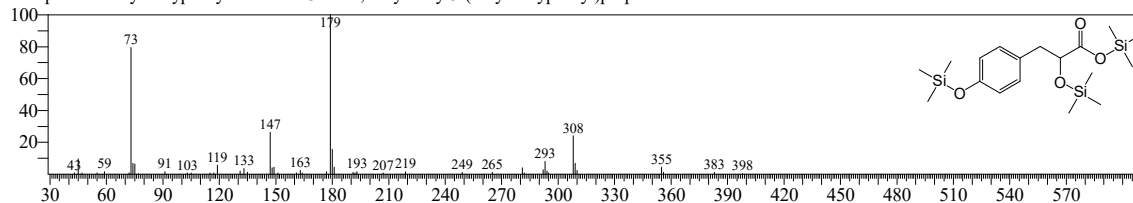

Hit#:4 Entry:402 Library:OA\_TMS\_DB5\_67min\_V3.lib

SI:29 Formula:C20H42O4Si4 CAS:775-01-9 MolWeight:458 RetIndex:1942

CompName:3,4-Dihydroxymandelic acid-4TMS ; 2-(3,4-dihydroxyphenyl)-2-hydroxyacetic acid

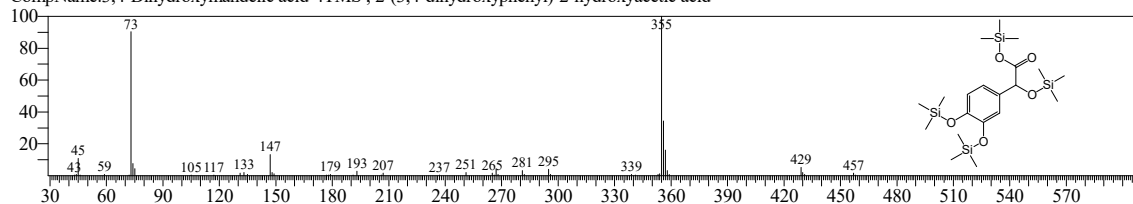

Hit#:5 Entry:315 Library:OA\_TMS\_DB5\_67min\_V3.lib

SI:27 Formula:C16H30O4Si3 CAS:99-50-3 MolWeight:370 RetIndex:1833

CompName:Protocatechuic acid-3TMS ; 3,4-dihydroxybenzoic acid

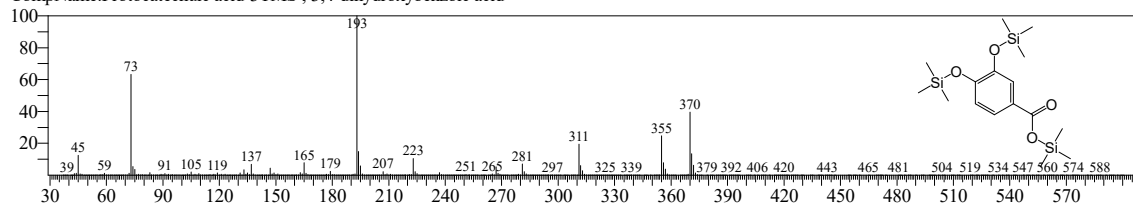

# TNAU

<< Target >>

Line#:6 R.Time:29.390(Scan#:4979) MassPeaks:295

RawMode:Averaged 29.385-29.395(4978-4980) BasePeak:207.05(1805)

BG Mode:Calc. from Peak Group 1 - Event 1 Q3 Scan

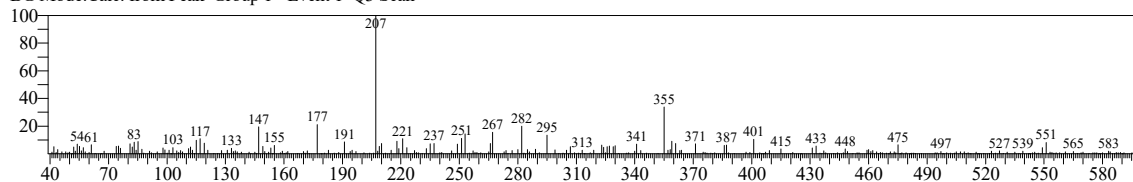

Hit#:1 Entry:402 Library:OA\_TMS\_DB5\_67min\_V3.lib

SI:34 Formula:C20H42O4Si4 CAS:775-01-9 MolWeight:458 RetIndex:1942

CompName:3,4-Dihydroxymandelic acid-4TMS ; 2-(3,4-dihydroxyphenyl)-2-hydroxyacetic acid

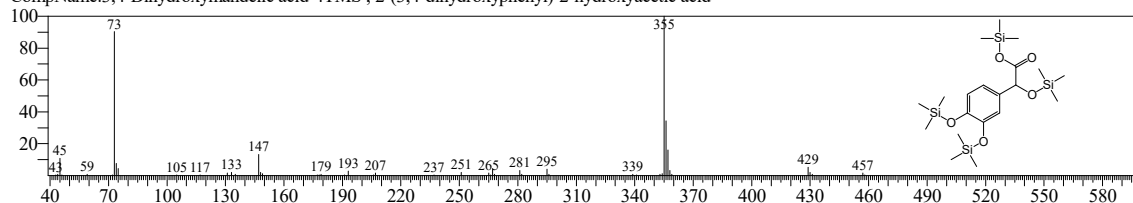

Hit#:2 Entry:13 Library:OA\_TMS\_DB5\_67min\_V3.lib

SI:28 Formula:C8H20O3Si2 CAS:79-14-1 MolWeight:220 RetIndex:1074

CompName:Glycolic acid-2TMS ; 2-hydroxyacetic acid

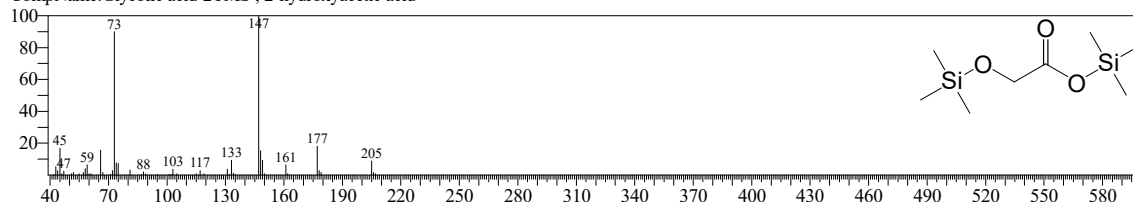

Hit#:3 Entry:413 Library:OA\_TMS\_DB5\_67min\_V3.lib

SI:27 Formula:C18H35NO3Si3 CAS:60-18-4 MolWeight:397 RetIndex:1958

CompName:Tyrosine-3TMS ; (2S)-2-amino-3-(4-hydroxyphenyl)propanoic acid

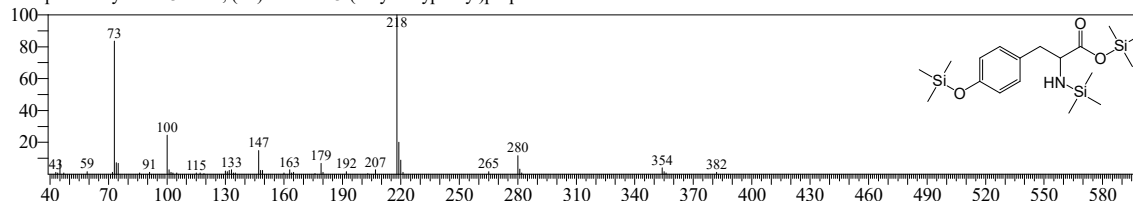

Hit#:4 Entry:179 Library:OA\_TMS\_DB5\_67min\_V3.lib

SI:26 Formula:C13H22O3Si2 CAS:99-06-9 MolWeight:282 RetIndex:1572

CompName:3-Hydroxybenzoic acid-2TMS ; 3-hydroxybenzoic acid

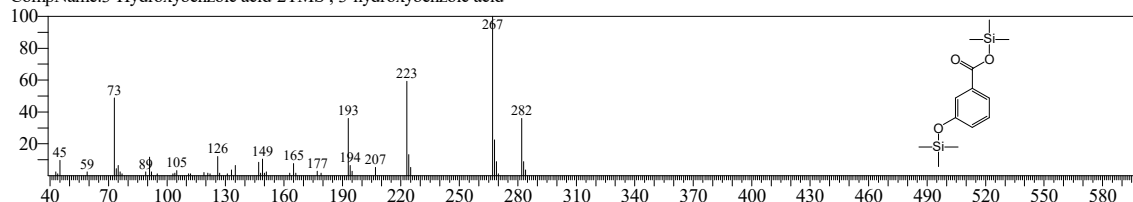

Hit#:5 Entry:45 Library:OA\_TMS\_DB5\_67min\_V3.lib

SI:26 Formula:C11H26O3Si2 CAS:473-86-9 MolWeight:262 RetIndex:1208

CompName:2-Methyl-3-hydroxybutyric acid-2TMS(2) ; 3-hydroxy-2-methylbutanoic acid

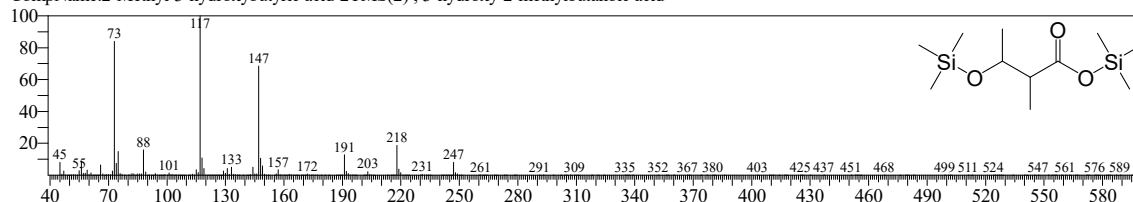

# TNAU

<< Target >>

Line#:7 R.Time:29.545(Scan#:5010) MassPeaks:313

RawMode:Averaged 29.540-29.550(5009-5011) BasePeak:281.10(2581)

BG Mode:Calc. from Peak Group 1 - Event 1 Q3 Scan

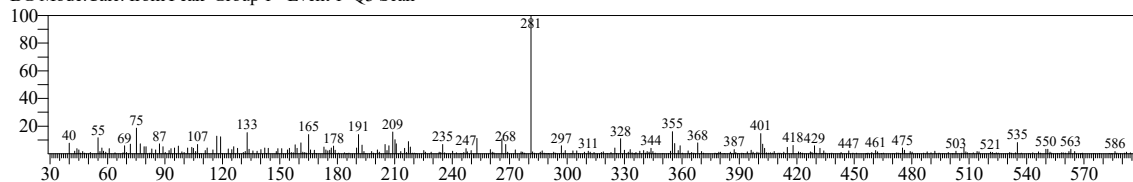

Hit#:1 Entry:402 Library:OA\_TMS\_DB5\_67min\_V3.lib

SI:29 Formula:C20H42O4Si4 CAS:775-01-9 MolWeight:458 RetIndex:1942

CompName:3,4-Dihydroxymandelic acid-4TMS ; 2-(3,4-dihydroxyphenyl)-2-hydroxyacetic acid

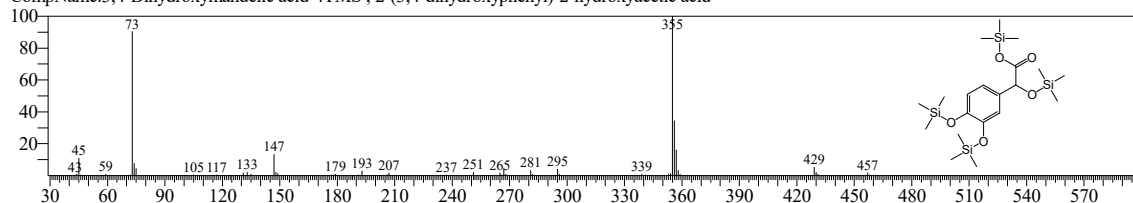

Hit#:2 Entry:203 Library:OA\_TMS\_DB5\_67min\_V3.lib

SI:28 Formula:C13H23NO2Si2 CAS:118-92-3 MolWeight:281 RetIndex:1623

CompName:Anthranilic acid-2TMS ; 2-aminobenzoic acid

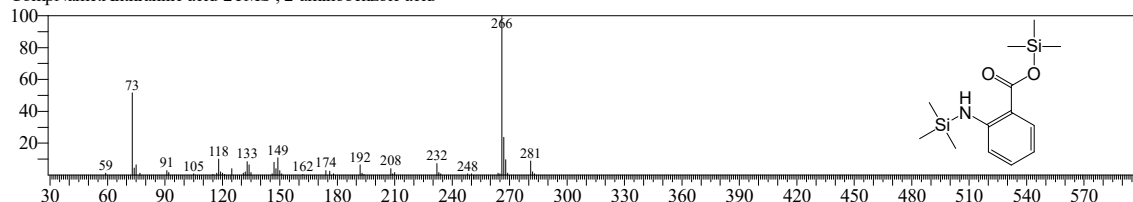

Hit#:3 Entry:315 Library:OA\_TMS\_DB5\_67min\_V3.lib

SI:27 Formula:C16H30O4Si3 CAS:99-50-3 MolWeight:370 RetIndex:1833

CompName:Protocatechuic acid-3TMS ; 3,4-dihydroxybenzoic acid

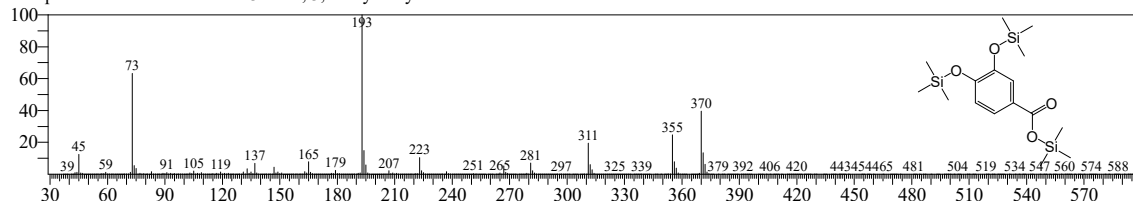

Hit#:4 Entry:456 Library:OA\_TMS\_DB5\_67min\_V3.lib

SI:26 Formula:C18H33NO3Si CAS:37350-58-6 MolWeight:339 RetIndex:2094

CompName:Metoprolol-TMS ; 1-[4-(2-methoxyethyl)phenoxy]-3-(propan-2-ylamino)propan-2-ol

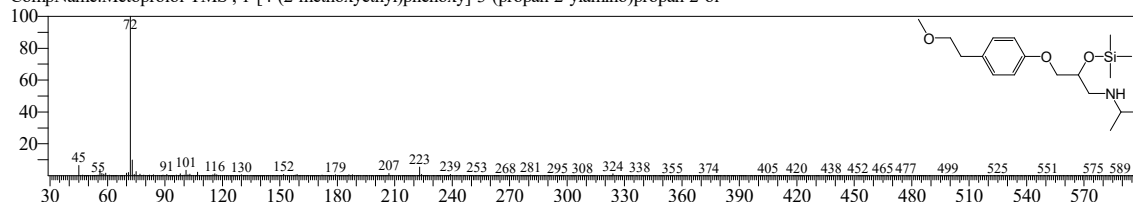

Hit#:5 Entry:539 Library:OA\_TMS\_DB5\_67min\_V3.lib

SI:25 Formula:C27H60O3Si2 CAS:544-62-7 MolWeight:488 RetIndex:2684

CompName:Batyl alcohol-2TMS ; 3-octadecoxypropane-1,2-diol

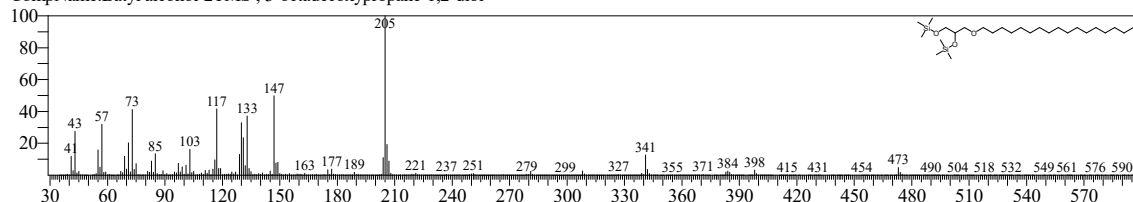



# TNAU

<< Target >>

Line#:8 R.Time:30.230(Scan#:5147) MassPeaks:302

RawMode:Averaged 30.225-30.235(5146-5148) BasePeak:207.05(1351)

BG Mode:Calc. from Peak Group 1 - Event 1 Q3 Scan

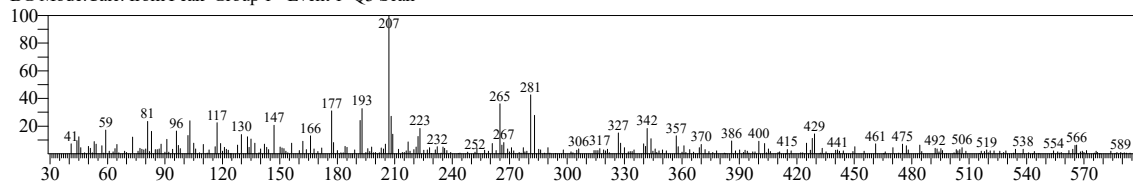

Hit#:1 Entry:328 Library:OA\_TMS\_DB5\_67min\_V3.lib

SI:41 Formula:C13H23NO2Si2 CAS:150-13-0 MolWeight:281 RetIndex:1845

CompName:4-Aminobenzoic acid-2TMS ; 4-aminobenzoic acid

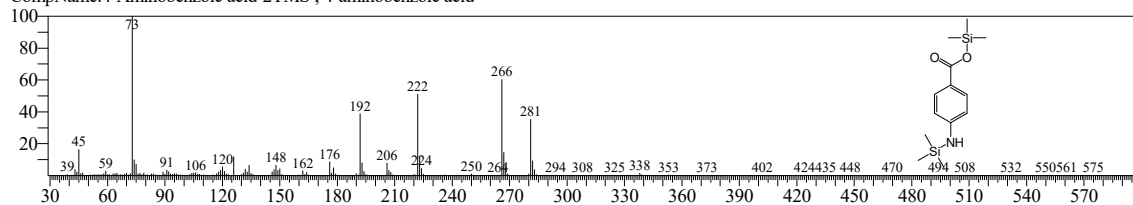

Hit#:2 Entry:211 Library:OA\_TMS\_DB5\_67min\_V3.lib

SI:37 Formula:C13H22O3Si2 CAS:99-96-7 MolWeight:282 RetIndex:1636

CompName:4-Hydroxybenzoic acid-2TMS ; 4-hydroxybenzoic acid

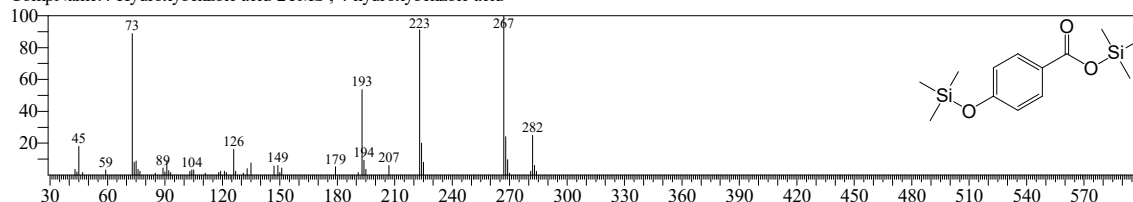

Hit#:3 Entry:179 Library:OA\_TMS\_DB5\_67min\_V3.lib

SI:37 Formula:C13H22O3Si2 CAS:99-06-9 MolWeight:282 RetIndex:1572

CompName:3-Hydroxybenzoic acid-2TMS ; 3-hydroxybenzoic acid

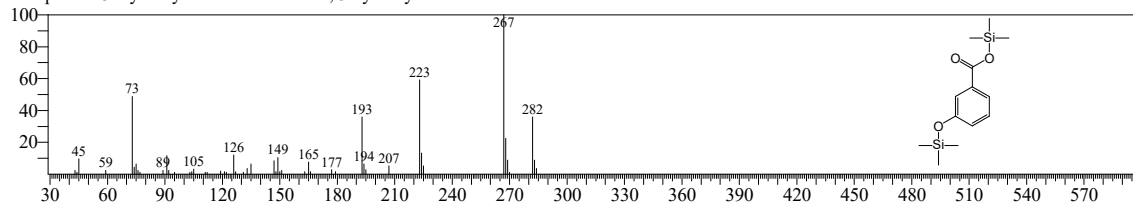

Hit#:4 Entry:77 Library:OA\_TMS\_DB5\_67min\_V3.lib

SI:34 Formula:C12H32O3Si3 CAS:56-81-5 MolWeight:308 RetIndex:1279

CompName:Glycerol-3TMS ; propane-1,2,3-triol

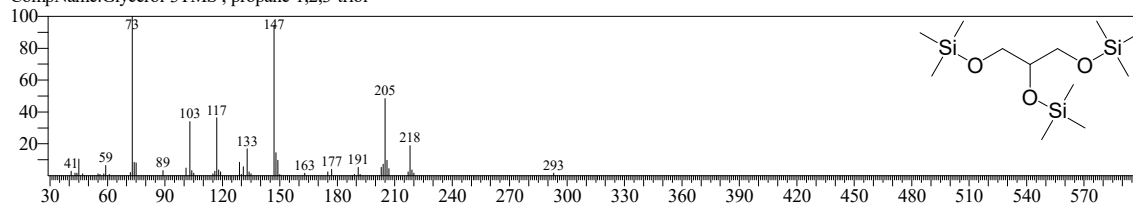

Hit#:5 Entry:315 Library:OA\_TMS\_DB5\_67min\_V3.lib

SI:34 Formula:C16H30O4Si3 CAS:99-50-3 MolWeight:370 RetIndex:1833

CompName:Protocatechuic acid-3TMS ; 3,4-dihydroxybenzoic acid

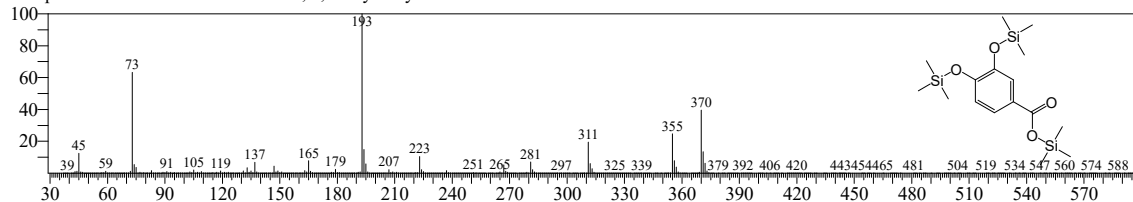

# TNAU

<< Target >>

Line#9 R.Time:30.420(Scan#:5185) MassPeaks:309

RawMode:Averaged 30.415-30.425(5184-5186) BasePeak:207.05(1660)

BG Mode:Calc. from Peak Group 1 - Event 1 Q3 Scan

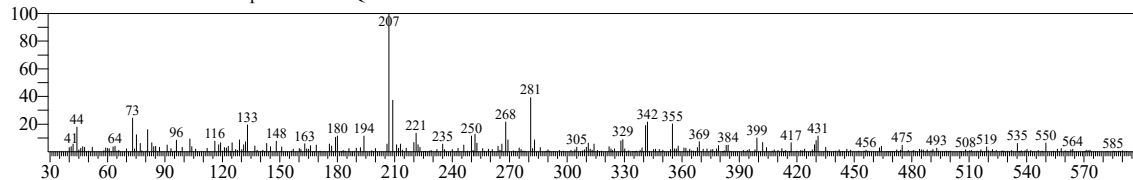

Hit#1 Entry:294 Library:OA\_TMS\_DB5\_67min\_V3.lib

SI:37 Formula:C15H26O4Si2 CAS:306-08-1 MolWeight:326 RetIndex:1782

CompName:Homovanillic acid-2TMS ; 2-(4-hydroxy-3-methoxyphenyl)acetic acid

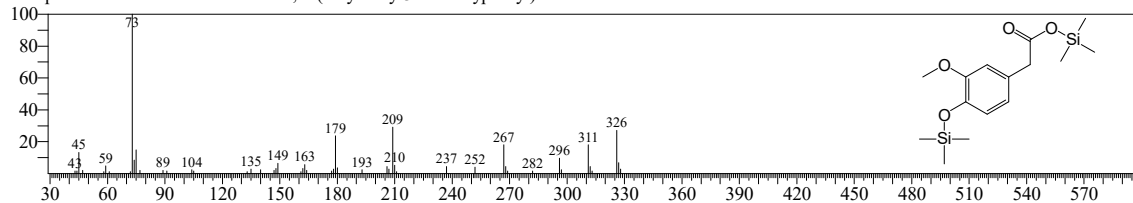

Hit#2 Entry:332 Library:OA\_TMS\_DB5\_67min\_V3.lib

SI:34 Formula:C17H32O4Si3 CAS:451-13-8 MolWeight:384 RetIndex:1850

CompName:Homogentisic acid-3TMS ; 2-(2,5-dihydroxyphenyl)acetic acid

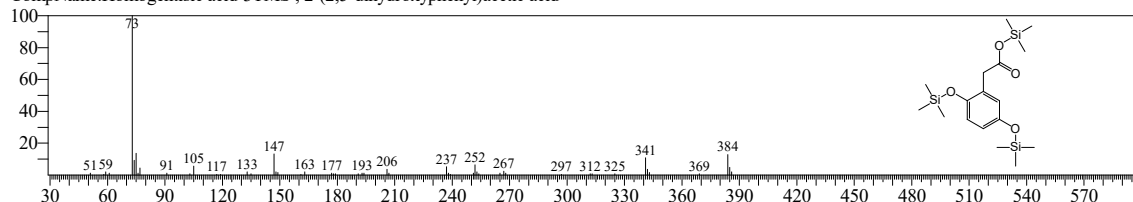

Hit#3 Entry:368 Library:OA\_TMS\_DB5\_67min\_V3.lib

SI:34 Formula:C17H35NO2Si3 CAS:1196-92-5 MolWeight:369 RetIndex:1899

CompName:Vanillylamine-3TMS ; 4-(aminomethyl)-2-methoxyphenol

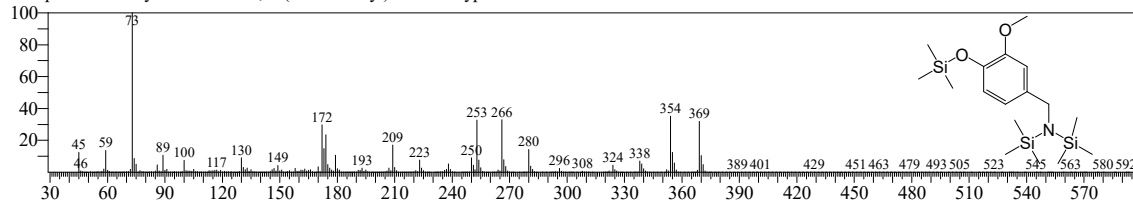

Hit#4 Entry:343 Library:OA\_TMS\_DB5\_67min\_V3.lib

SI:34 Formula:C18H37NO3Si3 CAS:51-43-4 MolWeight:399 RetIndex:1868

CompName:Epinephrine-3TMS ; 4-[(1R)-1-hydroxy-2-(methylamino)ethyl]benzene-1,2-diol

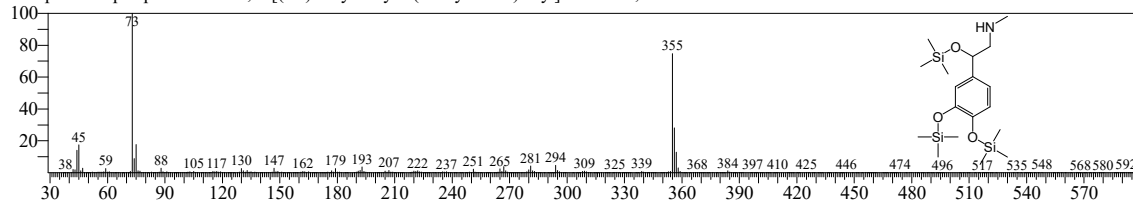

Hit#5 Entry:402 Library:OA\_TMS\_DB5\_67min\_V3.lib

SI:33 Formula:C20H42O4Si4 CAS:775-01-9 MolWeight:458 RetIndex:1942

CompName:3,4-Dihydroxymandelic acid-4TMS ; 2-(3,4-dihydroxyphenyl)-2-hydroxyacetic acid

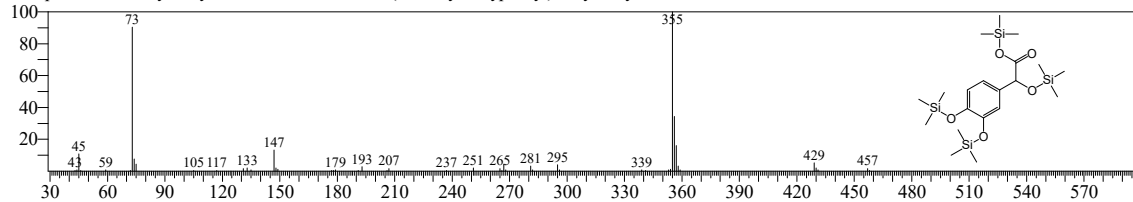

# TNAU

<< Target >>

Line#:10 R.Time:30.740(Scan#:5249) MassPeaks:300

RawMode:Averaged 30.735-30.745(5248-5250) BasePeak:207.00(1220)

BG Mode:Calc. from Peak Group 1 - Event 1 Q3 Scan

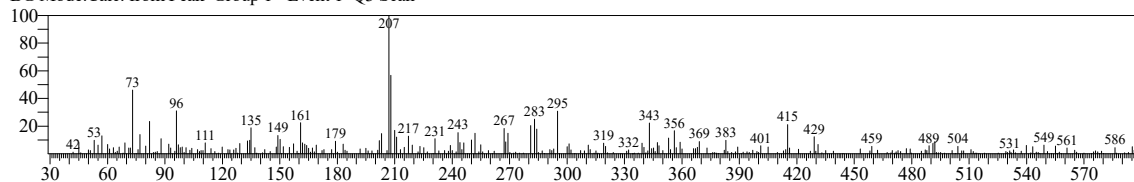

Hit#:1 Entry:384 Library:OA\_TMS\_DB5\_67min\_V3.lib

SI:33 Formula:C17H35NO3Si3 CAS:65-23-6 MolWeight:385 RetIndex:1919

CompName:Pyridoxine-3TMS ; 4,5-bis(hydroxymethyl)-2-methylpyridin-3-ol

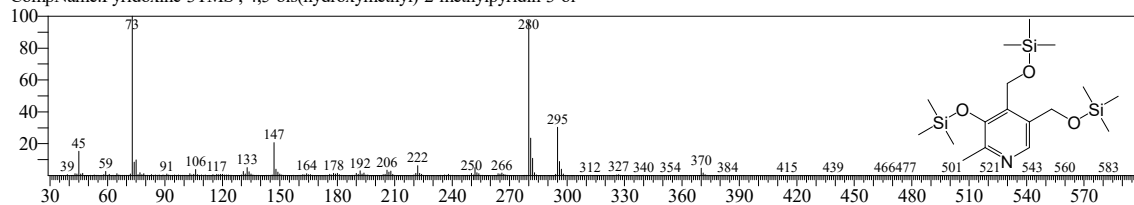

Hit#:2 Entry:294 Library:OA\_TMS\_DB5\_67min\_V3.lib

SI:31 Formula:C15H26O4Si2 CAS:306-08-1 MolWeight:326 RetIndex:1782

CompName:Homovanillic acid-2TMS ; 2-(4-hydroxy-3-methoxyphenyl)acetic acid

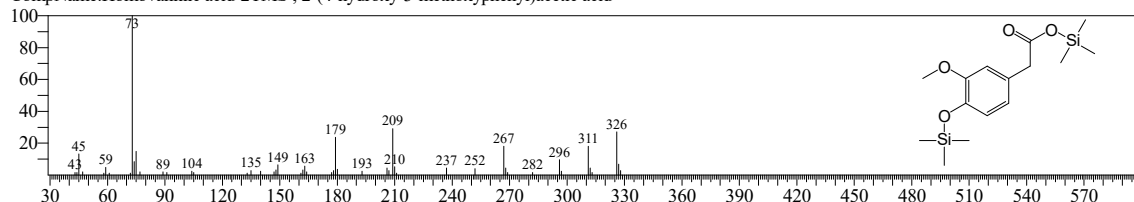

Hit#:3 Entry:211 Library:OA\_TMS\_DB5\_67min\_V3.lib

SI:31 Formula:C13H22O3Si2 CAS:99-96-7 MolWeight:282 RetIndex:1636

CompName:4-Hydroxybenzoic acid-2TMS ; 4-hydroxybenzoic acid

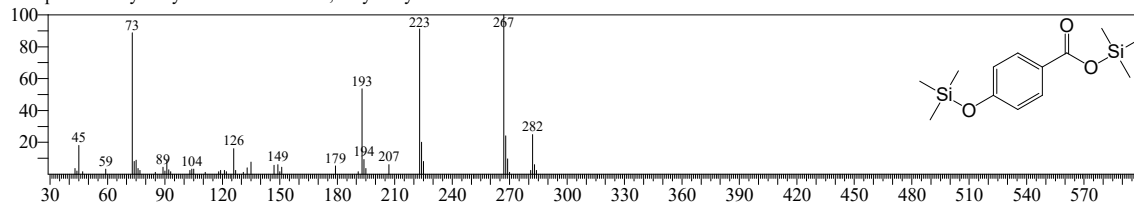

Hit#:4 Entry:179 Library:OA\_TMS\_DB5\_67min\_V3.lib

SI:31 Formula:C13H22O3Si2 CAS:99-06-9 MolWeight:282 RetIndex:1572

CompName:3-Hydroxybenzoic acid-2TMS ; 3-hydroxybenzoic acid

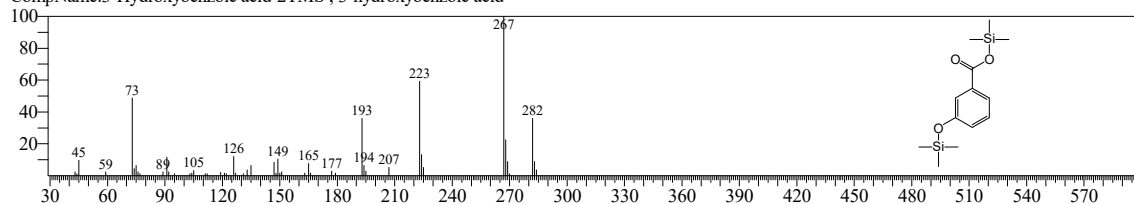

Hit#:5 Entry:197 Library:OA\_TMS\_DB5\_67min\_V3.lib

SI:30 Formula:C12H29O6PSi3 CAS:138-08-9 MolWeight:384 RetIndex:1611

CompName:Phosphoenolpyruvic acid-3TMS ; 2-phosphonooxyprop-2-enoic acid

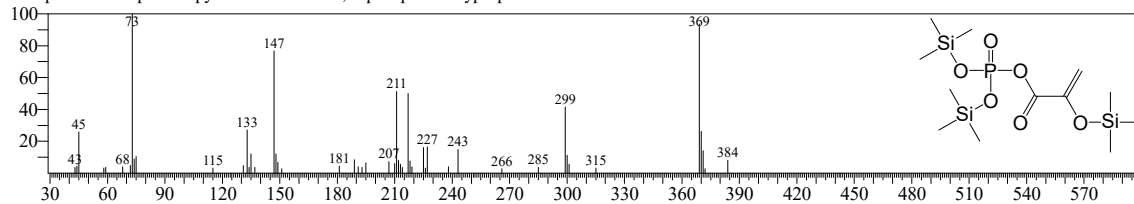

# TNAU

<< Target >>

Line#:11 R.Time:31.100(Scan#:5321) MassPeaks:288

RawMode:Averaged 31.095-31.105(5320-5322) BasePeak:281.00(1643)

BG Mode:Calc. from Peak Group 1 - Event 1 Q3 Scan

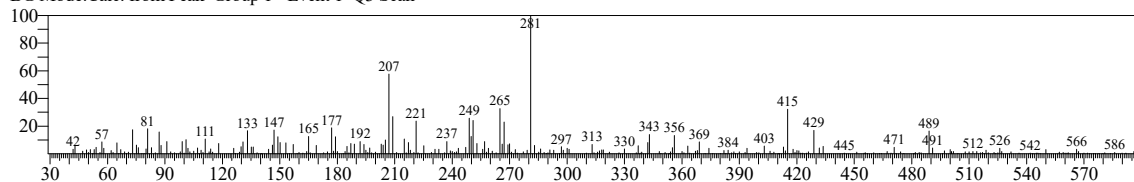

Hit#:1 Entry:203 Library:OA\_TMS\_DB5\_67min\_V3.lib

SI:35 Formula:C13H23NO2Si2 CAS:118-92-3 MolWeight:281 RetIndex:1623

CompName:Anthranilic acid-2TMS ; 2-aminobenzoic acid

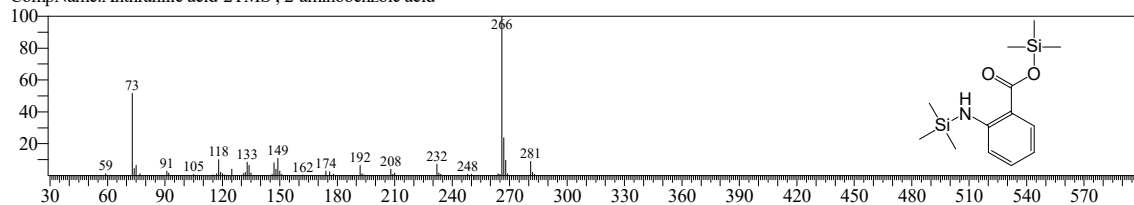

Hit#:2 Entry:328 Library:OA\_TMS\_DB5\_67min\_V3.lib

SI:33 Formula:C13H23NO2Si2 CAS:150-13-0 MolWeight:281 RetIndex:1845

CompName:4-Aminobenzoic acid-2TMS ; 4-aminobenzoic acid

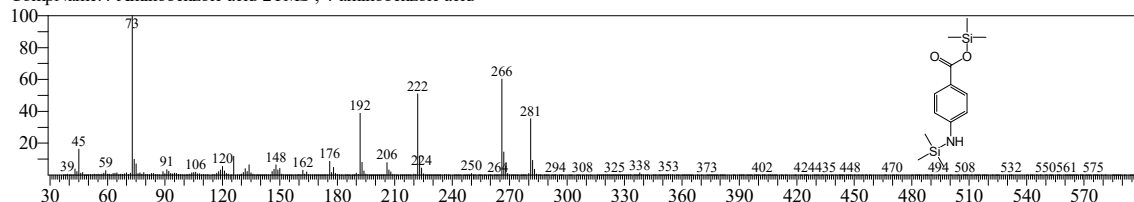

Hit#:3 Entry:341 Library:OA\_TMS\_DB5\_67min\_V3.lib

SI:33 Formula:C18H34O4Si3 CAS:3247-75-4 MolWeight:398 RetIndex:1864

CompName:3-(3-Hydroxyphenyl)-3-hydroxypropionic acid-3TMS ; 3-hydroxy-3-(3-hydroxyphenyl)propanoic acid

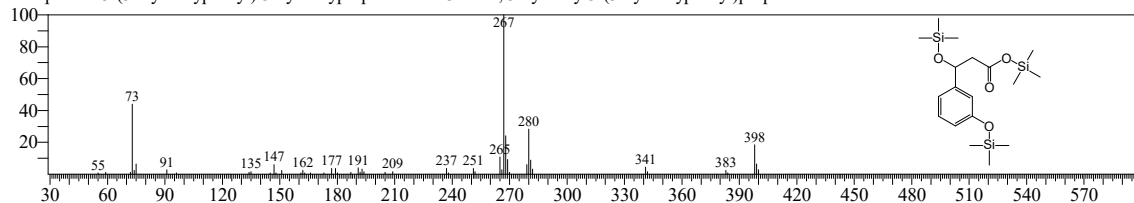

Hit#:4 Entry:368 Library:OA\_TMS\_DB5\_67min\_V3.lib

SI:32 Formula:C17H35NO2Si3 CAS:1196-92-5 MolWeight:369 RetIndex:1899

CompName:Vanillylamine-3TMS ; 4-(aminomethyl)-2-methoxyphenol

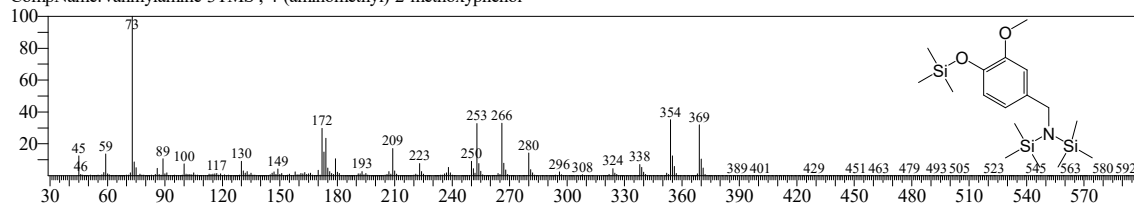

Hit#:5 Entry:310 Library:OA\_TMS\_DB5\_67min\_V3.lib

SI:32 Formula:C11H20N4OSi2 CAS:68-94-0 MolWeight:280 RetIndex:1822

CompName:Hypoxanthine-2TMS ; 3,7-dihydropurin-6-one

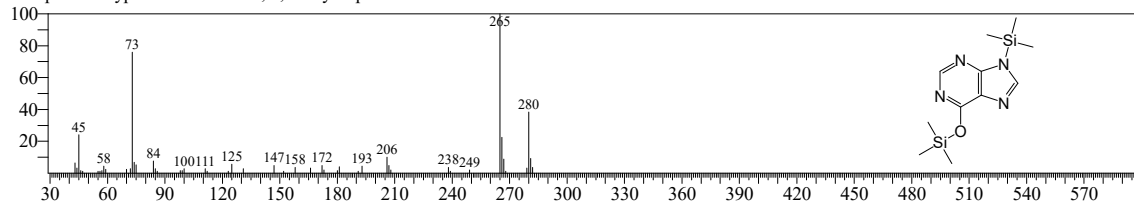

# TNAU

<< Target >>

Line#:12 R.Time:31.905(Scan#:5482) MassPeaks:373

RawMode:Averaged 31.900-31.910(5481-5483) BasePeak:139.10(1284)

BG Mode:Calc. from Peak Group 1 - Event 1 Q3 Scan

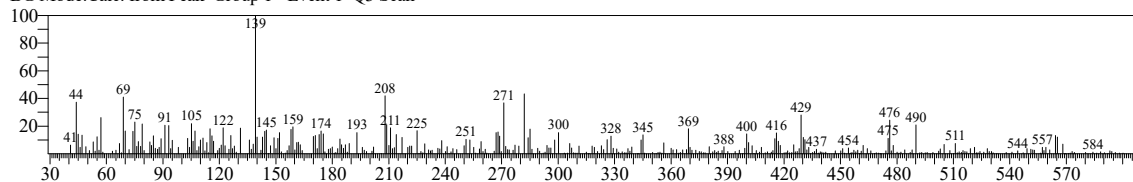

Hit#:1 Entry:211 Library:OA\_TMS\_DB5\_67min\_V3.lib

SI:29 Formula:C13H22O3Si2 CAS:99-96-7 MolWeight:282 RetIndex:1636

CompName:4-Hydroxybenzoic acid-2TMS ; 4-hydroxybenzoic acid

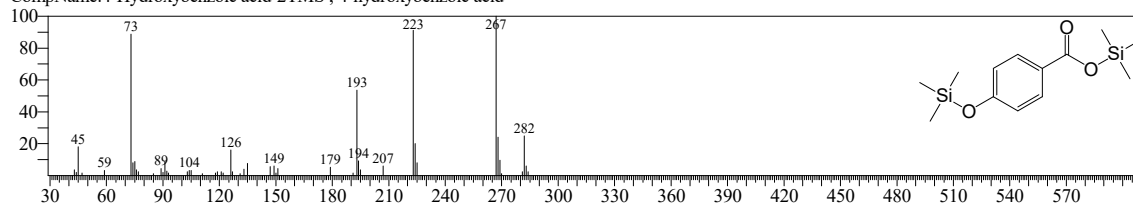

Hit#:2 Entry:179 Library:OA\_TMS\_DB5\_67min\_V3.lib

SI:28 Formula:C13H22O3Si2 CAS:99-06-9 MolWeight:282 RetIndex:1572

CompName:3-Hydroxybenzoic acid-2TMS ; 3-hydroxybenzoic acid

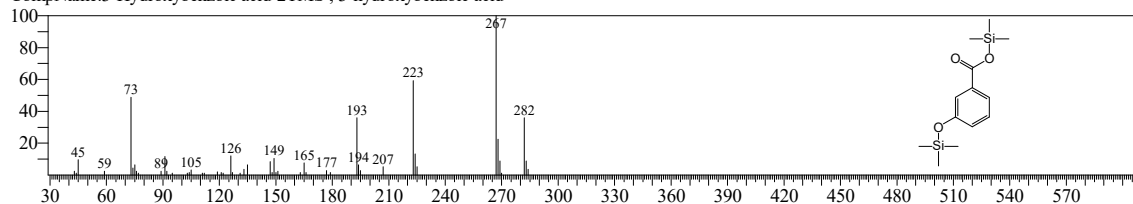

Hit#:3 Entry:534 Library:OA\_TMS\_DB5\_67min\_V3.lib

SI:28 Formula:C25H42O2Si CAS:24880-45-3 MolWeight:402 RetIndex:2591

CompName:Docosapentaenoic acid-TMS ; (7Z,10Z,13Z,16Z,19Z)-docosa-7,10,13,16,19-pentaenoic acid

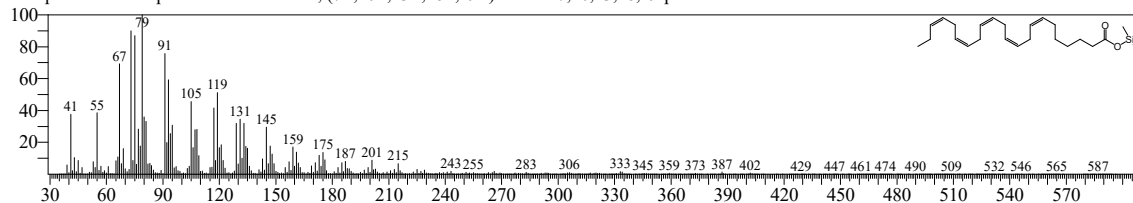

Hit#:4 Entry:513 Library:OA\_TMS\_DB5\_67min\_V3.lib

SI:28 Formula:C21H43NO2Si CAS:301-02-0 MolWeight:353 RetIndex:2423

CompName:Oleamide-TMS ; (Z)-octadec-9-enamide

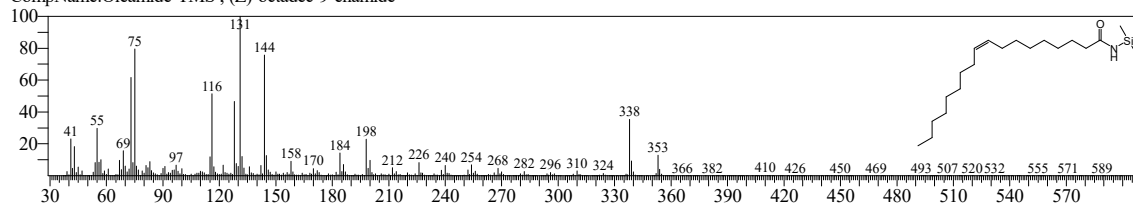

Hit#:5 Entry:509 Library:OA\_TMS\_DB5\_67min\_V3.lib

SI:27 Formula:C23H38O2Si CAS:10417-94-4 MolWeight:374 RetIndex:2389

CompName:Eicosapentaenoic acid-TMS ; icoso-5,8,11,14,17-pentaenoic acid

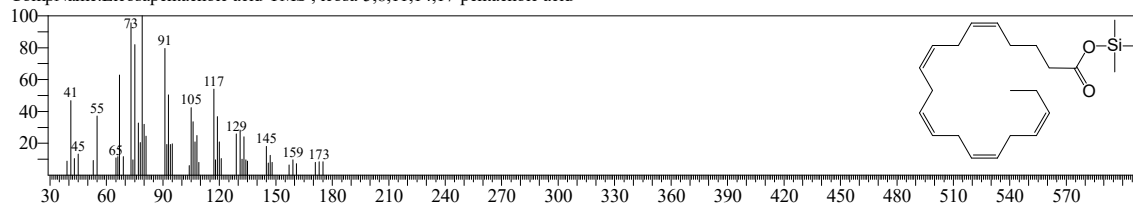

# TNAU

<< Target >>

Line#:13 R.Time:32.420(Scan#:5585) MassPeaks:289

RawMode:Averaged 32.415-32.425(5584-5586) BasePeak:191.00(576)

BG Mode:Calc. from Peak Group 1 - Event 1 Q3 Scan

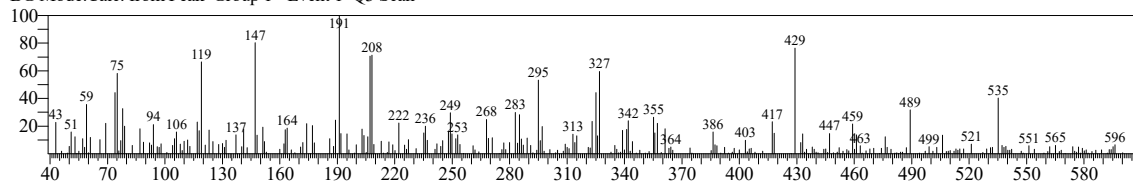

Hit#:1 Entry:35 Library:OA\_TMS\_DB5\_67min\_V3.lib

SI:28 Formula:C10H24O3Si2 CAS:300-85-6 MolWeight:248 RetIndex:1161

CompName:3-Hydroxybutyric acid-2TMS ; 3-hydroxybutanoic acid

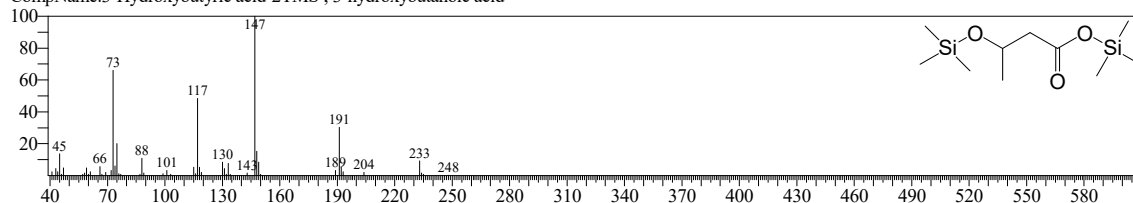

Hit#:2 Entry:9 Library:OA\_TMS\_DB5\_67min\_V3.lib

SI:26 Formula: CAS:0-00-0 MolWeight:237 RetIndex:1062

CompName:Lactic acid-13C3-2TMS ;

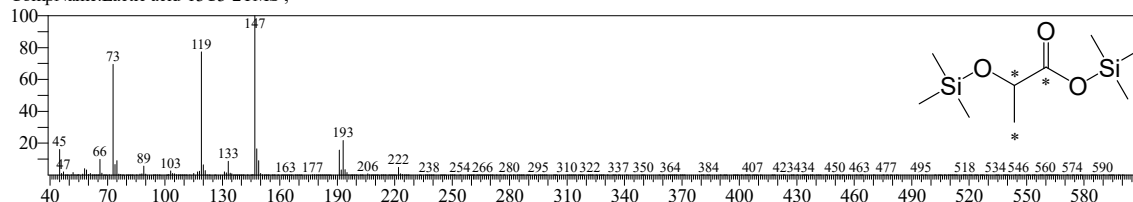

Hit#:3 Entry:402 Library:OA\_TMS\_DB5\_67min\_V3.lib

SI:26 Formula:C20H42O4Si4 CAS:775-01-9 MolWeight:458 RetIndex:1942

CompName:3,4-Dihydroxymandelic acid-4TMS ; 2-(3,4-dihydroxyphenyl)-2-hydroxyacetic acid

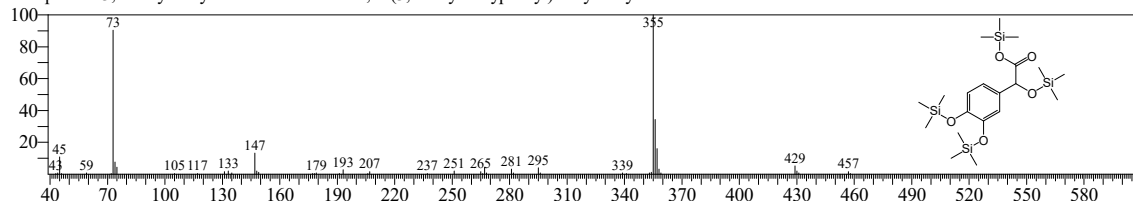

Hit#:4 Entry:45 Library:OA\_TMS\_DB5\_67min\_V3.lib

SI:25 Formula:C11H26O3Si2 CAS:473-86-9 MolWeight:262 RetIndex:1208

CompName:2-Methyl-3-hydroxybutyric acid-2TMS ; 3-hydroxy-2-methylbutanoic acid

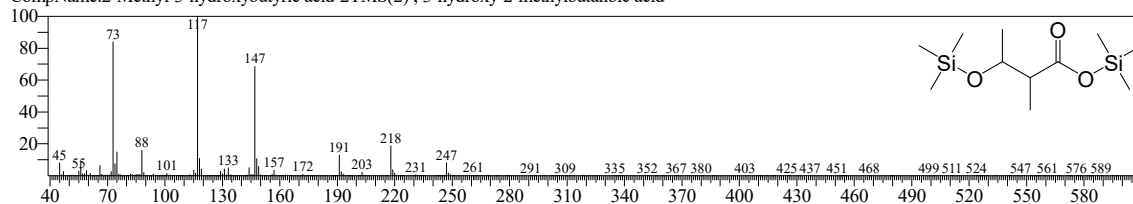

Hit#:5 Entry:58 Library:OA\_TMS\_DB5\_67min\_V3.lib

SI:24 Formula:C11H26O3Si2 CAS:4374-62-3 MolWeight:262 RetIndex:1234

CompName:Ethylhydracrylic acid-2TMS ; 2-(hydroxymethyl)butanoic acid

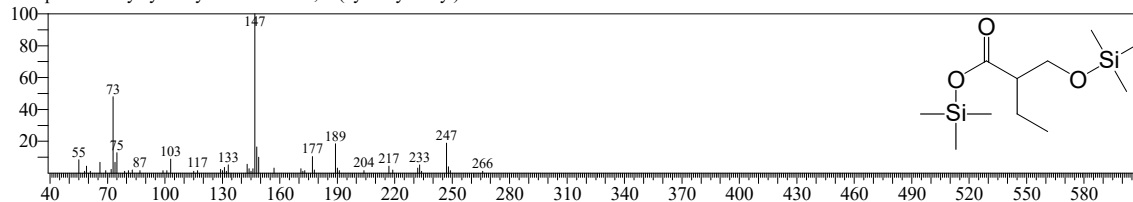

# TNAU

<< Target >>

Line#:14 R.Time:32.615(Scan#:5624) MassPeaks:274

RawMode:Averaged 32.610-32.620(5623-5625) BasePeak:207.05(886)

BG Mode:Calc. from Peak Group 1 - Event 1 Q3 Scan

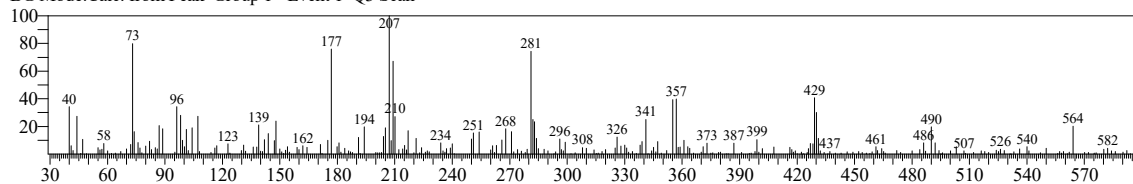

Hit#:1 Entry:402 Library:OA TMS DB5 67min V3.lib

SI:39 Formula:C20H42O4Si4 CAS:775-01-9 MolWeight:458 RetIndex:1942

CompName:3,4-Dihydroxymandelic acid-4TMS ; 2-(3,4-dihydroxyphenyl)-2-hydroxyacetic acid

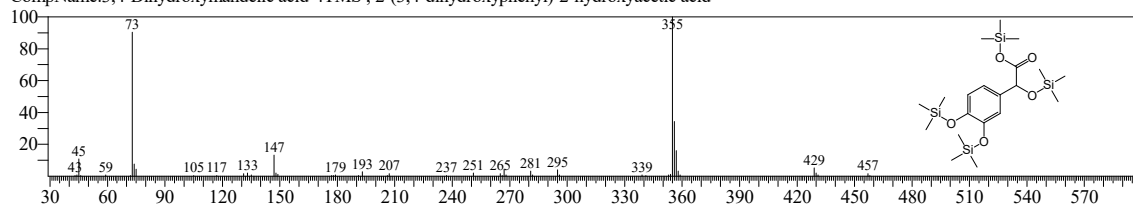

Hit#:2 Entry:343 Library:OA TMS DB5 67min V3.lib

SI:35 Formula:C18H37NO3Si3 CAS:51-43-4 MolWeight:399 RetIndex:1868

CompName:Epinephrine-3TMS ; 4-[(1R)-1-hydroxy-2-(methylamino)ethyl]benzene-1,2-diol

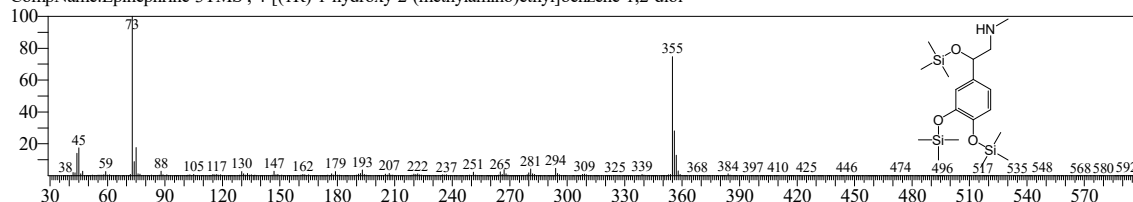

Hit#:3 Entry:294 Library:OA TMS DB5 67min V3.lib

SI:32 Formula:C15H26O4Si2 CAS:306-08-1 MolWeight:326 RetIndex:1782

CompName:Homovanillic acid-2TMS ; 2-(4-hydroxy-3-methoxyphenyl)acetic acid

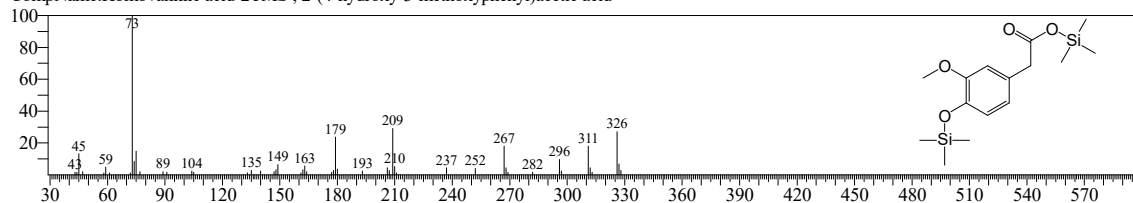

Hit#:4 Entry:328 Library:OA TMS DB5 67min V3.lib

SI:31 Formula:C13H23NO2Si2 CAS:150-13-0 MolWeight:281 RetIndex:1845

CompName:4-Aminobenzoic acid-2TMS ; 4-aminobenzoic acid

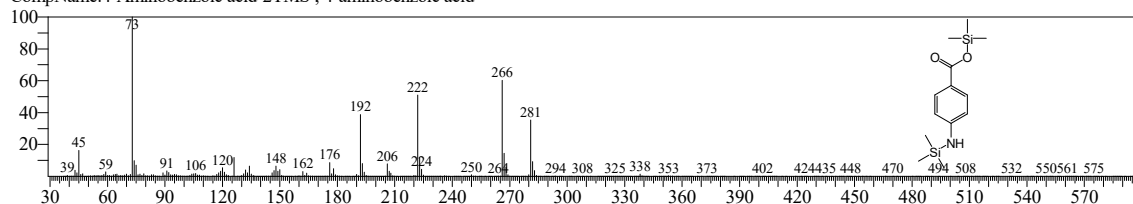

Hit#:5 Entry:368 Library:OA TMS DB5 67min V3.lib

SI:30 Formula:C17H35NO2Si3 CAS:1196-92-5 MolWeight:369 RetIndex:1899

CompName:Vanillylamine-3TMS ; 4-(aminomethyl)-2-methoxyphenol

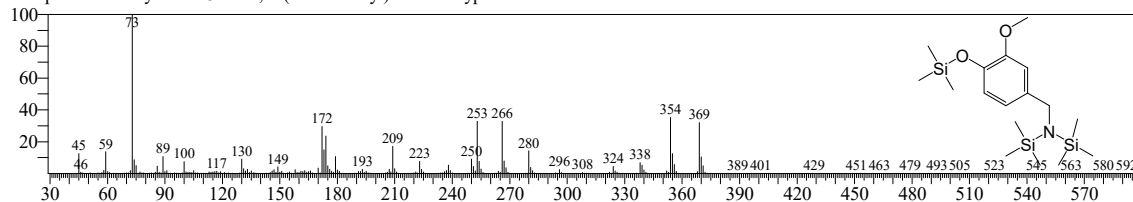

Supplement: Supplementary file 36 [file supplementary]
