# Supplementary material for: Comparative Metabolomics Profiling Reveals Key Metabolites and Associated Pathways Regulating Tuber Dormancy in White Yam (<em>Dioscorea rotundata</em>)
Source: Preprints.org preprint supplement (doi:10.20944/preprints202303.0378.v1), 2023-03-21

# TNAU

## Sample Information

Analyzed by : Admin  
 Analyzed : 05-Aug-22 9:08:34 AM  
 Sample Type : Unknown  
 Level # : 1  
 Sample Name : T56-2  
 Sample ID : T56-2  
 IS Amount : [1]=1  
 Sample Amount : 1  
 Dilution Factor : 1  
 Vial # : 25  
 Injection Volume : 1.00  
 Data File : D:\GCMS-8040NX\Aug 2022\Users\04.08.2022\Data files\04082022-026.qgd  
 Org Data File : D:\GCMS-8040NX\Aug 2022\Users\04.08.2022\Data files\04082022-026.qgd  
 Method File : D:\GCMS-8040NX\Aug 2022\Users\04.08.2022\Method file\27072022\_methodfile.qgm  
 Org Method File : D:\GCMS-8040NX\Aug 2022\Users\04.08.2022\Method file\27072022\_methodfile.qgm  
 Report File :  
 Tuning File : D:\GCMS-8040NX\Aug 2022\Tuning Data\TUNING 04082022.qgt  
 [Comment]  
 Jerry samples  
 Modified by : Admin  
 Modified : 05-Aug-22 4:44:14 PM

Chromatogram T56-2 D:\GCMS-8040NX\Aug 2022\Users\04.08.2022\Data files\04082022-026.qgd

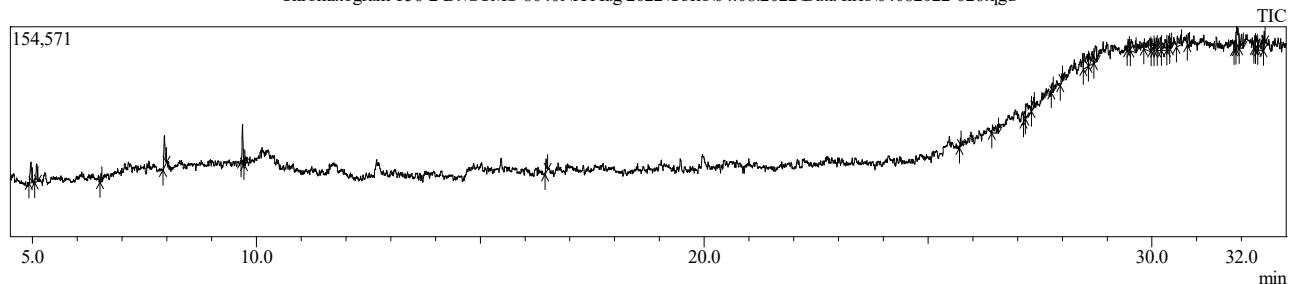

Peak Report TIC

| Peak# | R.Time | Area  | Area% | Height | Height% | A/H  | Similarity | Name                                          |
|-------|--------|-------|-------|--------|---------|------|------------|-----------------------------------------------|
| 1     | 4.964  | 33057 | 3.71  | 15290  | 4.36    | 2.16 | 75         | 2-Propanol, 1,1'-oxybis-                      |
| 2     | 5.092  | 26694 | 3.00  | 13150  | 3.75    | 2.03 | 50         | 2-Hydroxyisocaproic acid-2TMS                 |
| 3     | 6.529  | 7682  | 0.86  | 6484   | 1.85    | 1.18 | 34         | 3-Hydroxybenzoic acid-2TMS                    |
| 4     | 7.943  | 45002 | 5.05  | 23304  | 6.64    | 1.93 | 88         | Undecane                                      |
| 5     | 9.689  | 45756 | 5.13  | 28529  | 8.13    | 1.60 | 90         | Undecane                                      |
| 6     | 9.730  | 3391  | 0.38  | 4747   | 1.35    | 0.71 | 35         | 3-Hydroxybenzoic acid-2TMS                    |
| 7     | 16.467 | 15725 | 1.76  | 9948   | 2.84    | 1.58 | 72         | 2,2,4-Trimethyl-1,3-pentanediol diisobutyrate |
| 8     | 25.723 | 6531  | 0.73  | 6289   | 1.79    | 1.04 | 28         | Metoprolol-TMS                                |
| 9     | 26.440 | 27813 | 3.12  | 6007   | 1.71    | 4.63 | 35         | Stearic acid-TMS                              |
| 10    | 27.145 | 13169 | 1.48  | 5687   | 1.62    | 2.32 | 36         | 3,4-Dihydroxymandelic acid-4TMS               |
| 11    | 27.185 | 49272 | 5.53  | 9448   | 2.69    | 5.22 | 34         | Xylose-4TMS(1)                                |
| 12    | 27.363 | 19562 | 2.20  | 7889   | 2.25    | 2.48 | 26         | 3,4-Dihydroxymandelic acid-4TMS               |
| 13    | 27.776 | 11735 | 1.32  | 7049   | 2.01    | 1.66 | 28         | 3-Hydroxybenzoic acid-2TMS                    |
| 14    | 27.987 | 8966  | 1.01  | 6365   | 1.81    | 1.41 | 30         | 3-Hydroxybenzoic acid-2TMS                    |
| 15    | 28.480 | 49277 | 5.53  | 11373  | 3.24    | 4.33 | 31         | 4-Hydroxyphenyllactic acid-3TMS               |
| 16    | 28.595 | 42442 | 4.76  | 9495   | 2.71    | 4.47 | 37         | 3,4-Dihydroxymandelic acid-4TMS               |
| 17    | 28.737 | 36062 | 4.05  | 12173  | 3.47    | 2.96 | 32         | 3-Hydroxybenzoic acid-2TMS                    |
| 18    | 29.470 | 11852 | 1.33  | 8555   | 2.44    | 1.39 | 37         | Homovanillic acid-2TMS                        |
| 19    | 29.537 | 41340 | 4.64  | 8507   | 2.43    | 4.86 | 32         | Shikimic acid-4TMS                            |
| 20    | 29.950 | 46964 | 5.27  | 9505   | 2.71    | 4.94 | 40         | Galactose-5TMS(2)                             |
| 21    | 29.995 | 20229 | 2.27  | 8435   | 2.40    | 2.40 | 28         | 3,4-Dihydroxymandelic acid-4TMS               |
| 22    | 30.098 | 23016 | 2.58  | 9157   | 2.61    | 2.51 | 28         | Protocatechuic acid-3TMS                      |

# TNAU

| Peak# | R.Time | Area   | Area%  | Height | Height% | A/H  | Similarity | Name                                        |
|-------|--------|--------|--------|--------|---------|------|------------|---------------------------------------------|
| 23    | 30.190 | 29704  | 3.33   | 9411   | 2.68    | 3.16 | 48         | Epinephrine-3TMS                            |
| 24    | 30.292 | 32372  | 3.63   | 7778   | 2.22    | 4.16 | 42         | Epinephrine-3TMS                            |
| 25    | 30.375 | 20770  | 2.33   | 9688   | 2.76    | 2.14 | 44         | Rhamnose-4TMS(1)                            |
| 26    | 30.415 | 7861   | 0.88   | 7520   | 2.14    | 1.05 | 43         | Epinephrine-3TMS                            |
| 27    | 30.644 | 24256  | 2.72   | 7489   | 2.13    | 3.24 | 23         | 3-Hydroxy-kynurenine-3TMS                   |
| 28    | 30.812 | 14423  | 1.62   | 9208   | 2.62    | 1.57 | 44         | 4-Aminobenzoic acid-2TMS                    |
| 29    | 31.850 | 13902  | 1.56   | 5725   | 1.63    | 2.43 | 28         | Octadecanol-TMS                             |
| 30    | 31.897 | 53808  | 6.04   | 16258  | 4.63    | 3.31 | 27         | Cholesterol-TMS                             |
| 31    | 31.999 | 25855  | 2.90   | 10112  | 2.88    | 2.56 | 34         | 3-(3-Hydroxyphenyl)-3-hydroxypropionic acid |
| 32    | 32.298 | 13224  | 1.48   | 9294   | 2.65    | 1.42 | 33         | Anthranilic acid-2TMS                       |
| 33    | 32.350 | 17755  | 1.99   | 8115   | 2.31    | 2.19 | 29         | 3-Hydroxybenzoic acid-2TMS                  |
| 34    | 32.469 | 39608  | 4.45   | 11566  | 3.30    | 3.42 | 33         | Protocatechuic acid-3TMS                    |
| 35    | 32.508 | 11993  | 1.35   | 11238  | 3.20    | 1.07 | 42         | 3,4-Dihydroxymandelic acid-4TMS             |
|       |        | 891068 | 100.00 | 350788 | 100.00  |      |            |                                             |

## Library

<< Target >>

Line#:1 R.Time:4.965(Scan#:94) MassPeaks:307

RawMode:Averaged 4.960-4.970(93-95) BasePeak:89.05(3574)

BG Mode:Calc. from Peak Group 1 - Event 1 Q3 Scan

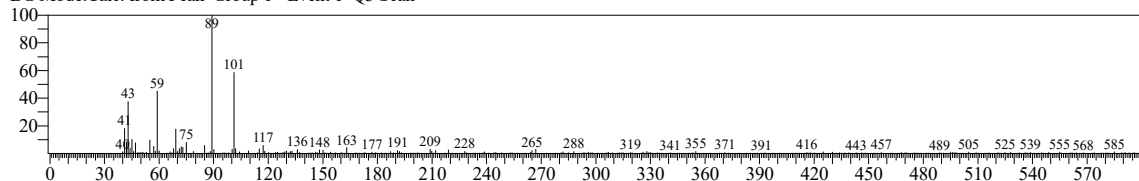

Hit#:1 Entry:7425 Library:NIST20R.lib

SI:75 Formula:C6H14O3 CAS:110-98-5 MolWeight:134 RetIndex:1018

CompName:2-Propanol, 1,1'-oxybis- \$2-Propanol, 1,1'-oxydi- \$Bis(2-hydroxypropyl) ether \$1,1'-Oxydi-2-propanol \$2,2'-Dihydroxydipropyl ether \$

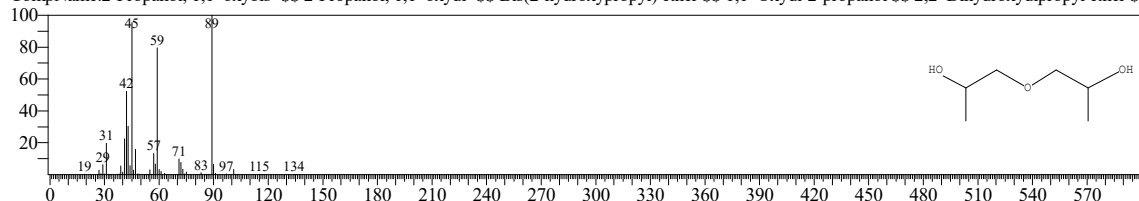

Hit#:2 Entry:9263 Library:NIST20M1.lib

SI:74 Formula:C6H12O3 CAS:21983-72-2 MolWeight:132 RetIndex:821

CompName:3,3-Dimethoxy-2-butanone

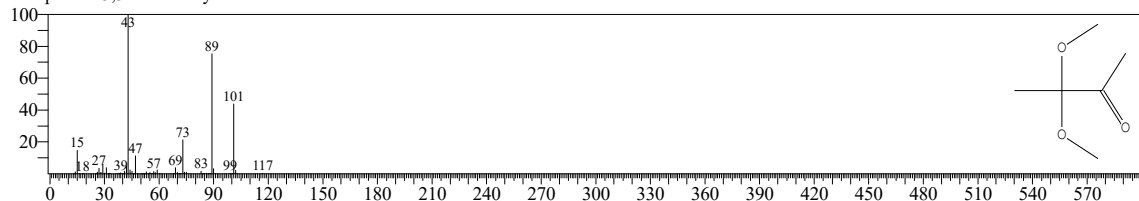

Hit#:3 Entry:9281 Library:NIST20M1.lib

SI:73 Formula:C6H16OSi CAS:18173-63-2 MolWeight:132 RetIndex:604

CompName:Silane, (2-methoxyethyl)trimethyl- \$\$(2-Methoxyethyl)(trimethyl)silane #

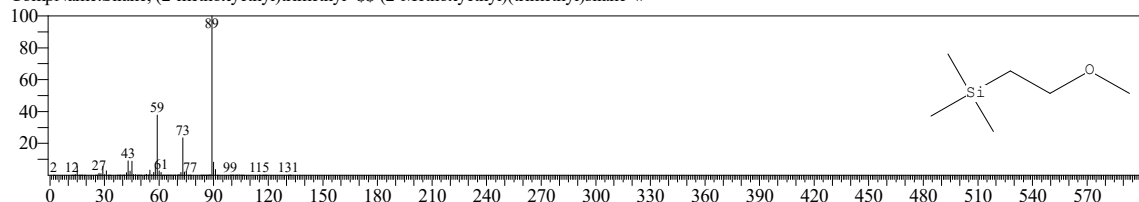

# TNAU

<< Target >>

Line#:1 R.Time:4.965(Scan#:94) MassPeaks:307

RawMode:Averaged 4.960-4.970(93-95) BasePeak:89.05(3574)

BG Mode:Calc. from Peak Group 1 - Event 1 Q3 Scan

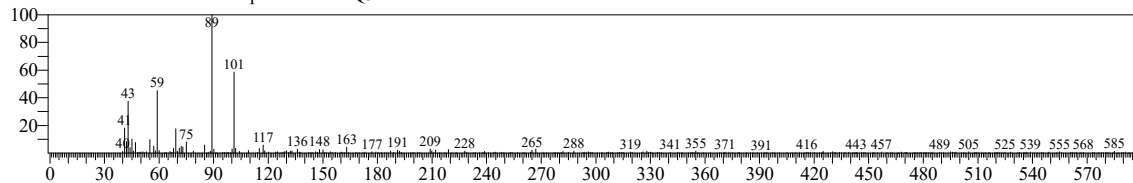

Hit#:4 Entry:8599 Library:NIST20M1.lib

SI:73 Formula:C6H14OSi CAS:30535-30-9 MolWeight:130 RetIndex:594

CompName:Allyl(methoxy)dimethylsilane \$\$ Allyl(dimethyl)silyl methyl ether #

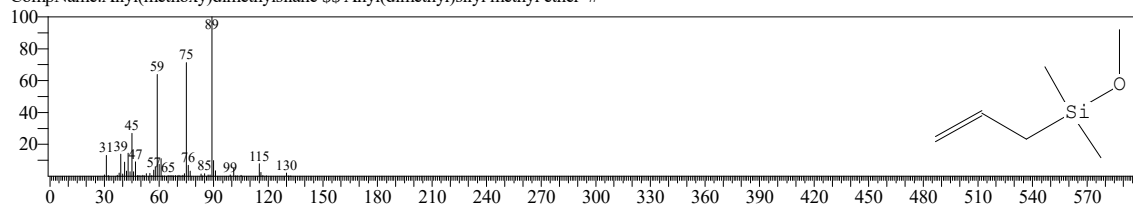

Hit#:5 Entry:9789 Library:NIST20M1.lib

SI:73 Formula:C6H14O3 CAS:0-00-0 MolWeight:134 RetIndex:1018

CompName:Dipropylene glycol (isomer 1) \$\$ 2-Propanol, 1,1'-oxybis-

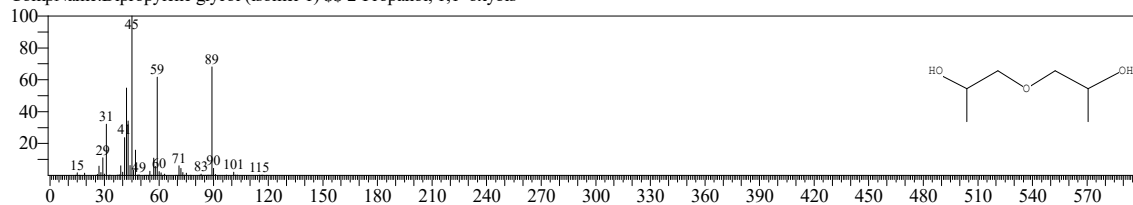

# TNAU

<< Target >>

Line#:2 R.Time:5.090(Scan#:119) MassPeaks:347

RawMode:Averaged 5.085-5.095(118-120) BasePeak:103.10(2676)

BG Mode:Calc. from Peak Group 1 - Event 1 Q3 Scan

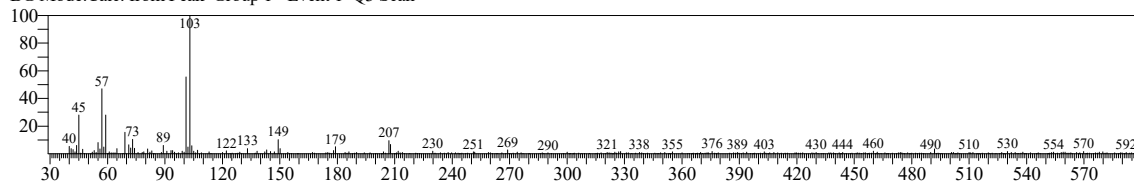

Hit#:1 Entry:62 Library:OA\_TMS\_DB5\_67min\_V3.lib

SI:50 Formula:C12H28O3Si2 CAS:20312-37-2 MolWeight:276 RetIndex:1244

CompName:2-Hydroxyisocaproic acid-2TMS ; (2R)-2-hydroxy-4-methylpentanoic acid

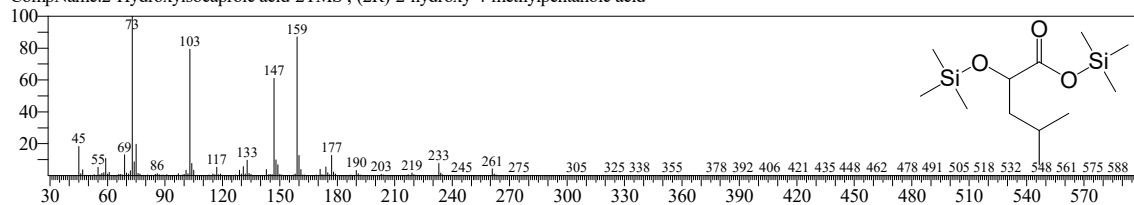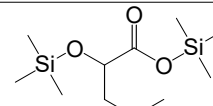

Hit#:2 Entry:514 Library:OA\_TMS\_DB5\_67min\_V3.lib

SI:50 Formula:C16H30N2O5Si2 CAS:50-89-5 MolWeight:386 RetIndex:2428

CompName:Thymidine-2TMS ; 1-[(2R,4S,5R)-4-hydroxy-5-(hydroxymethyl)oxolan-2-yl]-5-methylpyrimidine-2,4-dione

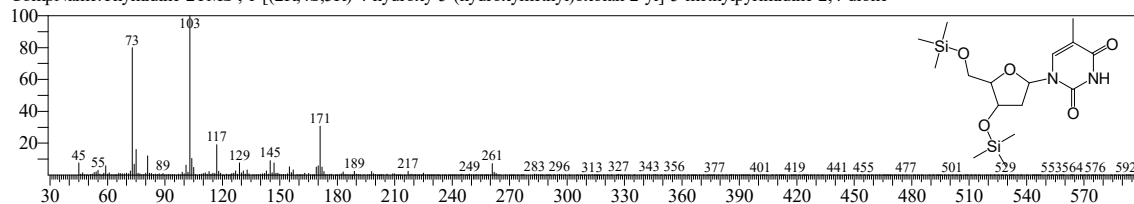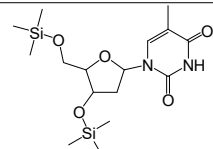

Hit#:3 Entry:57 Library:OA\_TMS\_DB5\_67min\_V3.lib

SI:47 Formula:C9H22O3Si2 CAS:96-26-4 MolWeight:234 RetIndex:1224

CompName:Dihydroxyacetone-2TMS ; 1,3-dihydroxypropan-2-one

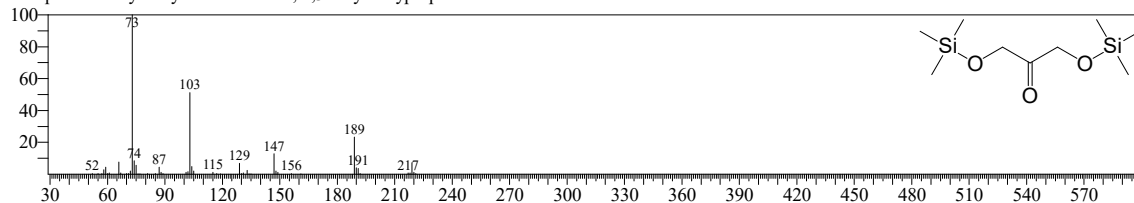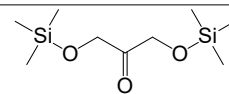

Hit#:4 Entry:39 Library:OA\_TMS\_DB5\_67min\_V3.lib

SI:46 Formula:C10H21NO3Si CAS:816-66-0 MolWeight:231 RetIndex:1181

CompName:2-Ketoisocaproic acid-meto-TMS(1) ; 4-methyl-2-oxopentanoic acid

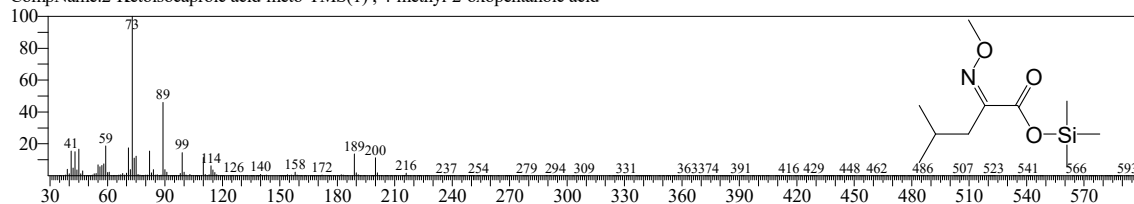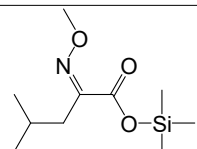

Hit#:5 Entry:19 Library:OA\_TMS\_DB5\_67min\_V3.lib

SI:46 Formula:C8H21NO2Si2 CAS:56-40-6 MolWeight:219 RetIndex:1121

CompName:Glycine-2TMS ; 2-aminoacetic acid

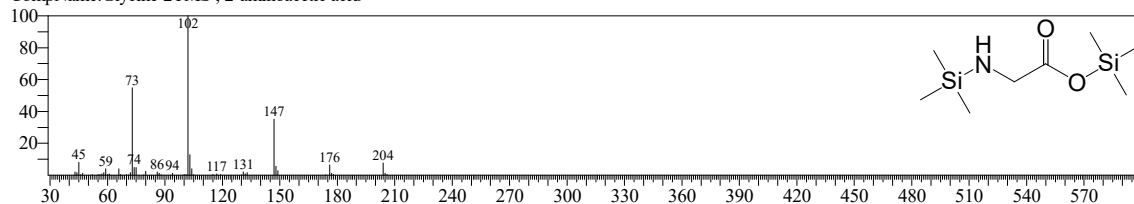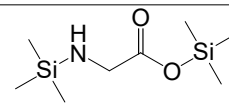

# TNAU

<< Target >>

Line#:3 R.Time:6.530(Scan#:407) MassPeaks:345

RawMode:Averaged 6.525-6.535(406-408) BasePeak:207.00(605)

BG Mode:Calc. from Peak Group 1 - Event 1 Q3 Scan

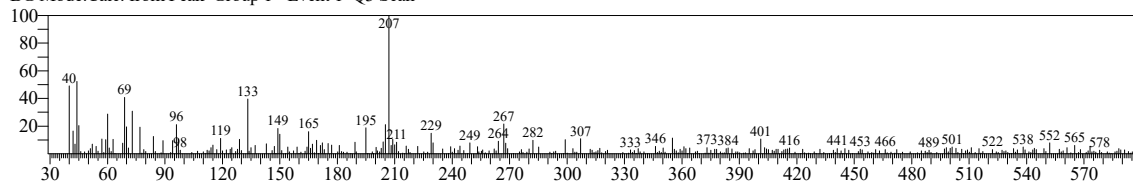

Hit#:1 Entry:179 Library:OA\_TMS\_DB5\_67min\_V3.lib

SI:34 Formula:C13H22O3Si2 CAS:99-06-9 MolWeight:282 RetIndex:1572

CompName:3-Hydroxybenzoic acid-2TMS ; 3-hydroxybenzoic acid

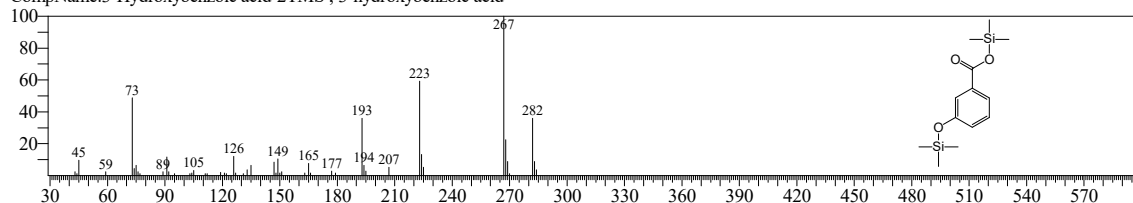

Hit#:2 Entry:539 Library:OA\_TMS\_DB5\_67min\_V3.lib

SI:34 Formula:C27H60O3Si2 CAS:544-62-7 MolWeight:488 RetIndex:2684

CompName:Batyl alcohol-2TMS ; 3-octadecyloxypropane-1,2-diol

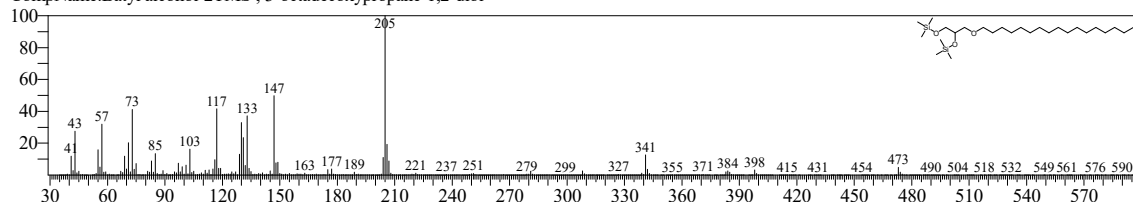

Hit#:3 Entry:343 Library:OA\_TMS\_DB5\_67min\_V3.lib

SI:33 Formula:C18H37NO3Si3 CAS:51-43-4 MolWeight:399 RetIndex:1868

CompName:Epinephrine-3TMS ; 4-[(1R)-1-hydroxy-2-(methylamino)ethyl]benzene-1,2-diol

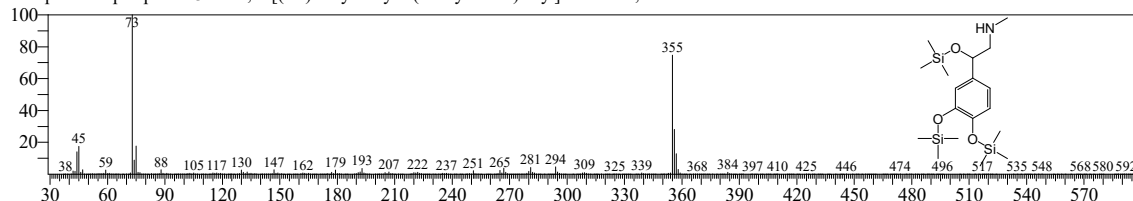

Hit#:4 Entry:211 Library:OA\_TMS\_DB5\_67min\_V3.lib

SI:33 Formula:C13H22O3Si2 CAS:99-96-7 MolWeight:282 RetIndex:1636

CompName:4-Hydroxybenzoic acid-2TMS ; 4-hydroxybenzoic acid

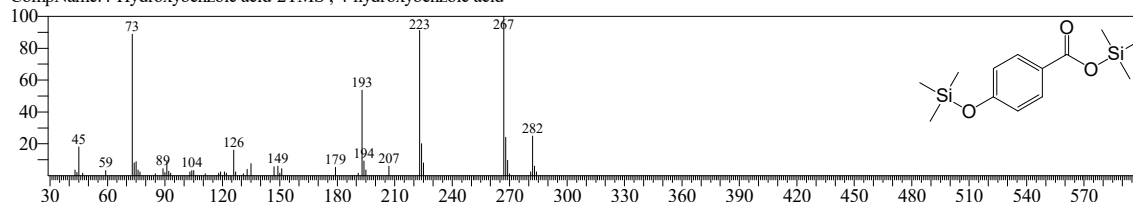

Hit#:5 Entry:548 Library:OA\_TMS\_DB5\_67min\_V3.lib

SI:31 Formula:C17H31N5O3SSi2 CAS:2457-80-9 MolWeight:441 RetIndex:2787

CompName:5'-Methylthioadenosine-2TMS ; (2R,3R,4S,5S)-2-(6-aminopurin-9-yl)-5-(methylsulfanylmethyl)oxolane-3,4-diol

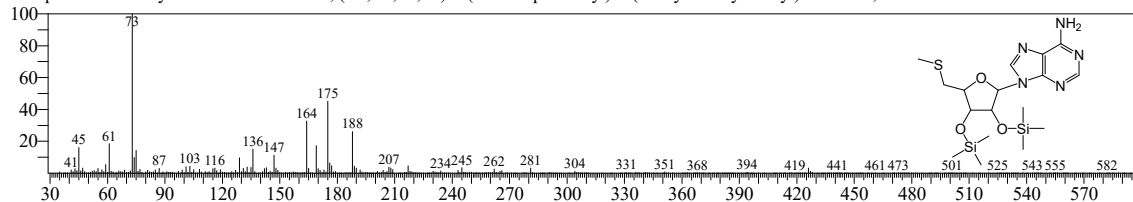

# TNAU

<< Target >>

Line#:4 R.Time:7.945(Scan#:690) MassPeaks:278

RawMode:Averaged 7.940-7.950(689-691) BasePeak:57.10(5254)

BG Mode:Calc. from Peak Group 1 - Event 1 Q3 Scan

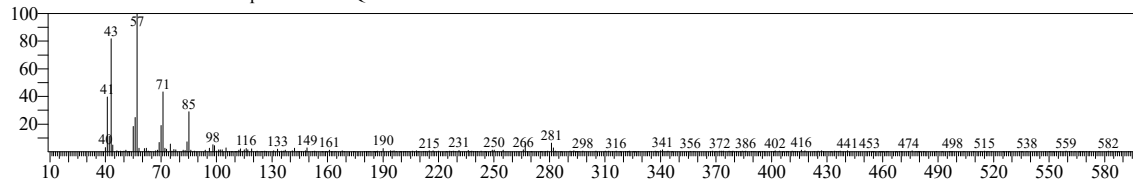

Hit#:1 Entry:12897 Library:NIST20R.lib

SI:88 Formula:C<sub>11</sub>H<sub>24</sub> CAS:1120-21-4 MolWeight:156 RetIndex:1100

CompName:Undecane \$\$ n-Undecane \$\$ Hendecane \$\$ n-C<sub>11</sub>H<sub>24</sub> \$\$ UN 2330

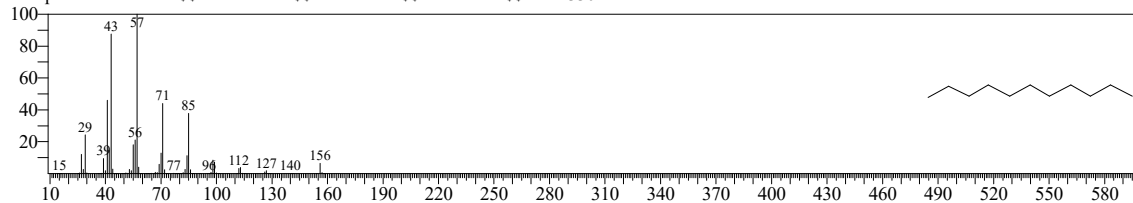

Hit#:2 Entry:13604 Library:NIST20M1.lib

SI:88 Formula:C<sub>10</sub>H<sub>22</sub> CAS:124-18-5 MolWeight:142 RetIndex:1000

CompName:Decane \$\$ n-Decane \$\$ n-C<sub>10</sub>H<sub>22</sub> \$\$ UN 2247

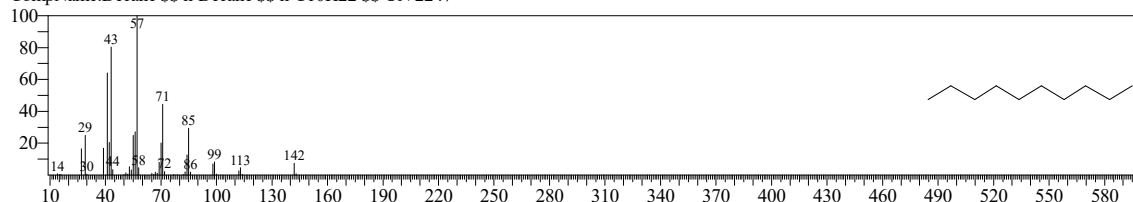

Hit#:3 Entry:40226 Library:NIST20M1.lib

SI:88 Formula:C<sub>13</sub>H<sub>28</sub> CAS:629-50-5 MolWeight:184 RetIndex:1300

CompName:Tridecane \$\$ n-Tridecane \$\$ Tridecane, n-

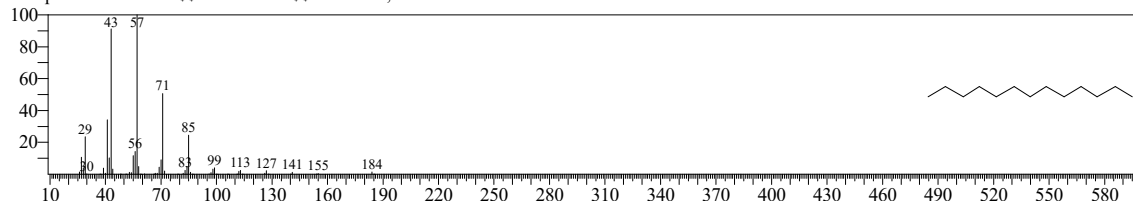

Hit#:4 Entry:30057 Library:NIST20M1.lib

SI:87 Formula:C<sub>12</sub>H<sub>26</sub> CAS:112-40-3 MolWeight:170 RetIndex:1200

CompName:Dodecane \$\$ n-Dodecane \$\$ Adakane 12 \$\$ Ba 51-090453 \$\$ CH<sub>3</sub>(CH<sub>2</sub>)<sub>10</sub>CH<sub>3</sub> \$\$ Bihexyl \$\$ Dihexyl \$\$ Duodecane \$\$ NSC 8714

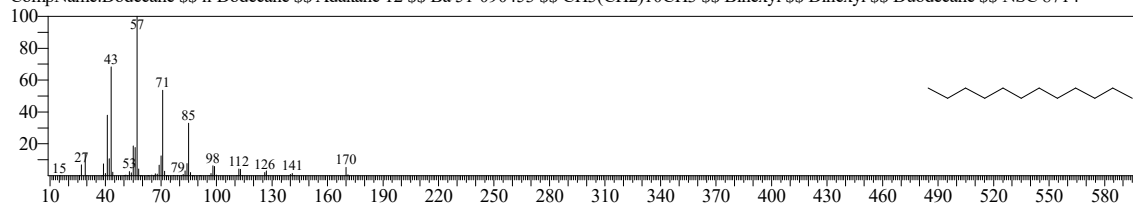

Hit#:5 Entry:27737 Library:NIST20R.lib

SI:87 Formula:C<sub>16</sub>H<sub>34</sub> CAS:544-76-3 MolWeight:226 RetIndex:1600

CompName:Hexadecane \$\$ n-Cetane \$\$ n-Hexadecane \$\$ Cetane

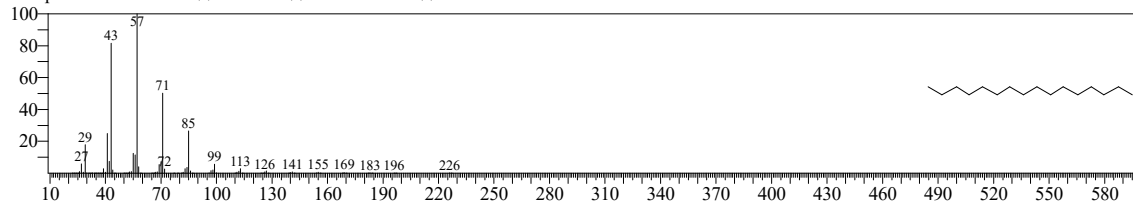

# TNAU

<< Target >>

Line#:5 R.Time:9.690(Scan#:1039) MassPeaks:300

RawMode:Averaged 9.685-9.695(1038-1040) BasePeak:57.05(5319)

BG Mode:Calc. from Peak Group 1 - Event 1 Q3 Scan

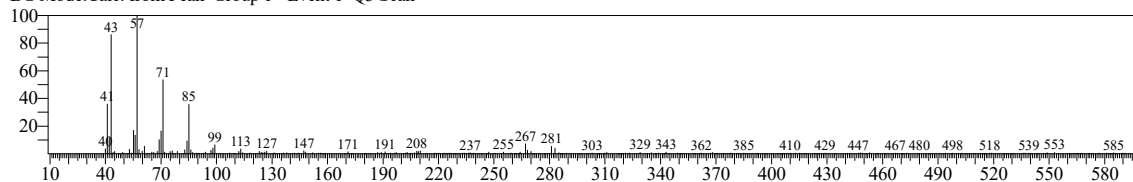

Hit#:1 Entry:12897 Library:NIST20R.lib

SI:90 Formula:C<sub>11</sub>H<sub>24</sub> CAS:1120-21-4 MolWeight:156 RetIndex:1100

CompName:Undecane \$\$ n-Undecane \$\$ Hendecane \$\$ n-C<sub>11</sub>H<sub>24</sub> \$\$ UN 2330

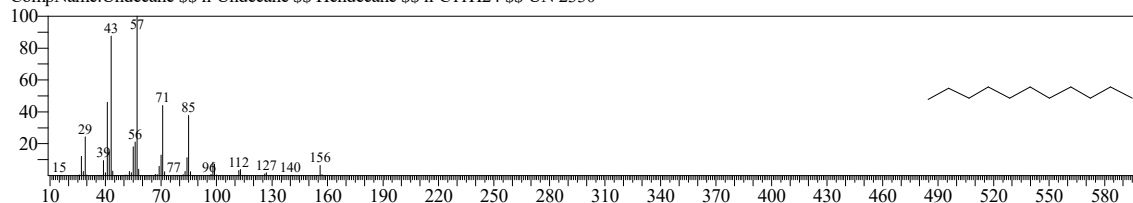

Hit#:2 Entry:16191 Library:NIST20R.lib

SI:90 Formula:C<sub>12</sub>H<sub>26</sub> CAS:112-40-3 MolWeight:170 RetIndex:1200

CompName:Dodecane \$\$ n-Dodecane \$\$ Adakane 12 \$\$ Ba 51-090453 \$\$ CH<sub>3</sub>(CH<sub>2</sub>)<sub>10</sub>CH<sub>3</sub> \$\$ Bihexyl \$\$ Dihexyl \$\$ Duodecane \$\$ NSC 8714

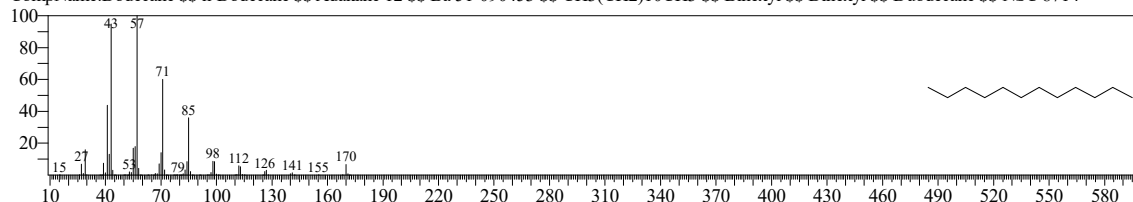

Hit#:3 Entry:40226 Library:NIST20M1.lib

SI:90 Formula:C<sub>13</sub>H<sub>28</sub> CAS:629-50-5 MolWeight:184 RetIndex:1300

CompName:Tridecane \$\$ n-Tridecane \$\$ Tridecane, n-



Hit#:4 Entry:27736 Library:NIST20R.lib

SI:89 Formula:C<sub>16</sub>H<sub>34</sub> CAS:544-76-3 MolWeight:226 RetIndex:1600

CompName:Hexadecane \$\$ n-Cetane \$\$ n-Hexadecane \$\$ Cetane

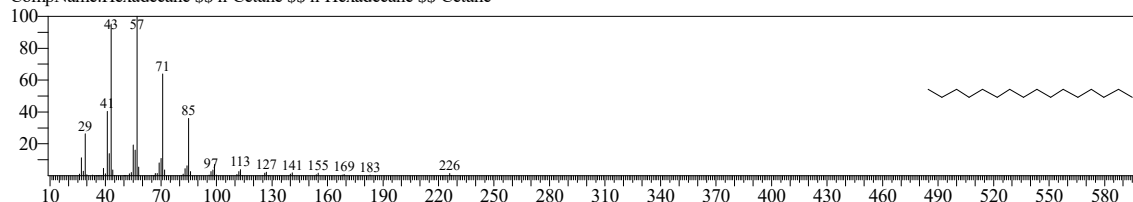

Hit#:5 Entry:29663 Library:NIST20R.lib

SI:89 Formula:C<sub>17</sub>H<sub>36</sub> CAS:629-78-7 MolWeight:240 RetIndex:1700

CompName:Heptadecane \$\$ n-Heptadecane \$\$ Normal-heptadecane

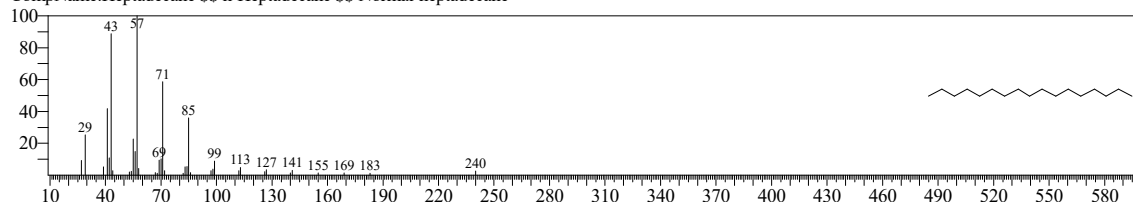

# TNAU

<< Target >>

Line#:6 R.Time:9.730(Scan#:1047) MassPeaks:290

RawMode:Averaged 9.725-9.735(1046-1048) BasePeak:133.05(317)

BG Mode:Calc. from Peak Group 1 - Event 1 Q3 Scan

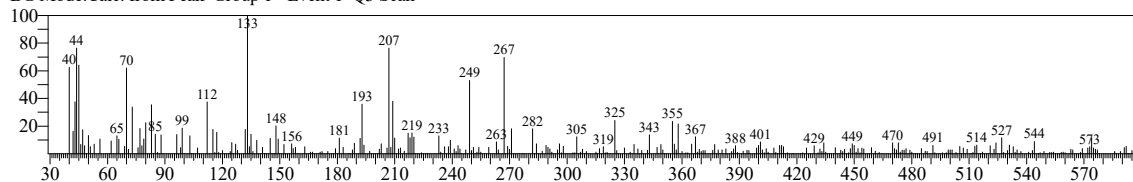

Hit#:1 Entry:179 Library:OA TMS\_DB5\_67min\_V3.lib

SI:35 Formula:C13H22O3Si2 CAS:99-06-9 MolWeight:282 RetIndex:1572

CompName:3-Hydroxybenzoic acid-2TMS ; 3-hydroxybenzoic acid



Hit#:2 Entry:211 Library:OA TMS\_DB5\_67min\_V3.lib

SI:34 Formula:C13H22O3Si2 CAS:99-96-7 MolWeight:282 RetIndex:1636

CompName:4-Hydroxybenzoic acid-2TMS ; 4-hydroxybenzoic acid

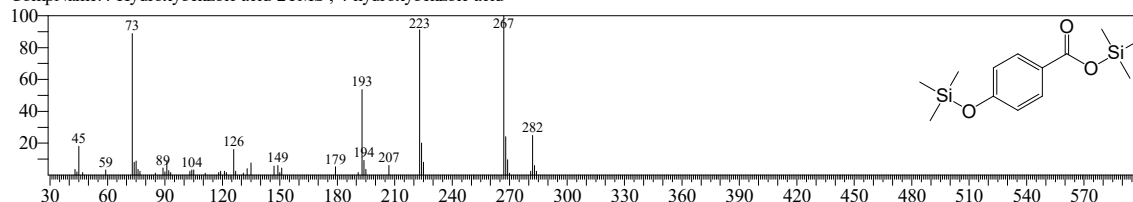

Hit#:3 Entry:343 Library:OA TMS\_DB5\_67min\_V3.lib

SI:34 Formula:C18H37NO3Si3 CAS:51-43-4 MolWeight:399 RetIndex:1868

CompName:Epinephrine-3TMS ; 4-[(1R)-1-hydroxy-2-(methylamino)ethyl]benzene-1,2-diol



Hit#:4 Entry:217 Library:OA TMS\_DB5\_67min\_V3.lib

SI:33 Formula:C15H27NO2Si2 CAS:150-30-1 MolWeight:309 RetIndex:1642

CompName:Phenylalanine-2TMS ; 2-amino-3-phenylpropanoic acid

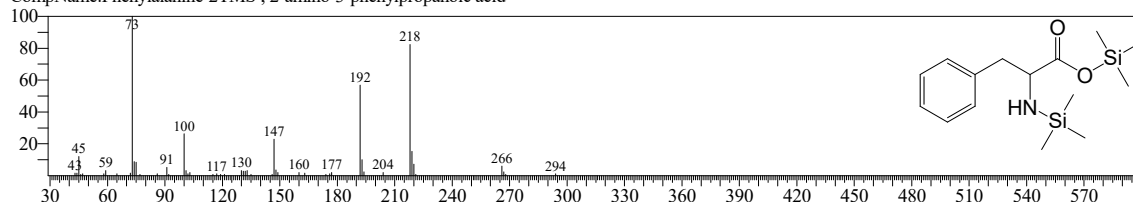

Hit#:5 Entry:290 Library:OA TMS\_DB5\_67min\_V3.lib

SI:32 Formula:C13H23NO3Si2 CAS:548-93-6 MolWeight:297 RetIndex:1773

CompName:3-Hydroxyanthranilic acid-2TMS ; 2-amino-3-hydroxybenzoic acid

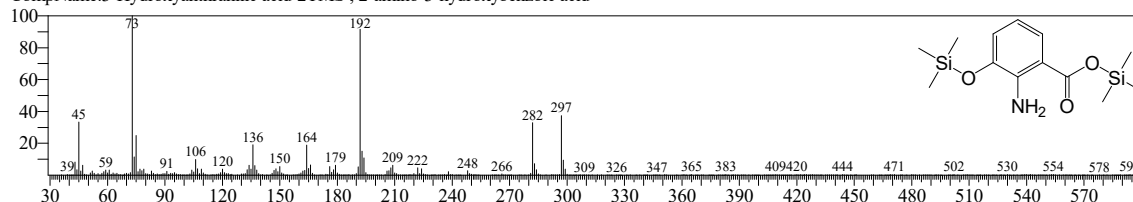



# TNAU

<< Target >>

Line#:7 R.Time:16.465(Scan#:2394) MassPeaks:326

RawMode:Averaged 16.460-16.470(2393-2395) BasePeak:71.10(2672)

BG Mode:Calc. from Peak Group 1 - Event 1 Q3 Scan

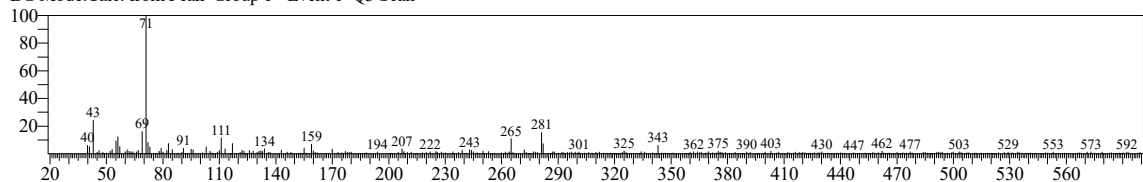

Hit#:1 Entry:34622 Library:NIST20R.lib

SI:72 Formula:C16H30O4 CAS:6846-50-0 MolWeight:286 RetIndex:1605

CompName:2,2,4-Trimethyl-1,3-pentandiol diisobutyrate \$\$ Propanoic acid, 2-methyl-, 2,2-dimethyl-1-(1-methylethyl)-1,3-propanediyl ester \$\$ 1,3-Pentan

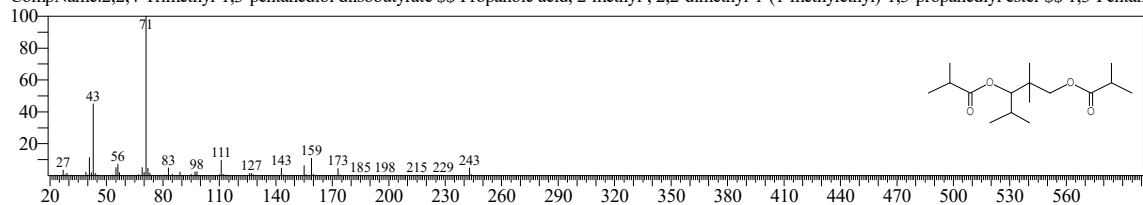

Hit#:2 Entry:146809 Library:NIST20M1.lib

SI:70 Formula:C16H30O4 CAS:0-00-0 MolWeight:286 RetIndex:1605

CompName:Pentanoic acid, 2,2,4-trimethyl-3-carboxyisopropyl, isobutyl ester \$\$ 1-Isobutyl 4-isopropyl 3-isopropyl-2,2-dimethylsuccinate #

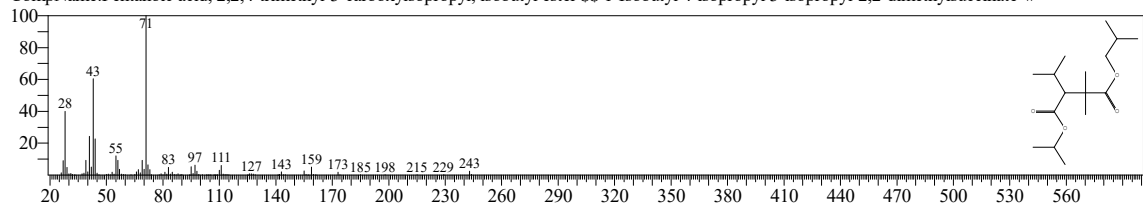

Hit#:3 Entry:1 Library:FA\_ME\_SP2560\_EI\_V3.lib

SI:45 Formula:C5H10O2 CAS:107-92-6 MolWeight:102 RetIndex:1113

CompName:Methyl butanoate ; Butanoic acid

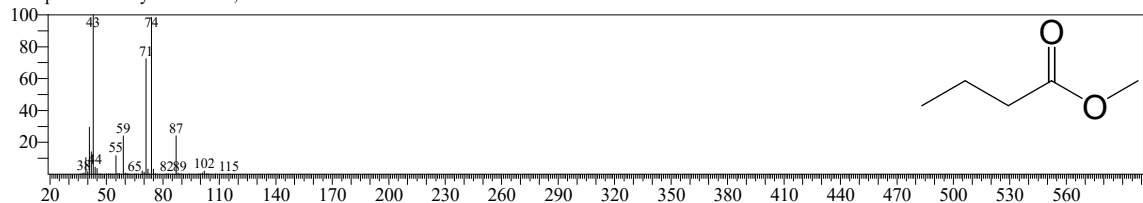

Hit#:4 Entry:491 Library:OA\_TMS\_DB5\_67min\_V3.lib

SI:41 Formula:C21H44O2Si CAS:57-11-4 MolWeight:356 RetIndex:2244

CompName:Stearic acid-TMS ; octadecanoic acid

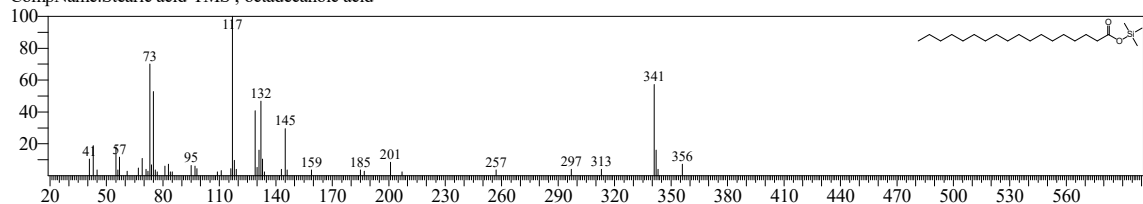

Hit#:5 Entry:446 Library:OA\_TMS\_DB5\_67min\_V3.lib

SI:39 Formula:C19H40O2Si CAS:57-10-3 MolWeight:328 RetIndex:2046

CompName:Palmitic acid-TMS ; hexadecanoic acid

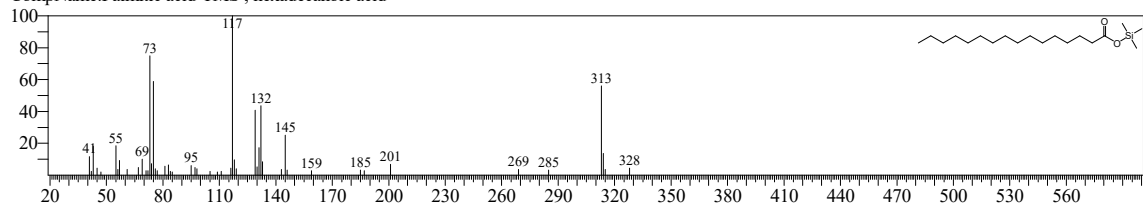

# TNAU

<< Target >>

Line#:8 R.Time:25.725(Scan#:4246) MassPeaks:318

RawMode:Averaged 25.720-25.730(4245-4247) BasePeak:281.05(940)

BG Mode:Calc. from Peak Group 1 - Event 1 Q3 Scan

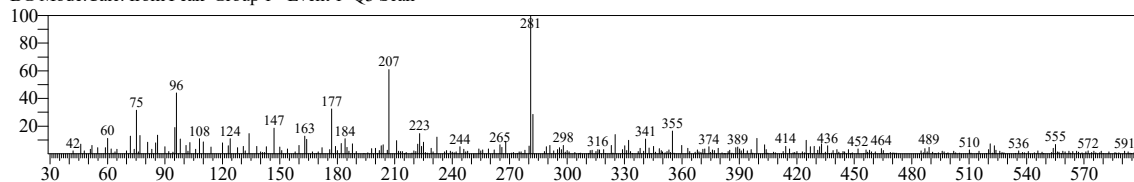

Hit#:1 Entry:456 Library:OA\_TMS\_DB5\_67min\_V3.lib

SI:28 Formula:C18H33NO3Si CAS:37350-58-6 MolWeight:339 RetIndex:2094

CompName:Metoprolol-TMS ; 1-[4-(2-methoxyethyl)phenoxy]-3-(propan-2-ylamino)propan-2-ol

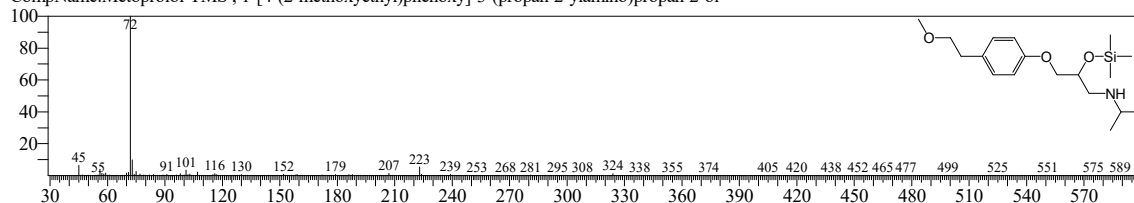

Hit#:2 Entry:402 Library:OA\_TMS\_DB5\_67min\_V3.lib

SI:26 Formula:C20H42O4Si4 CAS:775-01-9 MolWeight:458 RetIndex:1942

CompName:3,4-Dihydroxymandelic acid-4TMS ; 2-(3,4-dihydroxyphenyl)-2-hydroxyacetic acid

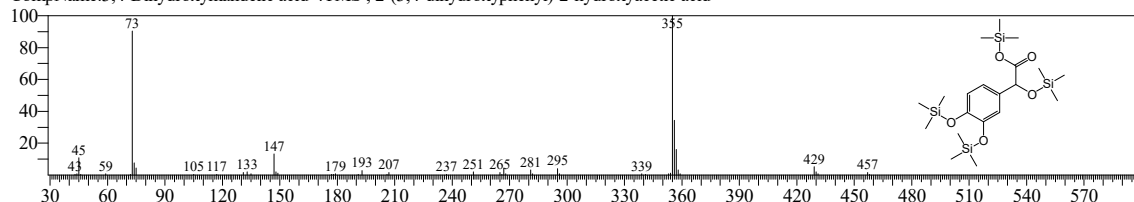

Hit#:3 Entry:558 Library:OA\_TMS\_DB5\_67min\_V3.lib

SI:25 Formula:C19H39N2O8PSi3 CAS:365-07-1 MolWeight:538 RetIndex:2905

CompName:Thymidine monophosphate-3TMS ; [(2R,3S,5R)-3-hydroxy-5-(5-methyl-2,4-dioxypyrimidin-1-yl)oxolan-2-yl]methyl dihydrogen phosph

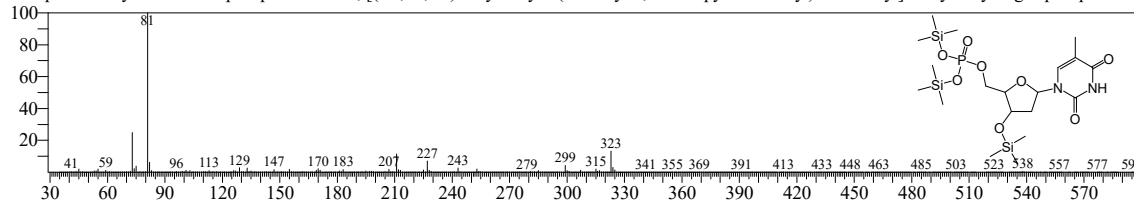

Hit#:4 Entry:310 Library:OA\_TMS\_DB5\_67min\_V3.lib

SI:24 Formula:C11H20N4OSi2 CAS:68-94-0 MolWeight:280 RetIndex:1822

CompName:Hypoxanthine-2TMS ; 3,7-dihydropurin-6-one

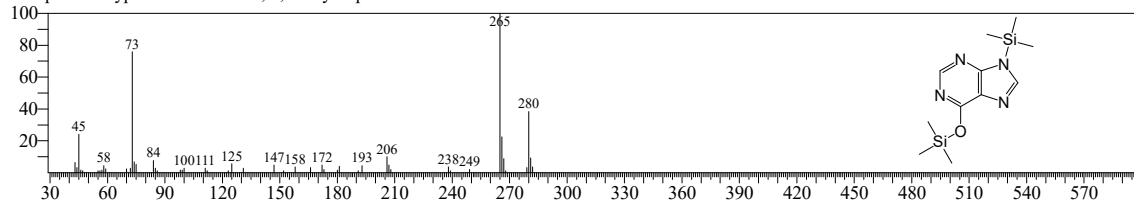

Hit#:5 Entry:30 Library:OA\_TMS\_DB5\_67min\_V3.lib

SI:23 Formula:C9H22O3Si2 CAS:503-66-2 MolWeight:234 RetIndex:1145

CompName:3-Hydroxypropionic acid-2TMS ; 3-hydroxypropanoic acid

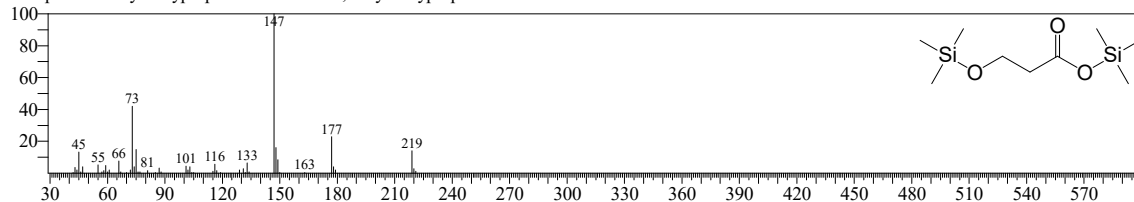

# TNAU

<< Target >>

Line#:9 R.Time:26.440(Scan#:4389) MassPeaks:318

RawMode:Averaged 26.435-26.445(4388-4390) BasePeak:133.05(445)

BG Mode:Calc. from Peak Group 1 - Event 1 Q3 Scan

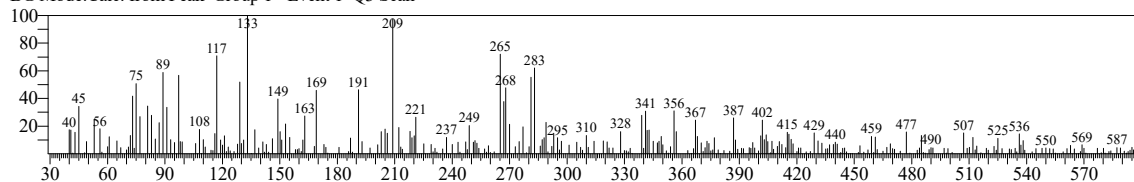

Hit#:1 Entry:491 Library:OA\_TMS\_DB5\_67min\_V3.lib

SI:35 Formula:C<sub>21</sub>H<sub>44</sub>O<sub>2</sub>Si CAS:57-11-4 MolWeight:356 RetIndex:2244

CompName:Stearic acid-TMS ; octadecanoic acid

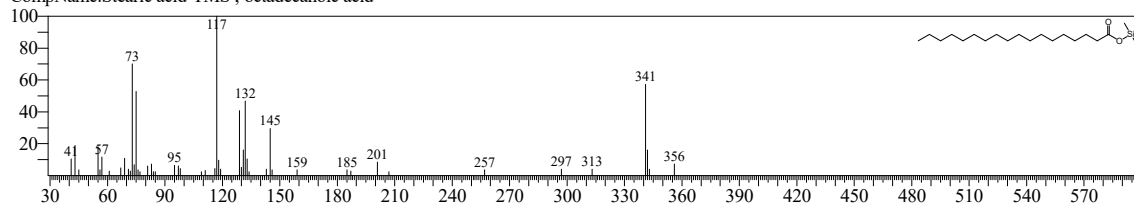

Hit#:2 Entry:485 Library:OA\_TMS\_DB5\_67min\_V3.lib

SI:32 Formula:C<sub>21</sub>H<sub>42</sub>O<sub>2</sub>Si CAS:112-80-1 MolWeight:354 RetIndex:2222

CompName:Oleic acid-TMS ; (Z)-octadec-9-enoic acid

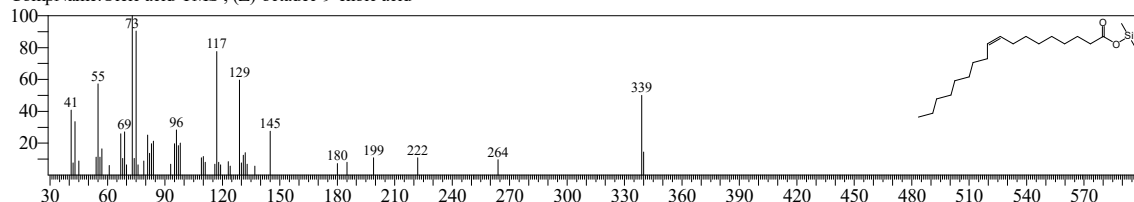

Hit#:3 Entry:511 Library:OA\_TMS\_DB5\_67min\_V3.lib

SI:32 Formula:C<sub>22</sub>H<sub>48</sub>O<sub>3</sub>Si<sub>2</sub> CAS:506-13-8 MolWeight:416 RetIndex:2396

CompName:Juniperic acid-2TMS ; 16-hydroxyhexadecanoic acid

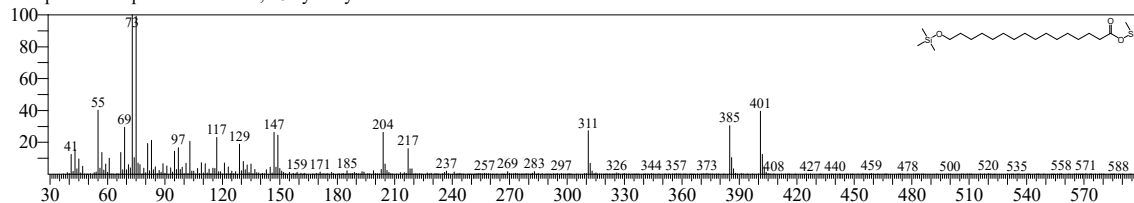

Hit#:4 Entry:455 Library:OA\_TMS\_DB5\_67min\_V3.lib

SI:32 Formula:C<sub>18</sub>H<sub>38</sub>O<sub>4</sub>Si<sub>2</sub> CAS:693-23-2 MolWeight:374 RetIndex:2092

CompName:Dodecanedioic acid-2TMS ; dodecanedioic acid

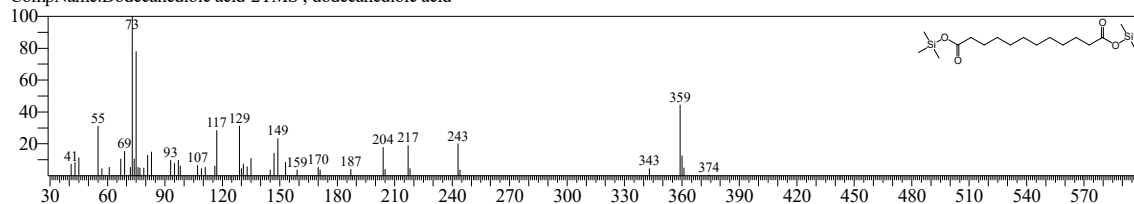

Hit#:5 Entry:487 Library:OA\_TMS\_DB5\_67min\_V3.lib

SI:31 Formula:C<sub>21</sub>H<sub>42</sub>O<sub>2</sub>Si CAS:112-79-8 MolWeight:354 RetIndex:2227

CompName:Elaidic acid-TMS ; (E)-octadec-9-enoic acid

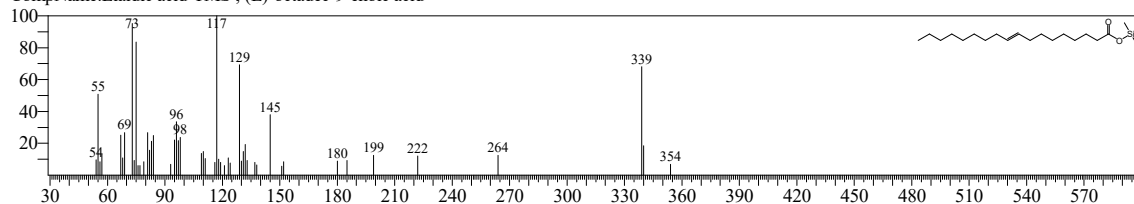

# TNAU

<< Target >>

Line#:10 R.Time:27.145(Scan#:4530) MassPeaks:288

RawMode:Averaged 27.140-27.150(4529-4531) BasePeak:281.00(496)

BG Mode:Calc. from Peak Group 1 - Event 1 Q3 Scan

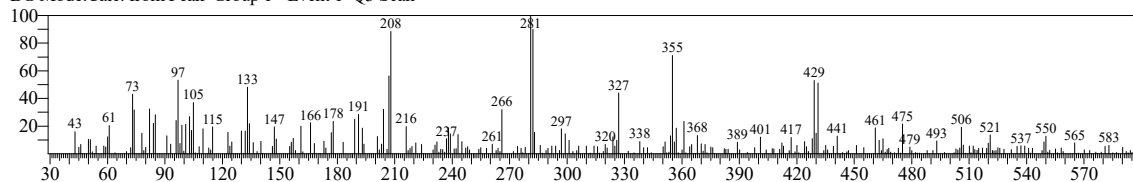

Hit#:1 Entry:402 Library:OA\_TMS\_DB5\_67min\_V3.lib

SI:36 Formula:C20H42O4Si4 CAS:775-01-9 MolWeight:458 RetIndex:1942

CompName:3,4-Dihydroxymandelic acid-4TMS ; 2-(3,4-dihydroxyphenyl)-2-hydroxyacetic acid

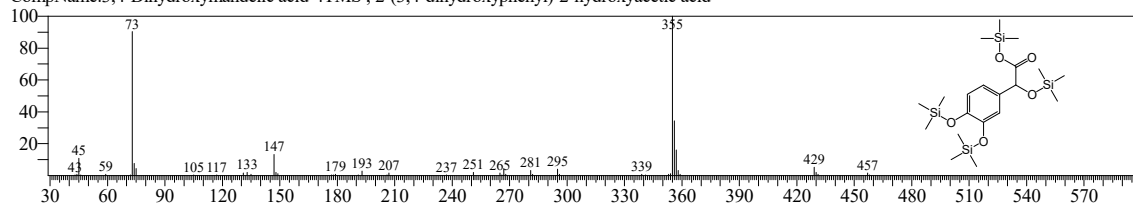

Hit#:2 Entry:328 Library:OA\_TMS\_DB5\_67min\_V3.lib

SI:31 Formula:C13H23NO2Si2 CAS:150-13-0 MolWeight:281 RetIndex:1845

CompName:4-Aminobenzoic acid-2TMS ; 4-aminobenzoic acid

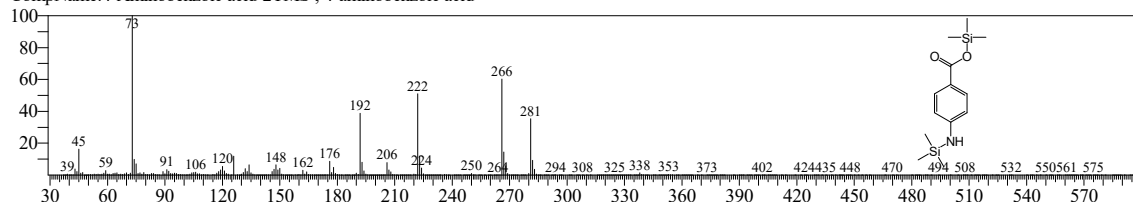

Hit#:3 Entry:343 Library:OA\_TMS\_DB5\_67min\_V3.lib

SI:31 Formula:C18H37NO3Si3 CAS:51-43-4 MolWeight:399 RetIndex:1868

CompName:Epinephrine-3TMS ; 4-[(1R)-1-hydroxy-2-(methylamino)ethyl]benzene-1,2-diol



Hit#:4 Entry:195 Library:OA\_TMS\_DB5\_67min\_V3.lib

SI:31 Formula:C15H26O3Si2 CAS:529-64-6 MolWeight:310 RetIndex:1600

CompName:Tropic acid-2TMS ; 3-hydroxy-2-phenylpropanoic acid

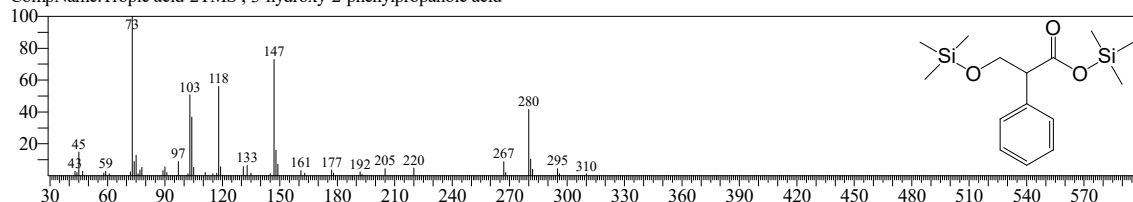

Hit#:5 Entry:290 Library:OA\_TMS\_DB5\_67min\_V3.lib

SI:29 Formula:C13H23NO3Si2 CAS:548-93-6 MolWeight:297 RetIndex:1773

CompName:3-Hydroxyanthranilic acid-2TMS ; 2-amino-3-hydroxybenzoic acid

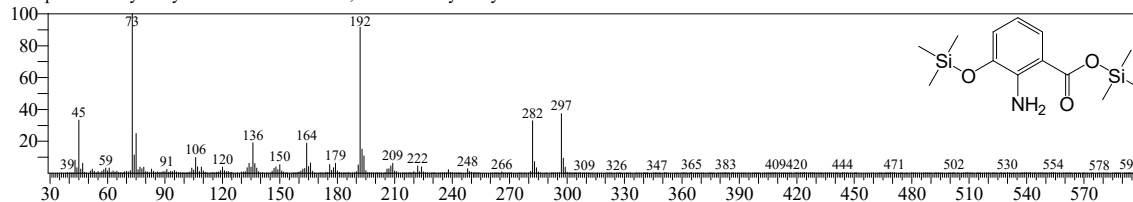

# TNAU

<< Target >>

Line#:11 R.Time:27.185(Scan#:4538) MassPeaks:315

RawMode:Averaged 27.180-27.190(4537-4539) BasePeak:207.05(1190)

BG Mode:Calc. from Peak Group 1 - Event 1 Q3 Scan

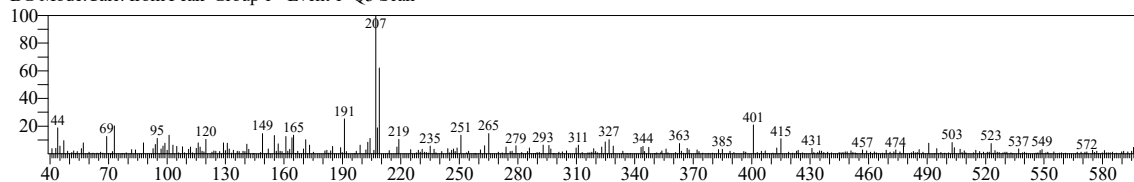

Hit#:1 Entry:267 Library:OA\_TMS\_DB5\_67min\_V3.lib

SI:34 Formula:C<sub>17</sub>H<sub>42</sub>O<sub>5</sub>Si<sub>4</sub> CAS:58-86-6 MolWeight:438 RetIndex:1732

CompName:Xylose-4TMS(1) ; (2R,3S,4R)-2,3,4,5-tetrahydroxypentanal

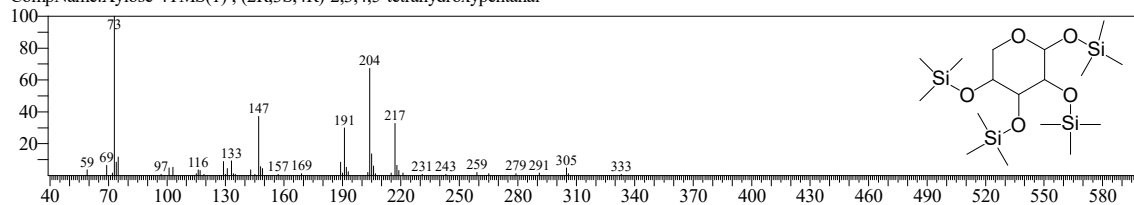

Hit#:2 Entry:250 Library:OA\_TMS\_DB5\_67min\_V3.lib

SI:33 Formula:C<sub>17</sub>H<sub>42</sub>O<sub>5</sub>Si<sub>4</sub> CAS:50-69-1 MolWeight:438 RetIndex:1691

CompName:Ribose-4TMS(4) ; (3R,4S,5R)-5-(hydroxymethyl)oxolane-2,3,4-triol

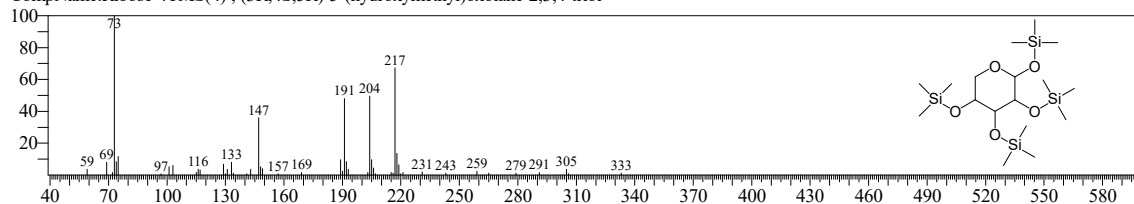

Hit#:3 Entry:238 Library:OA\_TMS\_DB5\_67min\_V3.lib

SI:33 Formula:C<sub>17</sub>H<sub>42</sub>O<sub>5</sub>Si<sub>4</sub> CAS:1114-34-7 MolWeight:438 RetIndex:1675

CompName:Lyxose-4TMS(2) ; (2S,3S,4R)-2,3,4,5-tetrahydroxypentanal

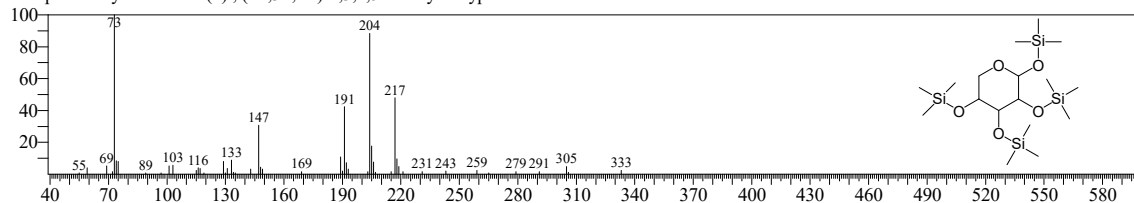

Hit#:4 Entry:252 Library:OA\_TMS\_DB5\_67min\_V3.lib

SI:33 Formula:C<sub>18</sub>H<sub>44</sub>O<sub>5</sub>Si<sub>4</sub> CAS:3615-37-0 MolWeight:452 RetIndex:1695

CompName:Fucose-4TMS(1) ; (2S,3R,4S,5R,6R)-6-methyloxane-2,3,4,5-tetrol

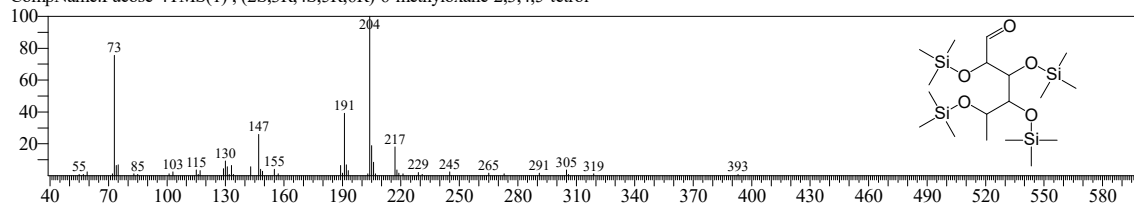

Hit#:5 Entry:311 Library:OA\_TMS\_DB5\_67min\_V3.lib

SI:33 Formula:C<sub>21</sub>H<sub>52</sub>O<sub>6</sub>Si<sub>5</sub> CAS:59-23-4 MolWeight:540 RetIndex:1824

CompName:Galactose-5TMS(1) ; (3R,4S,5R,6R)-6-(hydroxymethyl)oxane-2,3,4,5-tetrol

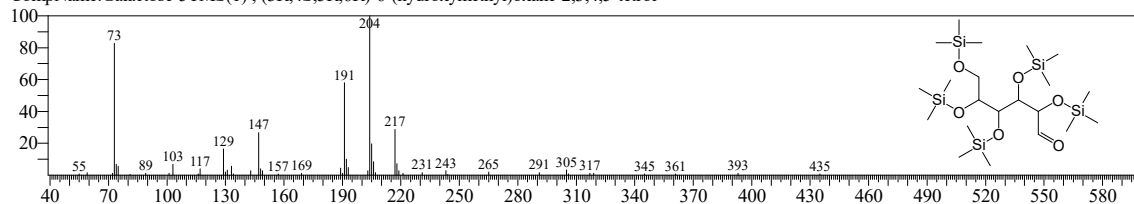

# TNAU

<< Target >>

Line#:12 R.Time:27.365(Scan#:4574) MassPeaks:335

RawMode:Averaged 27.360-27.370(4573-4575) BasePeak:281.05(639)

BG Mode:Calc. from Peak Group 1 - Event 1 Q3 Scan

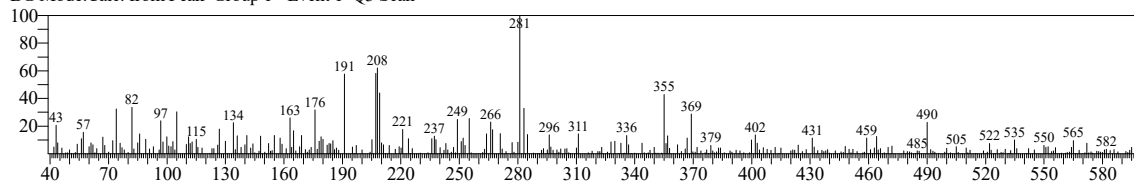

Hit#:1 Entry:402 Library:OA\_TMS\_DB5\_67min\_V3.lib

SI:26 Formula:C20H42O4Si4 CAS:775-01-9 MolWeight:458 RetIndex:1942

CompName:3,4-Dihydroxymandelic acid-4TMS ; 2-(3,4-dihydroxyphenyl)-2-hydroxyacetic acid

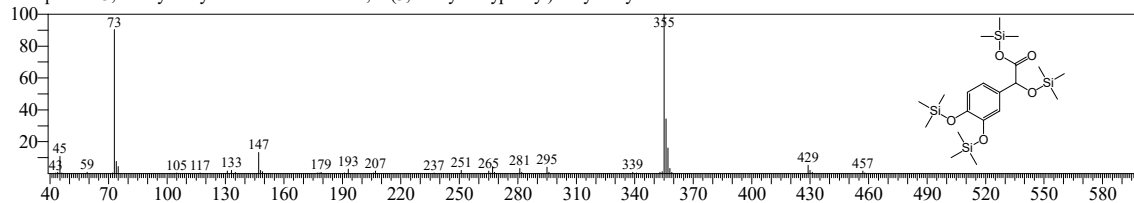

Hit#:2 Entry:203 Library:OA\_TMS\_DB5\_67min\_V3.lib

SI:25 Formula:C13H23NO2Si2 CAS:118-92-3 MolWeight:281 RetIndex:1623

CompName:Anthranilic acid-2TMS ; 2-aminobenzoic acid

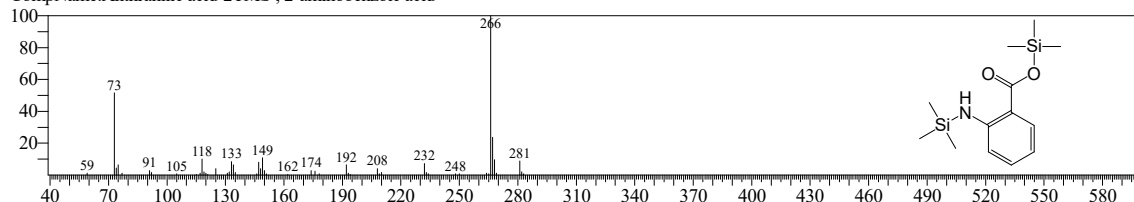

Hit#:3 Entry:356 Library:OA\_TMS\_DB5\_67min\_V3.lib

SI:25 Formula:C11H21N5Si2 CAS:73-24-5 MolWeight:279 RetIndex:1887

CompName:Adenine-2TMS ; 7H-purin-6-amine

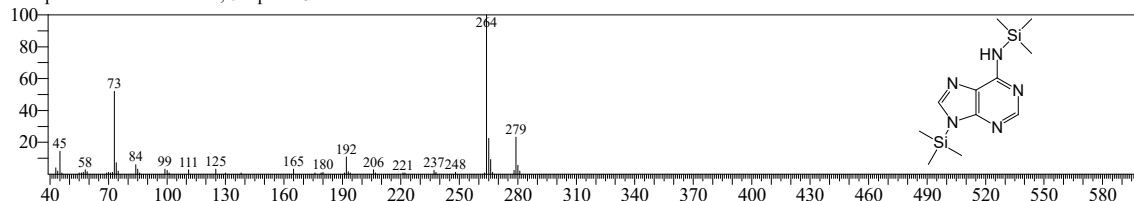

Hit#:4 Entry:382 Library:OA\_TMS\_DB5\_67min\_V3.lib

SI:21 Formula:C18H34O4Si3 CAS:6482-98-0 MolWeight:398 RetIndex:1918

CompName:4-Hydroxyphenyllactic acid-3TMS ; 2-hydroxy-3-(4-hydroxyphenyl)propanoate

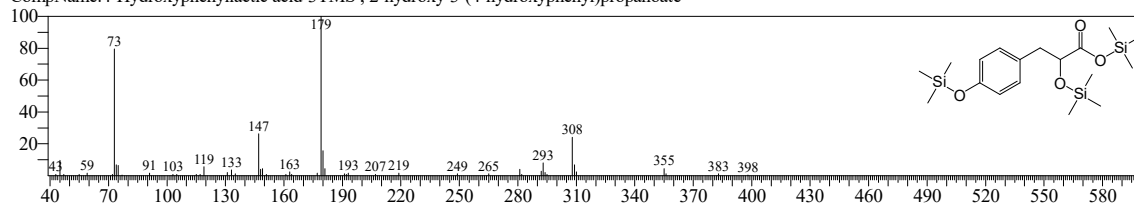

Hit#:5 Entry:506 Library:OA\_TMS\_DB5\_67min\_V3.lib

SI:20 Formula:C19H36N2O4Si3 CAS:2147-61-7 MolWeight:440 RetIndex:2375

CompName:3-Hydroxy-kynurenine-3TMS ; 2-amino-4-(2-amino-3-hydroxyphenyl)-4-oxobutanoic acid

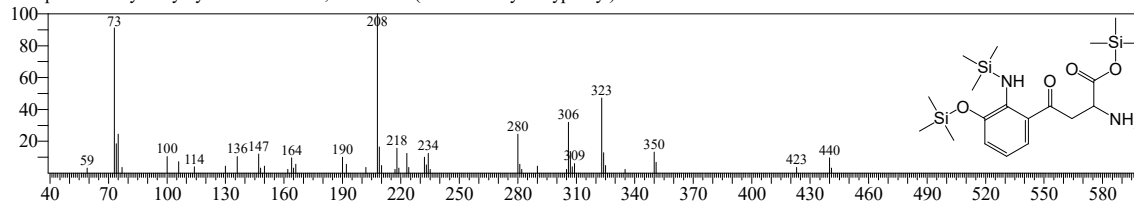

# TNAU

<< Target >>

Line#:13 R.Time:27.775(Scan#:4656) MassPeaks:303

RawMode:Averaged 27.770-27.780(4655-4657) BasePeak:207.05(1728)

BG Mode:Calc. from Peak Group 1 - Event 1 Q3 Scan

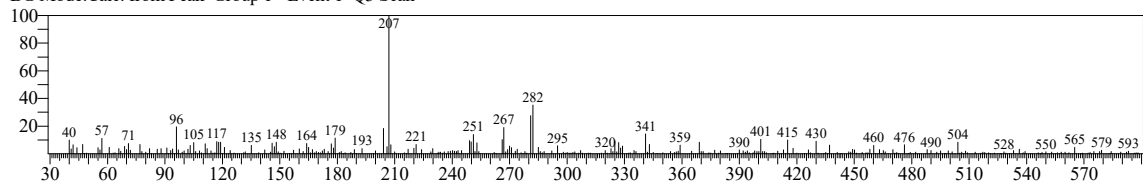

Hit#:1 Entry:179 Library:OA\_TMS\_DB5\_67min\_V3.lib

SI:28 Formula:C<sub>13</sub>H<sub>22</sub>O<sub>3</sub>Si<sub>2</sub> CAS:99-06-9 MolWeight:282 RetIndex:1572

CompName:3-Hydroxybenzoic acid-2TMS ; 3-hydroxybenzoic acid

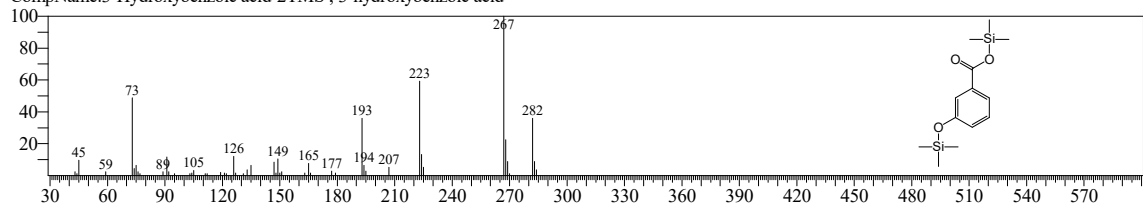

Hit#:2 Entry:330 Library:OA\_TMS\_DB5\_67min\_V3.lib

SI:28 Formula:C<sub>12</sub>H<sub>17</sub>NO<sub>3</sub>Si CAS:66407-11-2 MolWeight:251 RetIndex:1849

CompName:Hippuric acid-TMS ; 2-benzamidoacetic acid

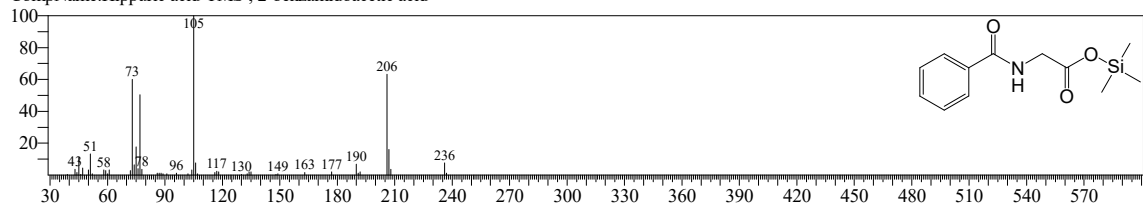

Hit#:3 Entry:203 Library:OA\_TMS\_DB5\_67min\_V3.lib

SI:27 Formula:C<sub>13</sub>H<sub>23</sub>NO<sub>2</sub>Si<sub>2</sub> CAS:118-92-3 MolWeight:281 RetIndex:1623

CompName:Anthranilic acid-2TMS ; 2-aminobenzoic acid

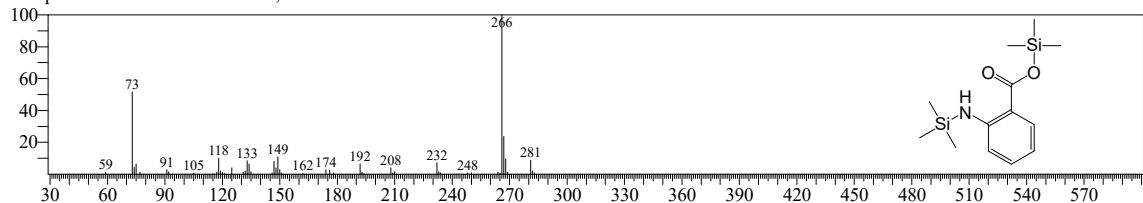

Hit#:4 Entry:382 Library:OA\_TMS\_DB5\_67min\_V3.lib

SI:27 Formula:C<sub>18</sub>H<sub>34</sub>O<sub>4</sub>Si<sub>3</sub> CAS:6482-98-0 MolWeight:398 RetIndex:1918

CompName:4-Hydroxyphenyllactic acid-3TMS ; 2-hydroxy-3-(4-hydroxyphenyl)propanoate

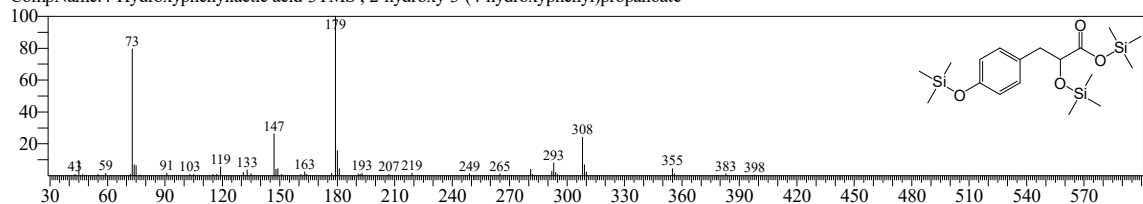

Hit#:5 Entry:211 Library:OA\_TMS\_DB5\_67min\_V3.lib

SI:26 Formula:C<sub>13</sub>H<sub>22</sub>O<sub>3</sub>Si<sub>2</sub> CAS:99-96-7 MolWeight:282 RetIndex:1636

CompName:4-Hydroxybenzoic acid-2TMS ; 4-hydroxybenzoic acid

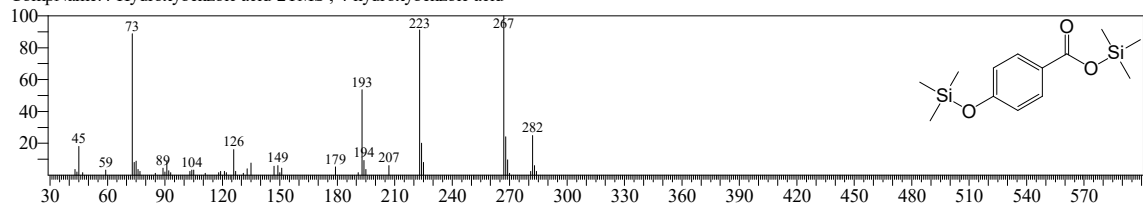

# TNAU

<< Target >>

Line#:14 R.Time:27.985(Scan#:4698) MassPeaks:299

RawMode:Averaged 27.980-27.990(4697-4699) BasePeak:44.05(568)

BG Mode:Calc. from Peak Group 1 - Event 1 Q3 Scan

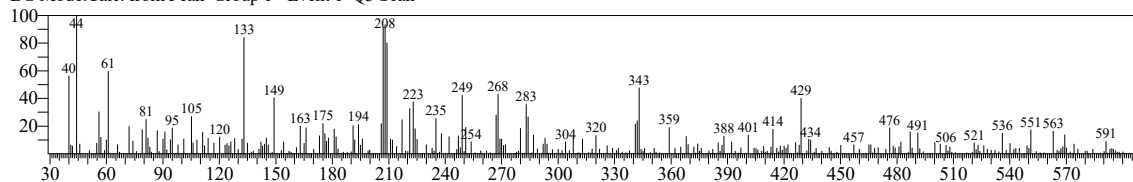

Hit#:1 Entry:179 Library:OA\_TMS\_DB5\_67min\_V3.lib

SI:30 Formula:C<sub>13</sub>H<sub>22</sub>O<sub>3</sub>Si<sub>2</sub> CAS:99-06-9 MolWeight:282 RetIndex:1572

CompName:3-Hydroxybenzoic acid-2TMS ; 3-hydroxybenzoic acid

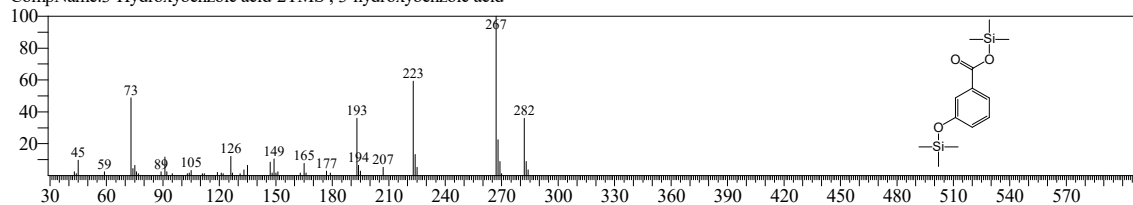

Hit#:2 Entry:211 Library:OA\_TMS\_DB5\_67min\_V3.lib

SI:28 Formula:C<sub>13</sub>H<sub>22</sub>O<sub>3</sub>Si<sub>2</sub> CAS:99-96-7 MolWeight:282 RetIndex:1636

CompName:4-Hydroxybenzoic acid-2TMS ; 4-hydroxybenzoic acid

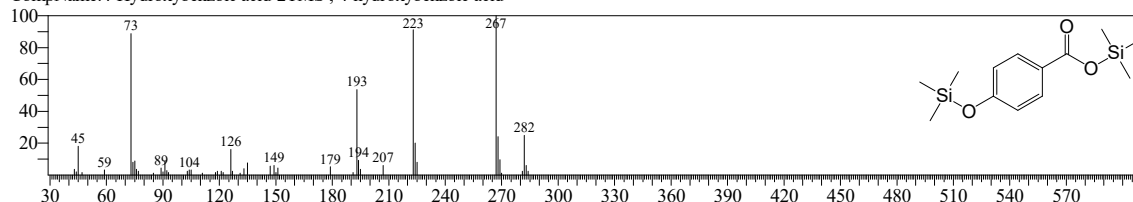

Hit#:3 Entry:330 Library:OA\_TMS\_DB5\_67min\_V3.lib

SI:24 Formula:C<sub>12</sub>H<sub>11</sub>NO<sub>3</sub>Si CAS:66407-11-2 MolWeight:251 RetIndex:1849

CompName:Hippuric acid-TMS ; 2-benzamidoacetic acid

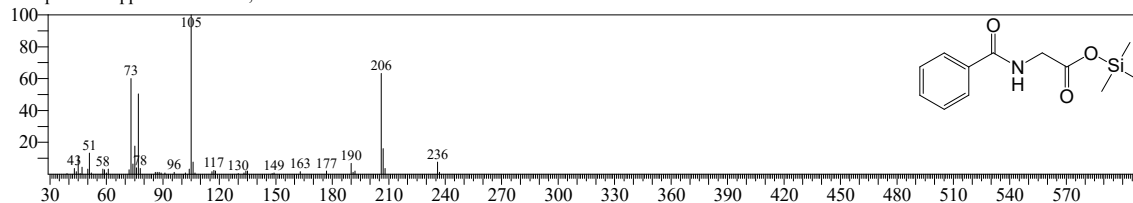

Hit#:4 Entry:530 Library:OA\_TMS\_DB5\_67min\_V3.lib

SI:19 Formula:C<sub>23</sub>H<sub>25</sub>N CAS:13042-18-7 MolWeight:315 RetIndex:2545

CompName:Fendiline ; 3,3-diphenyl-N-(1-phenylethyl)propan-1-amine

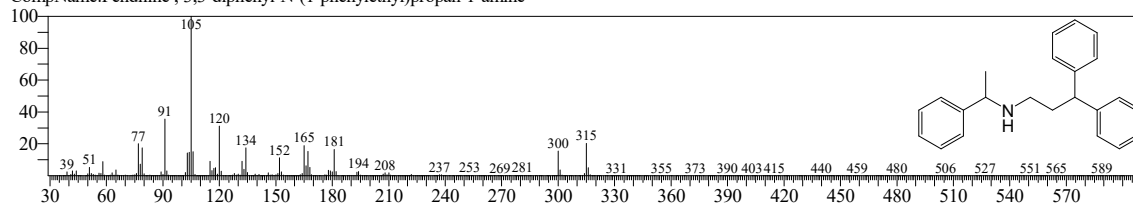

Hit#:5 Entry:341 Library:OA\_TMS\_DB5\_67min\_V3.lib

SI:19 Formula:C<sub>18</sub>H<sub>34</sub>O<sub>4</sub>Si<sub>3</sub> CAS:3247-75-4 MolWeight:398 RetIndex:1864

CompName:3-(3-Hydroxyphenyl)-3-hydroxypropionic acid-3TMS ; 3-hydroxy-3-(3-hydroxyphenyl)propanoic acid

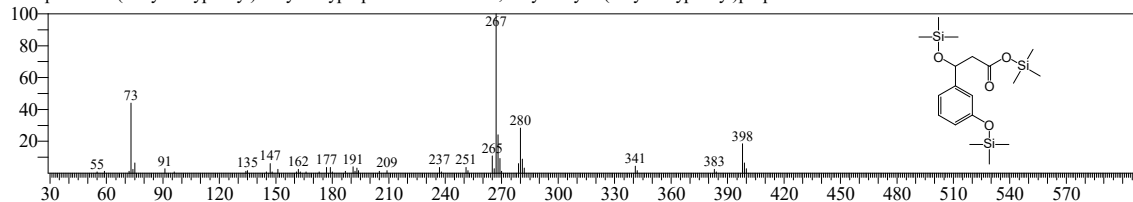



# TNAU

<< Target >>

Line#:15 R.Time:28.480(Scan#:4797) MassPeaks:315

RawMode:Averaged 28.475-28.485(4796-4798) BasePeak:281.05(1691)

BG Mode:Calc. from Peak Group 1 - Event 1 Q3 Scan

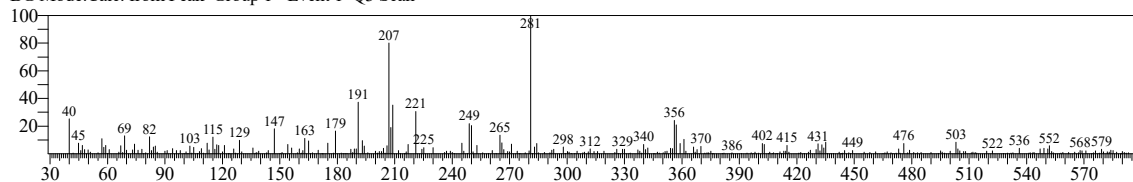

Hit#:1 Entry:382 Library:OA\_TMS\_DB5\_67min\_V3.lib

SI:31 Formula:C18H34O4Si3 CAS:6482-98-0 MolWeight:398 RetIndex:1918

CompName:4-Hydroxyphenyllactic acid-3TMS ; 2-hydroxy-3-(4-hydroxyphenyl)propanoate

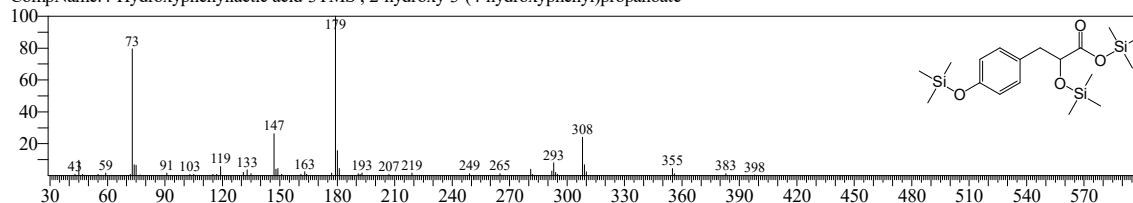

Hit#:2 Entry:310 Library:OA\_TMS\_DB5\_67min\_V3.lib

SI:29 Formula:C11H20N4OSi2 CAS:68-94-0 MolWeight:280 RetIndex:1822

CompName:Hypoxanthine-2TMS ; 3,7-dihydropurin-6-one

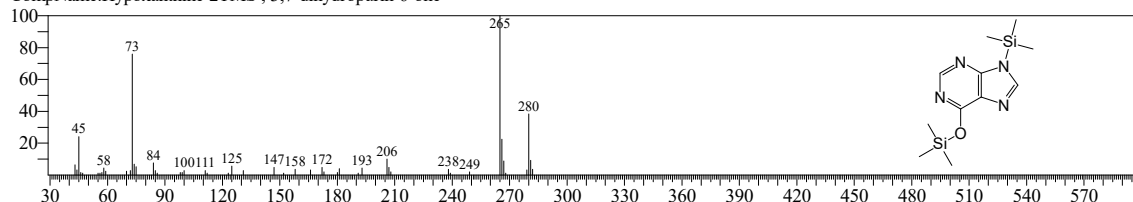

Hit#:3 Entry:315 Library:OA\_TMS\_DB5\_67min\_V3.lib

SI:25 Formula:C16H30O4Si3 CAS:99-50-3 MolWeight:370 RetIndex:1833

CompName:Protocatechuic acid-3TMS ; 3,4-dihydroxybenzoic acid

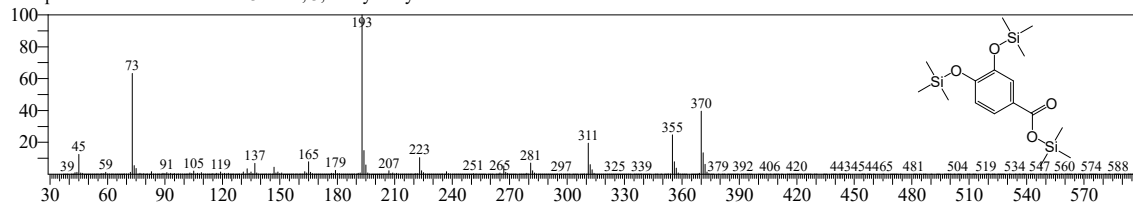

Hit#:4 Entry:552 Library:OA\_TMS\_DB5\_67min\_V3.lib

SI:25 Formula:C36H86O11Si8 CAS:99-20-7 MolWeight:918 RetIndex:2812

CompName:Trehalose-8TMS ; (2R,3S,4S,5R,6R)-2-(hydroxymethyl)-6-[(2R,3R,4S,5S,6R)-3,4,5-trihydroxy-6-(hydroxymethyl)oxan-2-yl]oxyoxane-

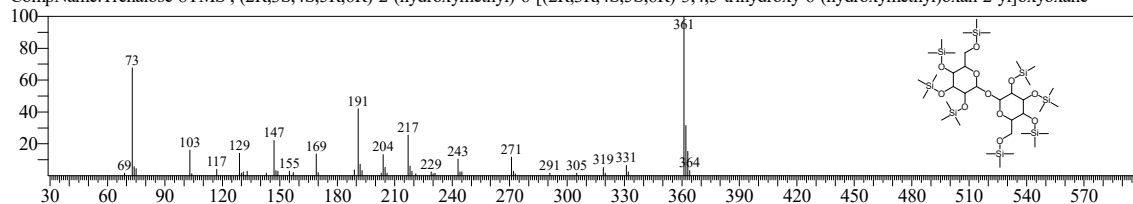

Hit#:5 Entry:138 Library:OA\_TMS\_DB5\_67min\_V3.lib

SI:25 Formula:C14H24O3Si2 CAS:90-64-2 MolWeight:296 RetIndex:1486

CompName:Mandelic acid-2TMS ; 2-hydroxy-2-phenylacetic acid

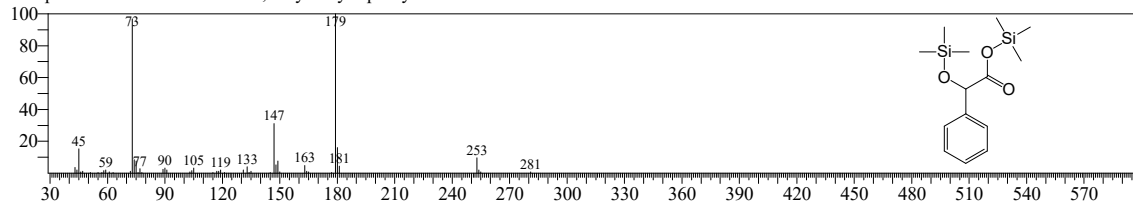

# TNAU

<< Target >>

Line#:16 R.Time:28.595(Scan#:4820) MassPeaks:284

RawMode:Averaged 28.590-28.600(4819-4821) BasePeak:209.05(797)

BG Mode:Calc. from Peak Group 1 - Event 1 Q3 Scan

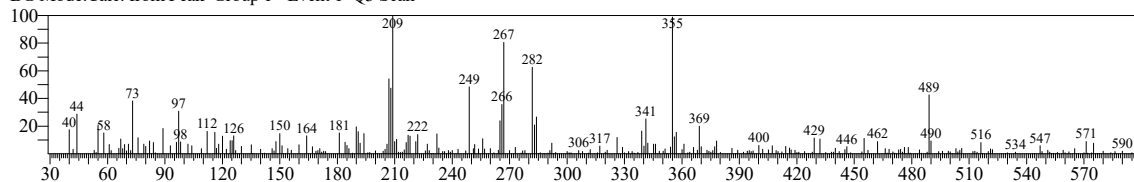

Hit#:1 Entry:402 Library:OA\_TMS\_DB5\_67min\_V3.lib

SI:37 Formula:C20H42O4Si4 CAS:775-01-9 MolWeight:458 RetIndex:1942

CompName:3,4-Dihydroxymandelic acid-4TMS ; 2-(3,4-dihydroxyphenyl)-2-hydroxyacetic acid

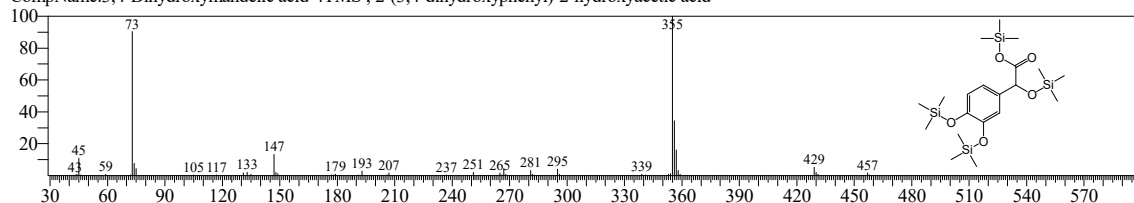

Hit#:2 Entry:343 Library:OA\_TMS\_DB5\_67min\_V3.lib

SI:33 Formula:C18H37NO3Si3 CAS:51-43-4 MolWeight:399 RetIndex:1868

CompName:Epinephrine-3TMS ; 4-[(1R)-1-hydroxy-2-(methylamino)ethyl]benzene-1,2-diol

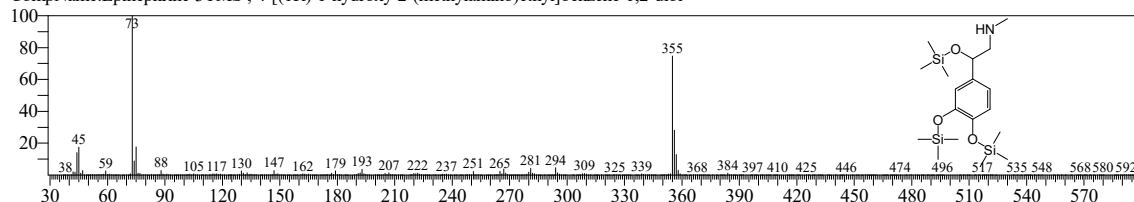

Hit#:3 Entry:310 Library:OA\_TMS\_DB5\_67min\_V3.lib

SI:31 Formula:C11H20N4OSi2 CAS:68-94-0 MolWeight:280 RetIndex:1822

CompName:Hypoxanthine-2TMS ; 3,7-dihydropurin-6-one

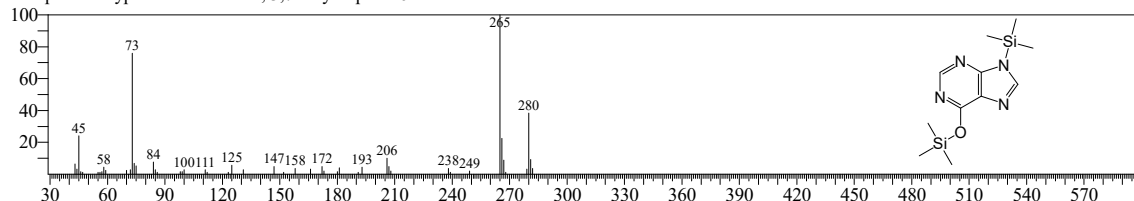

Hit#:4 Entry:328 Library:OA\_TMS\_DB5\_67min\_V3.lib

SI:30 Formula:C13H23NO2Si2 CAS:150-13-0 MolWeight:281 RetIndex:1845

CompName:4-Aminobenzoic acid-2TMS ; 4-aminobenzoic acid

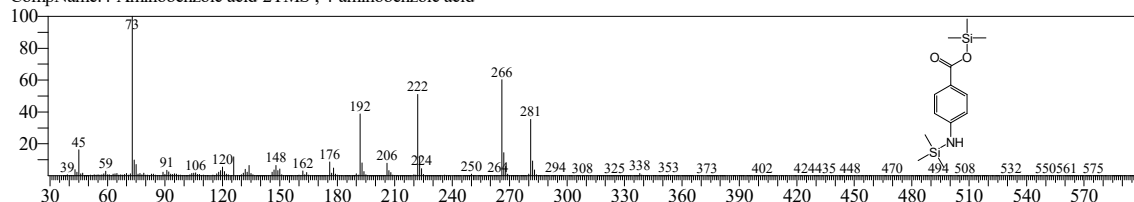

Hit#:5 Entry:179 Library:OA\_TMS\_DB5\_67min\_V3.lib

SI:30 Formula:C13H22O3Si2 CAS:99-06-9 MolWeight:282 RetIndex:1572

CompName:3-Hydroxybenzoic acid-2TMS ; 3-hydroxybenzoic acid

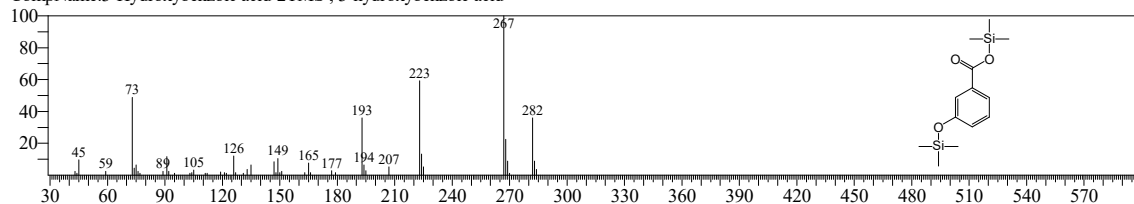

# TNAU

<< Target >>

Line#:17 R.Time:28.735(Scan#:4848) MassPeaks:300

RawMode:Averaged 28.730-28.740(4847-4849) BasePeak:208.05(980)

BG Mode:Calc. from Peak Group 1 - Event 1 Q3 Scan

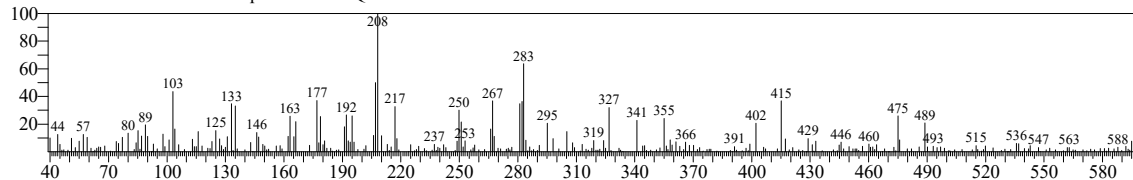

Hit#:1 Entry:179 Library:OA TMS DB5 67min V3.lib

SI:32 Formula:C13H22O3Si2 CAS:99-06-9 MolWeight:282 RetIndex:1572

CompName:3-Hydroxybenzoic acid-2TMS ; 3-hydroxybenzoic acid

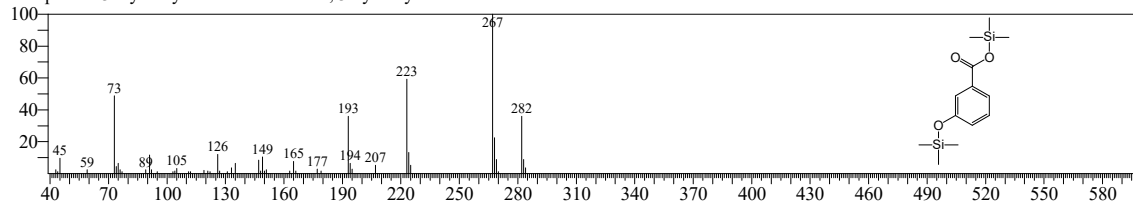

Hit#:2 Entry:203 Library:OA TMS DB5 67min V3.lib

SI:30 Formula:C13H23NO2Si2 CAS:118-92-3 MolWeight:281 RetIndex:1623

CompName:Anthranilic acid-2TMS ; 2-aminobenzoic acid

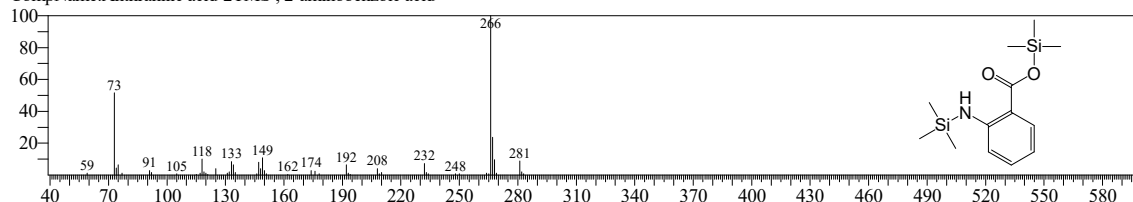

Hit#:3 Entry:211 Library:OA TMS DB5 67min V3.lib

SI:28 Formula:C13H22O3Si2 CAS:99-96-7 MolWeight:282 RetIndex:1636

CompName:4-Hydroxybenzoic acid-2TMS ; 4-hydroxybenzoic acid

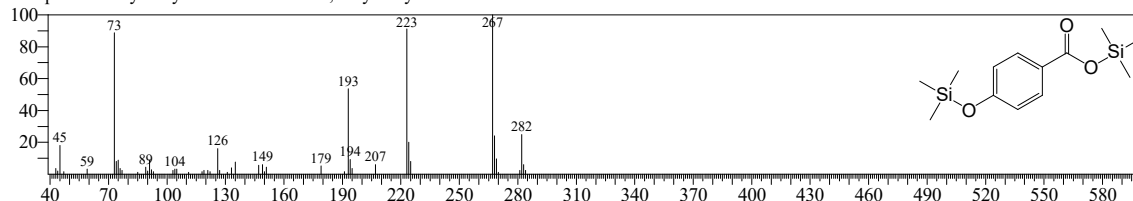

Hit#:4 Entry:341 Library:OA TMS DB5 67min V3.lib

SI:25 Formula:C18H34O4Si3 CAS:3247-75-4 MolWeight:398 RetIndex:1864

CompName:3-(3-Hydroxyphenyl)-3-hydroxypropionic acid-3TMS ; 3-hydroxy-3-(3-hydroxyphenyl)propanoic acid

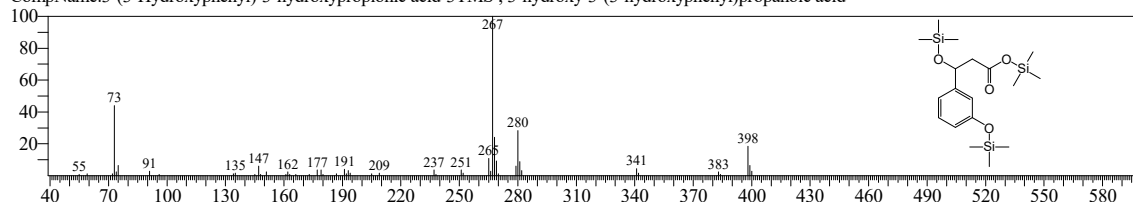

Hit#:5 Entry:402 Library:OA TMS DB5 67min V3.lib

SI:24 Formula:C20H42O4Si4 CAS:775-01-9 MolWeight:458 RetIndex:1942

CompName:3,4-Dihydroxymandelic acid-4TMS ; 2-(3,4-dihydroxyphenyl)-2-hydroxyacetic acid

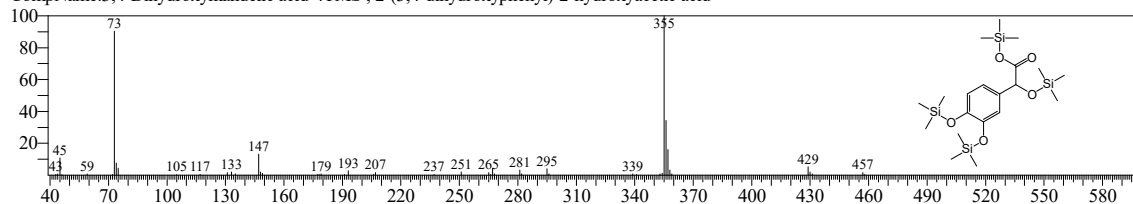

# TNAU

<< Target >>

Line#:18 R.Time:29.470(Scan#:4995) MassPeaks:284

RawMode:Averaged 29.465-29.475(4994-4996) BasePeak:73.05(887)

BG Mode:Calc. from Peak Group 1 - Event 1 Q3 Scan

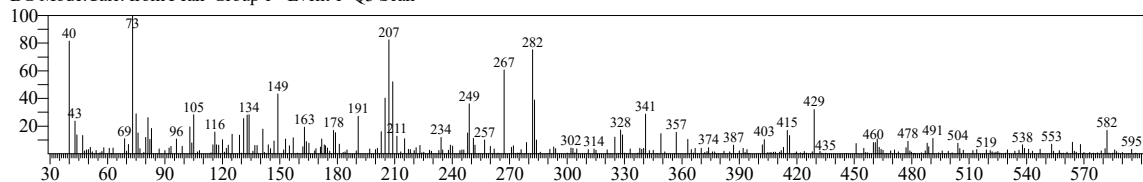

Hit#:1 Entry:294 Library:OA\_TMS\_DB5\_67min\_V3.lib

SI:37 Formula:C15H26O4Si2 CAS:306-08-1 MolWeight:326 RetIndex:1782

CompName:Homovanillic acid-2TMS ; 2-(4-hydroxy-3-methoxyphenyl)acetic acid

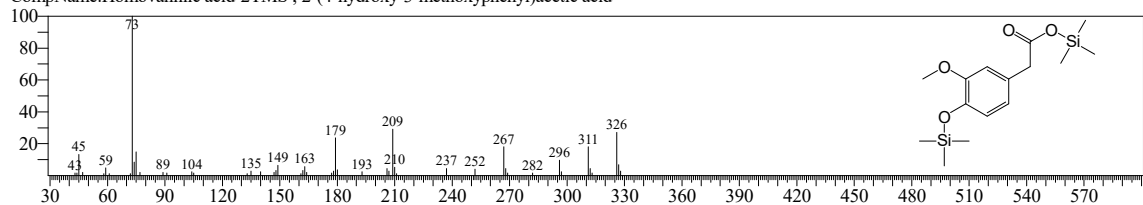

Hit#:2 Entry:61 Library:OA\_TMS\_DB5\_67min\_V3.lib

SI:36 Formula:C11H26O3Si2 CAS:10237-77-1 MolWeight:262 RetIndex:1244

CompName:3-Hydroxyvaleric acid-2TMS ; 3-hydroxy-3-methylbutanoic acid

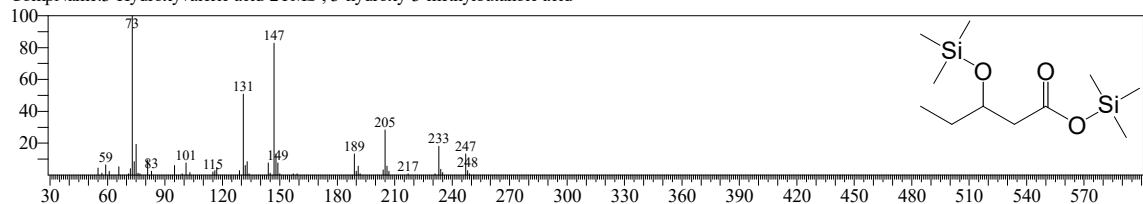

Hit#:3 Entry:211 Library:OA\_TMS\_DB5\_67min\_V3.lib

SI:36 Formula:C13H22O3Si2 CAS:99-96-7 MolWeight:282 RetIndex:1636

CompName:4-Hydroxybenzoic acid-2TMS ; 4-hydroxybenzoic acid

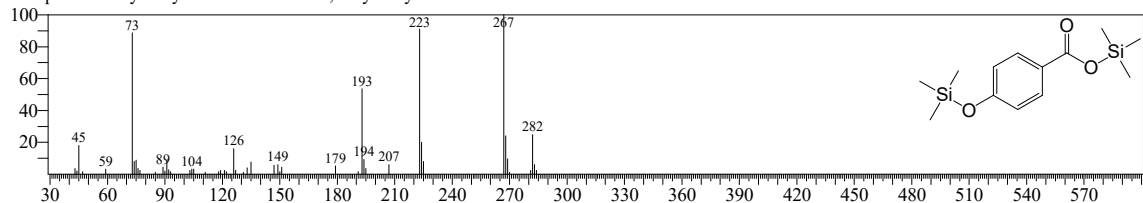

Hit#:4 Entry:77 Library:OA\_TMS\_DB5\_67min\_V3.lib

SI:35 Formula:C12H32O3Si3 CAS:56-81-5 MolWeight:308 RetIndex:1279

CompName:Glycerol-3TMS ; propane-1,2,3-triol

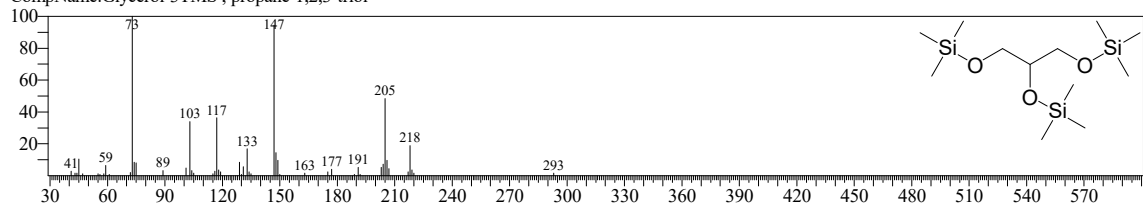

Hit#:5 Entry:343 Library:OA\_TMS\_DB5\_67min\_V3.lib

SI:34 Formula:C18H37NO3Si3 CAS:51-43-4 MolWeight:399 RetIndex:1868

CompName:Epinephrine-2TMS ; 4-[(1R)-1-hydroxy-2-(methylamino)ethyl]benzene-1,2-diol

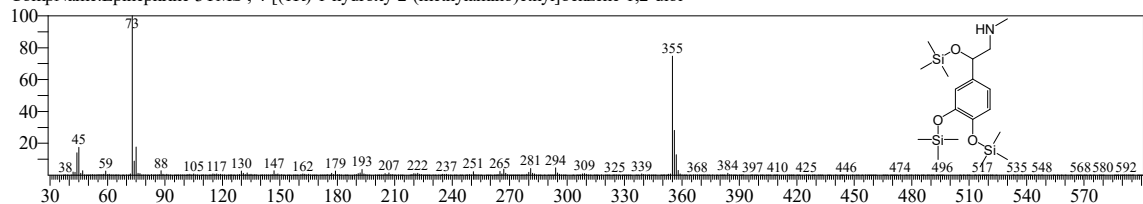

# TNAU

<< Target >>

Line#:19 R.Time:29.535(Scan#:5008) MassPeaks:275

RawMode:Averaged 29.530-29.540(5007-5009) BasePeak:207.05(3005)

BG Mode:Calc. from Peak Group 1 - Event 1 Q3 Scan

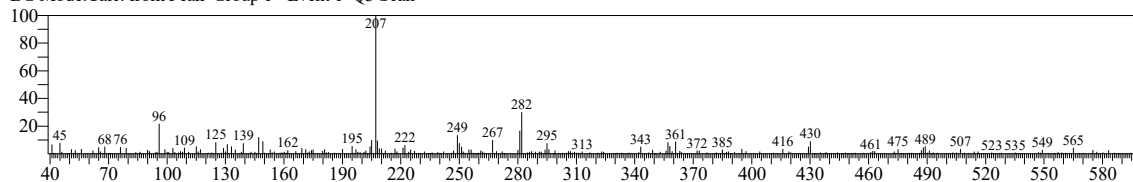

Hit#:1 Entry:308 Library:OA\_TMS\_DB5\_67min\_V3.lib

SI:32 Formula:C<sub>19</sub>H<sub>42</sub>O<sub>5</sub>Si<sub>4</sub> CAS:138-59-0 MolWeight:462 RetIndex:1819

CompName:Shikimic acid-4TMS ; 3,4,5-trihydroxycyclohexene-1-carboxylic acid

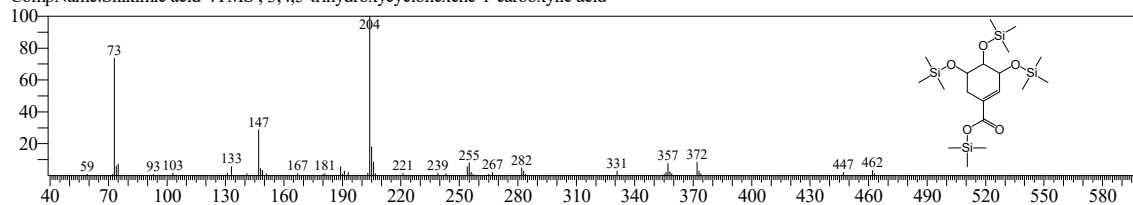

Hit#:2 Entry:10 Library:OA\_TMS\_DB5\_67min\_V3.lib

SI:31 Formula:C<sub>10</sub>H<sub>24</sub>O<sub>3</sub>Si<sub>2</sub> CAS:594-61-6 MolWeight:248 RetIndex:1067

CompName:2-Hydroxyisobutyric acid-2TMS ; 2-hydroxy-2-methylpropanoic acid

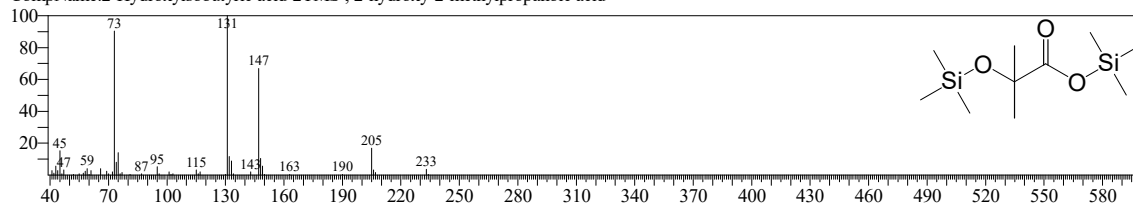

Hit#:3 Entry:219 Library:OA\_TMS\_DB5\_67min\_V3.lib

SI:29 Formula:C<sub>18</sub>H<sub>44</sub>O<sub>5</sub>Si<sub>4</sub> CAS:10485-94-6 MolWeight:452 RetIndex:1646

CompName:Rhamnose-4TMS(1) ; (2R,3R,4S,5S)-2,3,4,5-tetrahydroxyhexanal

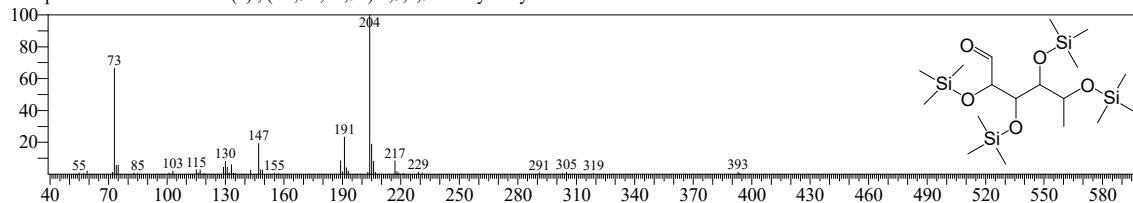

Hit#:4 Entry:276 Library:OA\_TMS\_DB5\_67min\_V3.lib

SI:29 Formula:C<sub>18</sub>H<sub>44</sub>O<sub>5</sub>Si<sub>4</sub> CAS:154-17-6 MolWeight:452 RetIndex:1745

CompName:2-Deoxy-glucose-4TMS(1) ; (2S,4S,5S,6S)-6-(hydroxymethyl)oxane-2,4,5-triol

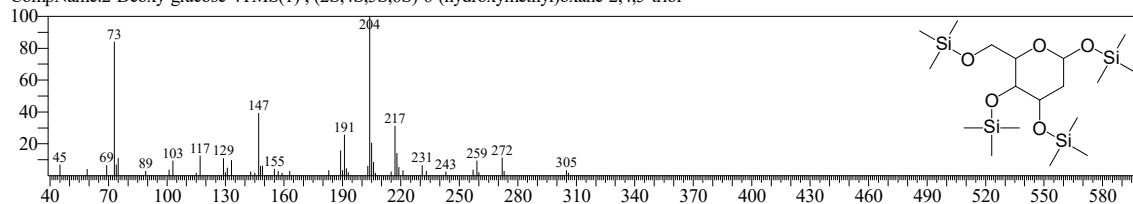

Hit#:5 Entry:179 Library:OA\_TMS\_DB5\_67min\_V3.lib

SI:29 Formula:C<sub>13</sub>H<sub>22</sub>O<sub>3</sub>Si<sub>2</sub> CAS:99-06-9 MolWeight:282 RetIndex:1572

CompName:3-Hydroxybenzoic acid-2TMS ; 3-hydroxybenzoic acid

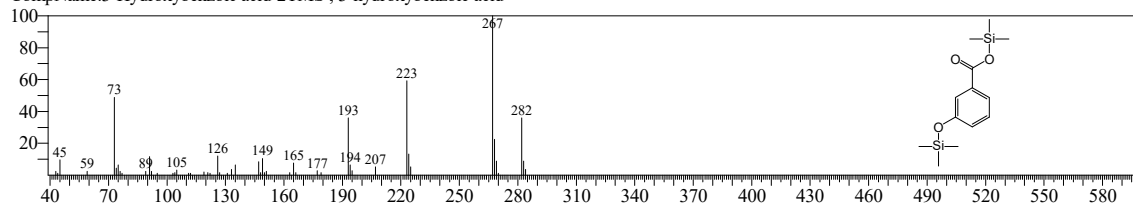

# TNAU

<< Target >>

Line#:20 R.Time:29.950(Scan#:5091) MassPeaks:324

RawMode:Averaged 29.945-29.955(5090-5092) BasePeak:207.00(1426)

BG Mode:Calc. from Peak Group 1 - Event 1 Q3 Scan

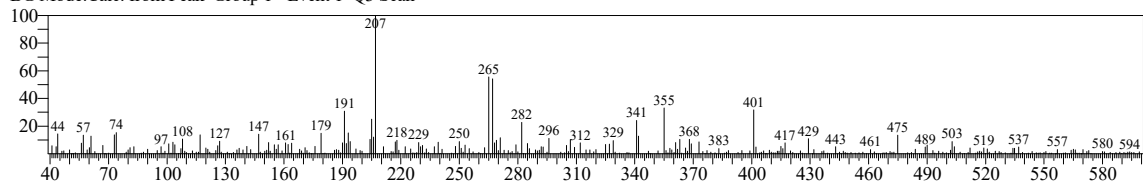

Hit#:1 Entry:345 Library:OA\_TMS\_DB5\_67min\_V3.lib

SI:40 Formula:C<sub>21</sub>H<sub>52</sub>O<sub>6</sub>Si<sub>5</sub> CAS:59-23-4 MolWeight:540 RetIndex:1868

CompName:Galactose-5TMS(2) ; (3R,4S,5R,6R)-6-(hydroxymethyl)oxane-2,3,4,5-tetrol

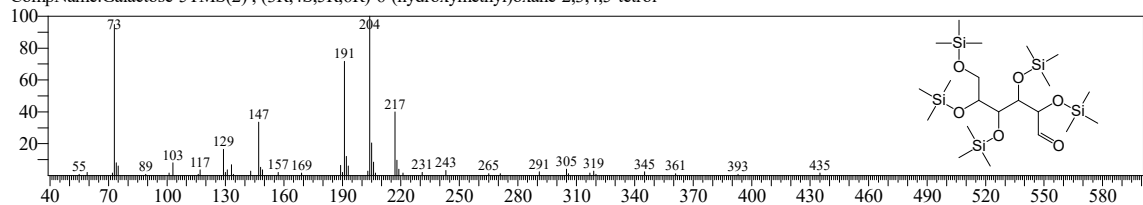

Hit#:2 Entry:386 Library:OA\_TMS\_DB5\_67min\_V3.lib

SI:40 Formula:C<sub>21</sub>H<sub>52</sub>O<sub>6</sub>Si<sub>5</sub> CAS:50-99-7 MolWeight:540 RetIndex:1922

CompName:Glucose-5TMS(1) ; (3R,4S,5S,6R)-6-(hydroxymethyl)oxane-2,3,4,5-tetrol

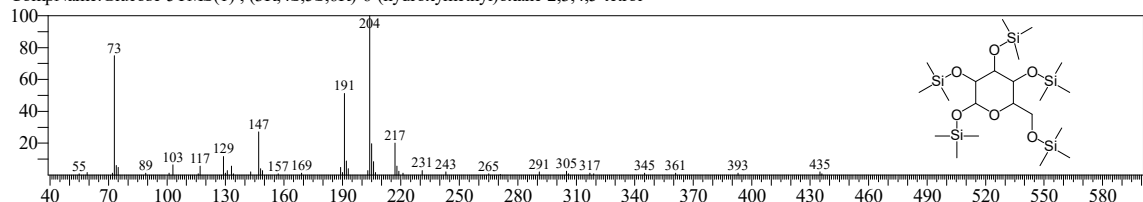

Hit#:3 Entry:252 Library:OA\_TMS\_DB5\_67min\_V3.lib

SI:39 Formula:C<sub>18</sub>H<sub>44</sub>O<sub>5</sub>Si<sub>4</sub> CAS:3615-37-0 MolWeight:452 RetIndex:1695

CompName:Fucose-4TMS(1) ; (2S,3R,4S,5R,6R)-6-methyloxane-2,3,4,5-tetrol

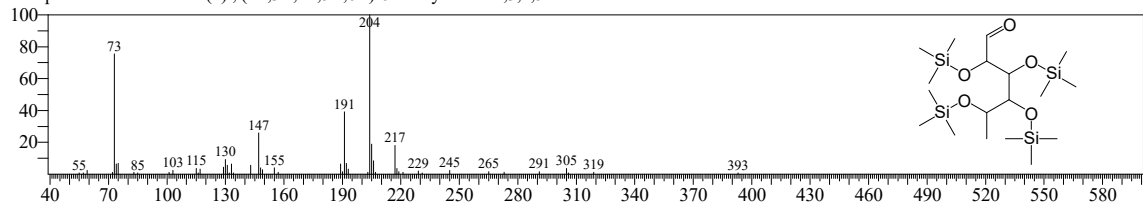

Hit#:4 Entry:402 Library:OA\_TMS\_DB5\_67min\_V3.lib

SI:39 Formula:C<sub>20</sub>H<sub>42</sub>O<sub>4</sub>Si<sub>4</sub> CAS:775-01-9 MolWeight:458 RetIndex:1942

CompName:3,4-Dihydroxymandelic acid-4TMS ; 2-(3,4-dihydroxyphenyl)-2-hydroxyacetic acid

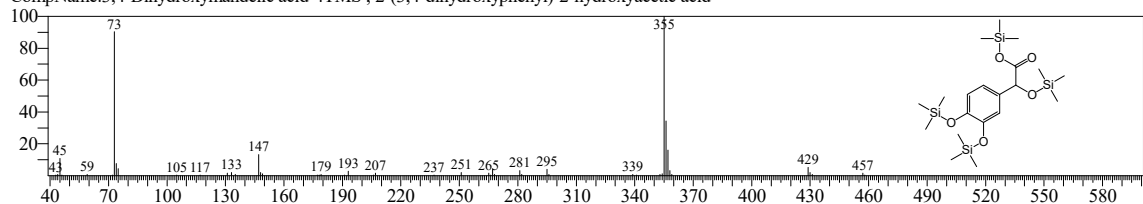

Hit#:5 Entry:349 Library:OA\_TMS\_DB5\_67min\_V3.lib

SI:38 Formula:C<sub>21</sub>H<sub>52</sub>O<sub>6</sub>Si<sub>5</sub> CAS:2595-97-3 MolWeight:540 RetIndex:1874

CompName:Allose-5TMS ; (2R,3R,4R,5R)-2,3,4,5,6-pentahydroxyhexanal

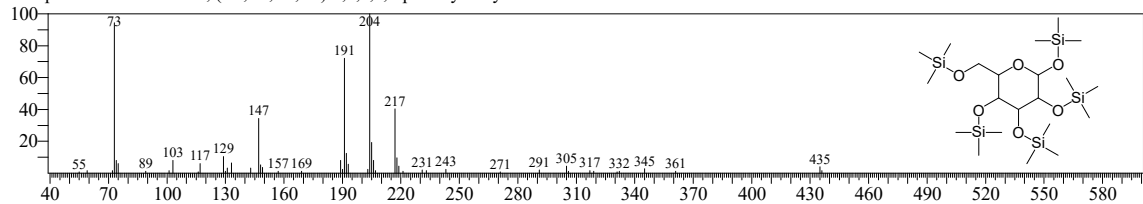

# TNAU

<< Target >>

Line#:21 R.Time:29.995(Scan#:5100) MassPeaks:319

RawMode:Averaged 29.990-30.000(5099-5101) BasePeak:207.05(759)

BG Mode:Calc. from Peak Group 1 - Event 1 Q3 Scan

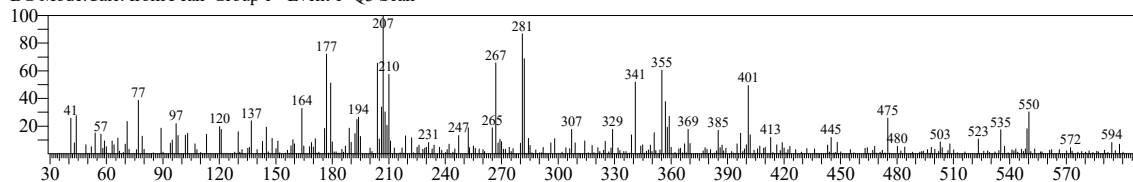

Hit#:1 Entry:402 Library:OA\_TMS\_DB5\_67min\_V3.lib

SI:28 Formula:C20H42O4Si4 CAS:775-01-9 MolWeight:458 RetIndex:1942

CompName:3,4-Dihydroxymandelic acid-4TMS ; 2-(3,4-dihydroxyphenyl)-2-hydroxyacetic acid

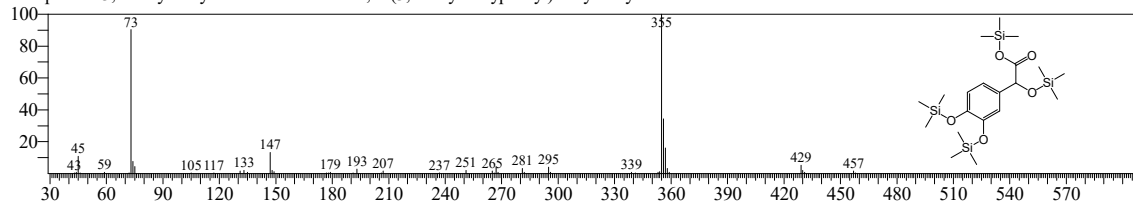

Hit#:2 Entry:179 Library:OA\_TMS\_DB5\_67min\_V3.lib

SI:25 Formula:C13H22O3Si2 CAS:99-06-9 MolWeight:282 RetIndex:1572

CompName:3-Hydroxybenzoic acid-2TMS ; 3-hydroxybenzoic acid

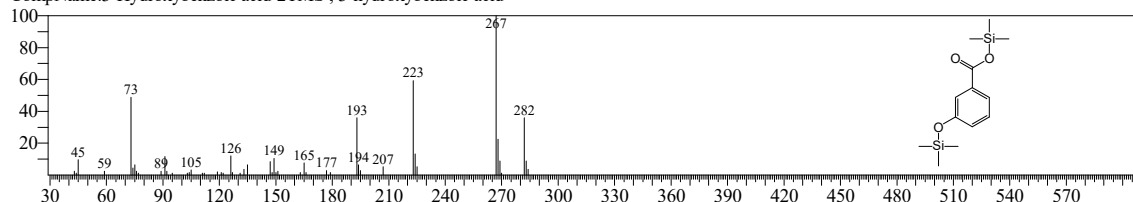

Hit#:3 Entry:315 Library:OA\_TMS\_DB5\_67min\_V3.lib

SI:25 Formula:C16H30O4Si3 CAS:99-50-3 MolWeight:370 RetIndex:1833

CompName:Protocatechuic acid-3TMS ; 3,4-dihydroxybenzoic acid

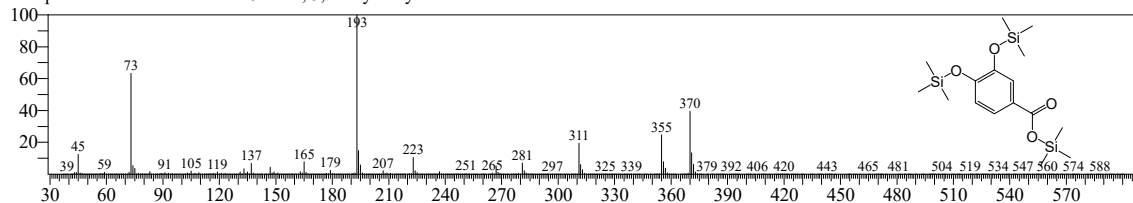

Hit#:4 Entry:211 Library:OA\_TMS\_DB5\_67min\_V3.lib

SI:24 Formula:C13H22O3Si2 CAS:99-96-7 MolWeight:282 RetIndex:1636

CompName:4-Hydroxybenzoic acid-2TMS ; 4-hydroxybenzoic acid

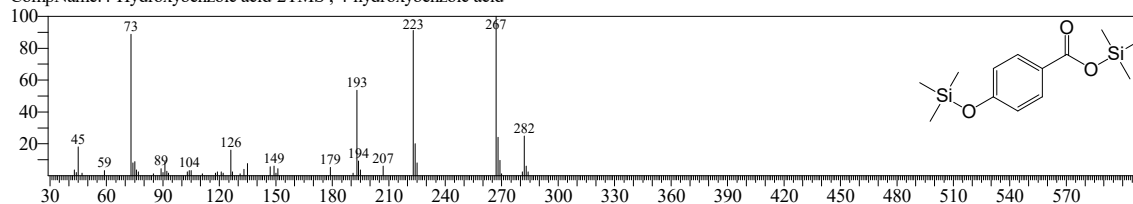

Hit#:5 Entry:341 Library:OA\_TMS\_DB5\_67min\_V3.lib

SI:24 Formula:C18H34O4Si3 CAS:3247-75-4 MolWeight:398 RetIndex:1864

CompName:3-(3-Hydroxyphenyl)-3-hydroxypropionic acid-3TMS ; 3-hydroxy-3-(3-hydroxyphenyl)propanoic acid



# TNAU

<< Target >>

Line#:22 R.Time:30.100(Scan#:5121) MassPeaks:332

RawMode:Averaged 30.095-30.105(5120-5122) BasePeak:207.05(1149)

BG Mode:Calc. from Peak Group 1 - Event 1 Q3 Scan

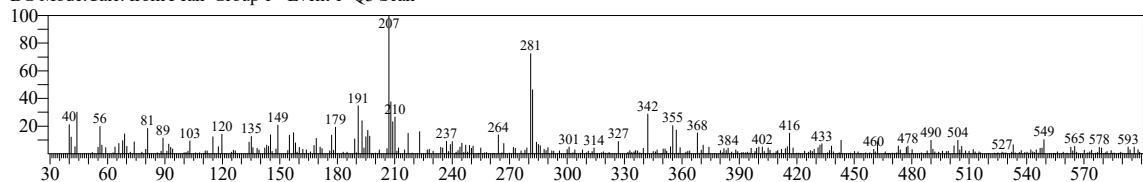

Hit#:1 Entry:315 Library:OA\_TMS\_DB5\_67min\_V3.lib

SI:28 Formula:C16H30O4Si3 CAS:99-50-3 MolWeight:370 RetIndex:1833

CompName:Protocatechuic acid-3TMS ; 3,4-dihydroxybenzoic acid

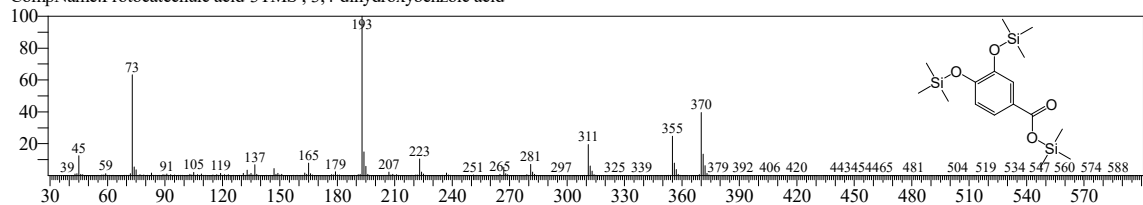

Hit#:2 Entry:402 Library:OA\_TMS\_DB5\_67min\_V3.lib

SI:27 Formula:C20H42O4Si4 CAS:775-01-9 MolWeight:458 RetIndex:1942

CompName:3,4-Dihydroxymandelic acid-4TMS ; 2-(3,4-dihydroxyphenyl)-2-hydroxyacetic acid

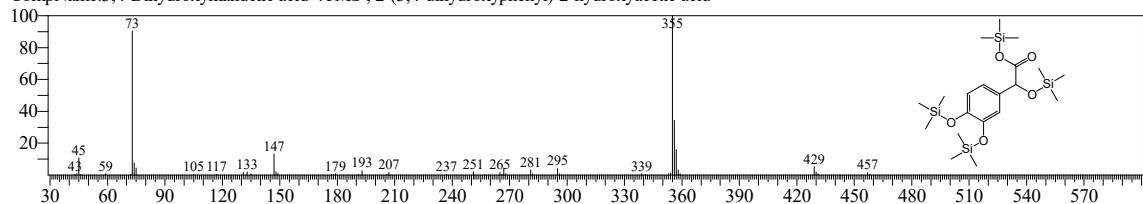

Hit#:3 Entry:166 Library:OA\_TMS\_DB5\_67min\_V3.lib

SI:24 Formula:C12H16O4Si CAS:50-78-2 MolWeight:252 RetIndex:1540

CompName:Acetylsalicylic acid-TMS ; 2-acetoxybenzoic acid

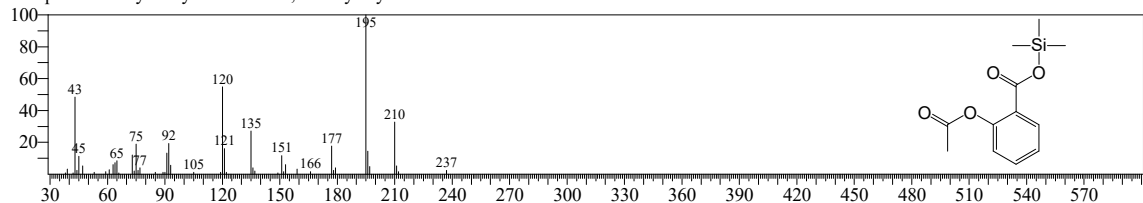

Hit#:4 Entry:382 Library:OA\_TMS\_DB5\_67min\_V3.lib

SI:24 Formula:C18H34O4Si3 CAS:6482-98-0 MolWeight:398 RetIndex:1918

CompName:4-Hydroxyphenyllactic acid-3TMS ; 2-hydroxy-3-(4-hydroxyphenyl)propanoate



Hit#:5 Entry:395 Library:OA\_TMS\_DB5\_67min\_V3.lib

SI:21 Formula:C10H16N4O2Si CAS:58-55-9 MolWeight:252 RetIndex:1936

CompName:Theophylline-TMS ; 1,3-dimethyl-7H-purine-2,6-dione

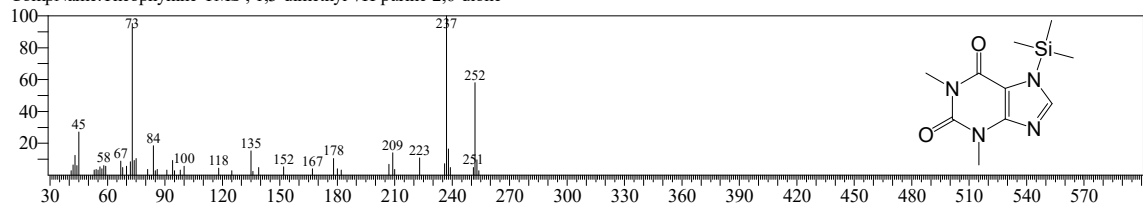



<< Target >>

Line#:23 R.Time:30.190(Scan#:5139) MassPeaks:317

RawMode:Averaged 30.185-30.195(5138-5140) BasePeak:207.05(2264)

BG Mode:Calc. from Peak Group 1 - Event 1 Q3 Scan

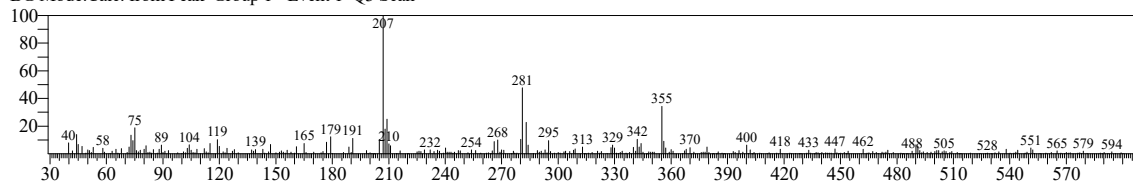

Hit#:1 Entry:343 Library:OA\_TMS\_DB5\_67min\_V3.lib

SI:48 Formula:C18H37NO3Si3 CAS:51-43-4 MolWeight:399 RetIndex:1868

CompName:Epinephrine-3TMS ; 4-[(1R)-1-hydroxy-2-(methylamino)ethyl]benzene-1,2-diol

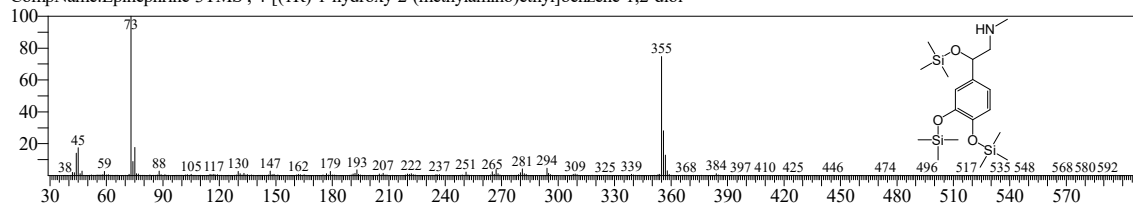

Hit#:2 Entry:402 Library:OA\_TMS\_DB5\_67min\_V3.lib

SI:43 Formula:C20H42O4Si4 CAS:775-01-9 MolWeight:458 RetIndex:1942

CompName:3,4-Dihydroxymandelic acid-4TMS ; 2-(3,4-dihydroxyphenyl)-2-hydroxyacetic acid

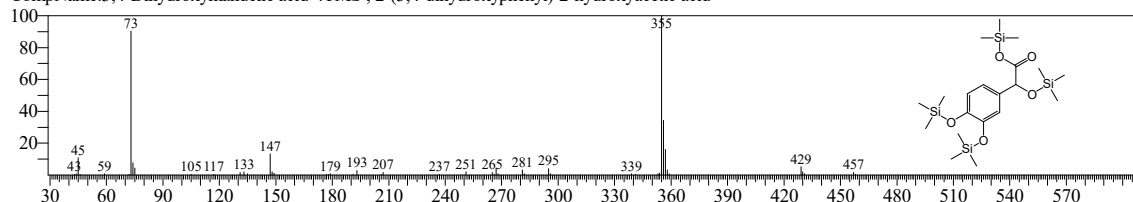

Hit#:3 Entry:384 Library:OA\_TMS\_DB5\_67min\_V3.lib

SI:42 Formula:C17H35NO3Si3 CAS:65-23-6 MolWeight:385 RetIndex:1919

CompName:Pyridoxine-3TMS ; 4,5-bis(hydroxymethyl)-2-methylpyridin-3-ol

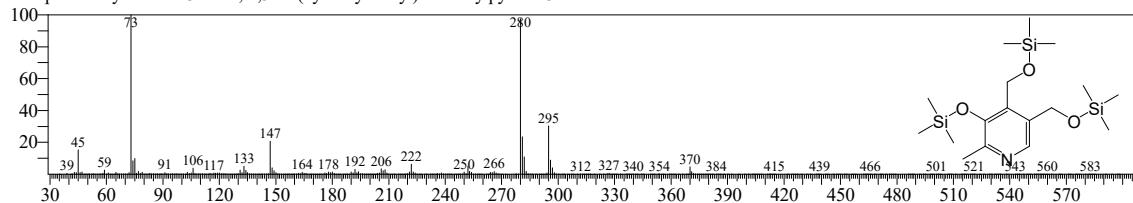

Hit#:4 Entry:418 Library:OA\_TMS\_DB5\_67min\_V3.lib

SI:41 Formula:C17H36N2O2Si3 CAS:85-87-0 MolWeight:384 RetIndex:1964

CompName:Pyridoxamine-3TMS ; 4-(aminomethyl)-5-(hydroxymethyl)-2-methylpyridin-3-ol

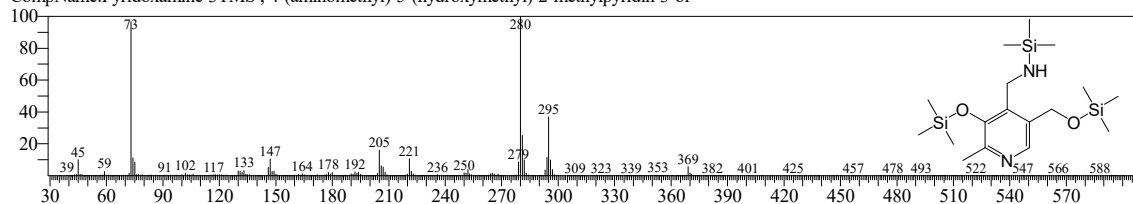

Hit#:5 Entry:382 Library:OA\_TMS\_DB5\_67min\_V3.lib

SI:39 Formula:C18H34O4Si3 CAS:6482-98-0 MolWeight:398 RetIndex:1918

CompName:4-Hydroxyphenyllactic acid-3TMS ; 2-hydroxy-3-(4-hydroxyphenyl)propanoate

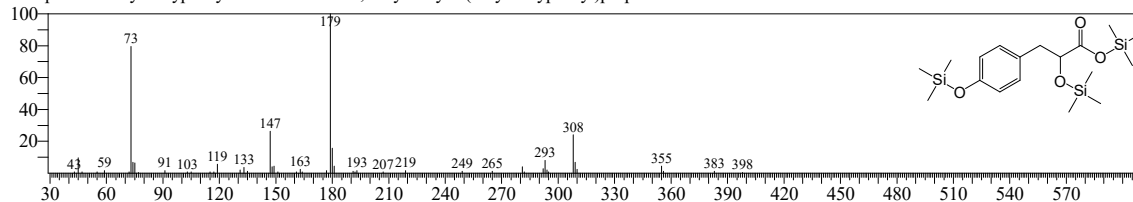

# TNAU

<< Target >>

Line#:24 R.Time:30.290(Scan#:5159) MassPeaks:282

RawMode:Averaged 30.285-30.295(5158-5160) BasePeak:207.05(2168)

BG Mode:Calc. from Peak Group 1 - Event 1 Q3 Scan

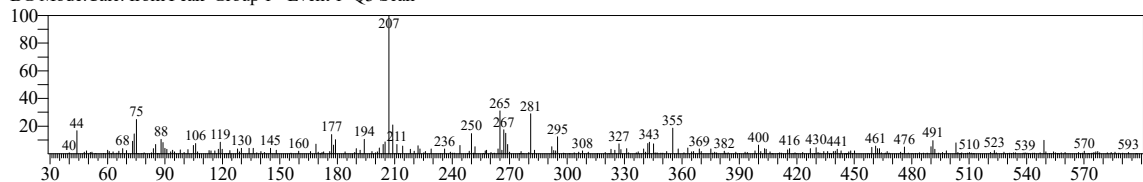

Hit#:1 Entry:343 Library:OA TMS DB5\_67min\_V3.lib

SI:42 Formula:C18H37NO3Si3 CAS:51-43-4 MolWeight:399 RetIndex:1868

CompName:Epinephrine-3-TMS ; 4-[(1R)-1-hydroxy-2-(methylamino)ethyl]benzene-1,2-diol

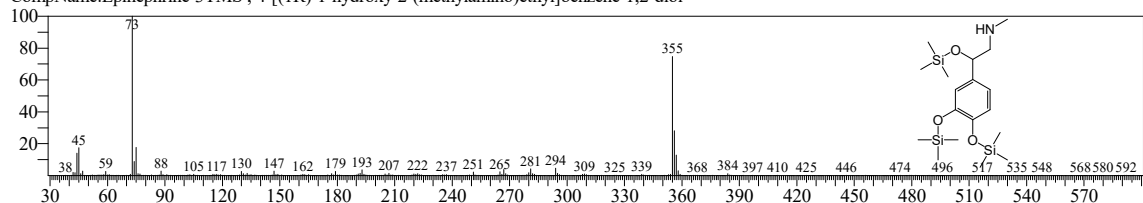

Hit#:2 Entry:294 Library:OA TMS DB5\_67min\_V3.lib

SI:39 Formula:C15H26O4Si2 CAS:306-08-1 MolWeight:326 RetIndex:1782

CompName:Homovanillic acid-2TMS ; 2-(4-hydroxy-3-methoxyphenyl)acetic acid

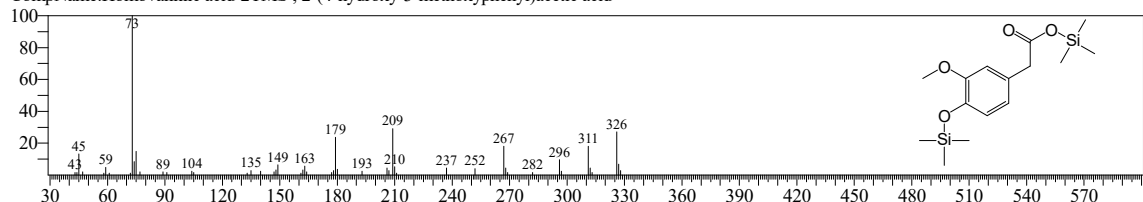

Hit#:3 Entry:402 Library:OA TMS DB5\_67min\_V3.lib

SI:37 Formula:C20H42O4Si4 CAS:775-01-9 MolWeight:458 RetIndex:1942

CompName:3,4-Dihydroxymandelic acid-4TMS ; 2-(3,4-dihydroxyphenyl)-2-hydroxyacetic acid

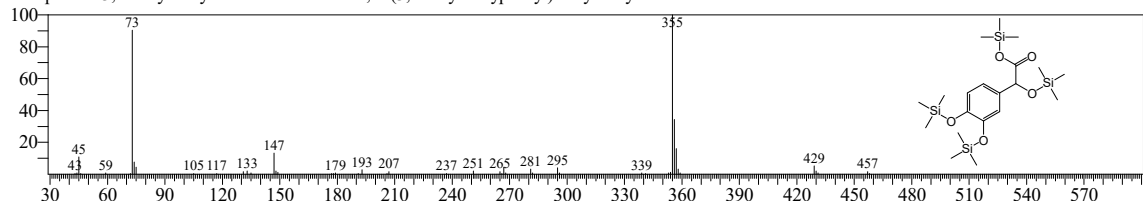

Hit#:4 Entry:341 Library:OA TMS DB5\_67min\_V3.lib

SI:35 Formula:C18H34O4Si3 CAS:3247-75-4 MolWeight:398 RetIndex:1864

CompName:3-(3-Hydroxyphenyl)-3-hydroxypropionic acid-3TMS ; 3-hydroxy-3-(3-hydroxyphenyl)propanoic acid

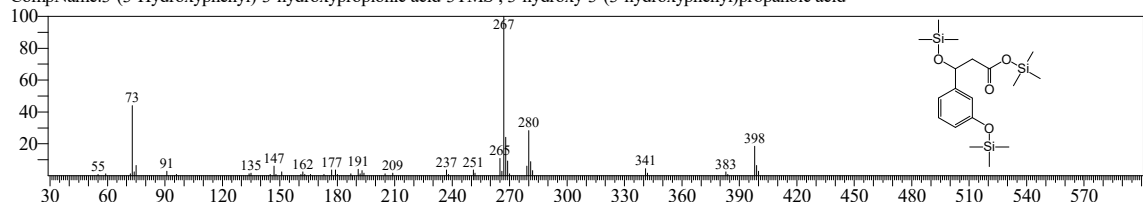

Hit#:5 Entry:328 Library:OA TMS DB5\_67min\_V3.lib

SI:35 Formula:C13H23NO2Si2 CAS:150-13-0 MolWeight:281 RetIndex:1845

CompName:4-Aminobenzoic acid-2TMS ; 4-aminobenzoic acid

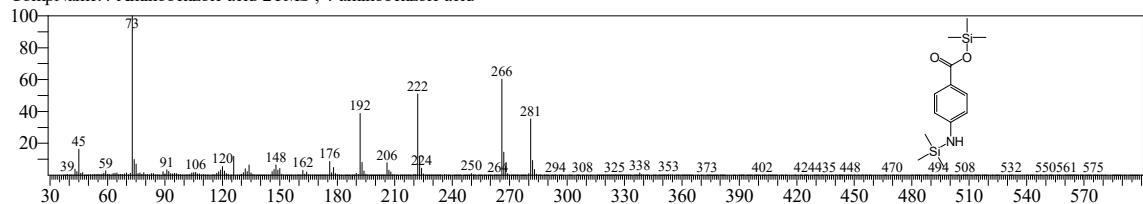

# TNAU

<< Target >>

Line#:25 R.Time:30.375(Scan#:5176) MassPeaks:294

RawMode:Averaged 30.370-30.380(5175-5177) BasePeak:207.00(2223)

BG Mode:Calc. from Peak Group 1 - Event 1 Q3 Scan

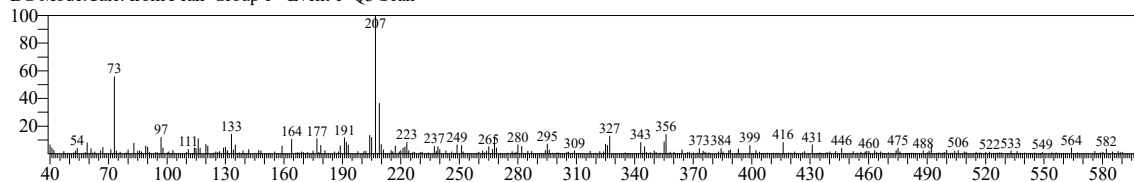

Hit#:1 Entry:219 Library:OA\_TMS\_DB5\_67min\_V3.lib

SI:44 Formula:C18H44O5Si4 CAS:10485-94-6 MolWeight:452 RetIndex:1646

CompName:Rhamnose-4TMS(1) ; (2R,3R,4S,5S)-2,3,4,5-tetrahydroxyhexanal

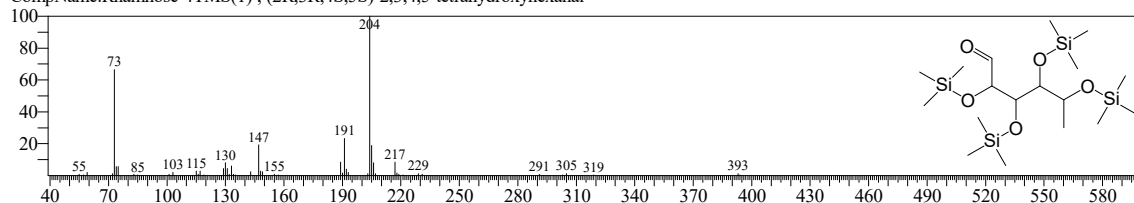

Hit#:2 Entry:294 Library:OA\_TMS\_DB5\_67min\_V3.lib

SI:44 Formula:C15H26O4Si2 CAS:306-08-1 MolWeight:326 RetIndex:1782

CompName:Homovanillic acid-2TMS ; 2-(4-hydroxy-3-methoxyphenyl)acetic acid

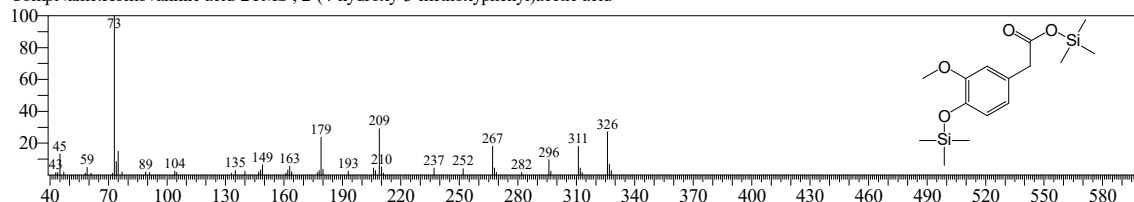

Hit#:3 Entry:205 Library:OA\_TMS\_DB5\_67min\_V3.lib

SI:44 Formula:C17H42O5Si4 CAS:1114-34-7 MolWeight:438 RetIndex:1624

CompName:Lyxose-4TMS(1) ; (2S,3S,4R)-2,3,4,5-tetrahydroxypentanal

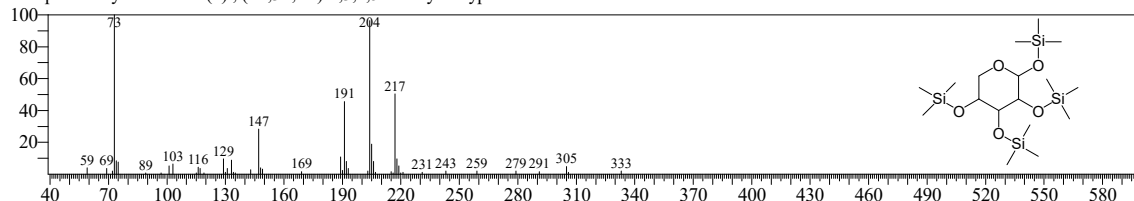

Hit#:4 Entry:252 Library:OA\_TMS\_DB5\_67min\_V3.lib

SI:43 Formula:C18H44O5Si4 CAS:3615-37-0 MolWeight:452 RetIndex:1695

CompName:Fucose-4TMS(1) ; (2S,3R,4S,5R,6R)-6-methyloxane-2,3,4,5-tetrol

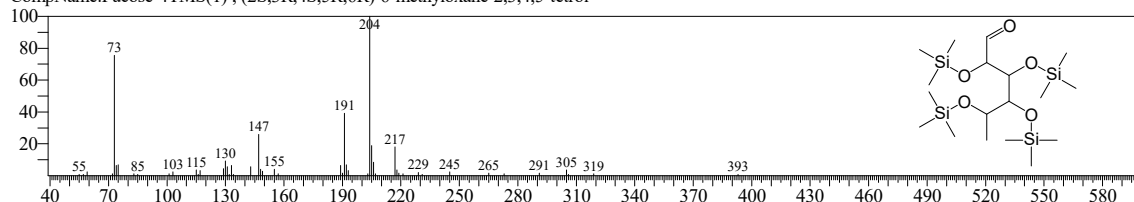

Hit#:5 Entry:232 Library:OA\_TMS\_DB5\_67min\_V3.lib

SI:43 Formula:C17H42O5Si4 CAS:10323-20-3 MolWeight:438 RetIndex:1667

CompName:Arabinose-4TMS(2) ; (2S,3R,4R)-2,3,4,5-tetrahydroxypentanal

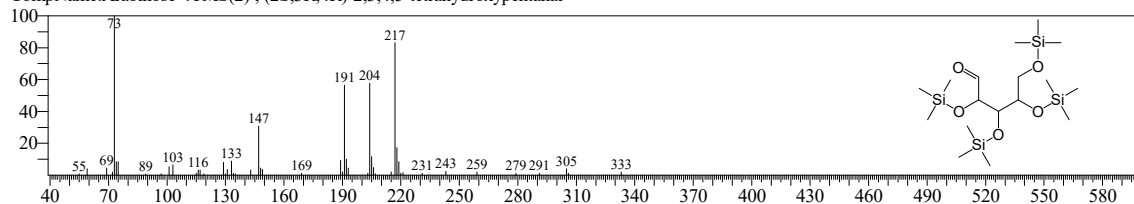

<< Target >>

Line#:26 R.Time:30.415(Scan#:5184) MassPeaks:270

RawMode:Averaged 30.410-30.420(5183-5185) BasePeak:207.05(2761)

BG Mode:Calc. from Peak Group 1 - Event 1 Q3 Scan

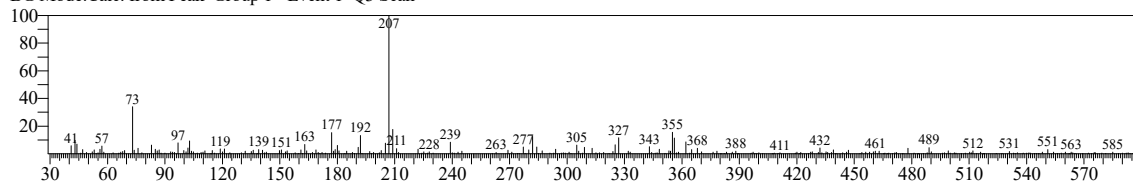

Hit#:1 Entry:343 Library:OA\_TMS\_DB5\_67min\_V3.lib

SI:43 Formula:C18H37NO3Si3 CAS:51-43-4 MolWeight:399 RetIndex:1868

CompName:Epinephrine-3TMS ; 4-[(1R)-1-hydroxy-2-(methylamino)ethyl]benzene-1,2-diol

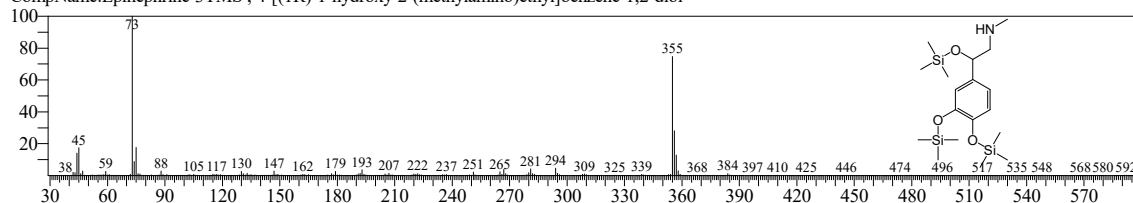

Hit#:2 Entry:382 Library:OA\_TMS\_DB5\_67min\_V3.lib

SI:40 Formula:C18H34O4Si3 CAS:6482-98-0 MolWeight:398 RetIndex:1918

CompName:4-Hydroxyphenyllactic acid-3TMS ; 2-hydroxy-3-(4-hydroxyphenyl)propanoate

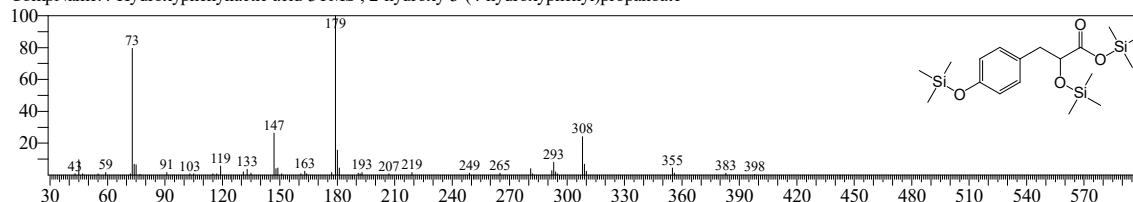

Hit#:3 Entry:402 Library:OA\_TMS\_DB5\_67min\_V3.lib

SI:38 Formula:C20H42O4Si4 CAS:775-01-9 MolWeight:458 RetIndex:1942

CompName:3,4-Dihydroxymandelic acid-4TMS ; 2-(3,4-dihydroxyphenyl)-2-hydroxyacetic acid

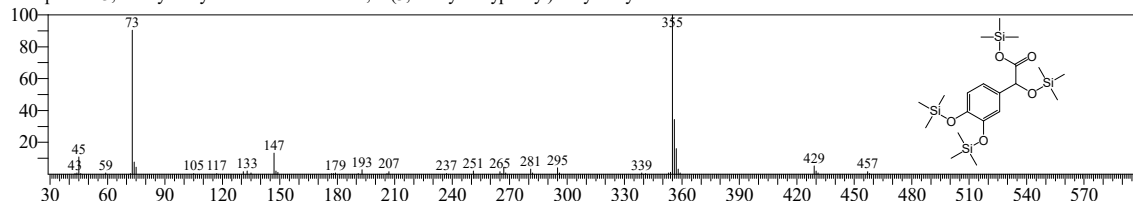

Hit#:4 Entry:294 Library:OA\_TMS\_DB5\_67min\_V3.lib

SI:37 Formula:C15H26O4Si2 CAS:306-08-1 MolWeight:326 RetIndex:1782

CompName:Homovanillic acid-2TMS ; 2-(4-hydroxy-3-methoxyphenyl)acetic acid

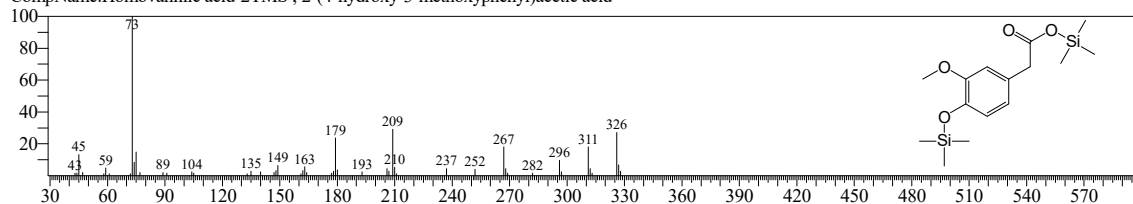

Hit#:5 Entry:290 Library:OA\_TMS\_DB5\_67min\_V3.lib

SI:35 Formula:C13H23NO3Si2 CAS:548-93-6 MolWeight:297 RetIndex:1773

CompName:3-Hydroxyanthranilic acid-2TMS ; 2-amino-3-hydroxybenzoic acid



# TNAU

<< Target >>

Line#:27 R.Time:30.645(Scan#:5230) MassPeaks:279

RawMode:Averaged 30.640-30.650(5229-5231) BasePeak:208.05(683)

BG Mode:Calc. from Peak Group 1 - Event 1 Q3 Scan

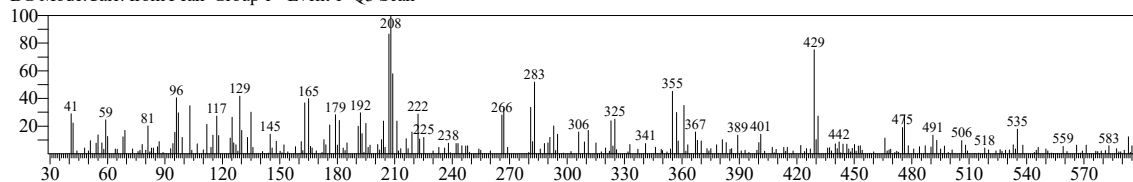

Hit#:1 Entry:506 Library:OA\_TMS\_DB5\_67min\_V3.lib

SI:23 Formula:C19H36N2O4Si3 CAS:2147-61-7 MolWeight:440 RetIndex:2375

CompName:3-Hydroxy-kynurenine-3-TMS ; 2-amino-4-(2-amino-3-hydroxyphenyl)-4-oxobutanoic acid

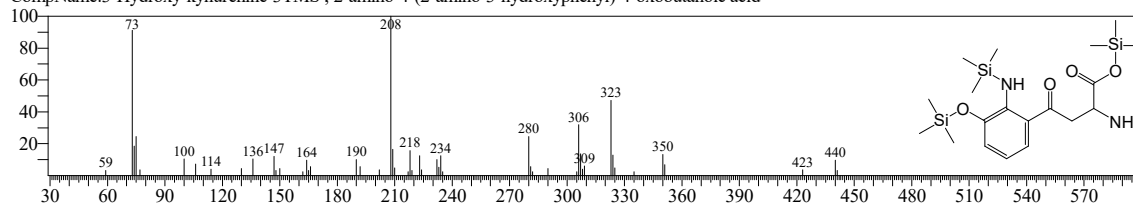

Hit#:2 Entry:442 Library:OA\_TMS\_DB5\_67min\_V3.lib

SI:22 Formula:C19H38O2Si CAS:373-49-9 MolWeight:326 RetIndex:2028

CompName:Palmitoleic acid-TMS ; hexadec-9-enoic acid

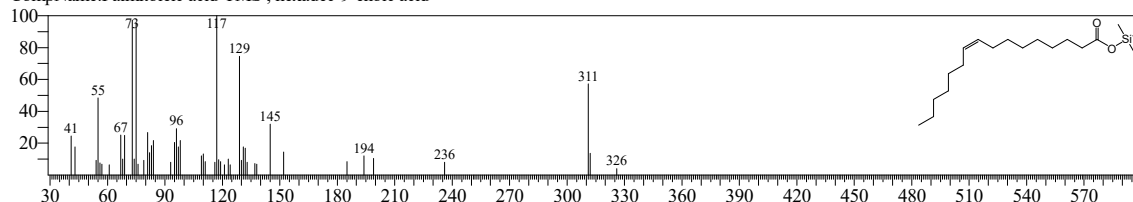

Hit#:3 Entry:315 Library:OA\_TMS\_DB5\_67min\_V3.lib

SI:22 Formula:C16H30O4Si3 CAS:99-50-3 MolWeight:370 RetIndex:1833

CompName:Protocatechuic acid-3TMS ; 3,4-dihydroxybenzoic acid



Hit#:4 Entry:402 Library:OA\_TMS\_DB5\_67min\_V3.lib

SI:22 Formula:C20H42O4Si4 CAS:775-01-9 MolWeight:458 RetIndex:1942

CompName:3,4-Dihydroxymandelic acid-4TMS ; 2-(3,4-dihydroxyphenyl)-2-hydroxyacetic acid

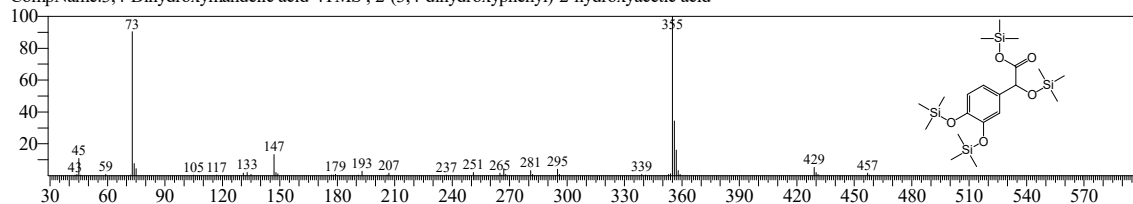

Hit#:5 Entry:203 Library:OA\_TMS\_DB5\_67min\_V3.lib

SI:22 Formula:C13H23NO2Si2 CAS:118-92-3 MolWeight:281 RetIndex:1623

CompName:Anthranilic acid-2TMS ; 2-aminobenzoic acid

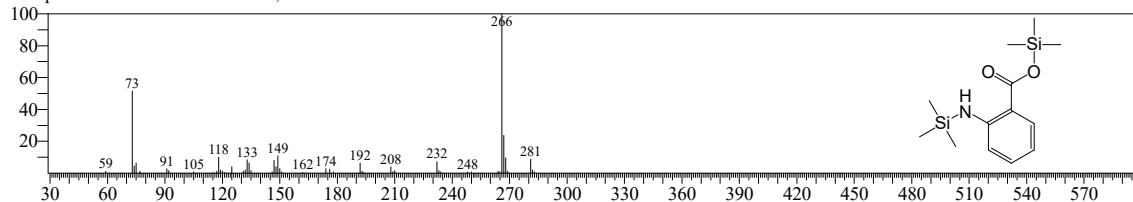

# TNAU

<< Target >>

Line#:28 R.Time:30.810(Scan#:5263) MassPeaks:299

RawMode:Averaged 30.805-30.815(5262-5264) BasePeak:207.05(2698)

BG Mode:Calc. from Peak Group 1 - Event 1 Q3 Scan

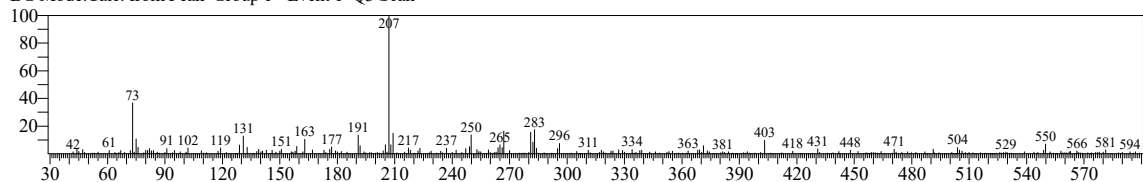

Hit#:1 Entry:328 Library:OA\_TMS\_DB5\_67min\_V3.lib

SI:44 Formula:C13H23NO2Si2 CAS:150-13-0 MolWeight:281 RetIndex:1845

CompName:4-Aminobenzoic acid-2TMS ; 4-aminobenzoic acid

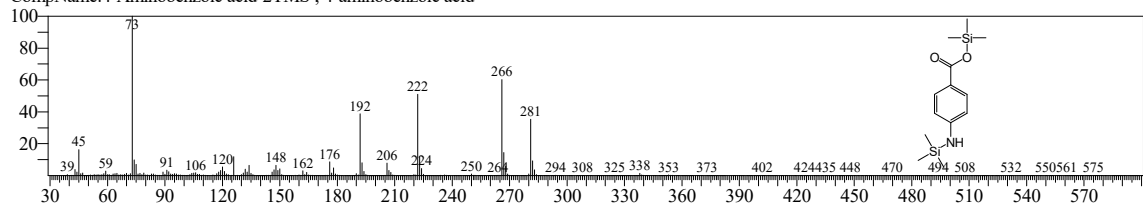

Hit#:2 Entry:384 Library:OA\_TMS\_DB5\_67min\_V3.lib

SI:42 Formula:C17H35NO3Si3 CAS:65-23-6 MolWeight:385 RetIndex:1919

CompName:Pyridoxine-3TMS ; 4,5-bis(hydroxymethyl)-2-methylpyridin-3-ol

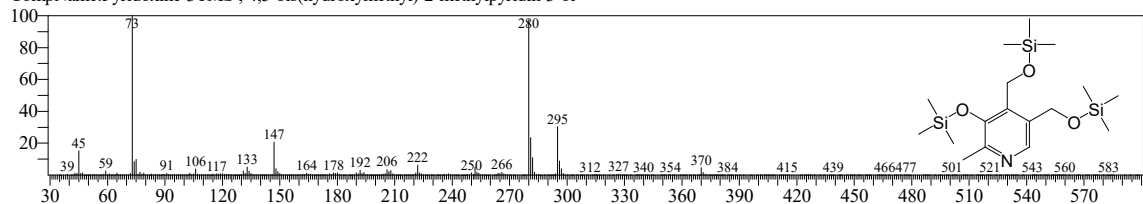

Hit#:3 Entry:179 Library:OA\_TMS\_DB5\_67min\_V3.lib

SI:42 Formula:C13H22O3Si2 CAS:99-06-9 MolWeight:282 RetIndex:1572

CompName:3-Hydroxybenzoic acid-2TMS ; 3-hydroxybenzoic acid

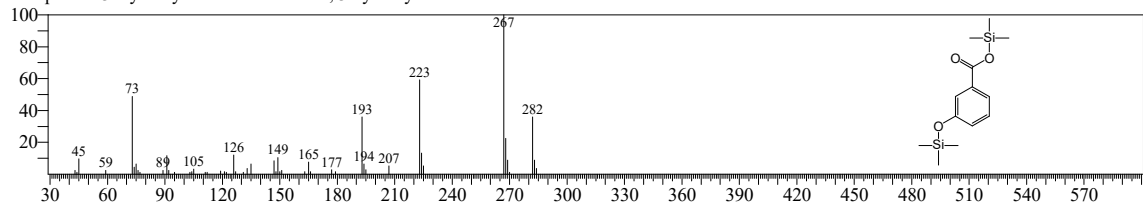

Hit#:4 Entry:211 Library:OA\_TMS\_DB5\_67min\_V3.lib

SI:41 Formula:C13H22O3Si2 CAS:99-96-7 MolWeight:282 RetIndex:1636

CompName:4-Hydroxybenzoic acid-2TMS ; 4-hydroxybenzoic acid

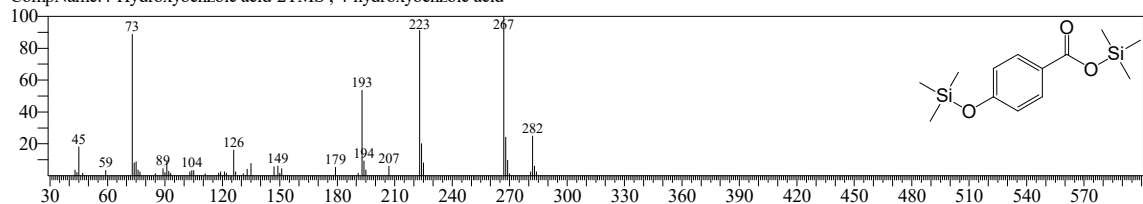

Hit#:5 Entry:203 Library:OA\_TMS\_DB5\_67min\_V3.lib

SI:41 Formula:C13H23NO2Si2 CAS:118-92-3 MolWeight:281 RetIndex:1623

CompName:Anthranilic acid-2TMS ; 2-aminobenzoic acid

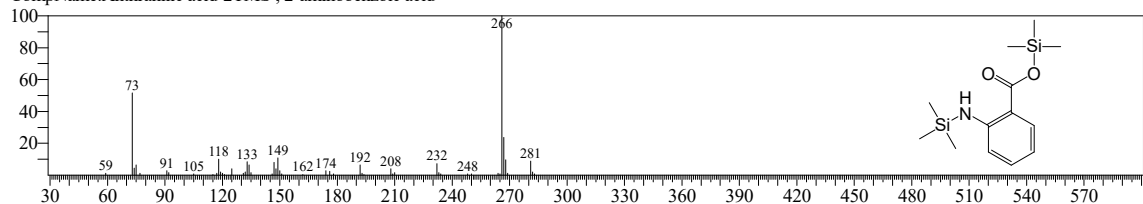

# TNAU

<< Target >>

Line#:29 R.Time:31.850(Scan#:5471) MassPeaks:287

RawMode:Averaged 31.845-31.855(5470-5472) BasePeak:103.00(580)

BG Mode:Calc. from Peak Group 1 - Event 1 Q3 Scan

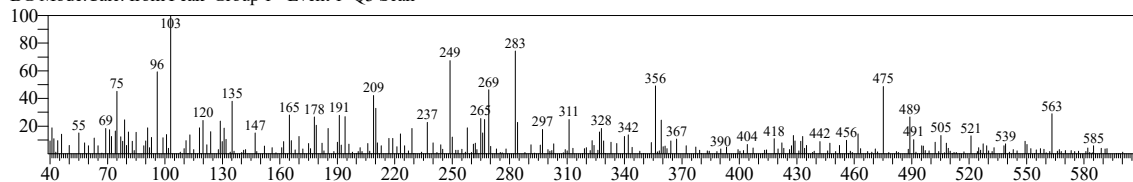

Hit#:1 Entry:477 Library:OA\_TMS\_DB5\_67min\_V3.lib

SI:28 Formula:C21H46OSi CAS:112-92-5 MolWeight:342 RetIndex:2156

CompName:Octadecanol-TMS ; octadecan-1-ol

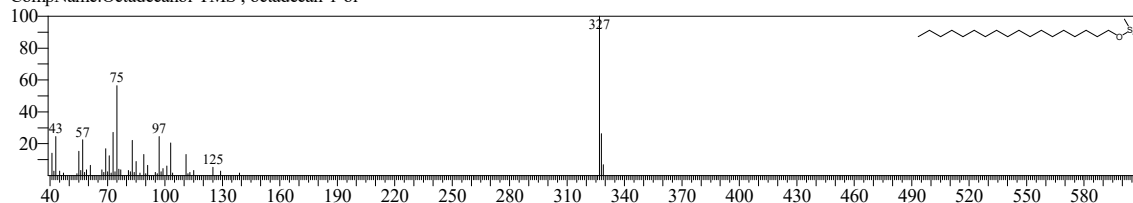

Hit#:2 Entry:211 Library:OA\_TMS\_DB5\_67min\_V3.lib

SI:27 Formula:C13H22O3Si2 CAS:99-96-7 MolWeight:282 RetIndex:1636

CompName:4-Hydroxybenzoic acid-2TMS ; 4-hydroxybenzoic acid

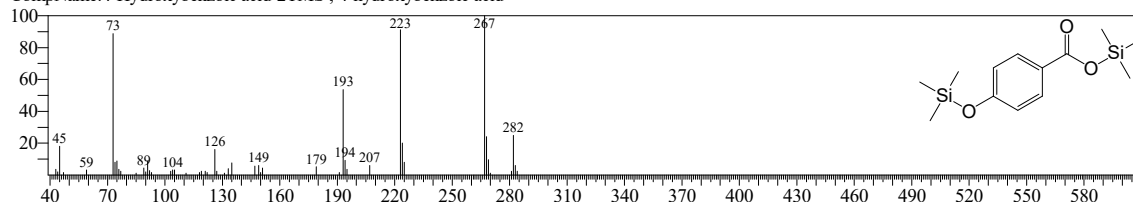

Hit#:3 Entry:179 Library:OA\_TMS\_DB5\_67min\_V3.lib

SI:26 Formula:C13H22O3Si2 CAS:99-06-9 MolWeight:282 RetIndex:1572

CompName:3-Hydroxybenzoic acid-2TMS ; 3-hydroxybenzoic acid

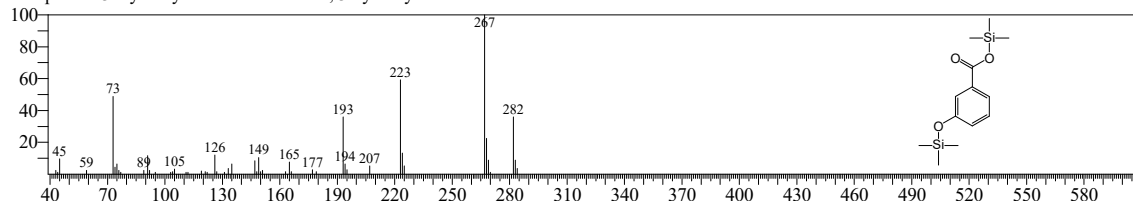

Hit#:4 Entry:22 Library:FA\_ME\_SP2560\_EI\_V3.lib

SI:26 Formula:C21H42O2 CAS:506-30-9 MolWeight:326 RetIndex:2809

CompName:Methyl arachisate ; Icosanoic acid

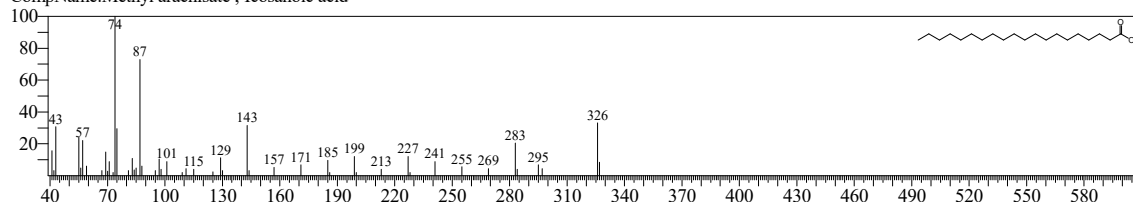

Hit#:5 Entry:35 Library:FA\_ME\_SP2560\_EI\_V3.lib

SI:26 Formula:C25H50O2 CAS:557-59-5 MolWeight:382 RetIndex:3201

CompName:Methyl lignocerate ; Tetracosanoic acid

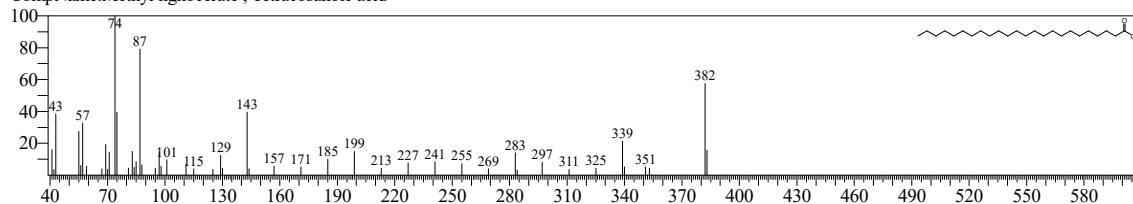

# TNAU

<< Target >>

Line#:30 R.Time:31.895(Scan#:5480) MassPeaks:299

RawMode:Averaged 31.890-31.900(5479-5481) BasePeak:207.00(1167)

BG Mode:Calc. from Peak Group 1 - Event 1 Q3 Scan

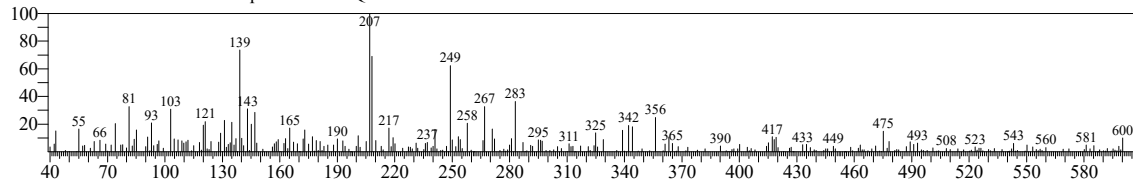

Hit#:1 Entry:567 Library:OA\_TMS\_DB5\_67min\_V3.lib

SI:27 Formula:C30H54OSi CAS:57-88-5 MolWeight:458 RetIndex:3221

CompName:Cholesterol-TMS ; (3S,8S,9S,10R,13R,14S,17R)-10,13-dimethyl-17-[(2R)-6-methylheptan-2-yl]-2,3,4,7,8,9,11,12,14,15,16,17-dodec

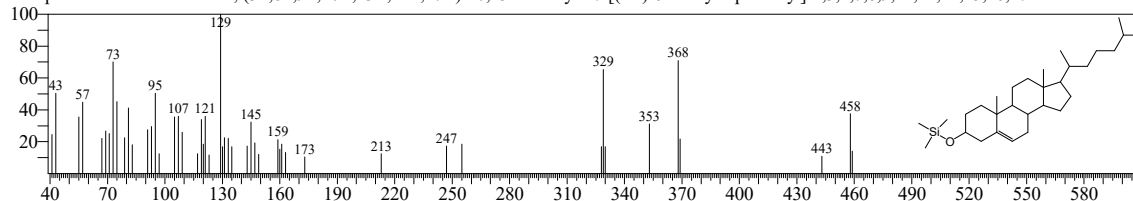

Hit#:2 Entry:58 Library:OA\_TMS\_DB5\_67min\_V3.lib

SI:24 Formula:C11H26O3Si2 CAS:4374-62-3 MolWeight:262 RetIndex:1234

CompName:Ethylhydracrylic acid-2TMS ; 2-(hydroxymethyl)butanoic acid

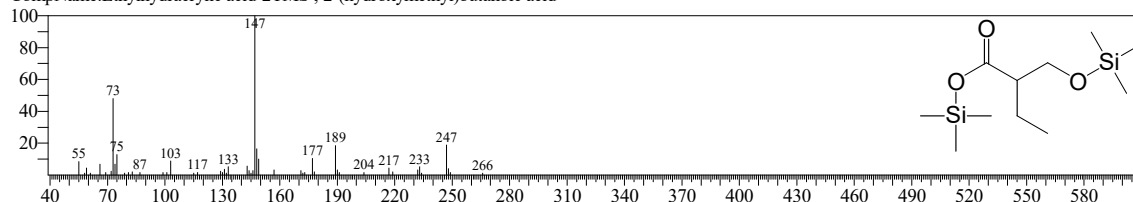

Hit#:3 Entry:179 Library:OA\_TMS\_DB5\_67min\_V3.lib

SI:24 Formula:C13H22O3Si2 CAS:99-06-9 MolWeight:282 RetIndex:1572

CompName:3-Hydroxybenzoic acid-2TMS ; 3-hydroxybenzoic acid

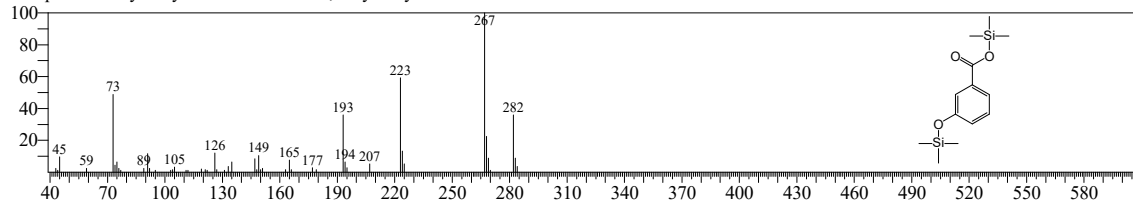

Hit#:4 Entry:35 Library:FA\_ME\_SP2560\_EI\_V3.lib

SI:22 Formula:C25H50O2 CAS:557-59-5 MolWeight:382 RetIndex:3201

CompName:Methyl lignocerate ; Tetracosanoic acid

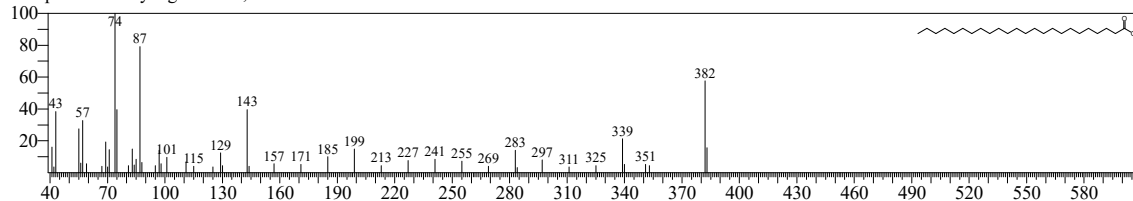

Hit#:5 Entry:211 Library:OA\_TMS\_DB5\_67min\_V3.lib

SI:22 Formula:C13H22O3Si2 CAS:99-96-7 MolWeight:282 RetIndex:1636

CompName:4-Hydroxybenzoic acid-2TMS ; 4-hydroxybenzoic acid

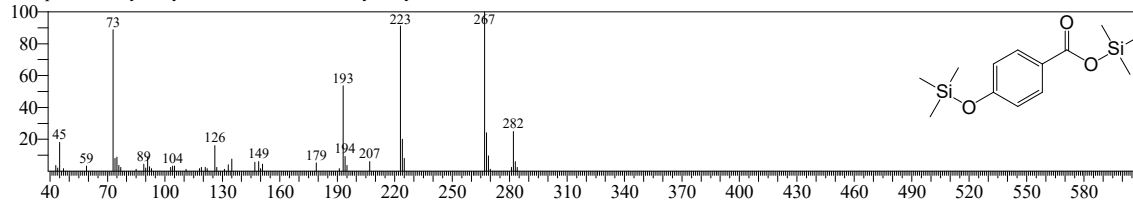



# TNAU

<< Target >>

Line#:31 R.Time:32.000(Scan#:5501) MassPeaks:309

RawMode:Averaged 31.995-32.005(5500-5502) BasePeak:281.05(1093)

BG Mode:Calc. from Peak Group 1 - Event 1 Q3 Scan

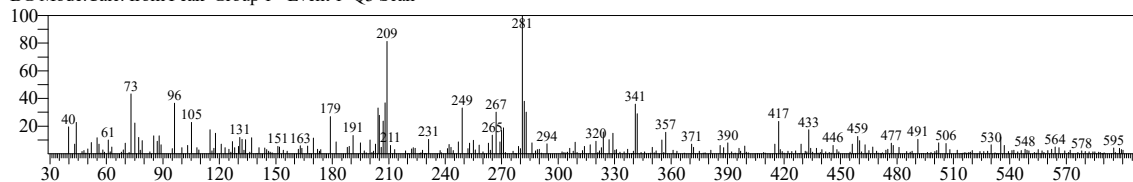

Hit#:1 Entry:341 Library:OA\_TMS\_DB5\_67min\_V3.lib

SI:34 Formula:C18H34O4Si3 CAS:3247-75-4 MolWeight:398 RetIndex:1864

CompName:3-(3-Hydroxyphenyl)-3-hydroxypropionic acid-3TMS ; 3-hydroxy-3-(3-hydroxyphenyl)propanoic acid

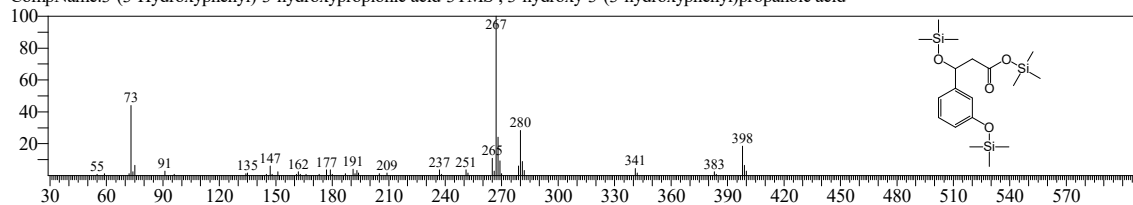

Hit#:2 Entry:343 Library:OA\_TMS\_DB5\_67min\_V3.lib

SI:33 Formula:C18H37NO3Si3 CAS:51-43-4 MolWeight:399 RetIndex:1868

CompName:Epinephrine-3TMS ; 4-[(1R)-1-hydroxy-2-(methylamino)ethyl]benzene-1,2-diol

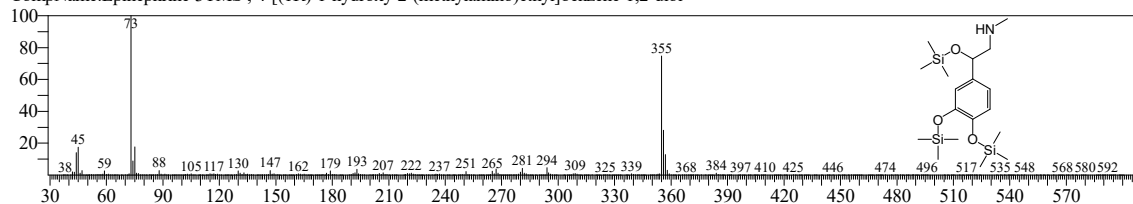

Hit#:3 Entry:402 Library:OA\_TMS\_DB5\_67min\_V3.lib

SI:29 Formula:C20H42O4Si4 CAS:775-01-9 MolWeight:458 RetIndex:1942

CompName:3,4-Dihydroxymandelic acid-4TMS ; 2-(3,4-dihydroxyphenyl)-2-hydroxyacetic acid

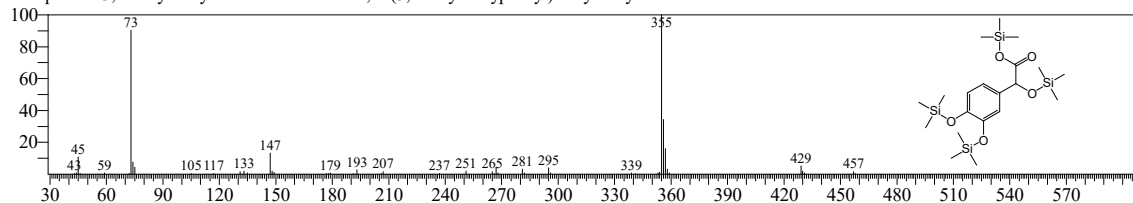

Hit#:4 Entry:211 Library:OA\_TMS\_DB5\_67min\_V3.lib

SI:29 Formula:C13H22O3Si2 CAS:99-96-7 MolWeight:282 RetIndex:1636

CompName:4-Hydroxybenzoic acid-2TMS ; 4-hydroxybenzoic acid



Hit#:5 Entry:200 Library:OA\_TMS\_DB5\_67min\_V3.lib

SI:29 Formula:C14H24O3Si2 CAS:621-37-4 MolWeight:296 RetIndex:1617

CompName:3-Hydroxyphenylacetic acid-2TMS ; 2-(3-hydroxyphenyl)acetic acid

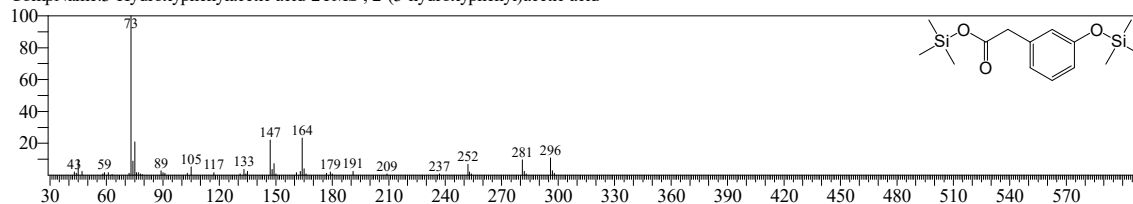

# TNAU

<< Target >>

Line#:32 R.Time:32.300(Scan#:5561) MassPeaks:270

RawMode:Averaged 32.295-32.305(5560-5562) BasePeak:282.00(797)

BG Mode:Calc. from Peak Group 1 - Event 1 Q3 Scan

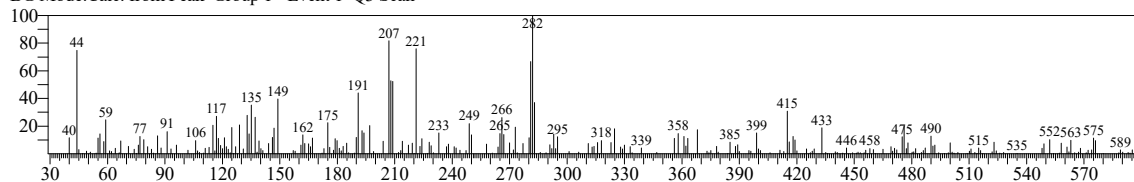

Hit#:1 Entry:203 Library:OA\_TMS\_DB5\_67min\_V3.lib

SI:33 Formula:C13H23NO2Si2 CAS:118-92-3 MolWeight:281 RetIndex:1623

CompName:Anthranilic acid-2TMS ; 2-aminobenzoic acid

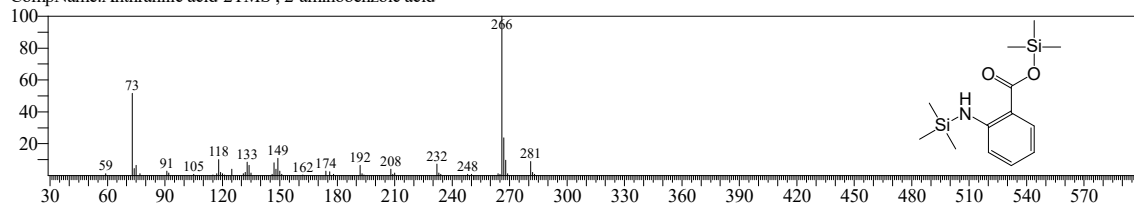

Hit#:2 Entry:211 Library:OA\_TMS\_DB5\_67min\_V3.lib

SI:29 Formula:C13H22O3Si2 CAS:99-96-7 MolWeight:282 RetIndex:1636

CompName:4-Hydroxybenzoic acid-2TMS ; 4-hydroxybenzoic acid

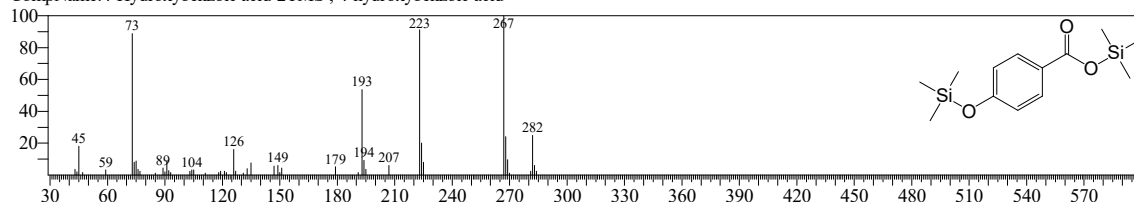

Hit#:3 Entry:179 Library:OA\_TMS\_DB5\_67min\_V3.lib

SI:28 Formula:C13H22O3Si2 CAS:99-06-9 MolWeight:282 RetIndex:1572

CompName:3-Hydroxybenzoic acid-2TMS ; 3-hydroxybenzoic acid

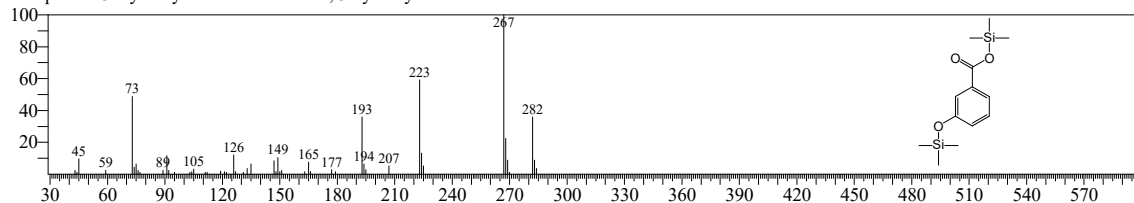

Hit#:4 Entry:310 Library:OA\_TMS\_DB5\_67min\_V3.lib

SI:27 Formula:C11H20N4OSi2 CAS:68-94-0 MolWeight:280 RetIndex:1822

CompName:Hypoxanthine-2TMS ; 3,7-dihydropurin-6-one

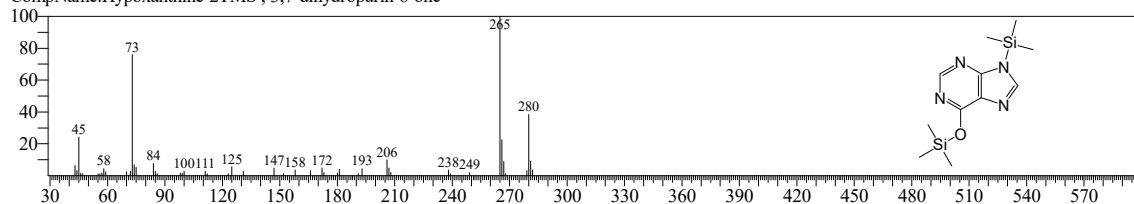

Hit#:5 Entry:315 Library:OA\_TMS\_DB5\_67min\_V3.lib

SI:25 Formula:C16H30O4Si3 CAS:99-50-3 MolWeight:370 RetIndex:1833

CompName:Protocatechuic acid-3TMS ; 3,4-dihydroxybenzoic acid

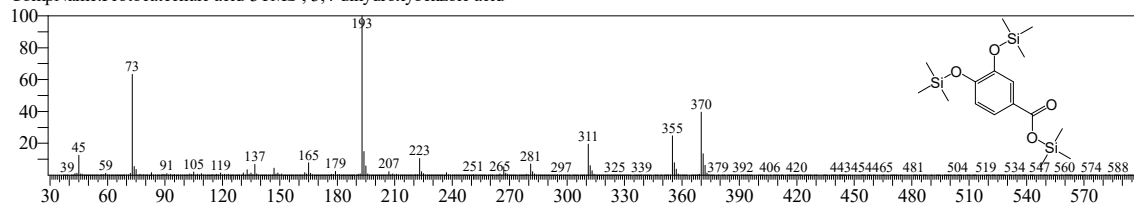

<< Target >>

Line#:33 R.Time:32.350(Scan#:5571) MassPeaks:287

RawMode:Averaged 32.345-32.355(5570-5572) BasePeak:209.05(974)

BG Mode:Calc. from Peak Group 1 - Event 1 Q3 Scan

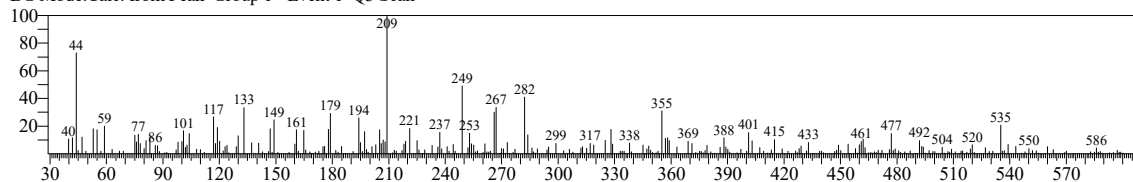

Hit#:1 Entry:179 Library:OA\_TMS\_DB5\_67min\_V3.lib

SI:29 Formula:C13H22O3Si2 CAS:99-06-9 MolWeight:282 RetIndex:1572

CompName:3-Hydroxybenzoic acid-2TMS ; 3-hydroxybenzoic acid



Hit#:2 Entry:203 Library:OA\_TMS\_DB5\_67min\_V3.lib

SI:29 Formula:C13H23NO2Si2 CAS:118-92-3 MolWeight:281 RetIndex:1623

CompName:Anthranilic acid-2TMS ; 2-aminobenzoic acid

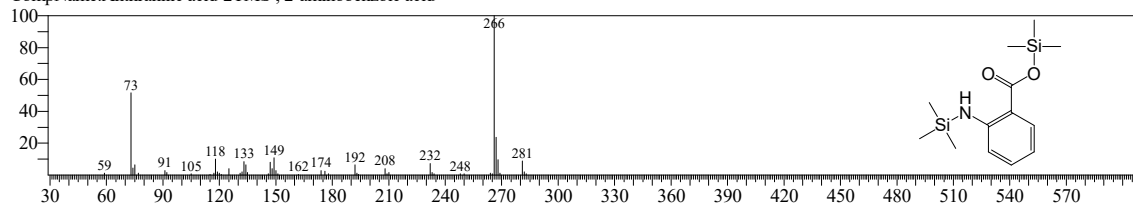

Hit#:3 Entry:402 Library:OA\_TMS\_DB5\_67min\_V3.lib

SI:28 Formula:C20H42O4Si4 CAS:775-01-9 MolWeight:458 RetIndex:1942

CompName:3,4-Dihydroxymandelic acid-4TMS ; 2-(3,4-dihydroxyphenyl)-2-hydroxyacetic acid



Hit#:4 Entry:211 Library:OA\_TMS\_DB5\_67min\_V3.lib

SI:26 Formula:C13H22O3Si2 CAS:99-96-7 MolWeight:282 RetIndex:1636

CompName:4-Hydroxybenzoic acid-2TMS ; 4-hydroxybenzoic acid



Hit#:5 Entry:539 Library:OA\_TMS\_DB5\_67min\_V3.lib

SI:26 Formula:C27H60O3Si2 CAS:544-62-7 MolWeight:488 RetIndex:2684

CompName:Batyl alcohol-2TMS ; 3-octadecoxypropane-1,2-diol

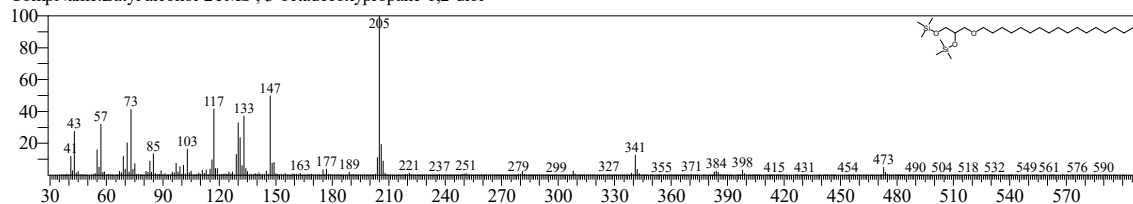

# TNAU

<< Target >>

Line#:34 R.Time:32.470(Scan#:5595) MassPeaks:293

RawMode:Averaged 32.465-32.475(5594-5596) BasePeak:207.05(1940)

BG Mode:Calc. from Peak Group 1 - Event 1 Q3 Scan

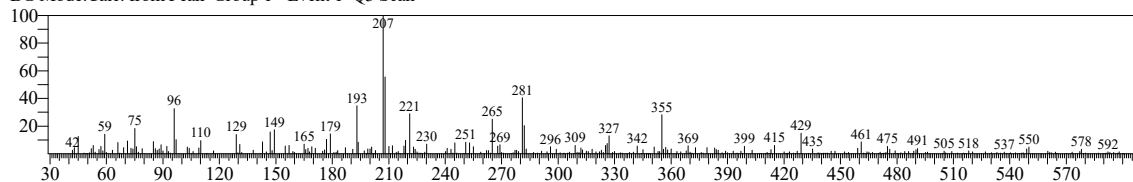

Hit#:1 Entry:315 Library:OA\_TMS\_DB5\_67min\_V3.lib

SI:33 Formula:C16H30O4Si3 CAS:99-50-3 MolWeight:370 RetIndex:1833

CompName:Protocatechuic acid-3TMS ; 3,4-dihydroxybenzoic acid

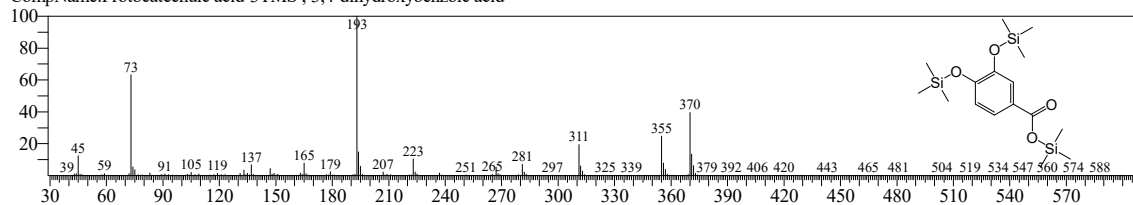

Hit#:2 Entry:402 Library:OA\_TMS\_DB5\_67min\_V3.lib

SI:33 Formula:C20H42O4Si4 CAS:775-01-9 MolWeight:458 RetIndex:1942

CompName:3,4-Dihydroxymandelic acid-4TMS ; 2-(3,4-dihydroxyphenyl)-2-hydroxyacetic acid

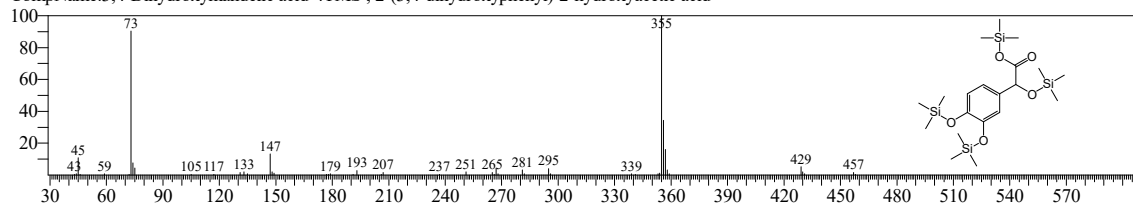

Hit#:3 Entry:382 Library:OA\_TMS\_DB5\_67min\_V3.lib

SI:32 Formula:C18H34O4Si3 CAS:6482-98-0 MolWeight:398 RetIndex:1918

CompName:4-Hydroxyphenyllactic acid-3TMS ; 2-hydroxy-3-(4-hydroxyphenyl)propanoate

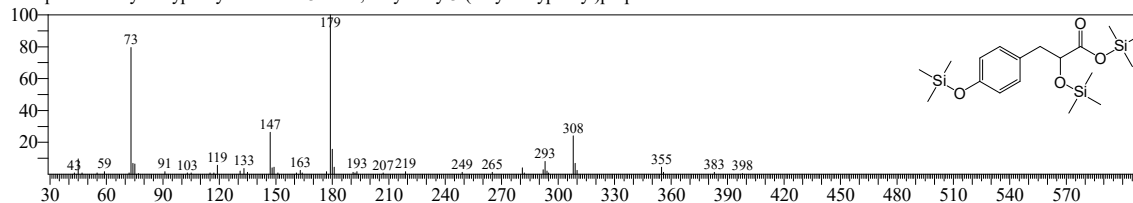

Hit#:4 Entry:413 Library:OA\_TMS\_DB5\_67min\_V3.lib

SI:32 Formula:C18H35NO3Si3 CAS:60-18-4 MolWeight:397 RetIndex:1958

CompName:Tyrosine-3TMS ; (2S)-2-amino-3-(4-hydroxyphenyl)propanoic acid

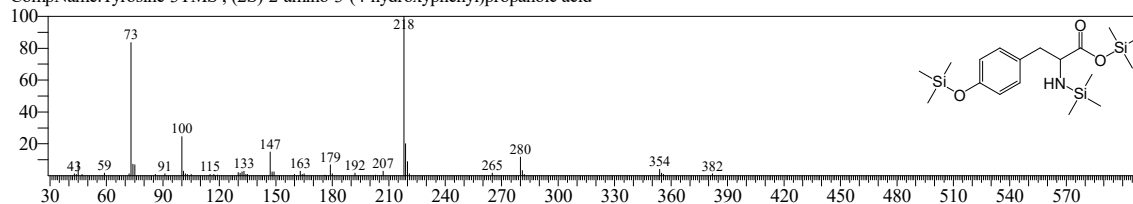

Hit#:5 Entry:310 Library:OA\_TMS\_DB5\_67min\_V3.lib

SI:31 Formula:C11H20N4OSi2 CAS:68-94-0 MolWeight:280 RetIndex:1822

CompName:Hypoxanthine-2TMS ; 3,7-dihydropurin-6-one

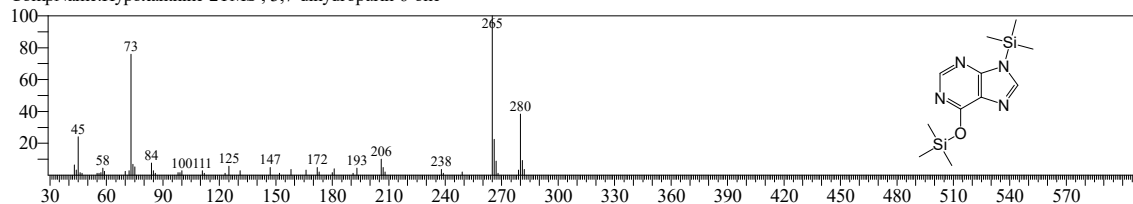

# TNAU

<< Target >>

Line#:35 R.Time:32.505(Scan#:5602) MassPeaks:315

RawMode:Averaged 32.500-32.510(5601-5603) BasePeak:207.05(1997)

BG Mode:Calc. from Peak Group 1 - Event 1 Q3 Scan

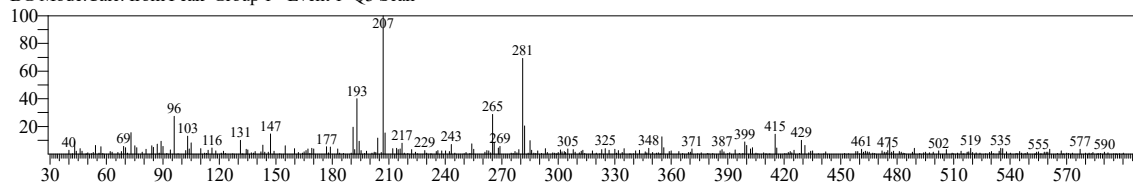

Hit#:1 Entry:402 Library:OA TMS DB5 67min V3.lib

SI:42 Formula:C20H42O4Si4 CAS:775-01-9 MolWeight:458 RetIndex:1942

CompName:3,4-Dihydroxymandelic acid-4TMS ; 2-(3,4-dihydroxyphenyl)-2-hydroxyacetic acid

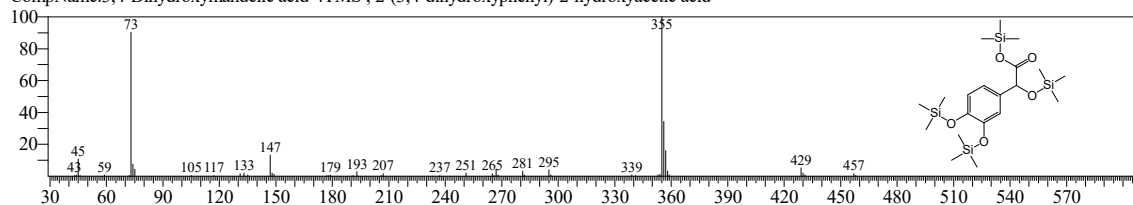

Hit#:2 Entry:310 Library:OA TMS DB5 67min V3.lib

SI:41 Formula:C11H20N4OSi2 CAS:68-94-0 MolWeight:280 RetIndex:1822

CompName:Hypoxanthine-2TMS ; 3,7-dihydropurin-6-one

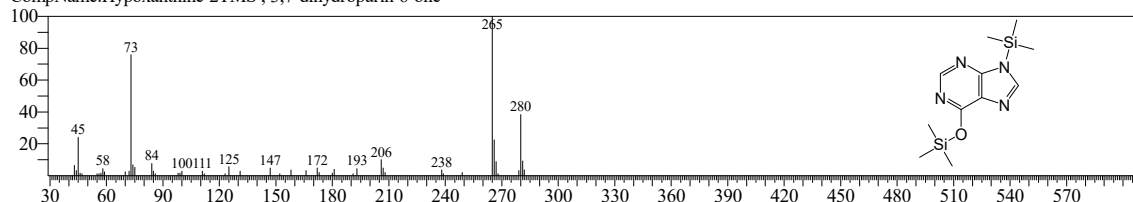

Hit#:3 Entry:295 Library:OA TMS DB5 67min V3.lib

SI:39 Formula:C17H42O5Si4 CAS:58-86-6 MolWeight:438 RetIndex:1784

CompName:Xylose-4TMS(2) ; (2R,3S,4R)-2,3,4,5-tetrahydroxypentanal

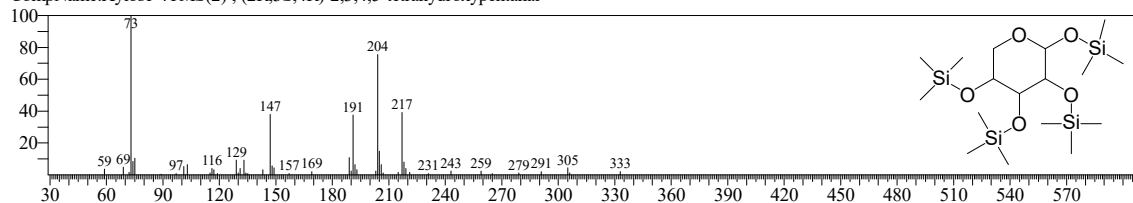

Hit#:4 Entry:238 Library:OA TMS DB5 67min V3.lib

SI:39 Formula:C17H42O5Si4 CAS:1114-34-7 MolWeight:438 RetIndex:1675

CompName:Lyxose-4TMS(2) ; (2S,3S,4R)-2,3,4,5-tetrahydroxypentanal

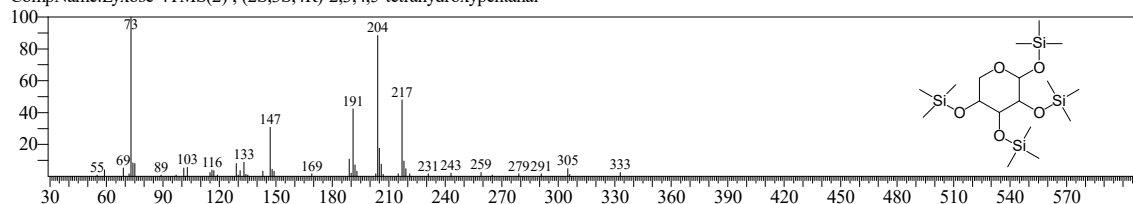

Hit#:5 Entry:343 Library:OA TMS DB5 67min V3.lib

SI:38 Formula:C18H37NO3Si3 CAS:51-43-4 MolWeight:399 RetIndex:1868

CompName:Epinephrine-3TMS ; 4-[(1R)-1-hydroxy-2-(methylamino)ethyl]benzene-1,2-diol

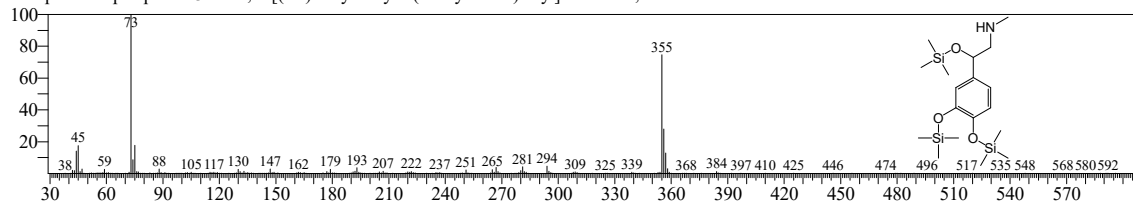

Supplement: Supplementary file 40 [file supplementary]
