# Supplementary material for: Comparative Metabolomics Profiling Reveals Key Metabolites and Associated Pathways Regulating Tuber Dormancy in White Yam (<em>Dioscorea rotundata</em>)
Source: Preprints.org preprint supplement (doi:10.20944/preprints202303.0378.v1), 2023-03-21

# TNAU

## Sample Information

Analyzed by : Admin  
 Analyzed : 04-Aug-22 5:33:26 PM  
 Sample Type : Unknown  
 Level # : 1  
 Sample Name : C42-1  
 Sample ID : C42-1  
 IS Amount : [1]=1  
 Sample Amount : 1  
 Dilution Factor : 1  
 Vial # : 2  
 Injection Volume : 1.00  
 Data File : D:\GCMS-8040NX\Aug 2022\Users\04.08.2022\Data files\04082022-002.qgd  
 Org Data File : D:\GCMS-8040NX\Aug 2022\Users\04.08.2022\Data files\04082022-002.qgd  
 Method File : D:\GCMS-8040NX\Aug 2022\Users\04.08.2022\Method file\27072022\_methodfile.qgm  
 Org Method File : D:\GCMS-8040NX\Aug 2022\Users\04.08.2022\Method file\27072022\_methodfile.qgm  
 Report File :  
 Tuning File : D:\GCMS-8040NX\Aug 2022\Tuning Data\TUNING 04082022.qgt  
 [Comment]  
 Jerry samples  
 Modified by : Admin  
 Modified : 05-Aug-22 4:09:07 PM

Chromatogram C42-1 D:\GCMS-8040NX\Aug 2022\Users\04.08.2022\Data files\04082022-002.qgd

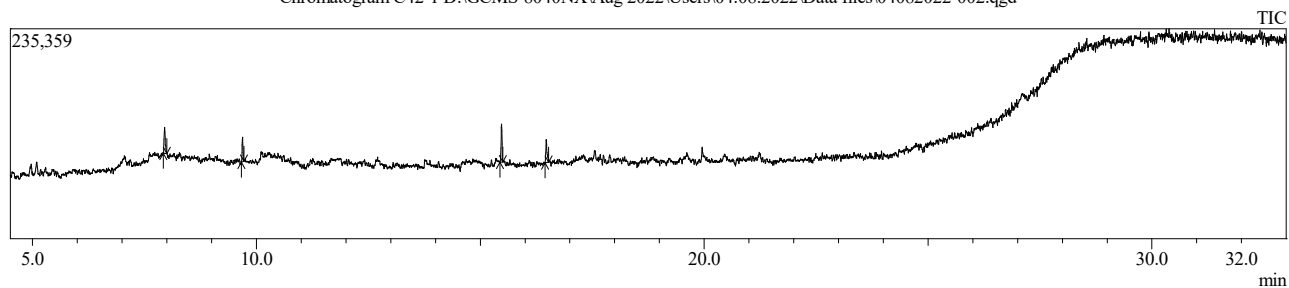

Peak Report TIC

| Peak# | R.Time | Area   | Area%  | Height | Height% | A/H  | Similarity | Name                                          |
|-------|--------|--------|--------|--------|---------|------|------------|-----------------------------------------------|
| 1     | 7.948  | 53276  | 26.43  | 29172  | 23.35   | 1.83 | 88         | Decane                                        |
| 2     | 9.689  | 40081  | 19.89  | 27481  | 21.99   | 1.46 | 89         | Dodecane                                      |
| 3     | 15.474 | 58644  | 29.10  | 42447  | 33.97   | 1.38 | 89         | 2,4-Di-tert-butylphenol                       |
| 4     | 16.473 | 49554  | 24.59  | 25860  | 20.69   | 1.92 | 88         | 2,2,4-Trimethyl-1,3-pentanediol diisobutyrate |
|       |        | 201555 | 100.00 | 124960 | 100.00  |      |            |                                               |

Library

# TNAU

<< Target >>

Line#:1 R.Time:7.950(Scan#:691) MassPeaks:293  
RawMode:Averaged 7.945-7.955(690-692) BasePeak:57.10(7441)  
BG Mode:Calc. from Peak Group 1 - Event 1 Q3 Scan

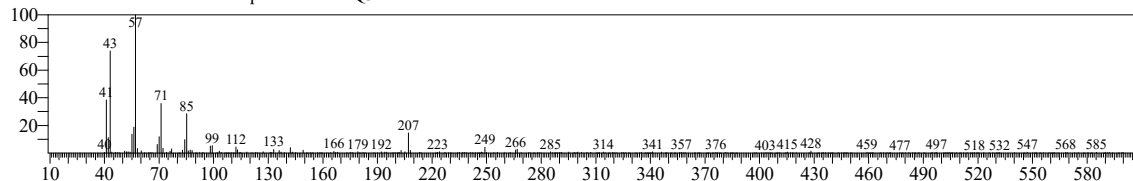

Hit#:1 Entry:9445 Library:NIST20R.lib  
SI:88 Formula:C10H22 CAS:124-18-5 MolWeight:142 RetIndex:1000  
CompName:Decane \$\$ n-Decane \$\$ n-C10H22 \$\$ UN 2247

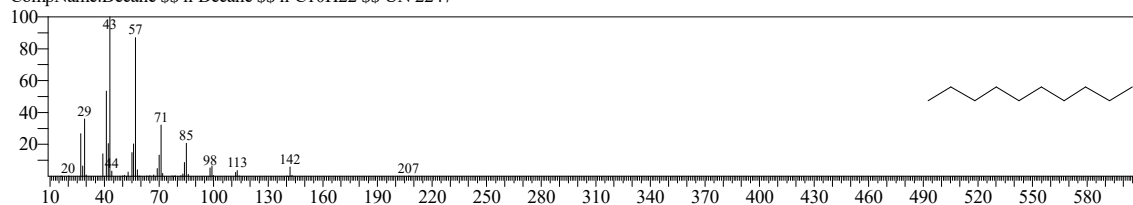

Hit#:2 Entry:30057 Library:NIST20M1.lib  
SI:88 Formula:C12H26 CAS:112-40-3 MolWeight:170 RetIndex:1200  
CompName:Dodecane \$\$ n-Dodecane \$\$ Adakane 12 \$\$ Ba 51-090453 \$\$ CH3(CH2)10CH3 \$\$ Bihexyl \$\$ Dihexyl \$\$ Duodecane \$\$ NSC 8714

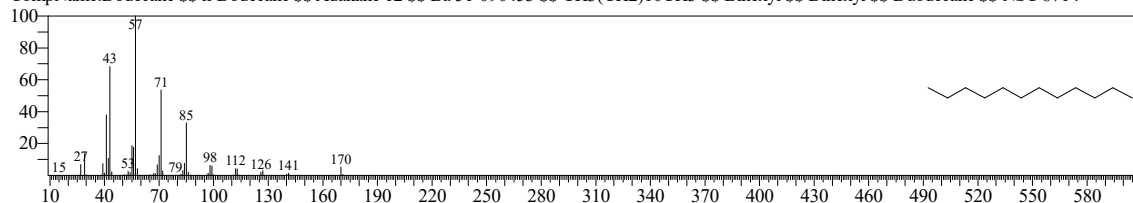

Hit#:3 Entry:12897 Library:NIST20R.lib  
SI:88 Formula:C11H24 CAS:1120-21-4 MolWeight:156 RetIndex:1100  
CompName:Undecane \$\$ n-Undecane \$\$ Hendecane \$\$ n-C11H24 \$\$ UN 2330

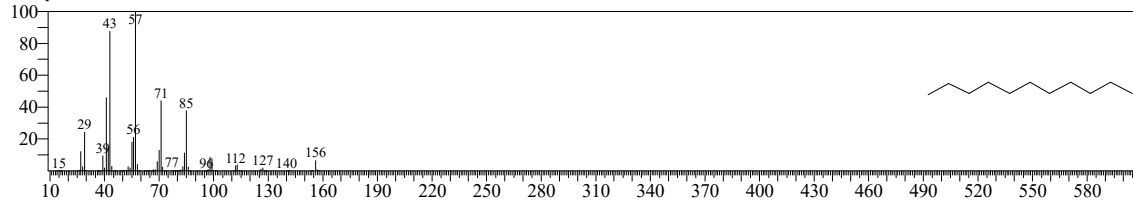

Hit#:4 Entry:40226 Library:NIST20M1.lib  
SI:87 Formula:C13H28 CAS:629-50-5 MolWeight:184 RetIndex:1300  
CompName:Tridecane \$\$ n-Tridecane \$\$ Tridecane, n-

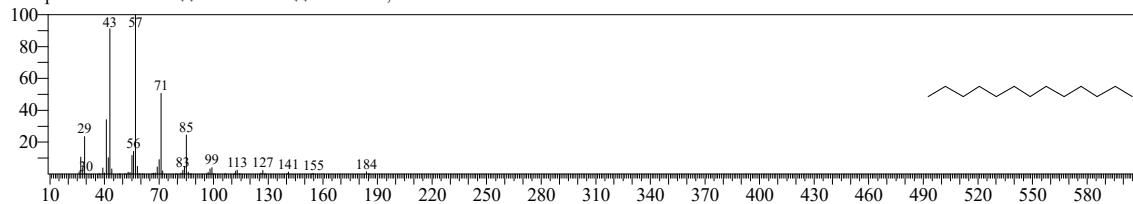

Hit#:5 Entry:25291 Library:NIST20R.lib  
SI:86 Formula:C15H32 CAS:31295-56-4 MolWeight:212 RetIndex:1320  
CompName:Dodecane, 2,6,11-trimethyl- \$\$ 2,6,11-Trimethyldodecane

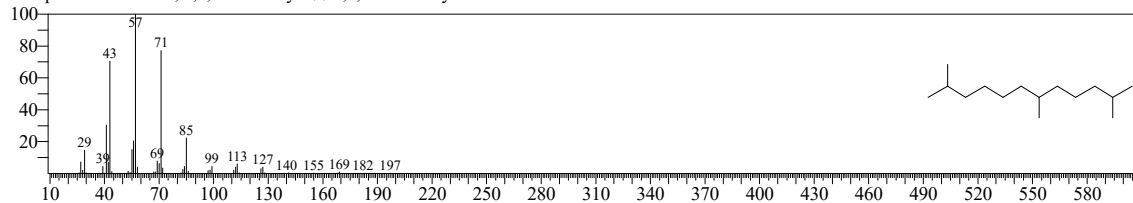

# TNAU

<< Target >>

Line# 2 R.Time: 9.690 (Scan#: 1039) MassPeaks: 275

RawMode: Averaged 9.685-9.695 (1038-1040) BasePeak: 57.10 (6350)

BG Mode: Calc. from Peak Group 1 - Event 1 Q3 Scan

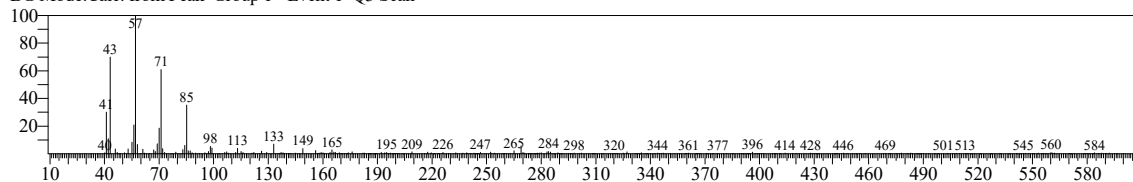

Hit#: 1 Entry: 30057 Library: NIST20M1.lib

SI: 89 Formula: C<sub>12</sub>H<sub>26</sub> CAS: 112-40-3 MolWeight: 170 RetIndex: 1200

CompName: Dodecane \$ n-Dodecane \$ Adakane 12 \$ Ba 51-090453 \$ CH<sub>3</sub>(CH<sub>2</sub>)<sub>10</sub>CH<sub>3</sub> \$ Bihexyl \$ Dihexyl \$ Duodecane \$ NSC 8714

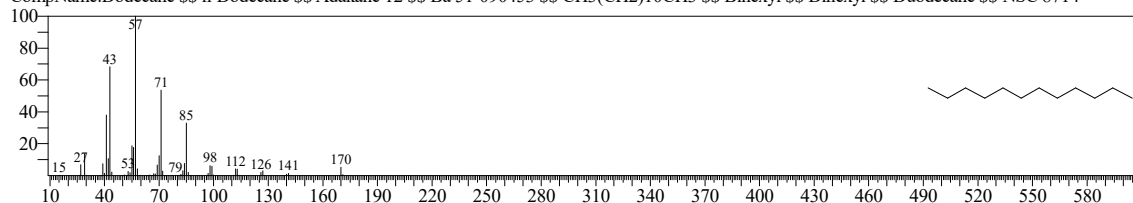

Hit#: 2 Entry: 25291 Library: NIST20R.lib

SI: 88 Formula: C<sub>15</sub>H<sub>32</sub> CAS: 31295-56-4 MolWeight: 212 RetIndex: 1320

CompName: Dodecane, 2,6,11-trimethyl- \$ 2,6,11-Trimethyldodecane

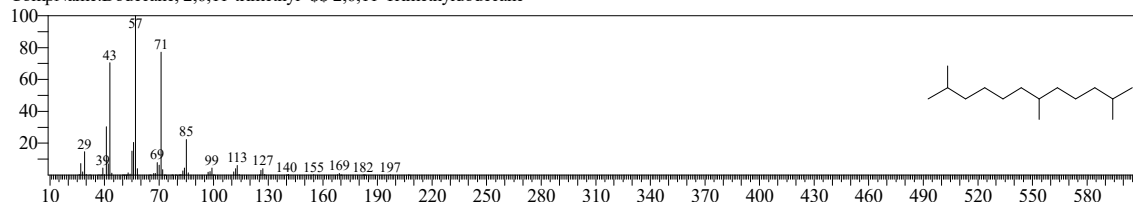

Hit#: 3 Entry: 12898 Library: NIST20R.lib

SI: 88 Formula: C<sub>11</sub>H<sub>24</sub> CAS: 1120-21-4 MolWeight: 156 RetIndex: 1100

CompName: Undecane \$ n-Undecane \$ Hendecane \$ n-C<sub>11</sub>H<sub>24</sub> \$ UN 2330

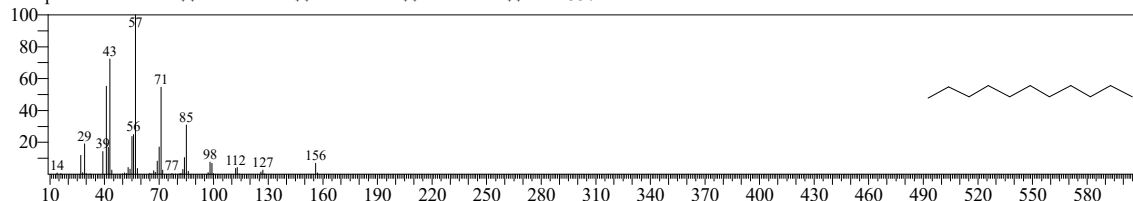

Hit#: 4 Entry: 19412 Library: NIST20R.lib

SI: 88 Formula: C<sub>13</sub>H<sub>28</sub> CAS: 629-50-5 MolWeight: 184 RetIndex: 1300

CompName: Tridecane \$ n-Tridecane \$ Tridecane, n-

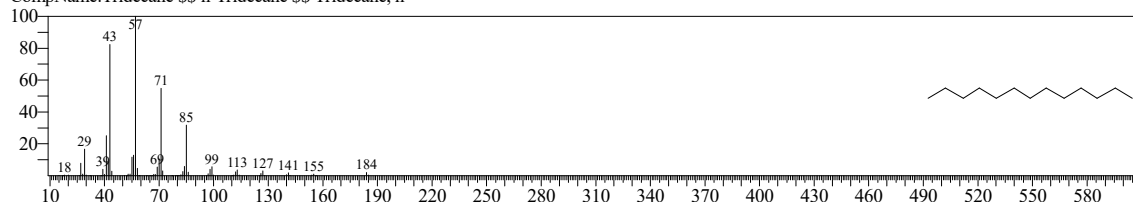

Hit#: 5 Entry: 21047 Library: NIST20M1.lib

SI: 88 Formula: C<sub>11</sub>H<sub>24</sub> CAS: 17302-32-8 MolWeight: 156 RetIndex: 986

CompName: Nonane, 3,7-dimethyl- \$ 3,7-Dimethylnonane

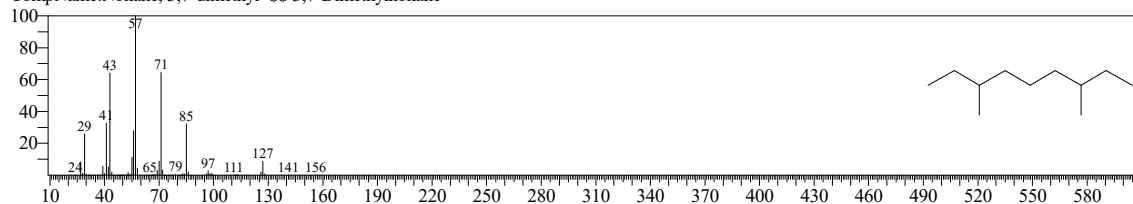

# TNAU

<< Target >>

Line#3 R.Time:15.475(Scan#:2196) MassPeaks:306

RawMode:Averaged 15.470-15.480(2195-2197) BasePeak:191.15(12773)

BG Mode:Calc. from Peak Group 1 - Event 1 Q3 Scan

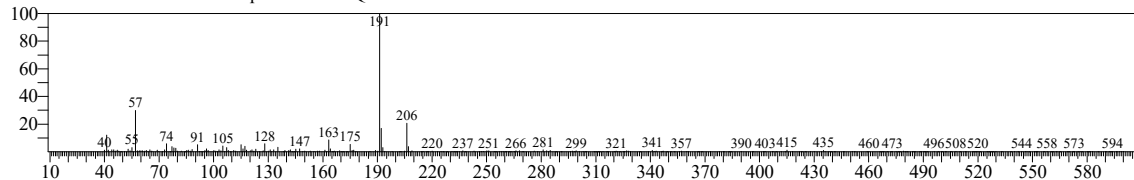

Hit#1 Entry:59048 Library:NIST20M1.lib

SI:89 Formula:C14H22O CAS:96-76-4 MolWeight:206 RetIndex:1555

CompName:2,4-Di-tert-butylphenol \$\$ Phenol, 2,4-bis(1,1-dimethylethyl)- \$\$ Phenol, 2,4-di-tert-butyl- \$\$ 2,4-di-t-Butylphenol \$\$ 1-Hydroxy-2,4-di-tert-bu

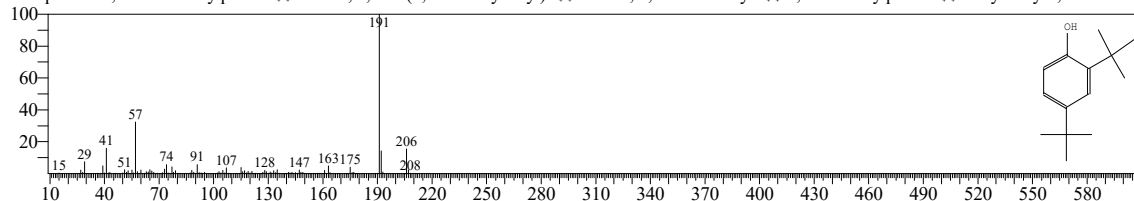

Hit#2 Entry:24110 Library:NIST20R.lib

SI:89 Formula:C14H22O CAS:1138-52-9 MolWeight:206 RetIndex:1555

CompName:Phenol, 3,5-bis(1,1-dimethylethyl)- \$\$ Phenol, 3,5-di-tert-butyl- \$\$ 3,5-Di-tert-butylphenol \$\$ Phenol, 3,5-bis(t-butyl) \$\$ 3,5-Di-t-butylphenol \$

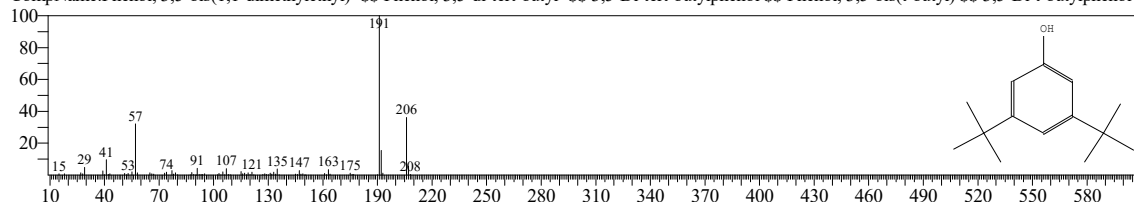

Hit#3 Entry:24081 Library:NIST20R.lib

SI:88 Formula:C14H22O CAS:128-39-2 MolWeight:206 RetIndex:1555

CompName:Phenol, 2,6-bis(1,1-dimethylethyl)- \$\$ Phenol, 2,6-di-tert-butyl- \$\$ 2,6-Bis(tert-butyl)phenol \$\$ 2,6-Bis(1,1-dimethylethyl)phenol \$\$ 2,6-Di-tert

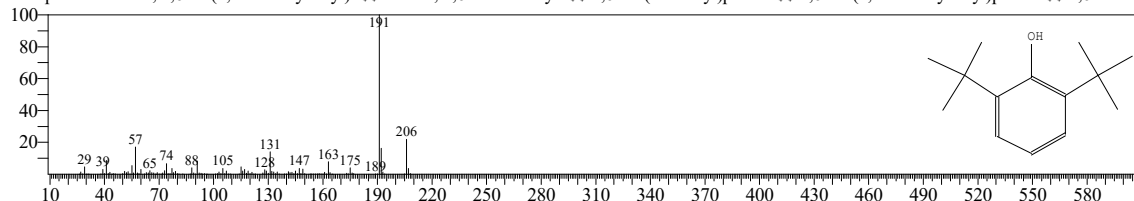

Hit#4 Entry:24098 Library:NIST20R.lib

SI:87 Formula:C14H22O CAS:5875-45-6 MolWeight:206 RetIndex:1555

CompName:Phenol, 2,5-bis(1,1-dimethylethyl)- \$\$ Phenol, 2,5-di-tert-butyl- \$\$ 2,5-Di-tert-butylphenol \$\$ 2,5-bis(1,1-Dimethylethyl)phenol

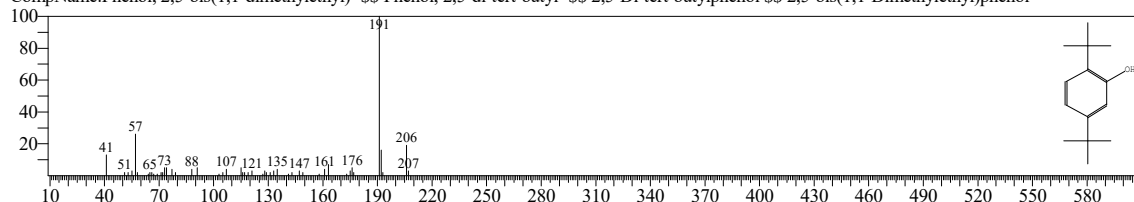

Hit#5 Entry:103047 Library:NIST20M1.lib

SI:84 Formula:C16H24O2 CAS:104316-22-5 MolWeight:248 RetIndex:1714

CompName:2,4-Di-tert-butylphenol, acetate

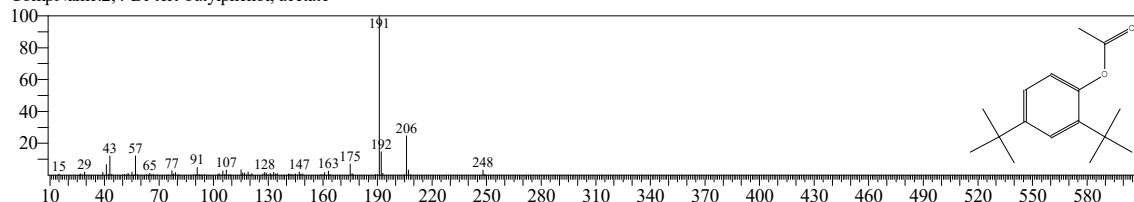

# TNAU

<< Target >>

Line#4 R.Time:16.475(Scan#:2396) MassPeaks:277

RawMode:Averaged 16.470-16.480(2395-2397) BasePeak:71.05(9814)

BG Mode:Calc. from Peak Group 1 - Event 1 Q3 Scan

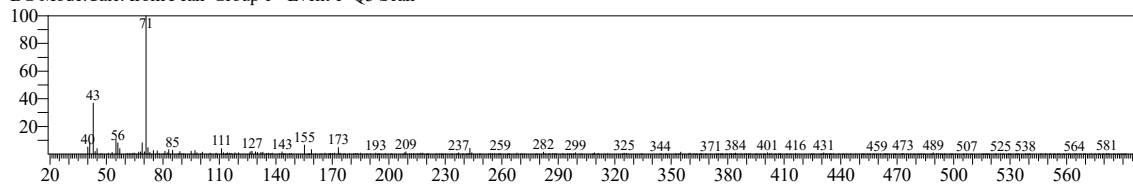

Hit#1 Entry:34622 Library:NIST20R.lib

SI:88 Formula:C16H30O4 CAS:6846-50-0 MolWeight:286 RetIndex:1605

CompName:2,2,4-Trimethyl-1,3-pentanediol diisobutyrate \$\$ Propanoic acid, 2-methyl-, 2,2-dimethyl-1-(1-methylethyl)-1,3-propanediyl ester \$\$ 1,3-Pentan

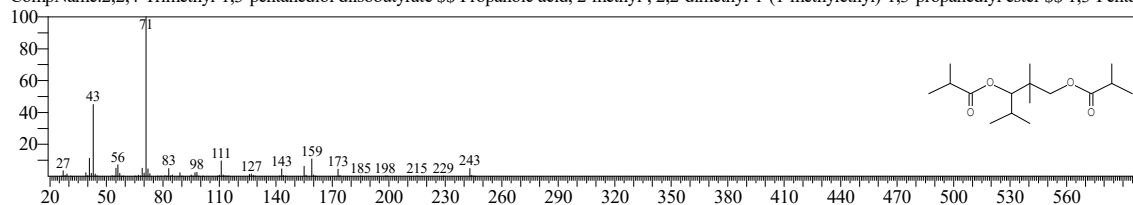

Hit#2 Entry:146809 Library:NIST20M1.lib

SI:85 Formula:C16H30O4 CAS:0-00-0 MolWeight:286 RetIndex:1605

CompName:Pentanoic acid, 2,2,4-trimethyl-3-carboxyisopropyl, isobutyl ester \$\$ 1-Isobutyl 4-isopropyl 3-isopropyl-2,2-dimethylsuccinate #

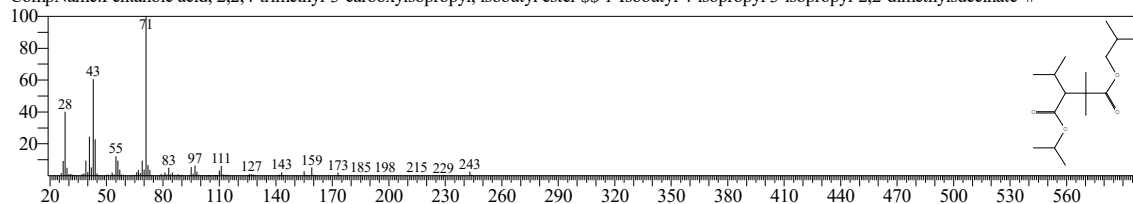

Hit#3 Entry:4513 Library:NIST20M1.lib

SI:81 Formula:C7H14O CAS:4798-60-1 MolWeight:114 RetIndex:823

CompName:4-Hexen-3-ol, 2-methyl- \$\$ 2-Hexen-4-ol, 5-methyl- \$\$ 2-Methyl-4-hexen-3-ol

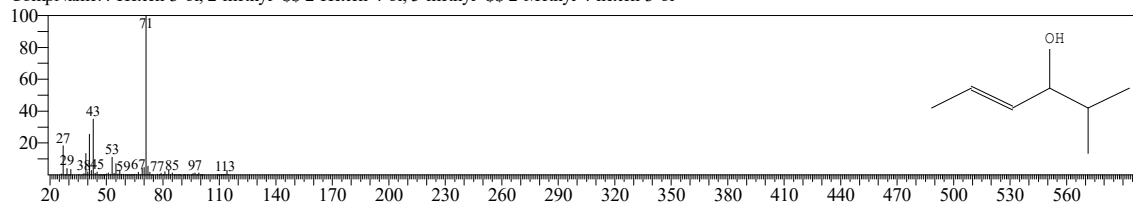

Hit#4 Entry:20598 Library:NIST20M1.lib

SI:81 Formula:C8H12O3 CAS:19680-00-3 MolWeight:156 RetIndex:1316

CompName:Tetrahydro[2,2']bifuranyl-5-one

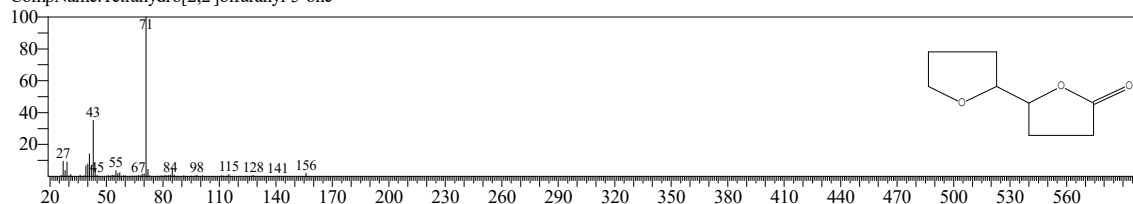

Hit#5 Entry:7107 Library:NIST20M1.lib

SI:80 Formula:C8H14O CAS:34780-69-3 MolWeight:126 RetIndex:888

CompName:3-Methyl-hepta-1,6-dien-3-ol \$\$ 3-Methyl-1,6-heptadien-3-ol #

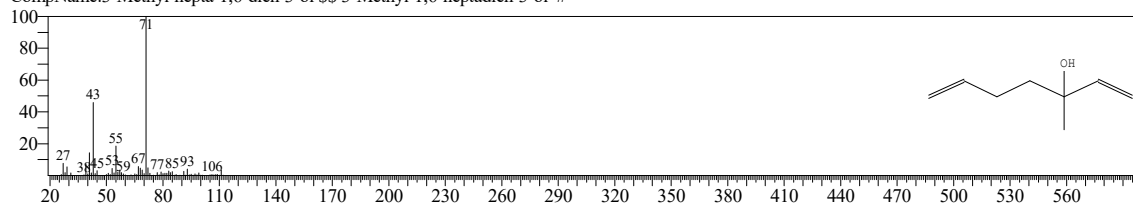

Supplement: Supplementary file 11 [file supplementary]
