# Supplementary material for: Comparative Metabolomics Profiling Reveals Key Metabolites and Associated Pathways Regulating Tuber Dormancy in White Yam (<em>Dioscorea rotundata</em>)
Source: Preprints.org preprint supplement (doi:10.20944/preprints202303.0378.v1), 2023-03-21

# TNAU

## Sample Information

Analyzed by : Admin  
 Analyzed : 04-Aug-22 10:45:43 PM  
 Sample Type : Unknown  
 Level # : 1  
 Sample Name : C87-3  
 Sample ID : C87-3  
 IS Amount : [1]=1  
 Sample Amount : 1  
 Dilution Factor : 1  
 Vial # : 10  
 Injection Volume : 1.00  
 Data File : D:\GCMS-8040NX\Aug 2022\Users\04.08.2022\Data files\04082022-010.qgd  
 Org Data File : D:\GCMS-8040NX\Aug 2022\Users\04.08.2022\Data files\04082022-010.qgd  
 Method File : D:\GCMS-8040NX\Aug 2022\Users\04.08.2022\Method file\27072022\_methodfile.qgm  
 Org Method File : D:\GCMS-8040NX\Aug 2022\Users\04.08.2022\Method file\27072022\_methodfile.qgm  
 Report File :  
 Tuning File : D:\GCMS-8040NX\Aug 2022\Tuning Data\TUNING 04082022.qgt  
 [Comment]  
 Jerry samples  
 Modified by : Admin  
 Modified : 05-Aug-22 4:26:40 PM

Chromatogram C87-3 D:\GCMS-8040NX\Aug 2022\Users\04.08.2022\Data files\04082022-010.qgd

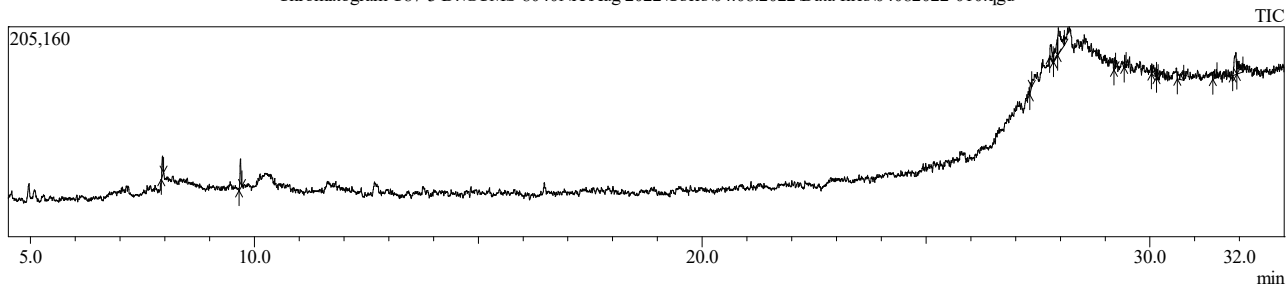

Peak Report TIC

| Peak# | R.Time | Area   | Area%  | Height | Height% | A/H  | Similarity | Name                                        |
|-------|--------|--------|--------|--------|---------|------|------------|---------------------------------------------|
| 1     | 7.944  | 25607  | 4.53   | 19721  | 10.00   | 1.30 | 87         | Undecane                                    |
| 2     | 9.688  | 46199  | 8.18   | 28517  | 14.47   | 1.62 | 88         | Undecane                                    |
| 3     | 27.330 | 13578  | 2.40   | 8064   | 4.09    | 1.68 | 45         | Trehalose-8TMS                              |
| 4     | 27.792 | 40025  | 7.08   | 14159  | 7.18    | 2.83 | 48         | Sucrose-8TMS                                |
| 5     | 27.855 | 60563  | 10.72  | 8678   | 4.40    | 6.98 | 35         | Tagatose-5TMS(4)                            |
| 6     | 27.956 | 113346 | 20.06  | 25844  | 13.11   | 4.39 | 38         | Sucrose-8TMS                                |
| 7     | 29.216 | 13720  | 2.43   | 11210  | 5.69    | 1.22 | 35         | Arabinose-4TMS(2)                           |
| 8     | 29.439 | 11145  | 1.97   | 11556  | 5.86    | 0.96 | 41         | Lyxose-4TMS(2)                              |
| 9     | 30.040 | 40906  | 7.24   | 9851   | 5.00    | 4.15 | 42         | 4-Aminobenzoic acid-2TMS                    |
| 10    | 30.165 | 8348   | 1.48   | 8798   | 4.46    | 0.95 | 38         | Fucose-4TMS(1)                              |
| 11    | 30.738 | 42131  | 7.46   | 8977   | 4.55    | 4.69 | 39         | Epinephrine-3TMS                            |
| 12    | 31.485 | 22536  | 3.99   | 8122   | 4.12    | 2.77 | 30         | 4-Hydroxybenzoic acid-2TMS                  |
| 13    | 31.920 | 71254  | 12.61  | 21739  | 11.03   | 3.28 | 23         | 3-(3-Hydroxyphenyl)-3-hydroxypropionic acid |
| 14    | 31.987 | 55713  | 9.86   | 11880  | 6.03    | 4.69 | 31         | 2-Phenyllactic acid-2TMS                    |
|       |        | 565071 | 100.00 | 197116 | 100.00  |      |            |                                             |

Library

# TNAU

<< Target >>

Line#:1 R.Time:7.945(Scan#:690) MassPeaks:271  
RawMode:Averaged 7.940-7.950(689-691) BasePeak:57.05(5212)  
BG Mode:Calc. from Peak Group 1 - Event 1 Q3 Scan

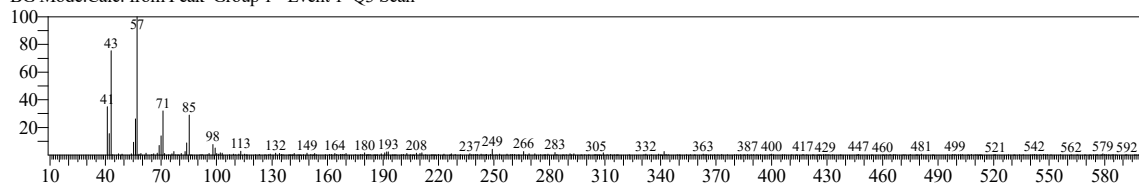

Hit#:1 Entry:12897 Library:NIST20R.lib  
SI:87 Formula:C11H24 CAS:1120-21-4 MolWeight:156 RetIndex:1100  
CompName:Undecane \$\$ n-Undecane \$\$ Hendecane \$\$ n-C11H24 \$\$ UN 2330

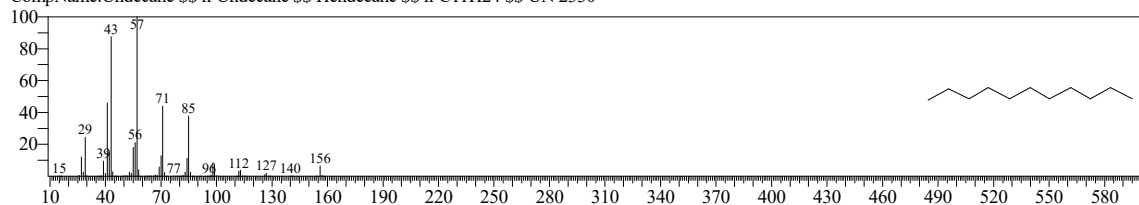

Hit#:2 Entry:9444 Library:NIST20R.lib  
SI:87 Formula:C10H22 CAS:124-18-5 MolWeight:142 RetIndex:1000  
CompName:Decane \$\$ n-Decane \$\$ n-C10H22 \$\$ UN 2247

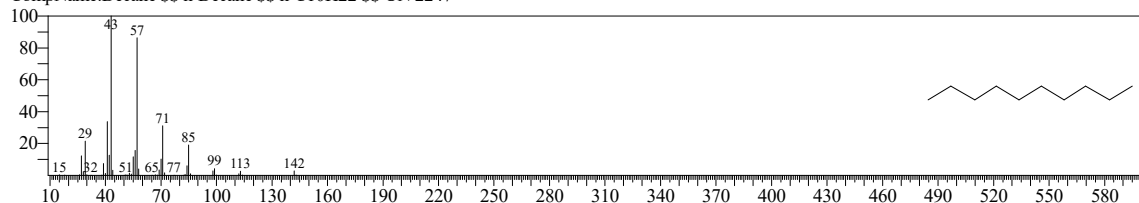

Hit#:3 Entry:30057 Library:NIST20M1.lib  
SI:87 Formula:C12H26 CAS:112-40-3 MolWeight:170 RetIndex:1200  
CompName:Dodecane \$\$ n-Dodecane \$\$ Adakane 12 \$\$ Ba 51-090453 \$\$ CH3(CH2)10CH3 \$\$ Bihexyl \$\$ Dihexyl \$\$ Duodecane \$\$ NSC 8714

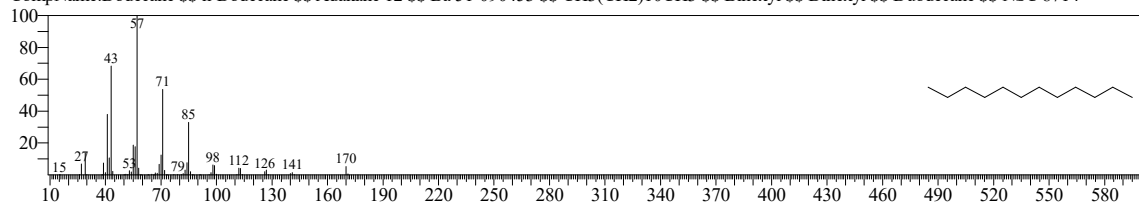

Hit#:4 Entry:40266 Library:NIST20M1.lib  
SI:87 Formula:C13H28 CAS:17615-91-7 MolWeight:184 RetIndex:1185  
CompName:Undecane, 5,6-dimethyl- \$\$ 5,6-Dimethylundecane #

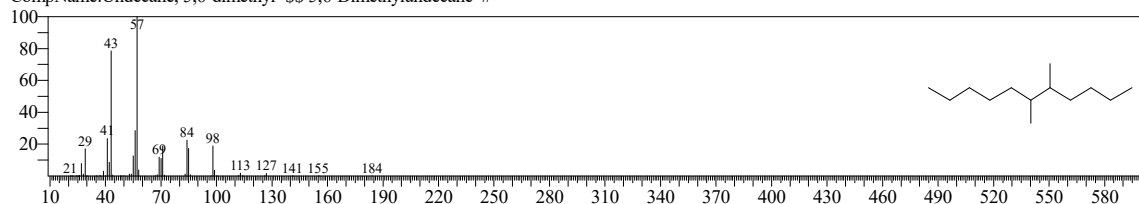

Hit#:5 Entry:40218 Library:NIST20M1.lib  
SI:87 Formula:C13H28 CAS:62108-23-0 MolWeight:184 RetIndex:1121  
CompName:Decane, 2,5,6-trimethyl- \$\$ 2,5,6-Trimethyldecane #

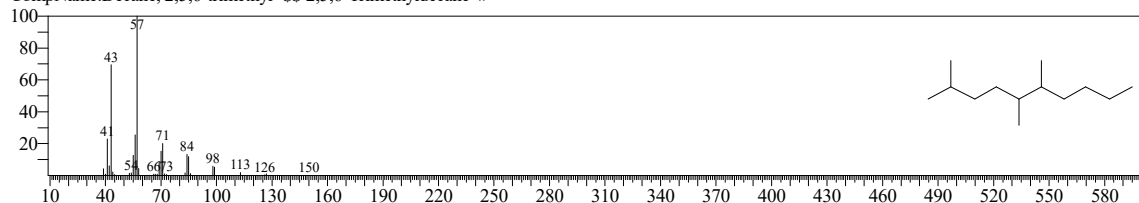

# TNAU

<< Target >>

Line# 2 R.Time: 9.690 (Scan#: 1039) MassPeaks: 340

RawMode: Averaged 9.685-9.695 (1038-1040) BasePeak: 57.05 (5958)

BG Mode: Calc. from Peak Group 1 - Event 1 Q3 Scan

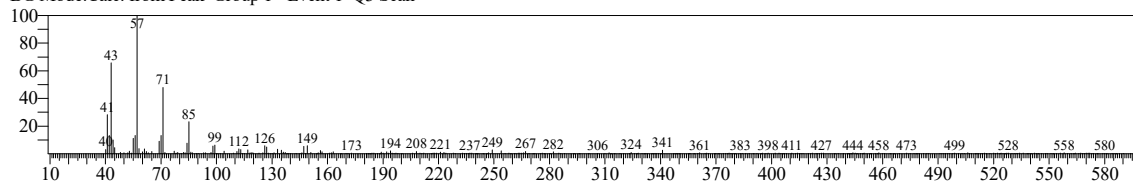

Hit#1 Entry: 21042 Library: NIST20M1.lib

SI: 88 Formula: C<sub>11</sub>H<sub>24</sub> CAS: 1120-21-4 MolWeight: 156 RetIndex: 1100

CompName: Undecane \$\$ n-Undecane \$\$ Hendecane \$\$ n-C<sub>11</sub>H<sub>24</sub> \$\$ UN 2330

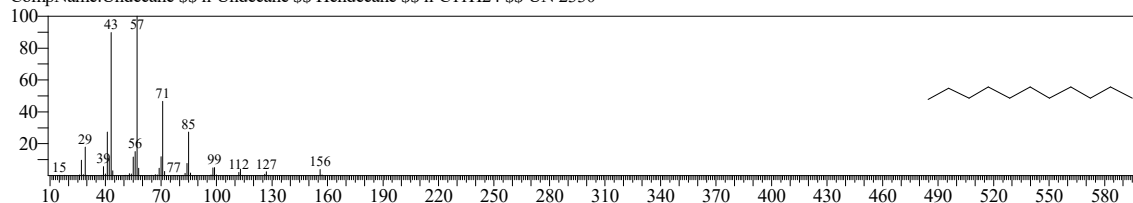

Hit#2 Entry: 30057 Library: NIST20M1.lib

SI: 87 Formula: C<sub>12</sub>H<sub>26</sub> CAS: 112-40-3 MolWeight: 170 RetIndex: 1200

CompName: Dodecane \$\$ n-Dodecane \$\$ Adakane 12 \$\$ Ba 51-090453 \$\$ CH<sub>3</sub>(CH<sub>2</sub>)<sub>10</sub>CH<sub>3</sub> \$\$ Bihexyl \$\$ Dihexyl \$\$ Duodecane \$\$ NSC 8714

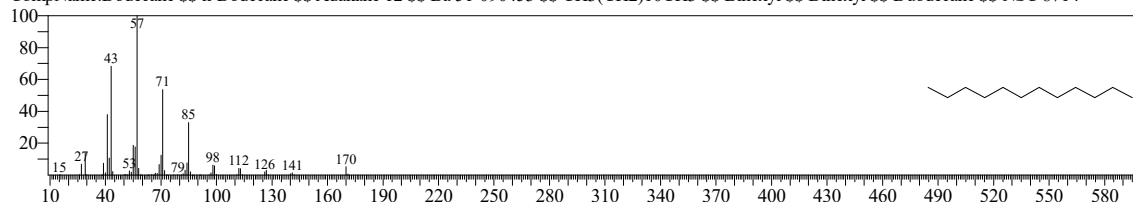

Hit#3 Entry: 40226 Library: NIST20M1.lib

SI: 87 Formula: C<sub>13</sub>H<sub>28</sub> CAS: 629-50-5 MolWeight: 184 RetIndex: 1300

CompName: Tridecane \$\$ n-Tridecane \$\$ Tridecane, n-

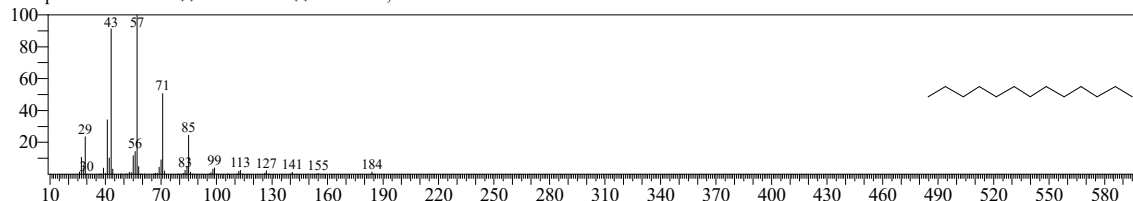

Hit#4 Entry: 13631 Library: NIST20M1.lib

SI: 87 Formula: C<sub>10</sub>H<sub>22</sub> CAS: 15869-93-9 MolWeight: 142 RetIndex: 887

CompName: Octane, 3,5-dimethyl- \$\$ 3,5-Dimethyloctane

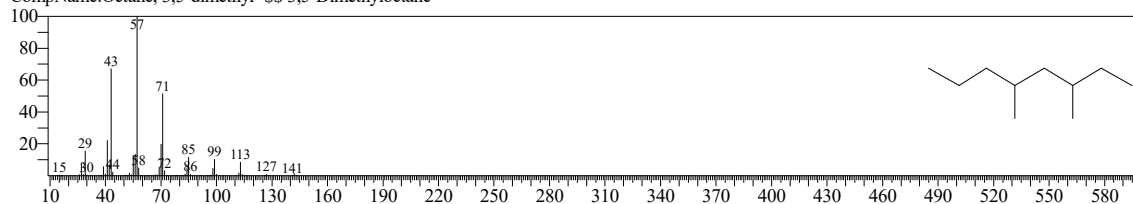

Hit#5 Entry: 27737 Library: NIST20R.lib

SI: 86 Formula: C<sub>16</sub>H<sub>34</sub> CAS: 544-76-3 MolWeight: 226 RetIndex: 1600

CompName: Hexadecane \$\$ n-Cetane \$\$ n-Hexadecane \$\$ Cetane

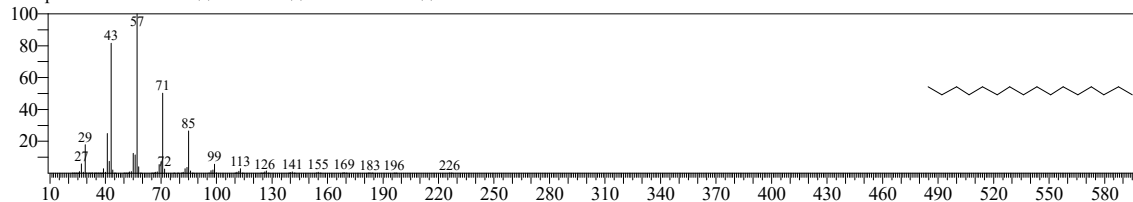

# TNAU

<< Target >>

Line#3 R.Time:27.330(Scan#:4567) MassPeaks:288

RawMode:Averaged 27.325-27.335(4566-4568) BasePeak:361.15(1501)

BG Mode:Calc. from Peak Group 1 - Event 1 Q3 Scan

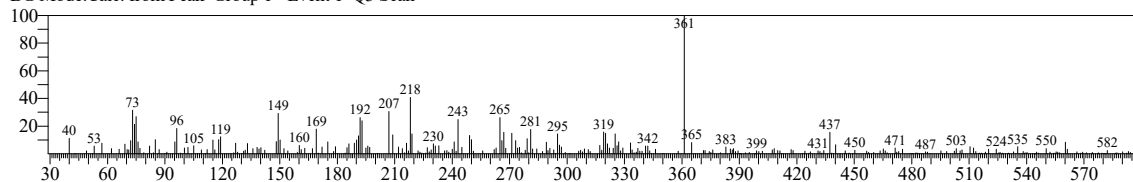

Hit#1 Entry:552 Library:OA\_TMS\_DB5\_67min\_V3.lib

SI:45 Formula:C36H86O11Si8 CAS:99-20-7 MolWeight:918 RetIndex:2812

CompName:Trehalose-8TMS ; (2R,3S,4S,5R,6R)-2-(hydroxymethyl)-6-[(2R,3R,4S,5S,6R)-3,4,5-trihydroxy-6-(hydroxymethyl)oxan-2-yl]oxyoxane-

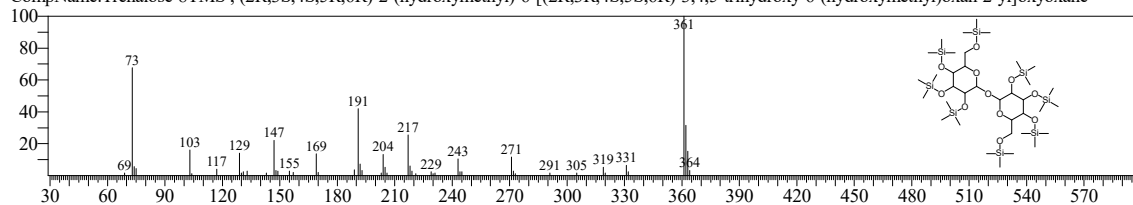

Hit#2 Entry:541 Library:OA\_TMS\_DB5\_67min\_V3.lib

SI:43 Formula:C36H86O11Si8 CAS:57-50-1 MolWeight:918 RetIndex:2705

CompName:Sucrose-8TMS ; (2R,3R,4S,5S,6R)-2-[(2S,3S,4S,5R)-3,4-dihydroxy-2,5-bis(hydroxymethyl)oxolan-2-yl]oxy-6-(hydroxymethyl)oxane-3

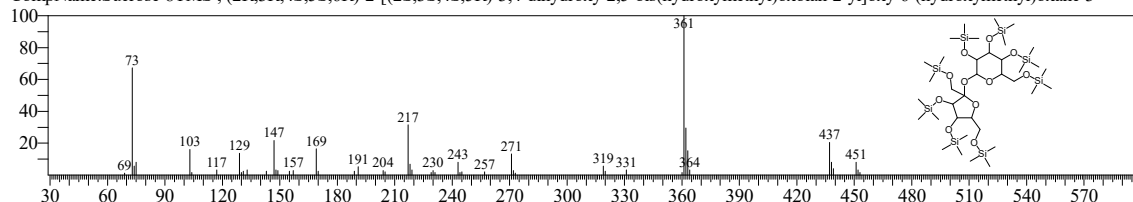

Hit#3 Entry:559 Library:OA\_TMS\_DB5\_67min\_V3.lib

SI:39 Formula:C39H96O11Si9 CAS:585-88-6 MolWeight:992 RetIndex:2923

CompName:Maltitol-9TMS ; (2S,3R,4R,5R)-4-[(2R,3R,4S,5S,6R)-3,4,5-trihydroxy-6-(hydroxymethyl)oxan-2-yl]oxyhexane-1,2,3,5,6-pentol

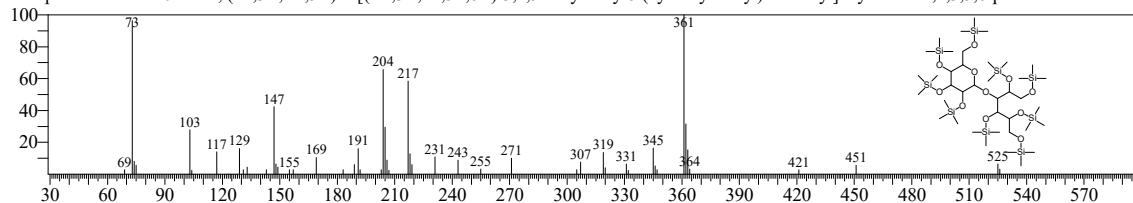

Hit#4 Entry:561 Library:OA\_TMS\_DB5\_67min\_V3.lib

SI:38 Formula:C37H89NO11Si8 CAS:499-40-1 MolWeight:947 RetIndex:2983

CompName:Isomaltose-meto-8TMS(2) ; (3R,4S,5S,6R)-6-[[[(2S,3R,4S,5S,6R)-3,4,5-trihydroxy-6-(hydroxymethyl)oxan-2-yl]oxymethyl]oxane-2,3,

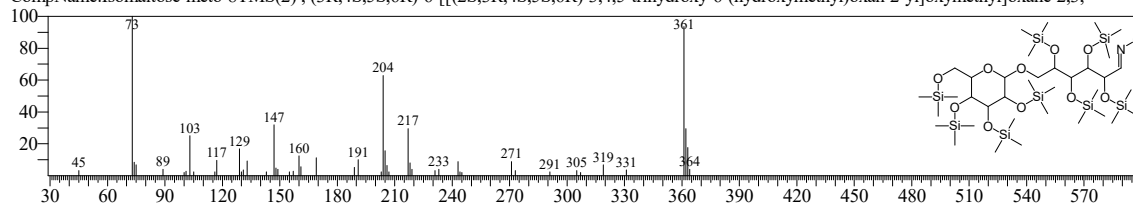

Hit#5 Entry:553 Library:OA\_TMS\_DB5\_67min\_V3.lib

SI:38 Formula:C37H89NO11Si8 CAS:69-79-4 MolWeight:947 RetIndex:2817

CompName:Maltose-meto-8TMS(1) ; (2R,3S,4S,5R,6R)-2-(hydroxymethyl)-6-[(2R,3S,4R,5R,6R)-4,5,6-trihydroxy-2-(hydroxymethyl)oxan-3-yl]oxy

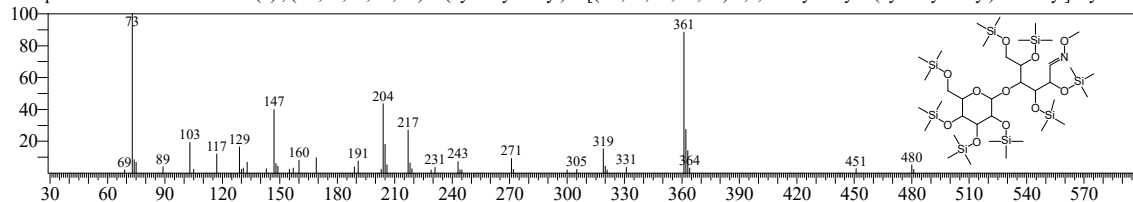

# TNAU

<< Target >>

Line#:4 R.Time:27.790(Scan#:4659) MassPeaks:322

RawMode:Averaged 27.785-27.795(4658-4660) BasePeak:361.20(2908)

BG Mode:Calc. from Peak Group 1 - Event 1 Q3 Scan

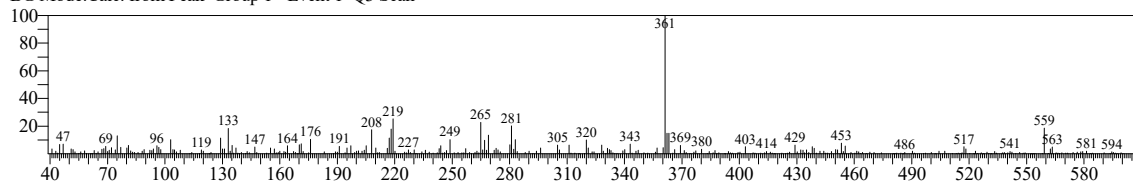

Hit#:1 Entry:541 Library:OA\_TMS\_DB5\_67min\_V3.lib

SI:48 Formula:C36H86O11Si8 CAS:57-50-1 MolWeight:918 RetIndex:2705

CompName:Sucrose-8TMS ; (2R,3R,4S,5S,6R)-2-[(2S,3S,4S,5R)-3,4-dihydroxy-2,5-bis(hydroxymethyl)oxolan-2-yl]oxy-6-(hydroxymethyl)oxane-3

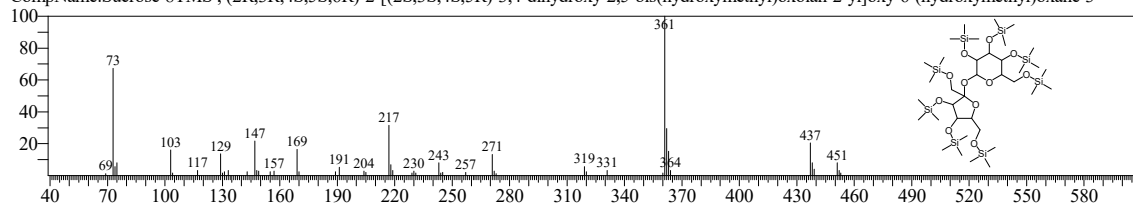

Hit#:2 Entry:552 Library:OA\_TMS\_DB5\_67min\_V3.lib

SI:48 Formula:C36H86O11Si8 CAS:99-20-7 MolWeight:918 RetIndex:2812

CompName:Trehalose-8TMS ; (2R,3S,4S,5R,6R)-2-(hydroxymethyl)-6-[(2R,3R,4S,5S,6R)-3,4,5-trihydroxy-6-(hydroxymethyl)oxan-2-yl]oxyoxane-

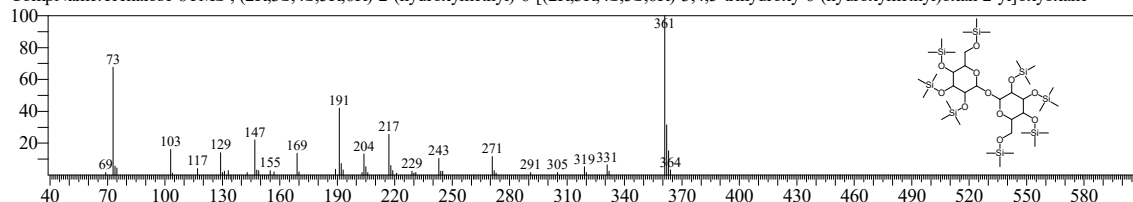

Hit#:3 Entry:560 Library:OA\_TMS\_DB5\_67min\_V3.lib

SI:43 Formula:C37H89NO11Si8 CAS:499-40-1 MolWeight:947 RetIndex:2947

CompName:Isomaltose-meto-8TMS(1) ; (3R,4S,5S,6R)-6-[[[(2S,3R,4S,5S,6R)-3,4,5-trihydroxy-6-(hydroxymethyl)oxan-2-yl]oxymethyl]oxane-2,3,

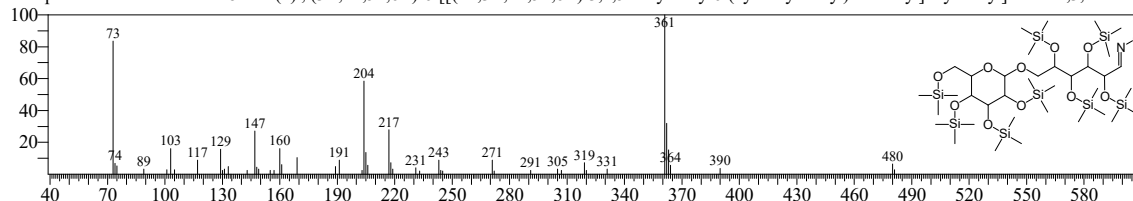

Hit#:4 Entry:559 Library:OA\_TMS\_DB5\_67min\_V3.lib

SI:42 Formula:C39H96O11Si9 CAS:585-88-6 MolWeight:992 RetIndex:2923

CompName:Maltitol-9TMS ; (2S,3R,4R,5R)-4-[(2R,3R,4S,5S,6R)-3,4,5-trihydroxy-6-(hydroxymethyl)oxan-2-yl]oxyhexane-1,2,3,5,6-pentol

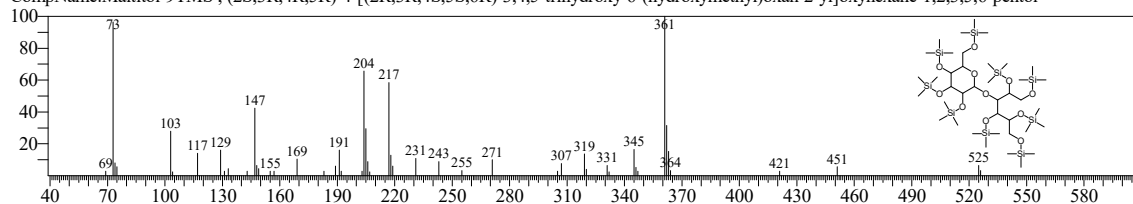

Hit#:5 Entry:326 Library:OA\_TMS\_DB5\_67min\_V3.lib

SI:32 Formula:C21H52O6Si5 CAS:23140-52-5 MolWeight:540 RetIndex:1841

CompName:Psicose-5TMS(2) ; (3R,4R,5R)-1,3,4,5,6-pentahydroxyhexan-2-one

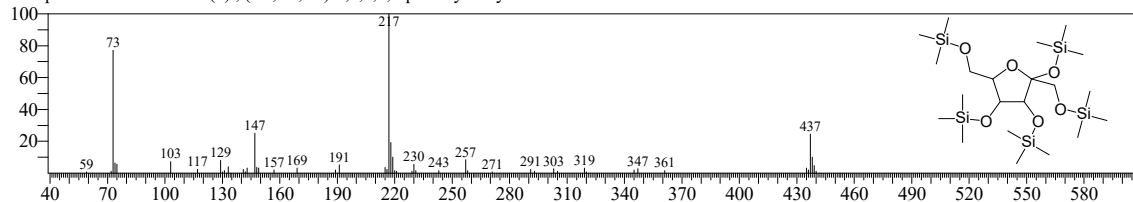

# TNAU

<< Target >>

Line#:5 R.Time:27.855(Scan#:4672) MassPeaks:308

RawMode:Averaged 27.850-27.860(4671-4673) BasePeak:207.05(1651)

BG Mode:Calc. from Peak Group 1 - Event 1 Q3 Scan

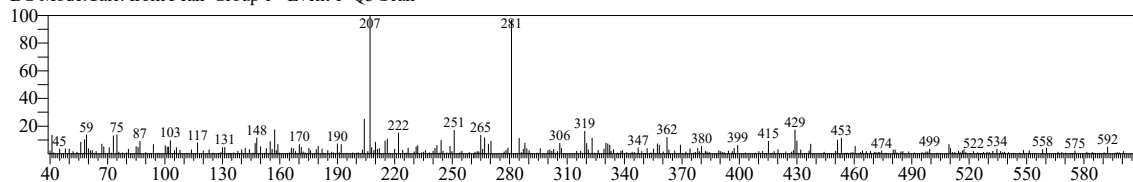

Hit#:1 Entry:380 Library:OA\_TMS\_DB5\_67min\_V3.lib

SI:35 Formula:C<sub>21</sub>H<sub>52</sub>O<sub>6</sub>Si<sub>5</sub> CAS:87-81-0 MolWeight:540 RetIndex:1914

CompName:Tagatose-5TMS(4) ; (3S,4S,5R)-1,3,4,5,6-pentahydroxyhexan-2-one

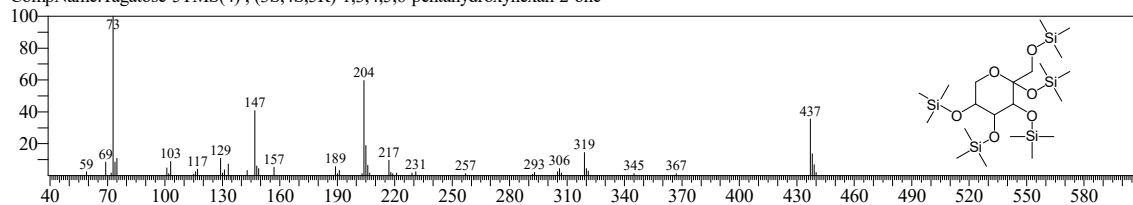

Hit#:2 Entry:360 Library:OA\_TMS\_DB5\_67min\_V3.lib

SI:35 Formula:C<sub>21</sub>H<sub>52</sub>O<sub>6</sub>Si<sub>5</sub> CAS:3615-56-3 MolWeight:540 RetIndex:1895

CompName:Sorbose-5TMS ; (3R,4S,5R)-1,3,4,5,6-pentahydroxyhexan-2-one

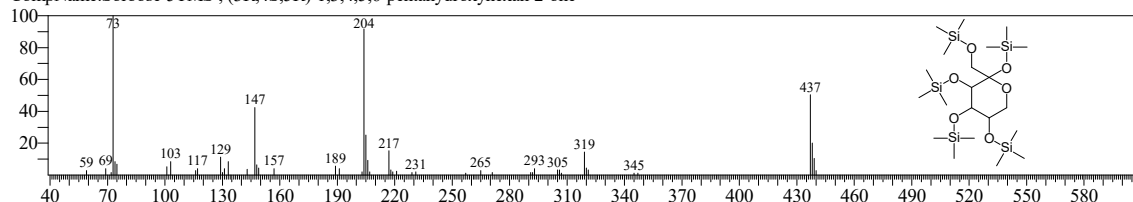

Hit#:3 Entry:387 Library:OA\_TMS\_DB5\_67min\_V3.lib

SI:33 Formula:C<sub>21</sub>H<sub>52</sub>O<sub>6</sub>Si<sub>5</sub> CAS:23140-52-5 MolWeight:540 RetIndex:1923

CompName:Psicose-5TMS(4) ; (3R,4R,5R)-1,3,4,5,6-pentahydroxyhexan-2-one

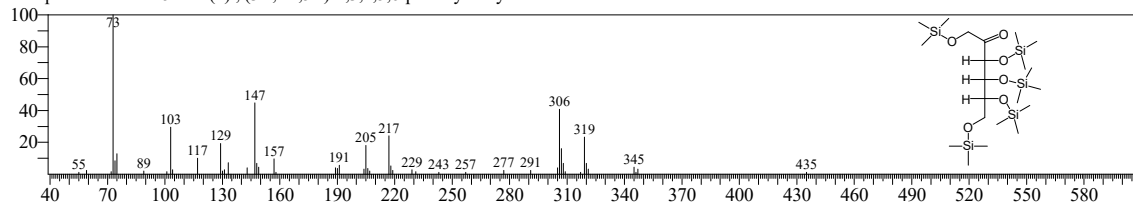

Hit#:4 Entry:555 Library:OA\_TMS\_DB5\_67min\_V3.lib

SI:33 Formula:C<sub>39</sub>H<sub>96</sub>O<sub>11</sub>Si<sub>9</sub> CAS:585-86-4 MolWeight:992 RetIndex:2845

CompName:Lactitol-9TMS ; (2S,3R,4R,5R)-4-[(2S,3R,4S,5R,6R)-3,4,5-trihydroxy-6-(hydroxymethyl)oxan-2-yl]oxyhexane-1,2,3,5,6-pentol

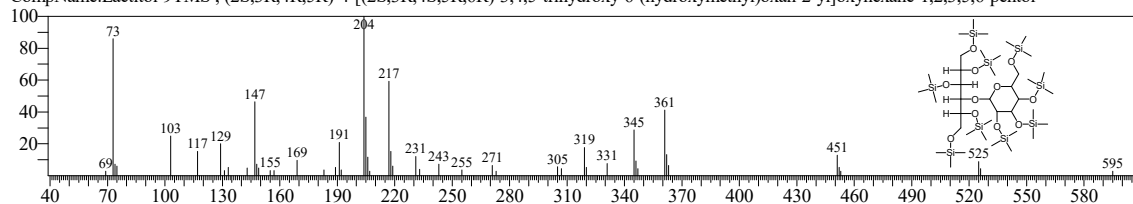

Hit#:5 Entry:334 Library:OA\_TMS\_DB5\_67min\_V3.lib

SI:33 Formula:C<sub>21</sub>H<sub>52</sub>O<sub>6</sub>Si<sub>5</sub> CAS:57-48-7 MolWeight:540 RetIndex:1852

CompName:Fructose-5TMS(3) ; (3S,4R,5R)-1,3,4,5,6-pentahydroxyhexan-2-one

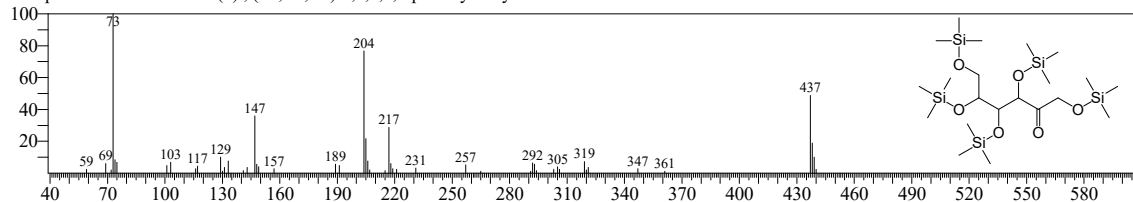

# TNAU

<< Target >>

Line#6 R.Time:27.955(Scan#:4692) MassPeaks:302

RawMode:Averaged 27.950-27.960(4691-4693) BasePeak:362.15(1406)

BG Mode:Calc. from Peak Group 1 - Event 1 Q3 Scan

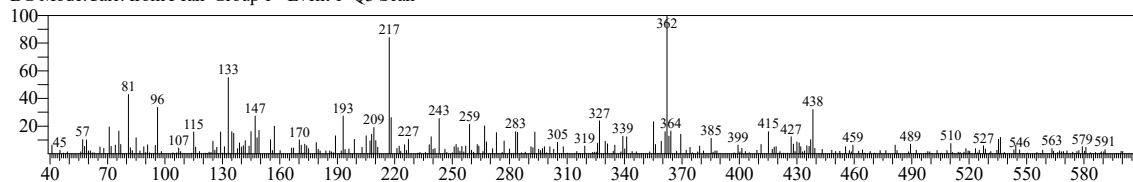

Hit#1 Entry:541 Library:OA\_TMS\_DB5\_67min\_V3.lib

SI:38 Formula:C36H86O11Si8 CAS:57-50-1 MolWeight:918 RetIndex:2705

CompName:Sucrose-8TMS ; (2R,3R,4S,5S,6R)-2-[(2S,3S,4S,5R)-3,4-dihydroxy-2,5-bis(hydroxymethyl)oxolan-2-yl]oxy-6-(hydroxymethyl)oxane-3

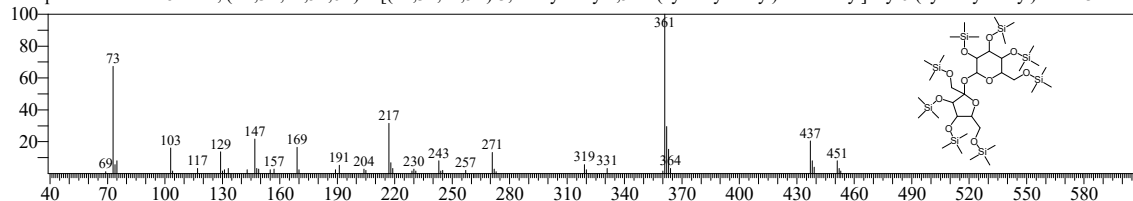

Hit#2 Entry:552 Library:OA\_TMS\_DB5\_67min\_V3.lib

SI:36 Formula:C36H86O11Si8 CAS:99-20-7 MolWeight:918 RetIndex:2812

CompName:Trehalose-8TMS ; (2R,3S,4S,5R,6R)-2-(hydroxymethyl)-6-[(2R,3R,4S,5S,6R)-3,4,5-trihydroxy-6-(hydroxymethyl)oxan-2-yl]oxyoxane-



Hit#3 Entry:559 Library:OA\_TMS\_DB5\_67min\_V3.lib

SI:36 Formula:C39H96O11Si9 CAS:585-88-6 MolWeight:992 RetIndex:2923

CompName:Maltitol-9TMS ; (2S,3R,4R,5R)-4-[(2R,3R,4S,5S,6R)-3,4,5-trihydroxy-6-(hydroxymethyl)oxan-2-yl]oxyhexane-1,2,3,5,6-pentol

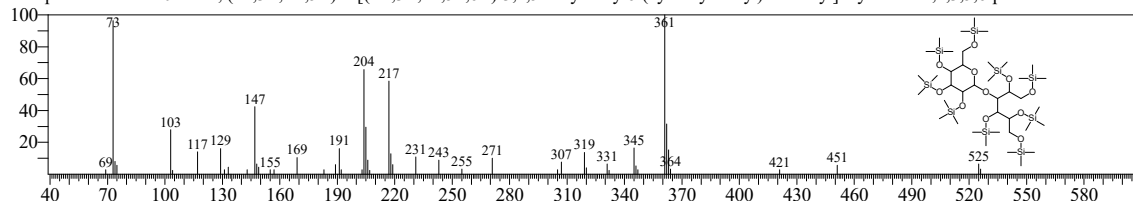

Hit#4 Entry:560 Library:OA\_TMS\_DB5\_67min\_V3.lib

SI:34 Formula:C37H89NO11Si8 CAS:499-40-1 MolWeight:947 RetIndex:2947

CompName:Isomaltose-meto-8TMS(1) ; (3R,4S,5S,6R)-6-[(2S,3R,4S,5S,6R)-3,4,5-trihydroxy-6-(hydroxymethyl)oxan-2-yl]oxymethyl]oxane-2,3,

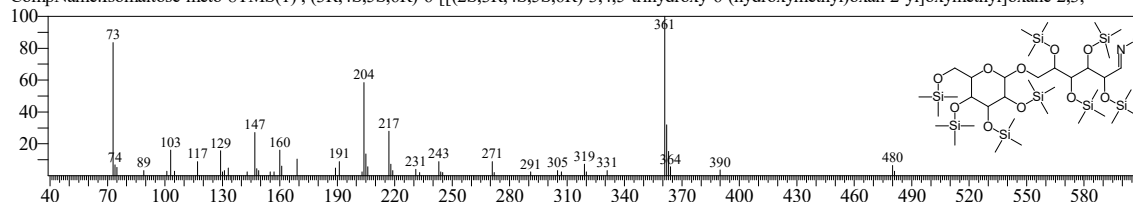

Hit#5 Entry:326 Library:OA\_TMS\_DB5\_67min\_V3.lib

SI:32 Formula:C21H52O6Si5 CAS:23140-52-5 MolWeight:540 RetIndex:1841

CompName:Psicose-5TMS(2) ; (3R,4R,5R)-1,3,4,5,6-pentahydroxyhexan-2-one

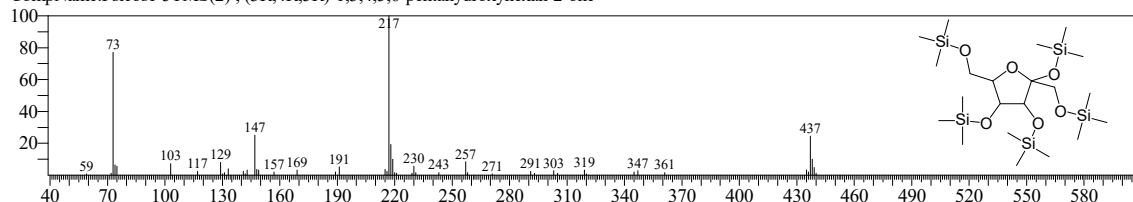

# TNAU

<< Target >>

Line#:7 R.Time:29.215(Scan#:4944) MassPeaks:335

RawMode:Averaged 29.210-29.220(4943-4945) BasePeak:207.05(1381)

BG Mode:Calc. from Peak Group 1 - Event 1 Q3 Scan

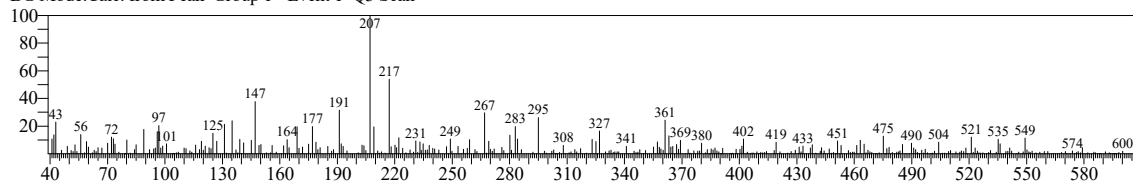

Hit#:1 Entry:232 Library:OA\_TMS\_DB5\_67min\_V3.lib

SI:35 Formula:C17H42O5Si4 CAS:10323-20-3 MolWeight:438 RetIndex:1667

CompName:Arabinose-4TMS(2) ; (2S,3R,4R)-2,3,4,5-tetrahydroxypentanal

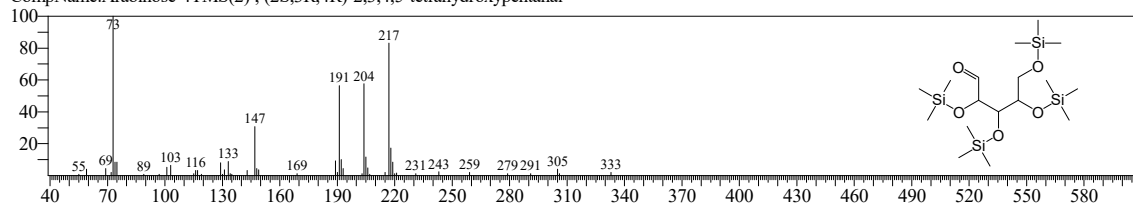

Hit#:2 Entry:236 Library:OA\_TMS\_DB5\_67min\_V3.lib

SI:34 Formula:C17H42O5Si4 CAS:50-69-1 MolWeight:438 RetIndex:1673

CompName:Ribose-4TMS(3) ; (3R,4S,5R)-5-(hydroxymethyl)oxolane-2,3,4-triol

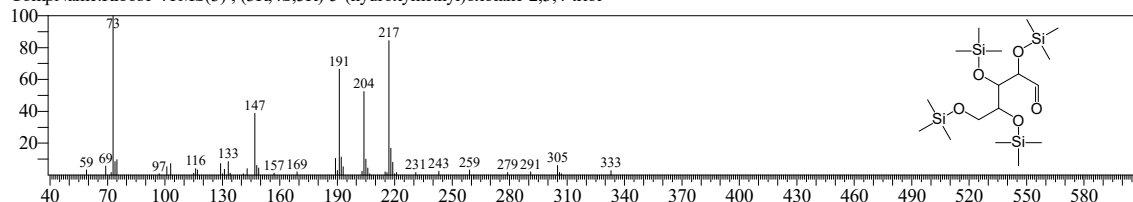

Hit#:3 Entry:295 Library:OA\_TMS\_DB5\_67min\_V3.lib

SI:34 Formula:C17H42O5Si4 CAS:58-86-6 MolWeight:438 RetIndex:1784

CompName:Xylose-4TMS(2) ; (2R,3S,4R)-2,3,4,5-tetrahydroxypentanal

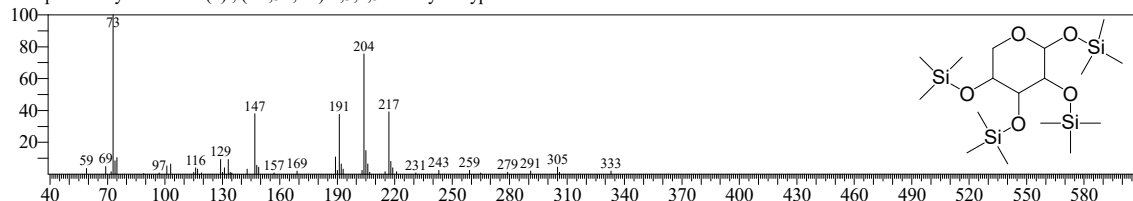

Hit#:4 Entry:238 Library:OA\_TMS\_DB5\_67min\_V3.lib

SI:34 Formula:C17H42O5Si4 CAS:1114-34-7 MolWeight:438 RetIndex:1675

CompName:Lyxose-4TMS(2) ; (2S,3S,4R)-2,3,4,5-tetrahydroxypentanal

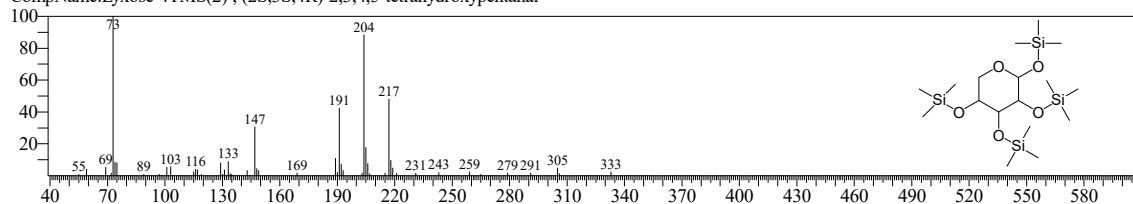

Hit#:5 Entry:559 Library:OA\_TMS\_DB5\_67min\_V3.lib

SI:33 Formula:C39H96O11Si9 CAS:585-88-6 MolWeight:992 RetIndex:2923

CompName:Maltitol-9TMS ; (2S,3R,4R,5R)-4-[(2R,3R,4S,5S,6R)-3,4,5-trihydroxy-6-(hydroxymethyl)oxan-2-yl]oxyhexane-1,2,3,5,6-pentol

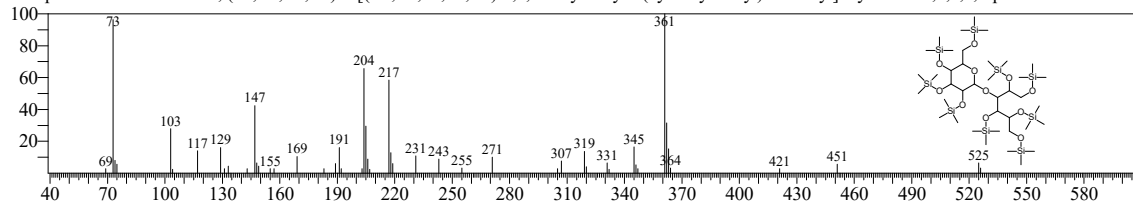



# TNAU

<< Target >>

Line#:8 R.Time:29.440(Scan#:4989) MassPeaks:274

RawMode:Averaged 29.435-29.445(4988-4990) BasePeak:207.05(1986)

BG Mode:Calc. from Peak Group 1 - Event 1 Q3 Scan

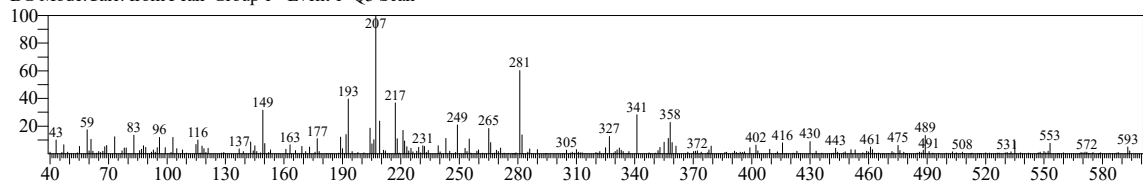

Hit#:1 Entry:238 Library:OA\_TMS\_DB5\_67min\_V3.lib

SI:41 Formula:C17H42O5Si4 CAS:1114-34-7 MolWeight:438 RetIndex:1675

CompName:Lyxose-4TMS(2) ; (2S,3S,4R)-2,3,4,5-tetrahydropentanal

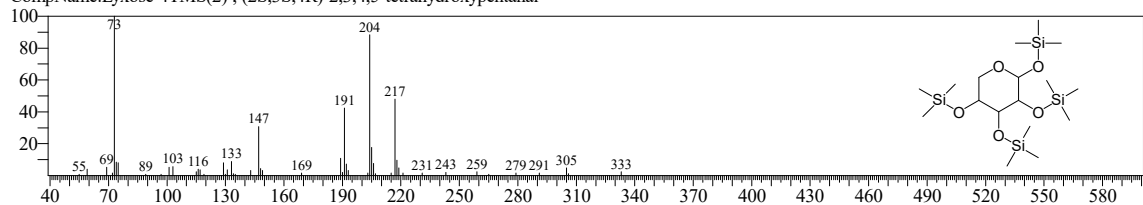

Hit#:2 Entry:250 Library:OA\_TMS\_DB5\_67min\_V3.lib

SI:40 Formula:C17H42O5Si4 CAS:50-69-1 MolWeight:438 RetIndex:1691

CompName:Ribose-4TMS(4) ; (3R,4S,5R)-5-(hydroxymethyl)oxolane-2,3,4-triol

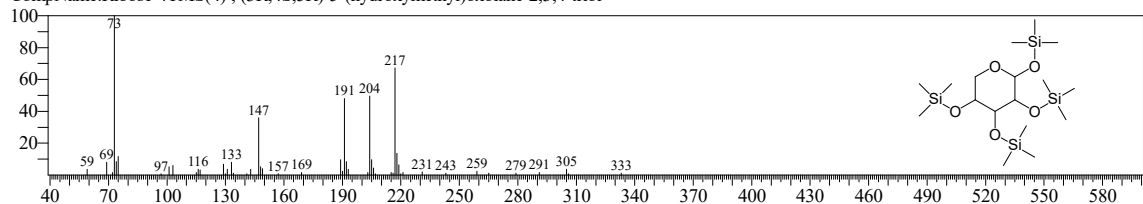

Hit#:3 Entry:210 Library:OA\_TMS\_DB5\_67min\_V3.lib

SI:40 Formula:C17H42O5Si4 CAS:10323-20-3 MolWeight:438 RetIndex:1634

CompName:Arabinose-4TMS(1) ; (2S,3R,4R)-2,3,4,5-tetrahydropentanal

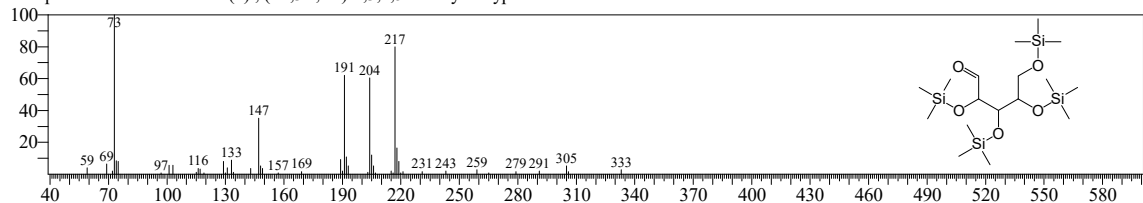

Hit#:4 Entry:295 Library:OA\_TMS\_DB5\_67min\_V3.lib

SI:40 Formula:C17H42O5Si4 CAS:58-86-6 MolWeight:438 RetIndex:1784

CompName:Xylose-4TMS(2) ; (2R,3S,4R)-2,3,4,5-tetrahydropentanal

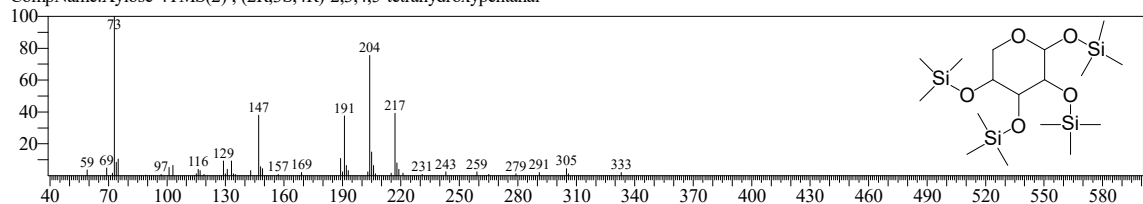

Hit#:5 Entry:535 Library:OA\_TMS\_DB5\_67min\_V3.lib

SI:39 Formula:C22H44N4O5Si4 CAS:58-63-9 MolWeight:556 RetIndex:2605

CompName:Inosine-4TMS ; 9-[(2R,3R,4S,5R)-3,4-dihydroxy-5-(hydroxymethyl)oxolan-2-yl]-3H-purin-6-one

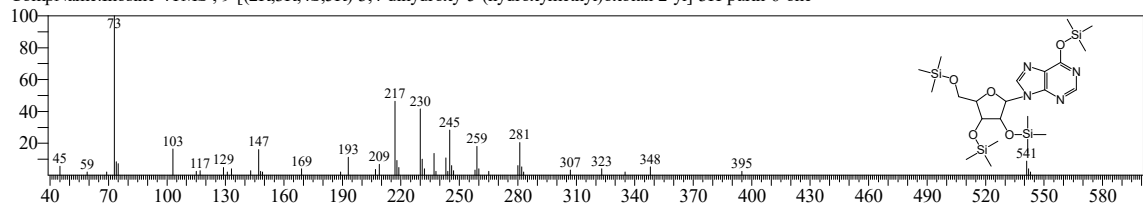

# TNAU

<< Target >>

Line#9 R.Time:30.040(Scan#:5109) MassPeaks:304

RawMode:Averaged 30.035-30.045(5108-5110) BasePeak:207.05(1829)

BG Mode:Calc. from Peak Group 1 - Event 1 Q3 Scan

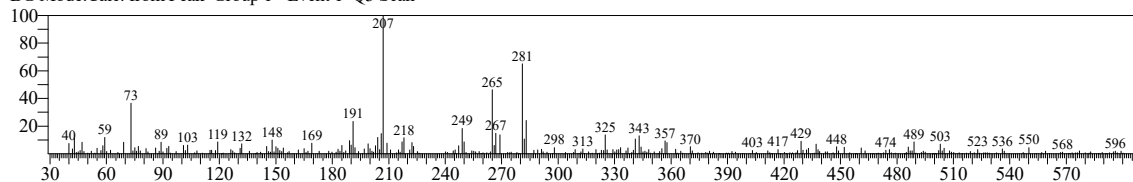

Hit#:1 Entry:328 Library:OA TMS DB5\_67min\_V3.lib

SI:42 Formula:C13H23NO2Si2 CAS:150-13-0 MolWeight:281 RetIndex:1845

CompName:4-Aminobenzoic acid-2TMS ; 4-aminobenzoic acid

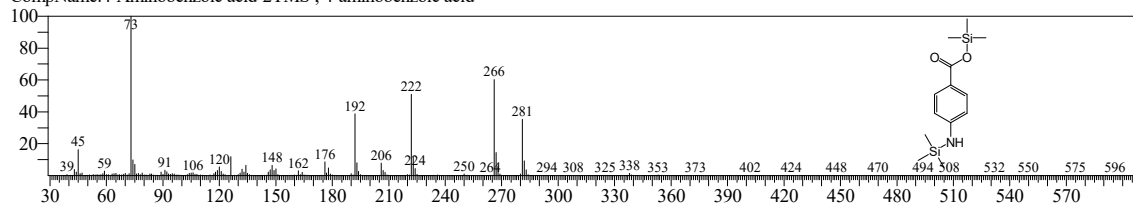

Hit#:2 Entry:310 Library:OA TMS DB5\_67min\_V3.lib

SI:42 Formula:C11H20N4OSi2 CAS:68-94-0 MolWeight:280 RetIndex:1822

CompName:Hypoxanthine-2TMS ; 3,7-dihydropurin-6-one

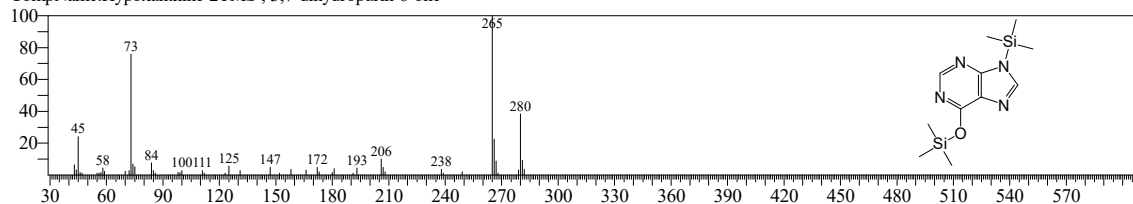

Hit#:3 Entry:238 Library:OA TMS DB5\_67min\_V3.lib

SI:41 Formula:C17H42O5Si4 CAS:1114-34-7 MolWeight:438 RetIndex:1675

CompName:Lyxose-4TMS(2) ; (2S,3S,4R)-2,3,4,5-tetrahydroxypentanal

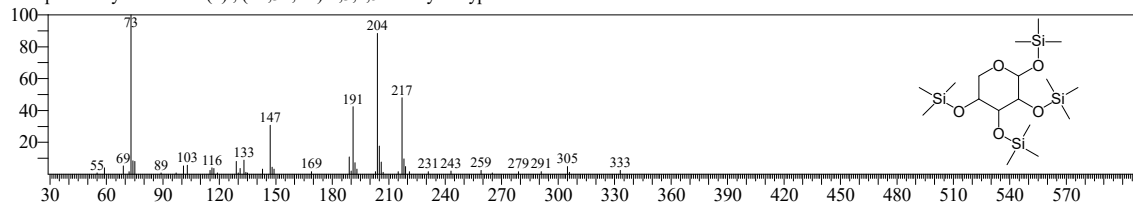

Hit#:4 Entry:295 Library:OA TMS DB5\_67min\_V3.lib

SI:41 Formula:C17H42O5Si4 CAS:58-86-6 MolWeight:438 RetIndex:1784

CompName:Xylose-4TMS(2) ; (2R,3S,4R)-2,3,4,5-tetrahydroxypentanal

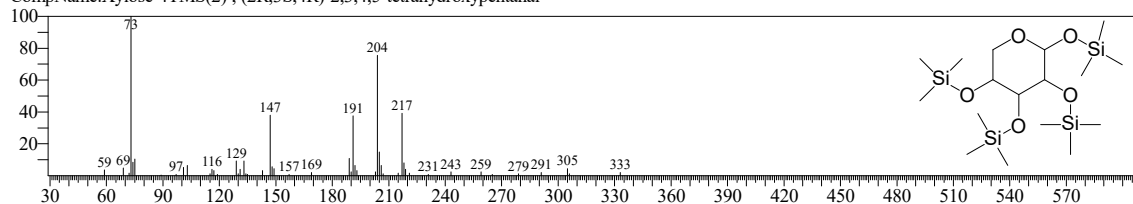

Hit#:5 Entry:210 Library:OA TMS DB5\_67min\_V3.lib

SI:41 Formula:C17H42O5Si4 CAS:10323-20-3 MolWeight:438 RetIndex:1634

CompName:Arabinose-4TMS(1) ; (2S,3R,4R)-2,3,4,5-tetrahydroxypentanal

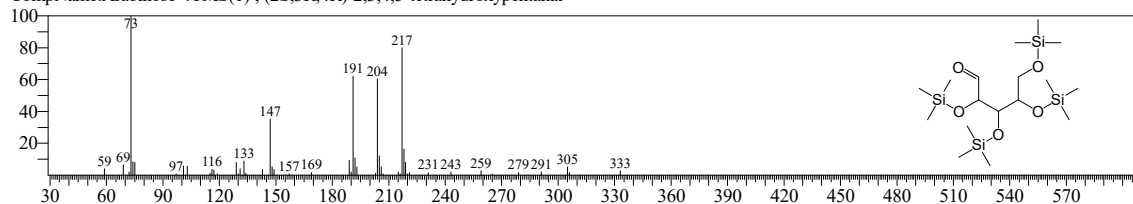

# TNAU

<< Target >>

Line#:10 R.Time:30.165(Scan#:5134) MassPeaks:280

RawMode:Averaged 30.160-30.170(5133-5135) BasePeak:207.05(2665)

BG Mode:Calc. from Peak Group 1 - Event 1 Q3 Scan

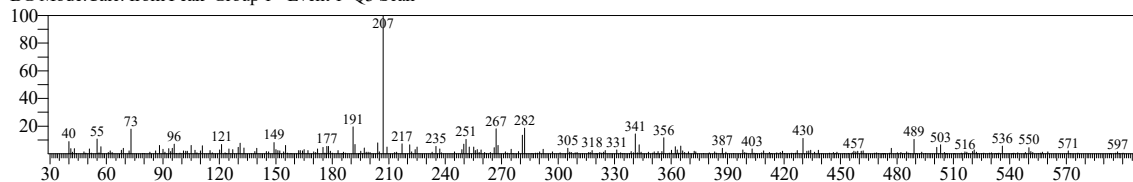

Hit#:1 Entry:252 Library:OA\_TMS\_DB5\_67min\_V3.lib

SI:38 Formula:C<sub>18</sub>H<sub>44</sub>O<sub>5</sub>Si<sub>4</sub> CAS:3615-37-0 MolWeight:452 RetIndex:1695

CompName:Fucose-4TMS(1) ; (2S,3R,4S,5R,6R)-6-methyloxane-2,3,4,5-tetrol

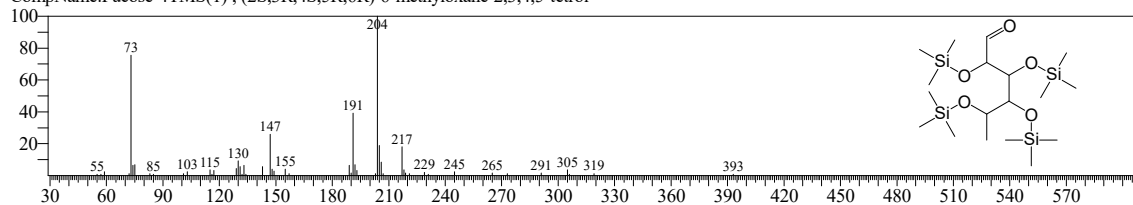

Hit#:2 Entry:219 Library:OA\_TMS\_DB5\_67min\_V3.lib

SI:37 Formula:C<sub>18</sub>H<sub>44</sub>O<sub>5</sub>Si<sub>4</sub> CAS:10485-94-6 MolWeight:452 RetIndex:1646

CompName:Rhamnose-4TMS(1) ; (2R,3R,4S,5S)-2,3,4,5-tetrahydroxyhexanal

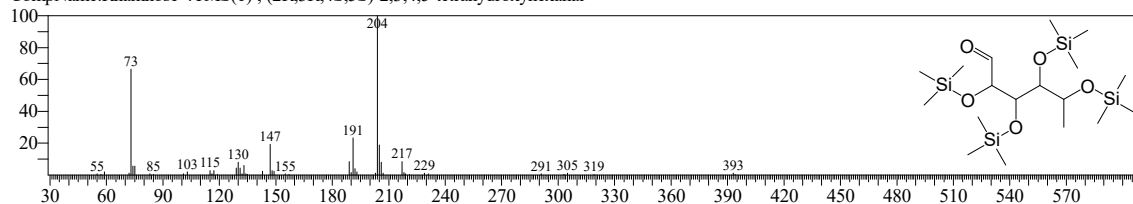

Hit#:3 Entry:232 Library:OA\_TMS\_DB5\_67min\_V3.lib

SI:36 Formula:C<sub>17</sub>H<sub>42</sub>O<sub>5</sub>Si<sub>4</sub> CAS:10323-20-3 MolWeight:438 RetIndex:1667

CompName:Arabinose-4TMS(2) ; (2S,3R,4R)-2,3,4,5-tetrahydroxypentanal

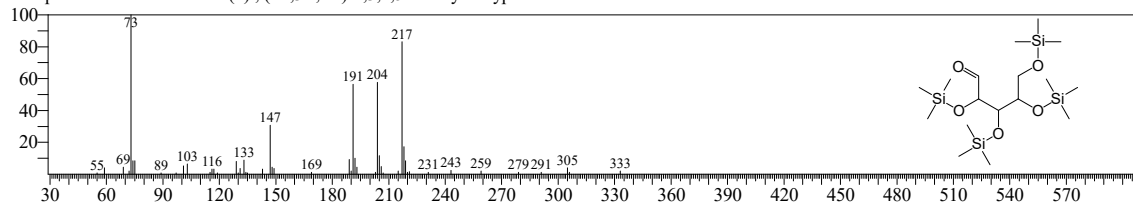

Hit#:4 Entry:328 Library:OA\_TMS\_DB5\_67min\_V3.lib

SI:36 Formula:C<sub>13</sub>H<sub>23</sub>NO<sub>2</sub>Si<sub>2</sub> CAS:150-13-0 MolWeight:281 RetIndex:1845

CompName:4-Aminobenzoic acid-2TMS ; 4-aminobenzoic acid

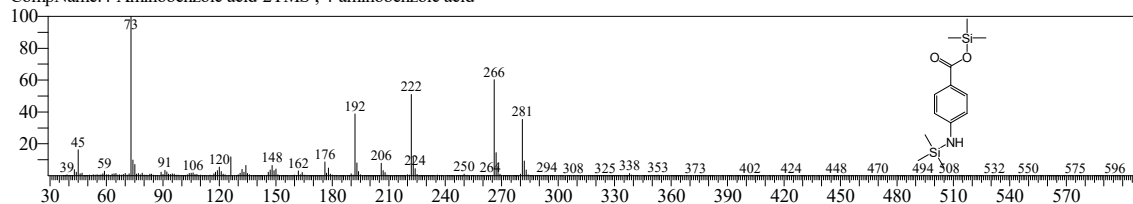

Hit#:5 Entry:238 Library:OA\_TMS\_DB5\_67min\_V3.lib

SI:36 Formula:C<sub>17</sub>H<sub>42</sub>O<sub>5</sub>Si<sub>4</sub> CAS:1114-34-7 MolWeight:438 RetIndex:1675

CompName:Lyxose-4TMS(2) ; (2S,3S,4R)-2,3,4,5-tetrahydroxypentanal

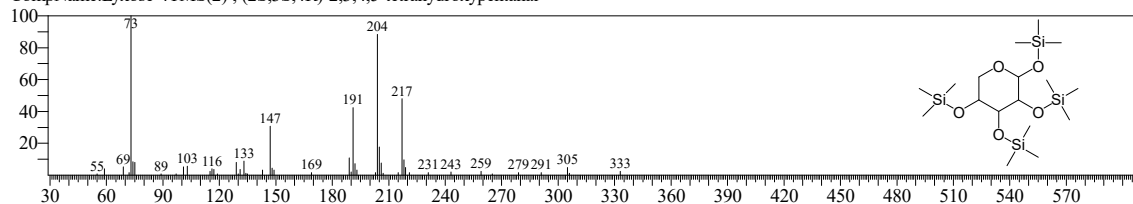

# TNAU

<< Target >>

Line#:11 R.Time:30.740(Scan#:5249) MassPeaks:298

RawMode:Averaged 30.735-30.745(5248-5250) BasePeak:281.05(1083)

BG Mode:Calc. from Peak Group 1 - Event 1 Q3 Scan

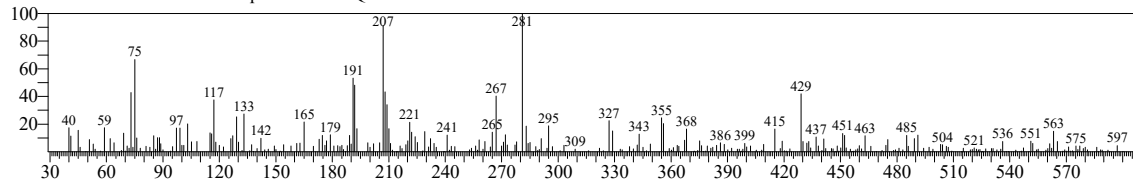

Hit#:1 Entry:343 Library:OA TMS DB5\_67min\_V3.lib

SI:39 Formula:C18H37NO3Si3 CAS:51-43-4 MolWeight:399 RetIndex:1868

CompName:Epinephrine-3TMS ; 4-[(1R)-1-hydroxy-2-(methylamino)ethyl]benzene-1,2-diol

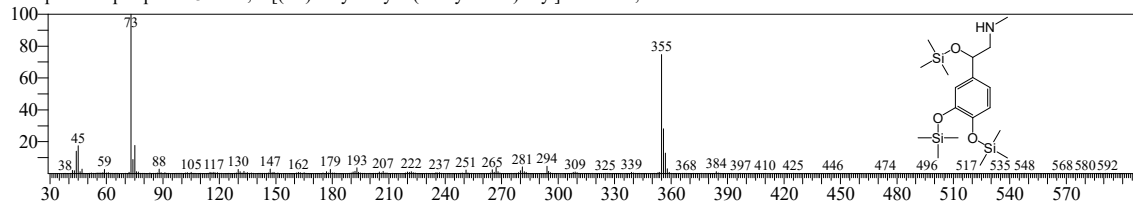

Hit#:2 Entry:402 Library:OA TMS DB5\_67min\_V3.lib

SI:38 Formula:C20H42O4Si4 CAS:775-01-9 MolWeight:458 RetIndex:1942

CompName:3,4-Dihydroxymandelic acid-4TMS ; 2-(3,4-dihydroxyphenyl)-2-hydroxyacetic acid

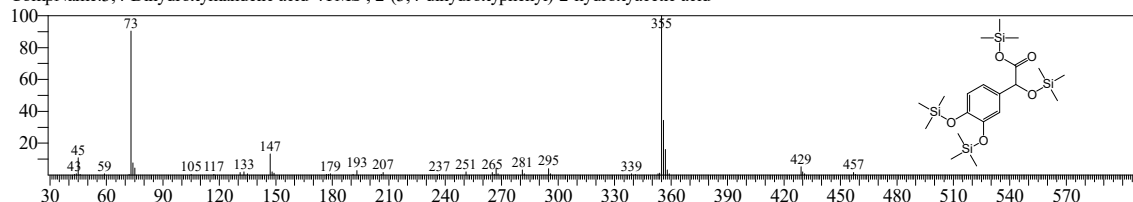

Hit#:3 Entry:328 Library:OA TMS DB5\_67min\_V3.lib

SI:35 Formula:C13H23NO2Si2 CAS:150-13-0 MolWeight:281 RetIndex:1845

CompName:4-Aminobenzoic acid-2TMS ; 4-aminobenzoic acid

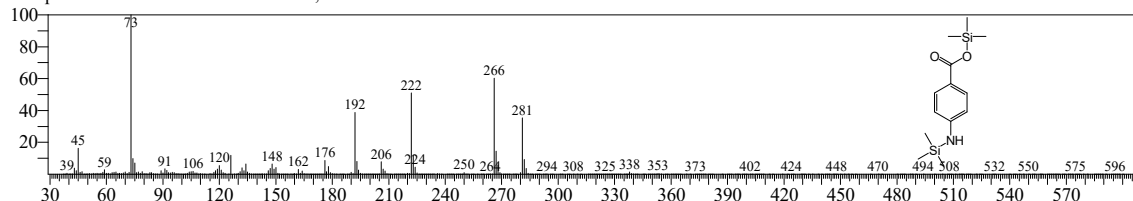

Hit#:4 Entry:548 Library:OA TMS DB5\_67min\_V3.lib

SI:35 Formula:C17H31N5O3SSi2 CAS:2457-80-9 MolWeight:441 RetIndex:2787

CompName:5'-Methylthioadenosine-2TMS ; (2R,3R,4S,5S)-2-(6-aminopurin-9-yl)-5-(methylsulfanylmethyl)oxolane-3,4-diol

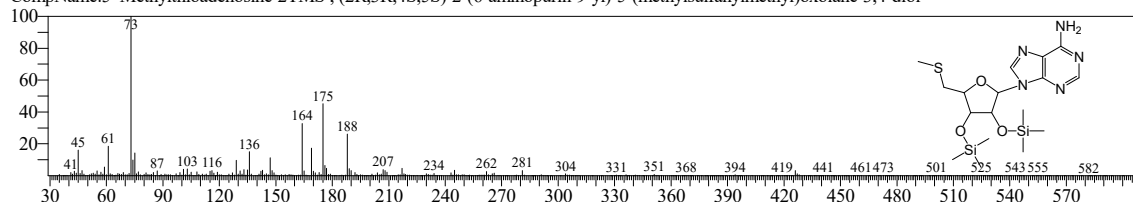

Hit#:5 Entry:290 Library:OA TMS DB5\_67min\_V3.lib

SI:34 Formula:C13H23NO3Si2 CAS:548-93-6 MolWeight:297 RetIndex:1773

CompName:3-Hydroxyanthranilic acid-2TMS ; 2-amino-3-hydroxybenzoic acid

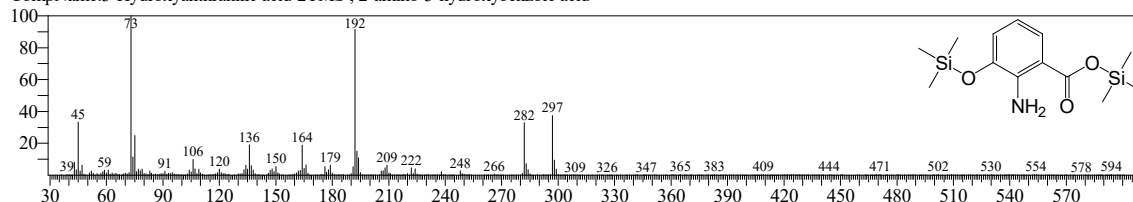

# TNAU

<< Target >>

Line#:12 R.Time:31.485(Scan#:5398) MassPeaks:287

RawMode:Averaged 31.480-31.490(5397-5399) BasePeak:207.05(1841)

BG Mode:Calc. from Peak Group 1 - Event 1 Q3 Scan

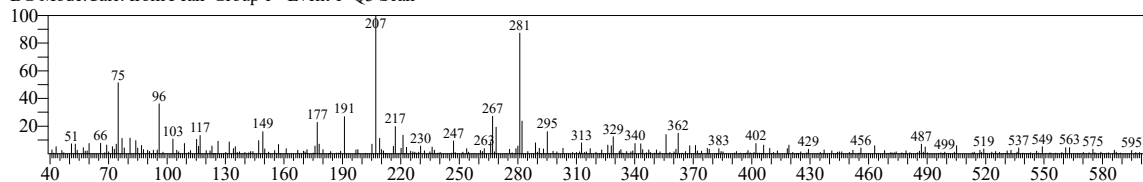

Hit#:1 Entry:211 Library:OA\_TMS\_DB5\_67min\_V3.lib

SI:30 Formula:C<sub>13</sub>H<sub>22</sub>O<sub>3</sub>Si<sub>2</sub> CAS:99-96-7 MolWeight:282 RetIndex:1636

CompName:4-Hydroxybenzoic acid-2TMS ; 4-hydroxybenzoic acid

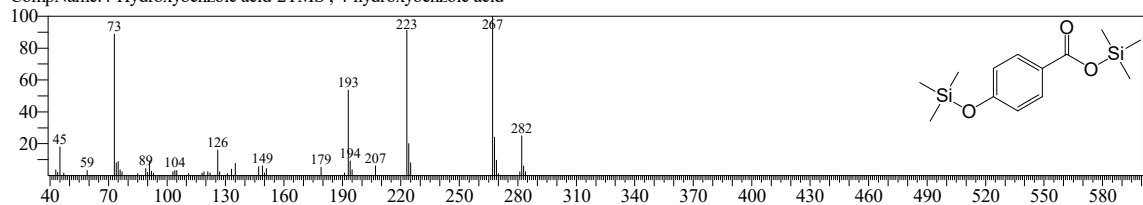

Hit#:2 Entry:203 Library:OA\_TMS\_DB5\_67min\_V3.lib

SI:30 Formula:C<sub>13</sub>H<sub>23</sub>NO<sub>2</sub>Si<sub>2</sub> CAS:118-92-3 MolWeight:281 RetIndex:1623

CompName:Anthranilic acid-2TMS ; 2-aminobenzoic acid

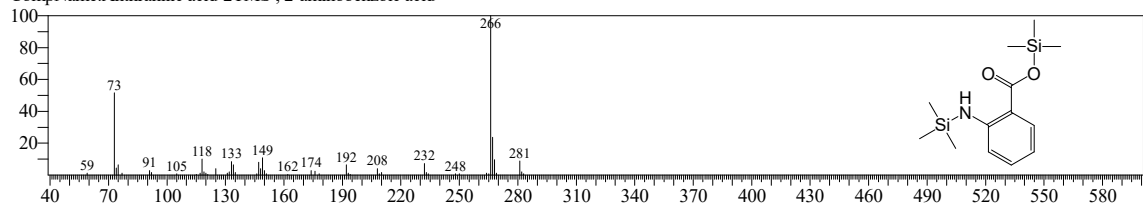

Hit#:3 Entry:13 Library:OA\_TMS\_DB5\_67min\_V3.lib

SI:29 Formula:C<sub>8</sub>H<sub>20</sub>O<sub>3</sub>Si<sub>2</sub> CAS:79-14-1 MolWeight:220 RetIndex:1074

CompName:Glycolic acid-2TMS ; 2-hydroxyacetic acid

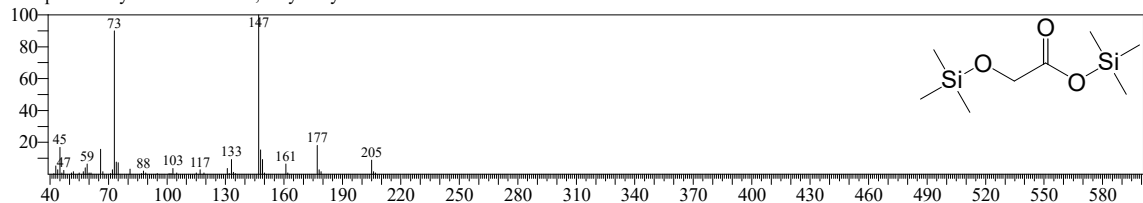

Hit#:4 Entry:179 Library:OA\_TMS\_DB5\_67min\_V3.lib

SI:29 Formula:C<sub>13</sub>H<sub>22</sub>O<sub>3</sub>Si<sub>2</sub> CAS:99-06-9 MolWeight:282 RetIndex:1572

CompName:3-Hydroxybenzoic acid-2TMS ; 3-hydroxybenzoic acid

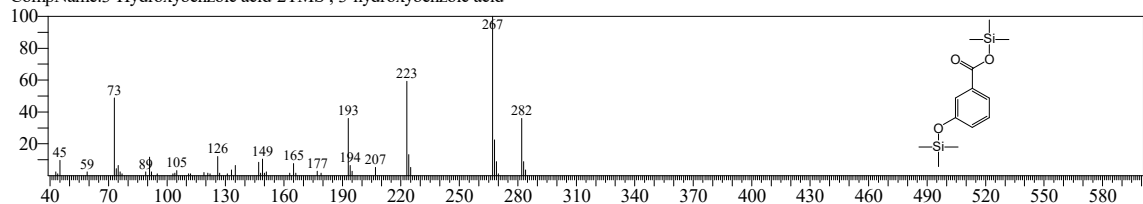

Hit#:5 Entry:341 Library:OA\_TMS\_DB5\_67min\_V3.lib

SI:29 Formula:C<sub>18</sub>H<sub>34</sub>O<sub>4</sub>Si<sub>3</sub> CAS:3247-75-4 MolWeight:398 RetIndex:1864

CompName:3-(3-Hydroxyphenyl)-3-hydroxypropionic acid-3TMS ; 3-hydroxy-3-(3-hydroxyphenyl)propanoic acid

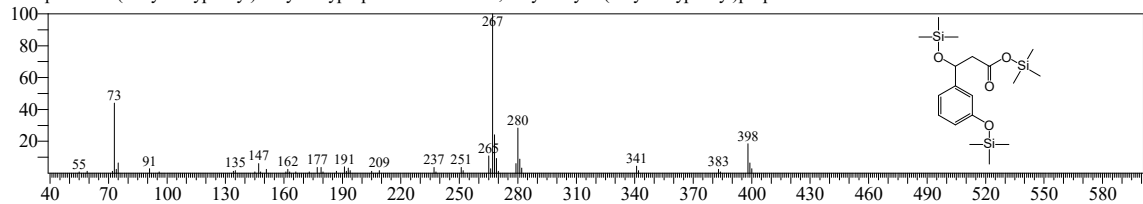

# TNAU

<< Target >>

Line#:13 R.Time:31.920(Scan#:5485) MassPeaks:317

RawMode:Averaged 31.915-31.925(5484-5486) BasePeak:139.15(888)

BG Mode:Calc. from Peak Group 1 - Event 1 Q3 Scan

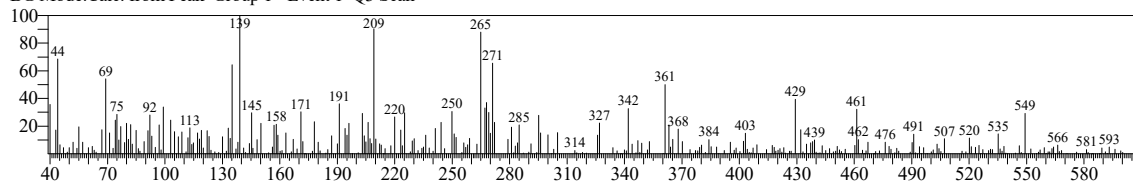

Hit#:1 Entry:341 Library:OA\_TMS\_DB5\_67min\_V3.lib

SI:23 Formula:C18H34O4Si3 CAS:3247-75-4 MolWeight:398 RetIndex:1864

CompName:3-(3-Hydroxyphenyl)-3-hydroxypropionic acid-3TMS ; 3-hydroxy-3-(3-hydroxyphenyl)propanoic acid

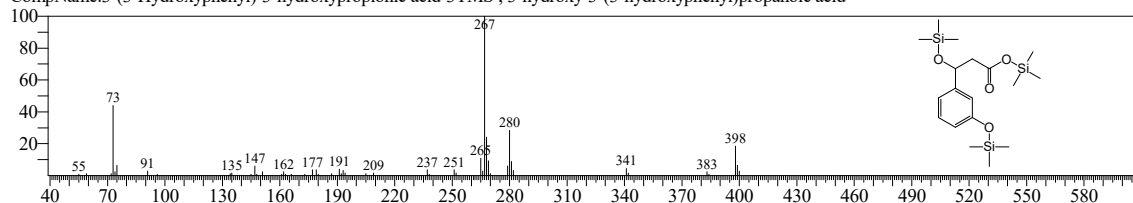

Hit#:2 Entry:552 Library:OA\_TMS\_DB5\_67min\_V3.lib

SI:22 Formula:C36H86O11Si8 CAS:99-20-7 MolWeight:918 RetIndex:2812

CompName:Trehalose-8TMS ; (2R,3S,4S,5R,6R)-2-(hydroxymethyl)-6-[(2R,3R,4S,5S,6R)-3,4,5-trihydroxy-6-(hydroxymethyl)oxan-2-yl]oxyoxane-



Hit#:3 Entry:477 Library:OA\_TMS\_DB5\_67min\_V3.lib

SI:21 Formula:C21H46OSi CAS:112-92-5 MolWeight:342 RetIndex:2156

CompName:Octadecanol-TMS ; octadecan-1-ol

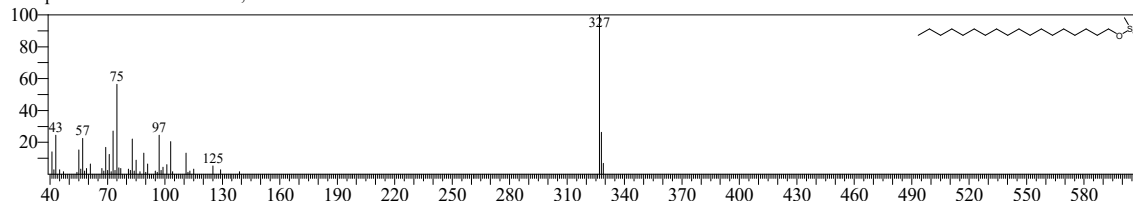

Hit#:4 Entry:211 Library:OA\_TMS\_DB5\_67min\_V3.lib

SI:21 Formula:C13H22O3Si2 CAS:99-96-7 MolWeight:282 RetIndex:1636

CompName:4-Hydroxybenzoic acid-2TMS ; 4-hydroxybenzoic acid

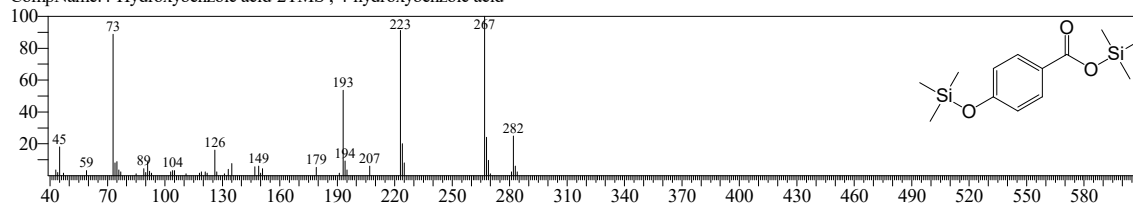

Hit#:5 Entry:310 Library:OA\_TMS\_DB5\_67min\_V3.lib

SI:21 Formula:C11H20N4OSi2 CAS:68-94-0 MolWeight:280 RetIndex:1822

CompName:Hypoxanthine-2TMS ; 3,7-dihydropurin-6-one

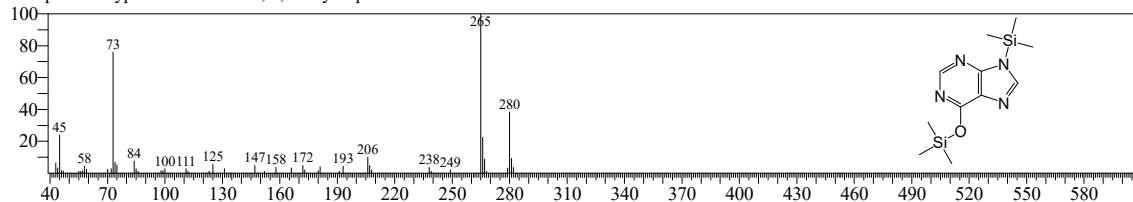

# TNAU

<< Target >>

Line#:14 R.Time:31.985(Scan#:5498) MassPeaks:275

RawMode:Averaged 31.980-31.990(5497-5499) BasePeak:208.00(1198)

BG Mode:Calc. from Peak Group 1 - Event 1 Q3 Scan

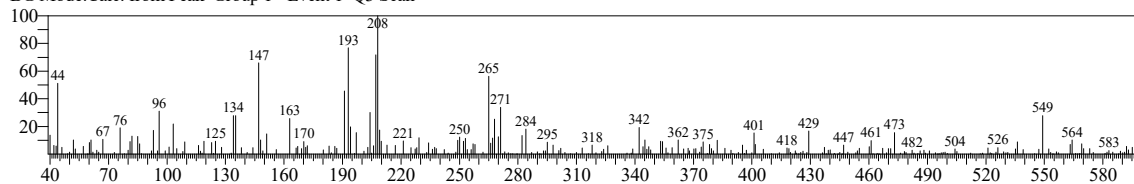

Hit#:1 Entry:150 Library:OA TMS DB5 67min V3.lib

SI:31 Formula:C15H26O3Si2 CAS:515-30-0 MolWeight:310 RetIndex:1517

CompName:2-Phenyllactic acid-2TMS ; 2-hydroxy-3-phenylpropanoic acid

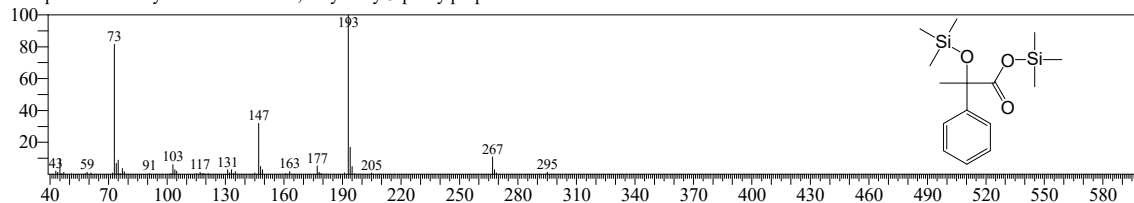

Hit#:2 Entry:211 Library:OA TMS DB5 67min V3.lib

SI:31 Formula:C13H22O3Si2 CAS:99-96-7 MolWeight:282 RetIndex:1636

CompName:4-Hydroxybenzoic acid-2TMS ; 4-hydroxybenzoic acid

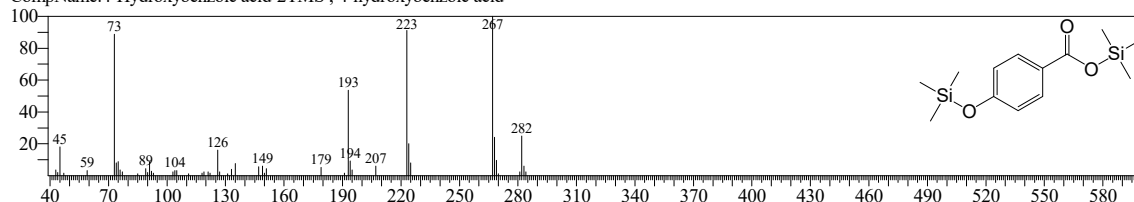

Hit#:3 Entry:179 Library:OA TMS DB5 67min V3.lib

SI:30 Formula:C13H22O3Si2 CAS:99-06-9 MolWeight:282 RetIndex:1572

CompName:3-Hydroxybenzoic acid-2TMS ; 3-hydroxybenzoic acid

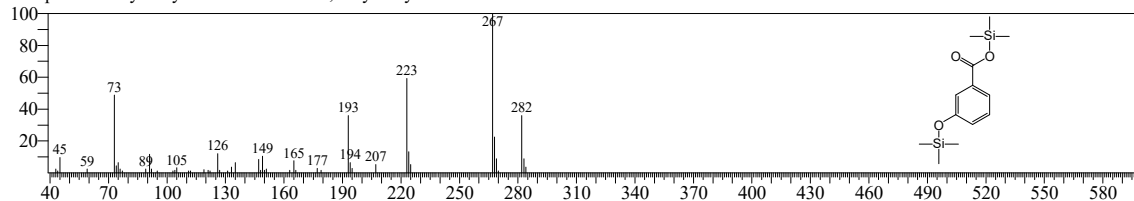

Hit#:4 Entry:25 Library:OA TMS DB5 67min V3.lib

SI:29 Formula: C13H22O3Si2 CAS:0-00-0 MolWeight:251 RetIndex:1130

CompName:2-Hydroxybutyric acid-d3-2TMS ;

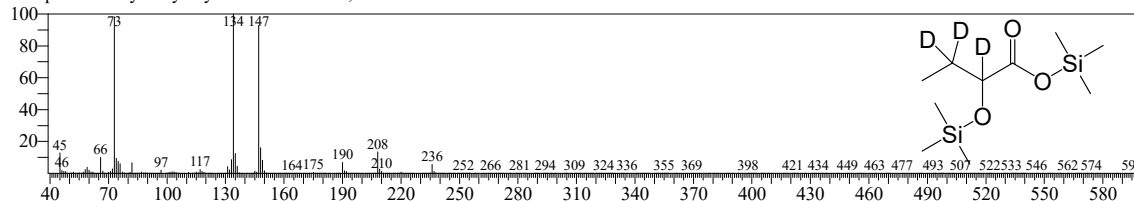

Hit#:5 Entry:345 Library:OA TMS DB5 67min V3.lib

SI:29 Formula: C21H52O6Si5 CAS:59-23-4 MolWeight:540 RetIndex:1868

CompName:Galactose-5TMS(2) ; (3R,4S,5R,6R)-6-(hydroxymethyl)oxane-2,3,4,5-tetrol

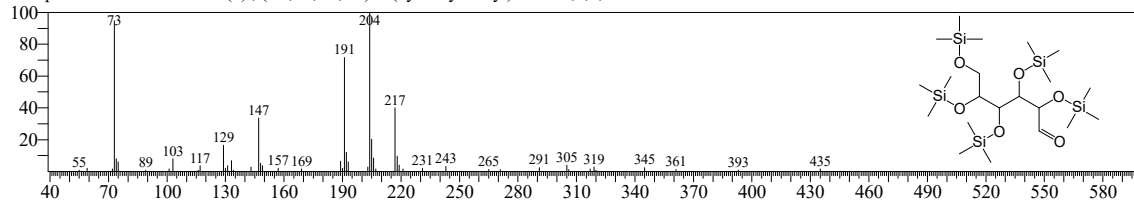

Supplement: Supplementary file 16 [file supplementary]
