# Supplementary material for: Comparative Metabolomics Profiling Reveals Key Metabolites and Associated Pathways Regulating Tuber Dormancy in White Yam (<em>Dioscorea rotundata</em>)
Source: Preprints.org preprint supplement (doi:10.20944/preprints202303.0378.v1), 2023-03-21

# TNAU

## Sample Information

Analyzed by : Admin  
 Analyzed : 02-Sep-22 10:35:58 PM  
 Sample Type : Unknown  
 Level # : 1  
 Sample Name : Sample  
 Sample ID : 11-3  
 IS Amount : [1]=1  
 Sample Amount : 1  
 Dilution Factor : 1  
 Vial # : 12  
 Injection Volume : 5.00  
 Data File : D:\GCMS-8040NX\Sep 2022\Users\01.09.2022\01092022034.qgd  
 Org Data File : D:\GCMS-8040NX\Sep 2022\Users\01.09.2022\01092022034.qgd  
 Method File : D:\GCMS-8040NX\Sep 2022\Method\Scan\_methodfile.qgm  
 Org Method File : D:\GCMS-8040NX\Sep 2022\Method\Scan\_methodfile.qgm  
 Report File :  
 Tuning File : D:\GCMS-8040NX\Aug 2022\Tuning Data\TUNING 25082022.qgt  
 Modified by : Admin  
 Modified : 05-Sep-22 11:12:02 AM

Chromatogram Sample D:\GCMS-8040NX\Sep 2022\Users\01.09.2022\01092022034.qgd

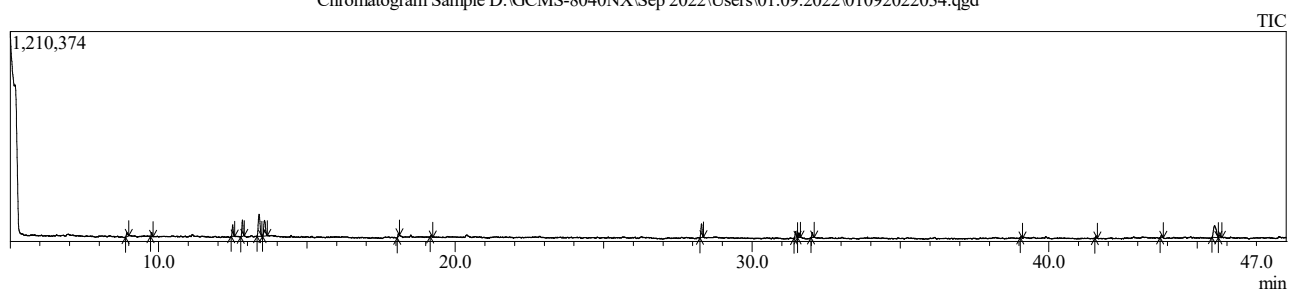

## Peak Report TIC

| Peak# | R.Time | Area    | Area%  | Height | Height% | A/H  | Similarity | Name                                    |
|-------|--------|---------|--------|--------|---------|------|------------|-----------------------------------------|
| 1     | 8.935  | 72276   | 2.80   | 21125  | 2.86    | 3.42 | 82         | 1-Butanol, 3-methyl-, acetate           |
| 2     | 9.767  | 49632   | 1.92   | 23423  | 3.17    | 2.12 | 95         | Pentasiloxane, dodecamethyl-            |
| 3     | 12.498 | 173273  | 6.71   | 66730  | 9.04    | 2.60 | 73         | 2,5-Cyclohexadiene-1,4-dione, dioxime   |
| 4     | 12.825 | 231780  | 8.97   | 93497  | 12.66   | 2.48 | 73         | 2,5-Cyclohexadiene-1,4-dione, dioxime   |
| 5     | 13.387 | 531508  | 20.58  | 126006 | 17.06   | 4.22 | 51         | Methyl cis-13,16-Docosadienate          |
| 6     | 13.570 | 374409  | 14.50  | 90064  | 12.20   | 4.16 | 53         | Methyl cis-13,16-Docosadienate          |
| 7     | 18.089 | 40136   | 1.55   | 13759  | 1.86    | 2.92 | 88         | .beta.-D-Glucopyranose, 1,6-anhydro-    |
| 8     | 19.193 | 25847   | 1.00   | 11138  | 1.51    | 2.32 | 84         | 2,4-Di-tert-butylphenoxytrimethylsilane |
| 9     | 28.297 | 211864  | 8.20   | 78292  | 10.60   | 2.71 | 95         | n-Hexadecanoic acid                     |
| 10    | 31.468 | 106963  | 4.14   | 37556  | 5.09    | 2.85 | 95         | 9,12-Octadecadienoic acid (Z,Z)-        |
| 11    | 31.583 | 73036   | 2.83   | 25149  | 3.41    | 2.90 | 86         | cis-9-Hexadecenal                       |
| 12    | 32.030 | 75955   | 2.94   | 29258  | 3.96    | 2.60 | 92         | Octadecanoic acid                       |
| 13    | 39.072 | 24412   | 0.95   | 11214  | 1.52    | 2.18 | 81         | Tetracosamethyl-cyclododecasiloxane     |
| 14    | 41.600 | 35354   | 1.37   | 13445  | 1.82    | 2.63 | 83         | Tetracosamethyl-cyclododecasiloxane     |
| 15    | 43.798 | 46335   | 1.79   | 16665  | 2.26    | 2.78 | 84         | Tetracosamethyl-cyclododecasiloxane     |
| 16    | 45.595 | 452739  | 17.53  | 66381  | 8.99    | 6.82 | 91         | Diosgenin                               |
| 17    | 45.774 | 57444   | 2.22   | 14734  | 2.00    | 3.90 | 82         | Tetracosamethyl-cyclododecasiloxane     |
|       |        | 2582963 | 100.00 | 738436 | 100.00  |      |            |                                         |

Library

# TNAU

<< Target >>

Line#:1 R.Time:8.935(Scan#:788) MassPeaks:330

RawMode:Averaged 8.930-8.940(787-789) BasePeak:43.05(4206)

BG Mode:Calc. from Peak Group 1 - Event 1 Q3 Scan

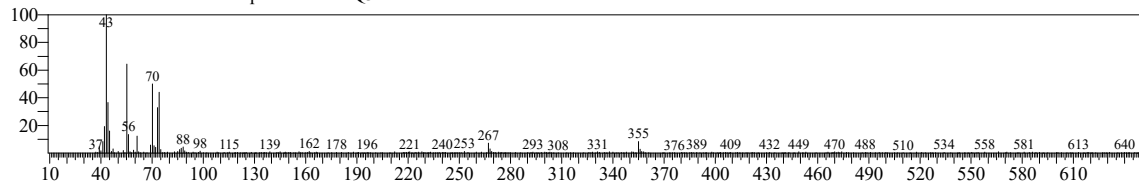

Hit#:1 Entry:6784 Library:NIST20R.lib

SI:82 Formula:C7H14O2 CAS:123-92-2 MolWeight:130 RetIndex:820

CompName:1-Butanol, 3-methyl-, acetate \$\$ Isopentyl alcohol, acetate \$\$ Acetic acid, 3-methylbutyl ester \$\$ Banana oil \$\$ Isoamyl acetate \$\$ Isoamyl etha

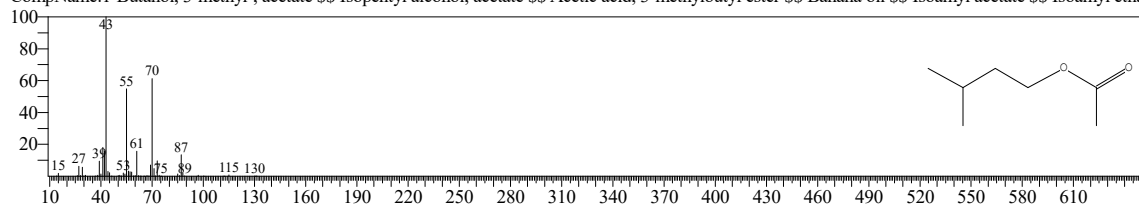

Hit#:2 Entry:8685 Library:NIST20M1.lib

SI:80 Formula:C7H14O2 CAS:628-63-7 MolWeight:130 RetIndex:884

CompName:Acetic acid, pentyl ester \$\$ n-Amyl acetate \$\$ n-Pentyl acetate \$\$ Amyl acetate \$\$ Birnenöl \$\$ Pentyl acetate \$\$ Acetic acid, amyl ester \$\$ An

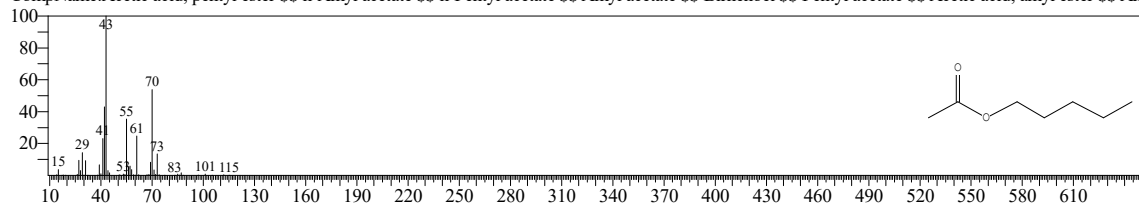

Hit#:3 Entry:6819 Library:NIST20R.lib

SI:79 Formula:C7H14O2 CAS:624-41-9 MolWeight:130 RetIndex:820

CompName:1-Butanol, 2-methyl-, acetate \$\$ 2-Methyl-1-butyl acetate \$\$ 2-Methylbutyl acetate \$\$ Acetic acid 2-methylbutyl ester \$\$ 2-Methylbutyl acetate :

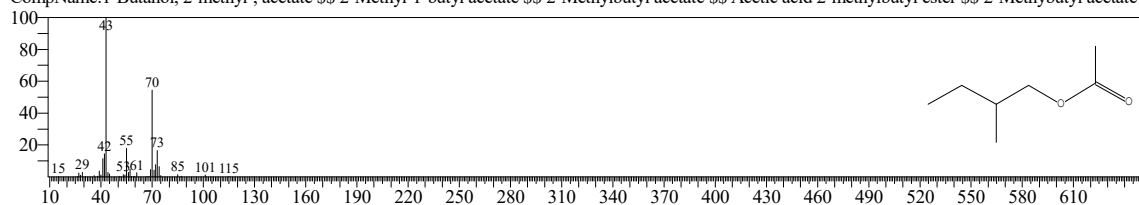

Hit#:4 Entry:32045 Library:NIST20M1.lib

SI:78 Formula:C6H10N2O4 CAS:0-00-0 MolWeight:174 RetIndex:1774

CompName:3-(N'-Acetylhydrazinecarbonyl)propanoic acid

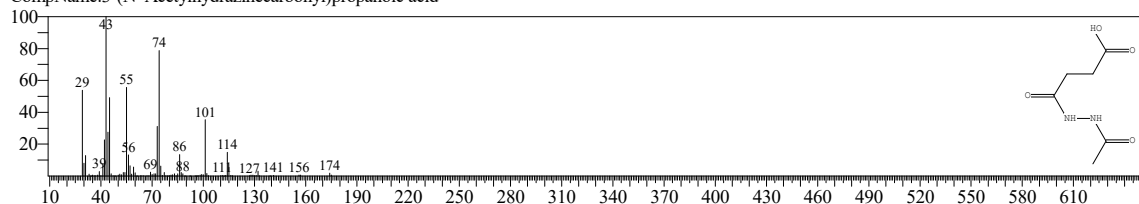

Hit#:5 Entry:1220 Library:NIST20R.lib

SI:77 Formula:C4H8O2 CAS:590-90-9 MolWeight:88 RetIndex:798

CompName:CH3C(O)CH2CH2OH \$\$ Methylolacetone \$\$ Monomethylolacetone \$\$ 3-Ketobutan-1-ol \$\$ 3-Oxo-1-butanol \$\$ 3-Oxobutanol \$\$ 4-Butanol-

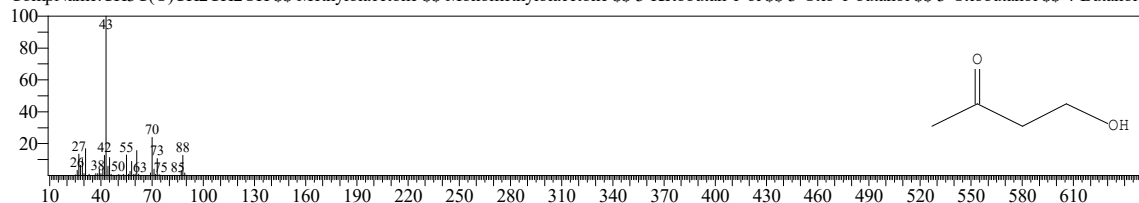

# TNAU

<< Target >>

Line#:2 R.Time:9.765(Scan#:954) MassPeaks:370

RawMode:Averaged 9.760-9.770(953-955) BasePeak:281.00(5434)

BG Mode:Calc. from Peak Group 1 - Event 1 Q3 Scan

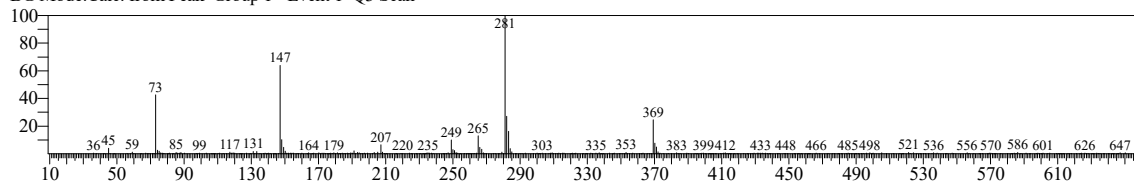

Hit#:1 Entry:40975 Library:NIST20R.lib

SI:95 Formula:C<sub>12</sub>H<sub>36</sub>O<sub>4</sub>Si<sub>5</sub> CAS:141-63-9 MolWeight:384 RetIndex:1068

CompName:Pentasiloxane, dodecamethyl- \$\$ Dodecamethylpentasiloxane \$\$ 1,1,1,3,3,5,5,7,7,9,9-Dodecamethylpentasiloxane #

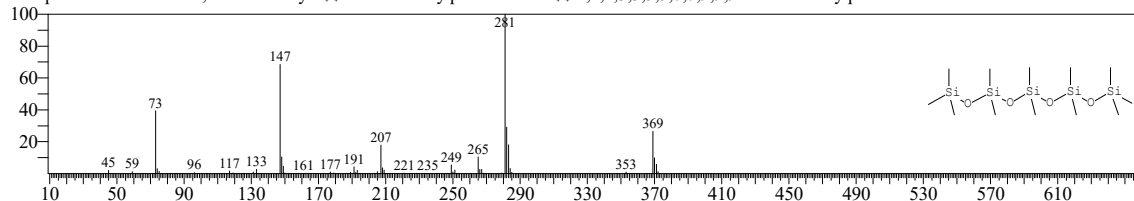

Hit#:2 Entry:249272 Library:NIST20M1.lib

SI:84 Formula:C<sub>12</sub>H<sub>36</sub>O<sub>4</sub>Si<sub>5</sub> CAS:3555-47-3 MolWeight:384 RetIndex:1068

CompName:Trisiloxane, 1,1,1,5,5,5-hexamethyl-3,3-bis[(trimethylsilyl)oxy]- \$\$ Tetrakis(trimethylsiloxy)silane \$\$ Trisiloxane, 1,1,1,5,5,5-hexamethyl-3,3-b

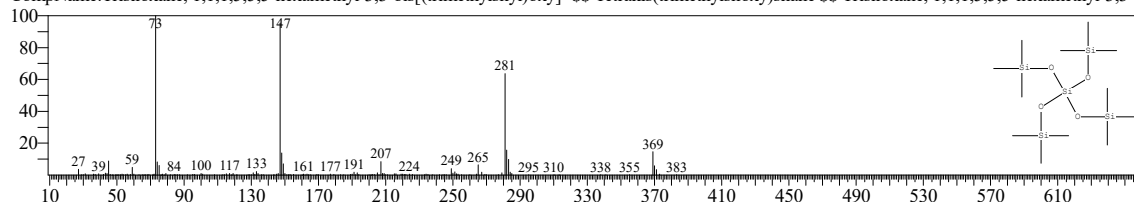

Hit#:3 Entry:27848 Library:NIST20M2.lib

SI:82 Formula:C<sub>18</sub>H<sub>48</sub>O<sub>4</sub>Si<sub>5</sub> CAS:0-00-0 MolWeight:468 RetIndex:1495

CompName:1,1,3,5,7,9-Pentasiloxane, 1,1,3,3,5,5,7,7,9,9-decamethyl-1,9-di(tert.butyl)-

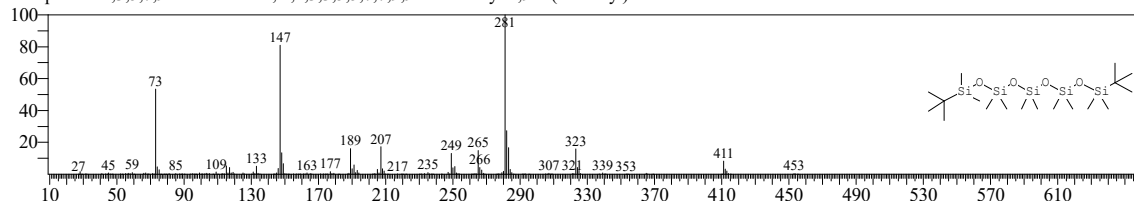

Hit#:4 Entry:249271 Library:NIST20M1.lib

SI:79 Formula:C<sub>12</sub>H<sub>36</sub>O<sub>4</sub>Si<sub>5</sub> CAS:38146-99-5 MolWeight:384 RetIndex:1068

CompName:1,1,1,3,3,5,5,7,7-Nonamethyl-3-(trimethylsiloxy)tetrasiloxane \$\$ 1,1,1,3,3,5,5,7,7-Nonamethyl-5-[(trimethylsilyl)oxy]tetrasiloxane #

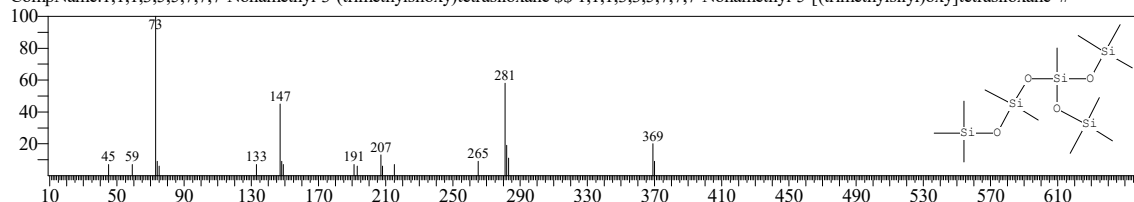

Hit#:5 Entry:158097 Library:NIST20M1.lib

SI:77 Formula:C<sub>14</sub>H<sub>24</sub>O<sub>3</sub>Si<sub>2</sub> CAS:0-00-0 MolWeight:296 RetIndex:1625

CompName:2,6-Dihydroxyacetophenone, 2TMS derivative \$\$ 2',6'-Dihydroxyacetophenone, bis(trimethylsilyl) ether

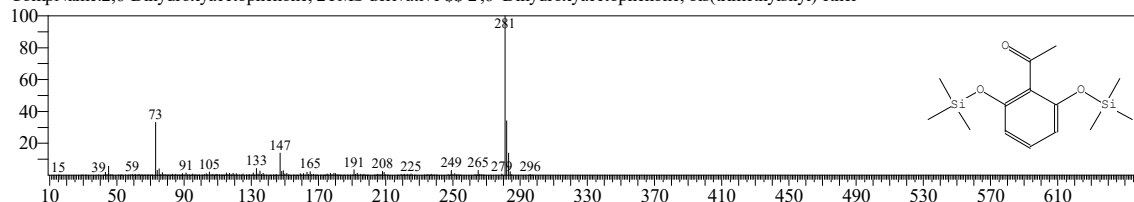

# TNAU

<< Target >>

Line#3 R.Time:12.495(Scan#:1500) MassPeaks:331

RawMode:Averaged 12.490-12.500(1499-1501) BasePeak:138.05(24056)

BG Mode:Calc. from Peak Group 1 - Event 1 Q3 Scan

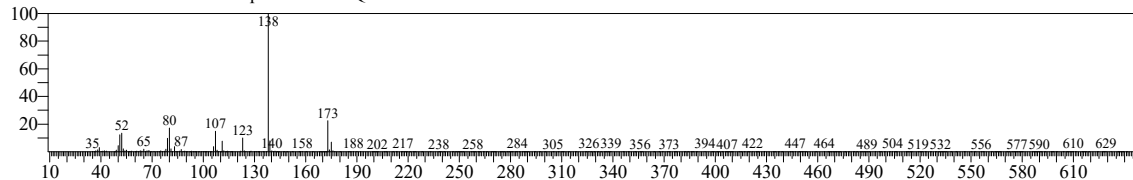

Hit#:1 Entry:8360 Library:NIST20R.lib

SI:73 Formula:C6H6N2O2 CAS:105-11-3 MolWeight:138 RetIndex:1349

CompName:2,5-Cyclohexadiene-1,4-dione, dioxime \$\$ p-Benzoquinone, dioxime \$\$ p-Quinone dioxime \$\$ p-Quinone oxime \$\$ Benzoquinone dioxime \$\$

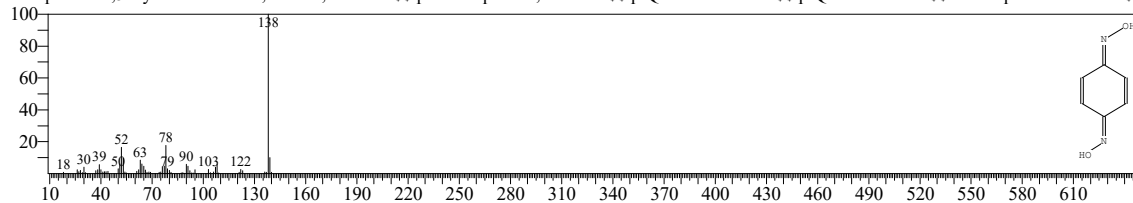

Hit#:2 Entry:11222 Library:NIST20M1.lib

SI:70 Formula:C7H10N2O CAS:3471-32-7 MolWeight:138 RetIndex:1325

CompName:Hydrazine, (4-methoxyphenyl)- \$\$ (p-Methoxyphenyl)hydrazine \$\$ 1-(4-Methoxyphenyl)hydrazine #

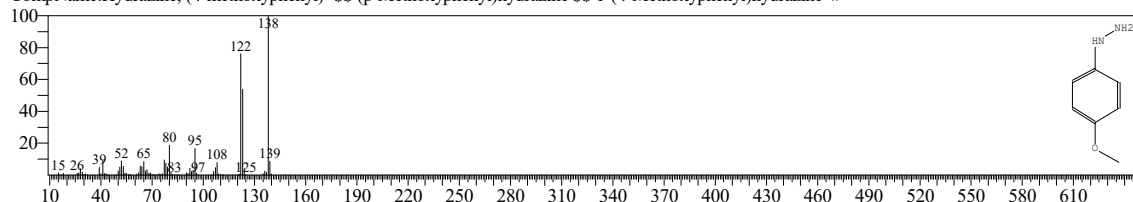

Hit#:3 Entry:25 Library:FA\_ME\_SP2560\_EI\_V3.lib

SI:35 Formula:C19H32O2 CAS:463-40-1 MolWeight:292 RetIndex:2892

CompName:Methyl linolenate ; (9Z,12Z,15Z)-octadeca-9,12,15-trienoic acid

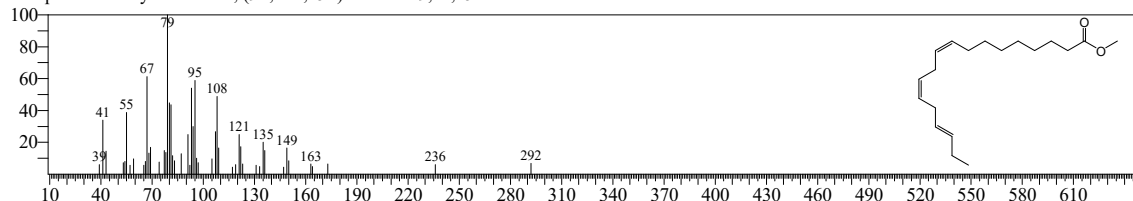

Hit#:4 Entry:21 Library:FA\_ME\_SP2560\_EI\_V3.lib

SI:34 Formula:C19H34O2 CAS:60-33-3 MolWeight:294 RetIndex:2775

CompName:Methyl linoleate ; Octadeca-9,12-dienoic acid

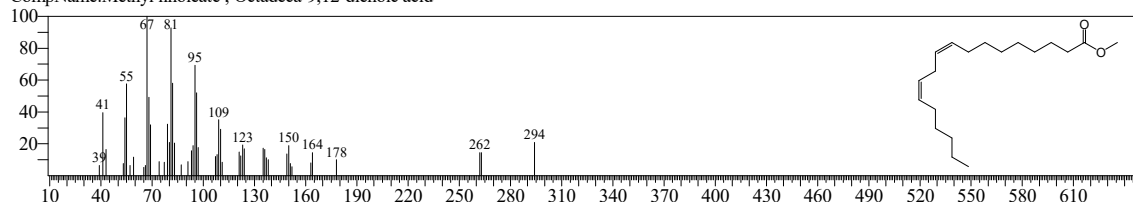

Hit#:5 Entry:34 Library:FA\_ME\_SP2560\_EI\_V3.lib

SI:34 Formula:C23H42O2 CAS:7370-49-2 MolWeight:350 RetIndex:3169

CompName:Methyl cis-13,16-Docosadienate ; (13Z,16E)-docosa-13,16-dienoic acid

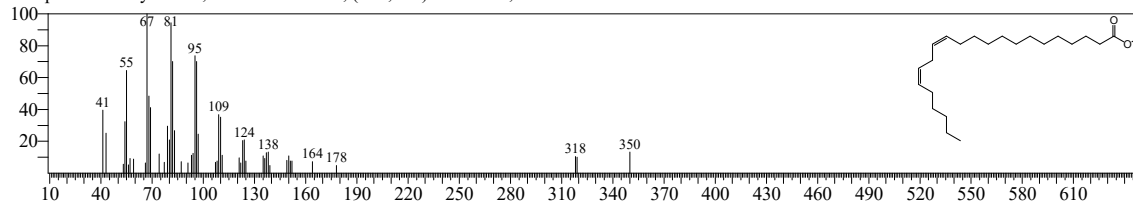

# TNAU

<< Target >>

Line#:4 R.Time:12.825(Scan#:1566) MassPeaks:290

RawMode:Averaged 12.820-12.830(1565-1567) BasePeak:138.05(33639)

BG Mode:Calc. from Peak Group 1 - Event 1 Q3 Scan

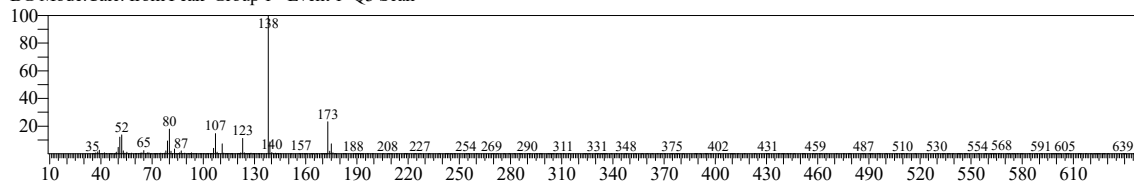

Hit#:1 Entry:8360 Library:NIST20R.lib

SI:73 Formula:C<sub>6</sub>H<sub>6</sub>N<sub>2</sub>O<sub>2</sub> CAS:105-11-3 MolWeight:138 RetIndex:1349

CompName:2,5-Cyclohexadiene-1,4-dione, dioxime \$\$ p-Benzoquinone, dioxime \$\$ p-Quinone dioxime \$\$ p-Quinone oxime \$\$ Benzoquinone dioxime \$\$

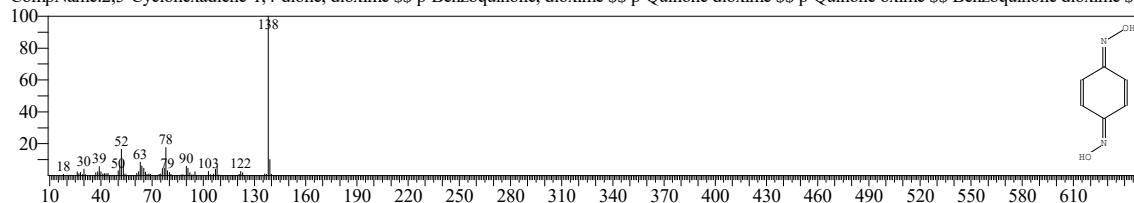

Hit#:2 Entry:11222 Library:NIST20M1.lib

SI:70 Formula:C<sub>7</sub>H<sub>10</sub>N<sub>2</sub>O CAS:3471-32-7 MolWeight:138 RetIndex:1325

CompName:Hydrazine, (4-methoxyphenyl)- \$\$ (p-Methoxyphenyl)hydrazine \$\$ 1-(4-Methoxyphenyl)hydrazine #

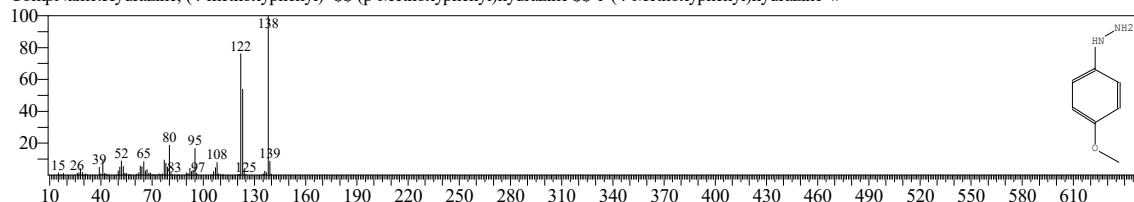

Hit#:3 Entry:25 Library:FA\_ME\_SP2560\_EI\_V3.lib

SI:33 Formula:C<sub>19</sub>H<sub>32</sub>O<sub>2</sub> CAS:463-40-1 MolWeight:292 RetIndex:2892

CompName:Methyl linolenate ; (9Z,12Z,15Z)-octadeca-9,12,15-trienoic acid

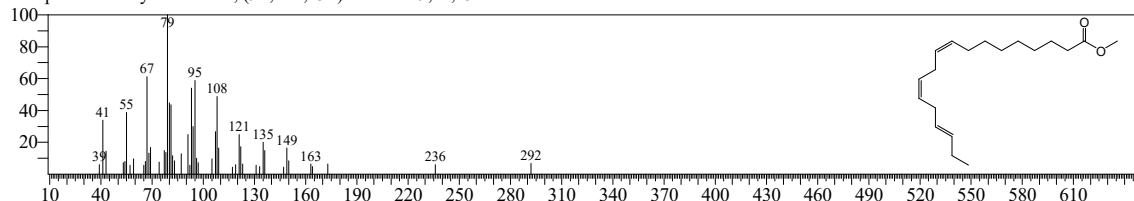

Hit#:4 Entry:21 Library:FA\_ME\_SP2560\_EI\_V3.lib

SI:32 Formula:C<sub>19</sub>H<sub>34</sub>O<sub>2</sub> CAS:60-33-3 MolWeight:294 RetIndex:2775

CompName:Methyl linoleate ; Octadeca-9,12-dienoic acid

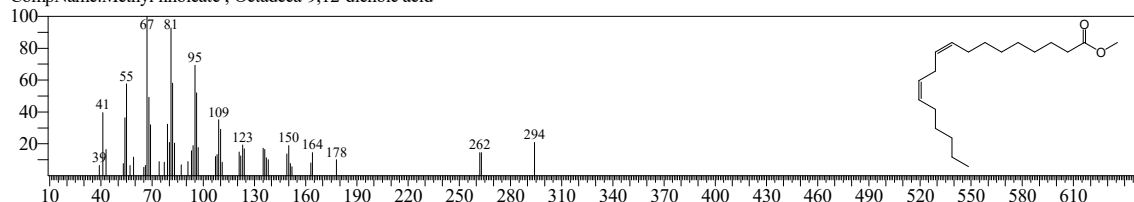

Hit#:5 Entry:137 Library:OA\_TMS\_DB5\_67min\_V3.lib

SI:32 Formula:C<sub>9</sub>H<sub>14</sub>N<sub>2</sub>OSi CAS:98-92-0 MolWeight:194 RetIndex:1486

CompName:Niacinamide-TMS ; pyridine-3-carboxamide

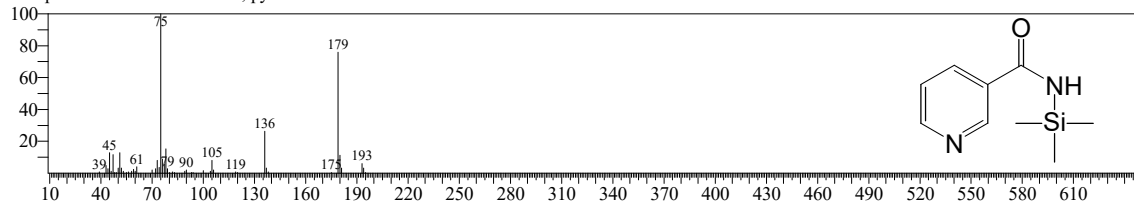

# TNAU

<< Target >>

Line#5 R.Time:13.385(Scan#:1678) MassPeaks:352

RawMode:Averaged 13.380-13.390(1677-1679) BasePeak:155.05(20855)

BG Mode:Calc. from Peak Group 1 - Event 1 Q3 Scan

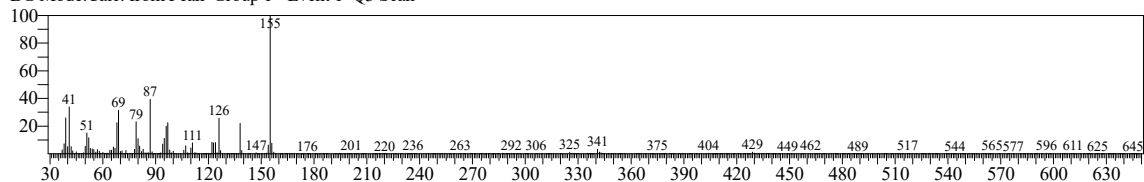

Hit#:1 Entry:34 Library:FA\_ME\_SP2560\_EI\_V3.lib

SI:51 Formula:C23H42O2 CAS:7370-49-2 MolWeight:350 RetIndex:3169

CompName:Methyl cis-13,16-Docosadienate ; (13Z,16E)-docosa-13,16-dienoic acid

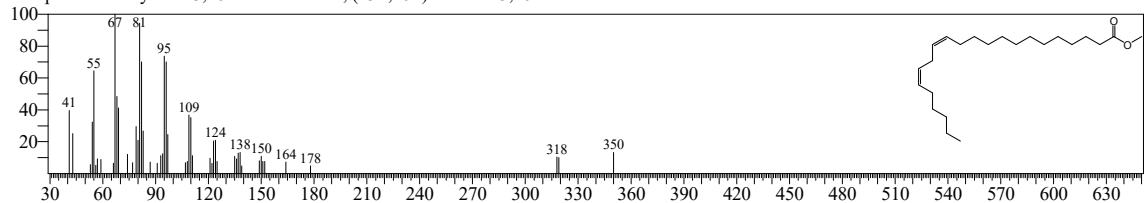

Hit#:2 Entry:11 Library:FA\_ME\_SP2560\_EI\_V3.lib

SI:50 Formula:C16H30O2 CAS:84743-29-3 MolWeight:254 RetIndex:2388

CompName:Methyl cis-10-pentadecenoate ; (Z)-pentadec-10-enoic acid

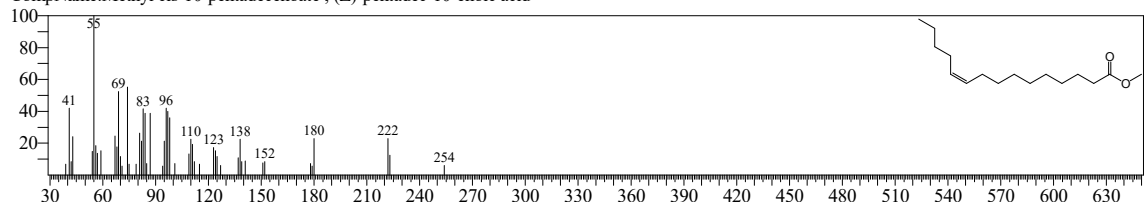

Hit#:3 Entry:21 Library:FA\_ME\_SP2560\_EI\_V3.lib

SI:50 Formula:C19H34O2 CAS:60-33-3 MolWeight:294 RetIndex:2775

CompName:Methyl linoleate ; Octadeca-9,12-dienoic acid

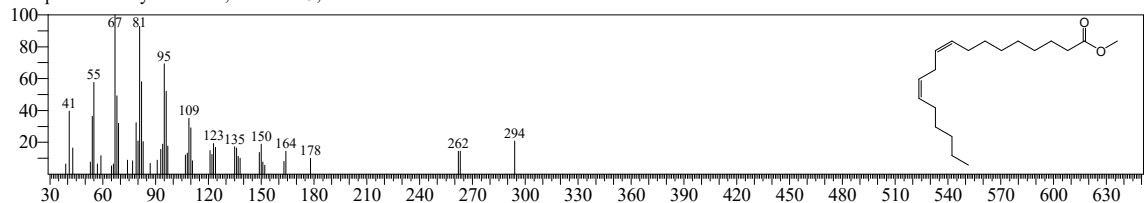

Hit#:4 Entry:20 Library:FA\_ME\_SP2560\_EI\_V3.lib

SI:49 Formula:C19H34O2 CAS:506-21-8 MolWeight:294 RetIndex:2727

CompName:Methyl linoleate ; (9E,12E)-octadeca-9,12-dienoic acid

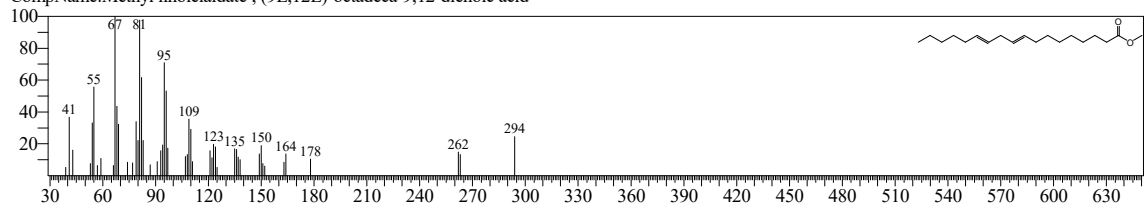

Hit#:5 Entry:27 Library:FA\_ME\_SP2560\_EI\_V3.lib

SI:49 Formula:C21H38O2 CAS:2091-39-6 MolWeight:322 RetIndex:2973

CompName:Methyl cis-11,14-Icosadienoate ; ; Icosa-11,14-dienoic acid

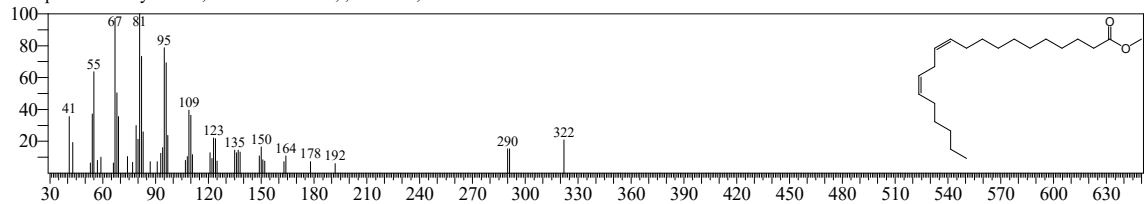

# TNAU

<< Target >>

Line#:6 R.Time:13.570(Scan#:1715) MassPeaks:248

RawMode:Averaged 13.565-13.575(1714-1716) BasePeak:155.05(15923)

BG Mode:Calc. from Peak Group 1 - Event 1 Q3 Scan

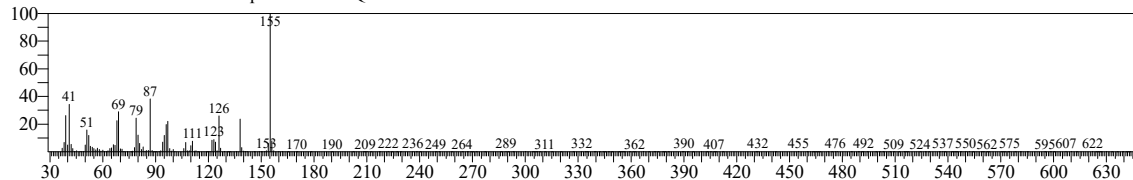

Hit#:1 Entry:34 Library:FA\_ME\_SP2560\_EI\_V3.lib

SI:53 Formula:C23H42O2 CAS:7370-49-2 MolWeight:350 RetIndex:3169

CompName:Methyl cis-13,16-Docosadienate ; (13Z,16E)-docosa-13,16-dienoic acid

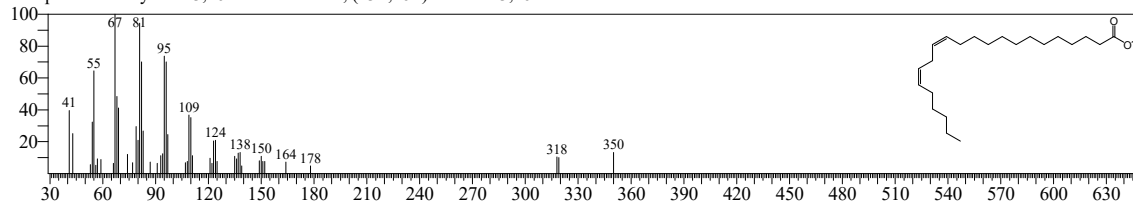

Hit#:2 Entry:21 Library:FA\_ME\_SP2560\_EI\_V3.lib

SI:52 Formula:C19H34O2 CAS:60-33-3 MolWeight:294 RetIndex:2775

CompName:Methyl linoleate ; Octadeca-9,12-dienoic acid

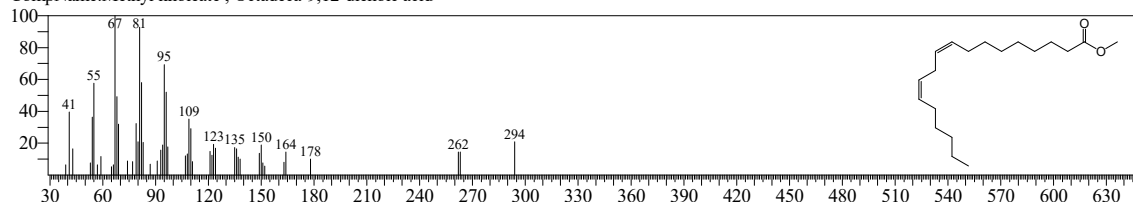

Hit#:3 Entry:20 Library:FA\_ME\_SP2560\_EI\_V3.lib

SI:51 Formula:C19H34O2 CAS:506-21-8 MolWeight:294 RetIndex:2727

CompName:Methyl linolelaidate ; (9E,12E)-octadeca-9,12-dienoic acid

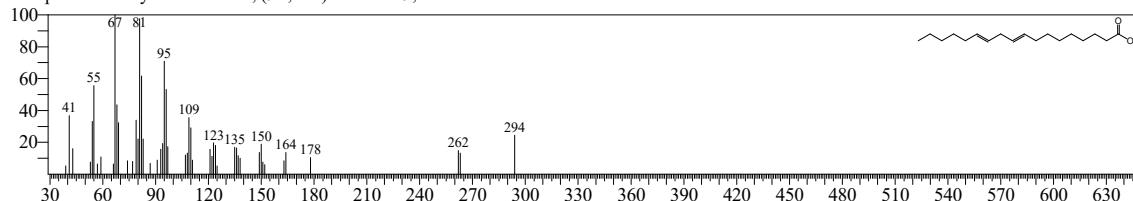

Hit#:4 Entry:11 Library:FA\_ME\_SP2560\_EI\_V3.lib

SI:51 Formula:C16H30O2 CAS:84743-29-3 MolWeight:254 RetIndex:2388

CompName:Methyl cis-10-pentadecenoate ; (Z)-pentadec-10-enoic acid

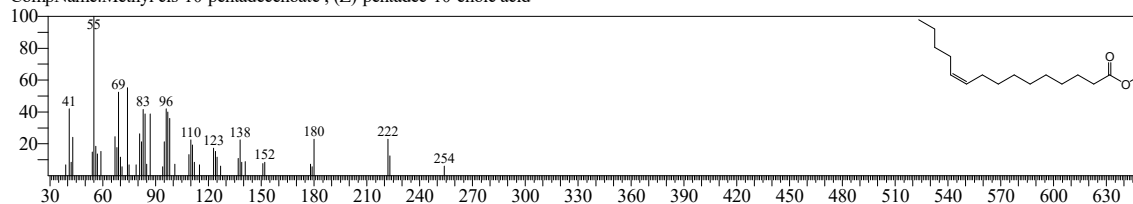

Hit#:5 Entry:27 Library:FA\_ME\_SP2560\_EI\_V3.lib

SI:51 Formula:C21H38O2 CAS:2091-39-6 MolWeight:322 RetIndex:2973

CompName:Methyl cis-11,14-Icosadienoate ; ; Icosa-11,14-dienoic acid

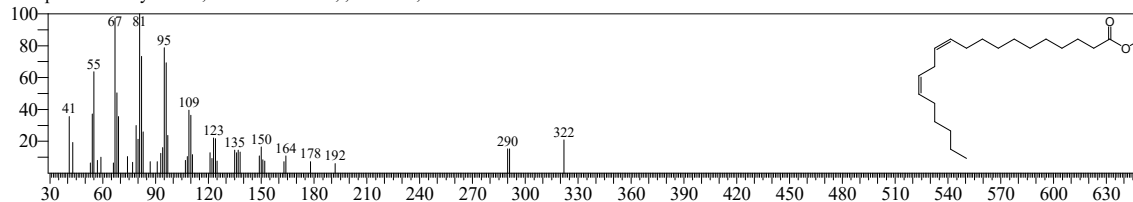

# TNAU

<< Target >>

Line#:7 R.Time:18.090(Scan#:2619) MassPeaks:365

RawMode:Averaged 18.085-18.095(2618-2620) BasePeak:60.05(2255)

BG Mode:Calc. from Peak Group 1 - Event 1 Q3 Scan

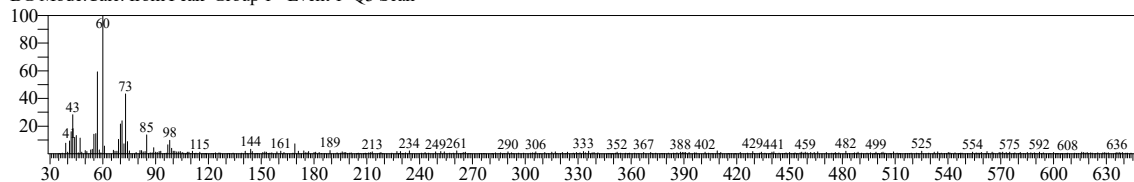

Hit#:1 Entry:13905 Library:NIST20R.lib

SI:88 Formula:C6H10O5 CAS:498-07-7 MolWeight:162 RetIndex:1404

CompName:.beta.-D-Glucopyranose, 1,6-anhydro- \$\$ Anhydro-d-mannosan \$\$ Levoglucosan \$\$ 1,6-Anhydro-.beta.-D-glucopyranose \$\$ 1,6-Anhydro-beta-

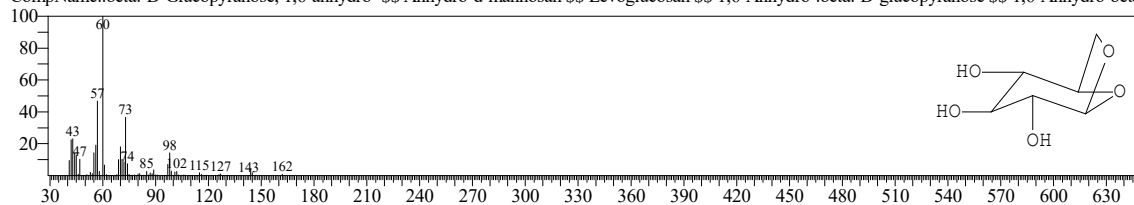

Hit#:2 Entry:23812 Library:NIST20M1.lib

SI:87 Formula:C6H10O5 CAS:0-00-0 MolWeight:162 RetIndex:1404

CompName:1,6-Anhydro-.beta.-d-talopyranose

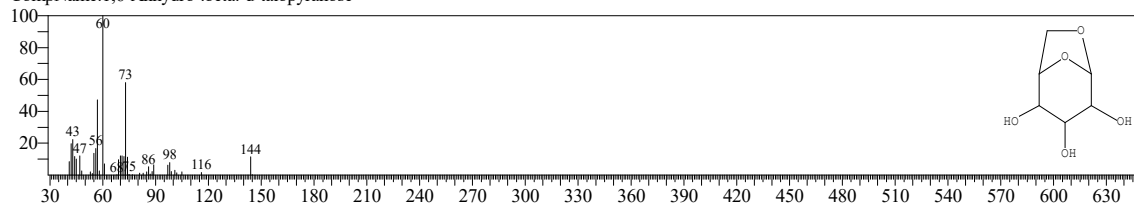

Hit#:3 Entry:23808 Library:NIST20M1.lib

SI:87 Formula:C6H10O5 CAS:0-00-0 MolWeight:162 RetIndex:1400

CompName:3,4-Altrosan \$\$ 3,4-Anhydrohexopyranose #

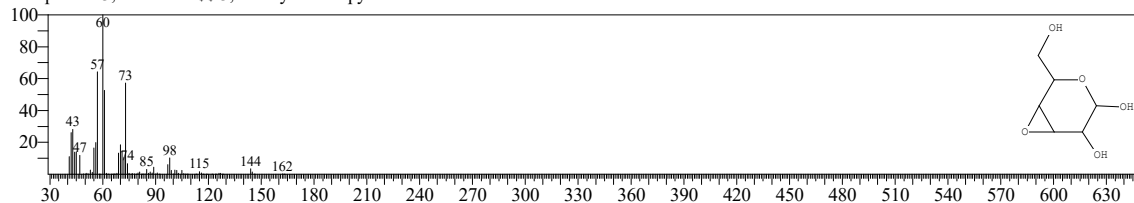

Hit#:4 Entry:36240 Library:NIST20M1.lib

SI:87 Formula:C6H12O6 CAS:2595-97-3 MolWeight:180 RetIndex:1698

CompName:D-Allose \$\$ .beta.-D-Allose \$\$ Hexose #

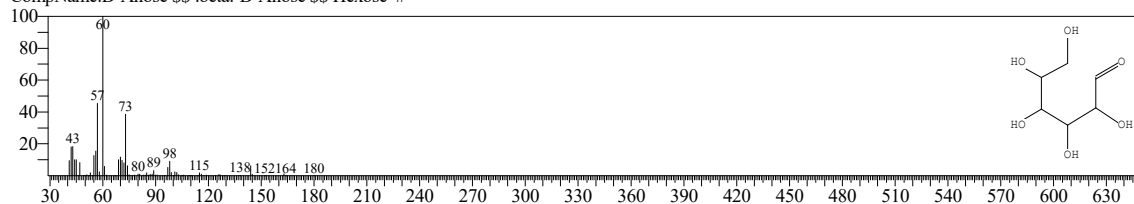

Hit#:5 Entry:9697 Library:NIST20M1.lib

SI:82 Formula:C5H10O4 CAS:14003-71-5 MolWeight:134 RetIndex:1352

CompName:1,2,3,4-Cyclopentanetetrol, (1.alpha.,2.beta.,3.beta.,4.alpha.)- \$\$ 1,2,3,4-Cyclopentanetetrol, stereoisomer \$\$ 1,2,3,4-Cyclopentanetetrol #

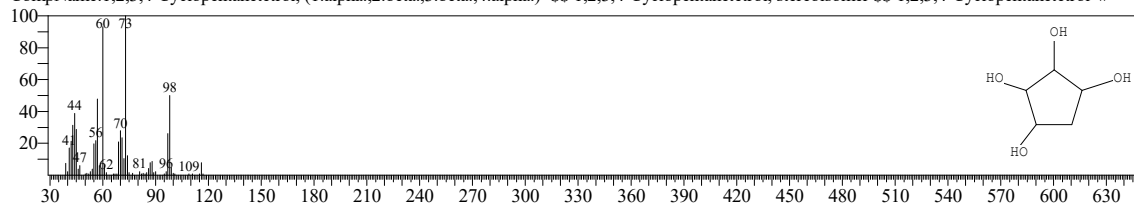



# TNAU

<< Target >>

Line#8 R.Time:19.195(Scan#:2840) MassPeaks:369

RawMode:Averaged 19.190-19.200(2839-2841) BasePeak:263.15(3577)

BG Mode:Calc. from Peak Group 1 - Event 1 Q3 Scan

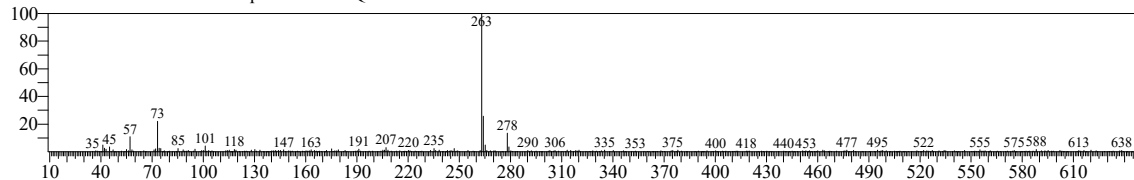

Hit#:1 Entry:33874 Library:NIST20R.lib

SI:84 Formula:C<sub>17</sub>H<sub>30</sub>OSi CAS:53925-65-8 MolWeight:278 RetIndex:1632

CompName:2,4-Di-tert-butylphenoxytrimethylsilane \$ \$ Benzene, 2,4-bis(1,1-dimethylethyl)-1-[(trimethylsilyl)oxy]- \$ \$ Silane, [2,4-bis(1,1-dimethylethyl)ph

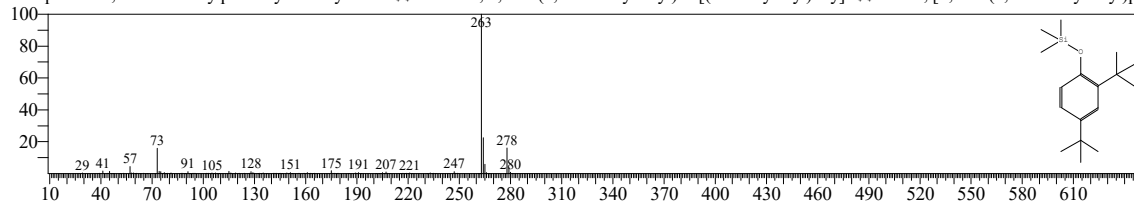

Hit#:2 Entry:136557 Library:NIST20M1.lib

SI:78 Formula:C<sub>12</sub>H<sub>22</sub>N<sub>4</sub>Si<sub>2</sub> CAS:0-00-0 MolWeight:278 RetIndex:1703

CompName:3-Deazaadenine, 2TMS \$ \$ 3-Deazaadenine, N,N'-bis-TMS \$ \$ 1H-Imidazo[4,5-c]pyridin-4-amine, N,N'-bis-TMS

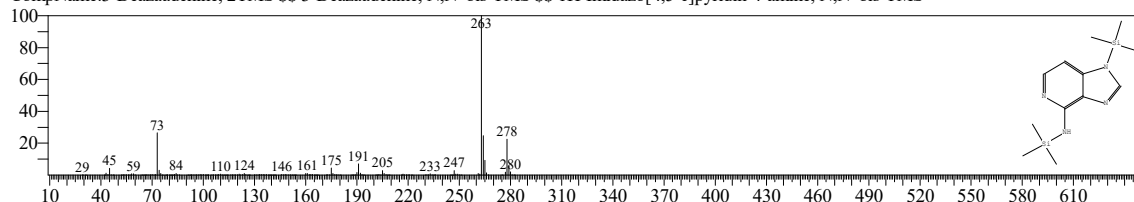

Hit#:3 Entry:33871 Library:NIST20R.lib

SI:78 Formula:C<sub>17</sub>H<sub>30</sub>OSi CAS:10416-73-6 MolWeight:278 RetIndex:1632

CompName:2,6-Bis(tert-butyl)phenol, TMS derivative \$ \$ Trimethyl(2,6 di-tert-butylphenoxy)silane \$ \$ (2,6-Di-tert-butylphenoxy)(trimethyl)silane #

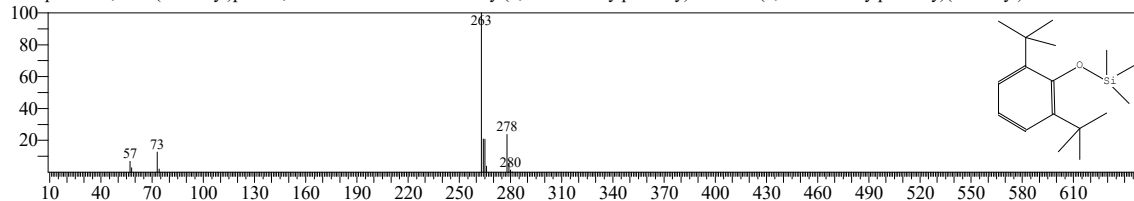

Hit#:4 Entry:136556 Library:NIST20M1.lib

SI:75 Formula:C<sub>12</sub>H<sub>22</sub>N<sub>4</sub>Si<sub>2</sub> CAS:0-00-0 MolWeight:278 RetIndex:1606

CompName:1H,1'H-2,2'-Biimidazole, 2TMS \$ \$ 1H,1'H-2,2'-Biimidazole, N,N'-bis-TMS \$ \$ 1H,1'H-[2,2']Biimidazolyl, 2TMS \$ \$ 2,2'-Bi-1H-imidazole, 2TMS

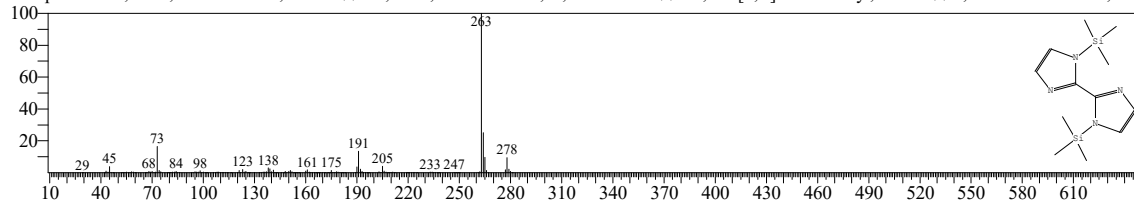

Hit#:5 Entry:137020 Library:NIST20M1.lib

SI:73 Formula:C<sub>15</sub>H<sub>22</sub>O<sub>3</sub>Si CAS:0-00-0 MolWeight:278 RetIndex:1736

CompName:6-Methoxy-2,2-dimethyl-2,3-dihydro-4H-chromen-4-one, TMS \$ \$ 6-Methoxy-2,2-dimethyl-chroman-4-one, O-trimethylsilyl- \$ \$ 4H-1-Benzopy

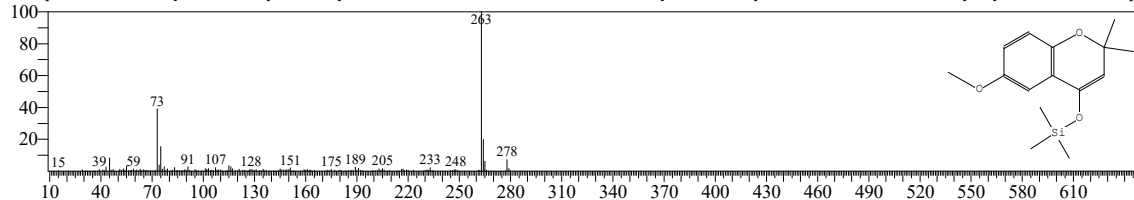

# TNAU

<< Target >>

Line#9 R.Time:28.295(Scan#:4660) MassPeaks:391

RawMode:Averaged 28.290-28.300(4659-4661) BasePeak:73.00(6374)

BG Mode:Calc. from Peak Group 1 - Event 1 Q3 Scan

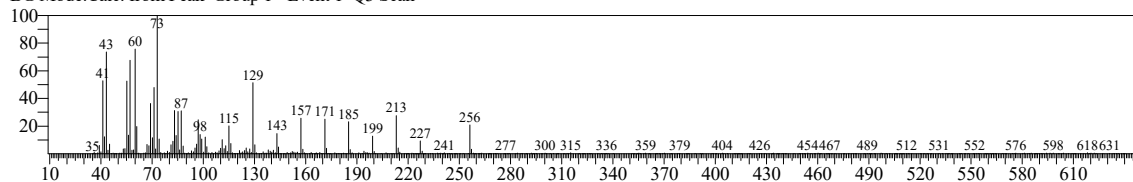

Hit#:1 Entry:31600 Library:NIST20R.lib

SI:95 Formula:C16H32O2 CAS:57-10-3 MolWeight:256 RetIndex:1968

CompName:n-Hexadecanoic acid \$ Hexadecanoic acid \$ n-Hexadecanoic acid \$ Palmitic acid \$ Pentadecanecarboxylic acid \$ 1-Pentadecanecarboxylic acid

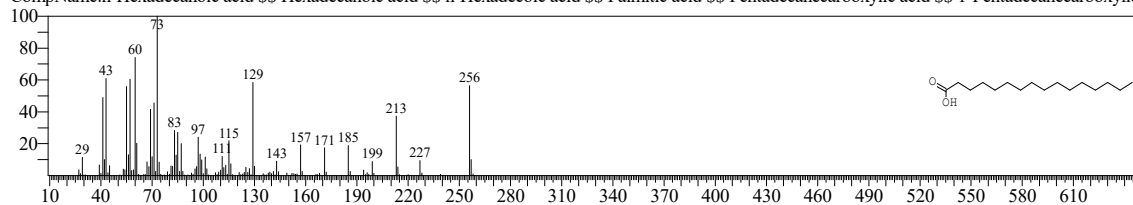

Hit#:2 Entry:29890 Library:NIST20R.lib

SI:91 Formula:C15H30O2 CAS:1002-84-2 MolWeight:242 RetIndex:1869

CompName:Pentadecanoic acid \$ Pentadecylic acid \$ n-Pentadecanoic acid \$ n-Pentadecylic acid

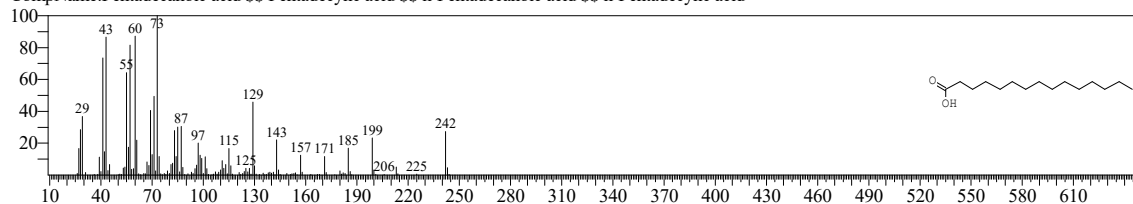

Hit#:3 Entry:44286 Library:NIST20M2.lib

SI:91 Formula:C38H68O8 CAS:28474-90-0 MolWeight:652 RetIndex:4765

CompName:l-(+)-Ascorbic acid 2,6-dihexadecanoate

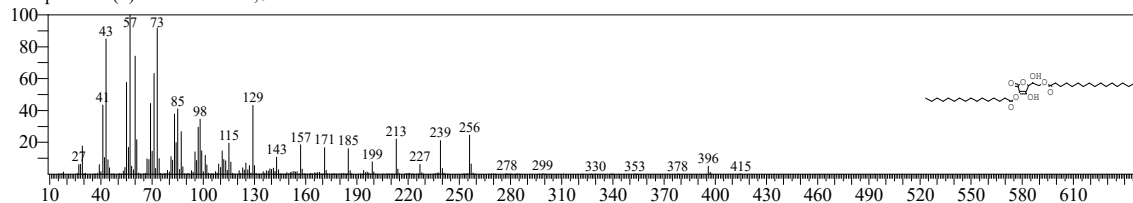

Hit#:4 Entry:25643 Library:NIST20R.lib

SI:90 Formula:C13H26O2 CAS:638-53-9 MolWeight:214 RetIndex:1670

CompName:Tridecanoic acid \$ n-Tridecanoic acid \$ n-Tridecoic acid \$ Tridecylic acid

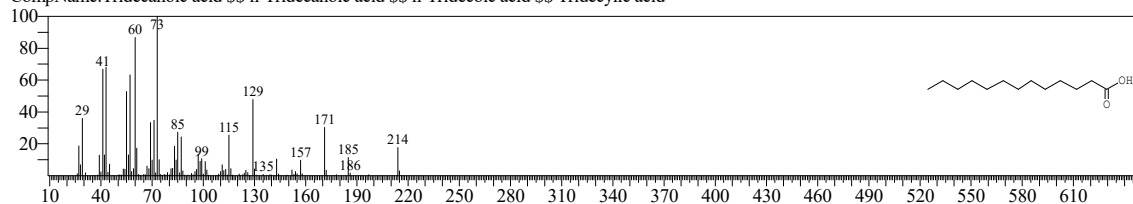

Hit#:5 Entry:144781 Library:NIST20M1.lib

SI:89 Formula:C18H36O2 CAS:57-11-4 MolWeight:284 RetIndex:2167

CompName:Octadecanoic acid \$ Stearic acid \$ n-Octadecanoic acid \$ Humko Industriene R \$ Hydrofol Acid 150 \$ Hystrene S-97 \$ Hystrene T-70 \$

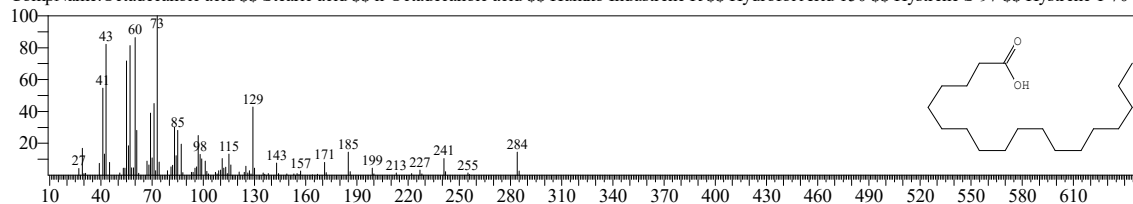

# TNAU

<< Target >>

Line#:10 R.Time:31.470(Scan#:5295) MassPeaks:381

RawMode:Averaged 31.465-31.475(5294-5296) BasePeak:67.05(3381)

BG Mode:Calc. from Peak Group 1 - Event 1 Q3 Scan

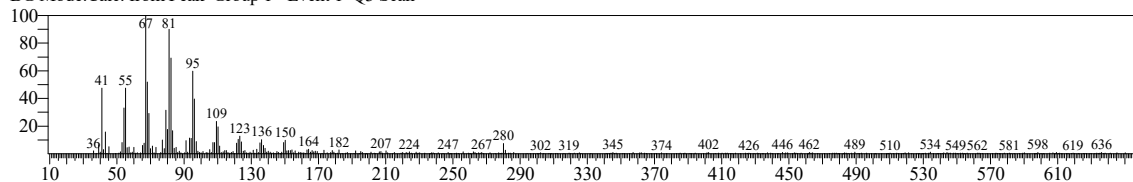

Hit#:1 Entry:34035 Library:NIST20R.lib

SI:95 Formula:C18H32O2 CAS:60-33-3 MolWeight:280 RetIndex:2183

CompName:9,12-Octadecadienoic acid (Z,Z)- \$\$ cis-9,cis-12-Octadecadienoic acid \$\$ cis,cis-Linoleic acid \$\$ Grape seed oil \$\$ Linoleic acid \$

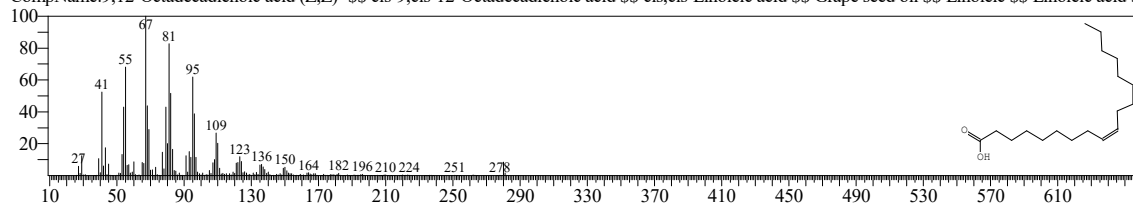

Hit#:2 Entry:139646 Library:NIST20M1.lib

SI:94 Formula:C18H32O2 CAS:2420-56-6 MolWeight:280 RetIndex:2183

CompName:10E,12Z-Octadecadienoic acid

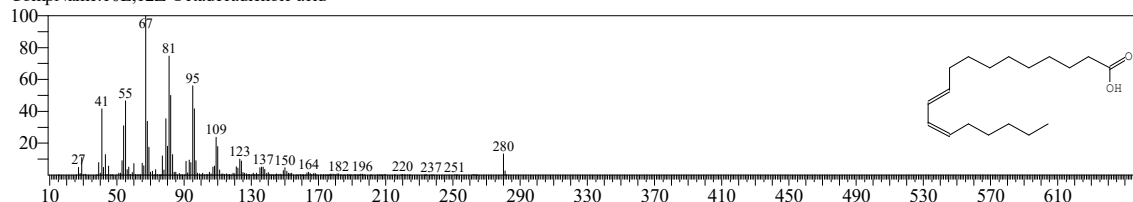

Hit#:3 Entry:139651 Library:NIST20M1.lib

SI:94 Formula:C18H32O2 CAS:544-71-8 MolWeight:280 RetIndex:2183

CompName:(9E,11E)-Octadecadienoic acid

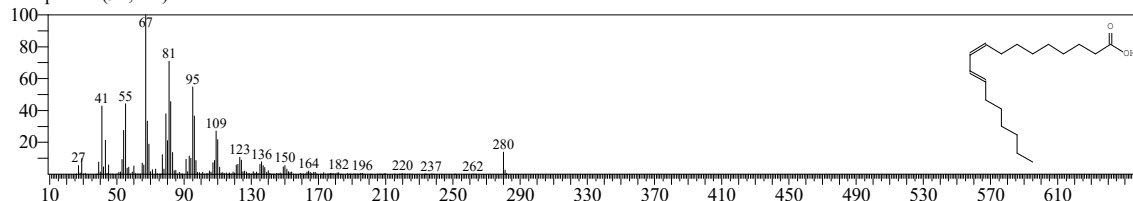

Hit#:4 Entry:139661 Library:NIST20M1.lib

SI:94 Formula:C18H32O2 CAS:506-21-8 MolWeight:280 RetIndex:2183

CompName:Linoelaidic acid

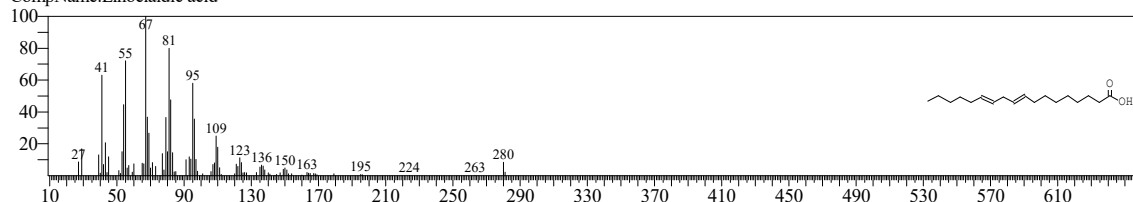

Hit#:5 Entry:173215 Library:NIST20M1.lib

SI:93 Formula:C20H36O2 CAS:2091-39-6 MolWeight:308 RetIndex:2382

CompName:11,14-Eicosadienoic acid

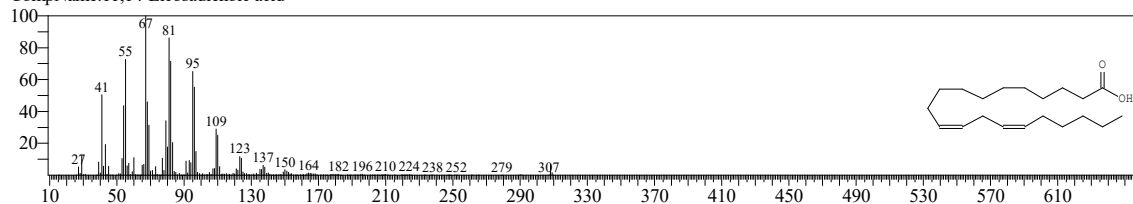

# TNAU

<< Target >>

Line#:11 R.Time:31.585(Scan#:5318) MassPeaks:401

RawMode:Averaged 31.580-31.590(5317-5319) BasePeak:55.05(1114)

BG Mode:Calc. from Peak Group 1 - Event 1 Q3 Scan

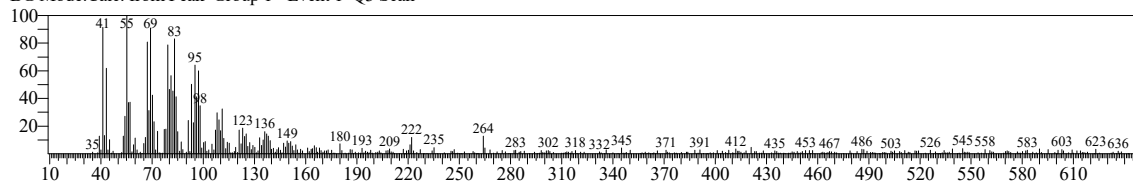

Hit#:1 Entry:92244 Library:NIST20M1.lib

SI:86 Formula:C16H30O CAS:56219-04-6 MolWeight:238 RetIndex:1808

CompName:cis-9-Hexadecenal \$\$ 9-Hexadecenal, (Z)- \$\$ (Z)-9-Hexadecenal \$\$ Z-9-Hexadecenal \$\$ (9Z)-9-Hexadecenal #

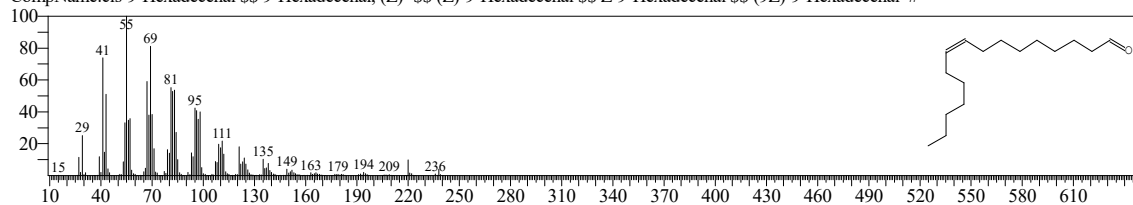

Hit#:2 Entry:156549 Library:NIST20M1.lib

SI:86 Formula:C19H34O2 CAS:0-00-0 MolWeight:294 RetIndex:2241

CompName:E,E,Z-1,3,12-Nonadecatriene-5,14-diol \$\$ (3E,12Z)-1,3,12-Nonadecatriene-5,14-diol #

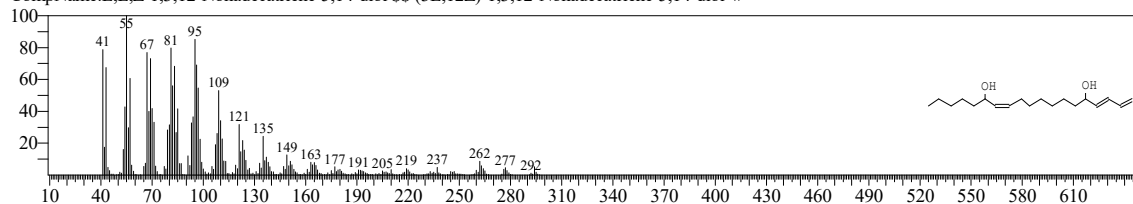

Hit#:3 Entry:92246 Library:NIST20M1.lib

SI:86 Formula:C16H30O CAS:822-21-9 MolWeight:238 RetIndex:1872

CompName:7-Hexadecyn-1-ol

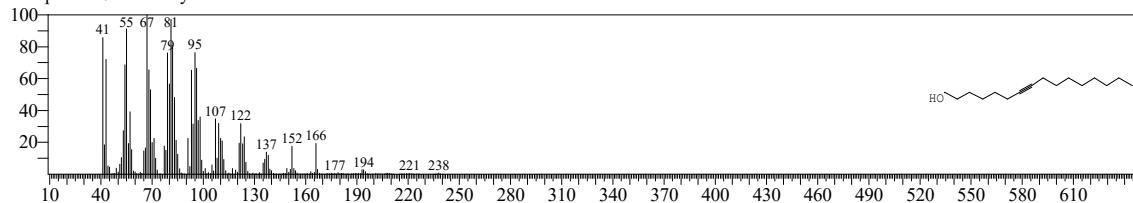

Hit#:4 Entry:31321 Library:NIST20M1.lib

SI:85 Formula:C10H20O2 CAS:0-00-0 MolWeight:172 RetIndex:1510

CompName:2-(4-Hydroxybutyl)cyclohexanol

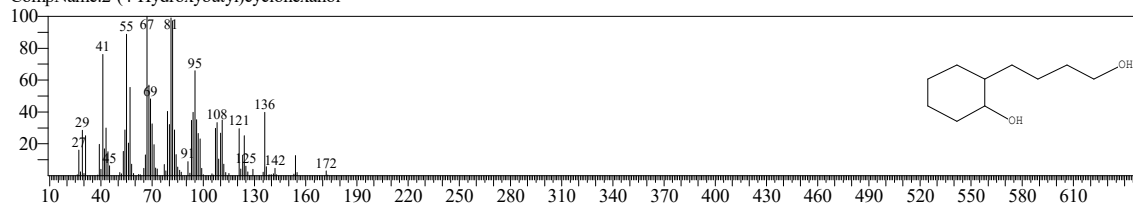

Hit#:5 Entry:123421 Library:NIST20M1.lib

SI:85 Formula:C18H34O CAS:2423-10-1 MolWeight:266 RetIndex:2007

CompName:9-Octadecenal, (Z)- \$\$ Olealdehyde \$\$ cis-9-Octadecenal \$\$ Oleylaldehyde \$\$ Z-9-Octadecenal \$\$ (9Z)-9-Octadecenal #

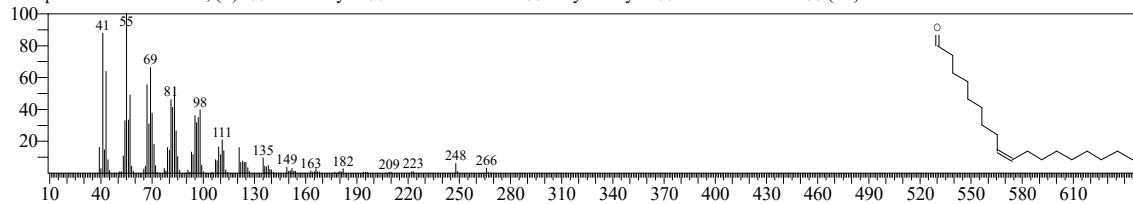

# TNAU

<< Target >>

Line#:12 R.Time:32.030(Scan#:5407) MassPeaks:380

RawMode:Averaged 32.025-32.035(5406-5408) BasePeak:73.05(2009)

BG Mode:Calc. from Peak Group 1 - Event 1 Q3 Scan

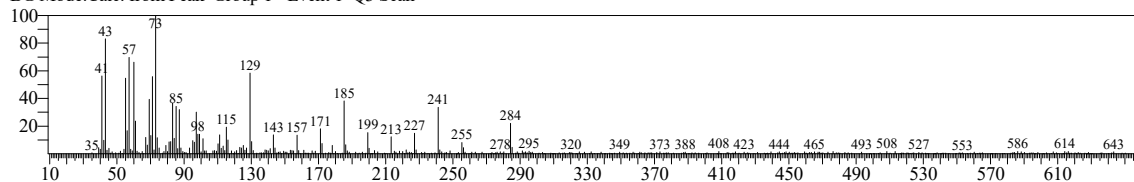

Hit#:1 Entry:34463 Library:NIST20R.lib

SI:92 Formula:C18H36O2 CAS:57-11-4 MolWeight:284 RetIndex:2167

CompName:Octadecanoic acid \$\$ Stearic acid \$\$ n-Octadecanoic acid \$\$ Humko Industriene R \$\$ Hydrofol Acid 150 \$\$ Hystrene S-97 \$\$ Hystrene T-70 \$

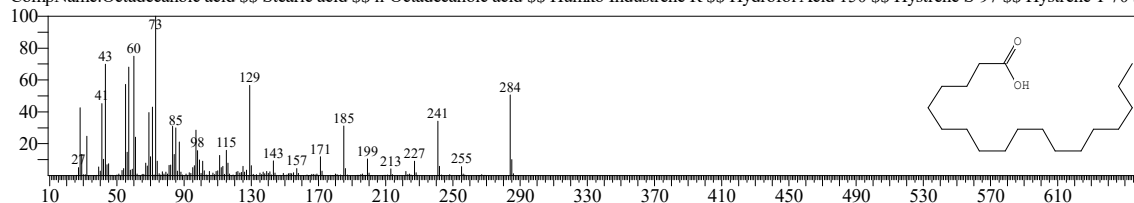

Hit#:2 Entry:29890 Library:NIST20R.lib

SI:88 Formula:C15H30O2 CAS:1002-84-2 MolWeight:242 RetIndex:1869

CompName:Pentadecanoic acid \$\$ Pentadecylic acid \$\$ n-Pentadecanoic acid \$\$ n-Pentadecylic acid

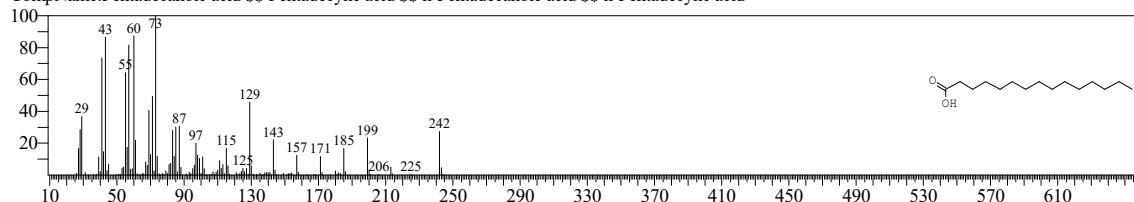

Hit#:3 Entry:44286 Library:NIST20M2.lib

SI:88 Formula:C38H68O8 CAS:28474-90-0 MolWeight:652 RetIndex:4765

CompName:l-(+)-Ascorbic acid 2,6-dihexadecanoate

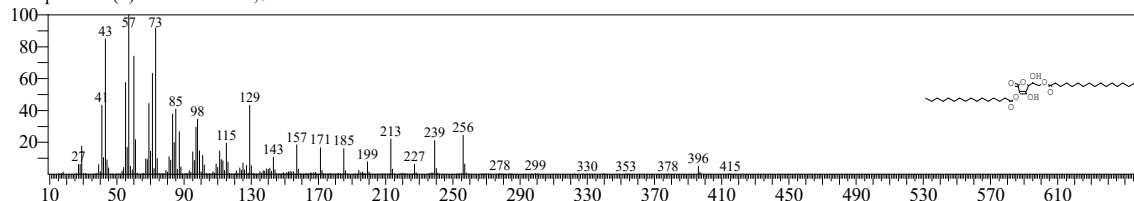

Hit#:4 Entry:31600 Library:NIST20R.lib

SI:87 Formula:C16H32O2 CAS:57-10-3 MolWeight:256 RetIndex:1968

CompName:n-Hexadecanoic acid \$\$ Hexadecanoic acid \$\$ n-Hexadecic acid \$\$ Palmitic acid \$\$ Pentadecanecarboxylic acid \$\$ 1-Pentadecanecarboxylic

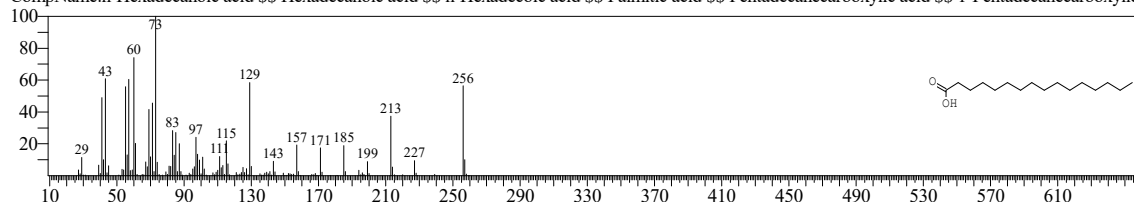

Hit#:5 Entry:178153 Library:NIST20M1.lib

SI:87 Formula:C20H40O2 CAS:506-30-9 MolWeight:312 RetIndex:2366

CompName:Eicosanoic acid \$\$ Arachic acid \$\$ Arachidic acid \$\$ Icosanoic acid \$\$ n-Eicosanoic acid \$\$ Arachidic acid (synthetic)

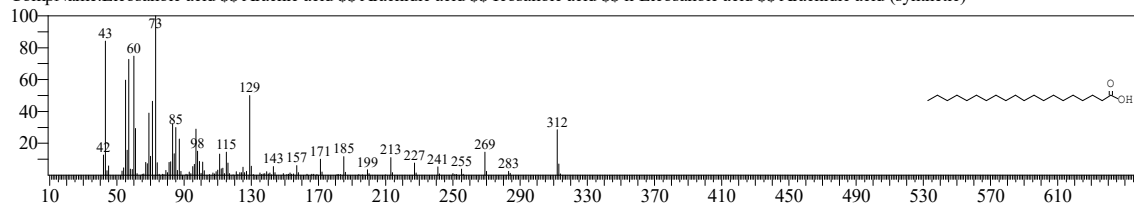

# TNAU

<< Target >>

Line#:13 R.Time:39.070(Scan#:6815) MassPeaks:380

RawMode:Averaged 39.065-39.075(6814-6816) BasePeak:355.00(1069)

BG Mode:Calc. from Peak Group 1 - Event 1 Q3 Scan

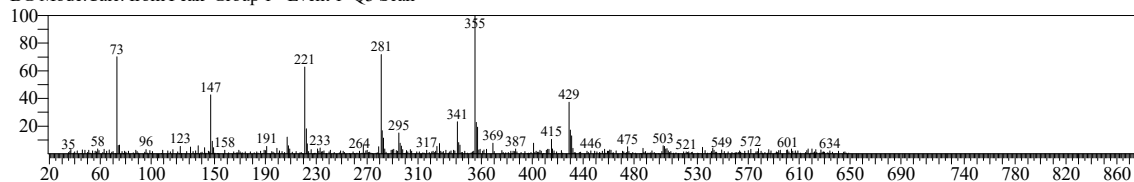

Hit#:1 Entry:46368 Library:NIST20M2.lib

SI:81 Formula:C<sub>24</sub>H<sub>72</sub>O<sub>12</sub>Si<sub>12</sub> CAS:18919-94-3 MolWeight:888 RetIndex:2480

CompName:Tetracosamethyl-cyclododecasiloxane \$\$ 2,2,4,4,6,6,8,8,10,10,12,12,14,14,16,16,18,18,20,20,22,22,24,24-Tetracosamethylcyclododecasiloxane

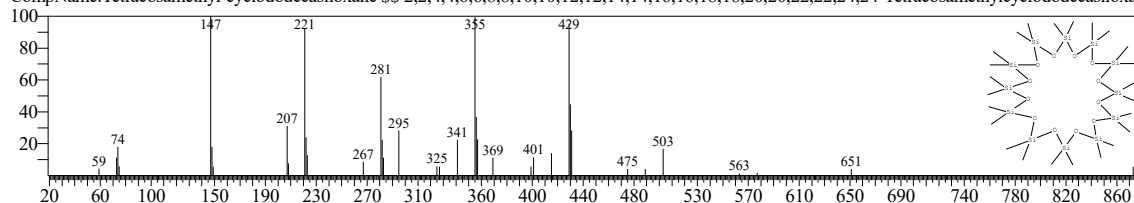

Hit#:2 Entry:45685 Library:NIST20M2.lib

SI:78 Formula:C<sub>20</sub>H<sub>60</sub>O<sub>10</sub>Si<sub>10</sub> CAS:18772-36-6 MolWeight:740 RetIndex:2067

CompName:Cyclododecasiloxane, eicosamethyl- \$\$ 2,2,4,4,6,6,8,8,10,10,12,12,14,14,16,16,18,18,20,20-Icosamethylcyclododecasiloxane # \$\$ Eicosamethyl-cy

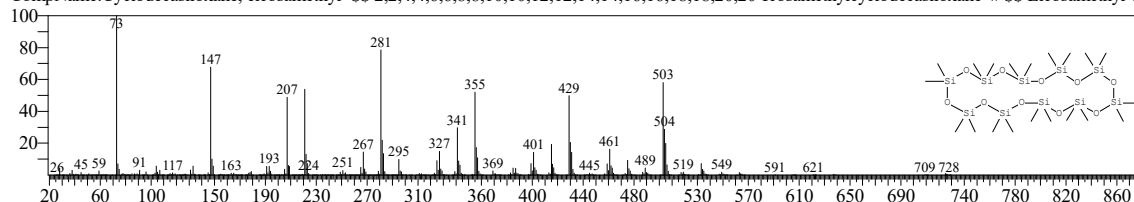

Hit#:3 Entry:44570 Library:NIST20M2.lib

SI:78 Formula:C<sub>18</sub>H<sub>54</sub>O<sub>9</sub>Si<sub>9</sub> CAS:556-71-8 MolWeight:666 RetIndex:1860

CompName:Cyclononasiloxane, octadecamethyl- \$\$ Octadecamethyl-cyclononasiloxane \$\$ 2,2,4,4,6,6,8,8,10,10,12,12,14,14,16,16,18,18-Octadecamethylcy

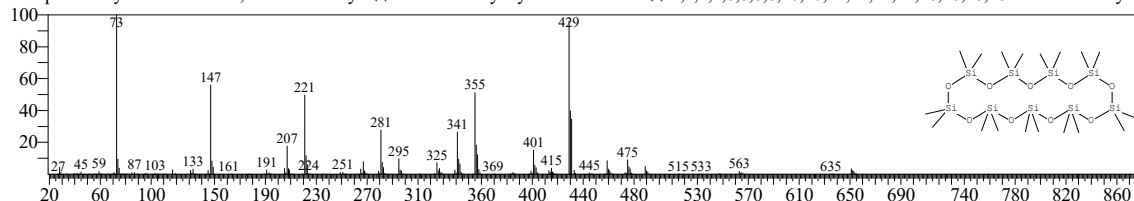

Hit#:4 Entry:43312 Library:NIST20R.lib

SI:75 Formula:C<sub>16</sub>H<sub>48</sub>O<sub>6</sub>Si<sub>7</sub> CAS:541-01-5 MolWeight:532 RetIndex:1437

CompName:Heptasiloxane, hexadecamethyl- \$\$ Hexadecamethylheptasiloxane \$\$ 1,1,1,3,3,5,5,7,7,9,9,11,11,13,13,13-Hexadecamethylheptasiloxane #

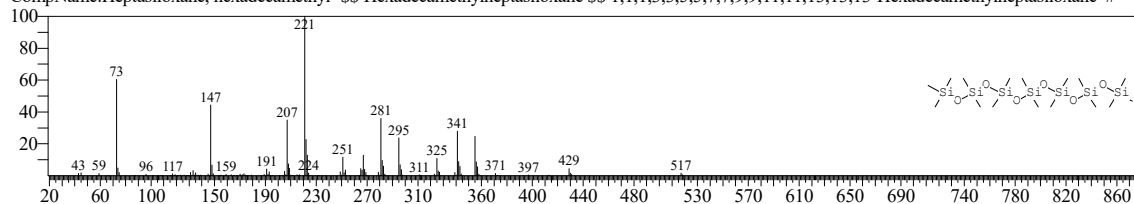

Hit#:5 Entry:42942 Library:NIST20M2.lib

SI:75 Formula:C<sub>18</sub>H<sub>54</sub>O<sub>7</sub>Si<sub>8</sub> CAS:556-69-4 MolWeight:606 RetIndex:1622

CompName:1,1,1,3,3,5,5,7,7,9,9,11,11,13,13,15,15-octadecamethyloctasiloxane \$\$ Polydimethylsilane Oil

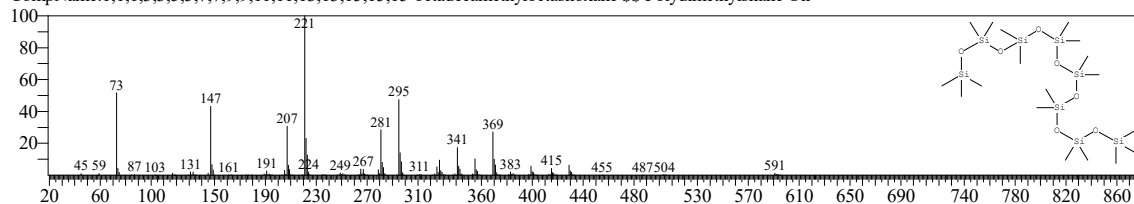

# TNAU

<< Target >>

Line#:14 R.Time:41.600(Scan#:7321) MassPeaks:362

RawMode:Averaged 41.595-41.605(7320-7322) BasePeak:355.05(1151)

BG Mode:Calc. from Peak Group 1 - Event 1 Q3 Scan

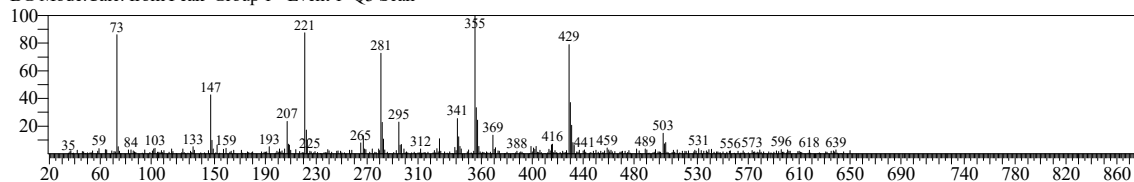

Hit#:1 Entry:46368 Library:NIST20M2.lib

SI:83 Formula:C<sub>24</sub>H<sub>72</sub>O<sub>12</sub>Si<sub>12</sub> CAS:18919-94-3 MolWeight:888 RetIndex:2480

CompName:Tetracosamethylcyclododecasiloxane \$\$ 2,2,4,4,6,6,8,8,10,10,12,12,14,14,16,16,18,18,20,20,22,22,24,24-Tetracosamethylcyclododecasiloxane



Hit#:2 Entry:45685 Library:NIST20M2.lib

SI:81 Formula:C<sub>20</sub>H<sub>60</sub>O<sub>10</sub>Si<sub>10</sub> CAS:18772-36-6 MolWeight:740 RetIndex:2067

CompName:Cyclododecasiloxane, eicosamethyl- \$\$ 2,2,4,4,6,6,8,8,10,10,12,12,14,14,16,16,18,18,20,20-Icosamethylcyclododecasiloxane # \$\$ Eicosamethyl-cy



Hit#:3 Entry:44570 Library:NIST20M2.lib

SI:80 Formula:C<sub>18</sub>H<sub>54</sub>O<sub>9</sub>Si<sub>9</sub> CAS:556-71-8 MolWeight:666 RetIndex:1860

CompName:Cyclononasiloxane, octadecamethyl- \$\$ Octadecamethyl-cyclononasiloxane \$\$ 2,2,4,4,6,6,8,8,10,10,12,12,14,14,16,16,18,18-Octadecamethylcy



Hit#:4 Entry:42942 Library:NIST20M2.lib

SI:74 Formula:C<sub>18</sub>H<sub>54</sub>O<sub>7</sub>Si<sub>8</sub> CAS:556-69-4 MolWeight:606 RetIndex:1622

CompName:1,1,1,3,3,5,5,7,7,9,9,11,11,13,13,15,15-octadecamethyloctasiloxane \$\$ Polydimethylsilane Oil

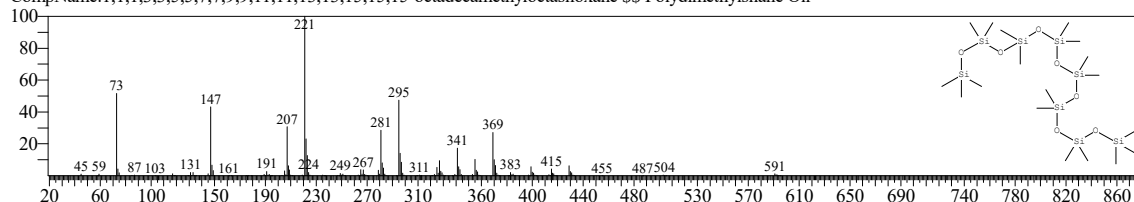

Hit#:5 Entry:43312 Library:NIST20R.lib

SI:74 Formula:C<sub>16</sub>H<sub>48</sub>O<sub>6</sub>Si<sub>7</sub> CAS:541-01-5 MolWeight:532 RetIndex:1437

CompName:Heptasiloxane, hexadecamethyl- \$\$ Hexadecamethylheptasiloxane \$\$ 1,1,1,3,3,5,5,7,7,9,9,11,11,13,13,13-Hexadecamethylheptasiloxane #

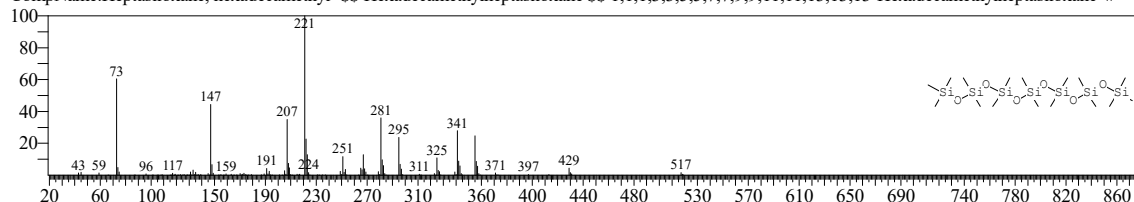

# TNAU

<< Target >>

Line#:15 R.Time:43.800(Scan#:7761) MassPeaks:382

RawMode:Averaged 43.795-43.805(7760-7762) BasePeak:355.00(1189)

BG Mode:Calc. from Peak Group 1 - Event 1 Q3 Scan

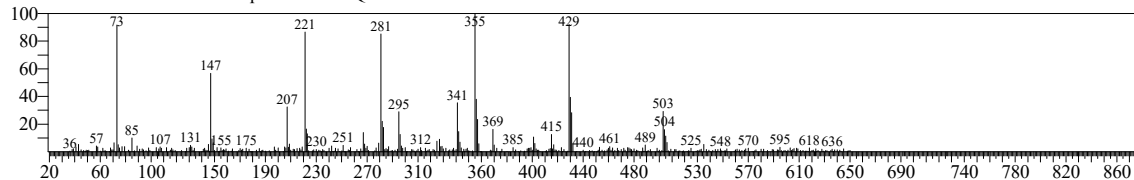

Hit#:1 Entry:46368 Library:NIST20M2.lib

SI:84 Formula:C<sub>24</sub>H<sub>72</sub>O<sub>12</sub>Si<sub>12</sub> CAS:18919-94-3 MolWeight:888 RetIndex:2480

CompName:Tetracosamethylcyclododecasiloxane \$\$ 2,2,4,4,6,6,8,8,10,10,12,12,14,14,16,16,18,18,20,20,22,22,24,24-Tetracosamethylcyclododecasiloxane

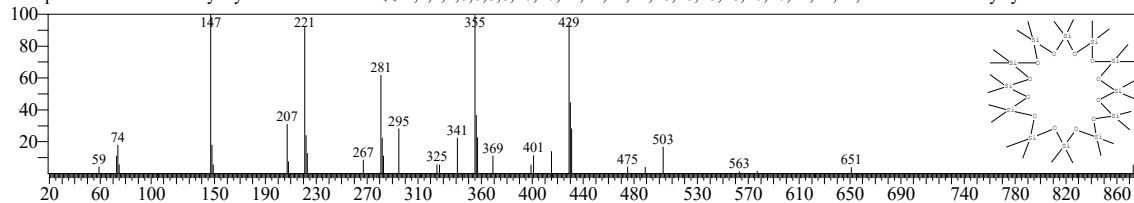

Hit#:2 Entry:45685 Library:NIST20M2.lib

SI:82 Formula:C<sub>20</sub>H<sub>60</sub>O<sub>10</sub>Si<sub>10</sub> CAS:18772-36-6 MolWeight:740 RetIndex:2067

CompName:Cyclododecasiloxane, eicosamethyl- \$\$ 2,2,4,4,6,6,8,8,10,10,12,12,14,14,16,16,18,18,20,20-Icosamethylcyclododecasiloxane # \$\$ Eicosamethyl-cy



Hit#:3 Entry:44570 Library:NIST20M2.lib

SI:79 Formula:C<sub>18</sub>H<sub>54</sub>O<sub>9</sub>Si<sub>9</sub> CAS:556-71-8 MolWeight:666 RetIndex:1860

CompName:Cyclononasiloxane, octadecamethyl- \$\$ Octadecamethyl-cyclononasiloxane \$\$ 2,2,4,4,6,6,8,8,10,10,12,12,14,14,16,16,18,18-Octadecamethylcy



Hit#:4 Entry:42942 Library:NIST20M2.lib

SI:71 Formula:C<sub>18</sub>H<sub>54</sub>O<sub>7</sub>Si<sub>8</sub> CAS:556-69-4 MolWeight:606 RetIndex:1622

CompName:1,1,1,3,3,5,5,7,7,9,9,11,11,13,13,15,15-octadecamethyloctasiloxane \$\$ Polydimethylsilane Oil



Hit#:5 Entry:43312 Library:NIST20R.lib

SI:71 Formula:C<sub>16</sub>H<sub>48</sub>O<sub>6</sub>Si<sub>7</sub> CAS:541-01-5 MolWeight:532 RetIndex:1437

CompName:Heptasiloxane, hexadecamethyl- \$\$ Hexadecamethylheptasiloxane \$\$ 1,1,1,3,3,5,5,7,7,9,9,11,11,13,13,13-Hexadecamethylheptasiloxane #





# TNAU

<< Target >>

Line#:16 R.Time:45.595(Scan#:8120) MassPeaks:434

RawMode:Averaged 45.590-45.600(8119-8121) BasePeak:139.10(6994)

BG Mode:Calc. from Peak Group 1 - Event 1 Q3 Scan

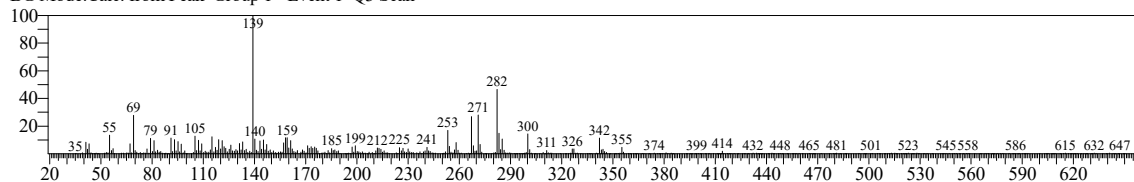

Hit#:1 Entry:8297 Library:NIST20M2.lib

SI:91 Formula:C27H42O3 CAS:512-04-9 MolWeight:414 RetIndex:2844

CompName:Diosgenin \$\$ Spirost-5-en-3-ol, (3.beta.,25R)- \$\$ Spirost-5-en-3.beta.-ol, (25R)- \$\$ Nitrogenin \$\$ 25D-spirost-5-en-3.beta.-ol \$\$ Spiro(8H-nap

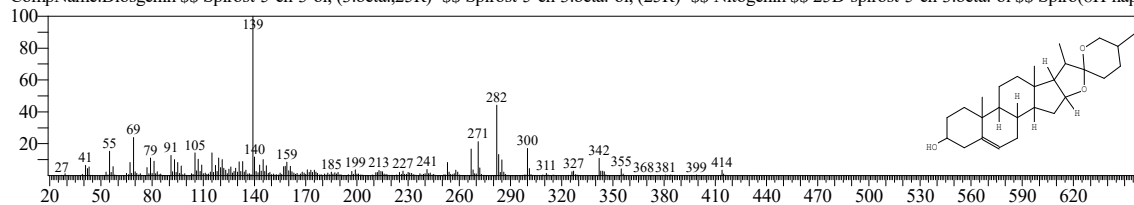

Hit#:2 Entry:14852 Library:NIST20M2.lib

SI:81 Formula:C28H44O3 CAS:116292-24-1 MolWeight:428 RetIndex:2793

CompName:Diosgenin methyl ether \$\$ Diosgenin Me derivative \$\$ (3.beta.,25R)-3-Methoxyspirost-5-ene \$\$ Spirost-5-ene, 3-methoxy-, (3.beta.,25R)-

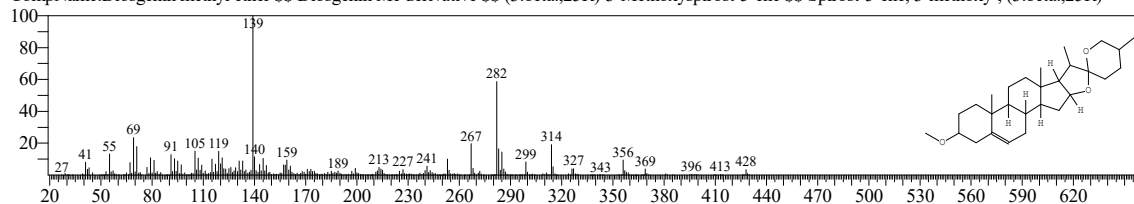

Hit#:3 Entry:41561 Library:NIST20R.lib

SI:81 Formula:C27H42O2 CAS:32277-73-9 MolWeight:398 RetIndex:2713

CompName:Des-N-solasodine \$\$ Furosta-5,20(22)-dien-3-ol #

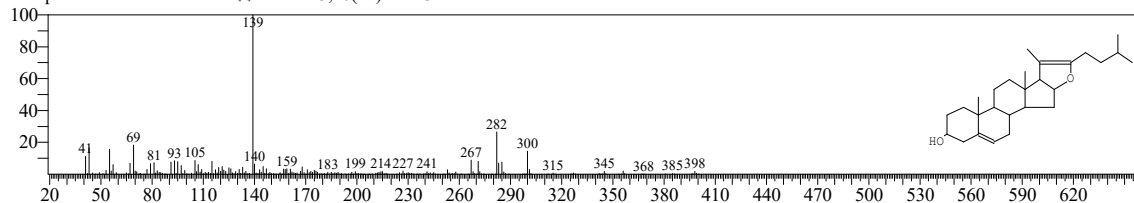

Hit#:4 Entry:24878 Library:NIST20M2.lib

SI:79 Formula:C29H44O4 CAS:1061-54-7 MolWeight:456 RetIndex:2984

CompName:Spirost-5-en-3-ol, acetate, (3.beta.,25R)- \$\$ Diosgenin acetate \$\$ Spirost-5-en-3.beta.-ol, acetate, (25R)- \$\$ Spirost-5-en-3.beta.-ol, acetate, (2

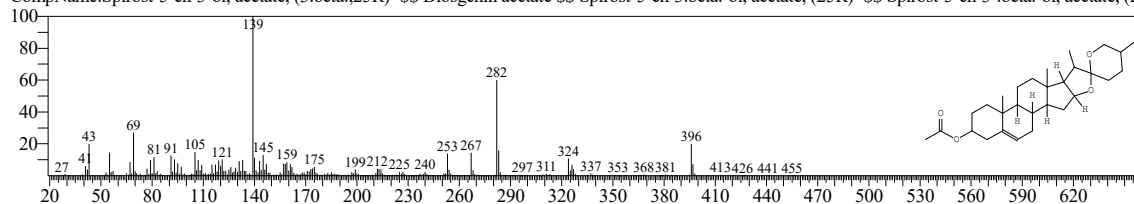

Hit#:5 Entry:42677 Library:NIST20R.lib

SI:75 Formula:C29H44O4 CAS:1180-12-7 MolWeight:456 RetIndex:2984

CompName:Neodiosgenin (3.beta.,25S) acetate \$\$ Spirost-5-en-3-ol, 3-acetate, (3.beta.,25S)- \$\$ Spirost-5-en-3-ol, acetate, (3.beta.,25S)- \$\$ Spirost-5-en-3

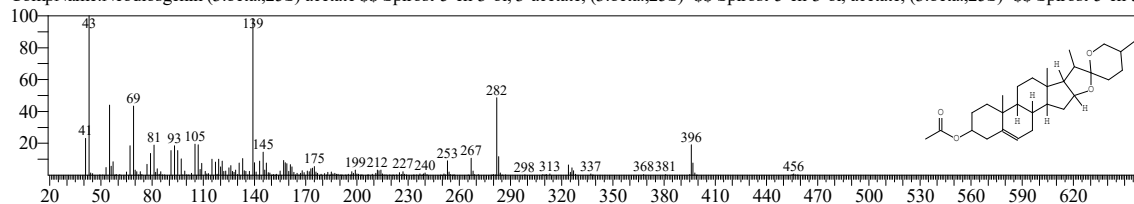

# TNAU

<< Target >>

Line#:17 R.Time:45.775(Scan#:8156) MassPeaks:364

RawMode:Averaged 45.770-45.780(8155-8157) BasePeak:355.05(1107)

BG Mode:Calc. from Peak Group 1 - Event 1 Q3 Scan

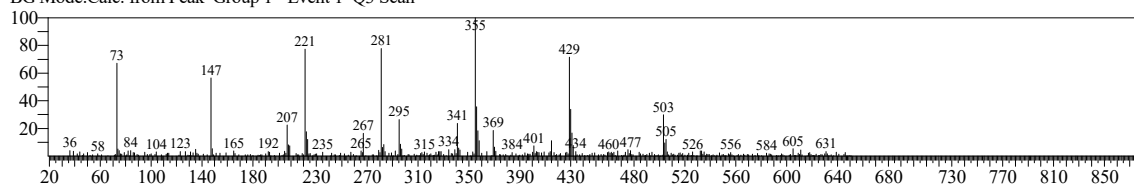

Hit#:1 Entry:46368 Library:NIST20M2.lib

SI:82 Formula:C24H72O12Si12 CAS:18919-94-3 MolWeight:888 RetIndex:2480

CompName:Tetracosamethyl-cyclododecasiloxane \$\$ 2,2,4,4,6,6,8,8,10,10,12,12,14,14,16,16,18,18,20,20,22,22,24,24-Tetracosamethylcyclododecasiloxan

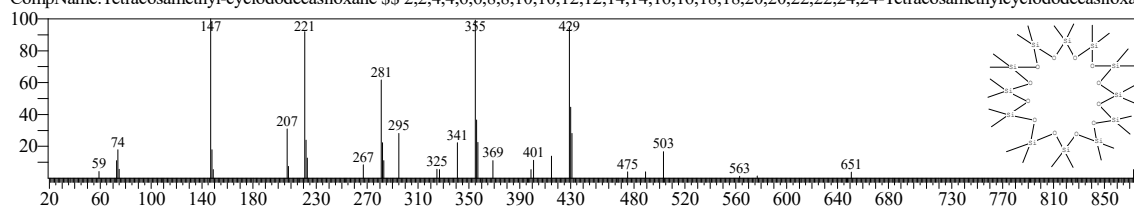

Hit#:2 Entry:43658 Library:NIST20R.lib

SI:78 Formula:C18H54O9Si9 CAS:556-71-8 MolWeight:666 RetIndex:1860

CompName:Cyclononasiloxane, octadecamethyl- \$\$ Octadecamethyl-cyclononasiloxane \$\$ 2,2,4,4,6,6,8,8,10,10,12,12,14,14,16,16,18,18-Octadecamethyley

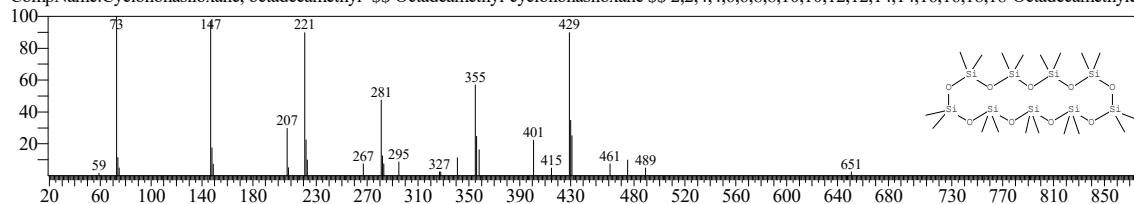

Hit#:3 Entry:45685 Library:NIST20M2.lib

SI:77 Formula:C20H60O10Si10 CAS:18772-36-6 MolWeight:740 RetIndex:2067

CompName:Cyclodecasiloxane, eicosamethyl- \$\$ 2,2,4,4,6,6,8,8,10,10,12,12,14,14,16,16,18,18,20,20-Icosamethylcyclodecasiloxane # \$\$ Eicosamethyl-cy

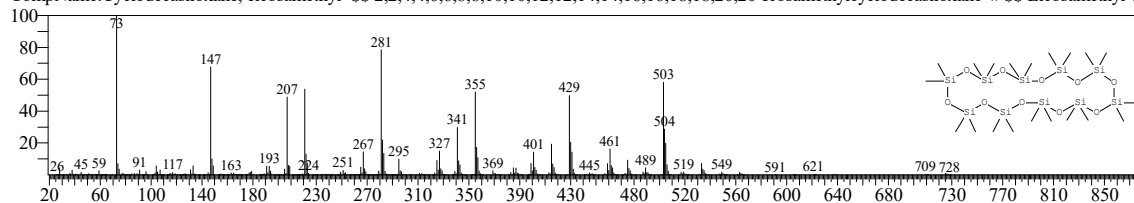

Hit#:4 Entry:42942 Library:NIST20M2.lib

SI:72 Formula:C18H54O7Si8 CAS:556-69-4 MolWeight:606 RetIndex:1622

CompName:1,1,1,3,3,5,5,7,9,9,11,11,13,13,15,15,15-octadecamethyloctasiloxane \$\$ Polydimethylsilane Oil

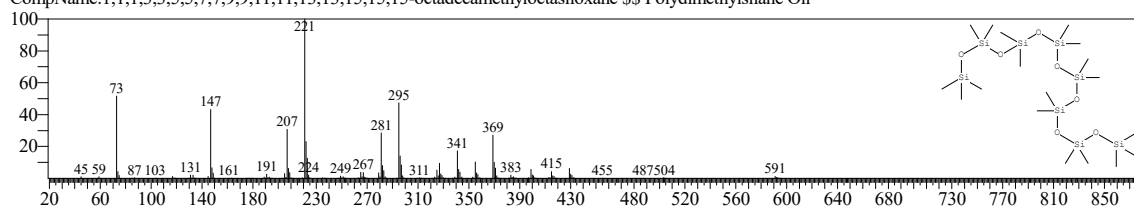

Hit#:5 Entry:45794 Library:NIST20M2.lib

SI:72 Formula:C22H66O9Si10 CAS:556-70-7 MolWeight:754 RetIndex:1991

CompName:1,1,1,3,3,5,5,7,9,9,11,11,13,13,15,15,17,17,19,19,19-docosamethyldecasiloxane \$\$ Polydimethylsilane Oil

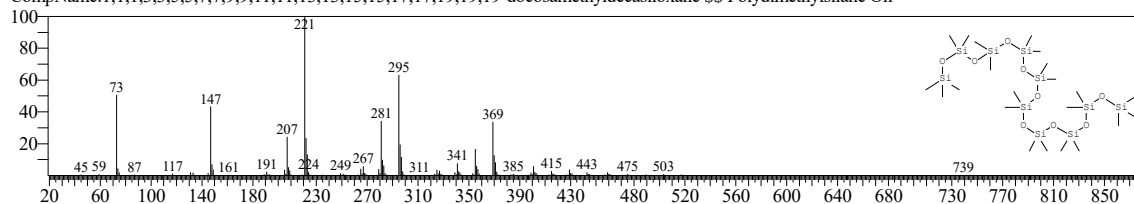

Supplement: Supplementary file 24 [file supplementary]
