# Supplementary material for: Comparative Metabolomics Profiling Reveals Key Metabolites and Associated Pathways Regulating Tuber Dormancy in White Yam (<em>Dioscorea rotundata</em>)
Source: Preprints.org preprint supplement (doi:10.20944/preprints202303.0378.v1), 2023-03-21

# TNAU

## Sample Information

Analyzed by : Admin  
 Analyzed : 02-Sep-22 3:14:54 AM  
 Sample Type : Unknown  
 Level # : 1  
 Sample Name : Sample  
 Sample ID : 4-2  
 IS Amount : [1]=1  
 Sample Amount : 1  
 Dilution Factor : 1  
 Vial # : 5  
 Injection Volume : 2.00  
 Data File : D:\GCMS-8040NX\Sep 2022\Users\01.09.2022\01092022012.qgd  
 Org Data File : D:\GCMS-8040NX\Sep 2022\Users\01.09.2022\01092022012.qgd  
 Method File : D:\GCMS-8040NX\Sep 2022\Method\Scan\_methodfile.qgm  
 Org Method File : D:\GCMS-8040NX\Sep 2022\Method\Scan\_methodfile.qgm  
 Report File :  
 Tuning File : D:\GCMS-8040NX\Aug 2022\Tuning Data\TUNING 25082022.qgt  
 Modified by : Admin  
 Modified : 05-Sep-22 10:59:53 AM

Chromatogram Sample D:\GCMS-8040NX\Sep 2022\Users\01.09.2022\01092022012.qgd

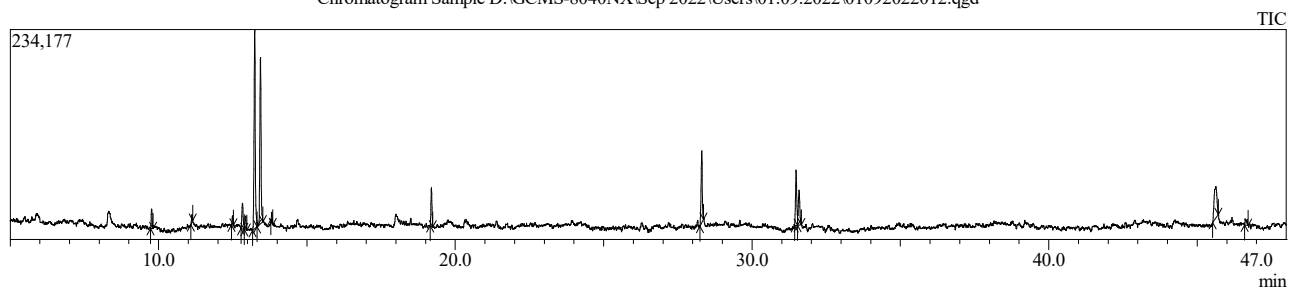

Peak Report TIC

| Peak# | R.Time | Area    | Area%  | Height | Height% | A/H  | Similarity | Name                                    |
|-------|--------|---------|--------|--------|---------|------|------------|-----------------------------------------|
| 1     | 9.767  | 50092   | 2.18   | 21699  | 2.82    | 2.31 | 94         | Pentasiloxane, dodecamethyl-            |
| 2     | 11.124 | 15209   | 0.66   | 8085   | 1.05    | 1.88 | 46         | Pimelic acid-2TMS                       |
| 3     | 12.487 | 19727   | 0.86   | 10350  | 1.35    | 1.91 | 31         | Succinylacetone-ox-origin fragment      |
| 4     | 12.824 | 89804   | 3.91   | 28515  | 3.71    | 3.15 | 72         | 2,5-Cyclohexadiene-1,4-dione, dioxime   |
| 5     | 12.932 | 38595   | 1.68   | 15181  | 1.97    | 2.54 | 71         | Morpholine, 4-methyl-, 4-oxide          |
| 6     | 13.239 | 633633  | 27.58  | 221892 | 28.86   | 2.86 | 54         | Methyl cis-13,16-Docosadienate          |
| 7     | 13.434 | 523332  | 22.78  | 185556 | 24.13   | 2.82 | 54         | Methyl cis-13,16-Docosadienate          |
| 8     | 13.816 | 20756   | 0.90   | 11085  | 1.44    | 1.87 | 84         | Trisiloxane, octamethyl-                |
| 9     | 19.195 | 102182  | 4.45   | 43378  | 5.64    | 2.36 | 96         | 2,4-Di-tert-butylphenoxytrimethylsilane |
| 10    | 28.305 | 224308  | 9.76   | 80135  | 10.42   | 2.80 | 95         | n-Hexadecanoic acid                     |
| 11    | 31.484 | 180444  | 7.85   | 62071  | 8.07    | 2.91 | 95         | 9,12-Octadecadienoic acid (Z,Z)-        |
| 12    | 31.586 | 138558  | 6.03   | 39159  | 5.09    | 3.54 | 90         | 9,12,15-Octadecatrienoic acid, (Z,Z,Z)- |
| 13    | 45.626 | 231597  | 10.08  | 34968  | 4.55    | 6.62 | 88         | Diosgenin                               |
| 14    | 46.622 | 29364   | 1.28   | 6896   | 0.90    | 4.26 | 23         | Linoleic acid-TMS                       |
|       |        | 2297601 | 100.00 | 768970 | 100.00  |      |            |                                         |

Library

# TNAU

<< Target >>

Line#:1 R.Time:9.765(Scan#:954) MassPeaks:310  
RawMode:Averaged 9.760-9.770(953-955) BasePeak:281.05(5859)  
BG Mode:Calc. from Peak Group 1 - Event 1 Q3 Scan

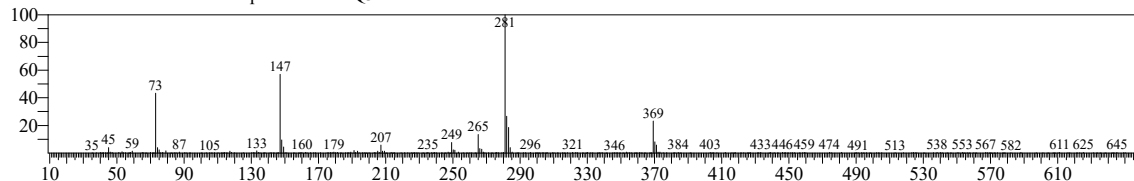

Hit#:1 Entry:40975 Library:NIST20R.lib

SI:94 Formula:C<sub>12</sub>H<sub>36</sub>O<sub>4</sub>Si<sub>5</sub> CAS:141-63-9 MolWeight:384 RetIndex:1068

CompName:Pentasiloxane, dodecamethyl- \$\$ Dodecamethylpentasiloxane \$\$ 1,1,1,3,3,5,5,7,7,9,9-Dodecamethylpentasiloxane #

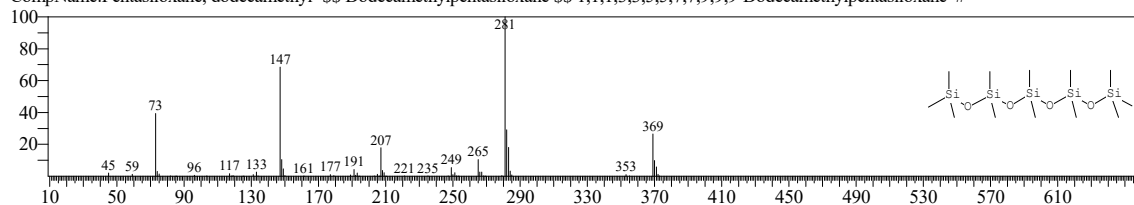

Hit#:2 Entry:249272 Library:NIST20M1.lib

SI:83 Formula:C<sub>12</sub>H<sub>36</sub>O<sub>4</sub>Si<sub>5</sub> CAS:3555-47-3 MolWeight:384 RetIndex:1068

CompName:Trisiloxane, 1,1,1,5,5,5-hexamethyl-3,3-bis[(trimethylsilyl)oxy]- \$\$ Tetrakis(trimethylsiloxy)silane \$\$ Trisiloxane, 1,1,1,5,5,5-hexamethyl-3,3-b

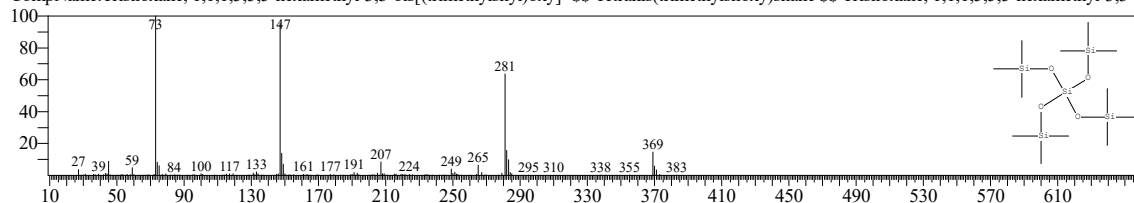

Hit#:3 Entry:27848 Library:NIST20M2.lib

SI:82 Formula:C<sub>18</sub>H<sub>48</sub>O<sub>4</sub>Si<sub>5</sub> CAS:0-00-0 MolWeight:468 RetIndex:1495

CompName:1,3,5,7,9-Pentasiloxane, 1,1,3,3,5,5,7,7,9,9-decamethyl-1,9-di(tert.butyl)-

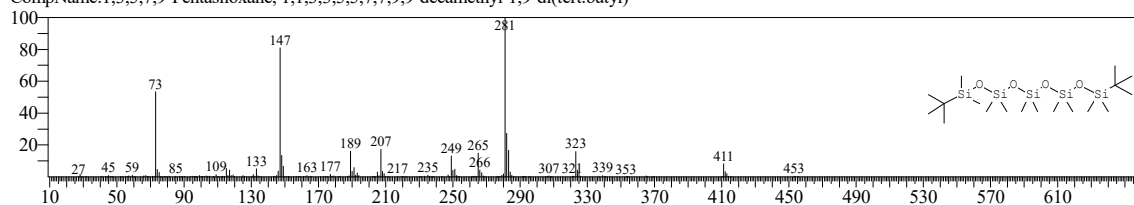

Hit#:4 Entry:249271 Library:NIST20M1.lib

SI:80 Formula:C<sub>12</sub>H<sub>36</sub>O<sub>4</sub>Si<sub>5</sub> CAS:38146-99-5 MolWeight:384 RetIndex:1068

CompName:1,1,1,3,5,5,7,7,7-Nonamethyl-3-(trimethylsiloxy)tetrasiloxane \$\$ 1,1,1,3,3,5,5,7,7,7-Nonamethyl-5-[(trimethylsilyl)oxy]tetrasiloxane #

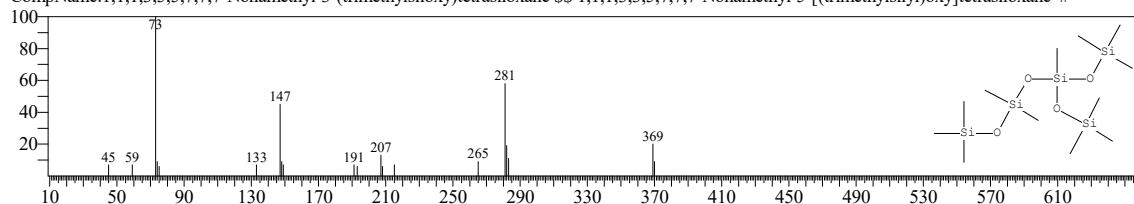

Hit#:5 Entry:158097 Library:NIST20M1.lib

SI:78 Formula:C<sub>14</sub>H<sub>24</sub>O<sub>3</sub>Si<sub>2</sub> CAS:0-00-0 MolWeight:296 RetIndex:1625

CompName:2,6-Dihydroxyacetophenone, 2TMS derivative \$\$ 2',6'-Dihydroxyacetophenone, bis(trimethylsilyl) ether

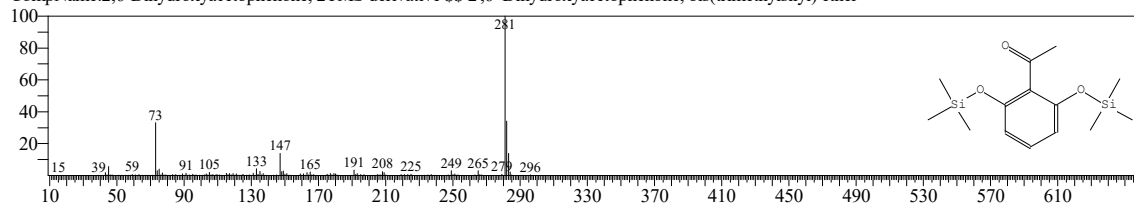

# TNAU

<< Target >>

Line#:2 R.Time:11.125(Scan#:1226) MassPeaks:358

RawMode:Averaged 11.120-11.130(1225-1227) BasePeak:124.05(782)

BG Mode:Calc. from Peak Group 1 - Event 1 Q3 Scan

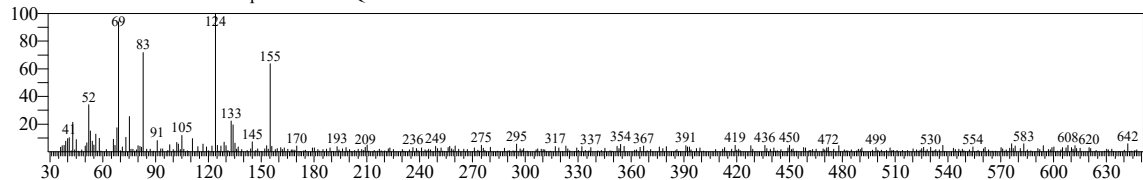

Hit#:1 Entry:196 Library:OA\_TMS\_DB5\_67min\_V3.lib

SI:46 Formula:C<sub>13</sub>H<sub>28</sub>O<sub>4</sub>Si<sub>2</sub> CAS:111-16-0 MolWeight:304 RetIndex:1605

CompName:Pinelic acid-2TMS ; heptanedioic acid

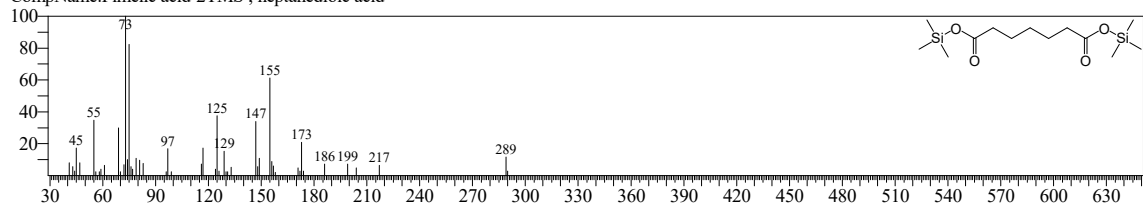

Hit#:2 Entry:485 Library:OA\_TMS\_DB5\_67min\_V3.lib

SI:42 Formula:C<sub>21</sub>H<sub>42</sub>O<sub>2</sub>Si CAS:112-80-1 MolWeight:354 RetIndex:2222

CompName:Oleic acid-TMS ; (Z)-octadec-9-enoic acid

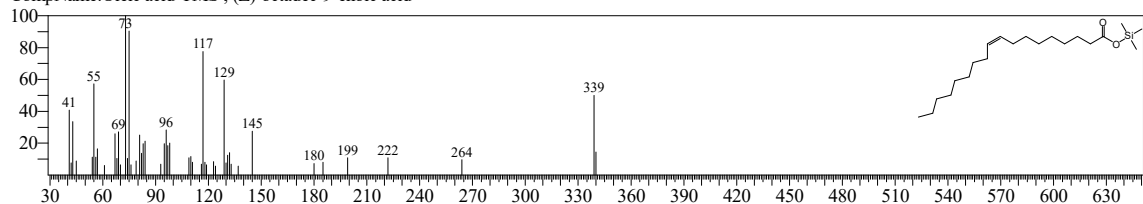

Hit#:3 Entry:165 Library:OA\_TMS\_DB5\_67min\_V3.lib

SI:41 Formula:C<sub>13</sub>H<sub>28</sub>O<sub>4</sub>Si<sub>2</sub> CAS:3058-01-3 MolWeight:304 RetIndex:1539

CompName:3-Methyladipic acid-2TMS ; 3-methylhexanedioic acid

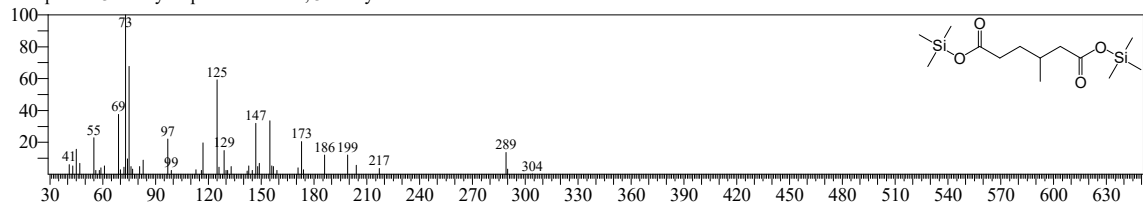

Hit#:4 Entry:442 Library:OA\_TMS\_DB5\_67min\_V3.lib

SI:40 Formula:C<sub>19</sub>H<sub>38</sub>O<sub>2</sub>Si CAS:373-49-9 MolWeight:326 RetIndex:2028

CompName:Palmitoleic acid-TMS ; hexadec-9-enoic acid

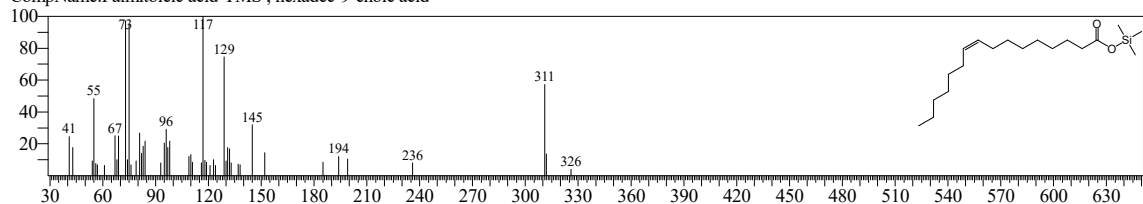

Hit#:5 Entry:484 Library:OA\_TMS\_DB5\_67min\_V3.lib

SI:38 Formula:C<sub>21</sub>H<sub>40</sub>O<sub>2</sub>Si CAS:60-33-3 MolWeight:352 RetIndex:2218

CompName:Linoleic acid-TMS ; octadeca-9,12-dienoic acid

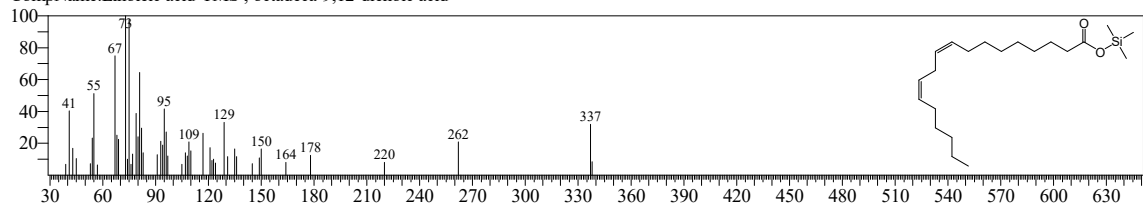

# TNAU

<< Target >>

Line#:3 R.Time:12.485(Scan#:1498) MassPeaks:379

RawMode:Averaged 12.480-12.490(1497-1499) BasePeak:138.05(2027)

BG Mode:Calc. from Peak Group 1 - Event 1 Q3 Scan

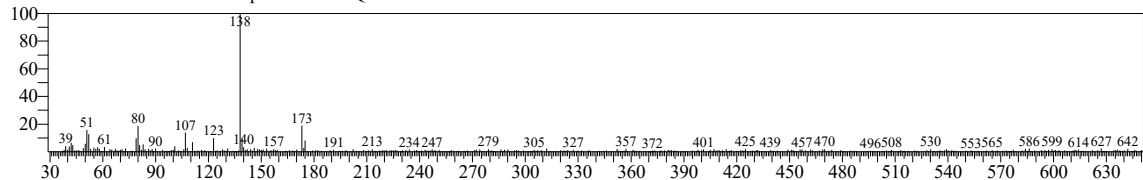

Hit#:1 Entry:127 Library:OA\_TMS\_DB5\_67min\_V3.lib

SI:31 Formula: CAS:51568-18-4 MolWeight:0 RetIndex:1453

CompName:Succinylacetone-ox-origin fragment ; 4,6-dioxoheptanoic acid

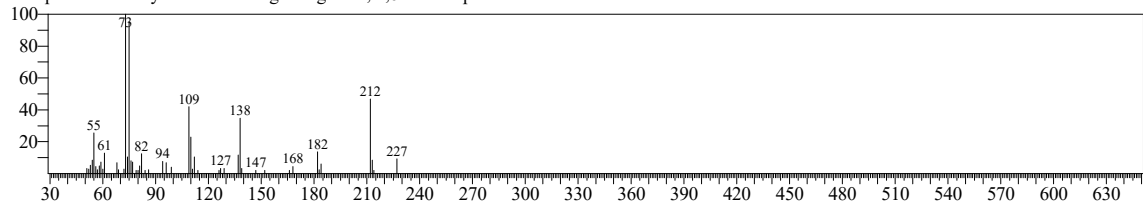

Hit#:2 Entry:11 Library:FA\_ME\_SP2560\_EI\_V3.lib

SI:30 Formula:C16H30O2 CAS:84743-29-3 MolWeight:254 RetIndex:2388

CompName:Methyl cis-10-pentadecenoate ; (Z)-pentadec-10-enoic acid

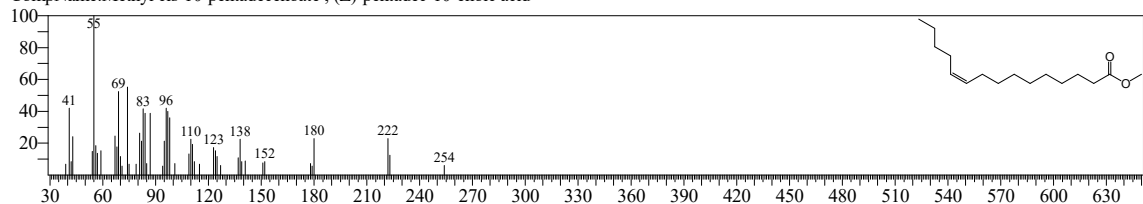

Hit#:3 Entry:34 Library:FA\_ME\_SP2560\_EI\_V3.lib

SI:30 Formula:C23H42O2 CAS:7370-49-2 MolWeight:350 RetIndex:3169

CompName:Methyl cis-13,16-Docosadienate ; (13Z,16E)-docosa-13,16-dienoic acid

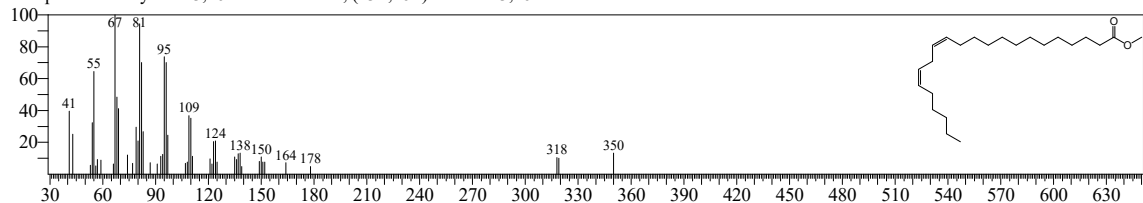

Hit#:4 Entry:25 Library:FA\_ME\_SP2560\_EI\_V3.lib

SI:29 Formula:C19H32O2 CAS:463-40-1 MolWeight:292 RetIndex:2892

CompName:Methyl linolenate ; (9Z,12Z,15Z)-octadeca-9,12,15-trienoic acid

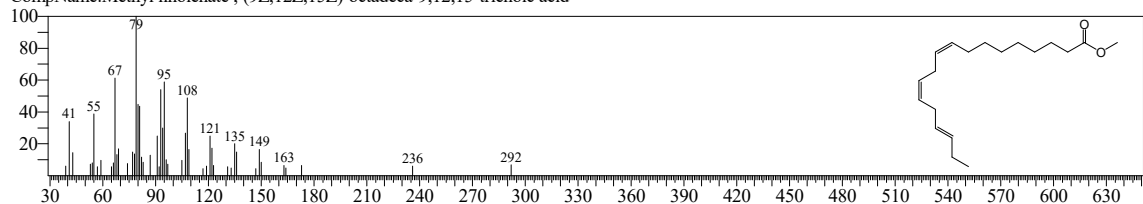

Hit#:5 Entry:20 Library:FA\_ME\_SP2560\_EI\_V3.lib

SI:29 Formula:C19H34O2 CAS:506-21-8 MolWeight:294 RetIndex:2727

CompName:Methyl linolelaidate ; (9E,12E)-octadeca-9,12-dienoic acid

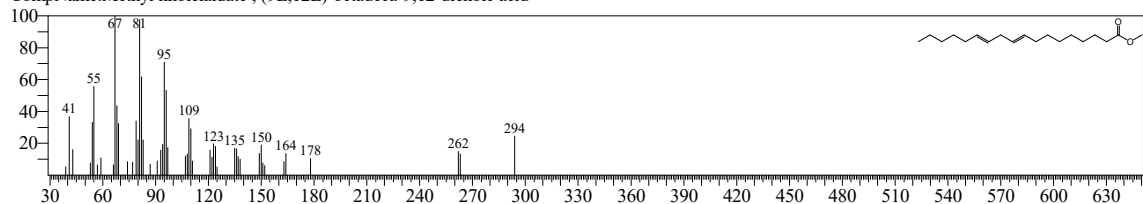

# TNAU

<< Target >>

Line#4 R.Time:12.825(Scan#:1566) MassPeaks:374

RawMode:Averaged 12.820-12.830(1565-1567) BasePeak:138.10(8471)

BG Mode:Calc. from Peak Group 1 - Event 1 Q3 Scan

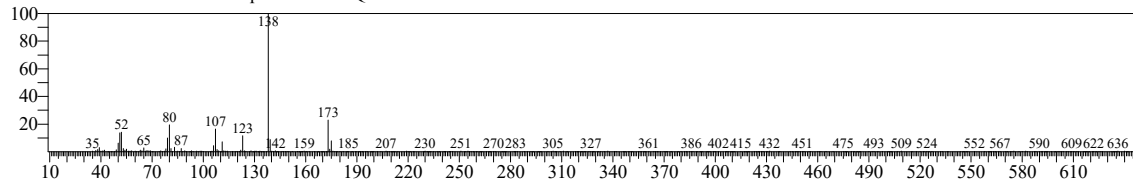

Hit#:1 Entry:8360 Library:NIST20R.lib

SI:72 Formula:C<sub>6</sub>H<sub>6</sub>N<sub>2</sub>O<sub>2</sub> CAS:105-11-3 MolWeight:138 RetIndex:1349

CompName:2,5-Cyclohexadiene-1,4-dione, dioxime \$\$ p-Benzoquinone, dioxime \$\$ p-Quinone dioxime \$\$ p-Quinone oxime \$\$ Benzoquinone dioxime \$\$

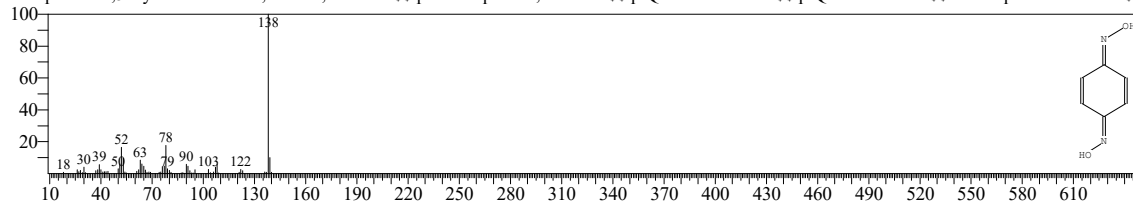

Hit#:2 Entry:11222 Library:NIST20M1.lib

SI:70 Formula:C<sub>7</sub>H<sub>10</sub>N<sub>2</sub>O CAS:3471-32-7 MolWeight:138 RetIndex:1325

CompName:Hydrazine, (4-methoxyphenyl)- \$\$ (p-Methoxyphenyl)hydrazine \$\$ 1-(4-Methoxyphenyl)hydrazine #

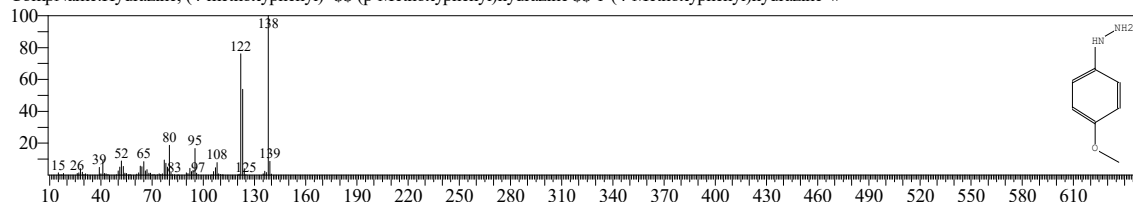

Hit#:3 Entry:34 Library:FA\_ME\_SP2560\_EI\_V3.lib

SI:36 Formula:C<sub>23</sub>H<sub>42</sub>O<sub>2</sub> CAS:7370-49-2 MolWeight:350 RetIndex:3169

CompName:Methyl cis-13,16-Docosadienate ; (13Z,16E)-docosa-13,16-dienoic acid

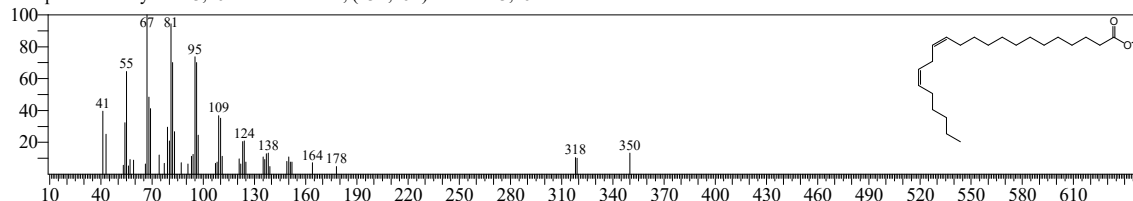

Hit#:4 Entry:21 Library:FA\_ME\_SP2560\_EI\_V3.lib

SI:36 Formula:C<sub>19</sub>H<sub>34</sub>O<sub>2</sub> CAS:60-33-3 MolWeight:294 RetIndex:2775

CompName:Methyl linoleate ; Octadeca-9,12-dienoic acid

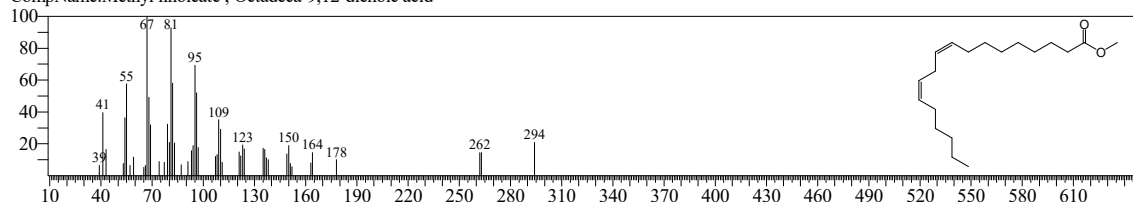

Hit#:5 Entry:25 Library:FA\_ME\_SP2560\_EI\_V3.lib

SI:36 Formula:C<sub>19</sub>H<sub>32</sub>O<sub>2</sub> CAS:463-40-1 MolWeight:292 RetIndex:2892

CompName:Methyl linolenate ; (9Z,12Z,15Z)-octadeca-9,12,15-trienoic acid

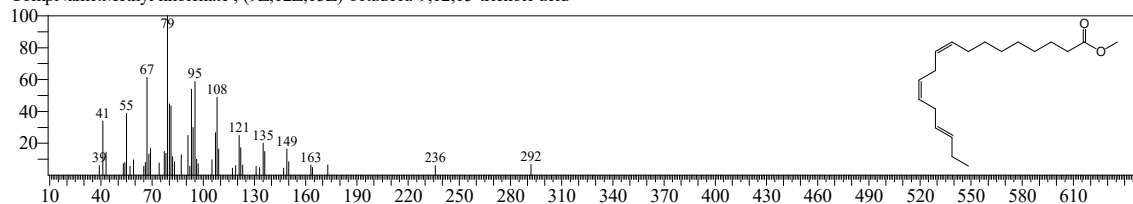

# TNAU

<< Target >>

Line#:5 R.Time:12.930(Scan#:1587) MassPeaks:400

RawMode:Averaged 12.925-12.935(1586-1588) BasePeak:146.10(1066)

BG Mode:Calc. from Peak Group 1 - Event 1 Q3 Scan

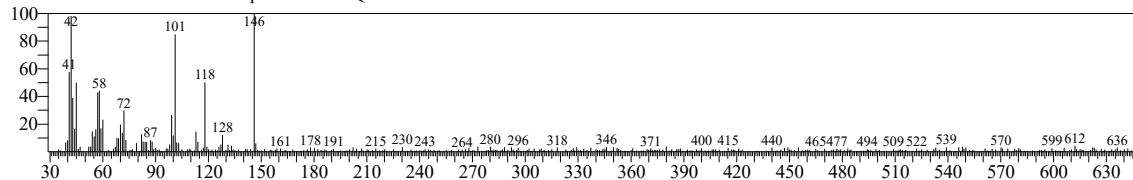

Hit#:1 Entry:5109 Library:NIST20M1.lib

SI:71 Formula:C5H11NO2 CAS:7529-22-8 MolWeight:117 RetIndex:0

CompName:Morpholine, 4-methyl-, 4-oxide \$\$ 4-Methylmorpholine 4-oxide \$\$ N-Methylmorpholine N-oxide \$\$ N-Methylmorpholine 4-oxide \$\$ N-Meth

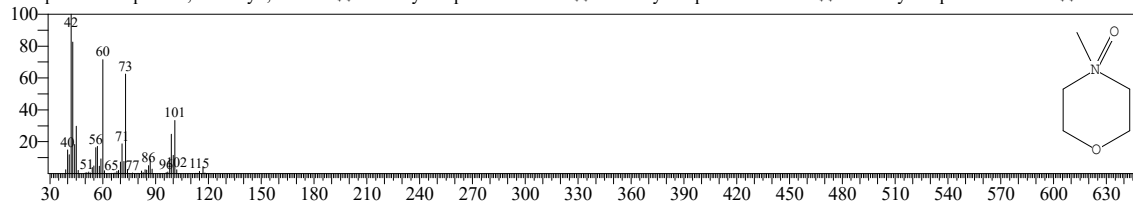

Hit#:2 Entry:139 Library:OA\_TMS\_DB5\_67min\_V3.lib

SI:48 Formula:C10H21NO3Si CAS:16284-60-9 MolWeight:231 RetIndex:1487

CompName:Isovalerylglycine-TMS ; 2-(3-methylbutanoylamino)acetic acid

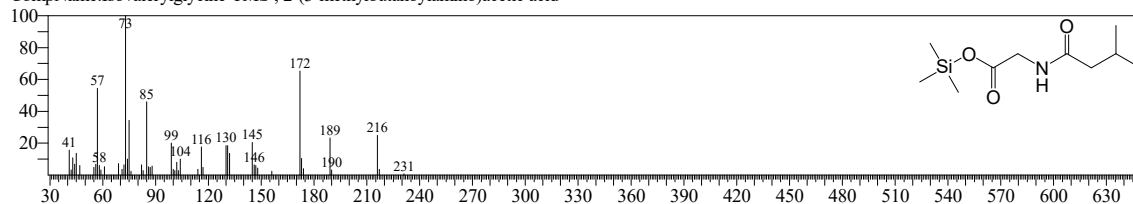

Hit#:3 Entry:2 Library:OA\_TMS\_DB5\_67min\_V3.lib

SI:47 Formula:C6H13NO3Si CAS:298-12-4 MolWeight:175 RetIndex:990

CompName:Glyoxylic acid-meto-TMS ; oxaldehydic acid

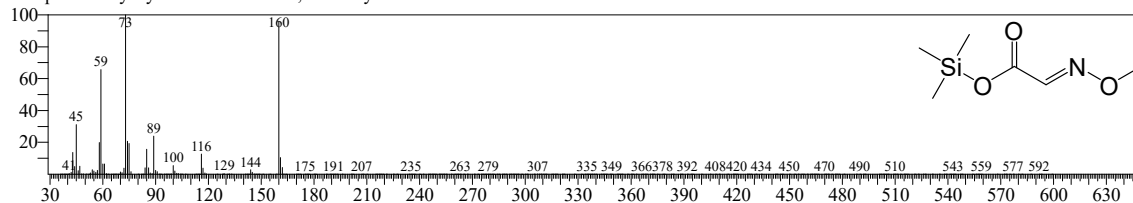

Hit#:4 Entry:1 Library:FA\_ME\_SP2560\_EI\_V3.lib

SI:47 Formula:C5H10O2 CAS:107-92-6 MolWeight:102 RetIndex:1113

CompName:Methyl butanoate ; Butanoic acid

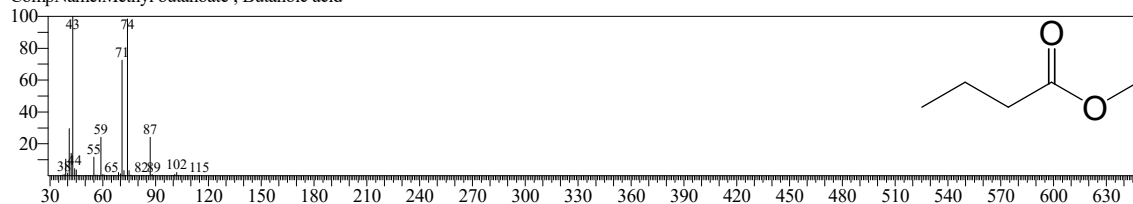

Hit#:5 Entry:39 Library:OA\_TMS\_DB5\_67min\_V3.lib

SI:45 Formula:C10H21NO3Si CAS:816-66-0 MolWeight:231 RetIndex:1181

CompName:2-Ketoisocaproic acid-meto-TMS(1) ; 4-methyl-2-oxopentanoic acid

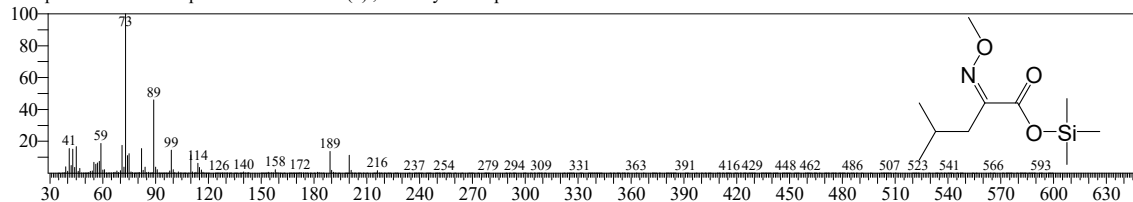

# TNAU

<< Target >>

Line#:6 R.Time:13.240(Scan#:1649) MassPeaks:342

RawMode:Averaged 13.235-13.245(1648-1650) BasePeak:155.05(35297)

BG Mode:Calc. from Peak Group 1 - Event 1 Q3 Scan

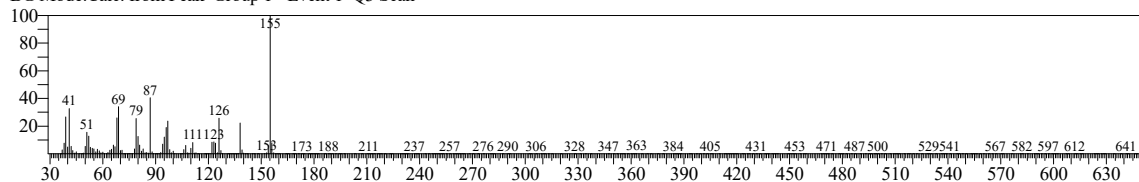

Hit#:1 Entry:34 Library:FA\_ME\_SP2560\_EI\_V3.lib

SI:54 Formula:C23H42O2 CAS:7370-49-2 MolWeight:350 RetIndex:3169

CompName:Methyl cis-13,16-Docosadienate ; (13Z,16E)-docosa-13,16-dienoic acid

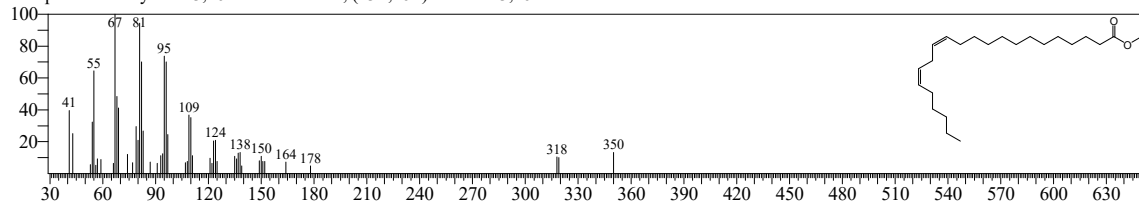

Hit#:2 Entry:21 Library:FA\_ME\_SP2560\_EI\_V3.lib

SI:52 Formula:C19H34O2 CAS:60-33-3 MolWeight:294 RetIndex:2775

CompName:Methyl linoleate ; Octadeca-9,12-dienoic acid

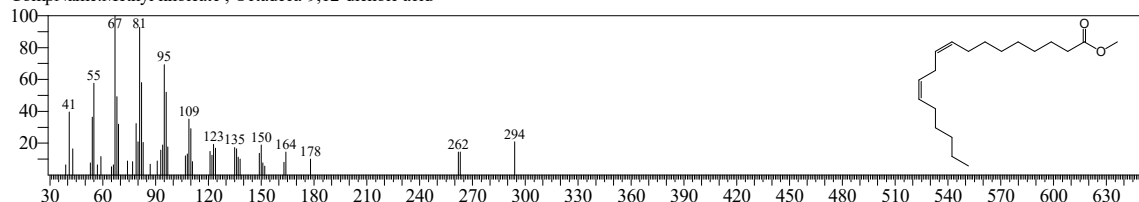

Hit#:3 Entry:20 Library:FA\_ME\_SP2560\_EI\_V3.lib

SI:52 Formula:C19H34O2 CAS:506-21-8 MolWeight:294 RetIndex:2727

CompName:Methyl linolelaidate ; (9E,12E)-octadeca-9,12-dienoic acid

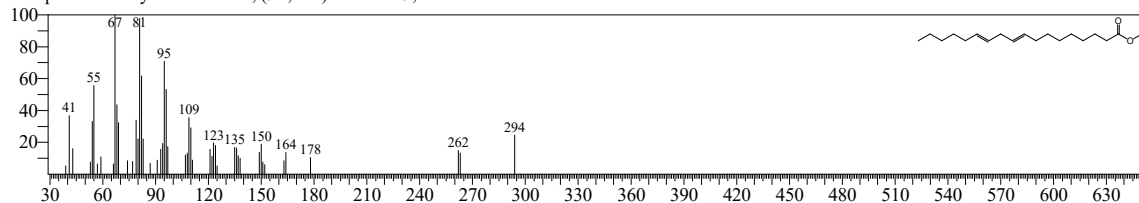

Hit#:4 Entry:27 Library:FA\_ME\_SP2560\_EI\_V3.lib

SI:52 Formula:C21H38O2 CAS:2091-39-6 MolWeight:322 RetIndex:2973

CompName:Methyl cis-11,14-Icosadienoate ; Icosa-11,14-dienoic acid

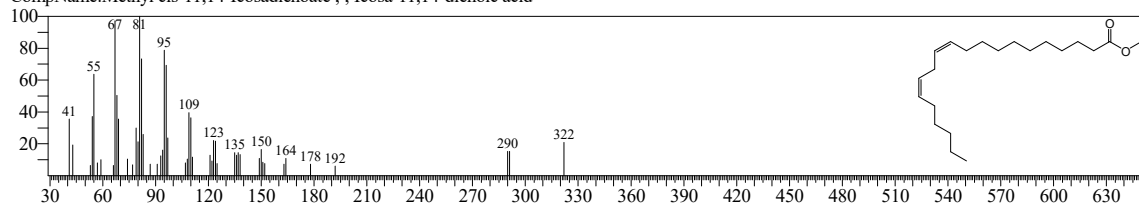

Hit#:5 Entry:11 Library:FA\_ME\_SP2560\_EI\_V3.lib

SI:52 Formula:C16H30O2 CAS:84743-29-3 MolWeight:254 RetIndex:2388

CompName:Methyl cis-10-pentadecenoate ; (Z)-pentadec-10-enoic acid

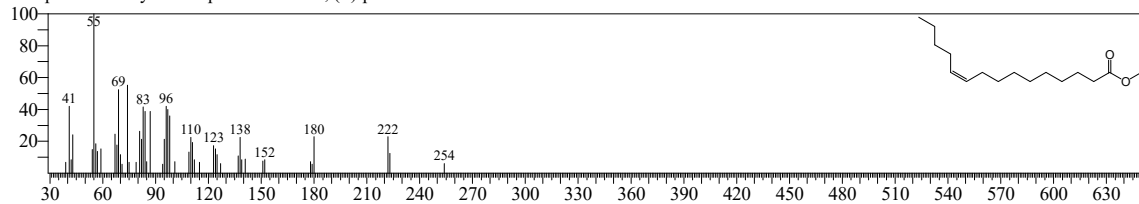

# TNAU

<< Target >>

Line#:7 R.Time:13.435(Scan#:1688) MassPeaks:369

RawMode:Averaged 13.430-13.440(1687-1689) BasePeak:155.05(29377)

BG Mode:Calc. from Peak Group 1 - Event 1 Q3 Scan

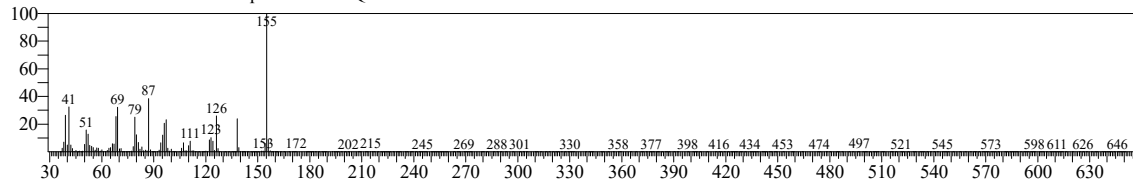

Hit#:1 Entry:34 Library:FA\_ME\_SP2560\_EI\_V3.lib

SI:54 Formula:C23H42O2 CAS:7370-49-2 MolWeight:350 RetIndex:3169

CompName:Methyl cis-13,16-Docosadienate ; (13Z,16E)-docosa-13,16-dienoic acid

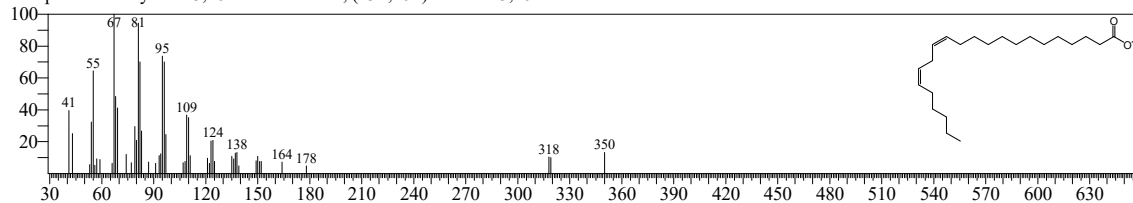

Hit#:2 Entry:21 Library:FA\_ME\_SP2560\_EI\_V3.lib

SI:52 Formula:C19H34O2 CAS:60-33-3 MolWeight:294 RetIndex:2775

CompName:Methyl linoleate ; Octadeca-9,12-dienoic acid

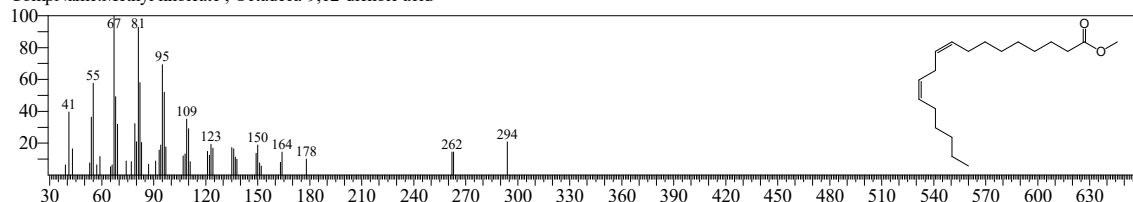

Hit#:3 Entry:20 Library:FA\_ME\_SP2560\_EI\_V3.lib

SI:52 Formula:C19H34O2 CAS:506-21-8 MolWeight:294 RetIndex:2727

CompName:Methyl linolelaidate ; (9E,12E)-octadeca-9,12-dienoic acid

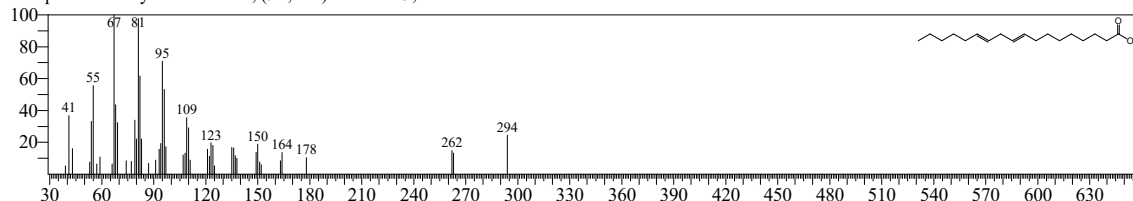

Hit#:4 Entry:27 Library:FA\_ME\_SP2560\_EI\_V3.lib

SI:52 Formula:C21H38O2 CAS:2091-39-6 MolWeight:322 RetIndex:2973

CompName:Methyl cis-11,14-Icosadienoate ; Icosa-11,14-dienoic acid

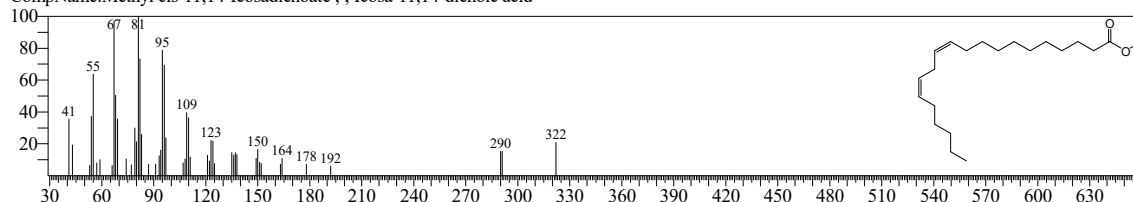

Hit#:5 Entry:11 Library:FA\_ME\_SP2560\_EI\_V3.lib

SI:52 Formula:C16H30O2 CAS:84743-29-3 MolWeight:254 RetIndex:2388

CompName:Methyl cis-10-pentadecenoate ; (Z)-pentadec-10-enoic acid

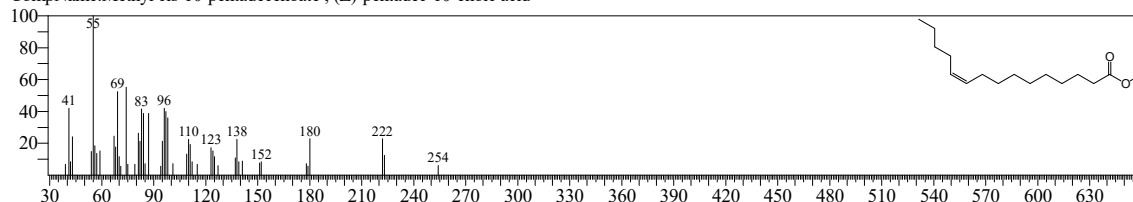



# TNAU

<< Target >>

Line#:8 R.Time:13.815(Scan#:1764) MassPeaks:313

RawMode:Averaged 13.810-13.820(1763-1765) BasePeak:221.10(3580)

BG Mode:Calc. from Peak Group 1 - Event 1 Q3 Scan

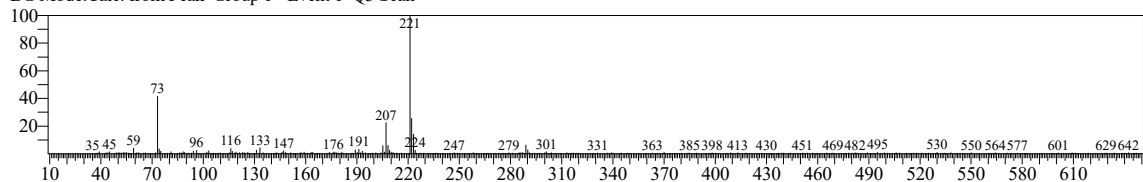

Hit#:1 Entry:28950 Library:NIST20R.lib

SI:84 Formula:C8H24O2Si3 CAS:107-51-7 MolWeight:236 RetIndex:698

CompName:Trisiloxane, octamethyl- \$\$ Octamethyltrisiloxane \$\$ Silane, dimethylbis(trimethylsiloxy)- \$\$(CH3)3

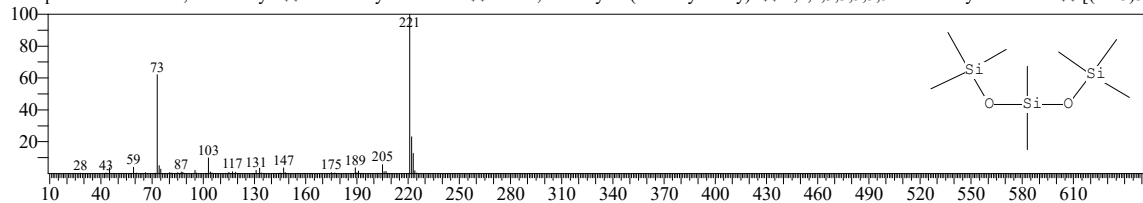

Hit#:2 Entry:33791 Library:NIST20R.lib

SI:78 Formula:C9H27BO3Si3 CAS:4325-85-3 MolWeight:278 RetIndex:0

CompName:Boric acid, 3TMS derivative \$\$ Tris(trimethylsilyl)borate \$\$ Silanol, trimethyl-, triester with boric acid (H3BO3) \$\$ Borane, tris(trimethylsiloxy)

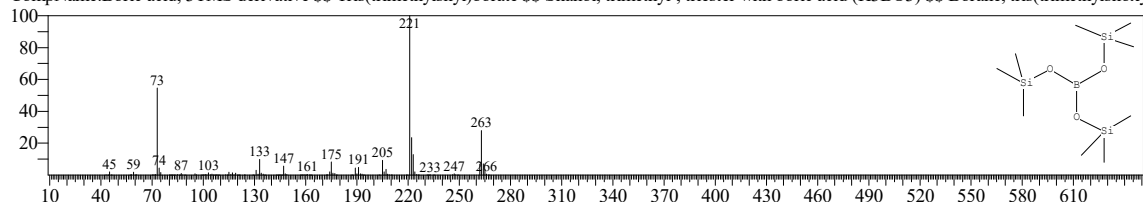

Hit#:3 Entry:186590 Library:NIST20M1.lib

SI:77 Formula:C14H36O2Si3 CAS:0-00-0 MolWeight:320 RetIndex:1126

CompName:1,3,5-Trisiloxane, 1,1,3,3,5,5-hexamethyl-1,5-di(tert.butyl)-

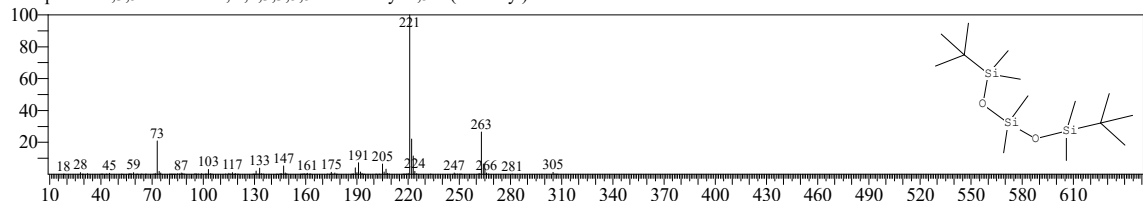

Hit#:4 Entry:186586 Library:NIST20M1.lib

SI:77 Formula:C14H32O2SSi2 CAS:82112-29-6 MolWeight:320 RetIndex:1482

CompName:Thioglycolic acid, S-(tert-butyl)dimethylsilyl-, tert-butyl)dimethylsilyl ester

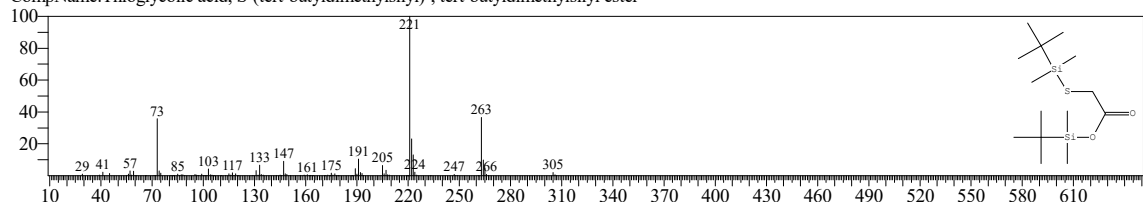

Hit#:5 Entry:155460 Library:NIST20M1.lib

SI:74 Formula:C10H30O2Si4 CAS:4342-25-0 MolWeight:294 RetIndex:807

CompName:3,6-Dioxa-2,4,5,7-tetrasilaoctane, 2,2,4,4,5,5,7,7-octamethyl- \$\$ 2,2,4,4,5,5,7,7-Octamethyl-3,6-dioxa-2,4,5,7-tetrasilaoctane #

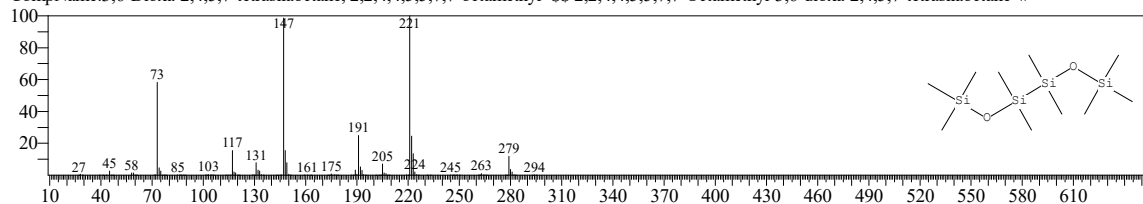

# TNAU

<< Target >>

Line#9 R.Time:19.195(Scan#:2840) MassPeaks:353

RawMode:Averaged 19.190-19.200(2839-2841) BasePeak:263.20(17803)

BG Mode:Calc. from Peak Group 1 - Event 1 Q3 Scan

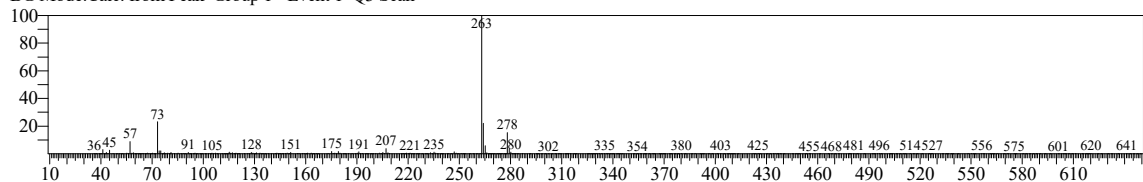

Hit#:1 Entry:33874 Library:NIST20R.lib

SI:96 Formula:C17H30OSi CAS:53925-65-8 MolWeight:278 RetIndex:1632

CompName:2,4-Di-tert-butylphenoxytrimethylsilane \$\$ Benzene, 2,4-bis(1,1-dimethylethyl)-1-[(trimethylsilyl)oxy]- \$\$ Silane, [2,4-bis(1,1-dimethylethyl)ph

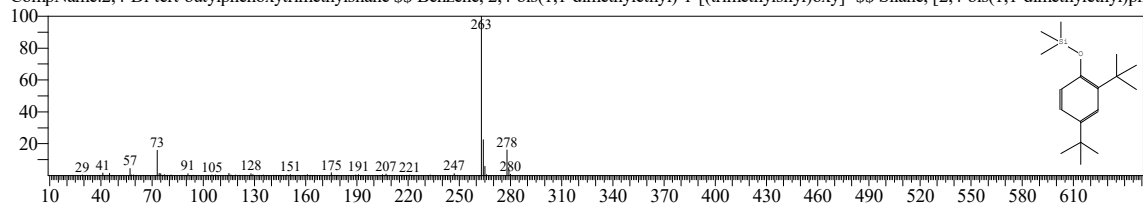

Hit#:2 Entry:33871 Library:NIST20R.lib

SI:86 Formula:C17H30OSi CAS:10416-73-6 MolWeight:278 RetIndex:1632

CompName:2,6-Bis(tert-butyl)phenol, TMS derivative \$\$ Trimethyl(2,6 di-tert-butylphenoxy)silane \$\$ (2,6-Di-tert-butylphenoxy)(trimethyl)silane #

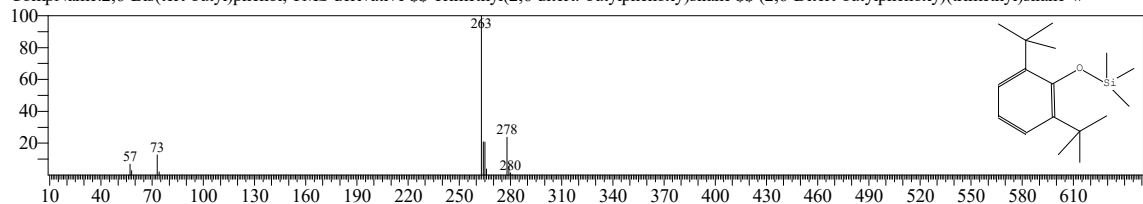

Hit#:3 Entry:136557 Library:NIST20M1.lib

SI:85 Formula:C12H22N4Si2 CAS:0-00-0 MolWeight:278 RetIndex:1703

CompName:3-Deazaadenine, 2TMS \$\$ 3-Deazaadenine, N,N'-bis-TMS \$\$ 1H-Imidazo[4,5-c]pyridin-4-amine, N,N'-bis-TMS

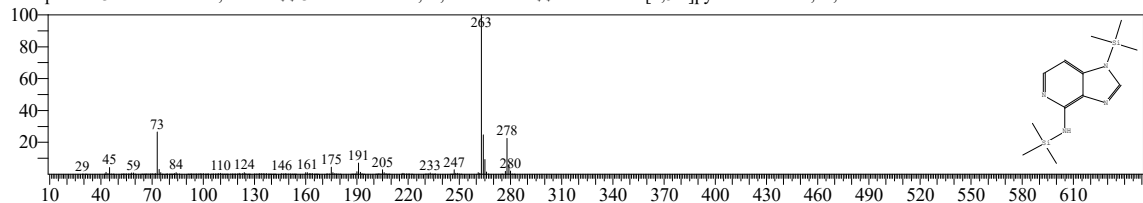

Hit#:4 Entry:137020 Library:NIST20M1.lib

SI:80 Formula:C15H22O3Si CAS:0-00-0 MolWeight:278 RetIndex:1736

CompName:6-Methoxy-2,2-dimethyl-2,3-dihydro-4H-chromen-4-one, TMS \$\$ 6-Methoxy-2,2-dimethyl-chroman-4-one, O-trimethylsilyl- \$\$ 4H-1-Benzopy

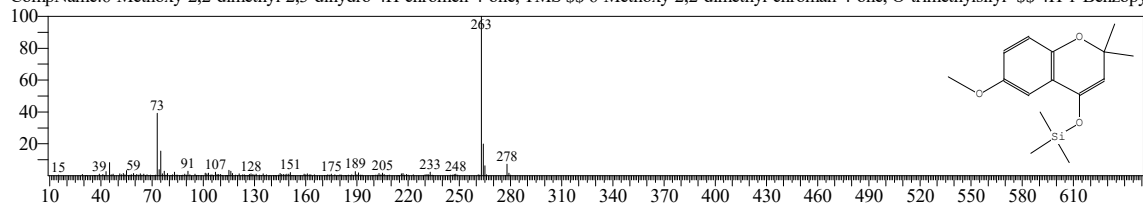

Hit#:5 Entry:259338 Library:NIST20M1.lib

SI:80 Formula:C23H30O4Si CAS:0-00-0 MolWeight:398 RetIndex:2735

CompName:2-[1-(1,3-benzodioxol-5-yl)propan-2-yl]-6-methoxy-4-prop-2-enylphenol, TMS derivative \$\$ 2-[1-(1,3-Benzodioxol-5-yl)propan-2-yl]-6-metho

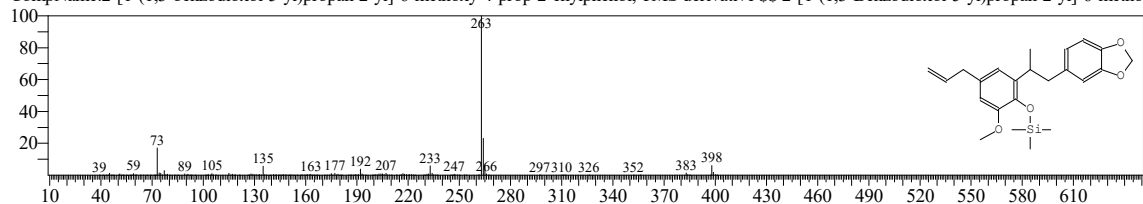

# TNAU

<< Target >>

Line#:10 R.Time:28.305(Scan#:4662) MassPeaks:403

RawMode:Averaged 28.300-28.310(4661-4663) BasePeak:73.05(6615)

BG Mode:Calc. from Peak Group 1 - Event 1 Q3 Scan

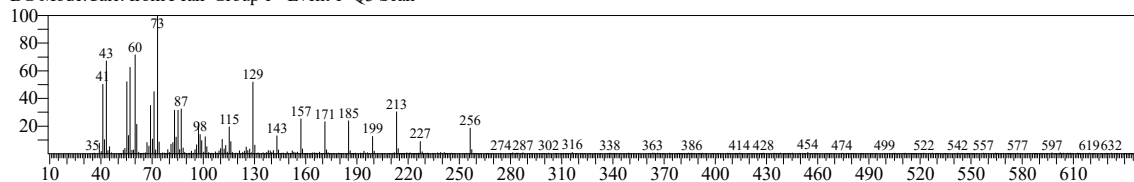

Hit#:1 Entry:31600 Library:NIST20R.lib

SI:95 Formula:C16H32O2 CAS:57-10-3 MolWeight:256 RetIndex:1968

CompName:n-Hexadecanoic acid \$\$ Hexadecanoic acid \$\$ n-Hexadecic acid \$\$ Palmitic acid \$\$ Pentadecanecarboxylic acid \$\$ 1-Pentadecanecarboxylic

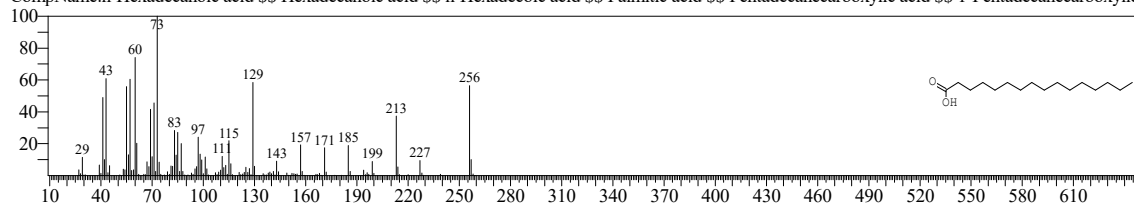

Hit#:2 Entry:29890 Library:NIST20R.lib

SI:91 Formula:C15H30O2 CAS:1002-84-2 MolWeight:242 RetIndex:1869

CompName:Pentadecanoic acid \$\$ Pentadecylic acid \$\$ n-Pentadecanoic acid \$\$ n-Pentadecylic acid

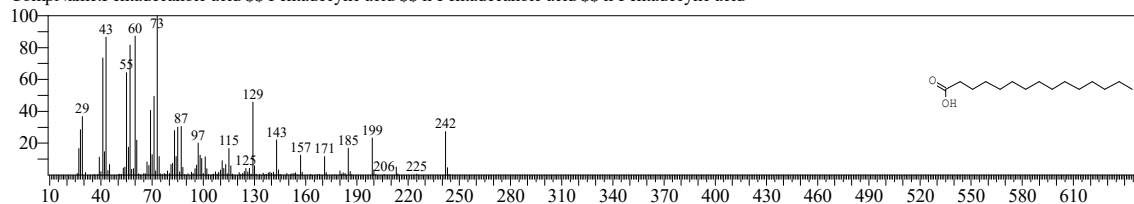

Hit#:3 Entry:25643 Library:NIST20R.lib

SI:90 Formula:C13H26O2 CAS:638-53-9 MolWeight:214 RetIndex:1670

CompName:Tridecanoic acid \$\$ n-Tridecanoic acid \$\$ n-Tridecoic acid \$\$ Tridecyclic acid

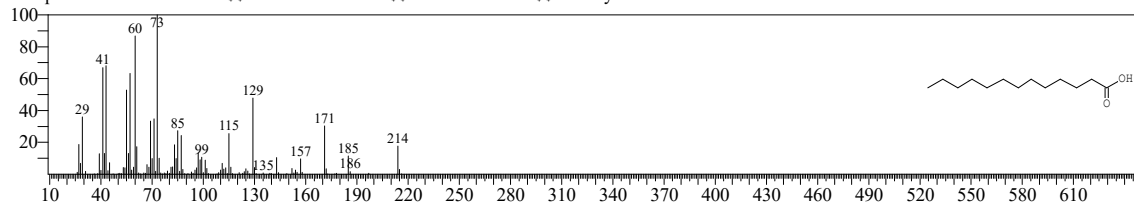

Hit#:4 Entry:44286 Library:NIST20M2.lib

SI:90 Formula:C38H68O8 CAS:28474-90-0 MolWeight:652 RetIndex:4765

CompName:l-(+)-Ascorbic acid 2,6-dihexadecanoate

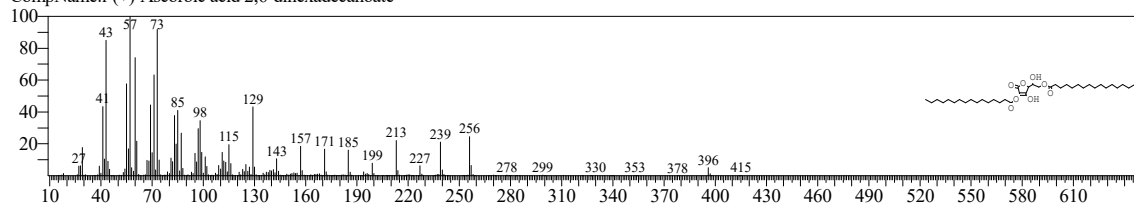

Hit#:5 Entry:81713 Library:NIST20M1.lib

SI:89 Formula:C14H28O2 CAS:544-63-8 MolWeight:228 RetIndex:1769

CompName:Tetradecanoic acid \$\$ Myristic acid \$\$ n-Tetradecanoic acid \$\$ n-Tetradecic acid \$\$ Neo-Fat 14 \$\$ Univol U 316S \$\$ 1-Tridecanecarboxylic ;

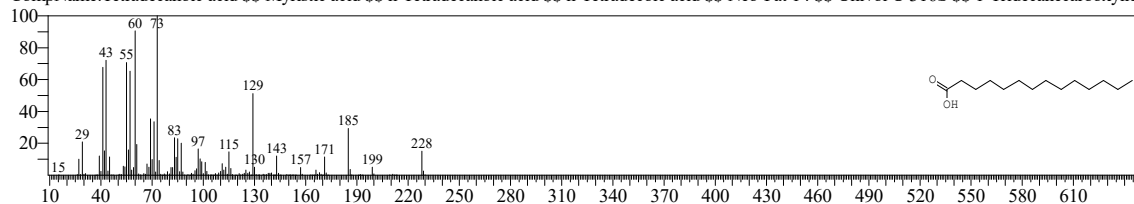

# TNAU

<< Target >>

Line#:11 R.Time:31.485(Scan#:5298) MassPeaks:373

RawMode:Averaged 31.480-31.490(5297-5299) BasePeak:67.05(5326)

BG Mode:Calc. from Peak Group 1 - Event 1 Q3 Scan

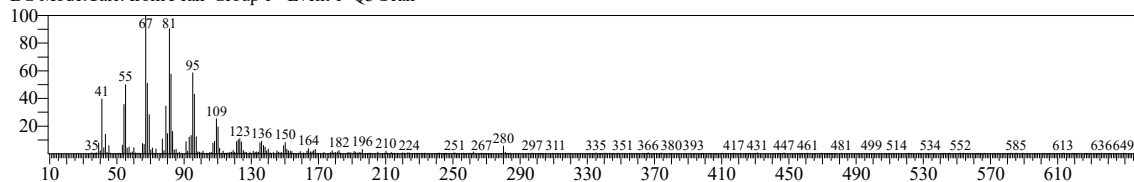

Hit#:1 Entry:34035 Library:NIST20R.lib

SI:95 Formula:C18H32O2 CAS:60-33-3 MolWeight:280 RetIndex:2183

CompName:9,12-Octadecadienoic acid (Z,Z)- \$\$ cis-9,cis-12-Octadecadienoic acid \$\$ cis,cis-Linoleic acid \$\$ Grape seed oil \$\$ Linoleic acid \$

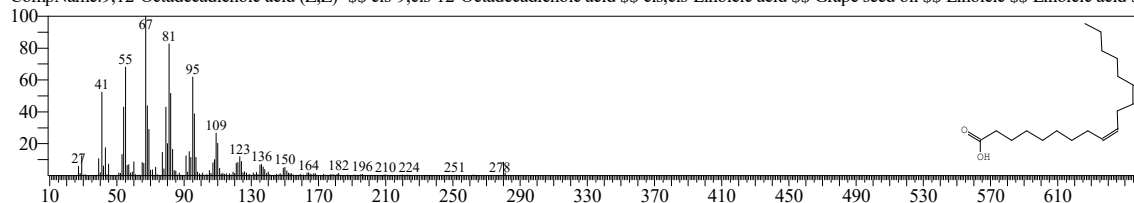

Hit#:2 Entry:139646 Library:NIST20M1.lib

SI:95 Formula:C18H32O2 CAS:2420-56-6 MolWeight:280 RetIndex:2183

CompName:10E,12Z-Octadecadienoic acid

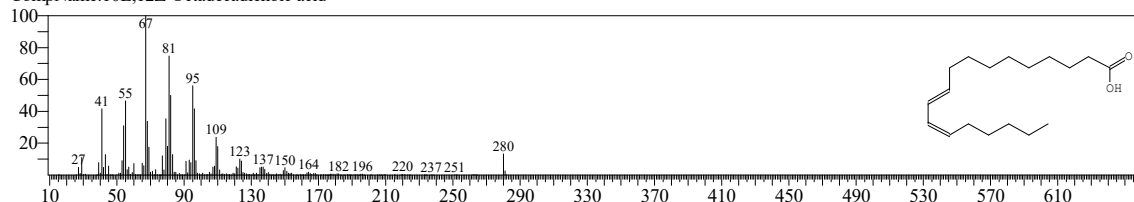

Hit#:3 Entry:139651 Library:NIST20M1.lib

SI:95 Formula:C18H32O2 CAS:544-71-8 MolWeight:280 RetIndex:2183

CompName:(9E,11E)-Octadecadienoic acid

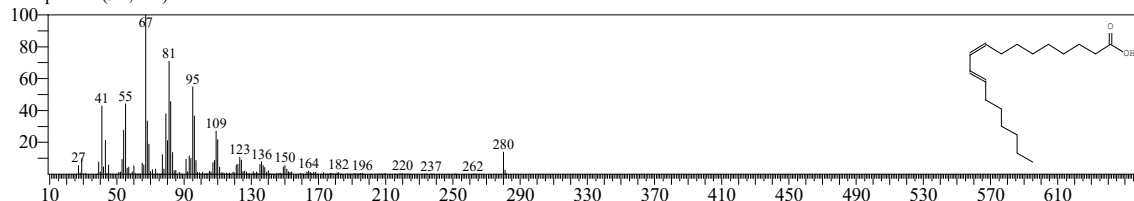

Hit#:4 Entry:139661 Library:NIST20M1.lib

SI:94 Formula:C18H32O2 CAS:506-21-8 MolWeight:280 RetIndex:2183

CompName:Linoelaidic acid

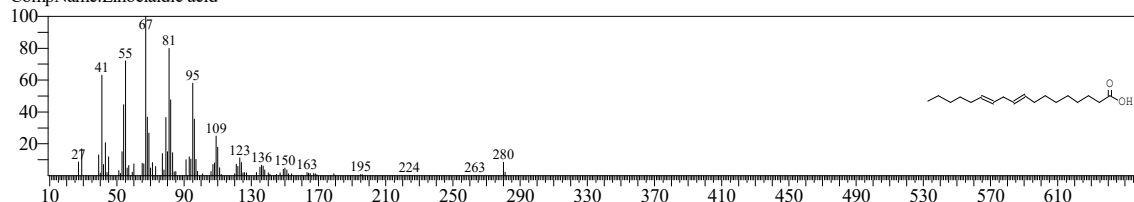

Hit#:5 Entry:173215 Library:NIST20M1.lib

SI:93 Formula:C20H36O2 CAS:2091-39-6 MolWeight:308 RetIndex:2382

CompName:11,14-Eicosadienoic acid

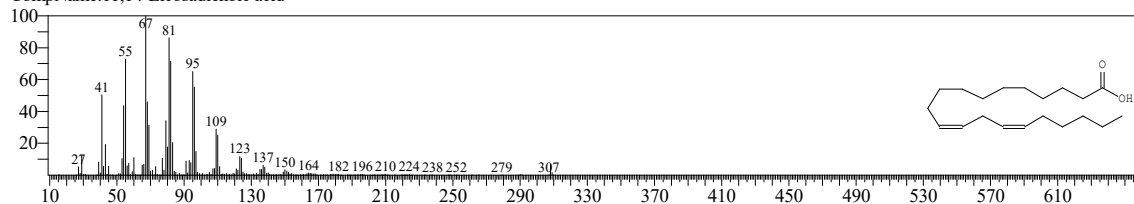

# TNAU

<< Target >>

Line#:12 R.Time:31.585(Scan#:5318) MassPeaks:324

RawMode:Averaged 31.580-31.590(5317-5319) BasePeak:79.05(2799)

BG Mode:Calc. from Peak Group 1 - Event 1 Q3 Scan

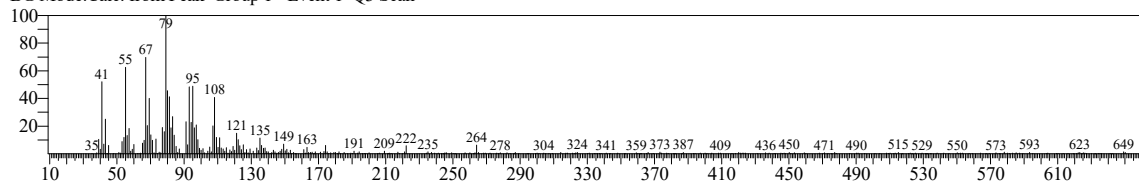

Hit#:1 Entry:137464 Library:NIST20M1.lib

SI:90 Formula:C18H30O2 CAS:463-40-1 MolWeight:278 RetIndex:2191

CompName:9,12,15-Octadecatrienoic acid, (Z,Z,Z)- \$\$ Linolenic acid \$\$ .alpha.-Linolenic acid \$\$ All-cis-9,12,15-Octadecatrienoic acid \$\$ cis,cis,cis-9,12,15-Octadecatrienoic acid

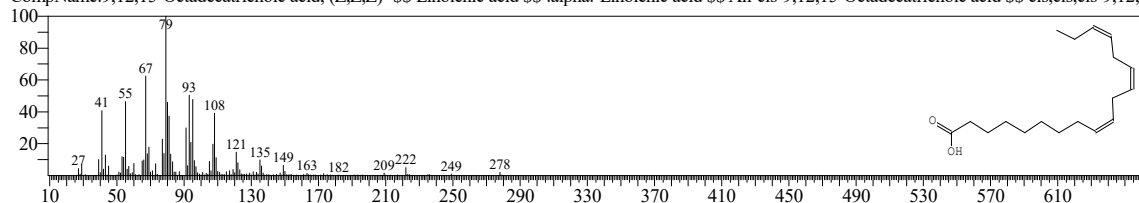

Hit#:2 Entry:87848 Library:NIST20M1.lib

SI:88 Formula:C16H26O CAS:56797-43-4 MolWeight:234 RetIndex:1824

CompName:cis,cis,cis-7,10,13-Hexadecatrienal \$\$ (7Z,10Z,13Z)-7,10,13-Hexadecatrienal #

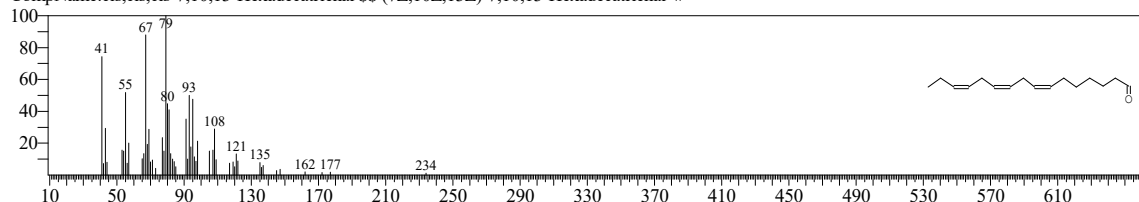

Hit#:3 Entry:121160 Library:NIST20M1.lib

SI:88 Formula:C18H32O CAS:506-44-5 MolWeight:264 RetIndex:2077

CompName:9,12,15-Octadecatrien-1-ol, (Z,Z,Z)- \$\$ (9E,12E,15E)-9,12,15-Octadecatrien-1-ol # \$\$ (Z,Z,Z)-9,12,15-Octadecatrien-1-ol

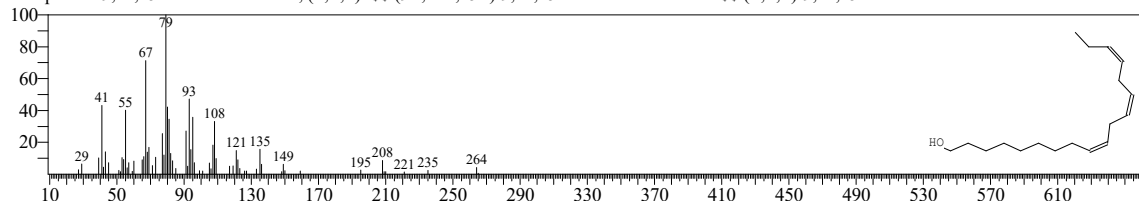

Hit#:4 Entry:35226 Library:NIST20R.lib

SI:87 Formula:C19H32O2 CAS:301-00-8 MolWeight:292 RetIndex:2101

CompName:9,12,15-Octadecatrienoic acid, methyl ester, (Z,Z,Z)- \$\$ Linolenic acid, methyl ester \$\$ Methyl all-cis-9,12,15-octadecatrienoate \$\$ Methyl lino

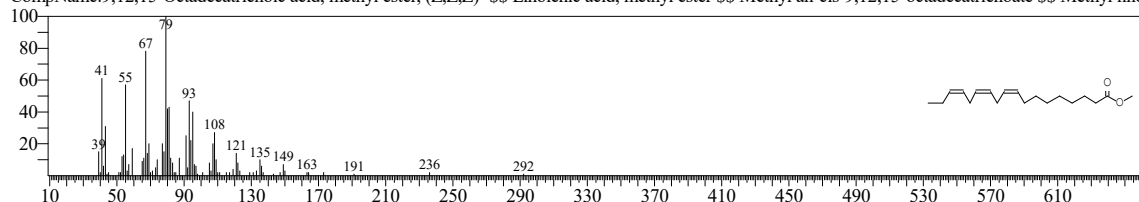

Hit#:5 Entry:171056 Library:NIST20M1.lib

SI:87 Formula:C20H34O2 CAS:17046-59-2 MolWeight:306 RetIndex:2390

CompName:Eicosatrienoic acid, 11(Z),14(Z),17(Z)

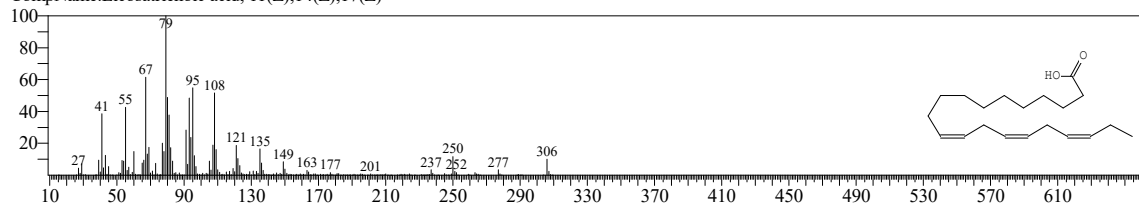

# TNAU

<< Target >>

Line#:13 R.Time:45.625(Scan#:8126) MassPeaks:386

RawMode:Averaged 45.620-45.630(8125-8127) BasePeak:139.10(3543)

BG Mode:Calc. from Peak Group 1 - Event 1 Q3 Scan

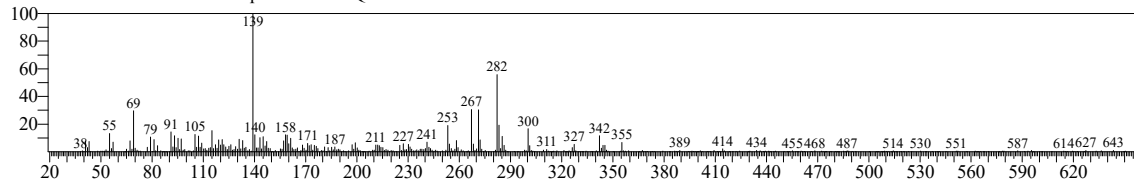

Hit#:1 Entry:8297 Library:NIST20M2.lib

SI:88 Formula:C27H42O3 CAS:512-04-9 MolWeight:414 RetIndex:2844

CompName:Diosgenin \$\$ Spirost-5-en-3-ol, (3.beta.,25R)- \$\$ Spirost-5-en-3.beta.-ol, (25R)- \$\$ Nitrogenin \$\$ 25D-spirost-5-en-3.beta.-ol \$\$ Spiro(8H-nap

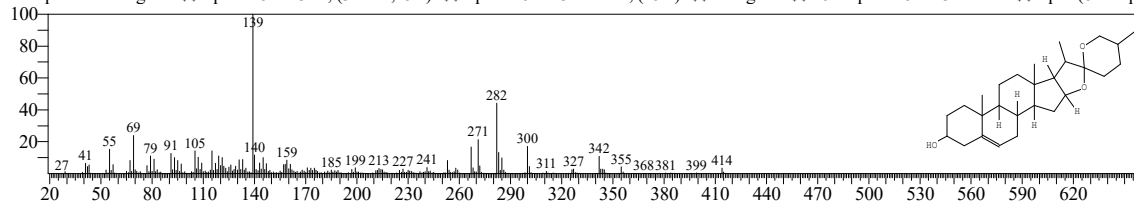

Hit#:2 Entry:14852 Library:NIST20M2.lib

SI:79 Formula:C28H44O3 CAS:116292-24-1 MolWeight:428 RetIndex:2793

CompName:Diosgenin methyl ether \$\$ Diosgenin Me derivative \$\$ (3.beta.,25R)-3-Methoxyspirost-5-ene \$\$ Spirost-5-ene, 3-methoxy-, (3.beta.,25R)-

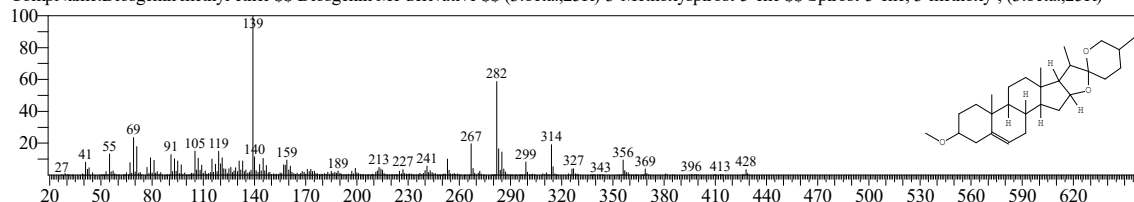

Hit#:3 Entry:41561 Library:NIST20R.lib

SI:78 Formula:C27H42O2 CAS:32277-73-9 MolWeight:398 RetIndex:2713

CompName:Des-N-solasodine \$\$ Furosta-5,20(22)-dien-3-ol #

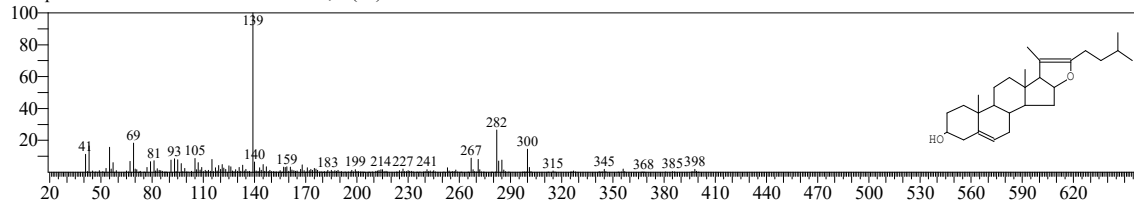

Hit#:4 Entry:24878 Library:NIST20M2.lib

SI:76 Formula:C29H44O4 CAS:1061-54-7 MolWeight:456 RetIndex:2984

CompName:Spirost-5-en-3-ol, acetate, (3.beta.,25R)- \$\$ Diosgenin acetate \$\$ Spirost-5-en-3.beta.-ol, acetate, (25R)- \$\$ Spirost-5-en-3.beta.-ol, acetate, (2

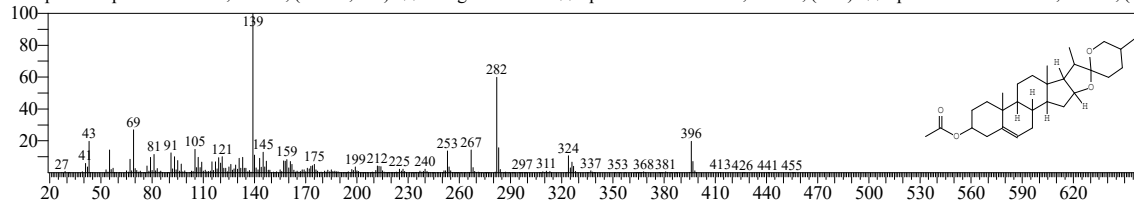

Hit#:5 Entry:42677 Library:NIST20R.lib

SI:72 Formula:C29H44O4 CAS:1180-12-7 MolWeight:456 RetIndex:2984

CompName:Neodiosgenin (3.beta.,25S) acetate \$\$ Spirost-5-en-3-ol, 3-acetate, (3.beta.,25S)- \$\$ Spirost-5-en-3-ol, acetate, (3.beta.,25S)- \$\$ Spirost-5-en-3-

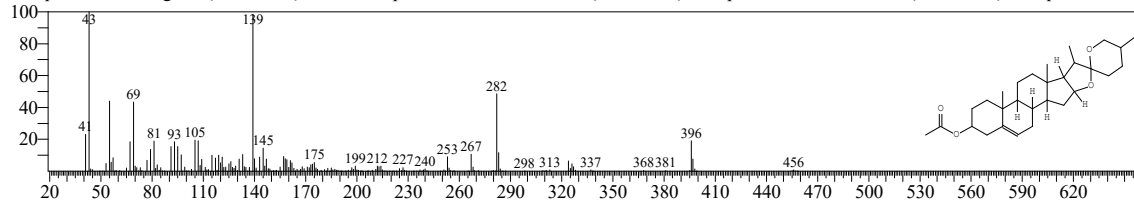

# TNAU

<< Target >>

Line#:14 R.Time:46.620(Scan#:8325) MassPeaks:441

RawMode:Averaged 46.615-46.625(8324-8326) BasePeak:207.05(181)

BG Mode:Calc. from Peak Group 1 - Event 1 Q3 Scan

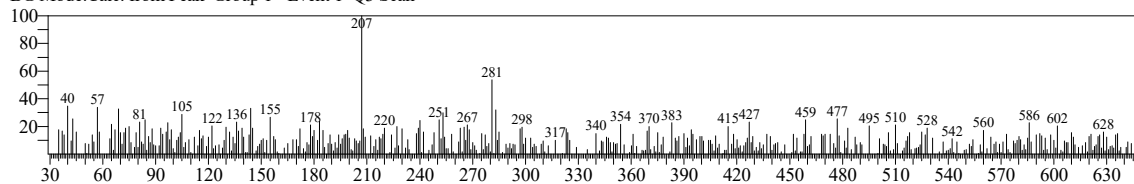

Hit#:1 Entry:484 Library:OA TMS\_DB5\_67min\_V3.lib

SI:23 Formula:C21H40O2Si CAS:60-33-3 MolWeight:352 RetIndex:2218

CompName:Linoleic acid-TMS ; octadeca-9,12-dienoic acid

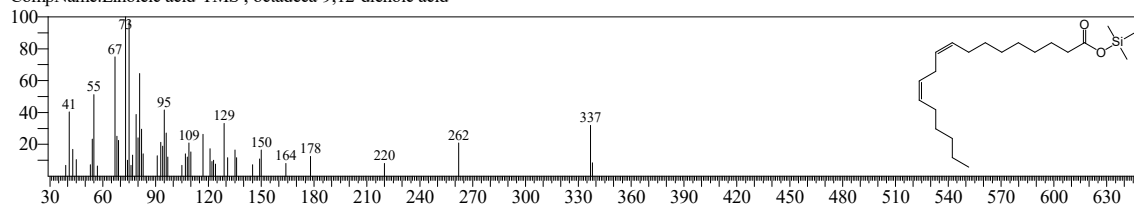

Hit#:2 Entry:485 Library:OA TMS\_DB5\_67min\_V3.lib

SI:23 Formula:C21H42O2Si CAS:112-80-1 MolWeight:354 RetIndex:2222

CompName:Oleic acid-TMS ; (Z)-octadec-9-enoic acid

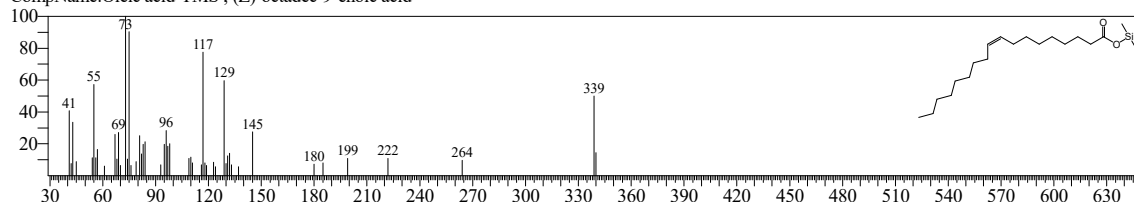

Hit#:3 Entry:310 Library:OA TMS\_DB5\_67min\_V3.lib

SI:22 Formula:C11H20N4OSi2 CAS:68-94-0 MolWeight:280 RetIndex:1822

CompName:Hypoxanthine-2TMS ; 3,7-dihydropurin-6-one

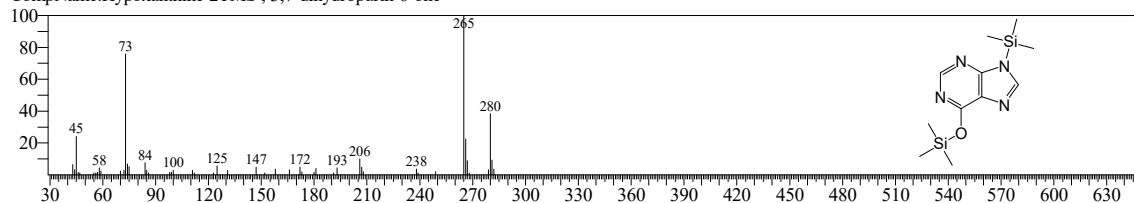

Hit#:4 Entry:405 Library:OA TMS\_DB5\_67min\_V3.lib

SI:22 Formula:C13H28N2O4Si2 CAS:2490-97-3 MolWeight:332 RetIndex:1948

CompName:N-Acetylglutamine-2TMS ; (2S)-2-acetamido-5-amino-5-oxopentanoic acid

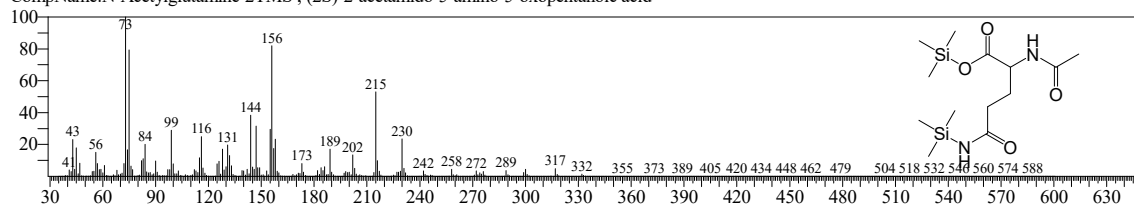

Hit#:5 Entry:558 Library:OA TMS\_DB5\_67min\_V3.lib

SI:22 Formula:C19H39N2O8PSi3 CAS:365-07-1 MolWeight:538 RetIndex:2905

CompName:Thymidine monophosphate-3TMS ; [(2R,3S,5R)-3-hydroxy-5-(5-methyl-2,4-dioxypyrimidin-1-yl)oxolan-2-yl]methyl dihydrogen phosph

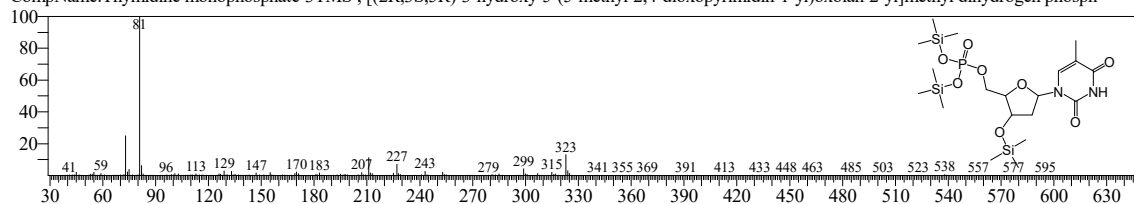

Supplement: Supplementary file 29 [file supplementary]
