# Supplementary material for: Comparative Metabolomics Profiling Reveals Key Metabolites and Associated Pathways Regulating Tuber Dormancy in White Yam (<em>Dioscorea rotundata</em>)
Source: Preprints.org preprint supplement (doi:10.20944/preprints202303.0378.v1), 2023-03-21

# TNAU

## Sample Information

Analyzed by : Admin  
 Analyzed : 04-Aug-22 8:48:23 PM  
 Sample Type : Unknown  
 Level # : 1  
 Sample Name : C56-3  
 Sample ID : C56-3  
 IS Amount : [1]=1  
 Sample Amount : 1  
 Dilution Factor : 1  
 Vial # : 7  
 Injection Volume : 1.00  
 Data File : D:\GCMS-8040NX\Aug 2022\Users\04.08.2022\Data files\04082022-007.qgd  
 Org Data File : D:\GCMS-8040NX\Aug 2022\Users\04.08.2022\Data files\04082022-007.qgd  
 Method File : D:\GCMS-8040NX\Aug 2022\Users\04.08.2022\Method file\27072022\_methodfile.qgm  
 Org Method File : D:\GCMS-8040NX\Aug 2022\Users\04.08.2022\Method file\27072022\_methodfile.qgm  
 Report File :  
 Tuning File : D:\GCMS-8040NX\Aug 2022\Tuning Data\TUNING 04082022.qgt  
 [Comment]  
 Jerry samples  
 Modified by : Admin  
 Modified : 05-Aug-22 4:23:03 PM

Chromatogram C56-3 D:\GCMS-8040NX\Aug 2022\Users\04.08.2022\Data files\04082022-007.qgd

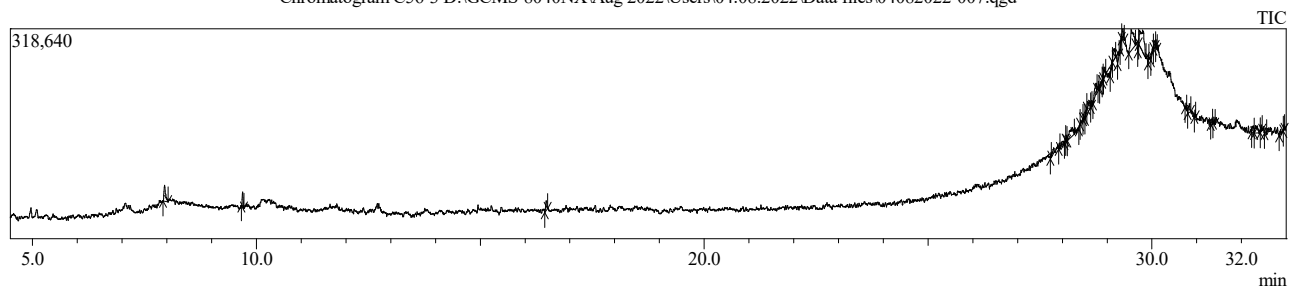

Peak Report TIC

| Peak# | R.Time | Area  | Area% | Height | Height% | A/H  | Similarity | Name                                          |
|-------|--------|-------|-------|--------|---------|------|------------|-----------------------------------------------|
| 1     | 7.948  | 61909 | 5.40  | 24017  | 4.89    | 2.58 | 86         | Decane                                        |
| 2     | 9.690  | 30853 | 2.69  | 22734  | 4.63    | 1.36 | 87         | Undecane                                      |
| 3     | 16.467 | 28864 | 2.52  | 14990  | 3.06    | 1.93 | 80         | 2,2,4-Trimethyl-1,3-pentanediol diisobutyrate |
| 4     | 27.745 | 7402  | 0.65  | 8659   | 1.76    | 0.85 | 27         | Galactose-5TMS(2)                             |
| 5     | 27.931 | 9469  | 0.83  | 9161   | 1.87    | 1.03 | 34         | Allose-5TMS                                   |
| 6     | 28.055 | 5414  | 0.47  | 6039   | 1.23    | 0.90 | 28         | Sucrose-8TMS                                  |
| 7     | 28.086 | 6708  | 0.59  | 9098   | 1.85    | 0.74 | 35         | Isomaltose-meto-8TMS(2)                       |
| 8     | 28.221 | 85719 | 7.48  | 13617  | 2.78    | 6.29 | 51         | Sucrose-8TMS                                  |
| 9     | 28.375 | 4169  | 0.36  | 3743   | 0.76    | 1.11 | 26         | 4-Hydroxybenzoic acid-2TMS                    |
| 10    | 28.405 | 4039  | 0.35  | 5232   | 1.07    | 0.77 | 26         | Ribose-4TMS(1)                                |
| 11    | 28.475 | 9561  | 0.83  | 7154   | 1.46    | 1.34 | 36         | Trehalose-8TMS                                |
| 12    | 28.535 | 11108 | 0.97  | 6099   | 1.24    | 1.82 | 36         | Trehalose-8TMS                                |
| 13    | 28.605 | 37331 | 3.26  | 10602  | 2.16    | 3.52 | 43         | Trehalose-8TMS                                |
| 14    | 28.646 | 7251  | 0.63  | 9788   | 1.99    | 0.74 | 29         | Ribose-4TMS(1)                                |
| 15    | 28.754 | 56676 | 4.95  | 14330  | 2.92    | 3.96 | 41         | Lactitol-9TMS                                 |
| 16    | 28.807 | 9074  | 0.79  | 11515  | 2.35    | 0.79 | 34         | 3-Hydroxybenzoic acid-2TMS                    |
| 17    | 28.855 | 10695 | 0.93  | 5831   | 1.19    | 1.83 | 27         | Glucose-5TMS(2)                               |
| 18    | 28.901 | 5911  | 0.52  | 9141   | 1.86    | 0.65 | 39         | Arabinose-4TMS(1)                             |
| 19    | 28.953 | 30313 | 2.64  | 12879  | 2.62    | 2.35 | 37         | Sucrose-8TMS                                  |
| 20    | 29.100 | 16641 | 1.45  | 10415  | 2.12    | 1.60 | 39         | Maltitol-9TMS                                 |
| 21    | 29.157 | 48547 | 4.24  | 16486  | 3.36    | 2.94 | 46         | Sucrose-8TMS                                  |
| 22    | 29.250 | 16830 | 1.47  | 10870  | 2.22    | 1.55 | 35         | 3-Hydroxybenzoic acid-2TMS                    |

# TNAU

| Peak# | R.Time | Area    | Area%  | Height | Height% | A/H  | Similarity | Name                            |
|-------|--------|---------|--------|--------|---------|------|------------|---------------------------------|
| 23    | 29.315 | 15784   | 1.38   | 11383  | 2.32    | 1.39 | 36         | Maltitol-9TMS                   |
| 24    | 29.353 | 26481   | 2.31   | 15787  | 3.22    | 1.68 | 49         | Trehalose-8TMS                  |
| 25    | 29.538 | 152483  | 13.30  | 32062  | 6.53    | 4.76 | 59         | Sucrose-8TMS                    |
| 26    | 29.690 | 8688    | 0.76   | 8546   | 1.74    | 1.02 | 33         | 1,5-Anhydro-glucitol-4TMS       |
| 27    | 29.792 | 195569  | 17.06  | 33121  | 6.75    | 5.90 | 60         | Sucrose-8TMS                    |
| 28    | 29.921 | 8251    | 0.72   | 11327  | 2.31    | 0.73 | 37         | Sucrose-8TMS                    |
| 29    | 30.010 | 18533   | 1.62   | 8613   | 1.76    | 2.15 | 27         | Ribose-4TMS(2)                  |
| 30    | 30.064 | 20114   | 1.75   | 10724  | 2.19    | 1.88 | 37         | Isomaltose-meto-8TMS(2)         |
| 31    | 30.091 | 12276   | 1.07   | 11956  | 2.44    | 1.03 | 47         | Sucrose-8TMS                    |
| 32    | 30.763 | 8677    | 0.76   | 9430   | 1.92    | 0.92 | 25         | 3-Hydroxy-kynurenine-3TMS       |
| 33    | 30.836 | 27755   | 2.42   | 13076  | 2.67    | 2.12 | 32         | Trehalose-8TMS                  |
| 34    | 30.964 | 7594    | 0.66   | 10433  | 2.13    | 0.73 | 36         | Fructose-5TMS(3)                |
| 35    | 31.329 | 10345   | 0.90   | 6917   | 1.41    | 1.50 | 40         | Inosine-4TMS                    |
| 36    | 31.385 | 9693    | 0.85   | 9775   | 1.99    | 0.99 | 23         | Hippuric acid-TMS               |
| 37    | 32.265 | 24875   | 2.17   | 10750  | 2.19    | 2.31 | 41         | Chloramphenicol-2TMS            |
| 38    | 32.310 | 44490   | 3.88   | 11625  | 2.37    | 3.83 | 34         | Boric acid-3TMS                 |
| 39    | 32.443 | 11069   | 0.97   | 9443   | 1.92    | 1.17 | 38         | Ribose-4TMS(4)                  |
| 40    | 32.528 | 15940   | 1.39   | 8889   | 1.81    | 1.79 | 46         | Epinephrine-3TMS                |
| 41    | 32.855 | 14777   | 1.29   | 5856   | 1.19    | 2.52 | 28         | 3,4-Dihydroxymandelic acid-4TMS |
| 42    | 32.947 | 8234    | 0.72   | 8535   | 1.74    | 0.96 | 32         | Maltitol-9TMS                   |
|       |        | 1146112 | 100.00 | 490648 | 100.00  |      |            |                                 |

## Library

<< Target >>

Line#:1 R.Time:7.945(Scan#:690) MassPeaks:288

RawMode:Averaged 7.940-7.950(689-691) BasePeak:57.10(5029)

BG Mode:Calc. from Peak Group 1 - Event 1 Q3 Scan

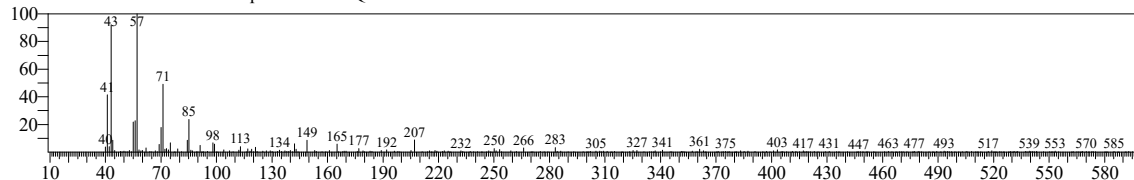

Hit#:1 Entry:9445 Library:NIST20R.lib

SI:86 Formula:C10H22 CAS:124-18-5 MolWeight:142 RetIndex:1000

CompName:Decane \$ n-Decane \$ n-C10H22 \$ UN 2247

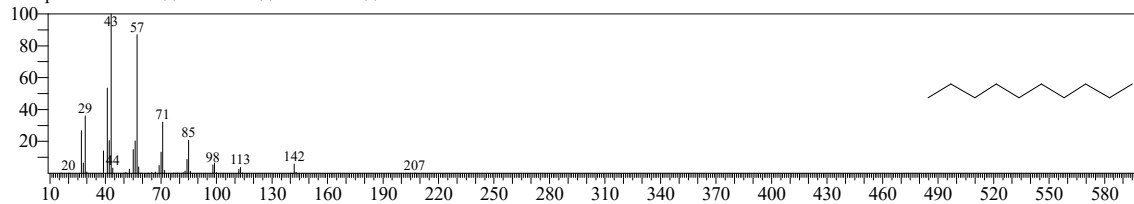

Hit#:2 Entry:12897 Library:NIST20R.lib

SI:85 Formula:C11H24 CAS:1120-21-4 MolWeight:156 RetIndex:1100

CompName:Undecane \$ n-Undecane \$ Hendecane \$ n-C11H24 \$ UN 2330

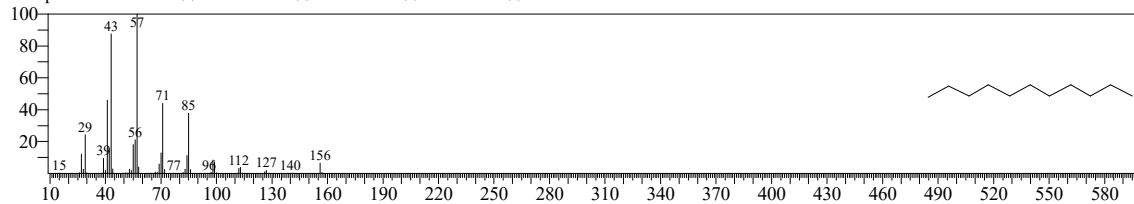

# TNAU

<< Target >>

Line#:1 R.Time:7.945(Scan#:690) MassPeaks:288

RawMode:Averaged 7.940-7.950(689-691) BasePeak:57.10(5029)

BG Mode:Calc. from Peak Group 1 - Event 1 Q3 Scan

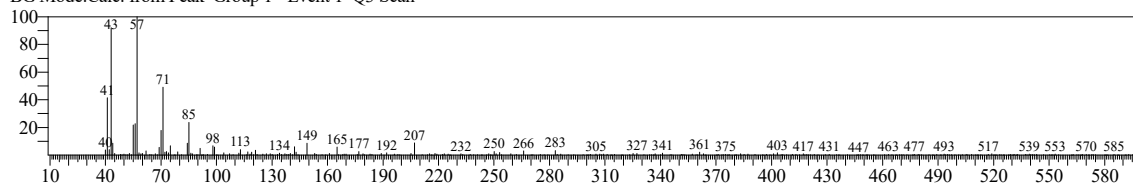

Hit#:3 Entry:40226 Library:NIST20M1.lib

SI:85 Formula:C<sub>13</sub>H<sub>28</sub> CAS:629-50-5 MolWeight:184 RetIndex:1300

CompName:Tridecane \$\$ n-Tridecane \$\$ Tridecane, n-

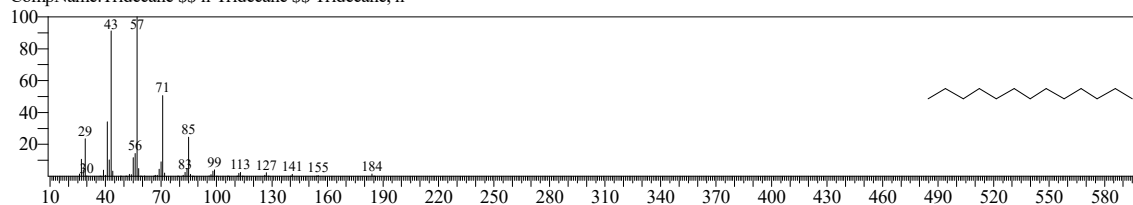

Hit#:4 Entry:16191 Library:NIST20R.lib

SI:85 Formula:C<sub>12</sub>H<sub>26</sub> CAS:112-40-3 MolWeight:170 RetIndex:1200

CompName:Dodecane \$\$ n-Dodecane \$\$ Adakane 12 \$\$ Ba 51-090453 \$\$ CH<sub>3</sub>(CH<sub>2</sub>)<sub>10</sub>CH<sub>3</sub> \$\$ Bihexyl \$\$ Dihexyl \$\$ Duodecane \$\$ NSC 8714

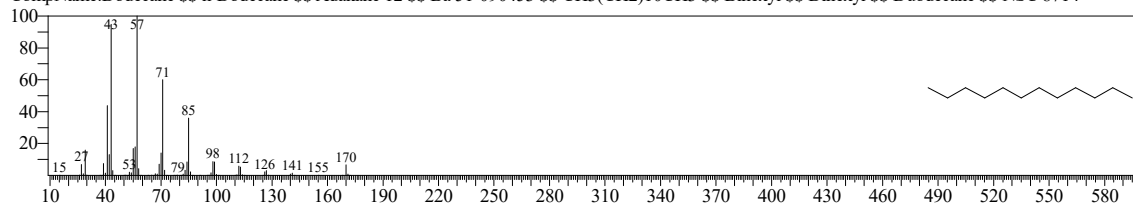

Hit#:5 Entry:159057 Library:NIST20M1.lib

SI:85 Formula:C<sub>21</sub>H<sub>44</sub> CAS:18344-37-1 MolWeight:296 RetIndex:1852

CompName:Heptadecane, 2,6,10,14-tetramethyl- \$\$ 2,6,10,14-Tetramethylheptadecane

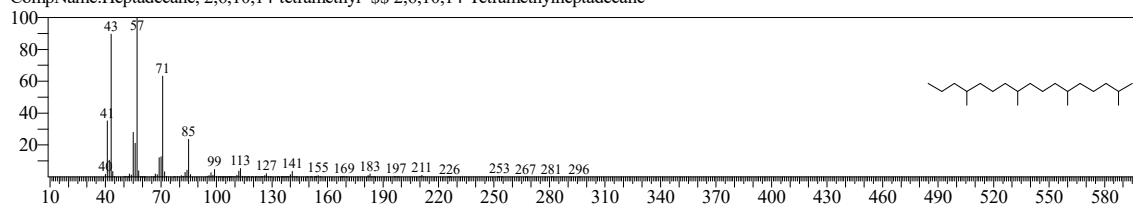

# TNAU

<< Target >>

Line# 2 R.Time: 9.690 (Scan#: 1039) MassPeaks: 253

RawMode: Averaged 9.685-9.695 (1038-1040) BasePeak: 57.05 (5911)

BG Mode: Calc. from Peak Group 1 - Event 1 Q3 Scan

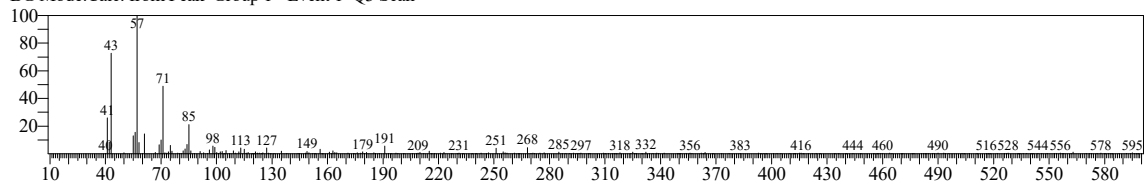

Hit#: 1 Entry: 21042 Library: NIST20M1.lib

SI: 87 Formula: C<sub>11</sub>H<sub>24</sub> CAS: 1120-21-4 MolWeight: 156 RetIndex: 1100

CompName: Undecane \$\$ n-Undecane \$\$ Hendecane \$\$ n-C<sub>11</sub>H<sub>24</sub> \$\$ UN 2330

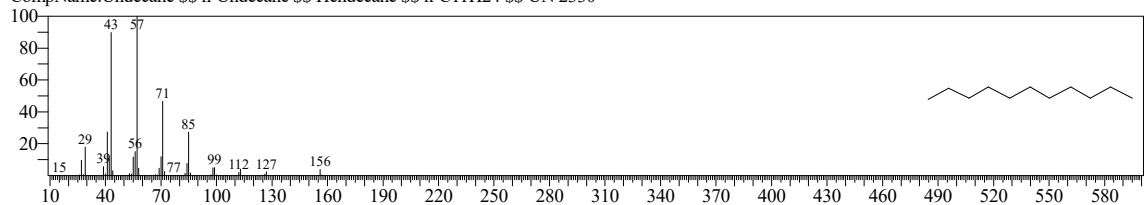

Hit#: 2 Entry: 40226 Library: NIST20M1.lib

SI: 87 Formula: C<sub>13</sub>H<sub>28</sub> CAS: 629-50-5 MolWeight: 184 RetIndex: 1300

CompName: Tridecane \$\$ n-Tridecane \$\$ Tridecane, n-

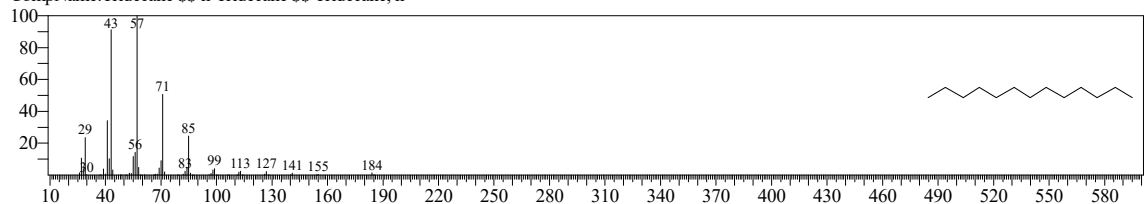

Hit#: 3 Entry: 27737 Library: NIST20R.lib

SI: 86 Formula: C<sub>16</sub>H<sub>34</sub> CAS: 544-76-3 MolWeight: 226 RetIndex: 1600

CompName: Hexadecane \$\$ n-Cetane \$\$ n-Hexadecane \$\$ Cetane

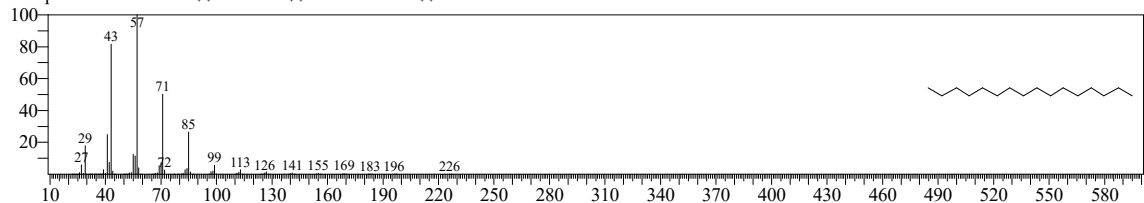

Hit#: 4 Entry: 16192 Library: NIST20R.lib

SI: 86 Formula: C<sub>12</sub>H<sub>26</sub> CAS: 112-40-3 MolWeight: 170 RetIndex: 1200

CompName: Dodecane \$\$ n-Dodecane \$\$ Adakane 12 \$\$ Ba 51-090453 \$\$ CH<sub>3</sub>(CH<sub>2</sub>)<sub>10</sub>CH<sub>3</sub> \$\$ Bihexyl \$\$ Dihexyl \$\$ Duodecane \$\$ NSC 8714

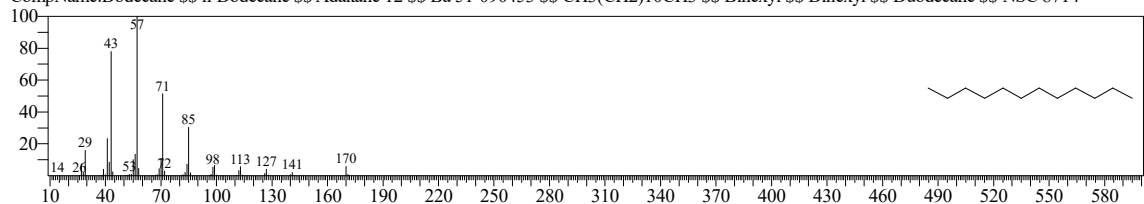

Hit#: 5 Entry: 40271 Library: NIST20M1.lib

SI: 86 Formula: C<sub>13</sub>H<sub>28</sub> CAS: 17312-82-2 MolWeight: 184 RetIndex: 1185

CompName: Undecane, 4,6-dimethyl- \$\$ 4,6-Dimethylundecane #

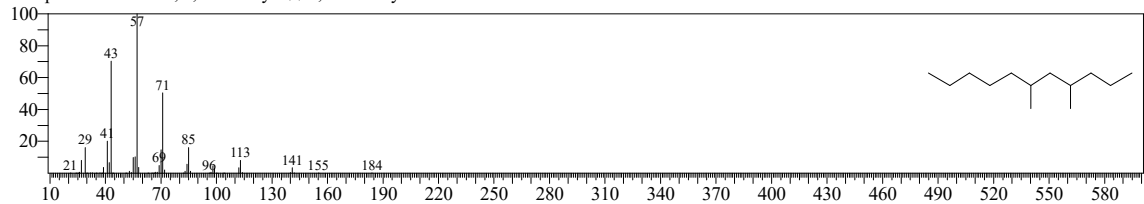

# TNAU

<< Target >>

Line#3 R.Time:16.465(Scan#:2394) MassPeaks:297

RawMode:Averaged 16.460-16.470(2393-2395) BasePeak:71.05(5004)

BG Mode:Calc. from Peak Group 1 - Event 1 Q3 Scan

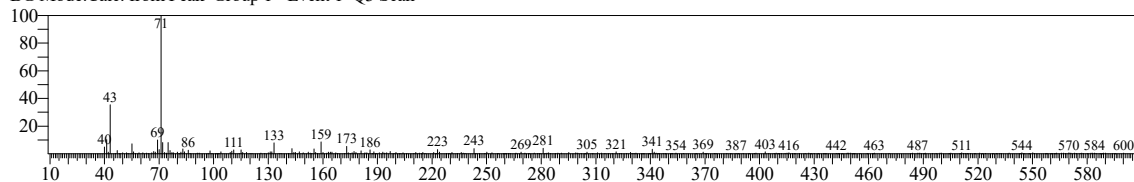

Hit#1 Entry:34622 Library:NIST20R.lib

SI:80 Formula:C16H30O4 CAS:6846-50-0 MolWeight:286 RetIndex:1605

CompName:2,2,4-Trimethyl-1,3-pentanediol diisobutyrate \$\$ Propanoic acid, 2-methyl-, 2,2-dimethyl-1-(1-methylethyl)-1,3-propanediyl ester \$\$ 1,3-Pentan

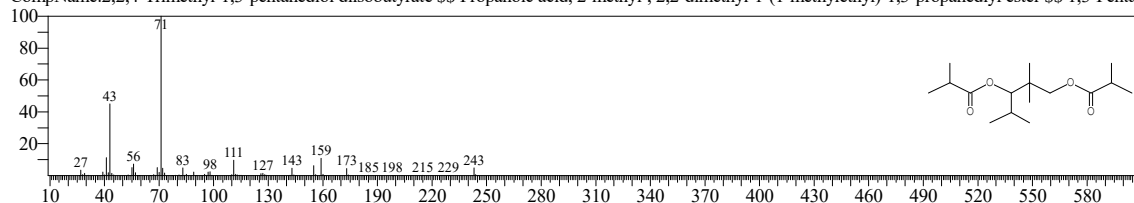

Hit#2 Entry:54692 Library:NIST20M1.lib

SI:74 Formula:C10H18O4 CAS:105-72-6 MolWeight:202 RetIndex:1350

CompName:Ethylene glycol di-n-butyrate \$\$ Butanoic acid, 1,2-ethanediyl ester \$\$ 2-(Butyryloxy)ethyl butyrate #

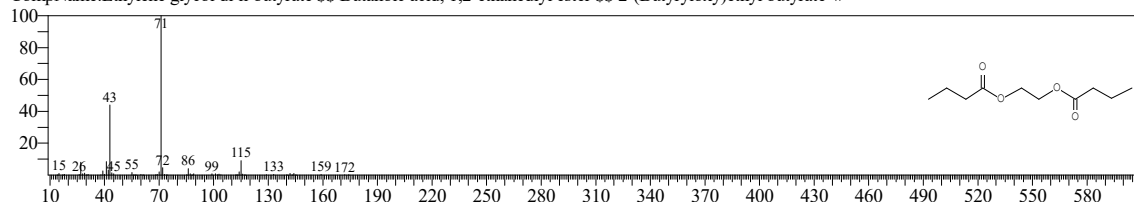

Hit#3 Entry:20598 Library:NIST20M1.lib

SI:74 Formula:C8H12O3 CAS:19680-00-3 MolWeight:156 RetIndex:1316

CompName:Tetrahydro[2,2']bifuranyl-5-one

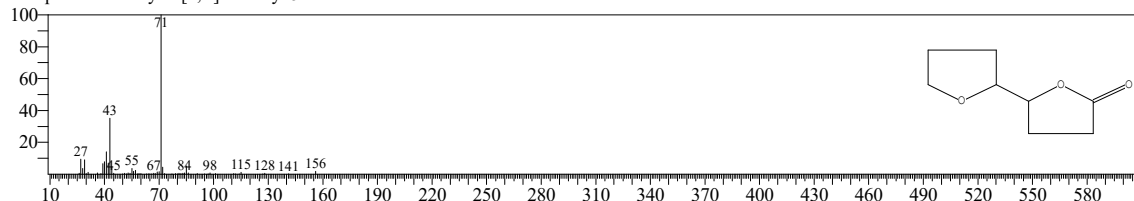

Hit#4 Entry:146809 Library:NIST20M1.lib

SI:74 Formula:C16H30O4 CAS:0-00-0 MolWeight:286 RetIndex:1605

CompName:Pentanoic acid, 2,2,4-trimethyl-3-carboxyisopropyl, isobutyl ester \$\$ 1-Isobutyl 4-isopropyl 3-isopropyl-2,2-dimethylsuccinate #

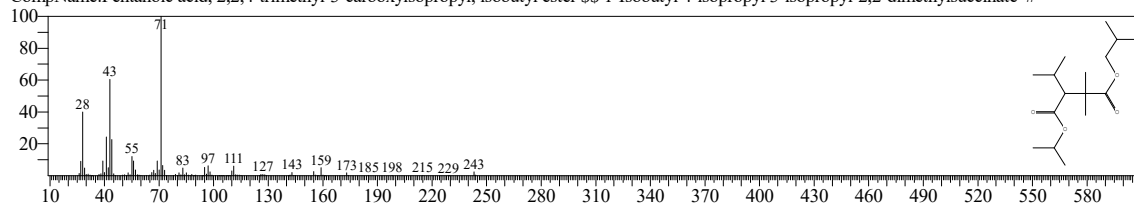

Hit#5 Entry:64203 Library:NIST20M1.lib

SI:73 Formula:C8H12N4O3 CAS:309735-27-1 MolWeight:212 RetIndex:1980

CompName:Furazan-3-carboxamide, 4-amino-N-(2-tetrahydrofurfuryl)- \$\$ 4-Amino-N-(tetrahydro-2-furanylmethyl)-1,2,5-oxadiazole-3-carboxamide #

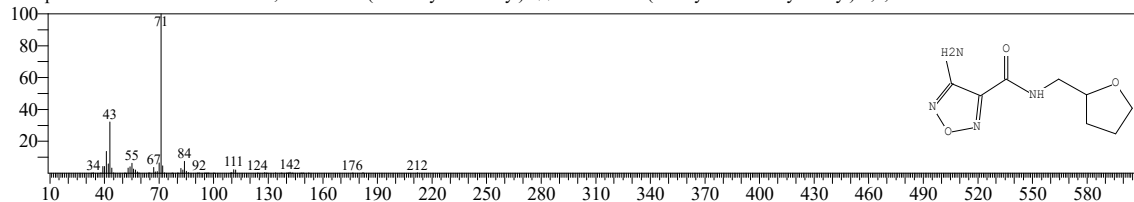

# TNAU

<< Target >>

Line#:4 R.Time:27.745(Scan#:4650) MassPeaks:296

RawMode:Averaged 27.740-27.750(4649-4651) BasePeak:208.05(610)

BG Mode:Calc. from Peak Group 1 - Event 1 Q3 Scan

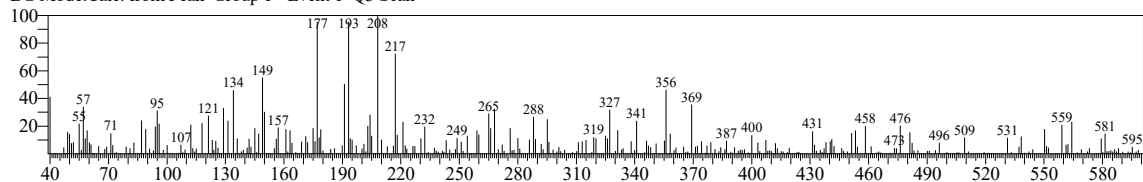

Hit#:1 Entry:345 Library:OA\_TMS\_DB5\_67min\_V3.lib

SI:27 Formula:C<sub>21</sub>H<sub>52</sub>O<sub>6</sub>Si<sub>5</sub> CAS:59-23-4 MolWeight:540 RetIndex:1868

CompName:Galactose-5TMS(2) ; (3R,4S,5R,6R)-6-(hydroxymethyl)oxane-2,3,4,5-tetrol

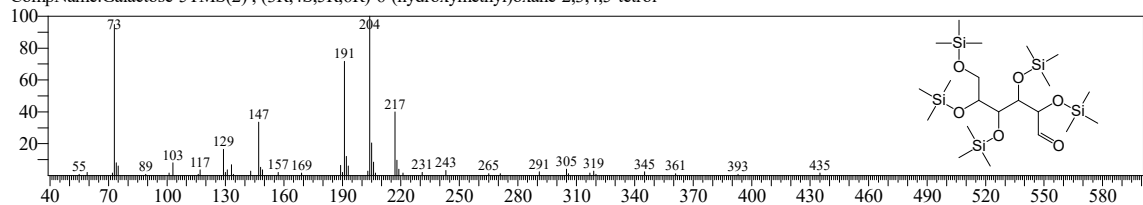

Hit#:2 Entry:386 Library:OA\_TMS\_DB5\_67min\_V3.lib

SI:26 Formula:C<sub>21</sub>H<sub>52</sub>O<sub>6</sub>Si<sub>5</sub> CAS:50-99-7 MolWeight:540 RetIndex:1922

CompName:Glucose-5TMS(1) ; (3R,4S,5S,6R)-6-(hydroxymethyl)oxane-2,3,4,5-tetrol

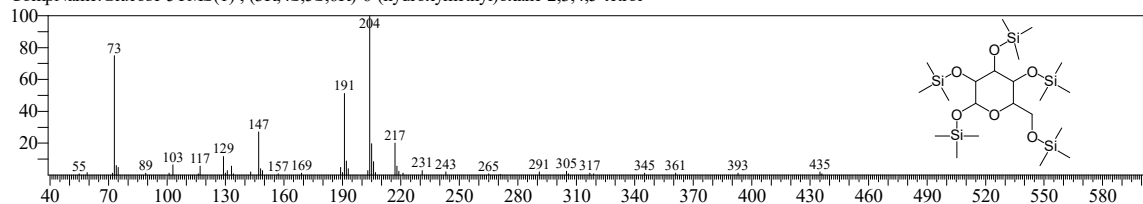

Hit#:3 Entry:348 Library:OA\_TMS\_DB5\_67min\_V3.lib

SI:26 Formula:C<sub>21</sub>H<sub>52</sub>O<sub>6</sub>Si<sub>5</sub> CAS:3458-28-4 MolWeight:540 RetIndex:1872

CompName:Mannose-5TMS(2) ; (3S,4S,5S,6R)-6-(hydroxymethyl)oxane-2,3,4,5-tetrol

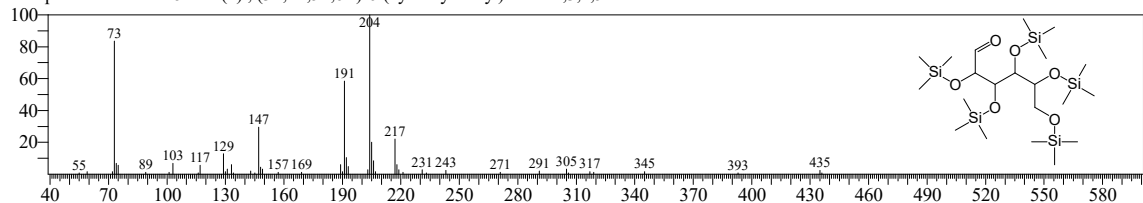

Hit#:4 Entry:349 Library:OA\_TMS\_DB5\_67min\_V3.lib

SI:25 Formula:C<sub>21</sub>H<sub>52</sub>O<sub>6</sub>Si<sub>5</sub> CAS:2595-97-3 MolWeight:540 RetIndex:1874

CompName:Allose-5TMS ; (2R,3R,4R,5R)-2,3,4,5,6-pentahydroxyhexanal

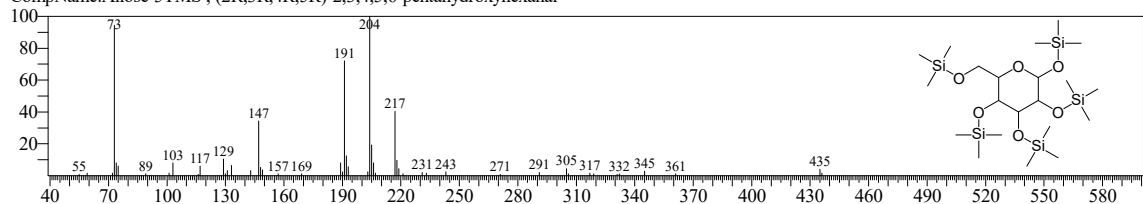

Hit#:5 Entry:252 Library:OA\_TMS\_DB5\_67min\_V3.lib

SI:25 Formula:C<sub>18</sub>H<sub>44</sub>O<sub>5</sub>Si<sub>4</sub> CAS:3615-37-0 MolWeight:452 RetIndex:1695

CompName:Fucose-4TMS(1) ; (2S,3R,4S,5R,6R)-6-methyloxane-2,3,4,5-tetrol

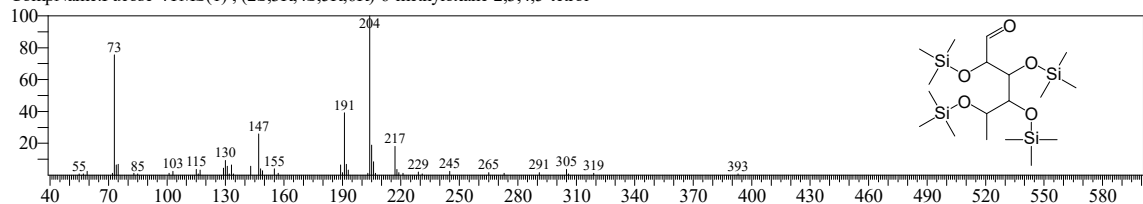

# TNAU

<< Target >>

Line#:5 R.Time:27.930(Scan#:4687) MassPeaks:297

RawMode:Averaged 27.925-27.935(4686-4688) BasePeak:207.05(927)

BG Mode:Calc. from Peak Group 1 - Event 1 Q3 Scan

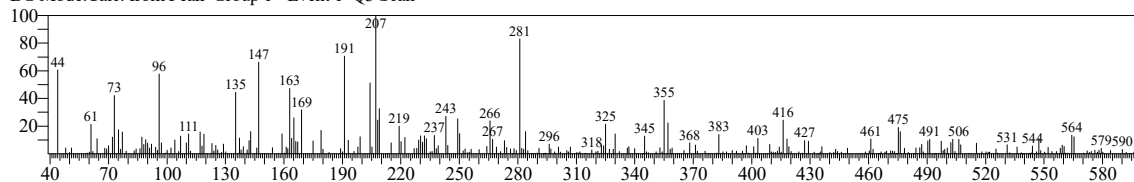

Hit#:1 Entry:349 Library:OA\_TMS\_DB5\_67min\_V3.lib

SI:34 Formula:C<sub>21</sub>H<sub>52</sub>O<sub>6</sub>Si<sub>5</sub> CAS:2595-97-3 MolWeight:540 RetIndex:1874

CompName:Allose-5TMS ; (2R,3R,4R,5R)-2,3,4,5,6-pentahydroxyhexanal

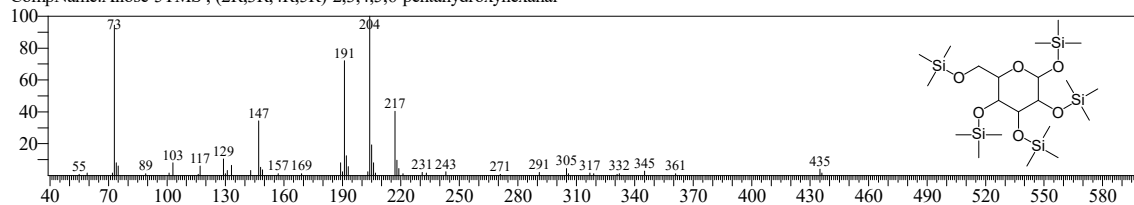

Hit#:2 Entry:345 Library:OA\_TMS\_DB5\_67min\_V3.lib

SI:34 Formula:C<sub>21</sub>H<sub>52</sub>O<sub>6</sub>Si<sub>5</sub> CAS:59-23-4 MolWeight:540 RetIndex:1868

CompName:Galactose-5TMS(2) ; (3R,4S,5R,6R)-6-(hydroxymethyl)oxane-2,3,4,5-tetrol

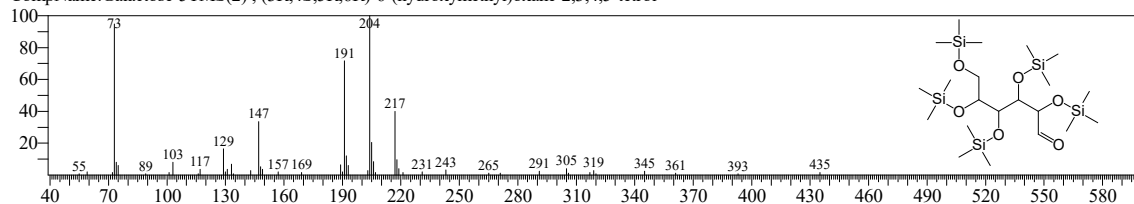

Hit#:3 Entry:295 Library:OA\_TMS\_DB5\_67min\_V3.lib

SI:34 Formula:C<sub>17</sub>H<sub>42</sub>O<sub>5</sub>Si<sub>4</sub> CAS:58-86-6 MolWeight:438 RetIndex:1784

CompName:Xylose-4TMS(2) ; (2R,3S,4R)-2,3,4,5-tetrahydroxypentanal

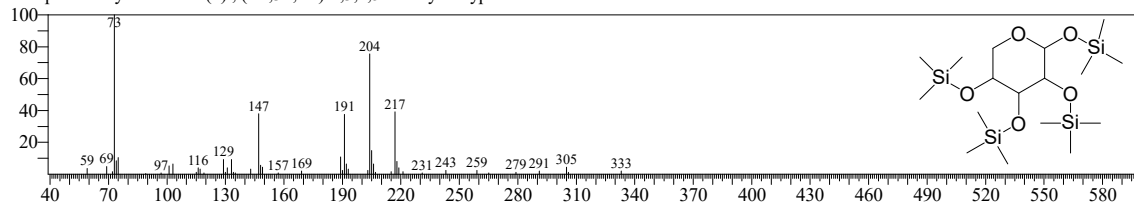

Hit#:4 Entry:437 Library:OA\_TMS\_DB5\_67min\_V3.lib

SI:33 Formula:C<sub>21</sub>H<sub>52</sub>O<sub>6</sub>Si<sub>5</sub> CAS:50-99-7 MolWeight:540 RetIndex:2002

CompName:Glucose-5TMS(2) ; (3R,4S,5S,6R)-6-(hydroxymethyl)oxane-2,3,4,5-tetrol

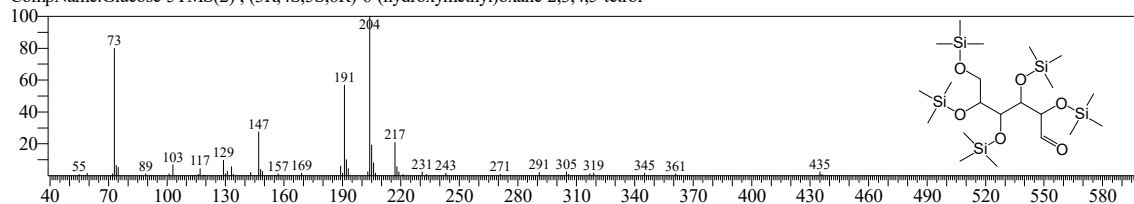

Hit#:5 Entry:382 Library:OA\_TMS\_DB5\_67min\_V3.lib

SI:33 Formula:C<sub>18</sub>H<sub>34</sub>O<sub>4</sub>Si<sub>3</sub> CAS:6482-98-0 MolWeight:398 RetIndex:1918

CompName:4-Hydroxyphenyllactic acid-3TMS ; 2-hydroxy-3-(4-hydroxyphenyl)propanoate

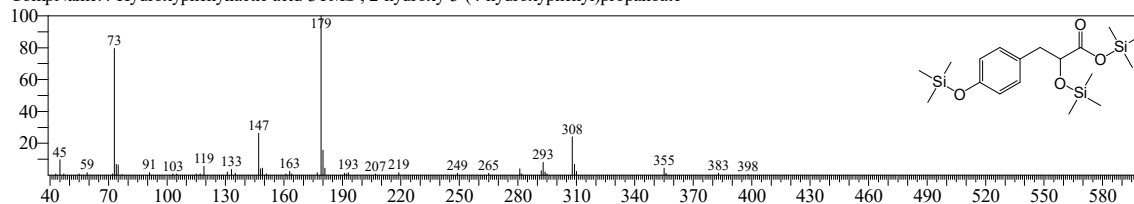

# TNAU

<< Target >>

Line#:6 R.Time:28.055(Scan#:4712) MassPeaks:276

RawMode:Averaged 28.050-28.060(4711-4713) BasePeak:281.00(901)

BG Mode:Calc. from Peak Group 1 - Event 1 Q3 Scan

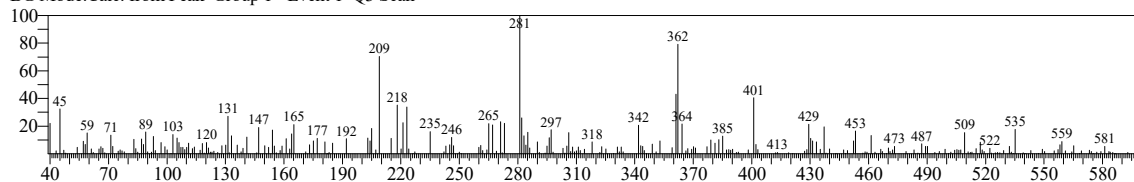

Hit#:1 Entry:541 Library:OA\_TMS\_DB5\_67min\_V3.lib

SI:28 Formula:C36H86O11Si8 CAS:57-50-1 MolWeight:918 RetIndex:2705

CompName:Sucrose-8TMS ; (2R,3R,4S,5S,6R)-2-[(2S,3S,4S,5R)-3,4-dihydroxy-2,5-bis(hydroxymethyl)oxolan-2-yl]oxy-6-(hydroxymethyl)oxane-3

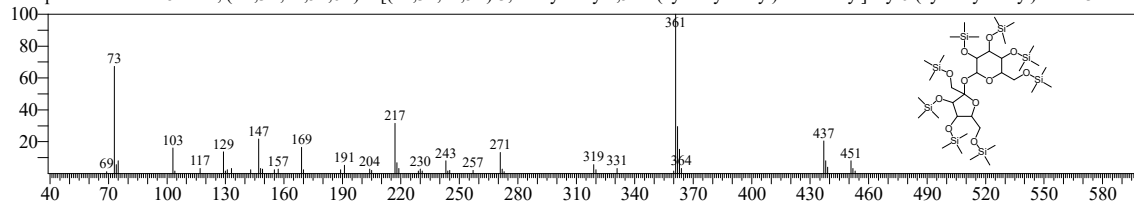

Hit#:2 Entry:560 Library:OA\_TMS\_DB5\_67min\_V3.lib

SI:27 Formula:C37H89NO11Si8 CAS:499-40-1 MolWeight:947 RetIndex:2947

CompName:Isomaltose-meto-8TMS(1) ; (3R,4S,5S,6R)-6-[(2S,3R,4S,5S,6R)-3,4,5-trihydroxy-6-(hydroxymethyl)oxan-2-yl]oxymethyl]oxane-2,3,

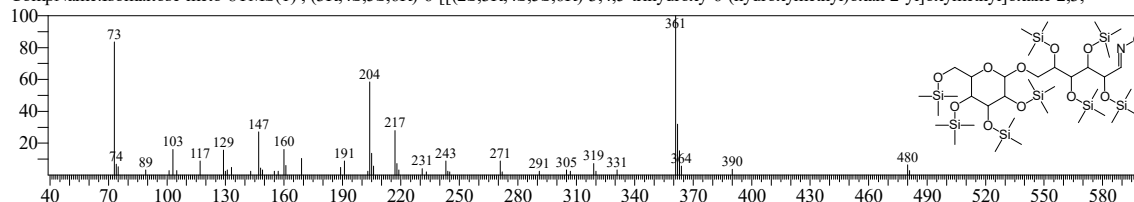

Hit#:3 Entry:552 Library:OA\_TMS\_DB5\_67min\_V3.lib

SI:26 Formula:C36H86O11Si8 CAS:99-20-7 MolWeight:918 RetIndex:2812

CompName:Trehalose-8TMS ; (2R,3S,4S,5R,6R)-2-(hydroxymethyl)-6-[(2R,3R,4S,5S,6R)-3,4,5-trihydroxy-6-(hydroxymethyl)oxan-2-yl]oxyoxane-

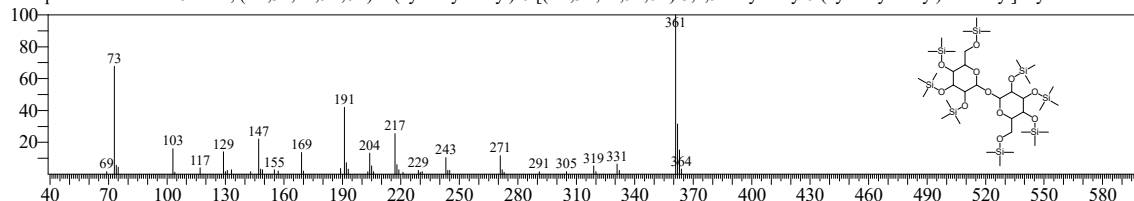

Hit#:4 Entry:211 Library:OA\_TMS\_DB5\_67min\_V3.lib

SI:26 Formula:C13H22O3Si2 CAS:99-96-7 MolWeight:282 RetIndex:1636

CompName:4-Hydroxybenzoic acid-2TMS ; 4-hydroxybenzoic acid

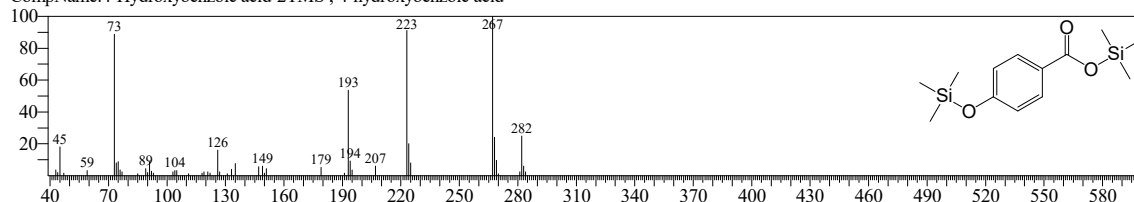

Hit#:5 Entry:359 Library:OA\_TMS\_DB5\_67min\_V3.lib

SI:25 Formula:C18H34O5Si3 CAS:55-10-7 MolWeight:414 RetIndex:1894

CompName:Vanilmandelic acid-3TMS ; 2-hydroxy-2-(4-hydroxy-3-methoxyphenyl)acetic acid

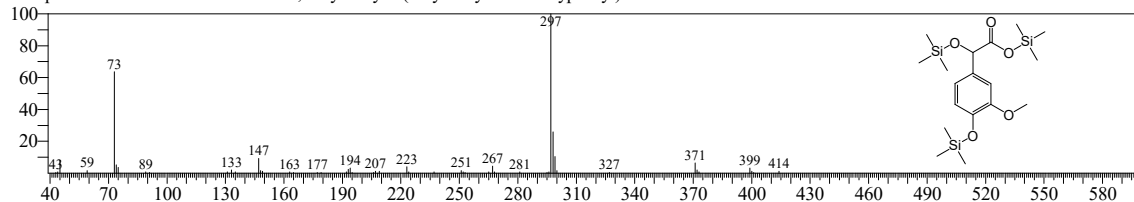



# TNAU

<< Target >>

Line#:7 R.Time:28.085(Scan#:4718) MassPeaks:283

RawMode:Averaged 28.080-28.090(4717-4719) BasePeak:207.05(1059)

BG Mode:Calc. from Peak Group 1 - Event 1 Q3 Scan

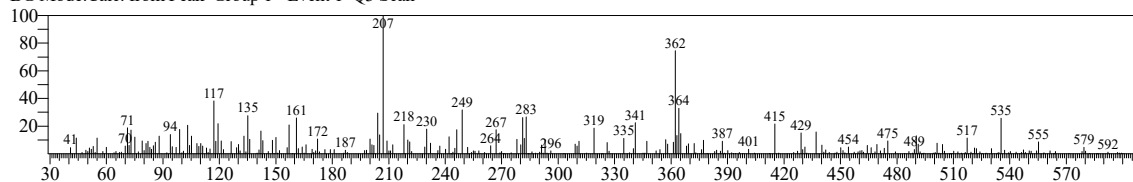

Hit#:1 Entry:561 Library:OA\_TMS\_DB5\_67min\_V3.lib

SI:35 Formula:C37H89NO11Si8 CAS:499-40-1 MolWeight:947 RetIndex:2983

CompName:Isomaltose-meto-8TMS(2); (3R,4S,5S,6R)-6-[(2S,3R,4S,5S,6R)-3,4,5-trihydroxy-6-(hydroxymethyl)oxan-2-yl]oxymethyl]oxane-2,3,

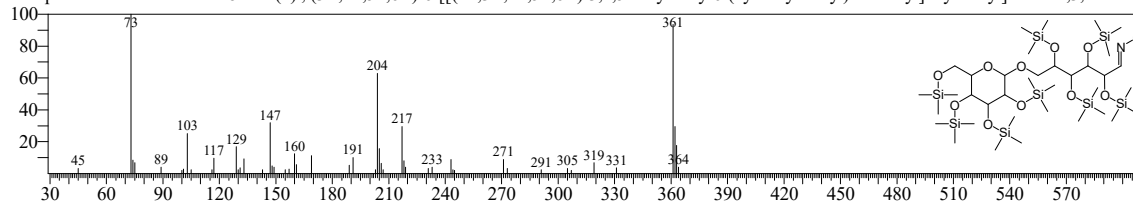

Hit#:2 Entry:77 Library:OA\_TMS\_DB5\_67min\_V3.lib

SI:32 Formula:C12H32O3Si3 CAS:56-81-5 MolWeight:308 RetIndex:1279

CompName:Glycerol-3TMS; propane-1,2,3-triol

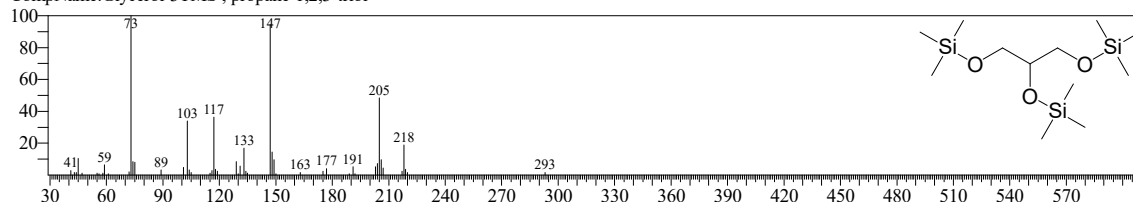

Hit#:3 Entry:539 Library:OA\_TMS\_DB5\_67min\_V3.lib

SI:32 Formula:C27H60O3Si2 CAS:544-62-7 MolWeight:488 RetIndex:2684

CompName:Butyl alcohol-2TMS; 3-octadecyloxypropane-1,2-diol

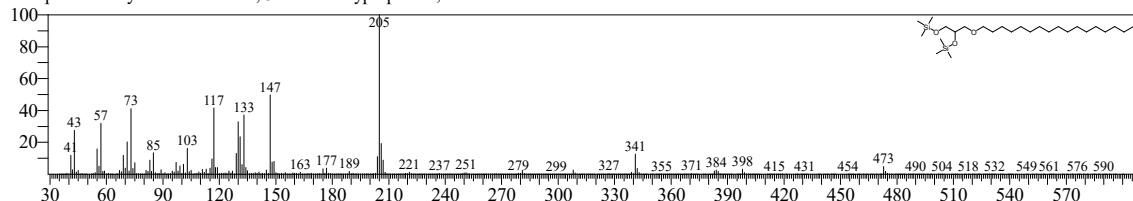

Hit#:4 Entry:305 Library:OA\_TMS\_DB5\_67min\_V3.lib

SI:31 Formula:C19H47NO5Si4 CAS:154-17-6 MolWeight:481 RetIndex:1814

CompName:2-Deoxy-glucose-meto-4TMS; (2S,4S,5S,6S)-6-(hydroxymethyl)oxane-2,4,5-triol

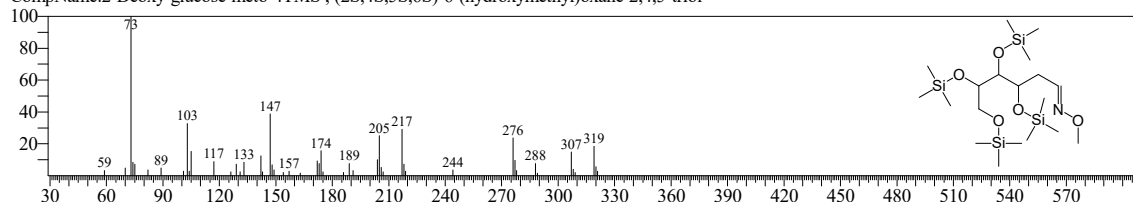

Hit#:5 Entry:553 Library:OA\_TMS\_DB5\_67min\_V3.lib

SI:31 Formula:C37H89NO11Si8 CAS:69-79-4 MolWeight:947 RetIndex:2817

CompName:Maltose-meto-8TMS(1); (2R,3S,4S,5R,6R)-2-(hydroxymethyl)-6-[(2R,3S,4R,5R,6R)-4,5,6-trihydroxy-2-(hydroxymethyl)oxan-3-yl]oxy

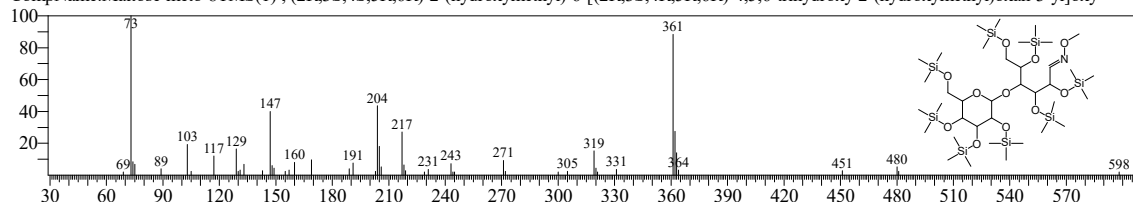

# TNAU

<< Target >>

Line#8 R.Time:28.220(Scan#:4745) MassPeaks:307

RawMode:Averaged 28.215-28.225(4744-4746) BasePeak:217.15(1627)

BG Mode:Calc. from Peak Group 1 - Event 1 Q3 Scan

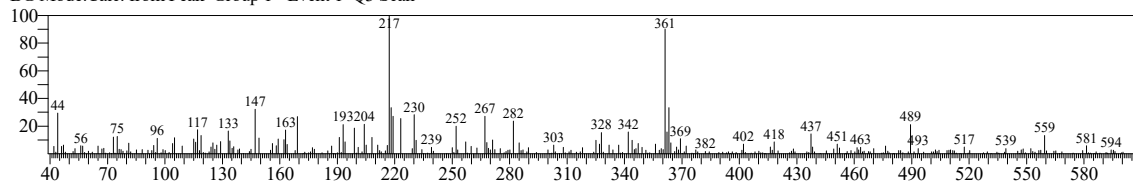

Hit#1 Entry:541 Library:OA\_TMS\_DB5\_67min\_V3.lib

SI:51 Formula:C36H86O11Si8 CAS:57-50-1 MolWeight:918 RetIndex:2705

CompName:Sucrose-8TMS ; (2R,3R,4S,5S,6R)-2-[(2S,3S,4S,5R)-3,4-dihydroxy-2,5-bis(hydroxymethyl)oxolan-2-yl]oxy-6-(hydroxymethyl)oxane-3

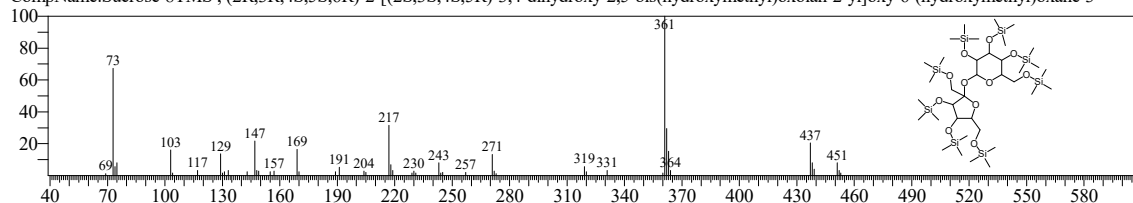

Hit#2 Entry:561 Library:OA\_TMS\_DB5\_67min\_V3.lib

SI:50 Formula:C37H89NO11Si8 CAS:499-40-1 MolWeight:947 RetIndex:2983

CompName:Isomaltose-meto-8TMS(2) ; (3R,4S,5S,6R)-6-[[[(2S,3R,4S,5S,6R)-3,4,5-trihydroxy-6-(hydroxymethyl)oxan-2-yl]oxymethyl]oxane-2,3,

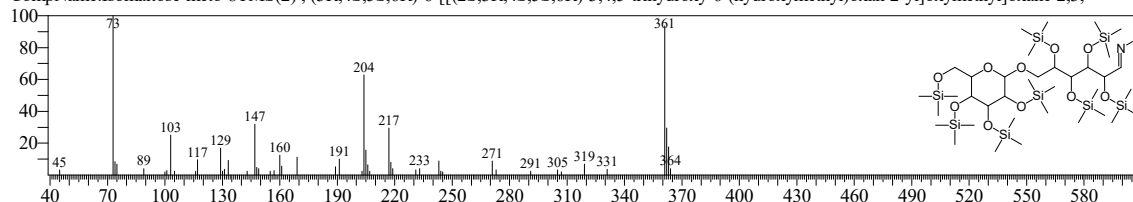

Hit#3 Entry:552 Library:OA\_TMS\_DB5\_67min\_V3.lib

SI:50 Formula:C36H86O11Si8 CAS:99-20-7 MolWeight:918 RetIndex:2812

CompName:Trehalose-8TMS ; (2R,3S,4S,5R,6R)-2-(hydroxymethyl)-6-[(2R,3R,4S,5S,6R)-3,4,5-trihydroxy-6-(hydroxymethyl)oxan-2-yl]oxyoxane-

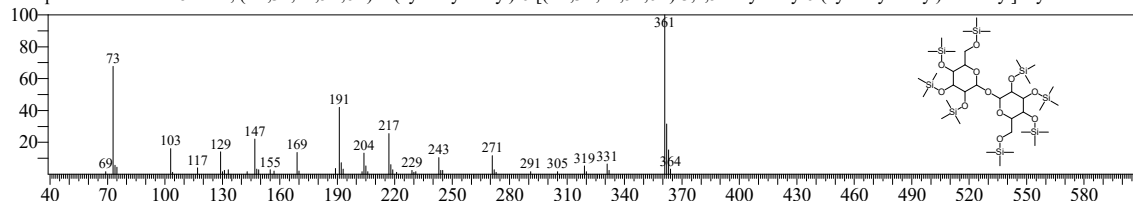

Hit#4 Entry:559 Library:OA\_TMS\_DB5\_67min\_V3.lib

SI:50 Formula:C39H96O11Si9 CAS:585-88-6 MolWeight:992 RetIndex:2923

CompName:Maltitol-9TMS ; (2S,3R,4R,5R)-4-[(2R,3R,4S,5S,6R)-3,4,5-trihydroxy-6-(hydroxymethyl)oxan-2-yl]oxyhexane-1,2,3,5,6-pentol

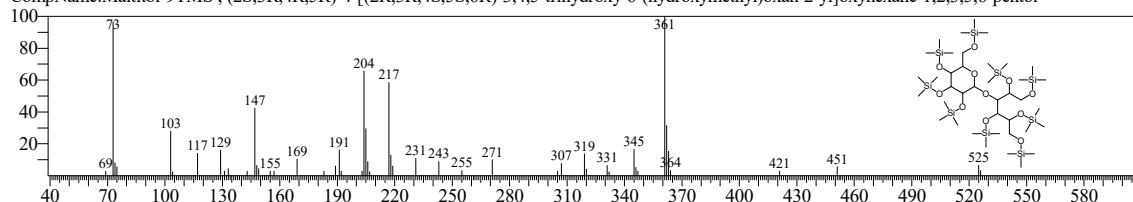

Hit#5 Entry:553 Library:OA\_TMS\_DB5\_67min\_V3.lib

SI:49 Formula:C37H89NO11Si8 CAS:69-79-4 MolWeight:947 RetIndex:2817

CompName:Maltose-meto-8TMS(1) ; (2R,3S,4S,5R,6R)-2-(hydroxymethyl)-6-[(2R,3S,4R,5R,6R)-4,5,6-trihydroxy-2-(hydroxymethyl)oxan-3-yl]oxy

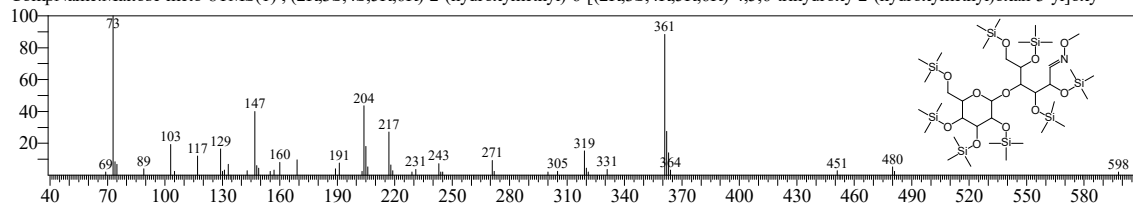

# TNAU

<< Target >>

Line#:9 R.Time:28.375(Scan#:4776) MassPeaks:260

RawMode:Averaged 28.370-28.380(4775-4777) BasePeak:208.05(727)

BG Mode:Calc. from Peak Group 1 - Event 1 Q3 Scan

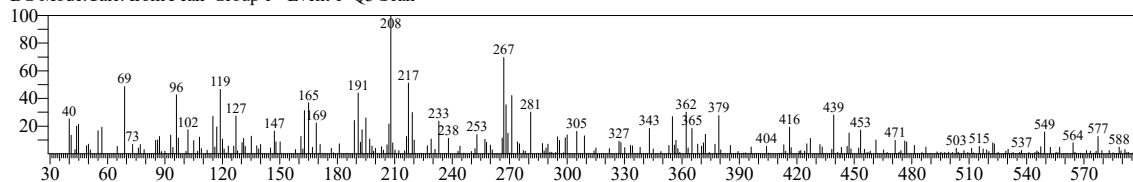

Hit#:1 Entry:211 Library:OA\_TMS\_DB5\_67min\_V3.lib

SI:26 Formula:C13H22O3Si2 CAS:99-96-7 MolWeight:282 RetIndex:1636

CompName:4-Hydroxybenzoic acid-2TMS ; 4-hydroxybenzoic acid

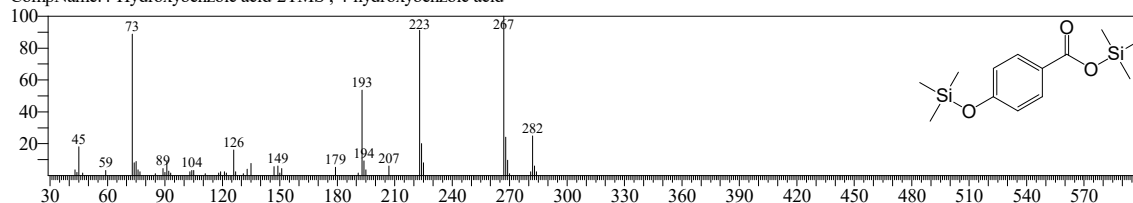

Hit#:2 Entry:179 Library:OA\_TMS\_DB5\_67min\_V3.lib

SI:26 Formula:C13H22O3Si2 CAS:99-06-9 MolWeight:282 RetIndex:1572

CompName:3-Hydroxybenzoic acid-2TMS ; 3-hydroxybenzoic acid

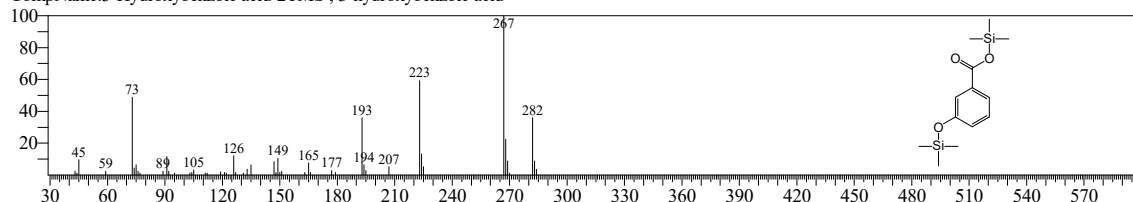

Hit#:3 Entry:315 Library:OA\_TMS\_DB5\_67min\_V3.lib

SI:23 Formula:C16H30O4Si3 CAS:99-50-3 MolWeight:370 RetIndex:1833

CompName:Protocatechuic acid-3TMS ; 3,4-dihydroxybenzoic acid

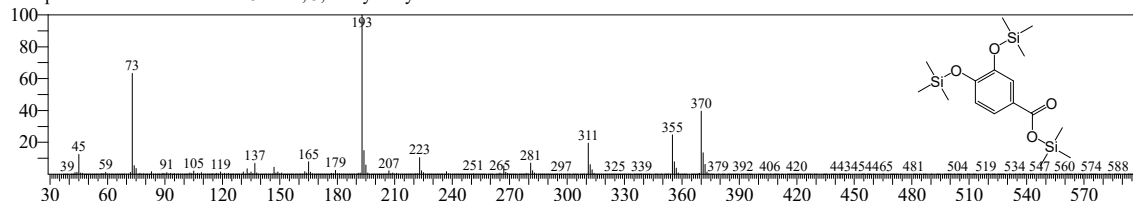

Hit#:4 Entry:341 Library:OA\_TMS\_DB5\_67min\_V3.lib

SI:23 Formula:C18H34O4Si3 CAS:3247-75-4 MolWeight:398 RetIndex:1864

CompName:3-(3-Hydroxyphenyl)-3-hydroxypropionic acid-3TMS ; 3-hydroxy-3-(3-hydroxyphenyl)propanoic acid

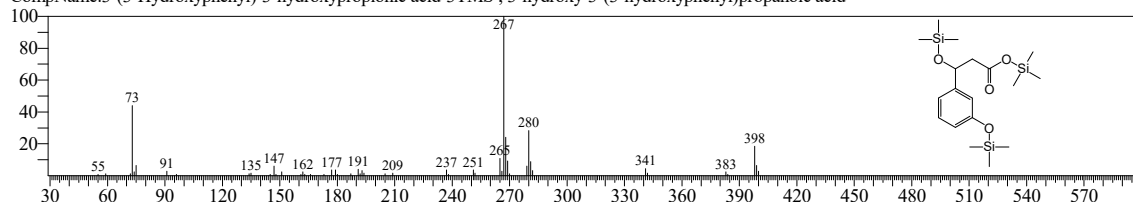

Hit#:5 Entry:150 Library:OA\_TMS\_DB5\_67min\_V3.lib

SI:23 Formula:C15H26O3Si2 CAS:515-30-0 MolWeight:310 RetIndex:1517

CompName:2-Phenyllactic acid-2TMS ; 2-hydroxy-3-phenylpropanoic acid

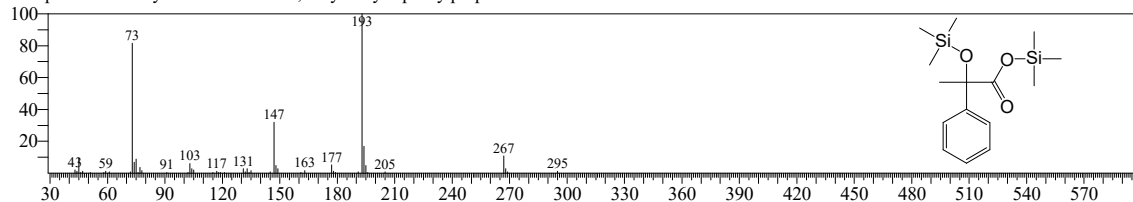

# TNAU

<< Target >>

Line#:10 R.Time:28.405(Scan#:4782) MassPeaks:285

RawMode:Averaged 28.400-28.410(4781-4783) BasePeak:217.10(677)

BG Mode:Calc. from Peak Group 1 - Event 1 Q3 Scan

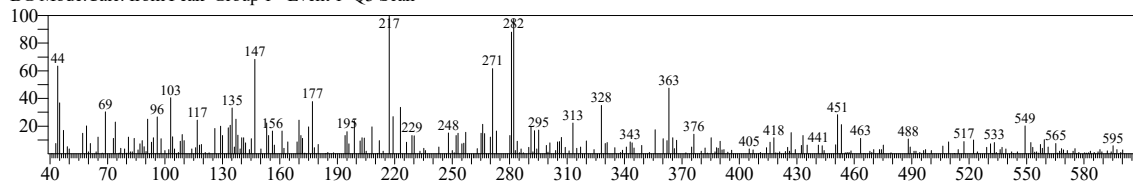

Hit#:1 Entry:227 Library:OA\_TMS\_DB5\_67min\_V3.lib

SI:26 Formula:C17H42O5Si4 CAS:50-69-1 MolWeight:438 RetIndex:1657

CompName:Ribose-4TMS(1) ; (3R,4S,5R)-5-(hydroxymethyl)oxolane-2,3,4-triol

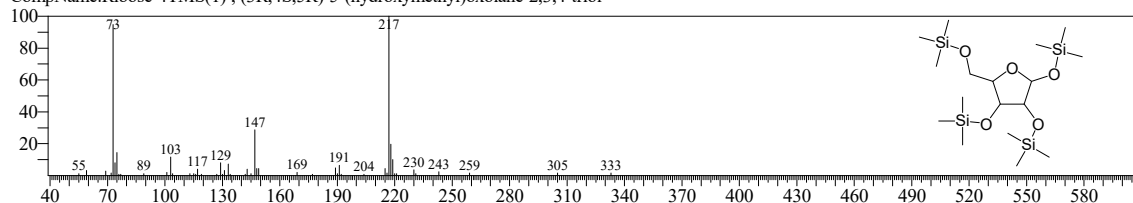

Hit#:2 Entry:326 Library:OA\_TMS\_DB5\_67min\_V3.lib

SI:26 Formula:C21H52O6Si5 CAS:23140-52-5 MolWeight:540 RetIndex:1841

CompName:Psicose-5TMS(2) ; (3R,4R,5R)-1,3,4,5,6-pentahydroxyhexan-2-one

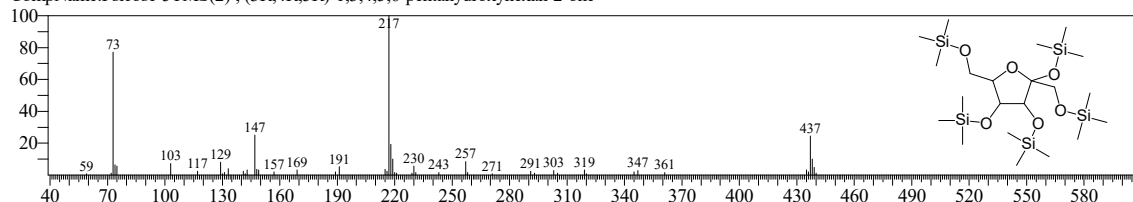

Hit#:3 Entry:30 Library:OA\_TMS\_DB5\_67min\_V3.lib

SI:25 Formula:C9H22O3Si2 CAS:503-66-2 MolWeight:234 RetIndex:1145

CompName:3-Hydroxypropionic acid-2TMS ; 3-hydroxypropanoic acid

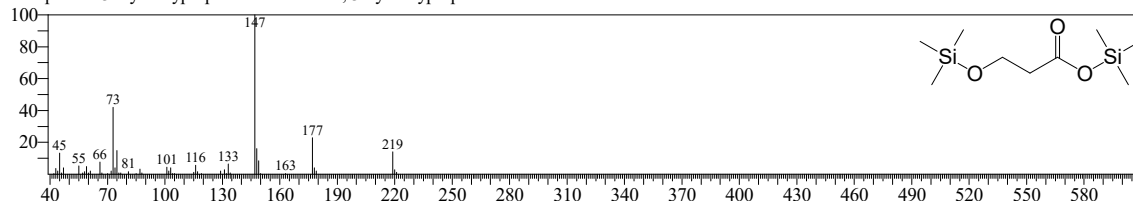

Hit#:4 Entry:80 Library:OA\_TMS\_DB5\_67min\_V3.lib

SI:25 Formula:C11H24O4Si2 CAS:601-75-2 MolWeight:276 RetIndex:1284

CompName:Ethylmalonic acid-2TMS ; 2-ethylpropanedioic acid

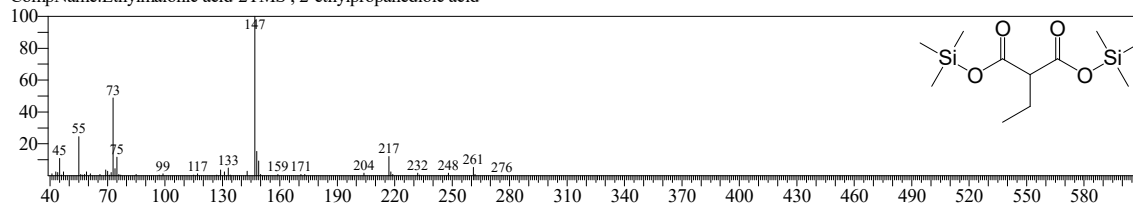

Hit#:5 Entry:13 Library:OA\_TMS\_DB5\_67min\_V3.lib

SI:25 Formula:C8H20O3Si2 CAS:79-14-1 MolWeight:220 RetIndex:1074

CompName:Glycolic acid-2TMS ; 2-hydroxyacetic acid

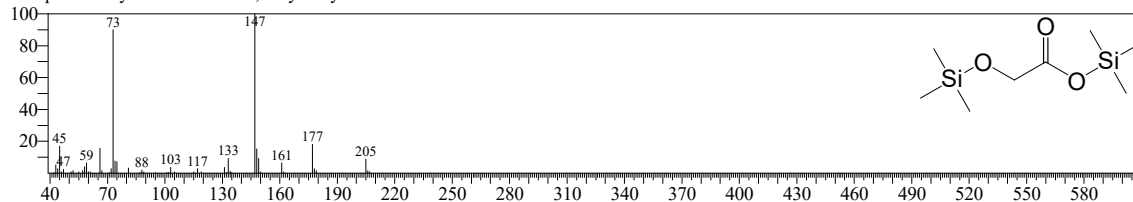

&lt;&lt; Target &gt;&gt;

Line#:11 R.Time:28.475(Scan#:4796) MassPeaks:293

RawMode:Averaged 28.470-28.480(4795-4797) BasePeak:361.20(1451)

BG Mode:Calc. from Peak Group 1 - Event 1 Q3 Scan

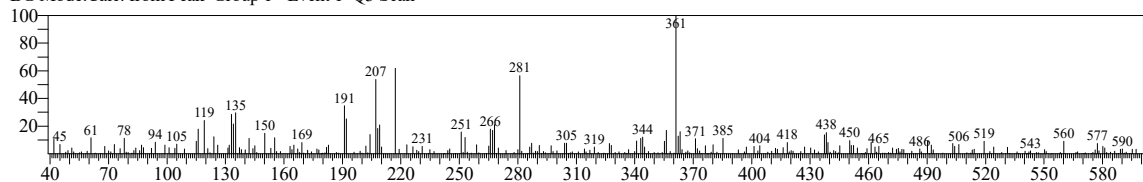

Hit#:1 Entry:552 Library:OA\_TMS\_DB5\_67min\_V3.lib

SI:36 Formula:C36H86O11Si8 CAS:99-20-7 MolWeight:918 RetIndex:2812

CompName:Trehalose-8TMS ; (2R,3S,4S,5R,6R)-2-(hydroxymethyl)-6-[(2R,3R,4S,5S,6R)-3,4,5-trihydroxy-6-(hydroxymethyl)oxan-2-yl]oxyoxane-

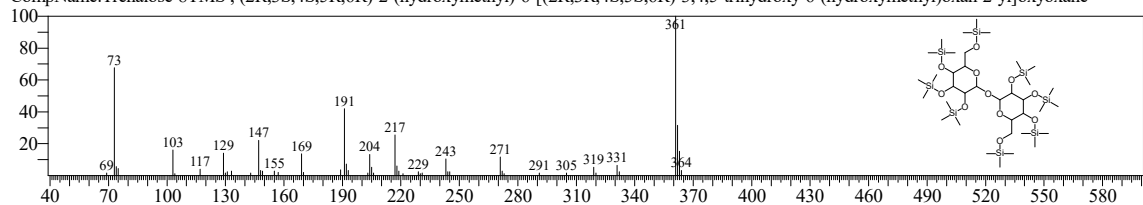

Hit#:2 Entry:559 Library:OA\_TMS\_DB5\_67min\_V3.lib

SI:35 Formula:C39H96O11Si9 CAS:585-88-6 MolWeight:992 RetIndex:2923

CompName:Maltitol-9TMS ; (2S,3R,4R,5R)-4-[(2R,3R,4S,5S,6R)-3,4,5-trihydroxy-6-(hydroxymethyl)oxan-2-yl]oxyhexane-1,2,3,5,6-pentol

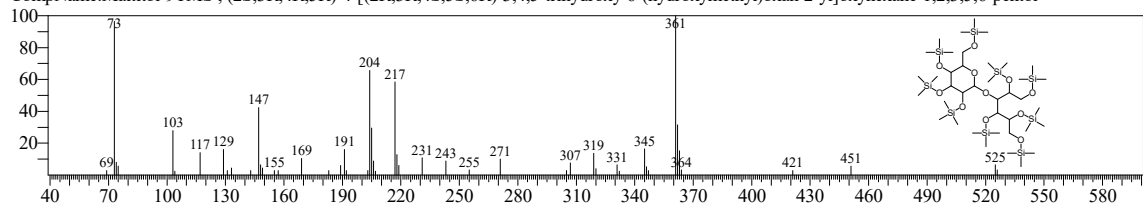

Hit#:3 Entry:541 Library:OA\_TMS\_DB5\_67min\_V3.lib

SI:35 Formula:C36H86O11Si8 CAS:57-50-1 MolWeight:918 RetIndex:2705

CompName:Sucrose-8TMS ; (2R,3R,4S,5S,6R)-2-[(2S,3S,4S,5R)-3,4-dihydroxy-2,5-bis(hydroxymethyl)oxolan-2-yl]oxy-6-(hydroxymethyl)oxane-3

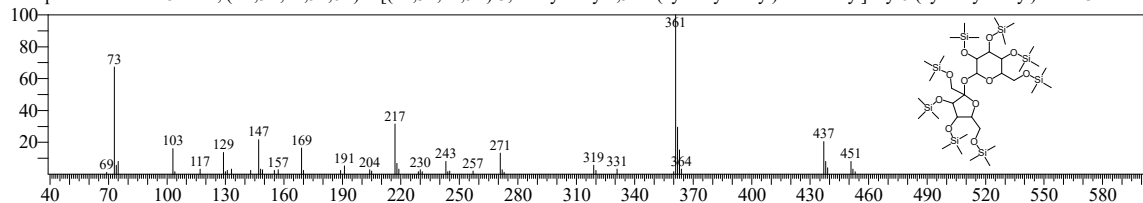

Hit#:4 Entry:560 Library:OA\_TMS\_DB5\_67min\_V3.lib

SI:32 Formula:C37H89NO11Si8 CAS:499-40-1 MolWeight:947 RetIndex:2947

CompName:Isomaltose-meto-8TMS(1) ; (3R,4S,5S,6R)-6-[(2S,3R,4S,5S,6R)-3,4,5-trihydroxy-6-(hydroxymethyl)oxan-2-yl]oxymethyl]oxane-2,3,

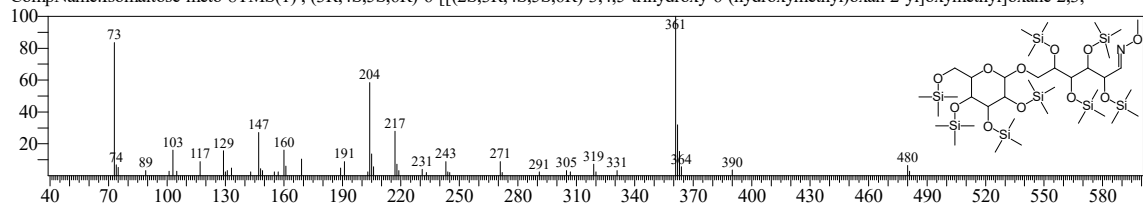

Hit#:5 Entry:555 Library:OA\_TMS\_DB5\_67min\_V3.lib

SI:31 Formula:C39H96O11Si9 CAS:585-86-4 MolWeight:992 RetIndex:2845

CompName:Lactitol-9TMS ; (2S,3R,4R,5R)-4-[(2S,3R,4S,5R,6R)-3,4,5-trihydroxy-6-(hydroxymethyl)oxan-2-yl]oxyhexane-1,2,3,5,6-pentol

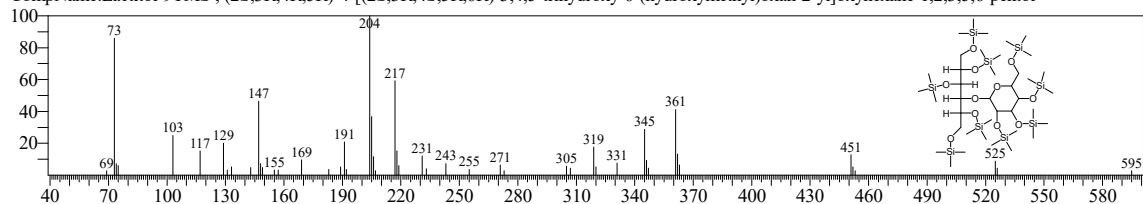

<< Target >>

Line#:12 R.Time:28.535(Scan#:4808) MassPeaks:270

RawMode:Averaged 28.530-28.540(4807-4809) BasePeak:191.00(1144)

BG Mode:Calc. from Peak Group 1 - Event 1 Q3 Scan

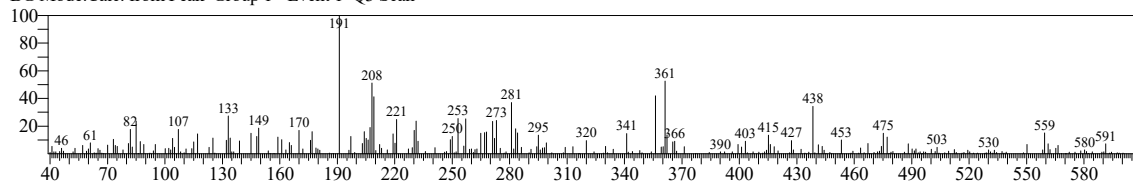

Hit#:1 Entry:552 Library:OA\_TMS\_DB5\_67min\_V3.lib

SI:36 Formula:C36H86O11Si8 CAS:99-20-7 MolWeight:918 RetIndex:2812

CompName:Trehalose-8TMS ; (2R,3S,4S,5R,6R)-2-(hydroxymethyl)-6-[(2R,3R,4S,5S,6R)-3,4,5-trihydroxy-6-(hydroxymethyl)oxan-2-yl]oxyoxane-

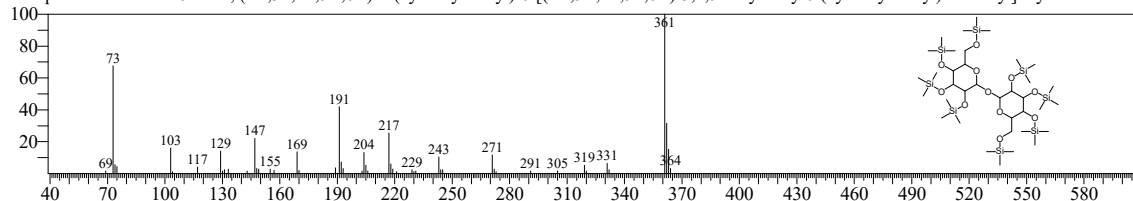

Hit#:2 Entry:541 Library:OA\_TMS\_DB5\_67min\_V3.lib

SI:33 Formula:C36H86O11Si8 CAS:57-50-1 MolWeight:918 RetIndex:2705

CompName:Sucrose-8TMS ; (2R,3R,4S,5S,6R)-2-[(2S,3S,4S,5R)-3,4-dihydroxy-2,5-bis(hydroxymethyl)oxolan-2-yl]oxy-6-(hydroxymethyl)oxane-3

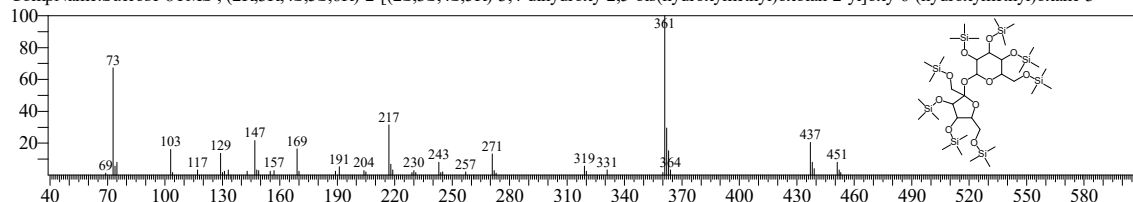

Hit#:3 Entry:561 Library:OA\_TMS\_DB5\_67min\_V3.lib

SI:33 Formula:C37H89NO11Si8 CAS:499-40-1 MolWeight:947 RetIndex:2983

CompName:Isomaltose-meto-8TMS(2) ; (3R,4S,5S,6R)-6-[[[(2S,3R,4S,5S,6R)-3,4,5-trihydroxy-6-(hydroxymethyl)oxan-2-yl]oxymethyl]oxane-2,3,

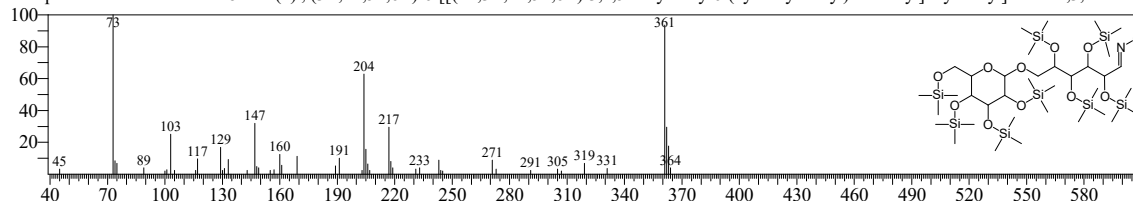

Hit#:4 Entry:345 Library:OA\_TMS\_DB5\_67min\_V3.lib

SI:32 Formula:C21H52O6Si5 CAS:59-23-4 MolWeight:540 RetIndex:1868

CompName:Galactose-5TMS(2) ; (3R,4S,5R,6R)-6-(hydroxymethyl)oxane-2,3,4,5-tetrol

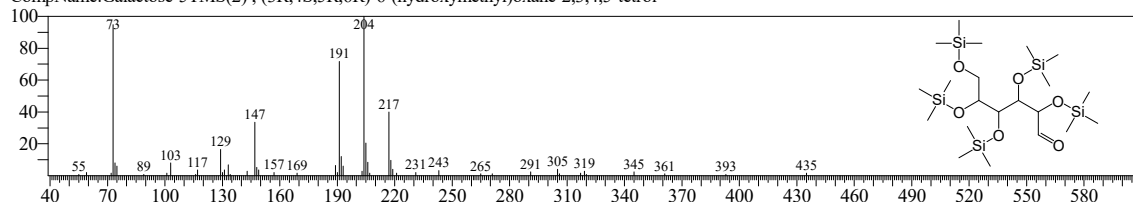

Hit#:5 Entry:559 Library:OA\_TMS\_DB5\_67min\_V3.lib

SI:32 Formula:C39H96O11Si9 CAS:585-88-6 MolWeight:992 RetIndex:2923

CompName:Maltitol-9TMS ; (2S,3R,4R,5R)-4-[(2R,3R,4S,5S,6R)-3,4,5-trihydroxy-6-(hydroxymethyl)oxan-2-yl]oxyhexane-1,2,3,5,6-pentol

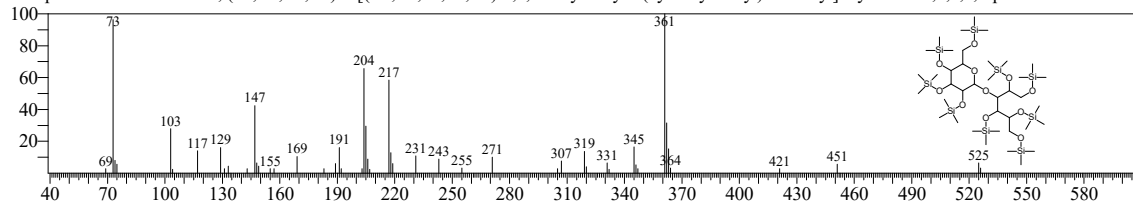

&lt;&lt; Target &gt;&gt;

Line#:13 R.Time:28.605(Scan#:4822) MassPeaks:295

RawMode:Averaged 28.600-28.610(4821-4823) BasePeak:217.10(2047)

BG Mode:Calc. from Peak Group 1 - Event 1 Q3 Scan

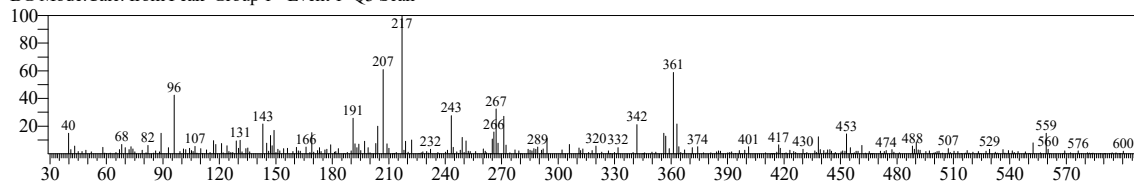

Hit#:1 Entry:552 Library:OA\_TMS\_DB5\_67min\_V3.lib

SI:43 Formula:C36H86O11Si8 CAS:99-20-7 MolWeight:918 RetIndex:2812

CompName:Trehalose-8TMS ; (2R,3S,4S,5R,6R)-2-(hydroxymethyl)-6-[(2R,3R,4S,5S,6R)-3,4,5-trihydroxy-6-(hydroxymethyl)oxan-2-yl]oxyoxane-

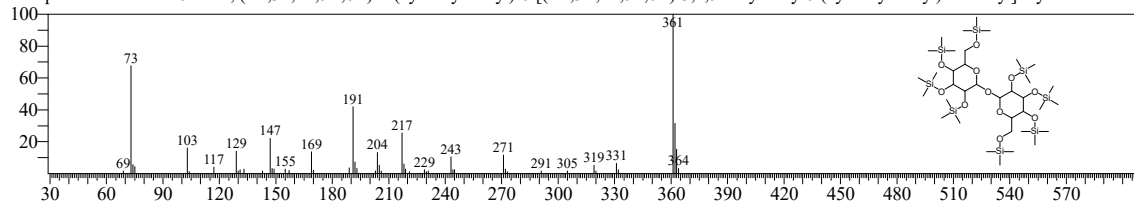

Hit#:2 Entry:559 Library:OA\_TMS\_DB5\_67min\_V3.lib

SI:43 Formula:C39H96O11Si9 CAS:585-88-6 MolWeight:992 RetIndex:2923

CompName:Maltitol-9TMS ; (2S,3R,4R,5R)-4-[(2R,3R,4S,5S,6R)-3,4,5-trihydroxy-6-(hydroxymethyl)oxan-2-yl]oxyhexane-1,2,3,5,6-pentol

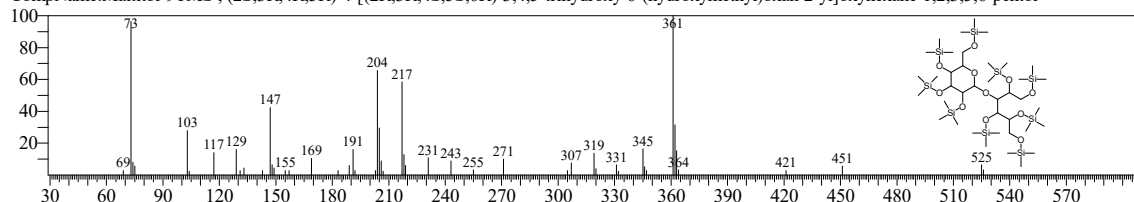

Hit#:3 Entry:555 Library:OA\_TMS\_DB5\_67min\_V3.lib

SI:41 Formula:C39H96O11Si9 CAS:585-86-4 MolWeight:992 RetIndex:2845

CompName:Lactitol-9TMS ; (2S,3R,4R,5R)-4-[(2S,3R,4S,5R,6R)-3,4,5-trihydroxy-6-(hydroxymethyl)oxan-2-yl]oxyhexane-1,2,3,5,6-pentol

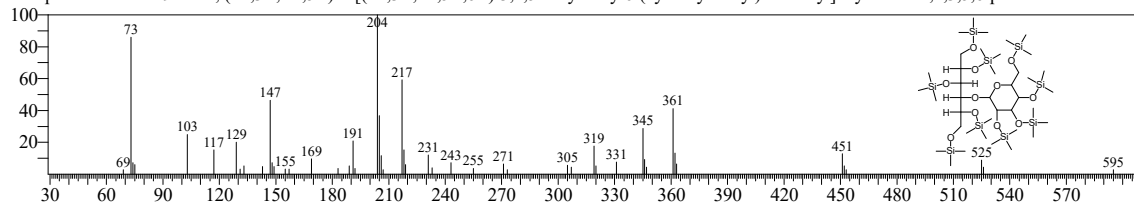

Hit#:4 Entry:541 Library:OA\_TMS\_DB5\_67min\_V3.lib

SI:41 Formula:C36H86O11Si8 CAS:57-50-1 MolWeight:918 RetIndex:2705

CompName:Sucrose-8TMS ; (2R,3R,4S,5S,6R)-2-[(2S,3S,4S,5R)-3,4-dihydroxy-2,5-bis(hydroxymethyl)oxolan-2-yl]oxy-6-(hydroxymethyl)oxane-3

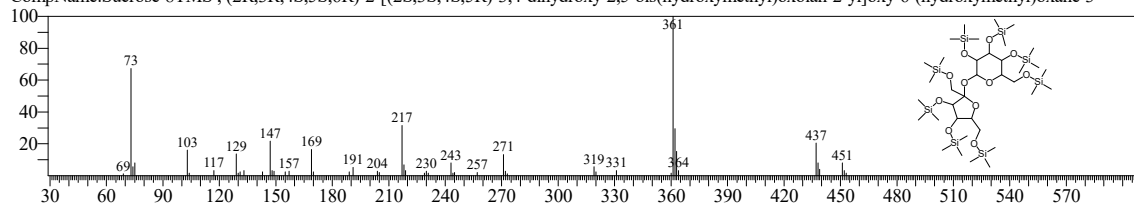

Hit#:5 Entry:560 Library:OA\_TMS\_DB5\_67min\_V3.lib

SI:40 Formula:C37H89NO11Si8 CAS:499-40-1 MolWeight:947 RetIndex:2947

CompName:Isomaltose-meto-8TMS(1) ; (3R,4S,5S,6R)-6-[(2S,3R,4S,5S,6R)-3,4,5-trihydroxy-6-(hydroxymethyl)oxan-2-yl]oxymethyl]oxane-2,3,

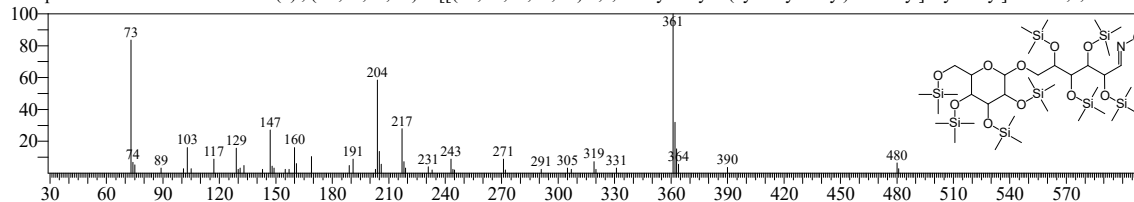

# TNAU

<< Target >>

Line#:14 R.Time:28.645(Scan#:4830) MassPeaks:278

RawMode:Averaged 28.640-28.650(4829-4831) BasePeak:207.05(1200)

BG Mode:Calc. from Peak Group 1 - Event 1 Q3 Scan

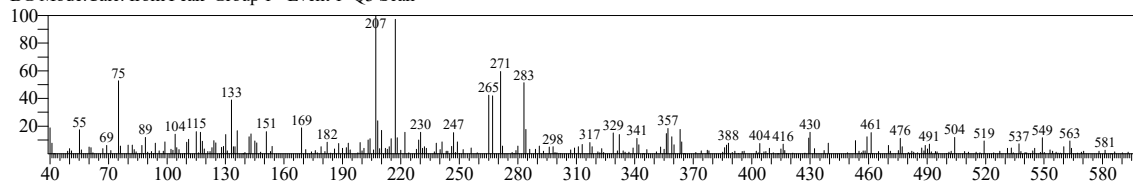

Hit#:1 Entry:227 Library:OA\_TMS\_DB5\_67min\_V3.lib

SI:29 Formula:C<sub>17</sub>H<sub>42</sub>O<sub>5</sub>Si<sub>4</sub> CAS:50-69-1 MolWeight:438 RetIndex:1657

CompName:Ribose-4TMS(1) ; (3R,4S,5R)-5-(hydroxymethyl)oxolane-2,3,4-triol

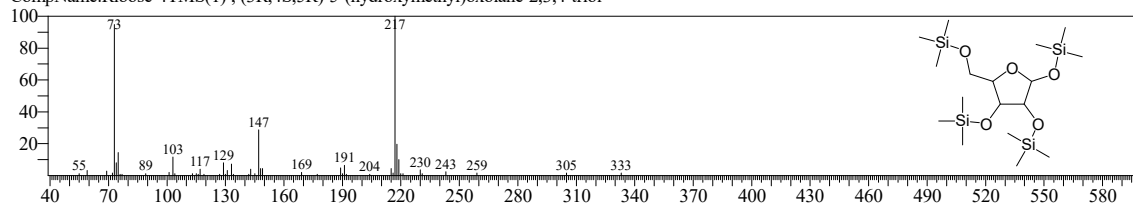

Hit#:2 Entry:345 Library:OA\_TMS\_DB5\_67min\_V3.lib

SI:28 Formula:C<sub>21</sub>H<sub>52</sub>O<sub>6</sub>Si<sub>5</sub> CAS:59-23-4 MolWeight:540 RetIndex:1868

CompName:Galactose-5TMS(2) ; (3R,4S,5R,6R)-6-(hydroxymethyl)oxane-2,3,4,5-tetrol

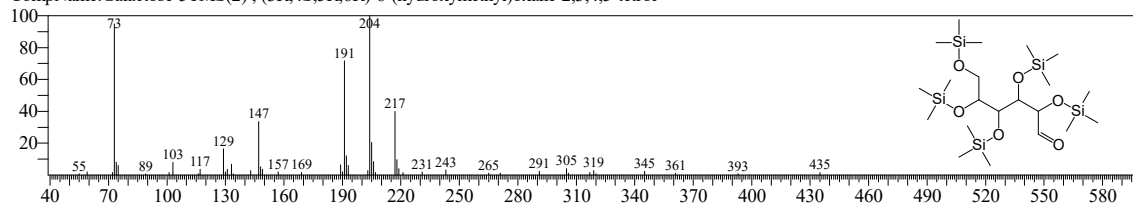

Hit#:3 Entry:326 Library:OA\_TMS\_DB5\_67min\_V3.lib

SI:28 Formula:C<sub>21</sub>H<sub>52</sub>O<sub>6</sub>Si<sub>5</sub> CAS:23140-52-5 MolWeight:540 RetIndex:1841

CompName:Psicose-5TMS(2) ; (3R,4R,5R)-1,3,4,5,6-pentahydroxyhexan-2-one

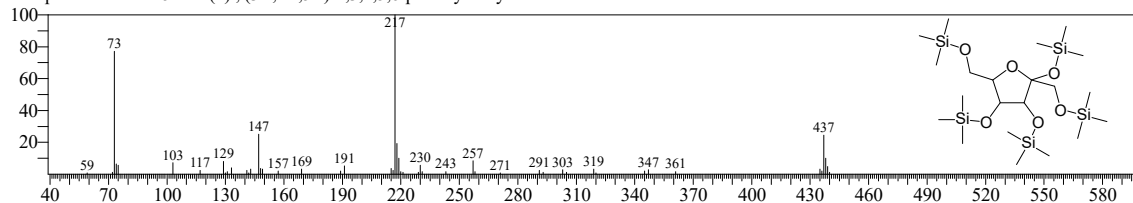

Hit#:4 Entry:349 Library:OA\_TMS\_DB5\_67min\_V3.lib

SI:27 Formula:C<sub>21</sub>H<sub>52</sub>O<sub>6</sub>Si<sub>5</sub> CAS:2595-97-3 MolWeight:540 RetIndex:1874

CompName:Allose-5TMS ; (2R,3R,4R,5R)-2,3,4,5,6-pentahydroxyhexanal

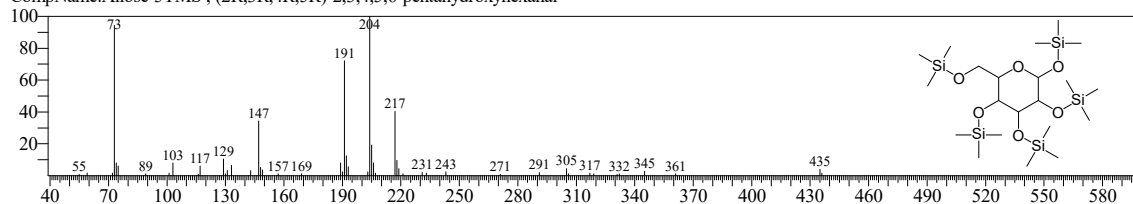

Hit#:5 Entry:386 Library:OA\_TMS\_DB5\_67min\_V3.lib

SI:27 Formula:C<sub>21</sub>H<sub>52</sub>O<sub>6</sub>Si<sub>5</sub> CAS:50-99-7 MolWeight:540 RetIndex:1922

CompName:Glucose-5TMS(1) ; (3R,4S,5S,6R)-6-(hydroxymethyl)oxane-2,3,4,5-tetrol

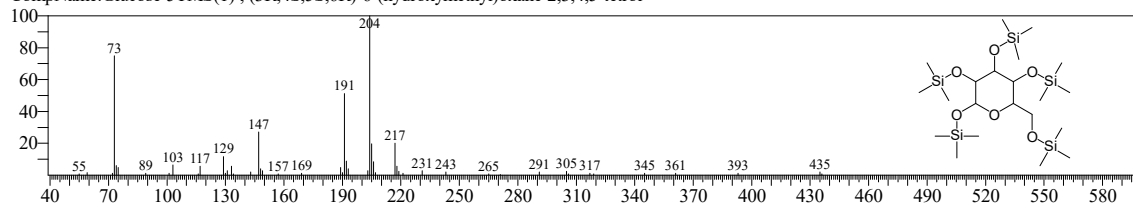



<< Target >>

Line#:15 R.Time:28.755(Scan#:4852) MassPeaks:312

RawMode:Averaged 28.750-28.760(4851-4853) BasePeak:207.05(3380)

BG Mode:Calc. from Peak Group 1 - Event 1 Q3 Scan

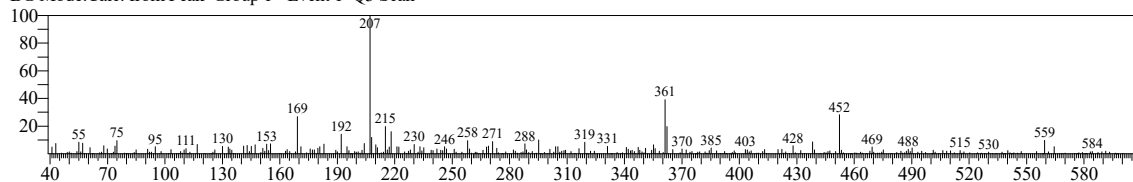

Hit#:1 Entry:555 Library:OA\_TMS\_DB5\_67min\_V3.lib

SI:41 Formula:C39H96O11Si9 CAS:585-86-4 MolWeight:992 RetIndex:2845

CompName:Lactitol-9TMS ; (2S,3R,4R,5R)-4-[(2S,3R,4S,5R,6R)-3,4,5-trihydroxy-6-(hydroxymethyl)oxan-2-yl]oxyhexane-1,2,3,5,6-pentol

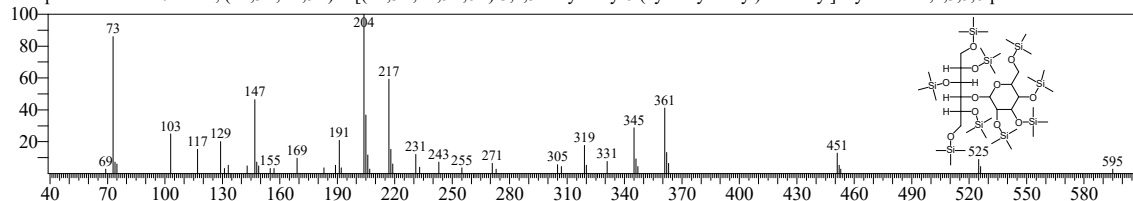

Hit#:2 Entry:559 Library:OA\_TMS\_DB5\_67min\_V3.lib

SI:40 Formula:C39H96O11Si9 CAS:585-88-6 MolWeight:992 RetIndex:2923

CompName:Maltitol-9TMS ; (2S,3R,4R,5R)-4-[(2R,3R,4S,5S,6R)-3,4,5-trihydroxy-6-(hydroxymethyl)oxan-2-yl]oxyhexane-1,2,3,5,6-pentol

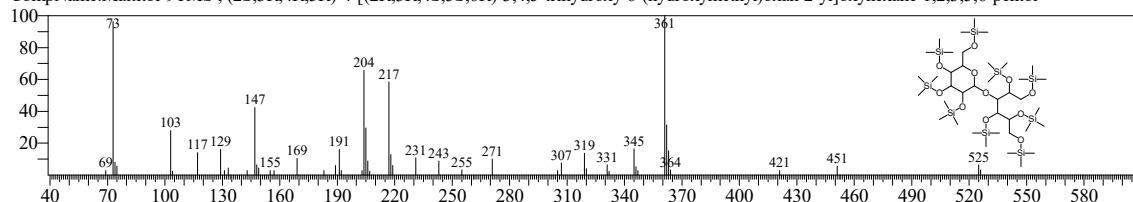

Hit#:3 Entry:541 Library:OA\_TMS\_DB5\_67min\_V3.lib

SI:39 Formula:C36H86O11Si8 CAS:57-50-1 MolWeight:918 RetIndex:2705

CompName:Sucrose-8TMS ; (2R,3R,4S,5S,6R)-2-[(2S,3S,4S,5R)-3,4-dihydroxy-2,5-bis(hydroxymethyl)oxolan-2-yl]oxy-6-(hydroxymethyl)oxane-3

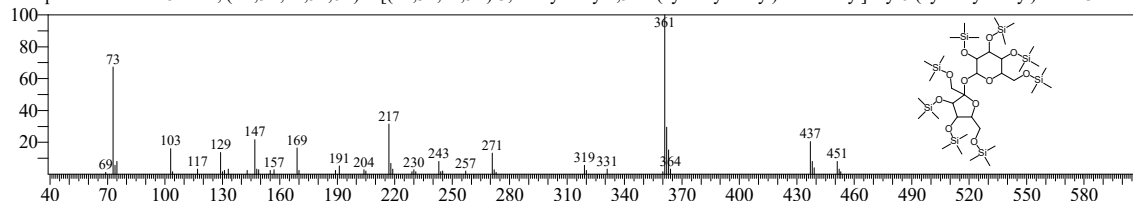

Hit#:4 Entry:552 Library:OA\_TMS\_DB5\_67min\_V3.lib

SI:38 Formula:C36H86O11Si8 CAS:99-20-7 MolWeight:918 RetIndex:2812

CompName:Trehalose-8TMS ; (2R,3S,4S,5R,6R)-2-(hydroxymethyl)-6-[(2R,3R,4S,5S,6R)-3,4,5-trihydroxy-6-(hydroxymethyl)oxan-2-yl]oxyoxane-

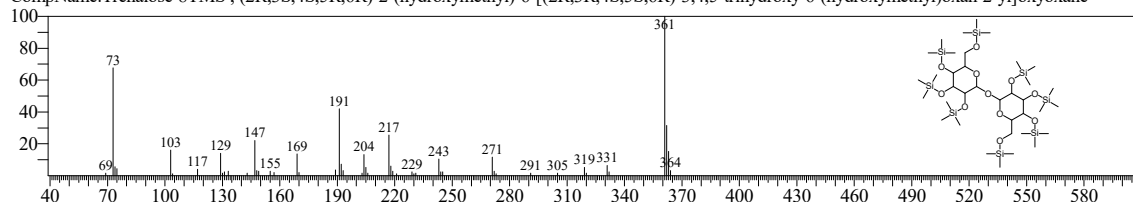

Hit#:5 Entry:560 Library:OA\_TMS\_DB5\_67min\_V3.lib

SI:36 Formula:C37H89NO11Si8 CAS:499-40-1 MolWeight:947 RetIndex:2947

CompName:Isomaltose-meto-8TMS(1) ; (3R,4S,5S,6R)-6-[(2S,3R,4S,5S,6R)-3,4,5-trihydroxy-6-(hydroxymethyl)oxan-2-yl]oxymethyl]oxane-2,3,

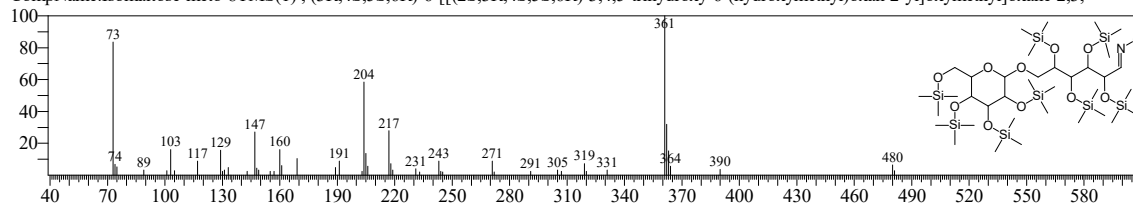

# TNAU

<< Target >>

Line#:16 R.Time:28.805(Scan#:4862) MassPeaks:303

RawMode:Averaged 28.800-28.810(4861-4863) BasePeak:207.05(1578)

BG Mode:Calc. from Peak Group 1 - Event 1 Q3 Scan

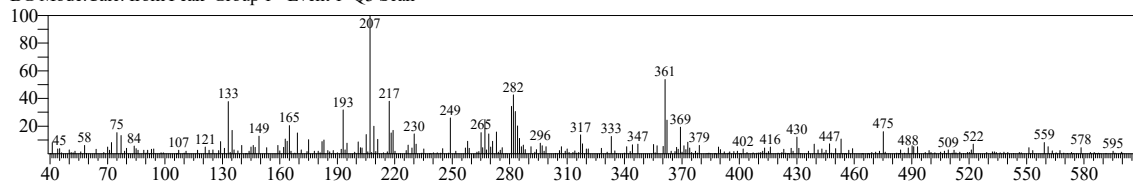

Hit#:1 Entry:179 Library:OA\_TMS\_DB5\_67min\_V3.lib

SI:34 Formula:C13H22O3Si2 CAS:99-06-9 MolWeight:282 RetIndex:1572

CompName:3-Hydroxybenzoic acid-2TMS ; 3-hydroxybenzoic acid

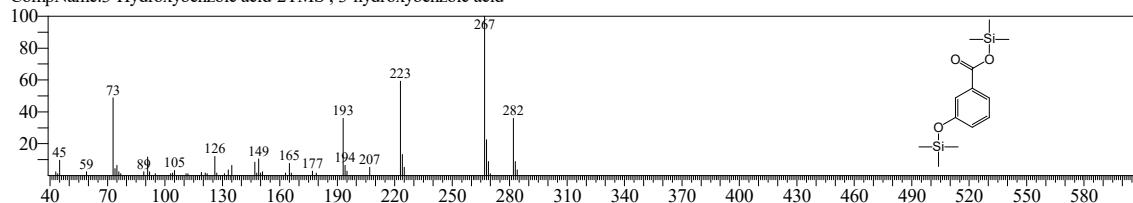

Hit#:2 Entry:559 Library:OA\_TMS\_DB5\_67min\_V3.lib

SI:32 Formula:C39H96O11Si9 CAS:585-88-6 MolWeight:992 RetIndex:2923

CompName:Maltitol-9TMS ; (2S,3R,4R,5R)-4-[(2R,3R,4S,5S,6R)-3,4,5-trihydroxy-6-(hydroxymethyl)oxan-2-yl]oxyhexane-1,2,3,5,6-pentol



Hit#:3 Entry:541 Library:OA\_TMS\_DB5\_67min\_V3.lib

SI:32 Formula:C36H86O11Si8 CAS:57-50-1 MolWeight:918 RetIndex:2705

CompName:Sucrose-8TMS ; (2R,3R,4S,5S,6R)-2-[(2S,3S,4S,5R)-3,4-dihydroxy-2,5-bis(hydroxymethyl)oxolan-2-yl]oxy-6-(hydroxymethyl)oxane-3

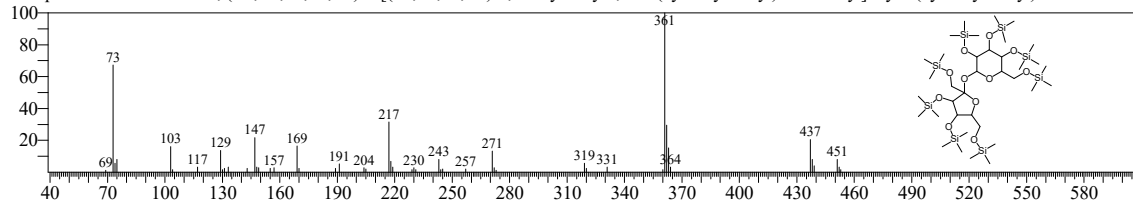

Hit#:4 Entry:552 Library:OA\_TMS\_DB5\_67min\_V3.lib

SI:31 Formula:C36H86O11Si8 CAS:99-20-7 MolWeight:918 RetIndex:2812

CompName:Trehalose-8TMS ; (2R,3S,4S,5R,6R)-2-(hydroxymethyl)-6-[(2R,3R,4S,5S,6R)-3,4,5-trihydroxy-6-(hydroxymethyl)oxan-2-yl]oxyoxane-

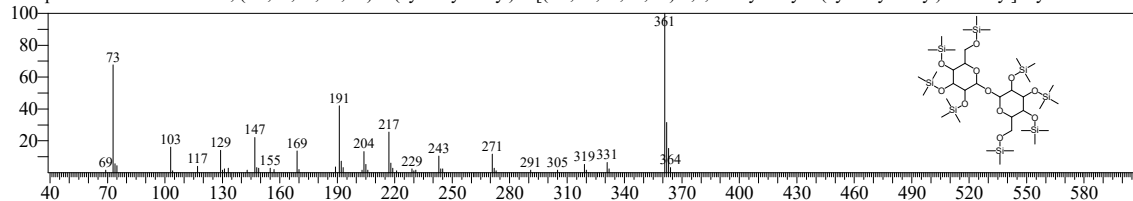

Hit#:5 Entry:211 Library:OA\_TMS\_DB5\_67min\_V3.lib

SI:30 Formula:C13H22O3Si2 CAS:99-96-7 MolWeight:282 RetIndex:1636

CompName:4-Hydroxybenzoic acid-2TMS ; 4-hydroxybenzoic acid

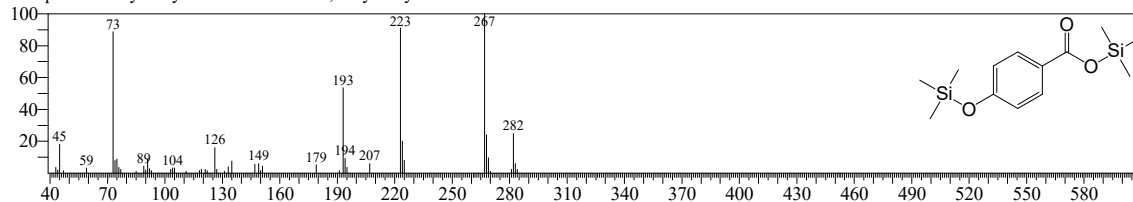

# TNAU

<< Target >>

Line#:17 R.Time:28.855(Scan#:4872) MassPeaks:268

RawMode:Averaged 28.850-28.860(4871-4873) BasePeak:281.05(1731)

BG Mode:Calc. from Peak Group 1 - Event 1 Q3 Scan

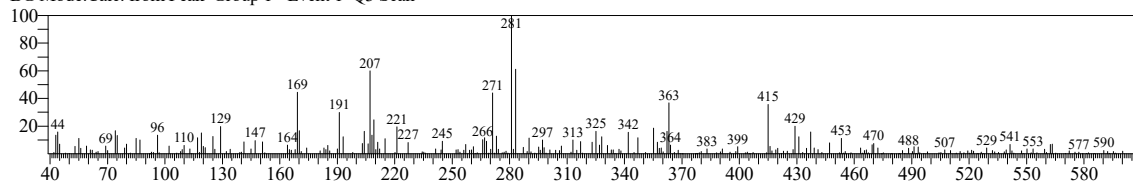

Hit#:1 Entry:437 Library:OA\_TMS\_DB5\_67min\_V3.lib

SI:27 Formula:C<sub>21</sub>H<sub>52</sub>O<sub>6</sub>Si<sub>5</sub> CAS:50-99-7 MolWeight:540 RetIndex:2002

CompName:Glucose-5TMS(2) ; (3R,4S,5S,6R)-6-(hydroxymethyl)oxane-2,3,4,5-tetrol

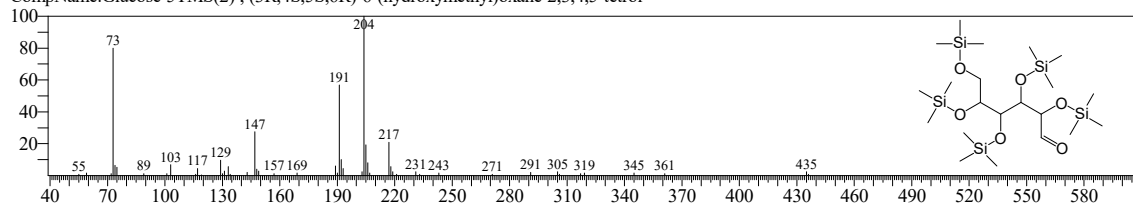

Hit#:2 Entry:555 Library:OA\_TMS\_DB5\_67min\_V3.lib

SI:26 Formula:C<sub>39</sub>H<sub>96</sub>O<sub>11</sub>Si<sub>9</sub> CAS:585-86-4 MolWeight:992 RetIndex:2845

CompName:Lactitol-9TMS ; (2S,3R,4R,5R)-4-[(2S,3R,4S,5R,6R)-3,4,5-trihydroxy-6-(hydroxymethyl)oxan-2-yl]oxyhexane-1,2,3,5,6-pentol

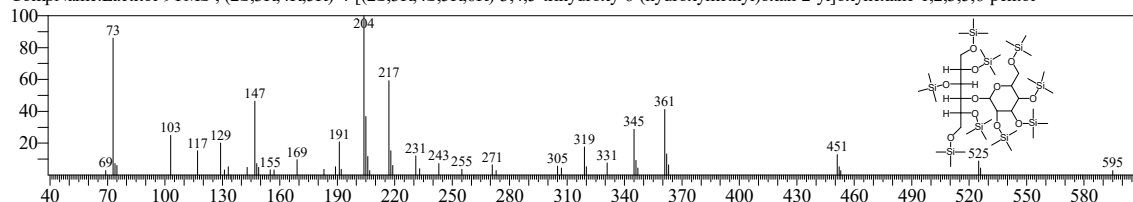

Hit#:3 Entry:348 Library:OA\_TMS\_DB5\_67min\_V3.lib

SI:26 Formula:C<sub>21</sub>H<sub>52</sub>O<sub>6</sub>Si<sub>5</sub> CAS:3458-28-4 MolWeight:540 RetIndex:1872

CompName:Mannose-5TMS(2) ; (3S,4S,5S,6R)-6-(hydroxymethyl)oxane-2,3,4,5-tetrol

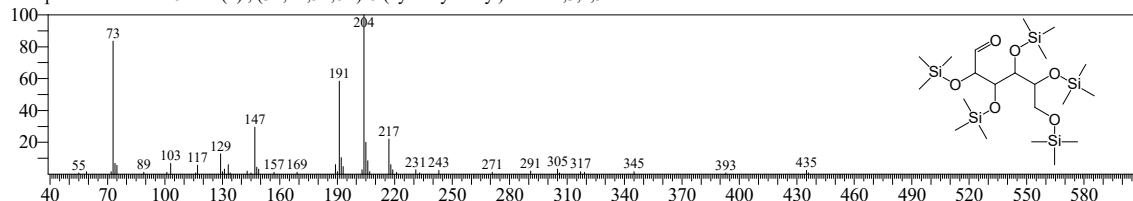

Hit#:4 Entry:345 Library:OA\_TMS\_DB5\_67min\_V3.lib

SI:26 Formula:C<sub>21</sub>H<sub>52</sub>O<sub>6</sub>Si<sub>5</sub> CAS:59-23-4 MolWeight:540 RetIndex:1868

CompName:Galactose-5TMS(2) ; (3R,4S,5R,6R)-6-(hydroxymethyl)oxane-2,3,4,5-tetrol



Hit#:5 Entry:349 Library:OA\_TMS\_DB5\_67min\_V3.lib

SI:26 Formula:C<sub>21</sub>H<sub>52</sub>O<sub>6</sub>Si<sub>5</sub> CAS:2595-97-3 MolWeight:540 RetIndex:1874

CompName:Allose-5TMS ; (2R,3R,4R,5R)-2,3,4,5,6-pentahydroxyhexanal

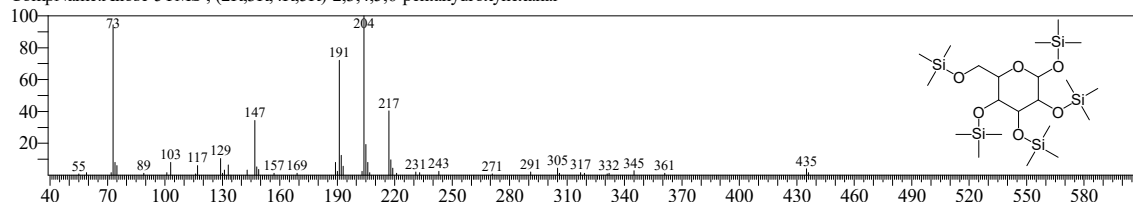

# TNAU

<< Target >>

Line#:18 R.Time:28.900(Scan#:4881) MassPeaks:266

RawMode:Averaged 28.895-28.905(4880-4882) BasePeak:217.10(936)

BG Mode:Calc. from Peak Group 1 - Event 1 Q3 Scan

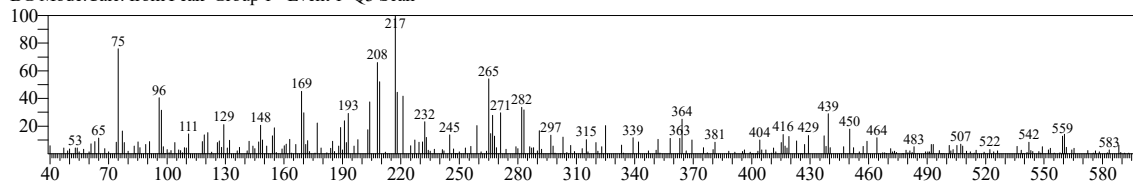

Hit#:1 Entry:210 Library:OA\_TMS\_DB5\_67min\_V3.lib

SI:39 Formula:C17H42O5Si4 CAS:10323-20-3 MolWeight:438 RetIndex:1634

CompName:Arabinose-4TMS(1) ; (2S,3R,4R)-2,3,4,5-tetrahydropentanal

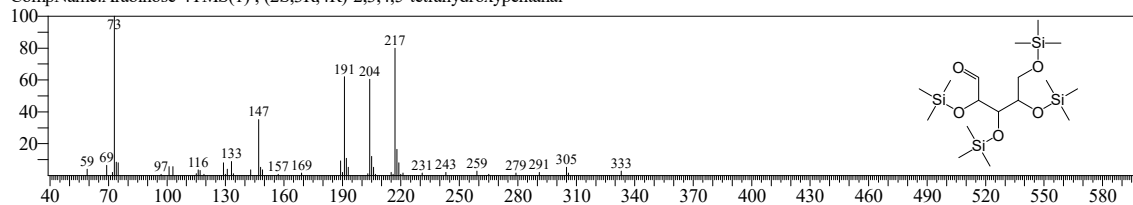

Hit#:2 Entry:250 Library:OA\_TMS\_DB5\_67min\_V3.lib

SI:39 Formula:C17H42O5Si4 CAS:50-69-1 MolWeight:438 RetIndex:1691

CompName:Ribose-4TMS(4) ; (3R,4S,5R)-5-(hydroxymethyl)oxolane-2,3,4-triol

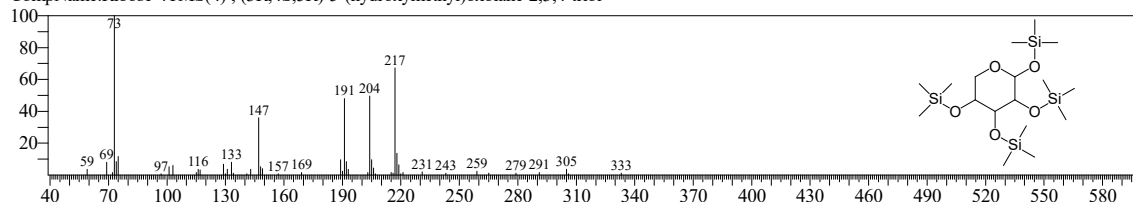

Hit#:3 Entry:523 Library:OA\_TMS\_DB5\_67min\_V3.lib

SI:37 Formula:C18H36N2O6Si3 CAS:58-96-8 MolWeight:460 RetIndex:2483

CompName:Uridine-3TMS ; 1-[(2R,3R,4S,5R)-3,4-dihydroxy-5-(hydroxymethyl)oxolan-2-yl]pyrimidine-2,4-dione

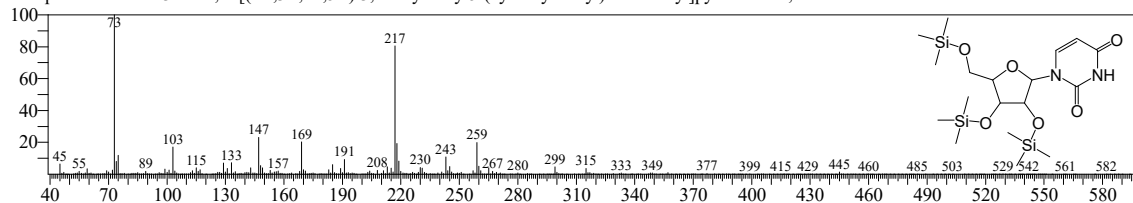

Hit#:4 Entry:306 Library:OA\_TMS\_DB5\_67min\_V3.lib

SI:36 Formula:C18H44O5Si4 CAS:154-17-6 MolWeight:452 RetIndex:1816

CompName:2-Deoxy-glucose-4TMS(2) ; (2S,4S,5S,6S)-6-(hydroxymethyl)oxane-2,4,5-triol

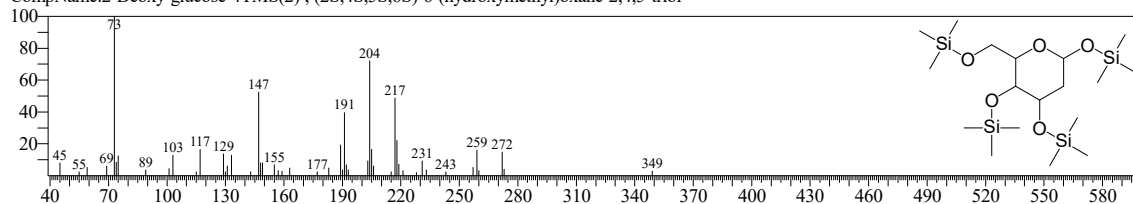

Hit#:5 Entry:295 Library:OA\_TMS\_DB5\_67min\_V3.lib

SI:36 Formula:C17H42O5Si4 CAS:58-86-6 MolWeight:438 RetIndex:1784

CompName:Xylose-4TMS(2) ; (2R,3S,4R)-2,3,4,5-tetrahydroxypentanal

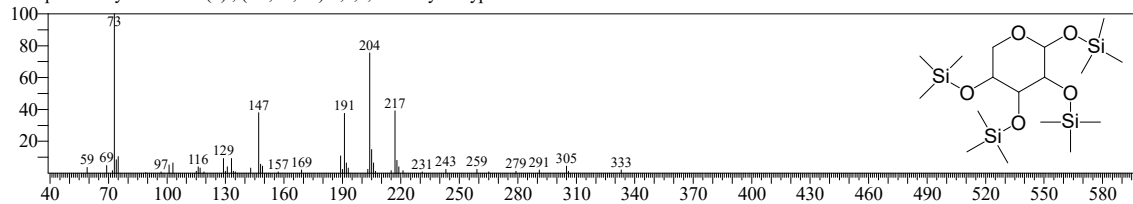

&lt;&lt; Target &gt;&gt;

Line#:19 R.Time:28.955(Scan#:4892) MassPeaks:296

RawMode:Averaged 28.950-28.960(4891-4893) BasePeak:207.05(1454)

BG Mode:Calc. from Peak Group 1 - Event 1 Q3 Scan

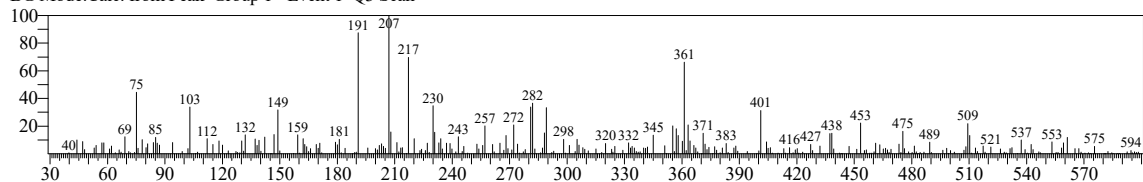

Hit#:1 Entry:541 Library:OA\_TMS\_DB5\_67min\_V3.lib

SI:37 Formula:C36H86O11Si8 CAS:57-50-1 MolWeight:918 RetIndex:2705

CompName:Sucrose-8TMS ; (2R,3R,4S,5S,6R)-2-[(2S,3S,4S,5R)-3,4-dihydroxy-2,5-bis(hydroxymethyl)oxolan-2-yl]oxy-6-(hydroxymethyl)oxane-3

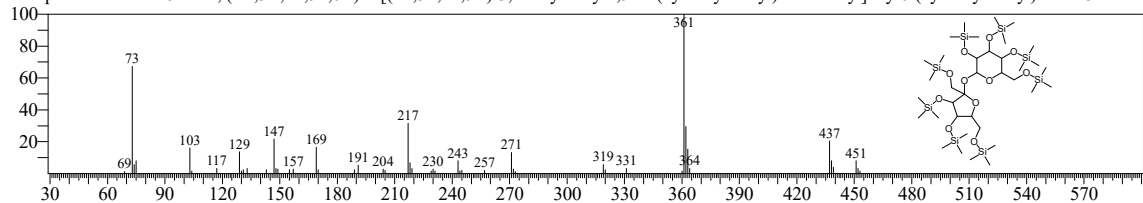

Hit#:2 Entry:559 Library:OA\_TMS\_DB5\_67min\_V3.lib

SI:36 Formula:C39H96O11Si9 CAS:585-88-6 MolWeight:992 RetIndex:2923

CompName:Maltitol-9TMS ; (2S,3R,4R,5R)-4-[(2R,3R,4S,5S,6R)-3,4,5-trihydroxy-6-(hydroxymethyl)oxan-2-yl]oxyhexane-1,2,3,5,6-pentol

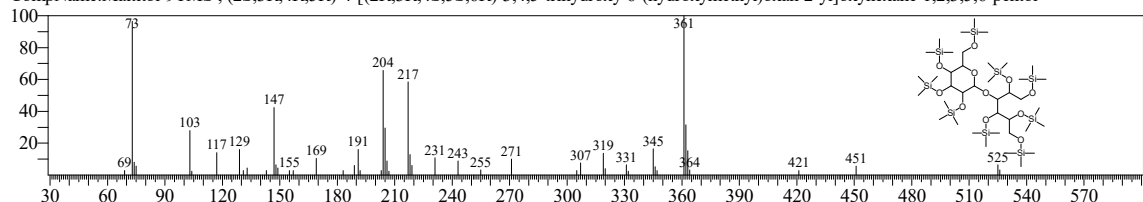

Hit#:3 Entry:552 Library:OA\_TMS\_DB5\_67min\_V3.lib

SI:35 Formula:C36H86O11Si8 CAS:99-20-7 MolWeight:918 RetIndex:2812

CompName:Trehalose-8TMS ; (2R,3S,4S,5R,6R)-2-(hydroxymethyl)-6-[(2R,3R,4S,5S,6R)-3,4,5-trihydroxy-6-(hydroxymethyl)oxan-2-yl]oxyoxane-

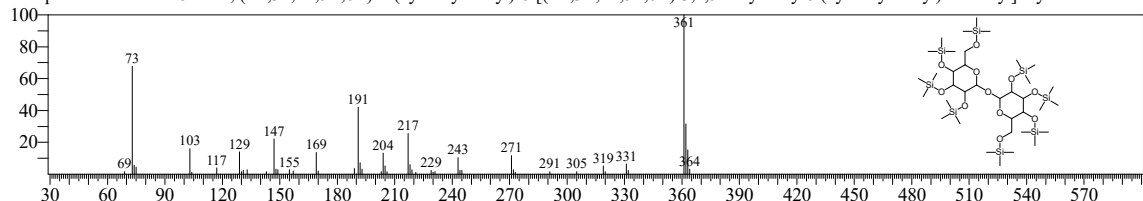

Hit#:4 Entry:326 Library:OA\_TMS\_DB5\_67min\_V3.lib

SI:34 Formula:C21H52O6Si5 CAS:23140-52-5 MolWeight:540 RetIndex:1841

CompName:Psicose-5TMS(2) ; (3R,4R,5R)-1,3,4,5,6-pentahydroxyhexan-2-one

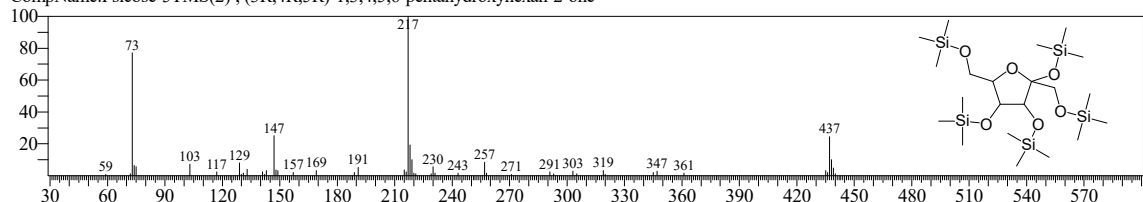

Hit#:5 Entry:560 Library:OA\_TMS\_DB5\_67min\_V3.lib

SI:29 Formula:C37H89NO11Si8 CAS:499-40-1 MolWeight:947 RetIndex:2947

CompName:Isomaltose-meto-8TMS(1) ; (3R,4S,5S,6R)-6-[[[(2S,3R,4S,5S,6R)-3,4,5-trihydroxy-6-(hydroxymethyl)oxan-2-yl]oxymethyl]oxane-2,3,

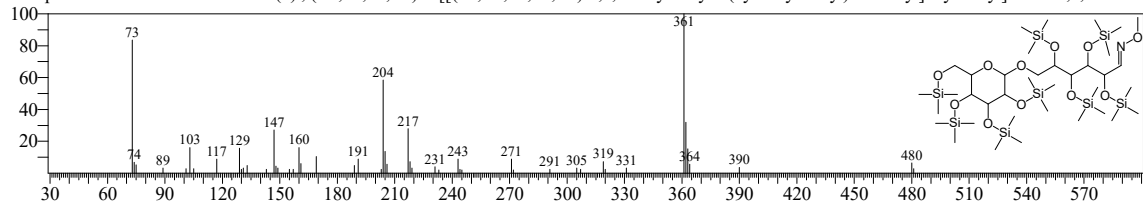

# TNAU

<< Target >>

Line#:20 R.Time:29.100(Scan#:4921) MassPeaks:293

RawMode:Averaged 29.095-29.105(4920-4922) BasePeak:217.10(1260)

BG Mode:Calc. from Peak Group 1 - Event 1 Q3 Scan

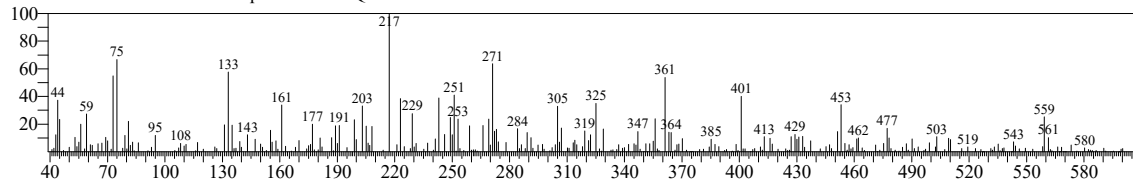

Hit#:1 Entry:559 Library:OA\_TMS\_DB5\_67min\_V3.lib

SI:39 Formula:C39H96O11Si9 CAS:585-88-6 MolWeight:992 RetIndex:2923

CompName:Maltitol-9TMS; (2S,3R,4R,5R)-4-[(2R,3R,4S,5S,6R)-3,4,5-trihydroxy-6-(hydroxymethyl)oxan-2-yl]oxyhexane-1,2,3,5,6-pentol

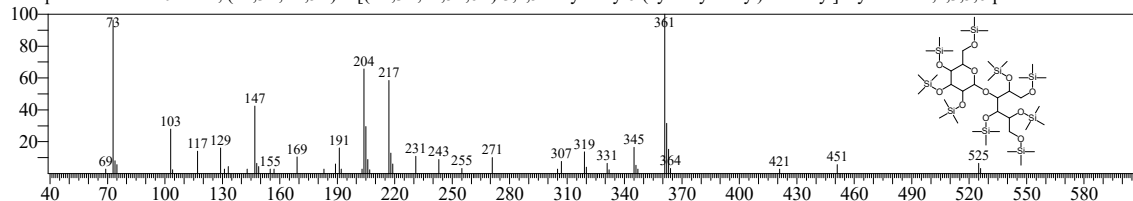

Hit#:2 Entry:561 Library:OA\_TMS\_DB5\_67min\_V3.lib

SI:39 Formula:C37H89NO11Si8 CAS:499-40-1 MolWeight:947 RetIndex:2983

CompName:Isomaltose-meto-8TMS(2); (3R,4S,5S,6R)-6-[(2S,3R,4S,5S,6R)-3,4,5-trihydroxy-6-(hydroxymethyl)oxan-2-yl]oxymethyl]oxane-2,3,



Hit#:3 Entry:552 Library:OA\_TMS\_DB5\_67min\_V3.lib

SI:39 Formula:C36H86O11Si8 CAS:99-20-7 MolWeight:918 RetIndex:2812

CompName:Trehalose-8TMS; (2R,3S,4S,5R,6R)-2-(hydroxymethyl)-6-[(2R,3R,4S,5S,6R)-3,4,5-trihydroxy-6-(hydroxymethyl)oxan-2-yl]oxyoxane-

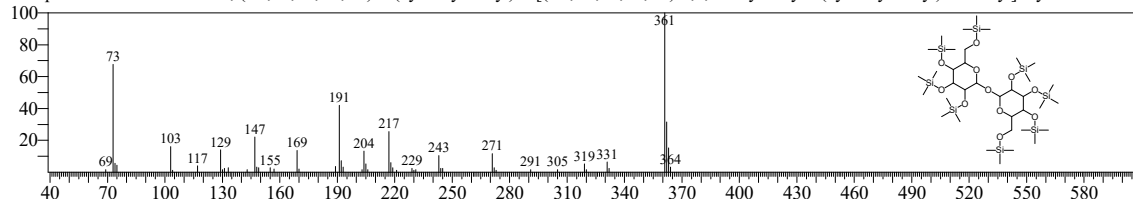

Hit#:4 Entry:553 Library:OA\_TMS\_DB5\_67min\_V3.lib

SI:38 Formula:C37H89NO11Si8 CAS:69-79-4 MolWeight:947 RetIndex:2817

CompName:Maltose-meto-8TMS(1); (2R,3S,4S,5R,6R)-2-(hydroxymethyl)-6-[(2R,3S,4R,5R,6R)-4,5,6-trihydroxy-2-(hydroxymethyl)oxan-3-yl]oxy

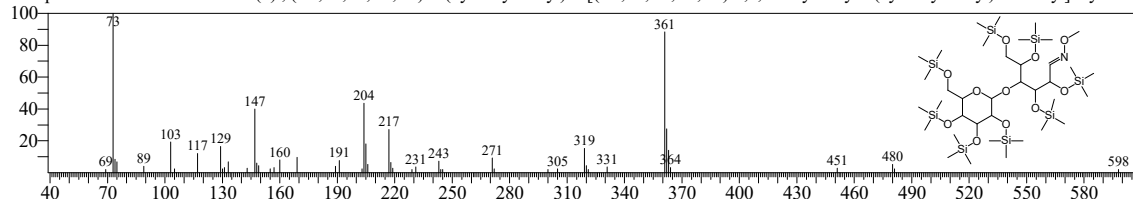

Hit#:5 Entry:545 Library:OA\_TMS\_DB5\_67min\_V3.lib

SI:38 Formula:C37H89NO11Si8 CAS:63-42-3 MolWeight:947 RetIndex:2760

CompName:Lactose-meto-8TMS(1); (2R,3R,4S,5R,6S)-2-(hydroxymethyl)-6-[(2R,3S,4R,5R,6R)-4,5,6-trihydroxy-2-(hydroxymethyl)oxan-3-yl]oxy

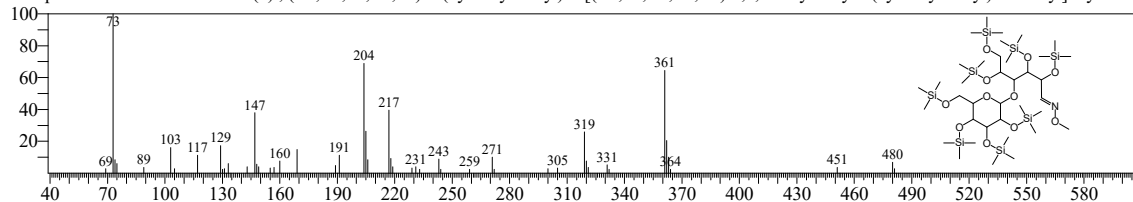

# TNAU

<< Target >>

Line#:21 R.Time:29.155(Scan#:4932) MassPeaks:308

RawMode:Averaged 29.150-29.160(4931-4933) BasePeak:361.20(2849)

BG Mode:Calc. from Peak Group 1 - Event 1 Q3 Scan

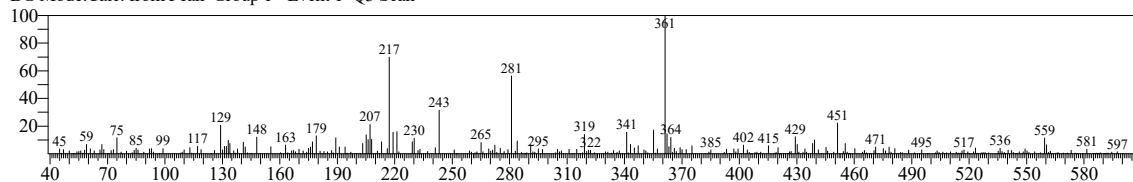

Hit#:1 Entry:541 Library:OA\_TMS\_DB5\_67min\_V3.lib

SI:46 Formula:C36H86O11Si8 CAS:57-50-1 MolWeight:918 RetIndex:2705

CompName:Sucrose-8TMS ; (2R,3R,4S,5S,6R)-2-[(2S,3S,4S,5R)-3,4-dihydroxy-2,5-bis(hydroxymethyl)oxolan-2-yl]oxy-6-(hydroxymethyl)oxane-3



Hit#:2 Entry:559 Library:OA\_TMS\_DB5\_67min\_V3.lib

SI:45 Formula:C39H96O11Si9 CAS:585-88-6 MolWeight:992 RetIndex:2923

CompName:Maltitol-9TMS ; (2S,3R,4R,5R)-4-[(2R,3R,4S,5S,6R)-3,4,5-trihydroxy-6-(hydroxymethyl)oxan-2-yl]oxyhexane-1,2,3,5,6-pentol



Hit#:3 Entry:552 Library:OA\_TMS\_DB5\_67min\_V3.lib

SI:43 Formula:C36H86O11Si8 CAS:99-20-7 MolWeight:918 RetIndex:2812

CompName:Trehalose-8TMS ; (2R,3S,4S,5R,6R)-2-(hydroxymethyl)-6-[(2R,3R,4S,5S,6R)-3,4,5-trihydroxy-6-(hydroxymethyl)oxan-2-yl]oxyoxane-



Hit#:4 Entry:560 Library:OA\_TMS\_DB5\_67min\_V3.lib

SI:42 Formula:C37H89NO11Si8 CAS:499-40-1 MolWeight:947 RetIndex:2947

CompName:Isomaltose-meto-8TMS(1) ; (3R,4S,5S,6R)-6-[(2S,3R,4S,5S,6R)-3,4,5-trihydroxy-6-(hydroxymethyl)oxan-2-yl]oxymethyl]oxane-2,3,

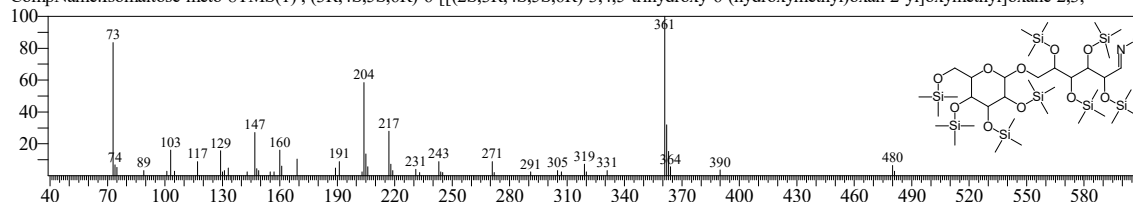

Hit#:5 Entry:326 Library:OA\_TMS\_DB5\_67min\_V3.lib

SI:37 Formula:C21H52O6Si5 CAS:23140-52-5 MolWeight:540 RetIndex:1841

CompName:Psicose-5TMS(2) ; (3R,4R,5R)-1,3,4,5,6-pentahydroxyhexan-2-one

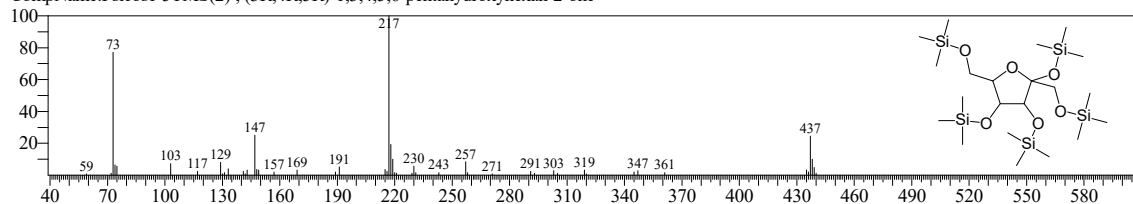

# TNAU

<< Target >>

Line#:22 R.Time:29.250(Scan#:4951) MassPeaks:291

RawMode:Averaged 29.245-29.255(4950-4952) BasePeak:230.10(1452)

BG Mode:Calc. from Peak Group 1 - Event 1 Q3 Scan

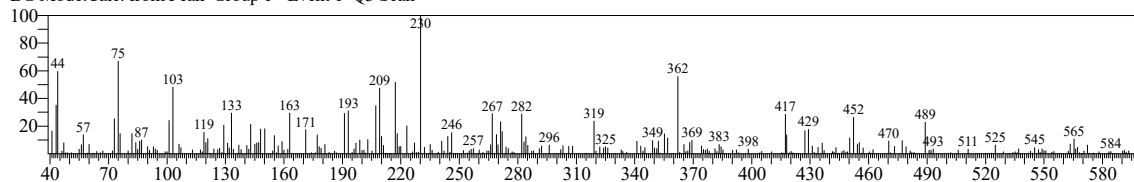

Hit#:1 Entry:179 Library:OA\_TMS\_DB5\_67min\_V3.lib

SI:35 Formula:C13H22O3Si2 CAS:99-06-9 MolWeight:282 RetIndex:1572

CompName:3-Hydroxybenzoic acid-2TMS ; 3-hydroxybenzoic acid

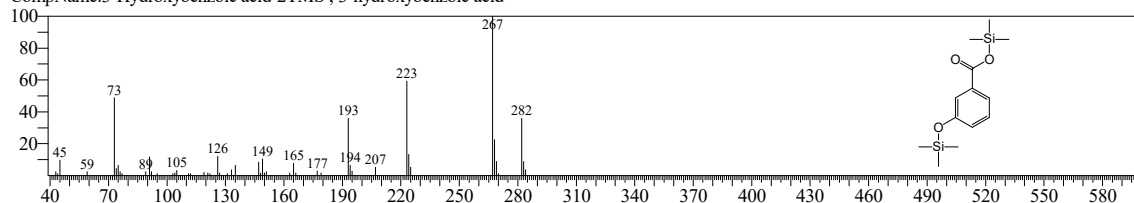

Hit#:2 Entry:351 Library:OA\_TMS\_DB5\_67min\_V3.lib

SI:35 Formula:C18H44O5Si4 CAS:154-58-5 MolWeight:452 RetIndex:1876

CompName:1,5-Anhydro-glucitol-4TMS ; (2R,3S,4R,5S)-2-(hydroxymethyl)oxane-3,4,5-triol

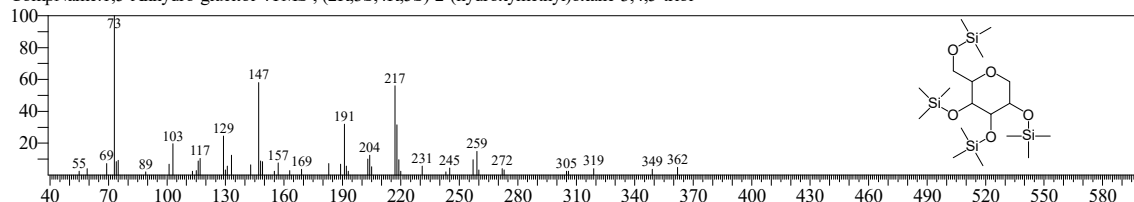

Hit#:3 Entry:535 Library:OA\_TMS\_DB5\_67min\_V3.lib

SI:35 Formula:C22H44N4O5Si4 CAS:58-63-9 MolWeight:556 RetIndex:2605

CompName:Inosine-4TMS ; 9-[(2R,3R,4S,5R)-3,4-dihydroxy-5-(hydroxymethyl)oxolan-2-yl]-3H-purin-6-one

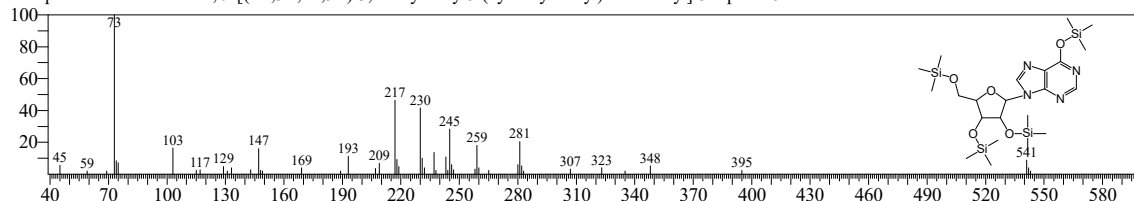

Hit#:4 Entry:441 Library:OA\_TMS\_DB5\_67min\_V3.lib

SI:35 Formula:C24H60O6Si6 CAS:87-89-8 MolWeight:612 RetIndex:2020

CompName:Inositol-6TMS(1) ; cyclohexane-1,2,3,4,5,6-hexol

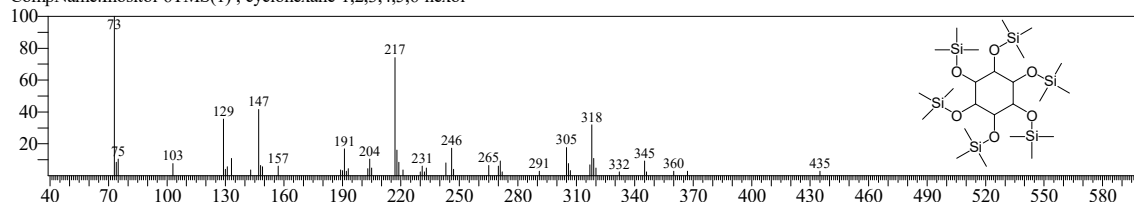

Hit#:5 Entry:211 Library:OA\_TMS\_DB5\_67min\_V3.lib

SI:35 Formula:C13H22O3Si2 CAS:99-96-7 MolWeight:282 RetIndex:1636

CompName:4-Hydroxybenzoic acid-2TMS ; 4-hydroxybenzoic acid

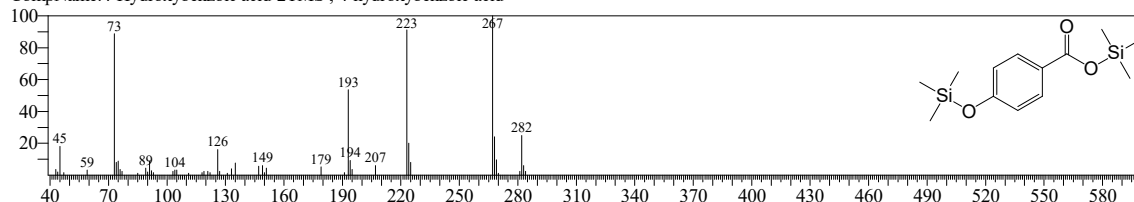



# TNAU

<< Target >>

Line#:23 R.Time:29.315(Scan#:4964) MassPeaks:274

RawMode:Averaged 29.310-29.320(4963-4965) BasePeak:207.05(1332)

BG Mode:Calc. from Peak Group 1 - Event 1 Q3 Scan

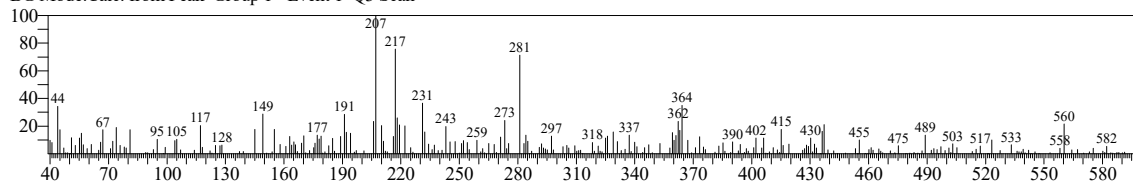

Hit#:1 Entry:559 Library:OA\_TMS\_DB5\_67min\_V3.lib

SI:36 Formula:C39H96O11Si9 CAS:585-88-6 MolWeight:992 RetIndex:2923

CompName:Maltitol-9TMS ; (2S,3R,4R,5R)-4-[(2R,3R,4S,5S,6R)-3,4,5-trihydroxy-6-(hydroxymethyl)oxan-2-yl]oxyhexane-1,2,3,5,6-pentol

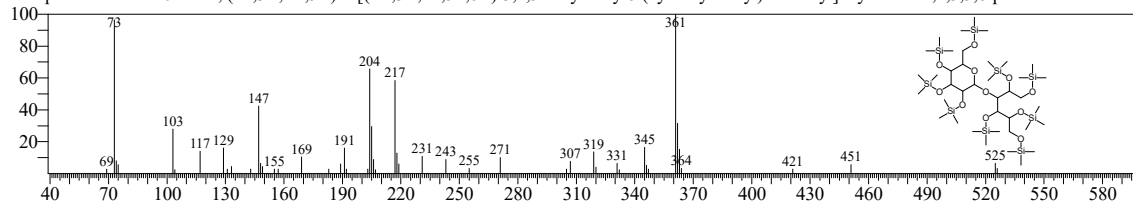

Hit#:2 Entry:552 Library:OA\_TMS\_DB5\_67min\_V3.lib

SI:35 Formula:C36H86O11Si8 CAS:99-20-7 MolWeight:918 RetIndex:2812

CompName:Trehalose-8TMS ; (2R,3S,4S,5R,6R)-2-(hydroxymethyl)-6-[(2R,3R,4S,5S,6R)-3,4,5-trihydroxy-6-(hydroxymethyl)oxan-2-yl]oxyoxane-

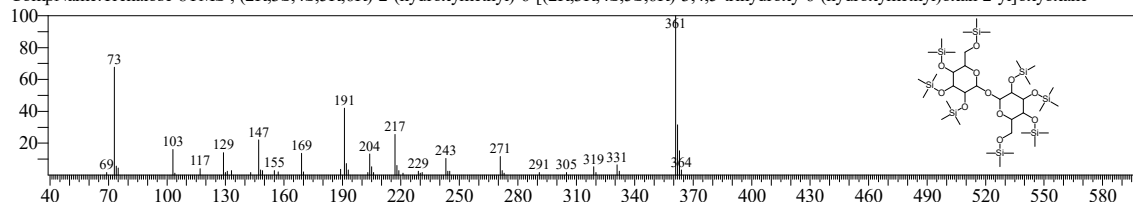

Hit#:3 Entry:541 Library:OA\_TMS\_DB5\_67min\_V3.lib

SI:33 Formula:C36H86O11Si8 CAS:57-50-1 MolWeight:918 RetIndex:2705

CompName:Sucrose-8TMS ; (2R,3R,4S,5S,6R)-2-[(2S,3S,4S,5R)-3,4-dihydroxy-2,5-bis(hydroxymethyl)oxolan-2-yl]oxy-6-(hydroxymethyl)oxane-3

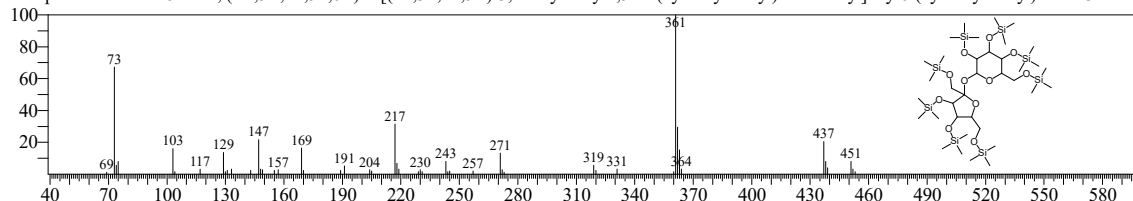

Hit#:4 Entry:560 Library:OA\_TMS\_DB5\_67min\_V3.lib

SI:30 Formula:C37H89NO11Si8 CAS:499-40-1 MolWeight:947 RetIndex:2947

CompName:Isomaltose-meto-8TMS(1) ; (3R,4S,5S,6R)-6-[(2S,3R,4S,5S,6R)-3,4,5-trihydroxy-6-(hydroxymethyl)oxan-2-yl]oxymethyl]oxane-2,3,

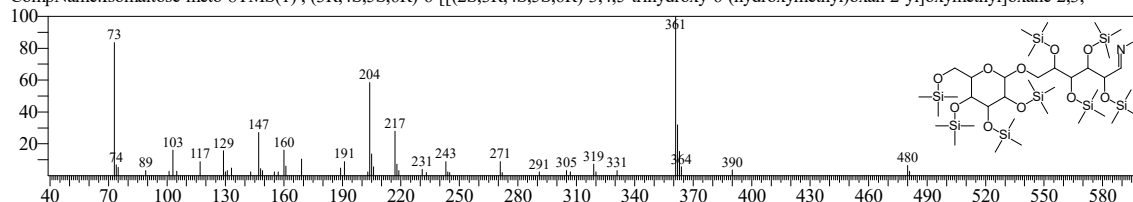

Hit#:5 Entry:326 Library:OA\_TMS\_DB5\_67min\_V3.lib

SI:29 Formula:C21H52O6Si5 CAS:23140-52-5 MolWeight:540 RetIndex:1841

CompName:Psicose-5TMS(2) ; (3R,4R,5R)-1,3,4,5,6-pentahydroxyhexan-2-one

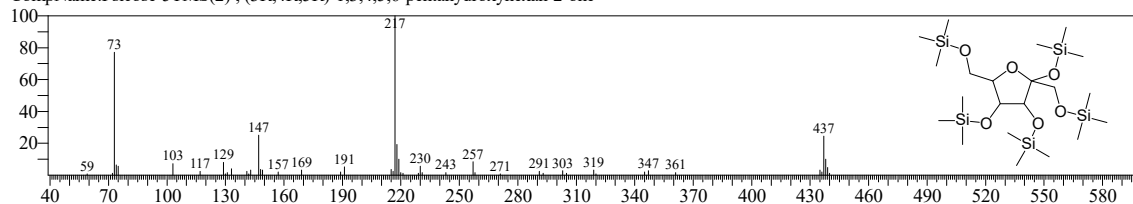

# TNAU

<< Target >>

Line#:24 R.Time:29.355(Scan#:4972) MassPeaks:311

RawMode:Averaged 29.350-29.360(4971-4973) BasePeak:361.20(4490)

BG Mode:Calc. from Peak Group 1 - Event 1 Q3 Scan

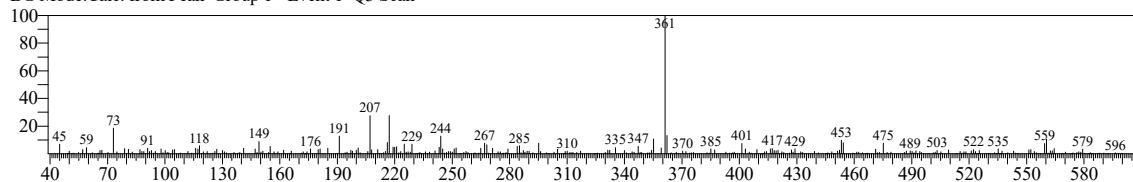

Hit#:1 Entry:552 Library:OA\_TMS\_DB5\_67min\_V3.lib

SI:49 Formula:C36H86O11Si8 CAS:99-20-7 MolWeight:918 RetIndex:2812

CompName:Trehalose-8TMS ; (2R,3S,4S,5R,6R)-2-(hydroxymethyl)-6-[(2R,3R,4S,5S,6R)-3,4,5-trihydroxy-6-(hydroxymethyl)oxan-2-yl]oxyoxane-

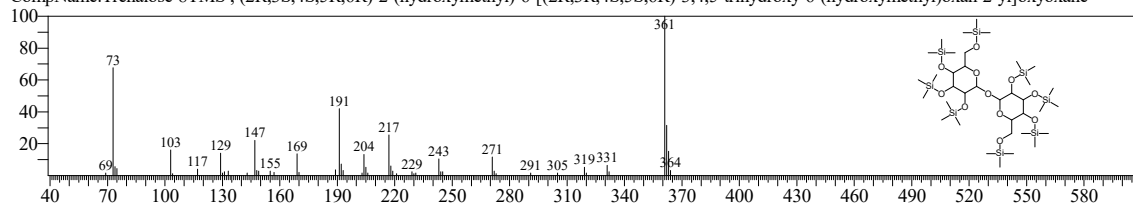

Hit#:2 Entry:541 Library:OA\_TMS\_DB5\_67min\_V3.lib

SI:48 Formula:C36H86O11Si8 CAS:57-50-1 MolWeight:918 RetIndex:2705

CompName:Sucrose-8TMS ; (2R,3R,4S,5S,6R)-2-[(2S,3S,4S,5R)-3,4-dihydroxy-2,5-bis(hydroxymethyl)oxolan-2-yl]oxy-6-(hydroxymethyl)oxane-3



Hit#:3 Entry:561 Library:OA\_TMS\_DB5\_67min\_V3.lib

SI:45 Formula:C37H89NO11Si8 CAS:499-40-1 MolWeight:947 RetIndex:2983

CompName:Isomaltose-meto-8TMS(2) ; (3R,4S,5S,6R)-6-[[[(2S,3R,4S,5S,6R)-3,4,5-trihydroxy-6-(hydroxymethyl)oxan-2-yl]oxymethyl]oxane-2,3,

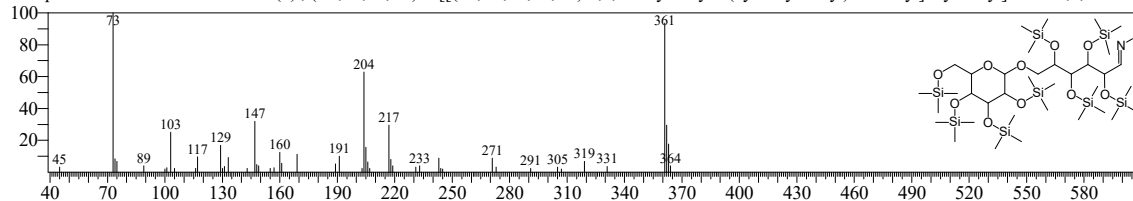

Hit#:4 Entry:553 Library:OA\_TMS\_DB5\_67min\_V3.lib

SI:43 Formula:C37H89NO11Si8 CAS:69-79-4 MolWeight:947 RetIndex:2817

CompName:Maltose-meto-8TMS(1) ; (2R,3S,4S,5R,6R)-2-(hydroxymethyl)-6-[(2R,3S,4R,5R,6R)-4,5,6-trihydroxy-2-(hydroxymethyl)oxan-3-yl]oxy

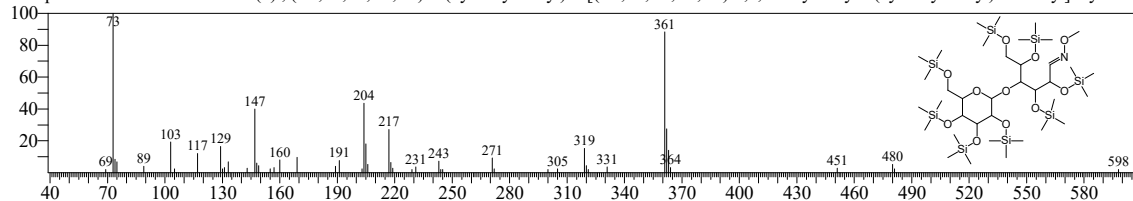

Hit#:5 Entry:559 Library:OA\_TMS\_DB5\_67min\_V3.lib

SI:42 Formula:C39H96O11Si9 CAS:585-88-6 MolWeight:992 RetIndex:2923

CompName:Maltitol-9TMS ; (2S,3R,4R,5R)-4-[(2R,3R,4S,5S,6R)-3,4,5-trihydroxy-6-(hydroxymethyl)oxan-2-yl]oxyhexane-1,2,3,5,6-pentol



<< Target >>

Line#:25 R.Time:29.540(Scan#:5009) MassPeaks:316

RawMode:Averaged 29.535-29.545(5008-5010) BasePeak:361.20(5094)

BG Mode:Calc. from Peak Group 1 - Event 1 Q3 Scan

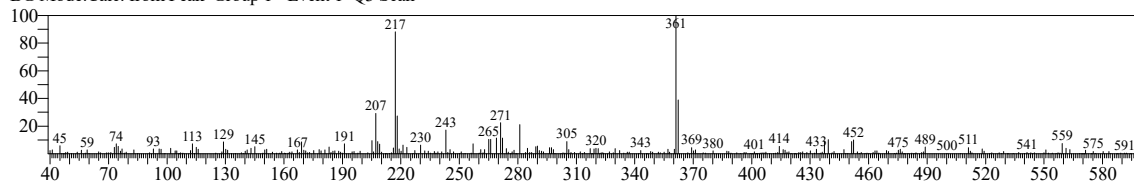

Hit#:1 Entry:541 Library:OA TMS DB5 67min V3.lib

SI:59 Formula:C36H86O11Si8 CAS:57-50-1 MolWeight:918 RetIndex:2705

CompName:Sucrose-8TMS ; (2R,3R,4S,5S,6R)-2-[(2S,3S,4S,5R)-3,4-dihydroxy-2,5-bis(hydroxymethyl)oxolan-2-yl]oxy-6-(hydroxymethyl)oxane-3



Hit#:2 Entry:552 Library:OA TMS DB5 67min V3.lib

SI:55 Formula:C36H86O11Si8 CAS:99-20-7 MolWeight:918 RetIndex:2812

CompName:Trehalose-8TMS ; (2R,3S,4S,5R,6R)-2-(hydroxymethyl)-6-[(2R,3R,4S,5S,6R)-3,4,5-trihydroxy-6-(hydroxymethyl)oxan-2-yl]oxyoxane-

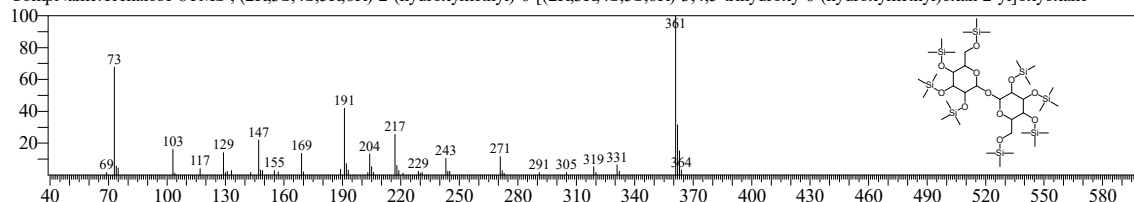

Hit#:3 Entry:559 Library:OA TMS DB5 67min V3.lib

SI:52 Formula:C39H96O11Si9 CAS:585-88-6 MolWeight:992 RetIndex:2923

CompName:Maltitol-9TMS ; (2S,3R,4R,5R)-4-[(2R,3R,4S,5S,6R)-3,4,5-trihydroxy-6-(hydroxymethyl)oxan-2-yl]oxyhexane-1,2,3,5,6-pentol

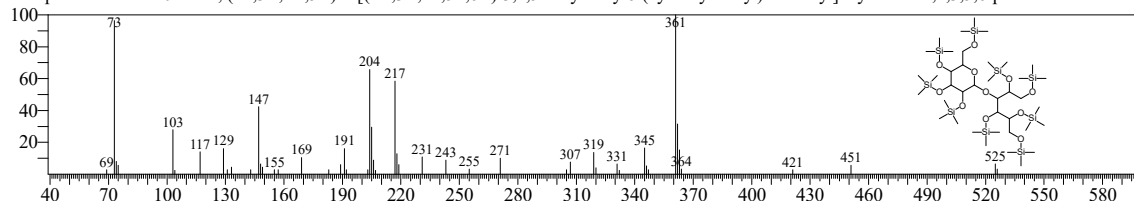

Hit#:4 Entry:560 Library:OA TMS DB5 67min V3.lib

SI:50 Formula:C37H89NO11Si8 CAS:499-40-1 MolWeight:947 RetIndex:2947

CompName:Isomaltose-meto-8TMS(1) ; (3R,4S,5S,6R)-6-[(2S,3R,4S,5S,6R)-3,4,5-trihydroxy-6-(hydroxymethyl)oxan-2-yl]oxymethyl]oxane-2,3,

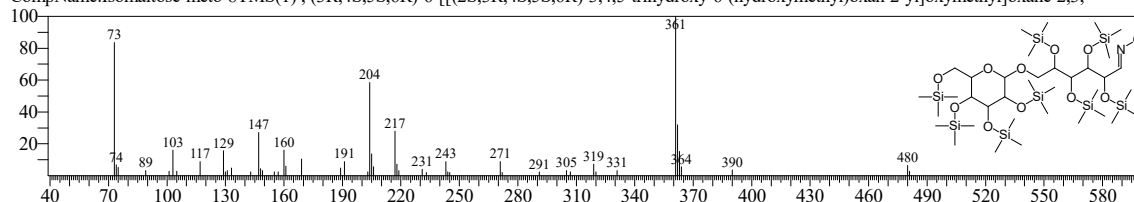

Hit#:5 Entry:553 Library:OA TMS DB5 67min V3.lib

SI:50 Formula:C37H89NO11Si8 CAS:69-79-4 MolWeight:947 RetIndex:2817

CompName:Maltose-meto-8TMS(1) ; (2R,3S,4S,5R,6R)-2-(hydroxymethyl)-6-[(2R,3S,4R,5R,6R)-4,5,6-trihydroxy-2-(hydroxymethyl)oxan-3-yl]oxy

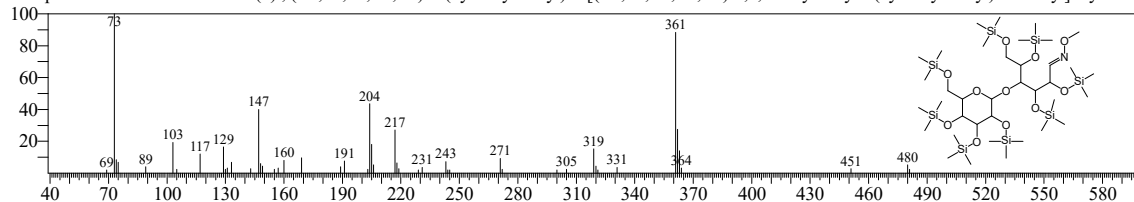

# TNAU

<< Target >>

Line#:26 R.Time:29.690(Scan#:5039) MassPeaks:275

RawMode:Averaged 29.685-29.695(5038-5040) BasePeak:207.05(873)

BG Mode:Calc. from Peak Group 1 - Event 1 Q3 Scan

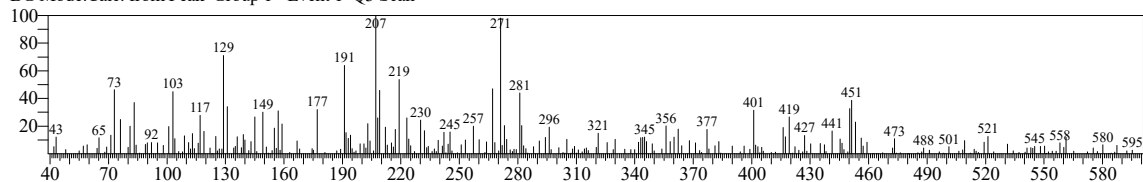

Hit#:1 Entry:351 Library:OA\_TMS\_DB5\_67min\_V3.lib

SI:33 Formula:C18H44O5Si4 CAS:154-58-5 MolWeight:452 RetIndex:1876

CompName:1,5-Anhydro-glucitol-4TMS ; (2R,3S,4R,5S)-2-(hydroxymethyl)oxane-3,4,5-triol

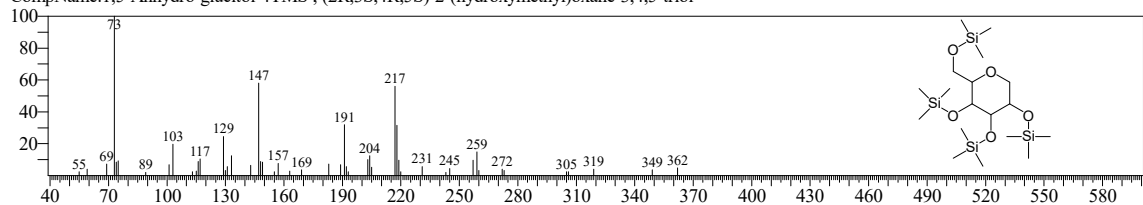

Hit#:2 Entry:561 Library:OA\_TMS\_DB5\_67min\_V3.lib

SI:32 Formula:C37H89NO11Si8 CAS:499-40-1 MolWeight:947 RetIndex:2983

CompName:Isomaltose-meto-8TMS(2) ; (3R,4S,5S,6R)-6-[[[(2S,3R,4S,5S,6R)-3,4,5-trihydroxy-6-(hydroxymethyl)oxan-2-yl]oxymethyl]oxane-2,3,

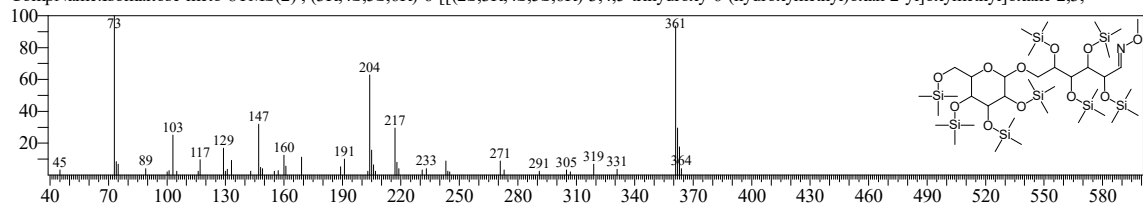

Hit#:3 Entry:535 Library:OA\_TMS\_DB5\_67min\_V3.lib

SI:31 Formula:C22H44N4O5Si4 CAS:58-63-9 MolWeight:556 RetIndex:2605

CompName:Inosine-4TMS ; 9-[(2R,3R,4S,5R)-3,4-dihydroxy-5-(hydroxymethyl)oxolan-2-yl]-3H-purin-6-one

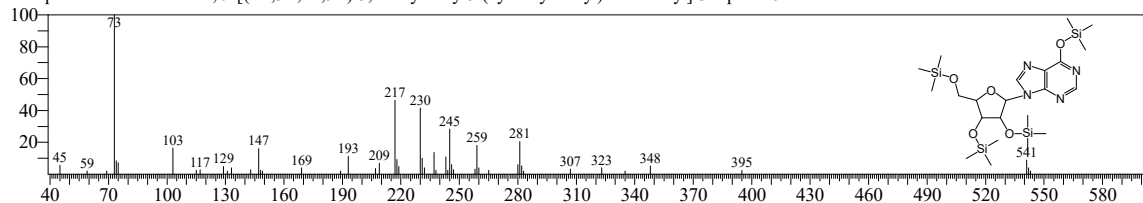

Hit#:4 Entry:306 Library:OA\_TMS\_DB5\_67min\_V3.lib

SI:31 Formula:C18H44O5Si4 CAS:154-17-6 MolWeight:452 RetIndex:1816

CompName:2-Deoxy-glucose-4TMS(2) ; (2S,4S,5S,6S)-6-(hydroxymethyl)oxane-2,4,5-triol

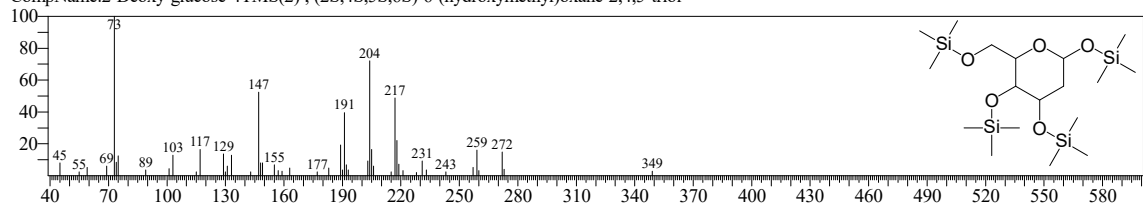

Hit#:5 Entry:210 Library:OA\_TMS\_DB5\_67min\_V3.lib

SI:31 Formula:C17H42O5Si4 CAS:10323-20-3 MolWeight:438 RetIndex:1634

CompName:Arabinose-4TMS(1) ; (2S,3R,4R)-2,3,4,5-tetrahydroxypentanal

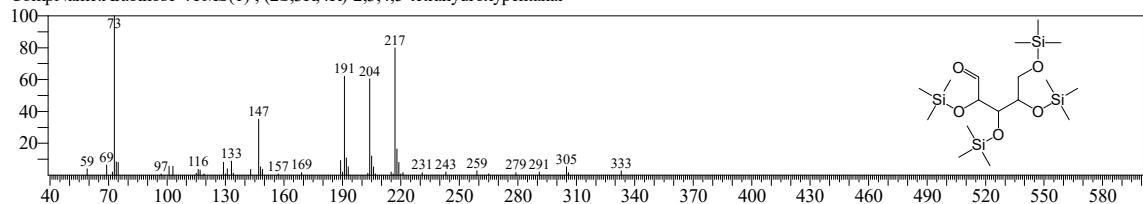

# TNAU

<< Target >>

Line#:27 R.Time:29.790(Scan#:5059) MassPeaks:319

RawMode:Averaged 29.785-29.795(5058-5060) BasePeak:217.10(3655)

BG Mode:Calc. from Peak Group 1 - Event 1 Q3 Scan

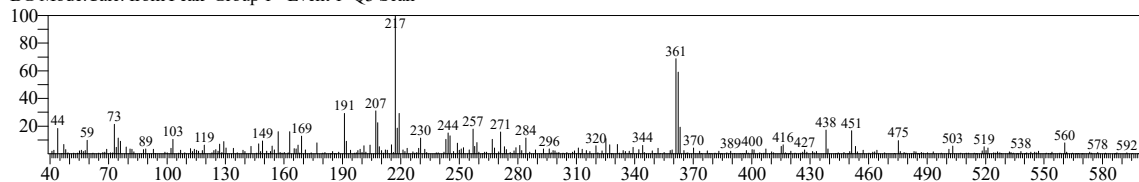

Hit#:1 Entry:541 Library:OA TMS DB5 67min V3.lib

SI:60 Formula:C36H86O11Si8 CAS:57-50-1 MolWeight:918 RetIndex:2705

CompName:Sucrose-8TMS ; (2R,3R,4S,5S,6R)-2-[(2S,3S,4S,5R)-3,4-dihydroxy-2,5-bis(hydroxymethyl)oxolan-2-yl]oxy-6-(hydroxymethyl)oxane-3

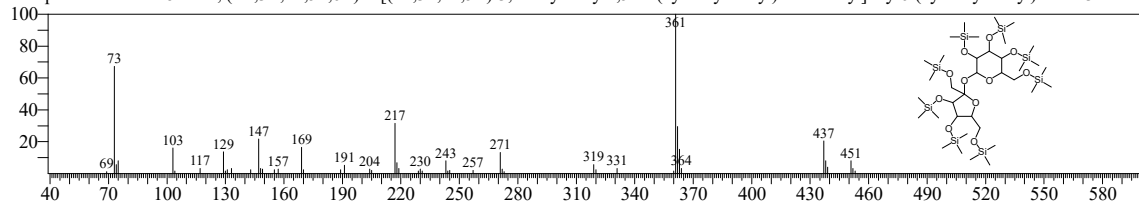

Hit#:2 Entry:552 Library:OA TMS DB5 67min V3.lib

SI:59 Formula:C36H86O11Si8 CAS:99-20-7 MolWeight:918 RetIndex:2812

CompName:Trehalose-8TMS ; (2R,3S,4S,5R,6R)-2-(hydroxymethyl)-6-[(2R,3R,4S,5S,6R)-3,4,5-trihydroxy-6-(hydroxymethyl)oxan-2-yl]oxyoxane-

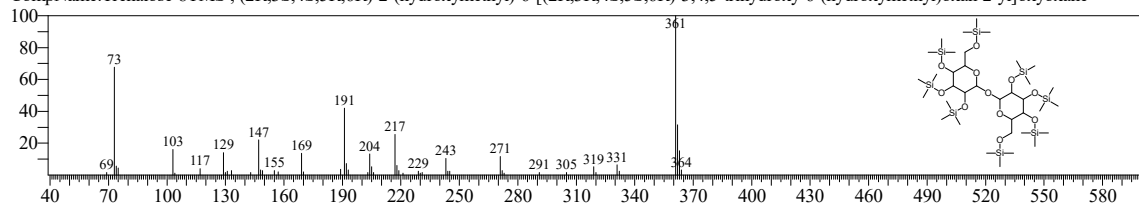

Hit#:3 Entry:559 Library:OA TMS DB5 67min V3.lib

SI:56 Formula:C39H96O11Si9 CAS:585-88-6 MolWeight:992 RetIndex:2923

CompName:Maltitol-9TMS ; (2S,3R,4R,5R)-4-[(2R,3R,4S,5S,6R)-3,4,5-trihydroxy-6-(hydroxymethyl)oxan-2-yl]oxyhexane-1,2,3,5,6-pentol

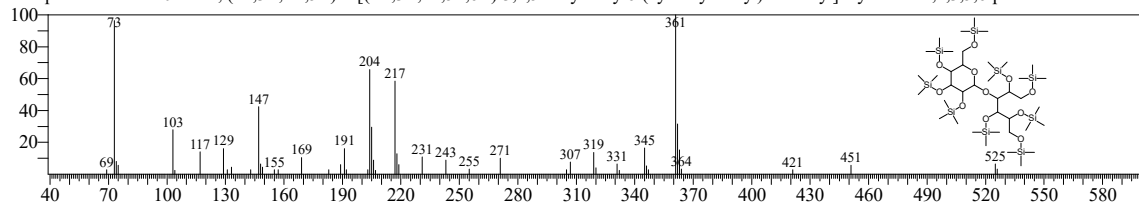

Hit#:4 Entry:561 Library:OA TMS DB5 67min V3.lib

SI:55 Formula:C37H89NO11Si8 CAS:499-40-1 MolWeight:947 RetIndex:2983

CompName:Isomaltose-meto-8TMS(2) ; (3R,4S,5S,6R)-6-[(2S,3R,4S,5S,6R)-3,4,5-trihydroxy-6-(hydroxymethyl)oxan-2-yl]oxymethyl]oxane-2,3,

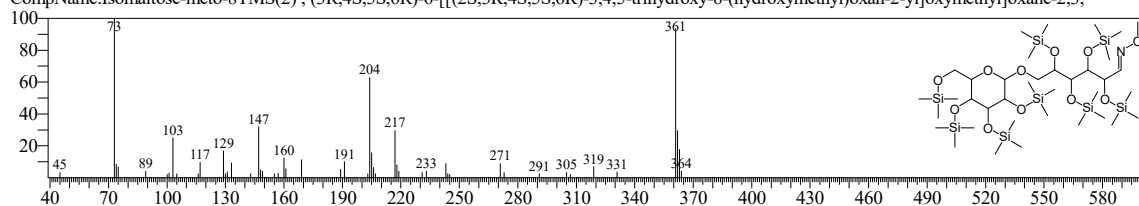

Hit#:5 Entry:553 Library:OA TMS DB5 67min V3.lib

SI:54 Formula:C37H89NO11Si8 CAS:69-79-4 MolWeight:947 RetIndex:2817

CompName:Maltose-meto-8TMS(1) ; (2R,3S,4S,5R,6R)-2-(hydroxymethyl)-6-[(2R,3S,4R,5R,6R)-4,5,6-trihydroxy-2-(hydroxymethyl)oxan-3-yl]oxy

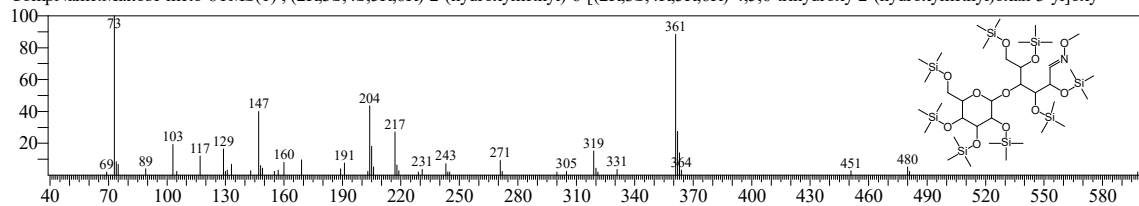

# TNAU

<< Target >>

Line#:28 R.Time:29.920(Scan#:5085) MassPeaks:302

RawMode:Averaged 29.915-29.925(5084-5086) BasePeak:217.10(1381)

BG Mode:Calc. from Peak Group 1 - Event 1 Q3 Scan

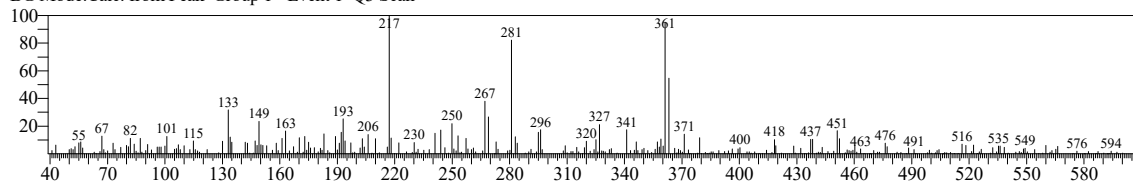

Hit#:1 Entry:541 Library:OA\_TMS\_DB5\_67min\_V3.lib

SI:37 Formula:C36H86O11Si8 CAS:57-50-1 MolWeight:918 RetIndex:2705

CompName:Sucrose-8TMS ; (2R,3R,4S,5S,6R)-2-[(2S,3S,4S,5R)-3,4-dihydroxy-2,5-bis(hydroxymethyl)oxolan-2-yl]oxy-6-(hydroxymethyl)oxane-3

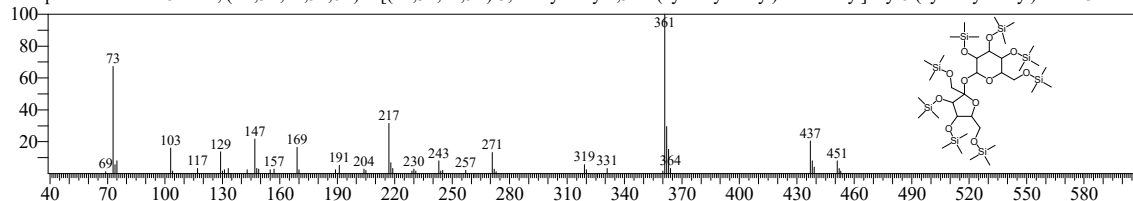

Hit#:2 Entry:552 Library:OA\_TMS\_DB5\_67min\_V3.lib

SI:34 Formula:C36H86O11Si8 CAS:99-20-7 MolWeight:918 RetIndex:2812

CompName:Trehalose-8TMS ; (2R,3S,4S,5R,6R)-2-(hydroxymethyl)-6-[(2R,3R,4S,5S,6R)-3,4,5-trihydroxy-6-(hydroxymethyl)oxan-2-yl]oxyoxane-

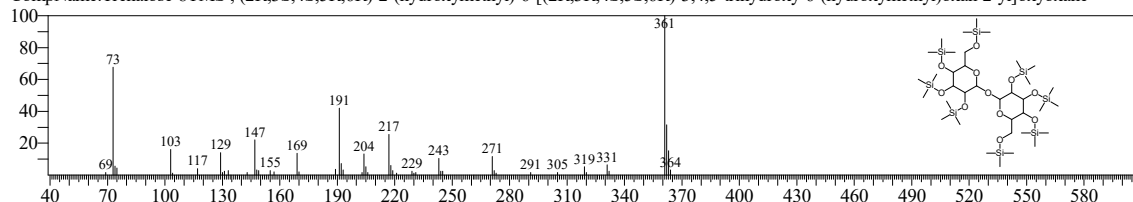

Hit#:3 Entry:559 Library:OA\_TMS\_DB5\_67min\_V3.lib

SI:33 Formula:C39H96O11Si9 CAS:585-88-6 MolWeight:992 RetIndex:2923

CompName:Maltitol-9TMS ; (2S,3R,4R,5R)-4-[(2R,3R,4S,5S,6R)-3,4,5-trihydroxy-6-(hydroxymethyl)oxan-2-yl]oxyhexane-1,2,3,5,6-pentol

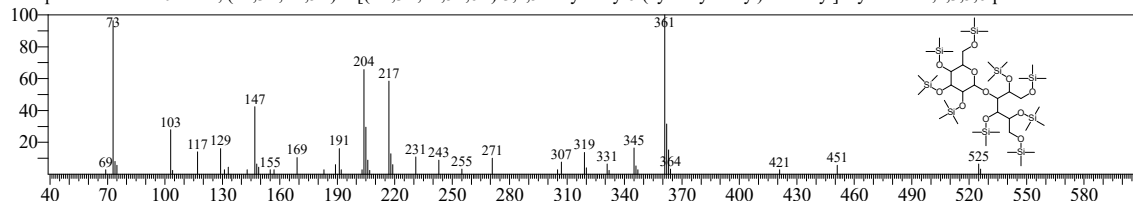

Hit#:4 Entry:560 Library:OA\_TMS\_DB5\_67min\_V3.lib

SI:32 Formula:C37H89NO11Si8 CAS:499-40-1 MolWeight:947 RetIndex:2947

CompName:Isomaltose-meto-8TMS(1) ; (3R,4S,5S,6R)-6-[(2S,3R,4S,5S,6R)-3,4,5-trihydroxy-6-(hydroxymethyl)oxan-2-yl]oxymethyl]oxane-2,3,



Hit#:5 Entry:326 Library:OA\_TMS\_DB5\_67min\_V3.lib

SI:31 Formula:C21H52O6Si5 CAS:23140-52-5 MolWeight:540 RetIndex:1841

CompName:Psicose-5TMS(2) ; (3R,4R,5R)-1,3,4,5,6-pentahydroxyhexan-2-one

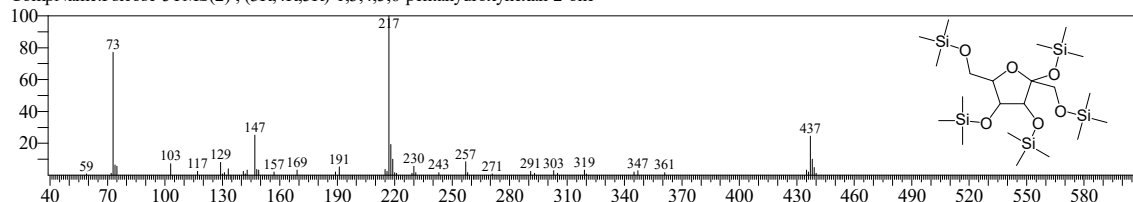

# TNAU

<< Target >>

Line#:29 R.Time:30.010(Scan#:5103) MassPeaks:279

RawMode:Averaged 30.005-30.015(5102-5104) BasePeak:217.10(1446)

BG Mode:Calc. from Peak Group 1 - Event 1 Q3 Scan

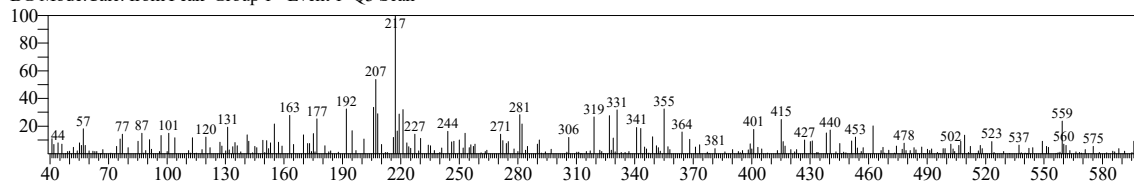

Hit#:1 Entry:230 Library:OA TMS DB5\_67min\_V3.lib

SI:27 Formula:C17H42O5Si4 CAS:50-69-1 MolWeight:438 RetIndex:1666

CompName:Ribose-4TMS(2) ; (3R,4S,5R)-5-(hydroxymethyl)oxolane-2,3,4-triol

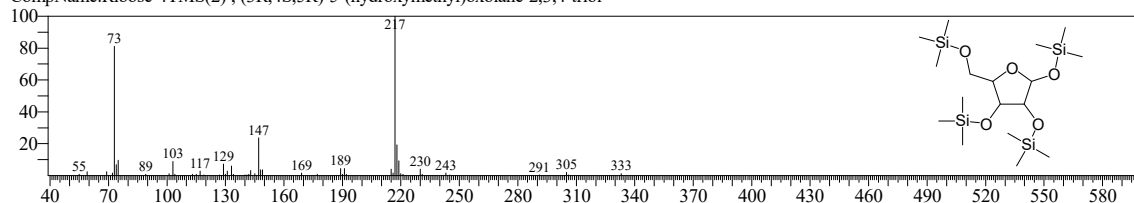

Hit#:2 Entry:326 Library:OA TMS DB5\_67min\_V3.lib

SI:27 Formula:C21H52O6Si5 CAS:23140-52-5 MolWeight:540 RetIndex:1841

CompName:Psicose-5TMS(2) ; (3R,4R,5R)-1,3,4,5,6-pentahydroxyhexan-2-one

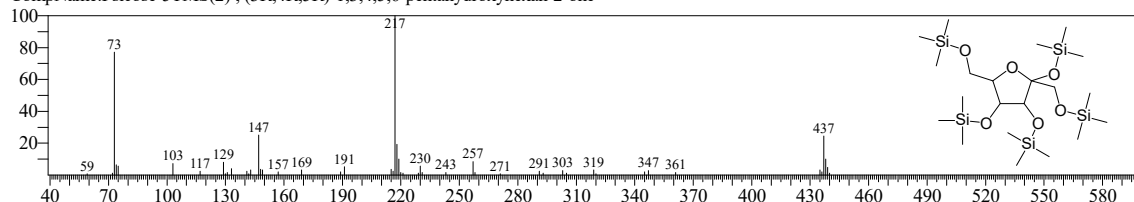

Hit#:3 Entry:413 Library:OA TMS DB5\_67min\_V3.lib

SI:20 Formula:C18H35NO3Si3 CAS:60-18-4 MolWeight:397 RetIndex:1958

CompName:Tyrosine-3TMS ; (2S)-2-amino-3-(4-hydroxyphenyl)propanoic acid

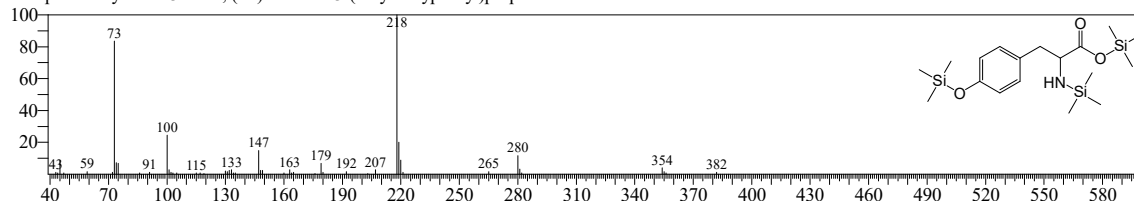

Hit#:4 Entry:506 Library:OA TMS DB5\_67min\_V3.lib

SI:19 Formula:C19H36N2O4Si3 CAS:2147-61-7 MolWeight:440 RetIndex:2375

CompName:3-Hydroxy-kynurenine-3TMS ; 2-amino-4-(2-amino-3-hydroxyphenyl)-4-oxobutanoic acid

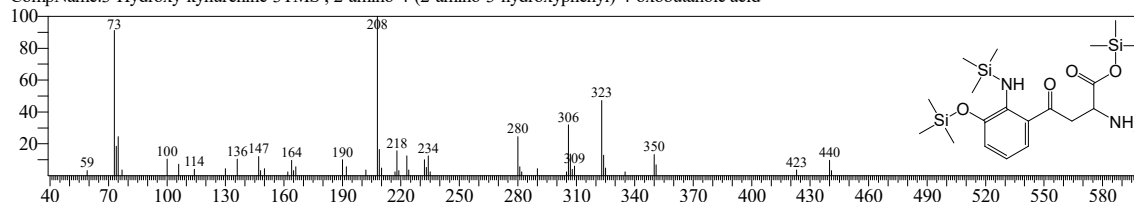

Hit#:5 Entry:412 Library:OA TMS DB5\_67min\_V3.lib

SI:19 Formula: CAS:0-00-0 MolWeight:403 RetIndex:1957

CompName:Tyrosine-13C6-3TMS ;

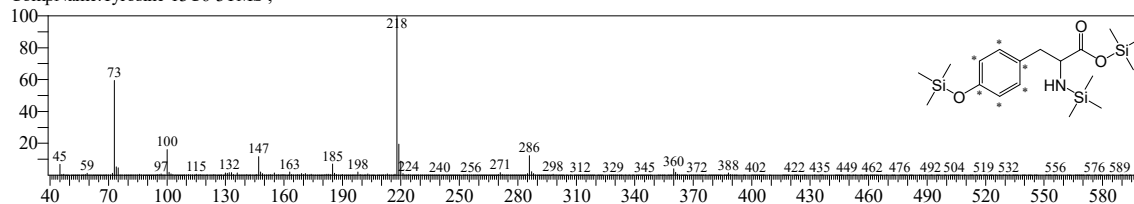

# TNAU

<< Target >>

Line#:30 R.Time:30.065(Scan#:5114) MassPeaks:297

RawMode:Averaged 30.060-30.070(5113-5115) BasePeak:73.05(1174)

BG Mode:Calc. from Peak Group 1 - Event 1 Q3 Scan

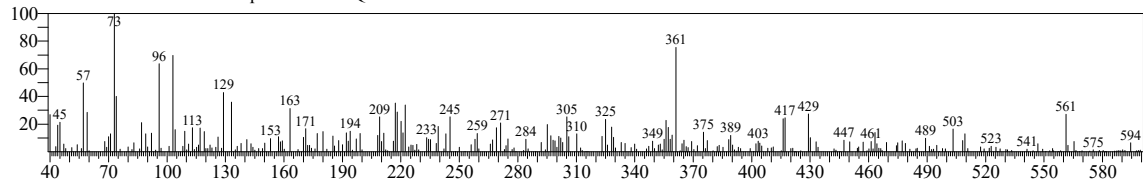

Hit#:1 Entry:561 Library:OA\_TMS\_DB5\_67min\_V3.lib

SI:37 Formula:C37H89NO11Si8 CAS:499-40-1 MolWeight:947 RetIndex:2983

CompName:Isomaltose-meto-8TMS(2); (3R,4S,5S,6R)-6-[(2S,3R,4S,5S,6R)-3,4,5-trihydroxy-6-(hydroxymethyl)oxan-2-yl]oxymethyl]oxane-2,3,

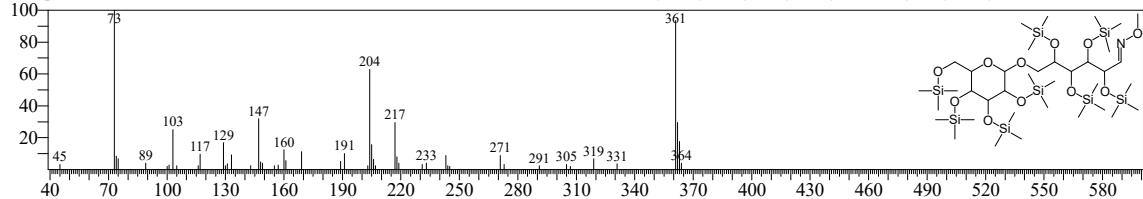

Hit#:2 Entry:351 Library:OA\_TMS\_DB5\_67min\_V3.lib

SI:37 Formula:C18H44O5Si4 CAS:154-58-5 MolWeight:452 RetIndex:1876

CompName:1,5-Anhydro-glucitol-4TMS; (2R,3S,4R,5S)-2-(hydroxymethyl)oxane-3,4,5-triol

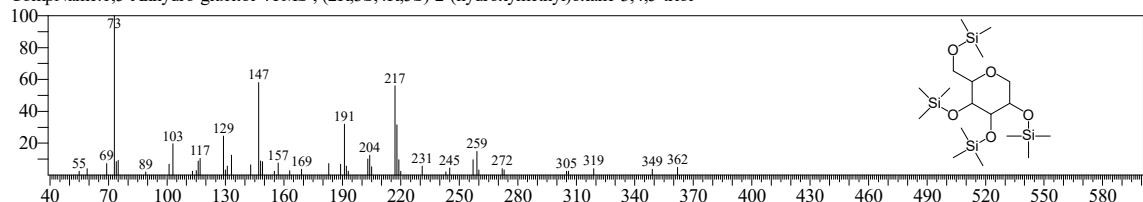

Hit#:3 Entry:556 Library:OA\_TMS\_DB5\_67min\_V3.lib

SI:36 Formula:C37H89NO11Si8 CAS:69-79-4 MolWeight:947 RetIndex:2846

CompName:Maltose-meto-8TMS(2); (2R,3S,4S,5R,6R)-2-(hydroxymethyl)-6-[(2R,3S,4R,5R,6R)-4,5,6-trihydroxy-2-(hydroxymethyl)oxan-3-yl]oxy

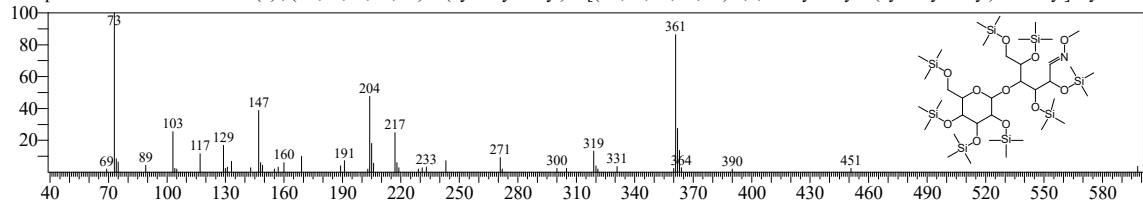

Hit#:4 Entry:559 Library:OA\_TMS\_DB5\_67min\_V3.lib

SI:36 Formula:C39H96O11Si9 CAS:585-88-6 MolWeight:992 RetIndex:2923

CompName:Maltitol-9TMS; (2S,3R,4R,5R)-4-[(2R,3R,4S,5S,6R)-3,4,5-trihydroxy-6-(hydroxymethyl)oxan-2-yl]oxyhexane-1,2,3,5,6-pentol

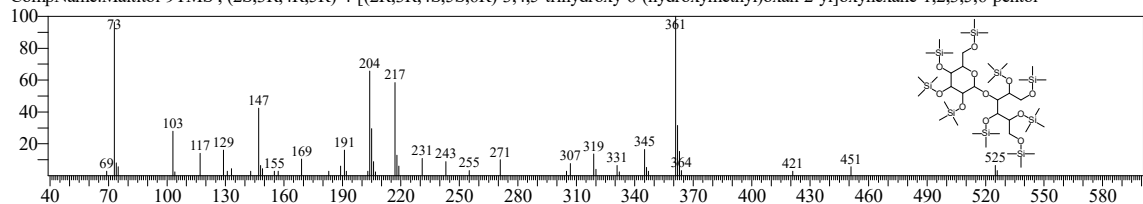

Hit#:5 Entry:552 Library:OA\_TMS\_DB5\_67min\_V3.lib

SI:36 Formula:C36H86O11Si8 CAS:99-20-7 MolWeight:918 RetIndex:2812

CompName:Trehalose-8TMS; (2R,3S,4S,5R,6R)-2-(hydroxymethyl)-6-[(2R,3R,4S,5S,6R)-3,4,5-trihydroxy-6-(hydroxymethyl)oxan-2-yl]oxyoxane-

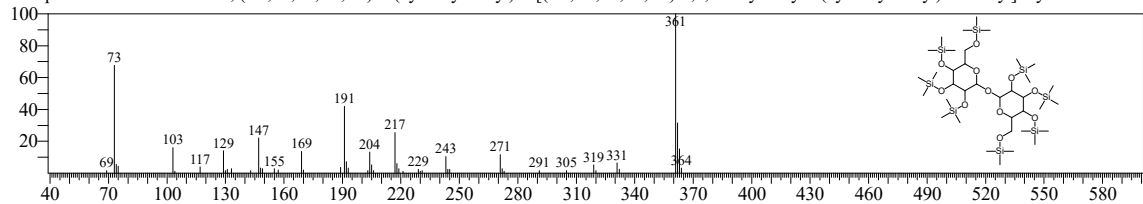



# TNAU

<< Target >>

Line#:31 R.Time:30.090(Scan#:5119) MassPeaks:298

RawMode:Averaged 30.085-30.095(5118-5120) BasePeak:361.20(1830)

BG Mode:Calc. from Peak Group 1 - Event 1 Q3 Scan

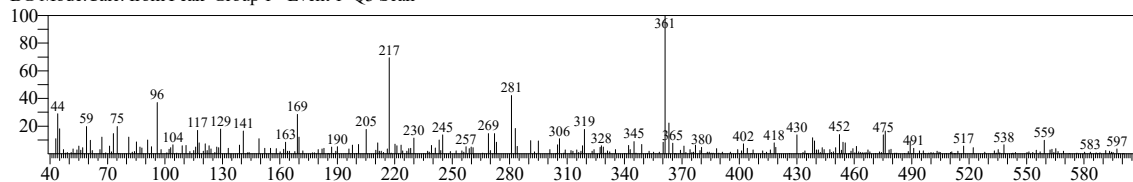

Hit#:1 Entry:541 Library:OA\_TMS\_DB5\_67min\_V3.lib

SI:47 Formula:C36H86O11Si8 CAS:57-50-1 MolWeight:918 RetIndex:2705

CompName:Sucrose-8TMS ; (2R,3R,4S,5S,6R)-2-[(2S,3S,4S,5R)-3,4-dihydroxy-2,5-bis(hydroxymethyl)oxolan-2-yl]oxy-6-(hydroxymethyl)oxane-3

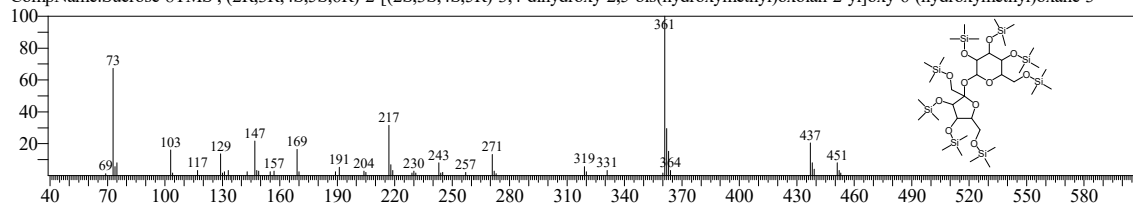

Hit#:2 Entry:552 Library:OA\_TMS\_DB5\_67min\_V3.lib

SI:43 Formula:C36H86O11Si8 CAS:99-20-7 MolWeight:918 RetIndex:2812

CompName:Trehalose-8TMS ; (2R,3S,4S,5R,6R)-2-(hydroxymethyl)-6-[(2R,3R,4S,5S,6R)-3,4,5-trihydroxy-6-(hydroxymethyl)oxan-2-yl]oxyoxane-



Hit#:3 Entry:559 Library:OA\_TMS\_DB5\_67min\_V3.lib

SI:42 Formula:C39H96O11Si9 CAS:585-88-6 MolWeight:992 RetIndex:2923

CompName:Maltitol-9TMS ; (2S,3R,4R,5R)-4-[(2R,3R,4S,5S,6R)-3,4,5-trihydroxy-6-(hydroxymethyl)oxan-2-yl]oxyhexane-1,2,3,5,6-pentol

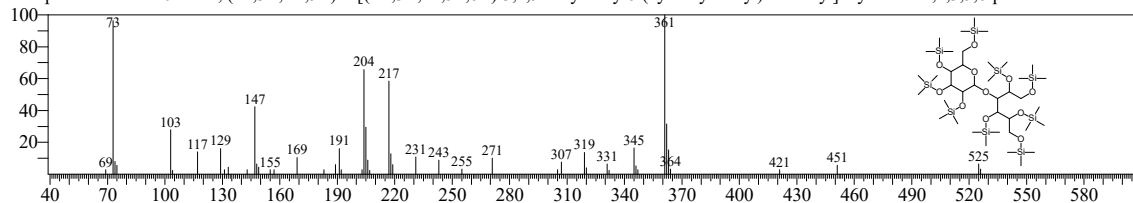

Hit#:4 Entry:561 Library:OA\_TMS\_DB5\_67min\_V3.lib

SI:41 Formula:C37H89NO11Si8 CAS:499-40-1 MolWeight:947 RetIndex:2983

CompName:Isomaltose-meto-8TMS(2) ; (3R,4S,5S,6R)-6-[(2S,3R,4S,5S,6R)-3,4,5-trihydroxy-6-(hydroxymethyl)oxan-2-yl]oxymethyl]oxane-2,3,

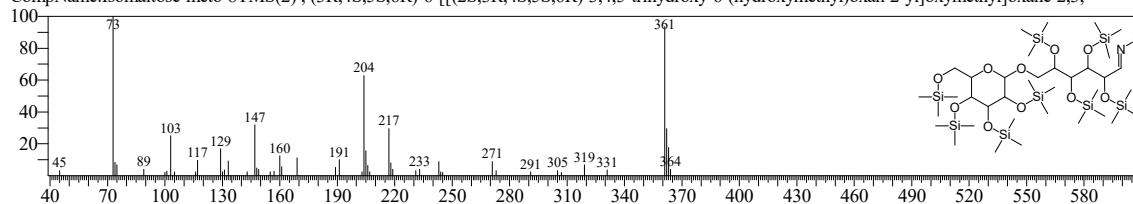

Hit#:5 Entry:553 Library:OA\_TMS\_DB5\_67min\_V3.lib

SI:41 Formula:C37H89NO11Si8 CAS:69-79-4 MolWeight:947 RetIndex:2817

CompName:Maltose-meto-8TMS(1) ; (2R,3S,4S,5R,6R)-2-(hydroxymethyl)-6-[(2R,3S,4R,5R,6R)-4,5,6-trihydroxy-2-(hydroxymethyl)oxan-3-yl]oxy

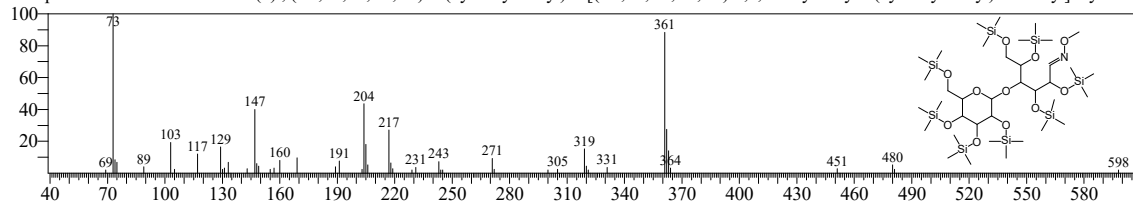

# TNAU

<< Target >>

Line#:32 R.Time:30.765(Scan#:5254) MassPeaks:308

RawMode:Averaged 30.760-30.770(5253-5255) BasePeak:208.05(781)

BG Mode:Calc. from Peak Group 1 - Event 1 Q3 Scan

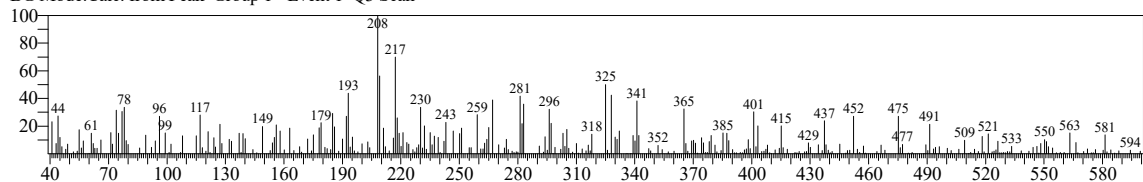

Hit#:1 Entry:506 Library:OA\_TMS\_DB5\_67min\_V3.lib

SI:25 Formula:C<sub>19</sub>H<sub>36</sub>N<sub>2</sub>O<sub>4</sub>Si<sub>3</sub> CAS:2147-61-7 MolWeight:440 RetIndex:2375

CompName:3-Hydroxy-kynurenine-3-TMS ; 2-amino-4-(2-amino-3-hydroxyphenyl)-4-oxobutanoic acid

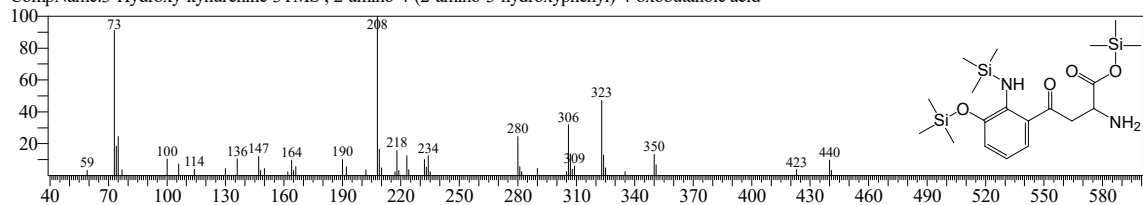

Hit#:2 Entry:227 Library:OA\_TMS\_DB5\_67min\_V3.lib

SI:21 Formula:C<sub>17</sub>H<sub>42</sub>O<sub>5</sub>Si<sub>4</sub> CAS:50-69-1 MolWeight:438 RetIndex:1657

CompName:Ribose-4TMS(1) ; (3R,4S,5R)-5-(hydroxymethyl)oxolane-2,3,4-triol

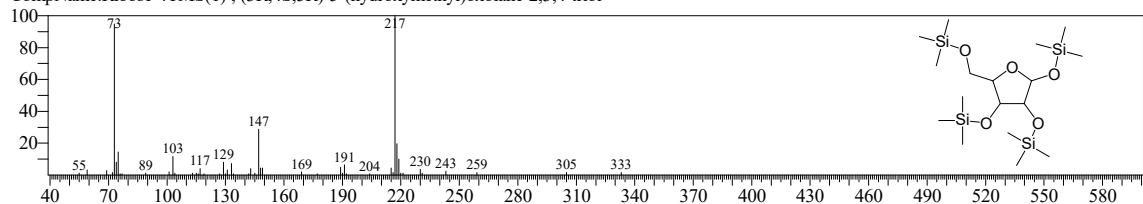

Hit#:3 Entry:341 Library:OA\_TMS\_DB5\_67min\_V3.lib

SI:20 Formula:C<sub>18</sub>H<sub>34</sub>O<sub>4</sub>Si<sub>3</sub> CAS:3247-75-4 MolWeight:398 RetIndex:1864

CompName:3-(3-Hydroxyphenyl)-3-hydroxypropionic acid-3TMS ; 3-hydroxy-3-(3-hydroxyphenyl)propanoic acid

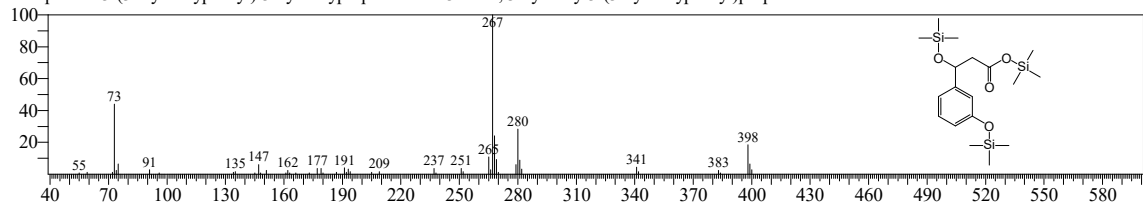

Hit#:4 Entry:211 Library:OA\_TMS\_DB5\_67min\_V3.lib

SI:20 Formula:C<sub>13</sub>H<sub>22</sub>O<sub>3</sub>Si<sub>2</sub> CAS:99-96-7 MolWeight:282 RetIndex:1636

CompName:4-Hydroxybenzoic acid-2TMS ; 4-hydroxybenzoic acid

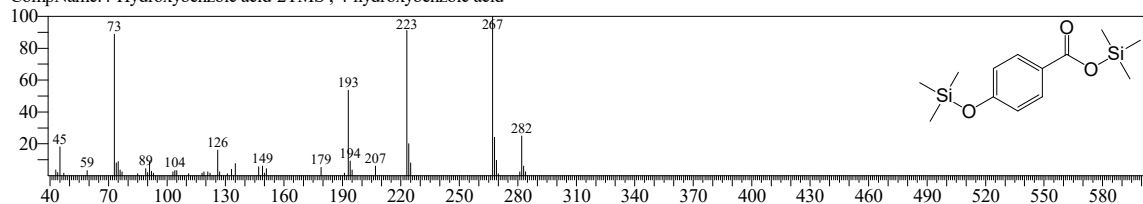

Hit#:5 Entry:179 Library:OA\_TMS\_DB5\_67min\_V3.lib

SI:20 Formula:C<sub>13</sub>H<sub>22</sub>O<sub>3</sub>Si<sub>2</sub> CAS:99-06-9 MolWeight:282 RetIndex:1572

CompName:3-Hydroxybenzoic acid-2TMS ; 3-hydroxybenzoic acid

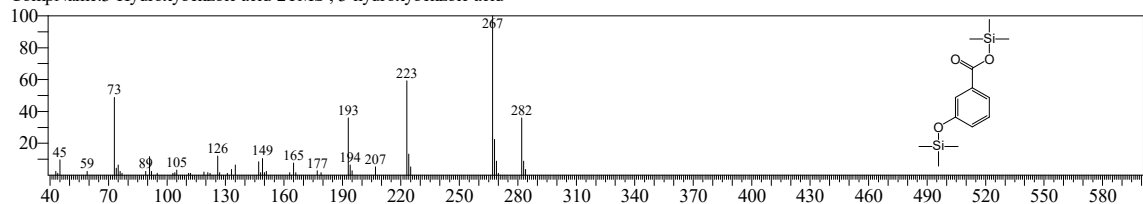

# TNAU

<< Target >>

Line#:33 R.Time:30.835(Scan#:5268) MassPeaks:314

RawMode:Averaged 30.830-30.840(5267-5269) BasePeak:207.05(1336)

BG Mode:Calc. from Peak Group 1 - Event 1 Q3 Scan

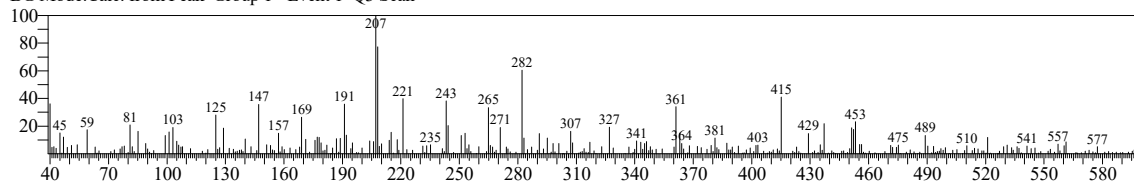

Hit#:1 Entry:552 Library:OA TMS DB5 67min V3.lib

SI:32 Formula:C36H86O11Si8 CAS:99-20-7 MolWeight:918 RetIndex:2812

CompName:Trehalose-8TMS ; (2R,3S,4S,5R,6R)-2-(hydroxymethyl)-6-[(2R,3R,4S,5S,6R)-3,4,5-trihydroxy-6-(hydroxymethyl)oxan-2-yl]oxyoxane-

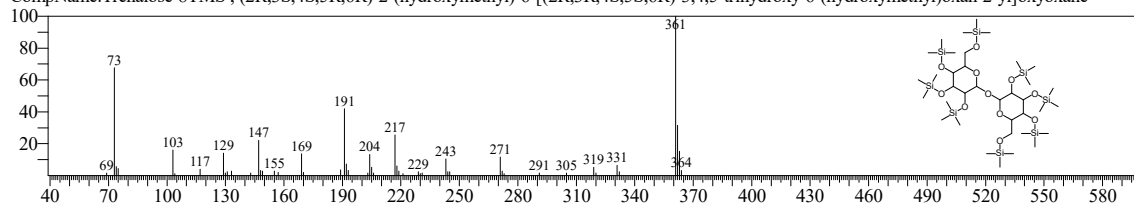

Hit#:2 Entry:541 Library:OA TMS DB5 67min V3.lib

SI:31 Formula:C36H86O11Si8 CAS:57-50-1 MolWeight:918 RetIndex:2705

CompName:Sucrose-8TMS ; (2R,3R,4S,5S,6R)-2-[(2S,3S,4S,5R)-3,4-dihydroxy-2,5-bis(hydroxymethyl)oxolan-2-yl]oxy-6-(hydroxymethyl)oxane-3

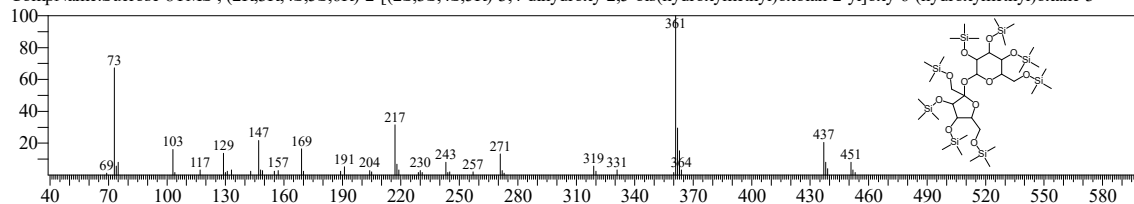

Hit#:3 Entry:559 Library:OA TMS DB5 67min V3.lib

SI:30 Formula:C39H96O11Si9 CAS:585-88-6 MolWeight:992 RetIndex:2923

CompName:Maltitol-9TMS ; (2S,3R,4R,5R)-4-[(2R,3R,4S,5S,6R)-3,4,5-trihydroxy-6-(hydroxymethyl)oxan-2-yl]oxyhexane-1,2,3,5,6-pentol

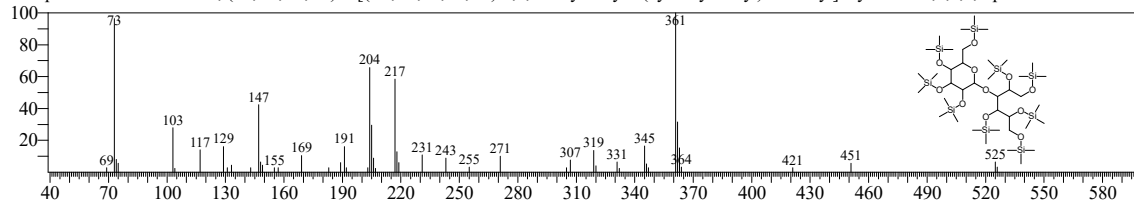

Hit#:4 Entry:560 Library:OA TMS DB5 67min V3.lib

SI:27 Formula:C37H89NO11Si8 CAS:499-40-1 MolWeight:947 RetIndex:2947

CompName:Isomaltose-meto-8TMS(1) ; (3R,4S,5S,6R)-6-[[[(2S,3R,4S,5S,6R)-3,4,5-trihydroxy-6-(hydroxymethyl)oxan-2-yl]oxymethyl]oxane-2,3,

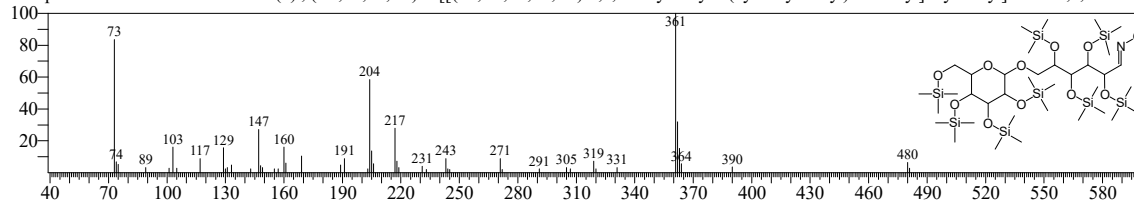

Hit#:5 Entry:310 Library:OA TMS DB5 67min V3.lib

SI:24 Formula:C11H20N4OSi2 CAS:68-94-0 MolWeight:280 RetIndex:1822

CompName:Hypoxanthine-2TMS ; 3,7-dihydropurin-6-one

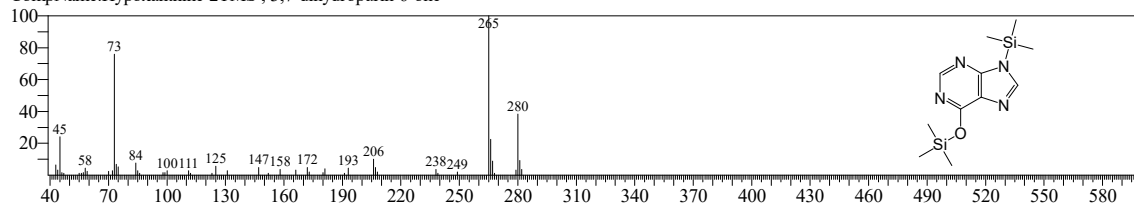

# TNAU

<< Target >>

Line#:34 R.Time:30.965(Scan#:5294) MassPeaks:290

RawMode:Averaged 30.960-30.970(5293-5295) BasePeak:207.05(1334)

BG Mode:Calc. from Peak Group 1 - Event 1 Q3 Scan

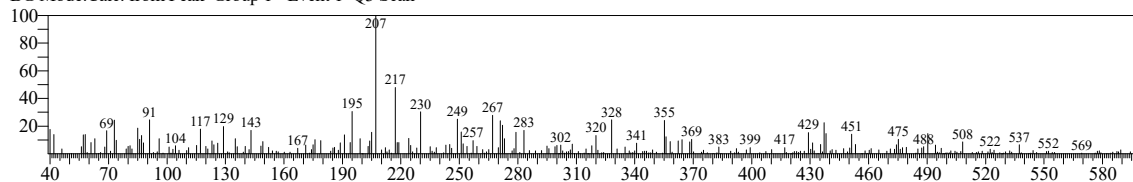

Hit#:1 Entry:334 Library:OA\_TMS\_DB5\_67min\_V3.lib

SI:36 Formula:C<sub>21</sub>H<sub>52</sub>O<sub>6</sub>Si<sub>5</sub> CAS:57-48-7 MolWeight:540 RetIndex:1852

CompName:Fructose-5TMS(3); (3S,4R,5R)-1,3,4,5,6-pentahydroxyhexan-2-one

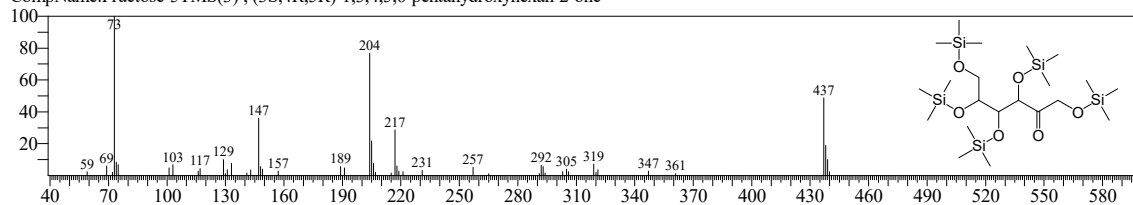

Hit#:2 Entry:360 Library:OA\_TMS\_DB5\_67min\_V3.lib

SI:35 Formula:C<sub>21</sub>H<sub>52</sub>O<sub>6</sub>Si<sub>5</sub> CAS:3615-56-3 MolWeight:540 RetIndex:1895

CompName:Sorbose-5TMS; (3R,4S,5R)-1,3,4,5,6-pentahydroxyhexan-2-one

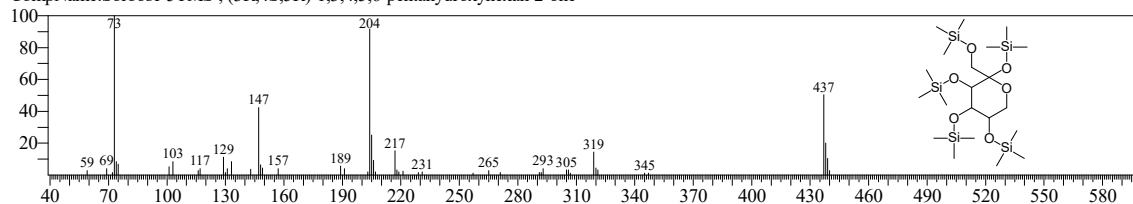

Hit#:3 Entry:555 Library:OA\_TMS\_DB5\_67min\_V3.lib

SI:35 Formula:C<sub>39</sub>H<sub>96</sub>O<sub>11</sub>Si<sub>9</sub> CAS:585-86-4 MolWeight:992 RetIndex:2845

CompName:Lactitol-9TMS; (2S,3R,4R,5R)-4-[(2S,3R,4S,5R,6R)-3,4,5-trihydroxy-6-(hydroxymethyl)oxan-2-yl]oxyhexane-1,2,3,5,6-pentol

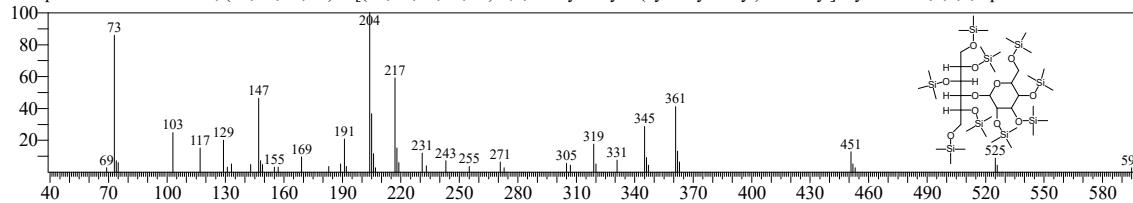

Hit#:4 Entry:320 Library:OA\_TMS\_DB5\_67min\_V3.lib

SI:34 Formula:C<sub>21</sub>H<sub>52</sub>O<sub>6</sub>Si<sub>5</sub> CAS:23140-52-5 MolWeight:540 RetIndex:1837

CompName:Psicose-5TMS(1); (3R,4R,5R)-1,3,4,5,6-pentahydroxyhexan-2-one

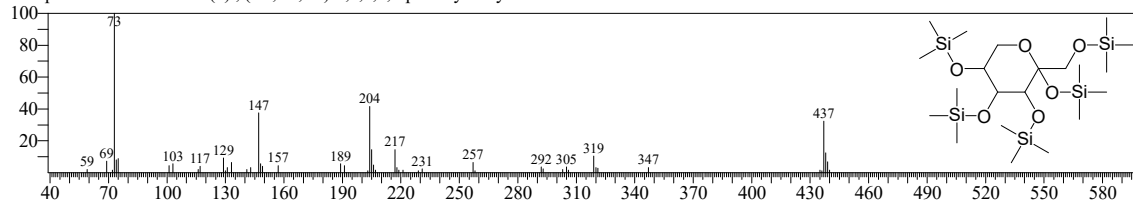

Hit#:5 Entry:380 Library:OA\_TMS\_DB5\_67min\_V3.lib

SI:34 Formula:C<sub>21</sub>H<sub>52</sub>O<sub>6</sub>Si<sub>5</sub> CAS:87-81-0 MolWeight:540 RetIndex:1914

CompName:Tagatose-5TMS(4); (3S,4S,5R)-1,3,4,5,6-pentahydroxyhexan-2-one

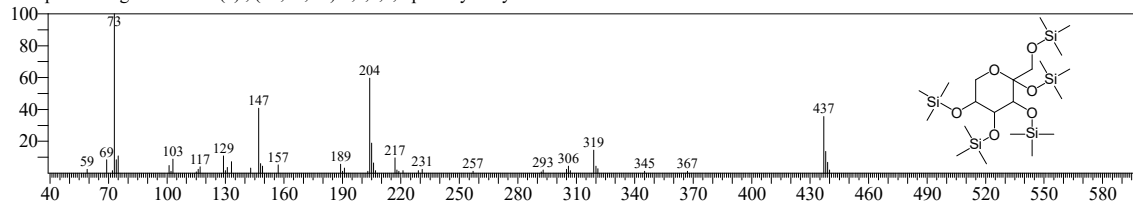

# TNAU

<< Target >>

Line#:35 R.Time:31.330(Scan#:5367) MassPeaks:273

RawMode:Averaged 31.325-31.335(5366-5368) BasePeak:281.05(1471)

BG Mode:Calc. from Peak Group 1 - Event 1 Q3 Scan

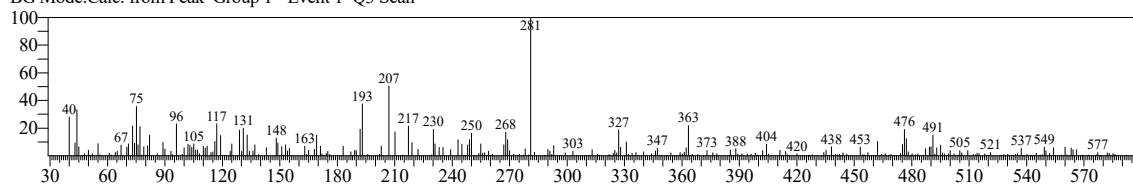

Hit#:1 Entry:535 Library:OA\_TMS\_DB5\_67min\_V3.lib

SI:40 Formula:C22H44N4O5Si4 CAS:58-63-9 MolWeight:556 RetIndex:2605

CompName:Inosine-4TMS ; 9-[(2R,3R,4S,5R)-3,4-dihydroxy-5-(hydroxymethyl)oxolan-2-yl]-3H-purin-6-one

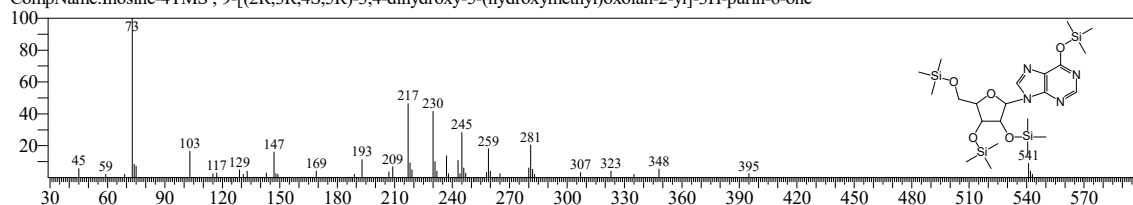

Hit#:2 Entry:538 Library:OA\_TMS\_DB5\_67min\_V3.lib

SI:37 Formula:C22H45NO4Si4 CAS:58-61-7 MolWeight:555 RetIndex:2670

CompName:Adenosine-4TMS ; (2R,3R,4S,5R)-2-(6-aminopurin-9-yl)-5-(hydroxymethyl)oxolane-3,4-diol

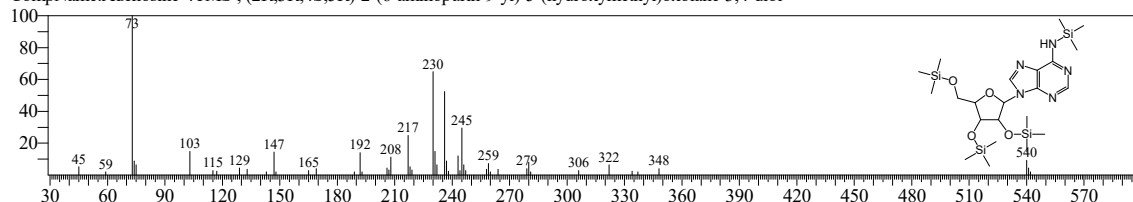

Hit#:3 Entry:328 Library:OA\_TMS\_DB5\_67min\_V3.lib

SI:35 Formula:C13H23NO2Si2 CAS:150-13-0 MolWeight:281 RetIndex:1845

CompName:4-Aminobenzoic acid-2TMS ; 4-aminobenzoic acid

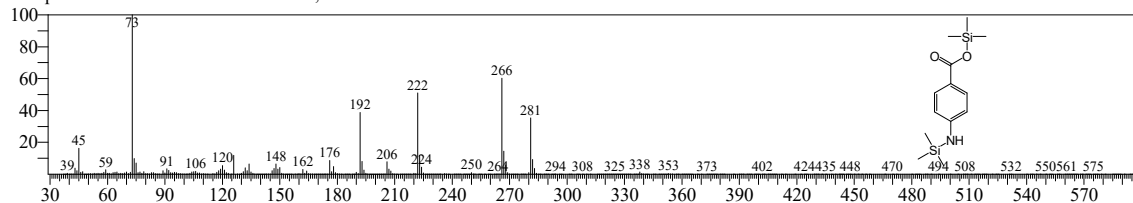

Hit#:4 Entry:362 Library:OA\_TMS\_DB5\_67min\_V3.lib

SI:34 Formula:C16H34O4Si2 CAS:111-20-6 MolWeight:346 RetIndex:1896

CompName:Sebacic acid-2TMS ; decanedioic acid

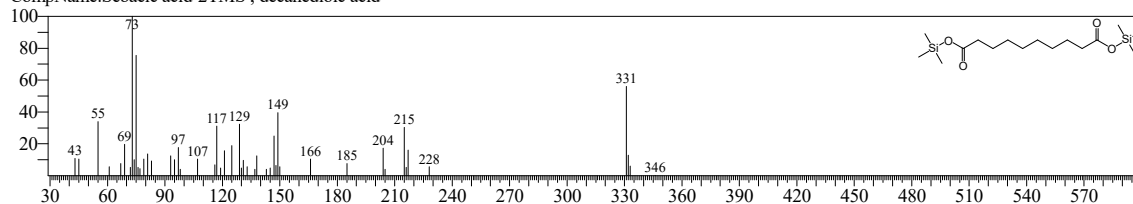

Hit#:5 Entry:336 Library:OA\_TMS\_DB5\_67min\_V3.lib

SI:34 Formula:C15H32O6Si3 CAS:32449-92-6 MolWeight:392 RetIndex:1854

CompName:Glucuronic acid lactone-3TMS(2) ; (2R)-2-[(2S,3R,4S)-3,4-dihydroxy-5-oxoxolan-2-yl]-2-hydroxyacetaldehyde

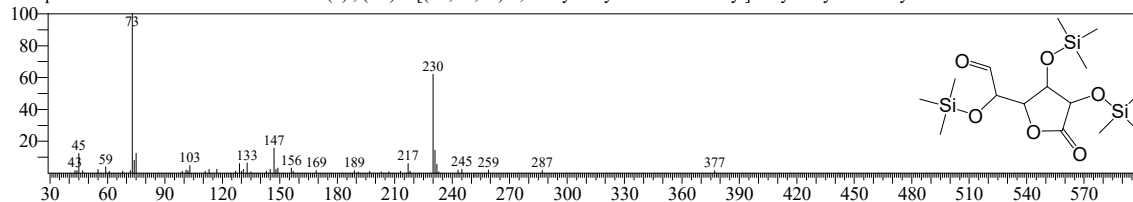

# TNAU

<< Target >>

Line#:36 R.Time:31.385(Scan#:5378) MassPeaks:299

RawMode:Averaged 31.380-31.390(5377-5379) BasePeak:191.05(738)

BG Mode:Calc. from Peak Group 1 - Event 1 Q3 Scan

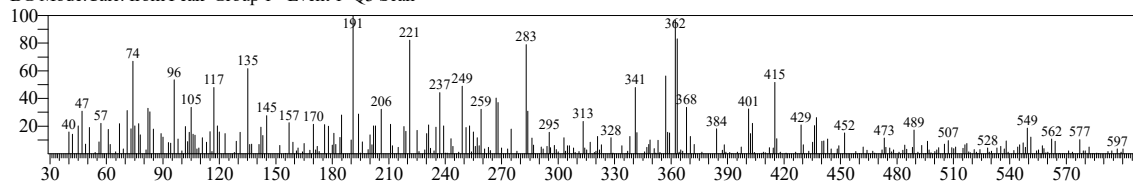

Hit#:1 Entry:330 Library:OA\_TMS\_DB5\_67min\_V3.lib

SI:23 Formula:C<sub>12</sub>H<sub>17</sub>NO<sub>3</sub>Si CAS:66407-11-2 MolWeight:251 RetIndex:1849

CompName:Hippuric acid-TMS ; 2-benzamidoacetic acid

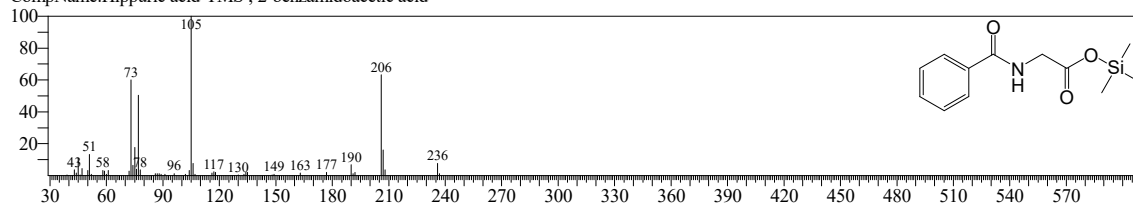

Hit#:2 Entry:491 Library:OA\_TMS\_DB5\_67min\_V3.lib

SI:22 Formula:C<sub>21</sub>H<sub>44</sub>O<sub>2</sub>Si CAS:57-11-4 MolWeight:356 RetIndex:2244

CompName:Stearic acid-TMS ; octadecanoic acid

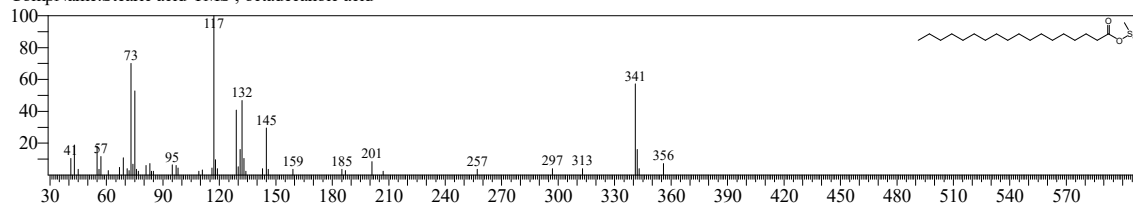

Hit#:3 Entry:211 Library:OA\_TMS\_DB5\_67min\_V3.lib

SI:22 Formula:C<sub>13</sub>H<sub>22</sub>O<sub>3</sub>Si<sub>2</sub> CAS:99-96-7 MolWeight:282 RetIndex:1636

CompName:4-Hydroxybenzoic acid-2TMS ; 4-hydroxybenzoic acid

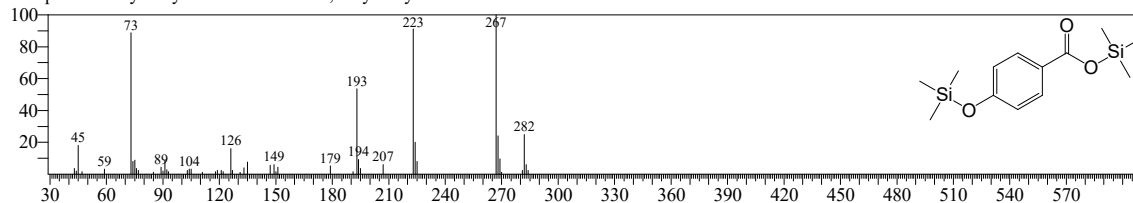

Hit#:4 Entry:446 Library:OA\_TMS\_DB5\_67min\_V3.lib

SI:22 Formula:C<sub>19</sub>H<sub>40</sub>O<sub>2</sub>Si CAS:57-10-3 MolWeight:328 RetIndex:2046

CompName:Palmitic acid-TMS ; hexadecanoic acid

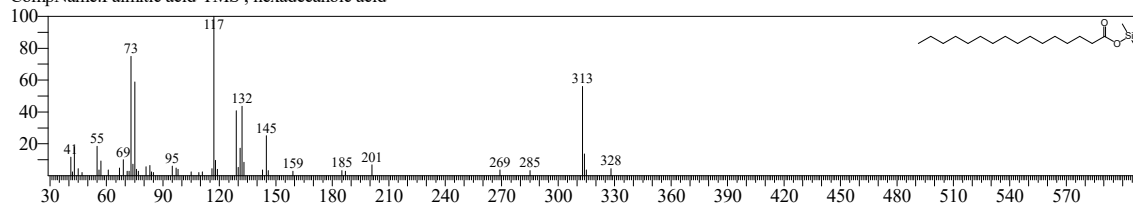

Hit#:5 Entry:442 Library:OA\_TMS\_DB5\_67min\_V3.lib

SI:21 Formula:C<sub>19</sub>H<sub>38</sub>O<sub>2</sub>Si CAS:373-49-9 MolWeight:326 RetIndex:2028

CompName:Palmitoleic acid-TMS ; hexadec-9-enoic acid

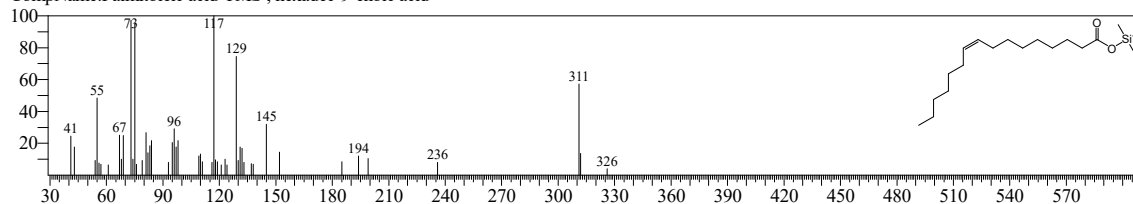

# TNAU

<< Target >>

Line#:37 R.Time:32.265(Scan#:5554) MassPeaks:330

RawMode:Averaged 32.260-32.270(5553-5555) BasePeak:207.05(2038)

BG Mode:Calc. from Peak Group 1 - Event 1 Q3 Scan

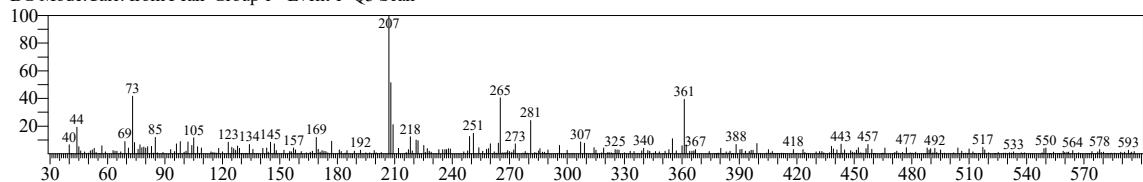

Hit#:1 Entry:528 Library:OA\_TMS\_DB5\_67min\_V3.lib

SI:41 Formula:C17H28Cl2N2O5Si2 CAS:56-75-7 MolWeight:466 RetIndex:2508

CompName:Chloramphenicol-2TMS ; 2,2-dichloro-N-[(1R,2R)-1,3-dihydroxy-1-(4-nitrophenyl)propan-2-yl]acetamide

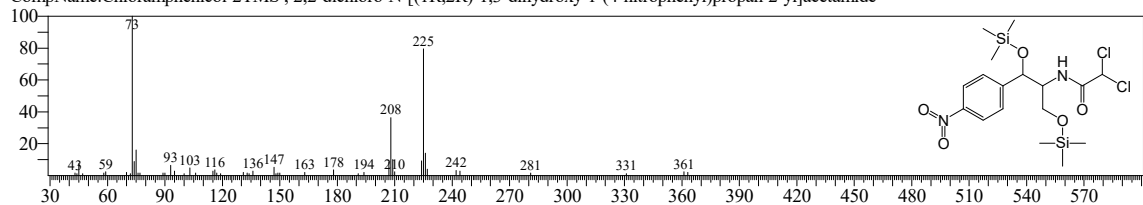

Hit#:2 Entry:310 Library:OA\_TMS\_DB5\_67min\_V3.lib

SI:39 Formula:C11H20N4OSi2 CAS:68-94-0 MolWeight:280 RetIndex:1822

CompName:Hypoxanthine-2TMS ; 3,7-dihydropurin-6-one

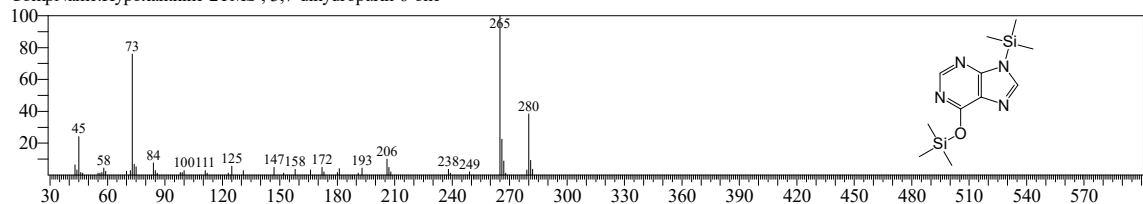

Hit#:3 Entry:461 Library:OA\_TMS\_DB5\_67min\_V3.lib

SI:38 Formula:C20H37NO4Si3 CAS:537-55-3 MolWeight:439 RetIndex:2119

CompName:N-Acetyltyrosine-3TMS ; (2S)-2-acetamido-3-(4-hydroxyphenyl)propanoic acid

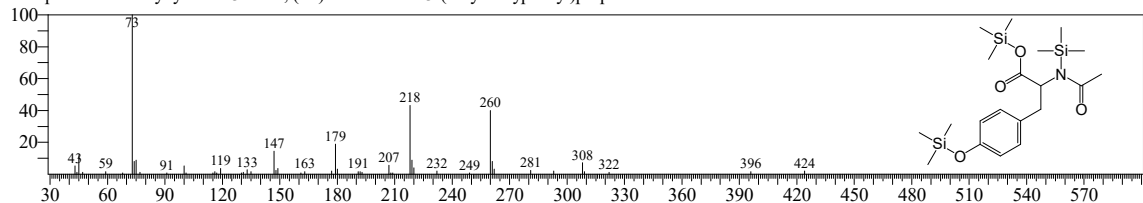

Hit#:4 Entry:343 Library:OA\_TMS\_DB5\_67min\_V3.lib

SI:37 Formula:C18H37NO3Si3 CAS:51-43-4 MolWeight:399 RetIndex:1868

CompName:Epinephrine-3TMS ; 4-[(1R)-1-hydroxy-2-(methylamino)ethyl]benzene-1,2-diol

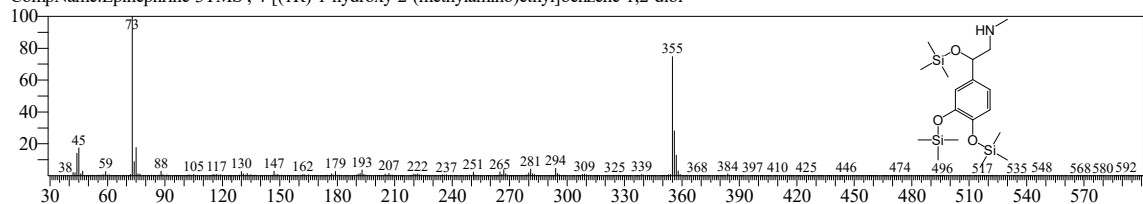

Hit#:5 Entry:3 Library:OA\_TMS\_DB5\_67min\_V3.lib

SI:36 Formula:C9H27BO3Si3 CAS:10043-35-3 MolWeight:278 RetIndex:992

CompName:Boric acid-3TMS ; boric acid

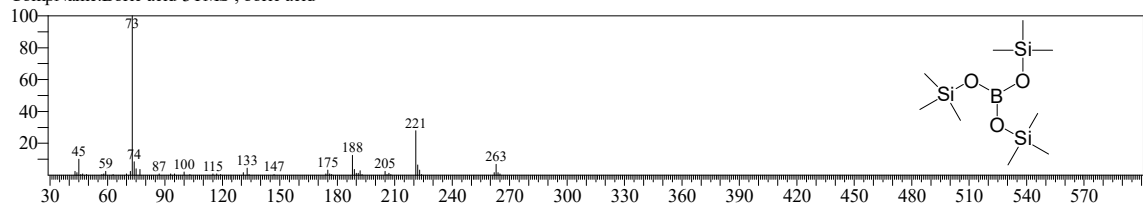

# TNAU

<< Target >>

Line#:38 R.Time:32.310(Scan#:5563) MassPeaks:325

RawMode:Averaged 32.305-32.315(5562-5564) BasePeak:73.05(797)

BG Mode:Calc. from Peak Group 1 - Event 1 Q3 Scan

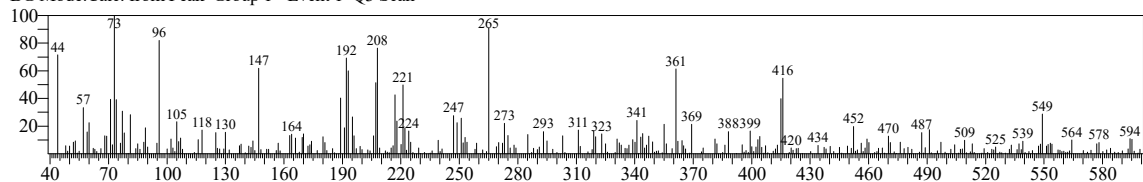

Hit#:1 Entry:3 Library:OA TMS\_DB5\_67min\_V3.lib

SI:34 Formula:C9H27BO3Si3 CAS:10043-35-3 MolWeight:278 RetIndex:992

CompName:Boric acid-3TMS ; boric acid

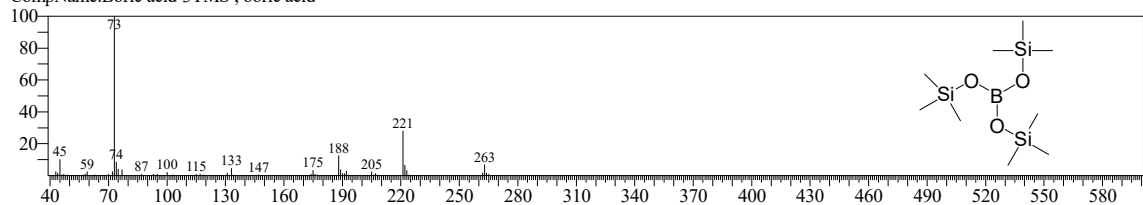

Hit#:2 Entry:210 Library:OA TMS\_DB5\_67min\_V3.lib

SI:34 Formula:C17H42O5Si4 CAS:10323-20-3 MolWeight:438 RetIndex:1634

CompName:Arabinose-4TMS(1) ; (2S,3R,4R)-2,3,4,5-tetrahydroxypentanal

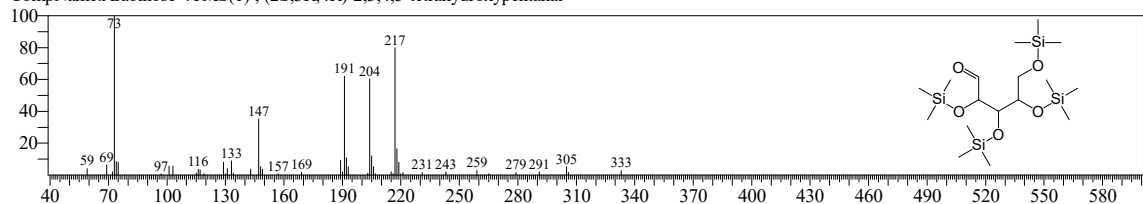

Hit#:3 Entry:250 Library:OA TMS\_DB5\_67min\_V3.lib

SI:34 Formula:C17H42O5Si4 CAS:50-69-1 MolWeight:438 RetIndex:1691

CompName:Ribose-4TMS(4) ; (3R,4S,5R)-5-(hydroxymethyl)oxolane-2,3,4-triol

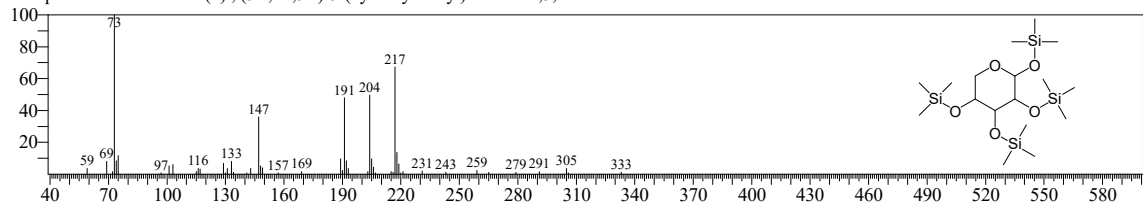

Hit#:4 Entry:148 Library:OA TMS\_DB5\_67min\_V3.lib

SI:34 Formula:C16H42O4Si4 CAS:2418-52-2 MolWeight:410 RetIndex:1512

CompName:Threitol-4TMS ; (2R,3R)-butane-1,2,3,4-tetrol

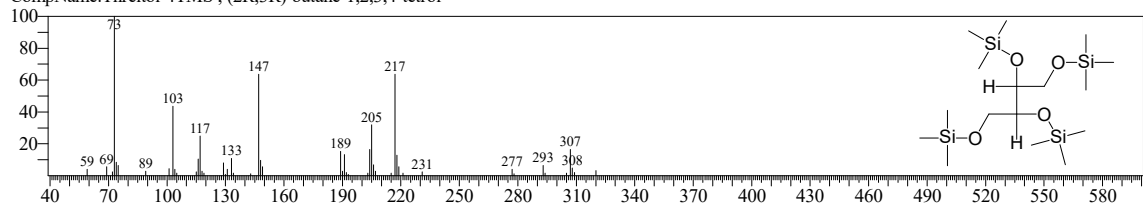

Hit#:5 Entry:295 Library:OA TMS\_DB5\_67min\_V3.lib

SI:33 Formula:C17H42O5Si4 CAS:58-86-6 MolWeight:438 RetIndex:1784

CompName:Xylose-4TMS(2) ; (2R,3S,4R)-2,3,4,5-tetrahydroxypentanal

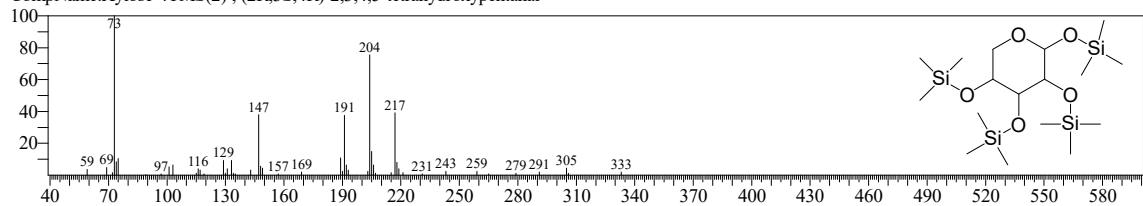



# TNAU

<< Target >>

Line#:39 R.Time:32.445(Scan#:5590) MassPeaks:289

RawMode:Averaged 32.440-32.450(5589-5591) BasePeak:283.05(801)

BG Mode:Calc. from Peak Group 1 - Event 1 Q3 Scan

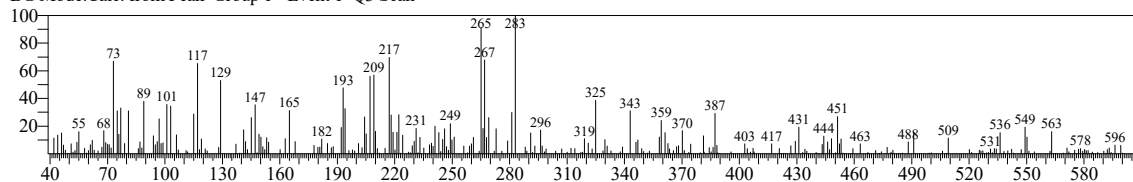

Hit#:1 Entry:250 Library:OA\_TMS\_DB5\_67min\_V3.lib

SI:38 Formula:C17H42O5Si4 CAS:50-69-1 MolWeight:438 RetIndex:1691

CompName:Ribose-4TMS(4) ; (3R,4S,5R)-5-(hydroxymethyl)oxolane-2,3,4-triol

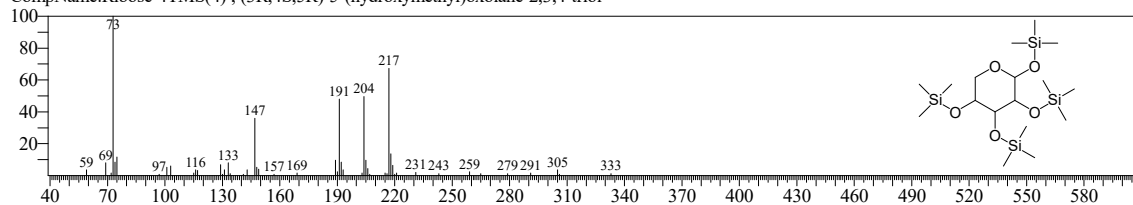

Hit#:2 Entry:210 Library:OA\_TMS\_DB5\_67min\_V3.lib

SI:37 Formula:C17H42O5Si4 CAS:10323-20-3 MolWeight:438 RetIndex:1634

CompName:Arabinose-4TMS(1) ; (2S,3R,4R)-2,3,4,5-tetrahydroxypentanal

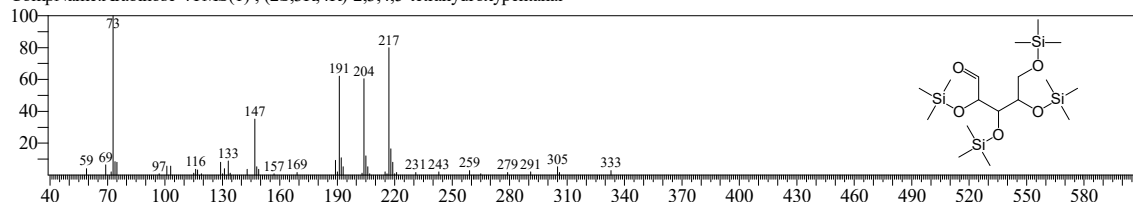

Hit#:3 Entry:238 Library:OA\_TMS\_DB5\_67min\_V3.lib

SI:37 Formula:C17H42O5Si4 CAS:1114-34-7 MolWeight:438 RetIndex:1675

CompName:Lyxose-4TMS(2) ; (2S,3S,4R)-2,3,4,5-tetrahydroxypentanal

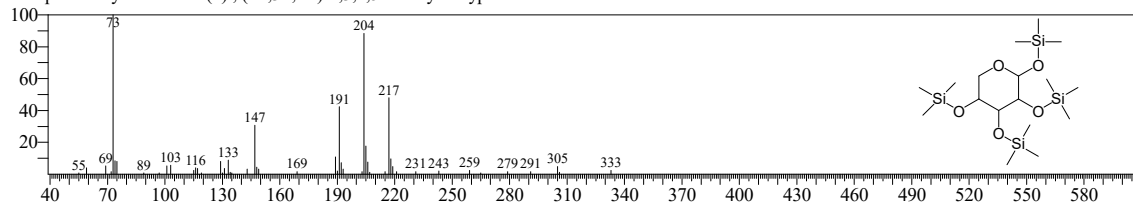

Hit#:4 Entry:535 Library:OA\_TMS\_DB5\_67min\_V3.lib

SI:37 Formula:C22H44N4O5Si4 CAS:58-63-9 MolWeight:556 RetIndex:2605

CompName:Inosine-4TMS ; 9-[(2R,3R,4S,5R)-3,4-dihydroxy-5-(hydroxymethyl)oxolan-2-yl]-3H-purin-6-one

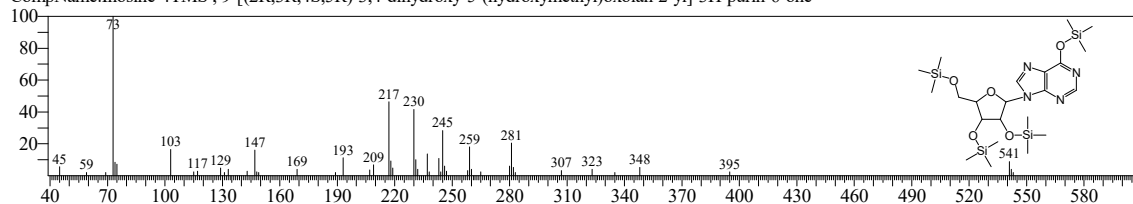

Hit#:5 Entry:295 Library:OA\_TMS\_DB5\_67min\_V3.lib

SI:37 Formula:C17H42O5Si4 CAS:58-86-6 MolWeight:438 RetIndex:1784

CompName:Xylose-4TMS(2) ; (2R,3S,4R)-2,3,4,5-tetrahydroxypentanal

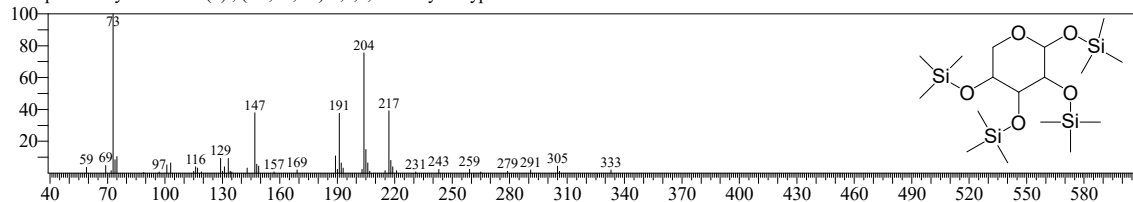

# TNAU

<< Target >>

Line#:40 R.Time:32.530(Scan#:5607) MassPeaks:301

RawMode:Averaged 32.525-32.535(5606-5608) BasePeak:207.05(1306)

BG Mode:Calc. from Peak Group 1 - Event 1 Q3 Scan

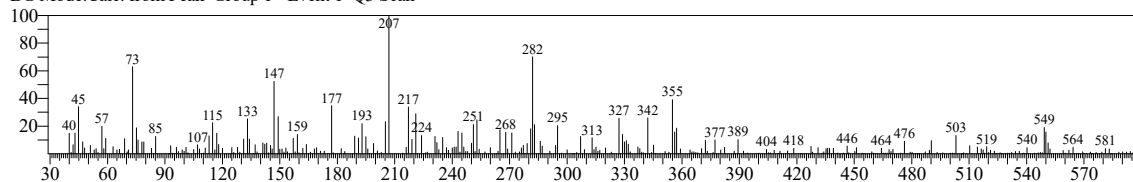

Hit#:1 Entry:343 Library:OA\_TMS\_DB5\_67min\_V3.lib

SI:46 Formula:C18H37NO3Si3 CAS:51-43-4 MolWeight:399 RetIndex:1868

CompName:Epinephrine-3TMS ; 4-[(1R)-1-hydroxy-2-(methylamino)ethyl]benzene-1,2-diol

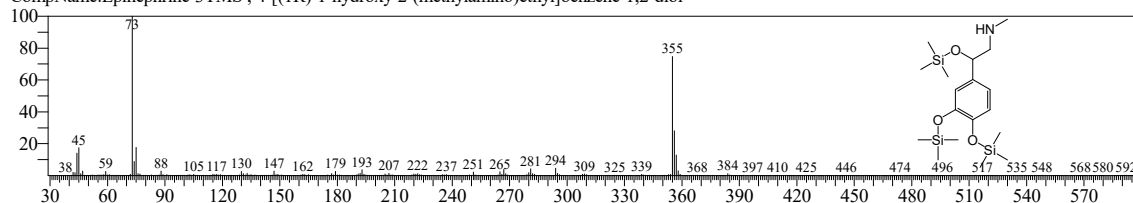

Hit#:2 Entry:402 Library:OA\_TMS\_DB5\_67min\_V3.lib

SI:45 Formula:C20H42O4Si4 CAS:775-01-9 MolWeight:458 RetIndex:1942

CompName:3,4-Dihydroxymandelic acid-4TMS ; 2-(3,4-dihydroxyphenyl)-2-hydroxyacetic acid

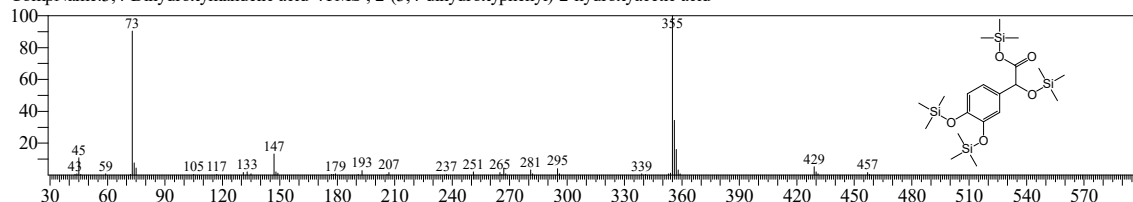

Hit#:3 Entry:535 Library:OA\_TMS\_DB5\_67min\_V3.lib

SI:41 Formula:C22H44N4O5Si4 CAS:58-63-9 MolWeight:556 RetIndex:2605

CompName:Inosine-4TMS ; 9-[(2R,3R,4S,5R)-3,4-dihydroxy-5-(hydroxymethyl)oxolan-2-yl]-3H-purin-6-one

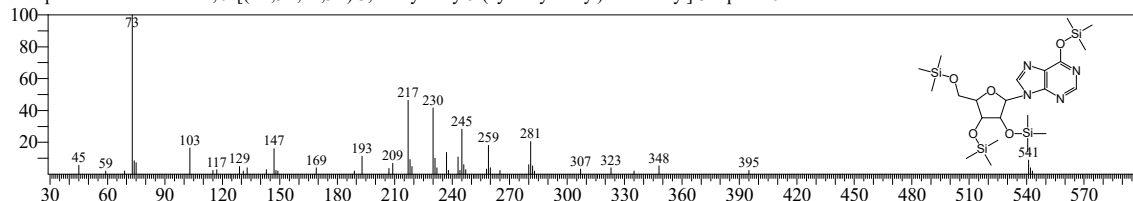

Hit#:4 Entry:148 Library:OA\_TMS\_DB5\_67min\_V3.lib

SI:41 Formula:C16H42O4Si4 CAS:2418-52-2 MolWeight:410 RetIndex:1512

CompName:Threitol-4TMS ; (2R,3R)-butane-1,2,3,4-tetrol

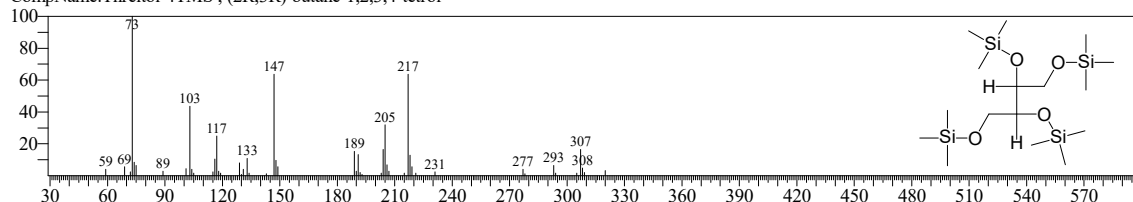

Hit#:5 Entry:306 Library:OA\_TMS\_DB5\_67min\_V3.lib

SI:40 Formula:C18H44O5Si4 CAS:154-17-6 MolWeight:452 RetIndex:1816

CompName:2-Deoxy-glucose-4TMS(2) ; (2S,4S,5S,6S)-6-(hydroxymethyl)oxane-2,4,5-triol

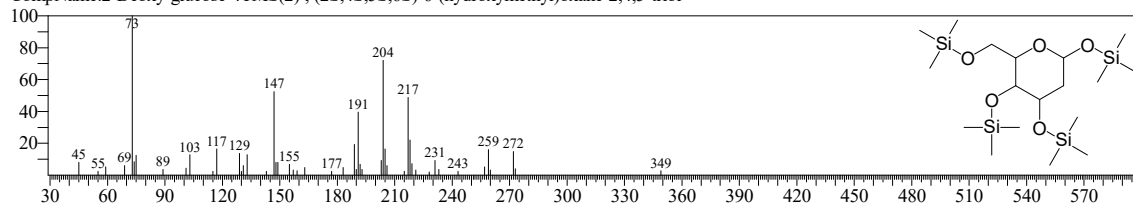

# TNAU

<< Target >>

Line#:41 R.Time:32.855(Scan#:5672) MassPeaks:298

RawMode:Averaged 32.850-32.860(5671-5673) BasePeak:355.10(544)

BG Mode:Calc. from Peak Group 1 - Event 1 Q3 Scan

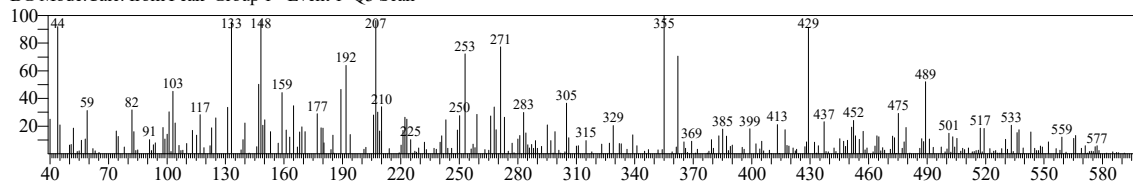

Hit#:1 Entry:402 Library:OA\_TMS\_DB5\_67min\_V3.lib

SI:28 Formula:C20H42O4Si4 CAS:775-01-9 MolWeight:458 RetIndex:1942

CompName:3,4-Dihydroxymandelic acid-4TMS ; 2-(3,4-dihydroxyphenyl)-2-hydroxyacetic acid

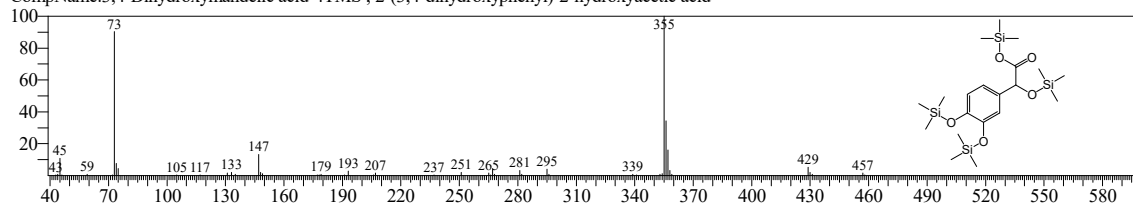

Hit#:2 Entry:13 Library:OA\_TMS\_DB5\_67min\_V3.lib

SI:25 Formula:C8H20O3Si2 CAS:79-14-1 MolWeight:220 RetIndex:1074

CompName:Glycolic acid-2TMS ; 2-hydroxyacetic acid

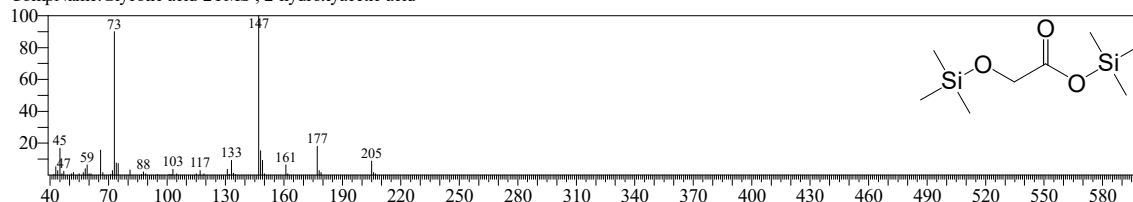

Hit#:3 Entry:10 Library:OA\_TMS\_DB5\_67min\_V3.lib

SI:25 Formula:C10H24O3Si2 CAS:594-61-6 MolWeight:248 RetIndex:1067

CompName:2-Hydroxyisobutyric acid-2TMS ; 2-hydroxy-2-methylpropanoic acid

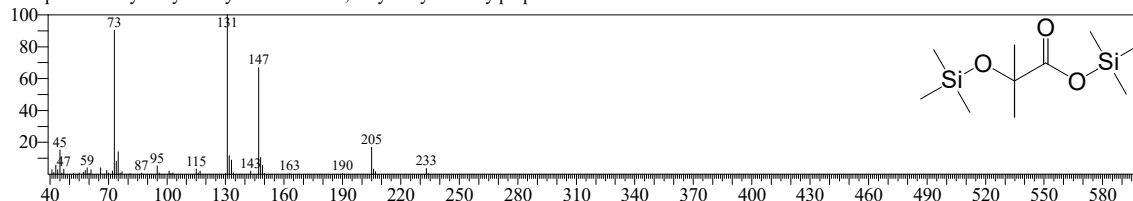

Hit#:4 Entry:313 Library:OA\_TMS\_DB5\_67min\_V3.lib

SI:24 Formula: CAS:0-00-0 MolWeight:1831 RetIndex:1831

CompName:Ornithine-d7-4TMS ;

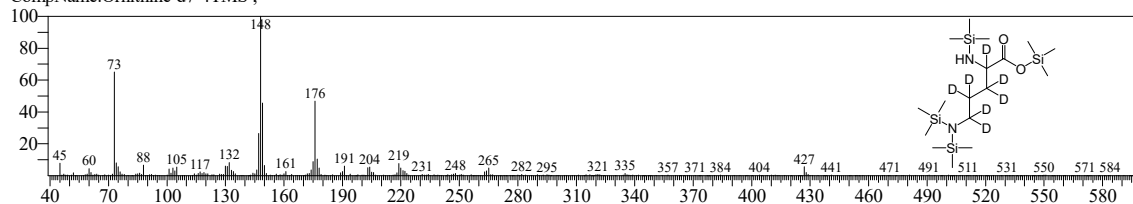

Hit#:5 Entry:35 Library:OA\_TMS\_DB5\_67min\_V3.lib

SI:24 Formula:C10H24O3Si2 CAS:300-85-6 MolWeight:248 RetIndex:1161

CompName:3-Hydroxybutyric acid-2TMS ; 3-hydroxybutanoic acid

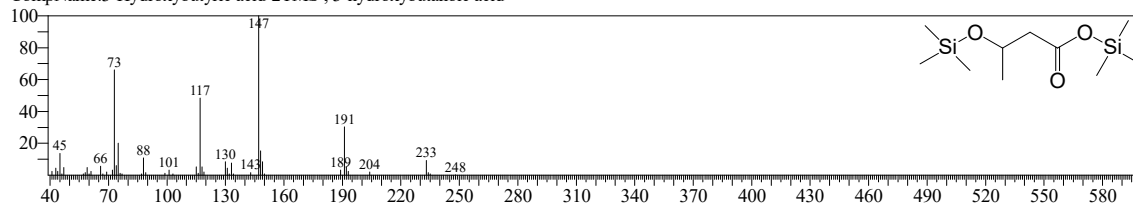

# TNAU

<< Target >>

Line#:42 R.Time:32.945(Scan#:5690) MassPeaks:283

RawMode:Averaged 32.940-32.950(5689-5691) BasePeak:207.05(1860)

BG Mode:Calc. from Peak Group 1 - Event 1 Q3 Scan

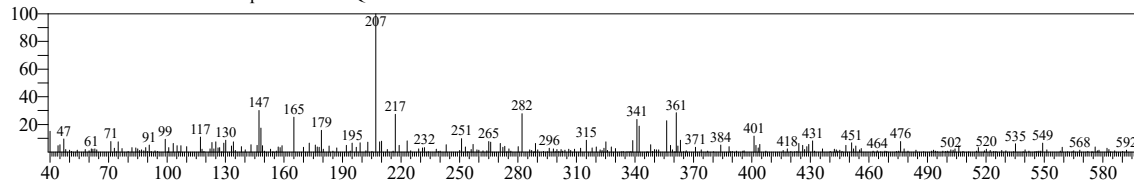

Hit#:1 Entry:559 Library:OA TMS DB5 67min V3.lib

SI:32 Formula:C39H96O11Si9 CAS:585-88-6 MolWeight:992 RetIndex:2923

CompName:Maltitol-9TMS ; (2S,3R,4R,5R)-4-[(2R,3R,4S,5S,6R)-3,4,5-trihydroxy-6-(hydroxymethyl)oxan-2-yl]oxyhexane-1,2,3,5,6-pentol

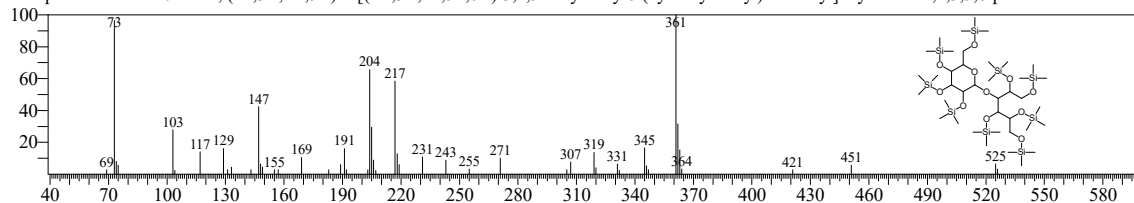

Hit#:2 Entry:541 Library:OA TMS DB5 67min V3.lib

SI:30 Formula:C36H86O11Si8 CAS:57-50-1 MolWeight:918 RetIndex:2705

CompName:Sucrose-8TMS ; (2R,3R,4S,5S,6R)-2-[(2S,3S,4S,5R)-3,4-dihydroxy-2,5-bis(hydroxymethyl)oxolan-2-yl]oxy-6-(hydroxymethyl)oxane-3

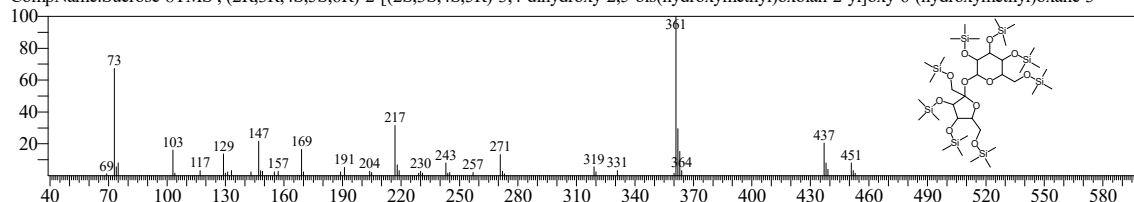

Hit#:3 Entry:552 Library:OA TMS DB5 67min V3.lib

SI:28 Formula:C36H86O11Si8 CAS:99-20-7 MolWeight:918 RetIndex:2812

CompName:Trehalose-8TMS ; (2R,3S,4S,5R,6R)-2-(hydroxymethyl)-6-[(2R,3R,4S,5S,6R)-3,4,5-trihydroxy-6-(hydroxymethyl)oxan-2-yl]oxyoxane-

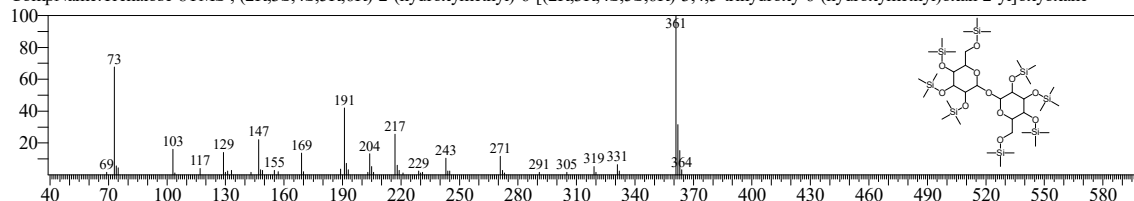

Hit#:4 Entry:560 Library:OA TMS DB5 67min V3.lib

SI:28 Formula:C37H89NO11Si8 CAS:499-40-1 MolWeight:947 RetIndex:2947

CompName:Isomaltose-meto-8TMS(1) ; (3R,4S,5S,6R)-6-[[[(2S,3R,4S,5S,6R)-3,4,5-trihydroxy-6-(hydroxymethyl)oxan-2-yl]oxymethyl]oxane-2,3,

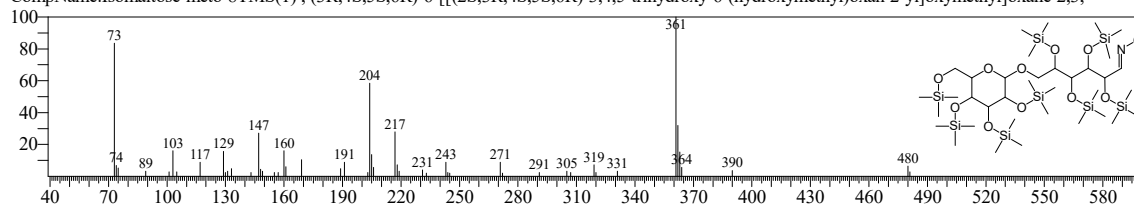

Hit#:5 Entry:491 Library:OA TMS DB5 67min V3.lib

SI:27 Formula:C21H44O2Si CAS:57-11-4 MolWeight:356 RetIndex:2244

CompName:Stearic acid-TMS ; octadecanoic acid

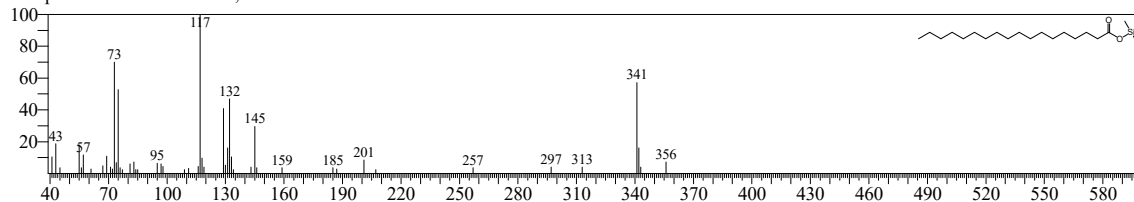

Supplement: Supplementary file 30 [file supplementary]
