# Supplementary material for: Comparative Metabolomics Profiling Reveals Key Metabolites and Associated Pathways Regulating Tuber Dormancy in White Yam (<em>Dioscorea rotundata</em>)
Source: Preprints.org preprint supplement (doi:10.20944/preprints202303.0378.v1), 2023-03-21

# TNAU

## Sample Information

Analyzed by : Admin  
 Analyzed : 05-Aug-22 12:42:45 AM  
 Sample Type : Unknown  
 Level # : 1  
 Sample Name : C101-3  
 Sample ID : C101-3  
 IS Amount : [1]=1  
 Sample Amount : 1  
 Dilution Factor : 1  
 Vial # : 13  
 Injection Volume : 1.00  
 Data File : D:\GCMS-8040NX\Aug 2022\Users\04.08.2022\Data files\04082022-013.qgd  
 Org Data File : D:\GCMS-8040NX\Aug 2022\Users\04.08.2022\Data files\04082022-013.qgd  
 Method File : D:\GCMS-8040NX\Aug 2022\Users\04.08.2022\Method file\27072022\_methodfile.qgm  
 Org Method File : D:\GCMS-8040NX\Aug 2022\Users\04.08.2022\Method file\27072022\_methodfile.qgm  
 Report File :  
 Tuning File : D:\GCMS-8040NX\Aug 2022\Tuning Data\TUNING 04082022.qgt  
 [Comment]  
 Jerry samples  
 Modified by : Admin  
 Modified : 05-Aug-22 4:29:58 PM

Chromatogram C101-3 D:\GCMS-8040NX\Aug 2022\Users\04.08.2022\Data files\04082022-013.qgd

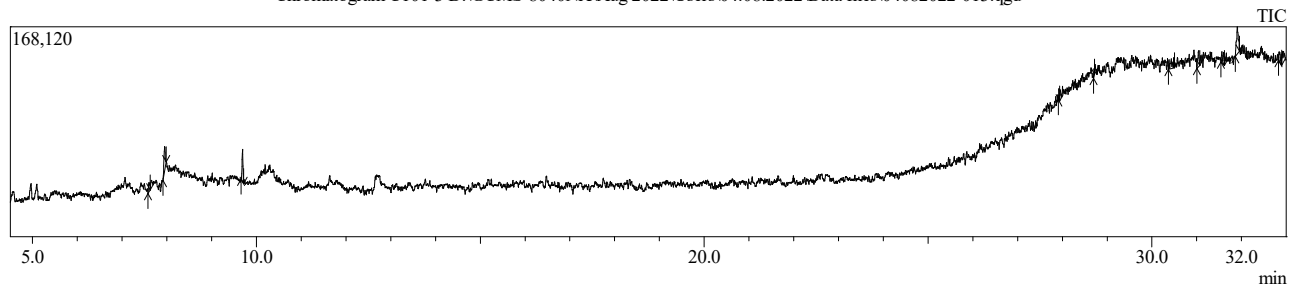

Peak Report TIC

| Peak# | R.Time | Area   | Area%  | Height | Height% | A/H  | Similarity | Name                       |
|-------|--------|--------|--------|--------|---------|------|------------|----------------------------|
| 1     | 7.590  | 15409  | 5.61   | 6584   | 5.24    | 2.34 | 41         | Batyl alcohol-2TMS         |
| 2     | 7.950  | 41151  | 14.99  | 19315  | 15.36   | 2.13 | 83         | Undecane                   |
| 3     | 9.690  | 37196  | 13.55  | 25742  | 20.47   | 1.44 | 88         | Undecane                   |
| 4     | 27.923 | 7419   | 2.70   | 9615   | 7.65    | 0.77 | 41         | Epinephrine-3TMS           |
| 5     | 28.705 | 5338   | 1.95   | 5605   | 4.46    | 0.95 | 40         | Chloramphenicol-2TMS       |
| 6     | 30.489 | 34607  | 12.61  | 8525   | 6.78    | 4.06 | 30         | Stearic acid-TMS           |
| 7     | 31.041 | 25962  | 9.46   | 13017  | 10.35   | 1.99 | 41         | Batyl alcohol-2TMS         |
| 8     | 31.562 | 23725  | 8.64   | 8898   | 7.08    | 2.67 | 34         | 3-Hydroxybenzoic acid-2TMS |
| 9     | 31.907 | 63116  | 23.00  | 21713  | 17.27   | 2.91 | 37         | Inosine-4TMS               |
| 10    | 32.835 | 20518  | 7.48   | 6728   | 5.35    | 3.05 | 28         | Tyrosine-3TMS              |
|       |        | 274441 | 100.00 | 125742 | 100.00  |      |            |                            |

Library

# TNAU

<< Target >>

Line#:1 R.Time:7.590(Scan#:619) MassPeaks:279  
RawMode:Averaged 7.585-7.595(618-620) BasePeak:281.00(959)  
BG Mode:Calc. from Peak Group 1 - Event 1 Q3 Scan

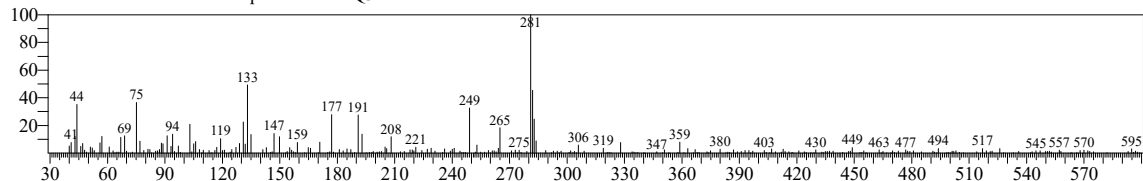

Hit#:1 Entry:539 Library:OA\_TMS\_DB5\_67min\_V3.lib  
SI:41 Formula:C27H60O3Si2 CAS:544-62-7 MolWeight:488 RetIndex:2684  
CompName:Batyl alcohol-2TMS ; 3-octadecoxypropane-1,2-diol

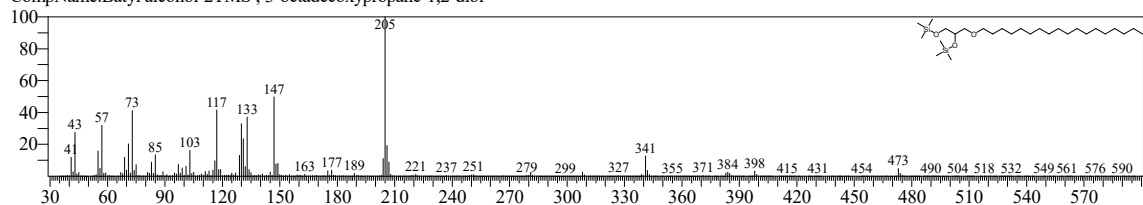

Hit#:2 Entry:35 Library:OA\_TMS\_DB5\_67min\_V3.lib  
SI:35 Formula:C10H24O3Si2 CAS:300-85-6 MolWeight:248 RetIndex:1161  
CompName:3-Hydroxybutyric acid-2TMS ; 3-hydroxybutanoic acid

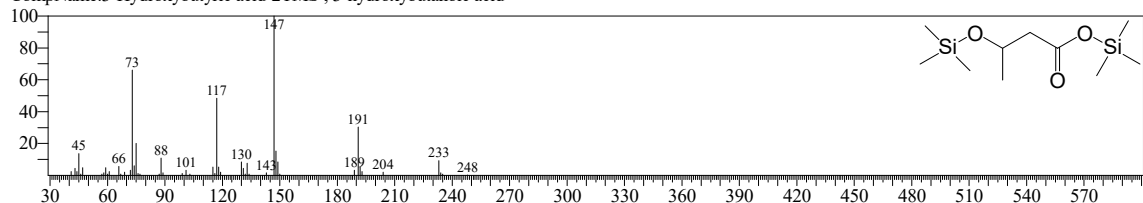

Hit#:3 Entry:331 Library:OA\_TMS\_DB5\_67min\_V3.lib  
SI:33 Formula:C17H36O2Si CAS:544-63-8 MolWeight:300 RetIndex:1850  
CompName:Myristic acid-TMS ; tetradecanoic acid

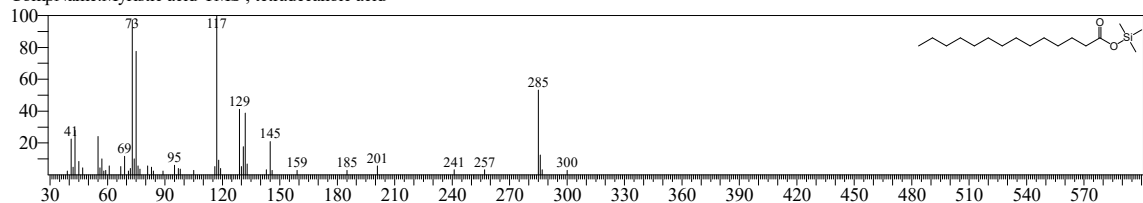

Hit#:4 Entry:70 Library:OA\_TMS\_DB5\_67min\_V3.lib  
SI:33 Formula:C11H24O2Si CAS:124-07-2 MolWeight:216 RetIndex:1263  
CompName:Octanoic acid-TMS ; octanoic acid

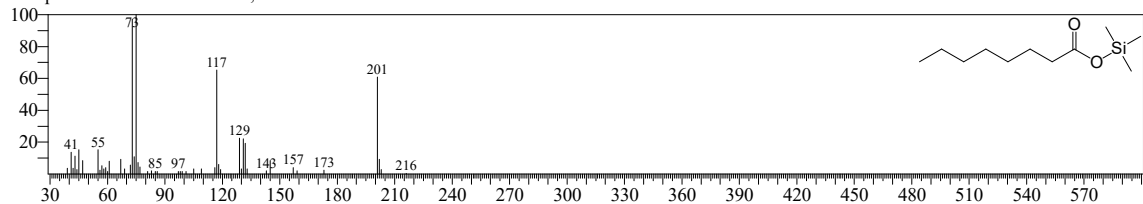

Hit#:5 Entry:446 Library:OA\_TMS\_DB5\_67min\_V3.lib  
SI:32 Formula:C19H40O2Si CAS:57-10-3 MolWeight:328 RetIndex:2046  
CompName:Palmitic acid-TMS ; hexadecanoic acid

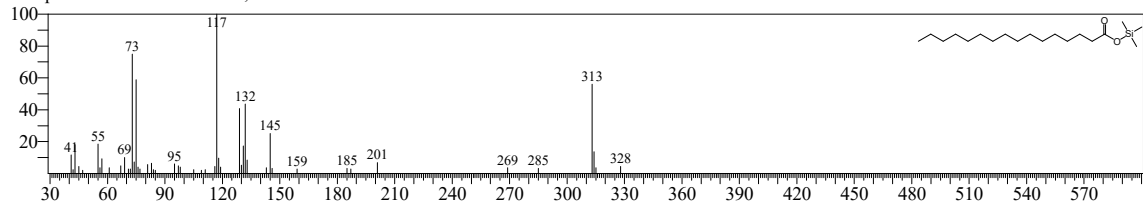

# TNAU

<< Target >>

Line# 2 R.Time: 7.950 (Scan#: 691) MassPeaks: 320

RawMode: Averaged 7.945-7.955 (690-692) BasePeak: 57.10 (3539)

BG Mode: Calc. from Peak Group 1 - Event 1 Q3 Scan

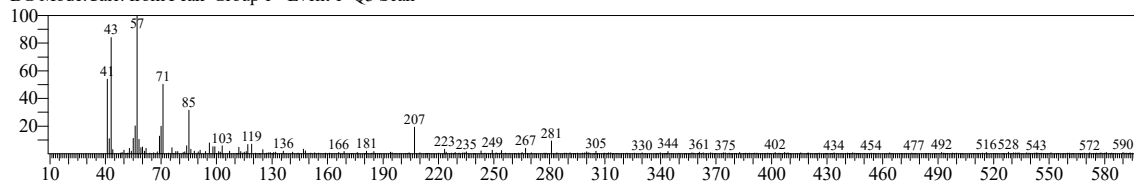

Hit#: 1 Entry: 12897 Library: NIST20R.lib

SI: 83 Formula: C<sub>11</sub>H<sub>24</sub> CAS: 1120-21-4 MolWeight: 156 RetIndex: 1100

CompName: Undecane \$\$ n-Undecane \$\$ Hendecane \$\$ n-C<sub>11</sub>H<sub>24</sub> \$\$ UN 2330

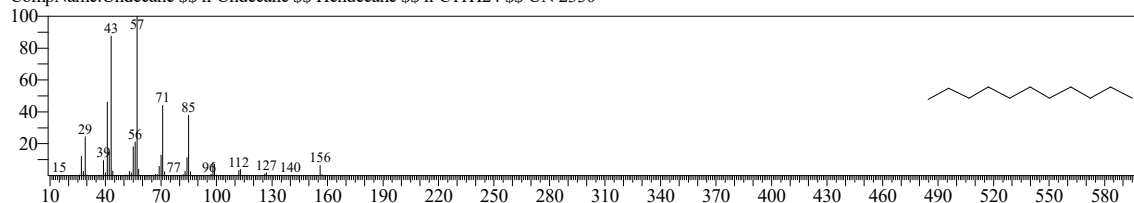

Hit#: 2 Entry: 19411 Library: NIST20R.lib

SI: 83 Formula: C<sub>13</sub>H<sub>28</sub> CAS: 629-50-5 MolWeight: 184 RetIndex: 1300

CompName: Tridecane \$\$ n-Tridecane \$\$ Tridecane, n-

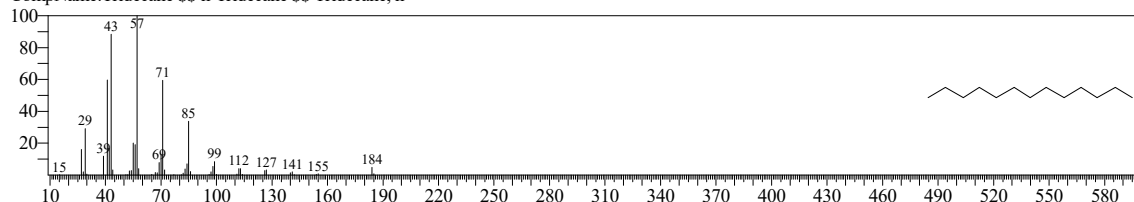

Hit#: 3 Entry: 22498 Library: NIST20R.lib

SI: 83 Formula: C<sub>14</sub>H<sub>30</sub> CAS: 629-59-4 MolWeight: 198 RetIndex: 1400

CompName: Tetradecane \$\$ n-Tetradecane

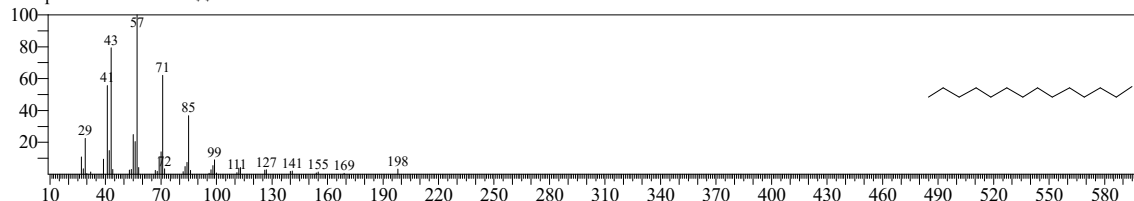

Hit#: 4 Entry: 13604 Library: NIST20M1.lib

SI: 82 Formula: C<sub>10</sub>H<sub>22</sub> CAS: 124-18-5 MolWeight: 142 RetIndex: 1000

CompName: Decane \$\$ n-Decane \$\$ n-C<sub>10</sub>H<sub>22</sub> \$\$ UN 2247

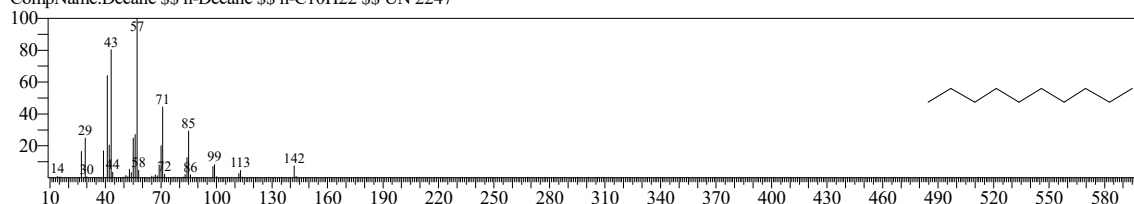

Hit#: 5 Entry: 16191 Library: NIST20R.lib

SI: 82 Formula: C<sub>12</sub>H<sub>26</sub> CAS: 112-40-3 MolWeight: 170 RetIndex: 1200

CompName: Dodecane \$\$ n-Dodecane \$\$ Adakane 12 \$\$ Ba 51-090453 \$\$ CH<sub>3</sub>(CH<sub>2</sub>)<sub>10</sub>CH<sub>3</sub> \$\$ Bihexyl \$\$ Dihexyl \$\$ Duodecane \$\$ NSC 8714

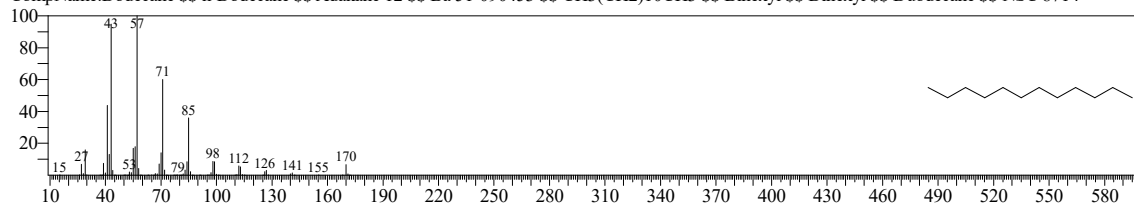

# TNAU

<< Target >>

Line#3 R.Time:9.690(Scan#:1039) MassPeaks:294

RawMode:Averaged 9.685-9.695(1038-1040) BasePeak:57.10(4873)

BG Mode:Calc. from Peak Group 1 - Event 1 Q3 Scan

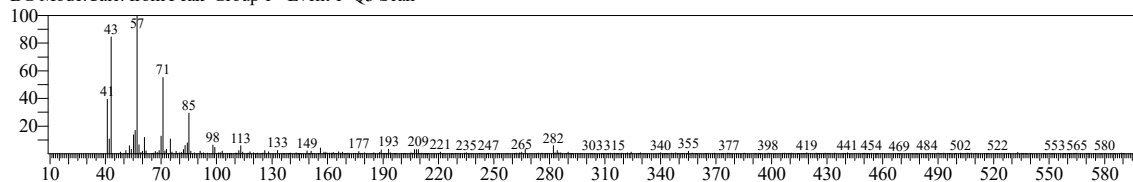

Hit#:1 Entry:21042 Library:NIST20M1.lib

SI:88 Formula:C11H24 CAS:1120-21-4 MolWeight:156 RetIndex:1100

CompName:Undecane \$\$ n-Undecane \$\$ Hendecane \$\$ n-C11H24 \$\$ UN 2330

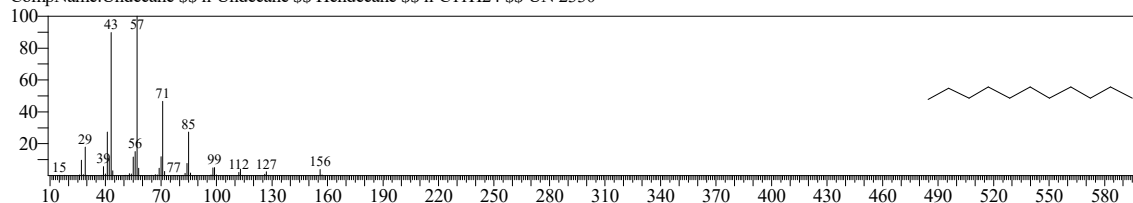

Hit#:2 Entry:40226 Library:NIST20M1.lib

SI:87 Formula:C13H28 CAS:629-50-5 MolWeight:184 RetIndex:1300

CompName:Tridecane \$\$ n-Tridecane \$\$ Tridecane, n-

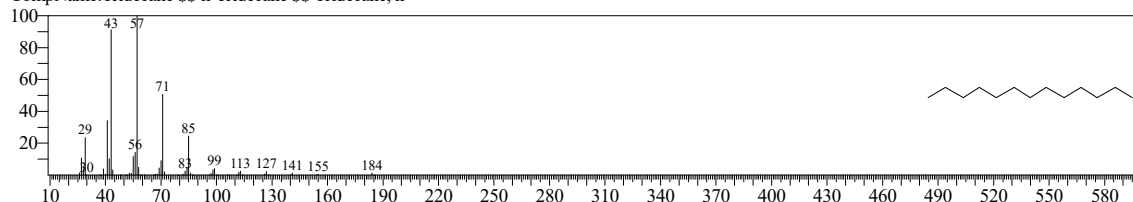

Hit#:3 Entry:16191 Library:NIST20R.lib

SI:87 Formula:C12H26 CAS:112-40-3 MolWeight:170 RetIndex:1200

CompName:Dodecane \$\$ n-Dodecane \$\$ Adakane 12 \$\$ Ba 51-090453 \$\$ CH3(CH2)10CH3 \$\$ Bihexyl \$\$ Dihexyl \$\$ Duodecane \$\$ NSC 8714

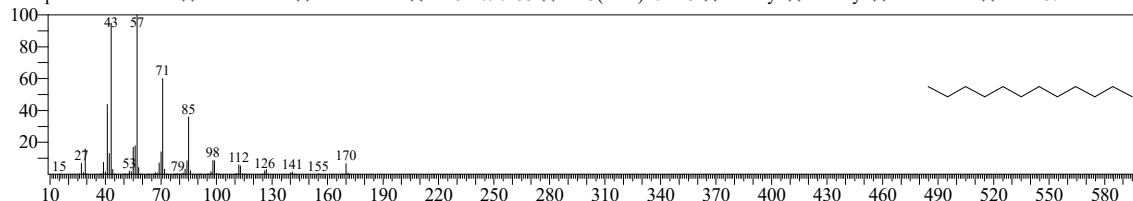

Hit#:4 Entry:29663 Library:NIST20R.lib

SI:86 Formula:C17H36 CAS:629-78-7 MolWeight:240 RetIndex:1700

CompName:Heptadecane \$\$ n-Heptadecane \$\$ Normal-heptadecane

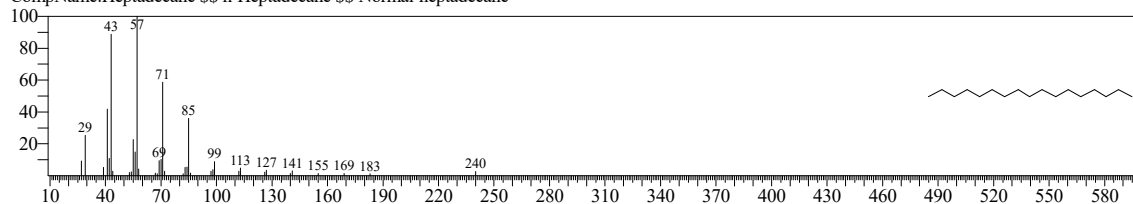

Hit#:5 Entry:27736 Library:NIST20R.lib

SI:86 Formula:C16H34 CAS:544-76-3 MolWeight:226 RetIndex:1600

CompName:Hexadecane \$\$ n-Cetane \$\$ n-Hexadecane \$\$ Cetane

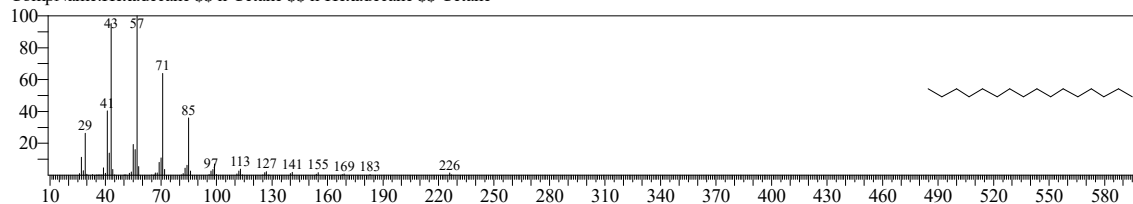

# TNAU

<< Target >>

Line#:4 R.Time:27.925(Scan#:4686) MassPeaks:274

RawMode:Averaged 27.920-27.930(4685-4687) BasePeak:281.05(1162)

BG Mode:Calc. from Peak Group 1 - Event 1 Q3 Scan

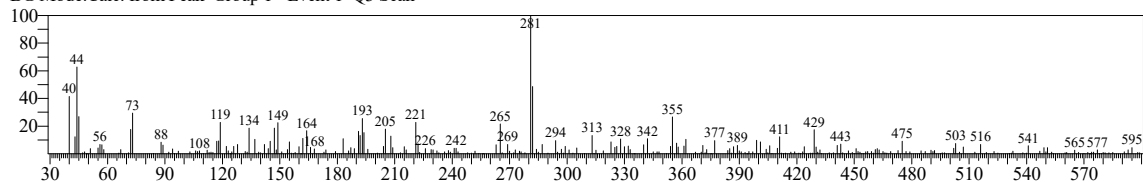

Hit#:1 Entry:343 Library:OA TMS DB5\_67min\_V3.lib

SI:41 Formula:C18H37NO3Si3 CAS:51-43-4 MolWeight:399 RetIndex:1868

CompName:Epinephrine-2TMS ; 4-[(1R)-1-hydroxy-2-(methylamino)ethyl]benzene-1,2-diol

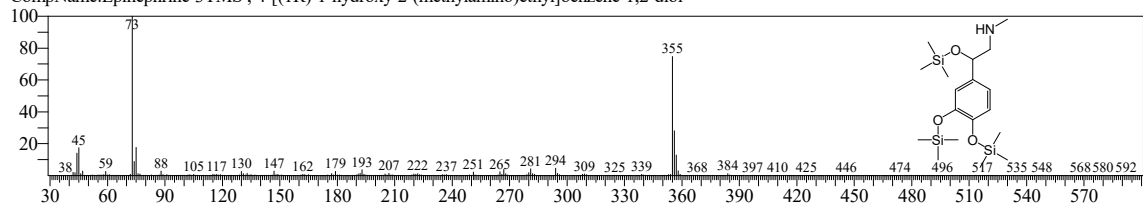

Hit#:2 Entry:328 Library:OA TMS DB5\_67min\_V3.lib

SI:39 Formula:C13H23NO2Si2 CAS:150-13-0 MolWeight:281 RetIndex:1845

CompName:4-Aminobenzoic acid-2TMS ; 4-aminobenzoic acid

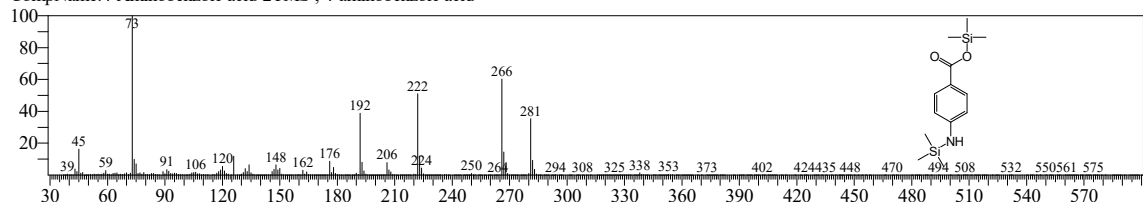

Hit#:3 Entry:315 Library:OA TMS DB5\_67min\_V3.lib

SI:39 Formula:C16H30O4Si3 CAS:99-50-3 MolWeight:370 RetIndex:1833

CompName:Protocatechuic acid-3TMS ; 3,4-dihydroxybenzoic acid

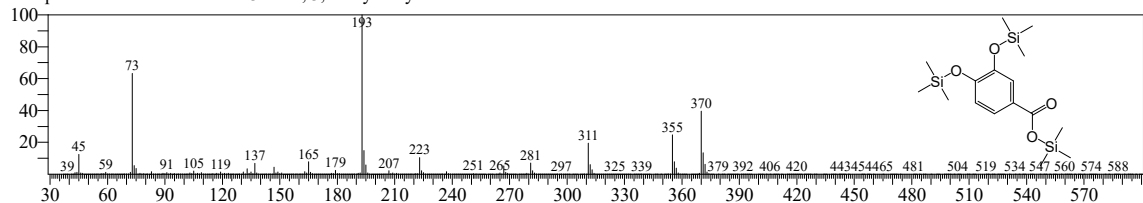

Hit#:4 Entry:402 Library:OA TMS DB5\_67min\_V3.lib

SI:38 Formula:C20H42O4Si4 CAS:775-01-9 MolWeight:458 RetIndex:1942

CompName:3,4-Dihydroxymandelic acid-4TMS ; 2-(3,4-dihydroxyphenyl)-2-hydroxyacetic acid

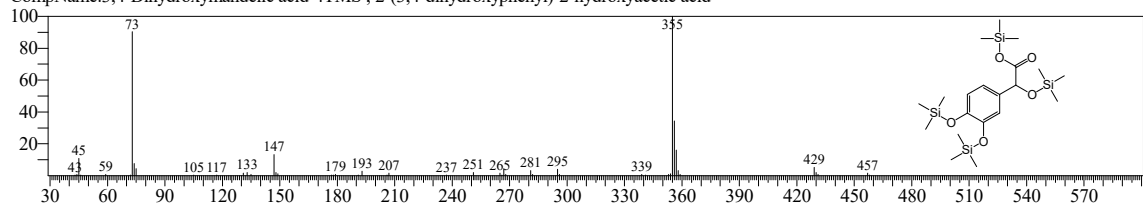

Hit#:5 Entry:290 Library:OA TMS DB5\_67min\_V3.lib

SI:36 Formula:C13H23NO3Si2 CAS:548-93-6 MolWeight:297 RetIndex:1773

CompName:3-Hydroxyanthranilic acid-2TMS ; 2-amino-3-hydroxybenzoic acid

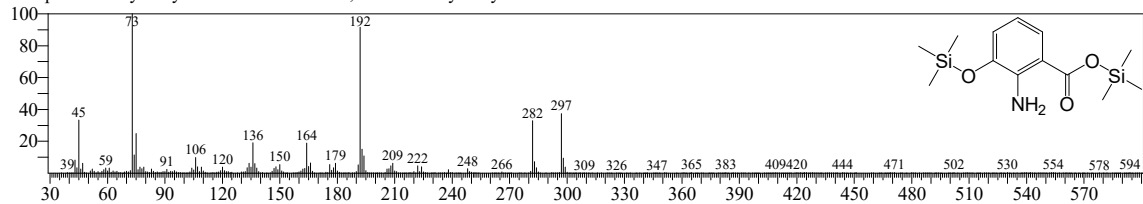

# TNAU

<< Target >>

Line#:5 R.Time:28.705(Scan#:4842) MassPeaks:307

RawMode:Averaged 28.700-28.710(4841-4843) BasePeak:207.00(721)

BG Mode:Calc. from Peak Group 1 - Event 1 Q3 Scan

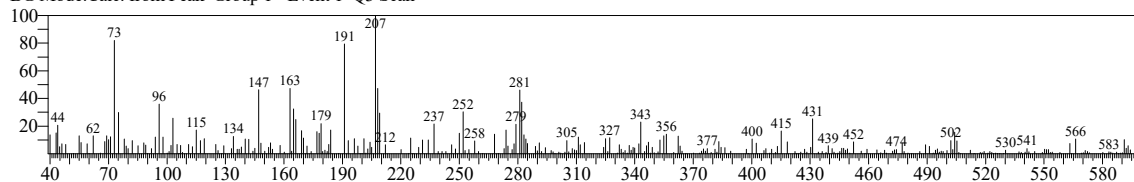

Hit#:1 Entry:528 Library:OA\_TMS\_DB5\_67min\_V3.lib

SI:40 Formula:C17H28Cl2N2O5Si2 CAS:56-75-7 MolWeight:466 RetIndex:2508

CompName:Chloramphenicol-2TMS ; 2,2-dichloro-N-[(1R,2R)-1,3-dihydroxy-1-(4-nitrophenyl)propan-2-yl]acetamide

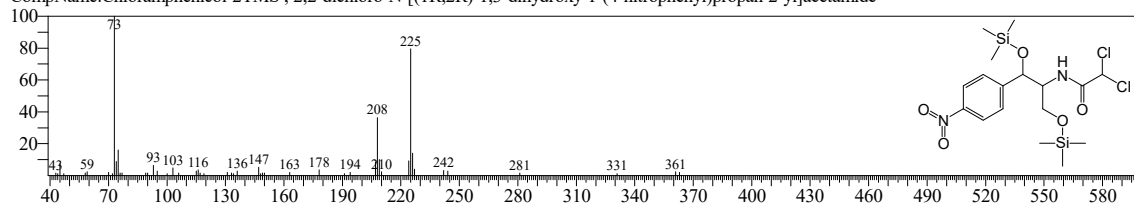

Hit#:2 Entry:220 Library:OA\_TMS\_DB5\_67min\_V3.lib

SI:38 Formula:C14H24O3Si2 CAS:156-38-7 MolWeight:296 RetIndex:1647

CompName:4-Hydroxyphenylacetic acid-2TMS ; 2-(4-hydroxyphenyl)acetic acid

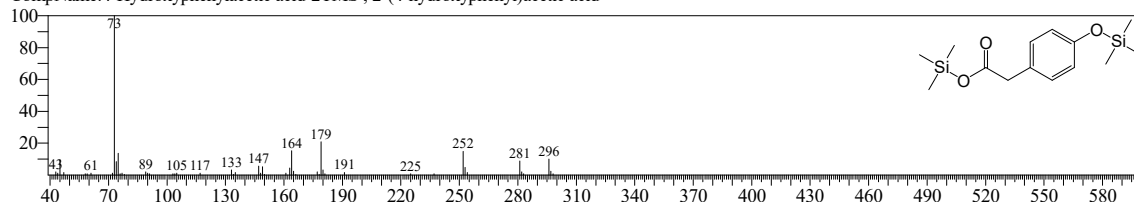

Hit#:3 Entry:200 Library:OA\_TMS\_DB5\_67min\_V3.lib

SI:38 Formula:C14H24O3Si2 CAS:621-37-4 MolWeight:296 RetIndex:1617

CompName:3-Hydroxyphenylacetic acid-2TMS ; 2-(3-hydroxyphenyl)acetic acid

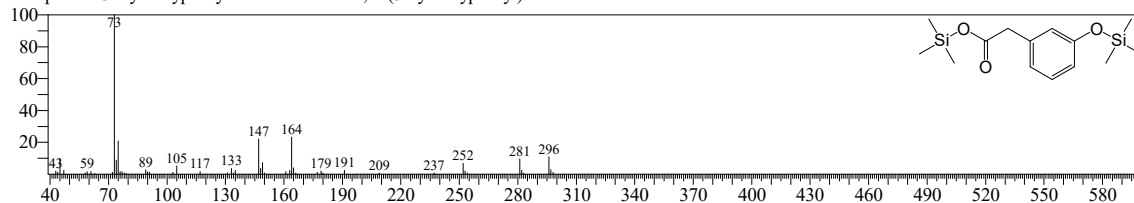

Hit#:4 Entry:294 Library:OA\_TMS\_DB5\_67min\_V3.lib

SI:37 Formula:C15H26O4Si2 CAS:306-08-1 MolWeight:326 RetIndex:1782

CompName:Homovanillic acid-2TMS ; 2-(4-hydroxy-3-methoxyphenyl)acetic acid

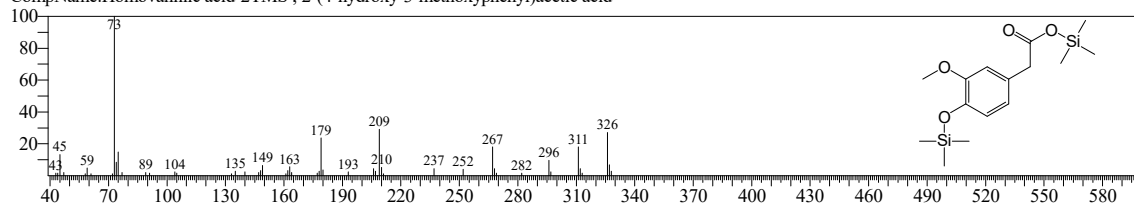

Hit#:5 Entry:382 Library:OA\_TMS\_DB5\_67min\_V3.lib

SI:36 Formula:C18H34O4Si3 CAS:6482-98-0 MolWeight:398 RetIndex:1918

CompName:4-Hydroxyphenyllactic acid-3TMS ; 2-hydroxy-3-(4-hydroxyphenyl)propanoate

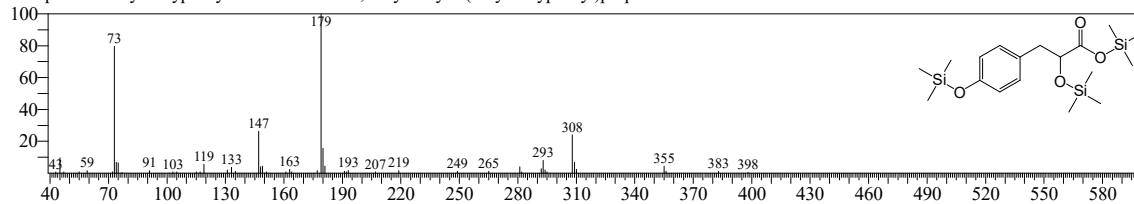

# TNAU

<< Target >>

Line#:6 R.Time:30.490(Scan#:5199) MassPeaks:283

RawMode:Averaged 30.485-30.495(5198-5200) BasePeak:207.05(1579)

BG Mode:Calc. from Peak Group 1 - Event 1 Q3 Scan

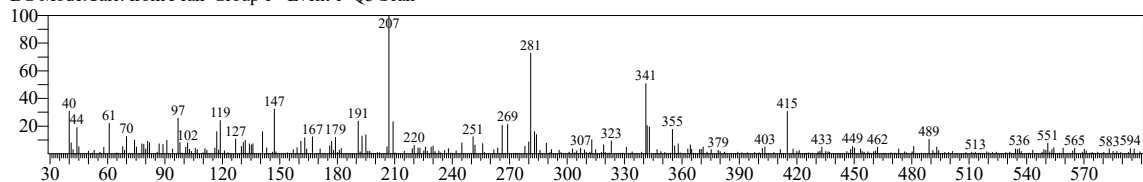

Hit#:1 Entry:491 Library:OA\_TMS\_DB5\_67min\_V3.lib

SI:30 Formula:C21H44O2Si CAS:57-11-4 MolWeight:356 RetIndex:2244

CompName:Stearic acid-TMS ; octadecanoic acid

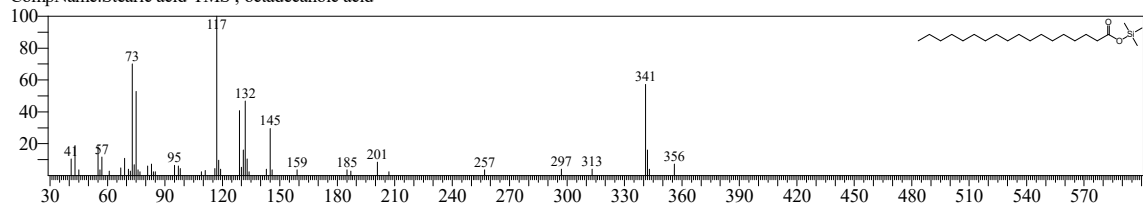

Hit#:2 Entry:382 Library:OA\_TMS\_DB5\_67min\_V3.lib

SI:27 Formula:C18H34O4Si3 CAS:6482-98-0 MolWeight:398 RetIndex:1918

CompName:4-Hydroxyphenyllactic acid-3TMS ; 2-hydroxy-3-(4-hydroxyphenyl)propanoate

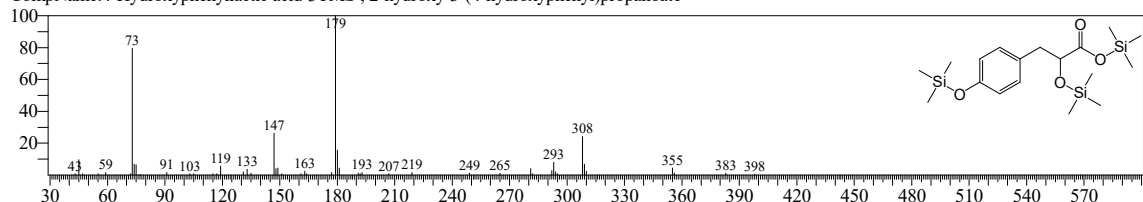

Hit#:3 Entry:402 Library:OA\_TMS\_DB5\_67min\_V3.lib

SI:27 Formula:C20H42O4Si4 CAS:775-01-9 MolWeight:458 RetIndex:1942

CompName:3,4-Dihydroxymandelic acid-4TMS ; 2-(3,4-dihydroxyphenyl)-2-hydroxyacetic acid

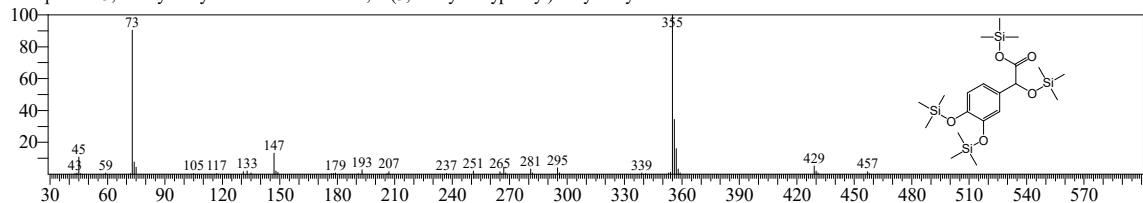

Hit#:4 Entry:315 Library:OA\_TMS\_DB5\_67min\_V3.lib

SI:25 Formula:C16H30O4Si3 CAS:99-50-3 MolWeight:370 RetIndex:1833

CompName:Protocatechuic acid-3TMS ; 3,4-dihydroxybenzoic acid

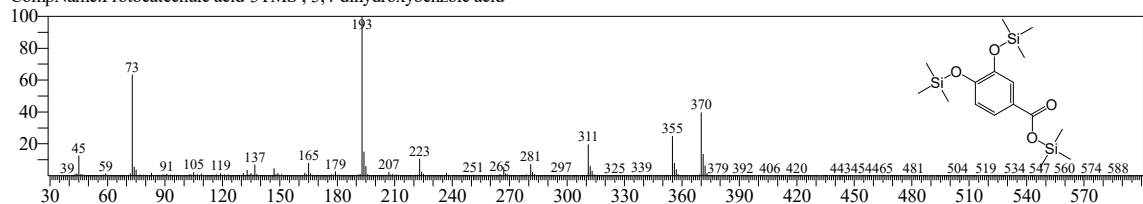

Hit#:5 Entry:150 Library:OA\_TMS\_DB5\_67min\_V3.lib

SI:24 Formula:C15H26O3Si2 CAS:515-30-0 MolWeight:310 RetIndex:1517

CompName:2-Phenyllactic acid-2TMS ; 2-hydroxy-3-phenylpropanoic acid

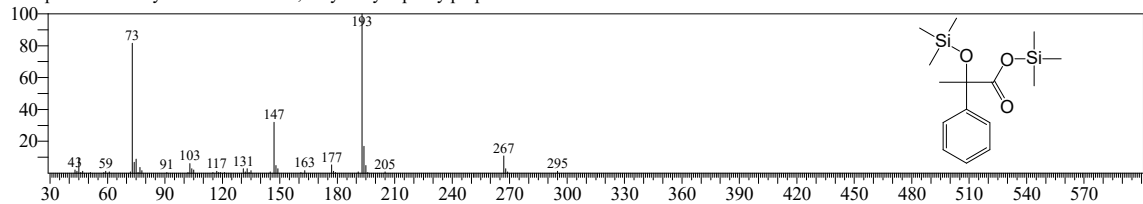

# TNAU

<< Target >>

Line#:7 R.Time:31.040(Scan#:5309) MassPeaks:293

RawMode:Averaged 31.035-31.045(5308-5310) BasePeak:207.05(2620)

BG Mode:Calc. from Peak Group 1 - Event 1 Q3 Scan

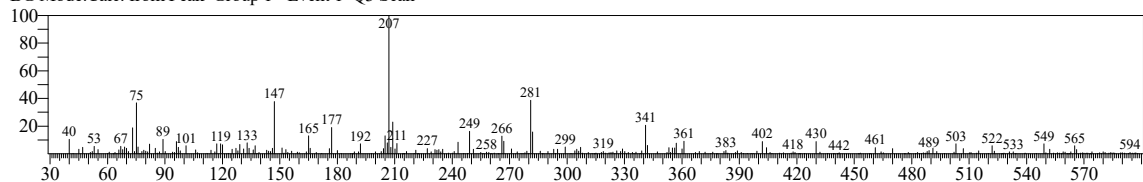

Hit#:1 Entry:539 Library:OA\_TMS\_DB5\_67min\_V3.lib

SI:41 Formula:C27H60O3Si2 CAS:544-62-7 MolWeight:488 RetIndex:2684

CompName:Butyl alcohol-2TMS ; 3-octadecoxypropane-1,2-diol

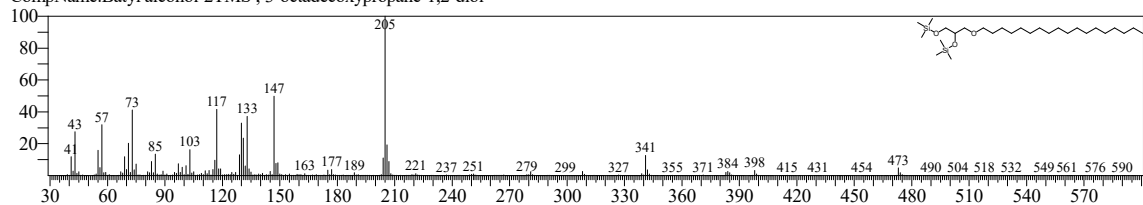

Hit#:2 Entry:328 Library:OA\_TMS\_DB5\_67min\_V3.lib

SI:41 Formula:C13H23NO2Si2 CAS:150-13-0 MolWeight:281 RetIndex:1845

CompName:4-Aminobenzoic acid-2TMS ; 4-aminobenzoic acid

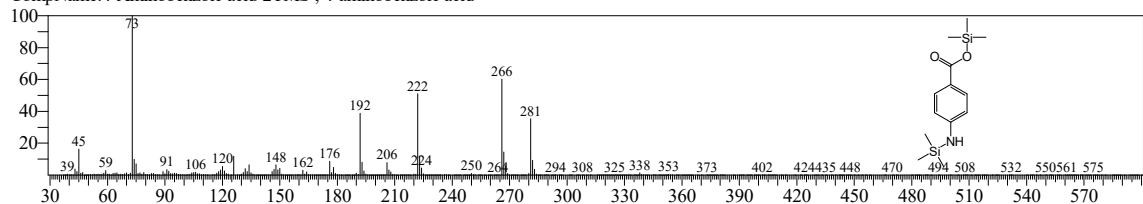

Hit#:3 Entry:77 Library:OA\_TMS\_DB5\_67min\_V3.lib

SI:40 Formula:C12H32O3Si3 CAS:56-81-5 MolWeight:308 RetIndex:1279

CompName:Glycerol-3TMS ; propane-1,2,3-triol

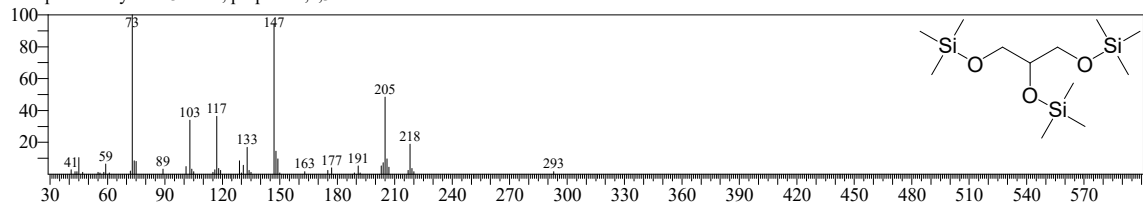

Hit#:4 Entry:389 Library:OA\_TMS\_DB5\_67min\_V3.lib

SI:38 Formula:C17H44NO7PSi4 CAS:585-18-2 MolWeight:517 RetIndex:1928

CompName:Erythrose 4-phosphate-meto-4TMS(1) ; [(2R,3R)-2,3-dihydroxy-4-oxobutyl] dihydrogen phosphate

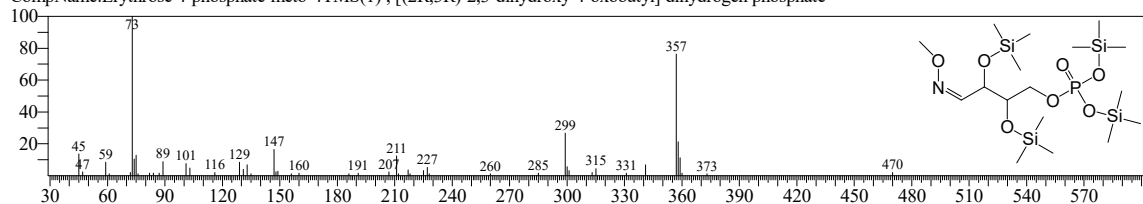

Hit#:5 Entry:13 Library:OA\_TMS\_DB5\_67min\_V3.lib

SI:38 Formula:C8H20O3Si2 CAS:79-14-1 MolWeight:220 RetIndex:1074

CompName:Glycolic acid-2TMS ; 2-hydroxyacetic acid

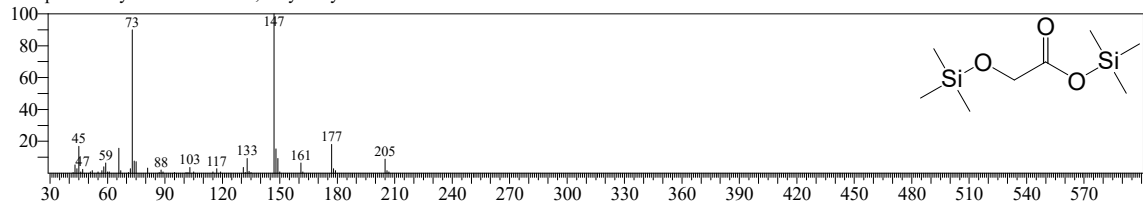



# TNAU

<< Target >>

Line#:8 R.Time:31.560(Scan#:5413) MassPeaks:282

RawMode:Averaged 31.555-31.565(5412-5414) BasePeak:265.05(1196)

BG Mode:Calc. from Peak Group 1 - Event 1 Q3 Scan

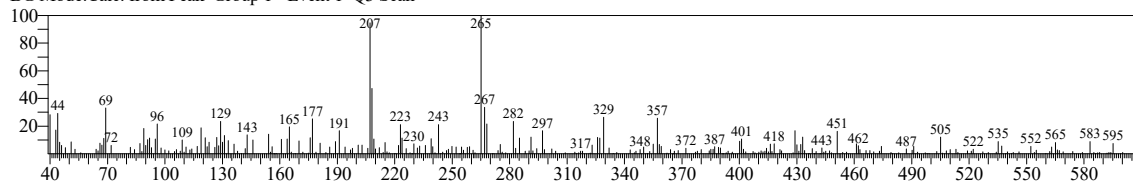

Hit#:1 Entry:179 Library:OA\_TMS\_DB5\_67min\_V3.lib

SI:34 Formula:C<sub>13</sub>H<sub>22</sub>O<sub>3</sub>Si<sub>2</sub> CAS:99-06-9 MolWeight:282 RetIndex:1572

CompName:3-Hydroxybenzoic acid-2TMS ; 3-hydroxybenzoic acid

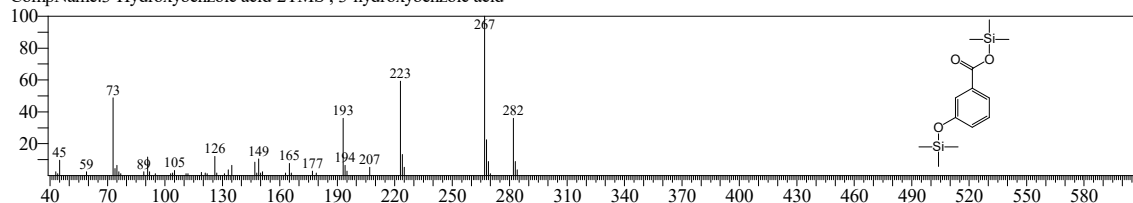

Hit#:2 Entry:211 Library:OA\_TMS\_DB5\_67min\_V3.lib

SI:31 Formula:C<sub>13</sub>H<sub>22</sub>O<sub>3</sub>Si<sub>2</sub> CAS:99-96-7 MolWeight:282 RetIndex:1636

CompName:4-Hydroxybenzoic acid-2TMS ; 4-hydroxybenzoic acid

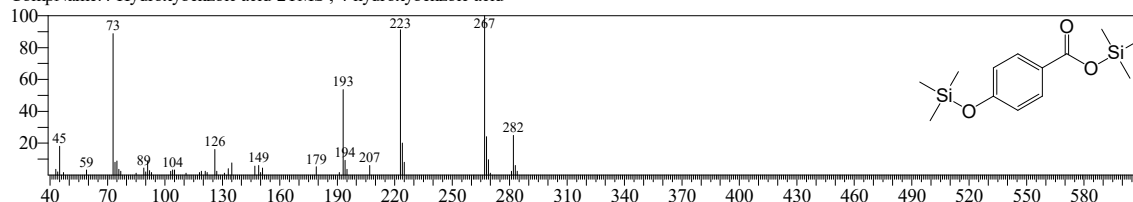

Hit#:3 Entry:310 Library:OA\_TMS\_DB5\_67min\_V3.lib

SI:29 Formula:C<sub>11</sub>H<sub>20</sub>N<sub>4</sub>O<sub>3</sub>Si<sub>2</sub> CAS:68-94-0 MolWeight:280 RetIndex:1822

CompName:Hypoxanthine-2TMS ; 3,7-dihydropurin-6-one

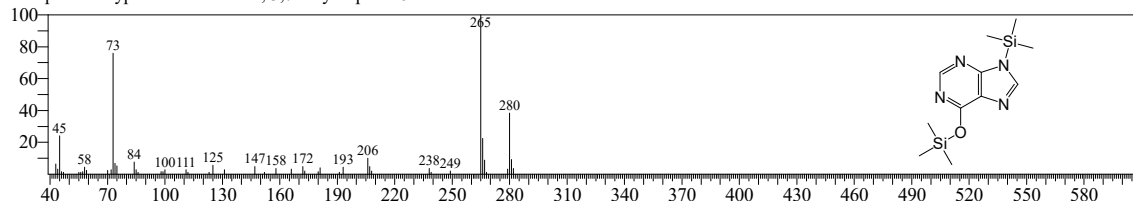

Hit#:4 Entry:291 Library:OA\_TMS\_DB5\_67min\_V3.lib

SI:28 Formula:C<sub>14</sub>H<sub>24</sub>O<sub>4</sub>Si<sub>2</sub> CAS:121-34-6 MolWeight:312 RetIndex:1775

CompName:3-Methoxy-4-hydroxybenzoic acid-2TMS ; 4-hydroxy-3-methoxybenzoic acid

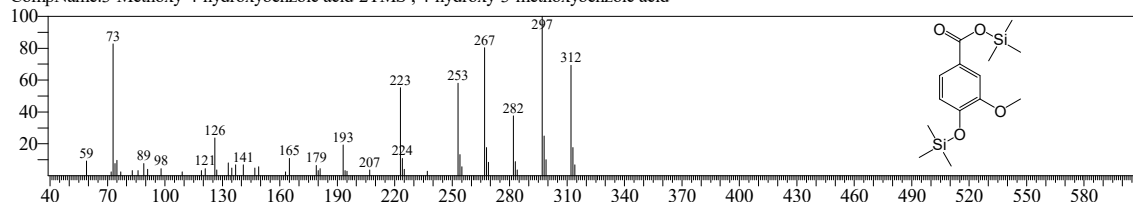

Hit#:5 Entry:359 Library:OA\_TMS\_DB5\_67min\_V3.lib

SI:26 Formula:C<sub>18</sub>H<sub>34</sub>O<sub>5</sub>Si<sub>3</sub> CAS:55-10-7 MolWeight:414 RetIndex:1894

CompName:Vanilmandelic acid-3TMS ; 2-hydroxy-2-(4-hydroxy-3-methoxyphenyl)acetic acid

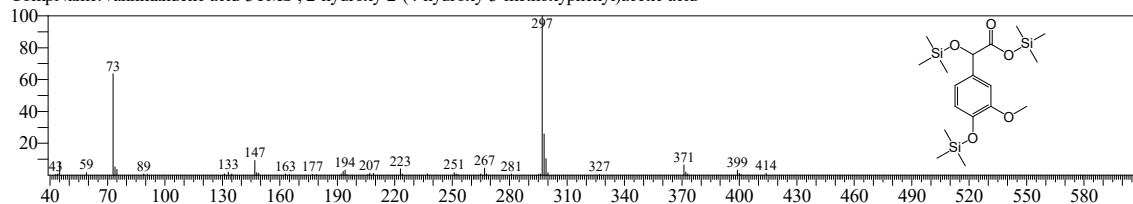

# TNAU

<< Target >>

Line#9 R.Time:31.905(Scan#:5482) MassPeaks:330

RawMode:Averaged 31.900-31.910(5481-5483) BasePeak:207.05(1669)

BG Mode:Calc. from Peak Group 1 - Event 1 Q3 Scan

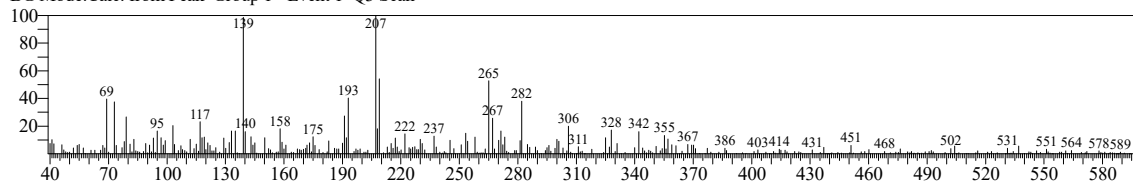

Hit#1 Entry:535 Library:OA\_TMS\_DB5\_67min\_V3.lib

SI:37 Formula:C22H44N4O5Si4 CAS:58-63-9 MolWeight:556 RetIndex:2605

CompName:Inosine-4TMS ; 9-[(2R,3R,4S,5R)-3,4-dihydroxy-5-(hydroxymethyl)oxolan-2-yl]-3H-purin-6-one

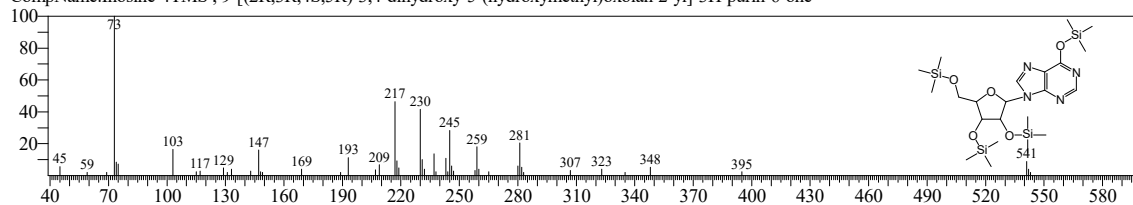

Hit#2 Entry:210 Library:OA\_TMS\_DB5\_67min\_V3.lib

SI:32 Formula:C17H42O5Si4 CAS:10323-20-3 MolWeight:438 RetIndex:1634

CompName:Arabinose-4TMS(1) ; (2S,3R,4R)-2,3,4,5-tetrahydroxypentanal

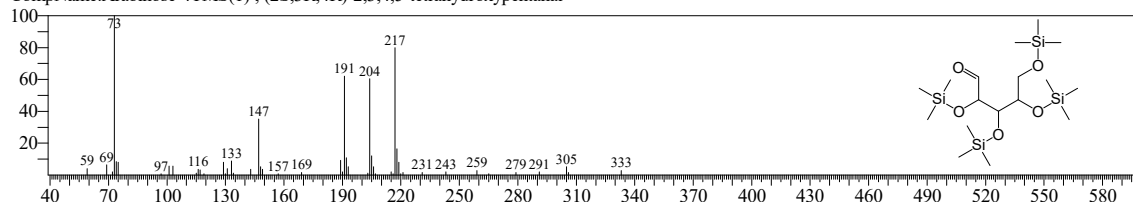

Hit#3 Entry:267 Library:OA\_TMS\_DB5\_67min\_V3.lib

SI:31 Formula:C17H42O5Si4 CAS:58-86-6 MolWeight:438 RetIndex:1732

CompName:Xylose-4TMS(1) ; (2R,3S,4R)-2,3,4,5-tetrahydroxypentanal

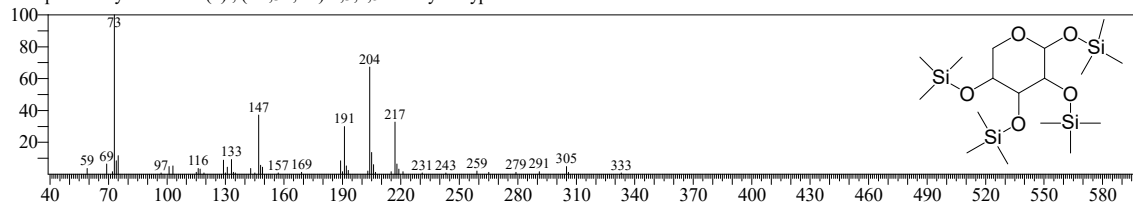

Hit#4 Entry:250 Library:OA\_TMS\_DB5\_67min\_V3.lib

SI:31 Formula:C17H42O5Si4 CAS:50-69-1 MolWeight:438 RetIndex:1691

CompName:Ribose-4TMS(4) ; (3R,4S,5R)-5-(hydroxymethyl)oxolane-2,3,4-triol

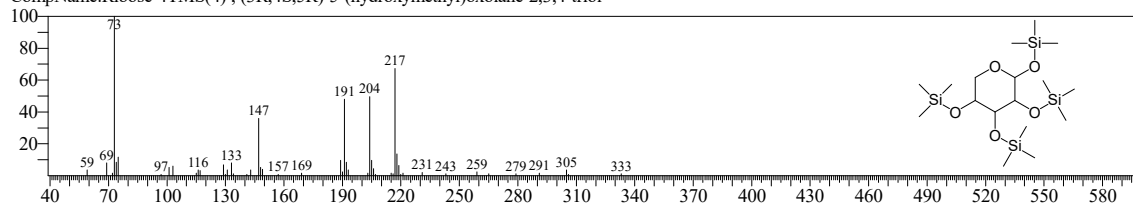

Hit#5 Entry:238 Library:OA\_TMS\_DB5\_67min\_V3.lib

SI:31 Formula:C17H42O5Si4 CAS:1114-34-7 MolWeight:438 RetIndex:1675

CompName:Lyxose-4TMS(2) ; (2S,3S,4R)-2,3,4,5-tetrahydroxypentanal

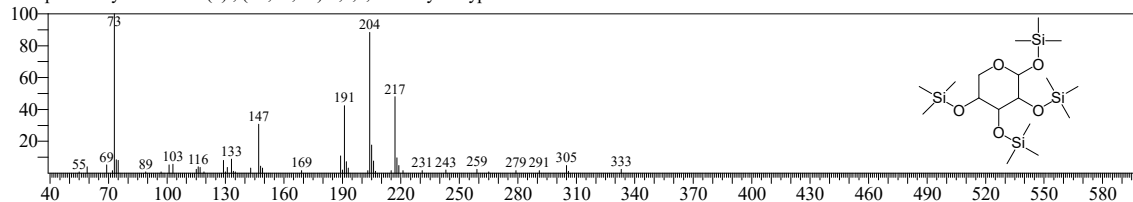

# TNAU

<< Target >>

Line#:10 R.Time:32.835(Scan#:5668) MassPeaks:299

RawMode:Averaged 32.830-32.840(5667-5669) BasePeak:281.05(1612)

BG Mode:Calc. from Peak Group 1 - Event 1 Q3 Scan

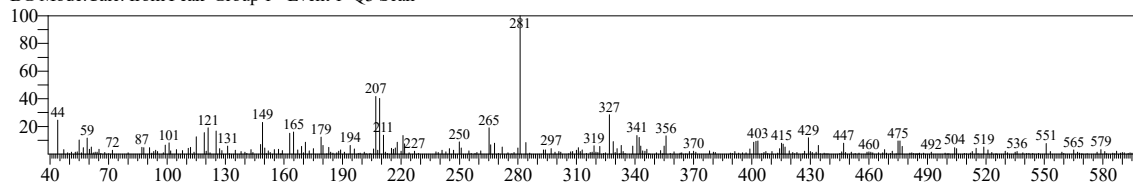

Hit#:1 Entry:413 Library:OA TMS DB5\_67min\_V3.lib

SI:28 Formula:C18H35NO3Si3 CAS:60-18-4 MolWeight:397 RetIndex:1958

CompName:Tyrosine-3TMS ; (2S)-2-amino-3-(4-hydroxyphenyl)propanoic acid

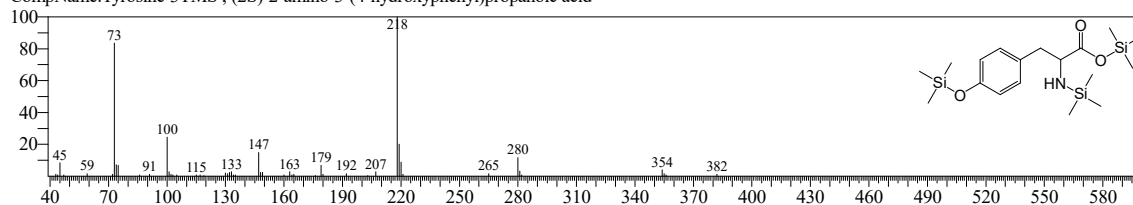

Hit#:2 Entry:203 Library:OA TMS DB5\_67min\_V3.lib

SI:27 Formula:C13H23NO2Si2 CAS:118-92-3 MolWeight:281 RetIndex:1623

CompName:Anthranilic acid-2TMS ; 2-aminobenzoic acid

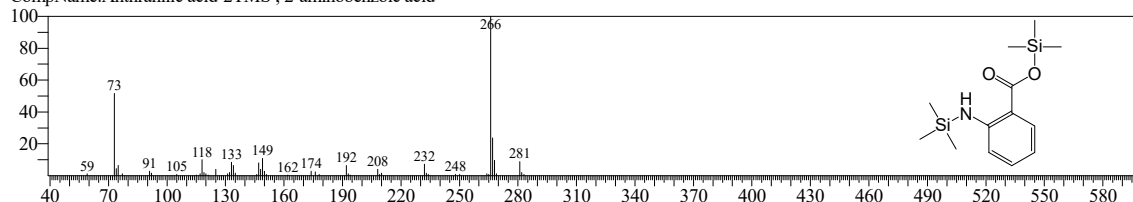

Hit#:3 Entry:402 Library:OA TMS DB5\_67min\_V3.lib

SI:26 Formula:C20H42O4Si4 CAS:775-01-9 MolWeight:458 RetIndex:1942

CompName:3,4-Dihydroxymandelic acid-4TMS ; 2-(3,4-dihydroxyphenyl)-2-hydroxyacetic acid

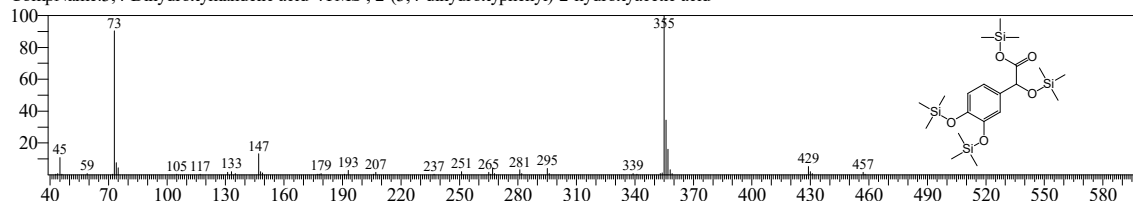

Hit#:4 Entry:382 Library:OA TMS DB5\_67min\_V3.lib

SI:26 Formula:C18H34O4Si3 CAS:6482-98-0 MolWeight:398 RetIndex:1918

CompName:4-Hydroxyphenyllactic acid-3TMS ; 2-hydroxy-3-(4-hydroxyphenyl)propanoate

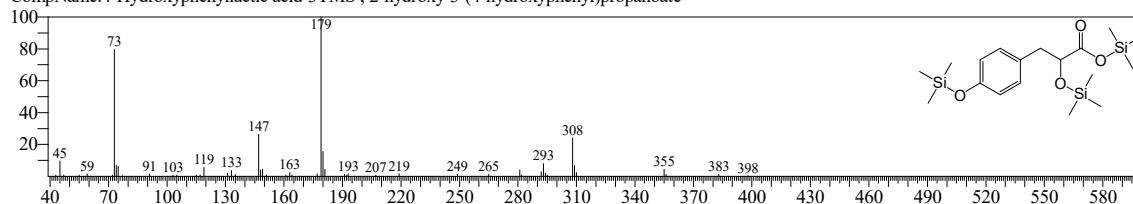

Hit#:5 Entry:463 Library:OA TMS DB5\_67min\_V3.lib

SI:25 Formula:C21H43NO4Si4 CAS:59-92-7 MolWeight:485 RetIndex:2123

CompName:Dopa-4TMS ; (2S)-2-amino-3-(3,4-dihydroxyphenyl)propanoic acid

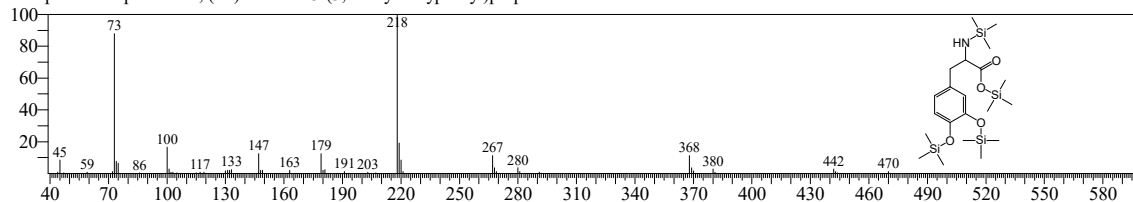

Supplement: Supplementary file 34 [file supplementary]
