# Supplementary material for: Comparative Metabolomics Profiling Reveals Key Metabolites and Associated Pathways Regulating Tuber Dormancy in White Yam (<em>Dioscorea rotundata</em>)
Source: Preprints.org preprint supplement (doi:10.20944/preprints202303.0378.v1), 2023-03-21

# TNAU

## Sample Information

Analyzed by : Admin  
 Analyzed : 01-Sep-22 9:58:17 PM  
 Sample Type : Unknown  
 Level # : 1  
 Sample Name : Sample  
 Sample ID : 2-2  
 IS Amount : [1]=1  
 Sample Amount : 1  
 Dilution Factor : 1  
 Vial # : 3  
 Injection Volume : 2.00  
 Data File : D:\GCMS-8040NX\Sep 2022\Users\01.09.2022\01092022006.qgd  
 Org Data File : D:\GCMS-8040NX\Sep 2022\Users\01.09.2022\01092022006.qgd  
 Method File : D:\GCMS-8040NX\Sep 2022\Method\Scan\_methodfile.qgm  
 Org Method File : D:\GCMS-8040NX\Sep 2022\Method\Scan\_methodfile.qgm  
 Report File :  
 Tuning File : D:\GCMS-8040NX\Aug 2022\Tuning Data\TUNING 25082022.qgt  
 Modified by : Admin  
 Modified : 05-Sep-22 10:57:21 AM

Chromatogram Sample D:\GCMS-8040NX\Sep 2022\Users\01.09.2022\01092022006.qgd

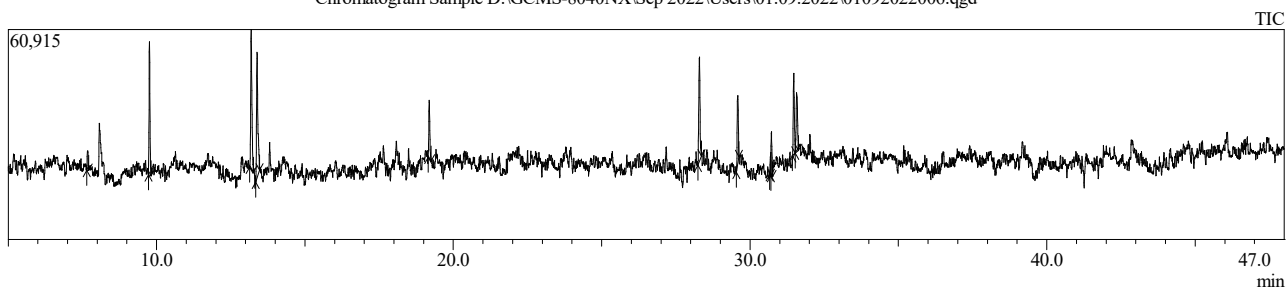

## Peak Report TIC

| Peak# | R.Time | Area   | Area%  | Height | Height% | A/H  | Similarity | Name                                    |
|-------|--------|--------|--------|--------|---------|------|------------|-----------------------------------------|
| 1     | 7.679  | 12994  | 1.98   | 5705   | 2.32    | 2.28 | 40         | Protocatechuic acid-3TMS                |
| 2     | 9.762  | 83320  | 12.71  | 38754  | 15.74   | 2.15 | 96         | Pentasiloxane, dodecamethyl-            |
| 3     | 13.188 | 114570 | 17.47  | 40421  | 16.41   | 2.83 | 52         | Methyl cis-13,16-Docosadienate          |
| 4     | 13.386 | 114337 | 17.44  | 36521  | 14.83   | 3.13 | 54         | Methyl cis-13,16-Docosadienate          |
| 5     | 19.190 | 40315  | 6.15   | 16959  | 6.89    | 2.38 | 91         | 2,4-Di-tert-butylphenoxytrimethylsilane |
| 6     | 28.293 | 84149  | 12.83  | 30184  | 12.26   | 2.79 | 94         | n-Hexadecanoic acid                     |
| 7     | 29.588 | 51548  | 7.86   | 19646  | 7.98    | 2.62 | 89         | Scyllo-Inositol, 6TMS                   |
| 8     | 30.680 | 9660   | 1.47   | 4539   | 1.84    | 2.13 | 11         | N-Butyrylglycine-2TMS                   |
| 9     | 30.720 | 27521  | 4.20   | 12820  | 5.21    | 2.15 | 81         | Myo-Inositol, 6TMS                      |
| 10    | 31.472 | 63150  | 9.63   | 23509  | 9.55    | 2.69 | 93         | 10E,12Z-Octadecadienoic acid            |
| 11    | 31.571 | 54073  | 8.25   | 17203  | 6.99    | 3.14 | 91         | 9,12,15-Octadecatrienoic acid, (Z,Z,Z)- |
|       |        | 655637 | 100.00 | 246261 | 100.00  |      |            |                                         |

Library

# TNAU

<< Target >>

Line#:1 R.Time:7.680(Scan#:537) MassPeaks:394

RawMode:Averaged 7.675-7.685(536-538) BasePeak:311.00(432)

BG Mode:Calc. from Peak Group 1 - Event 1 Q3 Scan

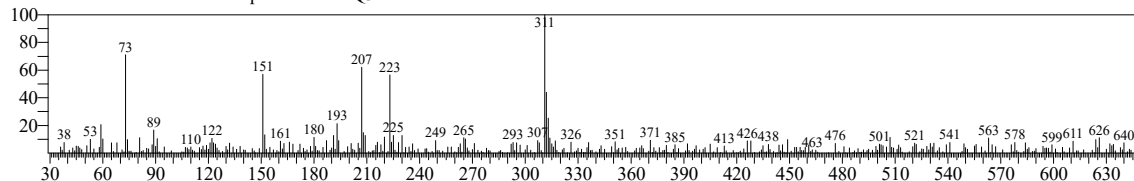

Hit#:1 Entry:315 Library:OA\_TMS\_DB5\_67min\_V3.lib

SI:40 Formula:C16H30O4Si3 CAS:99-50-3 MolWeight:370 RetIndex:1833

CompName:Protocatechuic acid-3TMS ; 3,4-dihydroxybenzoic acid

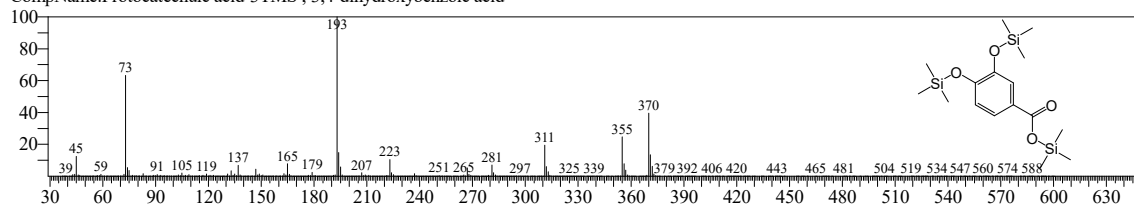

Hit#:2 Entry:482 Library:OA\_TMS\_DB5\_67min\_V3.lib

SI:40 Formula: C15H10N4O CAS:0-00-0 MolWeight:430 RetIndex:2214

CompName:Kynurenine-d6-3TMS ;

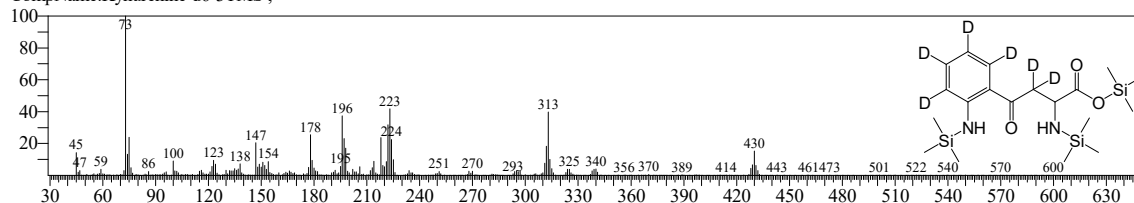

Hit#:3 Entry:294 Library:OA\_TMS\_DB5\_67min\_V3.lib

SI:37 Formula:C15H26O4Si2 CAS:306-08-1 MolWeight:326 RetIndex:1782

CompName:Homovanillic acid-2TMS ; 2-(4-hydroxy-3-methoxyphenyl)acetic acid

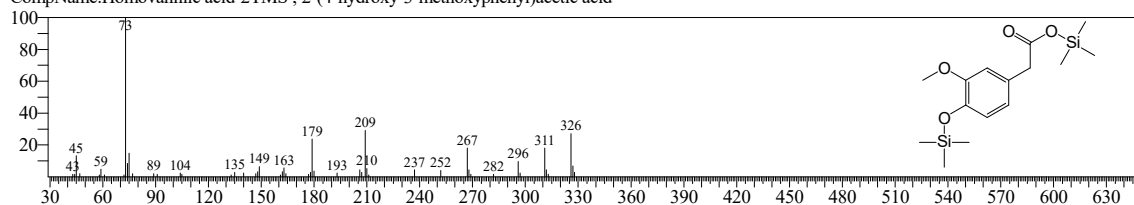

Hit#:4 Entry:338 Library:OA\_TMS\_DB5\_67min\_V3.lib

SI:34 Formula:C15H28N2O3Si2 CAS:66-72-8 MolWeight:340 RetIndex:1858

CompName:Pyridoxal-meto-2TMS(1) ; 3-hydroxy-5-(hydroxymethyl)-2-methylpyridine-4-carbaldehyde

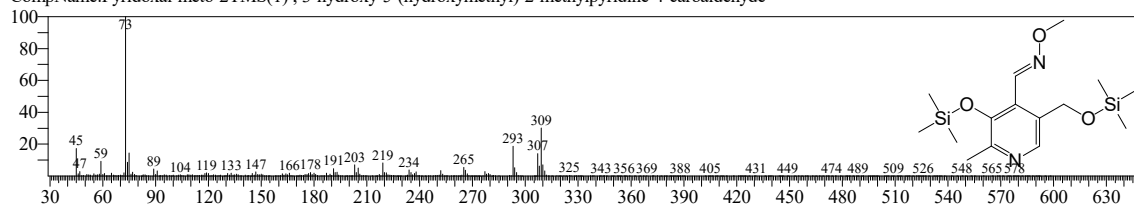

Hit#:5 Entry:256 Library:OA\_TMS\_DB5\_67min\_V3.lib

SI:32 Formula: C15H28N2O3Si2 CAS:0-00-0 MolWeight:472 RetIndex:1698

CompName:Ribose-13C5-meto-4TMS ;

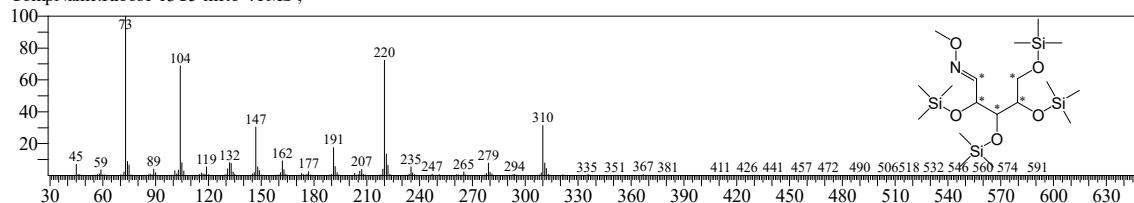

# TNAU

<< Target >>

Line#:2 R.Time:9.760(Scan#:953) MassPeaks:384

RawMode:Averaged 9.755-9.765(952-954) BasePeak:281.05(8752)

BG Mode:Calc. from Peak Group 1 - Event 1 Q3 Scan

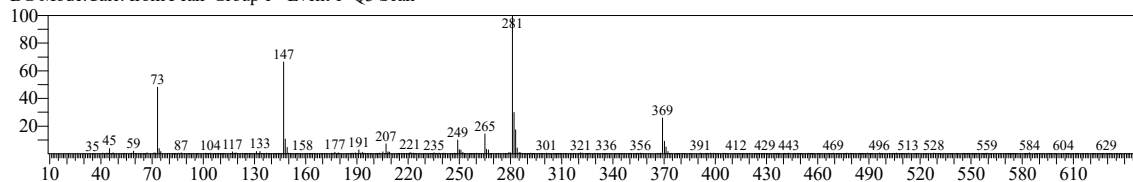

Hit#:1 Entry:40975 Library:NIST20R.lib

SI:96 Formula:C<sub>12</sub>H<sub>36</sub>O<sub>4</sub>Si<sub>5</sub> CAS:141-63-9 MolWeight:384 RetIndex:1068

CompName:Pentasiloxane, dodecamethyl- \$\$ Dodecamethylpentasiloxane \$\$ 1,1,1,3,3,5,5,7,7,9,9,9-Dodecamethylpentasiloxane #

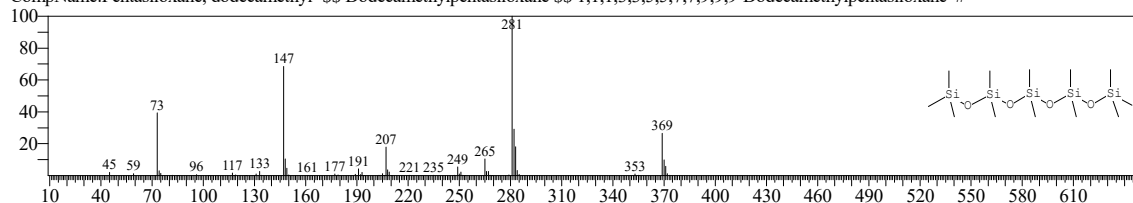

Hit#:2 Entry:249272 Library:NIST20M1.lib

SI:85 Formula:C<sub>12</sub>H<sub>36</sub>O<sub>4</sub>Si<sub>5</sub> CAS:3555-47-3 MolWeight:384 RetIndex:1068

CompName:Trisiloxane, 1,1,1,5,5,5-hexamethyl-3,3-bis[(trimethylsilyl)oxy]- \$\$ Tetrakis(trimethylsiloxy)silane \$\$ Trisiloxane, 1,1,1,5,5,5-hexamethyl-3,3-b

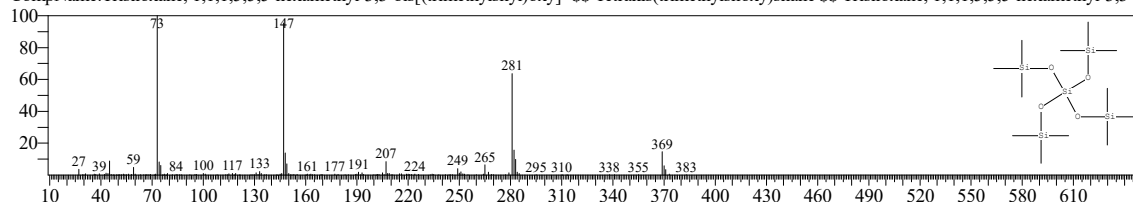

Hit#:3 Entry:27848 Library:NIST20M2.lib

SI:83 Formula:C<sub>18</sub>H<sub>48</sub>O<sub>4</sub>Si<sub>5</sub> CAS:0-00-0 MolWeight:468 RetIndex:1495

CompName:1,3,5,7,9-Pentasiloxane, 1,1,3,3,5,5,7,7,9,9-decamethyl-1,9-di(tert.butyl)-

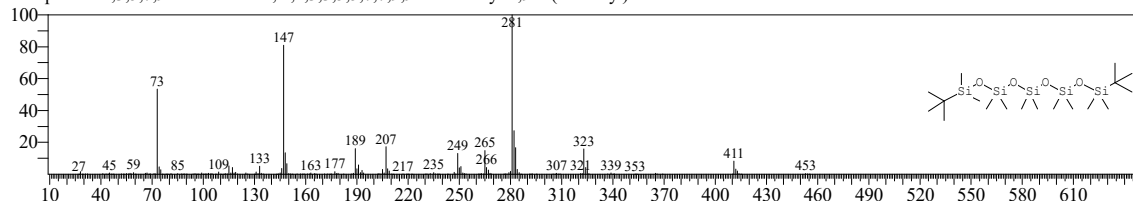

Hit#:4 Entry:249271 Library:NIST20M1.lib

SI:80 Formula:C<sub>12</sub>H<sub>36</sub>O<sub>4</sub>Si<sub>5</sub> CAS:38146-99-5 MolWeight:384 RetIndex:1068

CompName:1,1,1,3,5,5,7,7-Nonamethyl-3-(trimethylsiloxy)tetrasiloxane \$\$ 1,1,1,3,3,5,5,7,7-Nonamethyl-5-[(trimethylsilyl)oxy]tetrasiloxane #

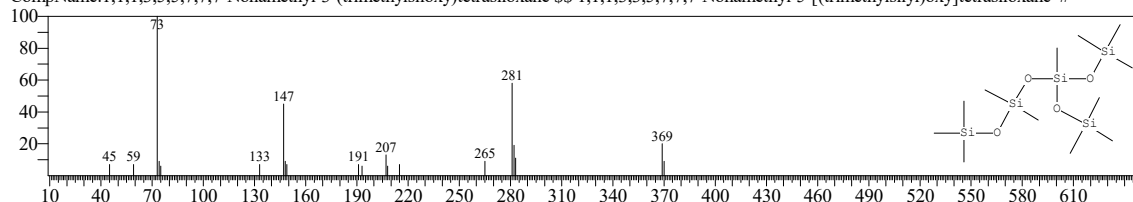

Hit#:5 Entry:158097 Library:NIST20M1.lib

SI:77 Formula:C<sub>14</sub>H<sub>24</sub>O<sub>3</sub>Si<sub>2</sub> CAS:0-00-0 MolWeight:296 RetIndex:1625

CompName:2,6-Dihydroxyacetophenone, 2TMS derivative \$\$ 2',6'-Dihydroxyacetophenone, bis(trimethylsilyl) ether

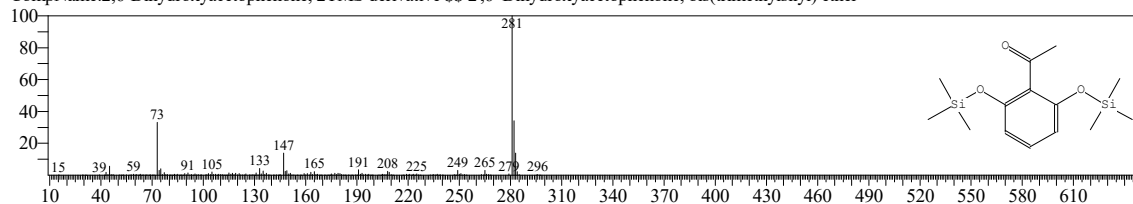

# TNAU

<< Target >>

Line#3 R.Time:13.185(Scan#:1638) MassPeaks:338

RawMode:Averaged 13.180-13.190(1637-1639) BasePeak:155.10(6137)

BG Mode:Calc. from Peak Group 1 - Event 1 Q3 Scan

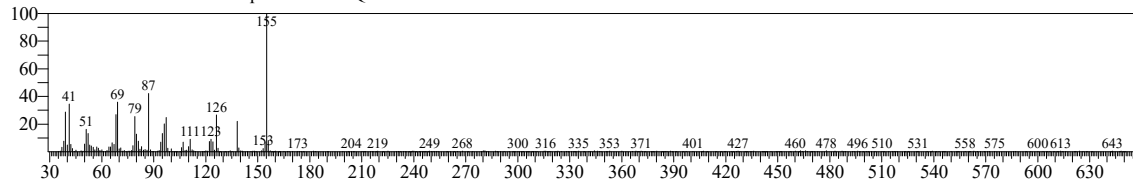

Hit#1 Entry:34 Library:FA\_ME\_SP2560\_EI\_V3.lib

SI:52 Formula:C23H42O2 CAS:7370-49-2 MolWeight:350 RetIndex:3169

CompName:Methyl cis-13,16-Docosadienate ; (13Z,16E)-docosa-13,16-dienoic acid

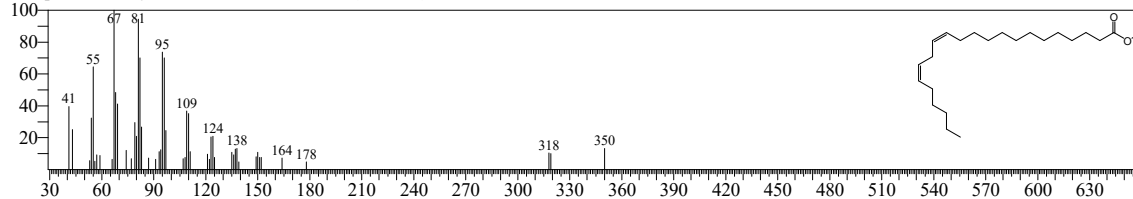

Hit#2 Entry:11 Library:FA\_ME\_SP2560\_EI\_V3.lib

SI:51 Formula:C16H30O2 CAS:84743-29-3 MolWeight:254 RetIndex:2388

CompName:Methyl cis-10-pentadecenoate ; (Z)-pentadec-10-enoic acid

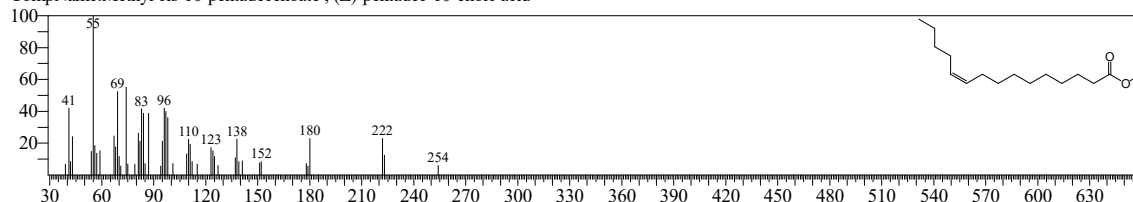

Hit#3 Entry:21 Library:FA\_ME\_SP2560\_EI\_V3.lib

SI:51 Formula:C19H34O2 CAS:60-33-3 MolWeight:294 RetIndex:2775

CompName:Methyl linoleate ; Octadeca-9,12-dienoic acid

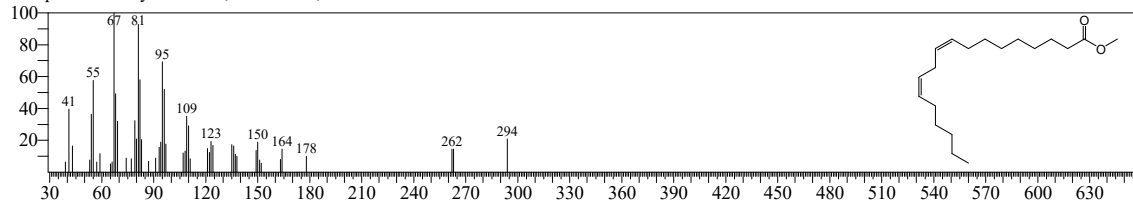

Hit#4 Entry:20 Library:FA\_ME\_SP2560\_EI\_V3.lib

SI:50 Formula:C19H34O2 CAS:506-21-8 MolWeight:294 RetIndex:2727

CompName:Methyl linoleate ; (9E,12E)-octadeca-9,12-dienoic acid

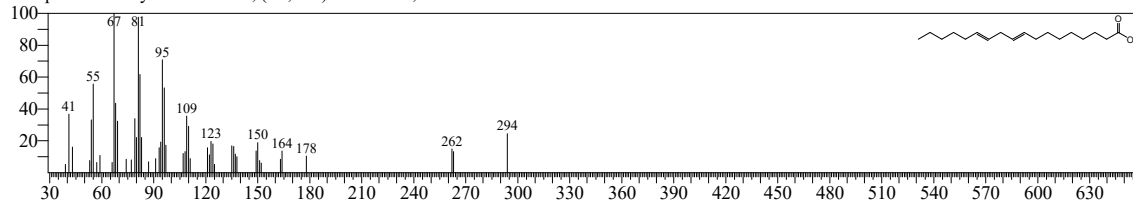

Hit#5 Entry:27 Library:FA\_ME\_SP2560\_EI\_V3.lib

SI:50 Formula:C21H38O2 CAS:2091-39-6 MolWeight:322 RetIndex:2973

CompName:Methyl cis-11,14-Icosadienoate ; ; Icosa-11,14-dienoic acid

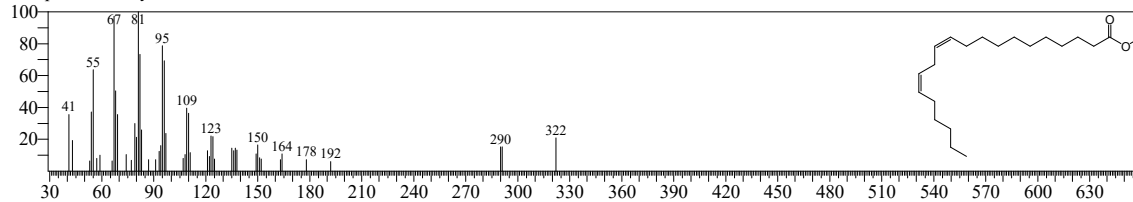

# TNAU

<< Target >>

Line#:4 R.Time:13.385(Scan#:1678) MassPeaks:354

RawMode:Averaged 13.380-13.390(1677-1679) BasePeak:155.05(5555)

BG Mode:Calc. from Peak Group 1 - Event 1 Q3 Scan

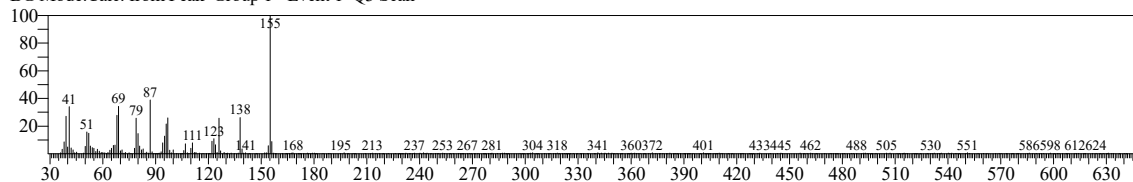

Hit#:1 Entry:34 Library:FA\_ME\_SP2560\_EI\_V3.lib

SI:54 Formula:C23H42O2 CAS:7370-49-2 MolWeight:350 RetIndex:3169

CompName:Methyl cis-13,16-Docosadienate ; (13Z,16E)-docosa-13,16-dienoic acid

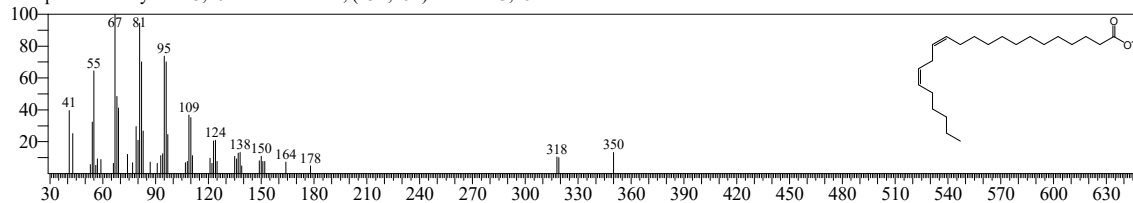

Hit#:2 Entry:21 Library:FA\_ME\_SP2560\_EI\_V3.lib

SI:53 Formula:C19H34O2 CAS:60-33-3 MolWeight:294 RetIndex:2775

CompName:Methyl linoleate ; Octadeca-9,12-dienoic acid

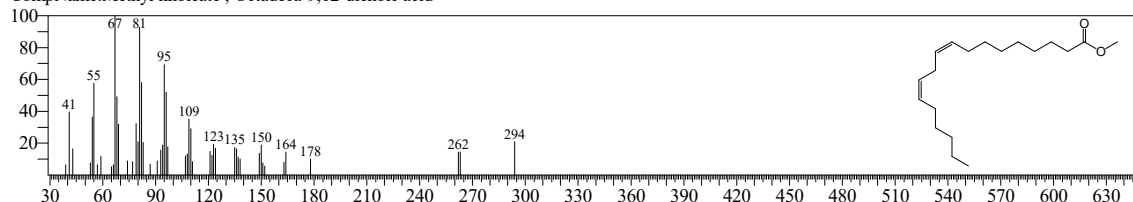

Hit#:3 Entry:20 Library:FA\_ME\_SP2560\_EI\_V3.lib

SI:53 Formula:C19H34O2 CAS:506-21-8 MolWeight:294 RetIndex:2727

CompName:Methyl linolelaidate ; (9E,12E)-octadeca-9,12-dienoic acid

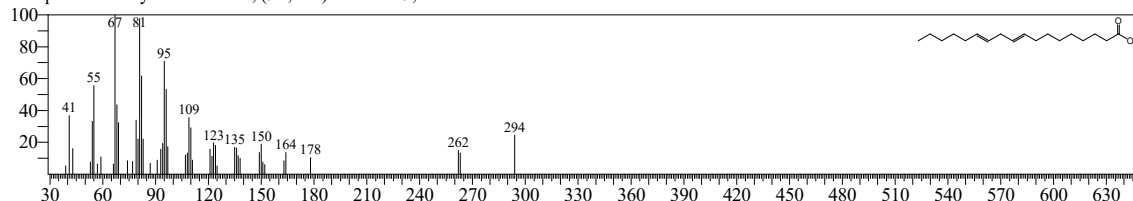

Hit#:4 Entry:27 Library:FA\_ME\_SP2560\_EI\_V3.lib

SI:52 Formula:C21H38O2 CAS:2091-39-6 MolWeight:322 RetIndex:2973

CompName:Methyl cis-11,14-Icosadienoate ; Icosa-11,14-dienoic acid

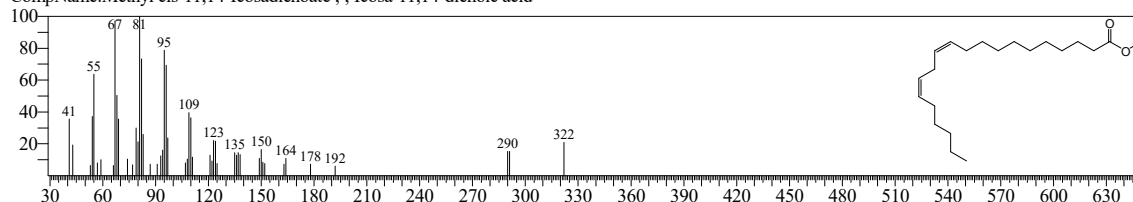

Hit#:5 Entry:11 Library:FA\_ME\_SP2560\_EI\_V3.lib

SI:52 Formula:C16H30O2 CAS:84743-29-3 MolWeight:254 RetIndex:2388

CompName:Methyl cis-10-pentadecenoate ; (Z)-pentadec-10-enoic acid

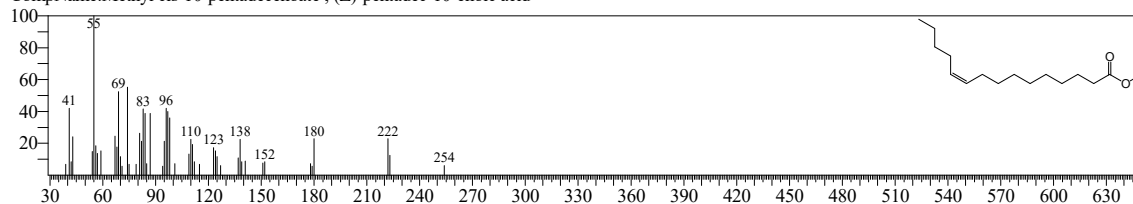

# TNAU

<< Target >>

Line#5 R.Time:19.190(Scan#:2839) MassPeaks:331

RawMode:Averaged 19.185-19.195(2838-2840) BasePeak:263.20(6865)

BG Mode:Calc. from Peak Group 1 - Event 1 Q3 Scan

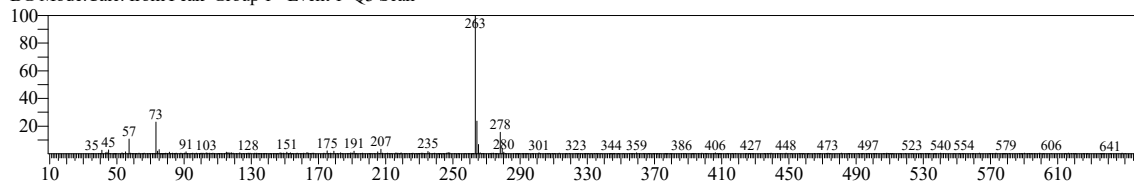

Hit#:1 Entry:33874 Library:NIST20R.lib

SI:91 Formula:C<sub>17</sub>H<sub>30</sub>O<sub>3</sub>Si CAS:53925-65-8 MolWeight:278 RetIndex:1632

CompName:2,4-Di-tert-butylphenoxytrimethylsilane \$ \$ Benzene, 2,4-bis(1,1-dimethylethyl)-1-[(trimethylsilyl)oxy]- \$ \$ Silane, [2,4-bis(1,1-dimethylethyl)ph

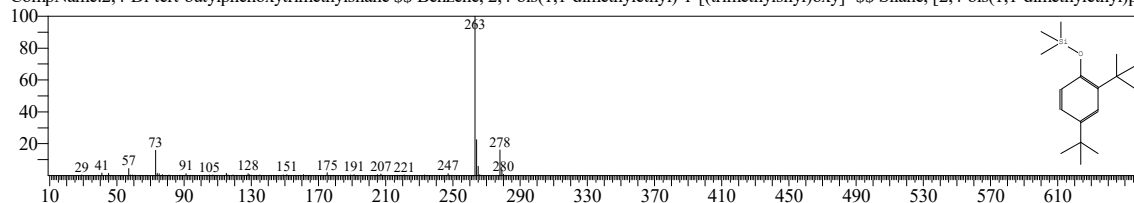

Hit#:2 Entry:33871 Library:NIST20R.lib

SI:84 Formula:C<sub>17</sub>H<sub>30</sub>O<sub>3</sub>Si CAS:10416-73-6 MolWeight:278 RetIndex:1632

CompName:2,6-Bis(tert-butyl)phenol, TMS derivative \$ \$ Trimethyl(2,6 ditert-butylphenoxy)silane \$ \$ (2,6-Ditert-butylphenoxy)(trimethyl)silane #

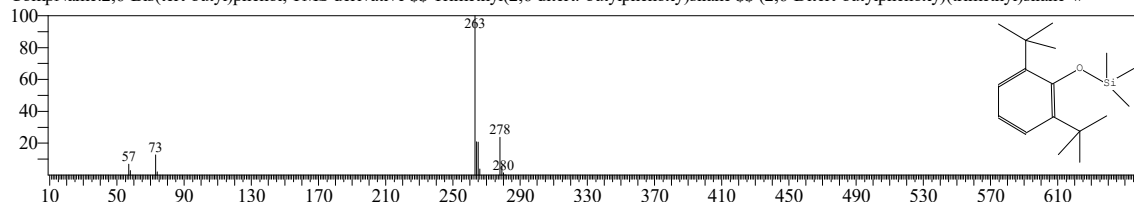

Hit#:3 Entry:136557 Library:NIST20M1.lib

SI:83 Formula:C<sub>12</sub>H<sub>22</sub>N<sub>4</sub>Si<sub>2</sub> CAS:0-00-0 MolWeight:278 RetIndex:1703

CompName:3-Deazaadenine, 2TMS \$ \$ 3-Deazaadenine, N,N'-bis-TMS \$ \$ 1H-Imidazo[4,5-c]pyridin-4-amine, N,N'-bis-TMS

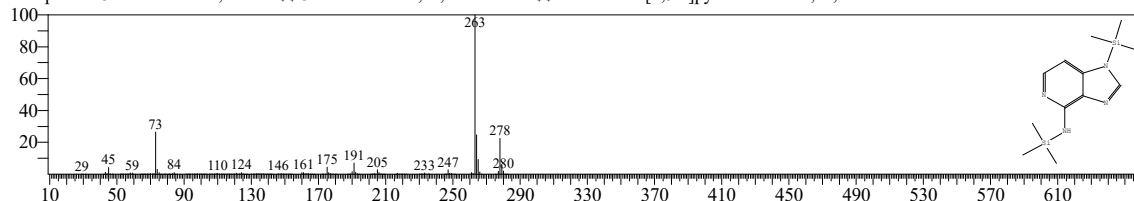

Hit#:4 Entry:137020 Library:NIST20M1.lib

SI:79 Formula:C<sub>15</sub>H<sub>22</sub>O<sub>3</sub>Si CAS:0-00-0 MolWeight:278 RetIndex:1736

CompName:6-Methoxy-2,2-dimethyl-2,3-dihydro-4H-chromen-4-one, TMS \$ \$ 6-Methoxy-2,2-dimethyl-chroman-4-one, O-trimethylsilyl- \$ \$ 4H-1-Benzopy

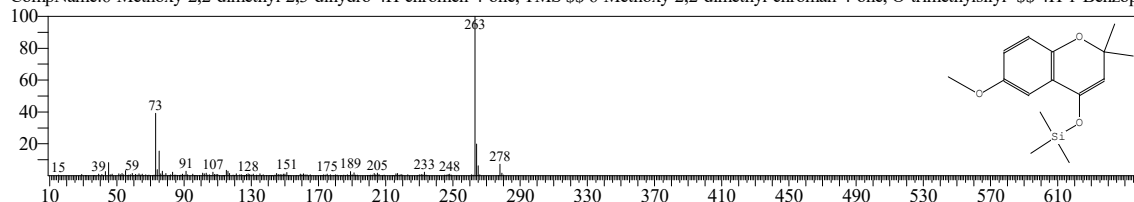

Hit#:5 Entry:136556 Library:NIST20M1.lib

SI:79 Formula:C<sub>12</sub>H<sub>22</sub>N<sub>4</sub>Si<sub>2</sub> CAS:0-00-0 MolWeight:278 RetIndex:1606

CompName:1H,1'H-2,2'-Biimidazole, 2TMS \$ \$ 1H,1'H-2,2'-Biimidazole, N,N'-bis-TMS \$ \$ 1H,1'H-[2,2']Biimidazolyl, 2TMS \$ \$ 2,2'-Bi-1H-imidazole, 2TMS

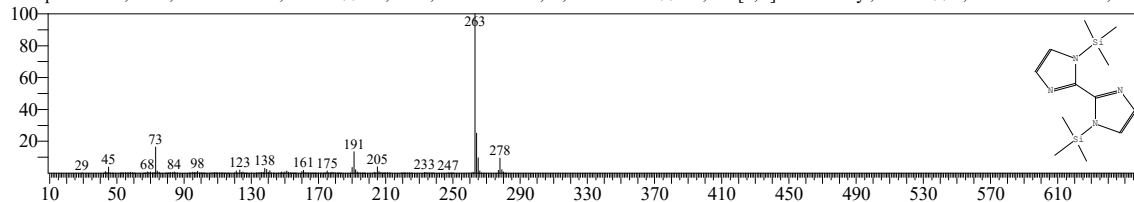

# TNAU

<< Target >>

Line#6 R.Time:28.295(Scan#:4660) MassPeaks:329

RawMode:Averaged 28.290-28.300(4659-4661) BasePeak:73.05(2524)

BG Mode:Calc. from Peak Group 1 - Event 1 Q3 Scan

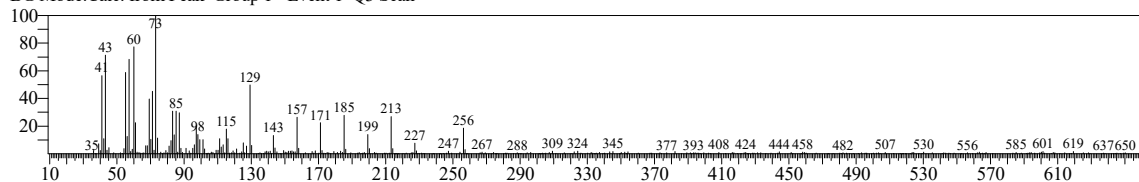

Hit#1 Entry:31600 Library:NIST20R.lib

SI:94 Formula:C16H32O2 CAS:57-10-3 MolWeight:256 RetIndex:1968

CompName:n-Hexadecanoic acid \$\$ Hexadecanoic acid \$\$ n-Hexadecic acid \$\$ Palmitic acid \$\$ Pentadecanecarboxylic acid \$\$ 1-Pentadecanecarboxylic

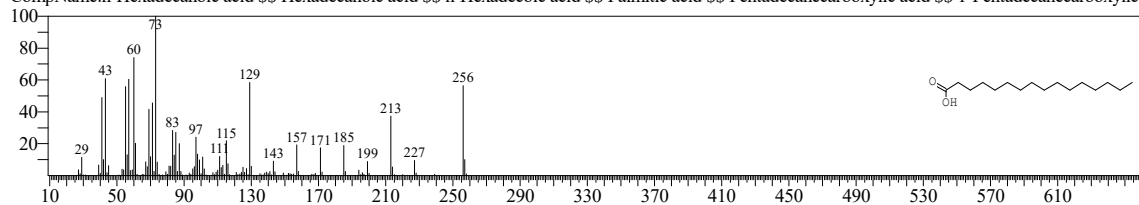

Hit#2 Entry:29890 Library:NIST20R.lib

SI:92 Formula:C15H30O2 CAS:1002-84-2 MolWeight:242 RetIndex:1869

CompName:Pentadecanoic acid \$\$ Pentadecylic acid \$\$ n-Pentadecanoic acid \$\$ n-Pentadecylic acid

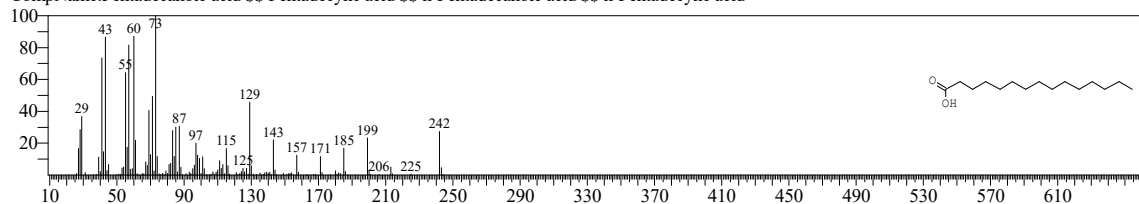

Hit#3 Entry:44286 Library:NIST20M2.lib

SI:91 Formula:C38H68O8 CAS:28474-90-0 MolWeight:652 RetIndex:4765

CompName:l-(+)-Ascorbic acid 2,6-dihexadecanoate

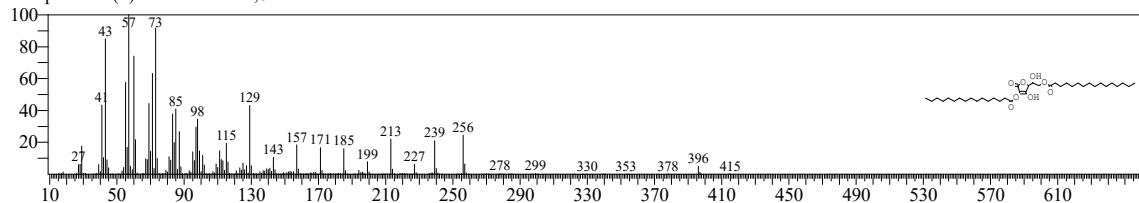

Hit#4 Entry:144781 Library:NIST20M1.lib

SI:90 Formula:C18H36O2 CAS:57-11-4 MolWeight:284 RetIndex:2167

CompName:Octadecanoic acid \$\$ Stearic acid \$\$ n-Octadecanoic acid \$\$ Humko Industriene R \$\$ Hydrofol Acid 150 \$\$ Hystrene S-97 \$\$ Hystrene T-70 \$

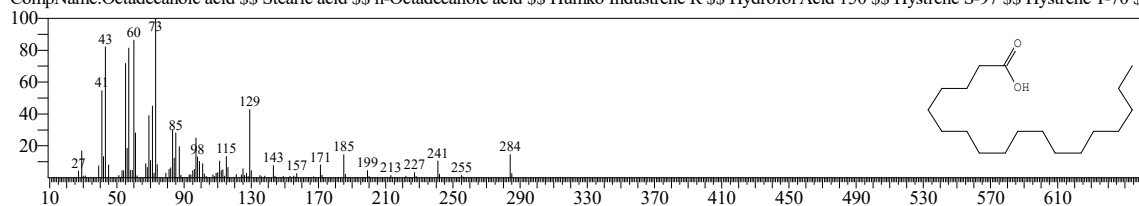

Hit#5 Entry:81713 Library:NIST20M1.lib

SI:90 Formula:C14H28O2 CAS:544-63-8 MolWeight:228 RetIndex:1769

CompName:Tetradecanoic acid \$\$ Myristic acid \$\$ n-Tetradecanoic acid \$\$ n-Tetradecic acid \$\$ Neo-Fat 14 \$\$ Univol U 316S \$\$ 1-Tridecanecarboxylic ;

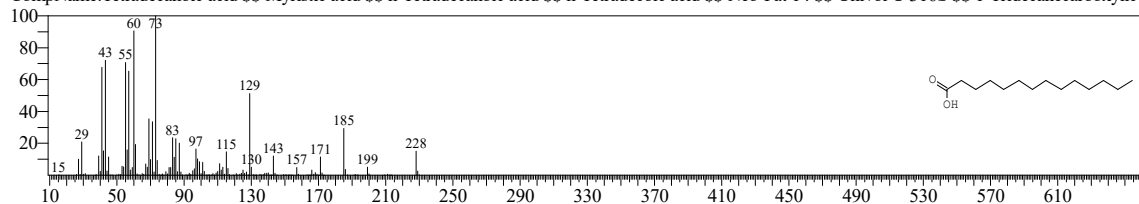

# TNAU

<< Target >>

Line#:7 R.Time:29.590(Scan#:4919) MassPeaks:347

RawMode:Averaged 29.585-29.595(4918-4920) BasePeak:318.15(2854)

BG Mode:Calc. from Peak Group 1 - Event 1 Q3 Scan

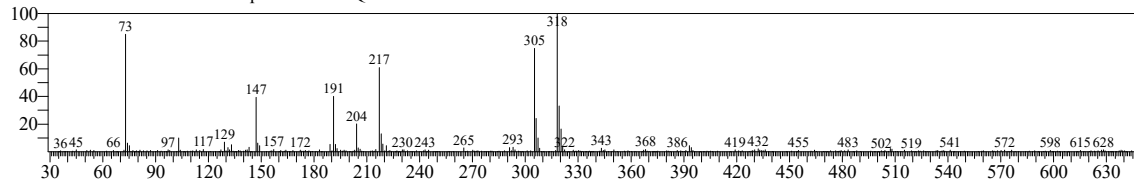

Hit#:1 Entry:43144 Library:NIST20M2.lib

SI:89 Formula:C<sub>24</sub>H<sub>60</sub>O<sub>6</sub>Si<sub>6</sub> CAS:14251-18-4 MolWeight:612 RetIndex:2194

CompName:Scyllo-Inositol, 6TMS \$\$ Inositol, 1,2,3,4,5,6-hexakis-O-(trimethylsilyl)-, scyllo- \$\$ Trimethyl((2,3,4,5,6-pentakis[(trimethylsilyl)oxy]cyclohex

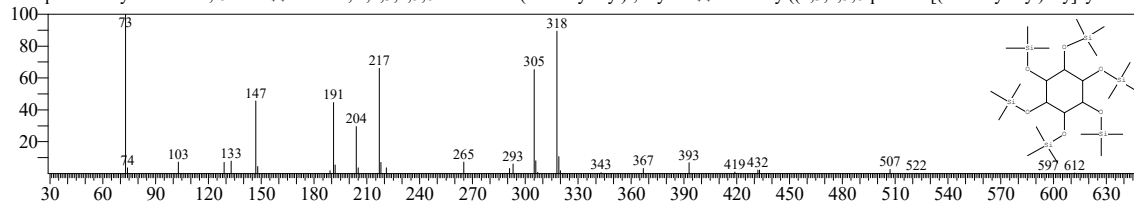

Hit#:2 Entry:43552 Library:NIST20R.lib

SI:88 Formula:C<sub>24</sub>H<sub>60</sub>O<sub>6</sub>Si<sub>6</sub> CAS:2582-79-8 MolWeight:612 RetIndex:2194

CompName:Myo-Inositol, 6TMS \$\$ myo-Inositol, 1,2,3,4,5,6-hexakis-O-(trimethylsilyl)- \$\$ Inositol, 1,2,3,4,5,6-hexakis-O-(trimethylsilyl)-, myo- \$\$ Trime

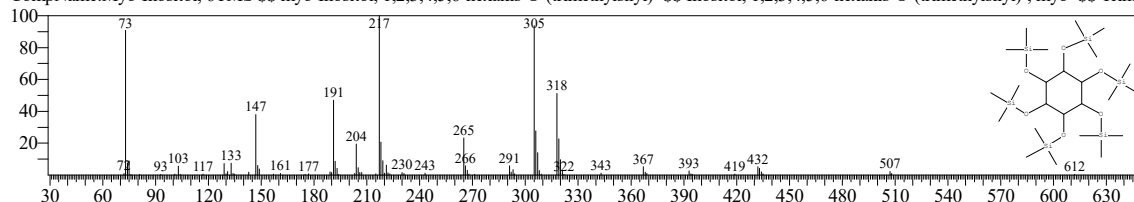

Hit#:3 Entry:465 Library:OA\_TMS\_DB\_67min\_V3.lib

SI:88 Formula:C<sub>24</sub>H<sub>60</sub>O<sub>6</sub>Si<sub>6</sub> CAS:87-89-8 MolWeight:612 RetIndex:2132

CompName:Inositol-6TMS(2) ; cyclohexane-1,2,3,4,5,6-hexol

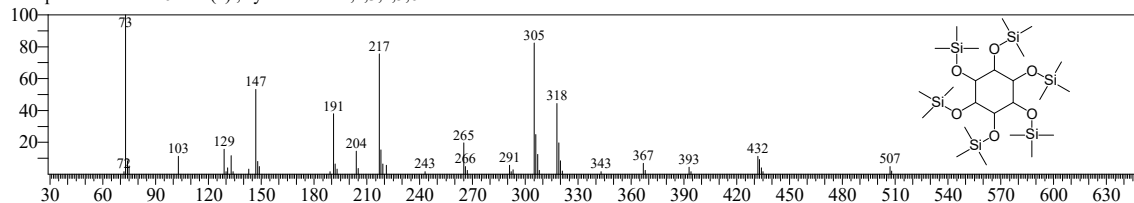

Hit#:4 Entry:43146 Library:NIST20M2.lib

SI:81 Formula:C<sub>24</sub>H<sub>60</sub>O<sub>6</sub>Si<sub>6</sub> CAS:29267-01-4 MolWeight:612 RetIndex:2194

CompName:Inositol, epi-, 6TMS \$\$ Inositol, 1,2,3,4,5,6-hexakis-O-(trimethylsilyl)-, epi- \$\$ Trimethyl((2,3,4,5,6-pentakis[(trimethylsilyl)oxy]cyclohexyl)ox

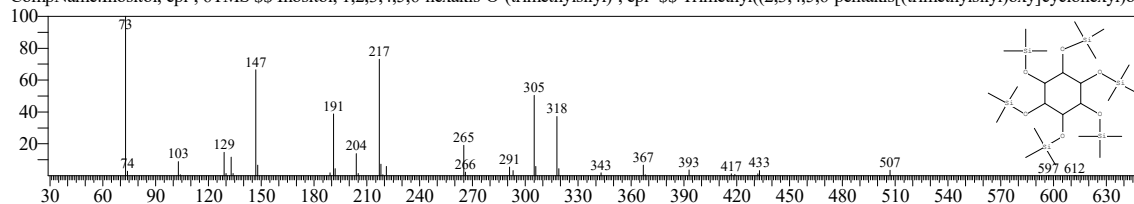

Hit#:5 Entry:43145 Library:NIST20M2.lib

SI:80 Formula:C<sub>24</sub>H<sub>60</sub>O<sub>6</sub>Si<sub>6</sub> CAS:29412-26-8 MolWeight:612 RetIndex:2194

CompName:Muco-Inositol, 6TMS \$\$ Inositol, 1,2,3,4,5,6-hexakis-O-(trimethylsilyl)-, muco- \$\$ Trimethyl((2,3,4,5,6-pentakis[(trimethylsilyl)oxy]cyclohexyl)ox

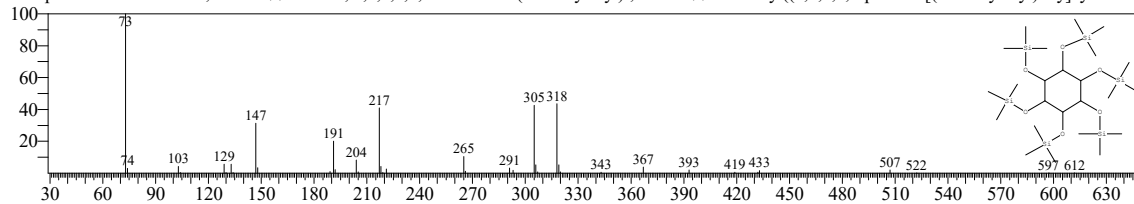



<< Target >>

Line#:8 R.Time:30.680(Scan#:5137) MassPeaks:325

RawMode:Averaged 30.675-30.685(5136-5138) BasePeak:626.00(48)

BG Mode:Calc. from Peak Group 1 - Event 1 Q3 Scan

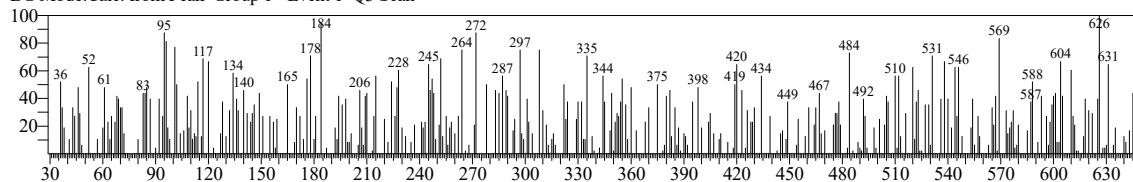

Hit#:1 Entry:141 Library:OA TMS DB5\_67min\_V3.lib

SI:11 Formula:C12H27NO3Si2 CAS:20208-73-5 MolWeight:289 RetIndex:1490

CompName:N-Butyrylglycine-2TMS ; 2-(butanoylamino)acetic acid

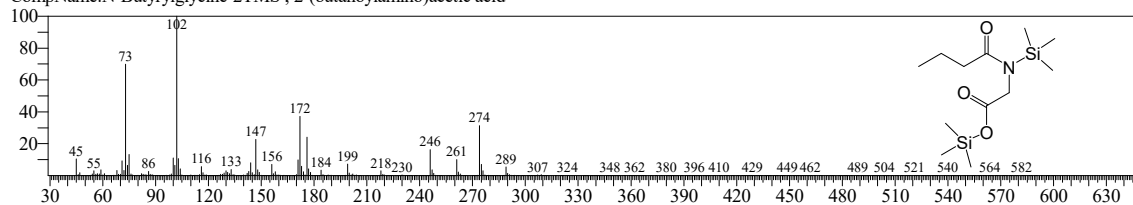

Hit#:2 Entry:488 Library:OA TMS DB5\_67min\_V3.lib

SI:11 Formula: CAS:0-00-0 MolWeight:2229 RetIndex:2229

CompName:Cystamine-d8-nTMS ;

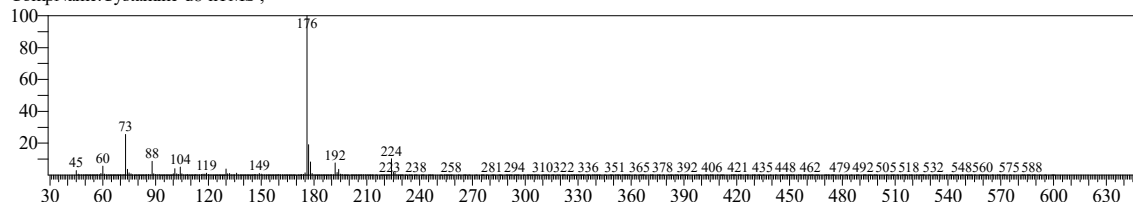

Hit#:3 Entry:358 Library:OA TMS DB5\_67min\_V3.lib

SI:10 Formula:C14H32N2O3Si2 CAS:1946-82-3 MolWeight:332 RetIndex:1894

CompName:N-Acetyl-Lysine-2TMS ; (2S)-2-acetamido-6-aminohexanoic acid

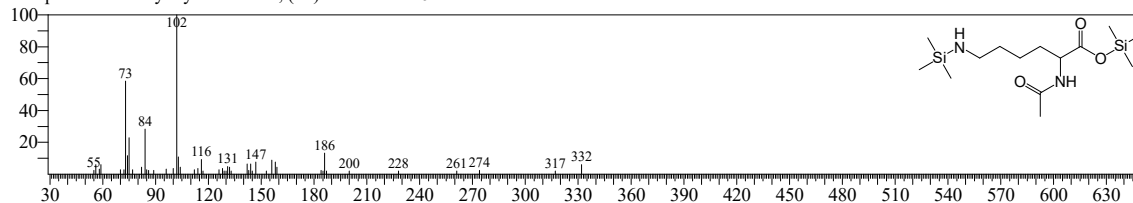

Hit#:4 Entry:41 Library:OA TMS DB5\_67min\_V3.lib

SI:10 Formula:C9H23NO2Si2 CAS:107-95-9 MolWeight:233 RetIndex:1194

CompName:3-Aminopropanoic acid-2TMS ; 3-aminopropanoic acid

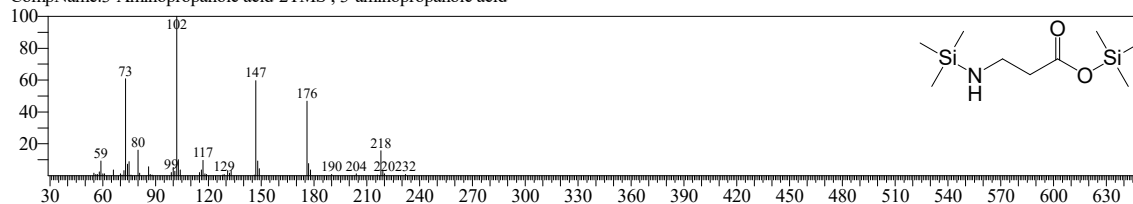

Hit#:5 Entry:356 Library:OA TMS DB5\_67min\_V3.lib

SI:9 Formula:C11H21N5Si2 CAS:73-24-5 MolWeight:279 RetIndex:1887

CompName:Adenine-2TMS ; 7H-purin-6-amine

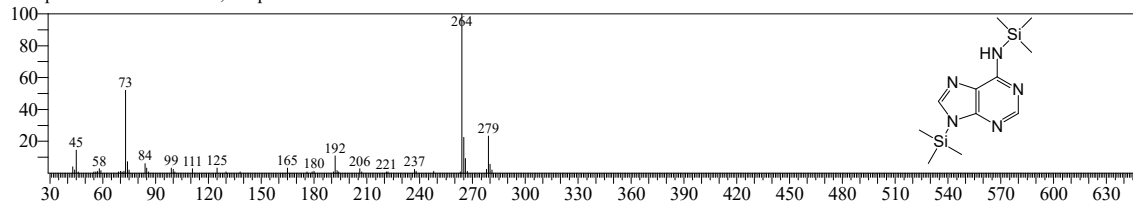

# TNAU

<< Target >>

Line#9 R.Time:30.720(Scan#:5145) MassPeaks:389

RawMode:Averaged 30.715-30.725(5144-5146) BasePeak:305.10(683)

BG Mode:Calc. from Peak Group 1 - Event 1 Q3 Scan

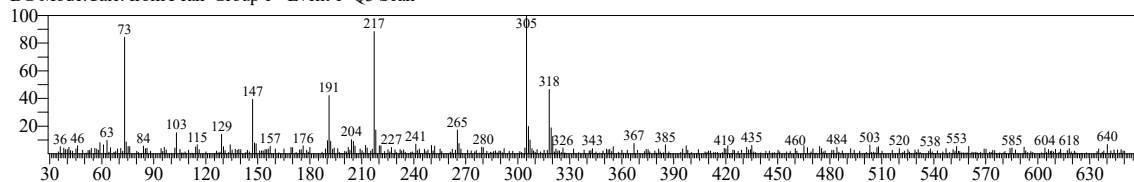

Hit#1 Entry:43552 Library:NIST20R.lib

SI:81 Formula:C<sub>24</sub>H<sub>60</sub>O<sub>6</sub>Si<sub>6</sub> CAS:2582-79-8 MolWeight:612 RetIndex:2194

CompName:Myo-Inositol, 6TMS Inositol, 1,2,3,4,5,6-hexakis-O-(trimethylsilyl)- Inositol, 1,2,3,4,5,6-hexakis-O-(trimethylsilyl)-, myo- Trime

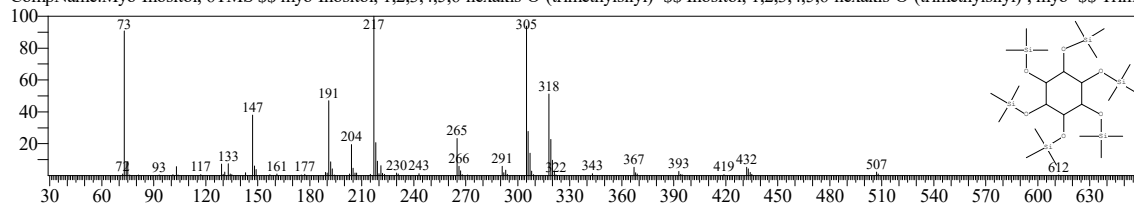

Hit#2 Entry:465 Library:OA TMS DB5 67min V3.lib

SI:79 Formula:C<sub>24</sub>H<sub>60</sub>O<sub>6</sub>Si<sub>6</sub> CAS:87-89-8 MolWeight:612 RetIndex:2132

CompName:Inositol-6TMS(2) ; cyclohexane-1,2,3,4,5,6-hexol

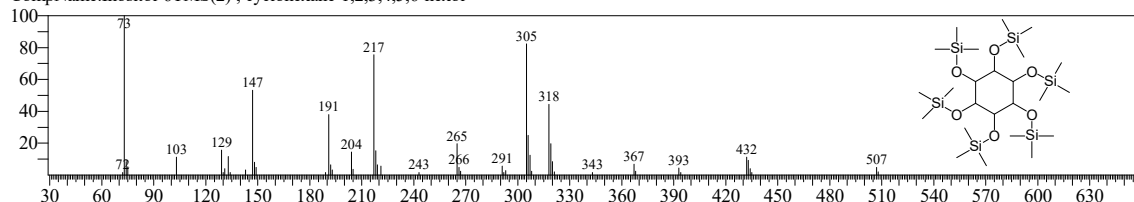

Hit#3 Entry:43144 Library:NIST20M2.lib

SI:74 Formula:C<sub>24</sub>H<sub>60</sub>O<sub>6</sub>Si<sub>6</sub> CAS:14251-18-4 MolWeight:612 RetIndex:2194

CompName:Scyllo-Inositol, 6TMS Inositol, 1,2,3,4,5,6-hexakis-O-(trimethylsilyl)-, scyllo- Trimethyl((2,3,4,5,6-pentakis[(trimethylsilyl)oxy]cyclohex

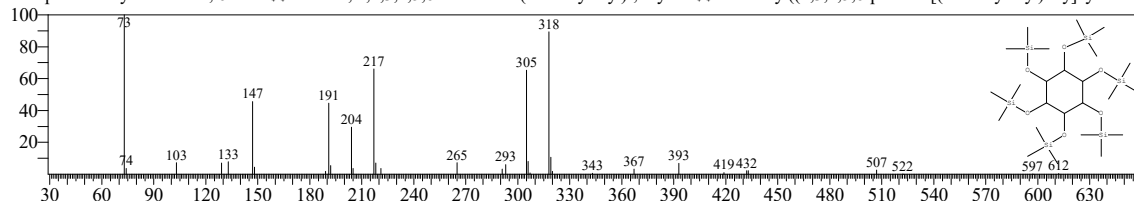

Hit#4 Entry:43146 Library:NIST20M2.lib

SI:74 Formula:C<sub>24</sub>H<sub>60</sub>O<sub>6</sub>Si<sub>6</sub> CAS:29267-01-4 MolWeight:612 RetIndex:2194

CompName:Inositol, epi-, 6TMS Inositol, 1,2,3,4,5,6-hexakis-O-(trimethylsilyl)-, epi- Trimethyl((2,3,4,5,6-pentakis[(trimethylsilyl)oxy]cyclohexyl)ox

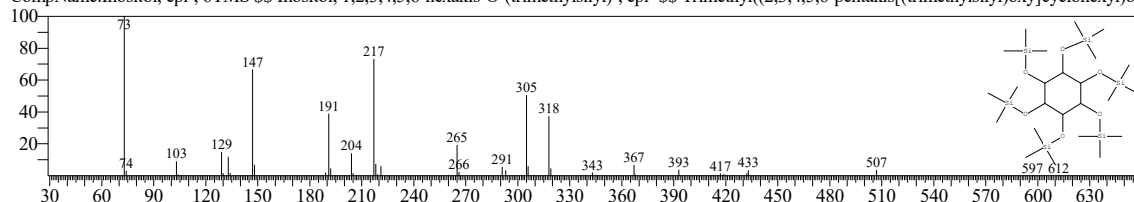

Hit#5 Entry:43145 Library:NIST20M2.lib

SI:70 Formula:C<sub>24</sub>H<sub>60</sub>O<sub>6</sub>Si<sub>6</sub> CAS:29412-26-8 MolWeight:612 RetIndex:2194

CompName:Muco-Inositol, 6TMS Inositol, 1,2,3,4,5,6-hexakis-O-(trimethylsilyl)-, muco- Trimethyl((2,3,4,5,6-pentakis[(trimethylsilyl)oxy]cyclohexy

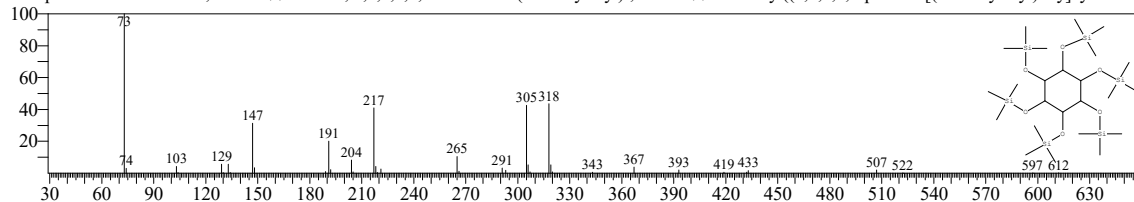

# TNAU

<< Target >>

Line#:10 R.Time:31.470(Scan#:5295) MassPeaks:408

RawMode:Averaged 31.465-31.475(5294-5296) BasePeak:67.10(1997)

BG Mode:Calc. from Peak Group 1 - Event 1 Q3 Scan

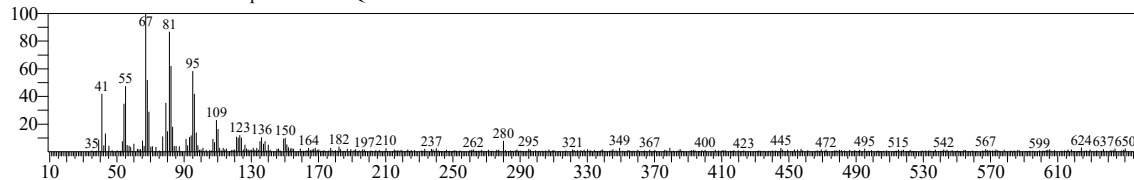

Hit#:1 Entry:139646 Library:NIST20M1.lib

SI:93 Formula:C18H32O2 CAS:2420-56-6 MolWeight:280 RetIndex:2183

CompName:10E,12Z-Octadecadienoic acid

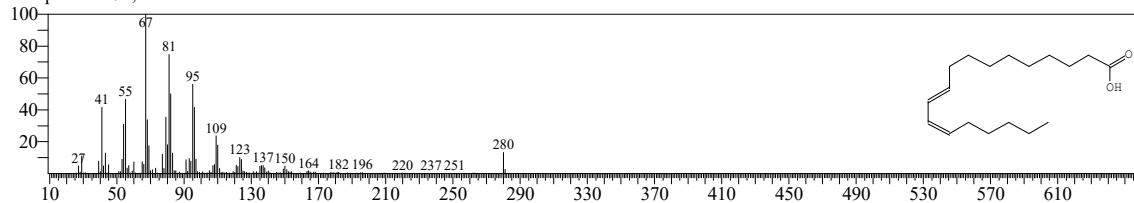

Hit#:2 Entry:139651 Library:NIST20M1.lib

SI:93 Formula:C18H32O2 CAS:544-71-8 MolWeight:280 RetIndex:2183

CompName:(9E,11E)-Octadecadienoic acid

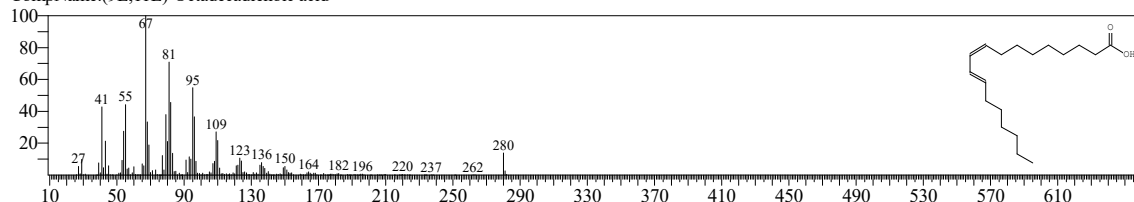

Hit#:3 Entry:34035 Library:NIST20R.lib

SI:93 Formula:C18H32O2 CAS:60-33-3 MolWeight:280 RetIndex:2183

CompName:9,12-Octadecadienoic acid (Z,Z)- \$\$ cis-9,cis-12-Octadecadienoic acid \$\$ cis,cis-Linoleic acid \$\$ Grape seed oil \$\$ Linoleic \$\$ Linoleic acid \$

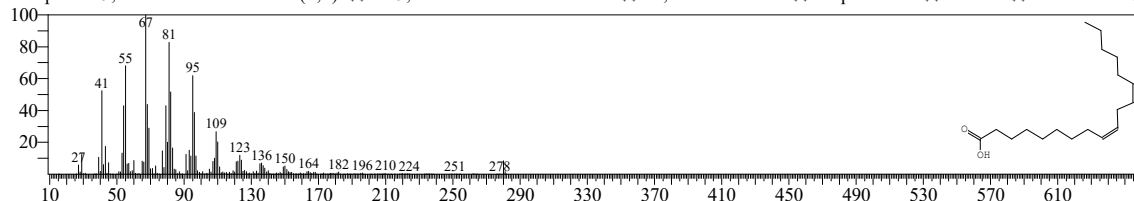

Hit#:4 Entry:139661 Library:NIST20M1.lib

SI:92 Formula:C18H32O2 CAS:506-21-8 MolWeight:280 RetIndex:2183

CompName:Linoelaidic acid

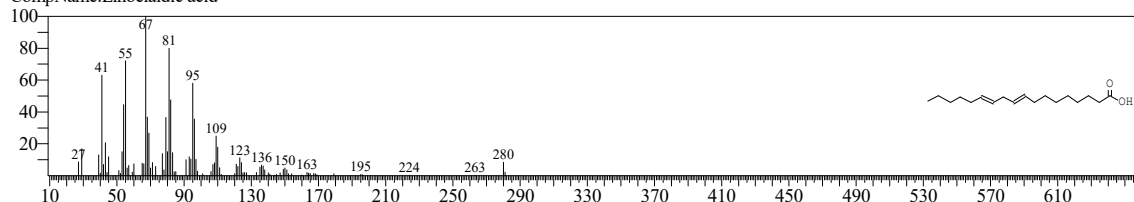

Hit#:5 Entry:173215 Library:NIST20M1.lib

SI:92 Formula:C20H36O2 CAS:2091-39-6 MolWeight:308 RetIndex:2382

CompName:11,14-Eicosadienoic acid

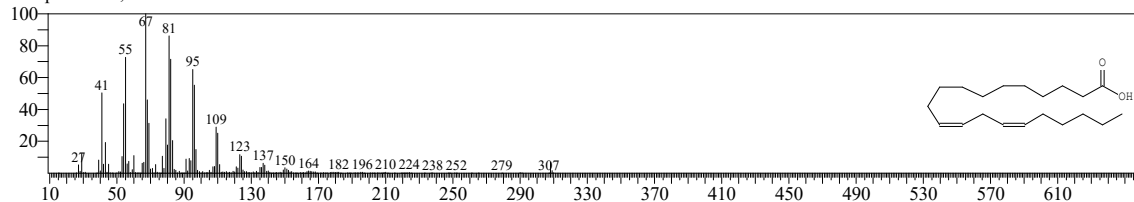

# TNAU

<< Target >>

Line#:11 R.Time:31.570(Scan#:5315) MassPeaks:393

RawMode:Averaged 31.565-31.575(5314-5316) BasePeak:79.10(1264)

BG Mode:Calc. from Peak Group 1 - Event 1 Q3 Scan

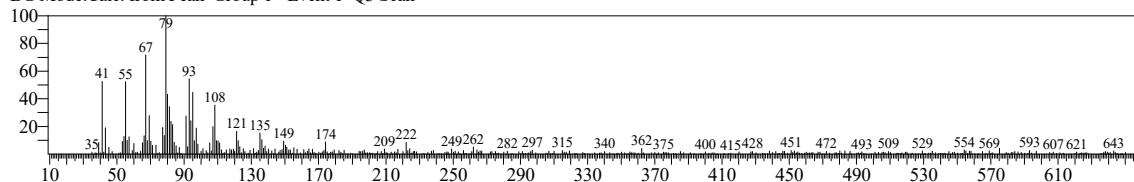

Hit#:1 Entry:137464 Library:NIST20M1.lib

SI:91 Formula:C18H30O2 CAS:463-40-1 MolWeight:278 RetIndex:2191

CompName:9,12,15-Octadecatrienoic acid, (Z,Z,Z)- \$\$ Linolenic acid \$\$ .alpha.-Linolenic acid \$\$ All-cis-9,12,15-Octadecatrienoic acid \$\$ cis,cis,cis-9,12,15-Octadecatrienoic acid

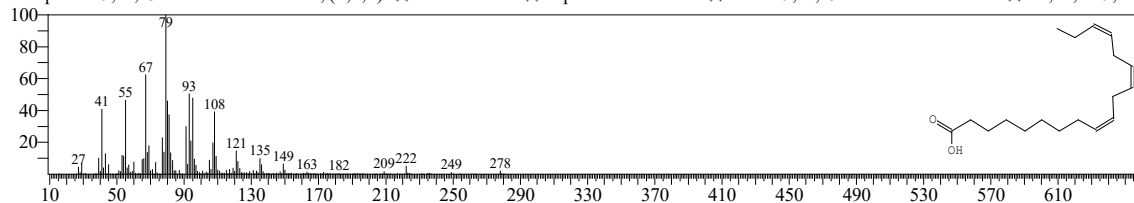

Hit#:2 Entry:121160 Library:NIST20M1.lib

SI:89 Formula:C18H32O CAS:506-44-5 MolWeight:264 RetIndex:2077

CompName:9,12,15-Octadecatrien-1-ol, (Z,Z,Z)- \$\$ (9E,12E,15E)-9,12,15-Octadecatrien-1-ol # \$\$ (Z,Z,Z)-9,12,15-Octadecatrien-1-ol

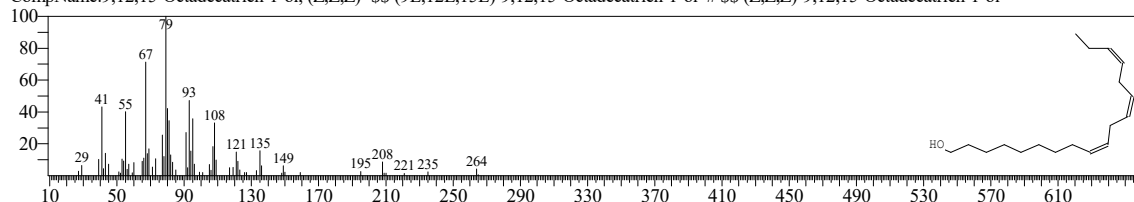

Hit#:3 Entry:171056 Library:NIST20M1.lib

SI:89 Formula:C20H34O2 CAS:17046-59-2 MolWeight:306 RetIndex:2390

CompName:Eicosatrienoic acid, 11(Z),14(Z),17(Z)

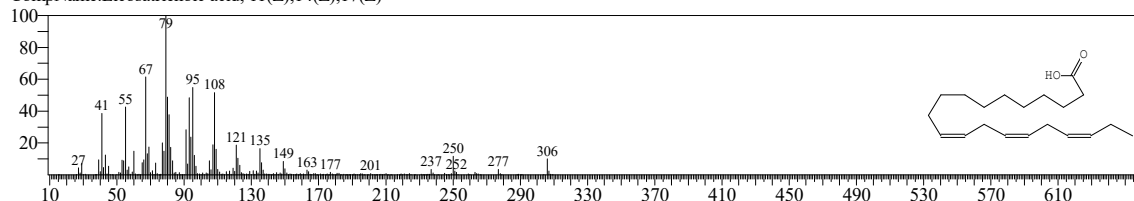

Hit#:4 Entry:35226 Library:NIST20R.lib

SI:88 Formula:C19H32O2 CAS:301-00-8 MolWeight:292 RetIndex:2101

CompName:9,12,15-Octadecatrienoic acid, methyl ester, (Z,Z,Z)- \$\$ Linolenic acid, methyl ester \$\$ Methyl all-cis-9,12,15-octadecatrienoate \$\$ Methyl lino

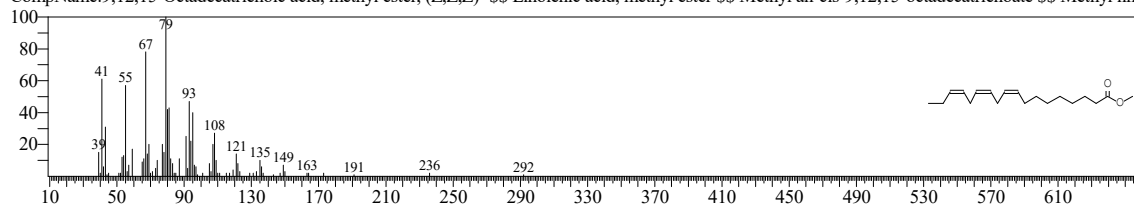

Hit#:5 Entry:87848 Library:NIST20M1.lib

SI:88 Formula:C16H26O CAS:56797-43-4 MolWeight:234 RetIndex:1824

CompName:cis,cis,cis-7,10,13-Hexadecatrienal \$\$ (7Z,10Z,13Z)-7,10,13-Hexadecatrienal #

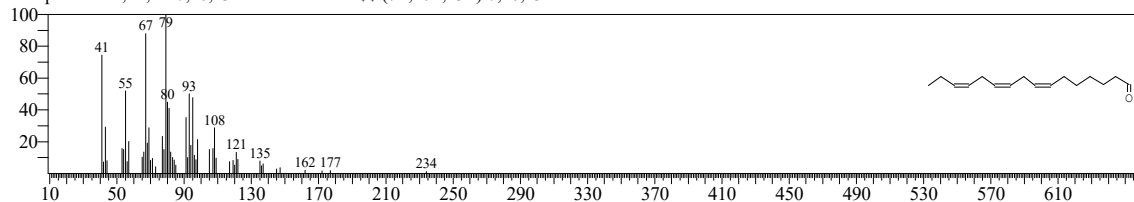

Supplement: Supplementary file 37 [file supplementary]
