# Supplementary material for: Comparative Metabolomics Profiling Reveals Key Metabolites and Associated Pathways Regulating Tuber Dormancy in White Yam (<em>Dioscorea rotundata</em>)
Source: Preprints.org preprint supplement (doi:10.20944/preprints202303.0378.v1), 2023-03-21

# TNAU

## Sample Information

Analyzed by : Admin  
 Analyzed : 01-Sep-22 6:27:26 PM  
 Sample Type : Unknown  
 Level # : 1  
 Sample Name : Sample  
 Sample ID : 1-1  
 IS Amount : [1]=1  
 Sample Amount : 1  
 Dilution Factor : 1  
 Vial # : 2  
 Injection Volume : 2.00  
 Data File : D:\GCMS-8040NX\Sep 2022\Users\01.09.2022\01092022002.qgd  
 Org Data File : D:\GCMS-8040NX\Sep 2022\Users\01.09.2022\01092022002.qgd  
 Method File : D:\GCMS-8040NX\Sep 2022\Method\Scan\_methodfile.qgm  
 Org Method File : D:\GCMS-8040NX\Sep 2022\Method\Scan\_methodfile.qgm  
 Report File :  
 Tuning File : D:\GCMS-8040NX\Aug 2022\Tuning Data\TUNING 25082022.qgt  
 Modified by : Admin  
 Modified : 05-Sep-22 10:54:47 AM

Chromatogram Sample D:\GCMS-8040NX\Sep 2022\Users\01.09.2022\01092022002.qgd

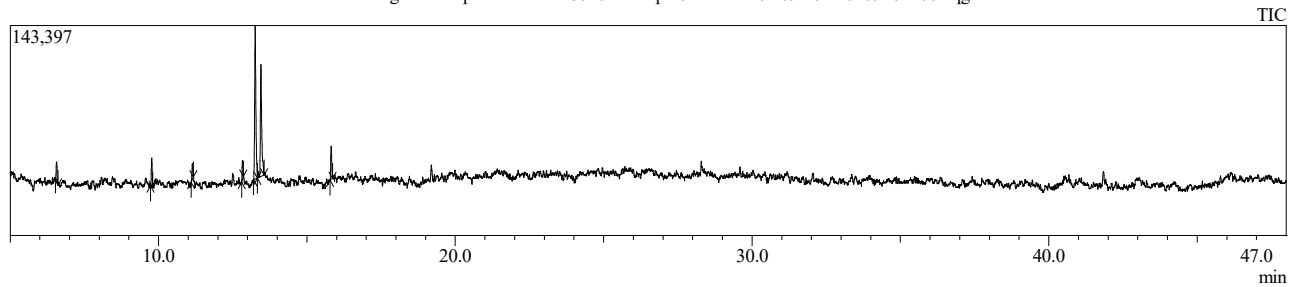

Peak Report TIC

| Peak# | R.Time | Area   | Area%  | Height | Height% | A/H  | Similarity | Name                                         |
|-------|--------|--------|--------|--------|---------|------|------------|----------------------------------------------|
| 1     | 6.561  | 28470  | 3.95   | 12636  | 4.86    | 2.25 | 71         | Methyl 6,6,8,8,10,10-hexamethyl-3-oxo-2,5,7- |
| 2     | 9.772  | 40140  | 5.57   | 19645  | 7.56    | 2.04 | 93         | Pentasiloxane, dodecamethyl-                 |
| 3     | 11.140 | 20202  | 2.80   | 10619  | 4.09    | 1.90 | 62         | Caproic acid-TMS                             |
| 4     | 12.827 | 26541  | 3.68   | 13001  | 5.00    | 2.04 | 40         | Caffeine                                     |
| 5     | 13.256 | 306538 | 42.55  | 104779 | 40.31   | 2.93 | 54         | Methyl cis-13,16-Docosadienate               |
| 6     | 13.448 | 247192 | 34.31  | 76445  | 29.41   | 3.23 | 54         | Methyl cis-13,16-Docosadienate               |
| 7     | 15.819 | 51388  | 7.13   | 22781  | 8.77    | 2.26 | 78         | Malic acid 1-ethyl ester, 2TMS               |
|       |        | 720471 | 100.00 | 259906 | 100.00  |      |            |                                              |

Library

# TNAU

<< Target >>

Line#:1 R.Time:6.560(Scan#:313) MassPeaks:325

RawMode:Averaged 6.555-6.565(312-314) BasePeak:253.10(2935)

BG Mode:Calc. from Peak Group 1 - Event 1 Q3 Scan

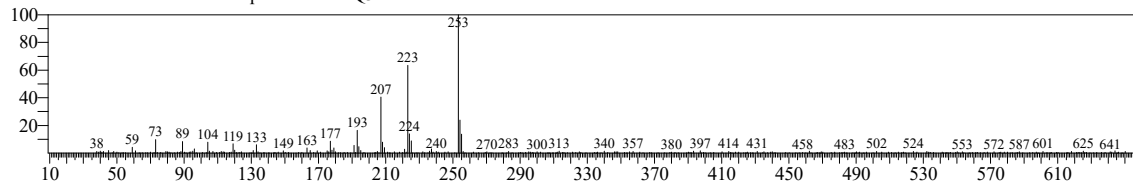

Hit#:1 Entry:249268 Library:NIST20M1.lib

SI:71 Formula:C12H28O8Si3 CAS:0-00-0 MolWeight:384 RetIndex:1582

CompName:Methyl 6,6,8,10,10-hexamethyl-3-oxo-2,5,7,9,11-pentaoxa-6,8,10-trisilatridecan-13-oate

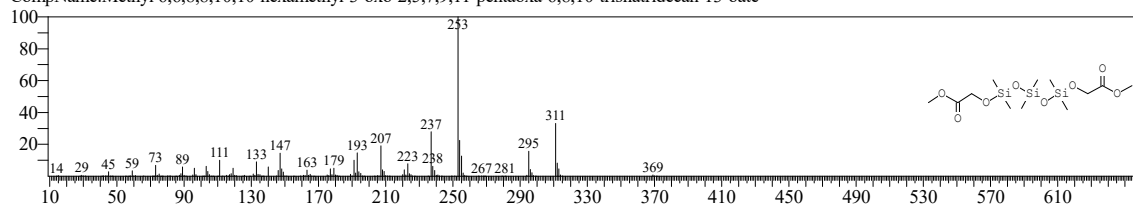

Hit#:2 Entry:368 Library:OA\_TMS\_DB5\_67min\_V3.lib

SI:39 Formula:C17H35NO2Si3 CAS:1196-92-5 MolWeight:369 RetIndex:1899

CompName:Vanillylamine-3TMS ; 4-(aminomethyl)-2-methoxyphenol

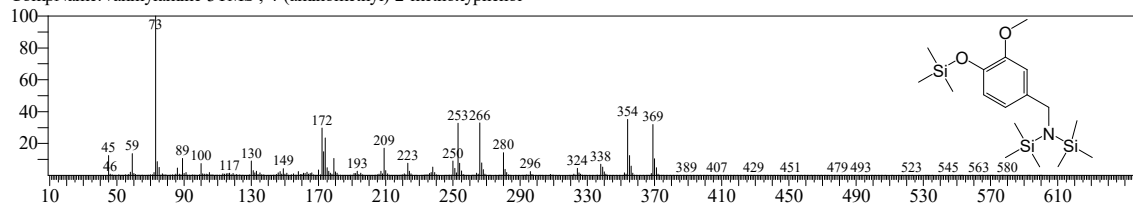

Hit#:3 Entry:184 Library:OA\_TMS\_DB5\_67min\_V3.lib

SI:37 Formula:C14H24O3Si2 CAS:614-75-5 MolWeight:296 RetIndex:1579

CompName:2-Hydroxyphenylacetic acid-2TMS ; 2-(2-hydroxyphenyl)acetic acid

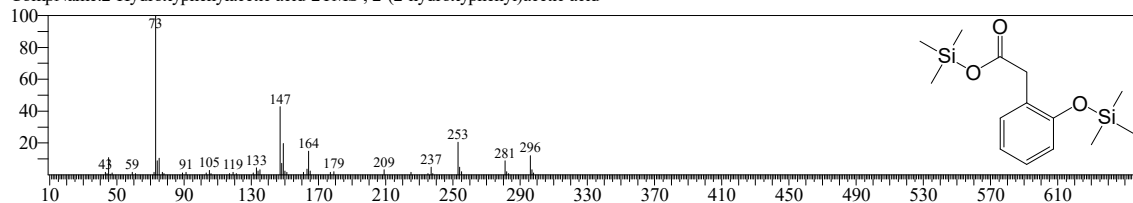

Hit#:4 Entry:138 Library:OA\_TMS\_DB5\_67min\_V3.lib

SI:37 Formula:C14H24O3Si2 CAS:90-64-2 MolWeight:296 RetIndex:1486

CompName:Mandelic acid-2TMS ; 2-hydroxy-2-phenylacetic acid

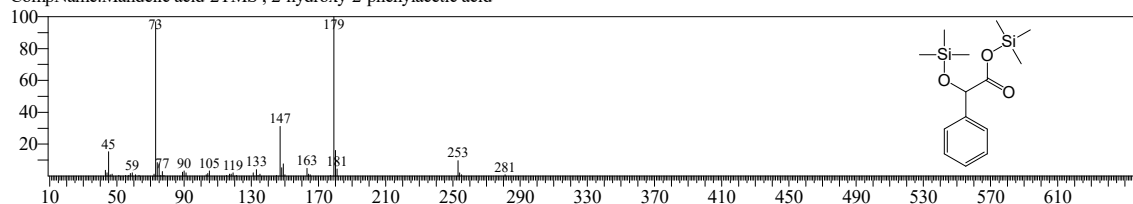

Hit#:5 Entry:315 Library:OA\_TMS\_DB5\_67min\_V3.lib

SI:35 Formula:C16H30O4Si3 CAS:99-50-3 MolWeight:370 RetIndex:1833

CompName:Protocatechuic acid-3TMS ; 3,4-dihydroxybenzoic acid

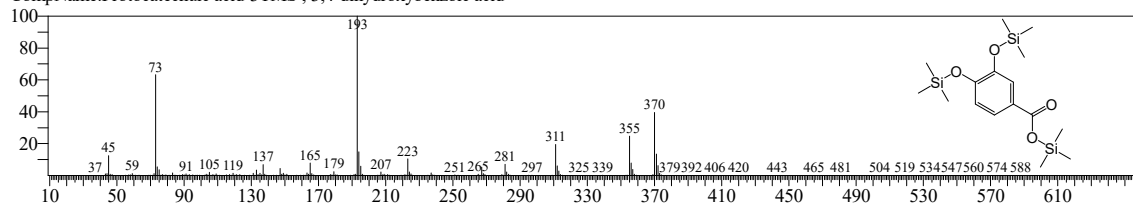

# TNAU

<< Target >>

Line#:2 R.Time:9.770(Scan#:955) MassPeaks:421

RawMode:Averaged 9.765-9.775(954-956) BasePeak:281.05(3705)

BG Mode:Calc. from Peak Group 1 - Event 1 Q3 Scan

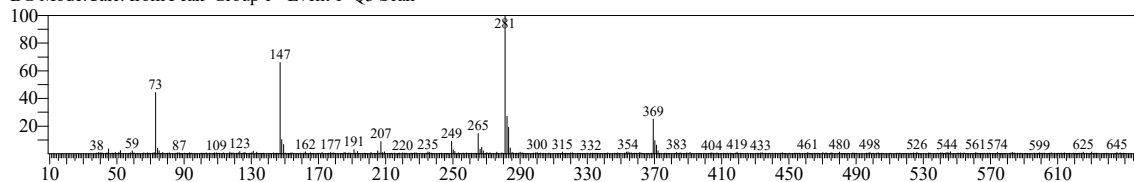

Hit#:1 Entry:40975 Library:NIST20R.lib

SI:93 Formula:C<sub>12</sub>H<sub>36</sub>O<sub>4</sub>Si<sub>5</sub> CAS:141-63-9 MolWeight:384 RetIndex:1068

CompName:Pentasiloxane, dodecamethyl- \$\$ Dodecamethylpentasiloxane #

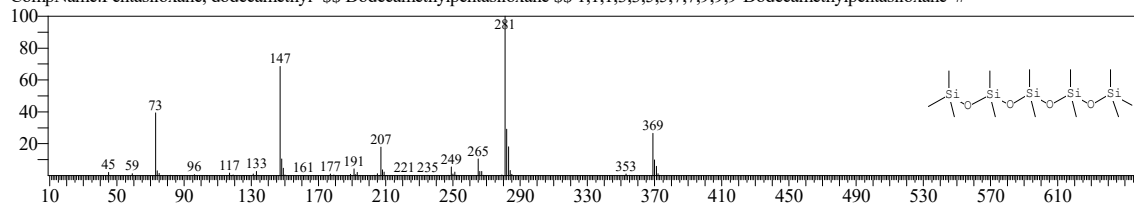

Hit#:2 Entry:249272 Library:NIST20M1.lib

SI:82 Formula:C<sub>12</sub>H<sub>36</sub>O<sub>4</sub>Si<sub>5</sub> CAS:3555-47-3 MolWeight:384 RetIndex:1068

CompName:Trisiloxane, 1,1,1,5,5,5-hexamethyl-3,3-bis[(trimethylsilyl)oxy]- \$\$ Tetrakis(trimethylsiloxy)silane #

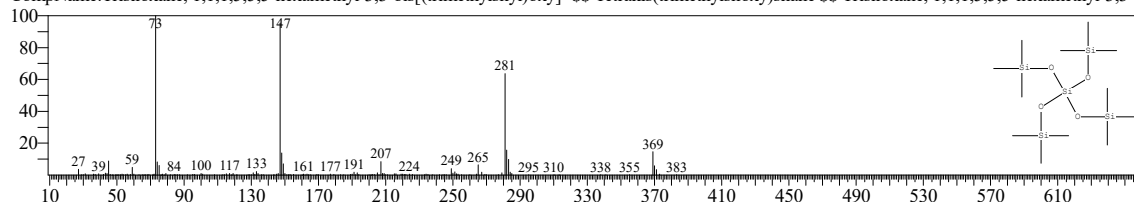

Hit#:3 Entry:27848 Library:NIST20M2.lib

SI:79 Formula:C<sub>18</sub>H<sub>48</sub>O<sub>4</sub>Si<sub>5</sub> CAS:0-00-0 MolWeight:468 RetIndex:1495

CompName:1,3,5,7,9-Pentasiloxane, 1,1,3,3,5,5,7,7,9,9-decamethyl-1,9-di(tert-butyl)-

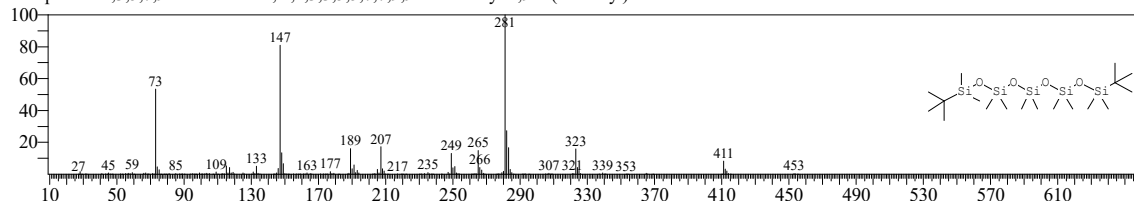

Hit#:4 Entry:249271 Library:NIST20M1.lib

SI:78 Formula:C<sub>12</sub>H<sub>36</sub>O<sub>4</sub>Si<sub>5</sub> CAS:38146-99-5 MolWeight:384 RetIndex:1068

CompName:1,1,1,3,5,5,7,7-Nonamethyl-3-(trimethylsiloxy)tetrasiloxane #

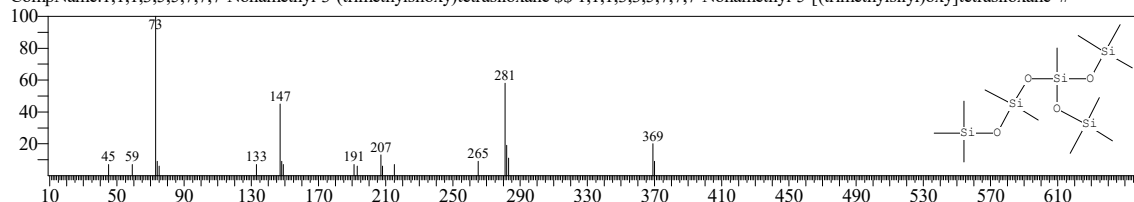

Hit#:5 Entry:158097 Library:NIST20M1.lib

SI:74 Formula:C<sub>14</sub>H<sub>24</sub>O<sub>3</sub>Si<sub>2</sub> CAS:0-00-0 MolWeight:296 RetIndex:1625

CompName:2,6-Dihydroxyacetophenone, 2TMS derivative \$\$ 2',6'-Dihydroxyacetophenone, bis(trimethylsilyl) ether

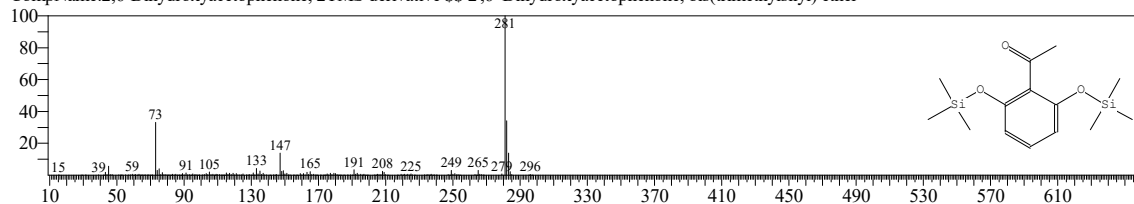

# TNAU

<< Target >>

Line#:3 R.Time:11.140(Scan#:1229) MassPeaks:328

RawMode:Averaged 11.135-11.145(1228-1230) BasePeak:75.05(1329)

BG Mode:Calc. from Peak Group 1 - Event 1 Q3 Scan

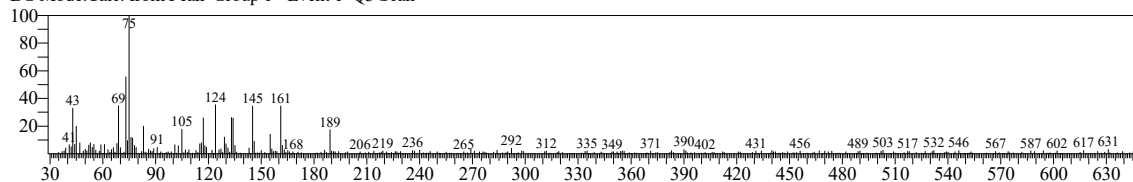

Hit#:1 Entry:11 Library:OA\_TMS\_DB5\_67min\_V3.lib

SI:62 Formula:C<sub>9</sub>H<sub>20</sub>O<sub>2</sub>Si CAS:142-62-1 MolWeight:188 RetIndex:1071

CompName:Caproic acid-TMS ; hexanoic acid

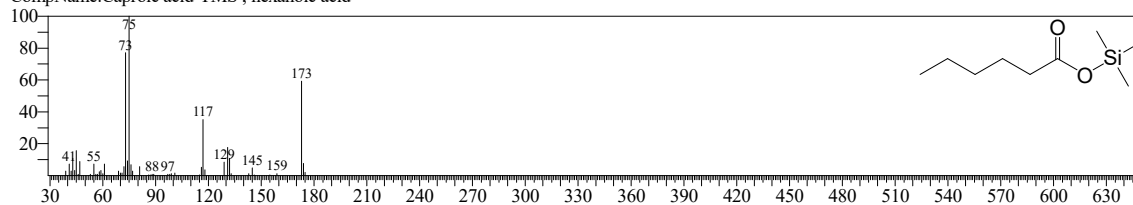

Hit#:2 Entry:70 Library:OA\_TMS\_DB5\_67min\_V3.lib

SI:61 Formula:C<sub>11</sub>H<sub>24</sub>O<sub>2</sub>Si CAS:124-07-2 MolWeight:216 RetIndex:1263

CompName:Octanoic acid-TMS ; octanoic acid

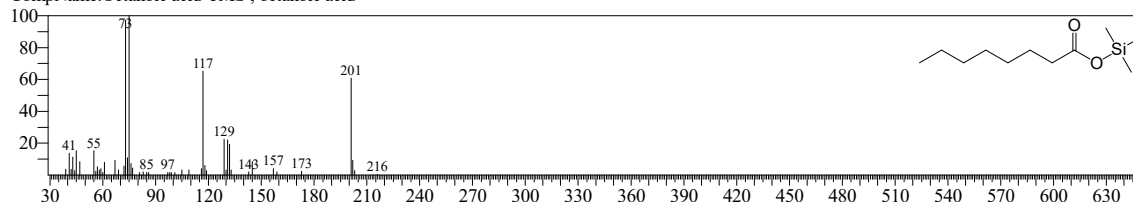

Hit#:3 Entry:129 Library:OA\_TMS\_DB5\_67min\_V3.lib

SI:61 Formula:C<sub>13</sub>H<sub>28</sub>O<sub>2</sub>Si CAS:334-48-5 MolWeight:244 RetIndex:1457

CompName:Decanoic acid-TMS ; decanoic acid

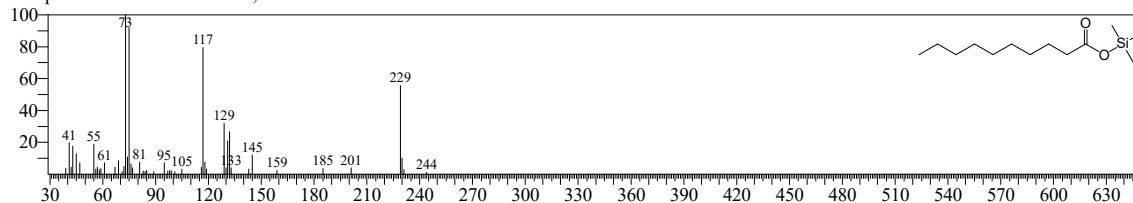

Hit#:4 Entry:106 Library:OA\_TMS\_DB5\_67min\_V3.lib

SI:60 Formula:C<sub>9</sub>H<sub>18</sub>O<sub>3</sub>Si CAS:503-48-0 MolWeight:202 RetIndex:1378

CompName:Mevalonic lactone-TMS ; 4-hydroxy-4-methyloxan-2-one

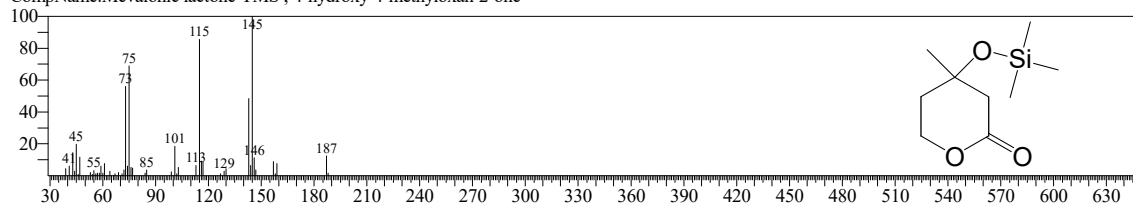

Hit#:5 Entry:331 Library:OA\_TMS\_DB5\_67min\_V3.lib

SI:60 Formula:C<sub>17</sub>H<sub>36</sub>O<sub>2</sub>Si CAS:544-63-8 MolWeight:300 RetIndex:1850

CompName:Myristic acid-TMS ; tetradecanoic acid

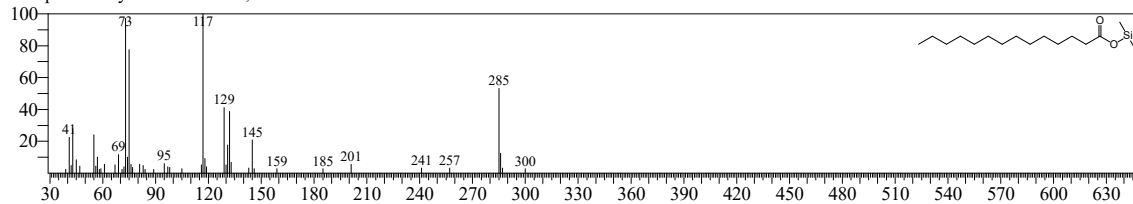

# TNAU

<< Target >>

Line#:4 R.Time:12.825(Scan#:1566) MassPeaks:339

RawMode:Averaged 12.820-12.830(1565-1567) BasePeak:138.05(4188)

BG Mode:Calc. from Peak Group 1 - Event 1 Q3 Scan

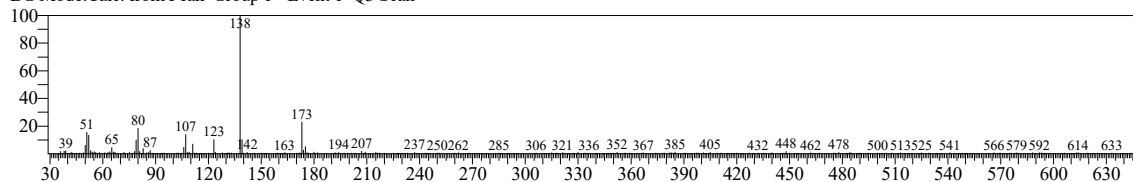

Hit#:1 Entry:342 Library:OA\_TMS\_DB5\_67min\_V3.lib

SI:40 Formula:C<sub>8</sub>H<sub>10</sub>N<sub>4</sub>O<sub>2</sub> CAS:58-08-2 MolWeight:194 RetIndex:1867

CompName:Caffeine ; 1,3,7-trimethylpurine-2,6-dione

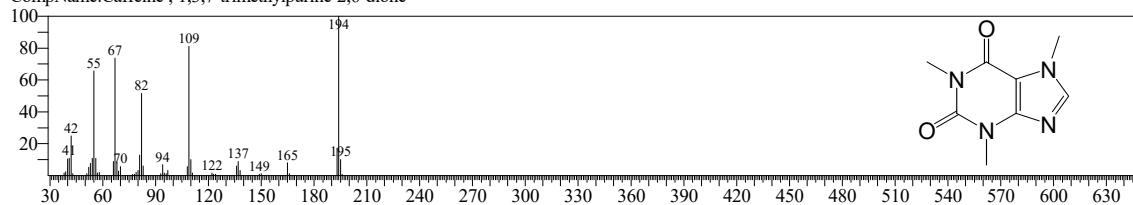

Hit#:2 Entry:84 Library:OA\_TMS\_DB5\_67min\_V3.lib

SI:39 Formula:C<sub>9</sub>H<sub>13</sub>NO<sub>2</sub>Si CAS:59-67-6 MolWeight:195 RetIndex:1300

CompName:Nicotinic acid-TMS ; pyridine-3-carboxylic acid

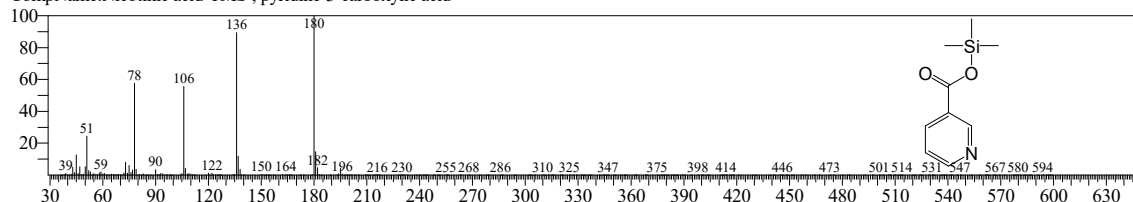

Hit#:3 Entry:137 Library:OA\_TMS\_DB5\_67min\_V3.lib

SI:32 Formula:C<sub>9</sub>H<sub>14</sub>N<sub>2</sub>O<sub>2</sub>Si CAS:98-92-0 MolWeight:194 RetIndex:1486

CompName:Niacinamide-TMS ; pyridine-3-carboxamide

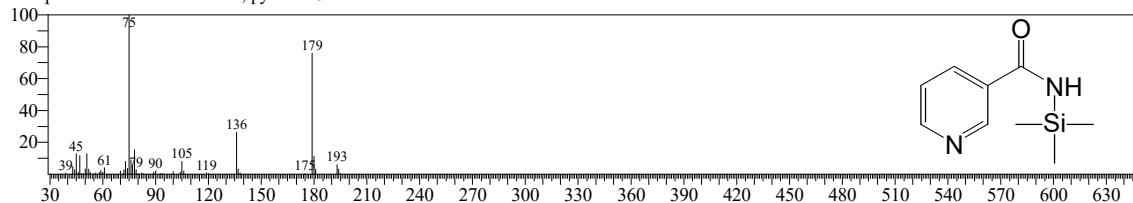

Hit#:4 Entry:34 Library:FA\_ME\_SP2560\_EI\_V3.lib

SI:31 Formula:C<sub>23</sub>H<sub>42</sub>O<sub>2</sub> CAS:7370-49-2 MolWeight:350 RetIndex:3169

CompName:Methyl cis-13,16-Docosadienate ; (13Z,16E)-docosa-13,16-dienoic acid

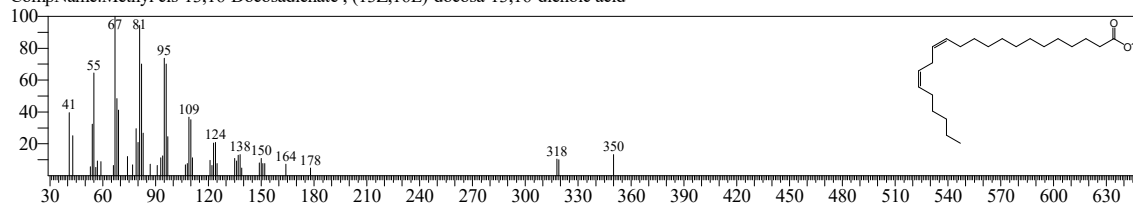

Hit#:5 Entry:21 Library:FA\_ME\_SP2560\_EI\_V3.lib

SI:30 Formula:C<sub>19</sub>H<sub>34</sub>O<sub>2</sub> CAS:60-33-3 MolWeight:294 RetIndex:2775

CompName:Methyl linoleate ; Octadeca-9,12-dienoic acid

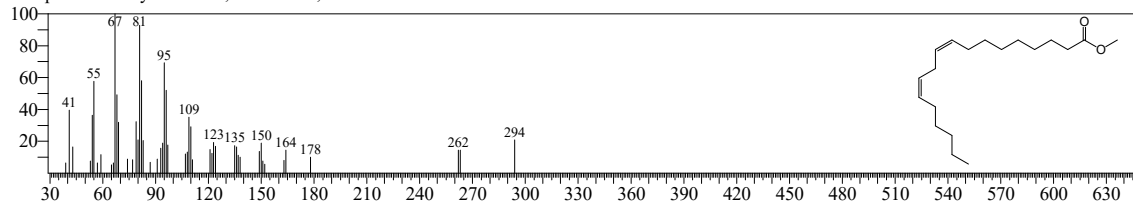

# TNAU

<< Target >>

Line#:5 R.Time:13.255(Scan#:1652) MassPeaks:310

RawMode:Averaged 13.250-13.260(1651-1653) BasePeak:155.10(16094)

BG Mode:Calc. from Peak Group 1 - Event 1 Q3 Scan

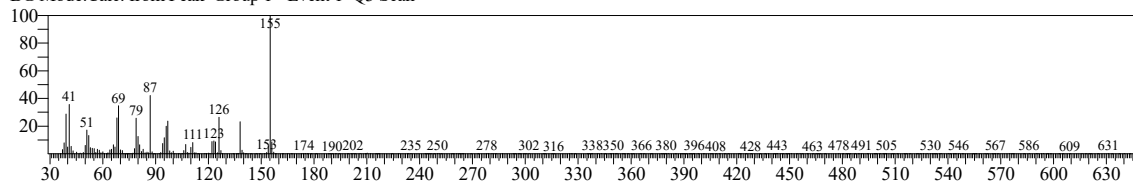

Hit#:1 Entry:34 Library:FA\_ME\_SP2560\_EI\_V3.lib

SI:54 Formula:C23H42O2 CAS:7370-49-2 MolWeight:350 RetIndex:3169

CompName:Methyl cis-13,16-Docosadienate ; (13Z,16E)-docosa-13,16-dienoic acid

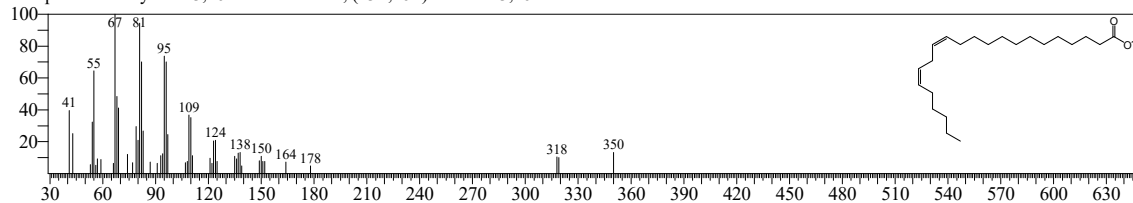

Hit#:2 Entry:21 Library:FA\_ME\_SP2560\_EI\_V3.lib

SI:53 Formula:C19H34O2 CAS:60-33-3 MolWeight:294 RetIndex:2775

CompName:Methyl linoleate ; Octadeca-9,12-dienoic acid

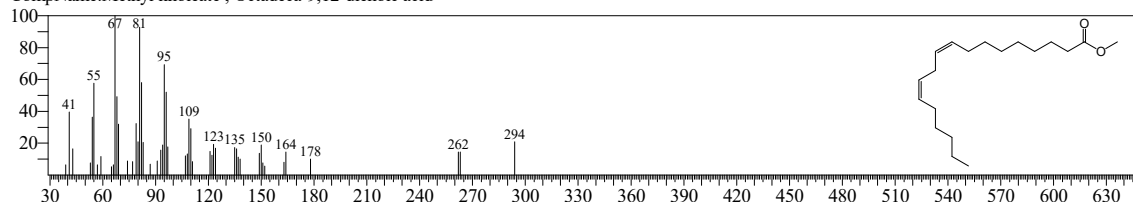

Hit#:3 Entry:20 Library:FA\_ME\_SP2560\_EI\_V3.lib

SI:52 Formula:C19H34O2 CAS:506-21-8 MolWeight:294 RetIndex:2727

CompName:Methyl linolelaidate ; (9E,12E)-octadeca-9,12-dienoic acid

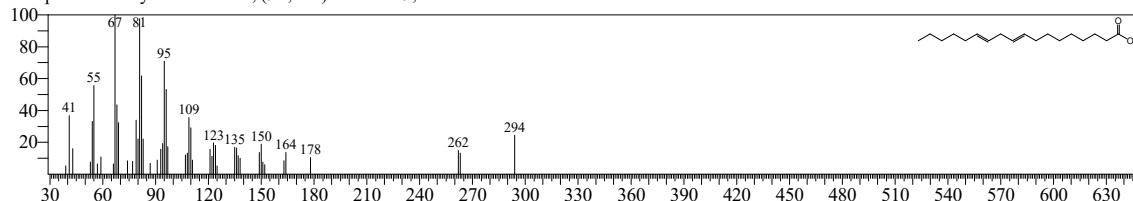

Hit#:4 Entry:27 Library:FA\_ME\_SP2560\_EI\_V3.lib

SI:52 Formula:C21H38O2 CAS:2091-39-6 MolWeight:322 RetIndex:2973

CompName:Methyl cis-11,14-Icosadienoate ; Icosa-11,14-dienoic acid

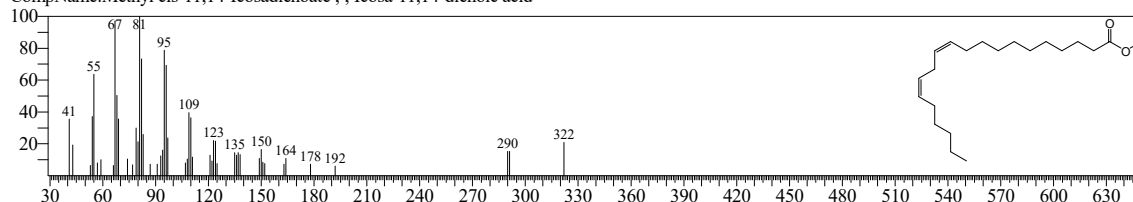

Hit#:5 Entry:11 Library:FA\_ME\_SP2560\_EI\_V3.lib

SI:52 Formula:C16H30O2 CAS:84743-29-3 MolWeight:254 RetIndex:2388

CompName:Methyl cis-10-pentadecenoate ; (Z)-pentadec-10-enoic acid

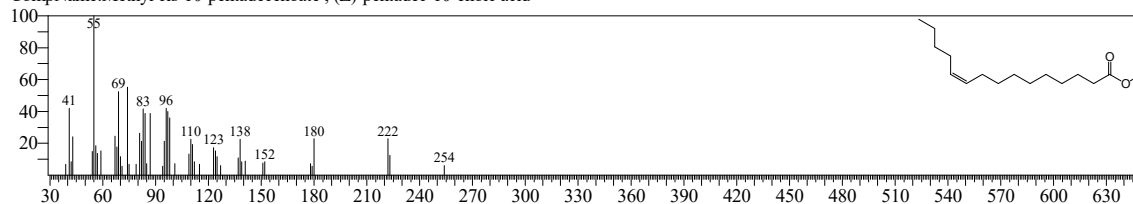

# TNAU

<< Target >>

Line#6 R.Time:13.450(Scan#:1691) MassPeaks:337

RawMode:Averaged 13.445-13.455(1690-1692) BasePeak:155.10(12162)

BG Mode:Calc. from Peak Group 1 - Event 1 Q3 Scan

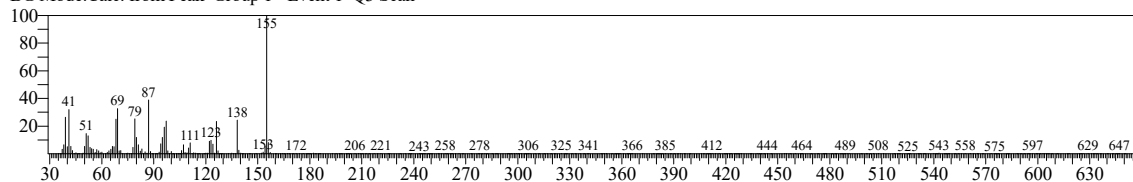

Hit#:1 Entry:34 Library:FA\_ME\_SP2560\_EI\_V3.lib

SI:54 Formula:C23H42O2 CAS:7370-49-2 MolWeight:350 RetIndex:3169

CompName:Methyl cis-13,16-Docosadienate ; (13Z,16E)-docosa-13,16-dienoic acid

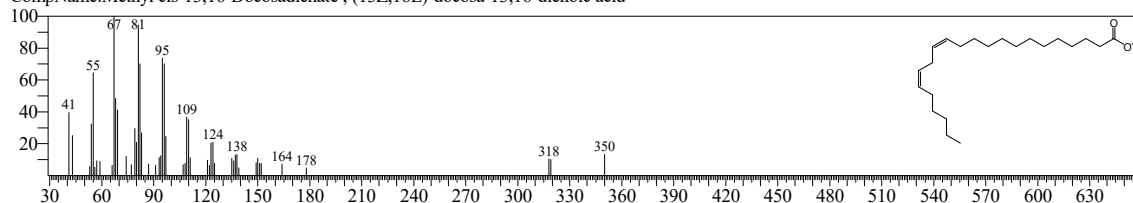

Hit#:2 Entry:21 Library:FA\_ME\_SP2560\_EI\_V3.lib

SI:52 Formula:C19H34O2 CAS:60-33-3 MolWeight:294 RetIndex:2775

CompName:Methyl linoleate ; Octadeca-9,12-dienoic acid

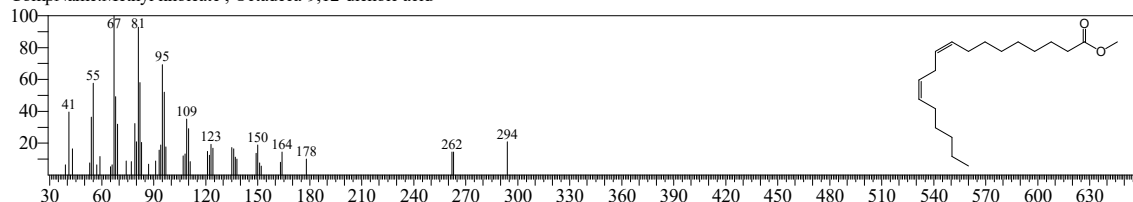

Hit#:3 Entry:20 Library:FA\_ME\_SP2560\_EI\_V3.lib

SI:52 Formula:C19H34O2 CAS:506-21-8 MolWeight:294 RetIndex:2727

CompName:Methyl linolelaidate ; (9E,12E)-octadeca-9,12-dienoic acid

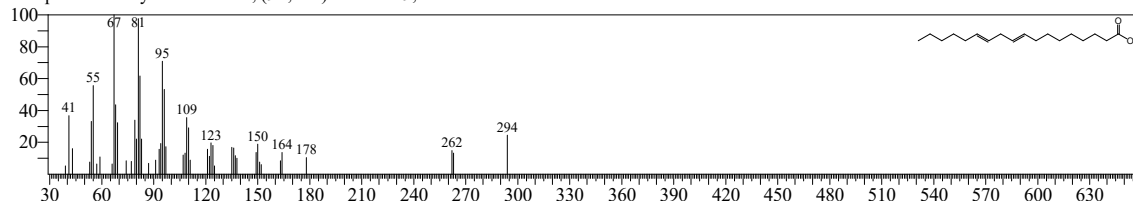

Hit#:4 Entry:27 Library:FA\_ME\_SP2560\_EI\_V3.lib

SI:52 Formula:C21H38O2 CAS:2091-39-6 MolWeight:322 RetIndex:2973

CompName:Methyl cis-11,14-Icosadienoate ; Icosa-11,14-dienoic acid

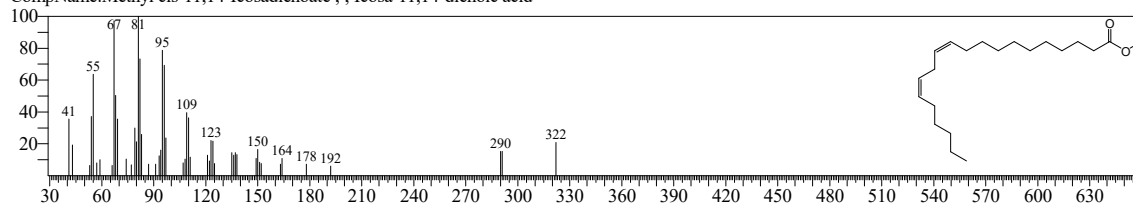

Hit#:5 Entry:11 Library:FA\_ME\_SP2560\_EI\_V3.lib

SI:51 Formula:C16H30O2 CAS:84743-29-3 MolWeight:254 RetIndex:2388

CompName:Methyl cis-10-pentadecenoate ; (Z)-pentadec-10-enoic acid

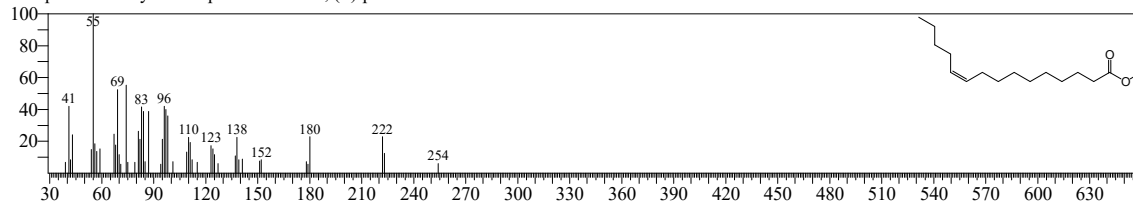

# TNAU

<< Target >>

Line#:7 R.Time:15.820(Scan#:2165) MassPeaks:333

RawMode:Averaged 15.815-15.825(2164-2166) BasePeak:147.05(2886)

BG Mode:Calc. from Peak Group 1 - Event 1 Q3 Scan

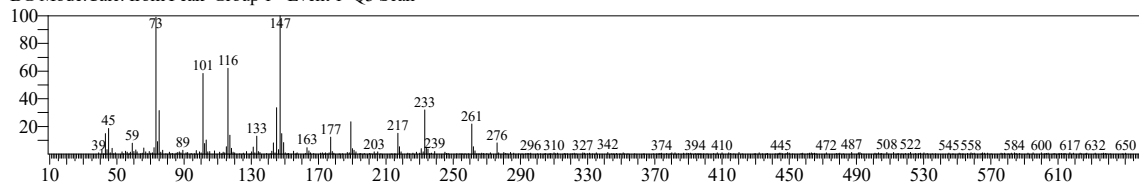

Hit#:1 Entry:169946 Library:NIST20M1.lib

SI:78 Formula:C<sub>12</sub>H<sub>26</sub>O<sub>5</sub>Si<sub>2</sub> CAS:0-00-0 MolWeight:306 RetIndex:1380

CompName:Malic acid 1-ethyl ester, 2TMS \$\$ 1-Ethyl 4-(trimethylsilyl) 2-((trimethylsilyl)oxy)succinate \$\$ (+/-)-1-Ethyl hydroxybutanedioate, 2TMS \$\$ 1

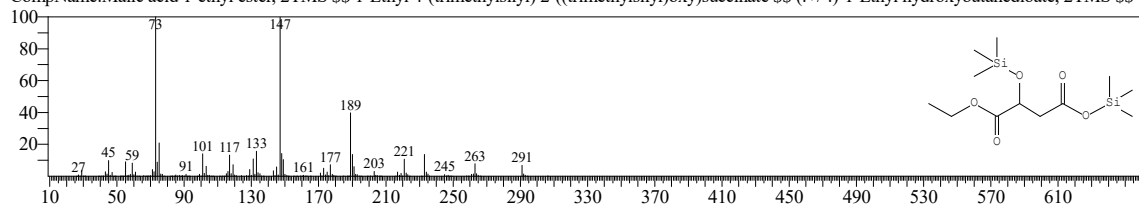

Hit#:2 Entry:219752 Library:NIST20M1.lib

SI:76 Formula:C<sub>14</sub>H<sub>34</sub>O<sub>4</sub>Si<sub>3</sub> CAS:33648-76-9 MolWeight:350 RetIndex:1431

CompName:D-2-Deoxyribose, 3TMS derivative \$\$ 2-Deoxy ribose O,O',O''-tris(trimethylsilyl)- \$\$ 2-Deoxy-3,4,5-tris-O-(trimethylsilyl)pentose #

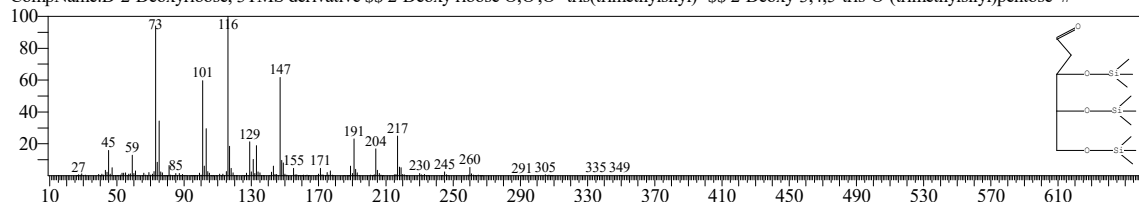

Hit#:3 Entry:219755 Library:NIST20M1.lib

SI:75 Formula:C<sub>14</sub>H<sub>34</sub>O<sub>4</sub>Si<sub>3</sub> CAS:0-00-0 MolWeight:350 RetIndex:1446

CompName:Deoxyribopyranose, tris(trimethylsilyl) ether (isomer 2)

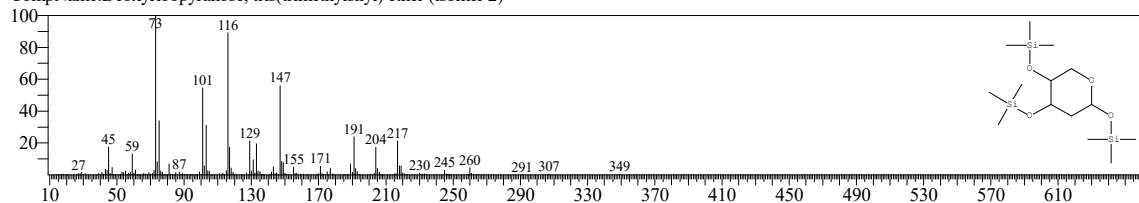

Hit#:4 Entry:219754 Library:NIST20M1.lib

SI:75 Formula:C<sub>14</sub>H<sub>34</sub>O<sub>4</sub>Si<sub>3</sub> CAS:0-00-0 MolWeight:350 RetIndex:1446

CompName:Deoxyribopyranose, tris(trimethylsilyl) ether (isomer 1)

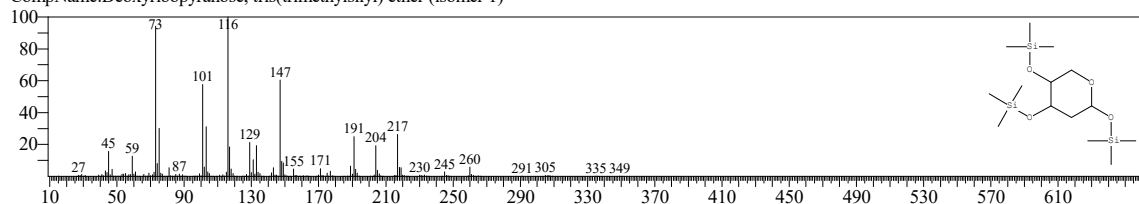

Hit#:5 Entry:33630 Library:NIST20R.lib

SI:74 Formula:C<sub>12</sub>H<sub>28</sub>O<sub>3</sub>Si<sub>2</sub> CAS:136788-82-4 MolWeight:276 RetIndex:1213

CompName:Hexanoic acid, 3-trimethylsilyloxy, trimethylsilyl ester \$\$ Trimethylsilyl 3-[(trimethylsilyl)oxy]hexanoate \$\$ 3-Trimethylsilyloxy(trimethylsilyl)ca

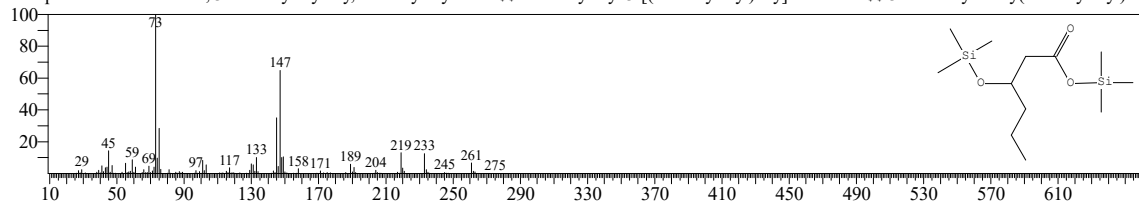

Supplement: Supplementary file 38 [file supplementary]
