# Supplementary material for: Comparative Metabolomics Profiling Reveals Key Metabolites and Associated Pathways Regulating Tuber Dormancy in White Yam (<em>Dioscorea rotundata</em>)
Source: Preprints.org preprint supplement (doi:10.20944/preprints202303.0378.v1), 2023-03-21

# TNAU

## Sample Information

Analyzed by : Admin  
 Analyzed : 05-Aug-22 12:23:28 PM  
 Sample Type : Unknown  
 Level # : 1  
 Sample Name : T101-1  
 Sample ID : T101-1  
 IS Amount : [1]=1  
 Sample Amount : 1  
 Dilution Factor : 1  
 Vial # : 30  
 Injection Volume : 1.00  
 Data File : D:\GCMS-8040NX\Aug 2022\Users\04.08.2022\Data files\04082022-031.qgd  
 Org Data File : D:\GCMS-8040NX\Aug 2022\Users\04.08.2022\Data files\04082022-031.qgd  
 Method File : D:\GCMS-8040NX\Aug 2022\Users\04.08.2022\Method file\27072022\_methodfile.qgm  
 Org Method File : D:\GCMS-8040NX\Aug 2022\Users\04.08.2022\Method file\27072022\_methodfile.qgm  
 Report File :  
 Tuning File : D:\GCMS-8040NX\Aug 2022\Tuning Data\TUNING 04082022.qgt  
 [Comment]  
 Jerry samples  
 Modified by : Admin  
 Modified : 05-Aug-22 4:47:01 PM

Chromatogram T101-1 D:\GCMS-8040NX\Aug 2022\Users\04.08.2022\Data files\04082022-031.qgd

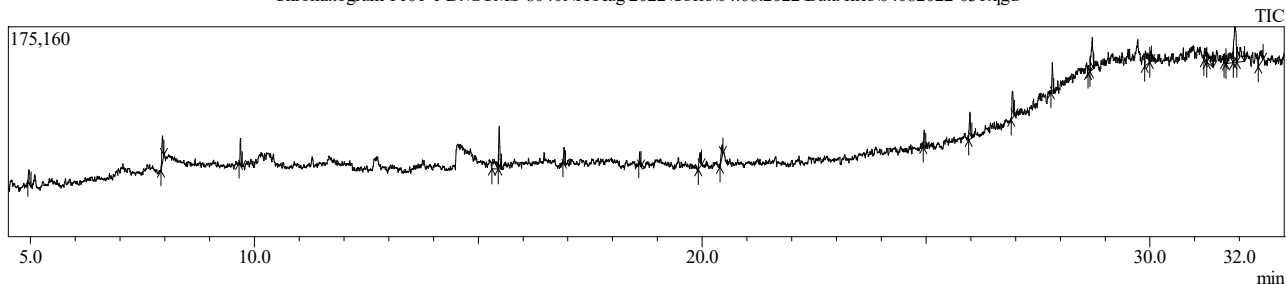

Peak Report TIC

| Peak# | R.Time | Area   | Area% | Height | Height% | A/H  | Similarity | Name                                        |
|-------|--------|--------|-------|--------|---------|------|------------|---------------------------------------------|
| 1     | 4.962  | 21033  | 2.29  | 10864  | 2.95    | 1.94 | 58         | Methyl butanoate                            |
| 2     | 7.945  | 41917  | 4.56  | 22425  | 6.09    | 1.87 | 89         | Undecane                                    |
| 3     | 9.687  | 31894  | 3.47  | 21692  | 5.89    | 1.47 | 89         | Undecane                                    |
| 4     | 15.315 | 43247  | 4.71  | 7800   | 2.12    | 5.54 | 32         | Methyl cis-10-heptadecenoate                |
| 5     | 15.467 | 59268  | 6.45  | 35279  | 9.58    | 1.68 | 89         | 2,4-Di-tert-butylphenol                     |
| 6     | 16.915 | 20369  | 2.22  | 13237  | 3.59    | 1.54 | 78         | Cyclooctasiloxane, hexadecamethyl-          |
| 7     | 18.606 | 11425  | 1.24  | 10340  | 2.81    | 1.10 | 50         | 3,4-Dihydroxymandelic acid-4TMS             |
| 8     | 19.947 | 27711  | 3.01  | 12182  | 3.31    | 2.27 | 61         | Dimethylglycine-TMS                         |
| 9     | 20.445 | 24101  | 2.62  | 9846   | 2.67    | 2.45 | 45         | Batyl alcohol-2TMS                          |
| 10    | 24.957 | 23426  | 2.55  | 14542  | 3.95    | 1.61 | 54         | 3,4-Dihydroxymandelic acid-4TMS             |
| 11    | 25.980 | 42196  | 4.59  | 22428  | 6.09    | 1.88 | 78         | Tetracosamethyl-cyclododecasiloxane         |
| 12    | 26.930 | 46348  | 5.04  | 22127  | 6.01    | 2.09 | 76         | Cyclodecasiloxane, eicosamethyl-            |
| 13    | 27.821 | 35483  | 3.86  | 25432  | 6.90    | 1.40 | 75         | Cyclodecasiloxane, eicosamethyl-            |
| 14    | 28.625 | 7942   | 0.86  | 6010   | 1.63    | 1.32 | 33         | Epinephrine-3TMS                            |
| 15    | 28.712 | 73005  | 7.94  | 26584  | 7.22    | 2.75 | 73         | Tetracosamethyl-cyclododecasiloxane         |
| 16    | 29.900 | 42450  | 4.62  | 12085  | 3.28    | 3.51 | 30         | 3-Hydroxybenzoic acid-2TMS                  |
| 17    | 30.014 | 11114  | 1.21  | 8901   | 2.42    | 1.25 | 38         | 3-(3-Hydroxyphenyl)-3-hydroxypropionic acid |
| 18    | 31.222 | 27956  | 3.04  | 10567  | 2.87    | 2.65 | 29         | Tyrosine-3TMS                               |
| 19    | 31.395 | 49660  | 5.40  | 11810  | 3.21    | 4.20 | 41         | 4-Aminobenzoic acid-2TMS                    |
| 20    | 31.670 | 9001   | 0.98  | 7530   | 2.04    | 1.20 | 36         | 2-Hydroxyisobutyric acid-2TMS               |
| 21    | 31.745 | 52137  | 5.67  | 6330   | 1.72    | 8.24 | 33         | Glycerol-3TMS                               |
| 22    | 31.893 | 103136 | 11.22 | 29626  | 8.04    | 3.48 | 34         | Docosapentaenoic acid-TMS                   |

# TNAU

| Peak# | R.Time | Area   | Area%  | Height | Height% | A/H  | Similarity | Name                            |
|-------|--------|--------|--------|--------|---------|------|------------|---------------------------------|
| 23    | 32.015 | 72292  | 7.87   | 11858  | 3.22    | 6.10 | 37         | 3,4-Dihydroxymandelic acid-4TMS |
| 24    | 32.503 | 42020  | 4.57   | 8877   | 2.41    | 4.73 | 35         | Pyridoxine-3TMS                 |
|       |        | 919131 | 100.00 | 368372 | 100.00  |      |            |                                 |

## Library

<< Target >>

Line#:1 R.Time:4.960(Scan#:93) MassPeaks:296

RawMode:Averaged 4.955-4.965(92-94) BasePeak:89.00(1797)

BG Mode:Calc. from Peak Group 1 - Event 1 Q3 Scan

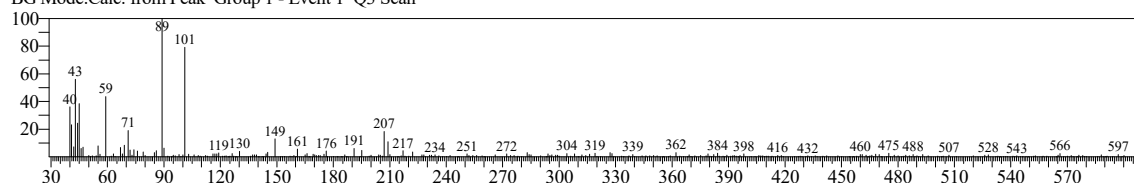

Hit#:1 Entry:1 Library:FA\_ME\_SP2560\_EI\_V3.lib

SI:58 Formula:C5H10O2 CAS:107-92-6 MolWeight:102 RetIndex:1113

CompName:Methyl butanoate ; Butanoic acid

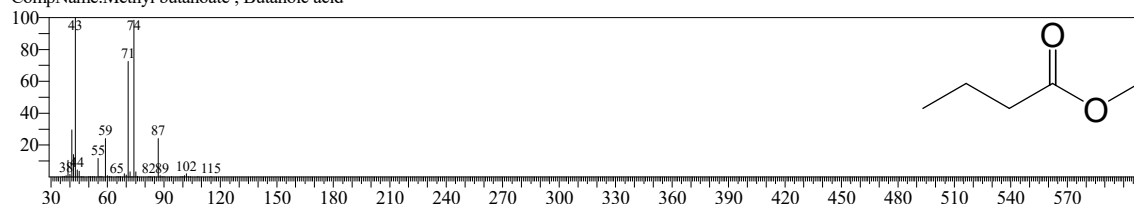

Hit#:2 Entry:2 Library:FA\_ME\_SP2560\_EI\_V3.lib

SI:52 Formula:C7H14O2 CAS:142-62-1 MolWeight:130 RetIndex:1332

CompName:Methyl caproate ; Hexanoic acid

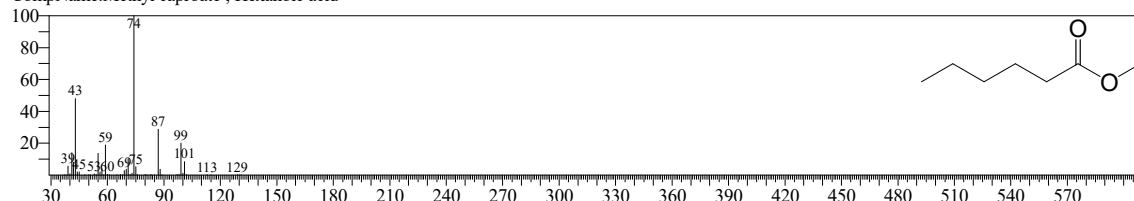

Hit#:3 Entry:3 Library:FA\_ME\_SP2560\_EI\_V3.lib

SI:46 Formula:C9H18O2 CAS:124-07-2 MolWeight:158 RetIndex:1550

CompName:Methyl caprylate ; Octanoic acid

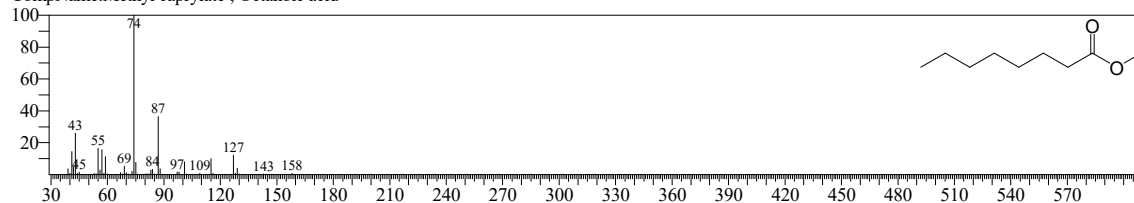

Hit#:4 Entry:477 Library:OA\_TMS\_DB5\_67min\_V3.lib

SI:41 Formula:C21H46OSi CAS:112-92-5 MolWeight:342 RetIndex:2156

CompName:Octadecanol-TMS ; octadecan-1-ol

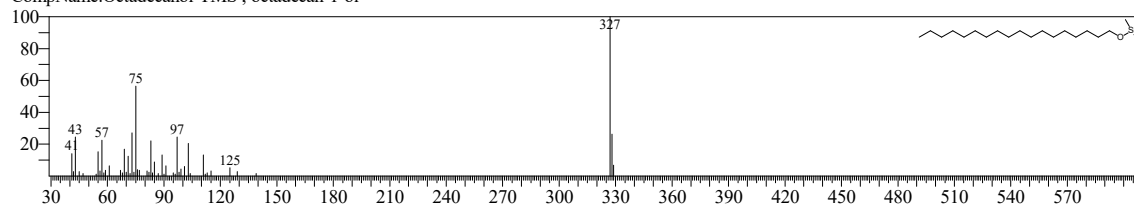

# TNAU

<< Target >>

Line#:1 R.Time:4.960(Scan#:93) MassPeaks:296

RawMode:Averaged 4.955-4.965(92-94) BasePeak:89.00(1797)

BG Mode:Calc. from Peak Group 1 - Event 1 Q3 Scan

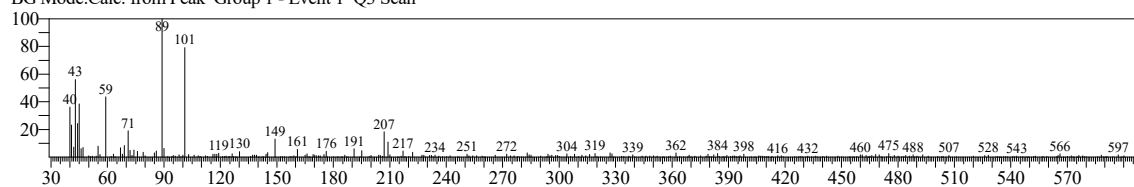

Hit#:5 Entry:4 Library:FA\_ME\_SP2560\_EI\_V3.lib

SI:38 Formula:C11H22O2 CAS:334-48-5 MolWeight:186 RetIndex:1767

CompName:Methyl caprate ; Decanoic acid

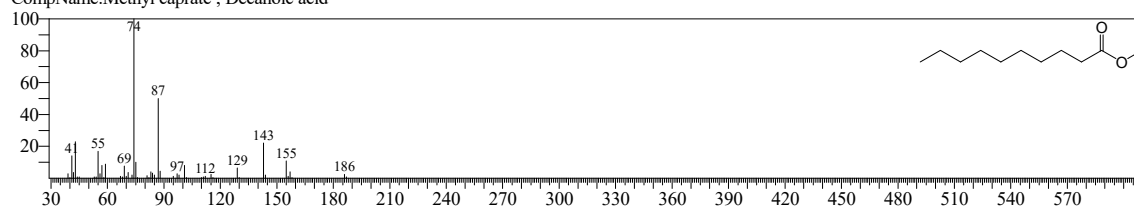

# TNAU

<< Target >>

Line# 2 R.Time: 7.945 (Scan#: 690) MassPeaks: 284

RawMode: Averaged 7.940-7.950 (689-691) BasePeak: 57.05 (5162)

BG Mode: Calc. from Peak Group 1 - Event 1 Q3 Scan

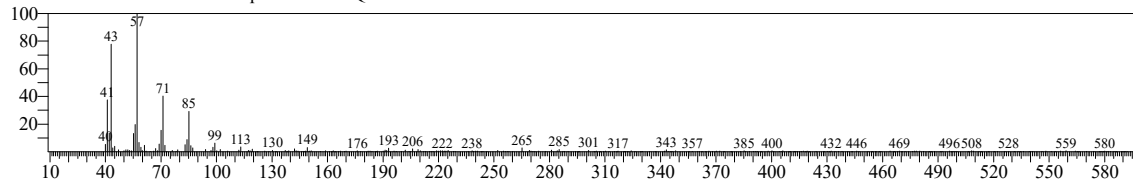

Hit#: 1 Entry: 12897 Library: NIST20R.lib

SI: 89 Formula: C<sub>11</sub>H<sub>24</sub> CAS: 1120-21-4 MolWeight: 156 RetIndex: 1100

CompName: Undecane \$\$ n-Undecane \$\$ Hendecane \$\$ n-C<sub>11</sub>H<sub>24</sub> \$\$ UN 2330

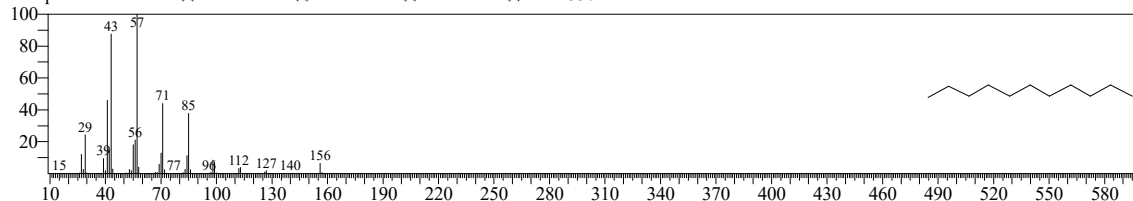

Hit#: 2 Entry: 40226 Library: NIST20M1.lib

SI: 89 Formula: C<sub>13</sub>H<sub>28</sub> CAS: 629-50-5 MolWeight: 184 RetIndex: 1300

CompName: Tridecane \$\$ n-Tridecane \$\$ Tridecane, n-

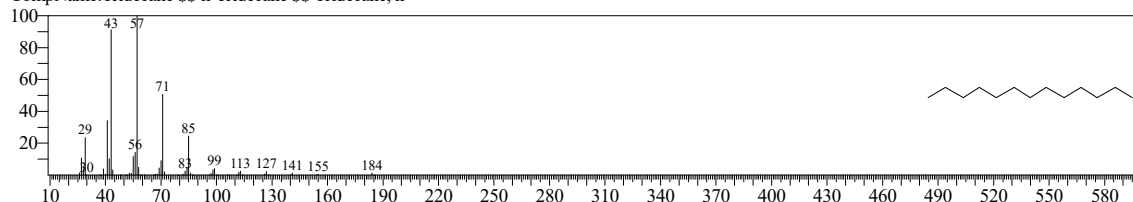

Hit#: 3 Entry: 30057 Library: NIST20M1.lib

SI: 89 Formula: C<sub>12</sub>H<sub>26</sub> CAS: 112-40-3 MolWeight: 170 RetIndex: 1200

CompName: Dodecane \$\$ n-Dodecane \$\$ Adakane 12 \$\$ Ba 51-090453 \$\$ CH<sub>3</sub>(CH<sub>2</sub>)<sub>10</sub>CH<sub>3</sub> \$\$ Bihexyl \$\$ Dihexyl \$\$ Duodecane \$\$ NSC 8714

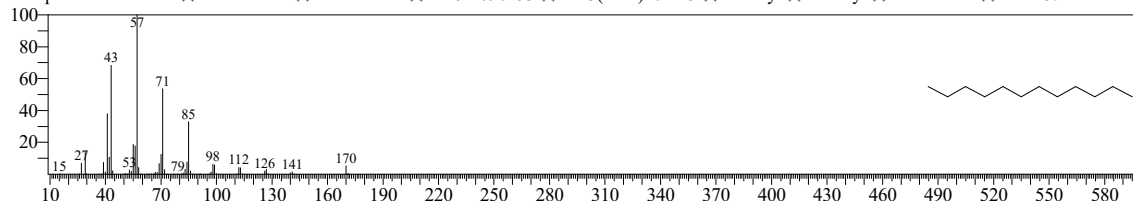

Hit#: 4 Entry: 13604 Library: NIST20M1.lib

SI: 89 Formula: C<sub>10</sub>H<sub>22</sub> CAS: 124-18-5 MolWeight: 142 RetIndex: 1000

CompName: Decane \$\$ n-Decane \$\$ n-C<sub>10</sub>H<sub>22</sub> \$\$ UN 2247

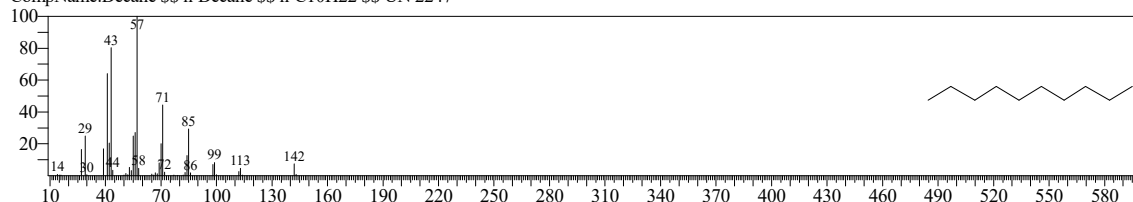

Hit#: 5 Entry: 27736 Library: NIST20R.lib

SI: 88 Formula: C<sub>16</sub>H<sub>34</sub> CAS: 544-76-3 MolWeight: 226 RetIndex: 1600

CompName: Hexadecane \$\$ n-Cetane \$\$ n-Hexadecane \$\$ Cetane

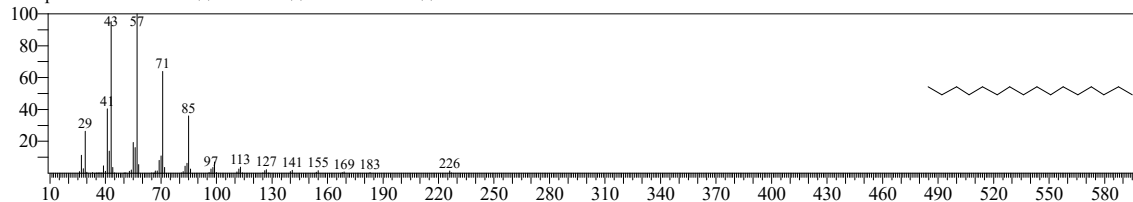

# TNAU

<< Target >>

Line#:3 R.Time:9.685(Scan#:1038) MassPeaks:244

RawMode:Averaged 9.680-9.690(1037-1039) BasePeak:57.10(5506)

BG Mode:Calc. from Peak Group 1 - Event 1 Q3 Scan

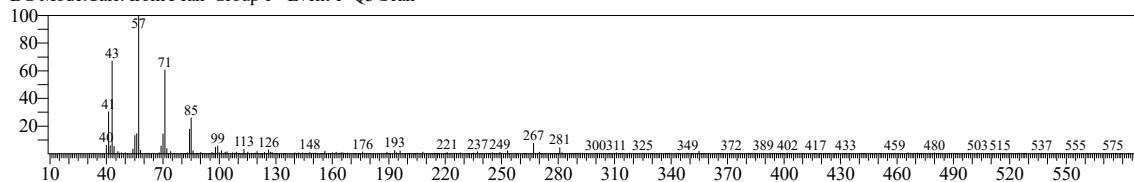

Hit#:1 Entry:21042 Library:NIST20M1.lib

SI:89 Formula:C11H24 CAS:1120-21-4 MolWeight:156 RetIndex:1100

CompName:Undecane \$\$ n-Undecane \$\$ Hendecane \$\$ n-C11H24 \$\$ UN 2330

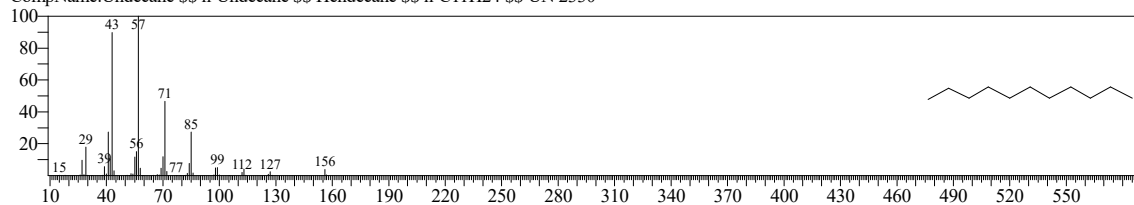

Hit#:2 Entry:21047 Library:NIST20M1.lib

SI:88 Formula:C11H24 CAS:17302-32-8 MolWeight:156 RetIndex:986

CompName:Nonane, 3,7-dimethyl- \$\$ 3,7-Dimethylnonane

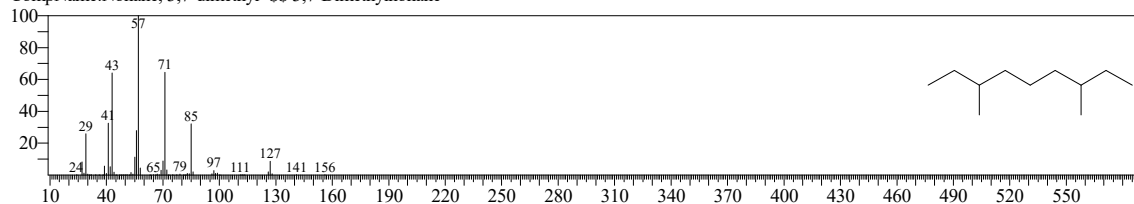

Hit#:3 Entry:19412 Library:NIST20R.lib

SI:88 Formula:C13H28 CAS:629-50-5 MolWeight:184 RetIndex:1300

CompName:Tridecane \$\$ n-Tridecane \$\$ Tridecane, n-

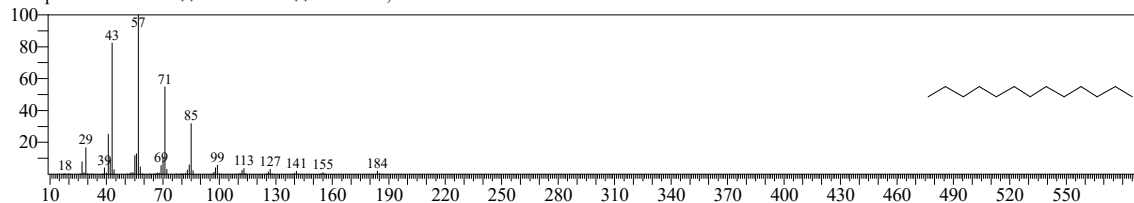

Hit#:4 Entry:27737 Library:NIST20R.lib

SI:88 Formula:C16H34 CAS:544-76-3 MolWeight:226 RetIndex:1600

CompName:Hexadecane \$\$ n-Cetane \$\$ n-Hexadecane \$\$ Cetane

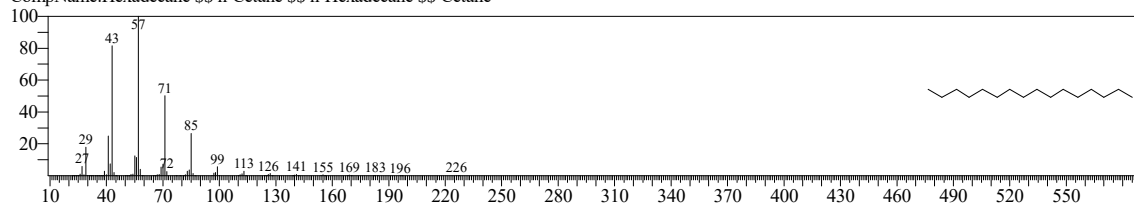

Hit#:5 Entry:13631 Library:NIST20M1.lib

SI:88 Formula:C10H22 CAS:15869-93-9 MolWeight:142 RetIndex:887

CompName:Octane, 3,5-dimethyl- \$\$ 3,5-Dimethyloctane

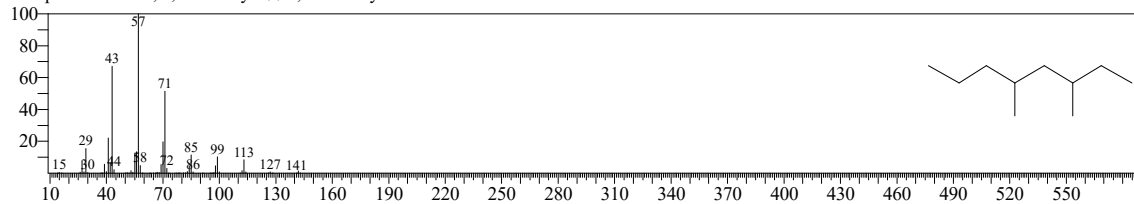

# TNAU

<< Target >>

Line#:4 R.Time:15.315(Scan#:2164) MassPeaks:320

RawMode:Averaged 15.310-15.320(2163-2165) BasePeak:44.00(401)

BG Mode:Calc. from Peak Group 1 - Event 1 Q3 Scan

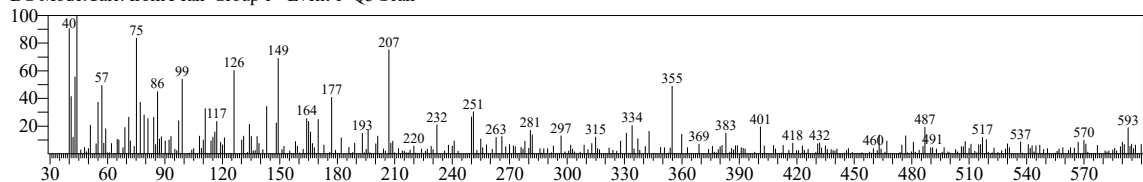

Hit#:1 Entry:15 Library:FA\_ME\_SP2560\_EI\_V3.lib

SI:32 Formula:C18H34O2 CAS:29743-97-3 MolWeight:282 RetIndex:2581

CompName:Methyl cis-10-heptadecenoate ; Heptadec-10-enoic acid

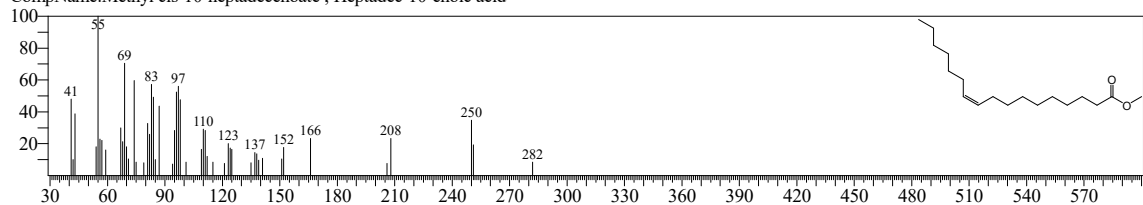

Hit#:2 Entry:30 Library:FA\_ME\_SP2560\_EI\_V3.lib

SI:31 Formula:C23H44O2 CAS:112-86-7 MolWeight:352 RetIndex:3070

CompName:Methyl erucate ; (Z)-docos-13-enoic acid

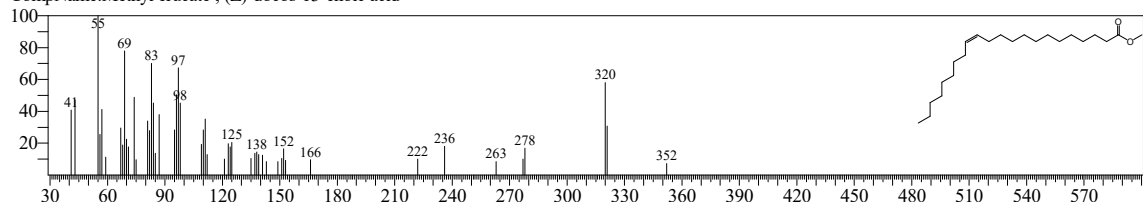

Hit#:3 Entry:24 Library:FA\_ME\_SP2560\_EI\_V3.lib

SI:31 Formula:C21H40O2 CAS:5561-99-9 MolWeight:324 RetIndex:2874

CompName:Methyl cis-11-icosenoate ; ; Icos-11-enoic acid

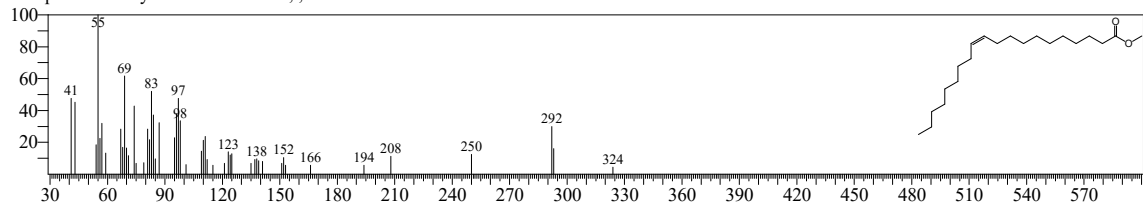

Hit#:4 Entry:37 Library:FA\_ME\_SP2560\_EI\_V3.lib

SI:29 Formula:C25H48O2 CAS:506-37-6 MolWeight:380 RetIndex:3263

CompName:Methyl nervonate ; Tetracos-15-enoic acid

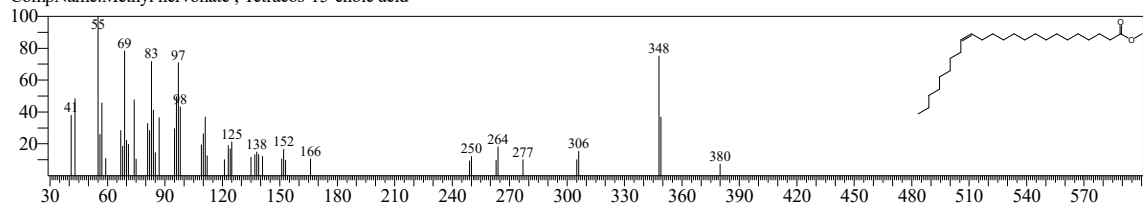

Hit#:5 Entry:11 Library:OA\_TMS\_DB5\_67min\_V3.lib

SI:29 Formula:C9H20O2Si CAS:142-62-1 MolWeight:188 RetIndex:1071

CompName:Caproic acid-TMS ; hexanoic acid

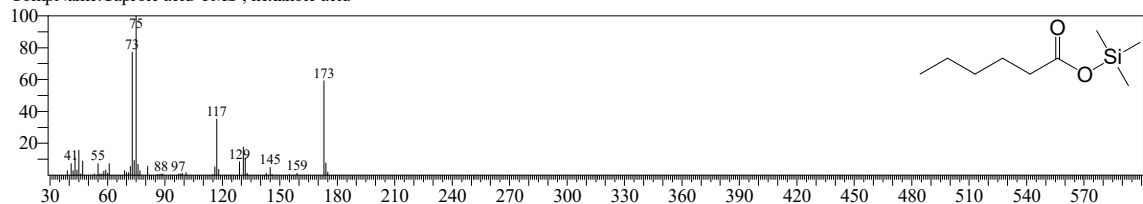

# TNAU

<< Target >>

Line#5 R.Time:15.465(Scan#:2194) MassPeaks:291

RawMode:Averaged 15.460-15.470(2193-2195) BasePeak:191.10(9704)

BG Mode:Calc. from Peak Group 1 - Event 1 Q3 Scan

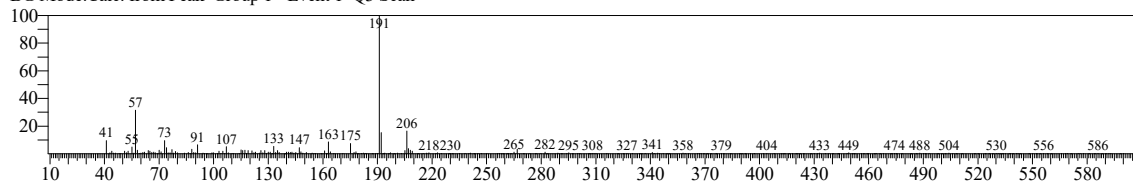

Hit#1 Entry:59048 Library:NIST20M1.lib

SI:89 Formula:C<sub>14</sub>H<sub>22</sub>O CAS:96-76-4 MolWeight:206 RetIndex:1555

CompName:2,4-Di-tert-butylphenol \$\$ Phenol, 2,4-bis(1,1-dimethylethyl)- \$\$ Phenol, 2,4-di-tert-butyl- \$\$ 2,4-di-t-Butylphenol \$\$ 1-Hydroxy-2,4-di-tert-bu

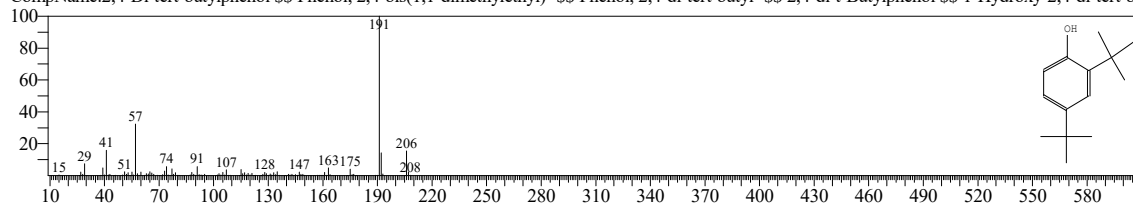

Hit#2 Entry:24098 Library:NIST20R.lib

SI:88 Formula:C<sub>14</sub>H<sub>22</sub>O CAS:5875-45-6 MolWeight:206 RetIndex:1555

CompName:Phenol, 2,5-bis(1,1-dimethylethyl)- \$\$ Phenol, 2,5-di-tert-butyl- \$\$ 2,5-Di-tert-butylphenol \$\$ 2,5-bis(1,1-Dimethylethyl)phenol

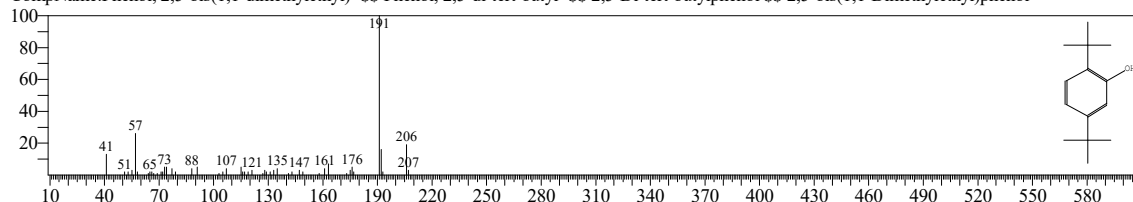

Hit#3 Entry:24110 Library:NIST20R.lib

SI:88 Formula:C<sub>14</sub>H<sub>22</sub>O CAS:1138-52-9 MolWeight:206 RetIndex:1555

CompName:Phenol, 3,5-bis(1,1-dimethylethyl)- \$\$ Phenol, 3,5-di-tert-butyl- \$\$ 3,5-Di-tert-butylphenol \$\$ Phenol, 3,5-bis(t-butyl) \$\$ 3,5-Di-t-butylphenol \$

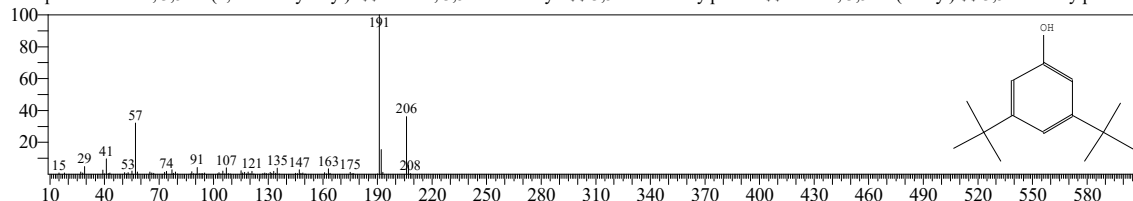

Hit#4 Entry:59031 Library:NIST20M1.lib

SI:86 Formula:C<sub>14</sub>H<sub>22</sub>O CAS:128-39-2 MolWeight:206 RetIndex:1555

CompName:Phenol, 2,6-bis(1,1-dimethylethyl)- \$\$ Phenol, 2,6-di-tert-butyl- \$\$ 2,6-Bis(tert-butyl)phenol \$\$ 2,6-Bis(1,1-dimethylethyl)phenol \$\$ 2,6-Di-tert

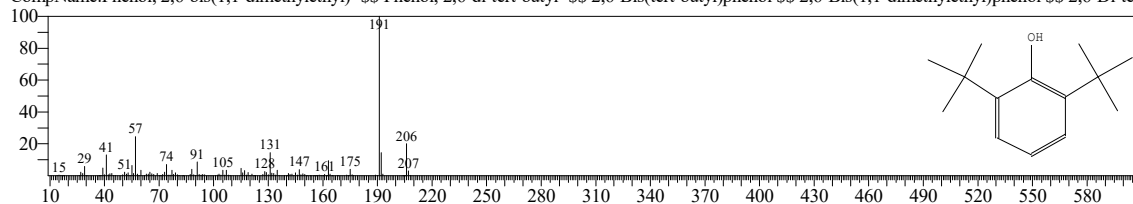

Hit#5 Entry:170993 Library:NIST20M1.lib

SI:82 Formula:C<sub>19</sub>H<sub>30</sub>O<sub>3</sub> CAS:166273-38-7 MolWeight:306 RetIndex:2255

CompName:Pentanoic acid, 5-hydroxy-, 2,4-di-t-butylphenyl esters \$\$ 2,4-Di-tert-butylphenyl 5-hydroxypentanoate #

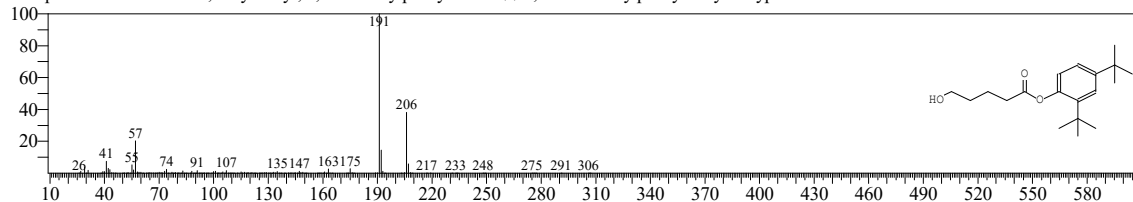

# TNAU

<< Target >>

Line#6 R.Time:16.915(Scan#:2484) MassPeaks:315

RawMode:Averaged 16.910-16.920(2483-2485) BasePeak:73.05(1550)

BG Mode:Calc. from Peak Group 1 - Event 1 Q3 Scan

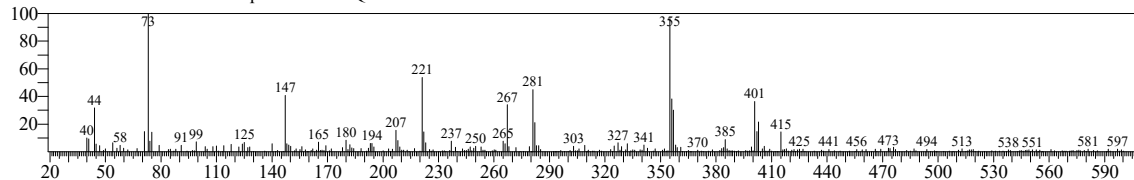

Hit#1 Entry:42384 Library:NIST20M2.lib

SI:78 Formula:C16H48O8Si8 CAS:556-68-3 MolWeight:592 RetIndex:1654

CompName:Cyclooctasiloxane, hexadecamethyl- \$\$ Hexadecamethyl-cyclooctasiloxane \$\$ Hexadecamethylcyclooctasiloxane \$\$ 2,2,4,4,6,6,8,8,10,10,12,12

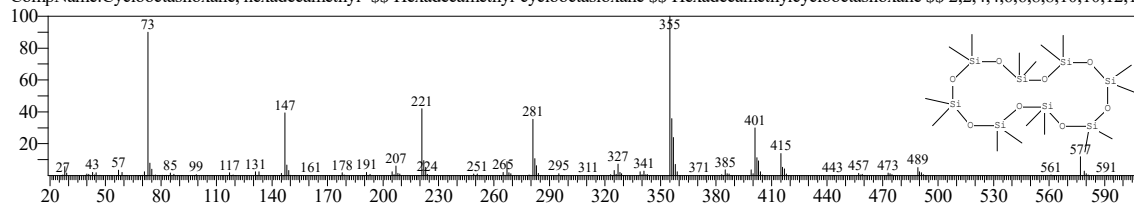

Hit#2 Entry:402 Library:OA\_TMS\_DB5\_67min\_V3.lib

SI:60 Formula:C20H42O4Si4 CAS:775-01-9 MolWeight:458 RetIndex:1942

CompName:3,4-Dihydroxymandelic acid-4TMS ; 2-(3,4-dihydroxyphenyl)-2-hydroxyacetic acid

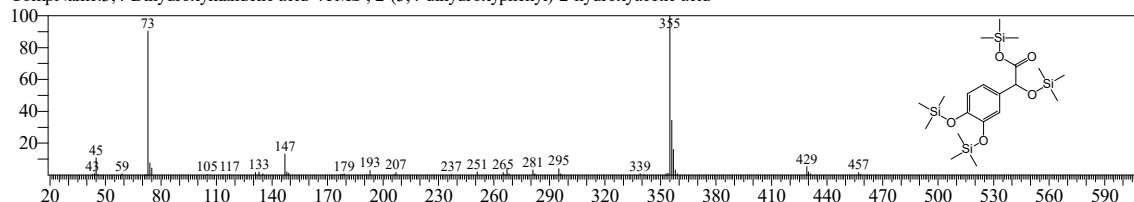

Hit#3 Entry:343 Library:OA\_TMS\_DB5\_67min\_V3.lib

SI:59 Formula:C18H37NO3Si3 CAS:51-43-4 MolWeight:399 RetIndex:1868

CompName:Epinephrine-3TMS ; 4-[(1R)-1-hydroxy-2-(methylamino)ethyl]benzene-1,2-diol

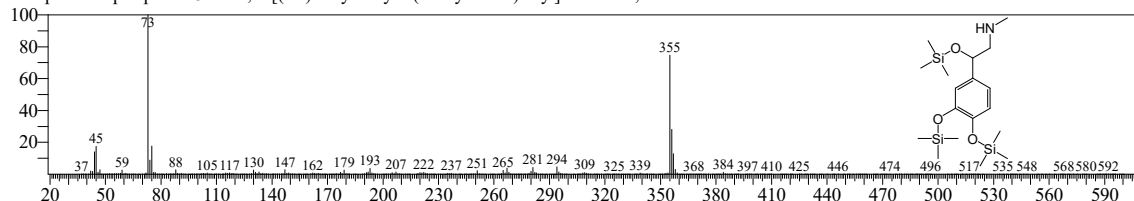

Hit#4 Entry:438 Library:OA\_TMS\_DB5\_67min\_V3.lib

SI:49 Formula:C12H22N2O2Si2 CAS:104-98-3 MolWeight:282 RetIndex:2014

CompName:Urocanic acid-2TMS ; (E)-3-(1H-imidazol-5-yl)prop-2-enoic acid

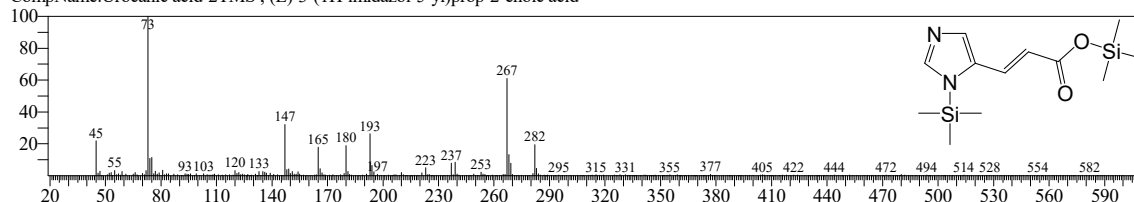

Hit#5 Entry:328 Library:OA\_TMS\_DB5\_67min\_V3.lib

SI:47 Formula:C13H23NO2Si2 CAS:150-13-0 MolWeight:281 RetIndex:1845

CompName:4-Aminobenzoic acid-2TMS ; 4-aminobenzoic acid

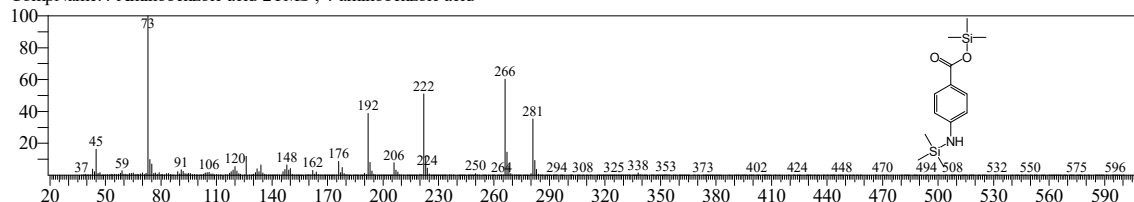



<< Target >>

Line#:7 R.Time:18.605(Scan#:2822) MassPeaks:318

RawMode:Averaged 18.600-18.610(2821-2823) BasePeak:73.05(1050)

BG Mode:Calc. from Peak Group 1 - Event 1 Q3 Scan

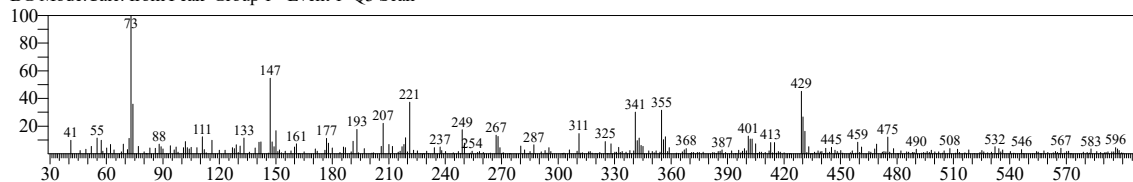

Hit#:1 Entry:402 Library:OA TMS\_DB5\_67min\_V3.lib

SI:50 Formula:C20H42O4Si4 CAS:775-01-9 MolWeight:458 RetIndex:1942

CompName:3,4-Dihydroxymandelic acid-4TMS ; 2-(3,4-dihydroxyphenyl)-2-hydroxyacetic acid

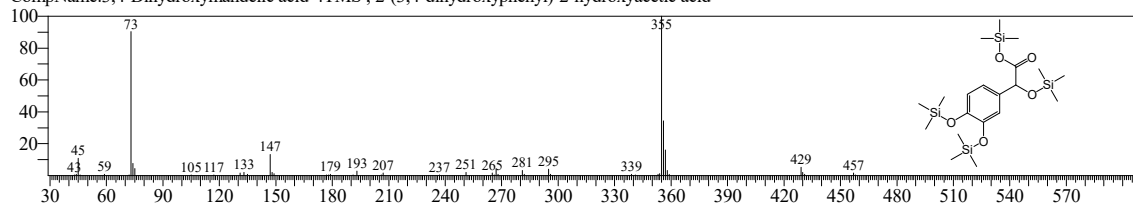

Hit#:2 Entry:143 Library:OA TMS\_DB5\_67min\_V3.lib

SI:45 Formula: CAS:0-00-0 MolWeight:354 RetIndex:1495

CompName:Malic acid-13C4-3TMS ;

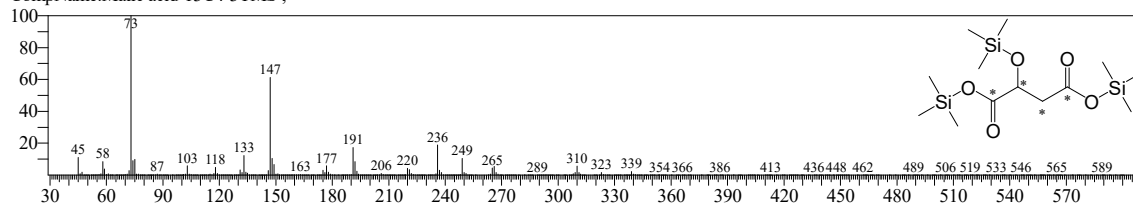

Hit#:3 Entry:194 Library:OA TMS\_DB5\_67min\_V3.lib

SI:45 Formula:C15H26O3Si2 CAS:828-01-3 MolWeight:310 RetIndex:1599

CompName:3-Phenyllactic acid-2TMS ; 2-hydroxy-3-phenylpropanoic acid

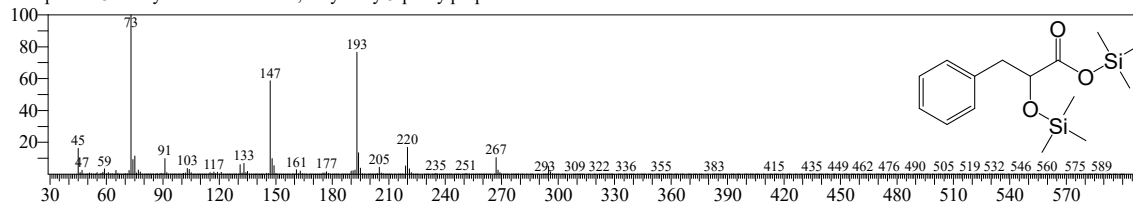

Hit#:4 Entry:24 Library:OA TMS\_DB5\_67min\_V3.lib

SI:43 Formula: CAS:0-00-0 MolWeight:236 RetIndex:1130

CompName:Oxalic acid-13C2-2TMS ;

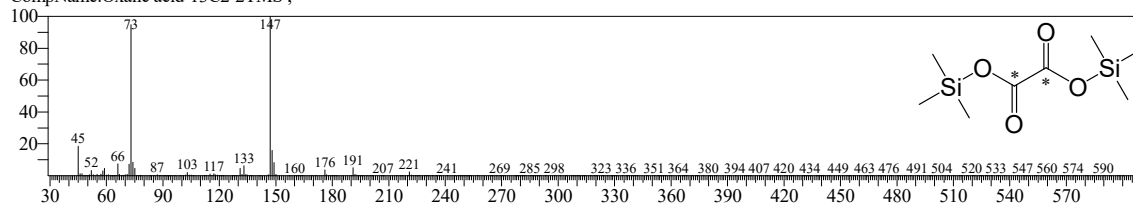

Hit#:5 Entry:343 Library:OA TMS\_DB5\_67min\_V3.lib

SI:42 Formula:C18H37NO3Si3 CAS:51-43-4 MolWeight:399 RetIndex:1868

CompName:Epinephrine-3TMS ; 4-[(1R)-1-hydroxy-2-(methylamino)ethyl]benzene-1,2-diol

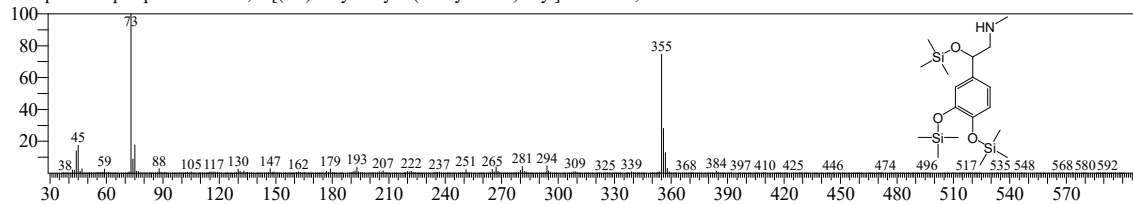

# TNAU

<< Target >>

Line#:8 R.Time:19.945(Scan#:3090) MassPeaks:288

RawMode:Averaged 19.940-19.950(3089-3091) BasePeak:58.10(4556)

BG Mode:Calc. from Peak Group 1 - Event 1 Q3 Scan

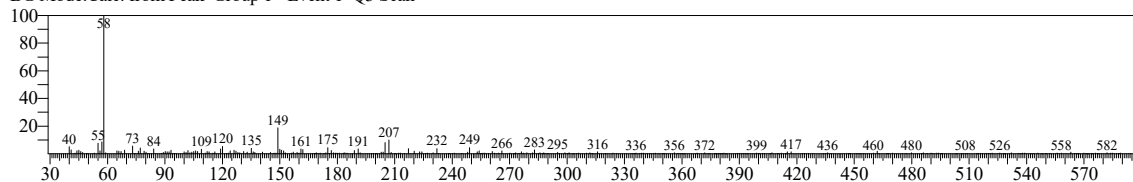

Hit#:1 Entry:1 Library:OA\_TMS\_DB5\_67min\_V3.lib

SI:61 Formula:C7H17NO2Si CAS:1118-68-9 MolWeight:175 RetIndex:990

CompName:Dimethylglycine-TMS ; 2-(dimethylamino)acetic acid

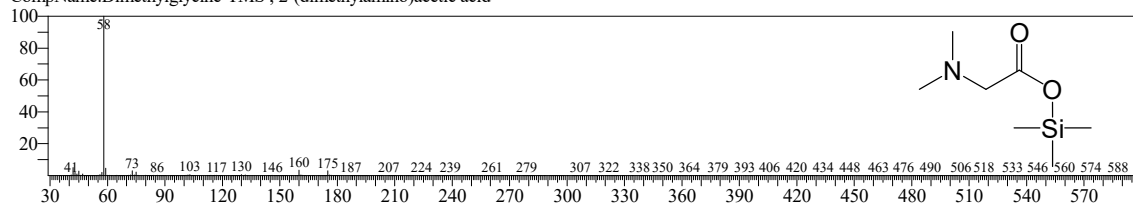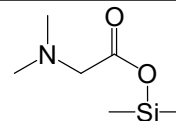

Hit#:2 Entry:28 Library:OA\_TMS\_DB5\_67min\_V3.lib

SI:37 Formula: CAS:347840-04-4 MolWeight:236 RetIndex:1140

CompName:Sarcosine-d3-2TMS ;

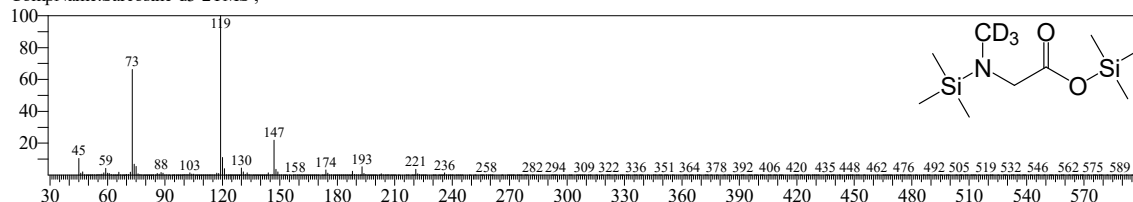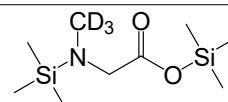

Hit#:3 Entry:53 Library:OA\_TMS\_DB5\_67min\_V3.lib

SI:36 Formula: CAS:35045-72-8 MolWeight:269 RetIndex:1218

CompName:Valine-d8-2TMS ;

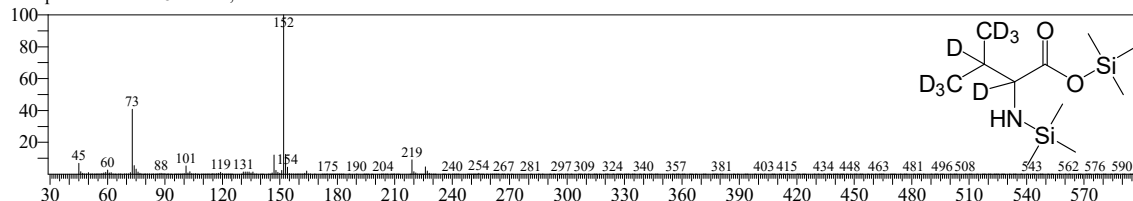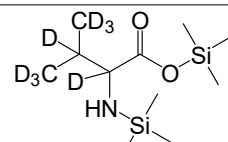

Hit#:4 Entry:409 Library:OA\_TMS\_DB5\_67min\_V3.lib

SI:36 Formula:C14H32N2O3Si2 CAS:692-04-6 MolWeight:332 RetIndex:1951

CompName:N6-Acetyllysine-2TMS ; (2S)-6-acetamido-2-aminohexanoic acid

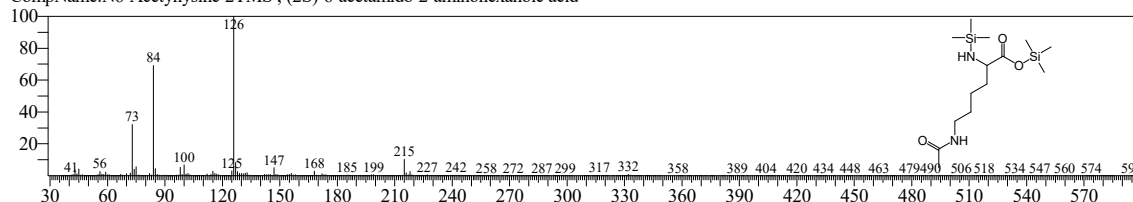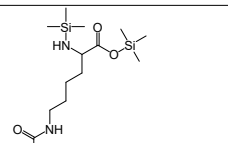

Hit#:5 Entry:94 Library:OA\_TMS\_DB5\_67min\_V3.lib

SI:36 Formula:C12H22O2Si2 CAS:120-80-9 MolWeight:254 RetIndex:1327

CompName:Catechol-2TMS ; benzene-1,2-diol

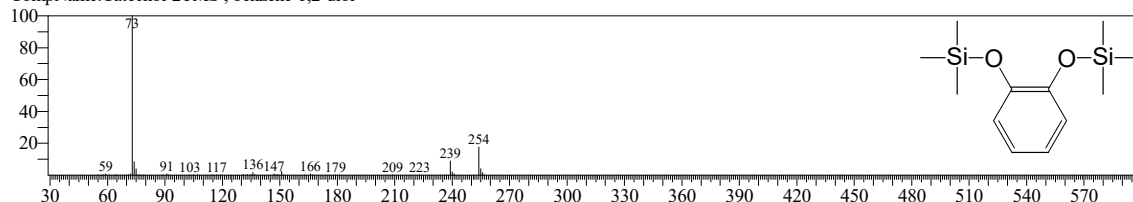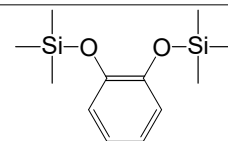

# TNAU

<< Target >>

Line#:9 R.Time:20.445(Scan#:3190) MassPeaks:308

RawMode:Averaged 20.440-20.450(3189-3191) BasePeak:149.05(1701)

BG Mode:Calc. from Peak Group 1 - Event 1 Q3 Scan

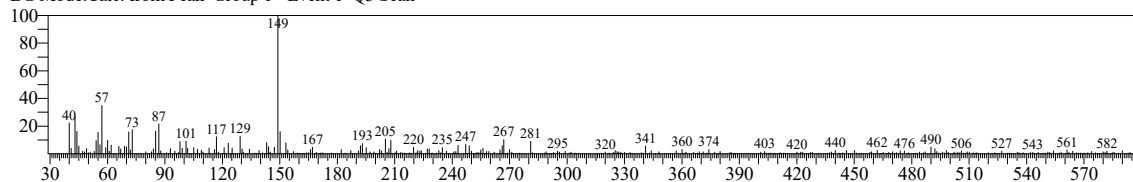

Hit#:1 Entry:539 Library:OA\_TMS\_DB5\_67min\_V3.lib

SI:45 Formula:C27H60O3Si2 CAS:544-62-7 MolWeight:488 RetIndex:2684

CompName:Batyl alcohol-2TMS ; 3-octadecoxypropane-1,2-diol

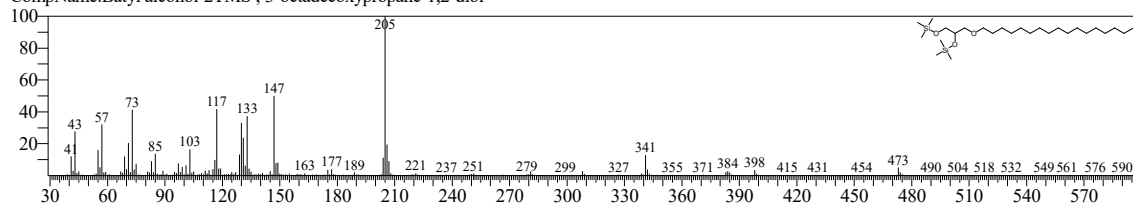

Hit#:2 Entry:92 Library:OA\_TMS\_DB5\_67min\_V3.lib

SI:43 Formula:C10H22O4Si2 CAS:110-15-6 MolWeight:262 RetIndex:1313

CompName:Succinic acid-2TMS ; butanedioic acid

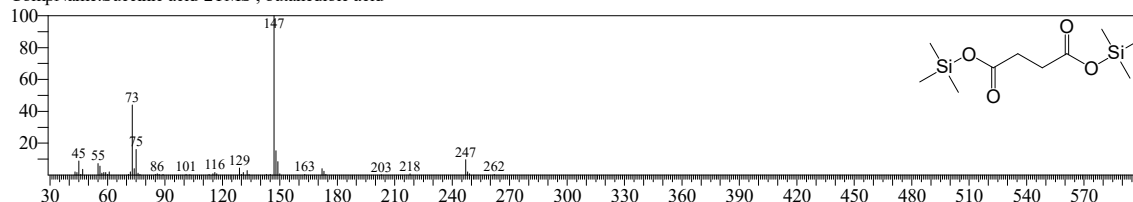

Hit#:3 Entry:52 Library:OA\_TMS\_DB5\_67min\_V3.lib

SI:41 Formula:C10H22O4Si2 CAS:516-05-2 MolWeight:262 RetIndex:1218

CompName:Methylmalonic acid-2TMS ; 2-methylpropanedioic acid

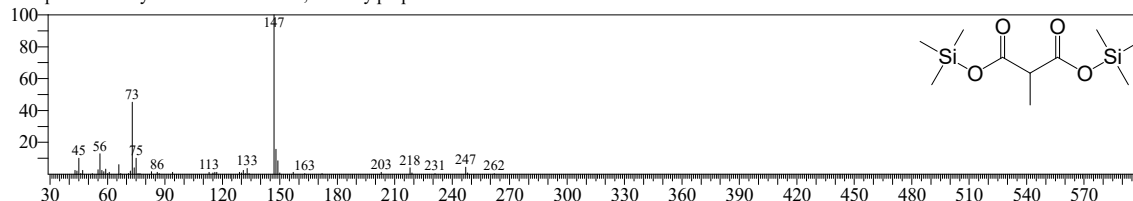

Hit#:4 Entry:80 Library:OA\_TMS\_DB5\_67min\_V3.lib

SI:41 Formula:C11H24O4Si2 CAS:601-75-2 MolWeight:276 RetIndex:1284

CompName:Ethylmalonic acid-2TMS ; 2-ethylpropanedioic acid

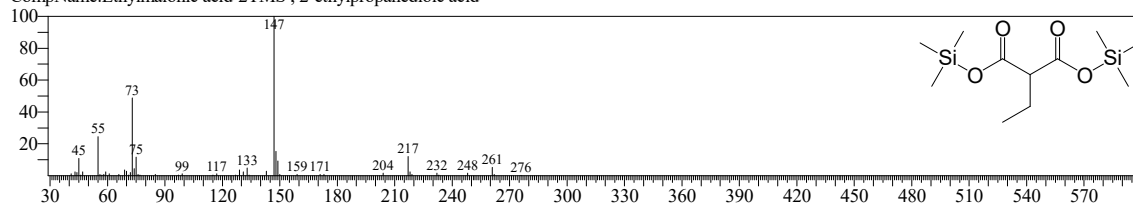

Hit#:5 Entry:8 Library:OA\_TMS\_DB5\_67min\_V3.lib

SI:41 Formula:C9H22O3Si2 CAS:79-33-4 MolWeight:234 RetIndex:1061

CompName:Lactic acid-2TMS ; (2S)-2-hydroxypropanoic acid

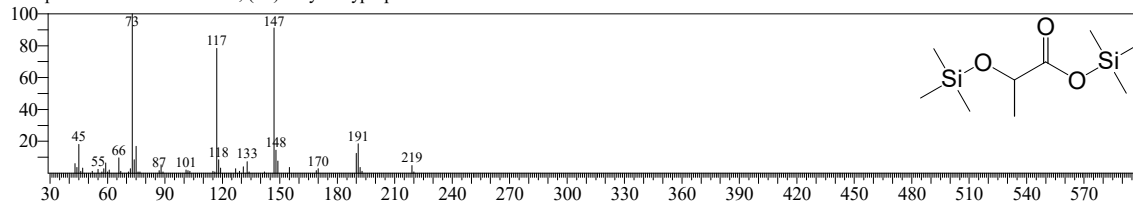

# TNAU

<< Target >>

Line#:10 R.Time:24.955(Scan#:4092) MassPeaks:316

RawMode:Averaged 24.950-24.960(4091-4093) BasePeak:221.10(1198)

BG Mode:Calc. from Peak Group 1 - Event 1 Q3 Scan

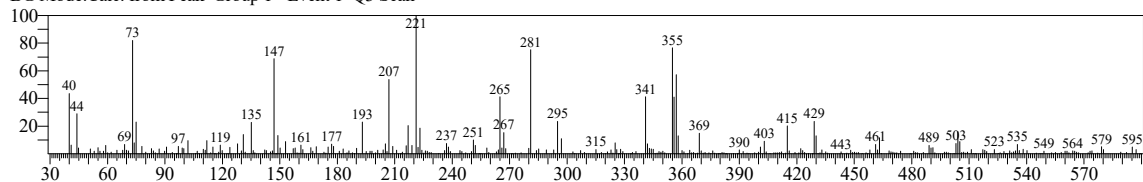

Hit#:1 Entry:402 Library:OA\_TMS\_DB5\_67min\_V3.lib

SI:54 Formula:C20H42O4Si4 CAS:775-01-9 MolWeight:458 RetIndex:1942

CompName:3,4-Dihydroxymandelic acid-4TMS ; 2-(3,4-dihydroxyphenyl)-2-hydroxyacetic acid

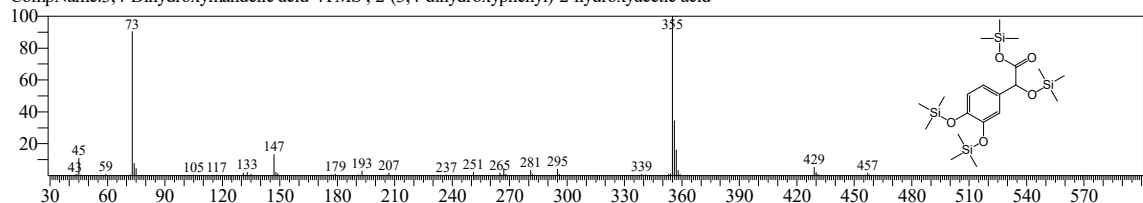

Hit#:2 Entry:343 Library:OA\_TMS\_DB5\_67min\_V3.lib

SI:50 Formula:C18H37NO3Si3 CAS:51-43-4 MolWeight:399 RetIndex:1868

CompName:Epinephrine-3TMS ; 4-[(1R)-1-hydroxy-2-(methylamino)ethyl]benzene-1,2-diol

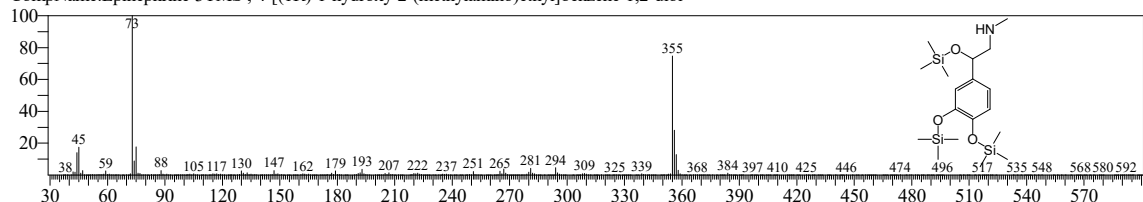

Hit#:3 Entry:315 Library:OA\_TMS\_DB5\_67min\_V3.lib

SI:39 Formula:C16H30O4Si3 CAS:99-50-3 MolWeight:370 RetIndex:1833

CompName:Protocatechuic acid-3TMS ; 3,4-dihydroxybenzoic acid

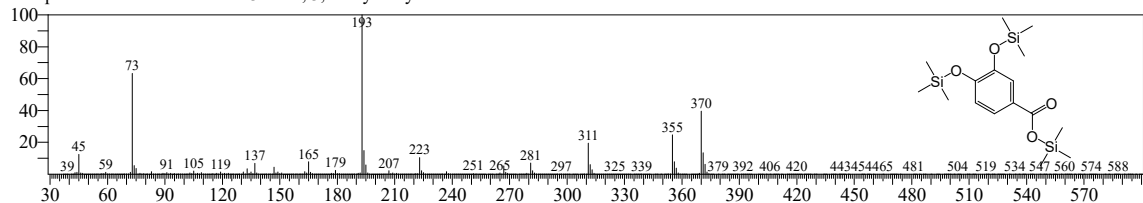

Hit#:4 Entry:194 Library:OA\_TMS\_DB5\_67min\_V3.lib

SI:37 Formula:C15H26O3Si2 CAS:828-01-3 MolWeight:310 RetIndex:1599

CompName:3-Phenyllactic acid-2TMS ; 2-hydroxy-3-phenylpropanoic acid

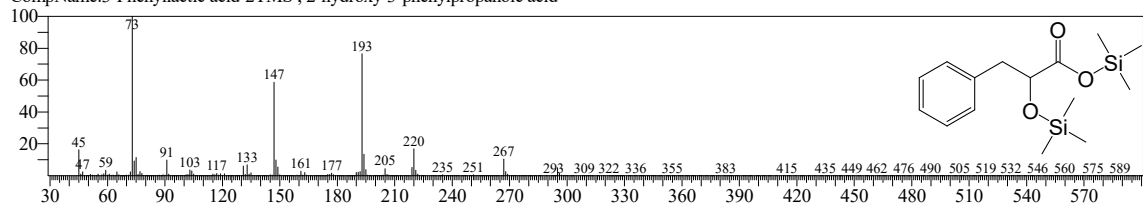

Hit#:5 Entry:384 Library:OA\_TMS\_DB5\_67min\_V3.lib

SI:36 Formula:C17H35NO3Si3 CAS:65-23-6 MolWeight:385 RetIndex:1919

CompName:Pyridoxine-3TMS ; 4,5-bis(hydroxymethyl)-2-methylpyridin-3-ol

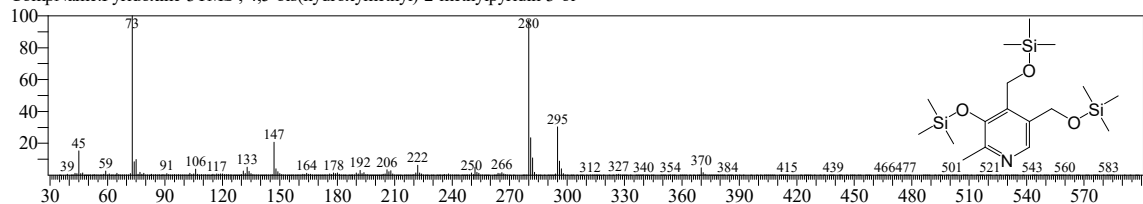

# TNAU

<< Target >>

Line#:11 R.Time:25.980(Scan#:4297) MassPeaks:330

RawMode:Averaged 25.975-25.985(4296-4298) BasePeak:355.00(1871)

BG Mode:Calc. from Peak Group 1 - Event 1 Q3 Scan

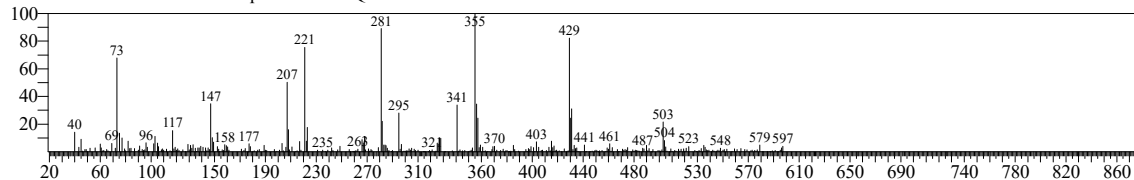

Hit#:1 Entry:46368 Library:NIST20M2.lib

SI:78 Formula:C<sub>24</sub>H<sub>72</sub>O<sub>12</sub>Si<sub>12</sub> CAS:18919-94-3 MolWeight:888 RetIndex:2480

CompName:Tetracosamethyl-cyclododecasiloxane \$ \$ 2,2,4,4,6,6,8,8,10,10,12,12,14,14,16,16,18,18,20,20,22,22,24,24-Tetracosamethylcyclododecasiloxan

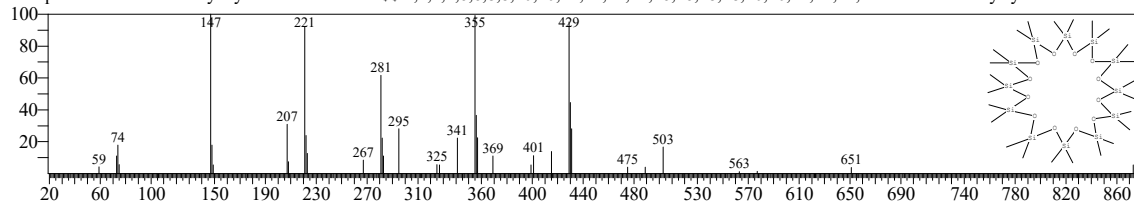

Hit#:2 Entry:43658 Library:NIST20R.lib

SI:73 Formula:C<sub>18</sub>H<sub>54</sub>O<sub>9</sub>Si<sub>9</sub> CAS:556-71-8 MolWeight:666 RetIndex:1860

CompName:Cyclononasiloxane, octadecamethyl- \$ \$ Octadecamethyl-cyclononasiloxane \$ \$ 2,2,4,4,6,6,8,8,10,10,12,12,14,14,16,16,18,18-Octadecamethyley

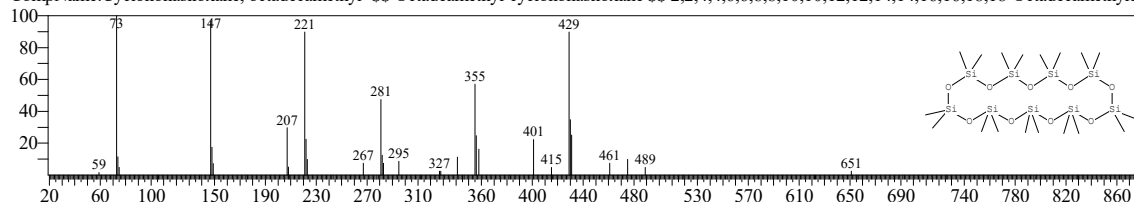

Hit#:3 Entry:45685 Library:NIST20M2.lib

SI:72 Formula:C<sub>20</sub>H<sub>60</sub>O<sub>10</sub>Si<sub>10</sub> CAS:18772-36-6 MolWeight:740 RetIndex:2067

CompName:Cyclodecasiloxane, eicosamethyl- \$ \$ 2,2,4,4,6,6,8,8,10,10,12,12,14,14,16,16,18,18,20,20-Icosamethylcyclodecasiloxane # \$ \$ Eicosamethyl-cy

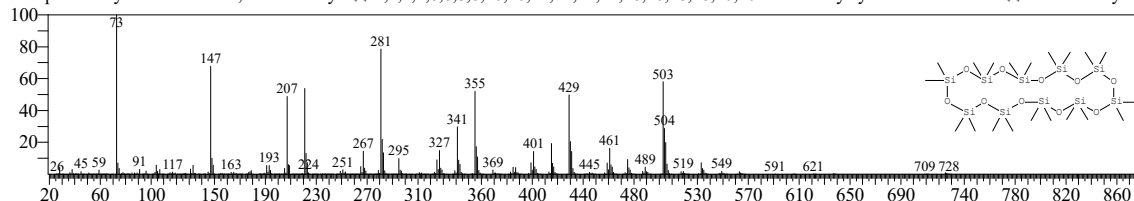

Hit#:4 Entry:402 Library:OA\_TMS\_DB5\_67min\_V3.lib

SI:58 Formula:C<sub>20</sub>H<sub>42</sub>O<sub>4</sub>Si<sub>4</sub> CAS:775-01-9 MolWeight:458 RetIndex:1942

CompName:3,4-Dihydroxymandelic acid-4TMS ; 2-(3,4-dihydroxyphenyl)-2-hydroxyacetic acid

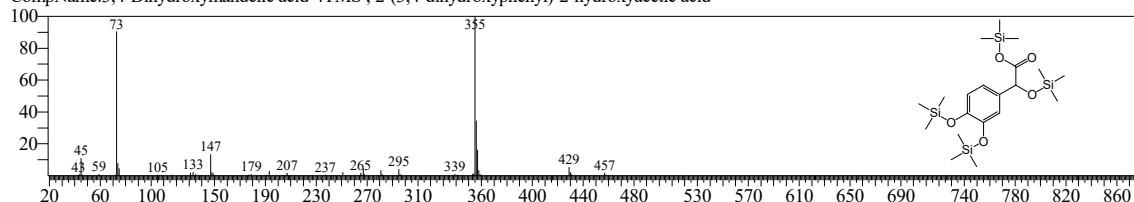

Hit#:5 Entry:343 Library:OA\_TMS\_DB5\_67min\_V3.lib

SI:47 Formula:C<sub>18</sub>H<sub>37</sub>NO<sub>3</sub>Si<sub>3</sub> CAS:51-43-4 MolWeight:399 RetIndex:1868

CompName:Epinephrine-3TMS ; 4-[(1R)-1-hydroxy-2-(methylamino)ethyl]benzene-1,2-diol

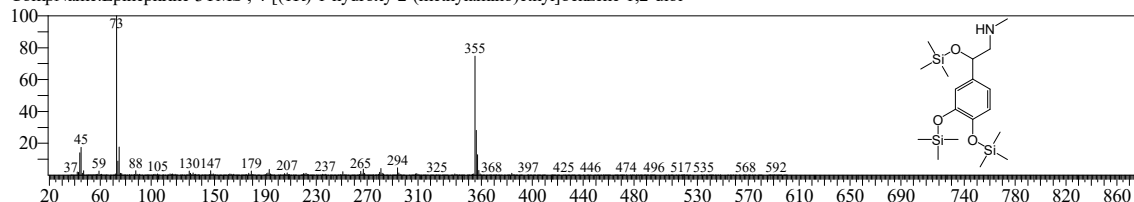

# TNAU

<< Target >>

Line#:12 R.Time:26.930(Scan#:4487) MassPeaks:350

RawMode:Averaged 26.925-26.935(4486-4488) BasePeak:73.00(1968)

BG Mode:Calc. from Peak Group 1 - Event 1 Q3 Scan

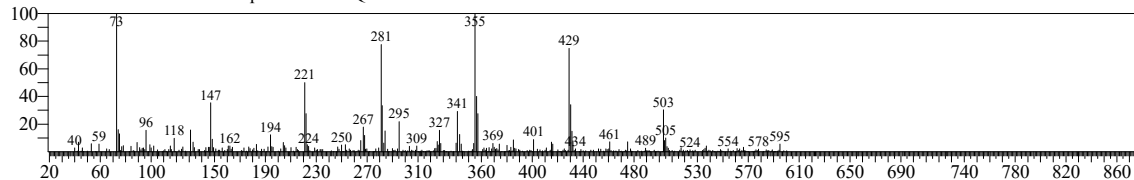

Hit#:1 Entry:45685 Library:NIST20M2.lib

SI:76 Formula:C20H60O10Si10 CAS:18772-36-6 MolWeight:740 RetIndex:2067

CompName:Cyclodocasiloxane, eicosamethyl- \$\$ 2,2,4,4,6,6,8,8,10,10,12,12,14,14,16,16,18,18,20,20-Icosamethylcyclodocasiloxane # \$\$ Eicosamethyl-cy

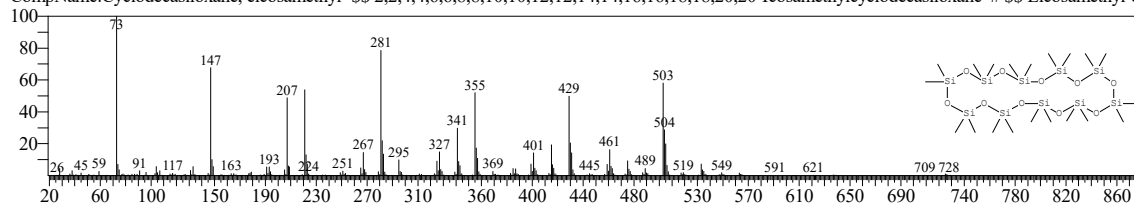

Hit#:2 Entry:46368 Library:NIST20M2.lib

SI:75 Formula:C24H72O12Si12 CAS:18919-94-3 MolWeight:888 RetIndex:2480

CompName:Tetracosamethyl-cyclododecasiloxane \$\$ 2,2,4,4,6,6,8,8,10,10,12,12,14,14,16,16,18,18,20,20,22,22,24,24-Tetracosamethylcyclododecasiloxan

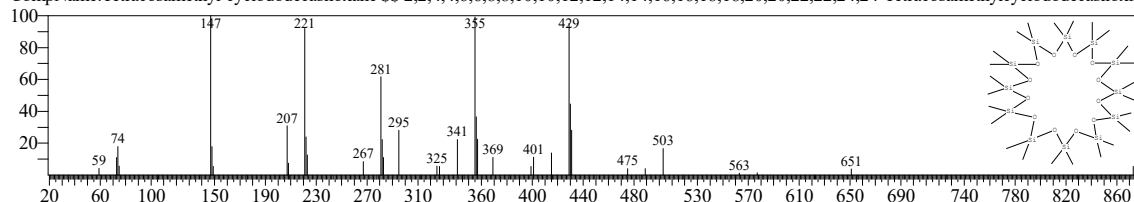

Hit#:3 Entry:43659 Library:NIST20R.lib

SI:73 Formula:C18H54O9Si9 CAS:556-71-8 MolWeight:666 RetIndex:1860

CompName:Cyclononasiloxane, octadecamethyl- \$\$ Octadecamethyl-cyclononasiloxane \$\$ 2,2,4,4,6,6,8,8,10,10,12,12,14,14,16,16,18,18-Octadecamethylcy

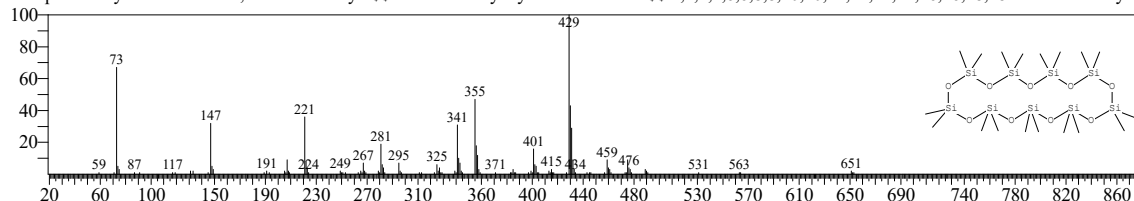

Hit#:4 Entry:402 Library:OA\_TMS\_DB5\_67min\_V3.lib

SI:59 Formula:C20H42O4Si4 CAS:775-01-9 MolWeight:458 RetIndex:1942

CompName:3,4-Dihydroxymandelic acid-4TMS ; 2-(3,4-dihydroxyphenyl)-2-hydroxyacetic acid



Hit#:5 Entry:343 Library:OA\_TMS\_DB5\_67min\_V3.lib

SI:50 Formula:C18H37NO3Si3 CAS:51-43-4 MolWeight:399 RetIndex:1868

CompName:Epinephrine-3TMS ; 4-[(1R)-1-hydroxy-2-(methylamino)ethyl]benzene-1,2-diol

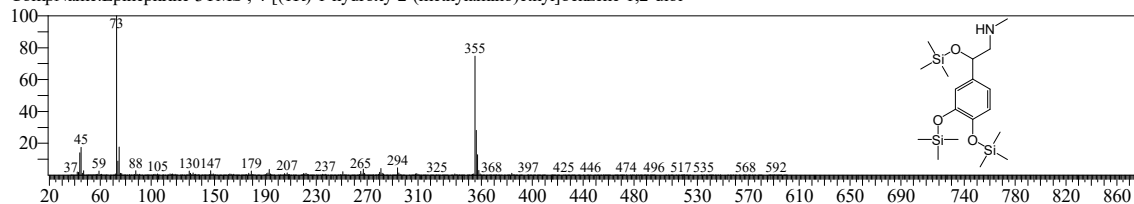

# TNAU

<< Target >>

Line#:13 R.Time:27.820(Scan#:4665) MassPeaks:306

RawMode:Averaged 27.815-27.825(4664-4666) BasePeak:355.05(2625)

BG Mode:Calc. from Peak Group 1 - Event 1 Q3 Scan

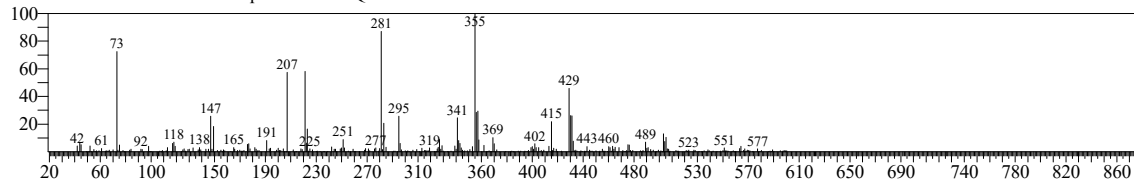

Hit#:1 Entry:45685 Library:NIST20M2.lib

SI:75 Formula:C20H60O10Si10 CAS:18772-36-6 MolWeight:740 RetIndex:2067

CompName:Cyclodecasiloxane, eicosamethyl- \$\$ 2,2,4,4,6,6,8,8,10,10,12,12,14,14,16,16,18,18,20,20-Icosamethylcyclodecasiloxane # \$\$ Eicosamethyl-cy

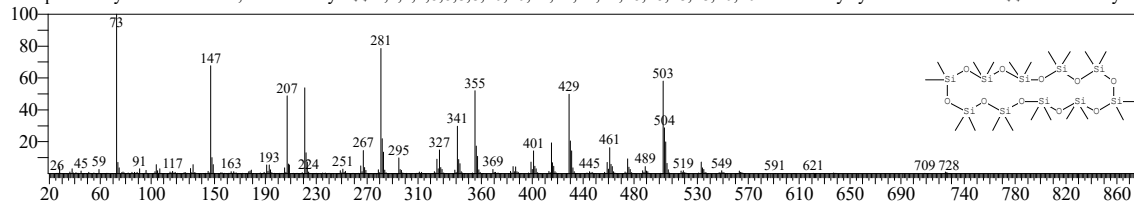

Hit#:2 Entry:46368 Library:NIST20M2.lib

SI:74 Formula:C24H72O12Si12 CAS:18919-94-3 MolWeight:888 RetIndex:2480

CompName:Tetracosamethyl-cyclodecasiloxane \$\$ 2,2,4,4,6,6,8,8,10,10,12,12,14,14,16,16,18,18,20,20,22,22,24,24-Tetracosamethylcyclodecasiloxan



Hit#:3 Entry:44570 Library:NIST20M2.lib

SI:73 Formula:C18H54O9Si9 CAS:556-71-8 MolWeight:666 RetIndex:1860

CompName:Cyclononasiloxane, octadecamethyl- \$\$ Octadecamethyl-cyclononasiloxane \$\$ 2,2,4,4,6,6,8,8,10,10,12,12,14,14,16,16,18,18-Octadecamethylcy

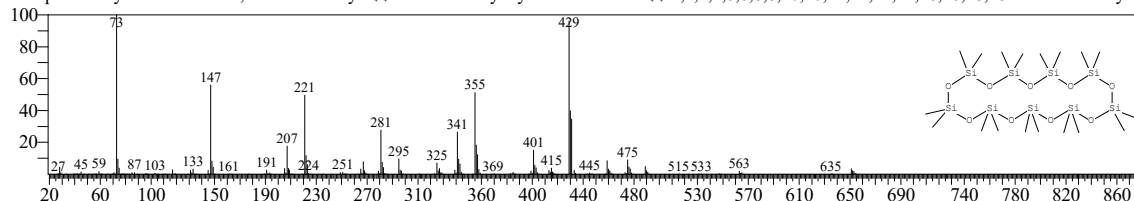

Hit#:4 Entry:402 Library:OA\_TMS\_DB5\_67min\_V3.lib

SI:60 Formula:C20H42O4Si4 CAS:775-01-9 MolWeight:458 RetIndex:1942

CompName:3,4-Dihydroxymandelic acid-4TMS ; 2-(3,4-dihydroxyphenyl)-2-hydroxyacetic acid



Hit#:5 Entry:343 Library:OA\_TMS\_DB5\_67min\_V3.lib

SI:51 Formula:C18H37NO3Si3 CAS:51-43-4 MolWeight:399 RetIndex:1868

CompName:Epinephrine-3TMS ; 4-[(1R)-1-hydroxy-2-(methylamino)ethyl]benzene-1,2-diol

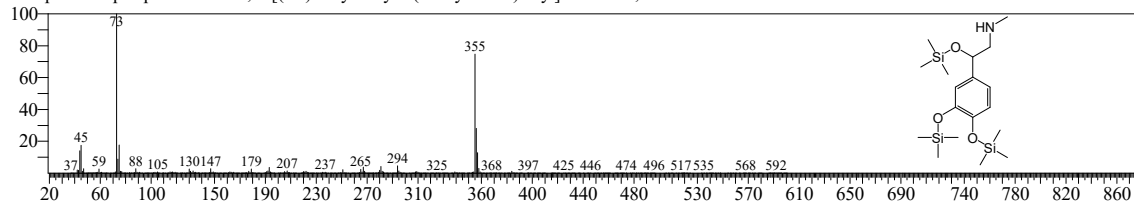

# TNAU

<< Target >>

Line#:14 R.Time:28.625(Scan#:4826) MassPeaks:304

RawMode:Averaged 28.620-28.630(4825-4827) BasePeak:191.00(583)

BG Mode:Calc. from Peak Group 1 - Event 1 Q3 Scan

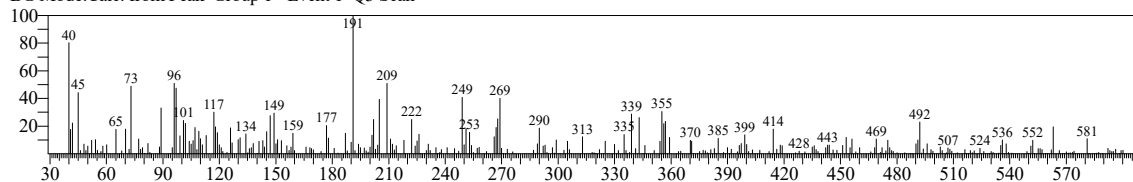

Hit#:1 Entry:343 Library:OA\_TMS\_DB5\_67min\_V3.lib

SI:33 Formula:C18H37NO3Si3 CAS:51-43-4 MolWeight:399 RetIndex:1868

CompName:Epinephrine-3TMS ; 4-[(1R)-1-hydroxy-2-(methylamino)ethyl]benzene-1,2-diol

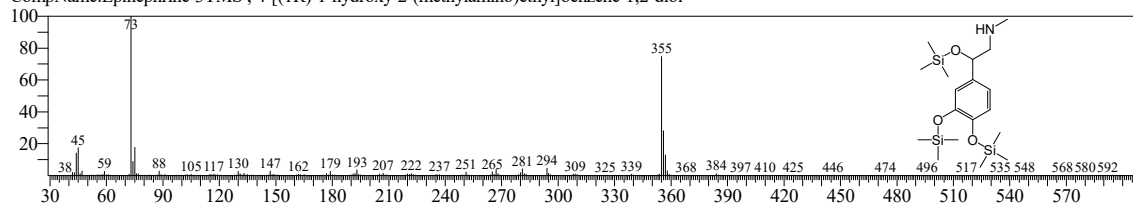

Hit#:2 Entry:77 Library:OA\_TMS\_DB5\_67min\_V3.lib

SI:32 Formula:C12H32O3Si3 CAS:56-81-5 MolWeight:308 RetIndex:1279

CompName:Glycerol-3TMS ; propane-1,2,3-triol

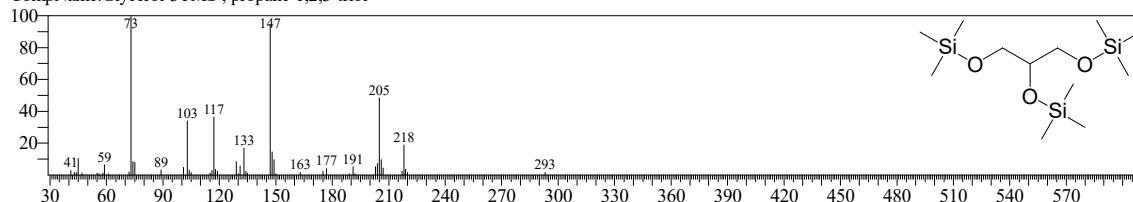

Hit#:3 Entry:255 Library:OA\_TMS\_DB5\_67min\_V3.lib

SI:31 Formula:C18H45NO5Si4 CAS:551-84-8 MolWeight:467 RetIndex:1698

CompName:Xylulose-meto-4TMS ; (3S,4R)-1,3,4,5-tetrahydroxypentan-2-one

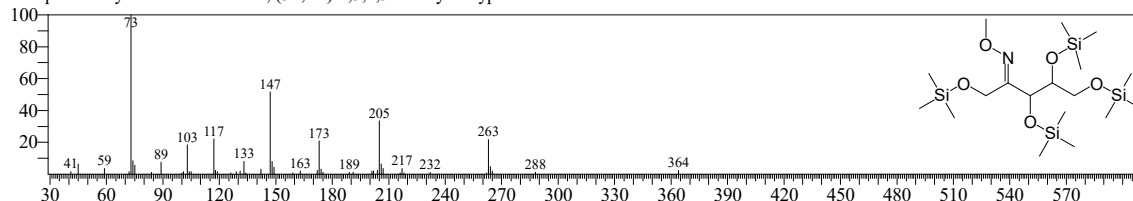

Hit#:4 Entry:402 Library:OA\_TMS\_DB5\_67min\_V3.lib

SI:31 Formula:C20H42O4Si4 CAS:775-01-9 MolWeight:458 RetIndex:1942

CompName:3,4-Dihydroxymandelic acid-4TMS ; 2-(3,4-dihydroxyphenyl)-2-hydroxyacetic acid

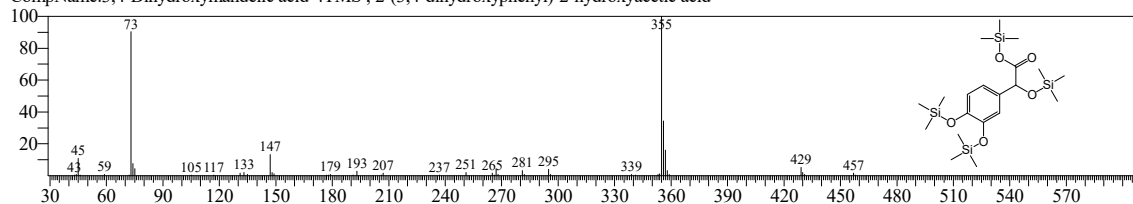

Hit#:5 Entry:8 Library:OA\_TMS\_DB5\_67min\_V3.lib

SI:29 Formula:C9H22O3Si2 CAS:79-33-4 MolWeight:234 RetIndex:1061

CompName:Lactic acid-2TMS ; (2S)-2-hydroxypropanoic acid

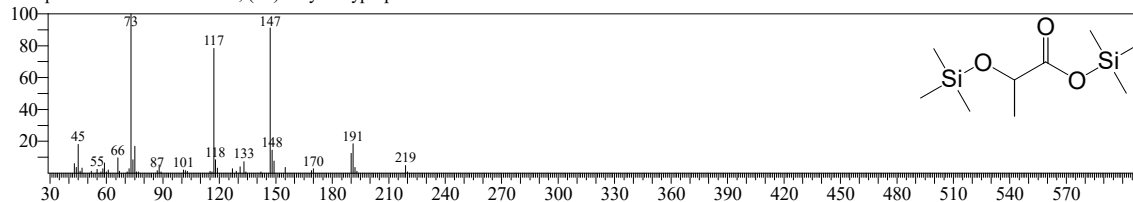



# TNAU

<< Target >>

Line#:15 R.Time:28.710(Scan#:4843) MassPeaks:350

RawMode:Averaged 28.705-28.715(4842-4844) BasePeak:207.00(1912)

BG Mode:Calc. from Peak Group 1 - Event 1 Q3 Scan

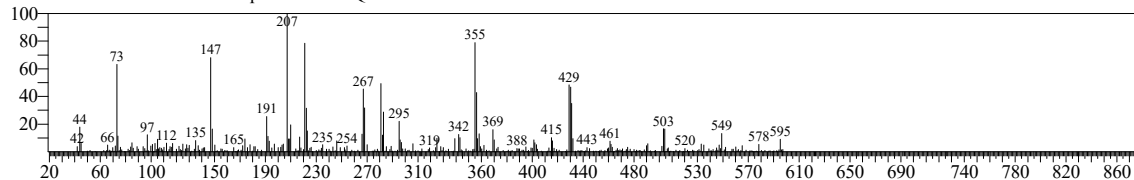

Hit#:1 Entry:46368 Library:NIST20M2.lib

SI:73 Formula:C<sub>24</sub>H<sub>72</sub>O<sub>12</sub>Si<sub>12</sub> CAS:18919-94-3 MolWeight:888 RetIndex:2480

CompName:Tetracosamethyl-cyclododecasiloxane \$ 2,2,4,4,6,6,8,8,10,10,12,12,14,14,16,16,18,18,20,20,22,22,24,24-Tetracosamethylcyclododecasiloxan



Hit#:2 Entry:45685 Library:NIST20M2.lib

SI:71 Formula:C<sub>20</sub>H<sub>60</sub>O<sub>10</sub>Si<sub>10</sub> CAS:18772-36-6 MolWeight:740 RetIndex:2067

CompName:Cyclodecasiloxane, eicosamethyl- \$ 2,2,4,4,6,6,8,8,10,10,12,12,14,14,16,16,18,18,20,20-Icosamethylcyclodecasiloxane # \$ Eicosamethyl-cy

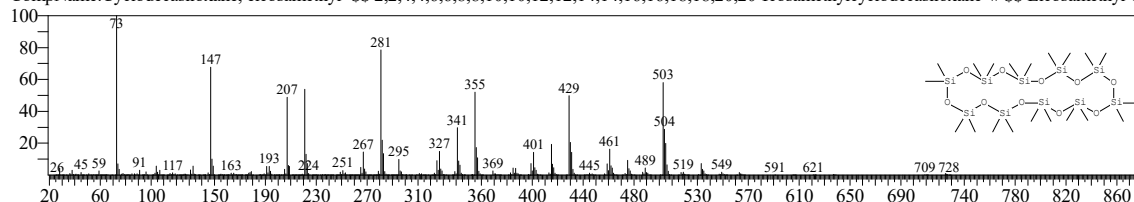

Hit#:3 Entry:43658 Library:NIST20R.lib

SI:70 Formula:C<sub>18</sub>H<sub>54</sub>O<sub>9</sub>Si<sub>9</sub> CAS:556-71-8 MolWeight:666 RetIndex:1860

CompName:Cyclononasiloxane, octadecamethyl- \$ 2,2,4,4,6,6,8,8,10,10,12,12,14,14,16,16,18,18-Octadecamethylcy

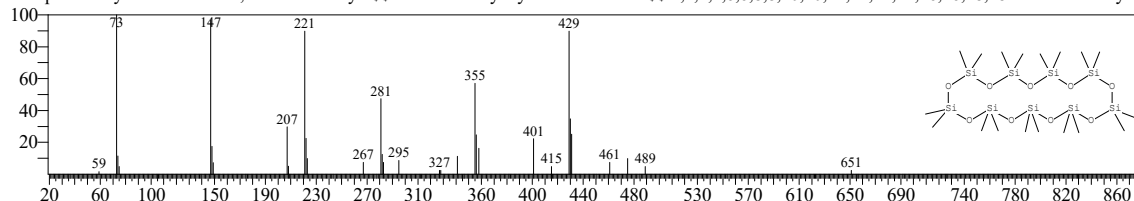

Hit#:4 Entry:402 Library:OA\_TMS\_DB5\_67min\_V3.lib

SI:52 Formula:C<sub>20</sub>H<sub>42</sub>O<sub>4</sub>Si<sub>4</sub> CAS:775-01-9 MolWeight:458 RetIndex:1942

CompName:3,4-Dihydroxymandelic acid-4TMS ; 2-(3,4-dihydroxyphenyl)-2-hydroxyacetic acid



Hit#:5 Entry:343 Library:OA\_TMS\_DB5\_67min\_V3.lib

SI:45 Formula:C<sub>18</sub>H<sub>37</sub>NO<sub>3</sub>Si<sub>3</sub> CAS:51-43-4 MolWeight:399 RetIndex:1868

CompName:Epinephrine-3TMS ; 4-[(1R)-1-hydroxy-2-(methylamino)ethyl]benzene-1,2-diol



<< Target >>

Line#:16 R.Time:29.900(Scan#:5081) MassPeaks:297

RawMode:Averaged 29.895-29.905(5080-5082) BasePeak:281.00(868)

BG Mode:Calc. from Peak Group 1 - Event 1 Q3 Scan

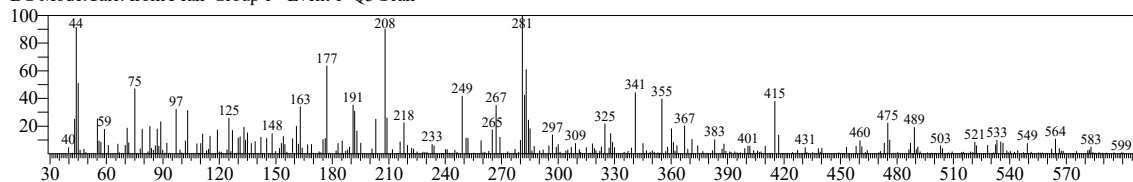

Hit#:1 Entry:179 Library:OA\_TMS\_DB5\_67min\_V3.lib

SI:30 Formula:C<sub>13</sub>H<sub>22</sub>O<sub>3</sub>Si<sub>2</sub> CAS:99-06-9 MolWeight:282 RetIndex:1572

CompName:3-Hydroxybenzoic acid-2TMS ; 3-hydroxybenzoic acid

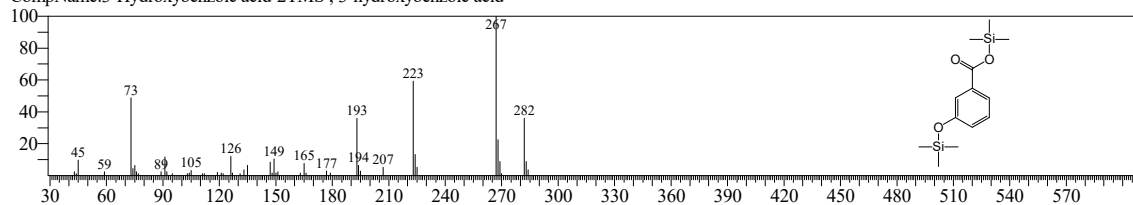

Hit#:2 Entry:211 Library:OA\_TMS\_DB5\_67min\_V3.lib

SI:29 Formula:C<sub>13</sub>H<sub>22</sub>O<sub>3</sub>Si<sub>2</sub> CAS:99-96-7 MolWeight:282 RetIndex:1636

CompName:4-Hydroxybenzoic acid-2TMS ; 4-hydroxybenzoic acid

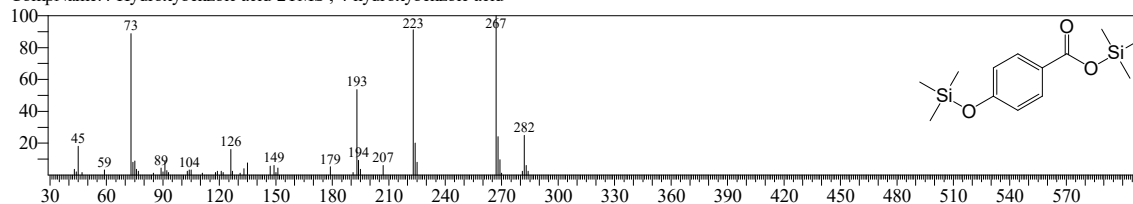

Hit#:3 Entry:310 Library:OA\_TMS\_DB5\_67min\_V3.lib

SI:27 Formula:C<sub>11</sub>H<sub>20</sub>N<sub>4</sub>O<sub>3</sub>Si<sub>2</sub> CAS:68-94-0 MolWeight:280 RetIndex:1822

CompName:Hypoxanthine-2TMS ; 3,7-dihydropurin-6-one

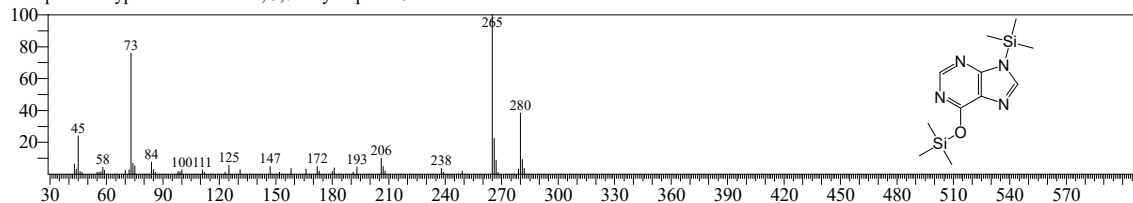

Hit#:4 Entry:402 Library:OA\_TMS\_DB5\_67min\_V3.lib

SI:26 Formula:C<sub>20</sub>H<sub>42</sub>O<sub>4</sub>Si<sub>4</sub> CAS:775-01-9 MolWeight:458 RetIndex:1942

CompName:3,4-Dihydroxymandelic acid-4TMS ; 2-(3,4-dihydroxyphenyl)-2-hydroxyacetic acid



Hit#:5 Entry:315 Library:OA\_TMS\_DB5\_67min\_V3.lib

SI:25 Formula:C<sub>16</sub>H<sub>30</sub>O<sub>4</sub>Si<sub>3</sub> CAS:99-50-3 MolWeight:370 RetIndex:1833

CompName:Protocatechuic acid-3TMS ; 3,4-dihydroxybenzoic acid

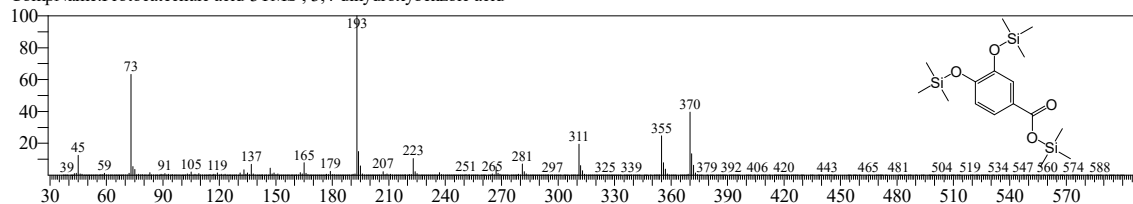

# TNAU

<< Target >>

Line#:17 R.Time:30.015(Scan#:5104) MassPeaks:318

RawMode:Averaged 30.010-30.020(5103-5105) BasePeak:281.05(2054)

BG Mode:Calc. from Peak Group 1 - Event 1 Q3 Scan

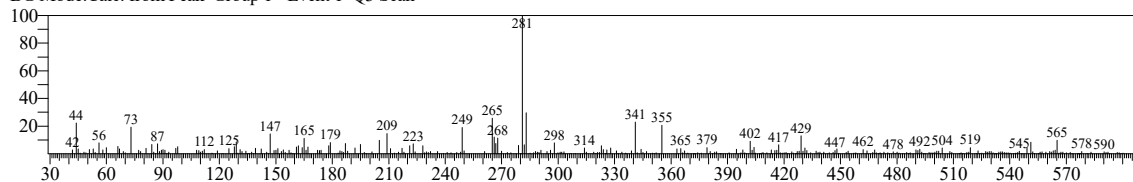

Hit#:1 Entry:341 Library:OA\_TMS\_DB5\_67min\_V3.lib

SI:38 Formula:C18H34O4Si3 CAS:3247-75-4 MolWeight:398 RetIndex:1864

CompName:3-(3-Hydroxyphenyl)-3-hydroxypropionic acid-3TMS ; 3-hydroxy-3-(3-hydroxyphenyl)propanoic acid

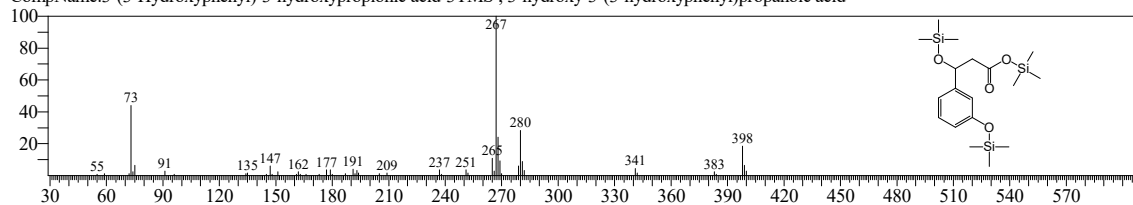

Hit#:2 Entry:328 Library:OA\_TMS\_DB5\_67min\_V3.lib

SI:37 Formula:C13H23NO2Si2 CAS:150-13-0 MolWeight:281 RetIndex:1845

CompName:4-Aminobenzoic acid-2TMS ; 4-aminobenzoic acid

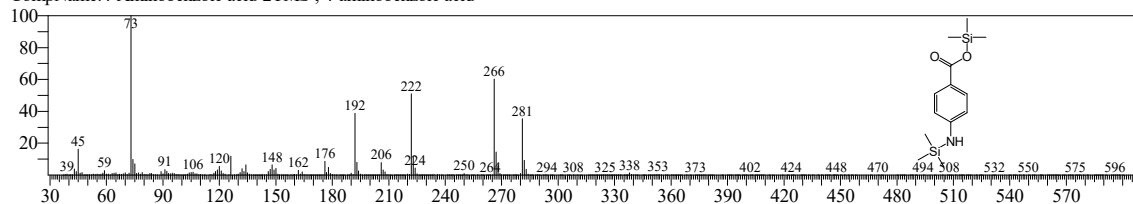

Hit#:3 Entry:402 Library:OA\_TMS\_DB5\_67min\_V3.lib

SI:37 Formula:C20H42O4Si4 CAS:775-01-9 MolWeight:458 RetIndex:1942

CompName:3,4-Dihydroxymandelic acid-4TMS ; 2-(3,4-dihydroxyphenyl)-2-hydroxyacetic acid

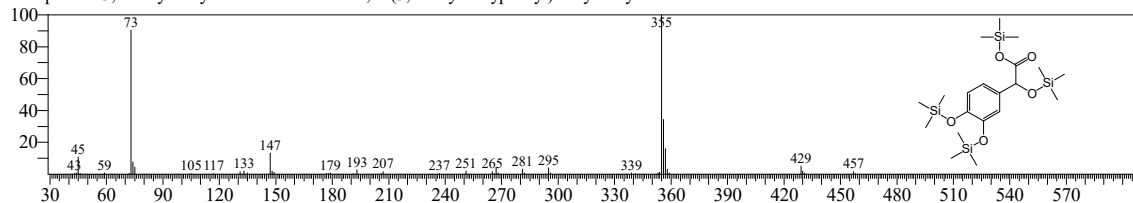

Hit#:4 Entry:310 Library:OA\_TMS\_DB5\_67min\_V3.lib

SI:37 Formula:C11H20N4OSi2 CAS:68-94-0 MolWeight:280 RetIndex:1822

CompName:Hypoxanthine-2TMS ; 3,7-dihydropurin-6-one

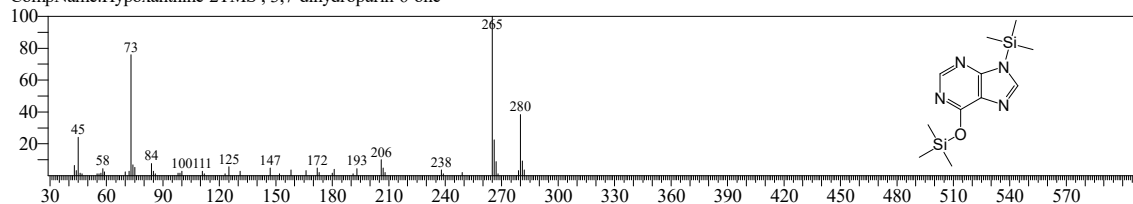

Hit#:5 Entry:203 Library:OA\_TMS\_DB5\_67min\_V3.lib

SI:35 Formula:C13H23NO2Si2 CAS:118-92-3 MolWeight:281 RetIndex:1623

CompName:Anthranilic acid-2TMS ; 2-aminobenzoic acid

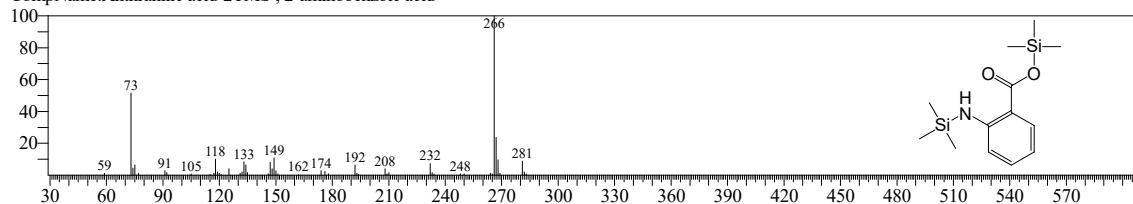

# TNAU

<< Target >>

Line#:18 R.Time:31.220(Scan#:5345) MassPeaks:300

RawMode:Averaged 31.215-31.225(5344-5346) BasePeak:207.05(2476)

BG Mode:Calc. from Peak Group 1 - Event 1 Q3 Scan

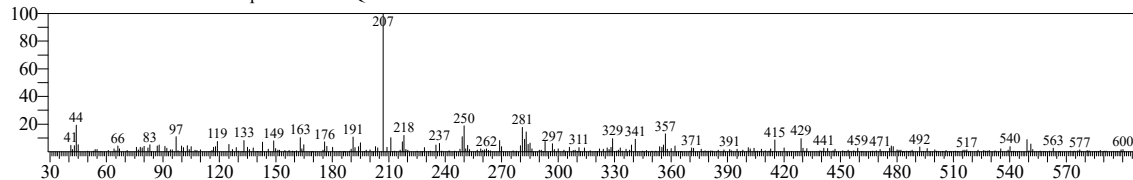

Hit#:1 Entry:413 Library:OA TMS DB5\_67min\_V3.lib

SI:29 Formula:C18H35NO3Si3 CAS:60-18-4 MolWeight:397 RetIndex:1958

CompName:Tyrosine-3TMS ; (2S)-2-amino-3-(4-hydroxyphenyl)propanoic acid

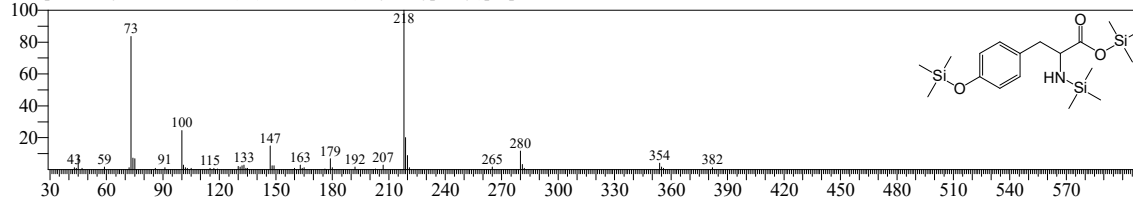

Hit#:2 Entry:469 Library:OA TMS DB5\_67min\_V3.lib

SI:28 Formula:C20H44N2O2Si4 CAS:85-87-0 MolWeight:456 RetIndex:2139

CompName:Pyridoxamine-4TMS ; 4-(aminomethyl)-5-(hydroxymethyl)-2-methylpyridin-3-ol

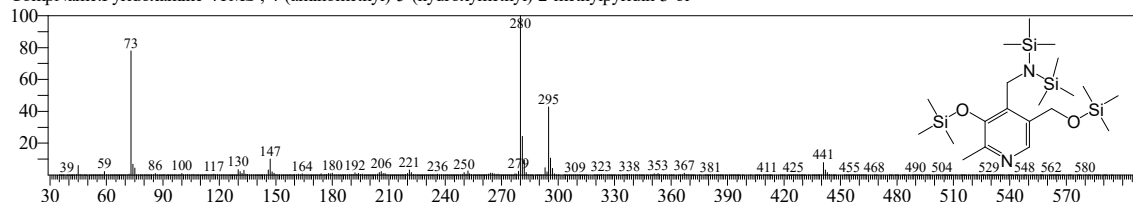

Hit#:3 Entry:463 Library:OA TMS DB5\_67min\_V3.lib

SI:26 Formula:C21H43NO4Si4 CAS:59-92-7 MolWeight:485 RetIndex:2123

CompName:Dopa-4TMS ; (2S)-2-amino-3-(3,4-dihydroxyphenyl)propanoic acid

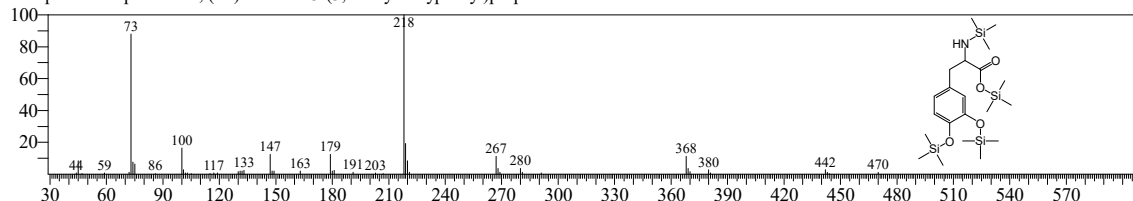

Hit#:4 Entry:476 Library:OA TMS DB5\_67min\_V3.lib

SI:25 Formula:C21H54NO8PSi5 CAS:4151-19-3 MolWeight:619 RetIndex:2152

CompName:Ribulose 5-phosphate-meto-5TMS(2) ; [(2R,3R)-2,3,5-trihydroxy-4-oxopentyl] dihydrogen phosphate

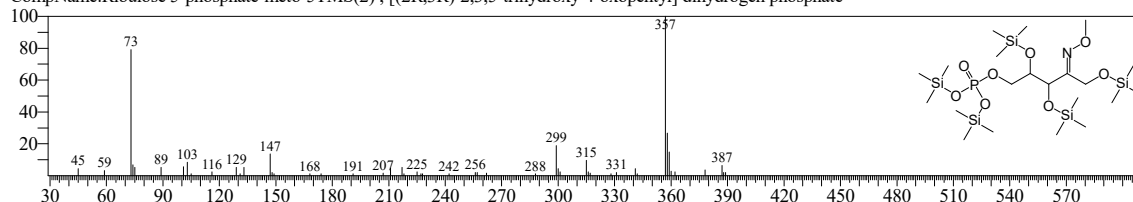

Hit#:5 Entry:394 Library:OA TMS DB5\_67min\_V3.lib

SI:25 Formula:C17H44NO7PSi4 CAS:585-18-2 MolWeight:517 RetIndex:1935

CompName:Erythrose 4-phosphate-meto-4TMS(2) ; [(2R,3R)-2,3-dihydroxy-4-oxobutyl] dihydrogen phosphate

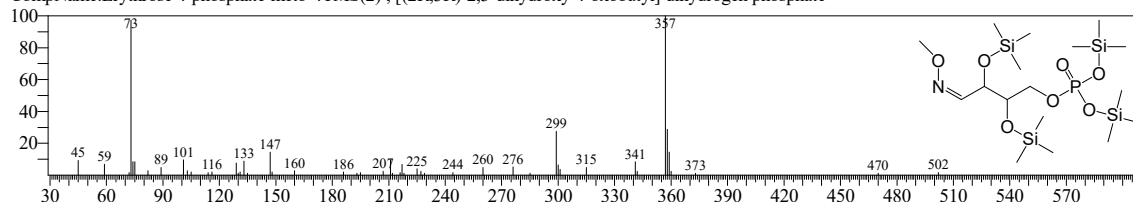

# TNAU

<< Target >>

Line#:19 R.Time:31.395(Scan#:5380) MassPeaks:297

RawMode:Averaged 31.390-31.400(5379-5381) BasePeak:281.10(1211)

BG Mode:Calc. from Peak Group 1 - Event 1 Q3 Scan

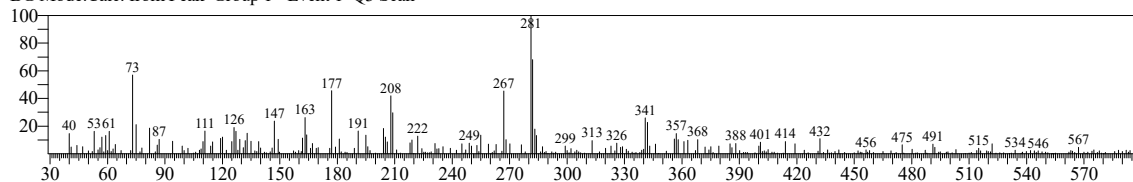

Hit#:1 Entry:328 Library:OA\_TMS\_DB5\_67min\_V3.lib

SI:41 Formula:C<sub>13</sub>H<sub>23</sub>NO<sub>2</sub>Si<sub>2</sub> CAS:150-13-0 MolWeight:281 RetIndex:1845

CompName:4-Aminobenzoic acid-2TMS ; 4-aminobenzoic acid

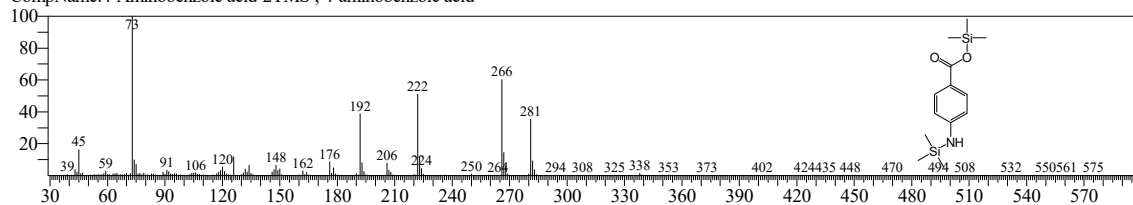

Hit#:2 Entry:179 Library:OA\_TMS\_DB5\_67min\_V3.lib

SI:39 Formula:C<sub>13</sub>H<sub>22</sub>O<sub>3</sub>Si<sub>2</sub> CAS:99-06-9 MolWeight:282 RetIndex:1572

CompName:3-Hydroxybenzoic acid-2TMS ; 3-hydroxybenzoic acid

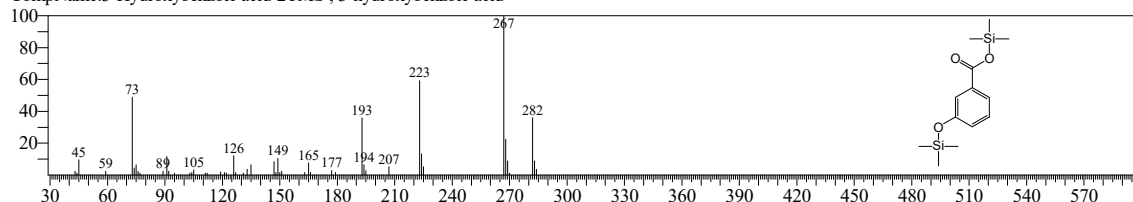

Hit#:3 Entry:341 Library:OA\_TMS\_DB5\_67min\_V3.lib

SI:39 Formula:C<sub>18</sub>H<sub>34</sub>O<sub>4</sub>Si<sub>3</sub> CAS:3247-75-4 MolWeight:398 RetIndex:1864

CompName:3-(3-Hydroxyphenyl)-3-hydroxypropionic acid-3TMS ; 3-hydroxy-3-(3-hydroxyphenyl)propanoic acid

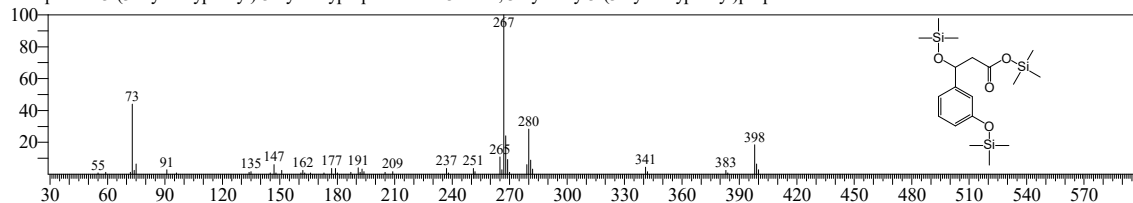

Hit#:4 Entry:211 Library:OA\_TMS\_DB5\_67min\_V3.lib

SI:39 Formula:C<sub>13</sub>H<sub>22</sub>O<sub>3</sub>Si<sub>2</sub> CAS:99-96-7 MolWeight:282 RetIndex:1636

CompName:4-Hydroxybenzoic acid-2TMS ; 4-hydroxybenzoic acid

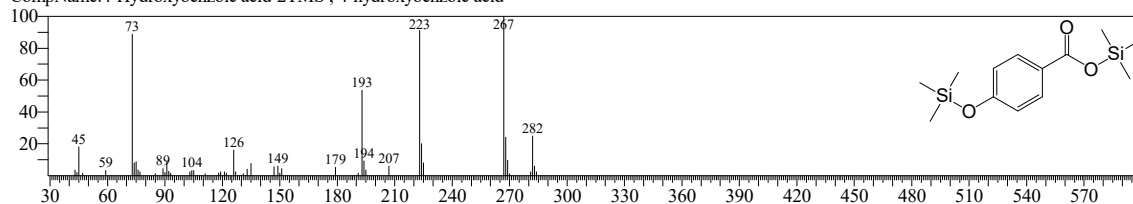

Hit#:5 Entry:200 Library:OA\_TMS\_DB5\_67min\_V3.lib

SI:38 Formula:C<sub>14</sub>H<sub>24</sub>O<sub>3</sub>Si<sub>2</sub> CAS:621-37-4 MolWeight:296 RetIndex:1617

CompName:3-Hydroxyphenylacetic acid-2TMS ; 2-(3-hydroxyphenyl)acetic acid

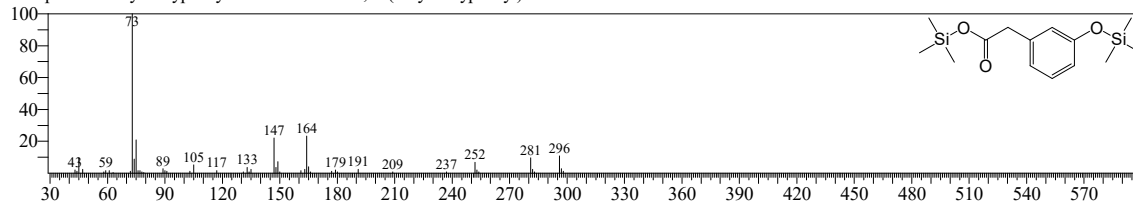

# TNAU

<< Target >>

Line#:20 R.Time:31.670(Scan#:5435) MassPeaks:267

RawMode:Averaged 31.665-31.675(5434-5436) BasePeak:207.05(1256)

BG Mode:Calc. from Peak Group 1 - Event 1 Q3 Scan

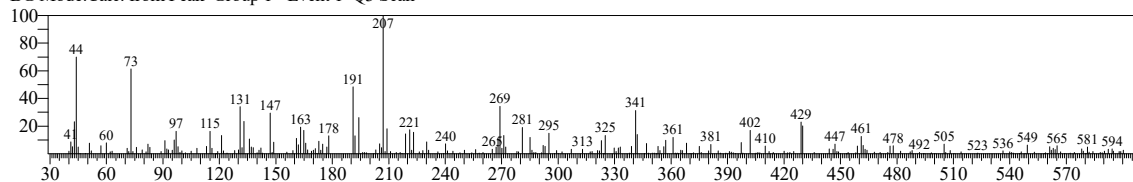

Hit#:1 Entry:10 Library:OA\_TMS\_DB5\_67min\_V3.lib

SI:36 Formula:C10H24O3Si2 CAS:594-61-6 MolWeight:248 RetIndex:1067

CompName:2-Hydroxyisobutyric acid-2TMS ; 2-hydroxy-2-methylpropanoic acid

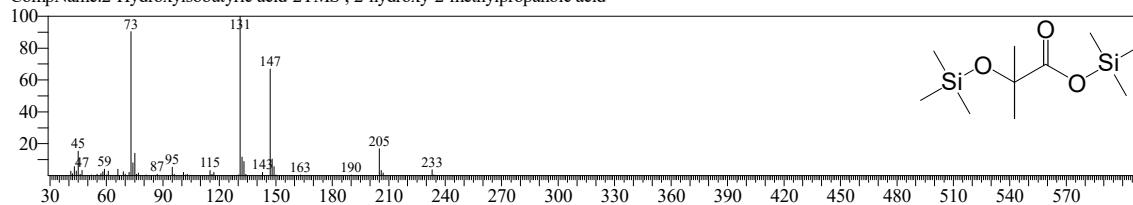

Hit#:2 Entry:384 Library:OA\_TMS\_DB5\_67min\_V3.lib

SI:34 Formula:C17H35NO3Si3 CAS:65-23-6 MolWeight:385 RetIndex:1919

CompName:Pyridoxine-3TMS ; 4,5-bis(hydroxymethyl)-2-methylpyridin-3-ol

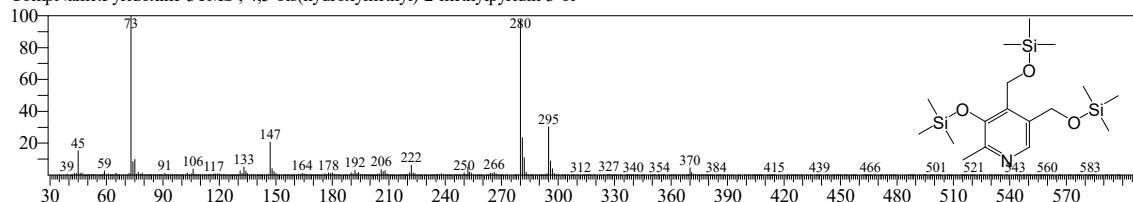

Hit#:3 Entry:461 Library:OA\_TMS\_DB5\_67min\_V3.lib

SI:34 Formula:C20H37NO4Si3 CAS:537-55-3 MolWeight:439 RetIndex:2119

CompName:N-Acetyltyrosine-3TMS ; (2S)-2-acetamido-3-(4-hydroxyphenyl)propanoic acid

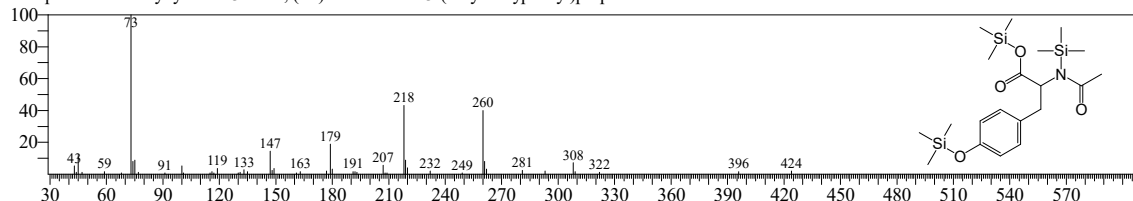

Hit#:4 Entry:194 Library:OA\_TMS\_DB5\_67min\_V3.lib

SI:34 Formula:C15H26O3Si2 CAS:828-01-3 MolWeight:310 RetIndex:1599

CompName:3-Phenyllactic acid-2TMS ; 2-hydroxy-3-phenylpropanoic acid

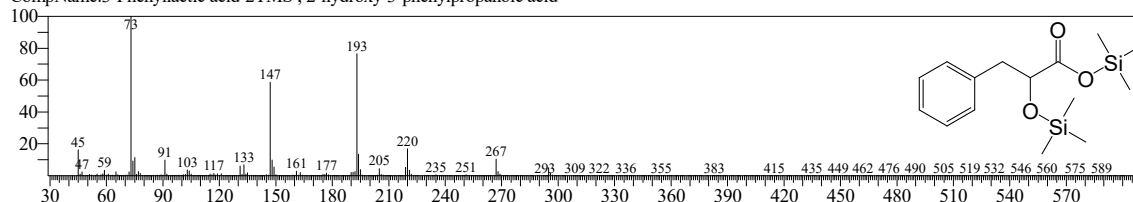

Hit#:5 Entry:77 Library:OA\_TMS\_DB5\_67min\_V3.lib

SI:34 Formula:C12H32O3Si3 CAS:56-81-5 MolWeight:308 RetIndex:1279

CompName:Glycerol-3TMS ; propane-1,2,3-triol

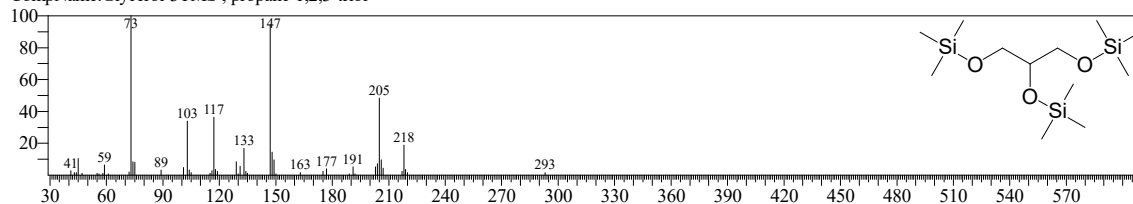

# TNAU

<< Target >>

Line#:21 R.Time:31.745(Scan#:5450) MassPeaks:276

RawMode:Averaged 31.740-31.750(5449-5451) BasePeak:133.00(537)

BG Mode:Calc. from Peak Group 1 - Event 1 Q3 Scan

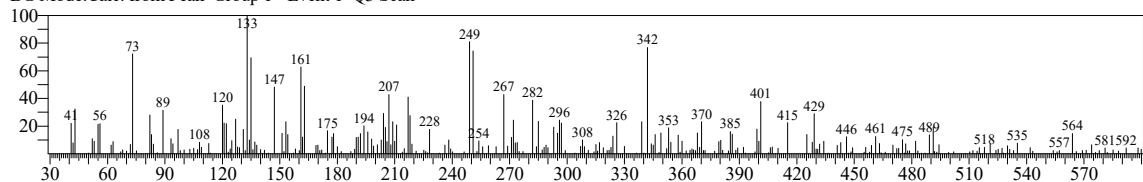

Hit#:1 Entry:77 Library:OA\_TMS\_DB5\_67min\_V3.lib

SI:33 Formula:C12H32O3Si3 CAS:56-81-5 MolWeight:308 RetIndex:1279

CompName:Glycerol-3TMS ; propane-1,2,3-triol

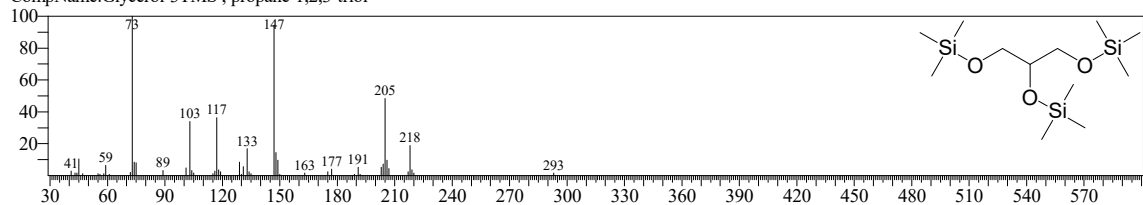

Hit#:2 Entry:511 Library:OA\_TMS\_DB5\_67min\_V3.lib

SI:31 Formula:C22H48O3Si2 CAS:506-13-8 MolWeight:416 RetIndex:2396

CompName:Juniperic acid-2TMS ; 16-hydroxyhexadecanoic acid

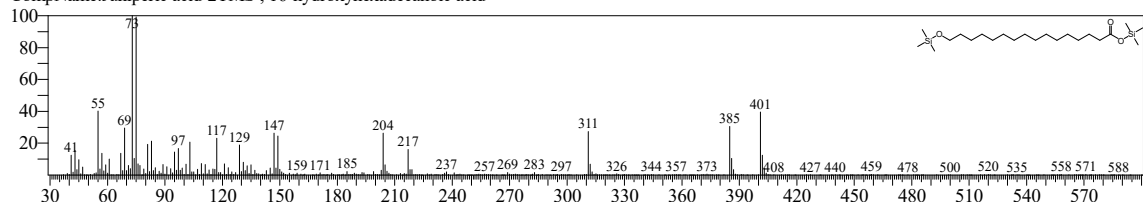

Hit#:3 Entry:294 Library:OA\_TMS\_DB5\_67min\_V3.lib

SI:31 Formula:C15H26O4Si2 CAS:306-08-1 MolWeight:326 RetIndex:1782

CompName:Homovanillic acid-2TMS ; 2-(4-hydroxy-3-methoxyphenyl)acetic acid

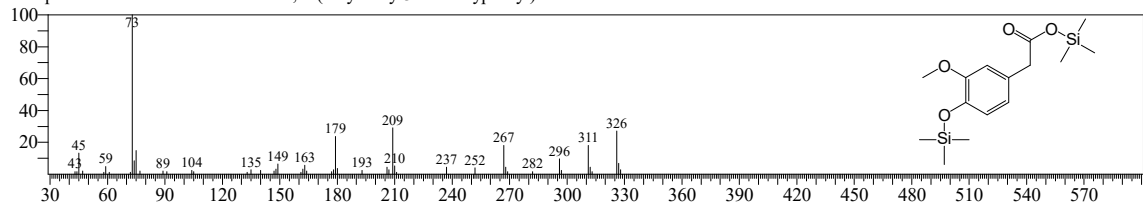

Hit#:4 Entry:539 Library:OA\_TMS\_DB5\_67min\_V3.lib

SI:31 Formula:C27H60O3Si2 CAS:544-62-7 MolWeight:488 RetIndex:2684

CompName:Batyl alcohol-2TMS ; 3-octadecoxypropane-1,2-diol

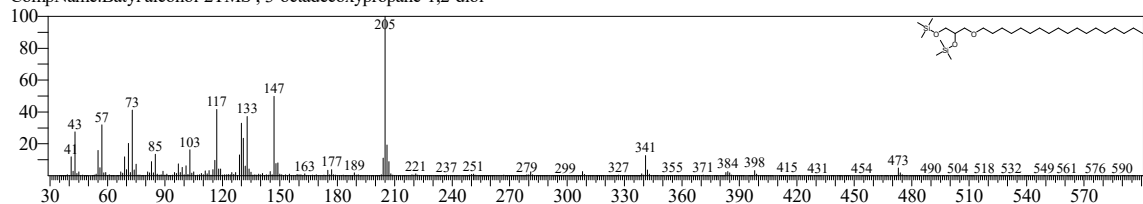

Hit#:5 Entry:306 Library:OA\_TMS\_DB5\_67min\_V3.lib

SI:31 Formula:C18H44O5Si4 CAS:154-17-6 MolWeight:452 RetIndex:1816

CompName:2-Deoxy-glucose-4TMS(2) ; (2S,4S,5S,6S)-6-(hydroxymethyl)oxane-2,4,5-triol

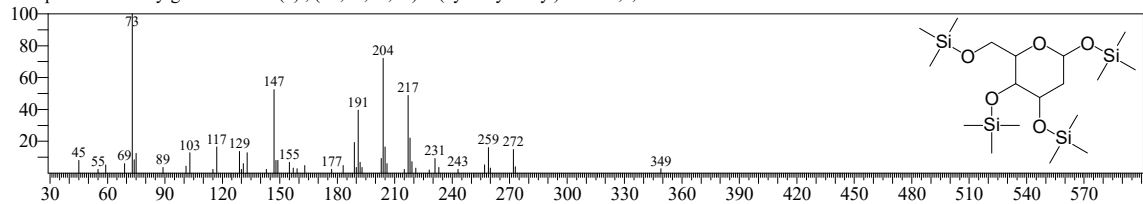

# TNAU

<< Target >>

Line#:22 R.Time:31.895(Scan#:5480) MassPeaks:342

RawMode:Averaged 31.890-31.900(5479-5481) BasePeak:139.15(2062)

BG Mode:Calc. from Peak Group 1 - Event 1 Q3 Scan

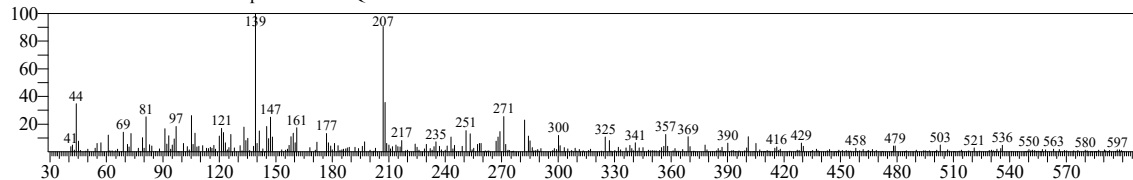

Hit#:1 Entry:534 Library:OA\_TMS\_DB5\_67min\_V3.lib

SI:34 Formula:C<sub>25</sub>H<sub>42</sub>O<sub>2</sub>Si CAS:24880-45-3 MolWeight:402 RetIndex:2591

CompName:Docosapentaenoic acid-TMS ; (7Z,10Z,13Z,16Z,19Z)-docosa-7,10,13,16,19-pentaenoic acid

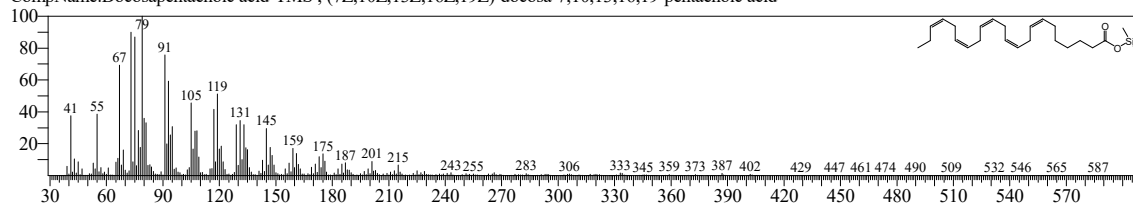

Hit#:2 Entry:179 Library:OA\_TMS\_DB5\_67min\_V3.lib

SI:34 Formula:C<sub>13</sub>H<sub>22</sub>O<sub>3</sub>Si<sub>2</sub> CAS:99-06-9 MolWeight:282 RetIndex:1572

CompName:3-Hydroxybenzoic acid-2-TMS ; 3-hydroxybenzoic acid

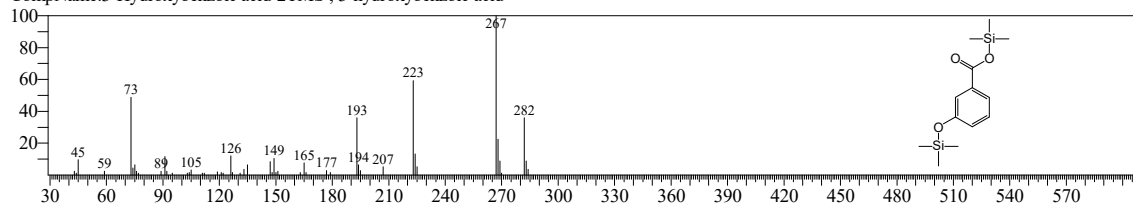

Hit#:3 Entry:36 Library:FA\_ME\_SP2560\_EI\_V3.lib

SI:33 Formula:C<sub>21</sub>H<sub>32</sub>O<sub>2</sub> CAS:10417-94-4 MolWeight:316 RetIndex:3232

CompName:Methyl cis-5,8,11,14,17-Eicosapentaenoate ; Icosa-5,8,11,14,17-pentaenoic acid

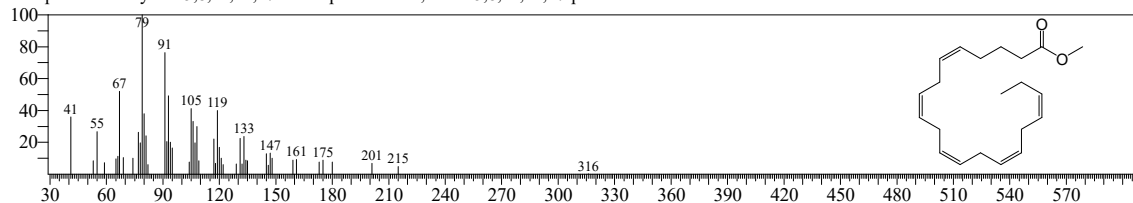

Hit#:4 Entry:533 Library:OA\_TMS\_DB5\_67min\_V3.lib

SI:33 Formula:C<sub>25</sub>H<sub>40</sub>O<sub>2</sub>Si CAS:6217-54-5 MolWeight:400 RetIndex:2576

CompName:Docosahexaenoic acid-TMS ; docosa-4,7,10,13,16,19-hexaenoic acid

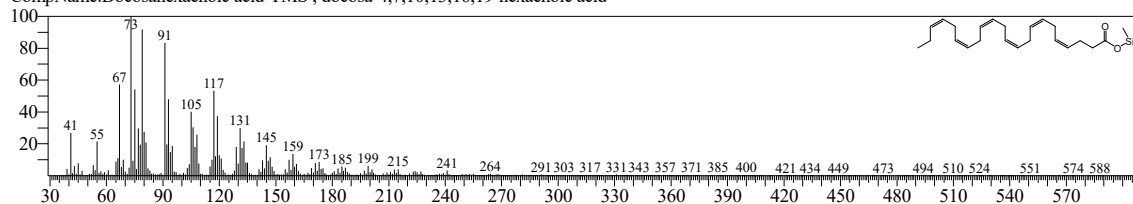

Hit#:5 Entry:211 Library:OA\_TMS\_DB5\_67min\_V3.lib

SI:32 Formula:C<sub>13</sub>H<sub>22</sub>O<sub>3</sub>Si<sub>2</sub> CAS:99-96-7 MolWeight:282 RetIndex:1636

CompName:4-Hydroxybenzoic acid-2-TMS ; 4-hydroxybenzoic acid

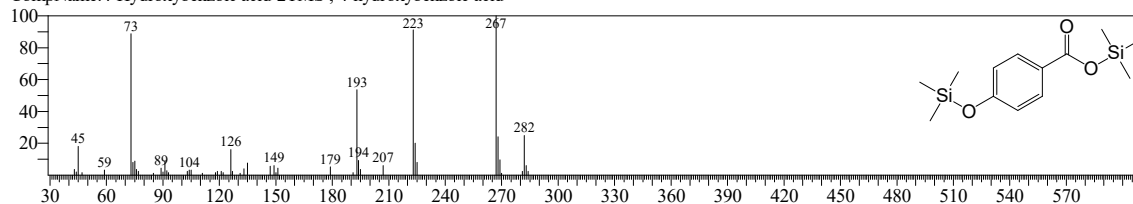



# TNAU

<< Target >>

Line#:23 R.Time:32.015(Scan#:5504) MassPeaks:276

RawMode:Averaged 32.010-32.020(5503-5505) BasePeak:207.05(932)

BG Mode:Calc. from Peak Group 1 - Event 1 Q3 Scan

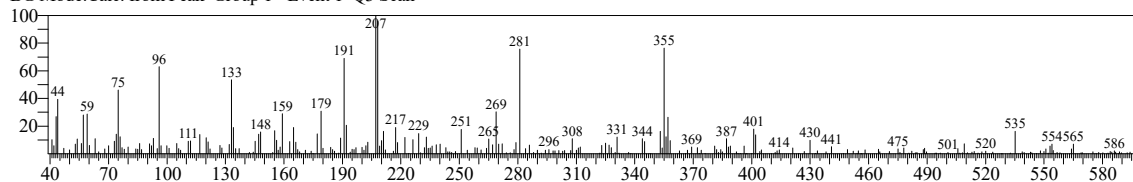

Hit#:1 Entry:402 Library:OA\_TMS\_DB5\_67min\_V3.lib

SI:37 Formula:C20H42O4Si4 CAS:775-01-9 MolWeight:458 RetIndex:1942

CompName:3,4-Dihydroxymandelic acid-4TMS ; 2-(3,4-dihydroxyphenyl)-2-hydroxyacetic acid

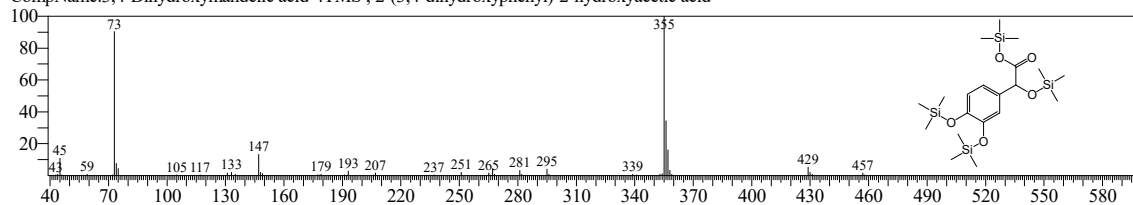

Hit#:2 Entry:382 Library:OA\_TMS\_DB5\_67min\_V3.lib

SI:31 Formula:C18H34O4Si3 CAS:6482-98-0 MolWeight:398 RetIndex:1918

CompName:4-Hydroxyphenyllactic acid-3TMS ; 2-hydroxy-3-(4-hydroxyphenyl)propanoate

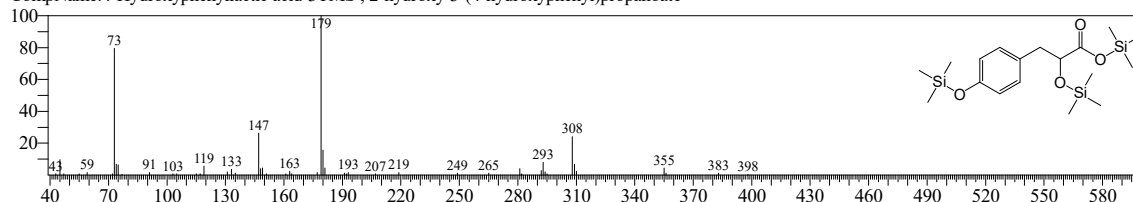

Hit#:3 Entry:35 Library:OA\_TMS\_DB5\_67min\_V3.lib

SI:29 Formula:C10H24O3Si2 CAS:300-85-6 MolWeight:248 RetIndex:1161

CompName:3-Hydroxybutyric acid-2TMS ; 3-hydroxybutanoic acid

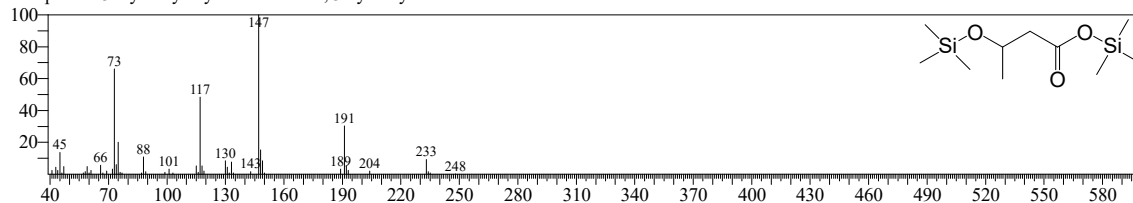

Hit#:4 Entry:25 Library:OA\_TMS\_DB5\_67min\_V3.lib

SI:26 Formula: C10H17O3Si2 CAS:0-00-0 MolWeight:251 RetIndex:1130

CompName:2-Hydroxybutyric acid-d3-2TMS ;

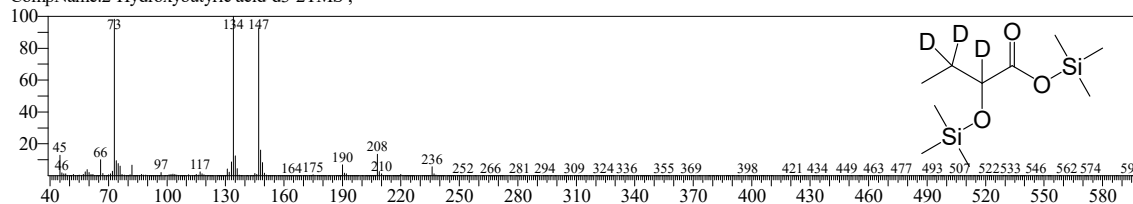

Hit#:5 Entry:474 Library:OA\_TMS\_DB5\_67min\_V3.lib

SI:25 Formula:C17H29NO4Si2 CAS:537-55-3 MolWeight:367 RetIndex:2148

CompName:N-Acetyltyrosine-2TMS ; (2S)-2-acetamido-3-(4-hydroxyphenyl)propanoic acid

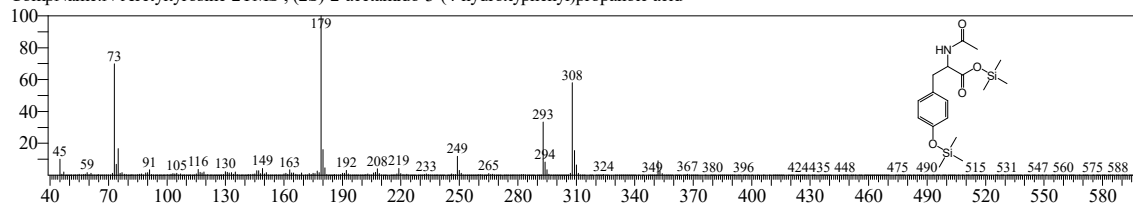

# TNAU

<< Target >>

Line#:24 R.Time:32.505(Scan#:5602) MassPeaks:299

RawMode:Averaged 32.500-32.510(5601-5603) BasePeak:73.05(782)

BG Mode:Calc. from Peak Group 1 - Event 1 Q3 Scan

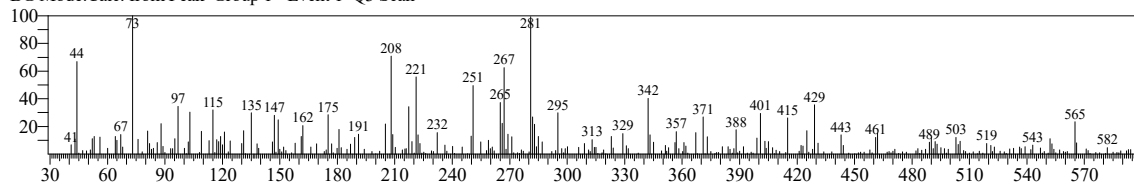

Hit#:1 Entry:384 Library:OA TMS DB5\_67min\_V3.lib

SI:35 Formula:C17H35NO3Si3 CAS:65-23-6 MolWeight:385 RetIndex:1919

CompName:Pyridoxine-3TMS ; 4,5-bis(hydroxymethyl)-2-methylpyridin-3-ol

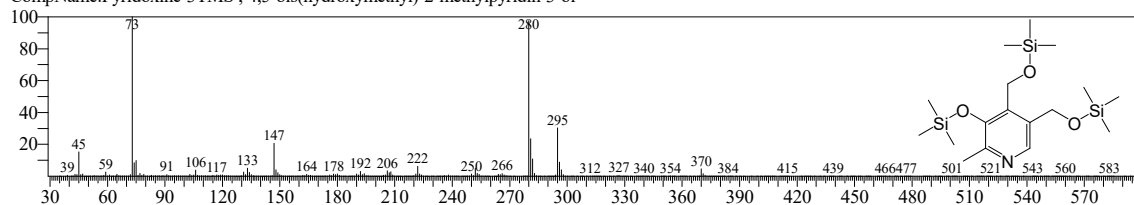

Hit#:2 Entry:328 Library:OA TMS DB5\_67min\_V3.lib

SI:34 Formula:C13H23NO2Si2 CAS:150-13-0 MolWeight:281 RetIndex:1845

CompName:4-Aminobenzoic acid-2TMS ; 4-aminobenzoic acid

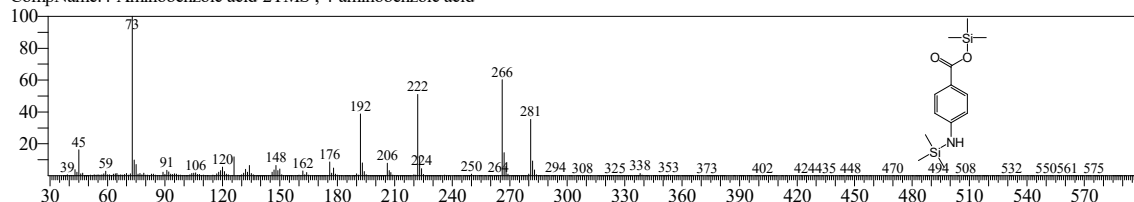

Hit#:3 Entry:195 Library:OA TMS DB5\_67min\_V3.lib

SI:34 Formula:C15H26O3Si2 CAS:529-64-6 MolWeight:310 RetIndex:1600

CompName:Tropic acid-2TMS ; 3-hydroxy-2-phenylpropanoic acid

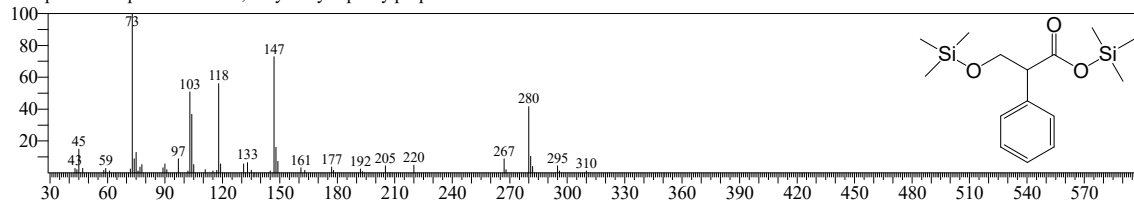

Hit#:4 Entry:203 Library:OA TMS DB5\_67min\_V3.lib

SI:34 Formula:C13H23NO2Si2 CAS:118-92-3 MolWeight:281 RetIndex:1623

CompName:Anthranilic acid-2TMS ; 2-aminobenzoic acid

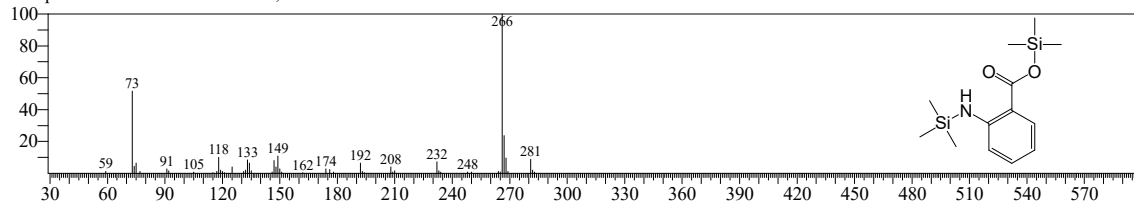

Hit#:5 Entry:438 Library:OA TMS DB5\_67min\_V3.lib

SI:32 Formula:C12H22N2O2Si2 CAS:104-98-3 MolWeight:282 RetIndex:2014

CompName:Urocanic acid-2TMS ; (E)-3-(1H-imidazol-5-yl)prop-2-enoic acid

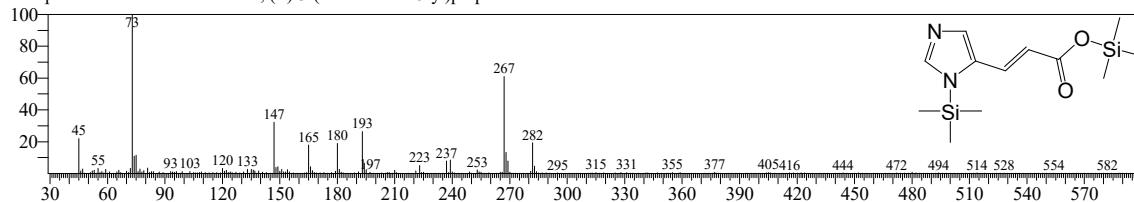

Supplement: Supplementary file 28 [file supplementary]
