# Supplementary material for: Comparative Metabolomics Profiling Reveals Key Metabolites and Associated Pathways Regulating Tuber Dormancy in White Yam (<em>Dioscorea rotundata</em>)
Source: Preprints.org preprint supplement (doi:10.20944/preprints202303.0378.v1), 2023-03-21

# TNAU

## Sample Information

Analyzed by : Admin  
 Analyzed : 05-Aug-22 2:20:51 PM  
 Sample Type : Unknown  
 Level # : 1  
 Sample Name : T Control  
 Sample ID : T Control  
 IS Amount : [1]=1  
 Sample Amount : 1  
 Dilution Factor : 1  
 Vial # : 33  
 Injection Volume : 1.00  
 Data File : D:\GCMS-8040NX\Aug 2022\Users\04.08.2022\Data files\04082022-034.qgd  
 Org Data File : D:\GCMS-8040NX\Aug 2022\Users\04.08.2022\Data files\04082022-034.qgd  
 Method File : D:\GCMS-8040NX\Aug 2022\Users\04.08.2022\Method file\27072022\_methodfile.qgm  
 Org Method File : D:\GCMS-8040NX\Aug 2022\Users\04.08.2022\Method file\27072022\_methodfile.qgm  
 Report File :  
 Tuning File : D:\GCMS-8040NX\Aug 2022\Tuning Data\TUNING 04082022.qgt  
 [Comment]  
 Jerry samples  
 Modified by : Admin  
 Modified : 05-Aug-22 4:48:38 PM

Chromatogram T Control D:\GCMS-8040NX\Aug 2022\Users\04.08.2022\Data files\04082022-034.qgd

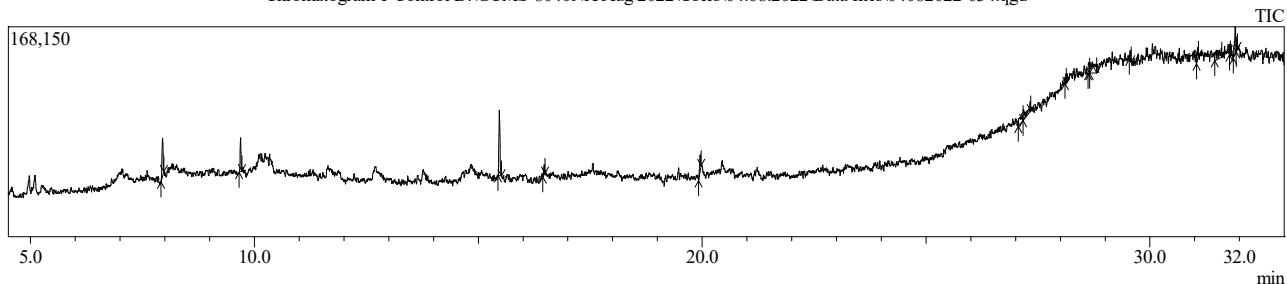

Peak Report TIC

| Peak# | R.Time | Area   | Area%  | Height | Height% | A/H  | Similarity | Name                                          |
|-------|--------|--------|--------|--------|---------|------|------------|-----------------------------------------------|
| 1     | 7.947  | 51490  | 10.87  | 30234  | 12.98   | 1.70 | 91         | Dodecane                                      |
| 2     | 9.690  | 37024  | 7.82   | 27081  | 11.63   | 1.37 | 90         | Dodecane                                      |
| 3     | 15.470 | 87902  | 18.56  | 52531  | 22.56   | 1.67 | 93         | 2,4-Di-tert-butylphenol                       |
| 4     | 16.475 | 13202  | 2.79   | 7675   | 3.30    | 1.72 | 72         | 2,2,4-Trimethyl-1,3-pentanediol diisobutyrate |
| 5     | 19.955 | 23634  | 4.99   | 12961  | 5.57    | 1.82 | 54         | Dimethylglycine-TMS                           |
| 6     | 27.070 | 26039  | 5.50   | 5388   | 2.31    | 4.83 | 32         | 3,4-Dihydroxymandelic acid-4TMS               |
| 7     | 27.325 | 39589  | 8.36   | 8003   | 3.44    | 4.95 | 35         | Epinephrine-3TMS                              |
| 8     | 28.123 | 6102   | 1.29   | 7460   | 3.20    | 0.82 | 40         | 4-Aminobenzoic acid-2TMS                      |
| 9     | 28.625 | 11890  | 2.51   | 8498   | 3.65    | 1.40 | 38         | Epinephrine-3TMS                              |
| 10    | 28.708 | 56547  | 11.94  | 8898   | 3.82    | 6.36 | 42         | 4-Aminobenzoic acid-2TMS                      |
| 11    | 29.558 | 7938   | 1.68   | 7863   | 3.38    | 1.01 | 28         | 2-Methylhippuric acid-TMS                     |
| 12    | 31.066 | 12114  | 2.56   | 9256   | 3.97    | 1.31 | 34         | Hypoxanthine-2TMS                             |
| 13    | 31.593 | 41809  | 8.83   | 7606   | 3.27    | 5.50 | 38         | 3,4-Dihydroxymandelic acid-4TMS               |
| 14    | 31.786 | 6079   | 1.28   | 8942   | 3.84    | 0.68 | 36         | 3,4-Dihydroxymandelic acid-4TMS               |
| 15    | 31.905 | 43977  | 9.28   | 21601  | 9.28    | 2.04 | 28         | 3,4-Dihydroxymandelic acid-4TMS               |
| 16    | 31.935 | 8330   | 1.76   | 8862   | 3.81    | 0.94 | 34         | 2-Hydroxyphenylacetic acid-2TMS               |
|       |        | 473666 | 100.00 | 232859 | 100.00  |      |            |                                               |

Library

# TNAU

<< Target >>

Line#:1 R.Time:7.945(Scan#:690) MassPeaks:305

RawMode:Averaged 7.940-7.950(689-691) BasePeak:43.05(6165)

BG Mode:Calc. from Peak Group 1 - Event 1 Q3 Scan

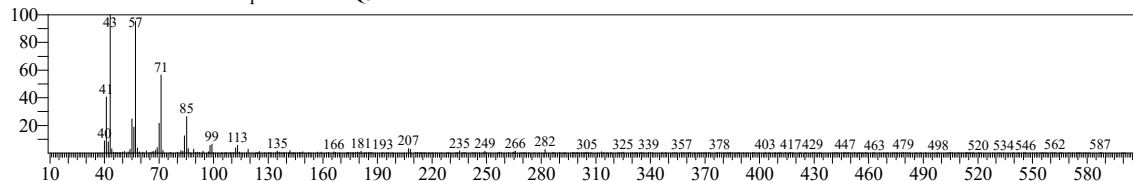

Hit#:1 Entry:16190 Library:NIST20R.lib

SI:91 Formula:C<sub>12</sub>H<sub>26</sub> CAS:112-40-3 MolWeight:170 RetIndex:1200

CompName:Dodecane \$\$ n-Dodecane \$\$ Adakane 12 \$\$ Ba 51-090453 \$\$ CH<sub>3</sub>(CH<sub>2</sub>)<sub>10</sub>CH<sub>3</sub> \$\$ Bihexyl \$\$ Dihexyl \$\$ Duodecane \$\$ NSC 8714

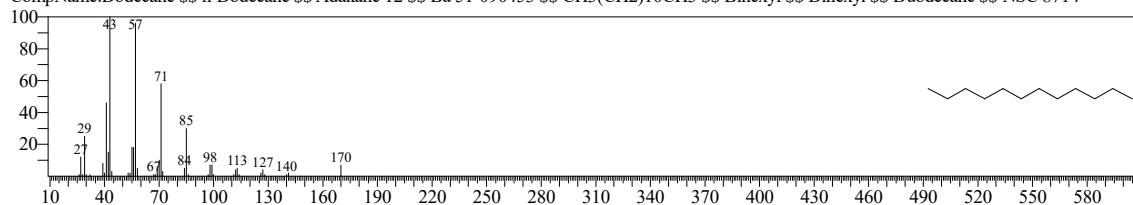

Hit#:2 Entry:12897 Library:NIST20R.lib

SI:90 Formula:C<sub>11</sub>H<sub>24</sub> CAS:1120-21-4 MolWeight:156 RetIndex:1100

CompName:Undecane \$\$ n-Undecane \$\$ Hendecane \$\$ n-C<sub>11</sub>H<sub>24</sub> \$\$ UN 2330

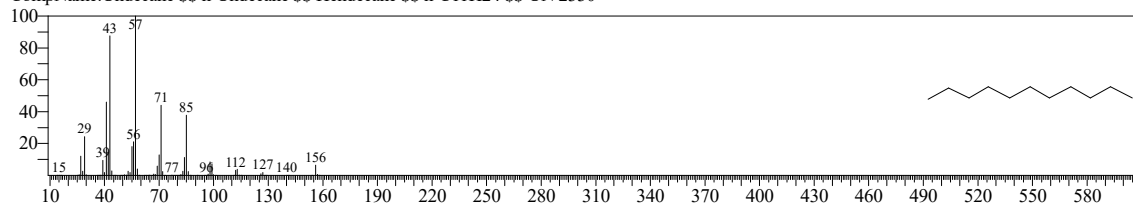

Hit#:3 Entry:27736 Library:NIST20R.lib

SI:90 Formula:C<sub>16</sub>H<sub>34</sub> CAS:544-76-3 MolWeight:226 RetIndex:1600

CompName:Hexadecane \$\$ n-Cetane \$\$ n-Hexadecane \$\$ Cetane

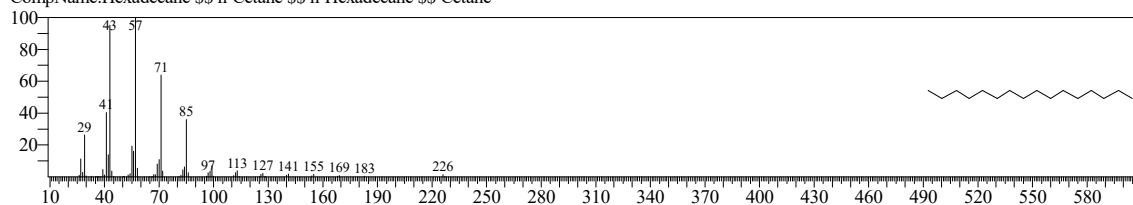

Hit#:4 Entry:40226 Library:NIST20M1.lib

SI:90 Formula:C<sub>13</sub>H<sub>28</sub> CAS:629-50-5 MolWeight:184 RetIndex:1300

CompName:Tridecane \$\$ n-Tridecane \$\$ Tridecane, n-

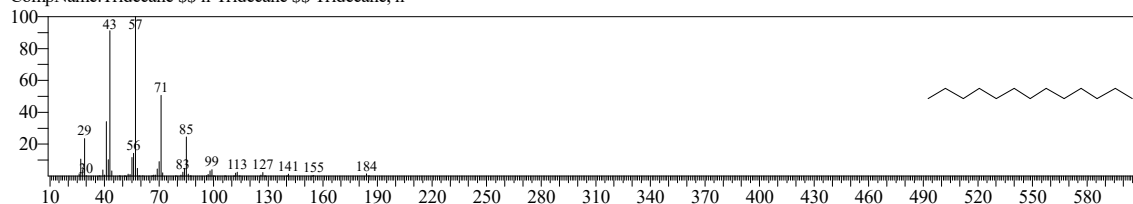

Hit#:5 Entry:159057 Library:NIST20M1.lib

SI:90 Formula:C<sub>21</sub>H<sub>44</sub> CAS:18344-37-1 MolWeight:296 RetIndex:1852

CompName:Heptadecane, 2,6,10,14-tetramethyl- \$\$ 2,6,10,14-Tetramethylheptadecane

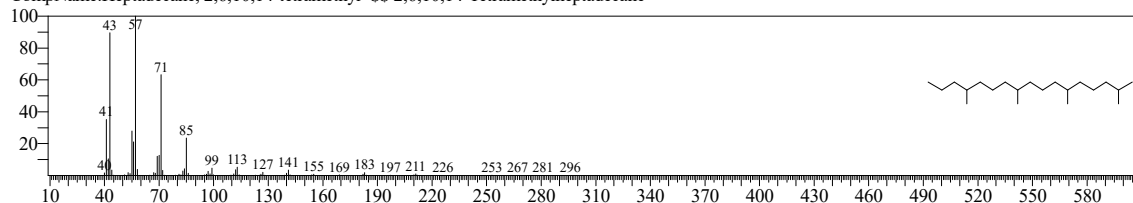

# TNAU

<< Target >>

Line# 2 R.Time: 9.690 (Scan#: 1039) MassPeaks: 260

RawMode: Averaged 9.685-9.695 (1038-1040) BasePeak: 57.10 (6372)

BG Mode: Calc. from Peak Group 1 - Event 1 Q3 Scan

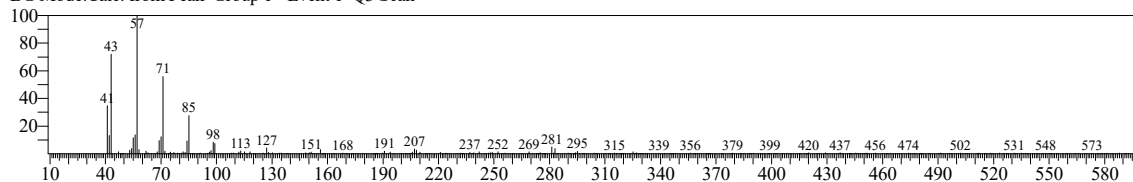

Hit#: 1 Entry: 30057 Library: NIST20M1.lib

SI: 90 Formula: C<sub>12</sub>H<sub>26</sub> CAS: 112-40-3 MolWeight: 170 RetIndex: 1200

CompName: Dodecane \$\$ n-Dodecane \$\$ Adakane 12 \$\$ Ba 51-090453 \$\$ CH<sub>3</sub>(CH<sub>2</sub>)<sub>10</sub>CH<sub>3</sub> \$\$ Bihexyl \$\$ Dihexyl \$\$ Duodecane \$\$ NSC 8714

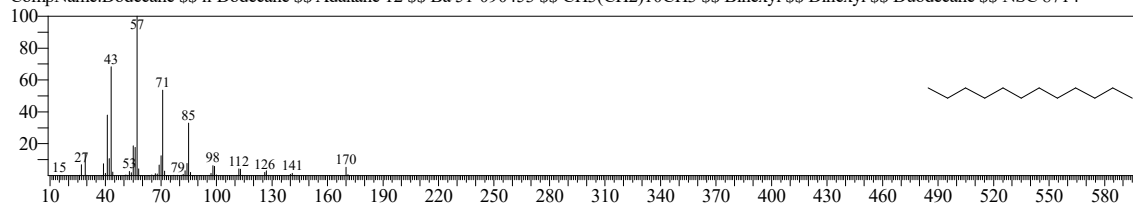

Hit#: 2 Entry: 21042 Library: NIST20M1.lib

SI: 90 Formula: C<sub>11</sub>H<sub>24</sub> CAS: 1120-21-4 MolWeight: 156 RetIndex: 1100

CompName: Undecane \$\$ n-Undecane \$\$ Hendecane \$\$ n-C<sub>11</sub>H<sub>24</sub> \$\$ UN 2330

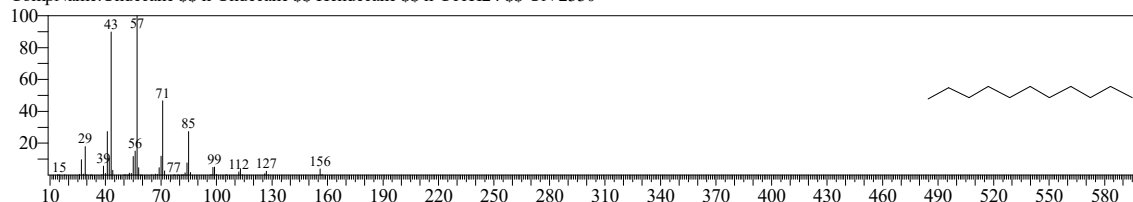

Hit#: 3 Entry: 40226 Library: NIST20M1.lib

SI: 90 Formula: C<sub>13</sub>H<sub>28</sub> CAS: 629-50-5 MolWeight: 184 RetIndex: 1300

CompName: Tridecane \$\$ n-Tridecane \$\$ Tridecane, n-

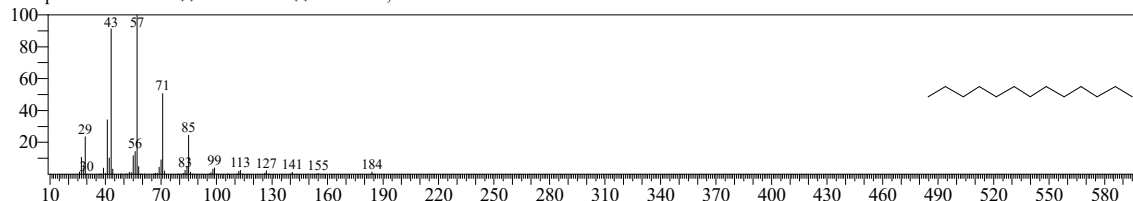

Hit#: 4 Entry: 22497 Library: NIST20R.lib

SI: 89 Formula: C<sub>14</sub>H<sub>30</sub> CAS: 629-59-4 MolWeight: 198 RetIndex: 1400

CompName: Tetradecane \$\$ n-Tetradecane

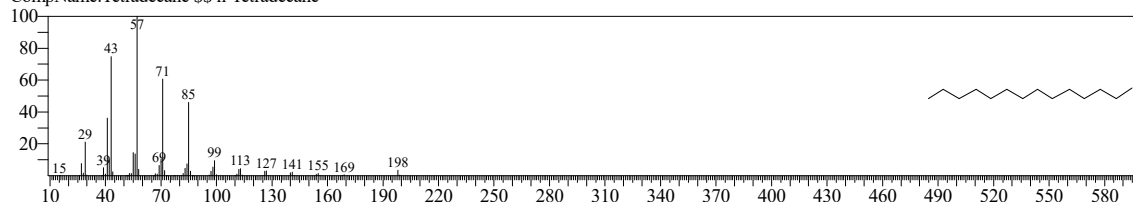

Hit#: 5 Entry: 27737 Library: NIST20R.lib

SI: 89 Formula: C<sub>16</sub>H<sub>34</sub> CAS: 544-76-3 MolWeight: 226 RetIndex: 1600

CompName: Hexadecane \$\$ n-Cetane \$\$ n-Hexadecane \$\$ Cetane

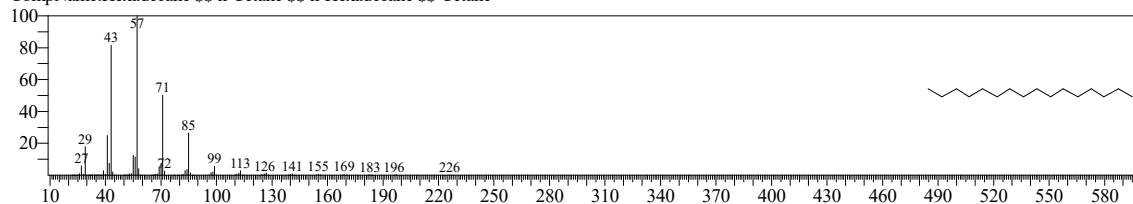

# TNAU

<< Target >>

Line#3 R.Time:15.470(Scan#:2195) MassPeaks:328

RawMode:Averaged 15.465-15.475(2194-2196) BasePeak:191.15(17010)

BG Mode:Calc. from Peak Group 1 - Event 1 Q3 Scan

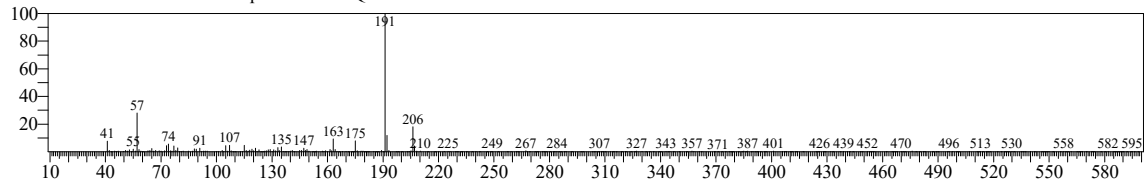

Hit#1 Entry:24088 Library:NIST20R.lib

SI:93 Formula:C14H22O CAS:96-76-4 MolWeight:206 RetIndex:1555

CompName:2,4-Di-tert-butylphenol \$\$ Phenol, 2,4-bis(1,1-dimethylethyl)- \$\$ Phenol, 2,4-di-tert-butyl- \$\$ 2,4-di-t-Butylphenol \$\$ 1-Hydroxy-2,4-di-tert-bu

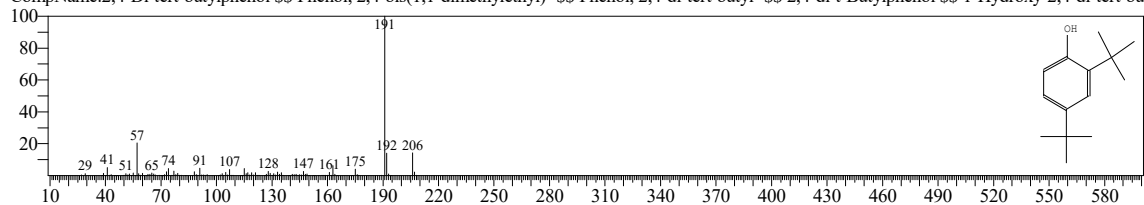

Hit#2 Entry:24110 Library:NIST20R.lib

SI:91 Formula:C14H22O CAS:1138-52-9 MolWeight:206 RetIndex:1555

CompName:Phenol, 3,5-bis(1,1-dimethylethyl)- \$\$ Phenol, 3,5-di-tert-butyl- \$\$ 3,5-Di-tert-butylphenol \$\$ Phenol, 3,5-bis(t-butyl) \$\$ 3,5-Di-t-butylphenol \$

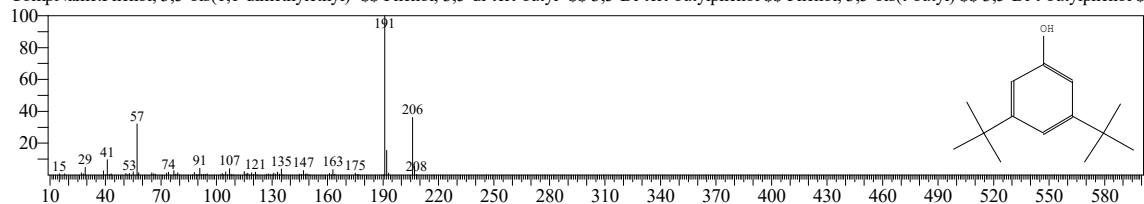

Hit#3 Entry:24098 Library:NIST20R.lib

SI:90 Formula:C14H22O CAS:5875-45-6 MolWeight:206 RetIndex:1555

CompName:Phenol, 2,5-bis(1,1-dimethylethyl)- \$\$ Phenol, 2,5-di-tert-butyl- \$\$ 2,5-Di-tert-butylphenol \$\$ 2,5-bis(1,1-Dimethylethyl)phenol

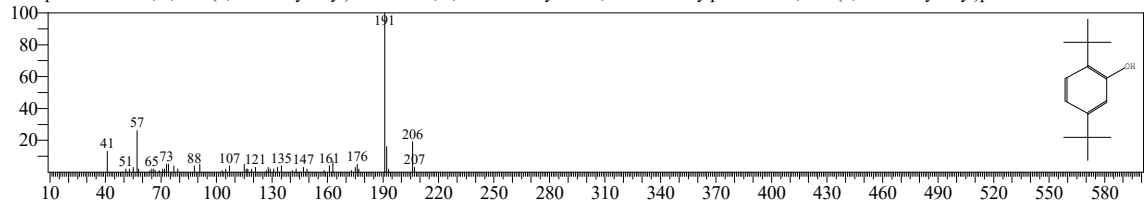

Hit#4 Entry:59031 Library:NIST20M1.lib

SI:89 Formula:C14H22O CAS:128-39-2 MolWeight:206 RetIndex:1555

CompName:Phenol, 2,6-bis(1,1-dimethylethyl)- \$\$ Phenol, 2,6-di-tert-butyl- \$\$ 2,6-Bis(tert-butyl)phenol \$\$ 2,6-Bis(1,1-dimethylethyl)phenol \$\$ 2,6-Di-tert

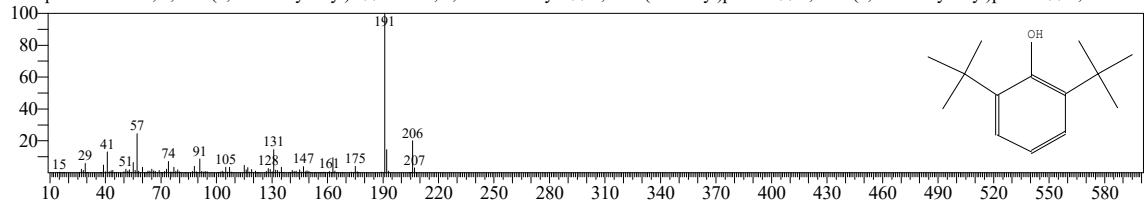

Hit#5 Entry:103047 Library:NIST20M1.lib

SI:87 Formula:C16H24O2 CAS:104316-22-5 MolWeight:248 RetIndex:1714

CompName:2,4-Di-tert-butylphenol, acetate

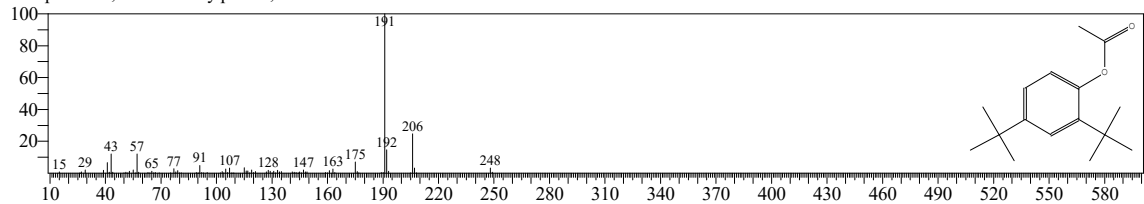

# TNAU

<< Target >>

Line#:4 R.Time:16.475(Scan#:2396) MassPeaks:297

RawMode:Averaged 16.470-16.480(2395-2397) BasePeak:71.05(2316)

BG Mode:Calc. from Peak Group 1 - Event 1 Q3 Scan

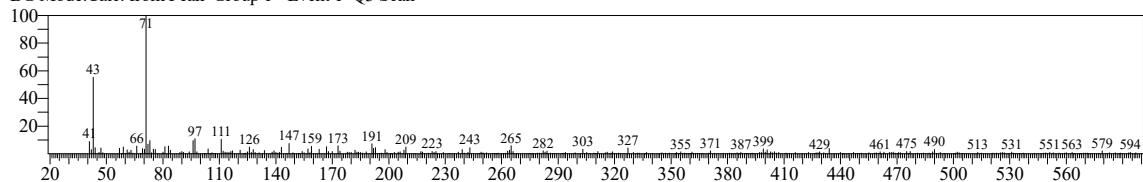

Hit#:1 Entry:34622 Library:NIST20R.lib

SI:72 Formula:C16H30O4 CAS:6846-50-0 MolWeight:286 RetIndex:1605

CompName:2,2,4-Trimethyl-1,3-pentanediol diisobutyrate \$\$ Propanoic acid, 2-methyl-, 2,2-dimethyl-1-(1-methylethyl)-1,3-propanediyl ester \$\$ 1,3-Pentan

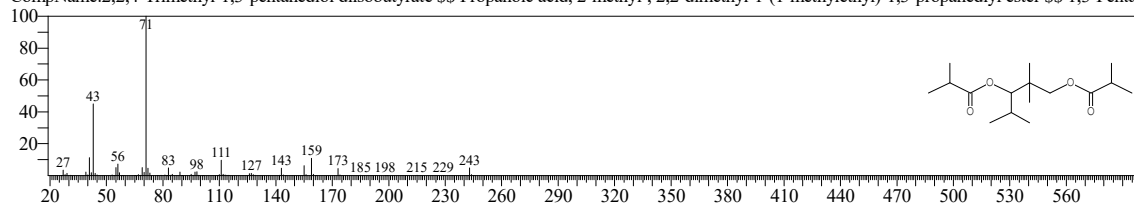

Hit#:2 Entry:146809 Library:NIST20M1.lib

SI:72 Formula:C16H30O4 CAS:0-00-0 MolWeight:286 RetIndex:1605

CompName:Pentanoic acid, 2,2,4-trimethyl-3-carboxyisopropyl, isobutyl ester \$\$ 1-Isobutyl 4-isopropyl 3-isopropyl-2,2-dimethylsuccinate #

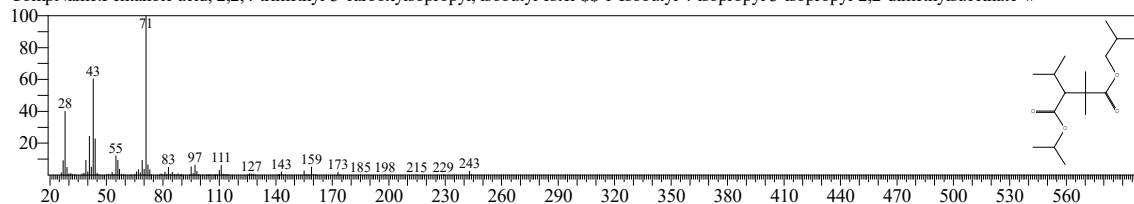

Hit#:3 Entry:1 Library:FA\_ME\_SP2560\_EI\_V3.lib

SI:52 Formula:C5H10O2 CAS:107-92-6 MolWeight:102 RetIndex:1113

CompName:Methyl butanoate ; Butanoic acid

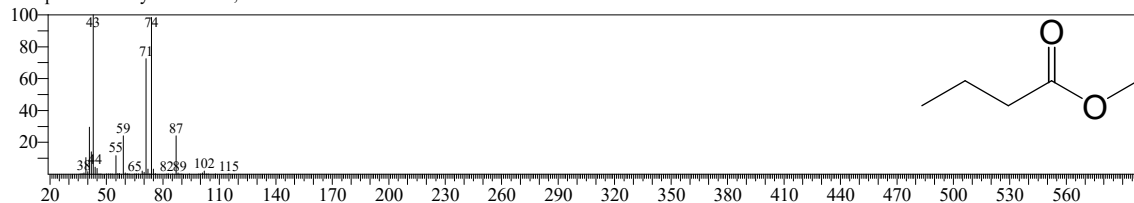

Hit#:4 Entry:477 Library:OA\_TMS\_DB5\_67min\_V3.lib

SI:49 Formula:C21H46OSi CAS:112-92-5 MolWeight:342 RetIndex:2156

CompName:Octadecanol-TMS ; octadecan-1-ol

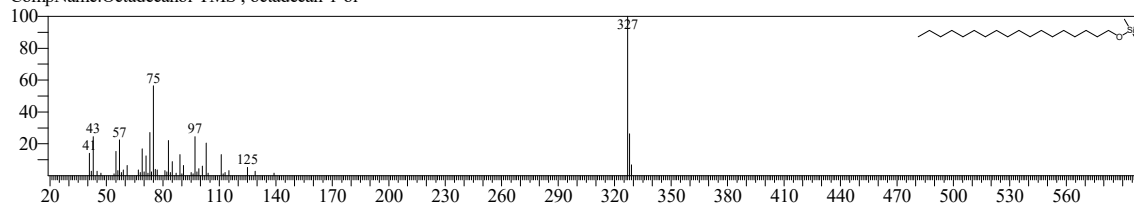

Hit#:5 Entry:11 Library:OA\_TMS\_DB5\_67min\_V3.lib

SI:43 Formula:C9H20O2Si CAS:142-62-1 MolWeight:188 RetIndex:1071

CompName:Caproic acid-TMS ; hexanoic acid

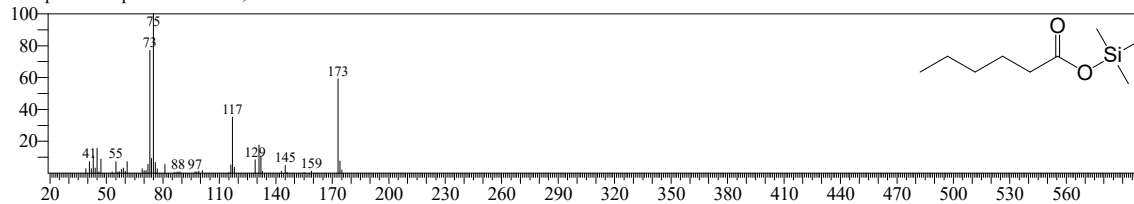

# TNAU

<< Target >>

Line#:5 R.Time:19.955(Scan#:3092) MassPeaks:315

RawMode:Averaged 19.950-19.960(3091-3093) BasePeak:58.10(2929)

BG Mode:Calc. from Peak Group 1 - Event 1 Q3 Scan

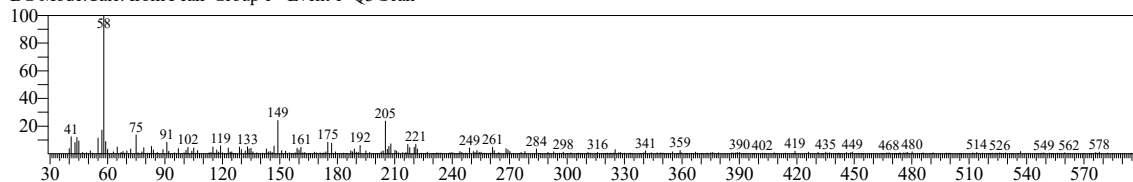

Hit#:1 Entry:1 Library:OA\_TMS\_DB5\_67min\_V3.lib

SI:54 Formula:C7H17NO2Si CAS:1118-68-9 MolWeight:175 RetIndex:990

CompName:Dimethylglycine-TMS ; 2-(dimethylamino)acetic acid

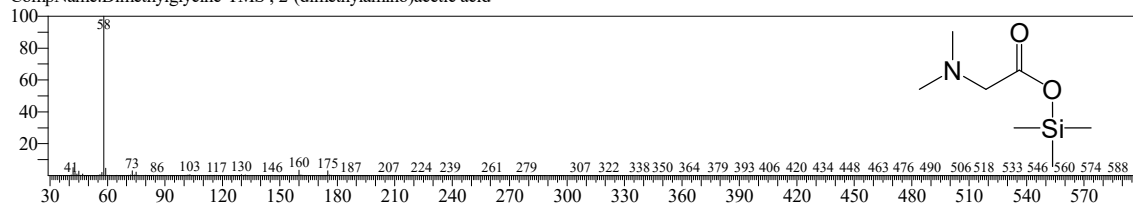

Hit#:2 Entry:80 Library:OA\_TMS\_DB5\_67min\_V3.lib

SI:45 Formula:C11H24O4Si2 CAS:601-75-2 MolWeight:276 RetIndex:1284

CompName:Ethylmalonic acid-2TMS ; 2-ethylpropanedioic acid

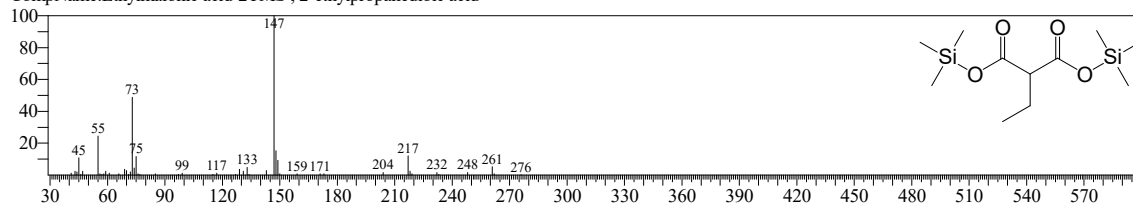

Hit#:3 Entry:95 Library:OA\_TMS\_DB5\_67min\_V3.lib

SI:44 Formula:C11H24O4Si2 CAS:498-21-5 MolWeight:276 RetIndex:1327

CompName:Methylsuccinic acid-2TMS ; 2-methylbutanedioic acid

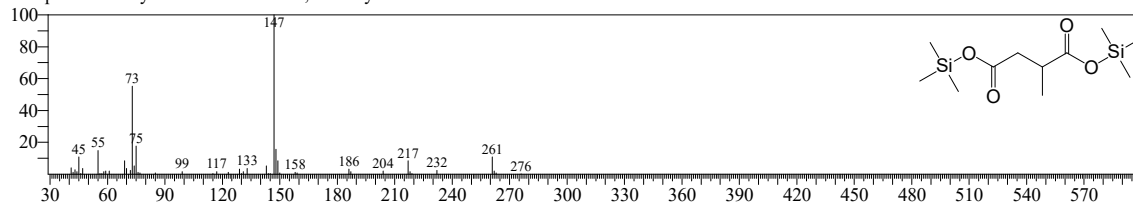

Hit#:4 Entry:13 Library:OA\_TMS\_DB5\_67min\_V3.lib

SI:43 Formula:C8H20O3Si2 CAS:79-14-1 MolWeight:220 RetIndex:1074

CompName:Glycolic acid-2TMS ; 2-hydroxyacetic acid

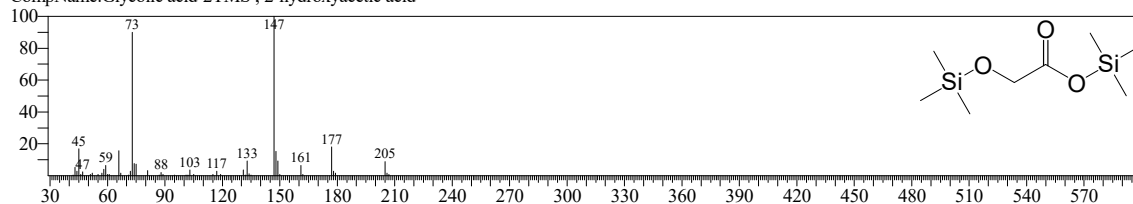

Hit#:5 Entry:115 Library:OA\_TMS\_DB5\_67min\_V3.lib

SI:43 Formula:C11H24O4Si2 CAS:110-94-1 MolWeight:276 RetIndex:1403

CompName:Glutaric acid-2TMS ; pentanedioic acid

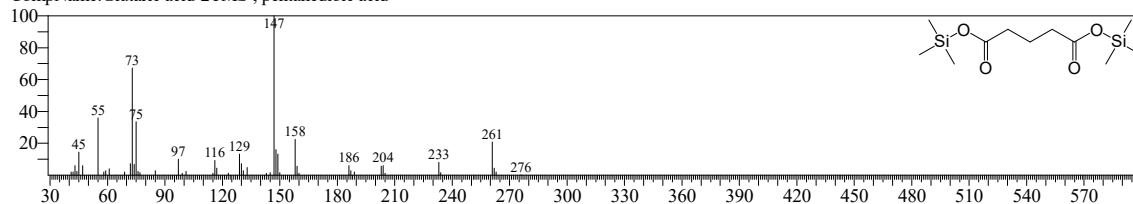

# TNAU

<< Target >>

Line#:6 R.Time:27.070(Scan#:4515) MassPeaks:302

RawMode:Averaged 27.065-27.075(4514-4516) BasePeak:282.05(527)

BG Mode:Calc. from Peak Group 1 - Event 1 Q3 Scan

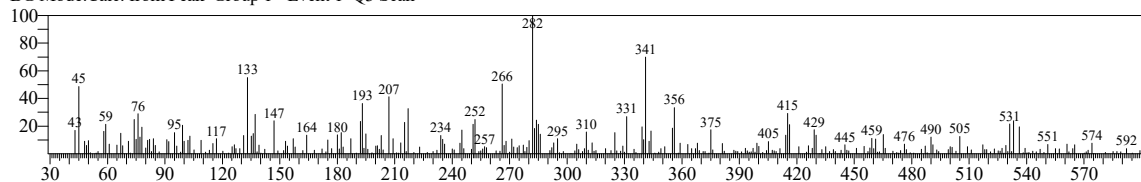

Hit#:1 Entry:402 Library:OA\_TMS\_DB5\_67min\_V3.lib

SI:32 Formula:C20H42O4Si4 CAS:775-01-9 MolWeight:458 RetIndex:1942

CompName:3,4-Dihydroxymandelic acid-4TMS ; 2-(3,4-dihydroxyphenyl)-2-hydroxyacetic acid

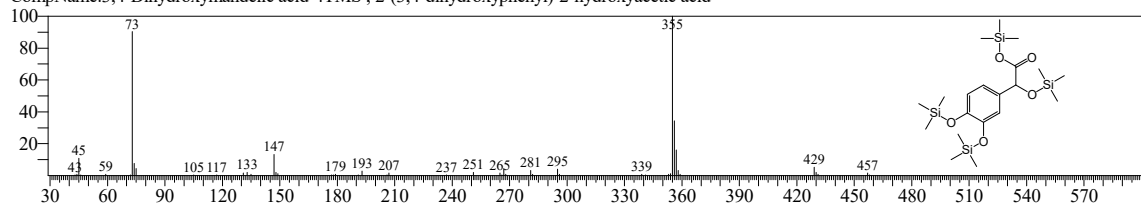

Hit#:2 Entry:315 Library:OA\_TMS\_DB5\_67min\_V3.lib

SI:26 Formula:C16H30O4Si3 CAS:99-50-3 MolWeight:370 RetIndex:1833

CompName:Protocatechuic acid-3TMS ; 3,4-dihydroxybenzoic acid

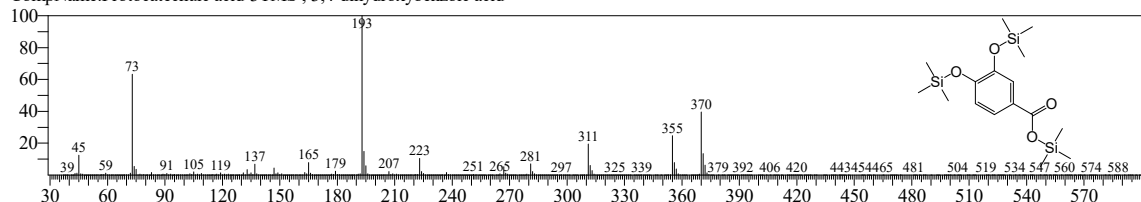

Hit#:3 Entry:272 Library:OA\_TMS\_DB5\_67min\_V3.lib

SI:23 Formula:C13H21NO4Si2 CAS:89-00-9 MolWeight:311 RetIndex:1743

CompName:Quinolinic acid-2TMS ; pyridine-2,3-dicarboxylic acid

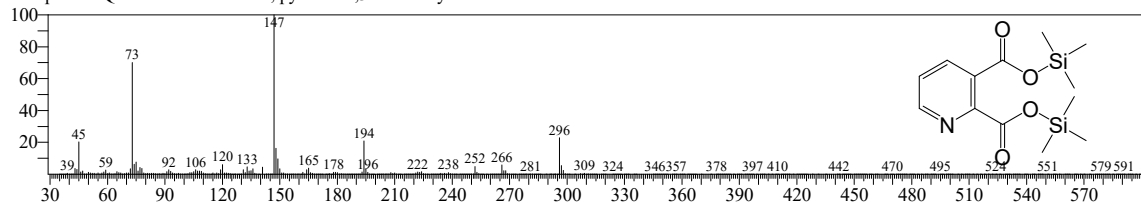

Hit#:4 Entry:84 Library:OA\_TMS\_DB5\_67min\_V3.lib

SI:22 Formula:C9H13NO2Si CAS:59-67-6 MolWeight:195 RetIndex:1300

CompName:Nicotinic acid-TMS ; pyridine-3-carboxylic acid

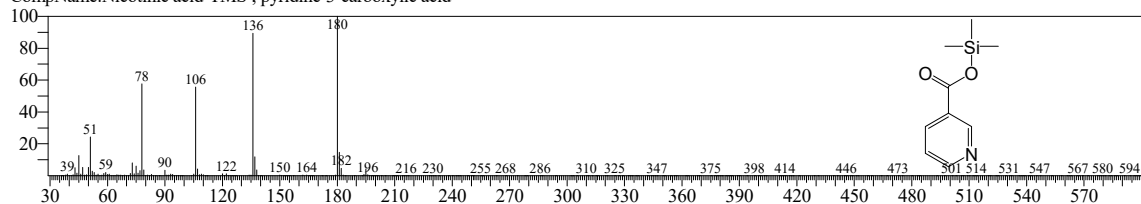

Hit#:5 Entry:203 Library:OA\_TMS\_DB5\_67min\_V3.lib

SI:21 Formula:C13H23NO2Si2 CAS:118-92-3 MolWeight:281 RetIndex:1623

CompName:Anthranilic acid-2TMS ; 2-aminobenzoic acid

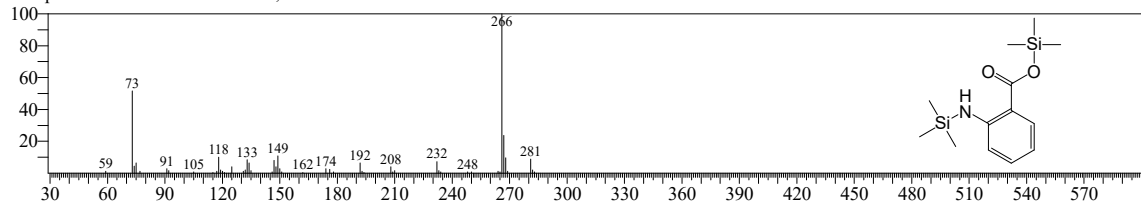

# TNAU

<< Target >>

Line#:7 R.Time:27.325(Scan#:4566) MassPeaks:319

RawMode:Averaged 27.320-27.330(4565-4567) BasePeak:281.00(947)

BG Mode:Calc. from Peak Group 1 - Event 1 Q3 Scan

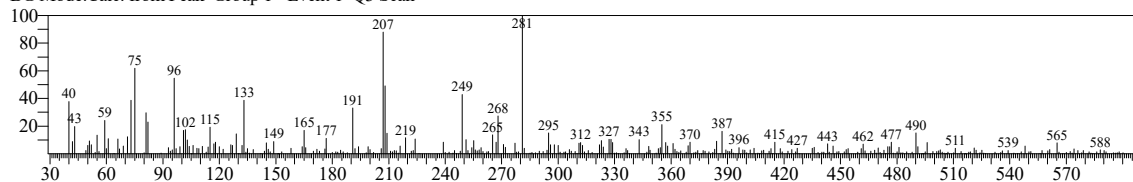

Hit#:1 Entry:343 Library:OA\_TMS\_DB5\_67min\_V3.lib

SI:35 Formula:C18H37NO3Si3 CAS:51-43-4 MolWeight:399 RetIndex:1868

CompName:Epinephrine-3TMS ; 4-[(1R)-1-hydroxy-2-(methylamino)ethyl]benzene-1,2-diol

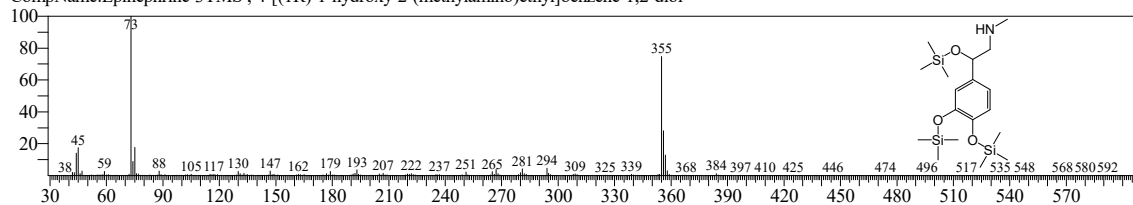

Hit#:2 Entry:528 Library:OA\_TMS\_DB5\_67min\_V3.lib

SI:34 Formula:C17H28Cl2N2O5Si2 CAS:56-75-7 MolWeight:466 RetIndex:2508

CompName:Chloramphenicol-2TMS ; 2,2-dichloro-N-[(1R,2R)-1,3-dihydroxy-1-(4-nitrophenyl)propan-2-yl]acetamide

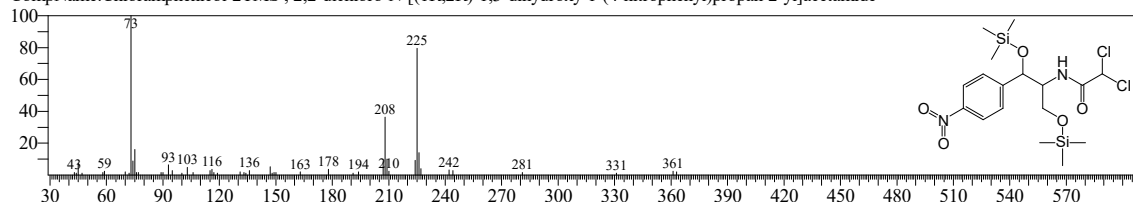

Hit#:3 Entry:477 Library:OA\_TMS\_DB5\_67min\_V3.lib

SI:34 Formula:C21H46OSi CAS:112-92-5 MolWeight:342 RetIndex:2156

CompName:Octadecanol-TMS ; octadecan-1-ol

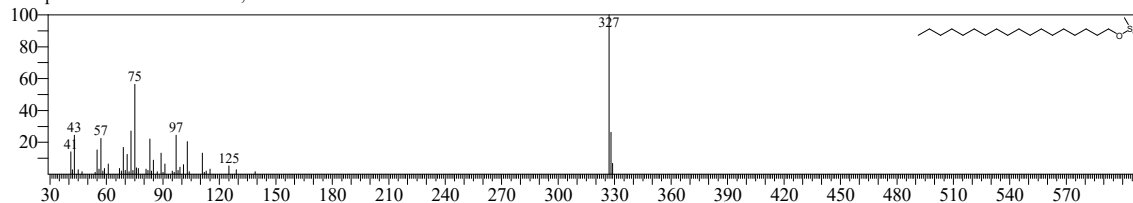

Hit#:4 Entry:156 Library:OA\_TMS\_DB5\_67min\_V3.lib

SI:33 Formula:C12H24O4Si2 CAS:4440-68-0 MolWeight:288 RetIndex:1522

CompName:2-Hexenedioic acid-2TMS ; hex-2-enedioic acid

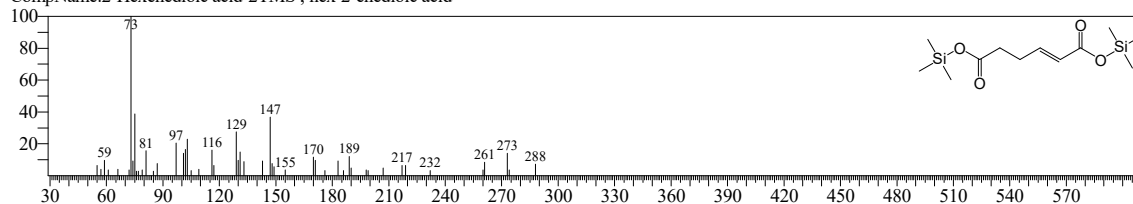

Hit#:5 Entry:402 Library:OA\_TMS\_DB5\_67min\_V3.lib

SI:32 Formula:C20H42O4Si4 CAS:775-01-9 MolWeight:458 RetIndex:1942

CompName:3,4-Dihydroxymandelic acid-4TMS ; 2-(3,4-dihydroxyphenyl)-2-hydroxyacetic acid

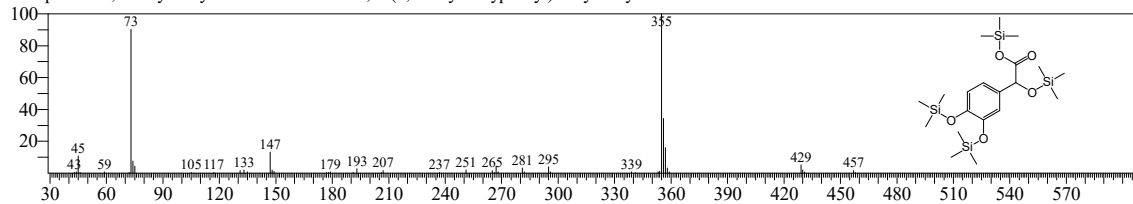



# TNAU

<< Target >>

Line#:8 R.Time:28.125(Scan#:4726) MassPeaks:275

RawMode:Averaged 28.120-28.130(4725-4727) BasePeak:73.10(704)

BG Mode:Calc. from Peak Group 1 - Event 1 Q3 Scan

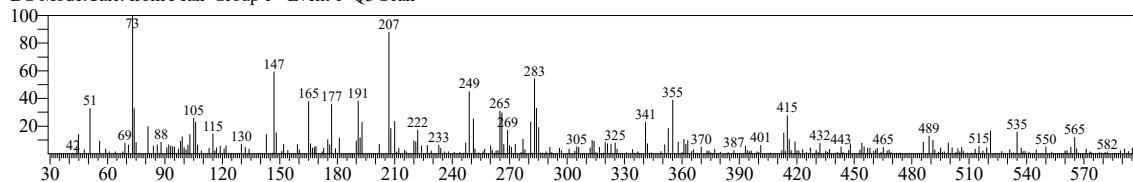

Hit#:1 Entry:328 Library:OA\_TMS\_DB5\_67min\_V3.lib

SI:40 Formula:C<sub>13</sub>H<sub>23</sub>NO<sub>2</sub>Si<sub>2</sub> CAS:150-13-0 MolWeight:281 RetIndex:1845

CompName:4-Aminobenzoic acid-2TMS ; 4-aminobenzoic acid

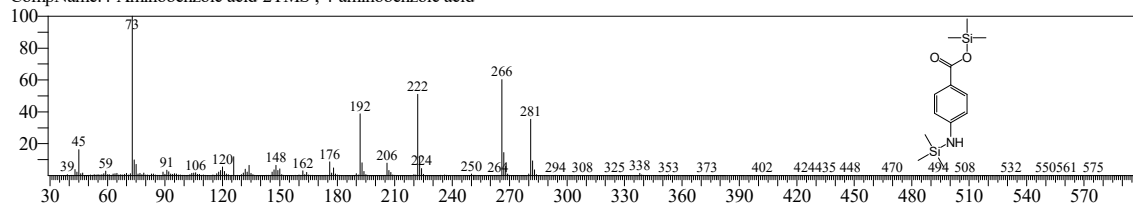

Hit#:2 Entry:143 Library:OA\_TMS\_DB5\_67min\_V3.lib

SI:40 Formula: CAS:0-00-0 MolWeight:354 RetIndex:1495

CompName:Malic acid-13C4-3TMS ;

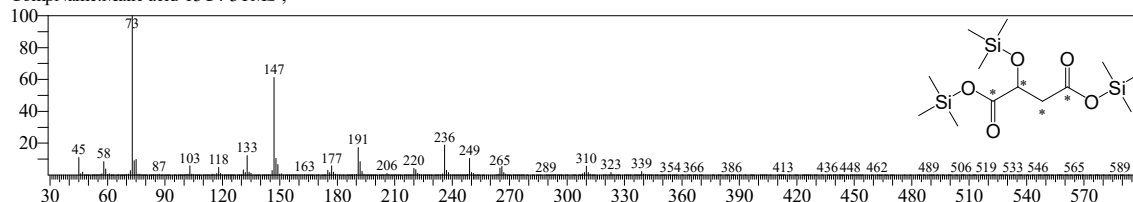

Hit#:3 Entry:402 Library:OA\_TMS\_DB5\_67min\_V3.lib

SI:39 Formula:C<sub>20</sub>H<sub>42</sub>O<sub>4</sub>Si<sub>4</sub> CAS:775-01-9 MolWeight:458 RetIndex:1942

CompName:3,4-Dihydroxymandelic acid-4TMS ; 2-(3,4-dihydroxyphenyl)-2-hydroxyacetic acid

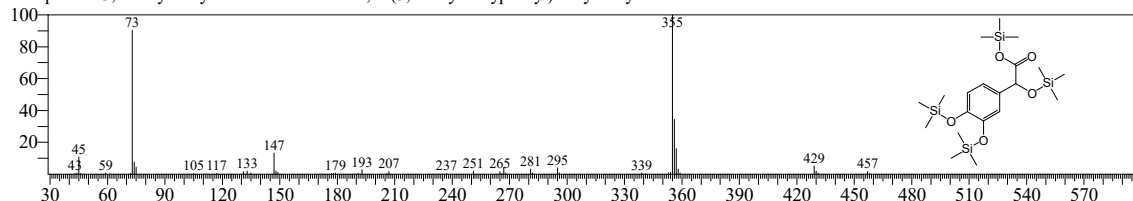

Hit#:4 Entry:343 Library:OA\_TMS\_DB5\_67min\_V3.lib

SI:38 Formula:C<sub>18</sub>H<sub>37</sub>NO<sub>3</sub>Si<sub>3</sub> CAS:51-43-4 MolWeight:399 RetIndex:1868

CompName:Epinephrine-3TMS ; 4-[(1R)-1-hydroxy-2-(methylamino)ethyl]benzene-1,2-diol

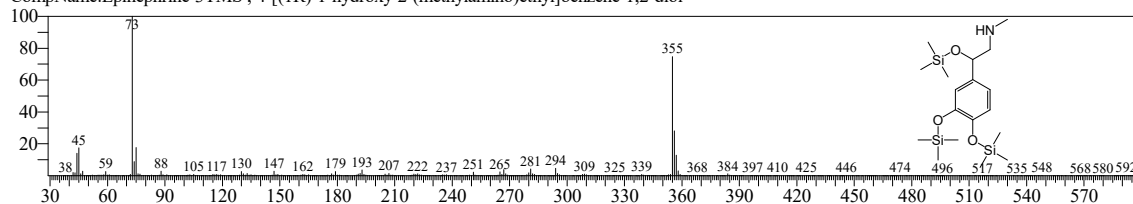

Hit#:5 Entry:194 Library:OA\_TMS\_DB5\_67min\_V3.lib

SI:37 Formula:C<sub>15</sub>H<sub>26</sub>O<sub>3</sub>Si<sub>2</sub> CAS:828-01-3 MolWeight:310 RetIndex:1599

CompName:3-Phenyllactic acid-2TMS ; 2-hydroxy-3-phenylpropanoic acid

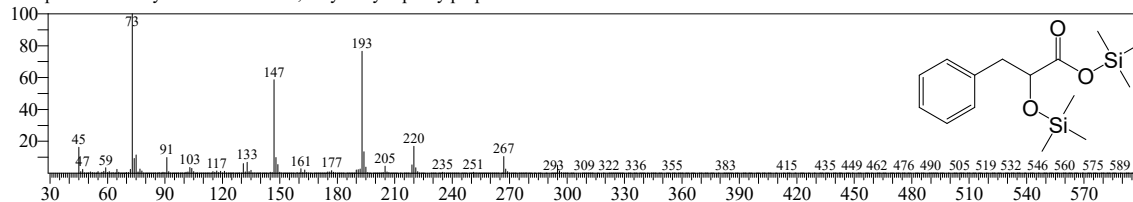

# TNAU

<< Target >>

Line#9 R.Time:28.625(Scan#:4826) MassPeaks:298

RawMode:Averaged 28.620-28.630(4825-4827) BasePeak:207.05(2342)

BG Mode:Calc. from Peak Group 1 - Event 1 Q3 Scan

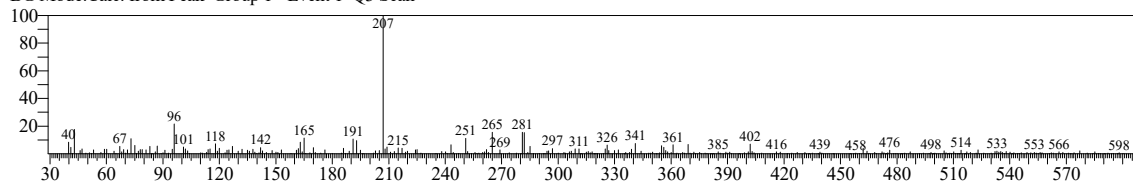

Hit#:1 Entry:343 Library:OA\_TMS\_DB5\_67min\_V3.lib

SI:38 Formula:C18H37NO3Si3 CAS:51-43-4 MolWeight:399 RetIndex:1868

CompName:Epinephrine-3TMS ; 4-[(1R)-1-hydroxy-2-(methylamino)ethyl]benzene-1,2-diol



Hit#:2 Entry:402 Library:OA\_TMS\_DB5\_67min\_V3.lib

SI:37 Formula:C20H42O4Si4 CAS:775-01-9 MolWeight:458 RetIndex:1942

CompName:3,4-Dihydroxymandelic acid-4TMS ; 2-(3,4-dihydroxyphenyl)-2-hydroxyacetic acid

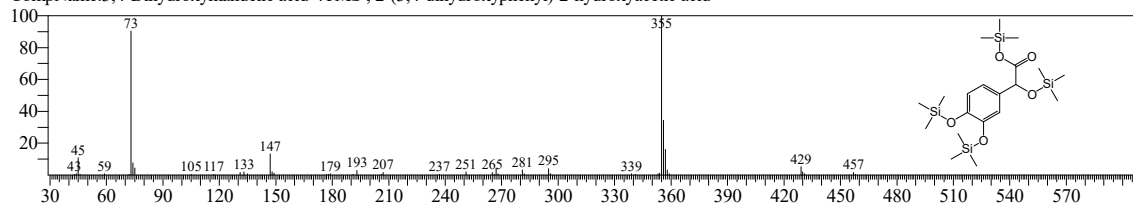

Hit#:3 Entry:315 Library:OA\_TMS\_DB5\_67min\_V3.lib

SI:35 Formula:C16H30O4Si3 CAS:99-50-3 MolWeight:370 RetIndex:1833

CompName:Protocatechuic acid-3TMS ; 3,4-dihydroxybenzoic acid

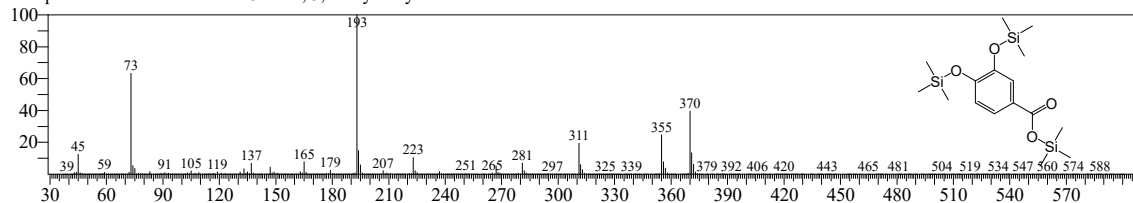

Hit#:4 Entry:310 Library:OA\_TMS\_DB5\_67min\_V3.lib

SI:33 Formula:C11H20N4OSi2 CAS:68-94-0 MolWeight:280 RetIndex:1822

CompName:Hypoxanthine-2TMS ; 3,7-dihydropurin-6-one

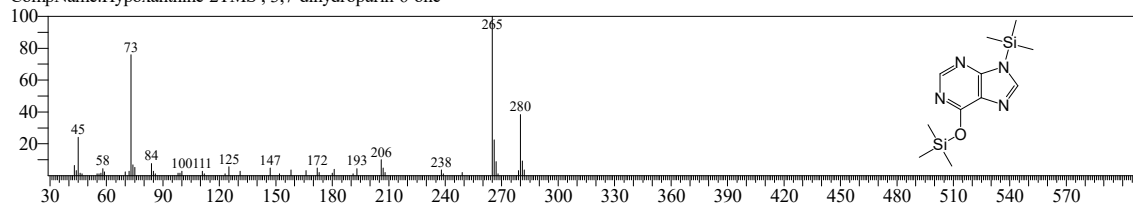

Hit#:5 Entry:290 Library:OA\_TMS\_DB5\_67min\_V3.lib

SI:33 Formula:C13H23NO3Si2 CAS:548-93-6 MolWeight:297 RetIndex:1773

CompName:3-Hydroxyanthranilic acid-2TMS ; 2-amino-3-hydroxybenzoic acid

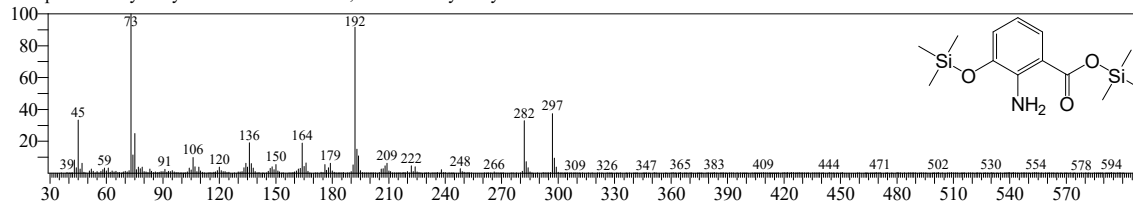

# TNAU

<< Target >>

Line#:10 R.Time:28.710(Scan#:4843) MassPeaks:258

RawMode:Averaged 28.705-28.715(4842-4844) BasePeak:207.05(1807)

BG Mode:Calc. from Peak Group 1 - Event 1 Q3 Scan

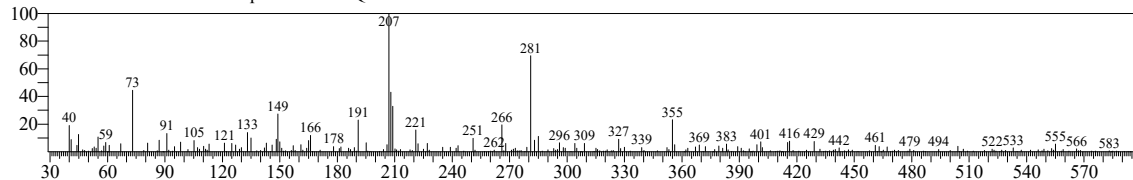

Hit#:1 Entry:328 Library:OA\_TMS\_DB5\_67min\_V3.lib

SI:42 Formula:C13H23NO2Si2 CAS:150-13-0 MolWeight:281 RetIndex:1845

CompName:4-Aminobenzoic acid-2TMS ; 4-aminobenzoic acid

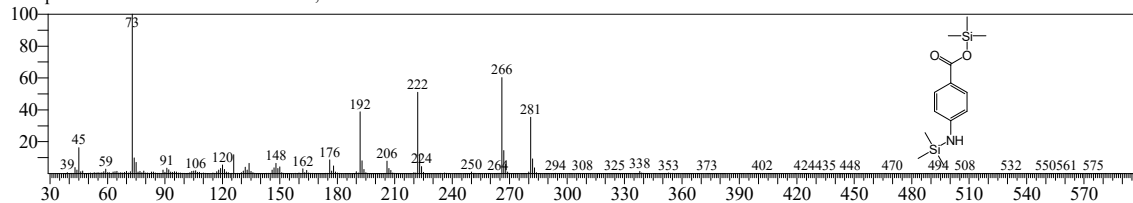

Hit#:2 Entry:402 Library:OA\_TMS\_DB5\_67min\_V3.lib

SI:41 Formula:C20H42O4Si4 CAS:775-01-9 MolWeight:458 RetIndex:1942

CompName:3,4-Dihydroxymandelic acid-4TMS ; 2-(3,4-dihydroxyphenyl)-2-hydroxyacetic acid

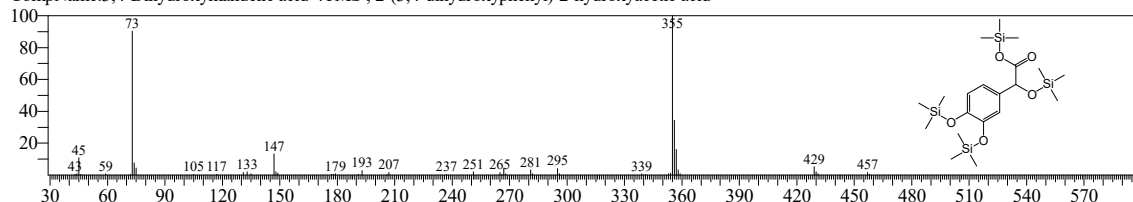

Hit#:3 Entry:203 Library:OA\_TMS\_DB5\_67min\_V3.lib

SI:38 Formula:C13H23NO2Si2 CAS:118-92-3 MolWeight:281 RetIndex:1623

CompName:Anthranilic acid-2TMS ; 2-aminobenzoic acid

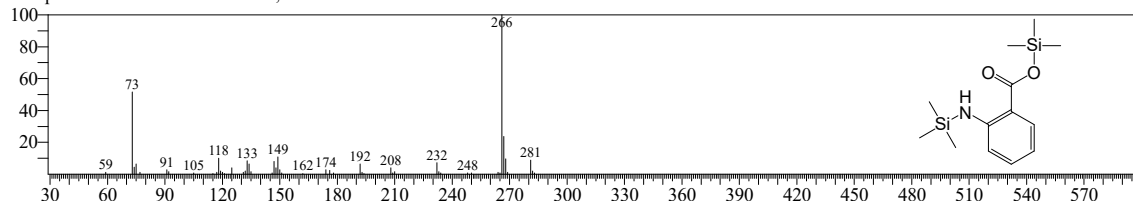

Hit#:4 Entry:343 Library:OA\_TMS\_DB5\_67min\_V3.lib

SI:38 Formula:C18H37NO3Si3 CAS:51-43-4 MolWeight:399 RetIndex:1868

CompName:Epinephrine-3TMS ; 4-[(1R)-1-hydroxy-2-(methylamino)ethyl]benzene-1,2-diol

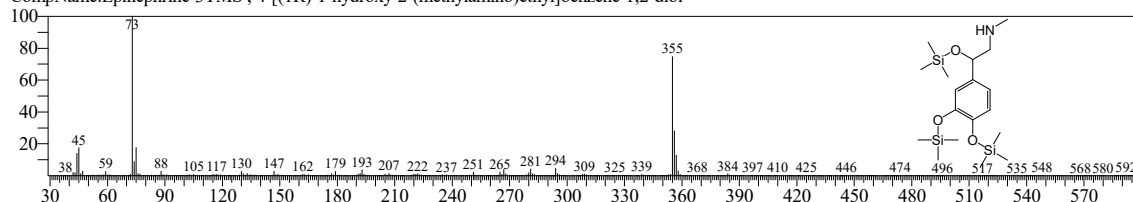

Hit#:5 Entry:528 Library:OA\_TMS\_DB5\_67min\_V3.lib

SI:37 Formula:C17H28Cl2N2O5Si2 CAS:56-75-7 MolWeight:466 RetIndex:2508

CompName:Chloramphenicol-2TMS ; 2,2-dichloro-N-[(1R,2R)-1,3-dihydroxy-1-(4-nitrophenyl)propan-2-yl]acetamide

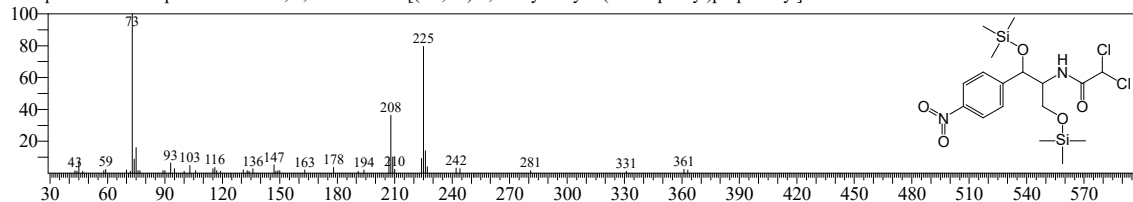

# TNAU

<< Target >>

Line#:11 R.Time:29.560(Scan#:5013) MassPeaks:318

RawMode:Averaged 29.555-29.565(5012-5014) BasePeak:281.05(1483)

BG Mode:Calc. from Peak Group 1 - Event 1 Q3 Scan

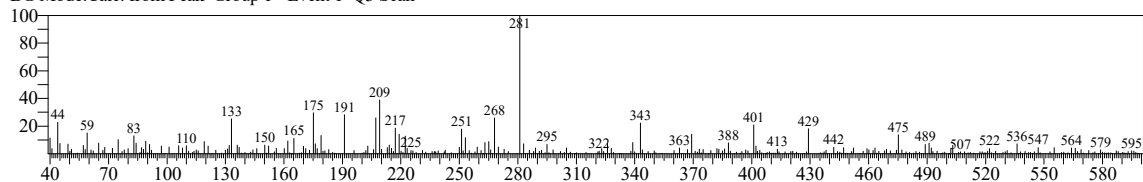

Hit#:1 Entry:365 Library:OA TMS DB5\_67min\_V3.lib

SI:28 Formula:C<sub>13</sub>H<sub>19</sub>NO<sub>3</sub>Si<sup>-</sup> CAS:42013-20-7 MolWeight:265 RetIndex:1898

CompName:2-Methylhippuric acid-TMS ; 2-[(2-methylbenzoyl)amino]acetic acid

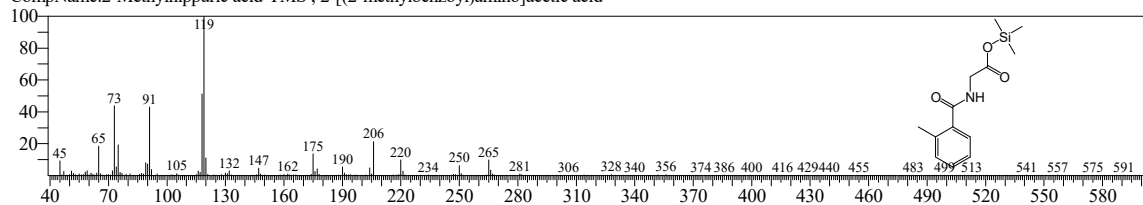

Hit#:2 Entry:138 Library:OA TMS DB5\_67min\_V3.lib

SI:24 Formula:C<sub>14</sub>H<sub>24</sub>O<sub>3</sub>Si<sub>2</sub> CAS:90-64-2 MolWeight:296 RetIndex:1486

CompName:Mandelic acid-2TMS ; 2-hydroxy-2-phenylacetic acid

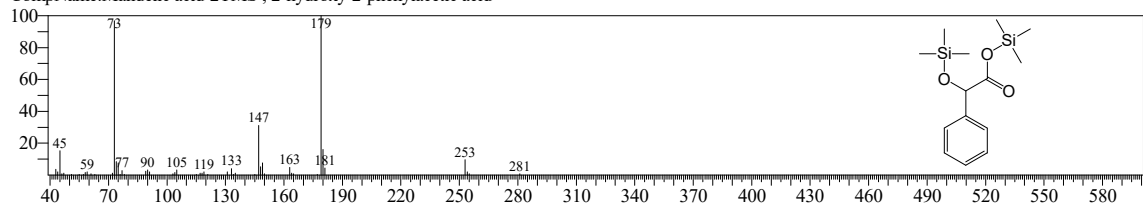

Hit#:3 Entry:382 Library:OA TMS DB5\_67min\_V3.lib

SI:24 Formula:C<sub>18</sub>H<sub>34</sub>O<sub>4</sub>Si<sub>3</sub> CAS:6482-98-0 MolWeight:398 RetIndex:1918

CompName:4-Hydroxyphenyllactic acid-3TMS ; 2-hydroxy-3-(4-hydroxyphenyl)propanoate

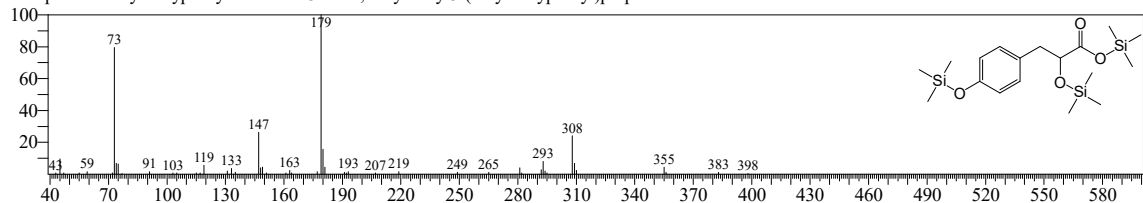

Hit#:4 Entry:310 Library:OA TMS DB5\_67min\_V3.lib

SI:23 Formula:C<sub>11</sub>H<sub>20</sub>N<sub>4</sub>O<sub>5</sub>Si<sub>2</sub> CAS:68-94-0 MolWeight:280 RetIndex:1822

CompName:Hypoxanthine-2TMS ; 3,7-dihydropurin-6-one

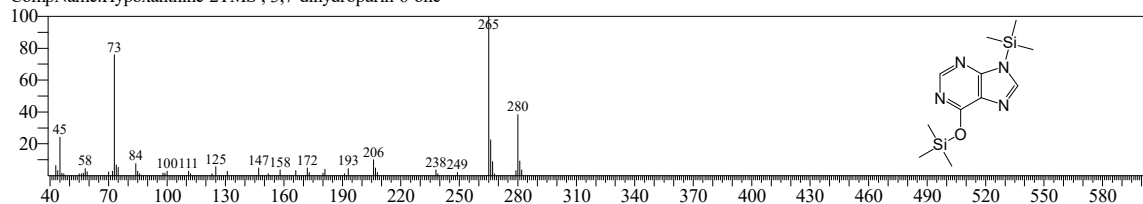

Hit#:5 Entry:142 Library:OA TMS DB5\_67min\_V3.lib

SI:23 Formula:C<sub>10</sub>H<sub>15</sub>NO<sub>2</sub>Si<sup>-</sup> CAS:118-92-3 MolWeight:209 RetIndex:1495

CompName:Anthranilic acid-TMS ; 2-aminobenzoic acid

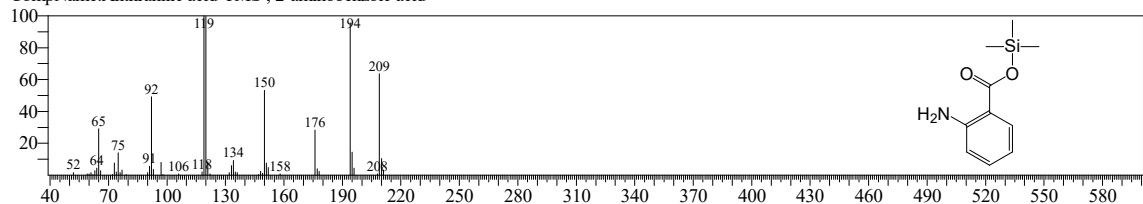

# TNAU

<< Target >>

Line#:12 R.Time:31.065(Scan#:5314) MassPeaks:288

RawMode:Averaged 31.060-31.070(5313-5315) BasePeak:207.05(1473)

BG Mode:Calc. from Peak Group 1 - Event 1 Q3 Scan

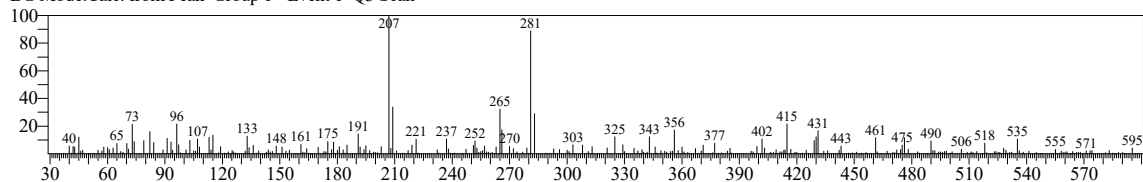

Hit#:1 Entry:310 Library:OA TMS DB5\_67min\_V3.lib

SI:34 Formula:C11H20N4OSi2 CAS:68-94-0 MolWeight:280 RetIndex:1822

CompName:Hypoxanthine-2TMS ; 3,7-dihydropurin-6-one

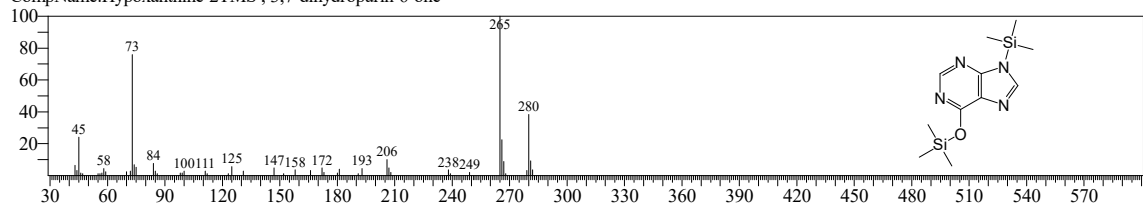

Hit#:2 Entry:328 Library:OA TMS DB5\_67min\_V3.lib

SI:32 Formula:C13H23NO2Si2 CAS:150-13-0 MolWeight:281 RetIndex:1845

CompName:4-Aminobenzoic acid-2TMS ; 4-aminobenzoic acid

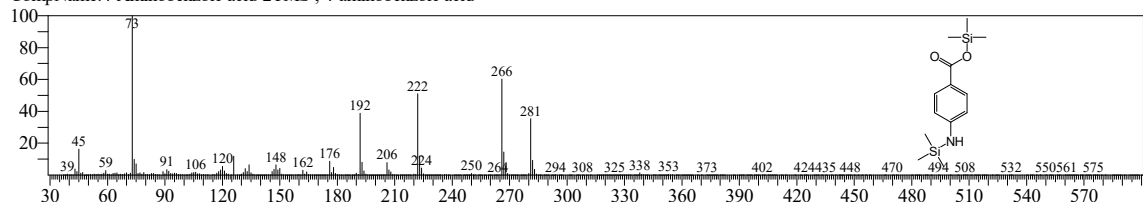

Hit#:3 Entry:384 Library:OA TMS DB5\_67min\_V3.lib

SI:31 Formula:C17H35NO3Si3 CAS:65-23-6 MolWeight:385 RetIndex:1919

CompName:Pyridoxine-3TMS ; 4,5-bis(hydroxymethyl)-2-methylpyridin-3-ol

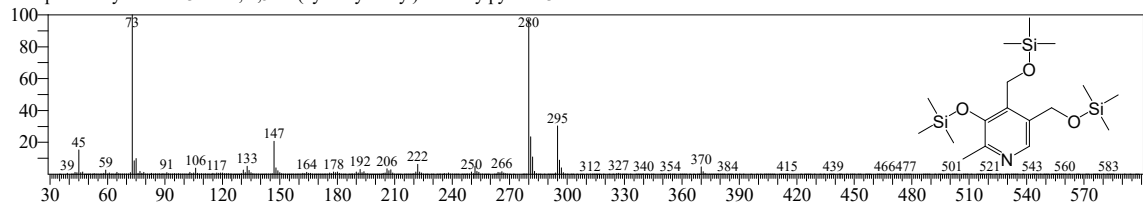

Hit#:4 Entry:535 Library:OA TMS DB5\_67min\_V3.lib

SI:31 Formula:C22H44N4O5Si4 CAS:58-63-9 MolWeight:556 RetIndex:2605

CompName:Inosine-4TMS ; 9-[(2R,3R,4S,5R)-3,4-dihydroxy-5-(hydroxymethyl)oxolan-2-yl]-3H-purin-6-one

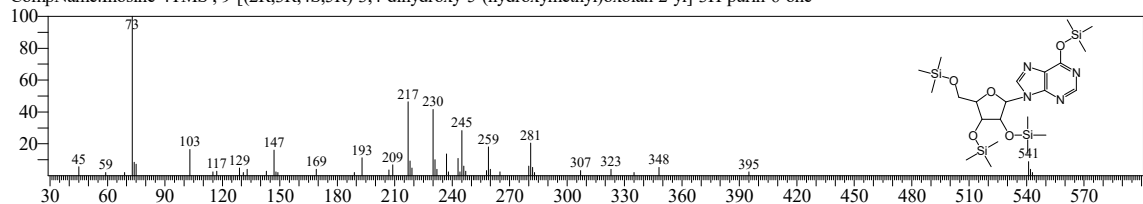

Hit#:5 Entry:395 Library:OA TMS DB5\_67min\_V3.lib

SI:30 Formula:C10H16N4O2Si CAS:58-55-9 MolWeight:252 RetIndex:1936

CompName:Theophylline-TMS ; 1,3-dimethyl-7H-purine-2,6-dione

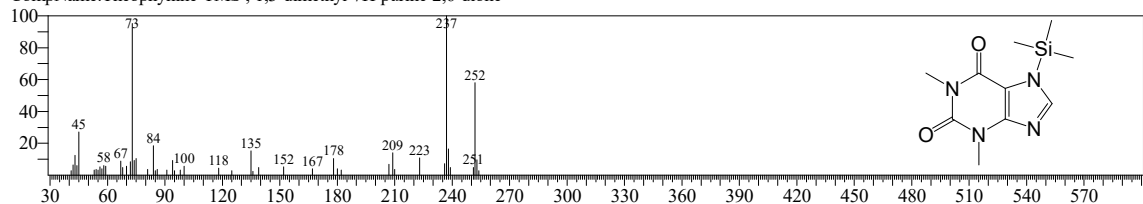

<< Target >>

Line#:13 R.Time:31.595(Scan#:5420) MassPeaks:308

RawMode:Averaged 31.590-31.600(5419-5421) BasePeak:355.10(727)

BG Mode:Calc. from Peak Group 1 - Event 1 Q3 Scan

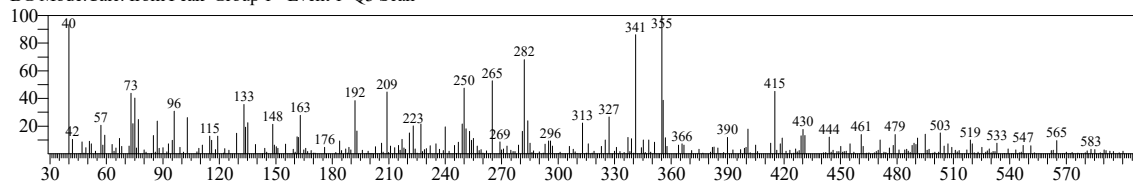

Hit#:1 Entry:402 Library:OA\_TMS\_DB5\_67min\_V3.lib

SI:38 Formula:C20H42O4Si4 CAS:775-01-9 MolWeight:458 RetIndex:1942

CompName:3,4-Dihydroxymandelic acid-4TMS ; 2-(3,4-dihydroxyphenyl)-2-hydroxyacetic acid

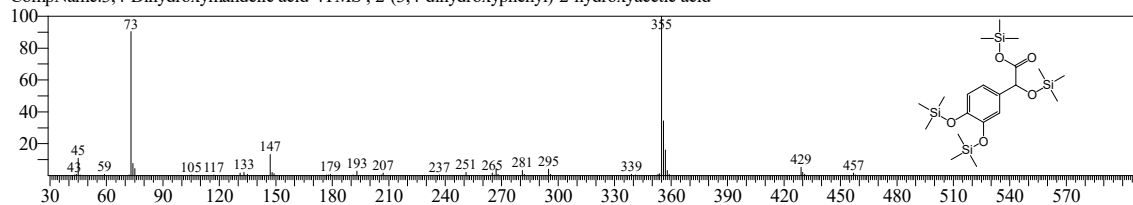

Hit#:2 Entry:343 Library:OA\_TMS\_DB5\_67min\_V3.lib

SI:33 Formula:C18H37NO3Si3 CAS:51-43-4 MolWeight:399 RetIndex:1868

CompName:Epinephrine-3TMS ; 4-[(1R)-1-hydroxy-2-(methylamino)ethyl]benzene-1,2-diol

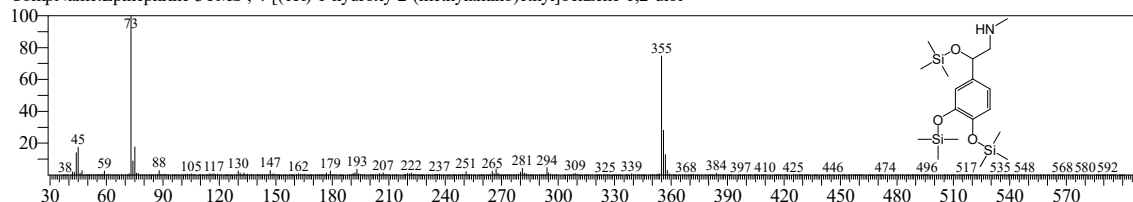

Hit#:3 Entry:290 Library:OA\_TMS\_DB5\_67min\_V3.lib

SI:30 Formula:C13H23NO3Si2 CAS:548-93-6 MolWeight:297 RetIndex:1773

CompName:3-Hydroxyanthranilic acid-2TMS ; 2-amino-3-hydroxybenzoic acid

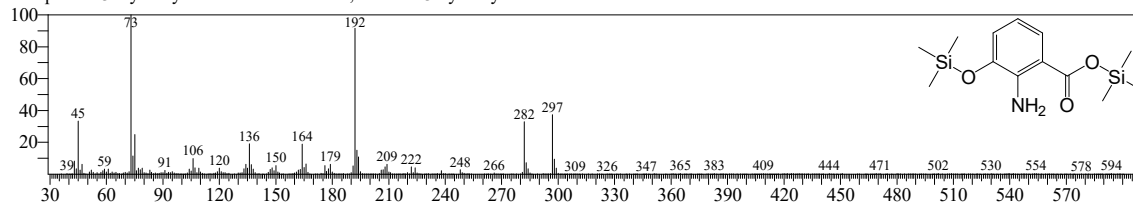

Hit#:4 Entry:315 Library:OA\_TMS\_DB5\_67min\_V3.lib

SI:29 Formula:C16H30O4Si3 CAS:99-50-3 MolWeight:370 RetIndex:1833

CompName:Protocatechuic acid-3TMS ; 3,4-dihydroxybenzoic acid

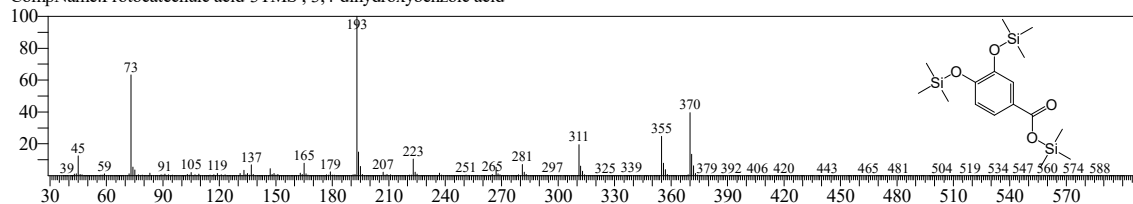

Hit#:5 Entry:100 Library:OA\_TMS\_DB5\_67min\_V3.lib

SI:27 Formula: CAS:0-00-0 MolWeight:264 RetIndex:1346

CompName:Fumaric acid-13C4-2TMS ;

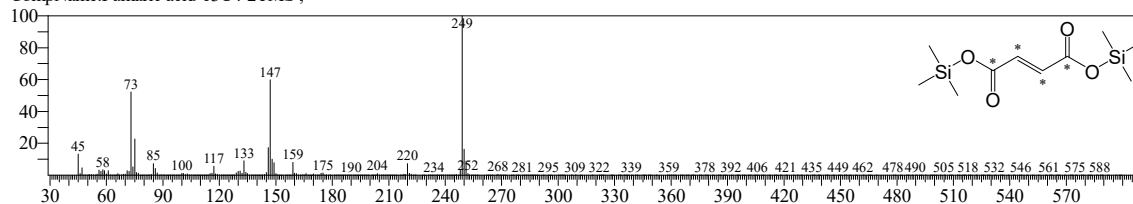

# TNAU

<< Target >>

Line#:14 R.Time:31.785(Scan#:5458) MassPeaks:276

RawMode:Averaged 31.780-31.790(5457-5459) BasePeak:207.05(1439)

BG Mode:Calc. from Peak Group 1 - Event 1 Q3 Scan

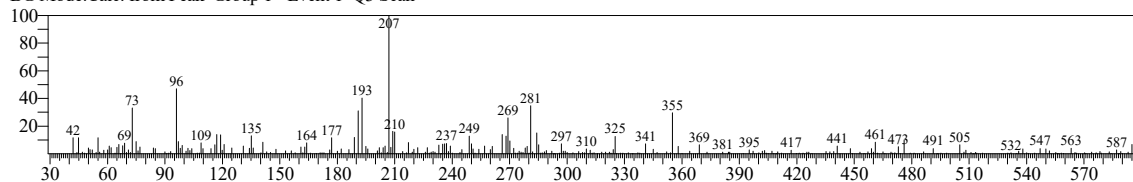

Hit#:1 Entry:402 Library:OA\_TMS\_DB5\_67min\_V3.lib

SI:36 Formula:C20H42O4Si4 CAS:775-01-9 MolWeight:458 RetIndex:1942

CompName:3,4-Dihydroxymandelic acid-4TMS ; 2-(3,4-dihydroxyphenyl)-2-hydroxyacetic acid

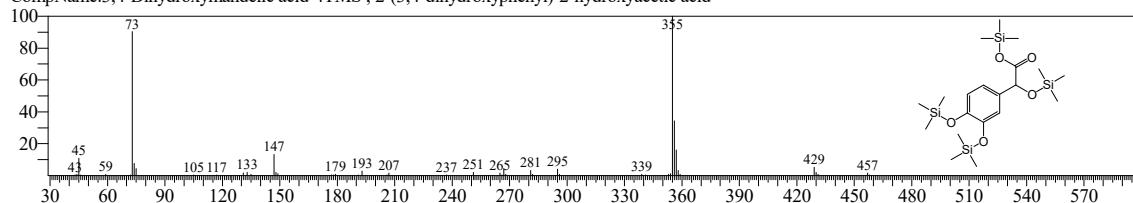

Hit#:2 Entry:343 Library:OA\_TMS\_DB5\_67min\_V3.lib

SI:35 Formula:C18H37NO3Si3 CAS:51-43-4 MolWeight:399 RetIndex:1868

CompName:Epinephrine-3TMS ; 4-[(1R)-1-hydroxy-2-(methylamino)ethyl]benzene-1,2-diol

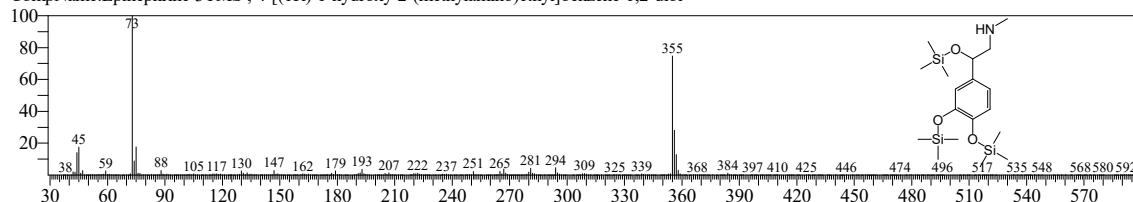

Hit#:3 Entry:315 Library:OA\_TMS\_DB5\_67min\_V3.lib

SI:35 Formula:C16H30O4Si3 CAS:99-50-3 MolWeight:370 RetIndex:1833

CompName:Protocatechuic acid-3TMS ; 3,4-dihydroxybenzoic acid

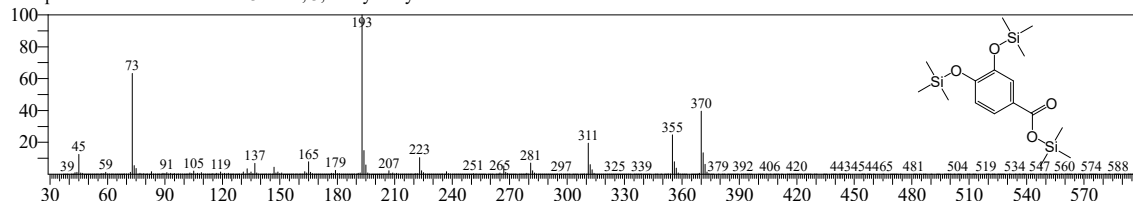

Hit#:4 Entry:232 Library:OA\_TMS\_DB5\_67min\_V3.lib

SI:32 Formula:C17H42O5Si4 CAS:10323-20-3 MolWeight:438 RetIndex:1667

CompName:Arabinose-4TMS(2) ; (2S,3R,4R)-2,3,4,5-tetrahydroxypentanal

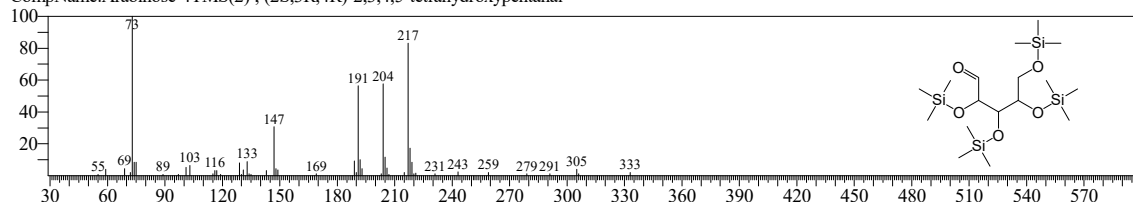

Hit#:5 Entry:328 Library:OA\_TMS\_DB5\_67min\_V3.lib

SI:32 Formula:C13H23NO2Si2 CAS:150-13-0 MolWeight:281 RetIndex:1845

CompName:4-Aminobenzoic acid-2TMS ; 4-aminobenzoic acid

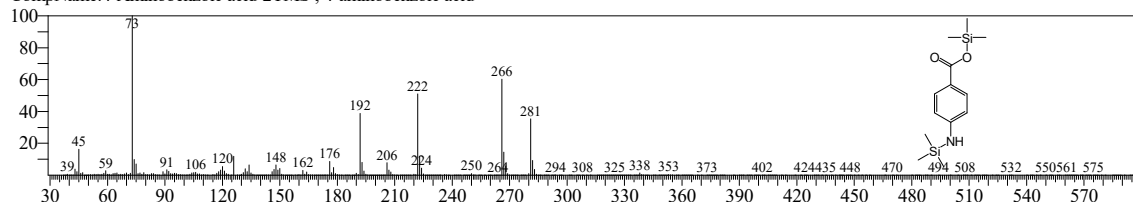

# TNAU

<< Target >>

Line#:15 R.Time:31.905(Scan#:5482) MassPeaks:331

RawMode:Averaged 31.900-31.910(5481-5483) BasePeak:139.10(1014)

BG Mode:Calc. from Peak Group 1 - Event 1 Q3 Scan

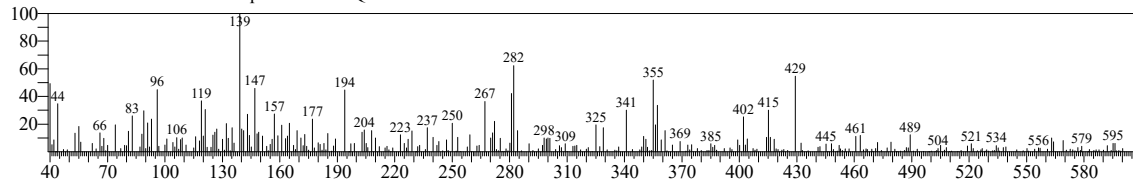

Hit#:1 Entry:402 Library:OA\_TMS\_DB5\_67min\_V3.lib

SI:28 Formula:C20H42O4Si4 CAS:775-01-9 MolWeight:458 RetIndex:1942

CompName:3,4-Dihydroxymandelic acid-4TMS ; 2-(3,4-dihydroxyphenyl)-2-hydroxyacetic acid

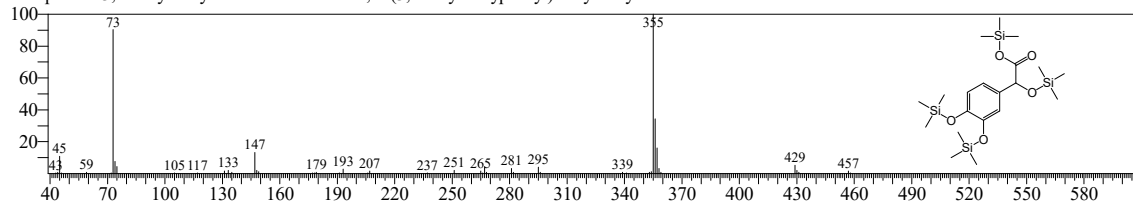

Hit#:2 Entry:179 Library:OA\_TMS\_DB5\_67min\_V3.lib

SI:27 Formula:C13H22O3Si2 CAS:99-06-9 MolWeight:282 RetIndex:1572

CompName:3-Hydroxybenzoic acid-2TMS ; 3-hydroxybenzoic acid

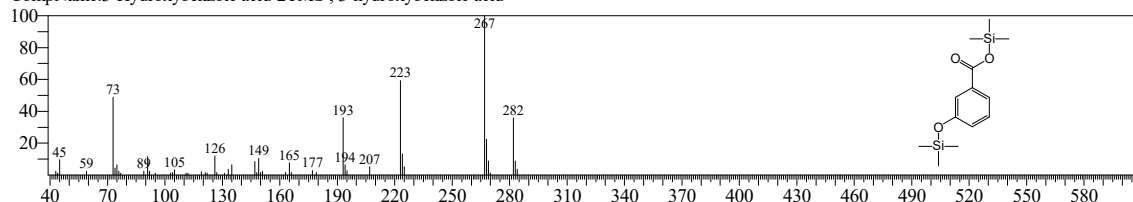

Hit#:3 Entry:211 Library:OA\_TMS\_DB5\_67min\_V3.lib

SI:25 Formula:C13H22O3Si2 CAS:99-96-7 MolWeight:282 RetIndex:1636

CompName:4-Hydroxybenzoic acid-2TMS ; 4-hydroxybenzoic acid

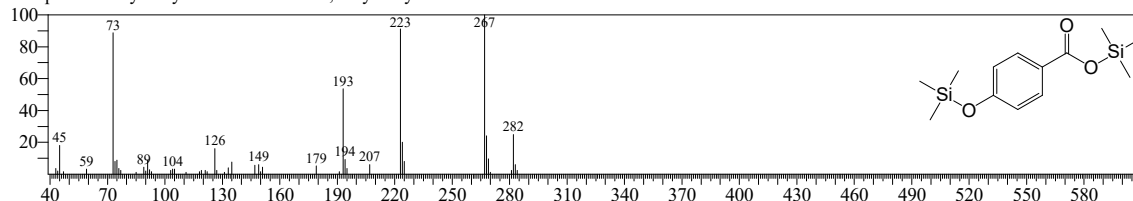

Hit#:4 Entry:15 Library:FA\_ME\_SP2560\_EI\_V3.lib

SI:23 Formula:C18H34O2 CAS:29743-97-3 MolWeight:282 RetIndex:2581

CompName:Methyl cis-10-heptadecenoate ; Heptadec-10-enoic acid

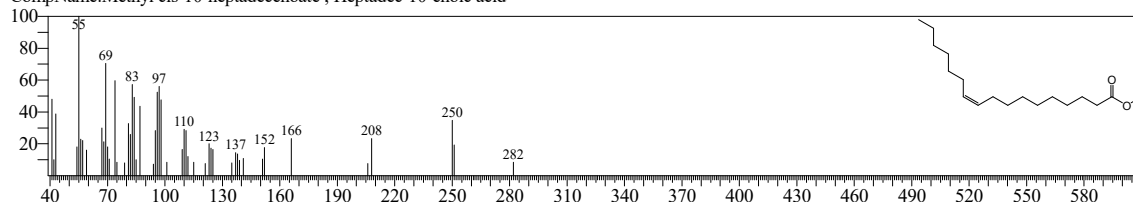

Hit#:5 Entry:341 Library:OA\_TMS\_DB5\_67min\_V3.lib

SI:22 Formula:C18H34O4Si3 CAS:3247-75-4 MolWeight:398 RetIndex:1864

CompName:3-(3-Hydroxyphenyl)-3-hydroxypropionic acid-3TMS ; 3-hydroxy-3-(3-hydroxyphenyl)propanoic acid

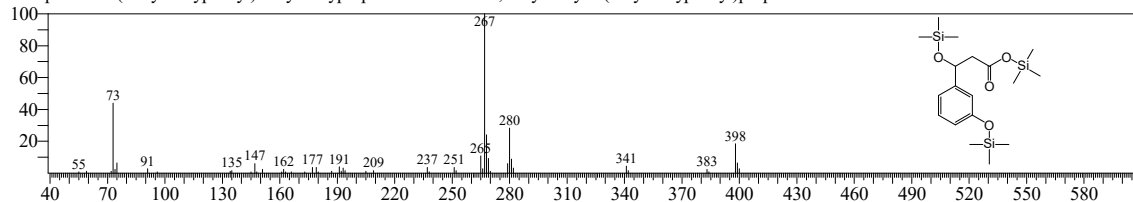



# TNAU

<< Target >>

Line#:16 R.Time:31.935(Scan#:5488) MassPeaks:287

RawMode:Averaged 31.930-31.940(5487-5489) BasePeak:281.05(1175)

BG Mode:Calc. from Peak Group 1 - Event 1 Q3 Scan

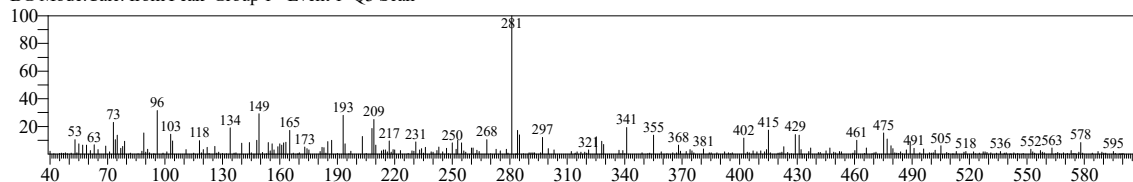

Hit#:1 Entry:184 Library:OA TMS DB5\_67min\_V3.lib

SI:34 Formula:C<sub>14</sub>H<sub>24</sub>O<sub>3</sub>Si<sub>2</sub> CAS:614-75-5 MolWeight:296 RetIndex:1579

CompName:2-Hydroxyphenylacetic acid-2TMS ; 2-(2-hydroxyphenyl)acetic acid

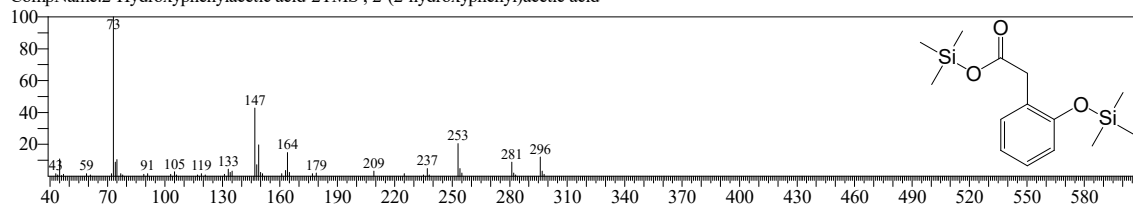

Hit#:2 Entry:195 Library:OA TMS DB5\_67min\_V3.lib

SI:32 Formula:C<sub>15</sub>H<sub>26</sub>O<sub>3</sub>Si<sub>2</sub> CAS:529-64-6 MolWeight:310 RetIndex:1600

CompName:Tropic acid-2TMS ; 3-hydroxy-2-phenylpropanoic acid

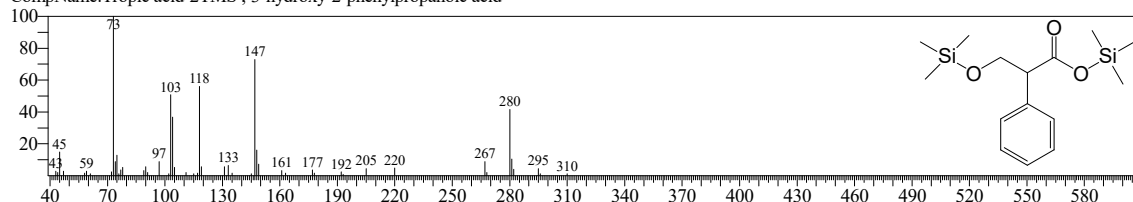

Hit#:3 Entry:200 Library:OA TMS DB5\_67min\_V3.lib

SI:32 Formula:C<sub>14</sub>H<sub>24</sub>O<sub>3</sub>Si<sub>2</sub> CAS:621-37-4 MolWeight:296 RetIndex:1617

CompName:3-Hydroxyphenylacetic acid-2TMS ; 2-(3-hydroxyphenyl)acetic acid

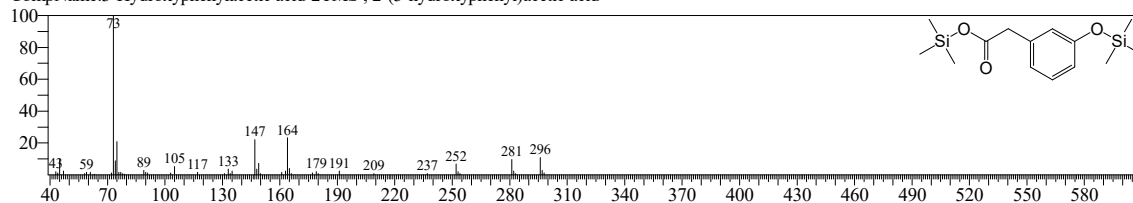

Hit#:4 Entry:438 Library:OA TMS DB5\_67min\_V3.lib

SI:31 Formula:C<sub>12</sub>H<sub>22</sub>N<sub>2</sub>O<sub>2</sub>Si<sub>2</sub> CAS:104-98-3 MolWeight:282 RetIndex:2014

CompName:Urocanic acid-2TMS ; (E)-3-(1H-imidazol-5-yl)prop-2-enoic acid

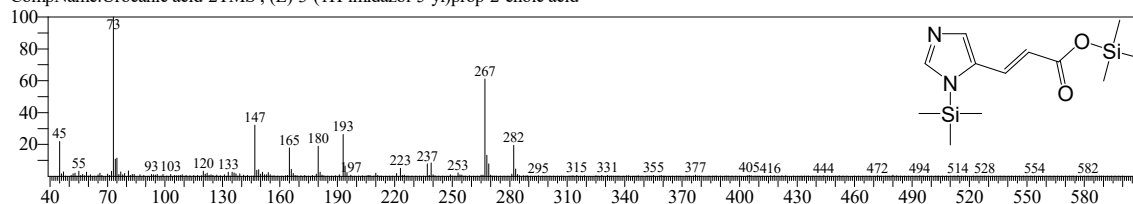

Hit#:5 Entry:220 Library:OA TMS DB5\_67min\_V3.lib

SI:30 Formula:C<sub>14</sub>H<sub>24</sub>O<sub>3</sub>Si<sub>2</sub> CAS:156-38-7 MolWeight:296 RetIndex:1647

CompName:4-Hydroxyphenylacetic acid-2TMS ; 2-(4-hydroxyphenyl)acetic acid

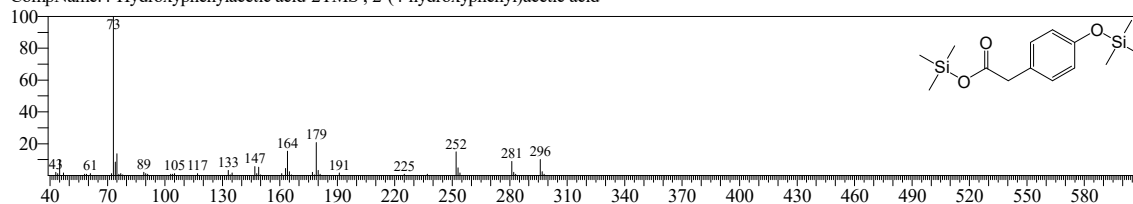

Supplement: Supplementary file 1 [file supplementary]
