# Supplementary material for: Comparative Metabolomics Profiling Reveals Key Metabolites and Associated Pathways Regulating Tuber Dormancy in White Yam (<em>Dioscorea rotundata</em>)
Source: Preprints.org preprint supplement (doi:10.20944/preprints202303.0378.v1), 2023-03-21

# TNAU

## Sample Information

Analyzed by : Admin  
 Analyzed : 02-Sep-22 2:22:08 AM  
 Sample Type : Unknown  
 Level # : 1  
 Sample Name : Sample  
 Sample ID : 4-1  
 IS Amount : [1]=1  
 Sample Amount : 1  
 Dilution Factor : 1  
 Vial # : 5  
 Injection Volume : 2.00  
 Data File : D:\GCMS-8040NX\Sep 2022\Users\01.09.2022\01092022011.qgd  
 Org Data File : D:\GCMS-8040NX\Sep 2022\Users\01.09.2022\01092022011.qgd  
 Method File : D:\GCMS-8040NX\Sep 2022\Method\Scan\_methodfile.qgm  
 Org Method File : D:\GCMS-8040NX\Sep 2022\Method\Scan\_methodfile.qgm  
 Report File :  
 Tuning File : D:\GCMS-8040NX\Aug 2022\Tuning Data\TUNING 25082022.qgt  
 Modified by : Admin  
 Modified : 05-Sep-22 10:59:33 AM

Chromatogram Sample D:\GCMS-8040NX\Sep 2022\Users\01.09.2022\01092022011.qgd

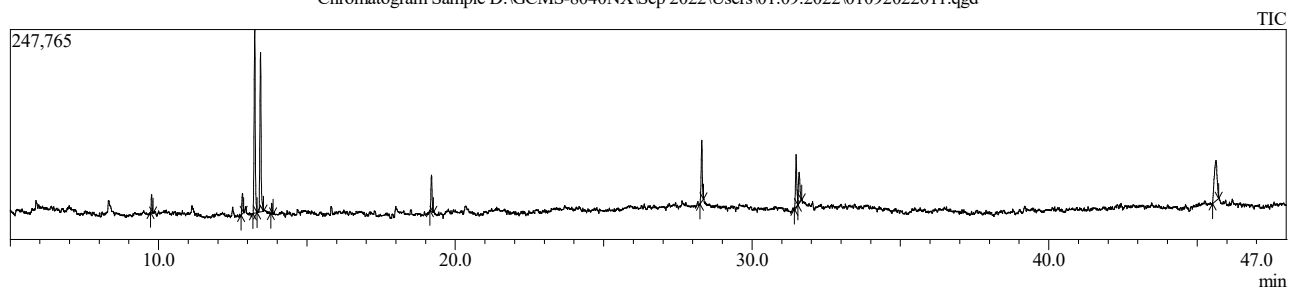

Peak Report TIC

| Peak# | R.Time | Area    | Area%  | Height | Height% | A/H  | Similarity | Name                                    |
|-------|--------|---------|--------|--------|---------|------|------------|-----------------------------------------|
| 1     | 9.766  | 42174   | 1.94   | 21045  | 2.92    | 2.00 | 93         | Pentasiloxane, dodecamethyl-            |
| 2     | 12.825 | 59131   | 2.71   | 24275  | 3.36    | 2.44 | 73         | 1,3-Benzodioxol-5-ol                    |
| 3     | 13.240 | 597113  | 27.41  | 216535 | 29.99   | 2.76 | 54         | Methyl cis-13,16-Docosadienate          |
| 4     | 13.436 | 517737  | 23.77  | 187885 | 26.02   | 2.76 | 54         | Methyl cis-13,16-Docosadienate          |
| 5     | 13.812 | 25855   | 1.19   | 11918  | 1.65    | 2.17 | 80         | Trisiloxane, octamethyl-                |
| 6     | 19.198 | 108392  | 4.98   | 42729  | 5.92    | 2.54 | 95         | 2,4-Di-tert-butylphenoxytrimethylsilane |
| 7     | 28.305 | 195924  | 9.00   | 72365  | 10.02   | 2.71 | 96         | n-Hexadecanoic acid                     |
| 8     | 31.487 | 177996  | 8.17   | 61428  | 8.51    | 2.90 | 95         | 10E,12Z-Octadecadienoic acid            |
| 9     | 31.587 | 135735  | 6.23   | 36436  | 5.05    | 3.73 | 91         | 9,12,15-Octadecatrienoic acid, (Z,Z,Z)- |
| 10    | 45.634 | 318061  | 14.60  | 47326  | 6.56    | 6.72 | 90         | Diosgenin                               |
|       |        | 2178118 | 100.00 | 721942 | 100.00  |      |            |                                         |

Library

# TNAU

<< Target >>

Line#:1 R.Time:9.765(Scan#:954) MassPeaks:325  
RawMode:Averaged 9.760-9.770(953-955) BasePeak:281.05(5031)  
BG Mode:Calc. from Peak Group 1 - Event 1 Q3 Scan

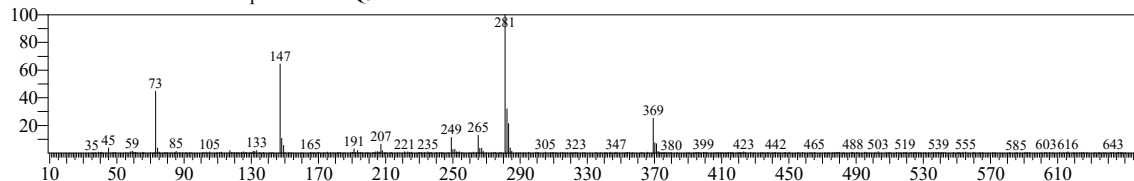

Hit#:1 Entry:40975 Library:NIST20R.lib

SI:93 Formula:C<sub>12</sub>H<sub>36</sub>O<sub>4</sub>Si<sub>5</sub> CAS:141-63-9 MolWeight:384 RetIndex:1068

CompName:Pentasiloxane, dodecamethyl- \$\$ Dodecamethylpentasiloxane \$\$ 1,1,1,3,3,5,5,7,7,9,9-Dodecamethylpentasiloxane #

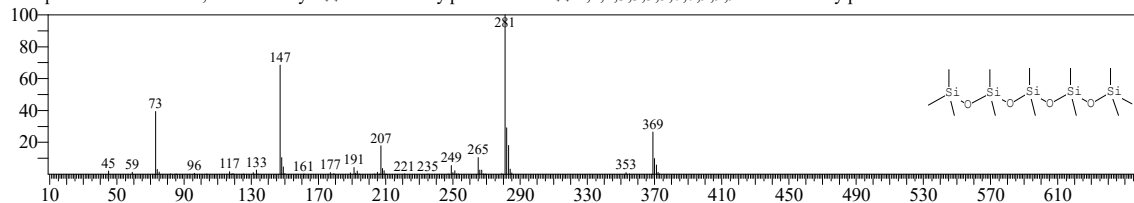

Hit#:2 Entry:249272 Library:NIST20M1.lib

SI:82 Formula:C<sub>12</sub>H<sub>36</sub>O<sub>4</sub>Si<sub>5</sub> CAS:3555-47-3 MolWeight:384 RetIndex:1068

CompName:Trisiloxane, 1,1,1,5,5,5-hexamethyl-3,3-bis[(trimethylsilyl)oxy]- \$\$ Tetrakis(trimethylsiloxy)silane \$\$ Trisiloxane, 1,1,1,5,5,5-hexamethyl-3,3-b

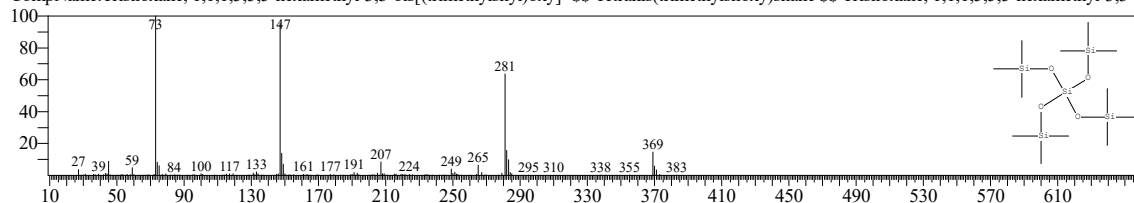

Hit#:3 Entry:27848 Library:NIST20M2.lib

SI:80 Formula:C<sub>18</sub>H<sub>48</sub>O<sub>4</sub>Si<sub>5</sub> CAS:0-00-0 MolWeight:468 RetIndex:1495

CompName:1,3,5,7,9-Pentasiloxane, 1,1,3,3,5,5,7,7,9,9-decamethyl-1,9-di(tert.butyl)-

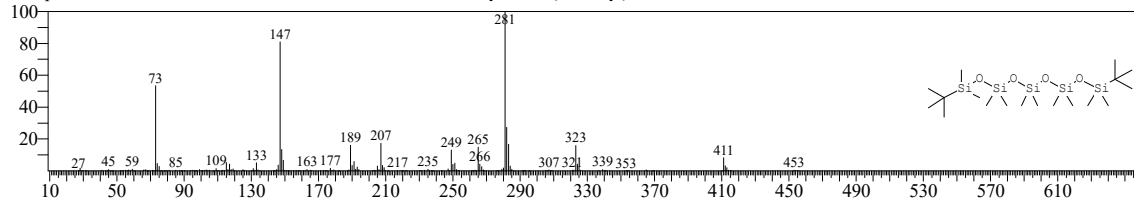

Hit#:4 Entry:249271 Library:NIST20M1.lib

SI:78 Formula:C<sub>12</sub>H<sub>36</sub>O<sub>4</sub>Si<sub>5</sub> CAS:38146-99-5 MolWeight:384 RetIndex:1068

CompName:1,1,1,3,5,5,7,7,7-Nonamethyl-3-(trimethylsiloxy)tetrasiloxane \$\$ 1,1,1,3,3,5,5,7,7-Nonamethyl-5-[(trimethylsilyl)oxy]tetrasiloxane #

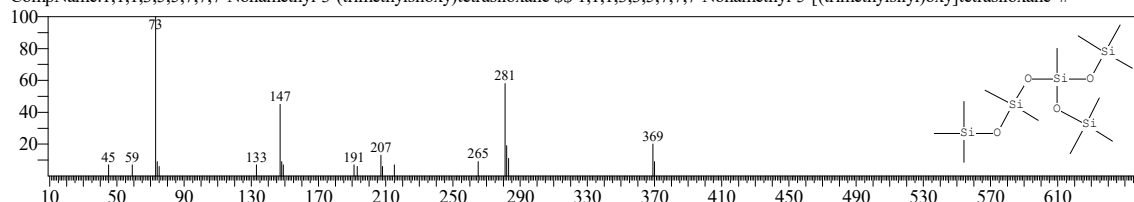

Hit#:5 Entry:158097 Library:NIST20M1.lib

SI:76 Formula:C<sub>14</sub>H<sub>24</sub>O<sub>3</sub>Si<sub>2</sub> CAS:0-00-0 MolWeight:296 RetIndex:1625

CompName:2,6-Dihydroxyacetophenone, 2TMS derivative \$\$ 2',6'-Dihydroxyacetophenone, bis(trimethylsilyl) ether

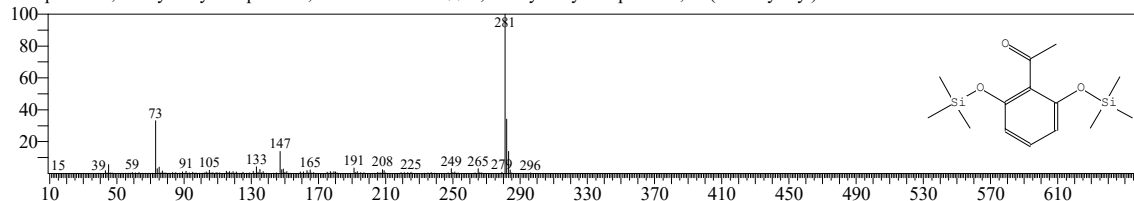

# TNAU

<< Target >>

Line#2 R.Time:12.825(Scan#:1566) MassPeaks:352

RawMode:Averaged 12.820-12.830(1565-1567) BasePeak:138.05(7780)

BG Mode:Calc. from Peak Group 1 - Event 1 Q3 Scan

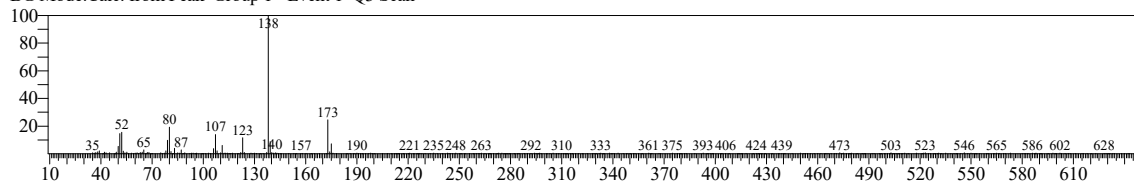

Hit#1 Entry:11187 Library:NIST20M1.lib

SI:73 Formula:C7H6O3 CAS:533-31-3 MolWeight:138 RetIndex:1245

CompName:1,3-Benzodioxol-5-ol \$\$ Phenol, 3,4-(methylenedioxy)- \$\$ Sesamol \$\$ 3,4-(Methylenedioxy)phenol \$\$ 5-Hydroxy-1,3-benzodioxole \$\$ Methy

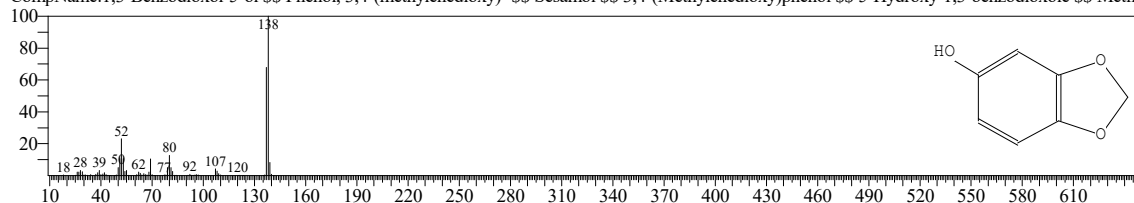

Hit#2 Entry:11188 Library:NIST20M1.lib

SI:73 Formula:C7H6O3 CAS:69393-72-2 MolWeight:138 RetIndex:1245

CompName:2,3-Methylenedioxyphenol \$\$ 1,3-Benzodioxol-4-ol #

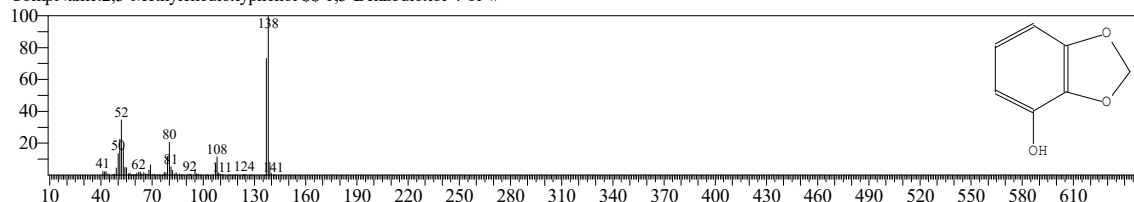

Hit#3 Entry:8360 Library:NIST20R.lib

SI:72 Formula:C6H6N2O2 CAS:105-11-3 MolWeight:138 RetIndex:1349

CompName:2,5-Cyclohexadiene-1,4-dione, dioxime \$\$ p-Benzoquinone, dioxime \$\$ p-Quinone dioxime \$\$ p-Quinone oxime \$\$ Benzoquinone dioxime \$\$

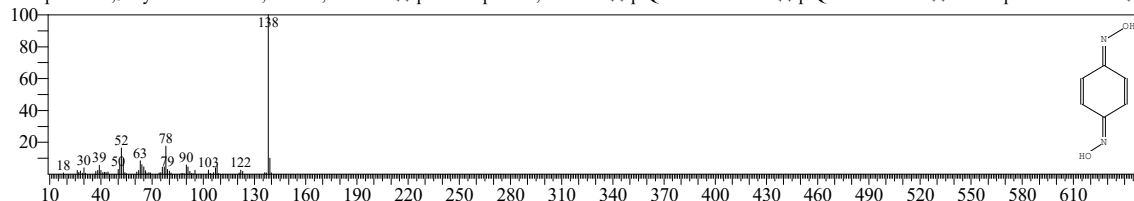

Hit#4 Entry:21 Library:FA\_ME\_SP2560\_EI\_V3.lib

SI:34 Formula:C19H34O2 CAS:60-33-3 MolWeight:294 RetIndex:2775

CompName:Methyl linoleate ; Octadeca-9,12-dienoic acid

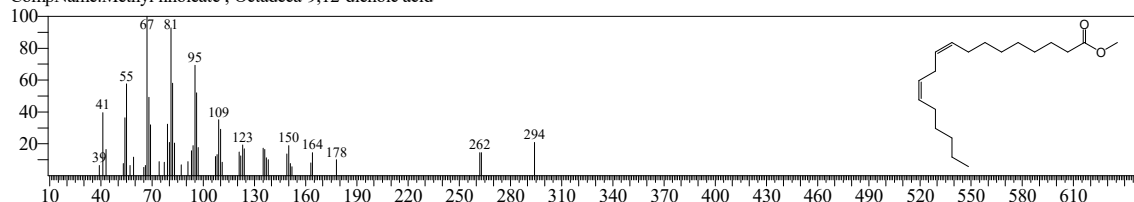

Hit#5 Entry:34 Library:FA\_ME\_SP2560\_EI\_V3.lib

SI:34 Formula:C23H42O2 CAS:7370-49-2 MolWeight:350 RetIndex:3169

CompName:Methyl cis-13,16-Docosadienate ; (13Z,16E)-docosa-13,16-dienoic acid

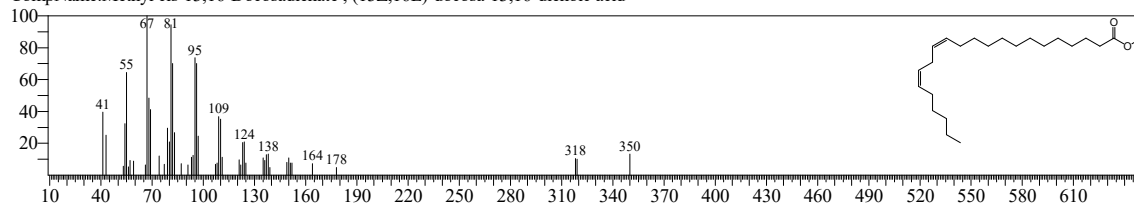

# TNAU

<< Target >>

Line#3 R.Time:13.240(Scan#:1649) MassPeaks:330

RawMode:Averaged 13.235-13.245(1648-1650) BasePeak:155.10(34645)

BG Mode:Calc. from Peak Group 1 - Event 1 Q3 Scan

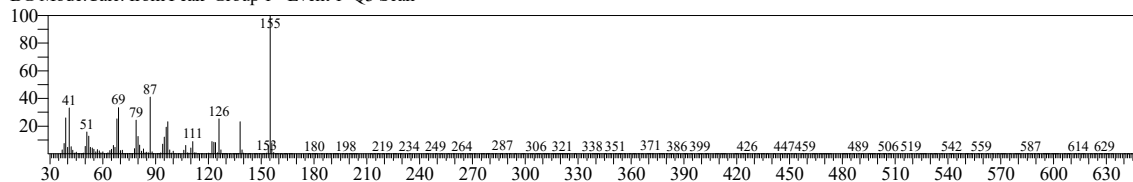

Hit#:1 Entry:34 Library:FA\_ME\_SP2560\_EI\_V3.lib

SI:54 Formula:C23H42O2 CAS:7370-49-2 MolWeight:350 RetIndex:3169

CompName:Methyl cis-13,16-Docosadienate ; (13Z,16E)-docosa-13,16-dienoic acid

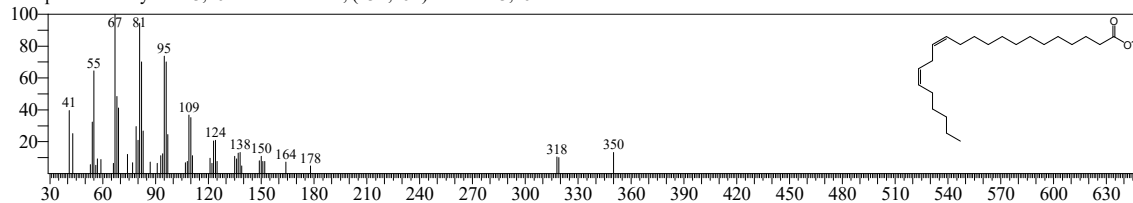

Hit#:2 Entry:21 Library:FA\_ME\_SP2560\_EI\_V3.lib

SI:52 Formula:C19H34O2 CAS:60-33-3 MolWeight:294 RetIndex:2775

CompName:Methyl linoleate ; Octadeca-9,12-dienoic acid

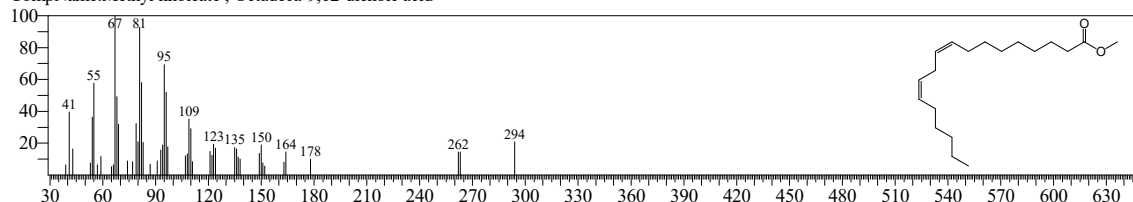

Hit#:3 Entry:20 Library:FA\_ME\_SP2560\_EI\_V3.lib

SI:52 Formula:C19H34O2 CAS:506-21-8 MolWeight:294 RetIndex:2727

CompName:Methyl linolelaidate ; (9E,12E)-octadeca-9,12-dienoic acid

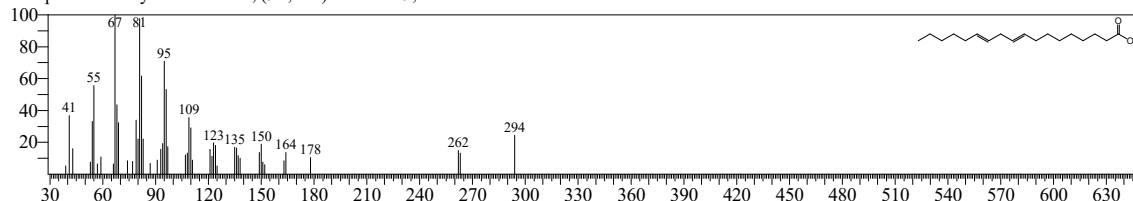

Hit#:4 Entry:27 Library:FA\_ME\_SP2560\_EI\_V3.lib

SI:52 Formula:C21H38O2 CAS:2091-39-6 MolWeight:322 RetIndex:2973

CompName:Methyl cis-11,14-Icosadienoate ; Icosa-11,14-dienoic acid

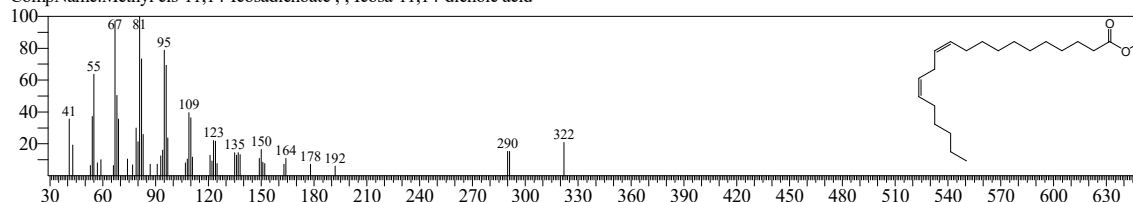

Hit#:5 Entry:11 Library:FA\_ME\_SP2560\_EI\_V3.lib

SI:52 Formula:C16H30O2 CAS:84743-29-3 MolWeight:254 RetIndex:2388

CompName:Methyl cis-10-pentadecenoate ; (Z)-pentadec-10-enoic acid

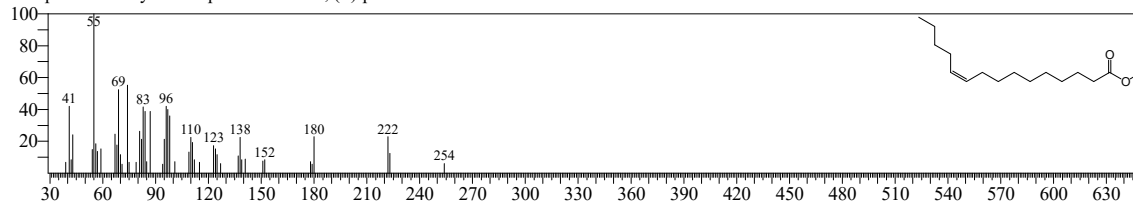

# TNAU

<< Target >>

Line#:4 R.Time:13.435(Scan#:1688) MassPeaks:402

RawMode:Averaged 13.430-13.440(1687-1689) BasePeak:155.05(29699)

BG Mode:Calc. from Peak Group 1 - Event 1 Q3 Scan

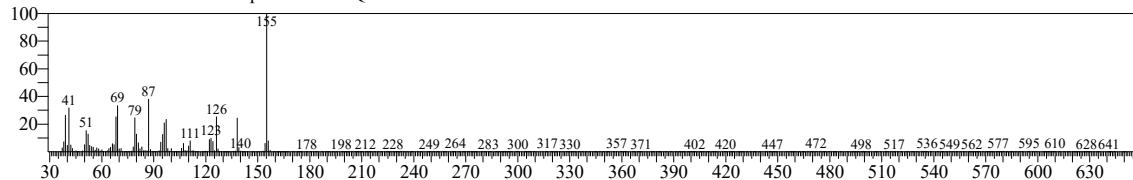

Hit#:1 Entry:34 Library:FA\_ME\_SP2560\_EI\_V3.lib

SI:54 Formula:C23H42O2 CAS:7370-49-2 MolWeight:350 RetIndex:3169

CompName:Methyl cis-13,16-Docosadienate ; (13Z,16E)-docosa-13,16-dienoic acid

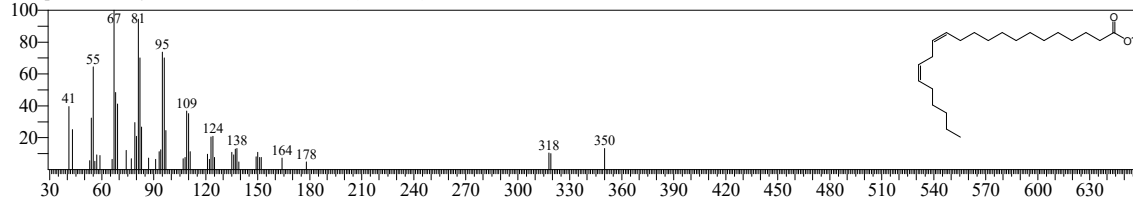

Hit#:2 Entry:21 Library:FA\_ME\_SP2560\_EI\_V3.lib

SI:52 Formula:C19H34O2 CAS:60-33-3 MolWeight:294 RetIndex:2775

CompName:Methyl linoleate ; Octadeca-9,12-dienoic acid

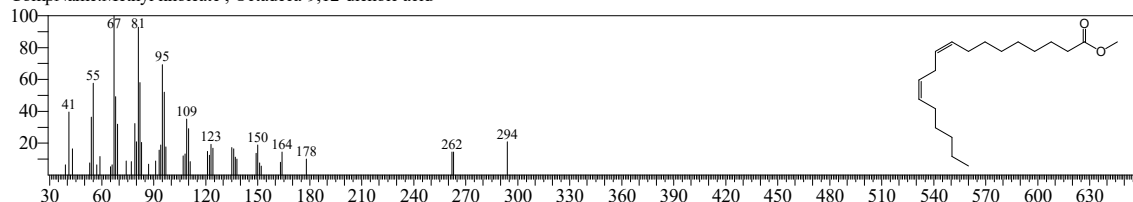

Hit#:3 Entry:20 Library:FA\_ME\_SP2560\_EI\_V3.lib

SI:52 Formula:C19H34O2 CAS:506-21-8 MolWeight:294 RetIndex:2727

CompName:Methyl linolelaidate ; (9E,12E)-octadeca-9,12-dienoic acid

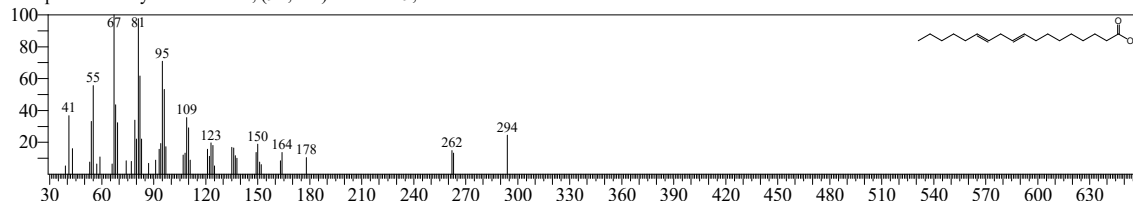

Hit#:4 Entry:27 Library:FA\_ME\_SP2560\_EI\_V3.lib

SI:52 Formula:C21H38O2 CAS:2091-39-6 MolWeight:322 RetIndex:2973

CompName:Methyl cis-11,14-Icosadienoate ; Icosa-11,14-dienoic acid

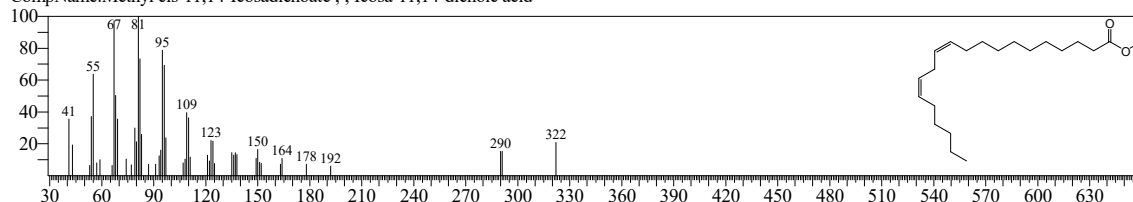

Hit#:5 Entry:11 Library:FA\_ME\_SP2560\_EI\_V3.lib

SI:52 Formula:C16H30O2 CAS:84743-29-3 MolWeight:254 RetIndex:2388

CompName:Methyl cis-10-pentadecenoate ; (Z)-pentadec-10-enoic acid

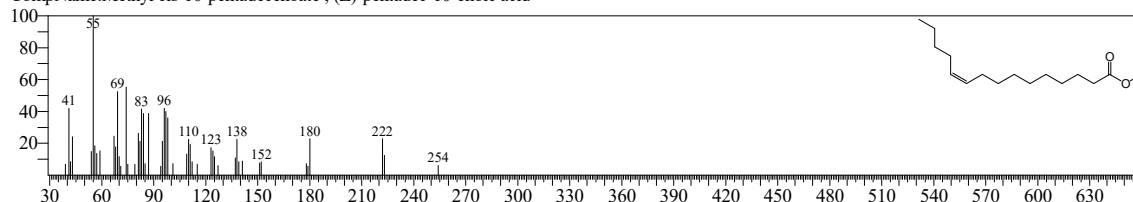

# TNAU

<< Target >>

Line#:5 R.Time:13.810(Scan#:1763) MassPeaks:357

RawMode:Averaged 13.805-13.815(1762-1764) BasePeak:221.05(3464)

BG Mode:Calc. from Peak Group 1 - Event 1 Q3 Scan

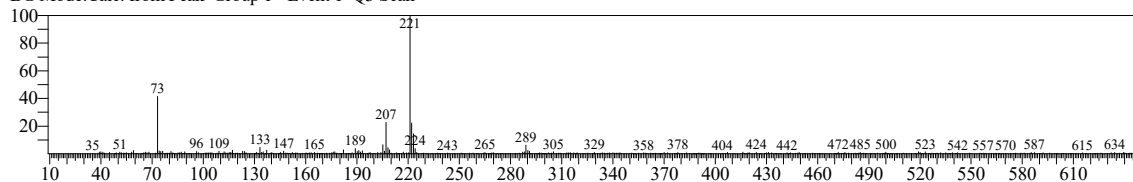

Hit#:1 Entry:28950 Library:NIST20R.lib

SI:80 Formula:C8H24O2Si3 CAS:107-51-7 MolWeight:236 RetIndex:698

CompName:Trisiloxane, octamethyl- \$\$ Octamethyltrisiloxane \$\$ Silane, dimethylbis(trimethylsiloxy)- 1,1,1,3,3,5,5,5-Octamethyltrisiloxane \$\$ [(CH3)3

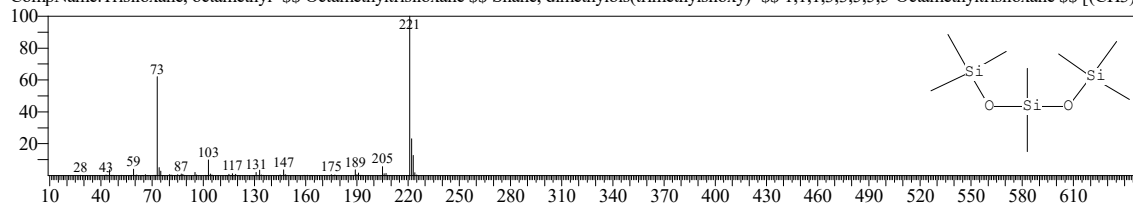

Hit#:2 Entry:186590 Library:NIST20M1.lib

SI:76 Formula:C14H36O2Si3 CAS:0-00-0 MolWeight:320 RetIndex:1126

CompName:1,3,5-Trisiloxane, 1,1,3,3,5,5-hexamethyl-1,5-di(tert.butyl)-

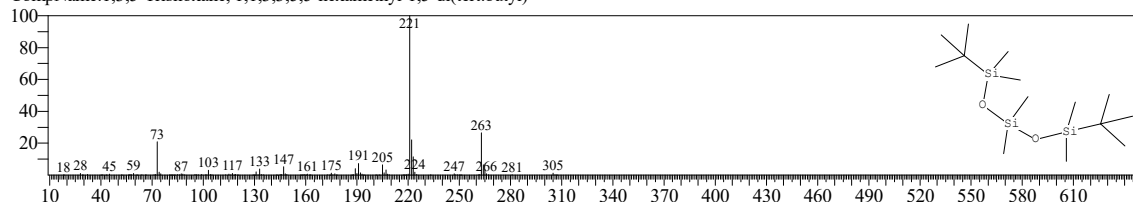

Hit#:3 Entry:33791 Library:NIST20R.lib

SI:75 Formula:C9H27BO3Si3 CAS:4325-85-3 MolWeight:278 RetIndex:0

CompName:Boric acid, 3TMS derivative \$\$ Tris(trimethylsilyl)borate \$\$ Silanol, trimethyl-, triester with boric acid (H3BO3) \$\$ Borane, tris(trimethylsiloxy)

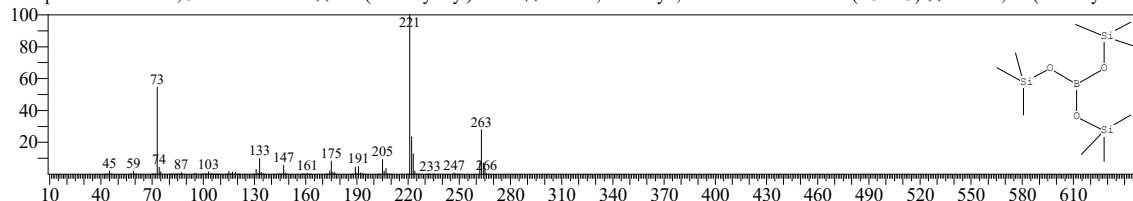

Hit#:4 Entry:186586 Library:NIST20M1.lib

SI:75 Formula:C14H32O2SSi2 CAS:82112-29-6 MolWeight:320 RetIndex:1482

CompName:Thioglycolic acid, S-(tert-butyl)dimethylsilyl-, tert-butyl)dimethylsilyl ester

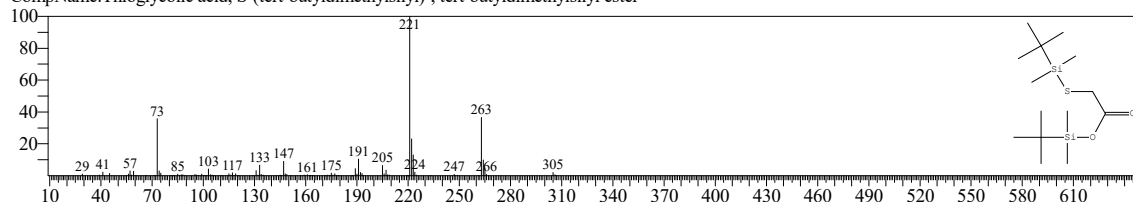

Hit#:5 Entry:155460 Library:NIST20M1.lib

SI:71 Formula:C10H30O2Si4 CAS:4342-25-0 MolWeight:294 RetIndex:807

CompName:3,6-Dioxa-2,4,5,7-tetrasilaoctane, 2,2,4,4,5,5,7,7-octamethyl- \$\$ 2,2,4,4,5,5,7,7-Octamethyl-3,6-dioxa-2,4,5,7-tetrasilaoctane #

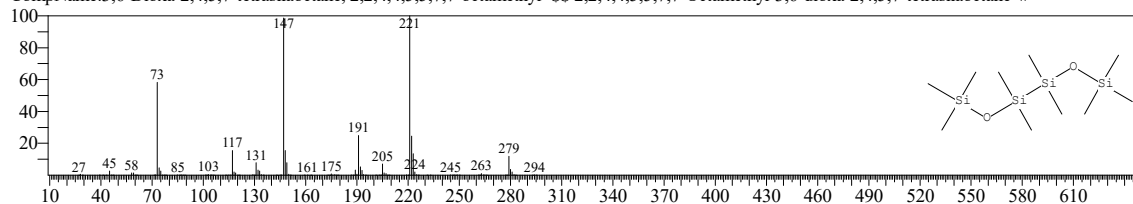

# TNAU

<< Target >>

Line#6 R.Time:19.200(Scan#:2841) MassPeaks:367

RawMode:Averaged 19.195-19.205(2840-2842) BasePeak:263.20(17619)

BG Mode:Calc. from Peak Group 1 - Event 1 Q3 Scan

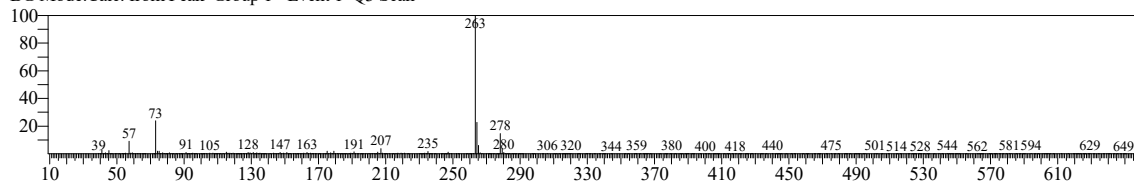

Hit#1 Entry:33874 Library:NIST20R.lib

SI:95 Formula:C17H30OSi CAS:53925-65-8 MolWeight:278 RetIndex:1632

CompName:2,4-Di-tert-butylphenoxytrimethylsilane \$\$ Benzene, 2,4-bis(1,1-dimethylethyl)-1-[(trimethylsilyl)oxy]- \$\$ Silane, [2,4-bis(1,1-dimethylethyl)ph

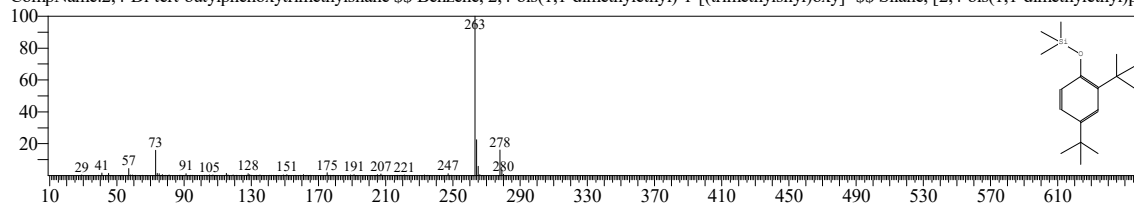

Hit#2 Entry:33871 Library:NIST20R.lib

SI:85 Formula:C17H30OSi CAS:10416-73-6 MolWeight:278 RetIndex:1632

CompName:2,6-Bis(tert-butyl)phenol, TMS derivative \$\$ Trimethyl(2,6 ditert-butylphenoxy)silane \$\$ (2,6-Ditert-butylphenoxy)(trimethyl)silane #

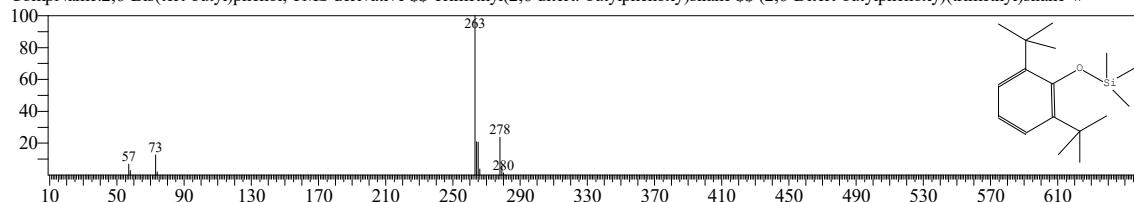

Hit#3 Entry:136557 Library:NIST20M1.lib

SI:84 Formula:C12H22N4Si2 CAS:0-00-0 MolWeight:278 RetIndex:1703

CompName:3-Deazaadenine, 2TMS \$\$ 3-Deazaadenine, N,N'-bis-TMS \$\$ 1H-Imidazo[4,5-c]pyridin-4-amine, N,N'-bis-TMS

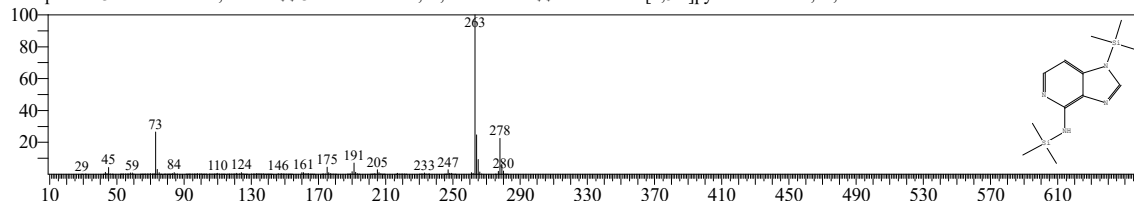

Hit#4 Entry:259338 Library:NIST20M1.lib

SI:81 Formula:C23H30O4Si CAS:0-00-0 MolWeight:398 RetIndex:2735

CompName:2-[1-(1,3-benzodioxol-5-yl)propan-2-yl]-6-methoxy-4-prop-2-enylphenol, TMS derivative \$\$ 2-[1-(1,3-Benzodioxol-5-yl)propan-2-yl]-6-metho

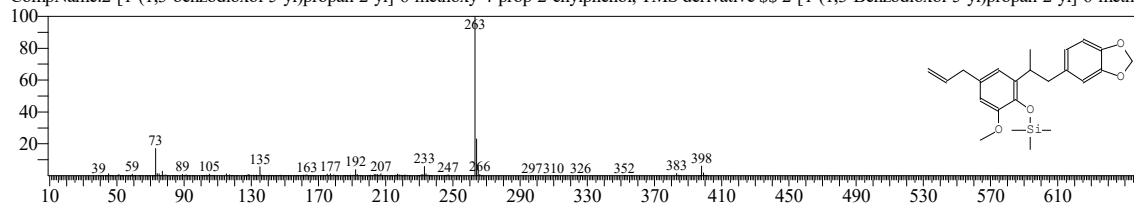

Hit#5 Entry:137020 Library:NIST20M1.lib

SI:80 Formula:C15H22O3Si CAS:0-00-0 MolWeight:278 RetIndex:1736

CompName:6-Methoxy-2,2-dimethyl-2,3-dihydro-4H-chromen-4-one, TMS \$\$ 6-Methoxy-2,2-dimethyl-chroman-4-one, O-trimethylsilyl- \$\$ 4H-1-Benzopy

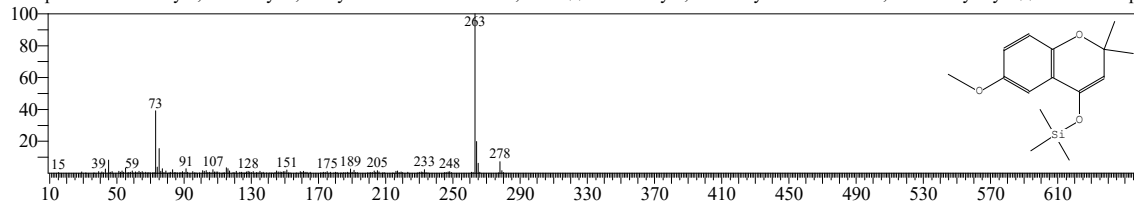

# TNAU

<< Target >>

Line#:7 R.Time:28.305(Scan#:4662) MassPeaks:331

RawMode:Averaged 28.300-28.310(4661-4663) BasePeak:73.05(6341)

BG Mode:Calc. from Peak Group 1 - Event 1 Q3 Scan

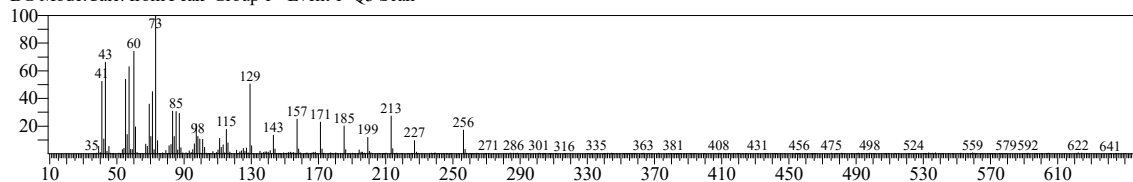

Hit#:1 Entry:31600 Library:NIST20R.lib

SI:96 Formula:C16H32O2 CAS:57-10-3 MolWeight:256 RetIndex:1968

CompName:n-Hexadecanoic acid \$ Hexadecanoic acid \$ n-Hexadecic acid \$ Palmitic acid \$ Pentadecanecarboxylic acid \$ 1-Pentadecanecarboxylic

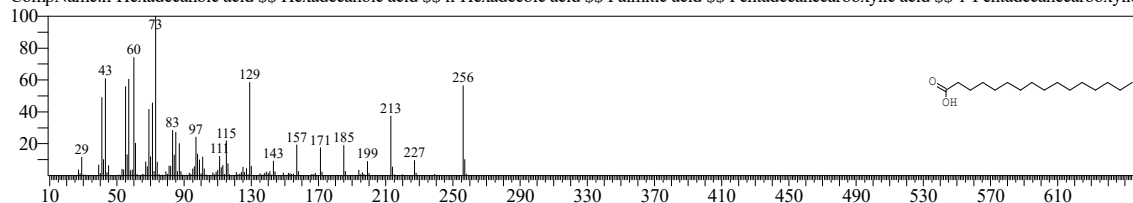

Hit#:2 Entry:29890 Library:NIST20R.lib

SI:92 Formula:C15H30O2 CAS:1002-84-2 MolWeight:242 RetIndex:1869

CompName:Pentadecanoic acid \$ Pentadecylic acid \$ n-Pentadecanoic acid \$ n-Pentadecylic acid

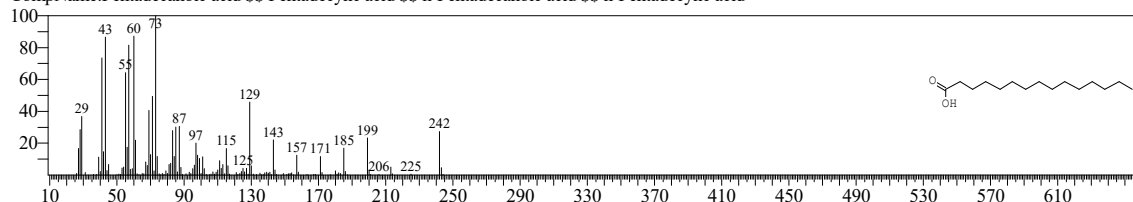

Hit#:3 Entry:25643 Library:NIST20R.lib

SI:91 Formula:C13H26O2 CAS:638-53-9 MolWeight:214 RetIndex:1670

CompName:Tridecanoic acid \$ n-Tridecanoic acid \$ n-Tridecoic acid \$ Tridecyclic acid

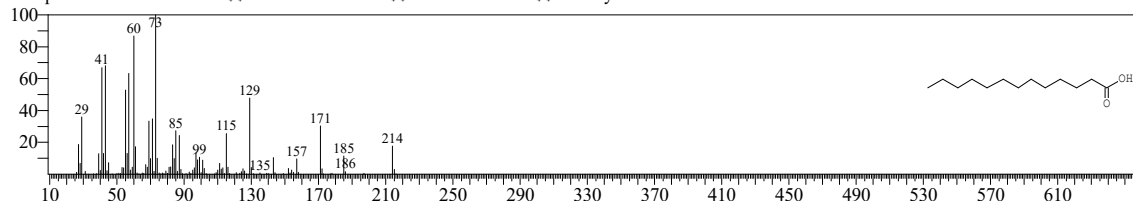

Hit#:4 Entry:44286 Library:NIST20M2.lib

SI:90 Formula:C38H68O8 CAS:28474-90-0 MolWeight:652 RetIndex:4765

CompName:l-(+)-Ascorbic acid 2,6-dihexadecanoate

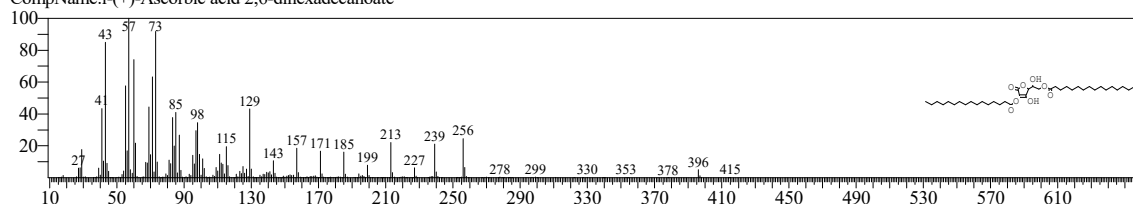

Hit#:5 Entry:81713 Library:NIST20M1.lib

SI:90 Formula:C14H28O2 CAS:544-63-8 MolWeight:228 RetIndex:1769

CompName:Tetradecanoic acid \$ Myristic acid \$ n-Tetradecanoic acid \$ n-Tetradecic acid \$ Neo-Fat 14 \$ Univol U 316S \$ 1-Tridecanecarboxylic

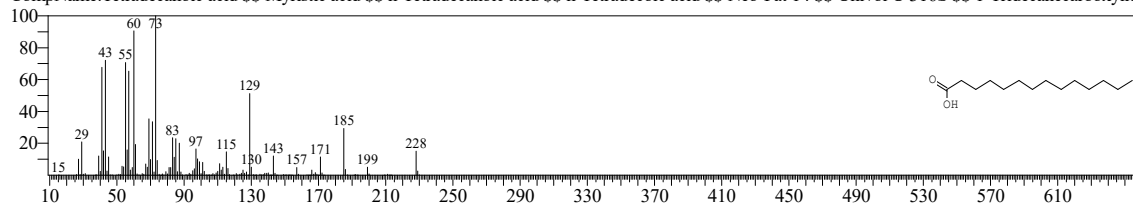



# TNAU

<< Target >>

Line#:8 R.Time:31.485(Scan#:5298) MassPeaks:427

RawMode:Averaged 31.480-31.490(5297-5299) BasePeak:67.05(5341)

BG Mode:Calc. from Peak Group 1 - Event 1 Q3 Scan

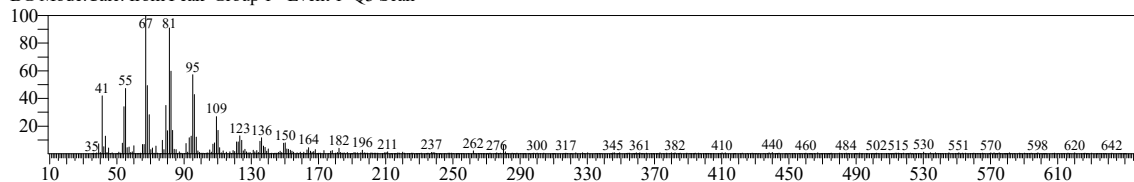

Hit#:1 Entry:139646 Library:NIST20M1.lib

SI:95 Formula:C18H32O2 CAS:2420-56-6 MolWeight:280 RetIndex:2183

CompName:10E,12Z-Octadecadienoic acid

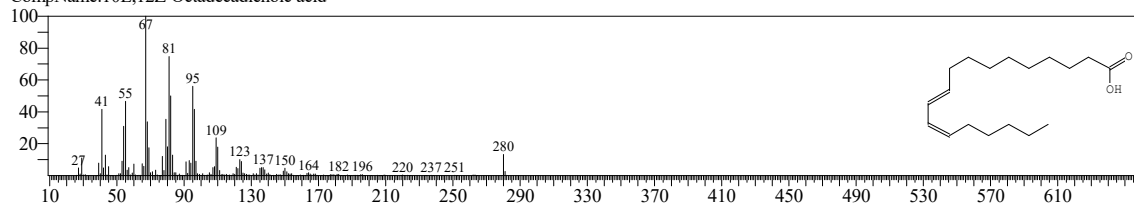

Hit#:2 Entry:34035 Library:NIST20R.lib

SI:95 Formula:C18H32O2 CAS:60-33-3 MolWeight:280 RetIndex:2183

CompName:9,12-Octadecadienoic acid (Z,Z)- \$cis-9,cis-12-Octadecadienoic acid \$cis,cis-Linoleic acid \$Grape seed oil \$Linoleic \$Linoleic acid \$

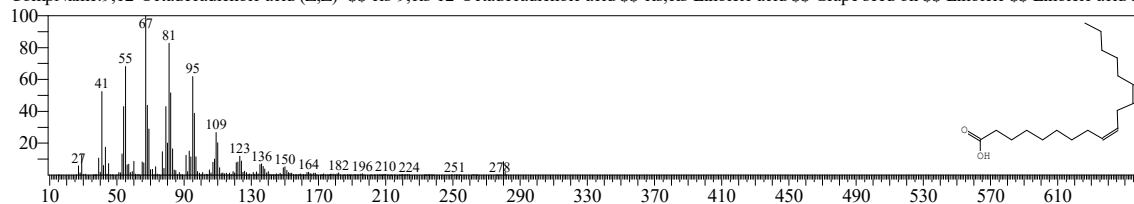

Hit#:3 Entry:139651 Library:NIST20M1.lib

SI:95 Formula:C18H32O2 CAS:544-71-8 MolWeight:280 RetIndex:2183

CompName:(9E,11E)-Octadecadienoic acid

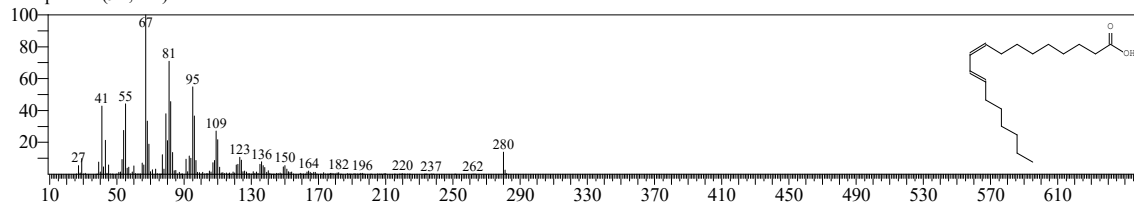

Hit#:4 Entry:139661 Library:NIST20M1.lib

SI:94 Formula:C18H32O2 CAS:506-21-8 MolWeight:280 RetIndex:2183

CompName:Linoelaidic acid

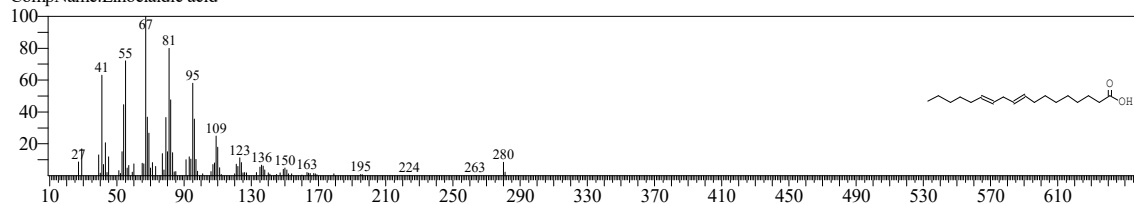

Hit#:5 Entry:173215 Library:NIST20M1.lib

SI:93 Formula:C20H36O2 CAS:2091-39-6 MolWeight:308 RetIndex:2382

CompName:11,14-Eicosadienoic acid

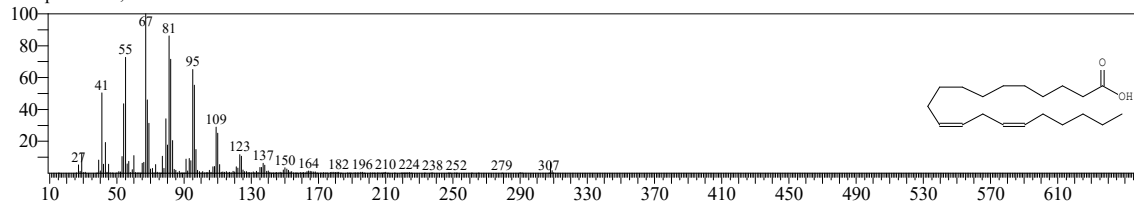

# TNAU

<< Target >>

Line#9 R.Time:31.585(Scan#:5318) MassPeaks:353

RawMode:Averaged 31.580-31.590(5317-5319) BasePeak:79.10(2799)

BG Mode:Calc. from Peak Group 1 - Event 1 Q3 Scan

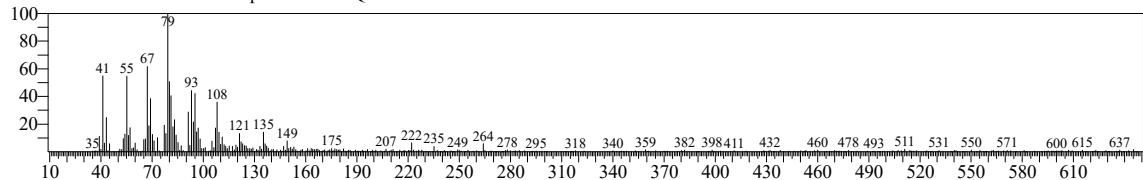

Hit#1 Entry:137464 Library:NIST20M1.lib

SI:91 Formula:C18H30O2 CAS:463-40-1 MolWeight:278 RetIndex:2191

CompName:9,12,15-Octadecatrienoic acid, (Z,Z,Z)- \$\$ Linolenic acid \$\$ .alpha.-Linolenic acid \$\$ All-cis-9,12,15-Octadecatrienoic acid \$\$ cis,cis,cis-9,12,15-Octadecatrienoic acid

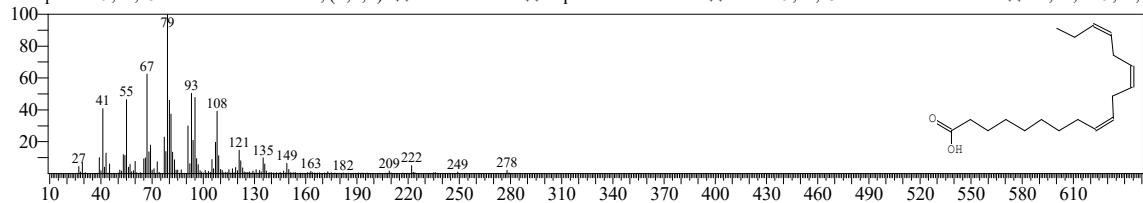

Hit#2 Entry:32465 Library:NIST20R.lib

SI:89 Formula:C18H32O CAS:506-44-5 MolWeight:264 RetIndex:2077

CompName:9,12,15-Octadecatrien-1-ol, (Z,Z,Z)- \$\$ (9E,12E,15E)-9,12,15-Octadecatrien-1-ol # \$\$ (Z,Z,Z)-9,12,15-Octadecatrien-1-ol

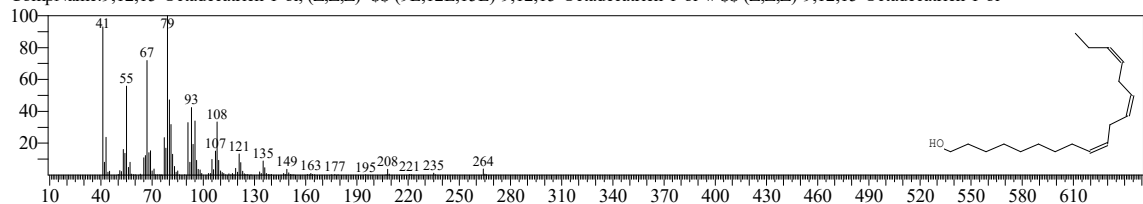

Hit#3 Entry:87848 Library:NIST20M1.lib

SI:89 Formula:C16H26O CAS:56797-43-4 MolWeight:234 RetIndex:1824

CompName:cis,cis,cis-7,10,13-Hexadecatrienal \$\$ (7Z,10Z,13Z)-7,10,13-Hexadecatrienal #

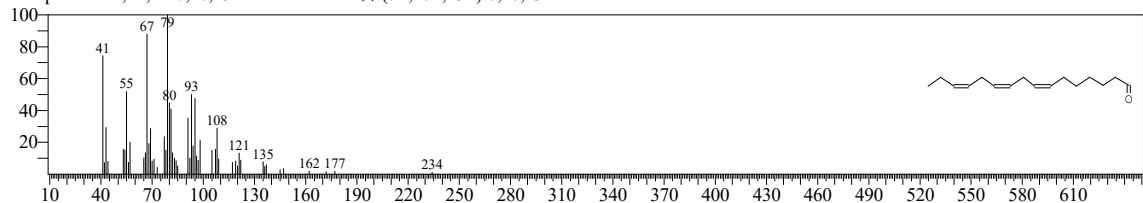

Hit#4 Entry:35226 Library:NIST20R.lib

SI:88 Formula:C19H32O2 CAS:301-00-8 MolWeight:292 RetIndex:2101

CompName:9,12,15-Octadecatrienoic acid, methyl ester, (Z,Z,Z)- \$\$ Linolenic acid, methyl ester \$\$ Methyl all-cis-9,12,15-octadecatrienoate \$\$ Methyl lino

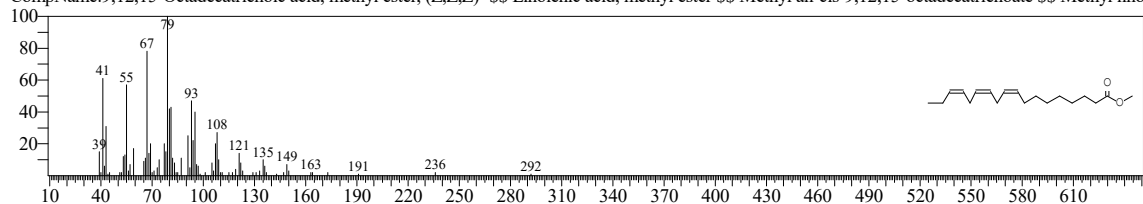

Hit#5 Entry:171056 Library:NIST20M1.lib

SI:88 Formula:C20H34O2 CAS:17046-59-2 MolWeight:306 RetIndex:2390

CompName:Eicosatrienoic acid, 11(Z),14(Z),17(Z)

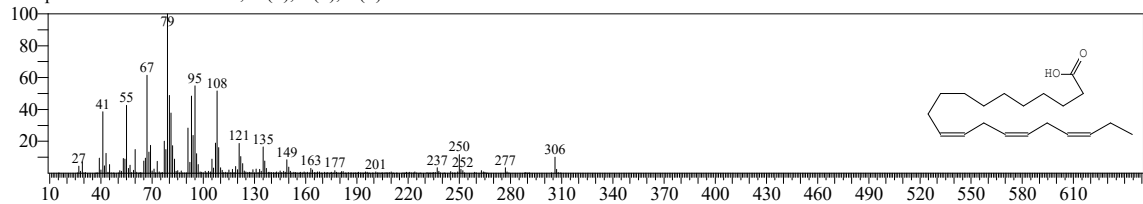

# TNAU

<< Target >>

Line#:10 R.Time:45.635(Scan#:8128) MassPeaks:442

RawMode:Averaged 45.630-45.640(8127-8129) BasePeak:139.10(4926)

BG Mode:Calc. from Peak Group 1 - Event 1 Q3 Scan

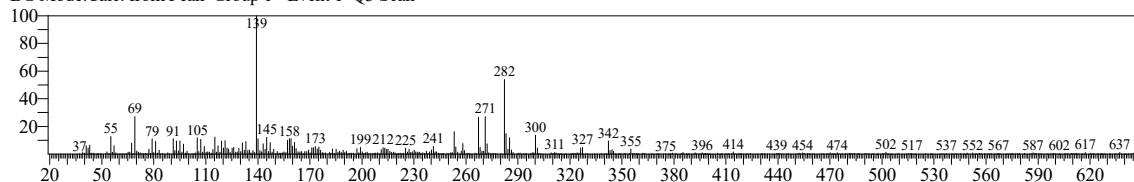

Hit#:1 Entry:8297 Library:NIST20M2.lib

SI:90 Formula:C27H42O3 CAS:512-04-9 MolWeight:414 RetIndex:2844

CompName:Diosgenin \$\$ Spirost-5-en-3-ol, (3.beta.,25R)- \$\$ Spirost-5-en-3.beta.-ol, (25R)- \$\$ Nitrogenin \$\$ 25D-spirost-5-en-3.beta.-ol \$\$ Spiro(8H-nap

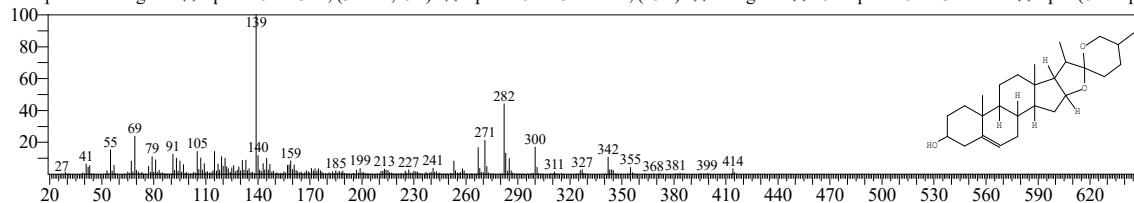

Hit#:2 Entry:14852 Library:NIST20M2.lib

SI:82 Formula:C28H44O3 CAS:116292-24-1 MolWeight:428 RetIndex:2793

CompName:Diosgenin methyl ether \$\$ Diosgenin Me derivative \$\$ (3.beta.,25R)-3-Methoxyspirost-5-ene \$\$ Spirost-5-ene, 3-methoxy-, (3.beta.,25R)-

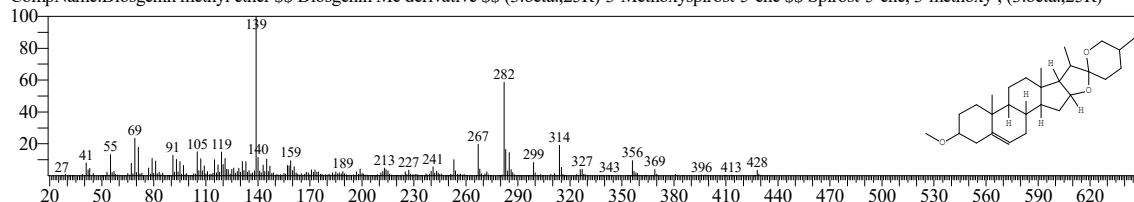

Hit#:3 Entry:24878 Library:NIST20M2.lib

SI:81 Formula:C29H44O4 CAS:1061-54-7 MolWeight:456 RetIndex:2984

CompName:Spirost-5-en-3-ol, acetate, (3.beta.,25R)- \$\$ Diosgenin acetate \$\$ Spirost-5-en-3.beta.-ol, acetate, (25R)- \$\$ Spirost-5-en-3.beta.-ol, acetate, (2-

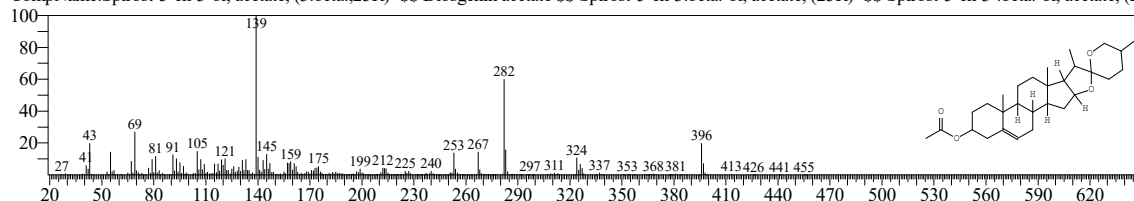

Hit#:4 Entry:41561 Library:NIST20R.lib

SI:80 Formula:C27H42O2 CAS:32277-73-9 MolWeight:398 RetIndex:2713

CompName:Des-N-solasodine \$\$ Furosta-5,20(22)-dien-3-ol #

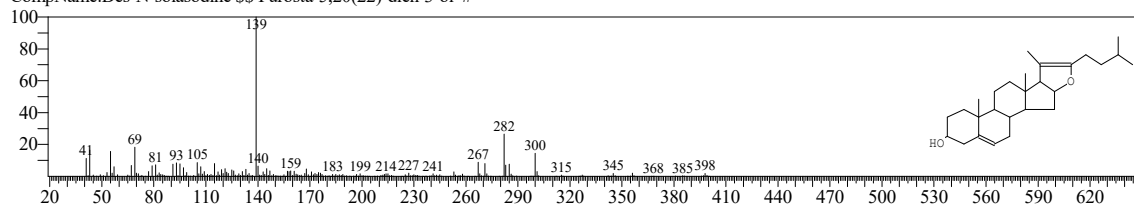

Hit#:5 Entry:42677 Library:NIST20R.lib

SI:76 Formula:C29H44O4 CAS:1180-12-7 MolWeight:456 RetIndex:2984

CompName:Neodiosgenin (3.beta.,25S) acetate \$\$ Spirost-5-en-3-ol, 3-acetate, (3.beta.,25S)- \$\$ Spirost-5-en-3-ol, acetate, (3.beta.,25S)- \$\$ Spirost-5-en-3-

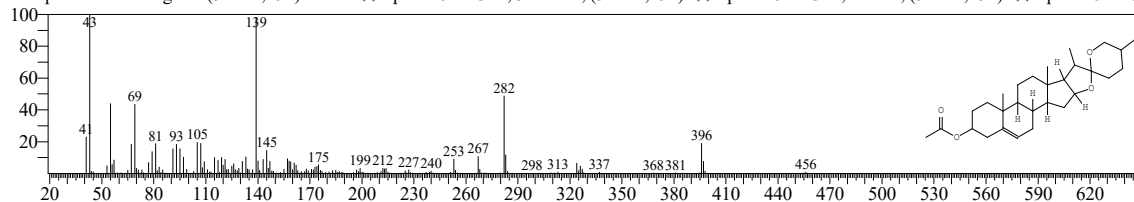

Supplement: Supplementary file 42 [file supplementary]
