# Supplementary material for: Comparative Metabolomics Profiling Reveals Key Metabolites and Associated Pathways Regulating Tuber Dormancy in White Yam (<em>Dioscorea rotundata</em>)
Source: Preprints.org preprint supplement (doi:10.20944/preprints202303.0378.v1), 2023-03-21

# TNAU

## Sample Information

Analyzed by : Admin  
 Analyzed : 05-Aug-22 4:36:32 AM  
 Sample Type : Unknown  
 Level # : 1  
 Sample Name : C143-3  
 Sample ID : C143-3  
 IS Amount : [1]=1  
 Sample Amount : 1  
 Dilution Factor : 1  
 Vial # : 19  
 Injection Volume : 1.00  
 Data File : D:\GCMS-8040NX\Aug 2022\Users\04.08.2022\Data files\04082022-019.qgd  
 Org Data File : D:\GCMS-8040NX\Aug 2022\Users\04.08.2022\Data files\04082022-019.qgd  
 Method File : D:\GCMS-8040NX\Aug 2022\Users\04.08.2022\Method file\27072022\_methodfile.qgm  
 Org Method File : D:\GCMS-8040NX\Aug 2022\Users\04.08.2022\Method file\27072022\_methodfile.qgm  
 Report File :  
 Tuning File : D:\GCMS-8040NX\Aug 2022\Tuning Data\TUNING 04082022.qgt  
 [Comment]  
 Jerry samples  
 Modified by : Admin  
 Modified : 05-Aug-22 4:34:21 PM

Chromatogram C143-3 D:\GCMS-8040NX\Aug 2022\Users\04.08.2022\Data files\04082022-019.qgd

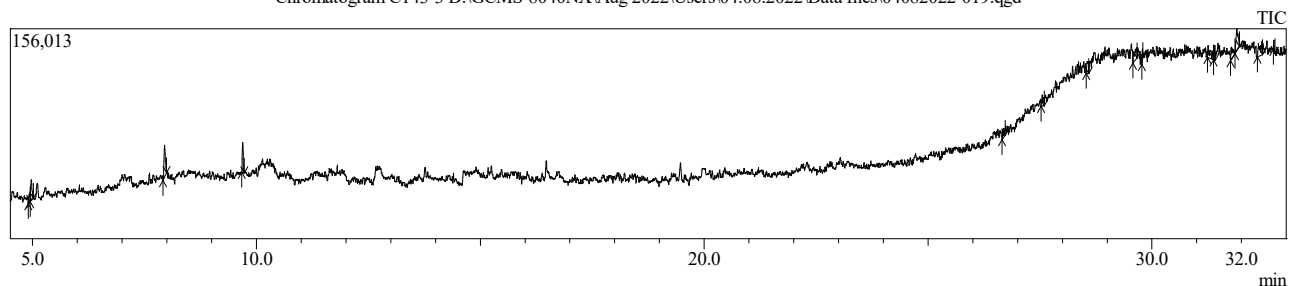

Peak Report TIC

| Peak# | R.Time | Area   | Area%  | Height | Height% | A/H  | Similarity | Name                            |
|-------|--------|--------|--------|--------|---------|------|------------|---------------------------------|
| 1     | 4.915  | 14131  | 3.60   | 4774   | 2.84    | 2.96 | 29         | 3-Hydroxybenzoic acid-2TMS      |
| 2     | 4.970  | 32901  | 8.38   | 15426  | 9.17    | 2.13 | 48         | Methyl butanoate                |
| 3     | 7.948  | 49389  | 12.58  | 23593  | 14.02   | 2.09 | 86         | Tridecane                       |
| 4     | 9.692  | 34637  | 8.82   | 22330  | 13.27   | 1.55 | 88         | Undecane                        |
| 5     | 26.665 | 13505  | 3.44   | 6514   | 3.87    | 2.07 | 32         | 3,4-Dihydroxymandelic acid-4TMS |
| 6     | 27.545 | 15738  | 4.01   | 7854   | 4.67    | 2.00 | 34         | 3,4-Dihydroxymandelic acid-4TMS |
| 7     | 28.553 | 21652  | 5.51   | 8956   | 5.32    | 2.42 | 29         | 3,4-Dihydroxymandelic acid-4TMS |
| 8     | 29.655 | 29702  | 7.56   | 8190   | 4.87    | 3.63 | 38         | 3,4-Dihydroxymandelic acid-4TMS |
| 9     | 29.789 | 8238   | 2.10   | 8884   | 5.28    | 0.93 | 40         | 3,4-Dihydroxymandelic acid-4TMS |
| 10    | 31.250 | 37290  | 9.49   | 8064   | 4.79    | 4.62 | 40         | Hypoxanthine-2TMS               |
| 11    | 31.389 | 12066  | 3.07   | 10761  | 6.39    | 1.12 | 36         | Galactose-5TMS(2)               |
| 12    | 31.770 | 23284  | 5.93   | 8729   | 5.19    | 2.67 | 34         | Homogentisic acid-3TMS          |
| 13    | 31.898 | 51086  | 13.01  | 16088  | 9.56    | 3.18 | 37         | Urocanic acid-2TMS              |
| 14    | 32.458 | 40512  | 10.31  | 10306  | 6.12    | 3.93 | 35         | Epinephrine-3TMS                |
| 15    | 32.722 | 8624   | 2.20   | 7813   | 4.64    | 1.10 | 36         | 3,4-Dihydroxymandelic acid-4TMS |
|       |        | 392755 | 100.00 | 168282 | 100.00  |      |            |                                 |

Library

# TNAU

<< Target >>

Line#:1 R.Time:4.915(Scan#:84) MassPeaks:291

RawMode:Averaged 4.910-4.920(83-85) BasePeak:40.00(768)

BG Mode:Calc. from Peak Group 1 - Event 1 Q3 Scan

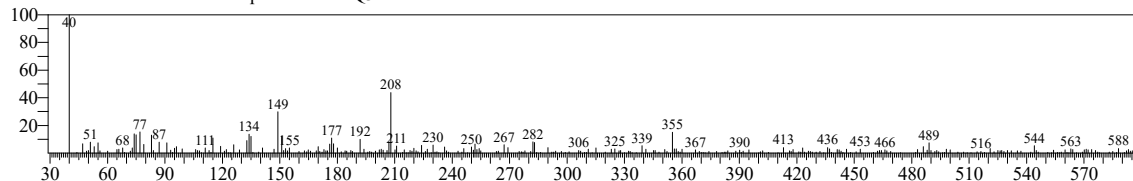

Hit#:1 Entry:179 Library:OA\_TMS\_DB5\_67min\_V3.lib

SI:29 Formula:C<sub>13</sub>H<sub>22</sub>O<sub>3</sub>Si<sub>2</sub> CAS:99-06-9 MolWeight:282 RetIndex:1572

CompName:3-Hydroxybenzoic acid-2TMS ; 3-hydroxybenzoic acid

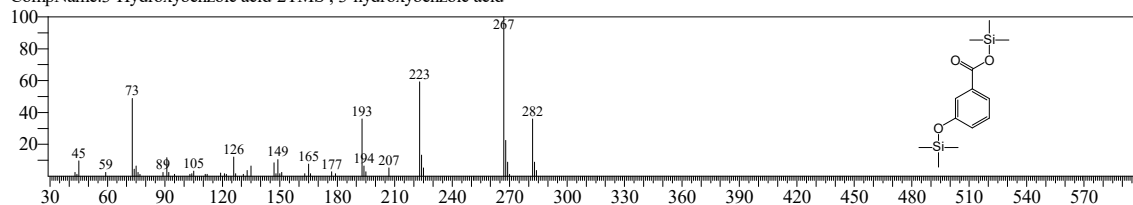

Hit#:2 Entry:3 Library:FA\_ME\_SP2560\_EI\_V3.lib

SI:28 Formula:C<sub>9</sub>H<sub>18</sub>O<sub>2</sub> CAS:124-07-2 MolWeight:158 RetIndex:1550

CompName:Methyl caprylate ; Octanoic acid

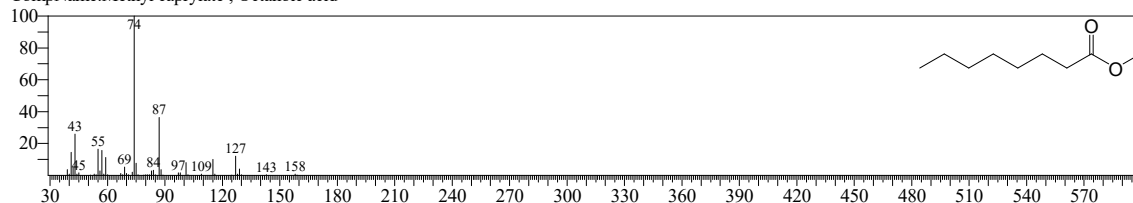

Hit#:3 Entry:7 Library:OA\_TMS\_DB5\_67min\_V3.lib

SI:28 Formula:C<sub>9</sub>H<sub>14</sub>O<sub>3</sub>Si CAS:108-95-2 MolWeight:166 RetIndex:1060

CompName:Phenol-TMS ; phenol

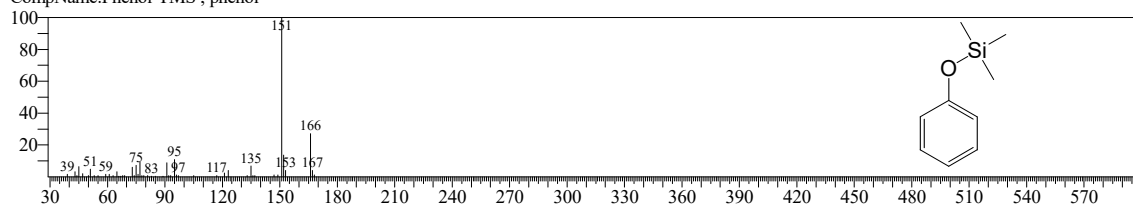

Hit#:4 Entry:4 Library:FA\_ME\_SP2560\_EI\_V3.lib

SI:28 Formula:C<sub>11</sub>H<sub>22</sub>O<sub>2</sub> CAS:334-48-5 MolWeight:186 RetIndex:1767

CompName:Methyl caprate ; Decanoic acid

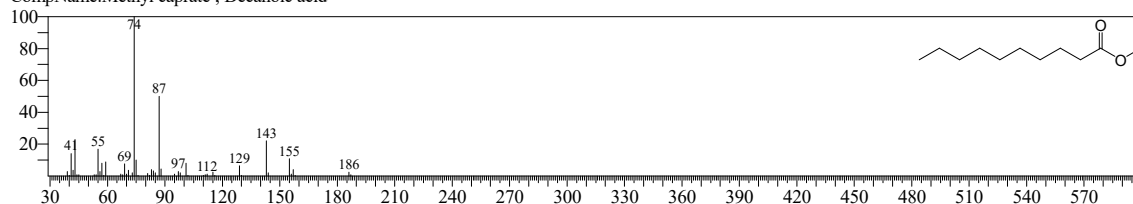

Hit#:5 Entry:5 Library:FA\_ME\_SP2560\_EI\_V3.lib

SI:28 Formula:C<sub>12</sub>H<sub>24</sub>O<sub>2</sub> CAS:112-37-8 MolWeight:200 RetIndex:1875

CompName:Methyl undecanoate ; Undecanoic acid

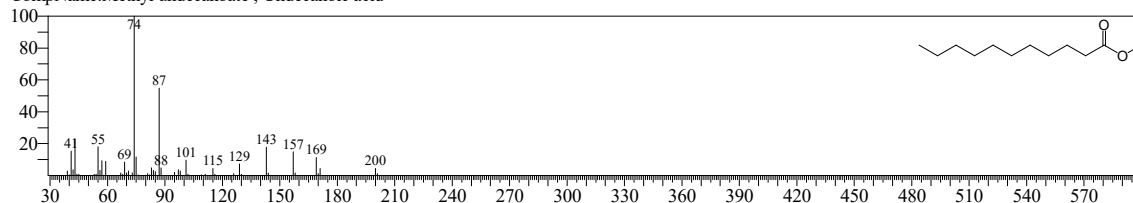

# TNAU

<< Target >>

Line#:2 R.Time:4.970(Scan#:95) MassPeaks:297

RawMode:Averaged 4.965-4.975(94-96) BasePeak:89.10(2098)

BG Mode:Calc. from Peak Group 1 - Event 1 Q3 Scan

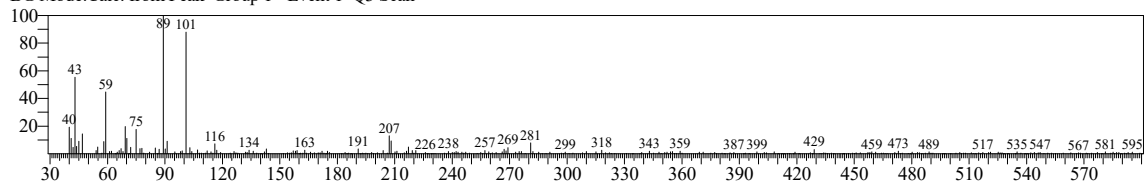

Hit#:1 Entry:1 Library:FA\_ME\_SP2560\_EI\_V3.lib

SI:48 Formula:C5H10O2 CAS:107-92-6 MolWeight:102 RetIndex:1113

CompName:Methyl butanoate ; Butanoic acid

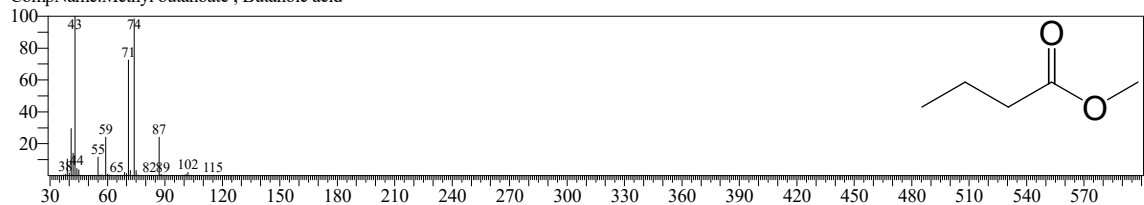

Hit#:2 Entry:1 Library:OA\_TMS\_DB5\_67min\_V3.lib

SI:43 Formula:C7H17NO2Si CAS:1118-68-9 MolWeight:175 RetIndex:990

CompName:Dimethylglycine-TMS ; 2-(dimethylamino)acetic acid

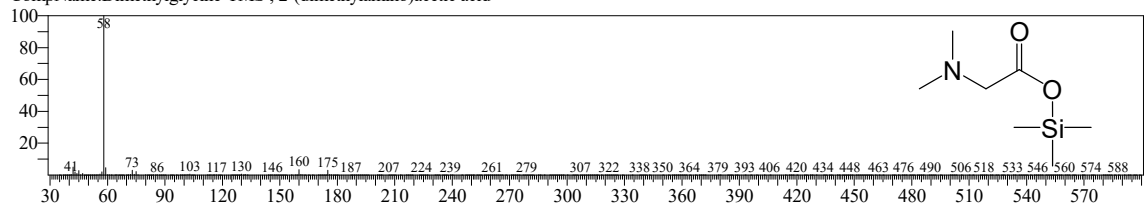

Hit#:3 Entry:11 Library:OA\_TMS\_DB5\_67min\_V3.lib

SI:42 Formula:C9H20O2Si CAS:142-62-1 MolWeight:188 RetIndex:1071

CompName:Caproic acid-TMS ; hexanoic acid

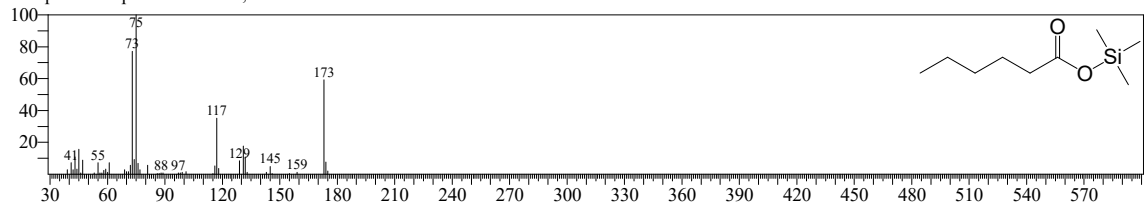

Hit#:4 Entry:456 Library:OA\_TMS\_DB5\_67min\_V3.lib

SI:38 Formula:C18H33NO3Si CAS:37350-58-6 MolWeight:339 RetIndex:2094

CompName:Metoprolol-TMS ; 1-[4-(2-methoxyethyl)phenoxy]-3-(propan-2-ylamino)propan-2-ol

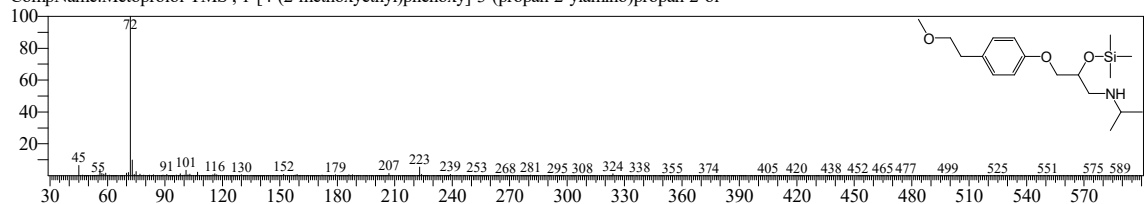

Hit#:5 Entry:223 Library:OA\_TMS\_DB5\_67min\_V3.lib

SI:36 Formula:C15H32O2Si CAS:143-07-7 MolWeight:272 RetIndex:1653

CompName:Lauric acid-TMS ; dodecanoic acid

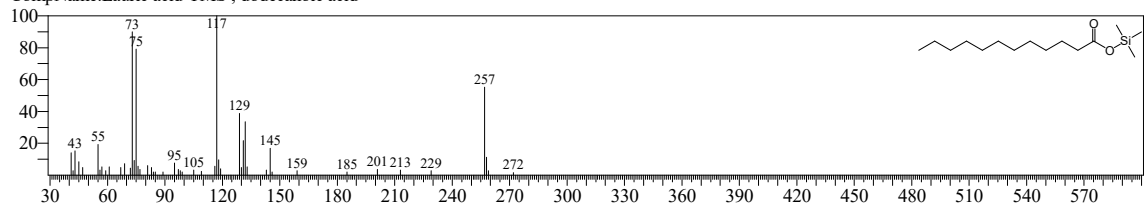

# TNAU

<< Target >>

Line#3 R.Time:7.945(Scan#:690) MassPeaks:301

RawMode:Averaged 7.940-7.950(689-691) BasePeak:57.05(5027)

BG Mode:Calc. from Peak Group 1 - Event 1 Q3 Scan

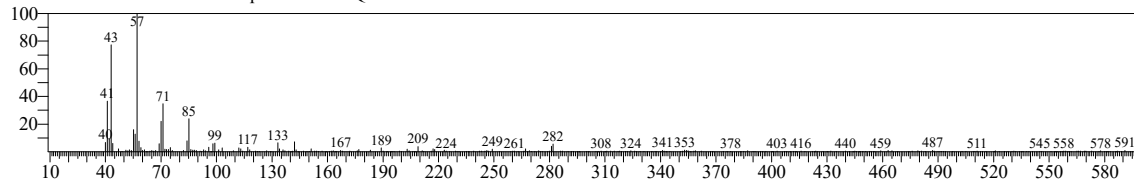

Hit#1 Entry:40226 Library:NIST20M1.lib

SI:86 Formula:C13H28 CAS:629-50-5 MolWeight:184 RetIndex:1300

CompName:Tridecane \$\$ n-Tridecane \$\$ Tridecane, n-

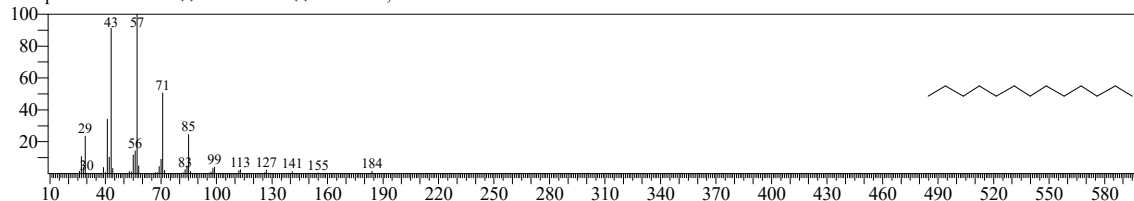

Hit#2 Entry:9443 Library:NIST20R.lib

SI:86 Formula:C10H22 CAS:124-18-5 MolWeight:142 RetIndex:1000

CompName:Decane \$\$ n-Decane \$\$ n-C10H22 \$\$ UN 2247

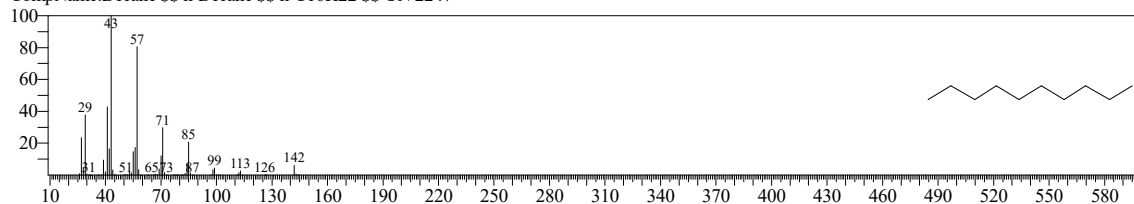

Hit#3 Entry:21042 Library:NIST20M1.lib

SI:86 Formula:C11H24 CAS:1120-21-4 MolWeight:156 RetIndex:1100

CompName:Undecane \$\$ n-Undecane \$\$ Hendecane \$\$ n-C11H24 \$\$ UN 2330

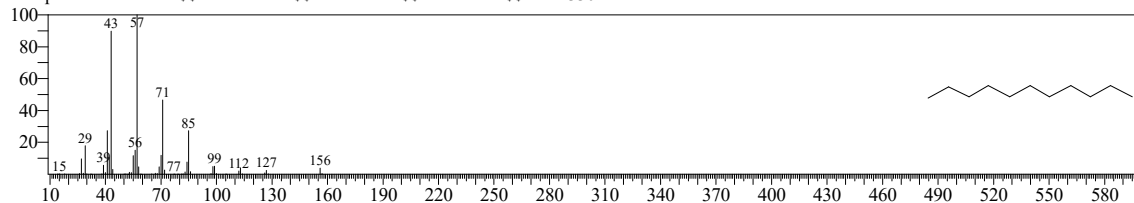

Hit#4 Entry:13607 Library:NIST20M1.lib

SI:86 Formula:C10H22 CAS:15869-89-3 MolWeight:142 RetIndex:887

CompName:Octane, 2,5-dimethyl- \$\$ 2,5-Dimethyloctane

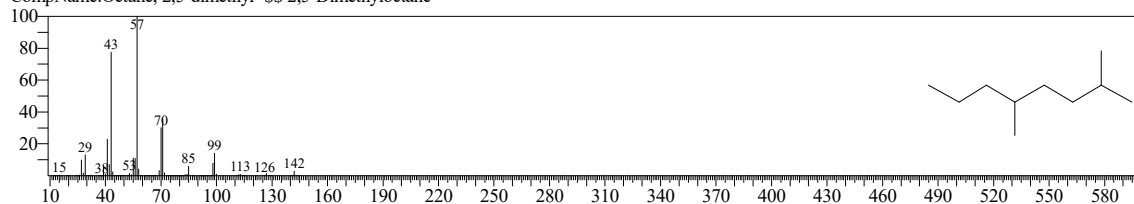

Hit#5 Entry:30057 Library:NIST20M1.lib

SI:85 Formula:C12H26 CAS:112-40-3 MolWeight:170 RetIndex:1200

CompName:Dodecane \$\$ n-Dodecane \$\$ Adakane 12 \$\$ Ba 51-090453 \$\$ CH3(CH2)10CH3 \$\$ Bihexyl \$\$ Dihexyl \$\$ Duodecane \$\$ NSC 8714

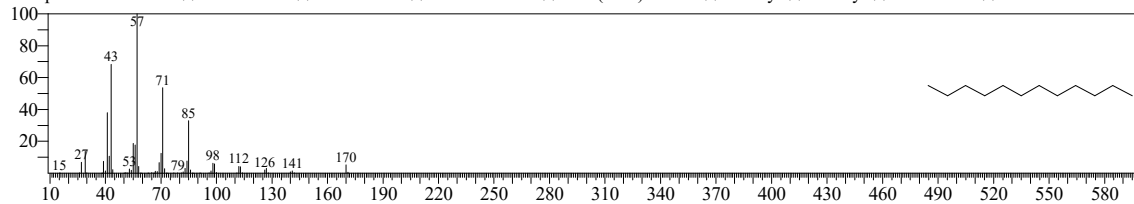

# TNAU

<< Target >>

Line#:4 R.Time:9.690(Scan#:1039) MassPeaks:256

RawMode:Averaged 9.685-9.695(1038-1040) BasePeak:57.10(4608)

BG Mode:Calc. from Peak Group 1 - Event 1 Q3 Scan

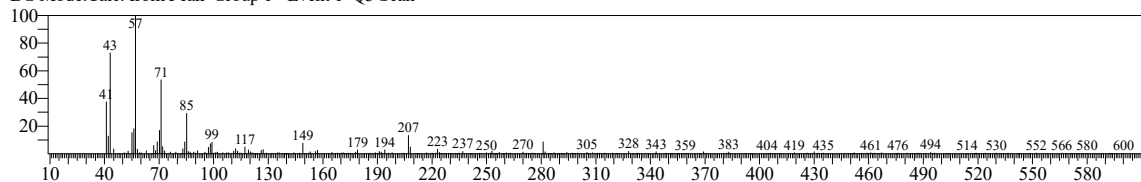

Hit#:1 Entry:12898 Library:NIST20R.lib

SI:88 Formula:C11H24 CAS:1120-21-4 MolWeight:156 RetIndex:1100

CompName:Undecane \$\$ n-Undecane \$\$ Hendecane \$\$ n-C11H24 \$\$ UN 2330

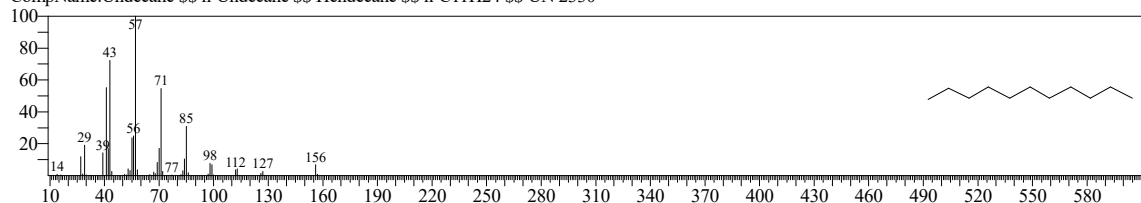

Hit#:2 Entry:30057 Library:NIST20M1.lib

SI:88 Formula:C12H26 CAS:112-40-3 MolWeight:170 RetIndex:1200

CompName:Dodecane \$\$ n-Dodecane \$\$ Adakane 12 \$\$ Ba 51-090453 \$\$ CH3(CH2)10CH3 \$\$ Bihexyl \$\$ Dihexyl \$\$ Duodecane \$\$ NSC 8714

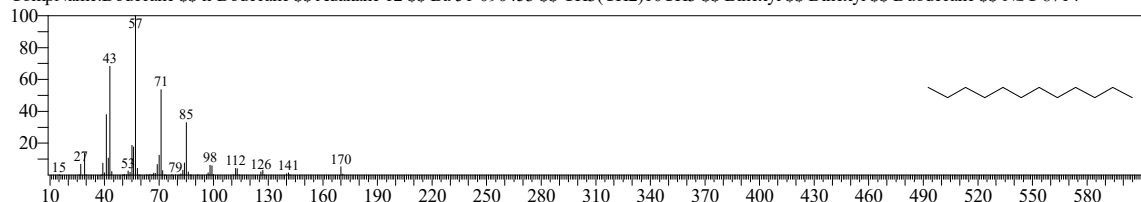

Hit#:3 Entry:19410 Library:NIST20R.lib

SI:87 Formula:C13H28 CAS:629-50-5 MolWeight:184 RetIndex:1300

CompName:Tridecane \$\$ n-Tridecane \$\$ Tridecane, n-

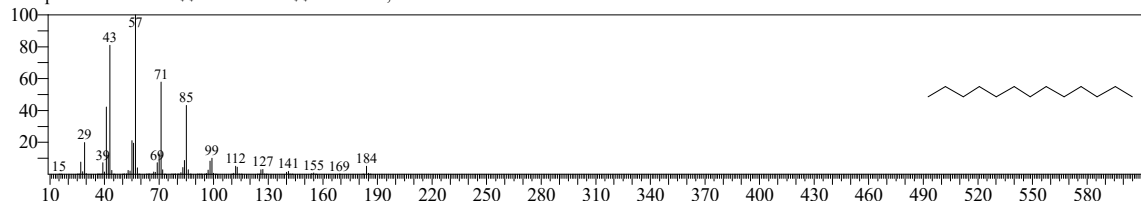

Hit#:4 Entry:25291 Library:NIST20R.lib

SI:87 Formula:C15H32 CAS:31295-56-4 MolWeight:212 RetIndex:1320

CompName:Dodecane, 2,6,11-trimethyl- \$\$ 2,6,11-Trimethyldodecane

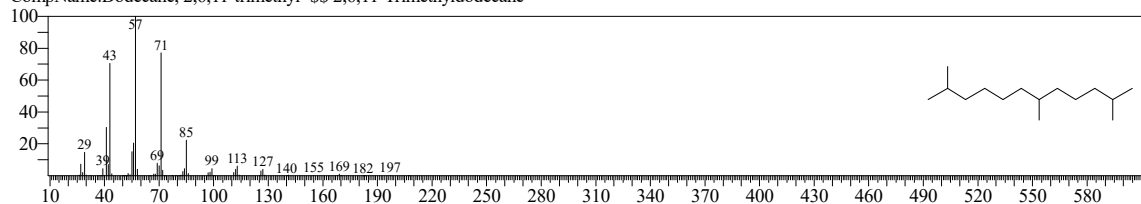

Hit#:5 Entry:22497 Library:NIST20R.lib

SI:87 Formula:C14H30 CAS:629-59-4 MolWeight:198 RetIndex:1400

CompName:Tetradecane \$\$ n-Tetradecane

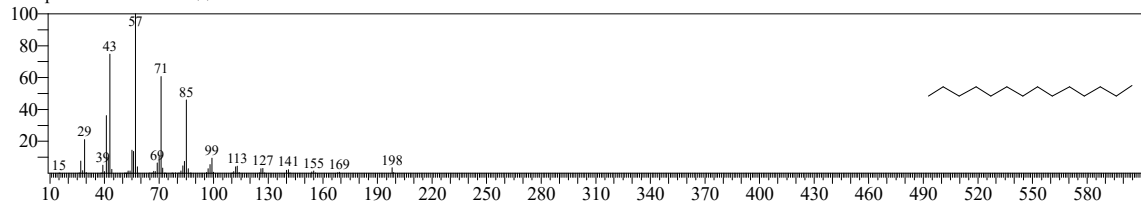

# TNAU

<< Target >>

Line#:5 R.Time:26.665(Scan#:4434) MassPeaks:314

RawMode:Averaged 26.660-26.670(4433-4435) BasePeak:207.05(871)

BG Mode:Calc. from Peak Group 1 - Event 1 Q3 Scan

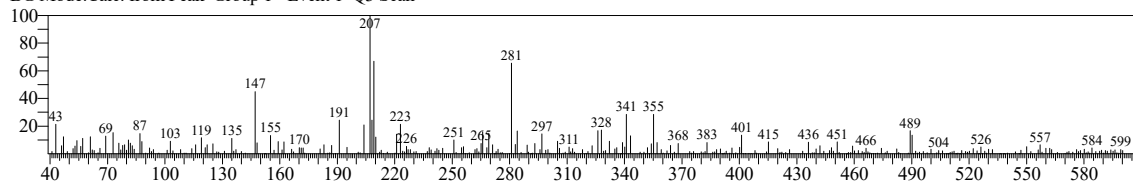

Hit#:1 Entry:402 Library:OA\_TMS\_DB5\_67min\_V3.lib

SI:32 Formula:C20H42O4Si4 CAS:775-01-9 MolWeight:458 RetIndex:1942

CompName:3,4-Dihydroxymandelic acid-4TMS ; 2-(3,4-dihydroxyphenyl)-2-hydroxyacetic acid

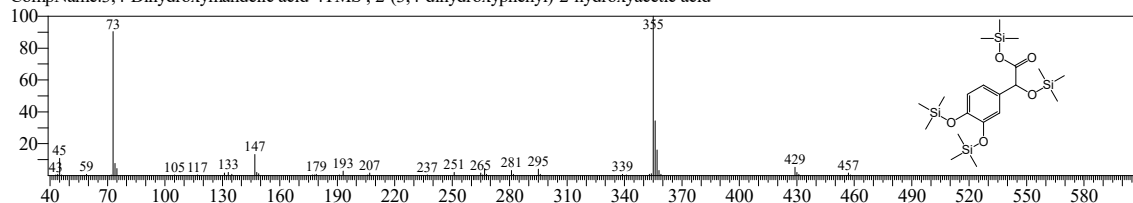

Hit#:2 Entry:267 Library:OA\_TMS\_DB5\_67min\_V3.lib

SI:30 Formula:C17H42O5Si4 CAS:58-86-6 MolWeight:438 RetIndex:1732

CompName:Xylose-4TMS(1) ; (2R,3S,4R)-2,3,4,5-tetrahydroxypentanal

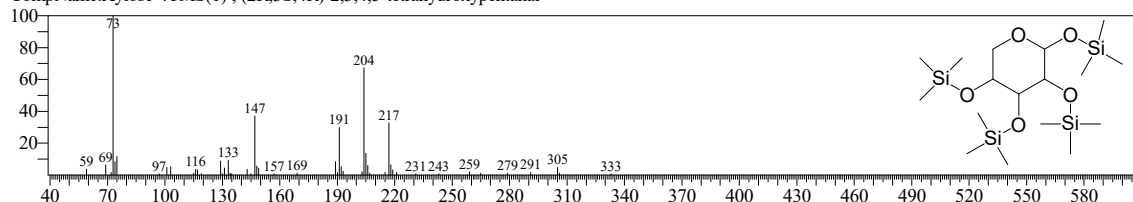

Hit#:3 Entry:528 Library:OA\_TMS\_DB5\_67min\_V3.lib

SI:30 Formula:C17H28Cl2N2O5Si2 CAS:56-75-7 MolWeight:466 RetIndex:2508

CompName:Chloramphenicol-2TMS ; 2,2-dichloro-N-[(1R,2R)-1,3-dihydroxy-1-(4-nitrophenyl)propan-2-yl]acetamide

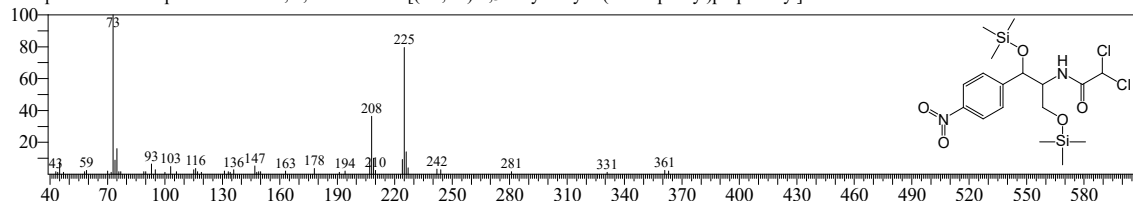

Hit#:4 Entry:294 Library:OA\_TMS\_DB5\_67min\_V3.lib

SI:30 Formula:C15H26O4Si2 CAS:306-08-1 MolWeight:326 RetIndex:1782

CompName:Homovanillic acid-2TMS ; 2-(4-hydroxy-3-methoxyphenyl)acetic acid

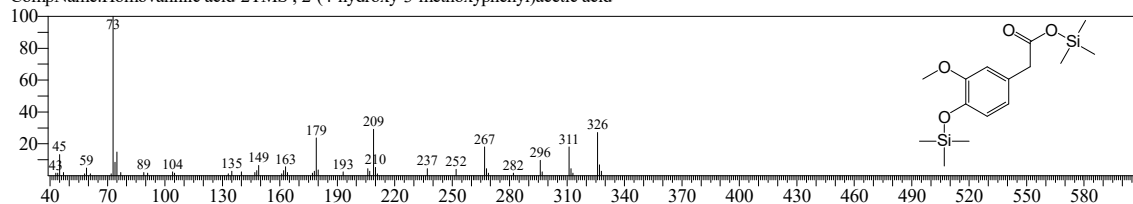

Hit#:5 Entry:349 Library:OA\_TMS\_DB5\_67min\_V3.lib

SI:29 Formula:C21H52O6Si5 CAS:2595-97-3 MolWeight:540 RetIndex:1874

CompName:Allose-5TMS ; (2R,3R,4R,5R)-2,3,4,5,6-pentahydroxyhexanal

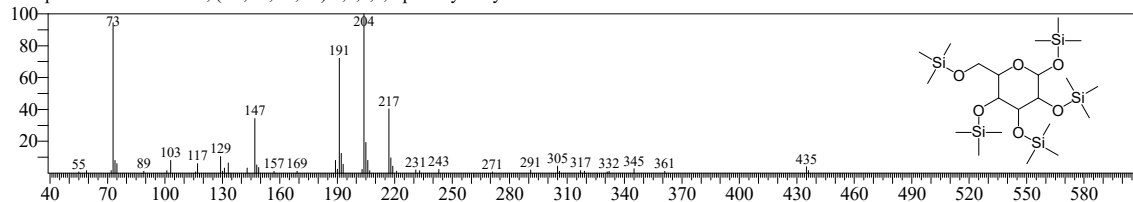

<< Target >>

Line#:6 R.Time:27.545(Scan#:4610) MassPeaks:284

RawMode:Averaged 27.540-27.550(4609-4611) BasePeak:207.05(1676)

BG Mode:Calc. from Peak Group 1 - Event 1 Q3 Scan

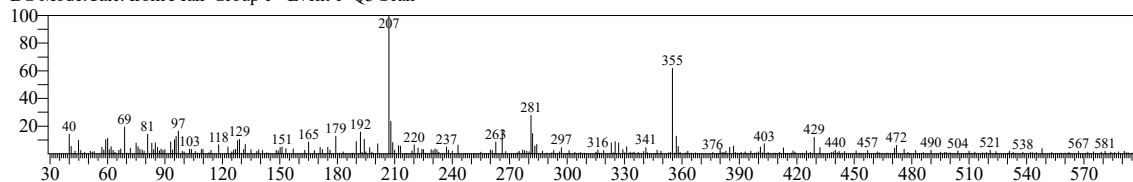

Hit#:1 Entry:402 Library:OA\_TMS\_DB5\_67min\_V3.lib

SI:34 Formula:C<sub>20</sub>H<sub>42</sub>O<sub>4</sub>Si<sub>4</sub> CAS:775-01-9 MolWeight:458 RetIndex:1942

CompName:3,4-Dihydroxymandelic acid-4TMS ; 2-(3,4-dihydroxyphenyl)-2-hydroxyacetic acid

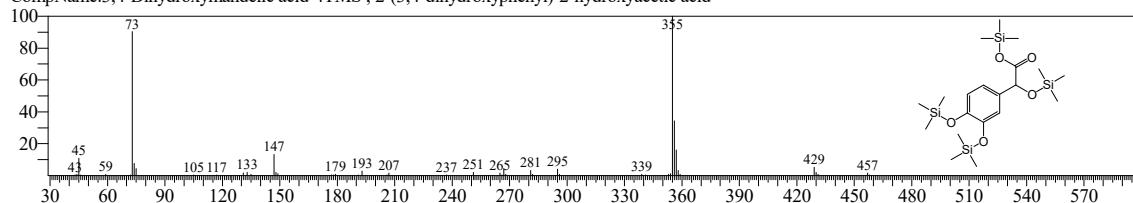

Hit#:2 Entry:477 Library:OA\_TMS\_DB5\_67min\_V3.lib

SI:25 Formula:C<sub>21</sub>H<sub>46</sub>O<sub>Si</sub> CAS:112-92-5 MolWeight:342 RetIndex:2156

CompName:Octadecanol-TMS ; octadecan-1-ol

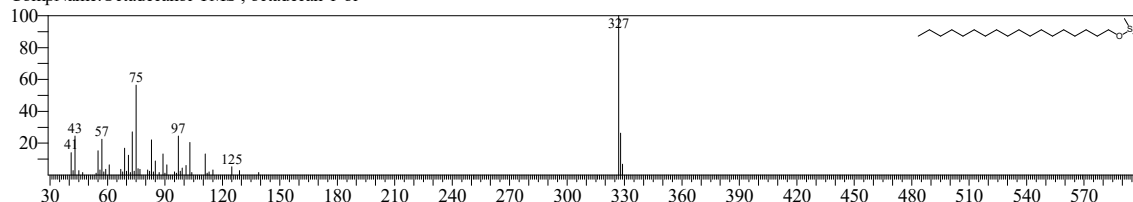

Hit#:3 Entry:558 Library:OA\_TMS\_DB5\_67min\_V3.lib

SI:25 Formula:C<sub>19</sub>H<sub>39</sub>N<sub>2</sub>O<sub>8</sub>PSi<sub>3</sub> CAS:365-07-1 MolWeight:538 RetIndex:2905

CompName:Thymidine monophosphate-3TMS ; [(2R,3S,5R)-3-hydroxy-5-(5-methyl-2,4-dioxypyrimidin-1-yl)oxolan-2-yl]methyl dihydrogen phosph

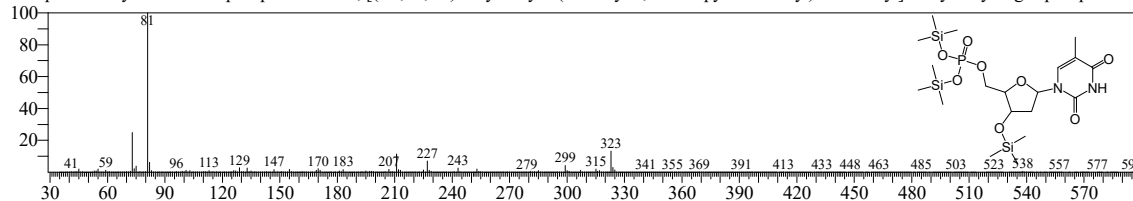

Hit#:4 Entry:329 Library:OA\_TMS\_DB5\_67min\_V3.lib

SI:25 Formula:C<sub>11</sub>H<sub>27</sub>NO<sub>4</sub>SSi<sub>2</sub> CAS:820-10-0 MolWeight:325 RetIndex:1848

CompName:Methionine sulfone-2TMS ; 2-amino-4-methylsulfonylbutanoic acid

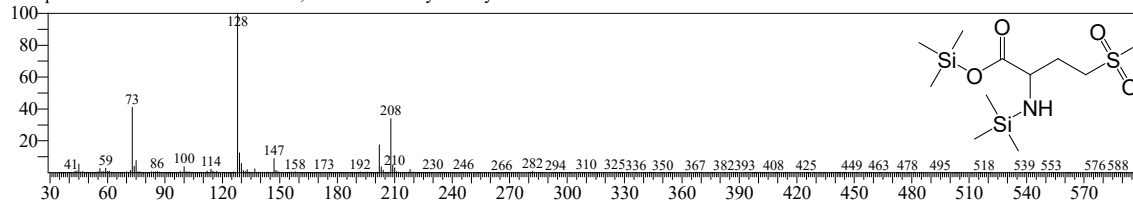

Hit#:5 Entry:382 Library:OA\_TMS\_DB5\_67min\_V3.lib

SI:24 Formula:C<sub>18</sub>H<sub>34</sub>O<sub>4</sub>Si<sub>3</sub> CAS:6482-98-0 MolWeight:398 RetIndex:1918

CompName:4-Hydroxyphenyllactic acid-3TMS ; 2-hydroxy-3-(4-hydroxyphenyl)propanoate

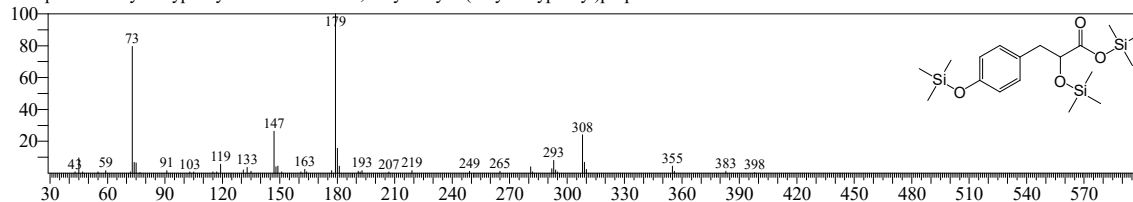

# TNAU

<< Target >>

Line#:7 R.Time:28.555(Scan#:4812) MassPeaks:333

RawMode:Averaged 28.550-28.560(4811-4813) BasePeak:96.10(829)

BG Mode:Calc. from Peak Group 1 - Event 1 Q3 Scan

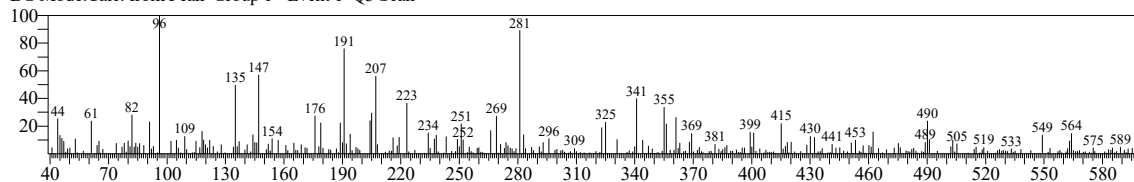

Hit#:1 Entry:402 Library:OA\_TMS\_DB5\_67min\_V3.lib

SI:29 Formula:C20H42O4Si4 CAS:775-01-9 MolWeight:458 RetIndex:1942

CompName:3,4-Dihydroxymandelic acid-4TMS ; 2-(3,4-dihydroxyphenyl)-2-hydroxyacetic acid

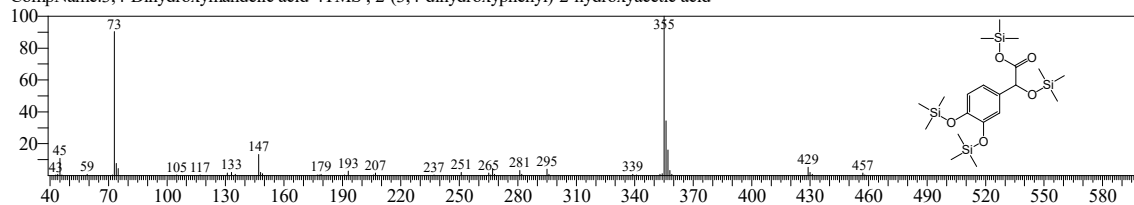

Hit#:2 Entry:349 Library:OA\_TMS\_DB5\_67min\_V3.lib

SI:25 Formula:C21H52O6Si5 CAS:2595-97-3 MolWeight:540 RetIndex:1874

CompName:Allose-5TMS ; (2R,3R,4R,5R)-2,3,4,5,6-pentahydroxyhexanal

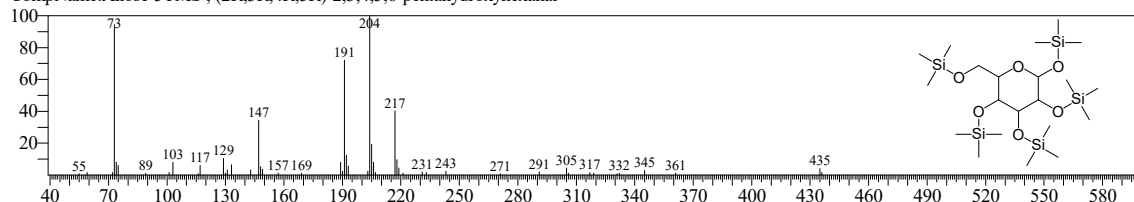

Hit#:3 Entry:345 Library:OA\_TMS\_DB5\_67min\_V3.lib

SI:25 Formula:C21H52O6Si5 CAS:59-23-4 MolWeight:540 RetIndex:1868

CompName:Galactose-5TMS(2) ; (3R,4S,5R,6R)-6-(hydroxymethyl)oxane-2,3,4,5-tetrol

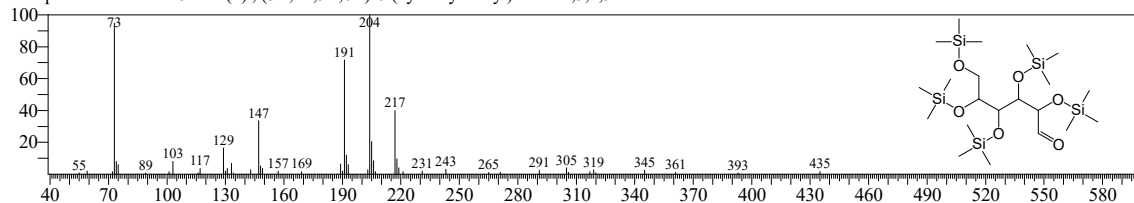

Hit#:4 Entry:437 Library:OA\_TMS\_DB5\_67min\_V3.lib

SI:24 Formula:C21H52O6Si5 CAS:50-99-7 MolWeight:540 RetIndex:2002

CompName:Glucose-5TMS(2) ; (3R,4S,5S,6R)-6-(hydroxymethyl)oxane-2,3,4,5-tetrol

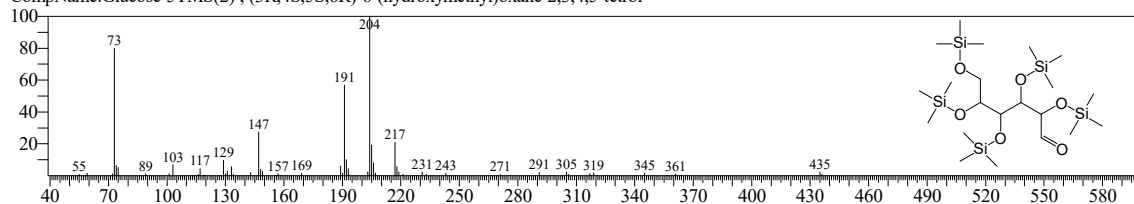

Hit#:5 Entry:348 Library:OA\_TMS\_DB5\_67min\_V3.lib

SI:23 Formula:C21H52O6Si5 CAS:3458-28-4 MolWeight:540 RetIndex:1872

CompName:Mannose-5TMS(2) ; (3S,4S,5S,6R)-6-(hydroxymethyl)oxane-2,3,4,5-tetrol

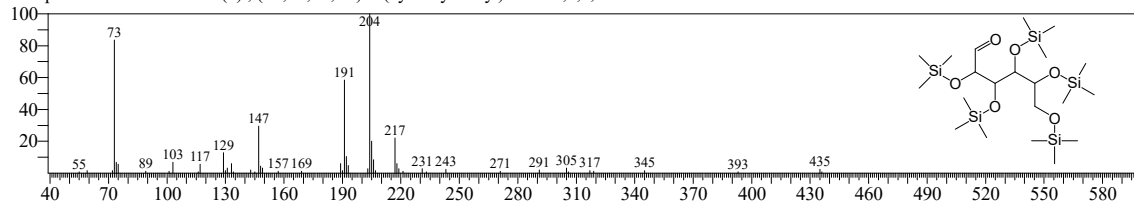



# TNAU

<< Target >>

Line#:8 R.Time:29.655(Scan#:5032) MassPeaks:283

RawMode:Averaged 29.650-29.660(5031-5033) BasePeak:207.05(1043)

BG Mode:Calc. from Peak Group 1 - Event 1 Q3 Scan

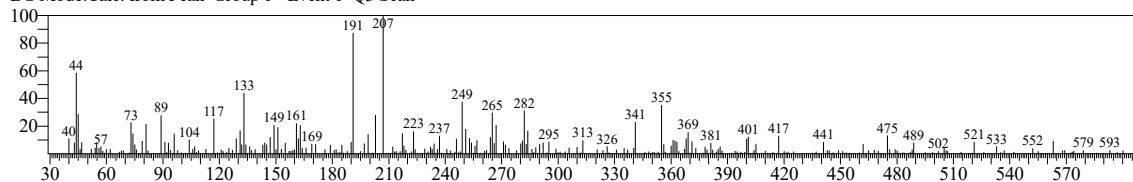

Hit#:1 Entry:402 Library:OA\_TMS\_DB5\_67min\_V3.lib

SI:38 Formula:C20H42O4Si4 CAS:775-01-9 MolWeight:458 RetIndex:1942

CompName:3,4-Dihydroxymandelic acid-4TMS ; 2-(3,4-dihydroxyphenyl)-2-hydroxyacetic acid

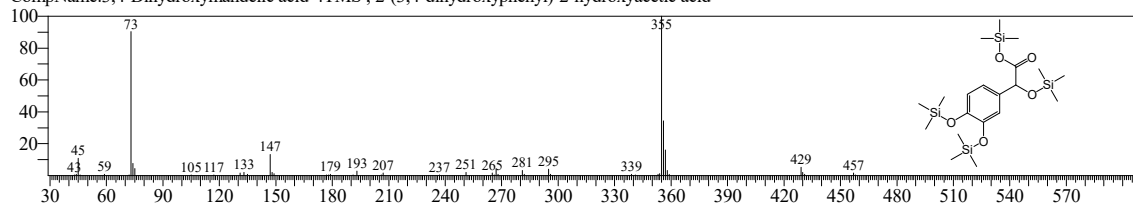

Hit#:2 Entry:211 Library:OA\_TMS\_DB5\_67min\_V3.lib

SI:37 Formula:C13H22O3Si2 CAS:99-96-7 MolWeight:282 RetIndex:1636

CompName:4-Hydroxybenzoic acid-2TMS ; 4-hydroxybenzoic acid

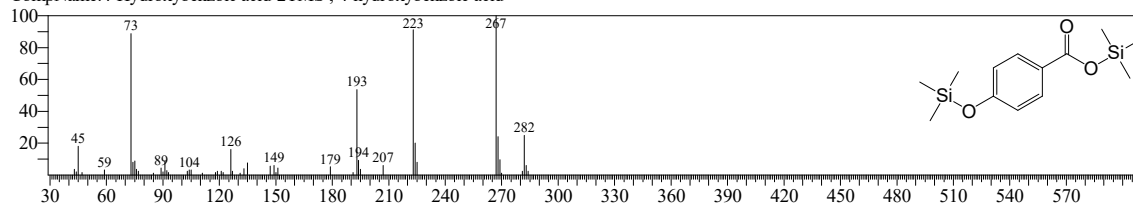

Hit#:3 Entry:343 Library:OA\_TMS\_DB5\_67min\_V3.lib

SI:37 Formula:C18H37NO3Si3 CAS:51-43-4 MolWeight:399 RetIndex:1868

CompName:Epinephrine-3TMS ; 4-[(1R)-1-hydroxy-2-(methylamino)ethyl]benzene-1,2-diol

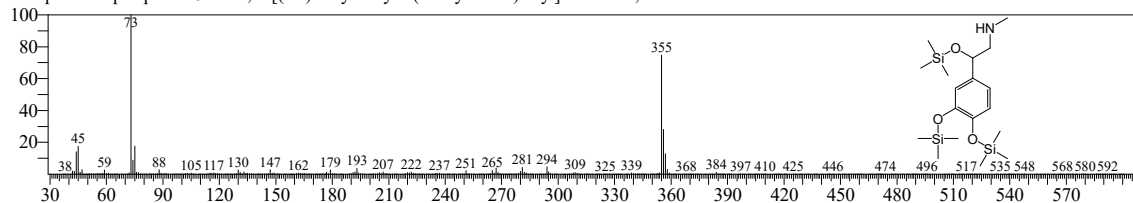

Hit#:4 Entry:77 Library:OA\_TMS\_DB5\_67min\_V3.lib

SI:36 Formula:C12H32O3Si3 CAS:56-81-5 MolWeight:308 RetIndex:1279

CompName:Glycerol-3TMS ; propane-1,2,3-triol

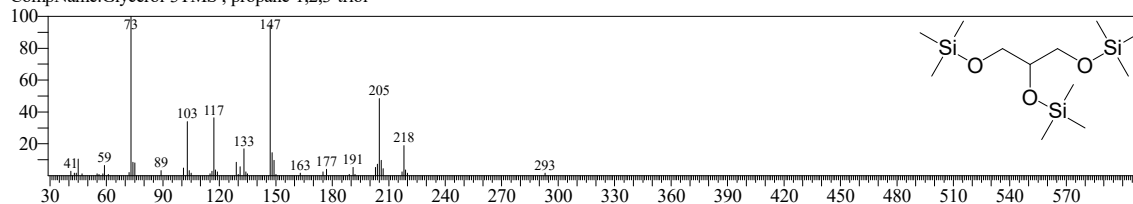

Hit#:5 Entry:179 Library:OA\_TMS\_DB5\_67min\_V3.lib

SI:35 Formula:C13H22O3Si2 CAS:99-06-9 MolWeight:282 RetIndex:1572

CompName:3-Hydroxybenzoic acid-2TMS ; 3-hydroxybenzoic acid

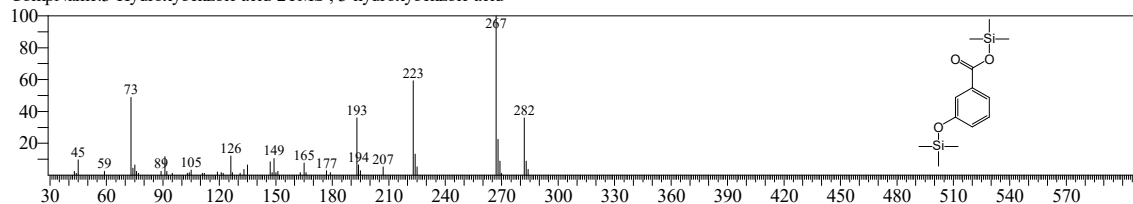

# TNAU

<< Target >>

Line#9 R.Time:29.790(Scan#:5059) MassPeaks:314

RawMode:Averaged 29.785-29.795(5058-5060) BasePeak:207.05(1353)

BG Mode:Calc. from Peak Group 1 - Event 1 Q3 Scan

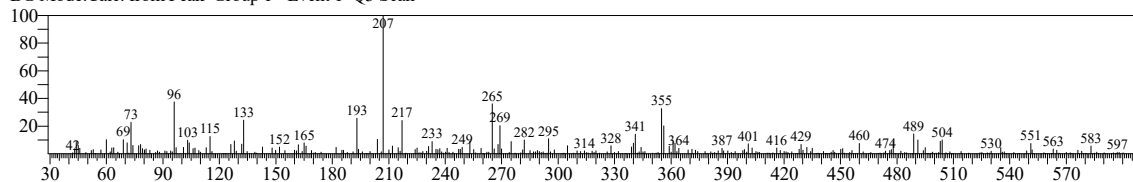

Hit#1 Entry:402 Library:OA\_TMS\_DB5\_67min\_V3.lib

SI:40 Formula:C20H42O4Si4 CAS:775-01-9 MolWeight:458 RetIndex:1942

CompName:3,4-Dihydroxymandelic acid-4TMS ; 2-(3,4-dihydroxyphenyl)-2-hydroxyacetic acid



Hit#2 Entry:343 Library:OA\_TMS\_DB5\_67min\_V3.lib

SI:40 Formula:C18H37NO3Si3 CAS:51-43-4 MolWeight:399 RetIndex:1868

CompName:Epinephrine-3TMS ; 4-[(1R)-1-hydroxy-2-(methylamino)ethyl]benzene-1,2-diol

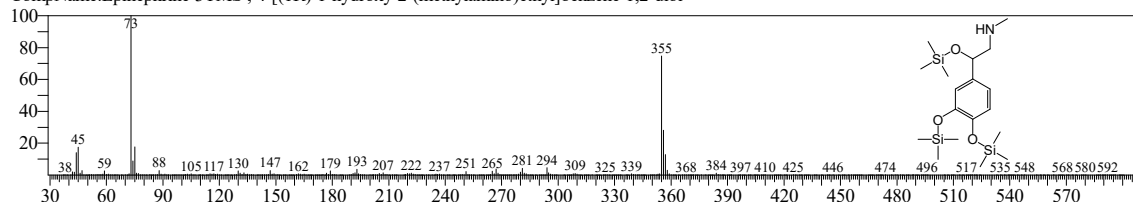

Hit#3 Entry:315 Library:OA\_TMS\_DB5\_67min\_V3.lib

SI:34 Formula:C16H30O4Si3 CAS:99-50-3 MolWeight:370 RetIndex:1833

CompName:Protocatechuic acid-3TMS ; 3,4-dihydroxybenzoic acid

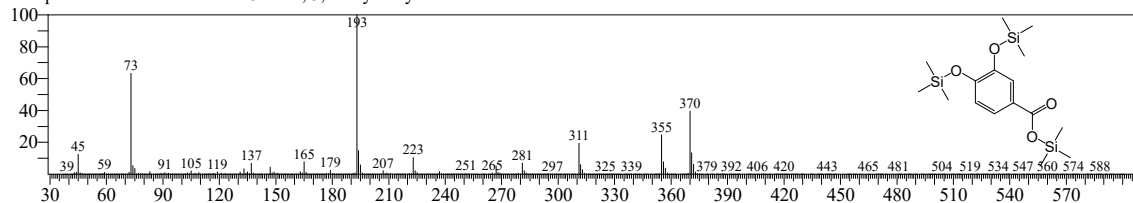

Hit#4 Entry:238 Library:OA\_TMS\_DB5\_67min\_V3.lib

SI:33 Formula:C17H42O5Si4 CAS:1114-34-7 MolWeight:438 RetIndex:1675

CompName:Lyxose-4TMS(2) ; (2S,3S,4R)-2,3,4,5-tetrahydroxypentanal

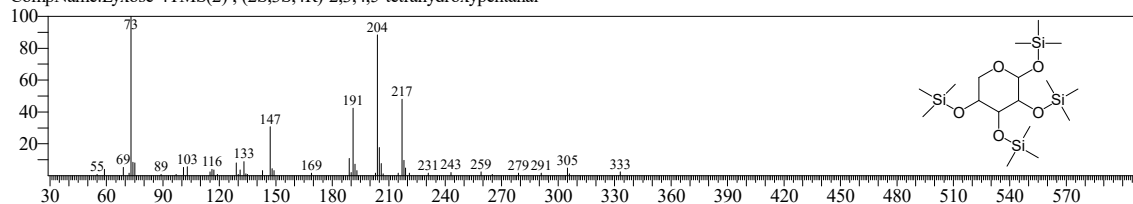

Hit#5 Entry:267 Library:OA\_TMS\_DB5\_67min\_V3.lib

SI:33 Formula:C17H42O5Si4 CAS:58-86-6 MolWeight:438 RetIndex:1732

CompName:Xylose-4TMS(1) ; (2R,3S,4R)-2,3,4,5-tetrahydroxypentanal

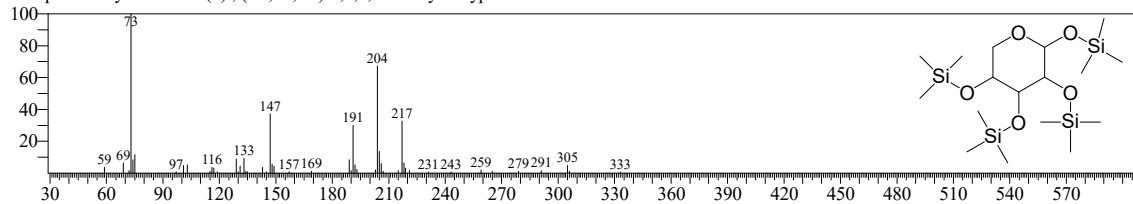

# TNAU

<< Target >>

Line#:10 R.Time:31.250(Scan#:5351) MassPeaks:283

RawMode:Averaged 31.245-31.255(5350-5352) BasePeak:207.05(1706)

BG Mode:Calc. from Peak Group 1 - Event 1 Q3 Scan

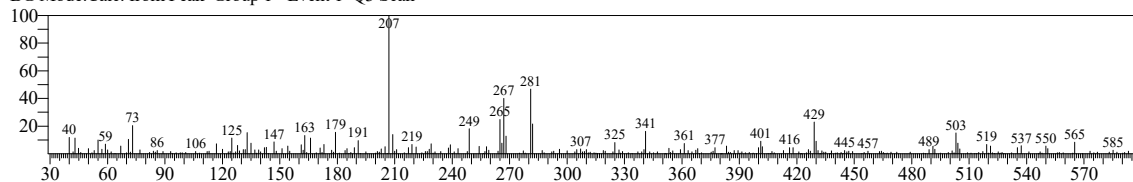

Hit#:1 Entry:310 Library:OA\_TMS\_DB5\_67min\_V3.lib

SI:40 Formula:C11H20N4OSi2 CAS:68-94-0 MolWeight:280 RetIndex:1822

CompName:Hypoxanthine-2TMS ; 3,7-dihydropurin-6-one

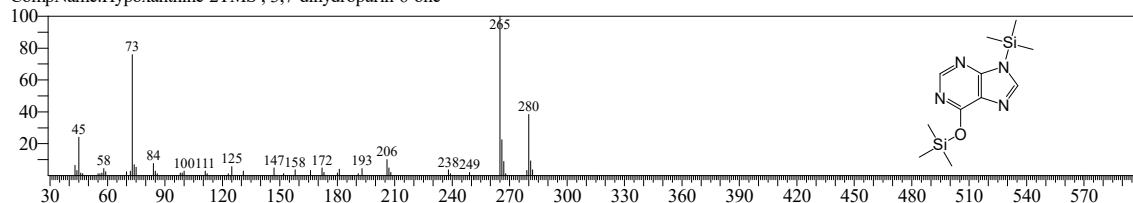

Hit#:2 Entry:341 Library:OA\_TMS\_DB5\_67min\_V3.lib

SI:39 Formula:C18H34O4Si3 CAS:3247-75-4 MolWeight:398 RetIndex:1864

CompName:3-(3-Hydroxyphenyl)-3-hydroxypropionic acid-3TMS ; 3-hydroxy-3-(3-hydroxyphenyl)propanoic acid

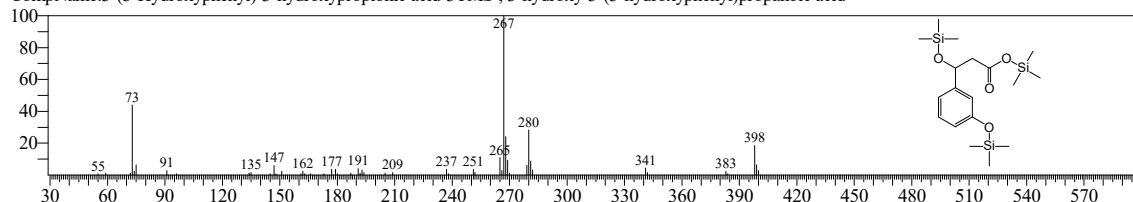

Hit#:3 Entry:382 Library:OA\_TMS\_DB5\_67min\_V3.lib

SI:36 Formula:C18H34O4Si3 CAS:6482-98-0 MolWeight:398 RetIndex:1918

CompName:4-Hydroxyphenyllactic acid-3TMS ; 2-hydroxy-3-(4-hydroxyphenyl)propanoate

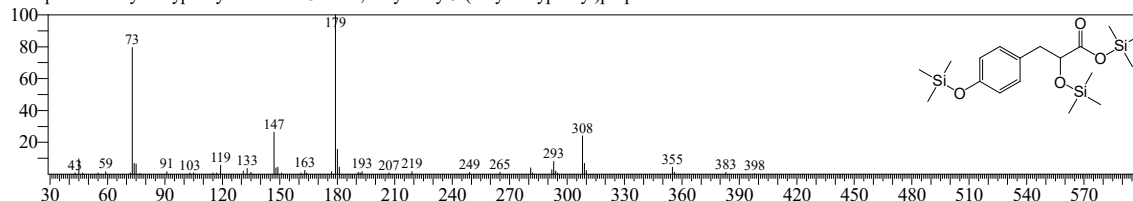

Hit#:4 Entry:211 Library:OA\_TMS\_DB5\_67min\_V3.lib

SI:34 Formula:C13H22O3Si2 CAS:99-96-7 MolWeight:282 RetIndex:1636

CompName:4-Hydroxybenzoic acid-2TMS ; 4-hydroxybenzoic acid

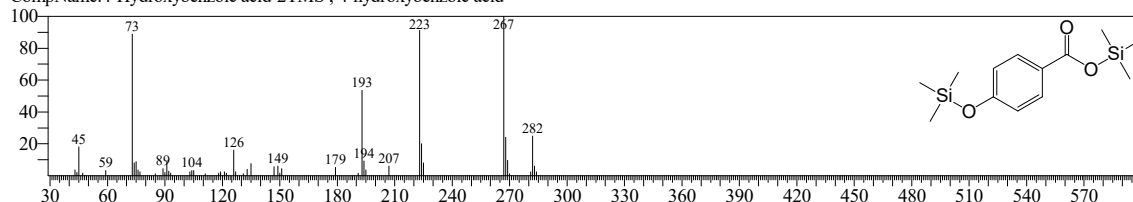

Hit#:5 Entry:179 Library:OA\_TMS\_DB5\_67min\_V3.lib

SI:34 Formula:C13H22O3Si2 CAS:99-06-9 MolWeight:282 RetIndex:1572

CompName:3-Hydroxybenzoic acid-2TMS ; 3-hydroxybenzoic acid

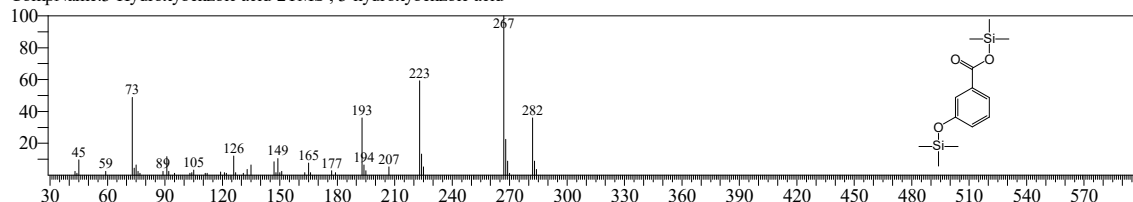

# TNAU

<< Target >>

Line#:11 R.Time:31.390(Scan#:5379) MassPeaks:313

RawMode:Averaged 31.385-31.395(5378-5380) BasePeak:96.05(1039)

BG Mode:Calc. from Peak Group 1 - Event 1 Q3 Scan

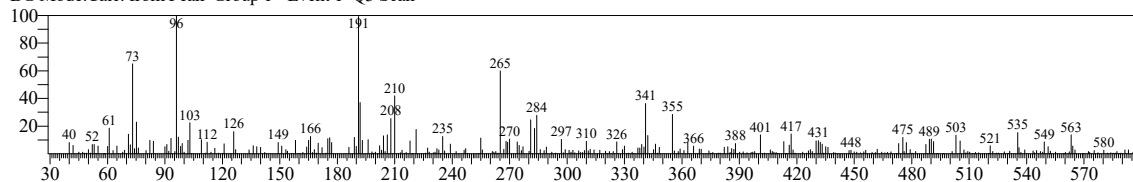

Hit#:1 Entry:345 Library:OA\_TMS\_DB5\_67min\_V3.lib

SI:36 Formula:C<sub>21</sub>H<sub>52</sub>O<sub>6</sub>Si<sub>5</sub> CAS:59-23-4 MolWeight:540 RetIndex:1868

CompName:Galactose-5TMS(2) ; (3R,4S,5R,6R)-6-(hydroxymethyl)oxane-2,3,4,5-tetrol

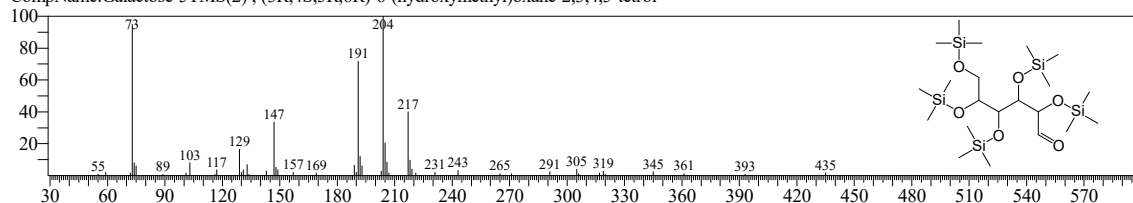

Hit#:2 Entry:210 Library:OA\_TMS\_DB5\_67min\_V3.lib

SI:35 Formula:C<sub>17</sub>H<sub>42</sub>O<sub>5</sub>Si<sub>4</sub> CAS:10323-20-3 MolWeight:438 RetIndex:1634

CompName:Arabinose-4TMS(1) ; (2S,3R,4R)-2,3,4,5-tetrahydroxypentanal

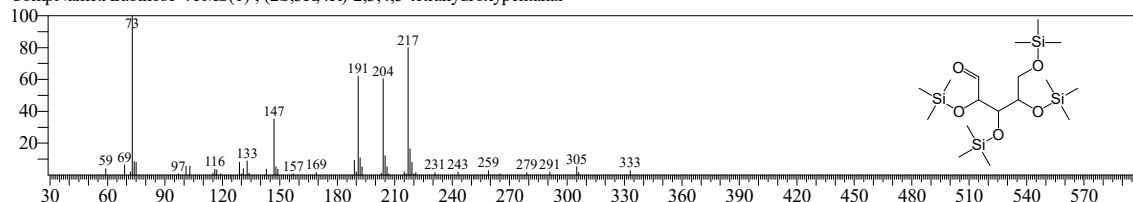

Hit#:3 Entry:386 Library:OA\_TMS\_DB5\_67min\_V3.lib

SI:34 Formula:C<sub>21</sub>H<sub>52</sub>O<sub>6</sub>Si<sub>5</sub> CAS:50-99-7 MolWeight:540 RetIndex:1922

CompName:Glucose-5TMS(1) ; (3R,4S,5S,6R)-6-(hydroxymethyl)oxane-2,3,4,5-tetrol

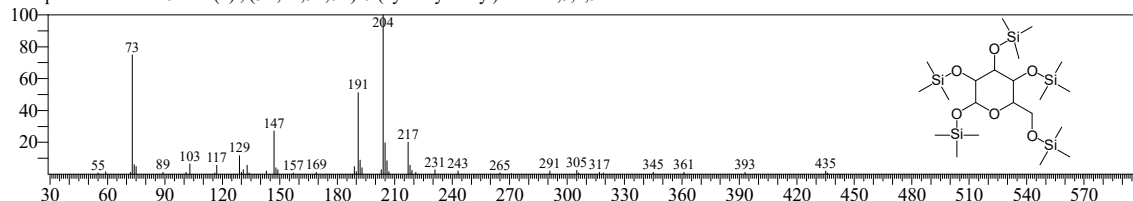

Hit#:4 Entry:290 Library:OA\_TMS\_DB5\_67min\_V3.lib

SI:34 Formula:C<sub>13</sub>H<sub>23</sub>NO<sub>3</sub>Si<sub>2</sub> CAS:548-93-6 MolWeight:297 RetIndex:1773

CompName:3-Hydroxyanthranilic acid-2TMS ; 2-amino-3-hydroxybenzoic acid

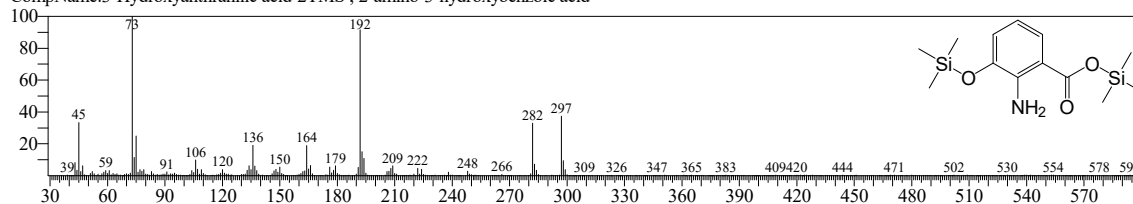

Hit#:5 Entry:349 Library:OA\_TMS\_DB5\_67min\_V3.lib

SI:34 Formula:C<sub>21</sub>H<sub>52</sub>O<sub>6</sub>Si<sub>5</sub> CAS:2595-97-3 MolWeight:540 RetIndex:1874

CompName:Allose-5TMS ; (2R,3R,4R,5R)-2,3,4,5,6-pentahydroxyhexanal

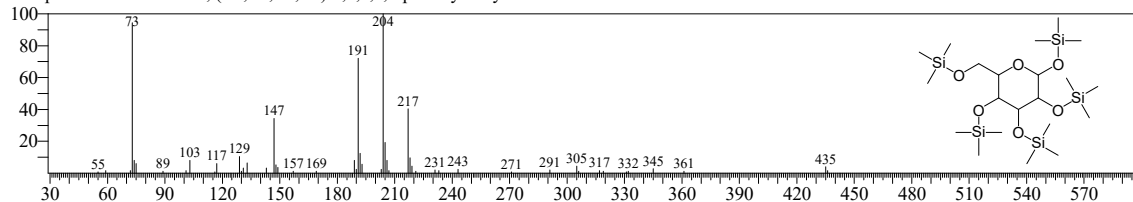

# TNAU

<< Target >>

Line#:12 R.Time:31.770(Scan#:5455) MassPeaks:320

RawMode:Averaged 31.765-31.775(5454-5456) BasePeak:207.05(1968)

BG Mode:Calc. from Peak Group 1 - Event 1 Q3 Scan

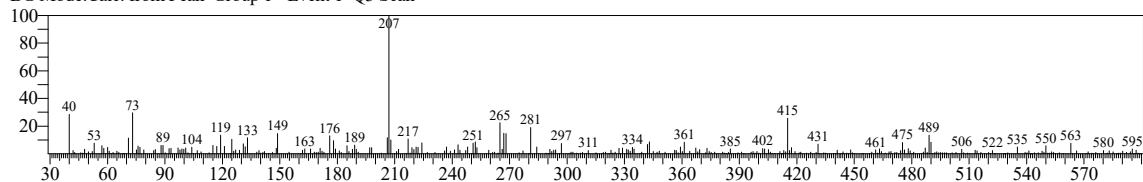

Hit#:1 Entry:332 Library:OA\_TMS\_DB5\_67min\_V3.lib

SI:34 Formula:C17H32O4Si3 CAS:451-13-8 MolWeight:384 RetIndex:1850

CompName:Homogentisic acid-3TMS ; 2-(2,5-dihydroxyphenyl)acetic acid

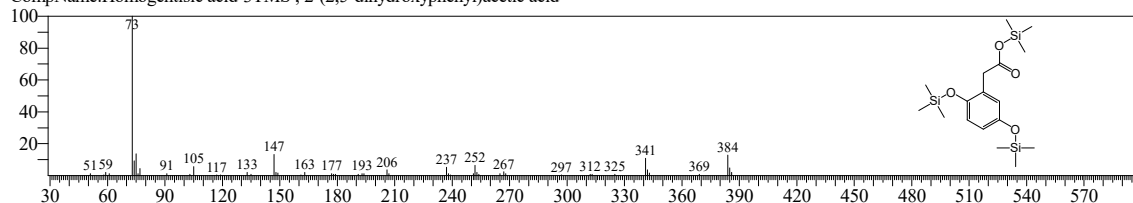

Hit#:2 Entry:328 Library:OA\_TMS\_DB5\_67min\_V3.lib

SI:34 Formula:C13H23NO2Si2 CAS:150-13-0 MolWeight:281 RetIndex:1845

CompName:4-Aminobenzoic acid-2TMS ; 4-aminobenzoic acid

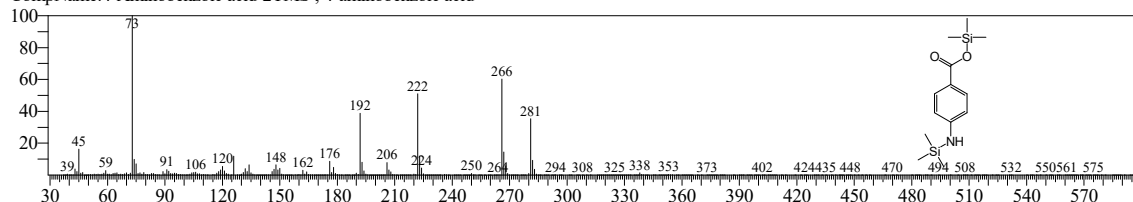

Hit#:3 Entry:359 Library:OA\_TMS\_DB5\_67min\_V3.lib

SI:33 Formula:C18H34O5Si3 CAS:55-10-7 MolWeight:414 RetIndex:1894

CompName:Vanilmandelic acid-3TMS ; 2-hydroxy-2-(4-hydroxy-3-methoxyphenyl)acetic acid

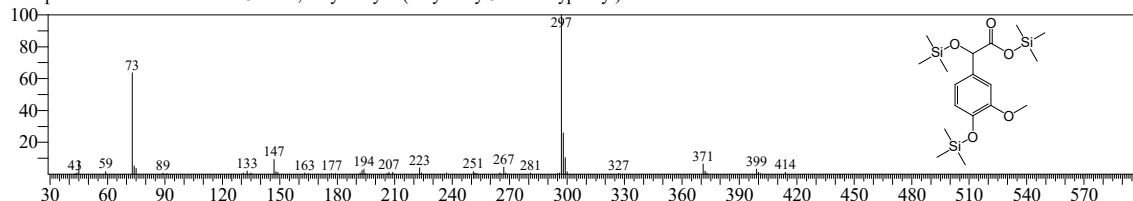

Hit#:4 Entry:310 Library:OA\_TMS\_DB5\_67min\_V3.lib

SI:33 Formula:C11H20N4OSi2 CAS:68-94-0 MolWeight:280 RetIndex:1822

CompName:Hypoxanthine-2TMS ; 3,7-dihydropurin-6-one

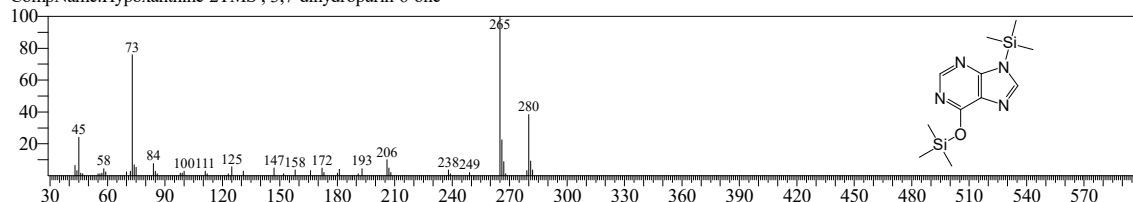

Hit#:5 Entry:211 Library:OA\_TMS\_DB5\_67min\_V3.lib

SI:31 Formula:C13H22O3Si2 CAS:99-96-7 MolWeight:282 RetIndex:1636

CompName:4-Hydroxybenzoic acid-2TMS ; 4-hydroxybenzoic acid

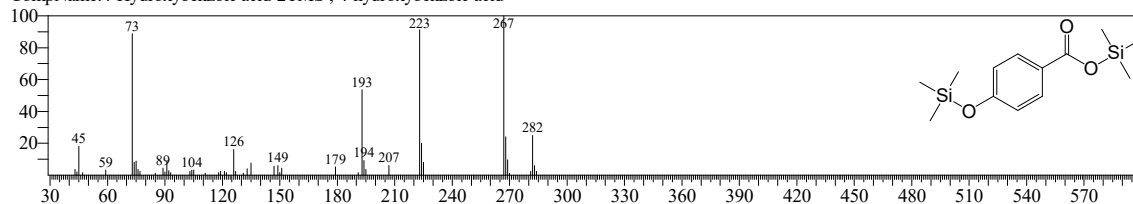

# TNAU

<< Target >>

Line#:13 R.Time:31.900(Scan#:5481) MassPeaks:316

RawMode:Averaged 31.895-31.905(5480-5482) BasePeak:139.15(1561)

BG Mode:Calc. from Peak Group 1 - Event 1 Q3 Scan

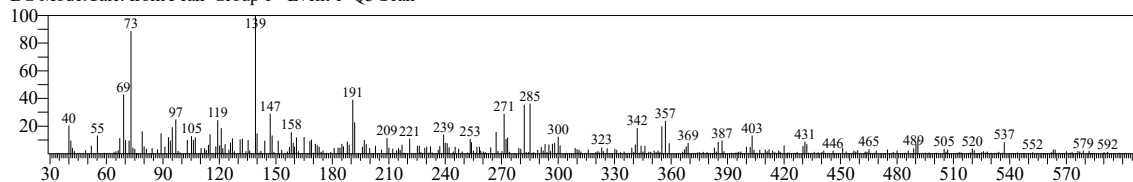

Hit#:1 Entry:438 Library:OA\_TMS\_DB5\_67min\_V3.lib

SI:37 Formula:C<sub>12</sub>H<sub>22</sub>N<sub>2</sub>O<sub>2</sub>Si<sub>2</sub> CAS:104-98-3 MolWeight:282 RetIndex:2014

CompName:Urocanic acid-2TMS ; (E)-3-(1H-imidazol-5-yl)prop-2-enoic acid

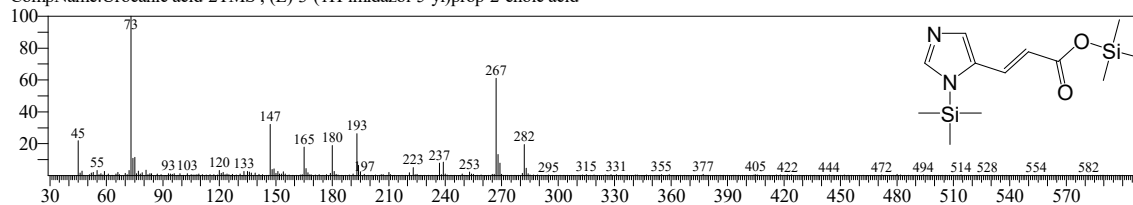

Hit#:2 Entry:534 Library:OA\_TMS\_DB5\_67min\_V3.lib

SI:36 Formula:C<sub>25</sub>H<sub>42</sub>O<sub>2</sub>Si CAS:24880-45-3 MolWeight:402 RetIndex:2591

CompName:Docosapentaenoic acid-TMS ; (7Z,10Z,13Z,16Z,19Z)-docosa-7,10,13,16,19-pentaenoic acid

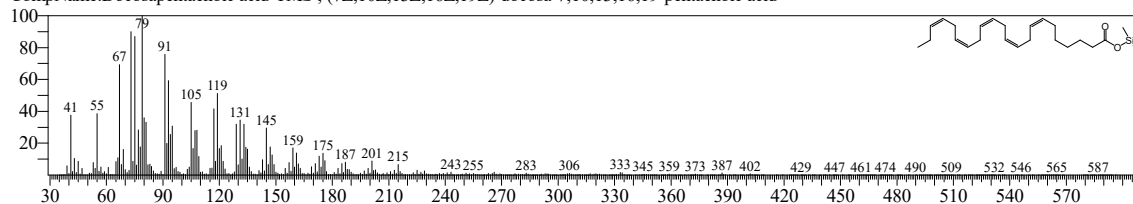

Hit#:3 Entry:23 Library:OA\_TMS\_DB5\_67min\_V3.lib

SI:35 Formula:C<sub>10</sub>H<sub>24</sub>O<sub>3</sub>Si<sub>2</sub> CAS:600-15-7 MolWeight:248 RetIndex:1129

CompName:2-Hydroxybutyric acid-2TMS ; 2-hydroxybutanoic acid

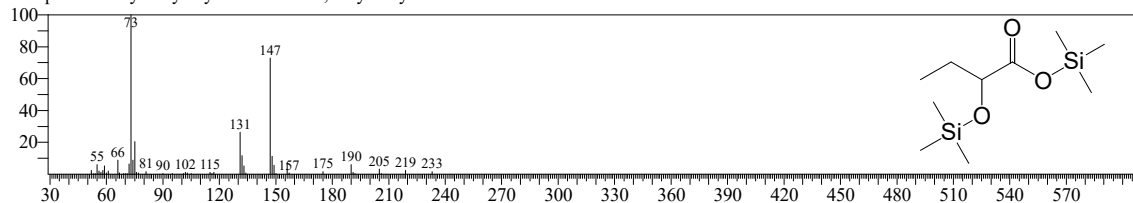

Hit#:4 Entry:9 Library:OA\_TMS\_DB5\_67min\_V3.lib

SI:35 Formula: CAS:0-00-0 MolWeight:237 RetIndex:1062

CompName:Lactic acid-13C3-2TMS ;

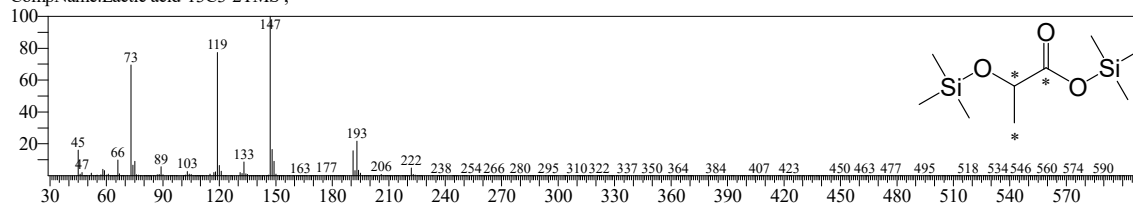

Hit#:5 Entry:258 Library:OA\_TMS\_DB5\_67min\_V3.lib

SI:35 Formula:C<sub>14</sub>H<sub>30</sub>O<sub>4</sub>Si<sub>2</sub> CAS:505-48-6 MolWeight:318 RetIndex:1700

CompName:Suberic acid-2TMS ; octanedioic acid

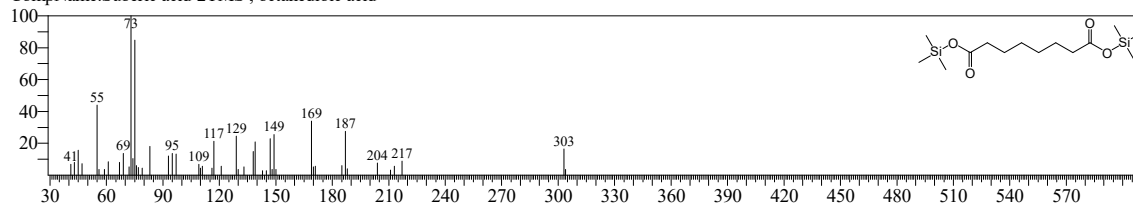

# TNAU

<< Target >>

Line#:14 R.Time:32.460(Scan#:5593) MassPeaks:312

RawMode:Averaged 32.455-32.465(5592-5594) BasePeak:208.00(679)

BG Mode:Calc. from Peak Group 1 - Event 1 Q3 Scan

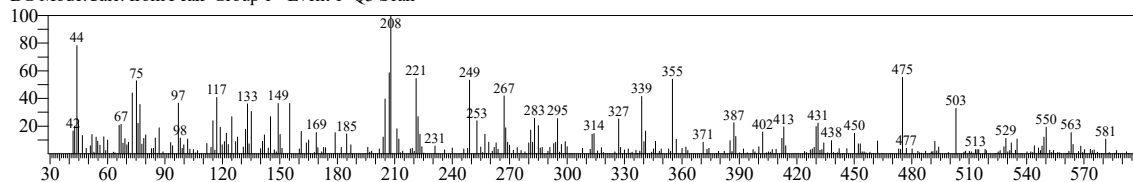

Hit#:1 Entry:343 Library:OA\_TMS\_DB5\_67min\_V3.lib

SI:35 Formula:C18H37NO3Si3 CAS:51-43-4 MolWeight:399 RetIndex:1868

CompName:Epinephrine-3-TMS ; 4-[(1R)-1-hydroxy-2-(methylamino)ethyl]benzene-1,2-diol

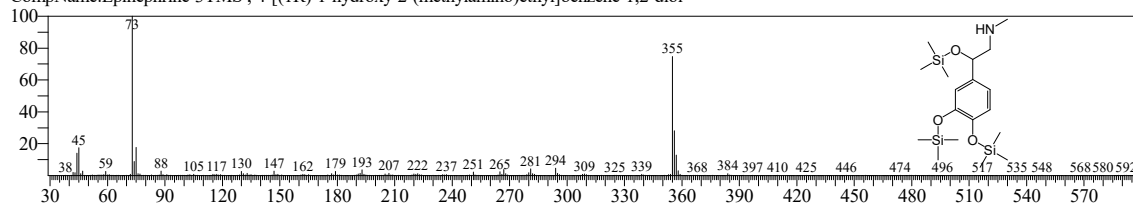

Hit#:2 Entry:171 Library:OA\_TMS\_DB5\_67min\_V3.lib

SI:33 Formula:C12H16O2Si CAS:140-10-3 MolWeight:220 RetIndex:1552

CompName:Cinnamic acid-TMS ; (E)-3-phenylprop-2-enoic acid

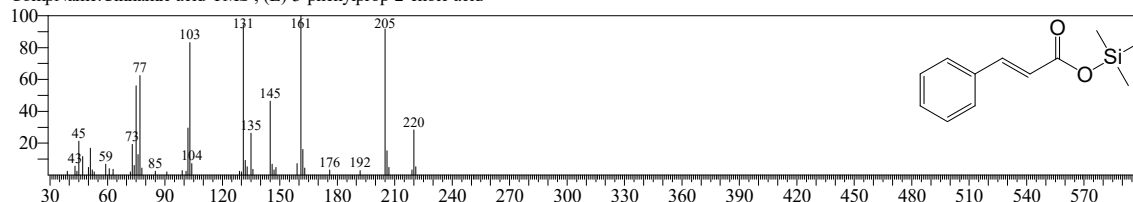

Hit#:3 Entry:491 Library:OA\_TMS\_DB5\_67min\_V3.lib

SI:31 Formula:C21H44O2Si CAS:57-11-4 MolWeight:356 RetIndex:2244

CompName:Stearic acid-TMS ; octadecanoic acid

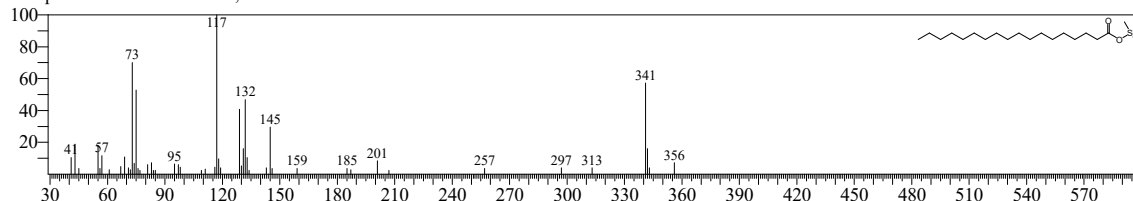

Hit#:4 Entry:331 Library:OA\_TMS\_DB5\_67min\_V3.lib

SI:31 Formula:C17H36O2Si CAS:544-63-8 MolWeight:300 RetIndex:1850

CompName:Myristic acid-TMS ; tetradecanoic acid

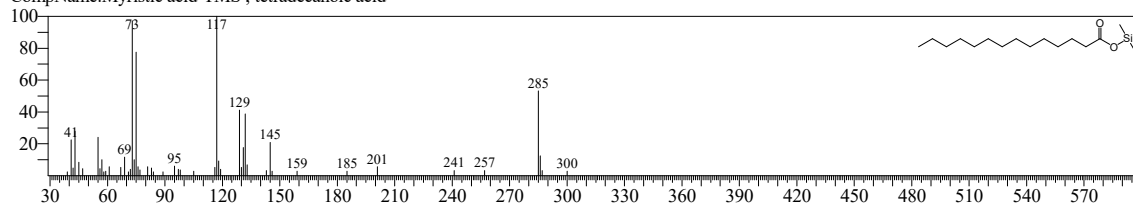

Hit#:5 Entry:402 Library:OA\_TMS\_DB5\_67min\_V3.lib

SI:31 Formula:C20H42O4Si4 CAS:775-01-9 MolWeight:458 RetIndex:1942

CompName:3,4-Dihydroxymandelic acid-4TMS ; 2-(3,4-dihydroxyphenyl)-2-hydroxyacetic acid

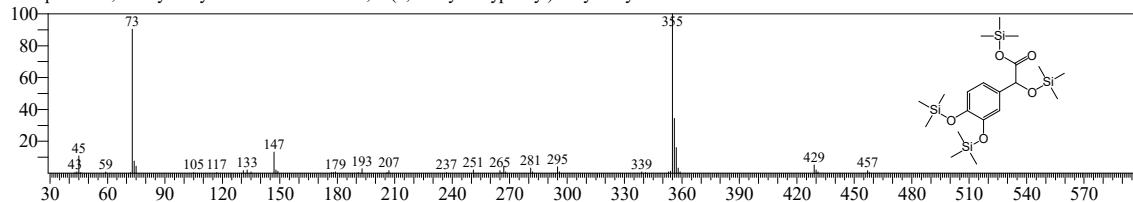

# TNAU

<< Target >>

Line#:15 R.Time:32.720(Scan#:5645) MassPeaks:307

RawMode:Averaged 32.715-32.725(5644-5646) BasePeak:207.05(1732)

BG Mode:Calc. from Peak Group 1 - Event 1 Q3 Scan

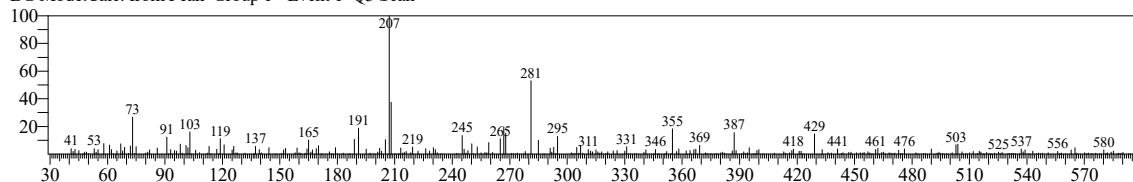

Hit#:1 Entry:402 Library:OA TMS DB5 67min V3.lib

SI:36 Formula:C20H42O4Si4 CAS:775-01-9 MolWeight:458 RetIndex:1942

CompName:3,4-Dihydroxymandelic acid-4TMS ; 2-(3,4-dihydroxyphenyl)-2-hydroxyacetic acid

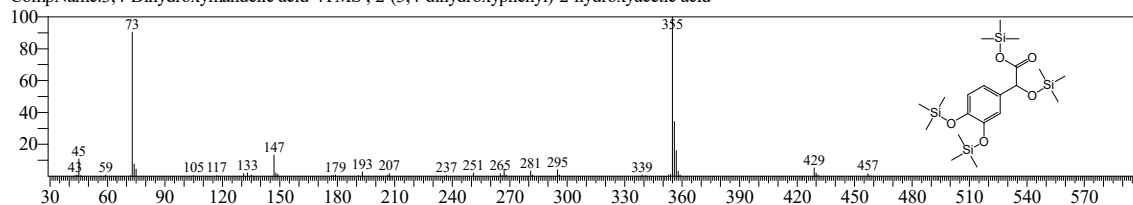

Hit#:2 Entry:343 Library:OA TMS DB5 67min V3.lib

SI:36 Formula:C18H37NO3Si3 CAS:51-43-4 MolWeight:399 RetIndex:1868

CompName:Epinephrine-3TMS ; 4-[(1R)-1-hydroxy-2-(methylamino)ethyl]benzene-1,2-diol

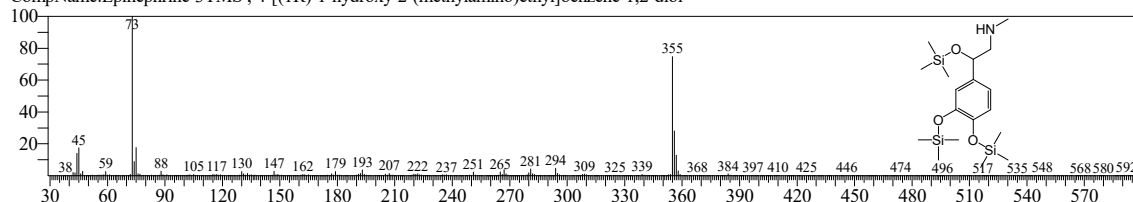

Hit#:3 Entry:310 Library:OA TMS DB5 67min V3.lib

SI:35 Formula:C11H20N4OSi2 CAS:68-94-0 MolWeight:280 RetIndex:1822

CompName:Hypoxanthine-2TMS ; 3,7-dihydropurin-6-one

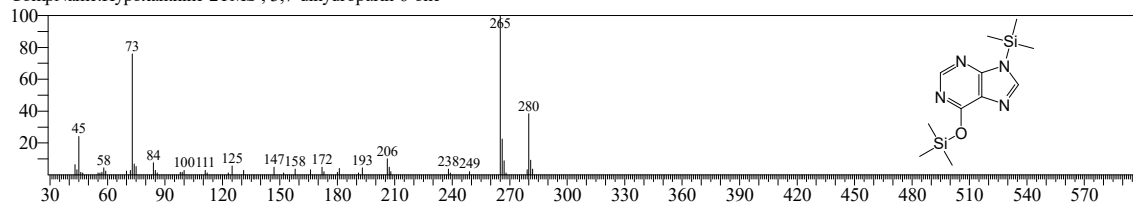

Hit#:4 Entry:535 Library:OA TMS DB5 67min V3.lib

SI:35 Formula:C22H44N4O5Si4 CAS:58-63-9 MolWeight:556 RetIndex:2605

CompName:Inosine-4TMS ; 9-[(2R,3R,4S,5R)-3,4-dihydroxy-5-(hydroxymethyl)oxolan-2-yl]-3H-purin-6-one

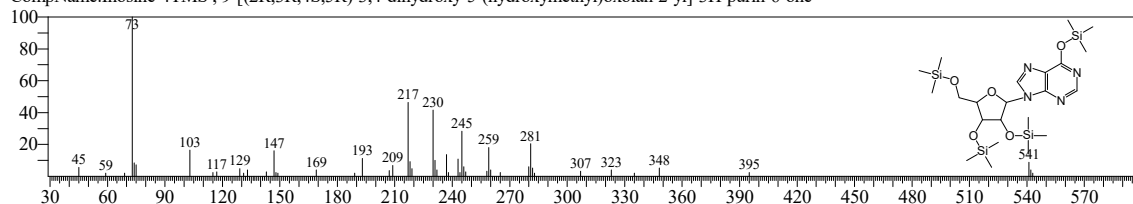

Hit#:5 Entry:382 Library:OA TMS DB5 67min V3.lib

SI:34 Formula:C18H34O4Si3 CAS:6482-98-0 MolWeight:398 RetIndex:1918

CompName:4-Hydroxyphenyllactic acid-3TMS ; 2-hydroxy-3-(4-hydroxyphenyl)propanoate

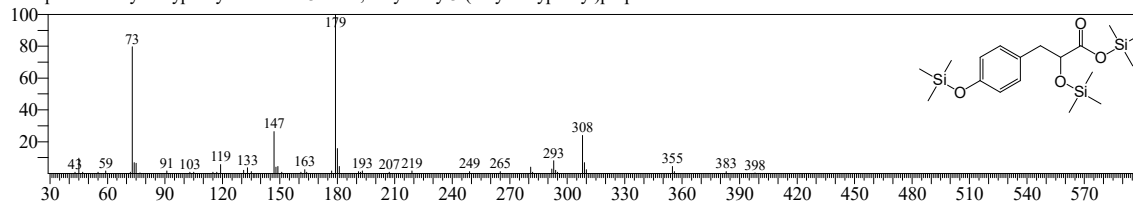

Supplement: Supplementary file 45 [file supplementary]
