# Supplementary material for: Comparative Metabolomics Profiling Reveals Key Metabolites and Associated Pathways Regulating Tuber Dormancy in White Yam (<em>Dioscorea rotundata</em>)
Source: Preprints.org preprint supplement (doi:10.20944/preprints202303.0378.v1), 2023-03-21

# TNAU

## Sample Information

Analyzed by : Admin  
 Analyzed : 01-Sep-22 8:12:49 PM  
 Sample Type : Unknown  
 Level # : 1  
 Sample Name : Sample  
 Sample ID : 1-3  
 IS Amount : [1]=1  
 Sample Amount : 1  
 Dilution Factor : 1  
 Vial # : 2  
 Injection Volume : 2.00  
 Data File : D:\GCMS-8040NX\Sep 2022\Users\01.09.2022\01092022004.qgd  
 Org Data File : D:\GCMS-8040NX\Sep 2022\Users\01.09.2022\01092022004.qgd  
 Method File : D:\GCMS-8040NX\Sep 2022\Method\Scan\_methodfile.qgm  
 Org Method File : D:\GCMS-8040NX\Sep 2022\Method\Scan\_methodfile.qgm  
 Report File :  
 Tuning File : D:\GCMS-8040NX\Aug 2022\Tuning Data\TUNING 25082022.qgt  
 Modified by : Admin  
 Modified : 05-Sep-22 10:55:36 AM

Chromatogram Sample D:\GCMS-8040NX\Sep 2022\Users\01.09.2022\01092022004.qgd

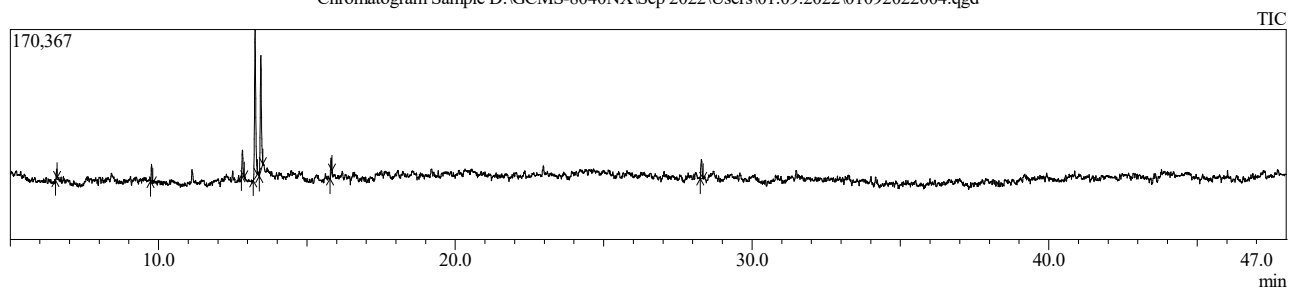

## Peak Report TIC

| Peak# | R.Time | Area   | Area%  | Height | Height% | A/H  | Similarity | Name                           |
|-------|--------|--------|--------|--------|---------|------|------------|--------------------------------|
| 1     | 6.568  | 12855  | 1.66   | 7766   | 2.72    | 1.66 | 37         | Vanillylamine-3TMS             |
| 2     | 9.764  | 27424  | 3.53   | 14387  | 5.04    | 1.91 | 93         | Pentasiloxane, dodecamethyl-   |
| 3     | 12.824 | 50723  | 6.53   | 21179  | 7.43    | 2.39 | 72         | 1,3-Benzodioxol-5-ol           |
| 4     | 13.253 | 350172 | 45.09  | 120360 | 42.20   | 2.91 | 54         | Methyl cis-13,16-Docosadienate |
| 5     | 13.445 | 264201 | 34.02  | 93642  | 32.83   | 2.82 | 54         | Methyl cis-13,16-Docosadienate |
| 6     | 15.818 | 26638  | 3.43   | 12210  | 4.28    | 2.18 | 74         | Malic acid 1-ethyl ester, 2TMS |
| 7     | 28.294 | 44545  | 5.74   | 15679  | 5.50    | 2.84 | 89         | n-Hexadecanoic acid            |
|       |        | 776558 | 100.00 | 285223 | 100.00  |      |            |                                |

Library

# TNAU

<< Target >>

Line#:1 R.Time:6.570(Scan#:315) MassPeaks:359

RawMode:Averaged 6.565-6.575(314-316) BasePeak:253.10(1080)

BG Mode:Calc. from Peak Group 1 - Event 1 Q3 Scan

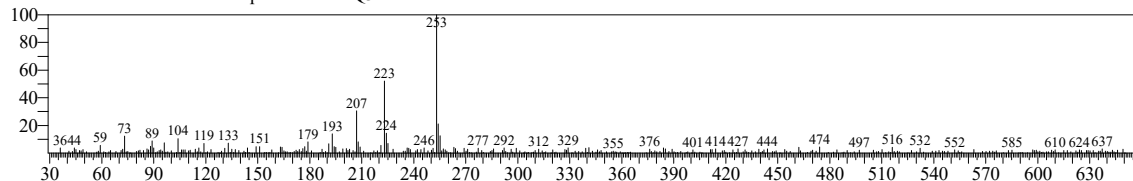

Hit#:1 Entry:368 Library:OA\_TMS\_DB5\_67min\_V3.lib

SI:37 Formula:C<sub>17</sub>H<sub>35</sub>NO<sub>2</sub>Si<sub>3</sub> CAS:1196-92-5 MolWeight:369 RetIndex:1899

CompName:Vanillylamine-3TMS ; 4-(aminomethyl)-2-methoxyphenol

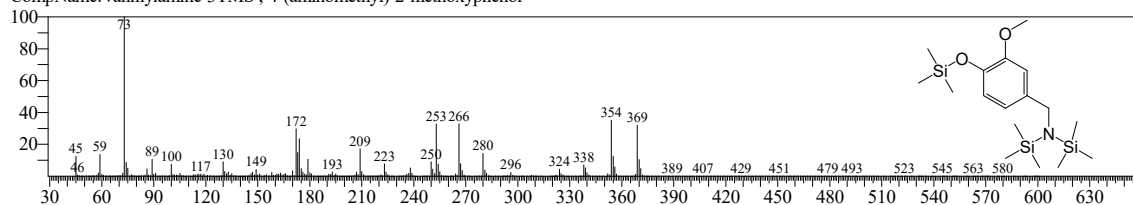

Hit#:2 Entry:184 Library:OA\_TMS\_DB5\_67min\_V3.lib

SI:36 Formula:C<sub>14</sub>H<sub>24</sub>O<sub>3</sub>Si<sub>2</sub> CAS:614-75-5 MolWeight:296 RetIndex:1579

CompName:2-Hydroxyphenylacetic acid-2TMS ; 2-(2-hydroxyphenyl)acetic acid

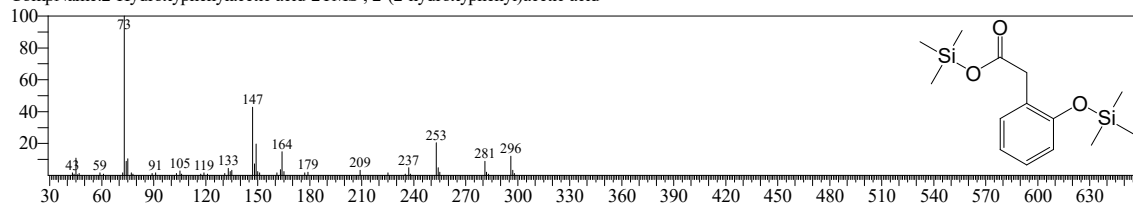

Hit#:3 Entry:138 Library:OA\_TMS\_DB5\_67min\_V3.lib

SI:36 Formula:C<sub>14</sub>H<sub>24</sub>O<sub>3</sub>Si<sub>2</sub> CAS:90-64-2 MolWeight:296 RetIndex:1486

CompName:Mandelic acid-2TMS ; 2-hydroxy-2-phenylacetic acid

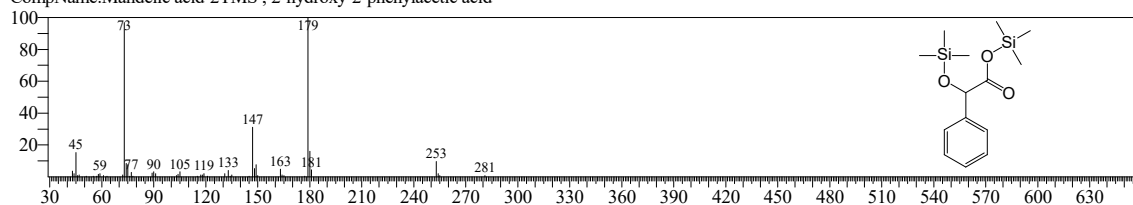

Hit#:4 Entry:332 Library:OA\_TMS\_DB5\_67min\_V3.lib

SI:34 Formula:C<sub>17</sub>H<sub>32</sub>O<sub>4</sub>Si<sub>3</sub> CAS:451-13-8 MolWeight:384 RetIndex:1850

CompName:Homogentisic acid-3TMS ; 2-(2,5-dihydroxyphenyl)acetic acid

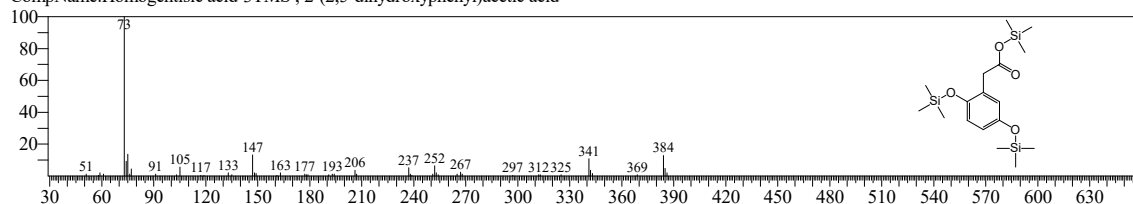

Hit#:5 Entry:220 Library:OA\_TMS\_DB5\_67min\_V3.lib

SI:34 Formula:C<sub>14</sub>H<sub>24</sub>O<sub>3</sub>Si<sub>2</sub> CAS:156-38-7 MolWeight:296 RetIndex:1647

CompName:4-Hydroxyphenylacetic acid-2TMS ; 2-(4-hydroxyphenyl)acetic acid

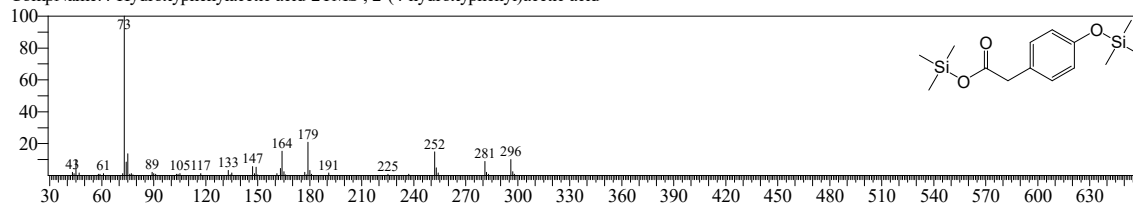

# TNAU

<< Target >>

Line#:2 R.Time:9.765(Scan#:954) MassPeaks:311

RawMode:Averaged 9.760-9.770(953-955) BasePeak:281.05(3530)

BG Mode:Calc. from Peak Group 1 - Event 1 Q3 Scan

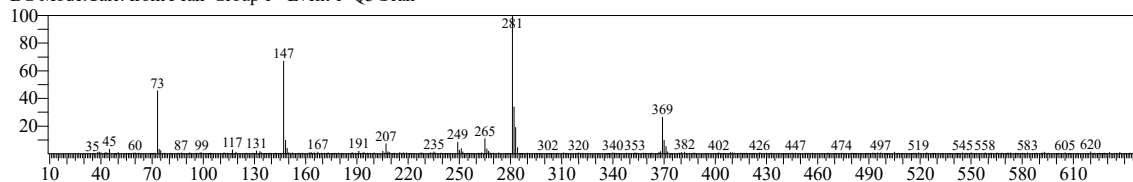

Hit#:1 Entry:40975 Library:NIST20R.lib

SI:93 Formula:C<sub>12</sub>H<sub>36</sub>O<sub>4</sub>Si<sub>5</sub> CAS:141-63-9 MolWeight:384 RetIndex:1068

CompName:Pentasiloxane, dodecamethyl- \$\$ Dodecamethylpentasiloxane \$\$ 1,1,1,3,3,5,5,7,7,9,9-Dodecamethylpentasiloxane #

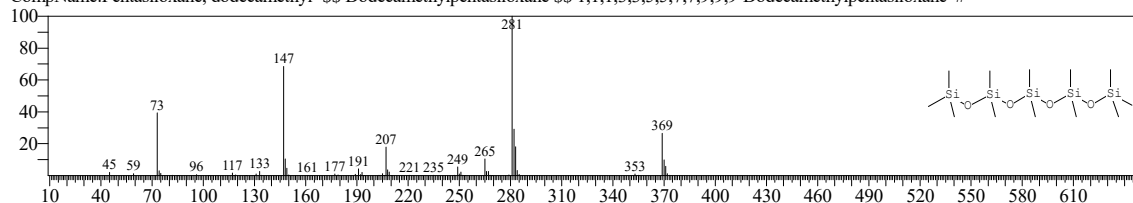

Hit#:2 Entry:249272 Library:NIST20M1.lib

SI:82 Formula:C<sub>12</sub>H<sub>36</sub>O<sub>4</sub>Si<sub>5</sub> CAS:3555-47-3 MolWeight:384 RetIndex:1068

CompName:Trisiloxane, 1,1,1,5,5,5-hexamethyl-3,3-bis[(trimethylsilyl)oxy]- \$\$ Tetrakis(trimethylsiloxy)silane \$\$ Trisiloxane, 1,1,1,5,5,5-hexamethyl-3,3-b

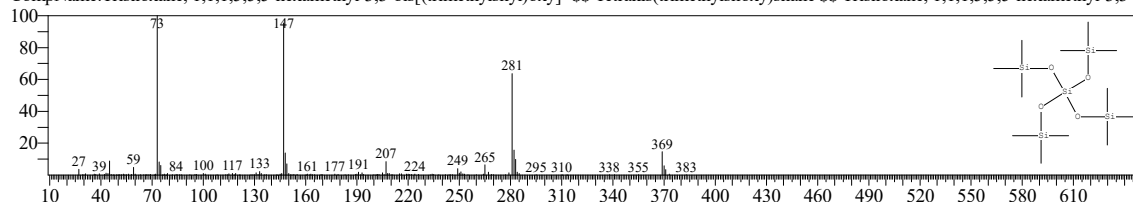

Hit#:3 Entry:27848 Library:NIST20M2.lib

SI:79 Formula:C<sub>18</sub>H<sub>48</sub>O<sub>4</sub>Si<sub>5</sub> CAS:0-00-0 MolWeight:468 RetIndex:1495

CompName:1,3,5,7,9-Pentasiloxane, 1,1,3,3,5,5,7,7,9,9-decamethyl-1,9-di(tert.butyl)-

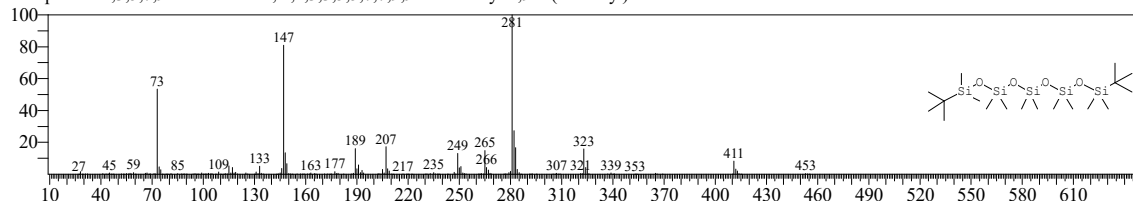

Hit#:4 Entry:249271 Library:NIST20M1.lib

SI:78 Formula:C<sub>12</sub>H<sub>36</sub>O<sub>4</sub>Si<sub>5</sub> CAS:38146-99-5 MolWeight:384 RetIndex:1068

CompName:1,1,1,3,5,5,7,7-Nonamethyl-3-(trimethylsiloxy)tetrasiloxane \$\$ 1,1,1,3,3,5,5,7,7-Nonamethyl-5-[(trimethylsilyl)oxy]tetrasiloxane #

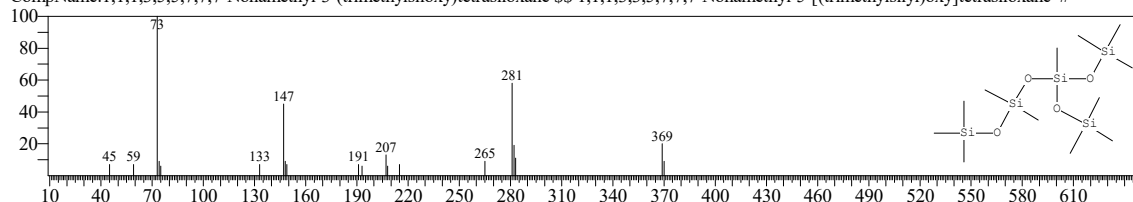

Hit#:5 Entry:158097 Library:NIST20M1.lib

SI:76 Formula:C<sub>14</sub>H<sub>24</sub>O<sub>3</sub>Si<sub>2</sub> CAS:0-00-0 MolWeight:296 RetIndex:1625

CompName:2,6-Dihydroxyacetophenone, 2TMS derivative \$\$ 2',6'-Dihydroxyacetophenone, bis(trimethylsilyl) ether

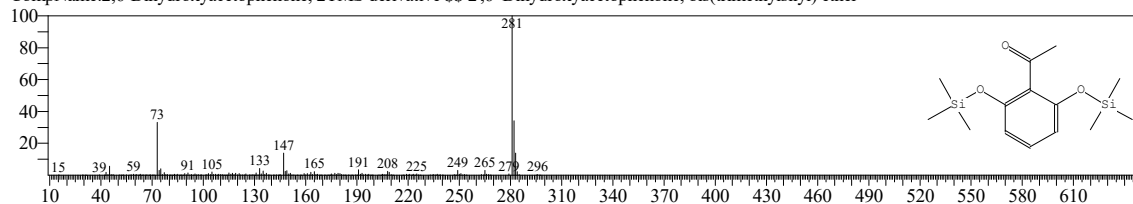

# TNAU

<< Target >>

Line#3 R.Time:12.825(Scan#:1566) MassPeaks:368

RawMode:Averaged 12.820-12.830(1565-1567) BasePeak:138.10(6273)

BG Mode:Calc. from Peak Group 1 - Event 1 Q3 Scan

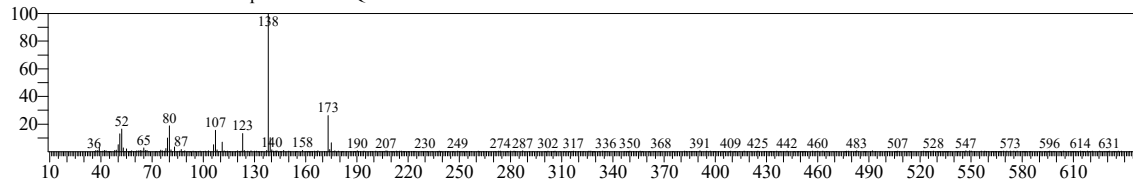

Hit#1 Entry:11187 Library:NIST20M1.lib

SI:72 Formula:C7H6O3 CAS:533-31-3 MolWeight:138 RetIndex:1245

CompName:1,3-Benzodioxol-5-ol \$ Phenol, 3,4-(methylenedioxy)- \$ Sesamol \$ 3,4-(Methylenedioxy)phenol \$ 5-Hydroxy-1,3-benzodioxole \$ Methy

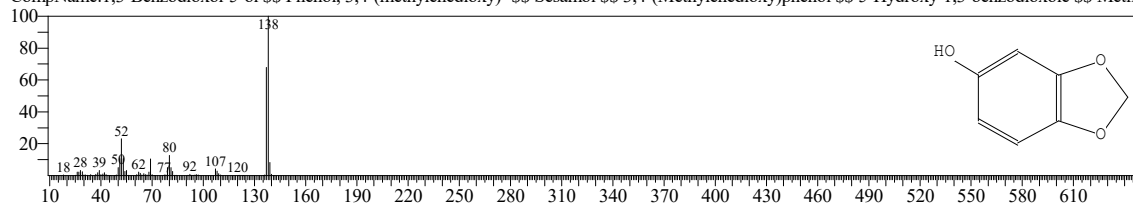

Hit#2 Entry:8360 Library:NIST20R.lib

SI:71 Formula:C6H6N2O2 CAS:105-11-3 MolWeight:138 RetIndex:1349

CompName:2,5-Cyclohexadiene-1,4-dione, dioxime \$ p-Benzoquinone, dioxime \$ p-Quinone dioxime \$ p-Quinone oxime \$ Benzoquinone dioxime \$

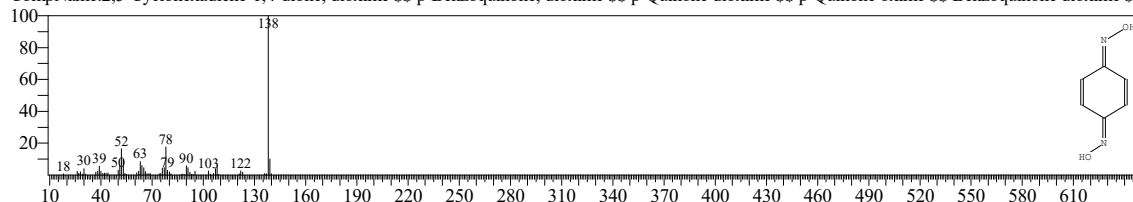

Hit#3 Entry:11188 Library:NIST20M1.lib

SI:71 Formula:C7H6O3 CAS:69393-72-2 MolWeight:138 RetIndex:1245

CompName:2,3-Methylenedioxyphenol \$ 1,3-Benzodioxol-4-ol #

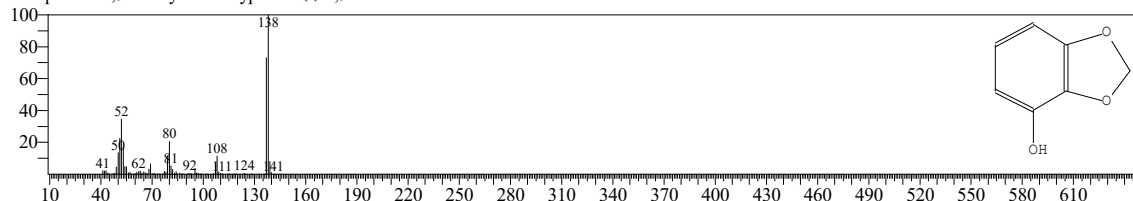

Hit#4 Entry:137 Library:OA\_TMS\_DB5\_67min\_V3.lib

SI:33 Formula:C9H14N2OSi CAS:98-92-0 MolWeight:194 RetIndex:1486

CompName:Niacinamide-TMS ; pyridine-3-carboxamide

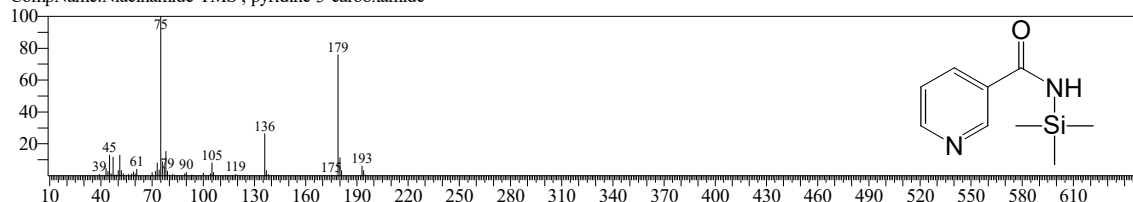

Hit#5 Entry:34 Library:FA\_ME\_SP2560\_EI\_V3.lib

SI:30 Formula:C23H42O2 CAS:7370-49-2 MolWeight:350 RetIndex:3169

CompName:Methyl cis-13,16-Docosadienate ; (13Z,16E)-docosa-13,16-dienoic acid

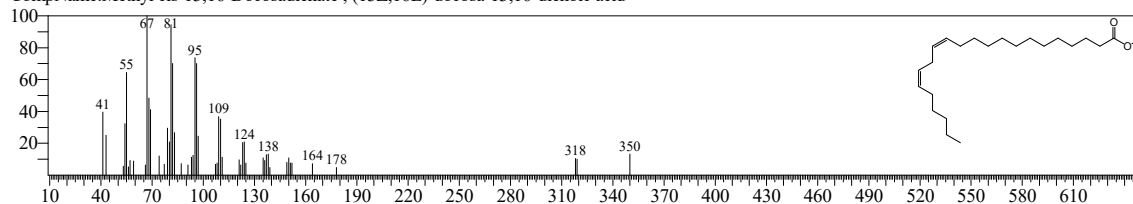

# TNAU

<< Target >>

Line#:4 R.Time:13.255(Scan#:1652) MassPeaks:339

RawMode:Averaged 13.250-13.260(1651-1653) BasePeak:155.05(18939)

BG Mode:Calc. from Peak Group 1 - Event 1 Q3 Scan

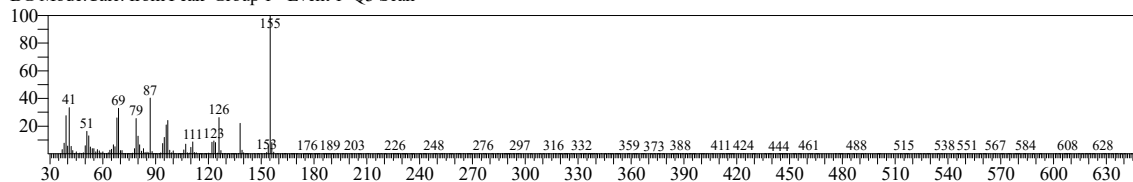

Hit#:1 Entry:34 Library:FA\_ME\_SP2560\_EI\_V3.lib

SI:54 Formula:C23H42O2 CAS:7370-49-2 MolWeight:350 RetIndex:3169

CompName:Methyl cis-13,16-Docosadienate ; (13Z,16E)-docosa-13,16-dienoic acid

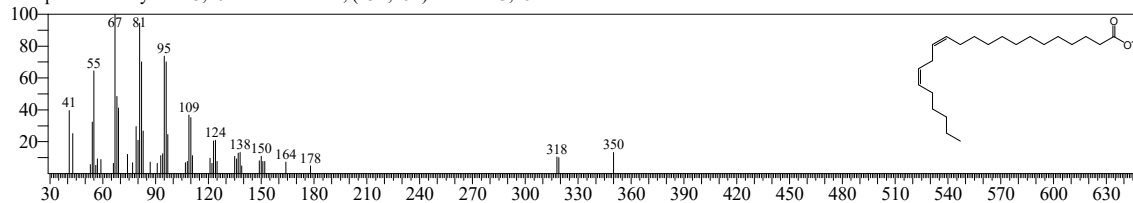

Hit#:2 Entry:21 Library:FA\_ME\_SP2560\_EI\_V3.lib

SI:53 Formula:C19H34O2 CAS:60-33-3 MolWeight:294 RetIndex:2775

CompName:Methyl linoleate ; Octadeca-9,12-dienoic acid

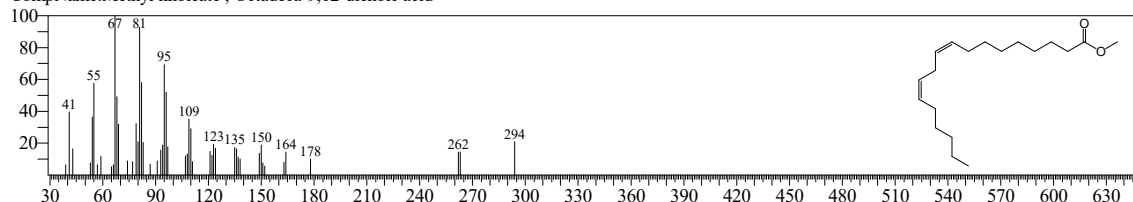

Hit#:3 Entry:20 Library:FA\_ME\_SP2560\_EI\_V3.lib

SI:52 Formula:C19H34O2 CAS:506-21-8 MolWeight:294 RetIndex:2727

CompName:Methyl linolelaidate ; (9E,12E)-octadeca-9,12-dienoic acid

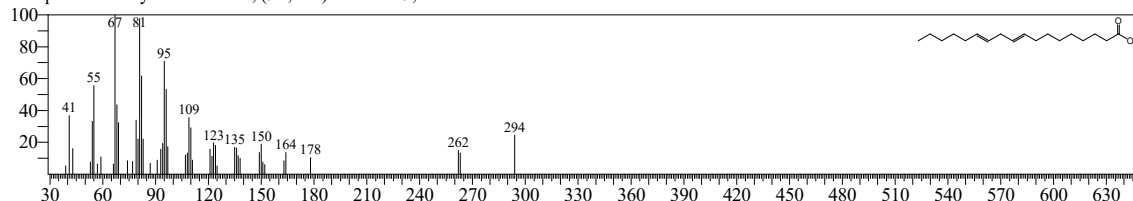

Hit#:4 Entry:27 Library:FA\_ME\_SP2560\_EI\_V3.lib

SI:52 Formula:C21H38O2 CAS:2091-39-6 MolWeight:322 RetIndex:2973

CompName:Methyl cis-11,14-Icosadienoate ; Icosa-11,14-dienoic acid

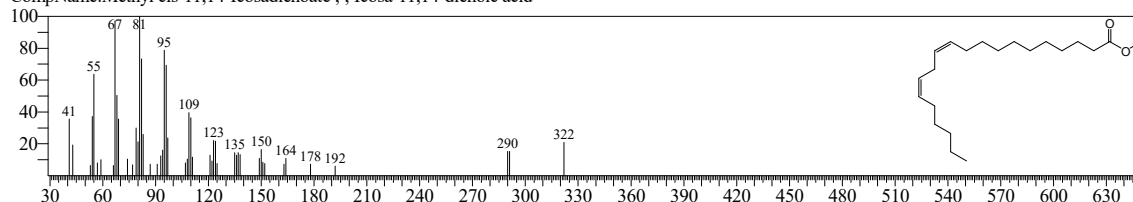

Hit#:5 Entry:11 Library:FA\_ME\_SP2560\_EI\_V3.lib

SI:52 Formula:C16H30O2 CAS:84743-29-3 MolWeight:254 RetIndex:2388

CompName:Methyl cis-10-pentadecenoate ; (Z)-pentadec-10-enoic acid

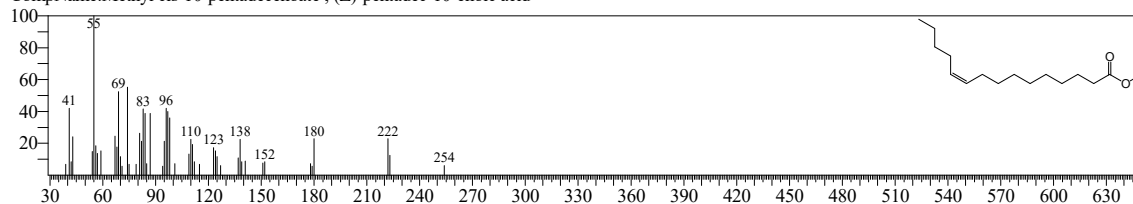

# TNAU

<< Target >>

Line#:5 R.Time:13.445(Scan#:1690) MassPeaks:415

RawMode:Averaged 13.440-13.450(1689-1691) BasePeak:155.10(14720)

BG Mode:Calc. from Peak Group 1 - Event 1 Q3 Scan

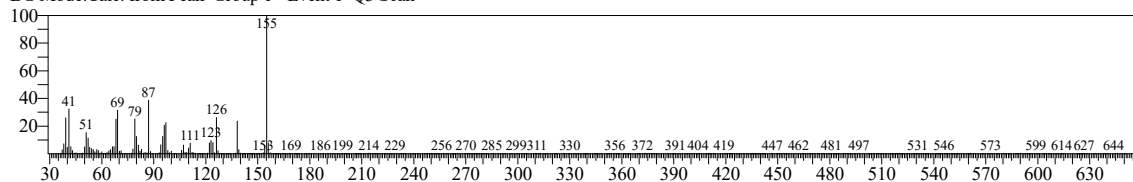

Hit#:1 Entry:34 Library:FA\_ME\_SP2560\_EI\_V3.lib

SI:54 Formula:C23H42O2 CAS:7370-49-2 MolWeight:350 RetIndex:3169

CompName:Methyl cis-13,16-Docosadienate ; (13Z,16E)-docosa-13,16-dienoic acid

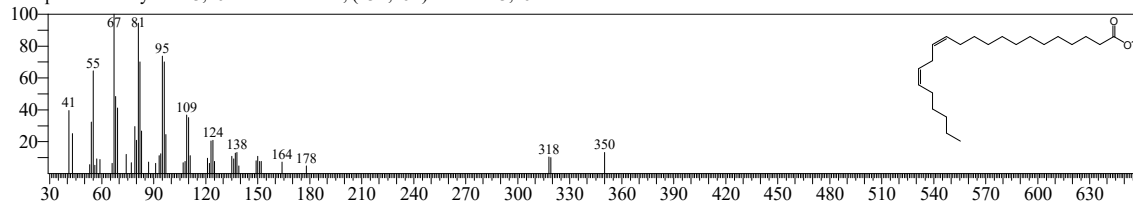

Hit#:2 Entry:21 Library:FA\_ME\_SP2560\_EI\_V3.lib

SI:52 Formula:C19H34O2 CAS:60-33-3 MolWeight:294 RetIndex:2775

CompName:Methyl linoleate ; Octadeca-9,12-dienoic acid

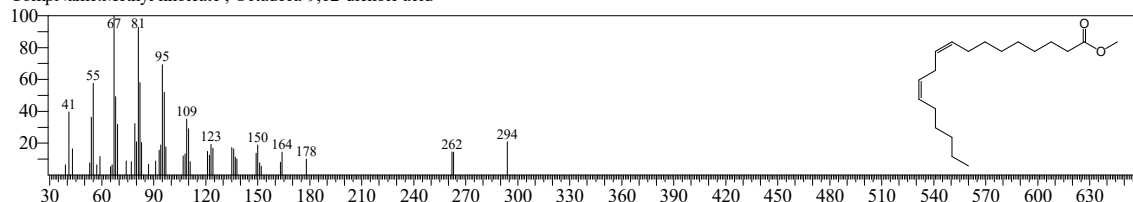

Hit#:3 Entry:20 Library:FA\_ME\_SP2560\_EI\_V3.lib

SI:52 Formula:C19H34O2 CAS:506-21-8 MolWeight:294 RetIndex:2727

CompName:Methyl linolelaidate ; (9E,12E)-octadeca-9,12-dienoic acid

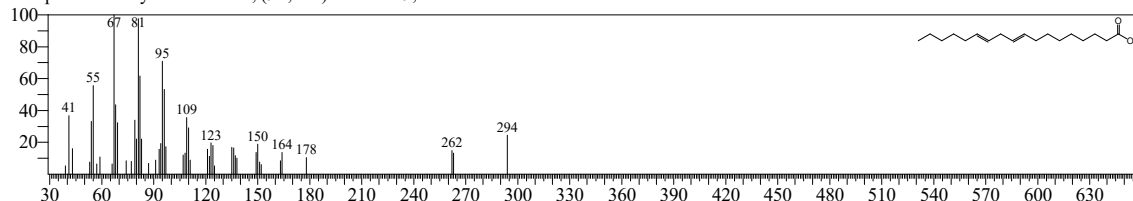

Hit#:4 Entry:27 Library:FA\_ME\_SP2560\_EI\_V3.lib

SI:52 Formula:C21H38O2 CAS:2091-39-6 MolWeight:322 RetIndex:2973

CompName:Methyl cis-11,14-Icosadienoate ; Icosa-11,14-dienoic acid

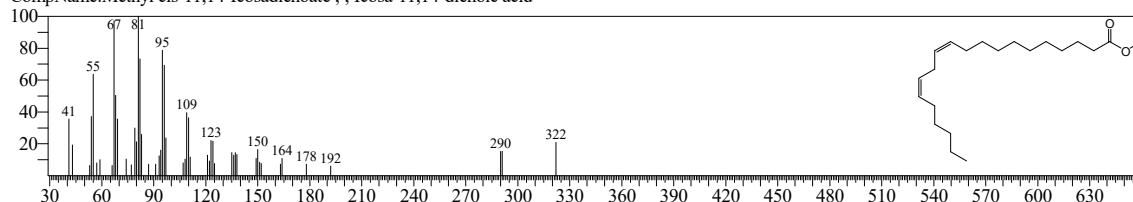

Hit#:5 Entry:11 Library:FA\_ME\_SP2560\_EI\_V3.lib

SI:51 Formula:C16H30O2 CAS:84743-29-3 MolWeight:254 RetIndex:2388

CompName:Methyl cis-10-pentadecenoate ; (Z)-pentadec-10-enoic acid

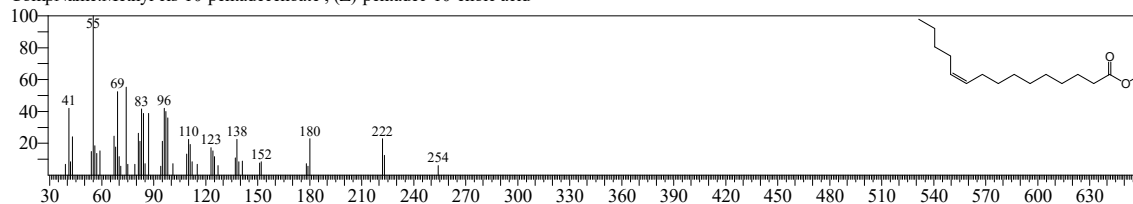

# TNAU

<< Target >>

Line#6 R.Time:15.820(Scan#:2165) MassPeaks:332

RawMode:Averaged 15.815-15.825(2164-2166) BasePeak:73.05(1418)

BG Mode:Calc. from Peak Group 1 - Event 1 Q3 Scan

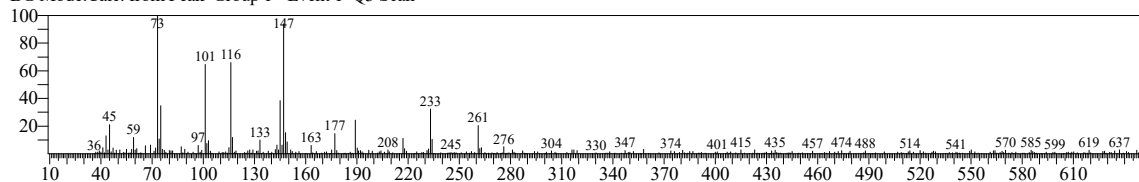

Hit#1 Entry:169946 Library:NIST20M1.lib

SI:74 Formula:C<sub>12</sub>H<sub>26</sub>O<sub>5</sub>Si<sub>2</sub> CAS:0-00-0 MolWeight:306 RetIndex:1380

CompName:Malic acid 1-ethyl ester, 2TMS \$ 1-Ethyl 4-(trimethylsilyl) 2-((trimethylsilyl)oxy)succinate \$ (./-.)-1-Ethyl hydroxybutanedioate, 2TMS \$ 1

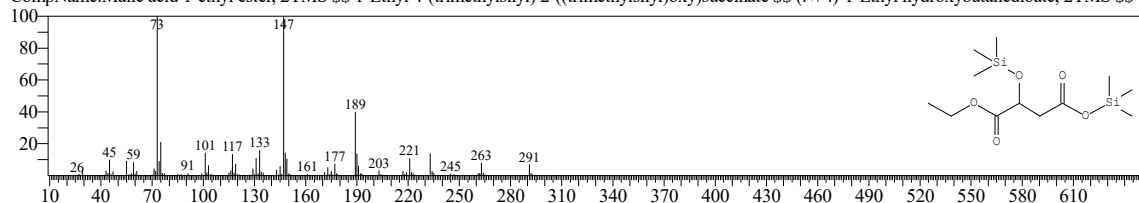

Hit#2 Entry:33630 Library:NIST20R.lib

SI:74 Formula:C<sub>12</sub>H<sub>28</sub>O<sub>3</sub>Si<sub>2</sub> CAS:136788-82-4 MolWeight:276 RetIndex:1213

CompName:Hexanoic acid, 3-trimethylsilyloxy, trimethylsilyl ester \$ Trimethylsilyl 3-[(trimethylsilyl)oxy]hexanoate \$ 3-Trimethylsilyloxy(trimethylsilyl)ea

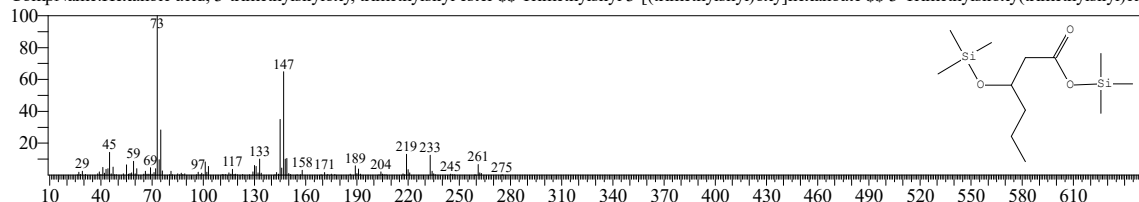

Hit#3 Entry:184469 Library:NIST20M1.lib

SI:72 Formula:C<sub>15</sub>H<sub>34</sub>O<sub>3</sub>Si<sub>2</sub> CAS:0-00-0 MolWeight:318 RetIndex:1342

CompName:Lactic acid, 2TBDMS derivative \$ Lactic acid ditbdms

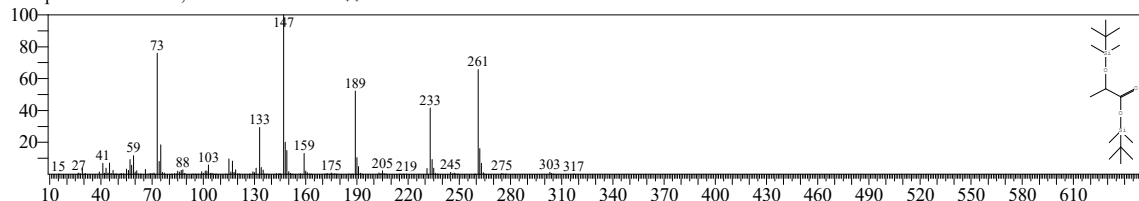

Hit#4 Entry:117877 Library:NIST20M1.lib

SI:72 Formula:C<sub>10</sub>H<sub>22</sub>O<sub>4</sub>Si<sub>2</sub> CAS:0-00-0 MolWeight:262 RetIndex:1317

CompName:Erythrono-1,4-lactone, 2TMS derivative \$ D-Erythronic acid .gamma.-lactone, bis(trimethylsilyl) ether

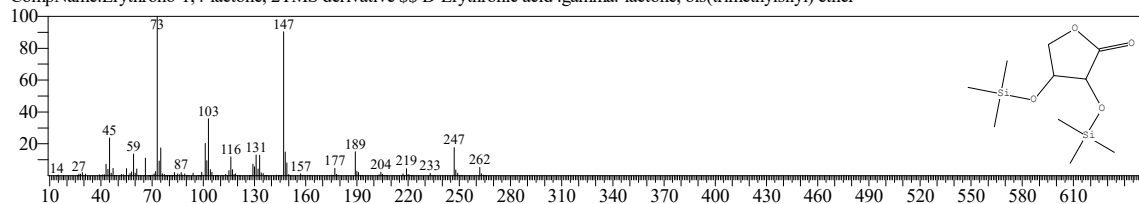

Hit#5 Entry:108685 Library:NIST20M1.lib

SI:72 Formula:C<sub>9</sub>H<sub>23</sub>ClO<sub>2</sub>Si<sub>2</sub> CAS:73639-52-8 MolWeight:254 RetIndex:1049

CompName:3-Chloro-1,2-propanediol, 2TMS derivative \$ 3-Chloro-1,2-propanediol, bis(trimethylsilyl) ether \$ 4-(Chloromethyl)-2,2,7,7-tetramethyl-3,6-

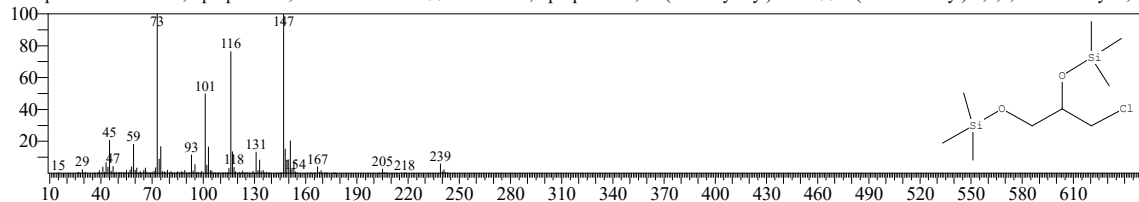

# TNAU

<< Target >>

Line#:7 R.Time:28.295(Scan#:4660) MassPeaks:415

RawMode:Averaged 28.290-28.300(4659-4661) BasePeak:73.05(857)

BG Mode:Calc. from Peak Group 1 - Event 1 Q3 Scan

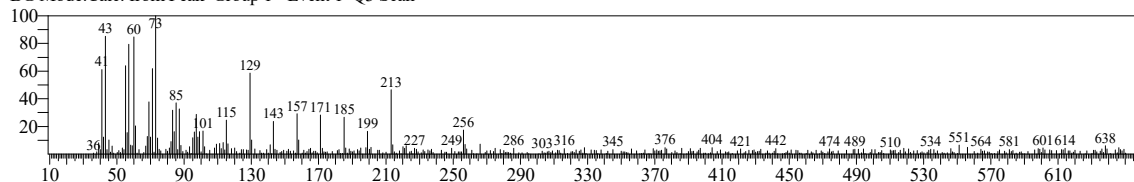

Hit#:1 Entry:31600 Library:NIST20R.lib

SI:89 Formula:C16H32O2 CAS:57-10-3 MolWeight:256 RetIndex:1968

CompName:n-Hexadecanoic acid \$\$ Hexadecanoic acid \$\$ n-Hexadecic acid \$\$ Palmitic acid \$\$ Pentadecanecarboxylic acid \$\$ 1-Pentadecanecarboxylic

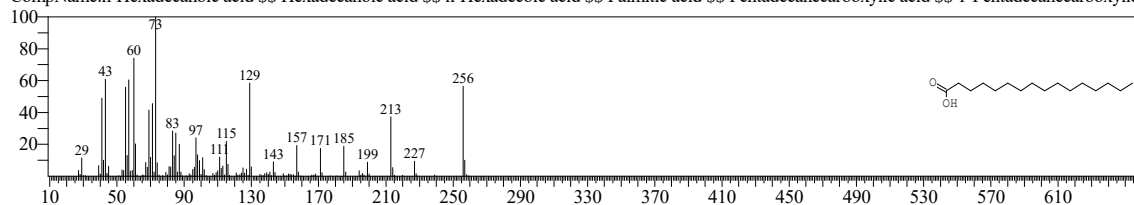

Hit#:2 Entry:44286 Library:NIST20M2.lib

SI:89 Formula:C38H68O8 CAS:28474-90-0 MolWeight:652 RetIndex:4765

CompName:L-(+)-Ascorbic acid 2,6-dihexadecanoate

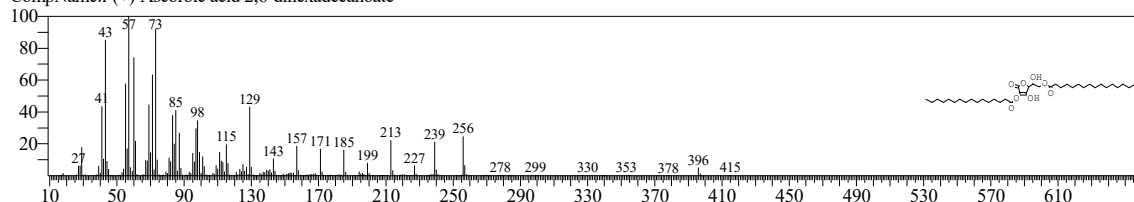

Hit#:3 Entry:29890 Library:NIST20R.lib

SI:89 Formula:C15H30O2 CAS:1002-84-2 MolWeight:242 RetIndex:1869

CompName:Pentadecanoic acid \$\$ Pentadecylic acid \$\$ n-Pentadecanoic acid \$\$ n-Pentadecylic acid

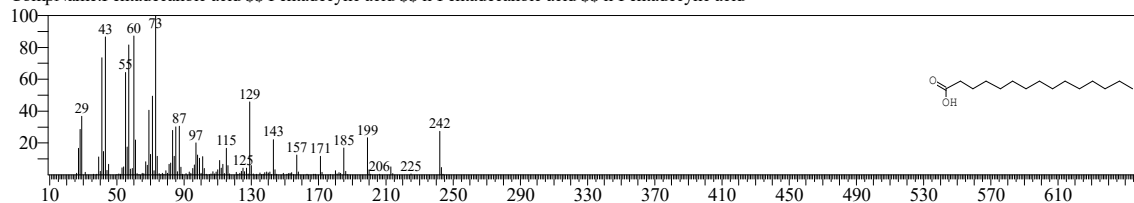

Hit#:4 Entry:144781 Library:NIST20M1.lib

SI:85 Formula:C18H36O2 CAS:57-11-4 MolWeight:284 RetIndex:2167

CompName:Octadecanoic acid \$\$ Stearic acid \$\$ n-Octadecanoic acid \$\$ Humko Industriene R \$\$ Hydrofol Acid 150 \$\$ Hystrene S-97 \$\$ Hystrene T-70 \$

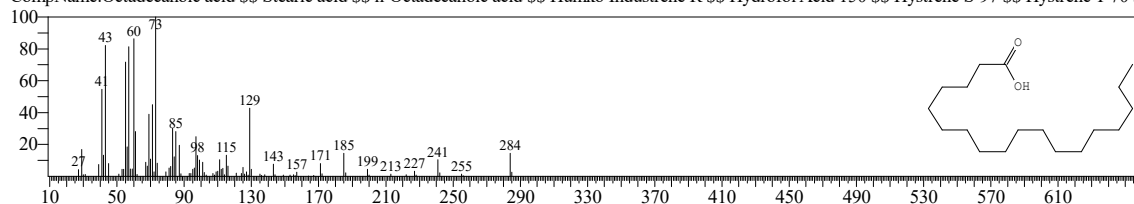

Hit#:5 Entry:81713 Library:NIST20M1.lib

SI:85 Formula:C14H28O2 CAS:544-63-8 MolWeight:228 RetIndex:1769

CompName:Tetradecanoic acid \$\$ Myristic acid \$\$ n-Tetradecanoic acid \$\$ n-Tetradecic acid \$\$ Neo-Fat 14 \$\$ Univol U 316S \$\$ 1-Tridecanecarboxylic ;

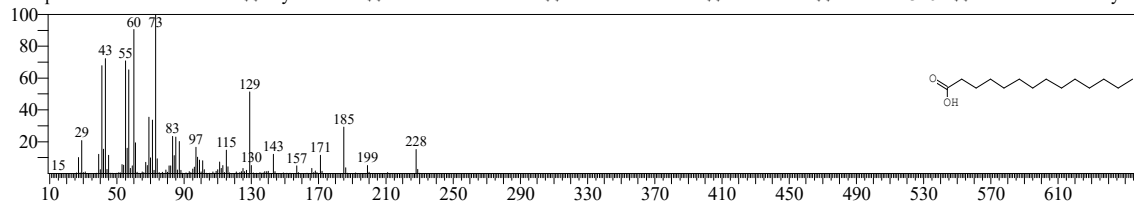

Supplement: Supplementary file 43 [file supplementary]
