# Supplementary material for: Comparative Metabolomics Profiling Reveals Key Metabolites and Associated Pathways Regulating Tuber Dormancy in White Yam (<em>Dioscorea rotundata</em>)
Source: Preprints.org preprint supplement (doi:10.20944/preprints202303.0378.v1), 2023-03-21

# TNAU

## Sample Information

Analyzed by : Admin  
 Analyzed : 02-Sep-22 11:09:54 AM  
 Sample Type : Unknown  
 Level # : 1  
 Sample Name : Sample  
 Sample ID : 7-2  
 IS Amount : [1]=1  
 Sample Amount : 1  
 Dilution Factor : 1  
 Vial # : 8  
 Injection Volume : 2.00  
 Data File : D:\GCMS-8040NX\Sep 2022\Users\01.09.2022\010920222021.qgd  
 Org Data File : D:\GCMS-8040NX\Sep 2022\Users\01.09.2022\010920222021.qgd  
 Method File : D:\GCMS-8040NX\Sep 2022\Method\Scan\_methodfile.qgm  
 Org Method File : D:\GCMS-8040NX\Sep 2022\Method\Scan\_methodfile.qgm  
 Report File :  
 Tuning File : D:\GCMS-8040NX\Aug 2022\Tuning Data\TUNING 25082022.qgt  
 Modified by : Admin  
 Modified : 05-Sep-22 11:04:46 AM

Chromatogram Sample D:\GCMS-8040NX\Sep 2022\Users\01.09.2022\010920222021.qgd

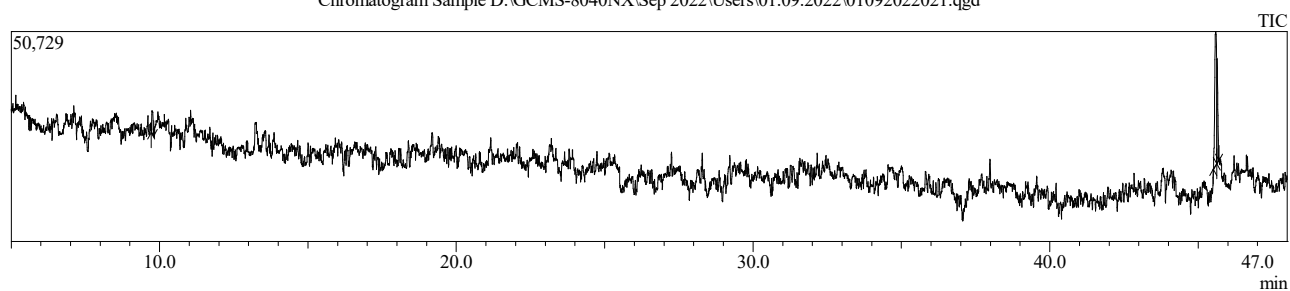

## Peak Report TIC

| Peak# | R.Time | Area   | Area%  | Height | Height% | A/H  | Similarity | Name                    |
|-------|--------|--------|--------|--------|---------|------|------------|-------------------------|
| 1     | 9.743  | 17011  | 7.97   | 5469   | 8.68    | 3.11 | 41         | Oxalic acid-2TMS        |
| 2     | 45.595 | 146916 | 68.86  | 32299  | 51.27   | 4.55 | 86         | Diosgenin               |
| 3     | 45.640 | 49414  | 23.16  | 25230  | 40.05   | 1.96 | 27         | Methyl gamma-linolenate |
|       |        | 213341 | 100.00 | 62998  | 100.00  |      |            |                         |

Library

# TNAU

<< Target >>

Line#:1 R.Time:9.745(Scan#:950) MassPeaks:387

RawMode:Averaged 9.740-9.750(949-951) BasePeak:281.05(441)

BG Mode:Calc. from Peak Group 1 - Event 1 Q3 Scan

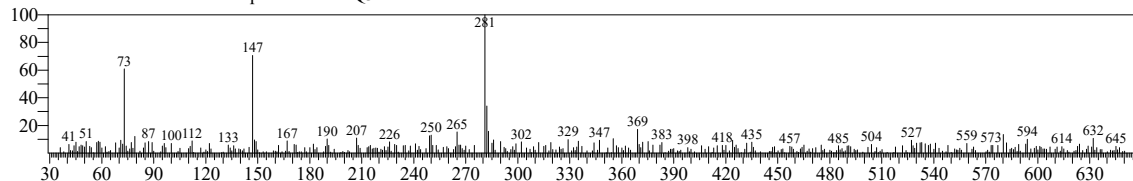

Hit#:1 Entry:22 Library:OA\_TMS\_DB5\_67min\_V3.lib

SI:41 Formula:C8H18O4Si2 CAS:144-62-7 MolWeight:234 RetIndex:1129

CompName:Oxalic acid-2TMS ; oxalic acid

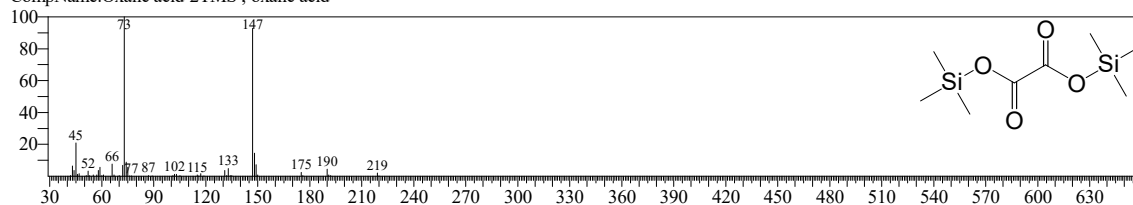

Hit#:2 Entry:100 Library:OA\_TMS\_DB5\_67min\_V3.lib

SI:40 Formula: CAS:0-00-0 MolWeight:264 RetIndex:1346

CompName:Fumaric acid-13C4-2TMS ;

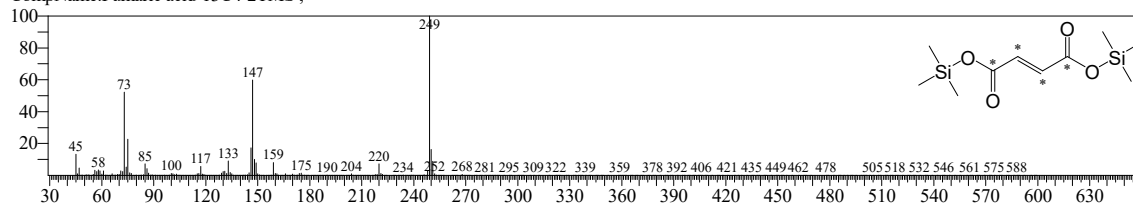

Hit#:3 Entry:184 Library:OA\_TMS\_DB5\_67min\_V3.lib

SI:40 Formula:C14H24O3Si2 CAS:614-75-5 MolWeight:296 RetIndex:1579

CompName:2-Hydroxyphenylacetic acid-2TMS ; 2-(2-hydroxyphenyl)acetic acid

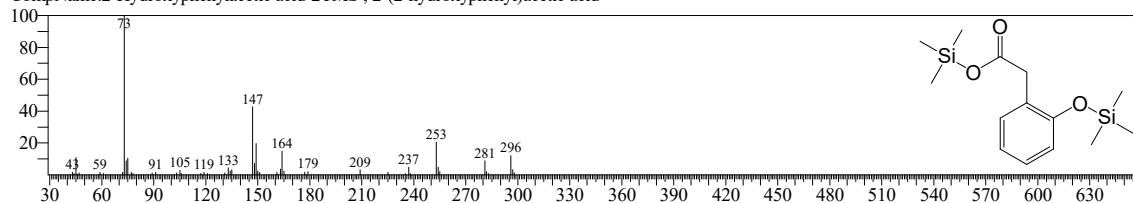

Hit#:4 Entry:24 Library:OA\_TMS\_DB5\_67min\_V3.lib

SI:39 Formula: CAS:0-00-0 MolWeight:236 RetIndex:1130

CompName:Oxalic acid-13C2-2TMS ;

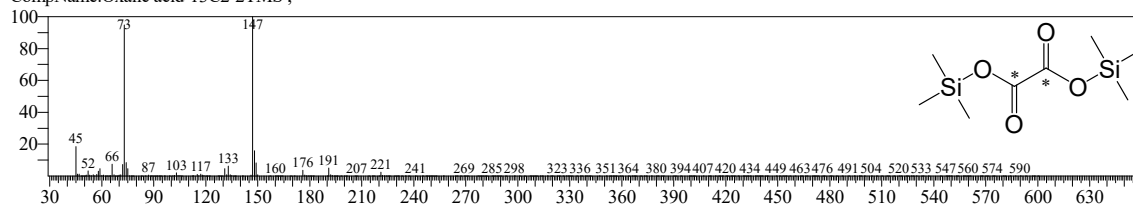

Hit#:5 Entry:13 Library:OA\_TMS\_DB5\_67min\_V3.lib

SI:39 Formula:C8H20O3Si2 CAS:79-14-1 MolWeight:220 RetIndex:1074

CompName:Glycolic acid-2TMS ; 2-hydroxyacetic acid

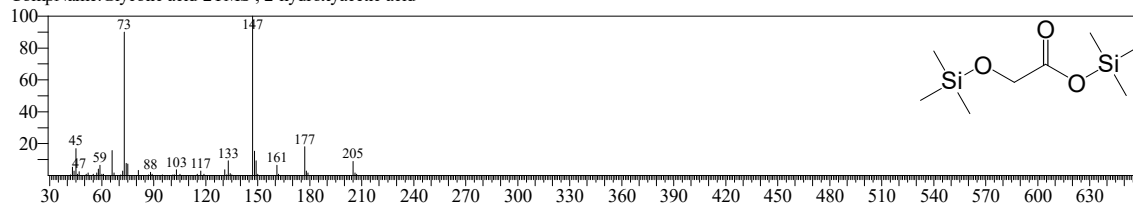

# TNAU

<< Target >>

Line#2 R.Time:45.595(Scan#:8120) MassPeaks:369

RawMode:Averaged 45.590-45.600(8119-8121) BasePeak:139.10(1748)

BG Mode:Calc. from Peak Group 1 - Event 1 Q3 Scan

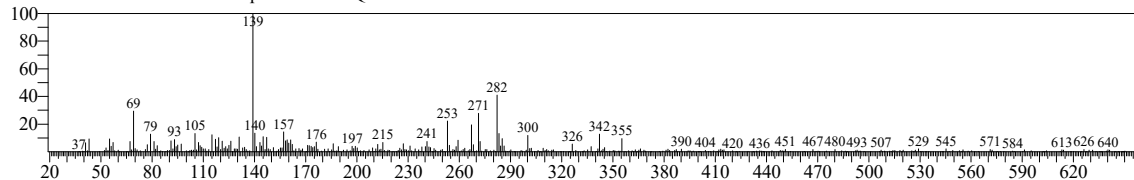

Hit#1 Entry:8297 Library:NIST20M2.lib

SI:86 Formula:C27H42O3 CAS:512-04-9 MolWeight:414 RetIndex:2844

CompName:Diosgenin \$\$ Spirost-5-en-3-ol, (3.beta.,25R)- \$\$ Spirost-5-en-3.beta.-ol, (25R)- \$\$ Nitrogenin \$\$ 25D-spirost-5-en-3.beta.-ol \$\$ Spiro(8H-nap

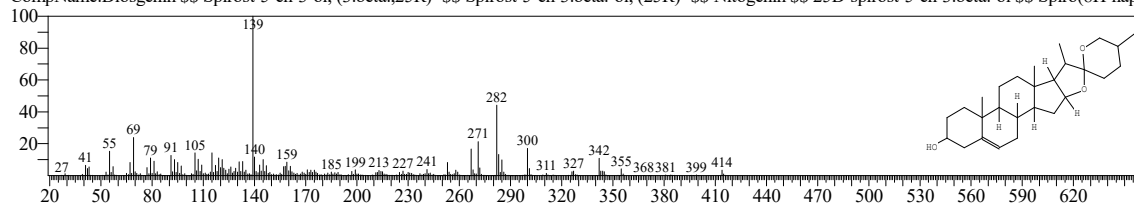

Hit#2 Entry:41561 Library:NIST20R.lib

SI:77 Formula:C27H42O2 CAS:32277-73-9 MolWeight:398 RetIndex:2713

CompName:Des-N-solasodine \$\$ Furosta-5,20(22)-dien-3-ol #

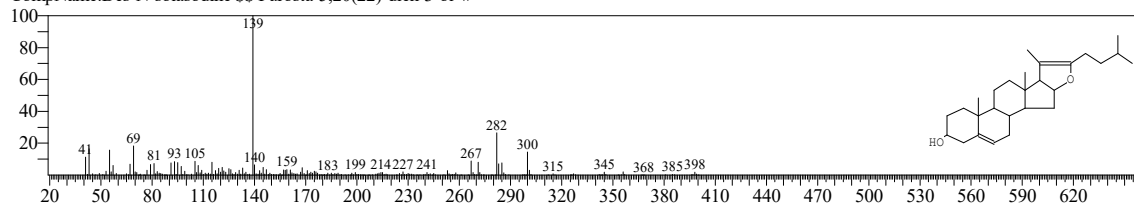

Hit#3 Entry:24878 Library:NIST20M2.lib

SI:76 Formula:C29H44O4 CAS:1061-54-7 MolWeight:456 RetIndex:2984

CompName:Spirost-5-en-3-ol, acetate, (3.beta.,25R)- \$\$ Diosgenin acetate \$\$ Spirost-5-en-3.beta.-ol, acetate, (25R)- \$\$ Spirost-5-en-3.beta.-ol, acetate, (2

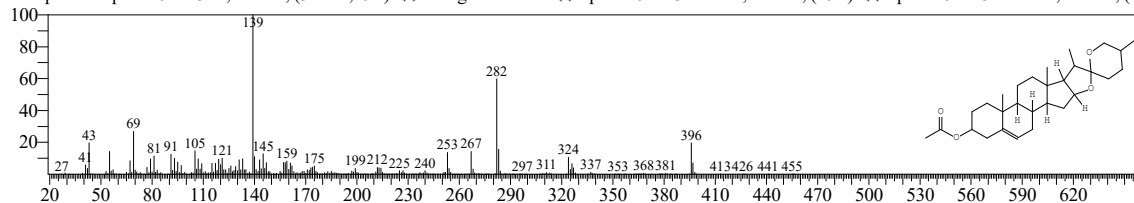

Hit#4 Entry:14852 Library:NIST20M2.lib

SI:75 Formula:C28H44O3 CAS:116292-24-1 MolWeight:428 RetIndex:2793

CompName:Diosgenin methyl ether \$\$ Diosgenin Me derivative \$\$ (3.beta.,25R)-3-Methoxyspirost-5-ene \$\$ Spirost-5-ene, 3-methoxy-, (3.beta.,25R)-

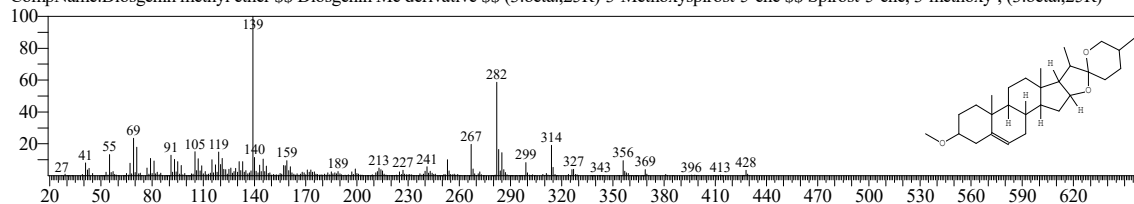

Hit#5 Entry:42677 Library:NIST20R.lib

SI:72 Formula:C29H44O4 CAS:1180-12-7 MolWeight:456 RetIndex:2984

CompName:Neodiosgenin (3.beta.,25S) acetate \$\$ Spirost-5-en-3-ol, 3-acetate, (3.beta.,25S)- \$\$ Spirost-5-en-3-ol, acetate, (3.beta.,25S)- \$\$ Spirost-5-en-3.

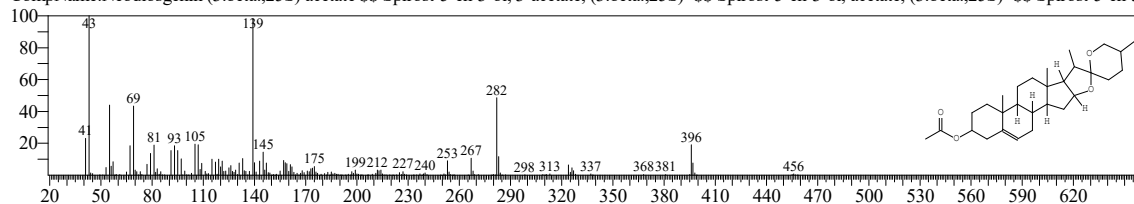

# TNAU

<< Target >>

Line#:3 R.Time:45.640(Scan#:8129) MassPeaks:343

RawMode:Averaged 45.635-45.645(8128-8130) BasePeak:79.10(98)

BG Mode:Calc. from Peak Group 1 - Event 1 Q3 Scan

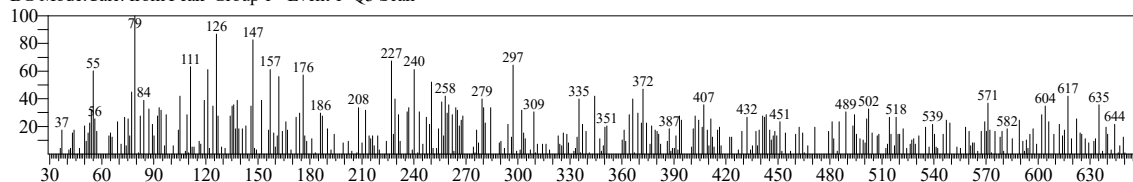

Hit#:1 Entry:23 Library:FA\_ME\_SP2560\_EI\_V3.lib

SI:27 Formula:C19H32O2 CAS:506-26-3 MolWeight:292 RetIndex:2852

CompName:Methyl gamma-linolenate ; ; Octadeca-6,9,12-trienoic acid

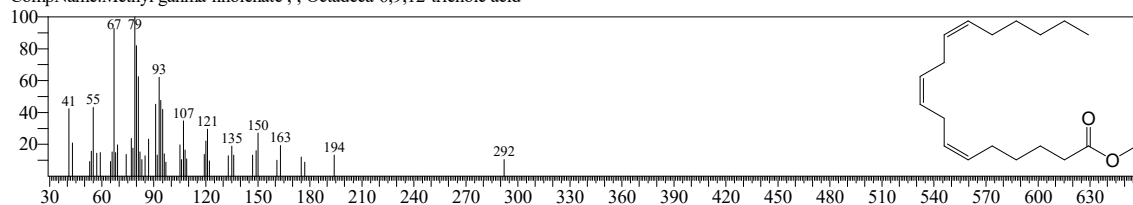

Hit#:2 Entry:33 Library:FA\_ME\_SP2560\_EI\_V3.lib

SI:26 Formula:C21H34O2 CAS:506-32-1 MolWeight:318 RetIndex:3109

CompName:Methyl arachidonate ; (5Z,8Z,11Z,14Z)-icosa-5,8,11,14-tetraenoic acid

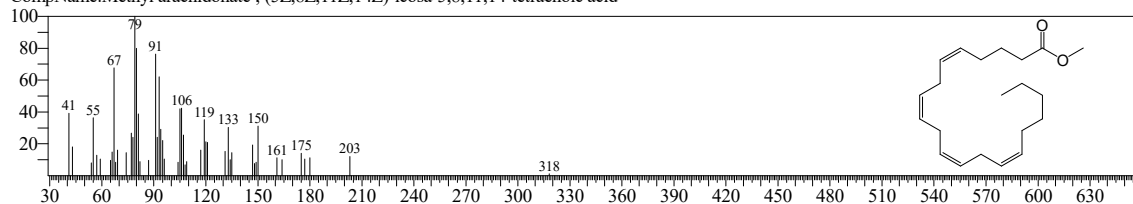

Hit#:3 Entry:25 Library:FA\_ME\_SP2560\_EI\_V3.lib

SI:26 Formula:C19H32O2 CAS:463-40-1 MolWeight:292 RetIndex:2892

CompName:Methyl linolenate ; (9Z,12Z,15Z)-octadeca-9,12,15-trienoic acid

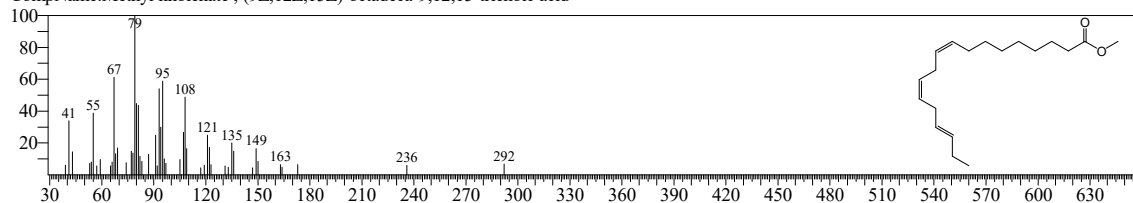

Hit#:4 Entry:38 Library:FA\_ME\_SP2560\_EI\_V3.lib

SI:25 Formula:C23H34O2 CAS:6217-54-5 MolWeight:342 RetIndex:3514

CompName:Methyl cis-4,7,10,13,16,19-Docosahexaenoate ; Docosa-4,7,10,13,16,19-hexaenoic acid

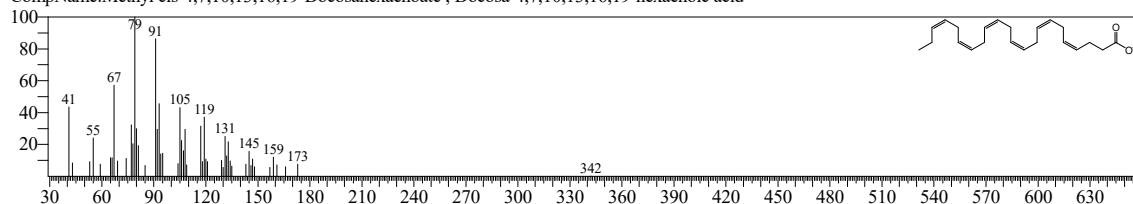

Hit#:5 Entry:31 Library:FA\_ME\_SP2560\_EI\_V3.lib

SI:25 Formula:C21H36O2 CAS:2091-27-2 MolWeight:320 RetIndex:3089

CompName:Methyl cis-11,14,17-Icosatrienoate ; Icosa-11,14,17-trienoic acid

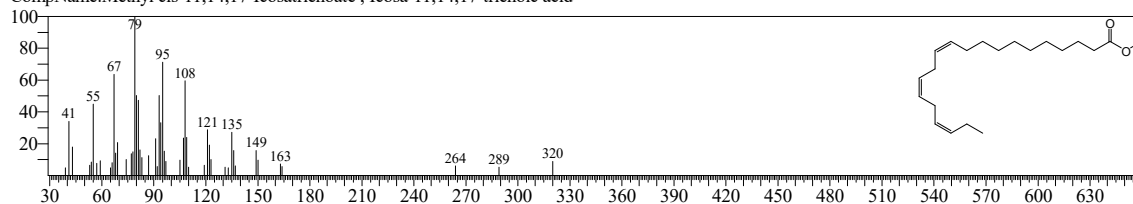

Supplement: Supplementary file 44 [file supplementary]
