# Supplementary material for: Comparative Metabolomics Profiling Reveals Key Metabolites and Associated Pathways Regulating Tuber Dormancy in White Yam (<em>Dioscorea rotundata</em>)
Source: Preprints.org preprint supplement (doi:10.20944/preprints202303.0378.v1), 2023-03-21

# TNAU

## Sample Information

Analyzed by : Admin  
 Analyzed : 02-Sep-22 7:05:08 PM  
 Sample Type : Unknown  
 Level # : 1  
 Sample Name : Sample  
 Sample ID : 10-2  
 IS Amount : [1]=1  
 Sample Amount : 1  
 Dilution Factor : 1  
 Vial # : 11  
 Injection Volume : 5.00  
 Data File : D:\GCMS-8040NX\Sep 2022\Users\01.09.2022\01092022030.qgd  
 Org Data File : D:\GCMS-8040NX\Sep 2022\Users\01.09.2022\01092022030.qgd  
 Method File : D:\GCMS-8040NX\Sep 2022\Method\Scan\_methodfile.qgm  
 Org Method File : D:\GCMS-8040NX\Sep 2022\Method\Scan\_methodfile.qgm  
 Report File :  
 Tuning File : D:\GCMS-8040NX\Aug 2022\Tuning Data\TUNING 25082022.qgt  
 Modified by : Admin  
 Modified : 05-Sep-22 11:10:11 AM

Chromatogram Sample D:\GCMS-8040NX\Sep 2022\Users\01.09.2022\01092022030.qgd

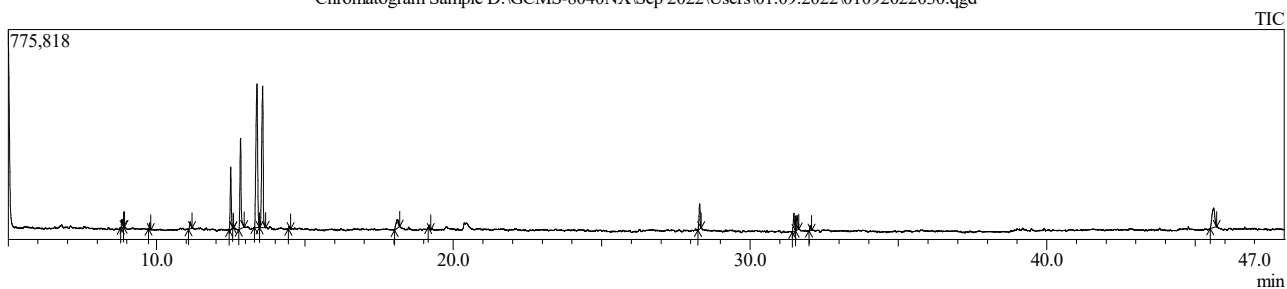

## Peak Report TIC

| Peak# | R.Time | Area    | Area%  | Height  | Height% | A/H  | Similarity | Name                                        |
|-------|--------|---------|--------|---------|---------|------|------------|---------------------------------------------|
| 1     | 8.836  | 91525   | 1.30   | 30516   | 1.47    | 3.00 | 85         | 1-Butanol, 3-methyl-, acetate               |
| 2     | 8.895  | 8497    | 0.12   | 7901    | 0.38    | 1.08 | 19         | Caffeine                                    |
| 3     | 9.771  | 50996   | 0.73   | 24524   | 1.19    | 2.08 | 95         | Pentasiloxane, dodecamethyl-                |
| 4     | 11.137 | 84951   | 1.21   | 25682   | 1.24    | 3.31 | 42         | Methyl myristoleate                         |
| 5     | 12.499 | 594786  | 8.48   | 230832  | 11.16   | 2.58 | 73         | 2,5-Cyclohexadiene-1,4-dione, dioxime       |
| 6     | 12.575 | 185     | 0.00   | 1681    | 0.08    | 0.11 | 14         | Dimethylglycine-TMS                         |
| 7     | 12.829 | 925171  | 13.19  | 334850  | 16.18   | 2.76 | 74         | 1,3-Benzodioxol-5-ol                        |
| 8     | 13.382 | 2109301 | 30.06  | 530228  | 25.63   | 3.98 | 53         | Methyl cis-13,16-Docosadienate              |
| 9     | 13.573 | 1776467 | 25.32  | 523024  | 25.28   | 3.40 | 53         | Methyl cis-13,16-Docosadienate              |
| 10    | 14.472 | 24659   | 0.35   | 10004   | 0.48    | 2.46 | 75         | 5-(4-Methylbenzyl)-1,3,4-thiadiazol-2-amine |
| 11    | 18.125 | 187083  | 2.67   | 31176   | 1.51    | 6.00 | 94         | D-Allose                                    |
| 12    | 19.190 | 28558   | 0.41   | 12911   | 0.62    | 2.21 | 84         | 2,4-Di-tert-butylphenoxytrimethylsilane     |
| 13    | 28.301 | 244108  | 3.48   | 92967   | 4.49    | 2.63 | 95         | n-Hexadecanoic acid                         |
| 14    | 31.479 | 195899  | 2.79   | 66998   | 3.24    | 2.92 | 95         | 10E,12Z-Octadecadienoic acid                |
| 15    | 31.585 | 165408  | 2.36   | 54056   | 2.61    | 3.06 | 88         | cis-9-Hexadecenal                           |
| 16    | 32.032 | 50697   | 0.72   | 19693   | 0.95    | 2.57 | 91         | Octadecanoic acid                           |
| 17    | 45.623 | 478058  | 6.81   | 72111   | 3.49    | 6.63 | 90         | Diosgenin                                   |
|       |        | 7016349 | 100.00 | 2069154 | 100.00  |      |            |                                             |

Library

# TNAU

<< Target >>

Line#:1 R.Time:8.835(Scan#:768) MassPeaks:340

RawMode:Averaged 8.830-8.840(767-769) BasePeak:43.05(5526)

BG Mode:Calc. from Peak Group 1 - Event 1 Q3 Scan

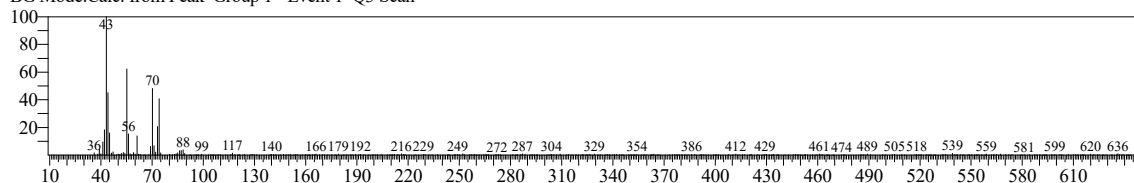

Hit#:1 Entry:6784 Library:NIST20R.lib

SI:85 Formula:C7H14O2 CAS:123-92-2 MolWeight:130 RetIndex:820

CompName:1-Butanol, 3-methyl-, acetate \$\$ Isopentyl alcohol, acetate \$\$ Acetic acid, 3-methylbutyl ester \$\$ Banana oil \$\$ Isoamyl acetate \$\$ Isoamyl etha

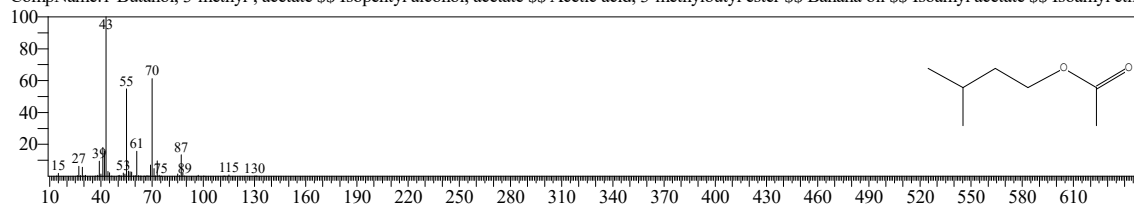

Hit#:2 Entry:8685 Library:NIST20M1.lib

SI:82 Formula:C7H14O2 CAS:628-63-7 MolWeight:130 RetIndex:884

CompName:Acetic acid, pentyl ester \$\$ n-Amyl acetate \$\$ n-Pentyl acetate \$\$ Amyl acetate \$\$ Birnenöl \$\$ Pentyl acetate \$\$ Acetic acid, amyl ester \$\$ An

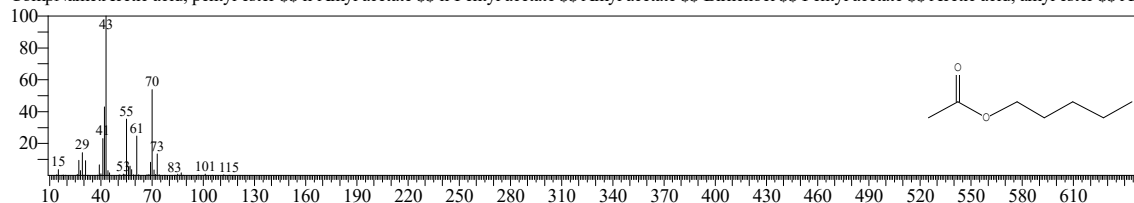

Hit#:3 Entry:6819 Library:NIST20R.lib

SI:82 Formula:C7H14O2 CAS:624-41-9 MolWeight:130 RetIndex:820

CompName:1-Butanol, 2-methyl-, acetate \$\$ 2-Methyl-1-butyl acetate \$\$ 2-Methylbutyl acetate \$\$ Acetic acid 2-methylbutyl ester \$\$ 2-Methylbutyl acetate

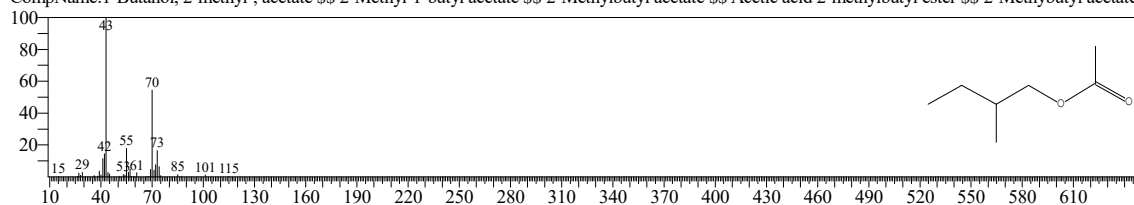

Hit#:4 Entry:8539 Library:NIST20M1.lib

SI:80 Formula:C6H10O3 CAS:6628-79-1 MolWeight:130 RetIndex:1046

CompName:Pentanoic acid, 3-methyl-4-oxo- \$\$ 3-Methyl-4-oxopentanoic acid \$\$ Levulinic acid, 3-methyl \$\$ 3-Methyllevulinic acid

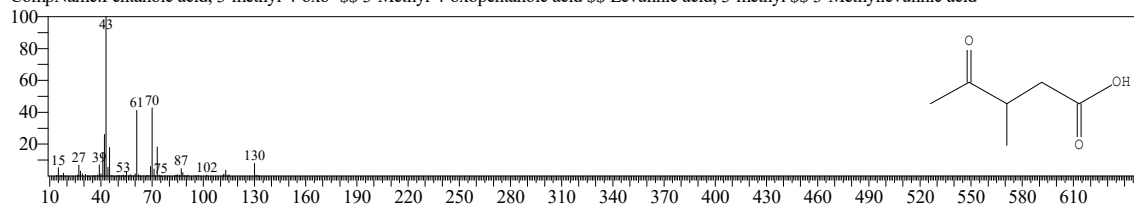

Hit#:5 Entry:1220 Library:NIST20R.lib

SI:80 Formula:C4H8O2 CAS:590-90-9 MolWeight:88 RetIndex:798

CompName:CH3C(O)CH2CH2OH \$\$ Methylolacetone \$\$ Monomethylolacetone \$\$ 3-Ketobutan-1-ol \$\$ 3-Oxo-1-butanol \$\$ 3-Oxobutanol \$\$ 4-Butanol-

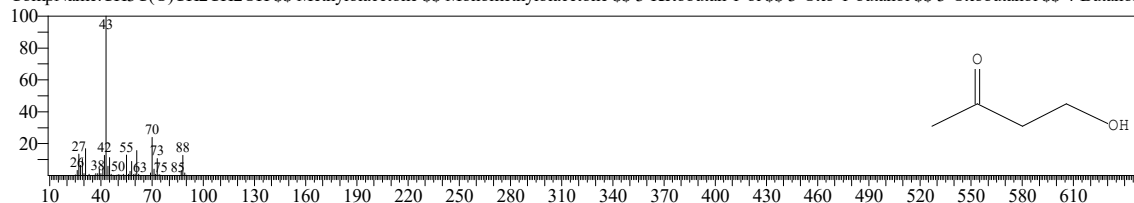

# TNAU

<< Target >>

Line#:2 R.Time:8.895(Scan#:780) MassPeaks:324

RawMode:Averaged 8.890-8.900(779-781) BasePeak:36.00(71)

BG Mode:Calc. from Peak Group 1 - Event 1 Q3 Scan

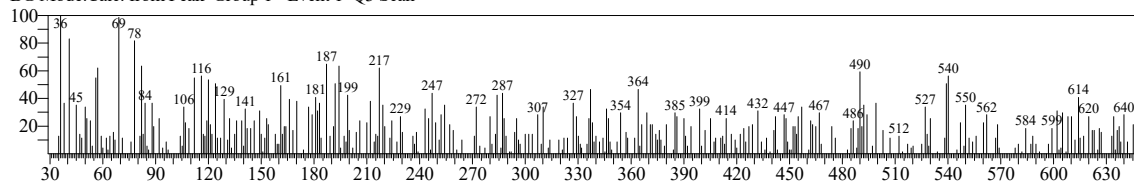

Hit#:1 Entry:342 Library:OA\_TMS\_DB5\_67min\_V3.lib

SI:19 Formula:C<sub>8</sub>H<sub>10</sub>N<sub>4</sub>O<sub>2</sub> CAS:58-08-2 MolWeight:194 RetIndex:1867

CompName:Caffeine ; 1,3,7-trimethylpurine-2,6-dione

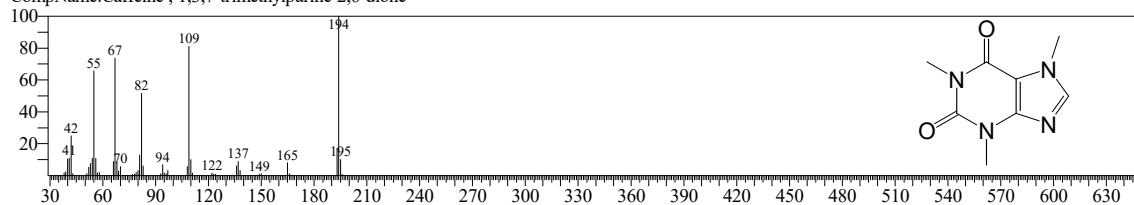

Hit#:2 Entry:477 Library:OA\_TMS\_DB5\_67min\_V3.lib

SI:16 Formula:C<sub>21</sub>H<sub>46</sub>O<sub>2</sub>Si CAS:112-92-5 MolWeight:342 RetIndex:2156

CompName:Octadecanol-TMS ; octadecan-1-ol

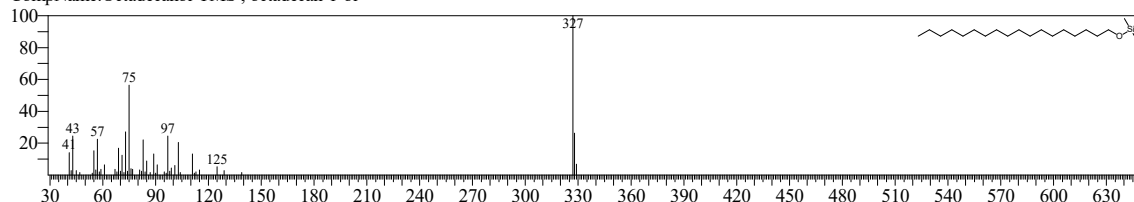

Hit#:3 Entry:176 Library:OA\_TMS\_DB5\_67min\_V3.lib

SI:15 Formula:C<sub>13</sub>H<sub>27</sub>NO<sub>3</sub>Si<sub>2</sub> CAS:35842-45-6 MolWeight:301 RetIndex:1564

CompName:Tiglylglycine-2TMS ; 2-[[[(E)-2-methylbut-2-enoyl]amino]acetic acid

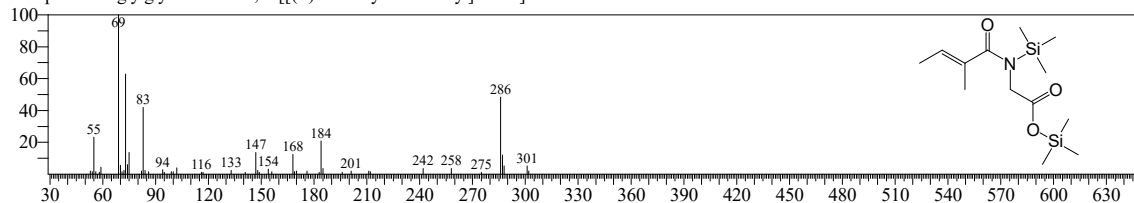

Hit#:4 Entry:91 Library:OA\_TMS\_DB5\_67min\_V3.lib

SI:14 Formula:C<sub>11</sub>H<sub>22</sub>O<sub>2</sub>Si CAS:1871-67-6 MolWeight:214 RetIndex:1313

CompName:2-Octenoic acid-TMS ; (E)-oct-2-enoic acid

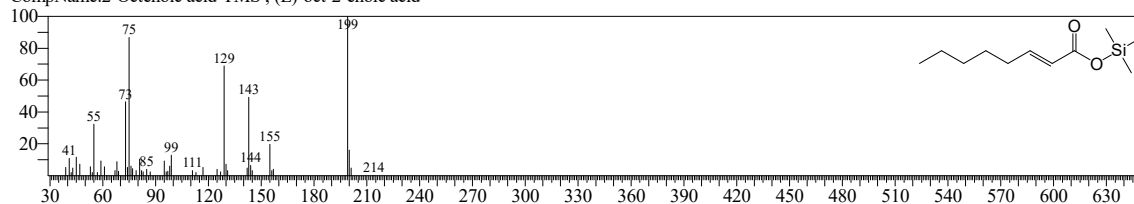

Hit#:5 Entry:567 Library:OA\_TMS\_DB5\_67min\_V3.lib

SI:14 Formula:C<sub>30</sub>H<sub>54</sub>O<sub>4</sub>Si CAS:57-88-5 MolWeight:458 RetIndex:3221

CompName:Cholesterol-TMS ; (3S,8S,9S,10R,13R,14S,17R)-10,13-dimethyl-17-[(2R)-6-methylheptan-2-yl]-2,3,4,7,8,9,11,12,14,15,16,17-dodec

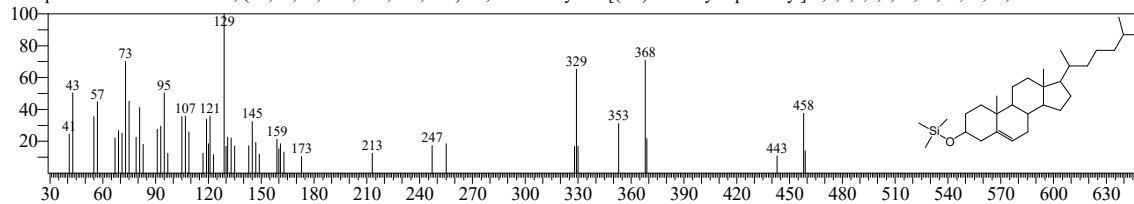

# TNAU

<< Target >>

Line#3 R.Time:9.770(Scan#:955) MassPeaks:365

RawMode:Averaged 9.765-9.775(954-956) BasePeak:281.00(5472)

BG Mode:Calc. from Peak Group 1 - Event 1 Q3 Scan

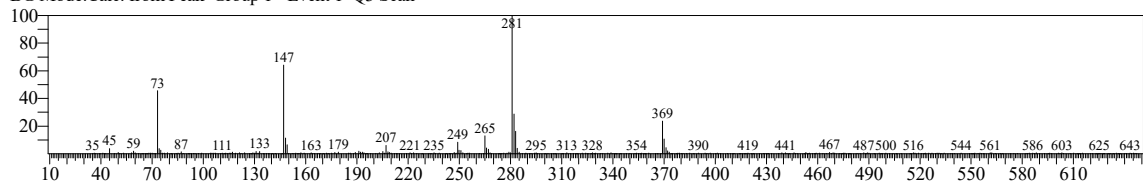

Hit#:1 Entry:40975 Library:NIST20R.lib

SI:95 Formula:C<sub>12</sub>H<sub>36</sub>O<sub>4</sub>Si<sub>5</sub> CAS:141-63-9 MolWeight:384 RetIndex:1068

CompName:Pentasiloxane, dodecamethyl- \$\$ Dodecamethylpentasiloxane \$\$ 1,1,1,3,3,5,5,7,7,9,9-Dodecamethylpentasiloxane #

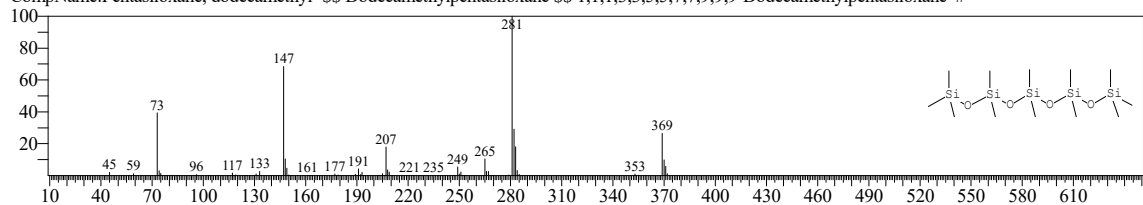

Hit#:2 Entry:249272 Library:NIST20M1.lib

SI:84 Formula:C<sub>12</sub>H<sub>36</sub>O<sub>4</sub>Si<sub>5</sub> CAS:3555-47-3 MolWeight:384 RetIndex:1068

CompName:Trisiloxane, 1,1,1,5,5,5-hexamethyl-3,3-bis[(trimethylsilyl)oxy]- \$\$ Tetrakis(trimethylsiloxy)silane \$\$ Trisiloxane, 1,1,1,5,5,5-hexamethyl-3,3-b

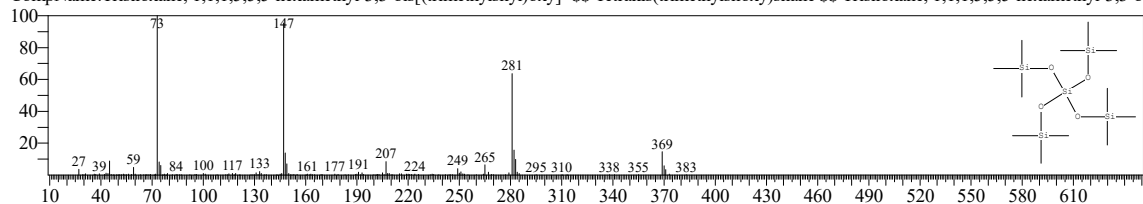

Hit#:3 Entry:27848 Library:NIST20M2.lib

SI:82 Formula:C<sub>18</sub>H<sub>48</sub>O<sub>4</sub>Si<sub>5</sub> CAS:0-00-0 MolWeight:468 RetIndex:1495

CompName:1,3,5,7,9-Pentasiloxane, 1,1,3,3,5,5,7,7,9,9-decamethyl-1,9-di(tert.butyl)-

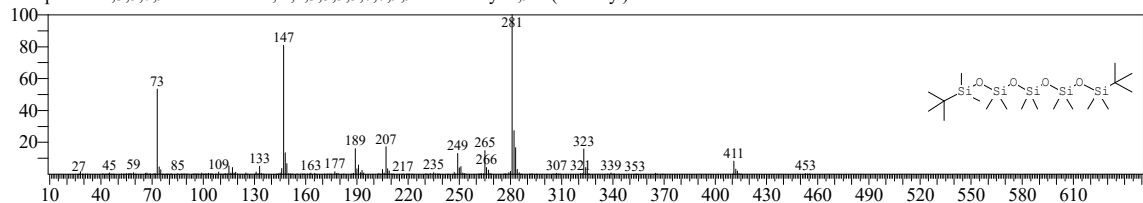

Hit#:4 Entry:249271 Library:NIST20M1.lib

SI:80 Formula:C<sub>12</sub>H<sub>36</sub>O<sub>4</sub>Si<sub>5</sub> CAS:38146-99-5 MolWeight:384 RetIndex:1068

CompName:1,1,1,3,5,5,7,7-Nonamethyl-3-(trimethylsiloxy)tetrasiloxane \$\$ 1,1,1,3,3,5,7,7-Nonamethyl-5-[(trimethylsilyl)oxy]tetrasiloxane #

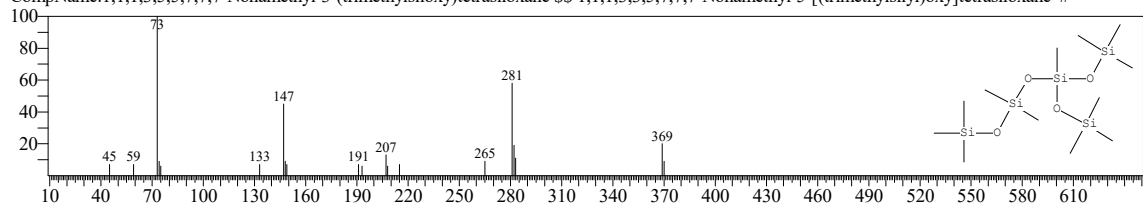

Hit#:5 Entry:158097 Library:NIST20M1.lib

SI:77 Formula:C<sub>14</sub>H<sub>24</sub>O<sub>3</sub>Si<sub>2</sub> CAS:0-00-0 MolWeight:296 RetIndex:1625

CompName:2,6-Dihydroxyacetophenone, 2TMS derivative \$\$ 2',6'-Dihydroxyacetophenone, bis(trimethylsilyl) ether

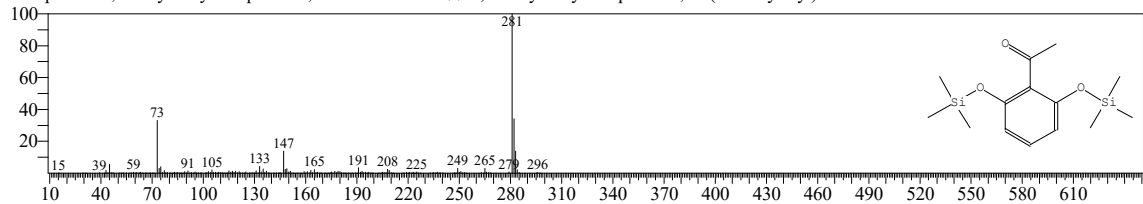

# TNAU

<< Target >>

Line#:4 R.Time:11.135(Scan#:1228) MassPeaks:338

RawMode:Averaged 11.130-11.140(1227-1229) BasePeak:69.05(3558)

BG Mode:Calc. from Peak Group 1 - Event 1 Q3 Scan

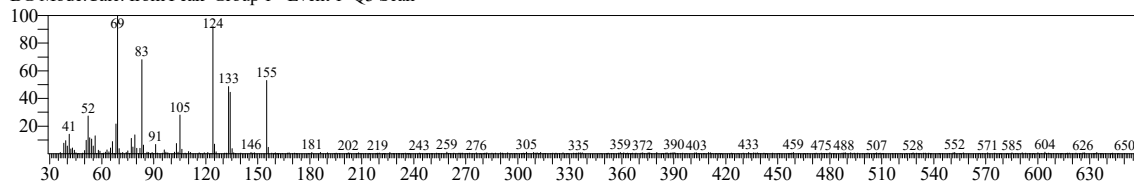

Hit#:1 Entry:9 Library:FA\_ME\_SP2560\_EI\_V3.lib

SI:42 Formula:C15H28O2 CAS:544-64-9 MolWeight:240 RetIndex:2283

CompName:Methyl myristoleate ; ; (Z)-tetradec-9-enoic acid

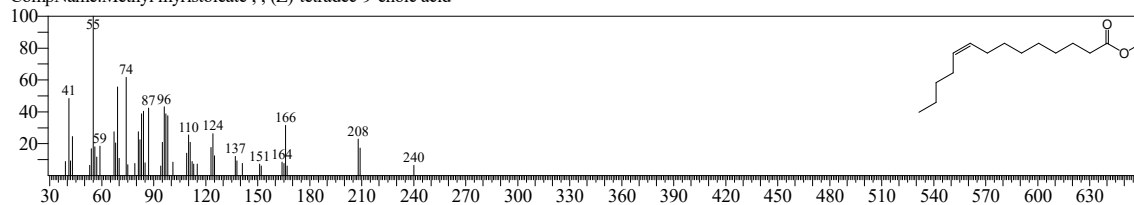

Hit#:2 Entry:24 Library:FA\_ME\_SP2560\_EI\_V3.lib

SI:41 Formula:C21H40O2 CAS:5561-99-9 MolWeight:324 RetIndex:2874

CompName:Methyl cis-11-icosenoate ; ; Icos-11-enoic acid

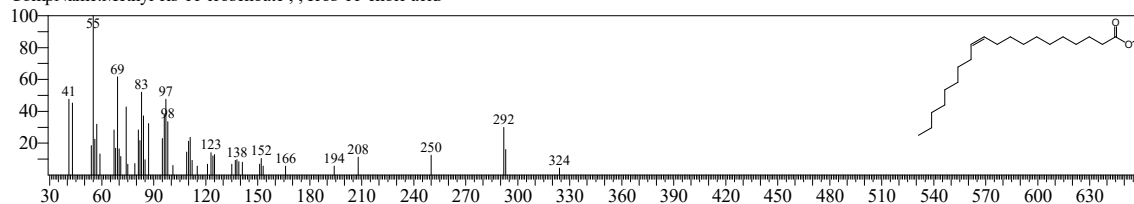

Hit#:3 Entry:13 Library:FA\_ME\_SP2560\_EI\_V3.lib

SI:41 Formula:C17H32O2 CAS:373-49-9 MolWeight:268 RetIndex:2478

CompName:Methyl palmitoleate ; Hexadec-9-enoic acid

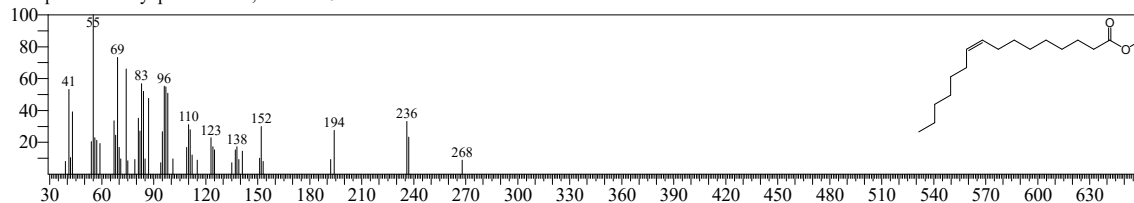

Hit#:4 Entry:11 Library:FA\_ME\_SP2560\_EI\_V3.lib

SI:41 Formula:C16H30O2 CAS:84743-29-3 MolWeight:254 RetIndex:2388

CompName:Methyl cis-10-pentadecenoate ; (Z)-pentadec-10-enoic acid

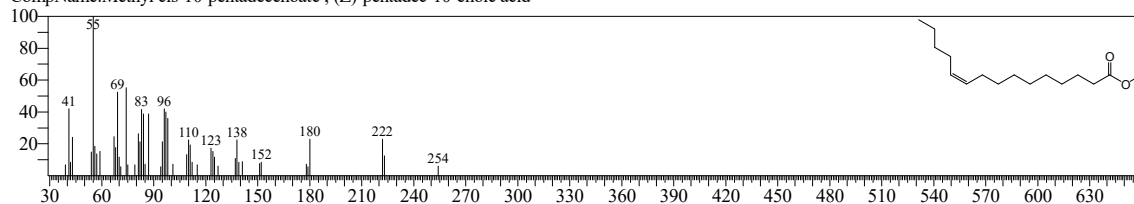

Hit#:5 Entry:15 Library:FA\_ME\_SP2560\_EI\_V3.lib

SI:40 Formula:C18H34O2 CAS:29743-97-3 MolWeight:282 RetIndex:2581

CompName:Methyl cis-10-heptadecenoate ; Heptadec-10-enoic acid

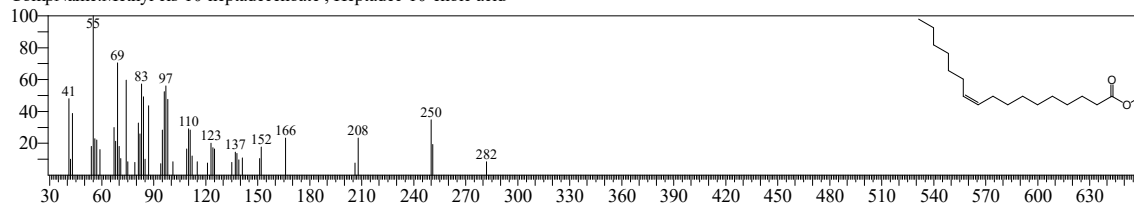

# TNAU

<< Target >>

Line#:5 R.Time:12.500(Scan#:1501) MassPeaks:389

RawMode:Averaged 12.495-12.505(1500-1502) BasePeak:138.05(80440)

BG Mode:Calc. from Peak Group 1 - Event 1 Q3 Scan

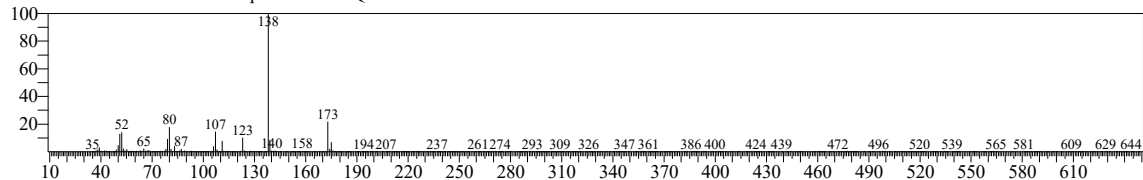

Hit#:1 Entry:8360 Library:NIST20R.lib

SI:73 Formula:C6H6N2O2 CAS:105-11-3 MolWeight:138 RetIndex:1349

CompName:2,5-Cyclohexadiene-1,4-dione, dioxime \$\$ p-Benzoquinone, dioxime \$\$ p-Quinone dioxime \$\$ p-Quinone oxime \$\$ Benzoquinone dioxime \$\$

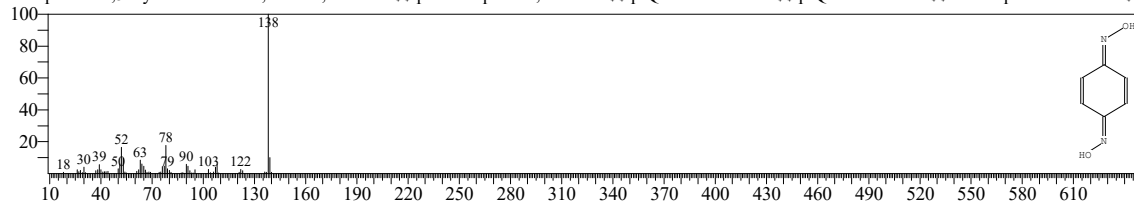

Hit#:2 Entry:25 Library:FA\_ME\_SP2560\_EI\_V3.lib

SI:34 Formula:C19H32O2 CAS:463-40-1 MolWeight:292 RetIndex:2892

CompName:Methyl linolenate ; (9Z,12Z,15Z)-octadeca-9,12,15-trienoic acid

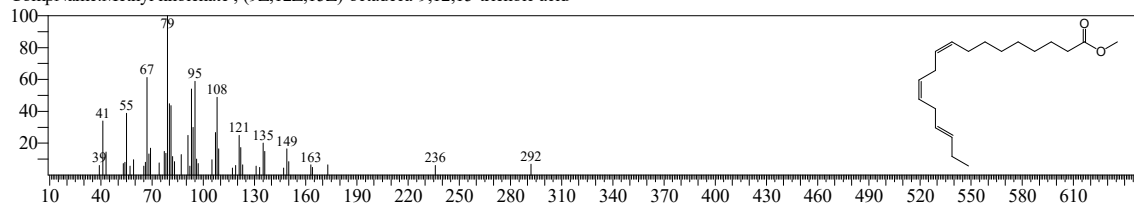

Hit#:3 Entry:21 Library:FA\_ME\_SP2560\_EI\_V3.lib

SI:33 Formula:C19H34O2 CAS:60-33-3 MolWeight:294 RetIndex:2775

CompName:Methyl linoleate ; Octadeca-9,12-dienoic acid

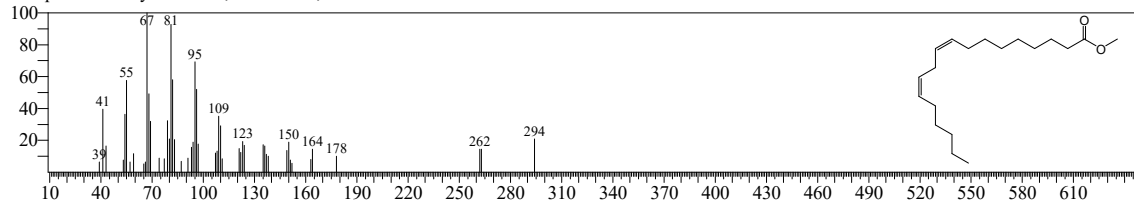

Hit#:4 Entry:34 Library:FA\_ME\_SP2560\_EI\_V3.lib

SI:33 Formula:C23H42O2 CAS:7370-49-2 MolWeight:350 RetIndex:3169

CompName:Methyl cis-13,16-Docosadienate ; (13Z,16E)-docosa-13,16-dienoic acid

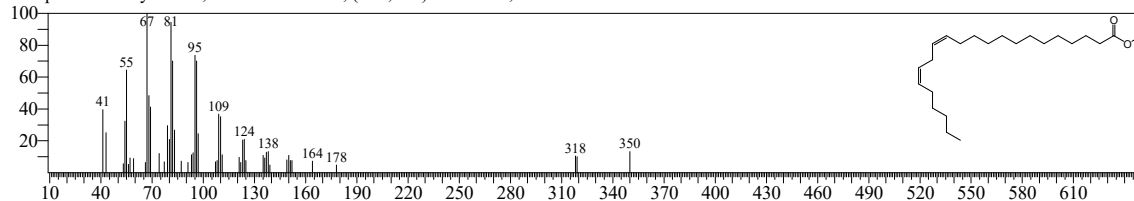

Hit#:5 Entry:137 Library:OA\_TMS\_DB5\_67min\_V3.lib

SI:33 Formula:C9H14N2OSi CAS:98-92-0 MolWeight:194 RetIndex:1486

CompName:Niacinamide-TMS ; pyridine-3-carboxamide

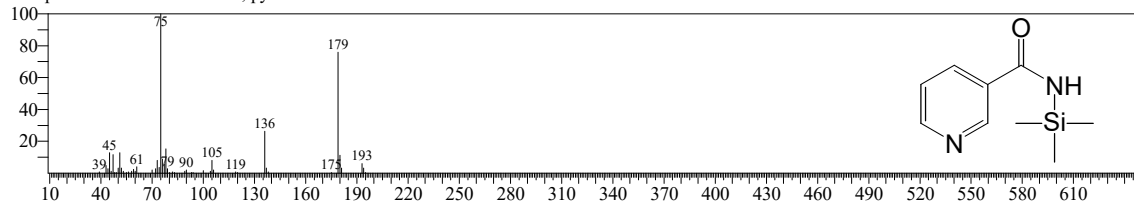

# TNAU

<< Target >>

Line#:6 R.Time:12.575(Scan#:1516) MassPeaks:309

RawMode:Averaged 12.570-12.580(1515-1517) BasePeak:56.00(35)

BG Mode:Calc. from Peak Group 1 - Event 1 Q3 Scan

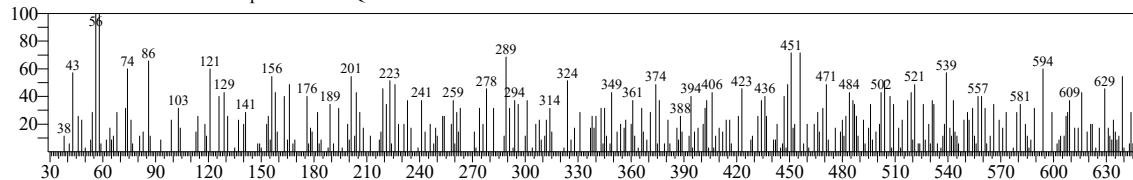

Hit#:1 Entry:1 Library:OA\_TMS\_DB5\_67min\_V3.lib

SI:14 Formula:C7H17NO2Si CAS:1118-68-9 MolWeight:175 RetIndex:990

CompName:Dimethylglycine-TMS ; 2-(dimethylamino)acetic acid

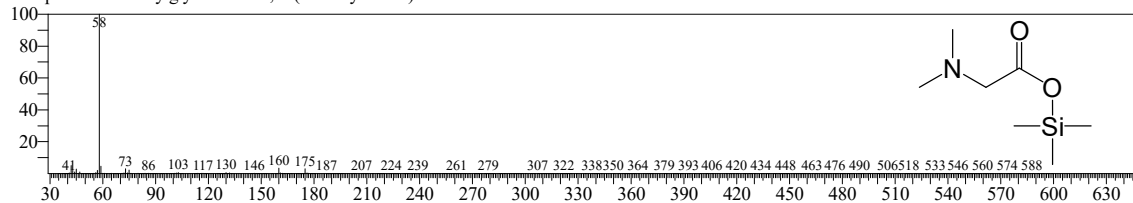

Hit#:2 Entry:4 Library:FA\_ME\_SP2560\_EI\_V3.lib

SI:14 Formula:C11H22O2 CAS:334-48-5 MolWeight:186 RetIndex:1767

CompName:Methyl caprate ; Decanoic acid

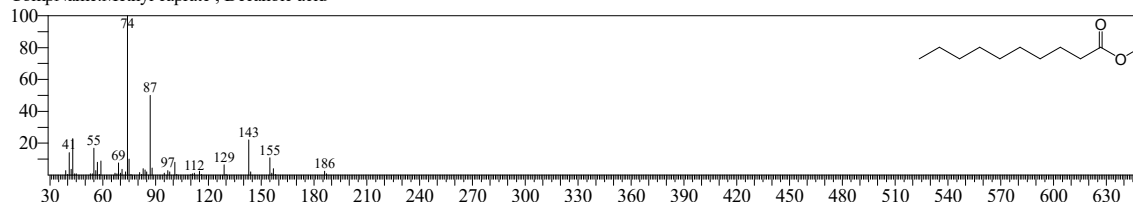

Hit#:3 Entry:160 Library:OA\_TMS\_DB5\_67min\_V3.lib

SI:13 Formula:C11H27NO2SSi2 CAS:63-68-3 MolWeight:293 RetIndex:1530

CompName:Methionine-2TMS ; (2S)-2-amino-4-methylsulfanylbutanoic acid

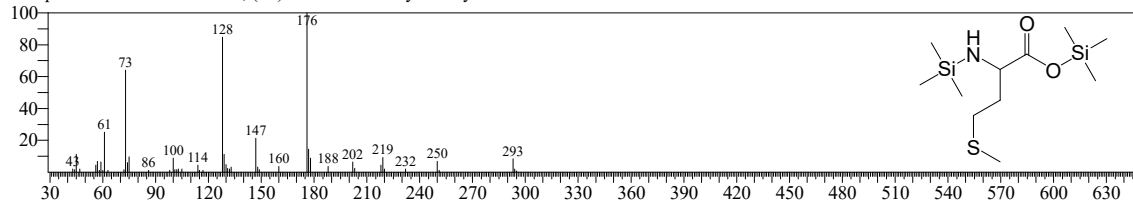

Hit#:4 Entry:409 Library:OA\_TMS\_DB5\_67min\_V3.lib

SI:13 Formula:C14H32N2O3Si2 CAS:692-04-6 MolWeight:332 RetIndex:1951

CompName:N6-Acetyllysine-2TMS ; (2S)-6-acetamido-2-aminohexanoic acid

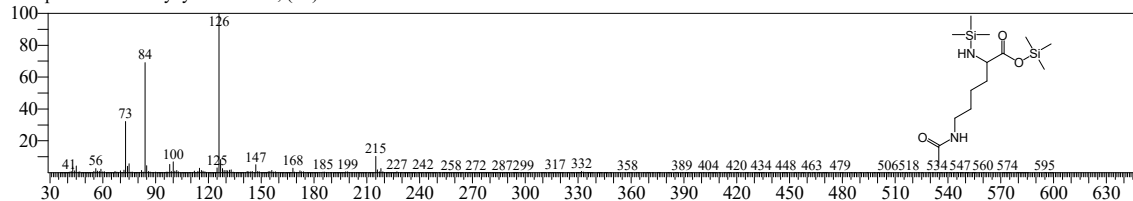

Hit#:5 Entry:2 Library:FA\_ME\_SP2560\_EI\_V3.lib

SI:13 Formula:C7H14O2 CAS:142-62-1 MolWeight:130 RetIndex:1332

CompName:Methyl caproate ; Hexanoic acid

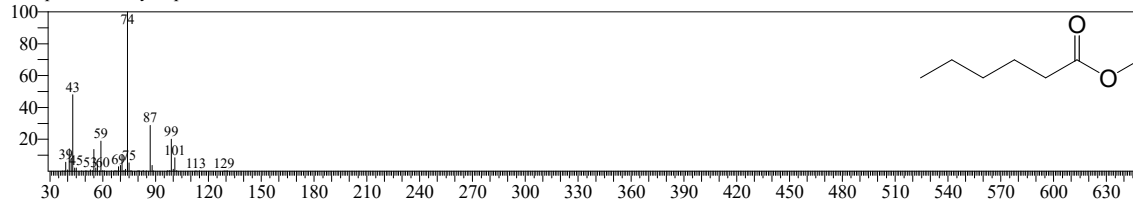

# TNAU

<< Target >>

Line#:7 R.Time:12.830(Scan#:1567) MassPeaks:345

RawMode:Averaged 12.825-12.835(1566-1568) BasePeak:138.05(116433)

BG Mode:Calc. from Peak Group 1 - Event 1 Q3 Scan

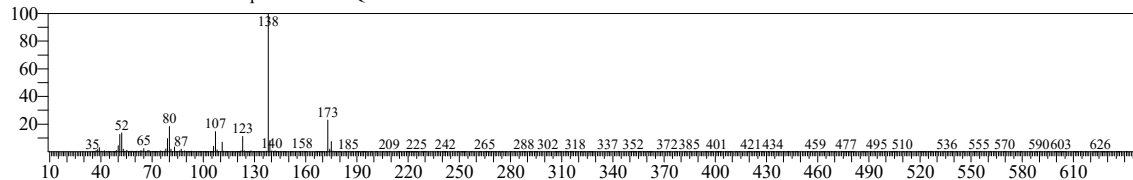

Hit#:1 Entry:11187 Library:NIST20M1.lib

SI:74 Formula:C7H6O3 CAS:533-31-3 MolWeight:138 RetIndex:1245

CompName:1,3-Benzodioxol-5-ol \$\$ Phenol, 3,4-(methylenedioxy)- \$\$ Sesamol \$\$ 3,4-(Methylenedioxy)phenol \$\$ 5-Hydroxy-1,3-benzodioxole \$\$ Methy

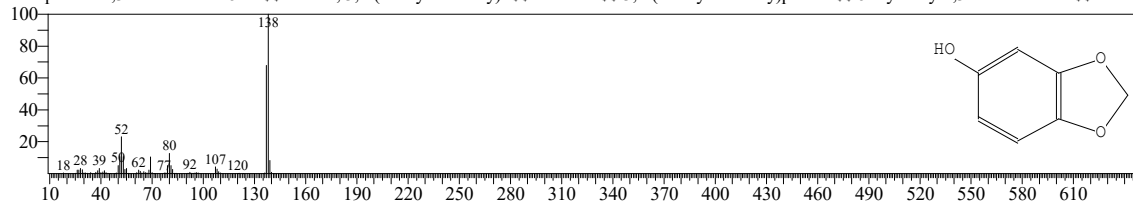

Hit#:2 Entry:8360 Library:NIST20R.lib

SI:73 Formula:C6H6N2O2 CAS:105-11-3 MolWeight:138 RetIndex:1349

CompName:2,5-Cyclohexadiene-1,4-dione, dioxime \$\$ p-Benzoquinone, dioxime \$\$ p-Quinone dioxime \$\$ p-Quinone oxime \$\$ Benzoquinone dioxime \$\$

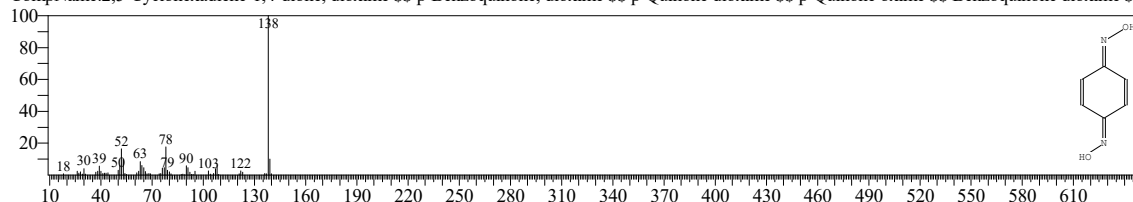

Hit#:3 Entry:11188 Library:NIST20M1.lib

SI:72 Formula:C7H6O3 CAS:69393-72-2 MolWeight:138 RetIndex:1245

CompName:2,3-Methylenedioxyphenol \$\$ 1,3-Benzodioxol-4-ol #

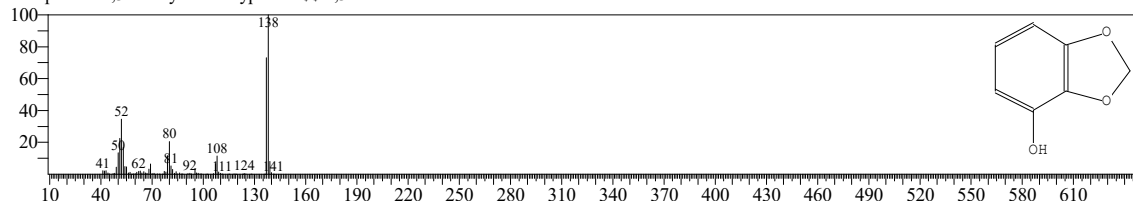

Hit#:4 Entry:8422 Library:NIST20R.lib

SI:72 Formula:C7H10N2O CAS:25680-58-4 MolWeight:138 RetIndex:1070

CompName:2-Ethyl-3-methoxypyrazine \$\$ 2-Methoxy-3-ethylpyrazine \$\$ Pyrazine, 2-ethyl-3-methoxy- \$\$ 3-Ethyl-2-methoxypyrazine \$\$ Pyrazine, 3-ethyl-

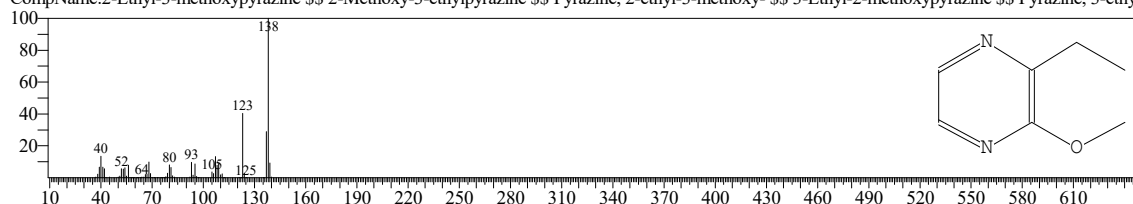

Hit#:5 Entry:11222 Library:NIST20M1.lib

SI:71 Formula:C7H10N2O CAS:3471-32-7 MolWeight:138 RetIndex:1325

CompName:Hydrazine, (4-methoxyphenyl)- \$\$ (p-Methoxyphenyl)hydrazine \$\$ 1-(4-Methoxyphenyl)hydrazine #

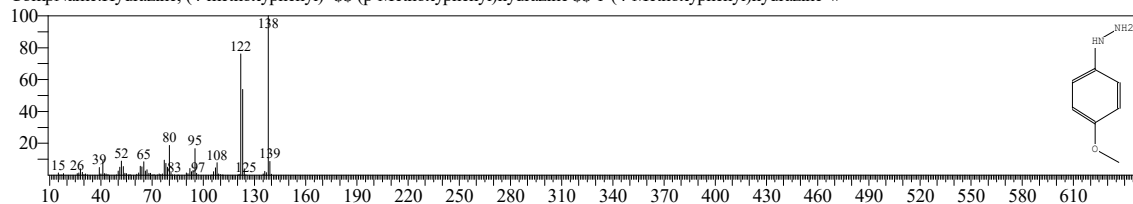



# TNAU

<< Target >>

Line#:8 R.Time:13.380(Scan#:1677) MassPeaks:329

RawMode:Averaged 13.375-13.385(1676-1678) BasePeak:155.05(87513)

BG Mode:Calc. from Peak Group 1 - Event 1 Q3 Scan

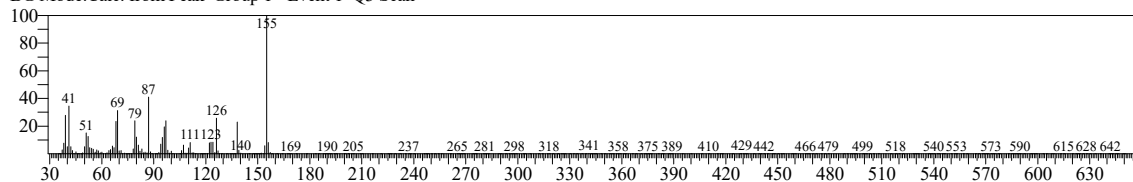

Hit#:1 Entry:34 Library:FA\_ME\_SP2560\_EI\_V3.lib

SI:53 Formula:C23H42O2 CAS:7370-49-2 MolWeight:350 RetIndex:3169

CompName:Methyl cis-13,16-Docosadienate ; (13Z,16E)-docosa-13,16-dienoic acid

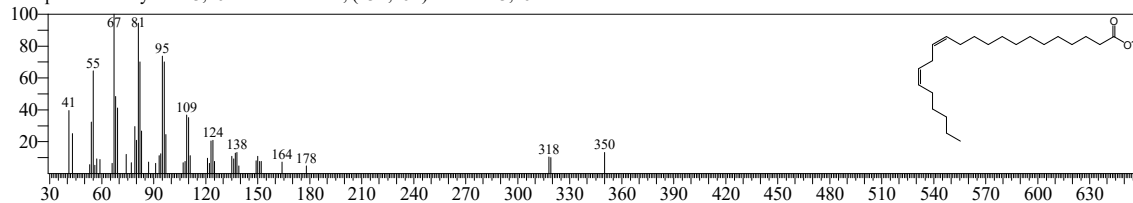

Hit#:2 Entry:21 Library:FA\_ME\_SP2560\_EI\_V3.lib

SI:52 Formula:C19H34O2 CAS:60-33-3 MolWeight:294 RetIndex:2775

CompName:Methyl linoleate ; Octadeca-9,12-dienoic acid

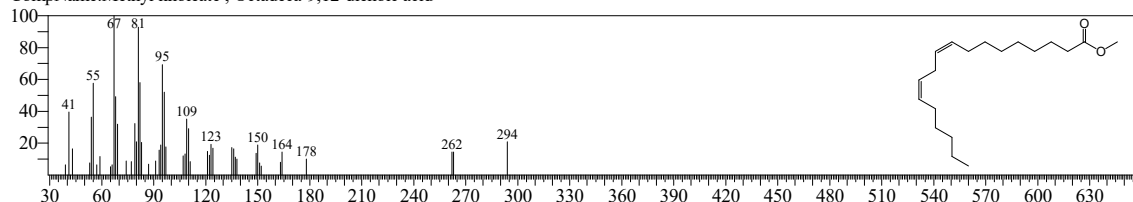

Hit#:3 Entry:20 Library:FA\_ME\_SP2560\_EI\_V3.lib

SI:52 Formula:C19H34O2 CAS:506-21-8 MolWeight:294 RetIndex:2727

CompName:Methyl linolelaidate ; (9E,12E)-octadeca-9,12-dienoic acid

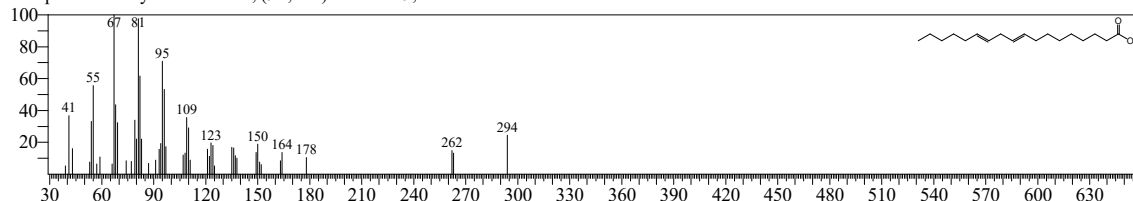

Hit#:4 Entry:11 Library:FA\_ME\_SP2560\_EI\_V3.lib

SI:52 Formula:C16H30O2 CAS:84743-29-3 MolWeight:254 RetIndex:2388

CompName:Methyl cis-10-pentadecenoate ; (Z)-pentadec-10-enoic acid

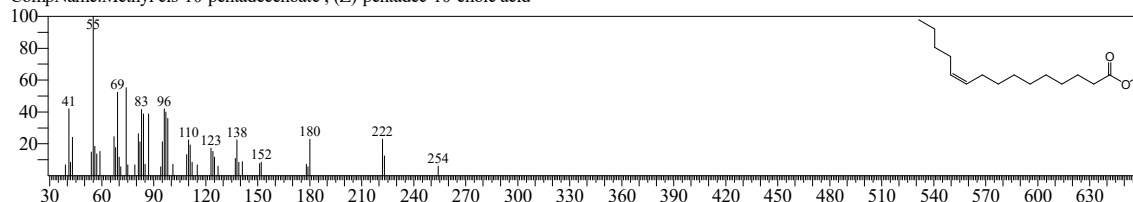

Hit#:5 Entry:27 Library:FA\_ME\_SP2560\_EI\_V3.lib

SI:51 Formula:C21H38O2 CAS:2091-39-6 MolWeight:322 RetIndex:2973

CompName:Methyl cis-11,14-Icosadienoate ; ; Icosa-11,14-dienoic acid

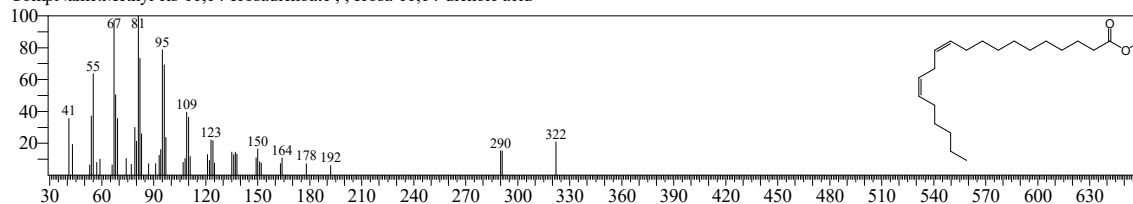

# TNAU

<< Target >>

Line#:9 R.Time:13.575(Scan#:1716) MassPeaks:373

RawMode:Averaged 13.570-13.580(1715-1717) BasePeak:155.05(85854)

BG Mode:Calc. from Peak Group 1 - Event 1 Q3 Scan

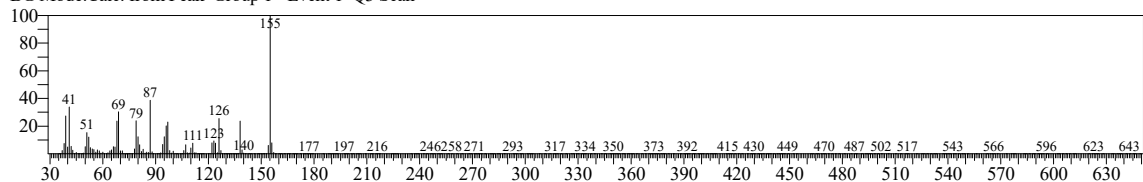

Hit#:1 Entry:34 Library:FA\_ME\_SP2560\_EI\_V3.lib

SI:53 Formula:C23H42O2 CAS:7370-49-2 MolWeight:350 RetIndex:3169

CompName:Methyl cis-13,16-Docosadienate ; (13Z,16E)-docosa-13,16-dienoic acid

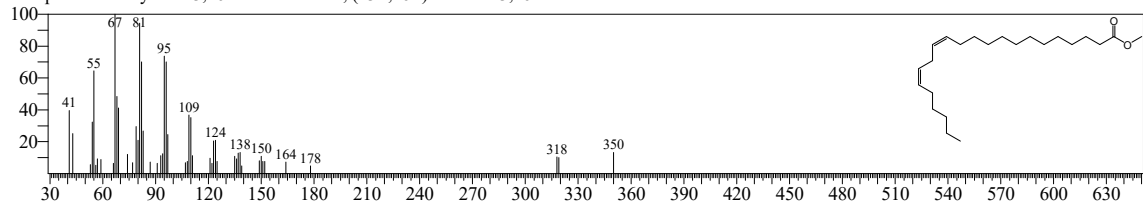

Hit#:2 Entry:21 Library:FA\_ME\_SP2560\_EI\_V3.lib

SI:52 Formula:C19H34O2 CAS:60-33-3 MolWeight:294 RetIndex:2775

CompName:Methyl linoleate ; Octadeca-9,12-dienoic acid

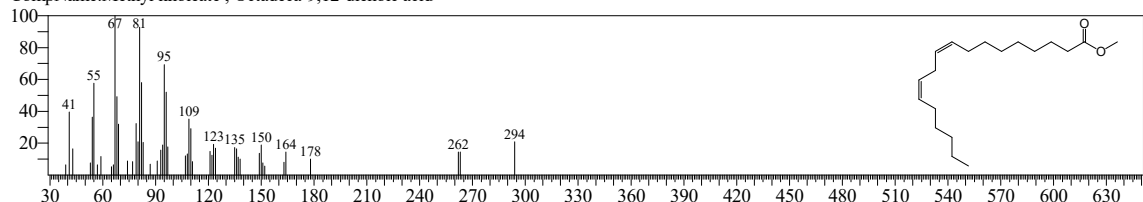

Hit#:3 Entry:20 Library:FA\_ME\_SP2560\_EI\_V3.lib

SI:52 Formula:C19H34O2 CAS:506-21-8 MolWeight:294 RetIndex:2727

CompName:Methyl linolelaidate ; (9E,12E)-octadeca-9,12-dienoic acid

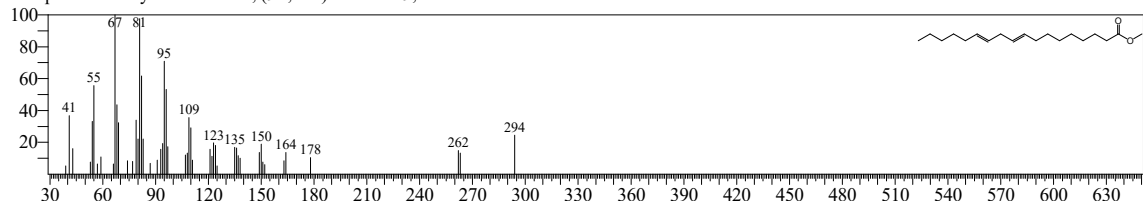

Hit#:4 Entry:11 Library:FA\_ME\_SP2560\_EI\_V3.lib

SI:51 Formula:C16H30O2 CAS:84743-29-3 MolWeight:254 RetIndex:2388

CompName:Methyl cis-10-pentadecenoate ; (Z)-pentadec-10-enoic acid

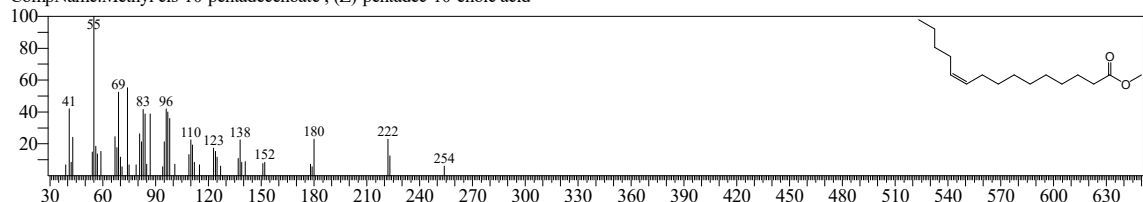

Hit#:5 Entry:27 Library:FA\_ME\_SP2560\_EI\_V3.lib

SI:51 Formula:C21H38O2 CAS:2091-39-6 MolWeight:322 RetIndex:2973

CompName:Methyl cis-11,14-Icosadienoate ; ; Icosa-11,14-dienoic acid

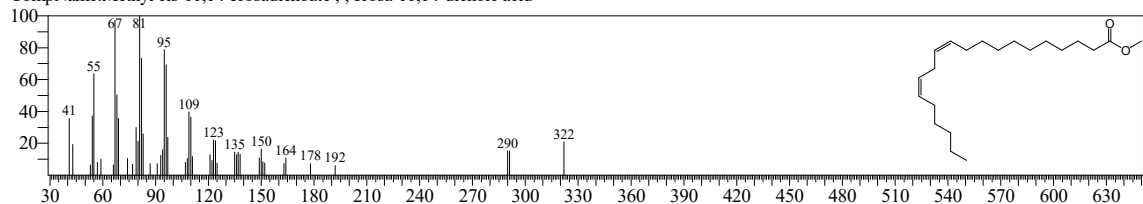

# TNAU

<< Target >>

Line#:10 R.Time:14.470(Scan#:1895) MassPeaks:357

RawMode:Averaged 14.465-14.475(1894-1896) BasePeak:163.10(1680)

BG Mode:Calc. from Peak Group 1 - Event 1 Q3 Scan

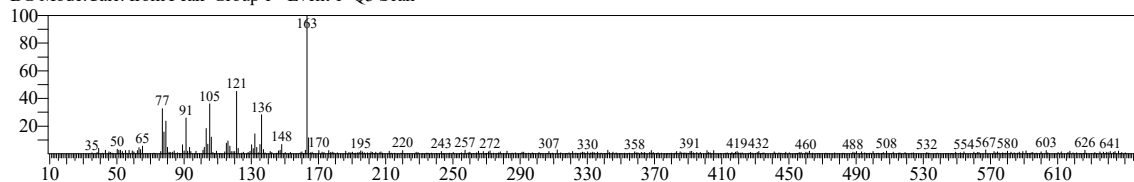

Hit#:1 Entry:57597 Library:NIST20M1.lib

SI:75 Formula:C10H11N3S CAS:39181-45-8 MolWeight:205 RetIndex:1890

CompName:5-(4-Methylbenzyl)-1,3,4-thiadiazol-2-amine \$\$ 1,3,4-Thiadiazol-2-amine, 5-[(4-methylphenyl)methyl]-

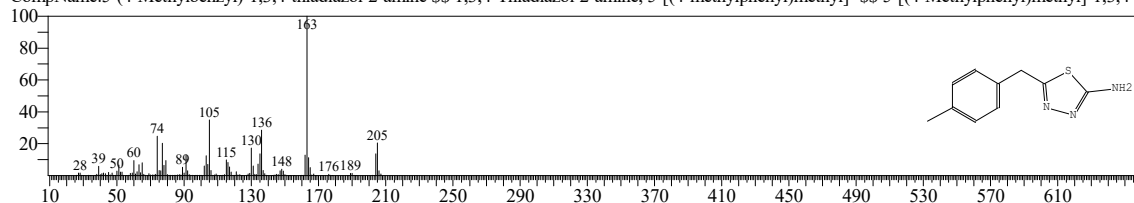

Hit#:2 Entry:14259 Library:NIST20R.lib

SI:74 Formula:C9H9NS CAS:40046-30-8 MolWeight:163 RetIndex:0

CompName:3,5-Dimethylphenyl isothiocyanate \$\$ 1-Isothiocyanato-3,5-dimethylbenzene #

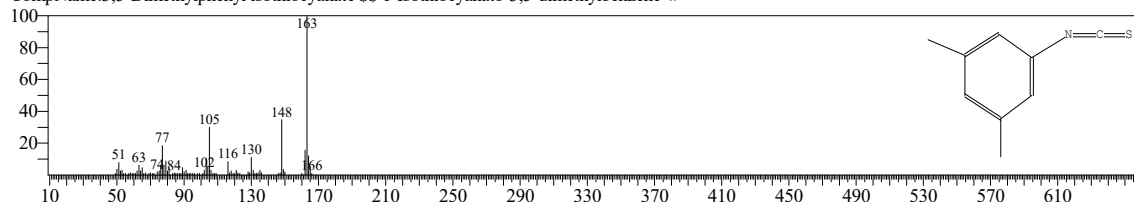

Hit#:3 Entry:14264 Library:NIST20R.lib

SI:73 Formula:C9H9NS CAS:1539-20-4 MolWeight:163 RetIndex:0

CompName:2,3-Dimethylphenylisothiocyanate \$\$ 1-Isothiocyanato-2,3-dimethylbenzene #

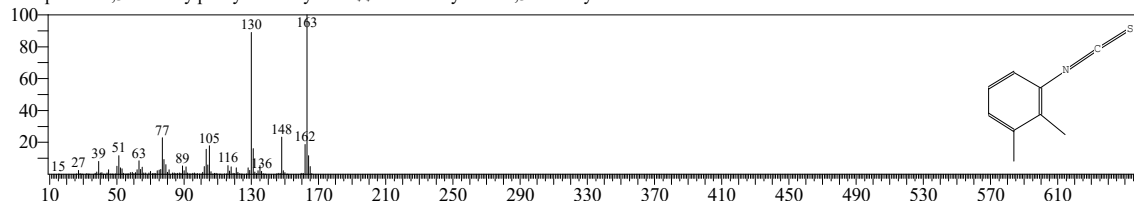

Hit#:4 Entry:176186 Library:NIST20M1.lib

SI:73 Formula:C17H17N3O3 CAS:0-00-0 MolWeight:311 RetIndex:3129

CompName:Oxalic acid, monoamide monohydrazide, N-(2,4-dimethylphenyl)-N''-salicylideno-

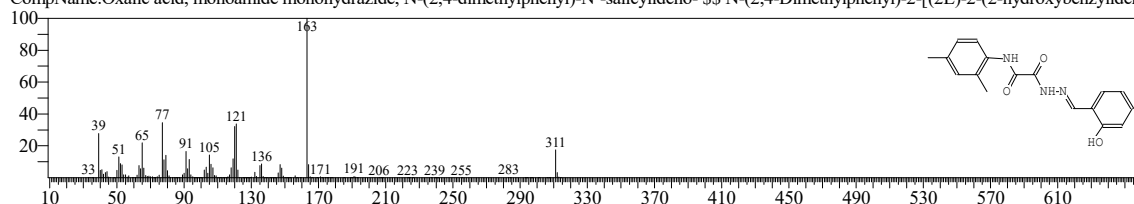

Hit#:5 Entry:25351 Library:NIST20M1.lib

SI:72 Formula:C10H12O2 CAS:38998-17-3 MolWeight:164 RetIndex:1398

CompName:2,3-Dimethyl-para-anisaldehyde \$\$ Benzaldehyde, 4-methoxy-2,3-dimethyl-

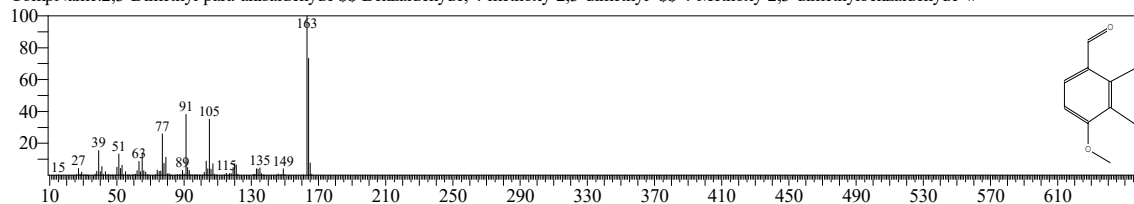

# TNAU

<< Target >>

Line#:11 R.Time:18.125(Scan#:2626) MassPeaks:342

RawMode:Averaged 18.120-18.130(2625-2627) BasePeak:60.00(7814)

BG Mode:Calc. from Peak Group 1 - Event 1 Q3 Scan

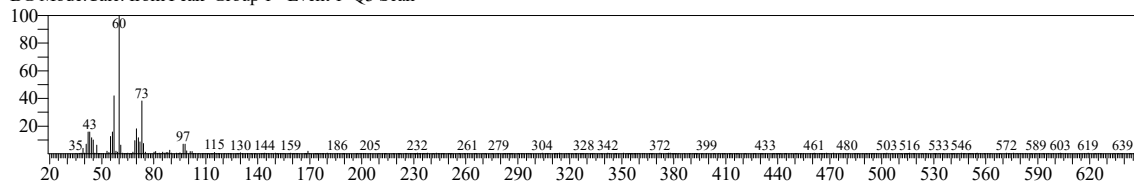

Hit#:1 Entry:36240 Library:NIST20M1.lib

SI:94 Formula:C6H12O6 CAS:2595-97-3 MolWeight:180 RetIndex:1698

CompName:D-Allose \$\$ .beta.-D-Allose \$\$ Hexose #

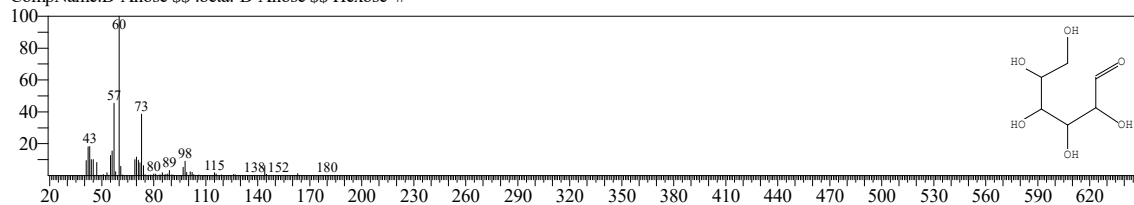

Hit#:2 Entry:13905 Library:NIST20R.lib

SI:94 Formula:C6H10O5 CAS:498-07-7 MolWeight:162 RetIndex:1404

CompName:.beta.-D-Glucopyranose, 1,6-anhydro- \$\$ Anhydro-d-mannosan \$\$ Levoglucosan \$\$ 1,6-Anhydro-.beta.-D-glucopyranose \$\$ 1,6-Anhydro-beta-

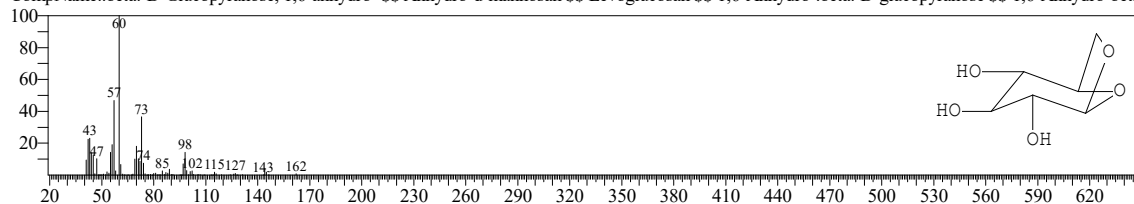

Hit#:3 Entry:23812 Library:NIST20M1.lib

SI:92 Formula:C6H10O5 CAS:0-00-0 MolWeight:162 RetIndex:1404

CompName:1,6-Anhydro-.beta.-d-talopyranose

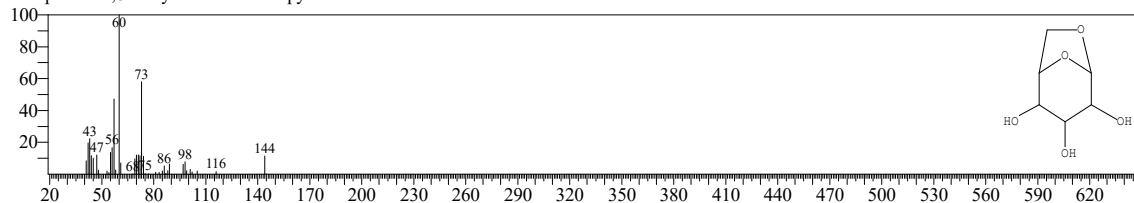

Hit#:4 Entry:23808 Library:NIST20M1.lib

SI:88 Formula:C6H10O5 CAS:0-00-0 MolWeight:162 RetIndex:1400

CompName:3,4-Altrosan \$\$ 3,4-Anhydrohexopyranose #

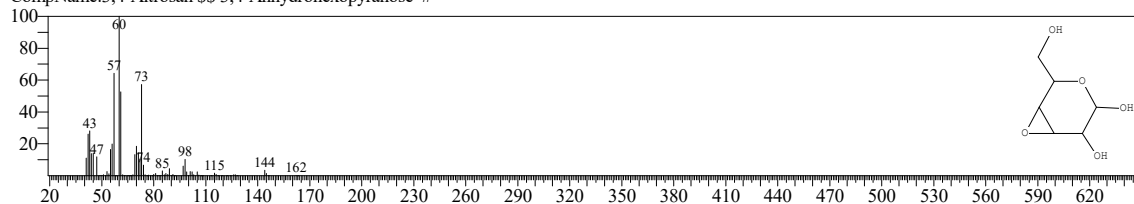

Hit#:5 Entry:21209 Library:NIST20R.lib

SI:85 Formula:C7H14O6 CAS:97-30-3 MolWeight:194 RetIndex:1714

CompName:.alpha.-D-Glucopyranoside, methyl \$\$ Glucopyranoside, methyl, .alpha.-D- \$\$ .alpha.-Methylglucoside \$\$ Methyl .alpha.-D-glucopyranoside \$\$

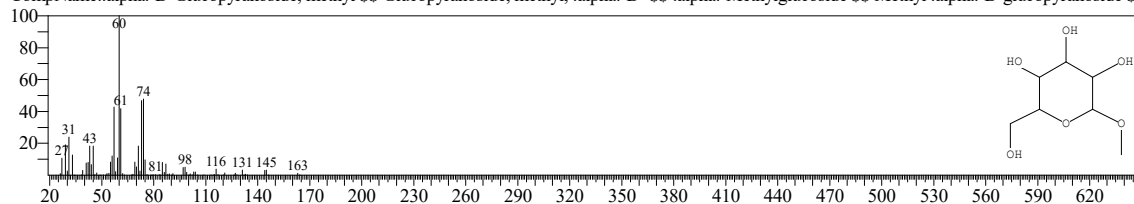

# TNAU

<< Target >>

Line#:12 R.Time:19.190(Scan#:2839) MassPeaks:365

RawMode:Averaged 19.185-19.195(2838-2840) BasePeak:263.15(4479)

BG Mode:Calc. from Peak Group 1 - Event 1 Q3 Scan

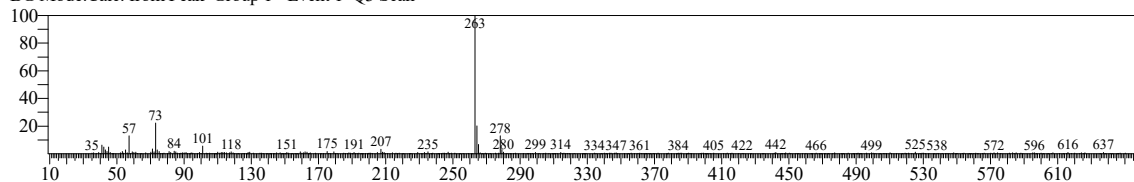

Hit#:1 Entry:137399 Library:NIST20M1.lib

SI:84 Formula:C17H30OSi CAS:53925-65-8 MolWeight:278 RetIndex:1632

CompName:2,4-Di-tert-butylphenoxytrimethylsilane \$\$ Benzene, 2,4-bis(1,1-dimethylethyl)-1-[(trimethylsilyl)oxy]- \$\$ Silane, [2,4-bis(1,1-dimethylethyl)ph

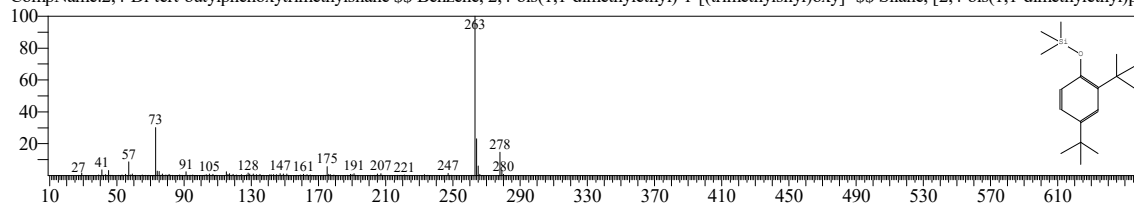

Hit#:2 Entry:136557 Library:NIST20M1.lib

SI:78 Formula:C12H22N4Si2 CAS:0-00-0 MolWeight:278 RetIndex:1703

CompName:3-Deazaadenine, 2TMS \$\$ 3-Deazaadenine, N,N'-bis-TMS \$\$ 1H-Imidazo[4,5-c]pyridin-4-amine, N,N'-bis-TMS

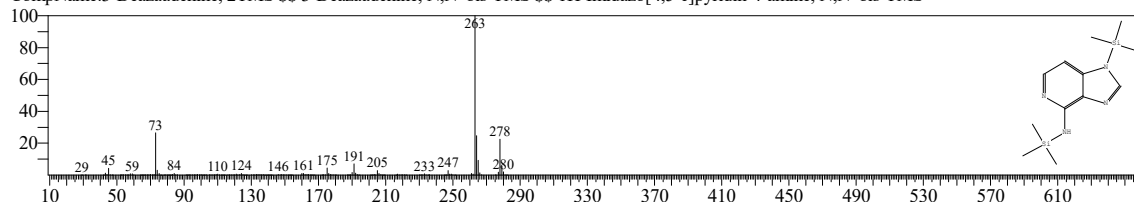

Hit#:3 Entry:33871 Library:NIST20R.lib

SI:77 Formula:C17H30OSi CAS:10416-73-6 MolWeight:278 RetIndex:1632

CompName:2,6-Bis(tert-butyl)phenol, TMS derivative \$\$ Trimethyl(2,6 di-tert-butylphenoxy)silane \$\$ (2,6-Di-tert-butylphenoxy)(trimethyl)silane #

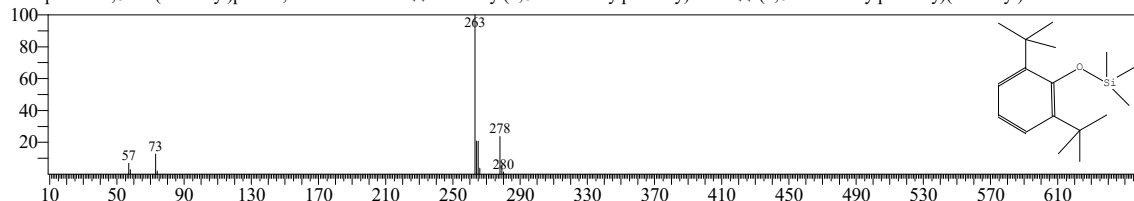

Hit#:4 Entry:137020 Library:NIST20M1.lib

SI:75 Formula:C15H22O3Si CAS:0-00-0 MolWeight:278 RetIndex:1736

CompName:6-Methoxy-2,2-dimethyl-2,3-dihydro-4H-chromen-4-one, TMS \$\$ 6-Methoxy-2,2-dimethyl-chroman-4-one, O-trimethylsilyl- \$\$ 4H-1-Benzopy

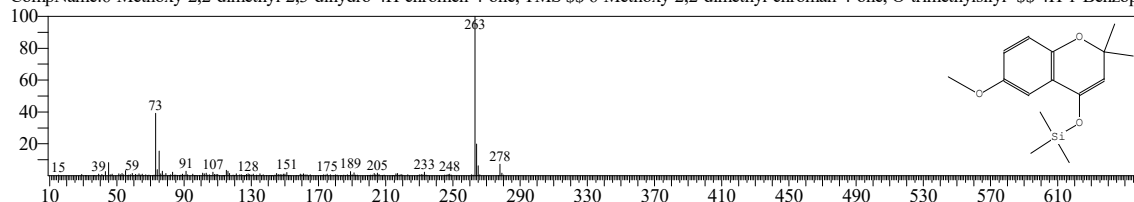

Hit#:5 Entry:136556 Library:NIST20M1.lib

SI:75 Formula:C12H22N4Si2 CAS:0-00-0 MolWeight:278 RetIndex:1606

CompName:1H,1'H-2,2'-Biimidazole, 2TMS \$\$ 1H,1'H-2,2'-Biimidazole, N,N'-bis-TMS \$\$ 1H,1'H-[2,2']Biimidazolyl, 2TMS \$\$ 2,2'-Bi-1H-imidazole, 2TMS

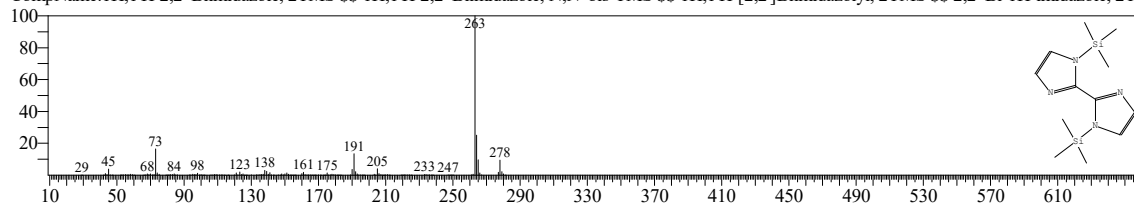

# TNAU

<< Target >>

Line#:13 R.Time:28.300(Scan#:4661) MassPeaks:286

RawMode:Averaged 28.295-28.305(4660-4662) BasePeak:73.05(7874)

BG Mode:Calc. from Peak Group 1 - Event 1 Q3 Scan

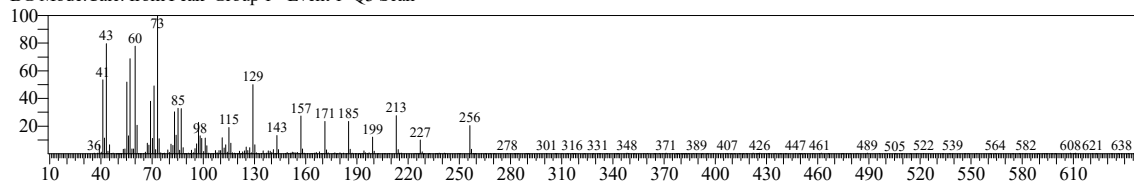

Hit#:1 Entry:31600 Library:NIST20R.lib

SI:95 Formula:C16H32O2 CAS:57-10-3 MolWeight:256 RetIndex:1968

CompName:n-Hexadecanoic acid \$ Hexadecanoic acid \$ n-Hexadecic acid \$ Palmitic acid \$ Pentadecanecarboxylic acid \$ 1-Pentadecanecarboxylic

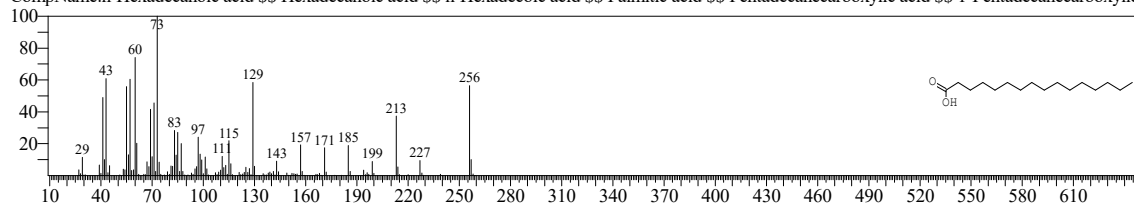

Hit#:2 Entry:29890 Library:NIST20R.lib

SI:92 Formula:C15H30O2 CAS:1002-84-2 MolWeight:242 RetIndex:1869

CompName:Pentadecanoic acid \$ Pentadecylic acid \$ n-Pentadecanoic acid \$ n-Pentadecylic acid

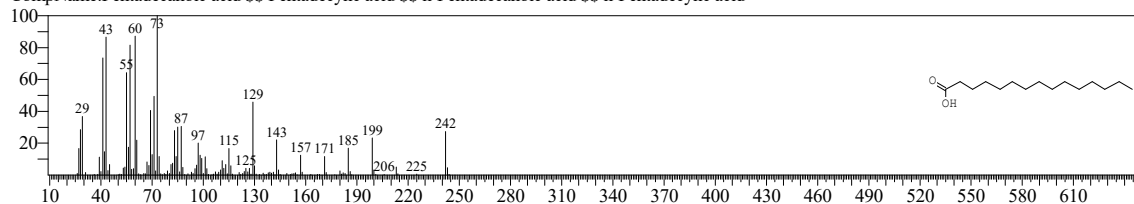

Hit#:3 Entry:44286 Library:NIST20M2.lib

SI:91 Formula:C38H68O8 CAS:28474-90-0 MolWeight:652 RetIndex:4765

CompName:l-(+)-Ascorbic acid 2,6-dihexadecanoate

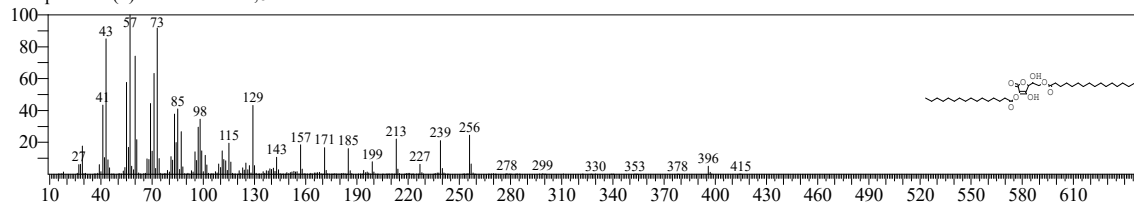

Hit#:4 Entry:144781 Library:NIST20M1.lib

SI:90 Formula:C18H36O2 CAS:57-11-4 MolWeight:284 RetIndex:2167

CompName:Octadecanoic acid \$ Stearic acid \$ n-Octadecanoic acid \$ Humko Industriene R \$ Hydrofol Acid 150 \$ Hystrene S-97 \$ Hystrene T-70 \$

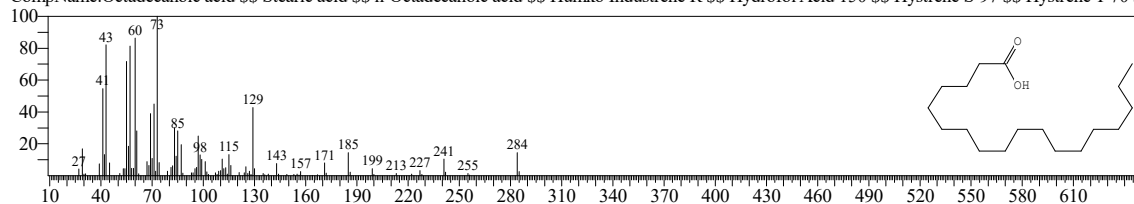

Hit#:5 Entry:81713 Library:NIST20M1.lib

SI:90 Formula:C14H28O2 CAS:544-63-8 MolWeight:228 RetIndex:1769

CompName:Tetradecanoic acid \$ Myristic acid \$ n-Tetradecanoic acid \$ n-Tetradecic acid \$ Neo-Fat 14 \$ Univol U 316S \$ 1-Tridecanecarboxylic \$

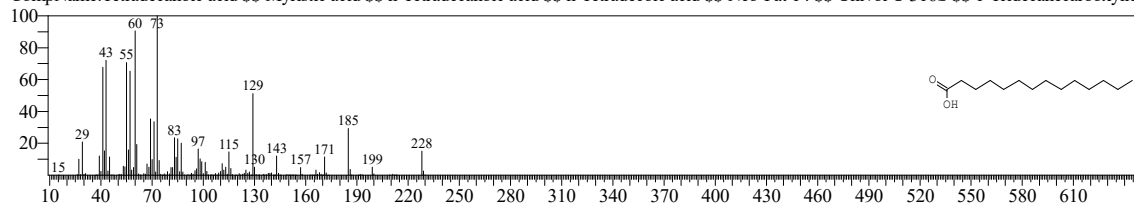

# TNAU

<< Target >>

Line#:14 R.Time:31.480(Scan#:5297) MassPeaks:428

RawMode:Averaged 31.475-31.485(5296-5298) BasePeak:67.05(5758)

BG Mode:Calc. from Peak Group 1 - Event 1 Q3 Scan

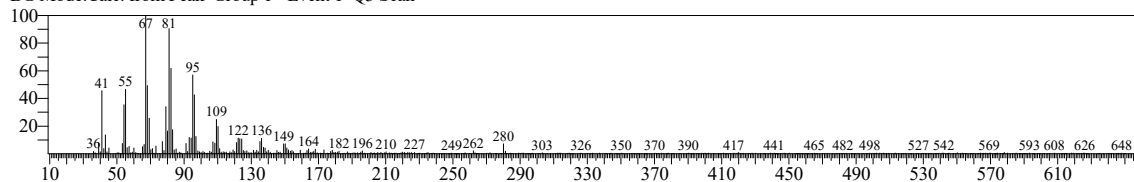

Hit#:1 Entry:139646 Library:NIST20M1.lib

SI:95 Formula:C18H32O2 CAS:2420-56-6 MolWeight:280 RetIndex:2183

CompName:10E,12Z-Octadecadienoic acid

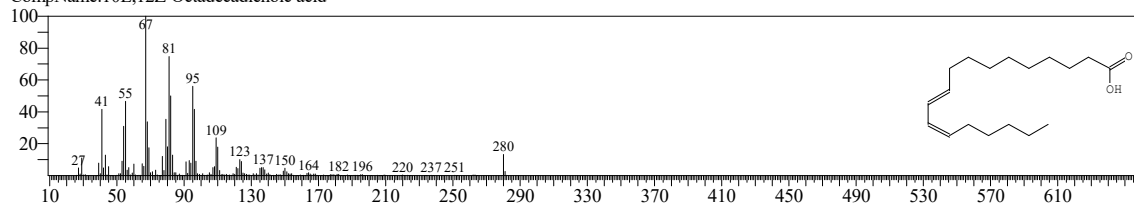

Hit#:2 Entry:34035 Library:NIST20R.lib

SI:95 Formula:C18H32O2 CAS:60-33-3 MolWeight:280 RetIndex:2183

CompName:9,12-Octadecadienoic acid (Z,Z)- \$\$ cis-9,cis-12-Octadecadienoic acid \$\$ cis,cis-Linoleic acid \$\$ Grape seed oil \$\$ Linoleic \$\$ Linoleic acid \$

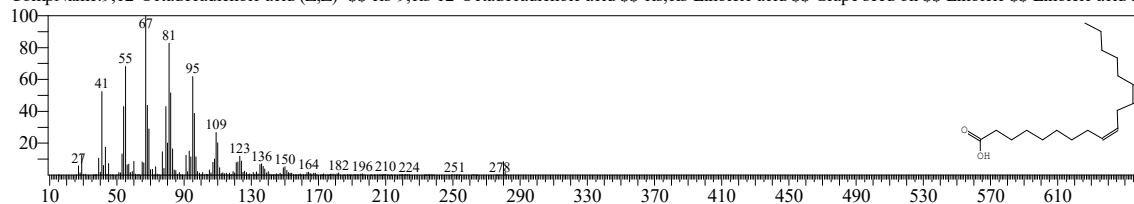

Hit#:3 Entry:139651 Library:NIST20M1.lib

SI:95 Formula:C18H32O2 CAS:544-71-8 MolWeight:280 RetIndex:2183

CompName:(9E,11E)-Octadecadienoic acid

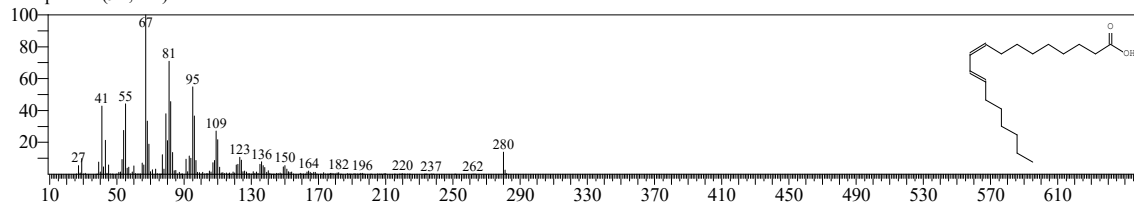

Hit#:4 Entry:139661 Library:NIST20M1.lib

SI:94 Formula:C18H32O2 CAS:506-21-8 MolWeight:280 RetIndex:2183

CompName:Linoelaidic acid

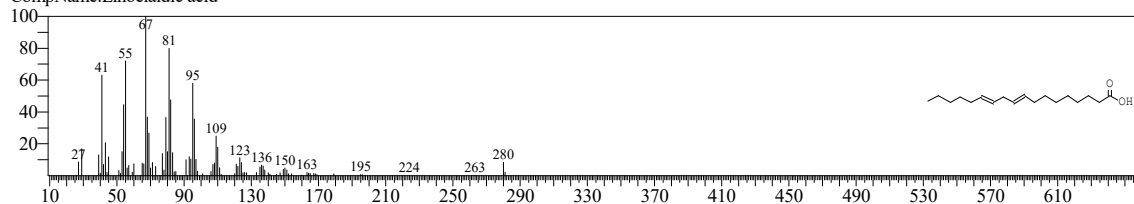

Hit#:5 Entry:173215 Library:NIST20M1.lib

SI:93 Formula:C20H36O2 CAS:2091-39-6 MolWeight:308 RetIndex:2382

CompName:11,14-Eicosadienoic acid

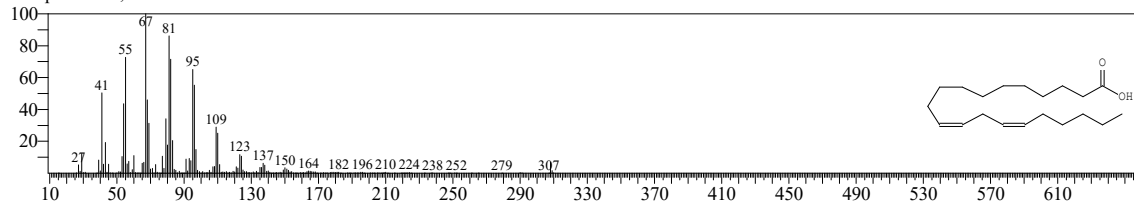

# TNAU

<< Target >>

Line#:15 R.Time:31.585(Scan#:5318) MassPeaks:373

RawMode:Averaged 31.580-31.590(5317-5319) BasePeak:55.10(2679)

BG Mode:Calc. from Peak Group 1 - Event 1 Q3 Scan

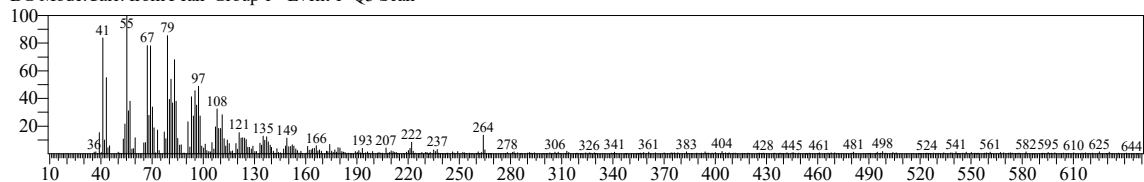

Hit#:1 Entry:92244 Library:NIST20M1.lib

SI:88 Formula:C16H30O CAS:56219-04-6 MolWeight:238 RetIndex:1808

CompName:cis-9-Hexadecenal \$ 9-Hexadecenal, (Z)- \$ (Z)-9-Hexadecenal \$ Z-9-Hexadecenal \$ (9Z)-9-Hexadecenal #

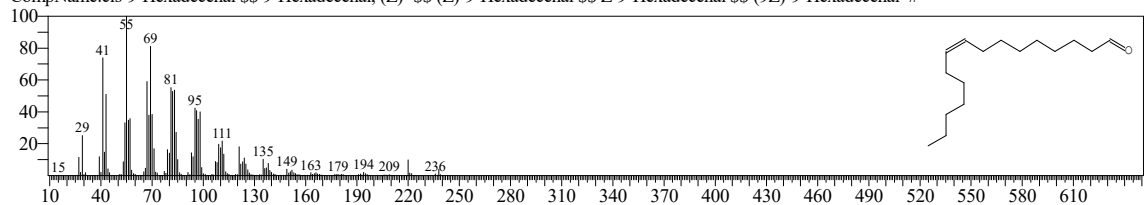

Hit#:2 Entry:156549 Library:NIST20M1.lib

SI:88 Formula:C19H34O2 CAS:0-00-0 MolWeight:294 RetIndex:2241

CompName:E,E,Z-1,3,12-Nonadecatriene-5,14-diol \$ (3E,12Z)-1,3,12-Nonadecatriene-5,14-diol #

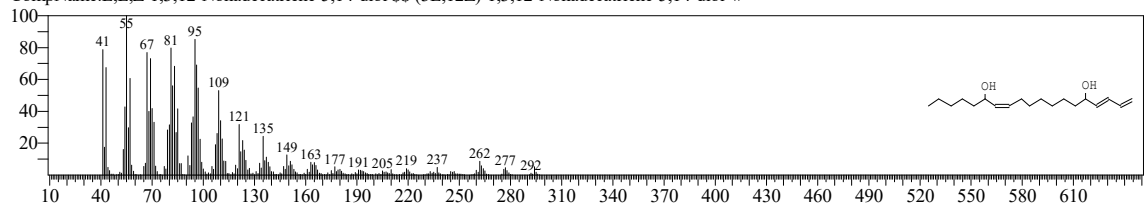

Hit#:3 Entry:123421 Library:NIST20M1.lib

SI:87 Formula:C18H34O CAS:2423-10-1 MolWeight:266 RetIndex:2007

CompName:9-Octadecenal, (Z)- \$ Olealdehyde \$ cis-9-Octadecenal \$ Oleylaldehyde \$ Z-9-Octadecenal \$ (9Z)-9-Octadecenal #

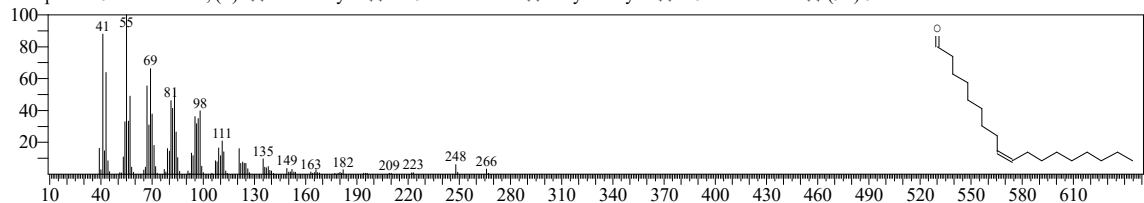

Hit#:4 Entry:92227 Library:NIST20M1.lib

SI:87 Formula:C16H30O CAS:56797-40-1 MolWeight:238 RetIndex:1808

CompName:7-Hexadecenal, (Z)- \$ (Z)-7-Hexadecenal \$ Z-7-Hexadecenal \$ (7Z)-7-Hexadecenal #

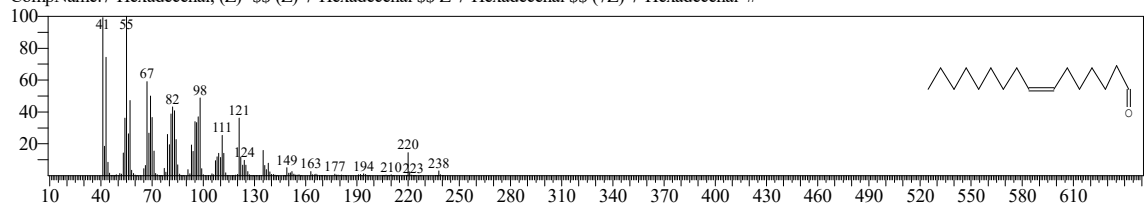

Hit#:5 Entry:63176 Library:NIST20M1.lib

SI:87 Formula:C14H26O CAS:65128-96-3 MolWeight:210 RetIndex:1609

CompName:7-Tetradecenal, (Z)- \$ Z-7-Tetradecenal \$ (7Z)-7-Tetradecenal #

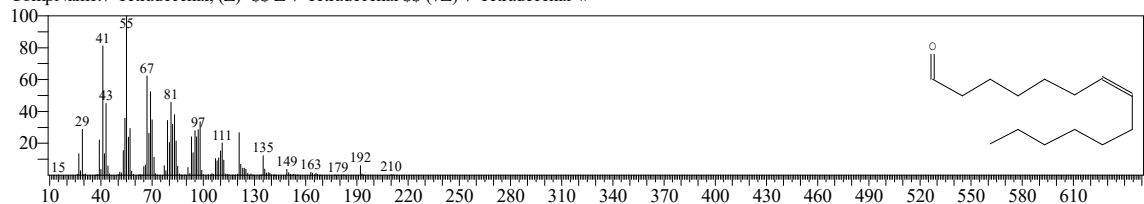



# TNAU

<< Target >>

Line#:16 R.Time:32.030(Scan#:5407) MassPeaks:346

RawMode:Averaged 32.025-32.035(5406-5408) BasePeak:73.05(1458)

BG Mode:Calc. from Peak Group 1 - Event 1 Q3 Scan

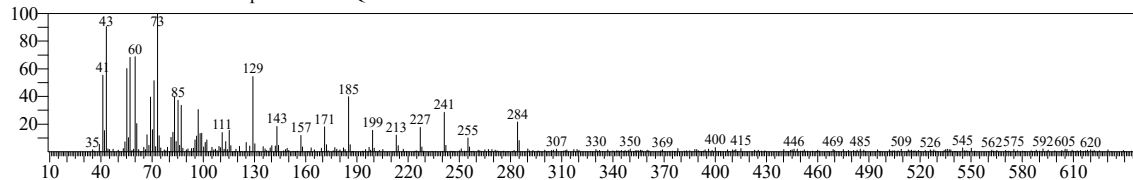

Hit#:1 Entry:34463 Library:NIST20R.lib

SI:91 Formula:C18H36O2 CAS:57-11-4 MolWeight:284 RetIndex:2167

CompName:Octadecanoic acid \$\$ Stearic acid \$\$ n-Octadecanoic acid \$\$ Humko Industriene R \$\$ Hydrofol Acid 150 \$\$ Hystrene S-97 \$\$ Hystrene T-70 \$

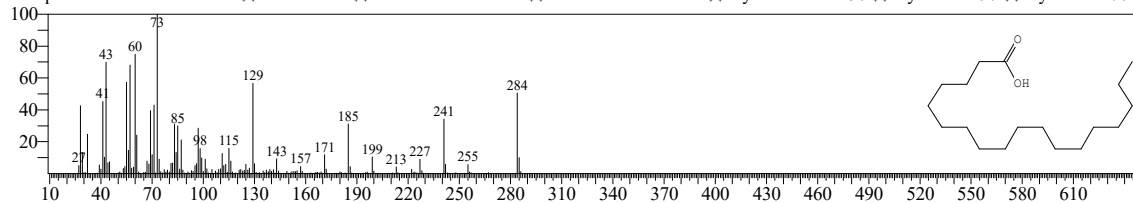

Hit#:2 Entry:29890 Library:NIST20R.lib

SI:88 Formula:C15H30O2 CAS:1002-84-2 MolWeight:242 RetIndex:1869

CompName:Pentadecanoic acid \$\$ Pentadecylic acid \$\$ n-Pentadecanoic acid \$\$ n-Pentadecylic acid

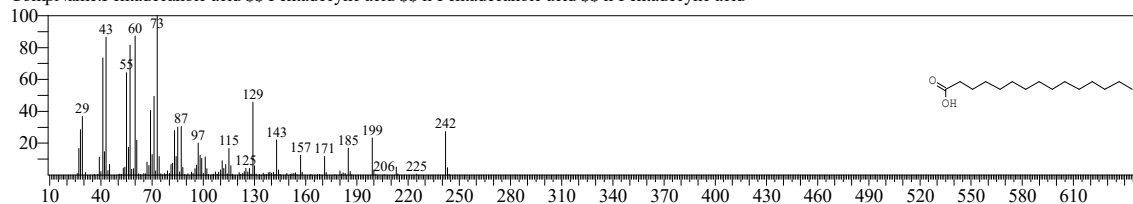

Hit#:3 Entry:44286 Library:NIST20M2.lib

SI:87 Formula:C38H68O8 CAS:28474-90-0 MolWeight:652 RetIndex:4765

CompName:l-(+)-Ascorbic acid 2,6-dihexadecanoate

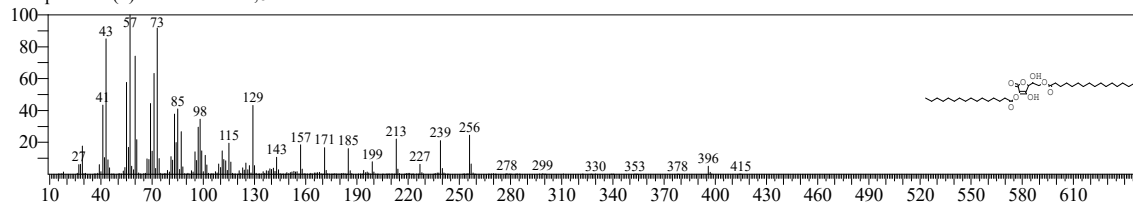

Hit#:4 Entry:31599 Library:NIST20R.lib

SI:87 Formula:C16H32O2 CAS:57-10-3 MolWeight:256 RetIndex:1968

CompName:n-Hexadecanoic acid \$\$ Hexadecanoic acid \$\$ n-Hexadecanoic acid \$\$ Palmitic acid \$\$ Pentadecanecarboxylic acid \$\$ 1-Pentadecanecarboxylic

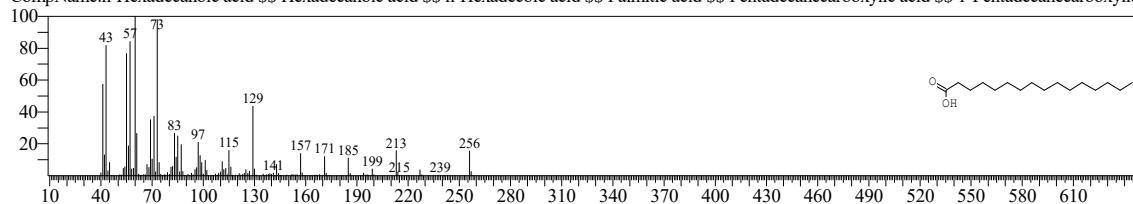

Hit#:5 Entry:178153 Library:NIST20M1.lib

SI:86 Formula:C20H40O2 CAS:506-30-9 MolWeight:312 RetIndex:2366

CompName:Eicosanoic acid \$\$ Arachic acid \$\$ Arachidic acid \$\$ Icosanoic acid \$\$ n-Eicosanoic acid \$\$ Arachidic acid (synthetic)

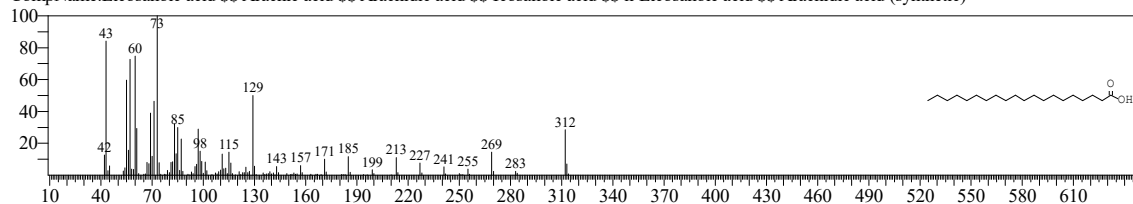

# TNAU

<< Target >>

Line#:17 R.Time:45.625(Scan#:8126) MassPeaks:430

RawMode:Averaged 45.620-45.630(8125-8127) BasePeak:139.10(7505)

BG Mode:Calc. from Peak Group 1 - Event 1 Q3 Scan

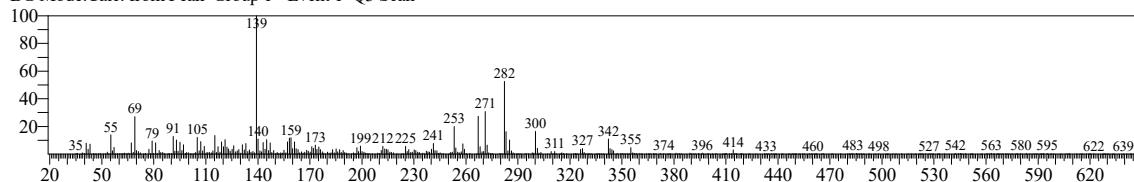

Hit#:1 Entry:8297 Library:NIST20M2.lib

SI:90 Formula:C27H42O3 CAS:512-04-9 MolWeight:414 RetIndex:2844

CompName:Diosgenin \$\$ Spirost-5-en-3-ol, (3.beta.,25R)- \$\$ Spirost-5-en-3.beta.-ol, (25R)- \$\$ Nitrogenin \$\$ 25D-spirost-5-en-3.beta.-ol \$\$ Spiro(8H-naph

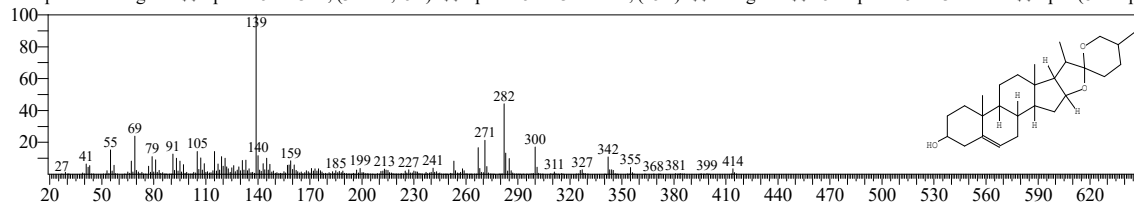

Hit#:2 Entry:14852 Library:NIST20M2.lib

SI:82 Formula:C28H44O3 CAS:116292-24-1 MolWeight:428 RetIndex:2793

CompName:Diosgenin methyl ether \$\$ Diosgenin Me derivative \$\$ (3.beta.,25R)-3-Methoxyspirost-5-ene \$\$ Spirost-5-ene, 3-methoxy-, (3.beta.,25R)-

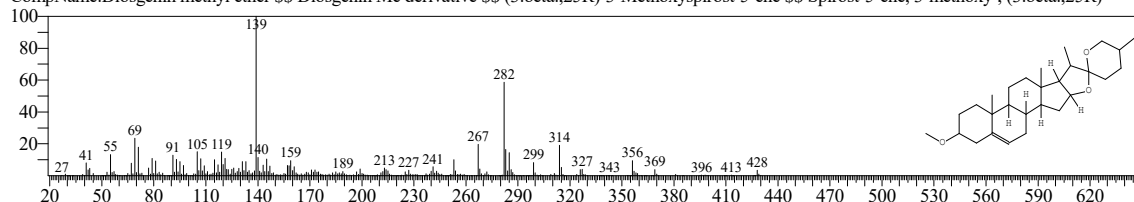

Hit#:3 Entry:24878 Library:NIST20M2.lib

SI:81 Formula:C29H44O4 CAS:1061-54-7 MolWeight:456 RetIndex:2984

CompName:Spirost-5-en-3-ol, acetate, (3.beta.,25R)- \$\$ Diosgenin acetate \$\$ Spirost-5-en-3.beta.-ol, acetate, (25R)- \$\$ Spirost-5-en-3.beta.-ol, acetate, (2-

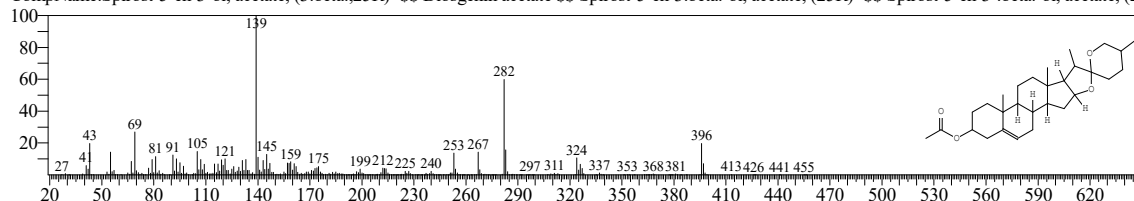

Hit#:4 Entry:41561 Library:NIST20R.lib

SI:80 Formula:C27H42O2 CAS:32277-73-9 MolWeight:398 RetIndex:2713

CompName:Des-N-solasodine \$\$ Furosta-5,20(22)-dien-3-ol #

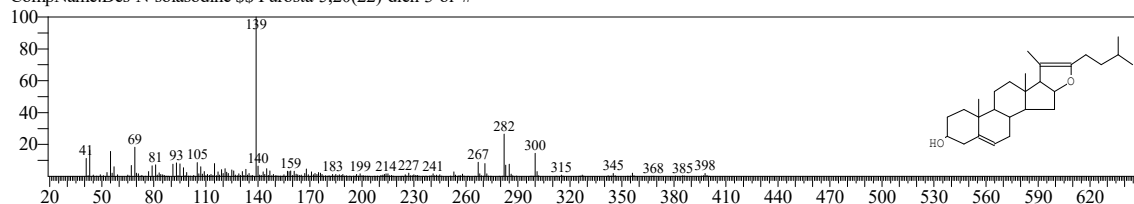

Hit#:5 Entry:42677 Library:NIST20R.lib

SI:75 Formula:C29H44O4 CAS:1180-12-7 MolWeight:456 RetIndex:2984

CompName:Neodiosgenin (3.beta.,25S) acetate \$\$ Spirost-5-en-3-ol, 3-acetate, (3.beta.,25S)- \$\$ Spirost-5-en-3-ol, 3-acetate, (3.beta.,25S)- \$\$ Spirost-5-en-3-

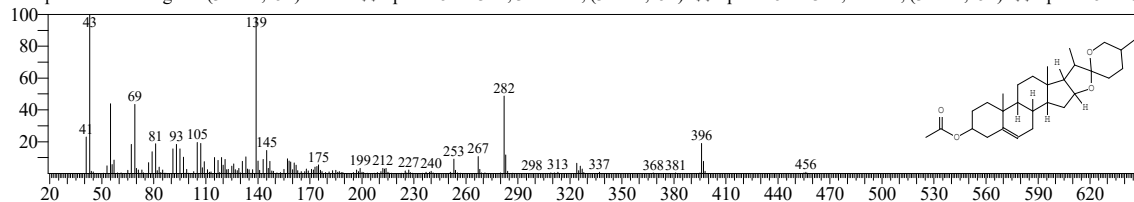

Supplement: Supplementary file 48 [file supplementary]
