# Supplementary material for: Comparative Metabolomics Profiling Reveals Key Metabolites and Associated Pathways Regulating Tuber Dormancy in White Yam (<em>Dioscorea rotundata</em>)
Source: Preprints.org preprint supplement (doi:10.20944/preprints202303.0378.v1), 2023-03-21

# TNAU

## Sample Information

Analyzed by : Admin  
 Analyzed : 02-Sep-22 4:26:36 PM  
 Sample Type : Unknown  
 Level # : 1  
 Sample Name : Sample  
 Sample ID : 9-2  
 IS Amount : [1]=1  
 Sample Amount : 1  
 Dilution Factor : 1  
 Vial # : 10  
 Injection Volume : 5.00  
 Data File : D:\GCMS-8040NX\Sep 2022\Users\01.09.2022\01092022027.qgd  
 Org Data File : D:\GCMS-8040NX\Sep 2022\Users\01.09.2022\01092022027.qgd  
 Method File : D:\GCMS-8040NX\Sep 2022\Method\Scan\_methodfile.qgm  
 Org Method File : D:\GCMS-8040NX\Sep 2022\Method\Scan\_methodfile.qgm  
 Report File :  
 Tuning File : D:\GCMS-8040NX\Aug 2022\Tuning Data\TUNING 25082022.qgt  
 Modified by : Admin  
 Modified : 05-Sep-22 11:08:21 AM

Chromatogram Sample D:\GCMS-8040NX\Sep 2022\Users\01.09.2022\01092022027.qgd

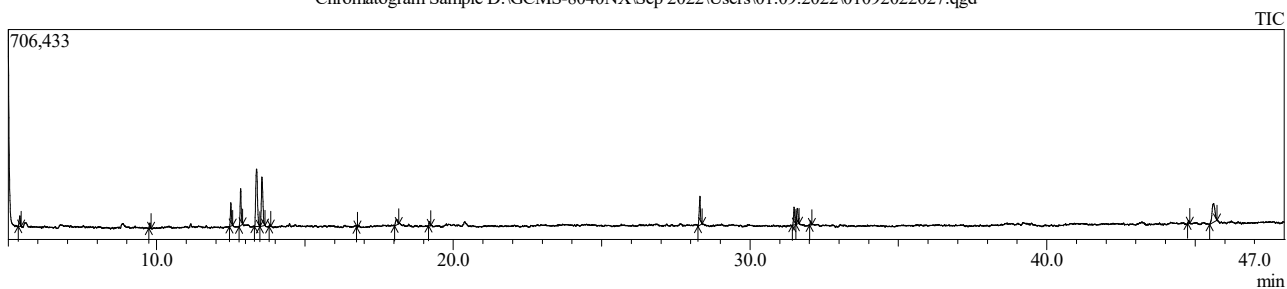

## Peak Report TIC

| Peak# | R.Time | Area    | Area%  | Height | Height% | A/H  | Similarity | Name                                    |
|-------|--------|---------|--------|--------|---------|------|------------|-----------------------------------------|
| 1     | 5.393  | 94550   | 2.87   | 35872  | 3.74    | 2.64 | 81         | Sarcosine, N-trifluoroacetyl-           |
| 2     | 9.775  | 38738   | 1.18   | 18075  | 1.89    | 2.14 | 94         | Pentasiloxane, dodecamethyl-            |
| 3     | 12.504 | 195099  | 5.93   | 79269  | 8.27    | 2.46 | 74         | 1,3-Benzodioxol-5-ol                    |
| 4     | 12.833 | 325622  | 9.89   | 124641 | 13.01   | 2.61 | 74         | 1,3-Benzodioxol-5-ol                    |
| 5     | 13.370 | 778404  | 23.64  | 193374 | 20.18   | 4.03 | 53         | Methyl cis-13,16-Docosadienate          |
| 6     | 13.552 | 612631  | 18.61  | 165437 | 17.27   | 3.70 | 53         | Methyl cis-13,16-Docosadienate          |
| 7     | 13.817 | 12960   | 0.39   | 7735   | 0.81    | 1.68 | 70         | Trisiloxane, octamethyl-                |
| 8     | 16.753 | 7829    | 0.24   | 5622   | 0.59    | 1.39 | 21         | Methyl elaidate                         |
| 9     | 18.082 | 86108   | 2.62   | 18825  | 1.96    | 4.57 | 92         | .beta.-D-Glucopyranose, 1,6-anhydro-    |
| 10    | 19.197 | 32657   | 0.99   | 13282  | 1.39    | 2.46 | 87         | 2,4-Di-tert-butylphenoxytrimethylsilane |
| 11    | 28.311 | 279955  | 8.50   | 97191  | 10.14   | 2.88 | 95         | n-Hexadecanoic acid                     |
| 12    | 31.484 | 170521  | 5.18   | 59889  | 6.25    | 2.85 | 94         | 10E,12Z-Octadecadienoic acid            |
| 13    | 31.595 | 170660  | 5.18   | 52755  | 5.51    | 3.23 | 89         | cis-9-Hexadecenal                       |
| 14    | 32.042 | 30469   | 0.93   | 13763  | 1.44    | 2.21 | 90         | Octadecanoic acid                       |
| 15    | 44.777 | 21839   | 0.66   | 9495   | 0.99    | 2.30 | 82         | Squalene                                |
| 16    | 45.623 | 434326  | 13.19  | 62923  | 6.57    | 6.90 | 89         | Diosgenin                               |
|       |        | 3292368 | 100.00 | 958148 | 100.00  |      |            |                                         |

Library

# TNAU

<< Target >>

Line#:1 R.Time:5.390(Scan#:79) MassPeaks:357

RawMode:Averaged 5.385-5.395(78-80) BasePeak:140.00(13277)

BG Mode:Calc. from Peak Group 1 - Event 1 Q3 Scan

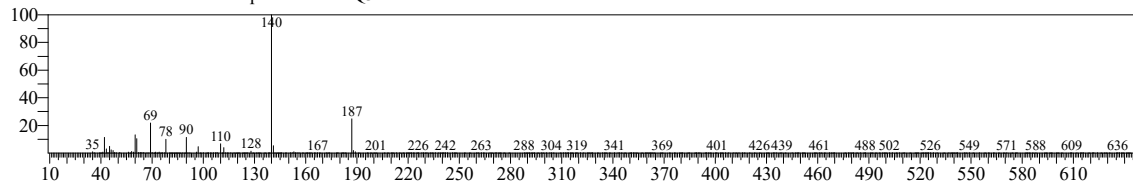

Hit#:1 Entry:40334 Library:NIST20M1.lib

SI:81 Formula:C5H6F3NO3 CAS:0-00-0 MolWeight:185 RetIndex:910

CompName:Sarcosine, N-trifluoroacetyl-

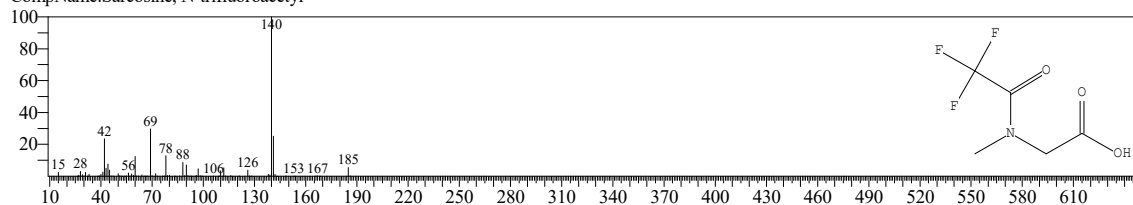

Hit#:2 Entry:43299 Library:NIST20M1.lib

SI:80 Formula:C5H7ClF3NO CAS:18060-05-4 MolWeight:189 RetIndex:779

CompName:(2-Chloroethyl)(methyl)amine, N-trifluoroacetyl- \$\$ (2-Chloroethyl)(methyl)amine, TFA derivative \$\$ Ethanamine, 2-chloro-N-methyl-, N-trifluoro-

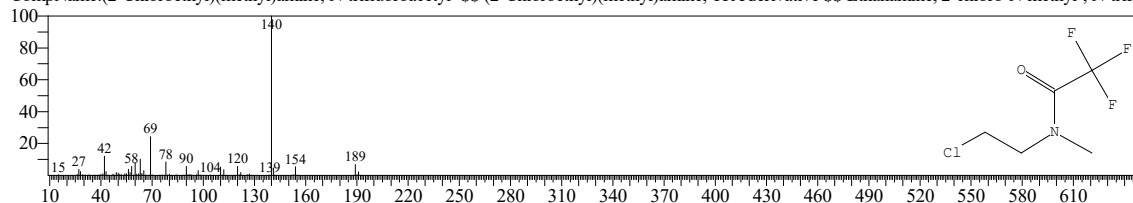

Hit#:3 Entry:52064 Library:NIST20M1.lib

SI:80 Formula:C6H8F3NO3 CAS:0-00-0 MolWeight:199 RetIndex:820

CompName:Sarcosine, N-trifluoroacetyl-, methyl ester

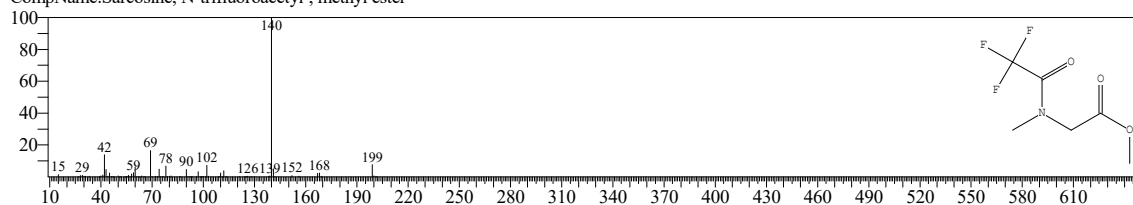

Hit#:4 Entry:122117 Library:NIST20M1.lib

SI:78 Formula:C7H8F6N2O2 CAS:0-00-0 MolWeight:266 RetIndex:987

CompName:2,2,2-Trifluoro-N-methyl-N-[2-[(trifluoroacetyl)amino]ethyl]acetamide

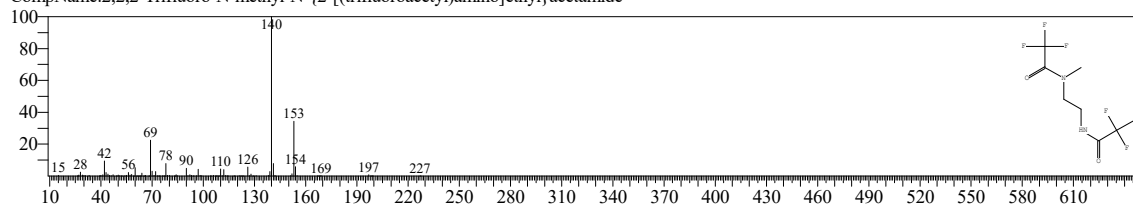

Hit#:5 Entry:65348 Library:NIST20M1.lib

SI:78 Formula:C7H10F3NO3 CAS:0-00-0 MolWeight:213 RetIndex:919

CompName:Sarcosine, N-trifluoroacetyl-, ethyl ester

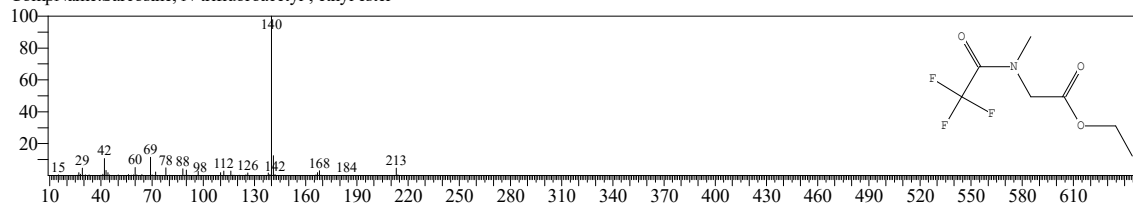

# TNAU

<< Target >>

Line# 2 R.Time: 9.775 (Scan#: 956) MassPeaks: 313

Raw Mode: Averaged 9.770-9.780 (955-957) BasePeak: 281.05 (5016)

BG Mode: Calc. from Peak Group 1 - Event 1 Q3 Scan

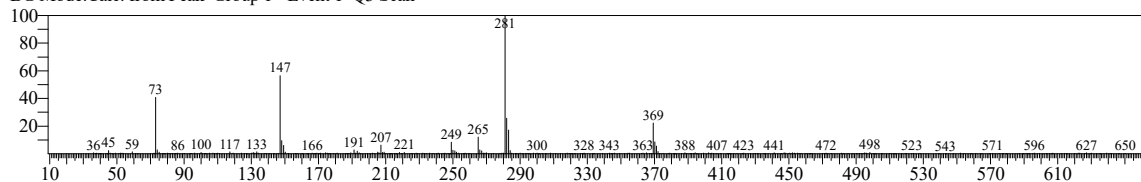

Hit#1 Entry: 40975 Library: NIST20R.lib

SI: 94 Formula: C<sub>12</sub>H<sub>36</sub>O<sub>4</sub>Si<sub>5</sub> CAS: 141-63-9 MolWeight: 384 RetIndex: 1068

CompName: Pentasiloxane, dodecamethyl- \$\$ Dodecamethylpentasiloxane \$\$ 1,1,1,3,3,5,5,7,7,9,9-Dodecamethylpentasiloxane #

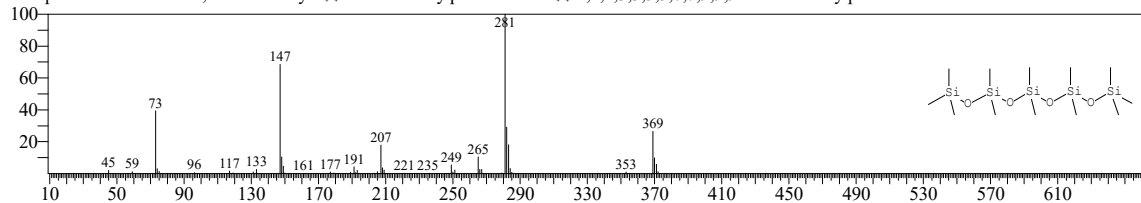

Hit#2 Entry: 249272 Library: NIST20M1.lib

SI: 83 Formula: C<sub>12</sub>H<sub>36</sub>O<sub>4</sub>Si<sub>5</sub> CAS: 3555-47-3 MolWeight: 384 RetIndex: 1068

CompName: Trisiloxane, 1,1,1,5,5,5-hexamethyl-3,3-bis[(trimethylsilyl)oxy]- \$\$ Tetrakis(trimethylsiloxy)silane \$\$ Trisiloxane, 1,1,1,5,5,5-hexamethyl-3,3-b

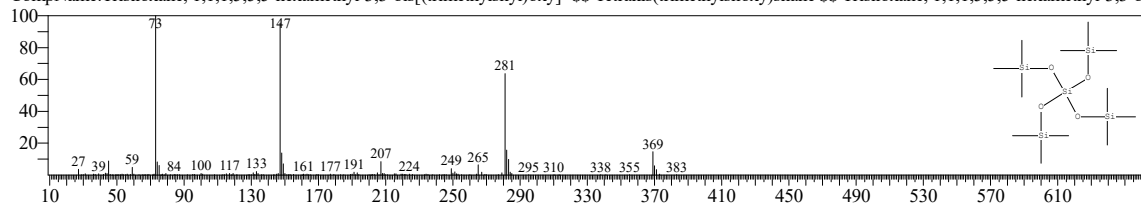

Hit#3 Entry: 249271 Library: NIST20M1.lib

SI: 80 Formula: C<sub>12</sub>H<sub>36</sub>O<sub>4</sub>Si<sub>5</sub> CAS: 38146-99-5 MolWeight: 384 RetIndex: 1068

CompName: 1,1,1,3,3,5,5,7,7,7-Nonamethyl-3-(trimethylsiloxy)tetrasiloxane \$\$ 1,1,1,3,3,5,5,7,7,7-Nonamethyl-5-[(trimethylsilyl)oxy]tetrasiloxane #

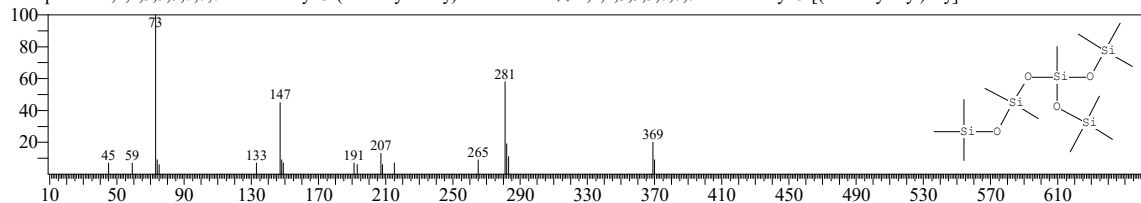

Hit#4 Entry: 27848 Library: NIST20M2.lib

SI: 80 Formula: C<sub>18</sub>H<sub>48</sub>O<sub>4</sub>Si<sub>5</sub> CAS: 0-00-0 MolWeight: 468 RetIndex: 1495

CompName: 1,3,5,7,9-Pentasiloxane, 1,1,3,3,5,5,7,7,9-decamethyl-1,9-di(tert.butyl)-

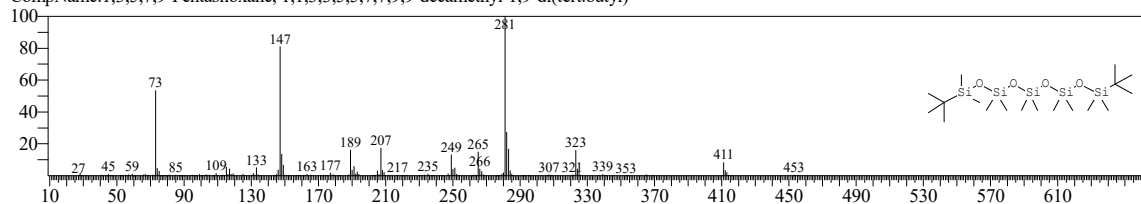

Hit#5 Entry: 158097 Library: NIST20M1.lib

SI: 77 Formula: C<sub>14</sub>H<sub>24</sub>O<sub>3</sub>Si<sub>2</sub> CAS: 0-00-0 MolWeight: 296 RetIndex: 1625

CompName: 2,6-Dihydroxyacetophenone, 2TMS derivative \$\$ 2',6'-Dihydroxyacetophenone, bis(trimethylsilyl) ether

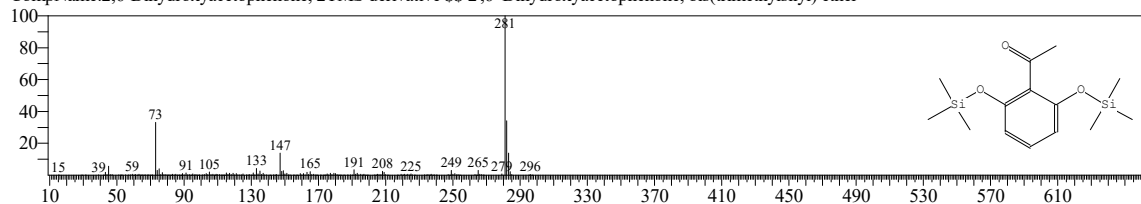

# TNAU

<< Target >>

Line#3 R.Time:12.505(Scan#:1502) MassPeaks:336

RawMode:Averaged 12.500-12.510(1501-1503) BasePeak:138.05(28393)

BG Mode:Calc. from Peak Group 1 - Event 1 Q3 Scan

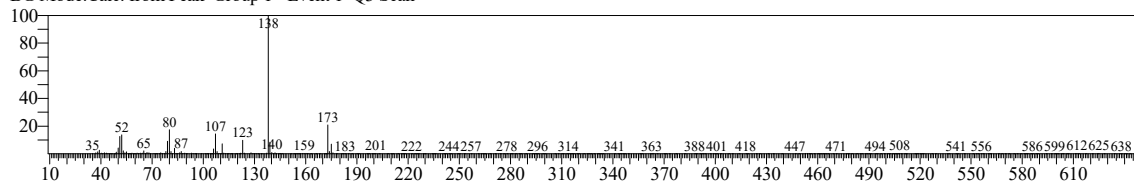

Hit#:1 Entry:11187 Library:NIST20M1.lib

SI:74 Formula:C7H6O3 CAS:533-31-3 MolWeight:138 RetIndex:1245

CompName:1,3-Benzodioxol-5-ol \$\$ Phenol, 3,4-(methylenedioxy)- \$\$ Sesamol \$\$ 3,4-(Methylenedioxy)phenol \$\$ 5-Hydroxy-1,3-benzodioxole \$\$ Methy

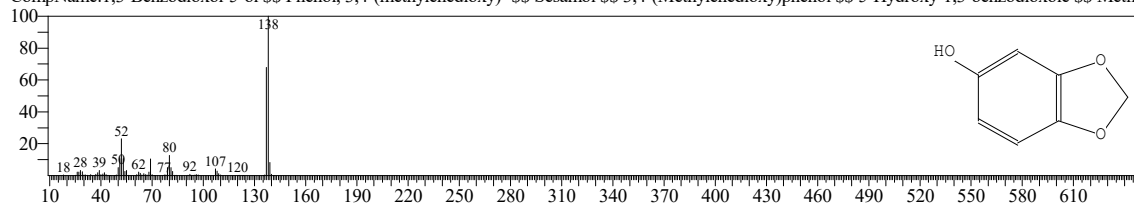

Hit#:2 Entry:8360 Library:NIST20R.lib

SI:73 Formula:C6H6N2O2 CAS:105-11-3 MolWeight:138 RetIndex:1349

CompName:2,5-Cyclohexadiene-1,4-dione, dioxime \$\$ p-Benzoquinone, dioxime \$\$ p-Quinone dioxime \$\$ p-Quinone oxime \$\$ Benzoquinone dioxime \$\$

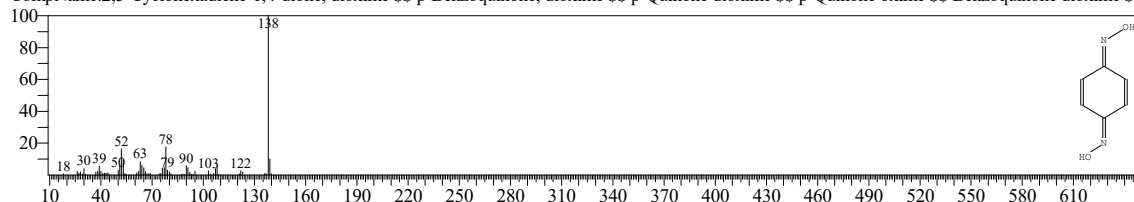

Hit#:3 Entry:11188 Library:NIST20M1.lib

SI:73 Formula:C7H6O3 CAS:69393-72-2 MolWeight:138 RetIndex:1245

CompName:2,3-Methylenedioxyphenol \$\$ 1,3-Benzodioxol-4-ol #

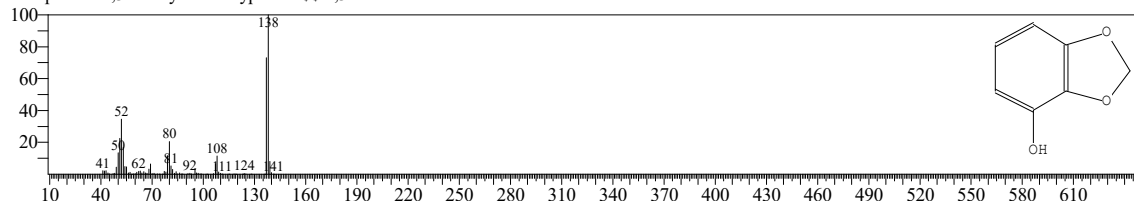

Hit#:4 Entry:8422 Library:NIST20R.lib

SI:72 Formula:C7H10N2O CAS:25680-58-4 MolWeight:138 RetIndex:1070

CompName:2-Ethyl-3-methoxypyrazine \$\$ 2-Methoxy-3-ethylpyrazine \$\$ Pyrazine, 2-ethyl-3-methoxy- \$\$ 3-Ethyl-2-methoxypyrazine \$\$ Pyrazine, 3-ethyl-

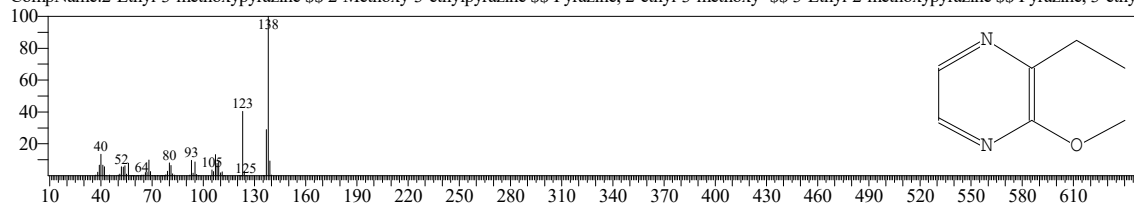

Hit#:5 Entry:36491 Library:NIST20M1.lib

SI:71 Formula:C9H8O4 CAS:326-58-9 MolWeight:180 RetIndex:1404

CompName:1,3-Benzodioxol-5-ol, acetate

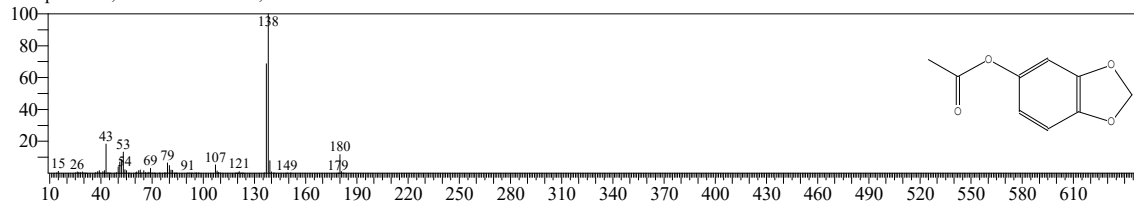

# TNAU

<< Target >>

Line#4 R.Time:12.835(Scan#:1568) MassPeaks:388

RawMode:Averaged 12.830-12.840(1567-1569) BasePeak:138.05(42892)

BG Mode:Calc. from Peak Group 1 - Event 1 Q3 Scan

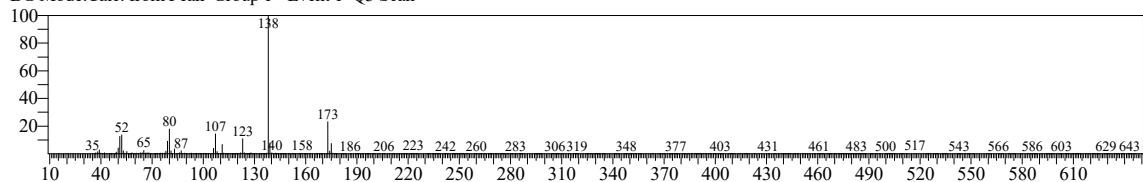

Hit#:1 Entry:11187 Library:NIST20M1.lib

SI:74 Formula:C7H6O3 CAS:533-31-3 MolWeight:138 RetIndex:1245

CompName:1,3-Benzodioxol-5-ol \$\$ Phenol, 3,4-(methylenedioxy)- \$\$ Sesamol \$\$ 3,4-(Methylenedioxy)phenol \$\$ 5-Hydroxy-1,3-benzodioxole \$\$ Methy

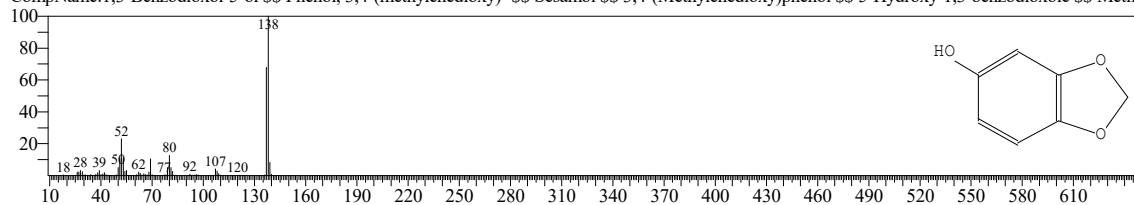

Hit#:2 Entry:8360 Library:NIST20R.lib

SI:73 Formula:C6H6N2O2 CAS:105-11-3 MolWeight:138 RetIndex:1349

CompName:2,5-Cyclohexadiene-1,4-dione, dioxime \$\$ p-Benzoquinone, dioxime \$\$ p-Quinone dioxime \$\$ p-Quinone oxime \$\$ Benzoquinone dioxime \$\$

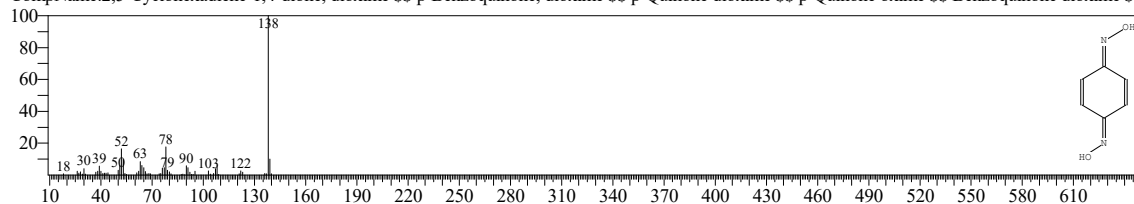

Hit#:3 Entry:11188 Library:NIST20M1.lib

SI:72 Formula:C7H6O3 CAS:69393-72-2 MolWeight:138 RetIndex:1245

CompName:2,3-Methylenedioxyphenol \$\$ 1,3-Benzodioxol-4-ol #

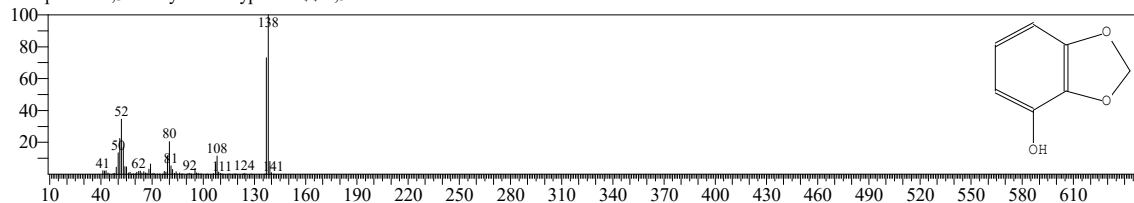

Hit#:4 Entry:8422 Library:NIST20R.lib

SI:71 Formula:C7H10N2O CAS:25680-58-4 MolWeight:138 RetIndex:1070

CompName:2-Ethyl-3-methoxypyrazine \$\$ 2-Methoxy-3-ethylpyrazine \$\$ Pyrazine, 2-ethyl-3-methoxy- \$\$ 3-Ethyl-2-methoxypyrazine \$\$ Pyrazine, 3-ethyl-



Hit#:5 Entry:11222 Library:NIST20M1.lib

SI:71 Formula:C7H10N2O CAS:3471-32-7 MolWeight:138 RetIndex:1325

CompName:Hydrazine, (4-methoxyphenyl)- \$\$ (p-Methoxyphenyl)hydrazine \$\$ 1-(4-Methoxyphenyl)hydrazine #

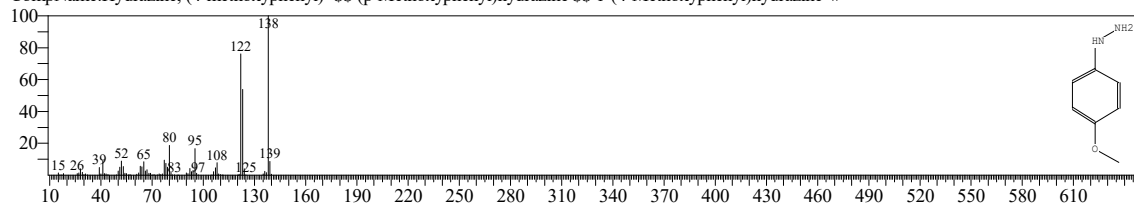

# TNAU

<< Target >>

Line#:5 R.Time:13.370(Scan#:1675) MassPeaks:329

RawMode:Averaged 13.365-13.375(1674-1676) BasePeak:155.05(32662)

BG Mode:Calc. from Peak Group 1 - Event 1 Q3 Scan

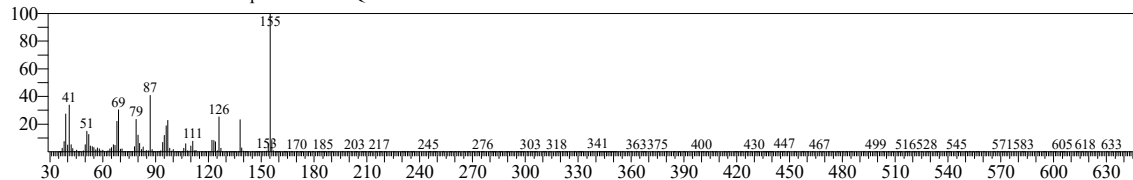

Hit#:1 Entry:34 Library:FA\_ME\_SP2560\_EI\_V3.lib

SI:53 Formula:C23H42O2 CAS:7370-49-2 MolWeight:350 RetIndex:3169

CompName:Methyl cis-13,16-Docosadienate ; (13Z,16E)-docosa-13,16-dienoic acid

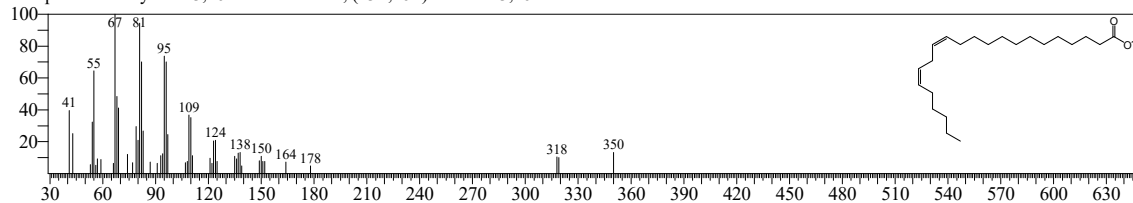

Hit#:2 Entry:21 Library:FA\_ME\_SP2560\_EI\_V3.lib

SI:52 Formula:C19H34O2 CAS:60-33-3 MolWeight:294 RetIndex:2775

CompName:Methyl linoleate ; Octadeca-9,12-dienoic acid

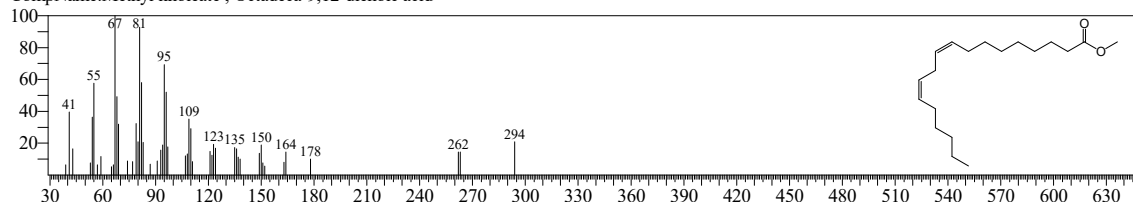

Hit#:3 Entry:20 Library:FA\_ME\_SP2560\_EI\_V3.lib

SI:51 Formula:C19H34O2 CAS:506-21-8 MolWeight:294 RetIndex:2727

CompName:Methyl linolelaidate ; (9E,12E)-octadeca-9,12-dienoic acid

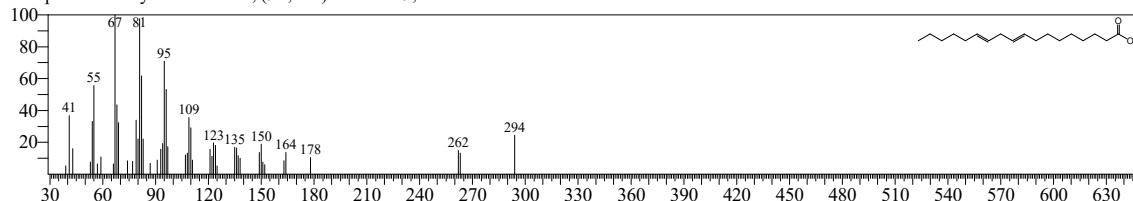

Hit#:4 Entry:11 Library:FA\_ME\_SP2560\_EI\_V3.lib

SI:51 Formula:C16H30O2 CAS:84743-29-3 MolWeight:254 RetIndex:2388

CompName:Methyl cis-10-pentadecenoate ; (Z)-pentadec-10-enoic acid

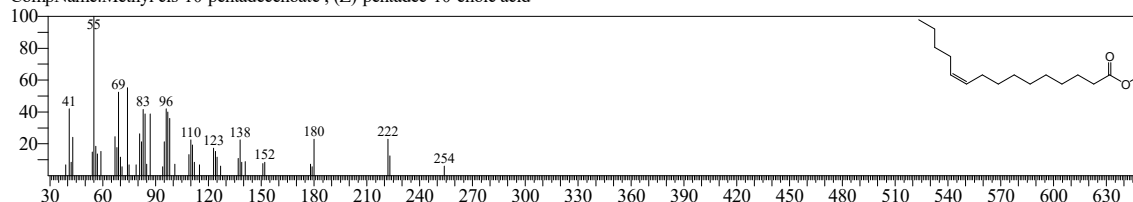

Hit#:5 Entry:27 Library:FA\_ME\_SP2560\_EI\_V3.lib

SI:51 Formula:C21H38O2 CAS:2091-39-6 MolWeight:322 RetIndex:2973

CompName:Methyl cis-11,14-Icosadienoate ; ; Icosa-11,14-dienoic acid

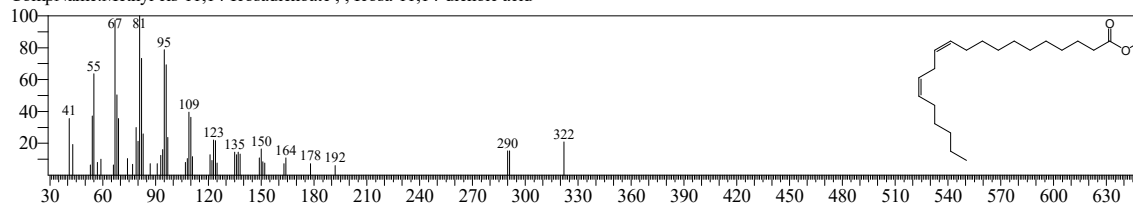

# TNAU

<< Target >>

Line#:6 R.Time:13.550(Scan#:1711) MassPeaks:404

RawMode:Averaged 13.545-13.555(1710-1712) BasePeak:155.05(27533)

BG Mode:Calc. from Peak Group 1 - Event 1 Q3 Scan

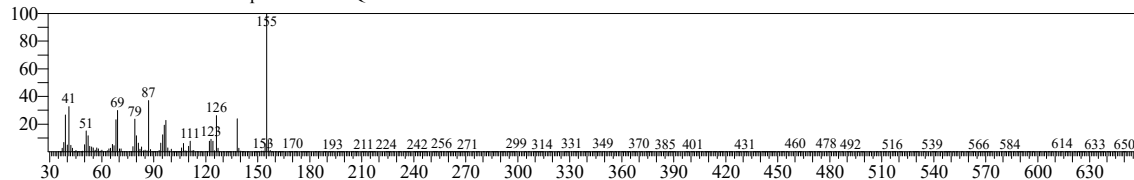

Hit#:1 Entry:34 Library:FA\_ME\_SP2560\_EI\_V3.lib

SI:53 Formula:C23H42O2 CAS:7370-49-2 MolWeight:350 RetIndex:3169

CompName:Methyl cis-13,16-Docosadienoate ; (13Z,16E)-docosa-13,16-dienoic acid

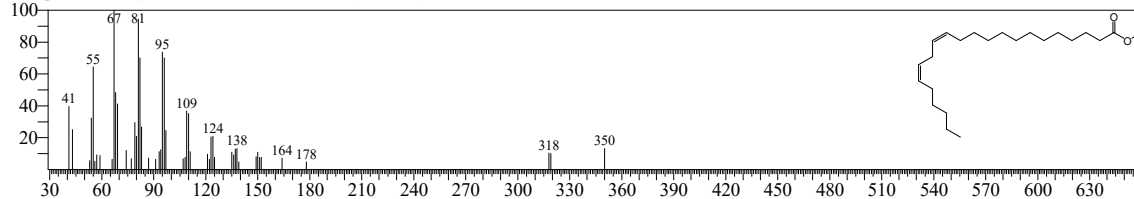

Hit#:2 Entry:21 Library:FA\_ME\_SP2560\_EI\_V3.lib

SI:52 Formula:C19H34O2 CAS:60-33-3 MolWeight:294 RetIndex:2775

CompName:Methyl linoleate ; Octadeca-9,12-dienoic acid

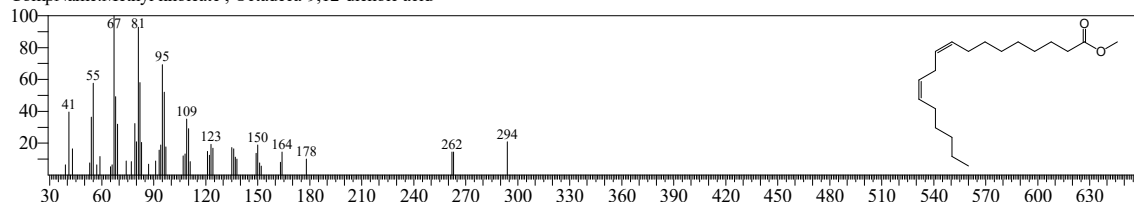

Hit#:3 Entry:20 Library:FA\_ME\_SP2560\_EI\_V3.lib

SI:51 Formula:C19H34O2 CAS:506-21-8 MolWeight:294 RetIndex:2727

CompName:Methyl linolelaidate ; (9E,12E)-octadeca-9,12-dienoic acid

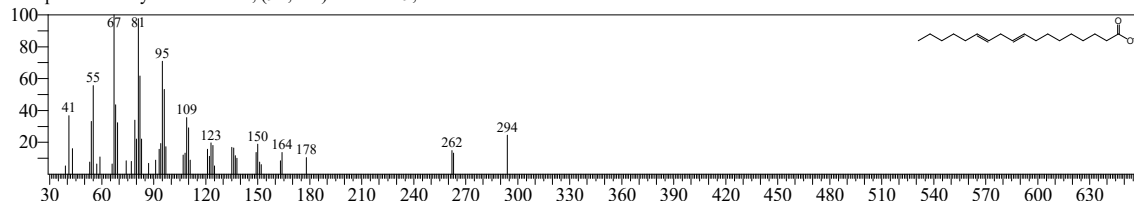

Hit#:4 Entry:11 Library:FA\_ME\_SP2560\_EI\_V3.lib

SI:51 Formula:C16H30O2 CAS:84743-29-3 MolWeight:254 RetIndex:2388

CompName:Methyl cis-10-pentadecenoate ; (Z)-pentadec-10-enoic acid

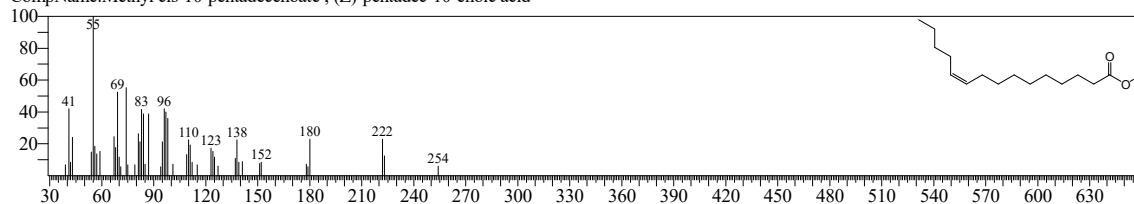

Hit#:5 Entry:27 Library:FA\_ME\_SP2560\_EI\_V3.lib

SI:51 Formula:C21H38O2 CAS:2091-39-6 MolWeight:322 RetIndex:2973

CompName:Methyl cis-11,14-Icosadienoate ; ; Icosa-11,14-dienoic acid

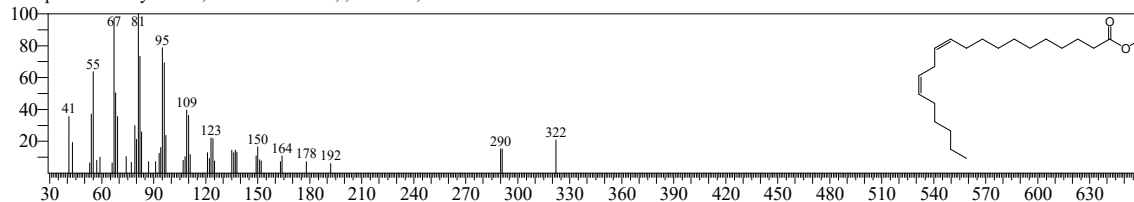

# TNAU

<< Target >>

Line#:7 R.Time:13.815(Scan#:1764) MassPeaks:367

RawMode:Averaged 13.810-13.820(1763-1765) BasePeak:221.05(1572)

BG Mode:Calc. from Peak Group 1 - Event 1 Q3 Scan

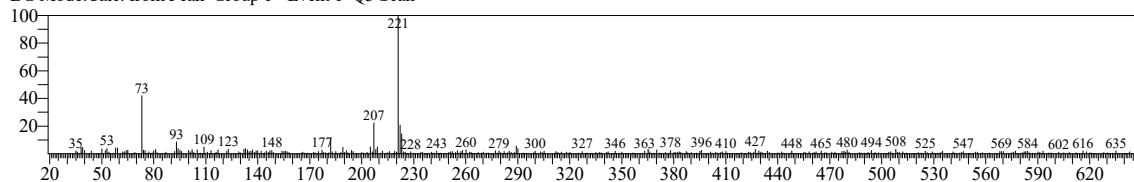

Hit#:1 Entry:28950 Library:NIST20R.lib

SI:70 Formula:C<sub>8</sub>H<sub>24</sub>O<sub>2</sub>Si<sub>3</sub> CAS:107-51-7 MolWeight:236 RetIndex:698

CompName:Trisiloxane, octamethyl- \$- \$ Octamethyltrisiloxane \$- \$ Silane, dimethylbis(trimethylsiloxy)- \$- \$ 1,1,1,3,3,5,5,5-Octamethyltrisiloxane \$- \$ [(CH<sub>3</sub>)<sub>3</sub>Si]<sub>2</sub>O-Si(CH<sub>3</sub>)<sub>3</sub>

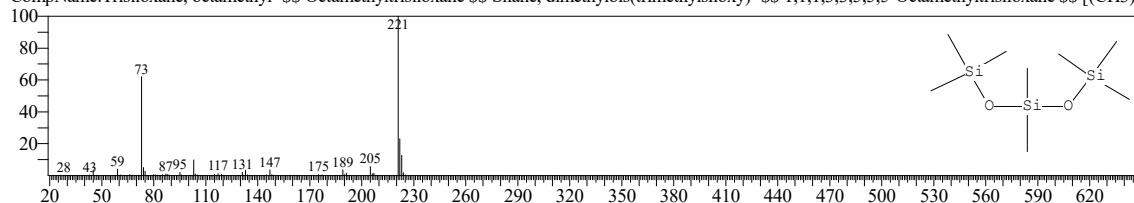

Hit#:2 Entry:3 Library:OA\_TMS\_DB5\_67min\_V3.lib

SI:53 Formula:C<sub>9</sub>H<sub>27</sub>BO<sub>3</sub>Si<sub>3</sub> CAS:10043-35-3 MolWeight:278 RetIndex:992

CompName:Boric acid-3TMS ; boric acid

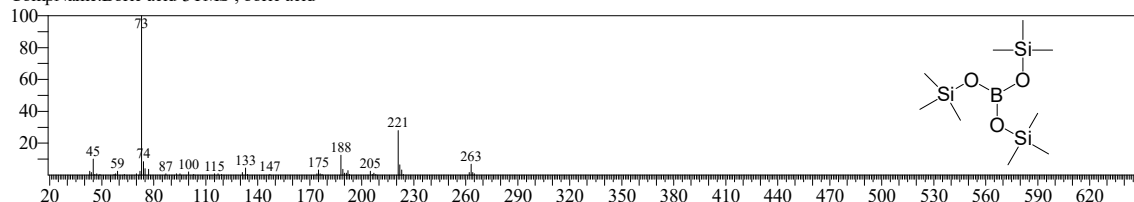

Hit#:3 Entry:6 Library:OA\_TMS\_DB5\_67min\_V3.lib

SI:42 Formula:C<sub>5</sub>H<sub>9</sub>Cl<sub>3</sub>O<sub>2</sub>Si CAS:76-03-9 MolWeight:234 RetIndex:1059

CompName:Trichloroacetic acid-TMS ; 2,2,2-trichloroacetic acid

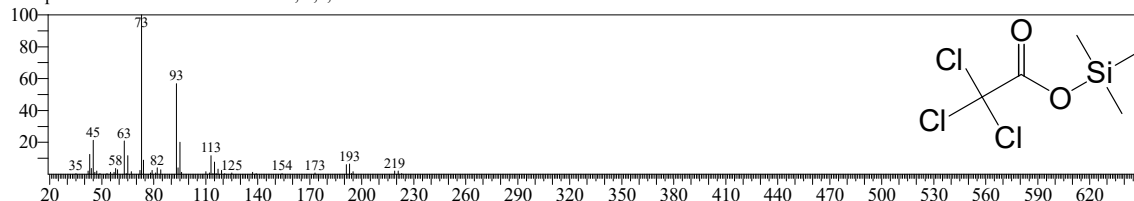

Hit#:4 Entry:97 Library:OA\_TMS\_DB5\_67min\_V3.lib

SI:39 Formula:C<sub>12</sub>H<sub>30</sub>O<sub>4</sub>Si<sub>3</sub> CAS:473-81-4 MolWeight:322 RetIndex:1339

CompName:Glyceric acid-3TMS ; 2,3-dihydroxypropanoic acid

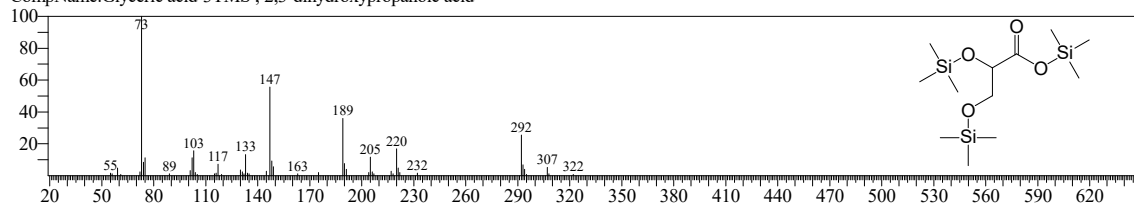

Hit#:5 Entry:287 Library:OA\_TMS\_DB5\_67min\_V3.lib

SI:38 Formula:C<sub>19</sub>H<sub>47</sub>NO<sub>5</sub>Si<sub>4</sub> CAS:3615-37-0 MolWeight:481 RetIndex:1768

CompName:Fucose-meto-4TMS(2) ; (2S,3R,4S,5R,6R)-6-methyloxane-2,3,4,5-tetrol

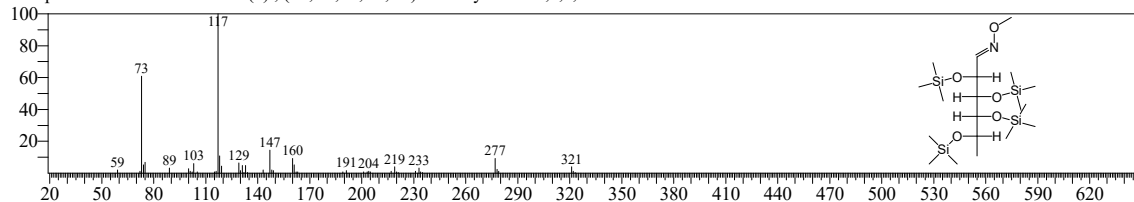



# TNAU

<< Target >>

Line#:8 R.Time:16.755(Scan#:2352) MassPeaks:436

RawMode:Averaged 16.750-16.760(2351-2353) BasePeak:424.00(74)

BG Mode:Calc. from Peak Group 1 - Event 1 Q3 Scan

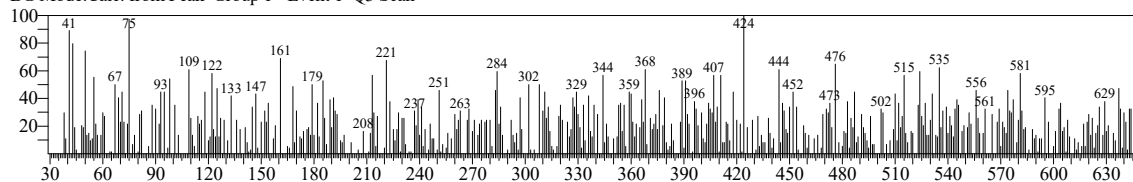

Hit#:1 Entry:17 Library:FA\_ME\_SP2560\_EI\_V3.lib

SI:21 Formula:C19H36O2 CAS:112-79-8 MolWeight:296 RetIndex:2653

CompName:Methyl elaidate ; (E)-octadec-9-enoic acid

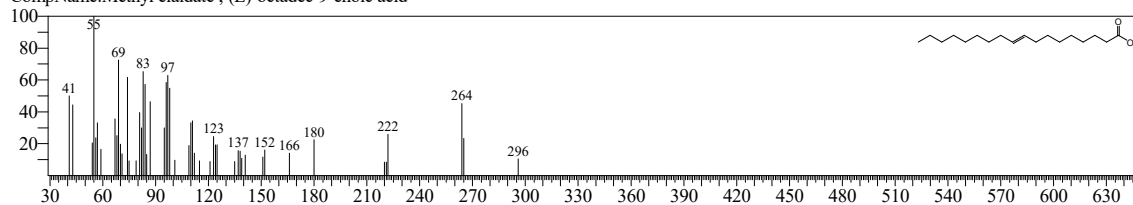

Hit#:2 Entry:15 Library:FA\_ME\_SP2560\_EI\_V3.lib

SI:21 Formula:C18H34O2 CAS:29743-97-3 MolWeight:282 RetIndex:2581

CompName:Methyl cis-10-heptadecenoate ; Heptadec-10-enoic acid

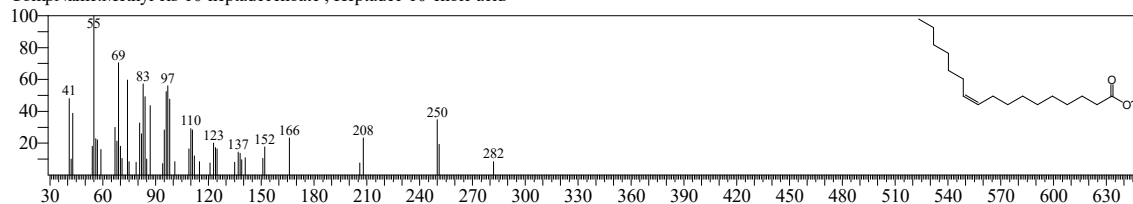

Hit#:3 Entry:18 Library:FA\_ME\_SP2560\_EI\_V3.lib

SI:20 Formula:C19H36O2 CAS:112-80-1 MolWeight:296 RetIndex:2675

CompName:Methyl oleate ; (Z)-octadec-9-enoic acid

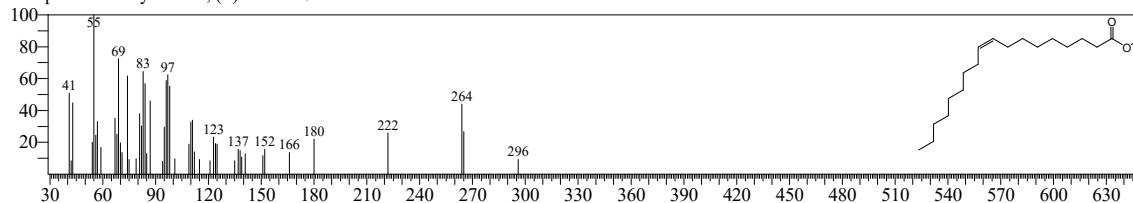

Hit#:4 Entry:24 Library:FA\_ME\_SP2560\_EI\_V3.lib

SI:19 Formula:C21H40O2 CAS:5561-99-9 MolWeight:324 RetIndex:2874

CompName:Methyl cis-11-icosenoate ; Icos-11-enoic acid

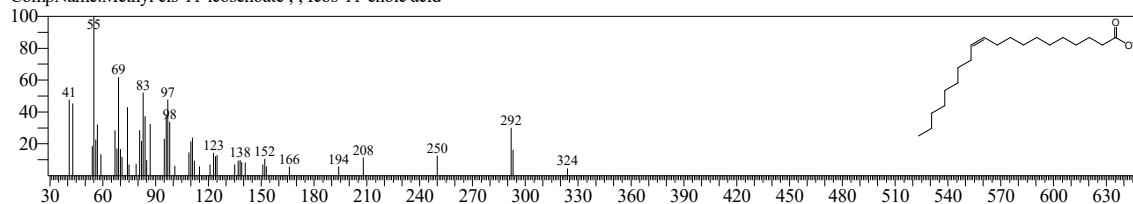

Hit#:5 Entry:30 Library:FA\_ME\_SP2560\_EI\_V3.lib

SI:19 Formula:C23H44O2 CAS:112-86-7 MolWeight:352 RetIndex:3070

CompName:Methyl erucate ; (Z)-docos-13-enoic acid

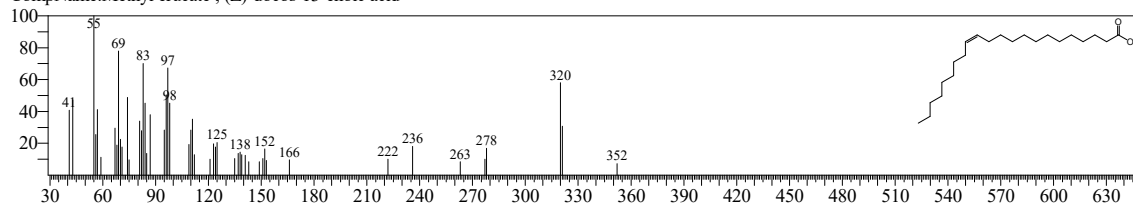

# TNAU

<< Target >>

Line#9 R.Time:18.080(Scan#:2617) MassPeaks:347

RawMode:Averaged 18.075-18.085(2616-2618) BasePeak:60.00(3708)

BG Mode:Calc. from Peak Group 1 - Event 1 Q3 Scan

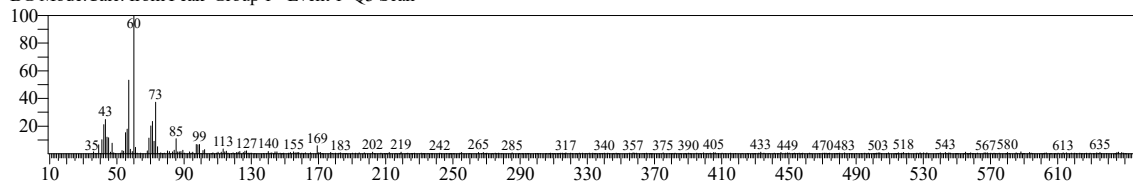

Hit#:1 Entry:13905 Library:NIST20R.lib

SI:92 Formula:C6H10O5 CAS:498-07-7 MolWeight:162 RetIndex:1404

CompName:.beta.-D-Glucopyranose, 1,6-anhydro- \$\$ Anhydro-d-mannosan \$\$ Levoglucosan \$\$ 1,6-Anhydro-.beta.-D-glucopyranose \$\$ 1,6-Anhydro-beta-

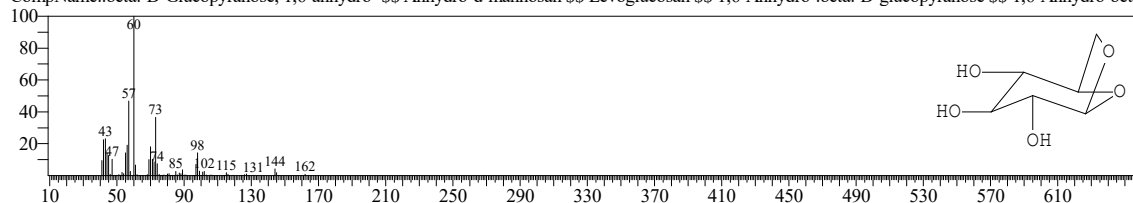

Hit#:2 Entry:36240 Library:NIST20M1.lib

SI:91 Formula:C6H12O6 CAS:2595-97-3 MolWeight:180 RetIndex:1698

CompName:D-Allose \$\$ .beta.-D-Allose \$\$ Hexose #

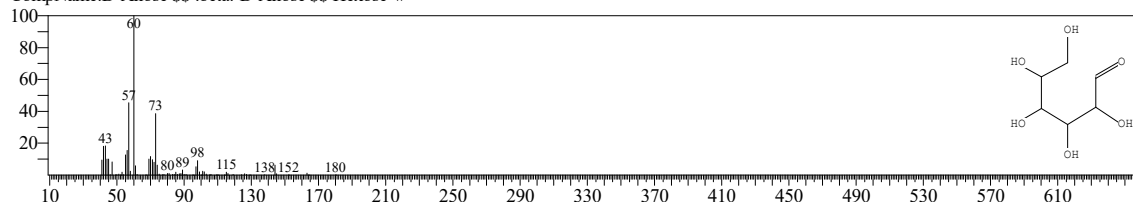

Hit#:3 Entry:23812 Library:NIST20M1.lib

SI:89 Formula:C6H10O5 CAS:0-00-0 MolWeight:162 RetIndex:1404

CompName:1,6-Anhydro-.beta.-d-talopyranose

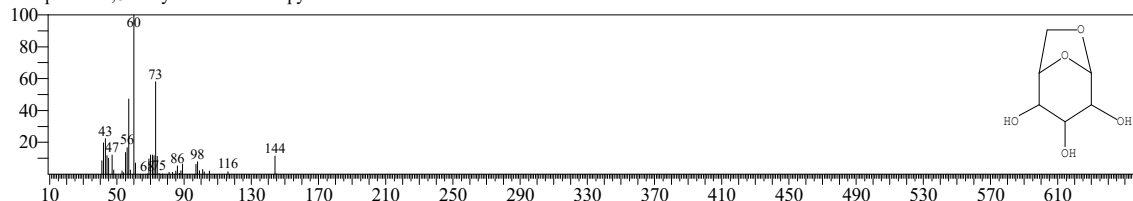

Hit#:4 Entry:23808 Library:NIST20M1.lib

SI:89 Formula:C6H10O5 CAS:0-00-0 MolWeight:162 RetIndex:1400

CompName:3,4-Altrosan \$\$ 3,4-Anhydrohexopyranose #

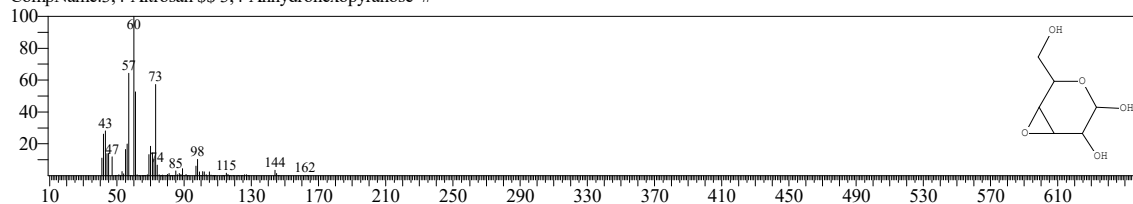

Hit#:5 Entry:211234 Library:NIST20M1.lib

SI:83 Formula:C12H22O11 CAS:14641-93-1 MolWeight:342 RetIndex:3131

CompName:.alpha.-D-Glucopyranose, 4-O-.beta.-D-galactopyranosyl- \$\$ 4-O-Hexopyranosylhexose #

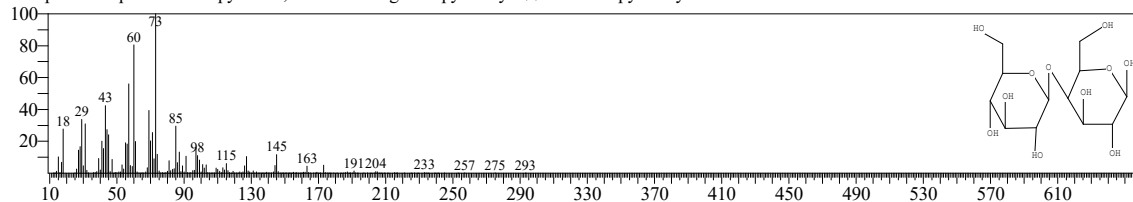

# TNAU

<< Target >>

Line#:10 R.Time:19.195(Scan#:2840) MassPeaks:365

RawMode:Averaged 19.190-19.200(2839-2841) BasePeak:263.20(4382)

BG Mode:Calc. from Peak Group 1 - Event 1 Q3 Scan

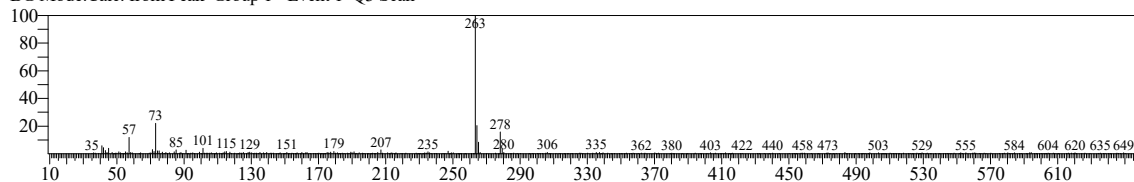

Hit#:1 Entry:33874 Library:NIST20R.lib

SI:87 Formula:C17H30OSi CAS:53925-65-8 MolWeight:278 RetIndex:1632

CompName:2,4-Di-tert-butylphenoxytrimethylsilane \$\$\$\$ Benzene, 2,4-bis(1,1-dimethylethyl)-1-[(trimethylsilyl)oxy]- \$\$\$\$ Silane, [2,4-bis(1,1-dimethylethyl)ph

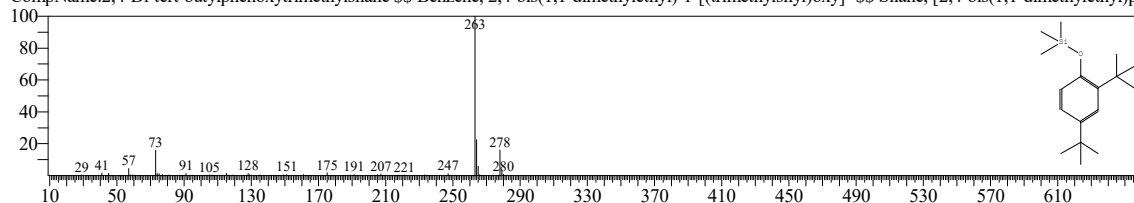

Hit#:2 Entry:33871 Library:NIST20R.lib

SI:79 Formula:C17H30OSi CAS:10416-73-6 MolWeight:278 RetIndex:1632

CompName:2,6-Bis(tert-butyl)phenol, TMS derivative \$\$\$\$ Trimethyl(2,6 ditert-butylphenoxy)silane \$\$\$\$ (2,6-Ditert-butylphenoxy)(trimethyl)silane #

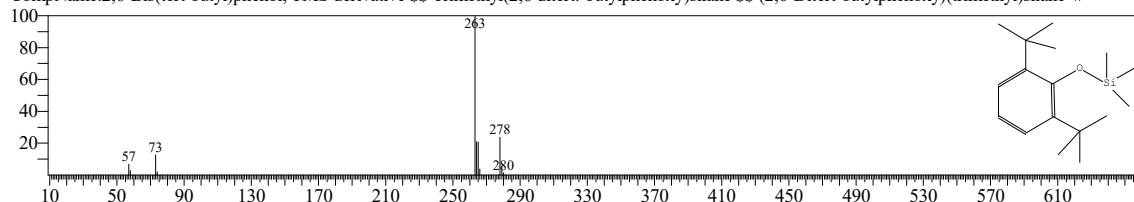

Hit#:3 Entry:136557 Library:NIST20M1.lib

SI:79 Formula:C12H22N4Si2 CAS:0-00-0 MolWeight:278 RetIndex:1703

CompName:3-Deazaadenine, 2TMS \$\$\$\$ 3-Deazaadenine, N,N'-bis-TMS \$\$\$\$ 1H-Imidazo[4,5-c]pyridin-4-amine, N,N'-bis-TMS

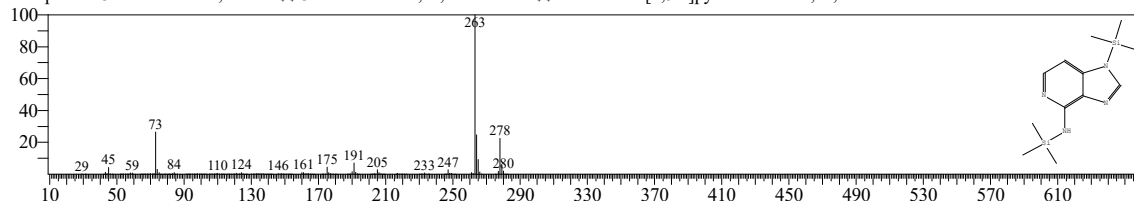

Hit#:4 Entry:137020 Library:NIST20M1.lib

SI:78 Formula:C15H22O3Si CAS:0-00-0 MolWeight:278 RetIndex:1736

CompName:6-Methoxy-2,2-dimethyl-2,3-dihydro-4H-chromen-4-one, TMS \$\$\$\$ 6-Methoxy-2,2-dimethyl-chroman-4-one, O-trimethylsilyl- \$\$\$\$ 4H-1-Benzopy

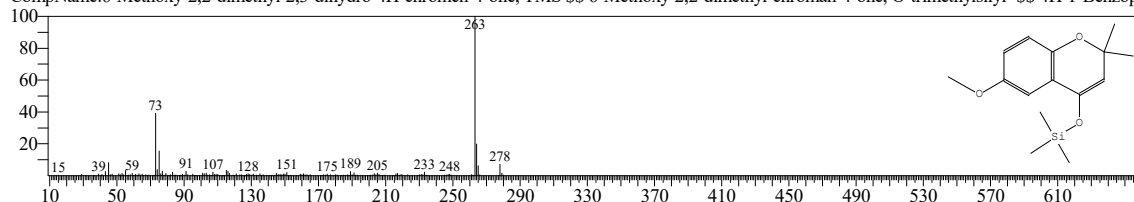

Hit#:5 Entry:136556 Library:NIST20M1.lib

SI:75 Formula:C12H22N4Si2 CAS:0-00-0 MolWeight:278 RetIndex:1606

CompName:1H,1'H-2,2'-Biimidazole, 2TMS \$\$\$\$ 1H,1'H-2,2'-Biimidazole, N,N'-bis-TMS \$\$\$\$ 1H,1'H-[2,2']Biimidazolyl, 2TMS \$\$\$\$ 2,2'-Bi-1H-imidazole, 2TMS

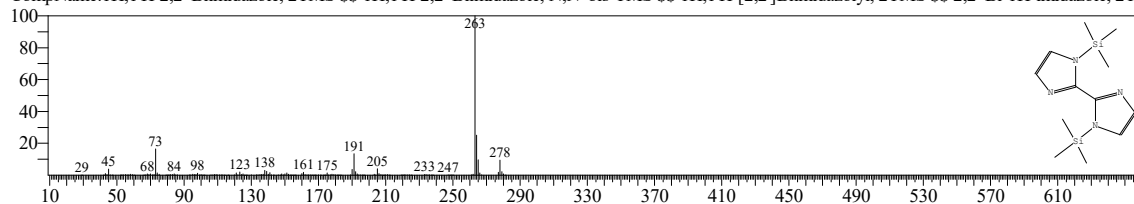

# TNAU

<< Target >>

Line#:11 R.Time:28.310(Scan#:4663) MassPeaks:383

RawMode:Averaged 28.305-28.315(4662-4664) BasePeak:73.05(7477)

BG Mode:Calc. from Peak Group 1 - Event 1 Q3 Scan

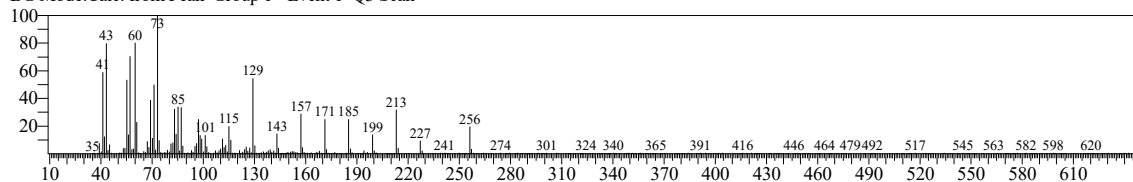

Hit#:1 Entry:31600 Library:NIST20R.lib

SI:95 Formula:C16H32O2 CAS:57-10-3 MolWeight:256 RetIndex:1968

CompName:n-Hexadecanoic acid \$ Hexadecanoic acid \$ n-Hexadecic acid \$ Palmitic acid \$ Pentadecanecarboxylic acid \$ 1-Pentadecanecarboxylic

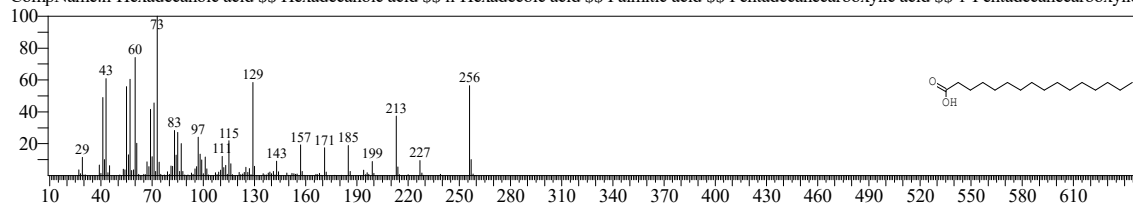

Hit#:2 Entry:29890 Library:NIST20R.lib

SI:92 Formula:C15H30O2 CAS:1002-84-2 MolWeight:242 RetIndex:1869

CompName:Pentadecanoic acid \$ Pentadecylic acid \$ n-Pentadecanoic acid \$ n-Pentadecylic acid

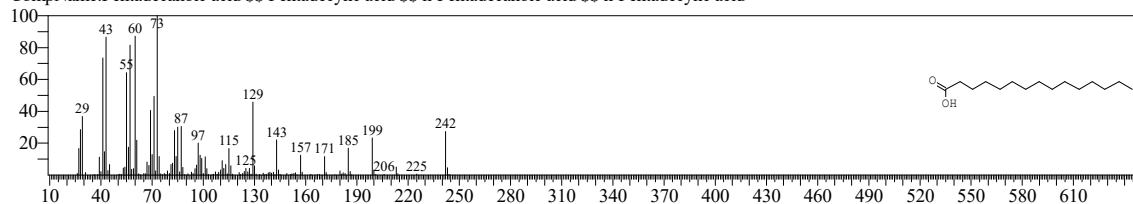

Hit#:3 Entry:44286 Library:NIST20M2.lib

SI:91 Formula:C38H68O8 CAS:28474-90-0 MolWeight:652 RetIndex:4765

CompName:l-(+)-Ascorbic acid 2,6-dihexadecanoate

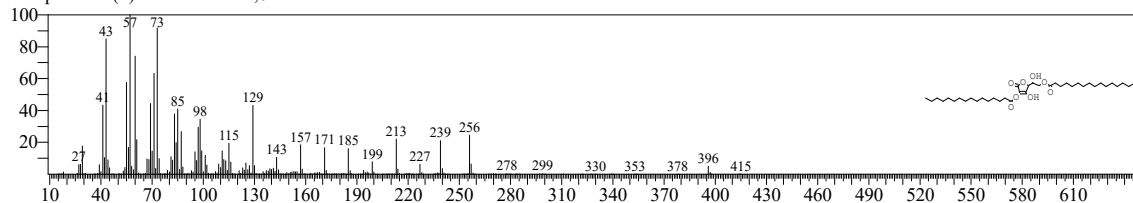

Hit#:4 Entry:144781 Library:NIST20M1.lib

SI:90 Formula:C18H36O2 CAS:57-11-4 MolWeight:284 RetIndex:2167

CompName:Octadecanoic acid \$ Stearic acid \$ n-Octadecanoic acid \$ Humko Industriene R \$ Hydrofol Acid 150 \$ Hystrene S-97 \$ Hystrene T-70 \$

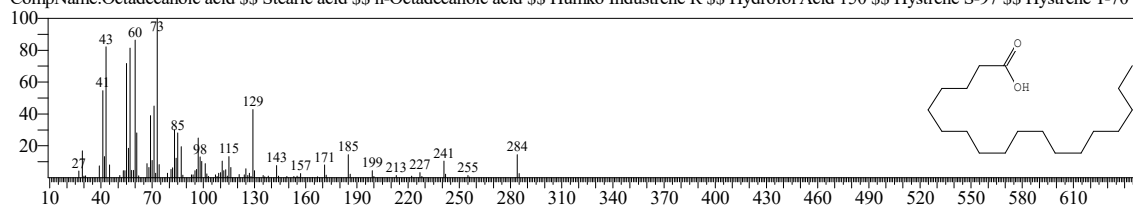

Hit#:5 Entry:36904 Library:NIST20R.lib

SI:89 Formula:C20H40O2 CAS:506-30-9 MolWeight:312 RetIndex:2366

CompName:Eicosanoic acid \$ Arachic acid \$ Arachidic acid \$ Icosanoic acid \$ n-Eicosanoic acid \$ Arachidic acid (synthetic)

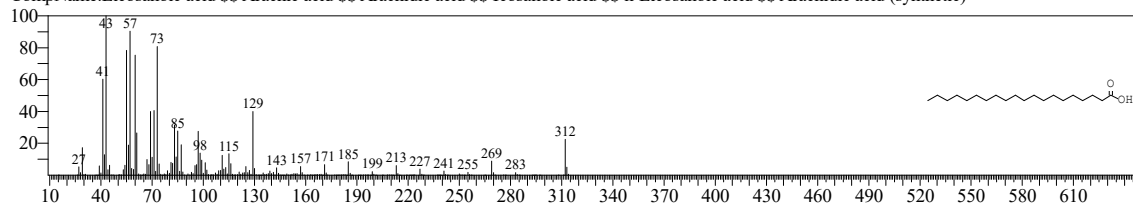

# TNAU

<< Target >>

Line#:12 R.Time:31.485(Scan#:5298) MassPeaks:362

RawMode:Averaged 31.480-31.490(5297-5299) BasePeak:67.05(5480)

BG Mode:Calc. from Peak Group 1 - Event 1 Q3 Scan

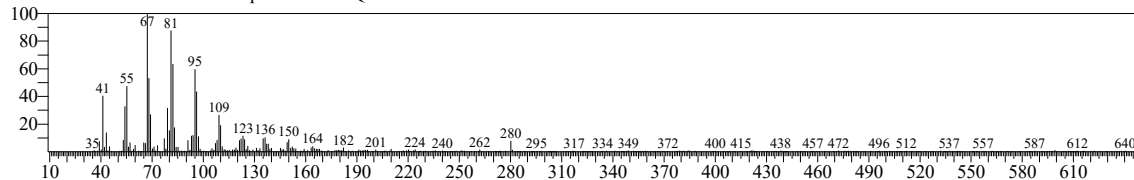

Hit#:1 Entry:139646 Library:NIST20M1.lib

SI:94 Formula:C18H32O2 CAS:2420-56-6 MolWeight:280 RetIndex:2183

CompName:10E,12Z-Octadecadienoic acid

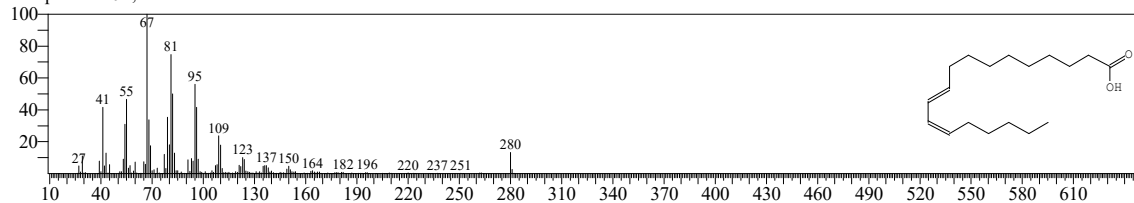

Hit#:2 Entry:34035 Library:NIST20R.lib

SI:94 Formula:C18H32O2 CAS:60-33-3 MolWeight:280 RetIndex:2183

CompName:9,12-Octadecadienoic acid (Z,Z)- \$\$ cis-9,cis-12-Octadecadienoic acid \$\$ cis,cis-Linoleic acid \$\$ Grape seed oil \$\$ Linoleic \$\$ Linoleic acid \$

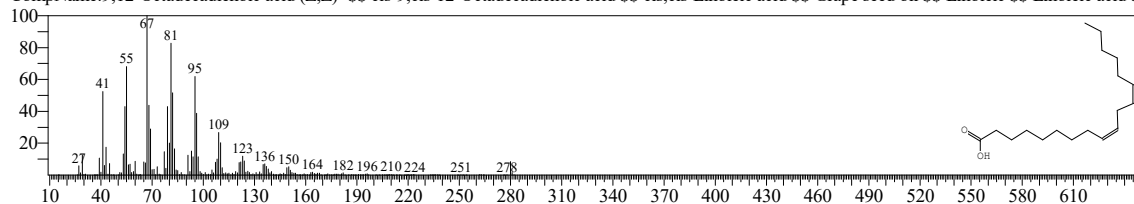

Hit#:3 Entry:139651 Library:NIST20M1.lib

SI:94 Formula:C18H32O2 CAS:544-71-8 MolWeight:280 RetIndex:2183

CompName:(9E,11E)-Octadecadienoic acid

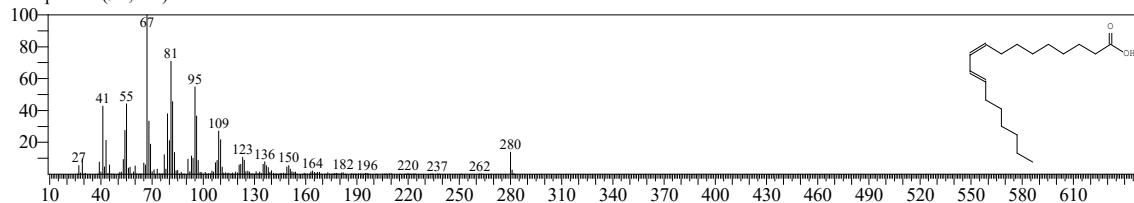

Hit#:4 Entry:139661 Library:NIST20M1.lib

SI:93 Formula:C18H32O2 CAS:506-21-8 MolWeight:280 RetIndex:2183

CompName:Linoelaidic acid

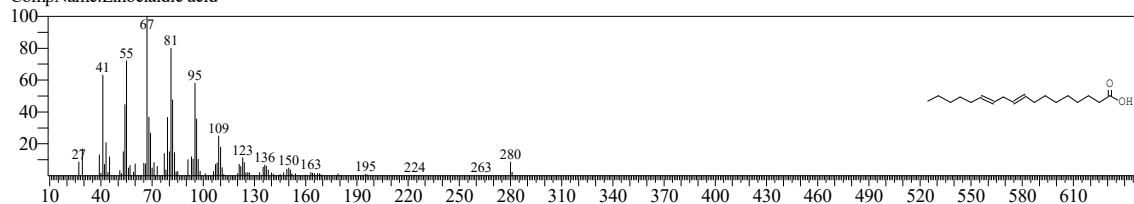

Hit#:5 Entry:173215 Library:NIST20M1.lib

SI:93 Formula:C20H36O2 CAS:2091-39-6 MolWeight:308 RetIndex:2382

CompName:11,14-Eicosadienoic acid

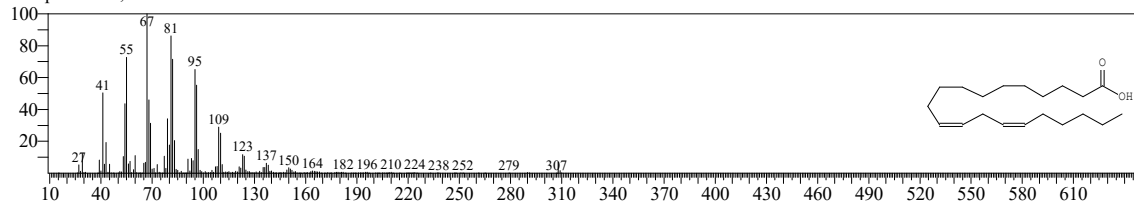

# TNAU

<< Target >>

Line#:13 R.Time:31.595(Scan#:5320) MassPeaks:373

RawMode:Averaged 31.590-31.600(5319-5321) BasePeak:55.10(2764)

BG Mode:Calc. from Peak Group 1 - Event 1 Q3 Scan

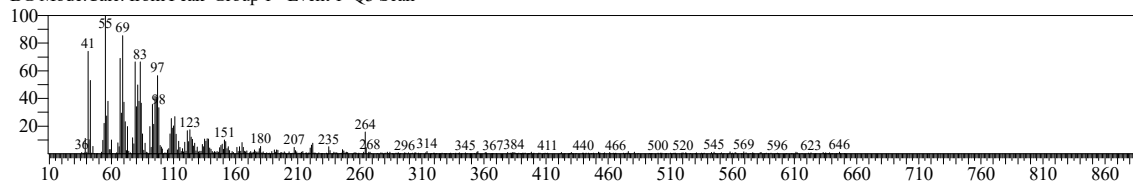

Hit#:1 Entry:92244 Library:NIST20M1.lib

SI:89 Formula:C16H30O CAS:56219-04-6 MolWeight:238 RetIndex:1808

CompName:cis-9-Hexadecenal \$ 9-Hexadecenal, (Z)- \$ (Z)-9-Hexadecenal \$ Z-9-Hexadecenal \$ (9Z)-9-Hexadecenal #

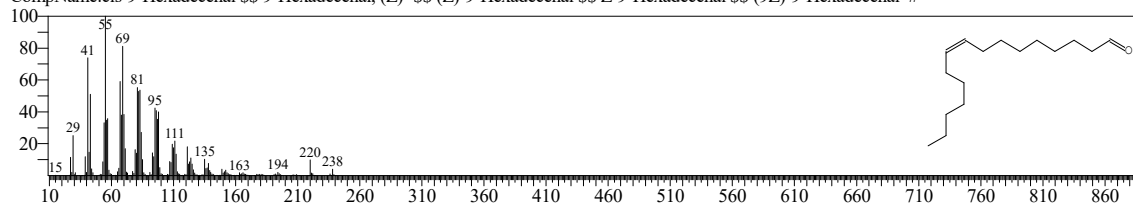

Hit#:2 Entry:46357 Library:NIST20M2.lib

SI:89 Formula:C57H104O6 CAS:537-39-3 MolWeight:884 RetIndex:6149

CompName:9-Octadecenoic acid, 1,2,3-propanetriyl ester, (E,E,E)- \$ 2,3-Bis[(9E)-9-octadecenoyloxy]propyl (9E)-9-octadecenoate #

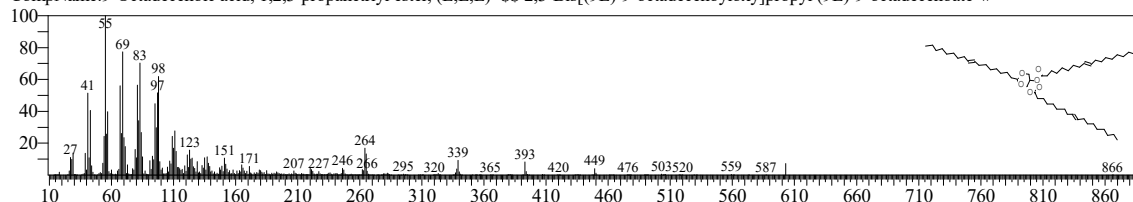

Hit#:3 Entry:156549 Library:NIST20M1.lib

SI:88 Formula:C19H34O2 CAS:0-00-0 MolWeight:294 RetIndex:2241

CompName:E,E,Z-1,3,12-Nonadecatriene-5,14-diol \$ (3E,12Z)-1,3,12-Nonadecatriene-5,14-diol #

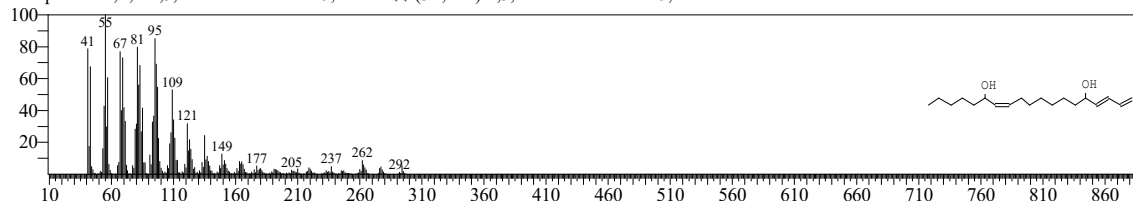

Hit#:4 Entry:123421 Library:NIST20M1.lib

SI:88 Formula:C18H34O CAS:2423-10-1 MolWeight:266 RetIndex:2007

CompName:9-Octadecenal, (Z)- \$ Olealdehyde \$ cis-9-Octadecenal \$ Oleylaldehyde \$ Z-9-Octadecenal \$ (9Z)-9-Octadecenal #

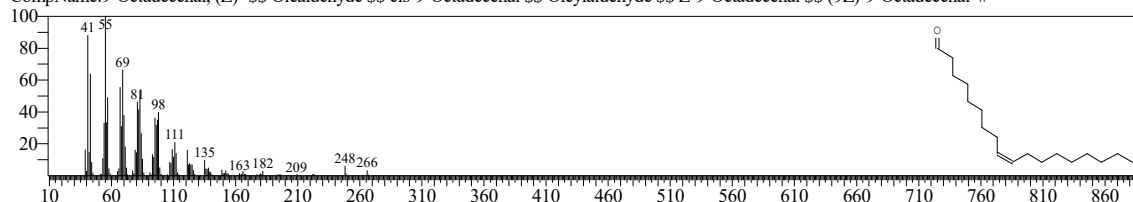

Hit#:5 Entry:24861 Library:NIST20R.lib

SI:88 Formula:C14H26O CAS:53939-27-8 MolWeight:210 RetIndex:1609

CompName:9-Tetradecenal, (Z)- \$ (Z)-9-Tetradecenal \$ Z-9-Tetradecenal \$ (9Z)-9-Tetradecenal \$ (Z)-9-Tetradecen-1-al \$ 9-Tetradecenal, (9Z)- \$ (Z)-9-Tetradecenal #

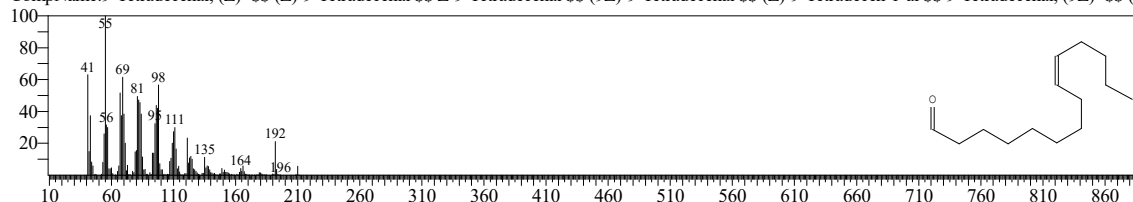

# TNAU

<< Target >>

Line#:14 R.Time:32.040(Scan#:5409) MassPeaks:377

RawMode:Averaged 32.035-32.045(5408-5410) BasePeak:73.05(807)

BG Mode:Calc. from Peak Group 1 - Event 1 Q3 Scan

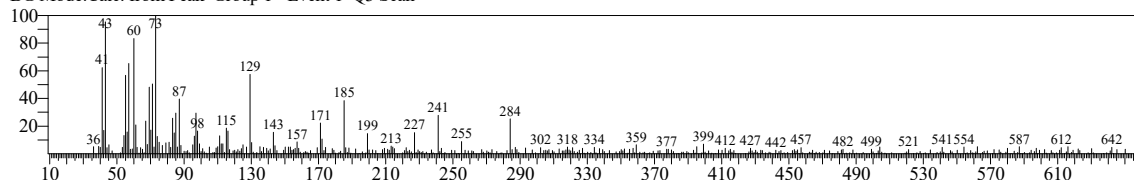

Hit#:1 Entry:34462 Library:NIST20R.lib

SI:90 Formula:C18H36O2 CAS:57-11-4 MolWeight:284 RetIndex:2167

CompName:Octadecanoic acid \$\$ Stearic acid \$\$ n-Octadecanoic acid \$\$ Humko Industriene R \$\$ Hydrofol Acid 150 \$\$ Hystrene S-97 \$\$ Hystrene T-70 \$

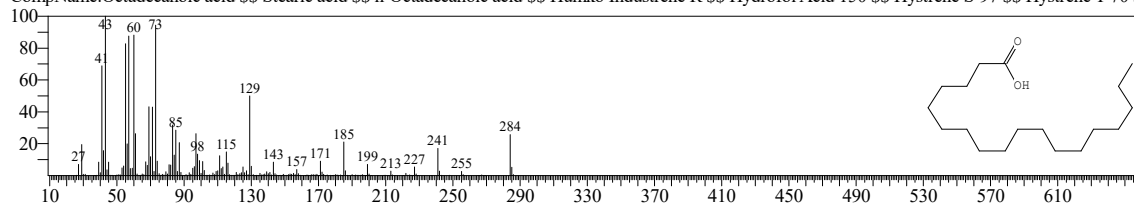

Hit#:2 Entry:29890 Library:NIST20R.lib

SI:88 Formula:C15H30O2 CAS:1002-84-2 MolWeight:242 RetIndex:1869

CompName:Pentadecanoic acid \$\$ Pentadecylic acid \$\$ n-Pentadecanoic acid \$\$ n-Pentadecylic acid

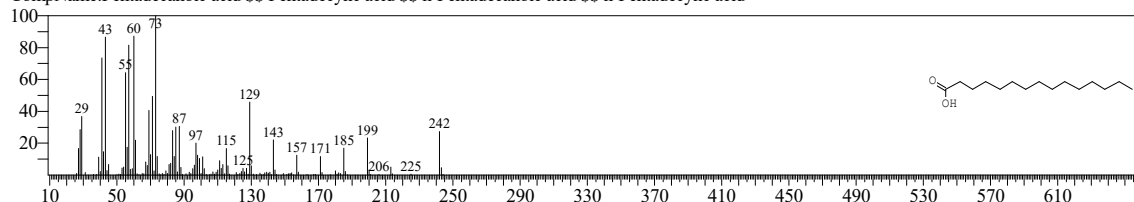

Hit#:3 Entry:81713 Library:NIST20M1.lib

SI:86 Formula:C14H28O2 CAS:544-63-8 MolWeight:228 RetIndex:1769

CompName:Tetradecanoic acid \$\$ Myristic acid \$\$ n-Tetradecanoic acid \$\$ n-Tetradecoic acid \$\$ Neo-Fat 14 \$\$ Univol U 316S \$\$ 1-Tridecanecarboxylic ;

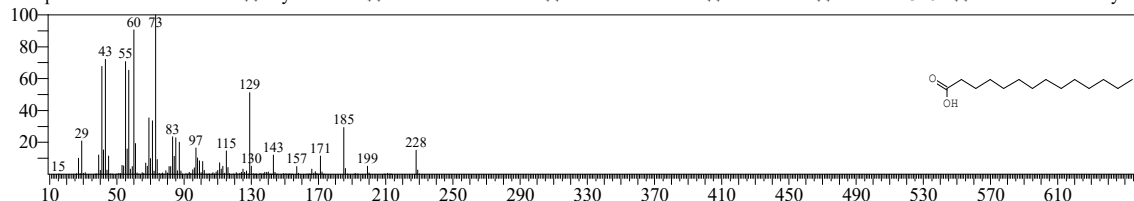

Hit#:4 Entry:36904 Library:NIST20R.lib

SI:85 Formula:C20H40O2 CAS:506-30-9 MolWeight:312 RetIndex:2366

CompName:Eicosanoic acid \$\$ Arachic acid \$\$ Arachidic acid \$\$ Icosanoic acid \$\$ n-Eicosanoic acid \$\$ Arachidic acid (synthetic)

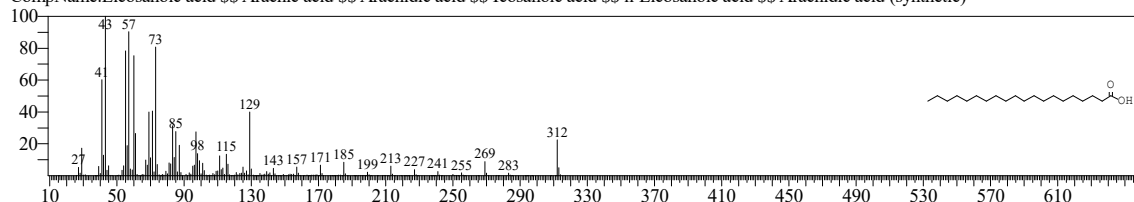

Hit#:5 Entry:25643 Library:NIST20R.lib

SI:85 Formula:C13H26O2 CAS:638-53-9 MolWeight:214 RetIndex:1670

CompName:Tridecanoic acid \$\$ n-Tridecanoic acid \$\$ n-Tridecoic acid \$\$ Tridecylic acid

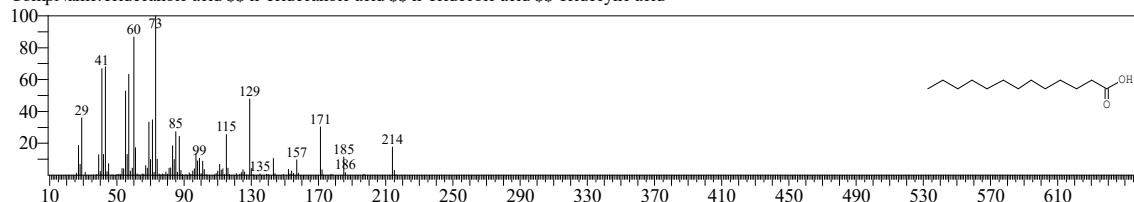

# TNAU

<< Target >>

Line#:15 R.Time:44.775(Scan#:7956) MassPeaks:380

RawMode:Averaged 44.770-44.780(7955-7957) BasePeak:69.10(1266)

BG Mode:Calc. from Peak Group 1 - Event 1 Q3 Scan

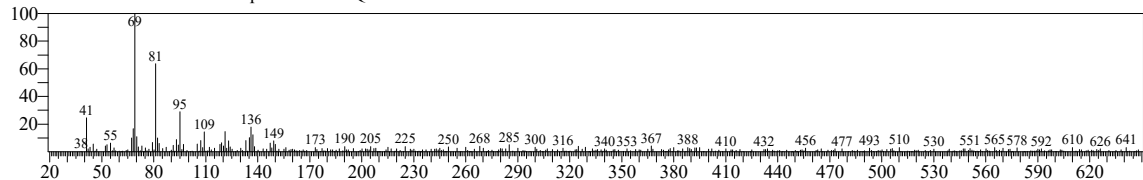

Hit#:1 Entry:6116 Library:NIST20M2.lib

SI:82 Formula:C30H50 CAS:111-02-4 MolWeight:410 RetIndex:2914

CompName:Squalene \$\$ 2,6,10,14,18,22-Tetracosahexaene, 2,6,10,15,19,23-hexamethyl-, (all-E)- \$\$ all-trans-Squalene \$\$ trans-Squalene \$\$ Spinacene \$\$ S

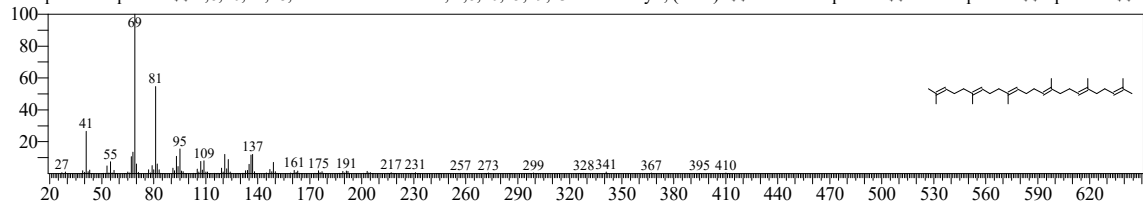

Hit#:2 Entry:201288 Library:NIST20M1.lib

SI:82 Formula:C22H36O2 CAS:0-00-0 MolWeight:332 RetIndex:2505

CompName:5,9,13,17-Tetramethyl 4,8,12,16-octadecatetraenoic acid

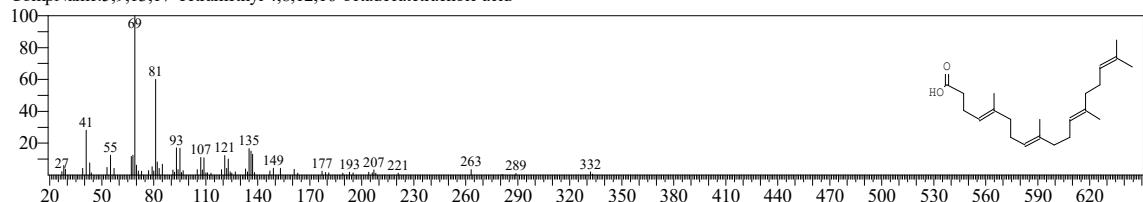

Hit#:3 Entry:212569 Library:NIST20M1.lib

SI:81 Formula:C25H42 CAS:75581-03-2 MolWeight:342 RetIndex:2432

CompName:2,6,10,14,18-Pentamethyl-2,6,10,14,18-icosapentaene \$\$ (6E,10E,14E,18E)-2,6,10,14,18-Pentamethyl-2,6,10,14,18-icosapentaene #

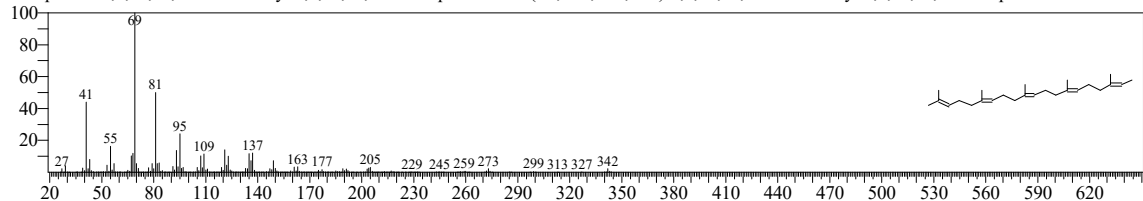

Hit#:4 Entry:21778 Library:NIST20M2.lib

SI:81 Formula:C30H54O2 CAS:0-00-0 MolWeight:446 RetIndex:3127

CompName:2,6,10,15,19,23-Pentamethyl-2,6,18,22-tetracosatetraen-10,15-diol

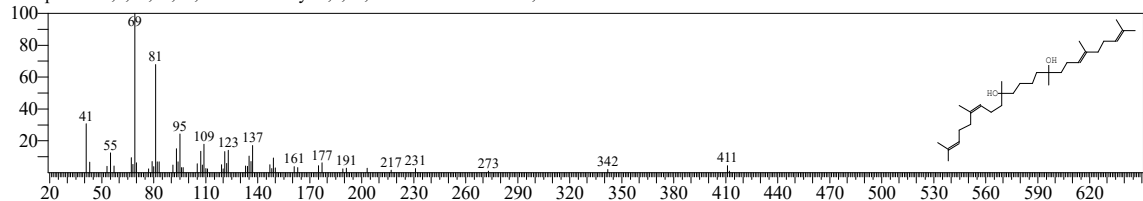

Hit#:5 Entry:6115 Library:NIST20M2.lib

SI:80 Formula:C30H50 CAS:7683-64-9 MolWeight:410 RetIndex:2914

CompName:Supraene \$\$ 2,6,10,14,18,22-Tetracosahexaene, 2,6,10,15,19,23-hexamethyl-, (all-E)- \$\$ Spinacene \$\$ 2,6,10,15,19,23-Hexamethyl-2,6,10,14,18,22-tet

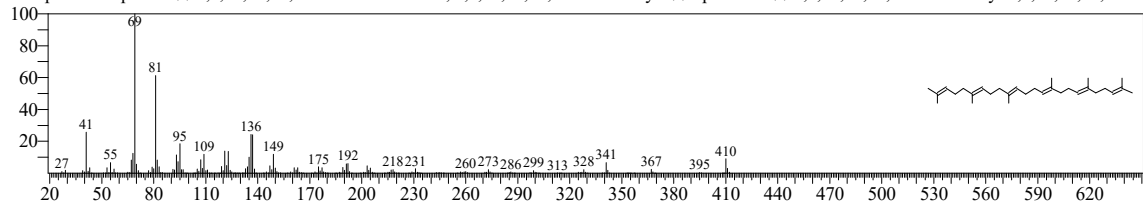



# TNAU

<< Target >>

Line#:16 R.Time:45.625(Scan#:8126) MassPeaks:434

RawMode:Averaged 45.620-45.630(8125-8127) BasePeak:139.10(6808)

BG Mode:Calc. from Peak Group 1 - Event 1 Q3 Scan

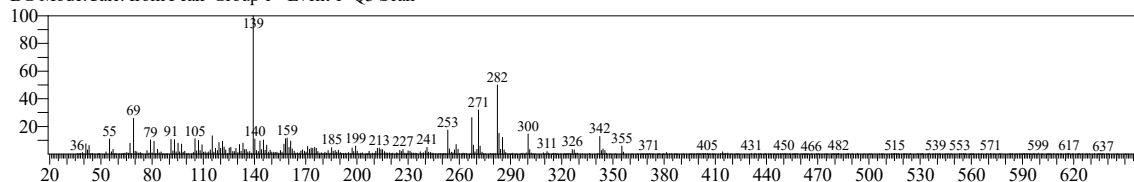

Hit#:1 Entry:8297 Library:NIST20M2.lib

SI:89 Formula:C27H42O3 CAS:512-04-9 MolWeight:414 RetIndex:2844

CompName:Diosgenin \$\$ Spirost-5-en-3-ol, (3.beta.,25R)- \$\$ Spirost-5-en-3.beta.-ol, (25R)- \$\$ Nitrogenin \$\$ 25D-spirost-5-en-3.beta.-ol \$\$ Spiro(8H-nap

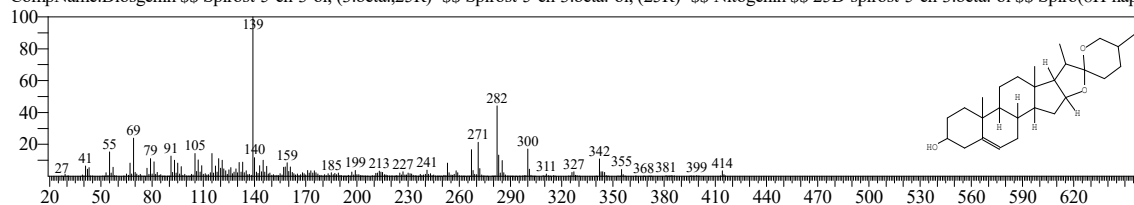

Hit#:2 Entry:14852 Library:NIST20M2.lib

SI:81 Formula:C28H44O3 CAS:116292-24-1 MolWeight:428 RetIndex:2793

CompName:Diosgenin methyl ether \$\$ Diosgenin Me derivative \$\$ (3.beta.,25R)-3-Methoxyspirost-5-ene \$\$ Spirost-5-ene, 3-methoxy-, (3.beta.,25R)-

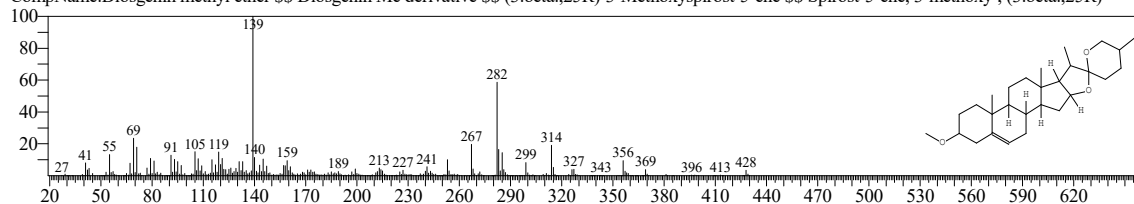

Hit#:3 Entry:41561 Library:NIST20R.lib

SI:80 Formula:C27H42O2 CAS:32277-73-9 MolWeight:398 RetIndex:2713

CompName:Des-N-solasodine \$\$ Furosta-5,20(22)-dien-3-ol #

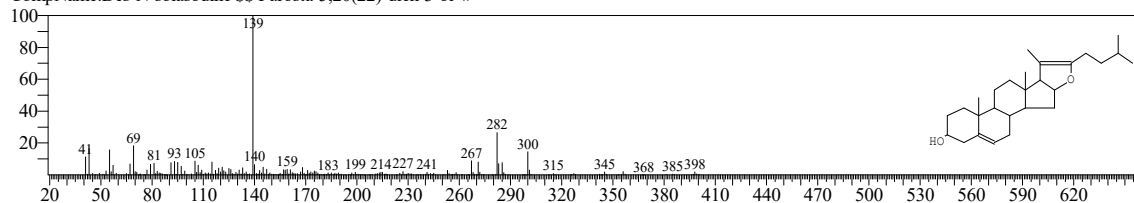

Hit#:4 Entry:24878 Library:NIST20M2.lib

SI:79 Formula:C29H44O4 CAS:1061-54-7 MolWeight:456 RetIndex:2984

CompName:Spirost-5-en-3-ol, acetate, (3.beta.,25R)- \$\$ Diosgenin acetate \$\$ Spirost-5-en-3.beta.-ol, acetate, (25R)- \$\$ Spirost-5-en-3.beta.-ol, acetate, (25R)-

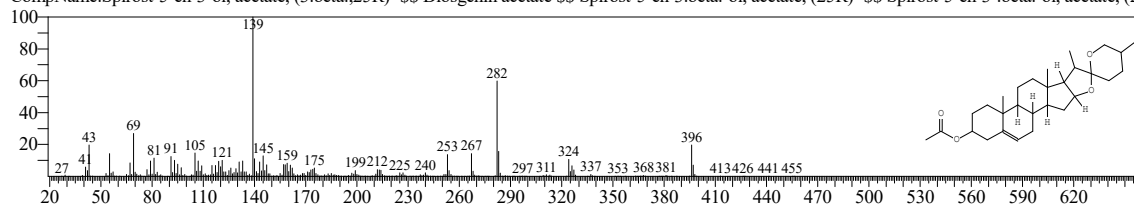

Hit#:5 Entry:42677 Library:NIST20R.lib

SI:73 Formula:C29H44O4 CAS:1180-12-7 MolWeight:456 RetIndex:2984

CompName:Neodiosgenin (3.beta.,25S) acetate \$\$ Spirost-5-en-3-ol, 3-acetate, (3.beta.,25S)- \$\$ Spirost-5-en-3-ol, acetate, (3.beta.,25S)- \$\$ Spirost-5-en-3-ol, acetate, (3.beta.,25S)-

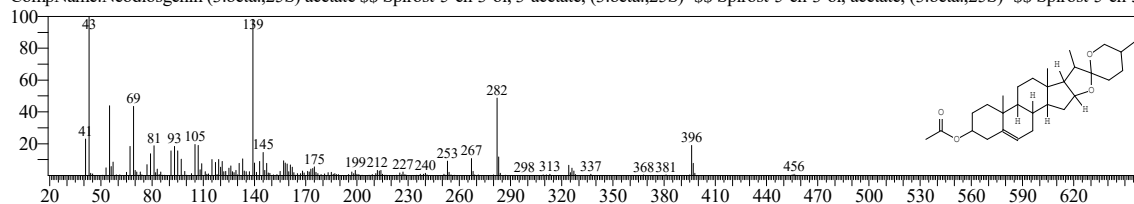

Supplement: Supplementary file 49 [file supplementary]
