# Supplementary material for: Comparative Metabolomics Profiling Reveals Key Metabolites and Associated Pathways Regulating Tuber Dormancy in White Yam (<em>Dioscorea rotundata</em>)
Source: Preprints.org preprint supplement (doi:10.20944/preprints202303.0378.v1), 2023-03-21

# TNAU

## Sample Information

Analyzed by : Admin  
 Analyzed : 05-Aug-22 11:44:34 AM  
 Sample Type : Unknown  
 Level # : 1  
 Sample Name : T87-3  
 Sample ID : T87-3  
 IS Amount : [1]=1  
 Sample Amount : 1  
 Dilution Factor : 1  
 Vial # : 29  
 Injection Volume : 1.00  
 Data File : D:\GCMS-8040NX\Aug 2022\Users\04.08.2022\Data files\04082022-030.qgd  
 Org Data File : D:\GCMS-8040NX\Aug 2022\Users\04.08.2022\Data files\04082022-030.qgd  
 Method File : D:\GCMS-8040NX\Aug 2022\Users\04.08.2022\Method file\27072022\_methodfile.qgm  
 Org Method File : D:\GCMS-8040NX\Aug 2022\Users\04.08.2022\Method file\27072022\_methodfile.qgm  
 Report File :  
 Tuning File : D:\GCMS-8040NX\Aug 2022\Tuning Data\TUNING 04082022.qgt  
 [Comment]  
 Jerry samples  
 Modified by : Admin  
 Modified : 05-Aug-22 4:46:22 PM

Chromatogram T87-3 D:\GCMS-8040NX\Aug 2022\Users\04.08.2022\Data files\04082022-030.qgd

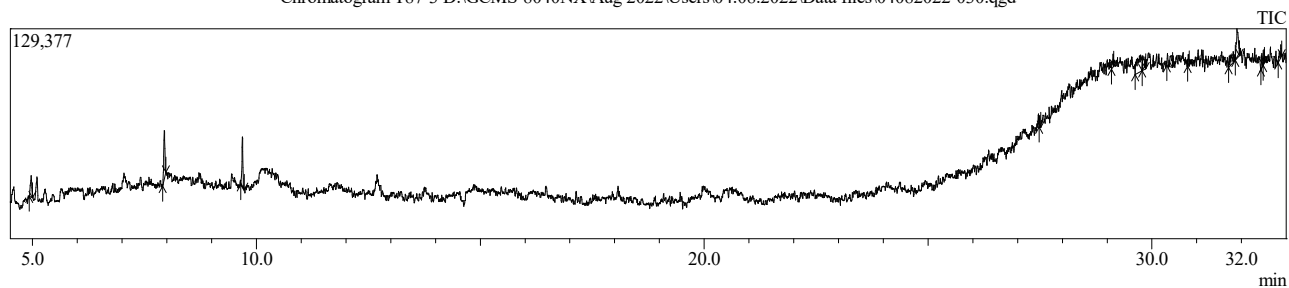

Peak Report TIC

| Peak# | R.Time | Area   | Area%  | Height | Height% | A/H  | Similarity | Name                                        |
|-------|--------|--------|--------|--------|---------|------|------------|---------------------------------------------|
| 1     | 4.968  | 27629  | 6.82   | 13185  | 7.77    | 2.10 | 72         | 2-Propanol, 1,1'-oxybis-                    |
| 2     | 7.942  | 54245  | 13.39  | 30116  | 17.74   | 1.80 | 91         | Undecane                                    |
| 3     | 9.687  | 47882  | 11.82  | 30795  | 18.14   | 1.55 | 93         | Undecane                                    |
| 4     | 27.493 | 7187   | 1.77   | 7273   | 4.28    | 0.99 | 37         | 4-Hydroxybenzoic acid-2TMS                  |
| 5     | 29.133 | 12852  | 3.17   | 7943   | 4.68    | 1.62 | 36         | 3-Hydroxyanthranilic acid-2TMS              |
| 6     | 29.635 | 70929  | 17.51  | 7655   | 4.51    | 9.27 | 33         | 4-Aminobenzoic acid-2TMS                    |
| 7     | 29.800 | 24506  | 6.05   | 8910   | 5.25    | 2.75 | 41         | 3,4-Dihydroxymandelic acid-4TMS             |
| 8     | 30.345 | 29493  | 7.28   | 7691   | 4.53    | 3.83 | 45         | 4-Aminobenzoic acid-2TMS                    |
| 9     | 30.812 | 7009   | 1.73   | 7307   | 4.30    | 0.96 | 32         | Hypoxanthine-2TMS                           |
| 10    | 31.725 | 30366  | 7.50   | 6718   | 3.96    | 4.52 | 32         | 4-Aminobenzoic acid-2TMS                    |
| 11    | 31.901 | 55206  | 13.63  | 18162  | 10.70   | 3.04 | 33         | Methyl cis-4,7,10,13,16,19-Docosahexaenoate |
| 12    | 32.450 | 13861  | 3.42   | 7734   | 4.56    | 1.79 | 32         | 3-(3-Hydroxyphenyl)-3-hydroxypropionic acid |
| 13    | 32.504 | 8700   | 2.15   | 8536   | 5.03    | 1.02 | 32         | Epinephrine-3TMS                            |
| 14    | 32.880 | 15211  | 3.76   | 7743   | 4.56    | 1.96 | 44         | 3,4-Dihydroxymandelic acid-4TMS             |
|       |        | 405076 | 100.00 | 169768 | 100.00  |      |            |                                             |

Library

# TNAU

<< Target >>

Line#:1 R.Time:4.970(Scan#:95) MassPeaks:268

RawMode:Averaged 4.965-4.975(94-96) BasePeak:89.05(3163)

BG Mode:Calc. from Peak Group 1 - Event 1 Q3 Scan

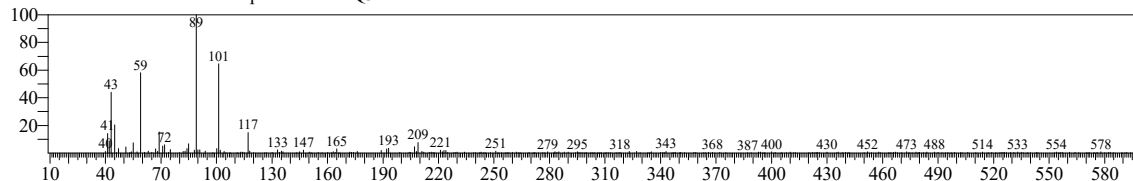

Hit#:1 Entry:7425 Library:NIST20R.lib

SI:72 Formula:C6H14O3 CAS:110-98-5 MolWeight:134 RetIndex:1018

CompName:2-Propanol, 1,1'-oxybis- CC(C)OCCOC(C)C 2-Propanol, 1,1'-oxydi- CC(C)OCCOC(C)C Bis(2-hydroxypropyl) ether CC(C)OCCOC(C)C 1,1'-Oxydi-2-propanol CC(C)OCCOC(C)C 2,2'-Dihydroxydipropyl ether CC(C)OCCOC(C)C

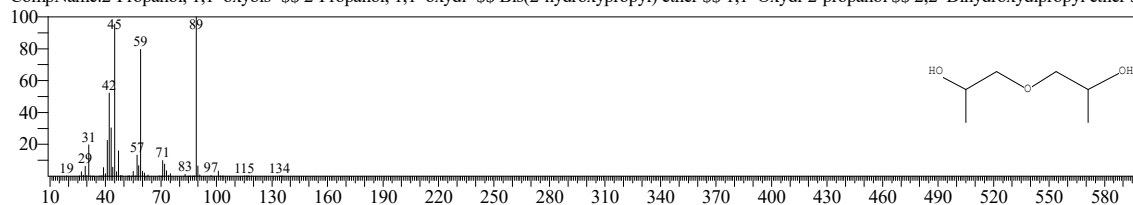

Hit#:2 Entry:16032 Library:NIST20M1.lib

SI:71 Formula:C7H16O3 CAS:6607-66-5 MolWeight:148 RetIndex:860

CompName:1,3,3-Trimethoxybutane CC(C)(OC)COC Butane, 1,3,3-trimethoxy-

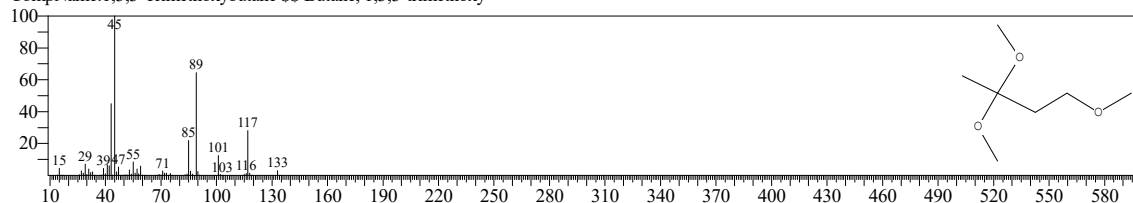

Hit#:3 Entry:22897 Library:NIST20M1.lib

SI:71 Formula:C8H16O3 CAS:0-00-0 MolWeight:160 RetIndex:931

CompName:2-Hydroxyisocaproic acid, methyl ether, methyl ester CC(C)C(C)C(=O)OC

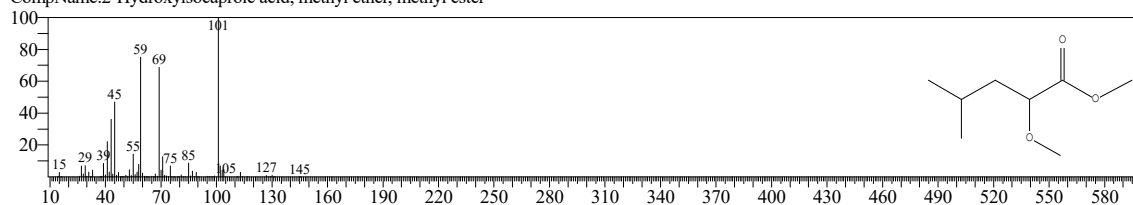

Hit#:4 Entry:9789 Library:NIST20M1.lib

SI:70 Formula:C6H14O3 CAS:0-00-0 MolWeight:134 RetIndex:1018

CompName:Dipropylene glycol (isomer 1) CC(C)OCCOC(C)C 2-Propanol, 1,1'-oxybis-

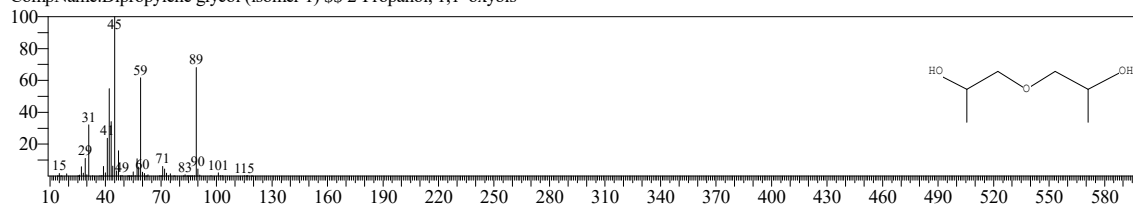

Hit#:5 Entry:1 Library:FA\_ME\_SP2560\_EI\_V3.lib

SI:53 Formula:C5H10O2 CAS:107-92-6 MolWeight:102 RetIndex:1113

CompName:Methyl butanoate ; Butanoic acid CCCC(=O)OC

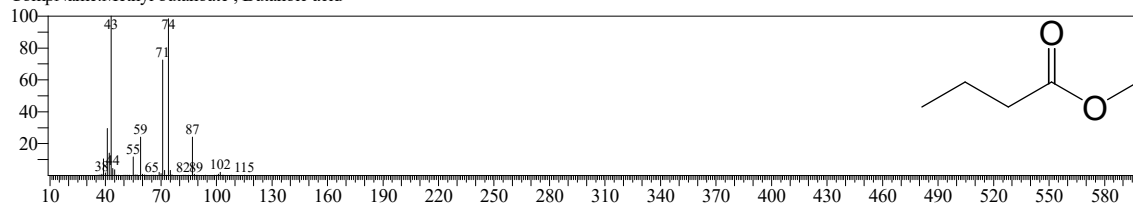

# TNAU

<< Target >>

Line#:2 R.Time:7.940(Scan#:689) MassPeaks:254

RawMode:Averaged 7.935-7.945(688-690) BasePeak:57.10(7657)

BG Mode:Calc. from Peak Group 1 - Event 1 Q3 Scan

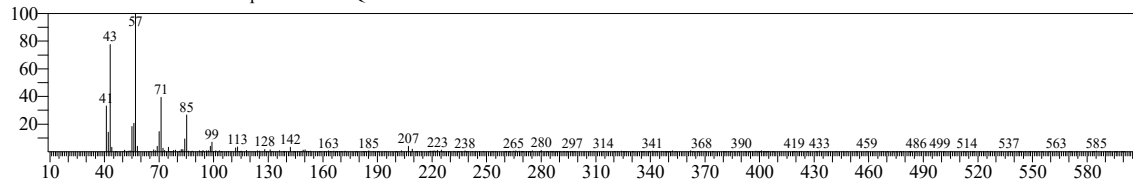

Hit#:1 Entry:21042 Library:NIST20M1.lib

SI:91 Formula:C<sub>11</sub>H<sub>24</sub> CAS:1120-21-4 MolWeight:156 RetIndex:1100

CompName:Undecane \$\$ n-Undecane \$\$ Hendecane \$\$ n-C<sub>11</sub>H<sub>24</sub> \$\$ UN 2330

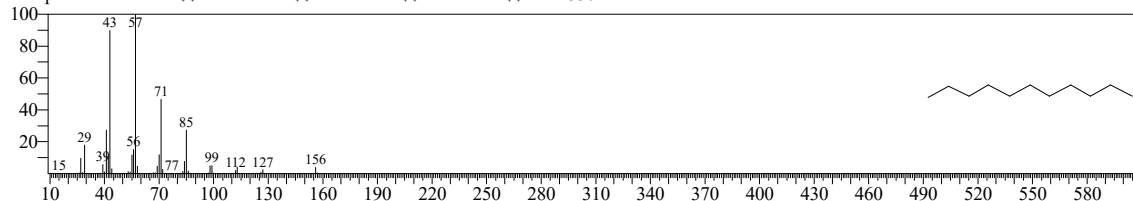

Hit#:2 Entry:40226 Library:NIST20M1.lib

SI:91 Formula:C<sub>13</sub>H<sub>28</sub> CAS:629-50-5 MolWeight:184 RetIndex:1300

CompName:Tridecane \$\$ n-Tridecane \$\$ Tridecane, n-

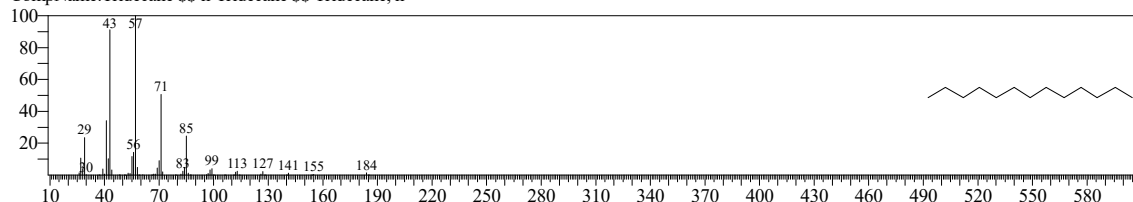

Hit#:3 Entry:9445 Library:NIST20R.lib

SI:91 Formula:C<sub>10</sub>H<sub>22</sub> CAS:124-18-5 MolWeight:142 RetIndex:1000

CompName:Decane \$\$ n-Decane \$\$ n-C<sub>10</sub>H<sub>22</sub> \$\$ UN 2247

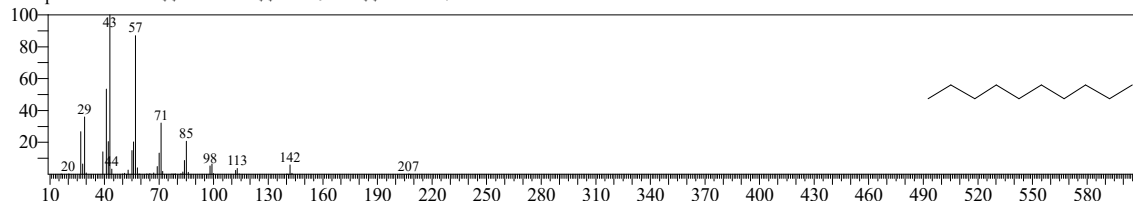

Hit#:4 Entry:30057 Library:NIST20M1.lib

SI:90 Formula:C<sub>12</sub>H<sub>26</sub> CAS:112-40-3 MolWeight:170 RetIndex:1200

CompName:Dodecane \$\$ n-Dodecane \$\$ Adakane 12 \$\$ Ba 51-090453 \$\$ CH<sub>3</sub>(CH<sub>2</sub>)<sub>10</sub>CH<sub>3</sub> \$\$ Bihexyl \$\$ Dihexyl \$\$ Duodecane \$\$ NSC 8714

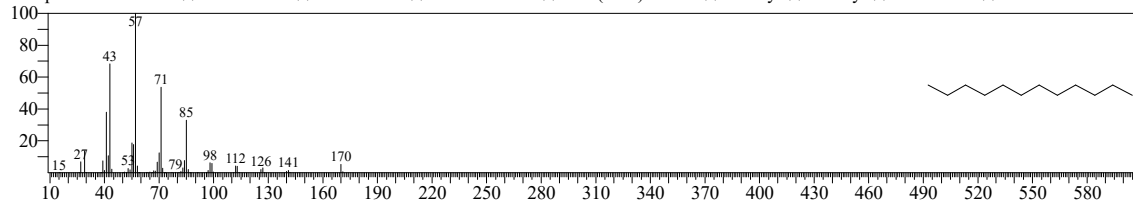

Hit#:5 Entry:27737 Library:NIST20R.lib

SI:90 Formula:C<sub>16</sub>H<sub>34</sub> CAS:544-76-3 MolWeight:226 RetIndex:1600

CompName:Hexadecane \$\$ n-Cetane \$\$ n-Hexadecane \$\$ Cetane

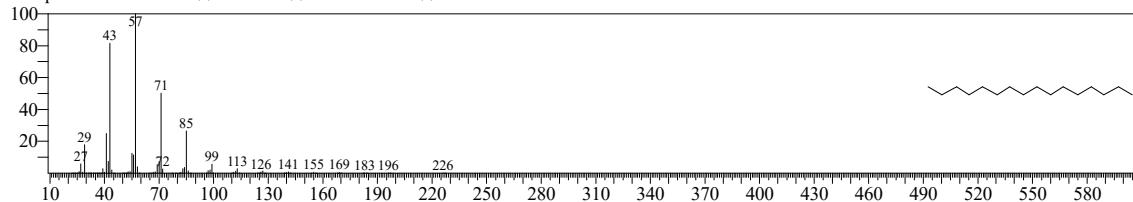

# TNAU

<< Target >>

Line#:3 R.Time:9.685(Scan#:1038) MassPeaks:299

RawMode:Averaged 9.680-9.690(1037-1039) BasePeak:57.05(6848)

BG Mode:Calc. from Peak Group 1 - Event 1 Q3 Scan

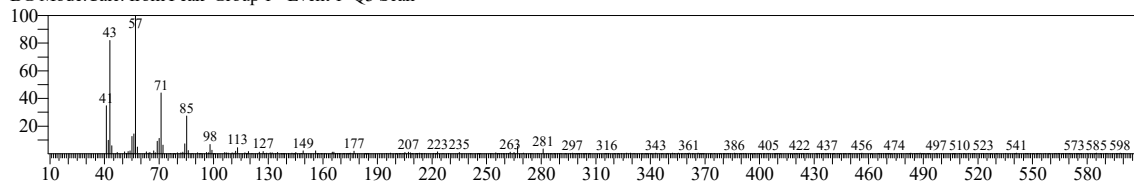

Hit#:1 Entry:21042 Library:NIST20M1.lib

SI:93 Formula:C<sub>11</sub>H<sub>24</sub> CAS:1120-21-4 MolWeight:156 RetIndex:1100

CompName:Undecane \$\$ n-Undecane \$\$ Hendecane \$\$ n-C<sub>11</sub>H<sub>24</sub> \$\$ UN 2330

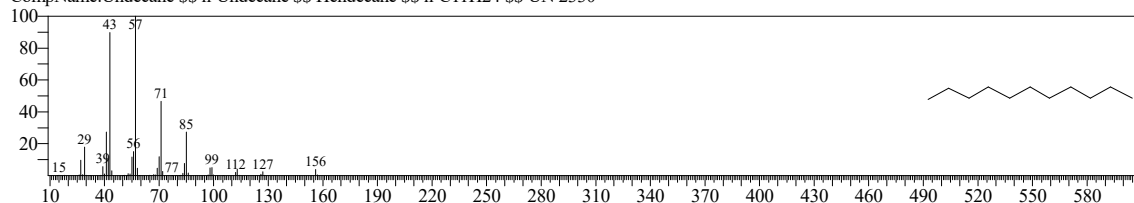

Hit#:2 Entry:40226 Library:NIST20M1.lib

SI:92 Formula:C<sub>13</sub>H<sub>28</sub> CAS:629-50-5 MolWeight:184 RetIndex:1300

CompName:Tridecane \$\$ n-Tridecane \$\$ Tridecane, n-

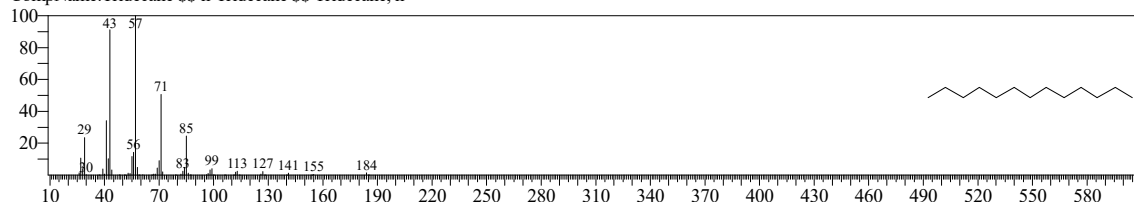

Hit#:3 Entry:27737 Library:NIST20R.lib

SI:91 Formula:C<sub>16</sub>H<sub>34</sub> CAS:544-76-3 MolWeight:226 RetIndex:1600

CompName:Hexadecane \$\$ n-Cetane \$\$ n-Hexadecane \$\$ Cetane

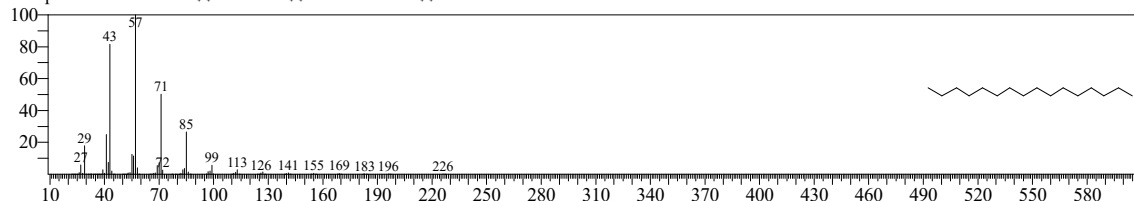

Hit#:4 Entry:16192 Library:NIST20R.lib

SI:91 Formula:C<sub>12</sub>H<sub>26</sub> CAS:112-40-3 MolWeight:170 RetIndex:1200

CompName:Dodecane \$\$ n-Dodecane \$\$ Adakane 12 \$\$ Ba 51-090453 \$\$ CH<sub>3</sub>(CH<sub>2</sub>)<sub>10</sub>CH<sub>3</sub> \$\$ Bihexyl \$\$ Dihexyl \$\$ Duodecane \$\$ NSC 8714

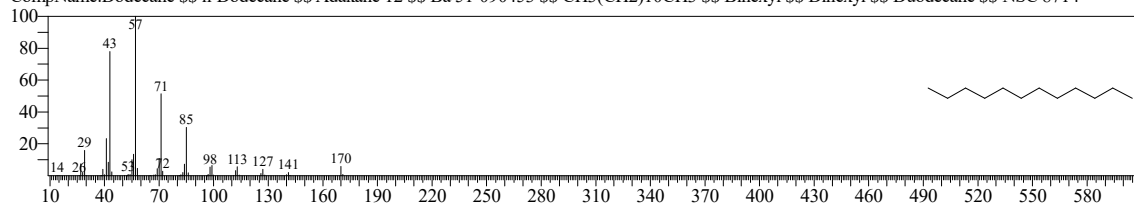

Hit#:5 Entry:25293 Library:NIST20R.lib

SI:90 Formula:C<sub>15</sub>H<sub>32</sub> CAS:629-62-9 MolWeight:212 RetIndex:1500

CompName:Pentadecane \$\$ n-Pentadecane \$\$ CH<sub>3</sub>(CH<sub>2</sub>)<sub>13</sub>CH<sub>3</sub>

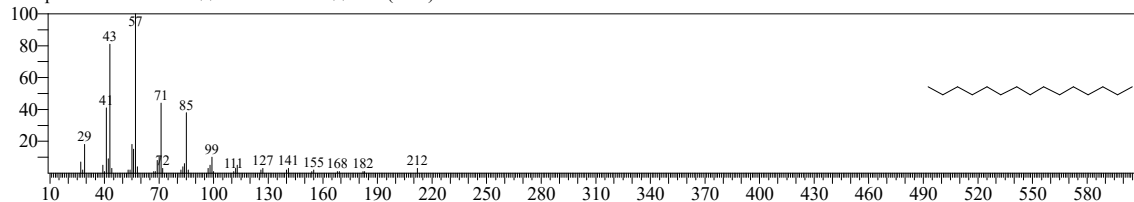

# TNAU

<< Target >>

Line#:4 R.Time:27.495(Scan#:4600) MassPeaks:297

RawMode:Averaged 27.490-27.500(4599-4601) BasePeak:44.00(893)

BG Mode:Calc. from Peak Group 1 - Event 1 Q3 Scan

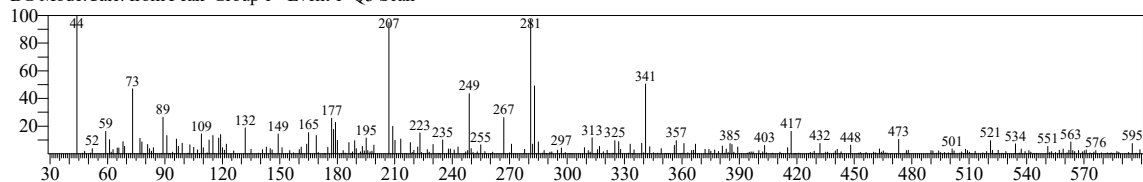

Hit#:1 Entry:211 Library:OA\_TMS\_DB5\_67min\_V3.lib

SI:37 Formula:C13H22O3Si2 CAS:99-96-7 MolWeight:282 RetIndex:1636

CompName:4-Hydroxybenzoic acid-2TMS ; 4-hydroxybenzoic acid

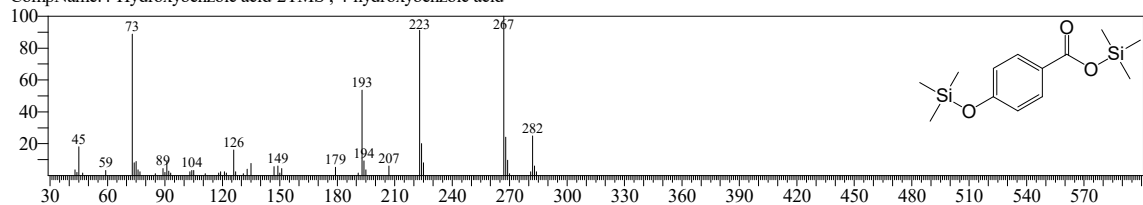

Hit#:2 Entry:328 Library:OA\_TMS\_DB5\_67min\_V3.lib

SI:36 Formula:C13H23NO2Si2 CAS:150-13-0 MolWeight:281 RetIndex:1845

CompName:4-Aminobenzoic acid-2TMS ; 4-aminobenzoic acid

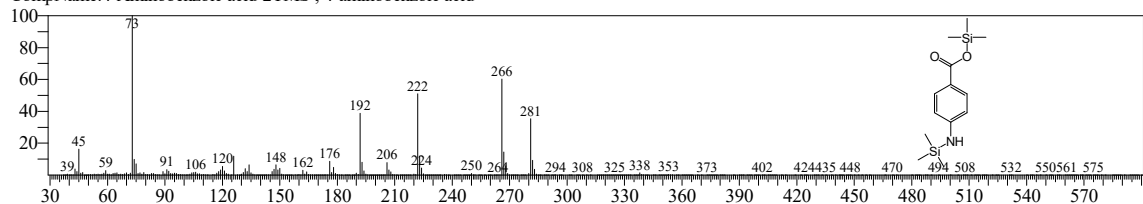

Hit#:3 Entry:294 Library:OA\_TMS\_DB5\_67min\_V3.lib

SI:36 Formula:C15H26O4Si2 CAS:306-08-1 MolWeight:326 RetIndex:1782

CompName:Homovanillic acid-2TMS ; 2-(4-hydroxy-3-methoxyphenyl)acetic acid

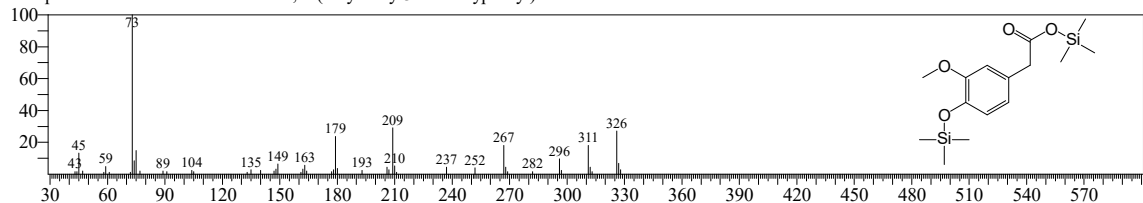

Hit#:4 Entry:179 Library:OA\_TMS\_DB5\_67min\_V3.lib

SI:35 Formula:C13H22O3Si2 CAS:99-06-9 MolWeight:282 RetIndex:1572

CompName:3-Hydroxybenzoic acid-2TMS ; 3-hydroxybenzoic acid

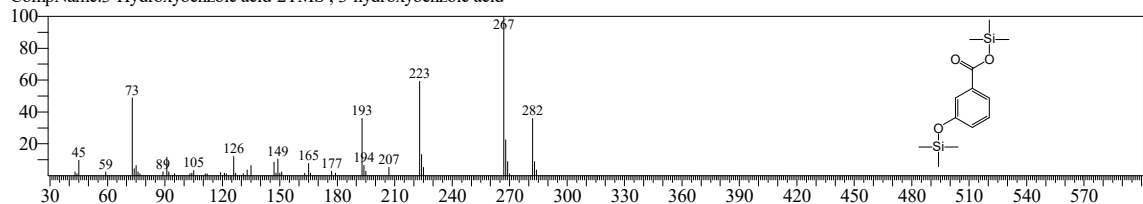

Hit#:5 Entry:461 Library:OA\_TMS\_DB5\_67min\_V3.lib

SI:35 Formula:C20H37NO4Si3 CAS:537-55-3 MolWeight:439 RetIndex:2119

CompName:N-Acetyltyrosine-3TMS ; (2S)-2-acetamido-3-(4-hydroxyphenyl)propanoic acid

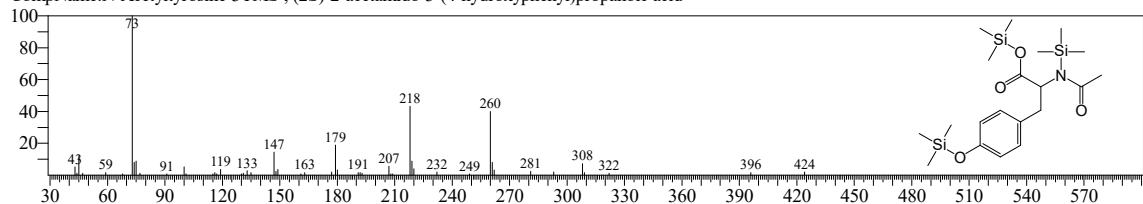

# TNAU

<< Target >>

Line#:5 R.Time:29.135(Scan#:4928) MassPeaks:324

RawMode:Averaged 29.130-29.140(4927-4929) BasePeak:207.05(1146)

BG Mode:Calc. from Peak Group 1 - Event 1 Q3 Scan

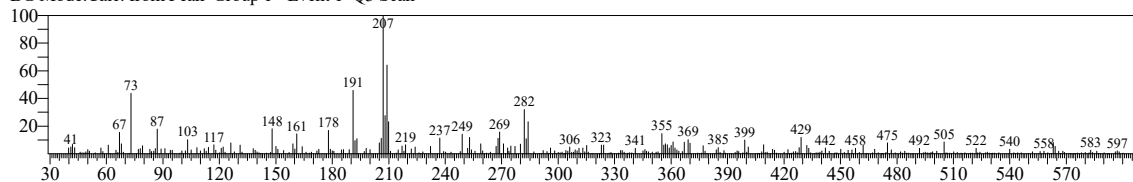

Hit#:1 Entry:290 Library:OA TMS DB5\_67min\_V3.lib

SI:36 Formula:C13H23NO3Si2 CAS:548-93-6 MolWeight:297 RetIndex:1773

CompName:3-Hydroxyanthranilic acid-2TMS ; 2-amino-3-hydroxybenzoic acid

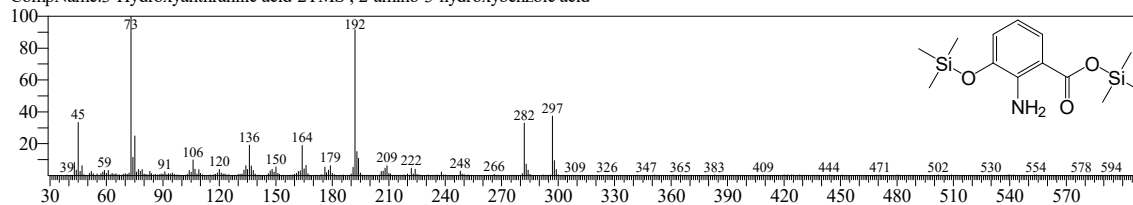

Hit#:2 Entry:452 Library:OA TMS DB5\_67min\_V3.lib

SI:34 Formula:C15H25NO4Si2 CAS:487-54-7 MolWeight:339 RetIndex:2086

CompName:2-Hydroxyhippuric acid-2TMS ; 2-[(2-hydroxybenzoyl)amino]acetic acid

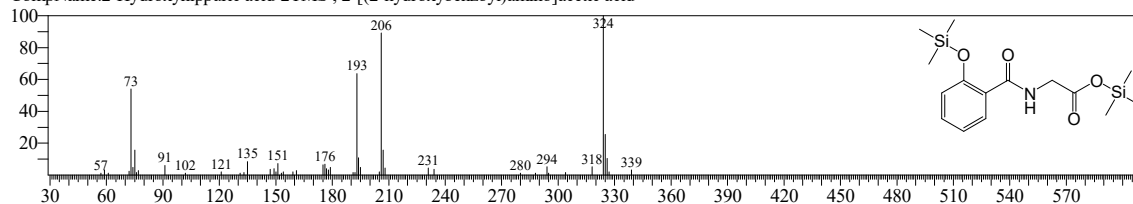

Hit#:3 Entry:402 Library:OA TMS DB5\_67min\_V3.lib

SI:34 Formula:C20H42O4Si4 CAS:775-01-9 MolWeight:458 RetIndex:1942

CompName:3,4-Dihydroxymandelic acid-4TMS ; 2-(3,4-dihydroxyphenyl)-2-hydroxyacetic acid

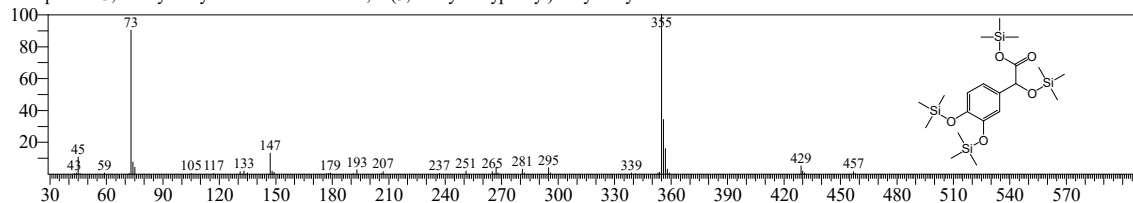

Hit#:4 Entry:528 Library:OA TMS DB5\_67min\_V3.lib

SI:33 Formula:C17H28Cl2N2O5Si2 CAS:56-75-7 MolWeight:466 RetIndex:2508

CompName:Chloramphenicol-2TMS ; 2,2-dichloro-N-[(1R,2R)-1,3-dihydroxy-1-(4-nitrophenyl)propan-2-yl]acetamide

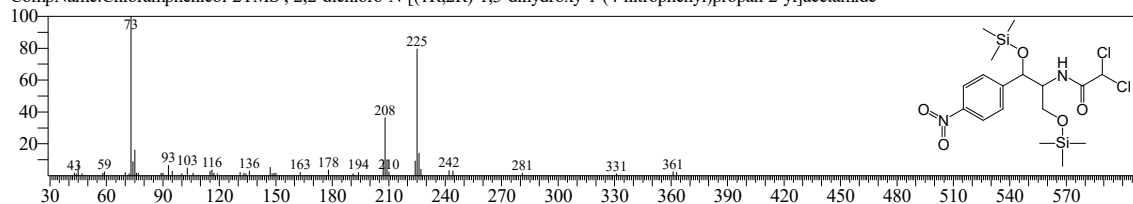

Hit#:5 Entry:294 Library:OA TMS DB5\_67min\_V3.lib

SI:33 Formula:C15H26O4Si2 CAS:306-08-1 MolWeight:326 RetIndex:1782

CompName:Homovanillic acid-2TMS ; 2-(4-hydroxy-3-methoxyphenyl)acetic acid

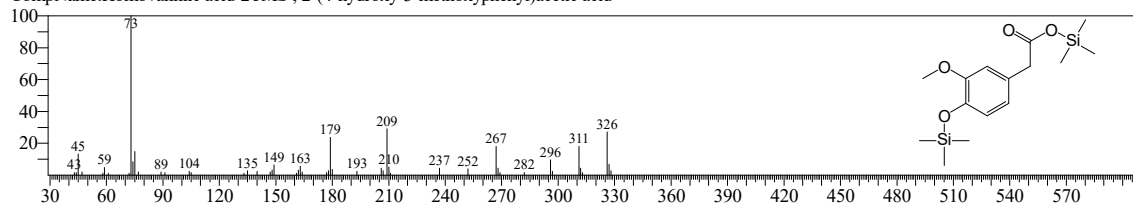

# TNAU

<< Target >>

Line#:6 R.Time:29.635(Scan#:5028) MassPeaks:320

RawMode:Averaged 29.630-29.640(5027-5029) BasePeak:207.05(2165)

BG Mode:Calc. from Peak Group 1 - Event 1 Q3 Scan

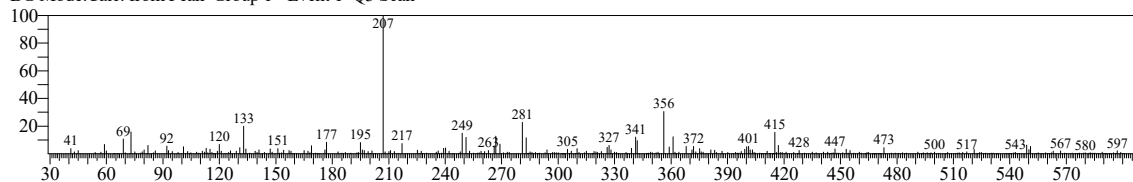

Hit#:1 Entry:328 Library:OA\_TMS\_DB5\_67min\_V3.lib

SI:33 Formula:C<sub>13</sub>H<sub>23</sub>NO<sub>2</sub>Si<sub>2</sub> CAS:150-13-0 MolWeight:281 RetIndex:1845

CompName:4-Aminobenzoic acid-2TMS ; 4-aminobenzoic acid

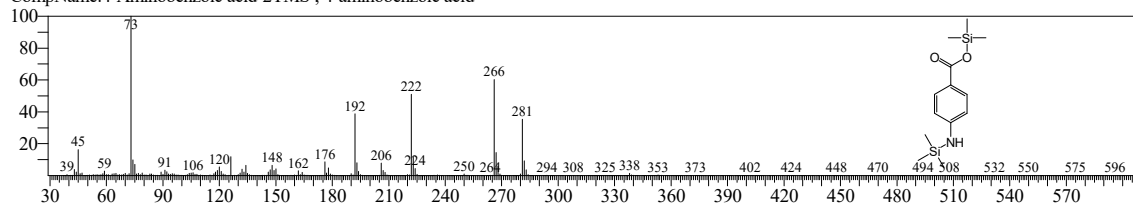

Hit#:2 Entry:343 Library:OA\_TMS\_DB5\_67min\_V3.lib

SI:32 Formula:C<sub>18</sub>H<sub>37</sub>NO<sub>3</sub>Si<sub>3</sub> CAS:51-43-4 MolWeight:399 RetIndex:1868

CompName:Epinephrine-3TMS ; 4-[(1R)-1-hydroxy-2-(methylamino)ethyl]benzene-1,2-diol

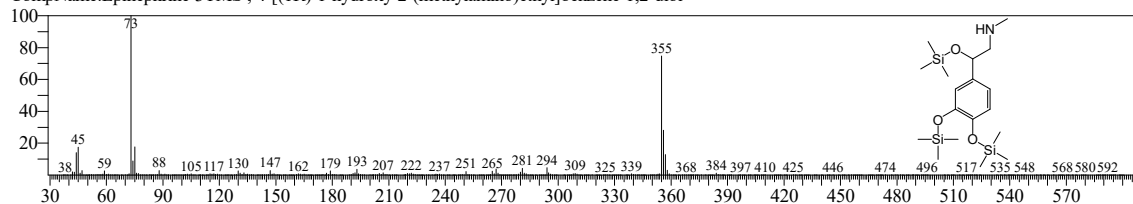

Hit#:3 Entry:10 Library:OA\_TMS\_DB5\_67min\_V3.lib

SI:31 Formula:C<sub>10</sub>H<sub>24</sub>O<sub>3</sub>Si<sub>2</sub> CAS:594-61-6 MolWeight:248 RetIndex:1067

CompName:2-Hydroxyisobutyric acid-2TMS ; 2-hydroxy-2-methylpropanoic acid

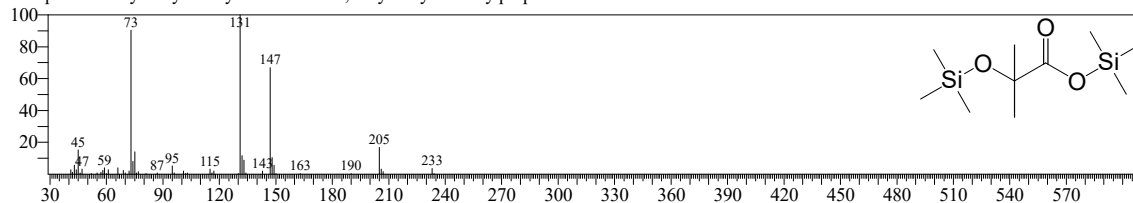

Hit#:4 Entry:173 Library:OA\_TMS\_DB5\_67min\_V3.lib

SI:31 Formula:C<sub>15</sub>H<sub>30</sub>O<sub>3</sub>Si<sub>3</sub> CAS:87-66-1 MolWeight:342 RetIndex:1559

CompName:Pyrogallol-3TMS ; benzene-1,2,3-triol

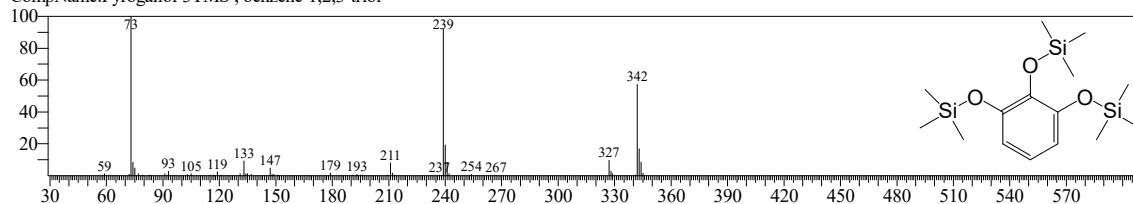

Hit#:5 Entry:203 Library:OA\_TMS\_DB5\_67min\_V3.lib

SI:30 Formula:C<sub>13</sub>H<sub>23</sub>NO<sub>2</sub>Si<sub>2</sub> CAS:118-92-3 MolWeight:281 RetIndex:1623

CompName:Anthranilic acid-2TMS ; 2-aminobenzoic acid

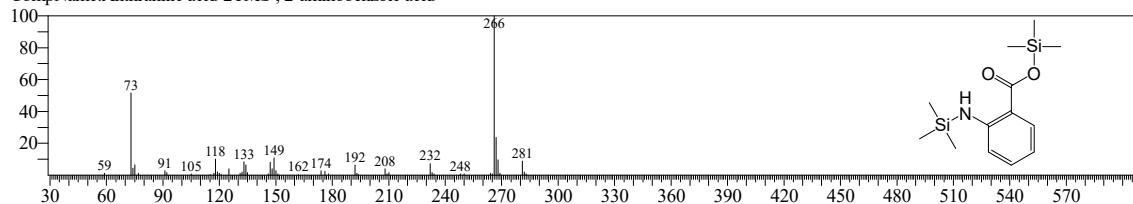

# TNAU

<< Target >>

Line#:7 R.Time:29.800(Scan#:5061) MassPeaks:289

RawMode:Averaged 29.795-29.805(5060-5062) BasePeak:207.00(1413)

BG Mode:Calc. from Peak Group 1 - Event 1 Q3 Scan

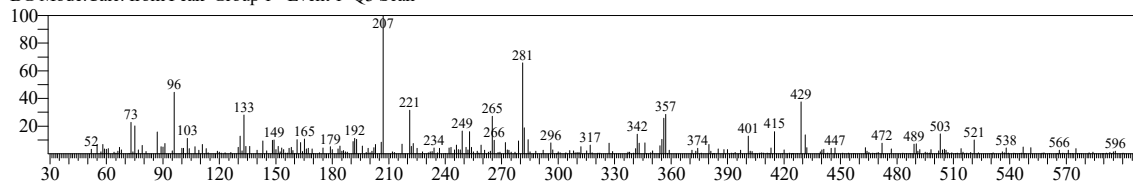

Hit#:1 Entry:402 Library:OA\_TMS\_DB5\_67min\_V3.lib

SI:41 Formula:C<sub>20</sub>H<sub>42</sub>O<sub>4</sub>Si<sub>4</sub> CAS:775-01-9 MolWeight:458 RetIndex:1942

CompName:3,4-Dihydroxymandelic acid-4TMS ; 2-(3,4-dihydroxyphenyl)-2-hydroxyacetic acid

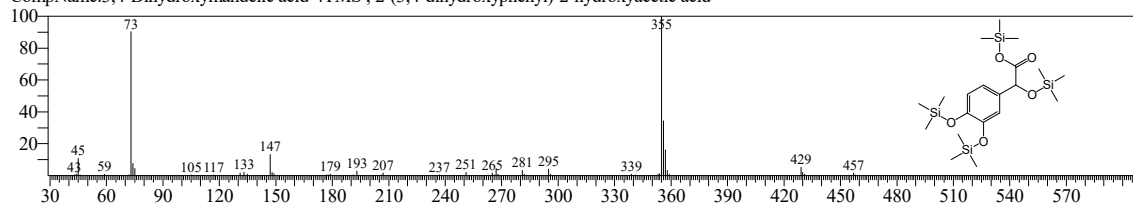

Hit#:2 Entry:343 Library:OA\_TMS\_DB5\_67min\_V3.lib

SI:38 Formula:C<sub>18</sub>H<sub>37</sub>NO<sub>3</sub>Si<sub>3</sub> CAS:51-43-4 MolWeight:399 RetIndex:1868

CompName:Epinephrine-3TMS ; 4-[(1R)-1-hydroxy-2-(methylamino)ethyl]benzene-1,2-diol

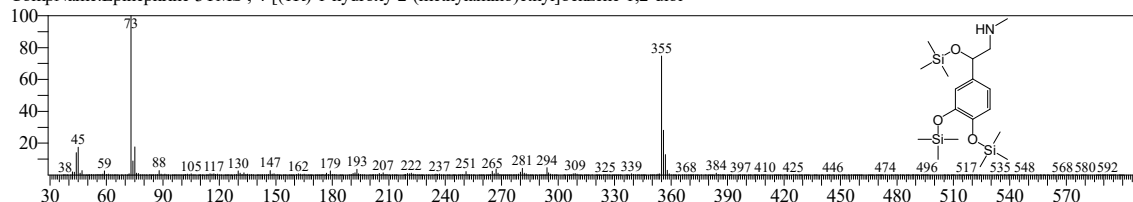

Hit#:3 Entry:328 Library:OA\_TMS\_DB5\_67min\_V3.lib

SI:35 Formula:C<sub>13</sub>H<sub>23</sub>NO<sub>2</sub>Si<sub>2</sub> CAS:150-13-0 MolWeight:281 RetIndex:1845

CompName:4-Aminobenzoic acid-2TMS ; 4-aminobenzoic acid

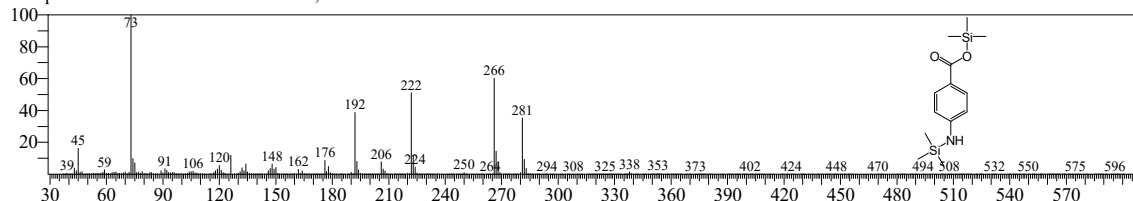

Hit#:4 Entry:315 Library:OA\_TMS\_DB5\_67min\_V3.lib

SI:34 Formula:C<sub>16</sub>H<sub>30</sub>O<sub>4</sub>Si<sub>3</sub> CAS:99-50-3 MolWeight:370 RetIndex:1833

CompName:Protocatechuic acid-3TMS ; 3,4-dihydroxybenzoic acid

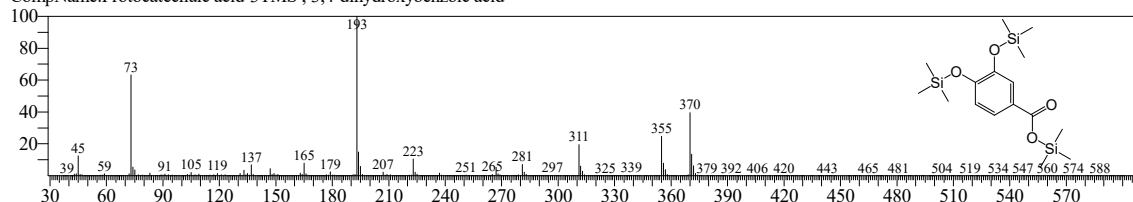

Hit#:5 Entry:384 Library:OA\_TMS\_DB5\_67min\_V3.lib

SI:33 Formula:C<sub>17</sub>H<sub>35</sub>NO<sub>3</sub>Si<sub>3</sub> CAS:65-23-6 MolWeight:385 RetIndex:1919

CompName:Pyridoxine-3TMS ; 4,5-bis(hydroxymethyl)-2-methylpyridin-3-ol

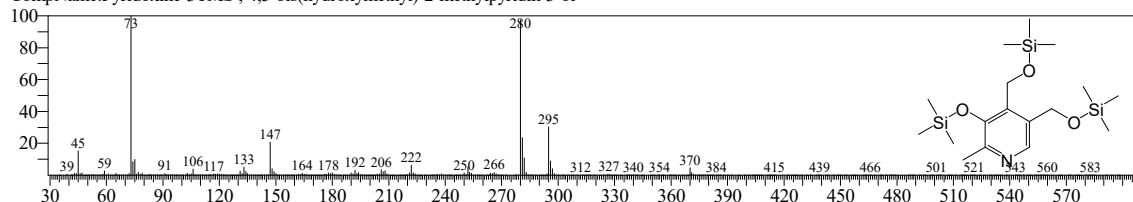



# TNAU

<< Target >>

Line#:8 R.Time:30.345(Scan#:5170) MassPeaks:320

RawMode:Averaged 30.340-30.350(5169-5171) BasePeak:281.05(1028)

BG Mode:Calc. from Peak Group 1 - Event 1 Q3 Scan

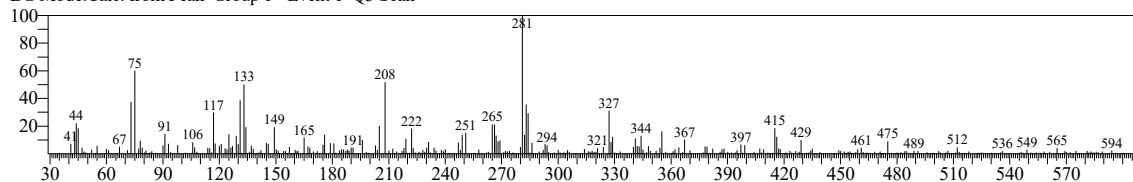

Hit#:1 Entry:328 Library:OA TMS DB5\_67min\_V3.lib

SI:45 Formula:C<sub>13</sub>H<sub>23</sub>NO<sub>2</sub>Si<sub>2</sub> CAS:150-13-0 MolWeight:281 RetIndex:1845

CompName:4-Aminobenzoic acid-2TMS ; 4-aminobenzoic acid



Hit#:2 Entry:203 Library:OA TMS DB5\_67min\_V3.lib

SI:42 Formula:C<sub>13</sub>H<sub>23</sub>NO<sub>2</sub>Si<sub>2</sub> CAS:118-92-3 MolWeight:281 RetIndex:1623

CompName:Anthranilic acid-2TMS ; 2-aminobenzoic acid

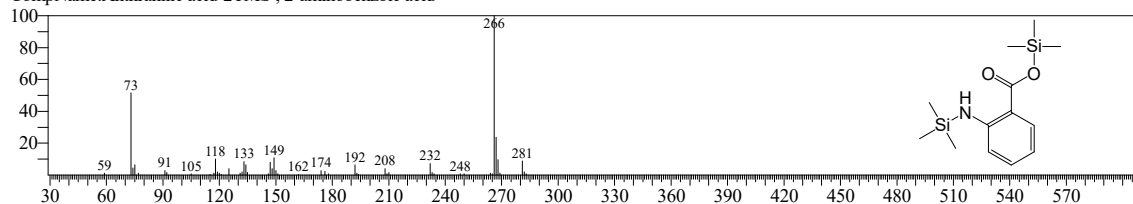

Hit#:3 Entry:343 Library:OA TMS DB5\_67min\_V3.lib

SI:39 Formula:C<sub>18</sub>H<sub>37</sub>NO<sub>3</sub>Si<sub>3</sub> CAS:51-43-4 MolWeight:399 RetIndex:1868

CompName:Epinephrine-3TMS ; 4-[(1R)-1-hydroxy-2-(methylamino)ethyl]benzene-1,2-diol

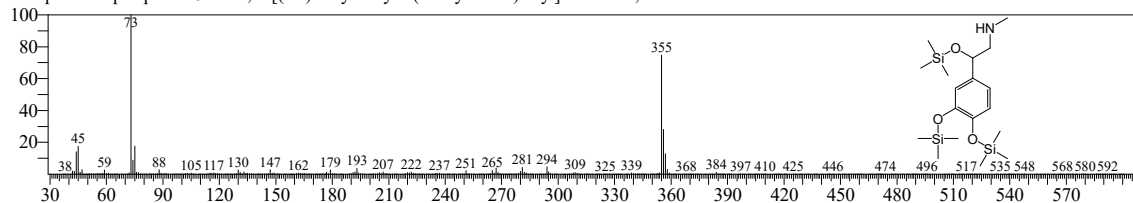

Hit#:4 Entry:310 Library:OA TMS DB5\_67min\_V3.lib

SI:37 Formula:C<sub>11</sub>H<sub>20</sub>N<sub>4</sub>O<sub>2</sub>Si<sub>2</sub> CAS:68-94-0 MolWeight:280 RetIndex:1822

CompName:Hypoxanthine-2TMS ; 3,7-dihydropurin-6-one

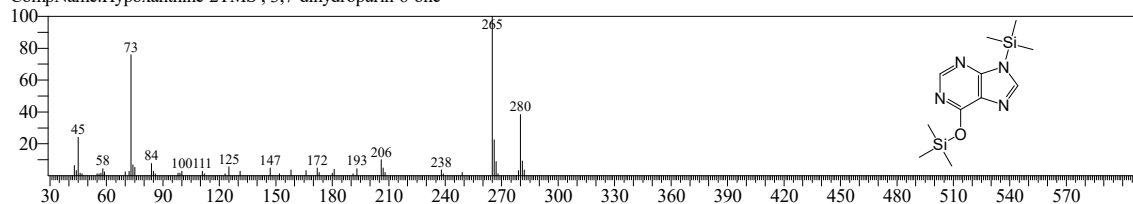

Hit#:5 Entry:472 Library:OA TMS DB5\_67min\_V3.lib

SI:37 Formula:C<sub>20</sub>H<sub>42</sub>O<sub>2</sub>Si<sub>2</sub> CAS:506-12-7 MolWeight:342 RetIndex:2146

CompName:Margaric acid-TMS ; heptadecanoic acid

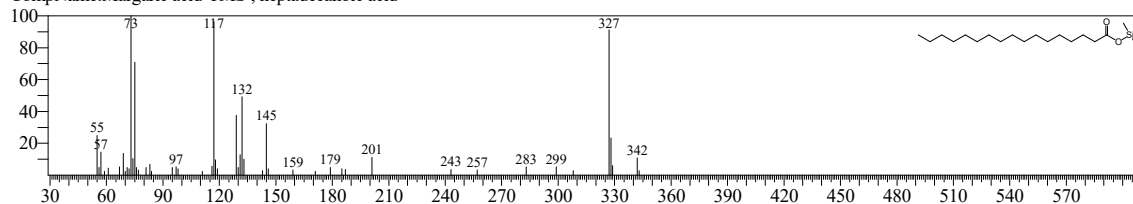

<< Target >>

Line#9 R.Time:30.810(Scan#:5263) MassPeaks:273

RawMode:Averaged 30.805-30.815(5262-5264) BasePeak:207.05(1319)

BG Mode:Calc. from Peak Group 1 - Event 1 Q3 Scan

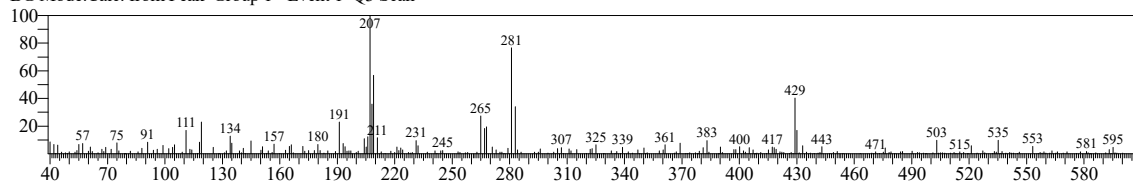

Hit#1 Entry:310 Library:OA\_TMS\_DB5\_67min\_V3.lib

SI:32 Formula:C11H20N4OSi2 CAS:68-94-0 MolWeight:280 RetIndex:1822

CompName:Hypoxanthine-2TMS ; 3,7-dihdropurin-6-one

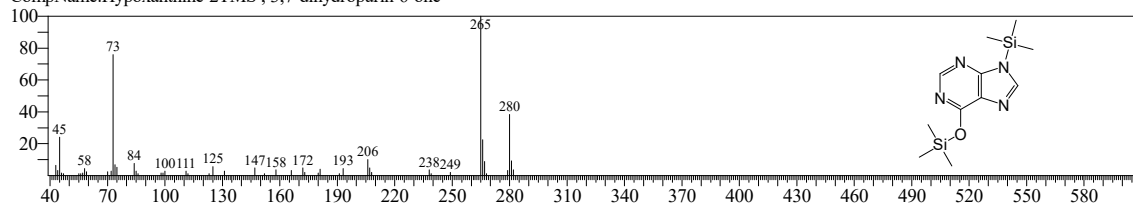

Hit#2 Entry:341 Library:OA\_TMS\_DB5\_67min\_V3.lib

SI:31 Formula:C18H34O4Si3 CAS:3247-75-4 MolWeight:398 RetIndex:1864

CompName:3-(3-Hydroxyphenyl)-3-hydroxypropionic acid-3TMS ; 3-hydroxy-3-(3-hydroxyphenyl)propanoic acid

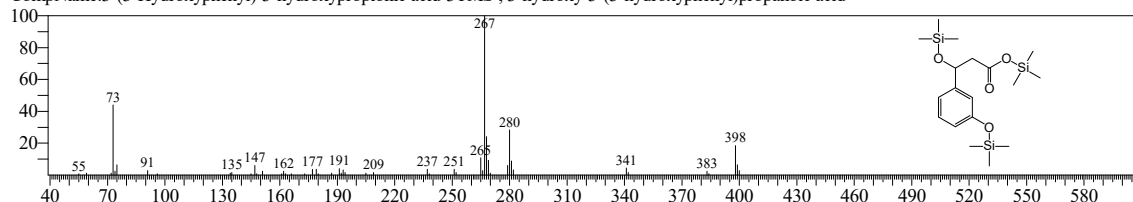

Hit#3 Entry:211 Library:OA\_TMS\_DB5\_67min\_V3.lib

SI:30 Formula:C13H22O3Si2 CAS:99-96-7 MolWeight:282 RetIndex:1636

CompName:4-Hydroxybenzoic acid-2TMS ; 4-hydroxybenzoic acid

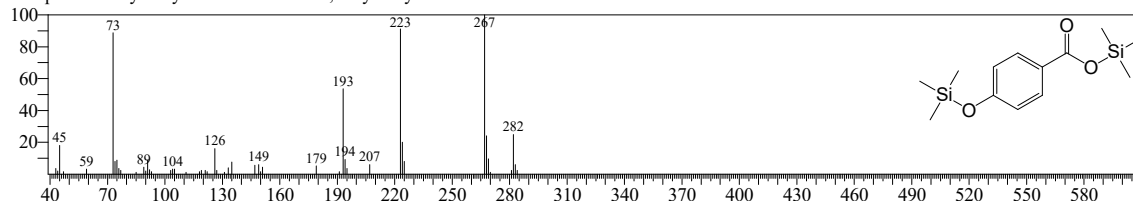

Hit#4 Entry:179 Library:OA\_TMS\_DB5\_67min\_V3.lib

SI:28 Formula:C13H22O3Si2 CAS:99-06-9 MolWeight:282 RetIndex:1572

CompName:3-Hydroxybenzoic acid-2TMS ; 3-hydroxybenzoic acid

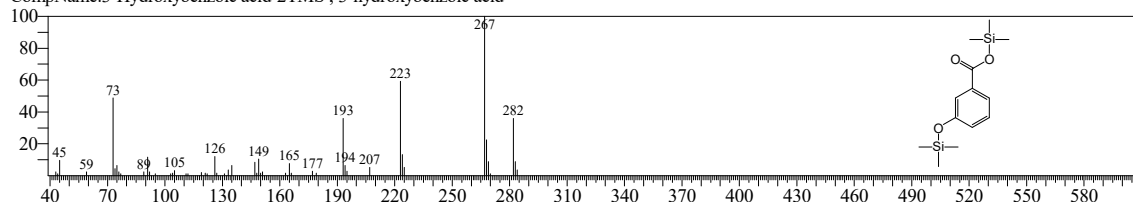

Hit#5 Entry:365 Library:OA\_TMS\_DB5\_67min\_V3.lib

SI:26 Formula:C13H19NO3Si CAS:42013-20-7 MolWeight:265 RetIndex:1898

CompName:2-Methylhippuric acid-TMS ; 2-[(2-methylbenzoyl)amino]acetic acid

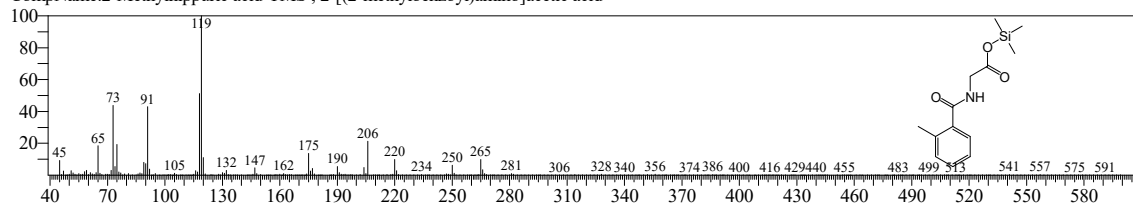

# TNAU

<< Target >>

Line#:10 R.Time:31.725(Scan#:5446) MassPeaks:286

RawMode:Averaged 31.720-31.730(5445-5447) BasePeak:177.00(475)

BG Mode:Calc. from Peak Group 1 - Event 1 Q3 Scan

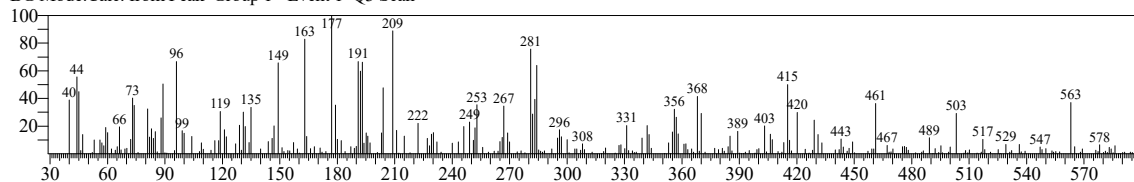

Hit#:1 Entry:328 Library:OA\_TMS\_DB5\_67min\_V3.lib

SI:32 Formula:C<sub>13</sub>H<sub>23</sub>NO<sub>2</sub>Si<sub>2</sub> CAS:150-13-0 MolWeight:281 RetIndex:1845

CompName:4-Aminobenzoic acid-2TMS ; 4-aminobenzoic acid

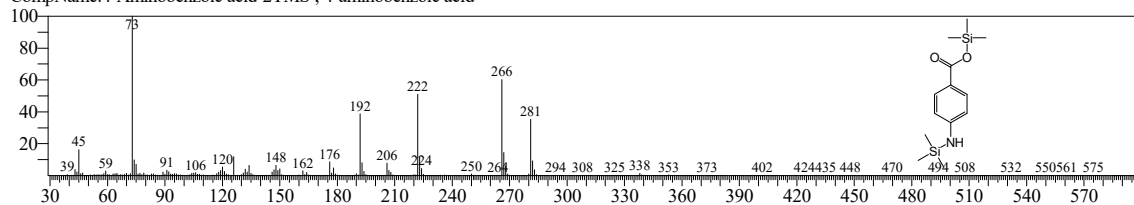

Hit#:2 Entry:290 Library:OA\_TMS\_DB5\_67min\_V3.lib

SI:32 Formula:C<sub>13</sub>H<sub>23</sub>NO<sub>3</sub>Si<sub>2</sub> CAS:548-93-6 MolWeight:297 RetIndex:1773

CompName:3-Hydroxyanthranilic acid-2TMS ; 2-amino-3-hydroxybenzoic acid

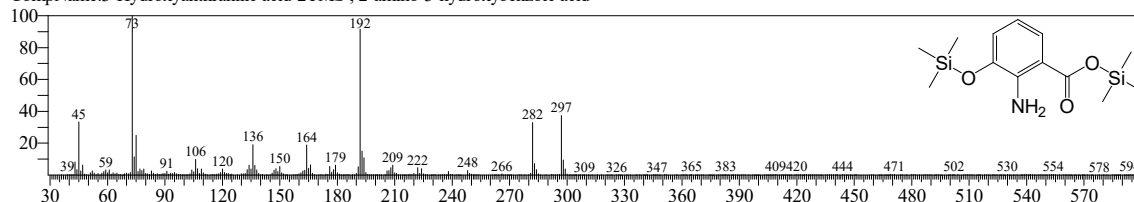

Hit#:3 Entry:179 Library:OA\_TMS\_DB5\_67min\_V3.lib

SI:32 Formula:C<sub>13</sub>H<sub>22</sub>O<sub>3</sub>Si<sub>2</sub> CAS:99-06-9 MolWeight:282 RetIndex:1572

CompName:3-Hydroxybenzoic acid-2TMS ; 3-hydroxybenzoic acid

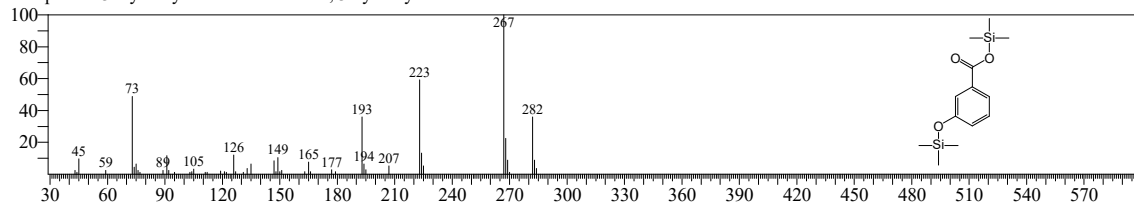

Hit#:4 Entry:211 Library:OA\_TMS\_DB5\_67min\_V3.lib

SI:32 Formula:C<sub>13</sub>H<sub>22</sub>O<sub>3</sub>Si<sub>2</sub> CAS:99-96-7 MolWeight:282 RetIndex:1636

CompName:4-Hydroxybenzoic acid-2TMS ; 4-hydroxybenzoic acid

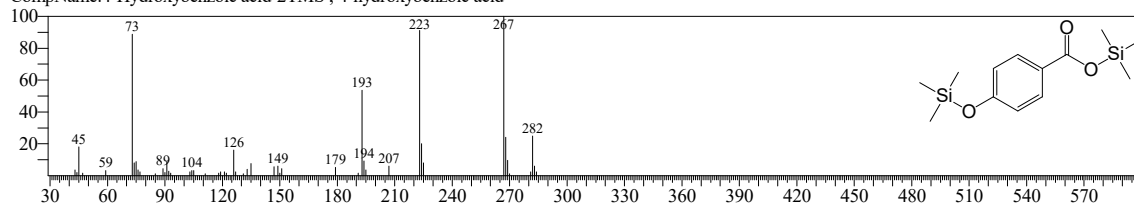

Hit#:5 Entry:184 Library:OA\_TMS\_DB5\_67min\_V3.lib

SI:32 Formula:C<sub>14</sub>H<sub>24</sub>O<sub>3</sub>Si<sub>2</sub> CAS:614-75-5 MolWeight:296 RetIndex:1579

CompName:2-Hydroxyphenylacetic acid-2TMS ; 2-(2-hydroxyphenyl)acetic acid

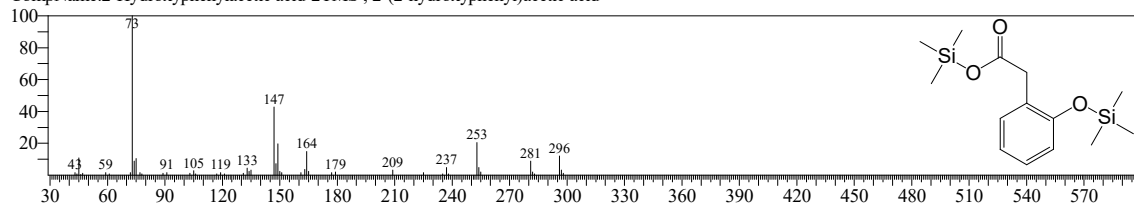

# TNAU

<< Target >>

Line#:11 R.Time:31.900(Scan#:5481) MassPeaks:313

RawMode:Averaged 31.895-31.905(5480-5482) BasePeak:139.10(1766)

BG Mode:Calc. from Peak Group 1 - Event 1 Q3 Scan

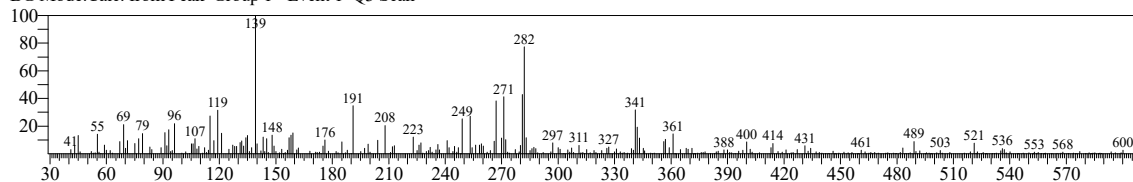

Hit#:1 Entry:38 Library:FA\_ME\_SP2560\_EI\_V3.lib

SI:33 Formula:C23H34O2 CAS:6217-54-5 MolWeight:342 RetIndex:3514

CompName:Methyl cis-4,7,10,13,16,19-Docosahexaenoate ; Docosa-4,7,10,13,16,19-hexaenoic acid

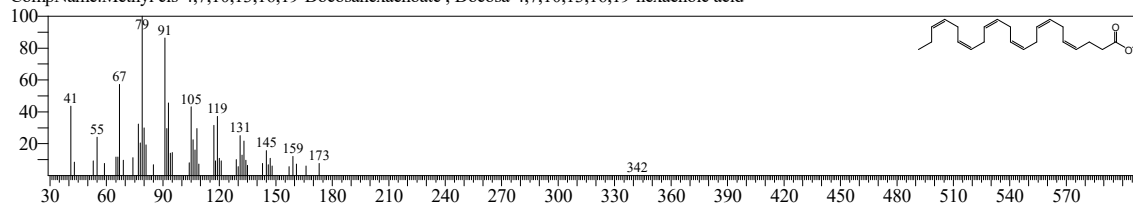

Hit#:2 Entry:534 Library:OA\_TMS\_DB5\_67min\_V3.lib

SI:32 Formula:C25H42O2Si CAS:24880-45-3 MolWeight:402 RetIndex:2591

CompName:Docosapentaenoic acid-TMS ; (7Z,10Z,13Z,16Z,19Z)-docosa-7,10,13,16,19-pentaenoic acid

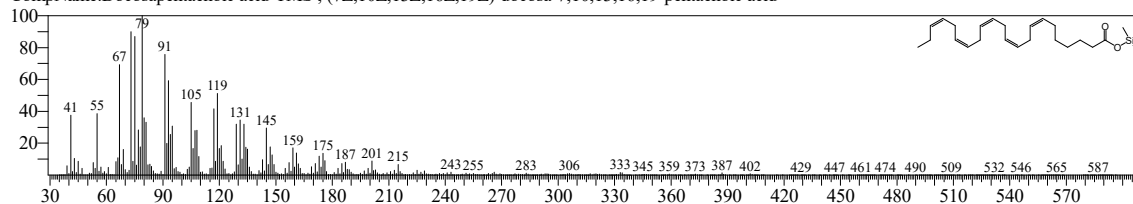

Hit#:3 Entry:509 Library:OA\_TMS\_DB5\_67min\_V3.lib

SI:30 Formula:C23H38O2Si CAS:10417-94-4 MolWeight:374 RetIndex:2389

CompName:Eicosapentaenoic acid-TMS ; icoso-5,8,11,14,17-pentaenoic acid

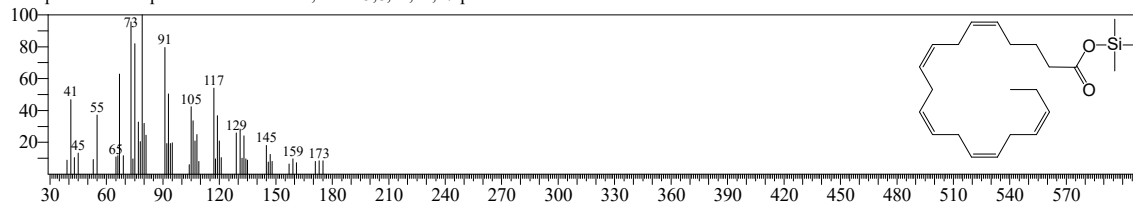

Hit#:4 Entry:211 Library:OA\_TMS\_DB5\_67min\_V3.lib

SI:28 Formula:C13H22O3Si2 CAS:99-96-7 MolWeight:282 RetIndex:1636

CompName:4-Hydroxybenzoic acid-2TMS ; 4-hydroxybenzoic acid

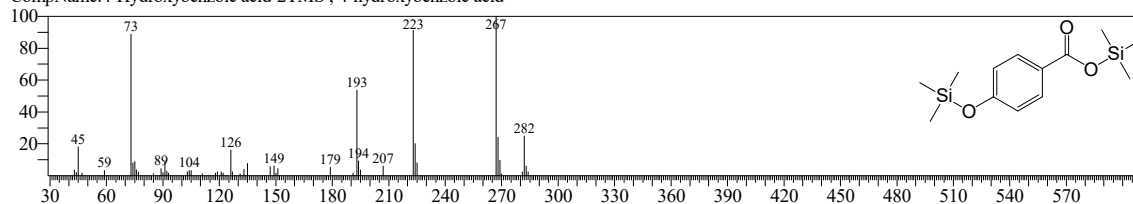

Hit#:5 Entry:33 Library:FA\_ME\_SP2560\_EI\_V3.lib

SI:28 Formula:C21H34O2 CAS:506-32-1 MolWeight:318 RetIndex:3109

CompName:Methyl arachidonate ; (5Z,8Z,11Z,14Z)-icosa-5,8,11,14-tetraenoic acid

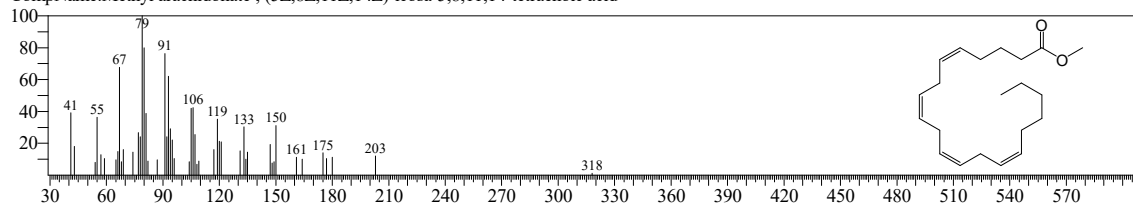

# TNAU

<< Target >>

Line#:12 R.Time:32.450(Scan#:5591) MassPeaks:277

RawMode:Averaged 32.445-32.455(5590-5592) BasePeak:207.00(1597)

BG Mode:Calc. from Peak Group 1 - Event 1 Q3 Scan

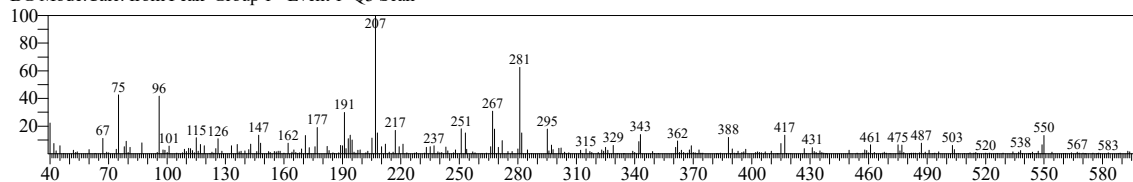

Hit#:1 Entry:341 Library:OA\_TMS\_DB5\_67min\_V3.lib

SI:32 Formula:C18H34O4Si3 CAS:3247-75-4 MolWeight:398 RetIndex:1864

CompName:3-(3-Hydroxyphenyl)-3-hydroxypropionic acid-3TMS ; 3-hydroxy-3-(3-hydroxyphenyl)propanoic acid

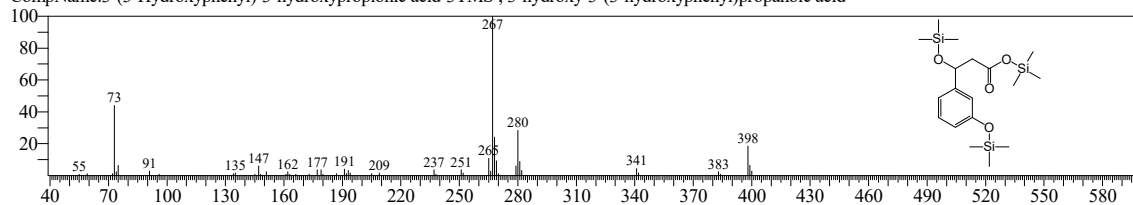

Hit#:2 Entry:211 Library:OA\_TMS\_DB5\_67min\_V3.lib

SI:31 Formula:C13H22O3Si2 CAS:99-96-7 MolWeight:282 RetIndex:1636

CompName:4-Hydroxybenzoic acid-2TMS ; 4-hydroxybenzoic acid

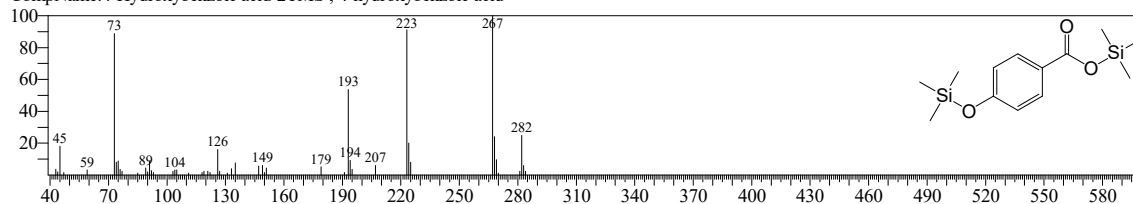

Hit#:3 Entry:179 Library:OA\_TMS\_DB5\_67min\_V3.lib

SI:30 Formula:C13H22O3Si2 CAS:99-06-9 MolWeight:282 RetIndex:1572

CompName:3-Hydroxybenzoic acid-2TMS ; 3-hydroxybenzoic acid

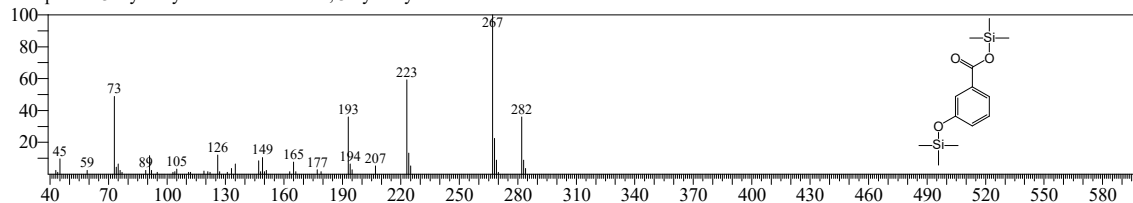

Hit#:4 Entry:291 Library:OA\_TMS\_DB5\_67min\_V3.lib

SI:29 Formula:C14H24O4Si2 CAS:121-34-6 MolWeight:312 RetIndex:1775

CompName:3-Methoxy-4-hydroxybenzoic acid-2TMS ; 4-hydroxy-3-methoxybenzoic acid

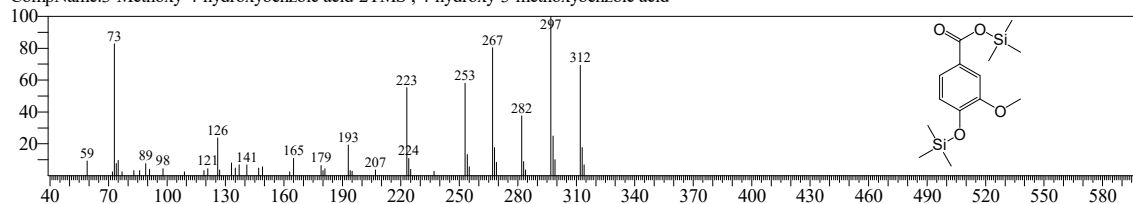

Hit#:5 Entry:359 Library:OA\_TMS\_DB5\_67min\_V3.lib

SI:28 Formula:C18H34O5Si3 CAS:55-10-7 MolWeight:414 RetIndex:1894

CompName:Vanilmandelic acid-3TMS ; 2-hydroxy-2-(4-hydroxy-3-methoxyphenyl)acetic acid

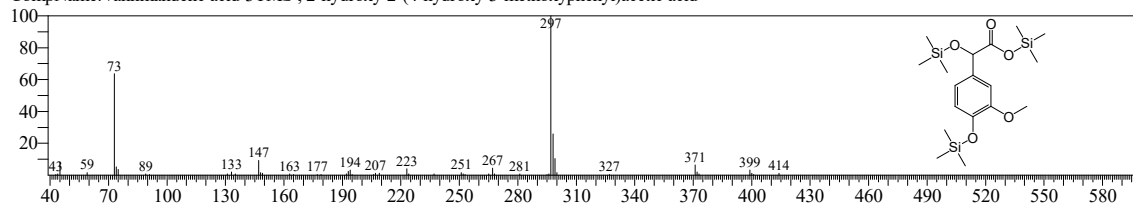

# TNAU

<< Target >>

Line#:13 R.Time:32.505(Scan#:5602) MassPeaks:270

RawMode:Averaged 32.500-32.510(5601-5603) BasePeak:207.00(1122)

BG Mode:Calc. from Peak Group 1 - Event 1 Q3 Scan

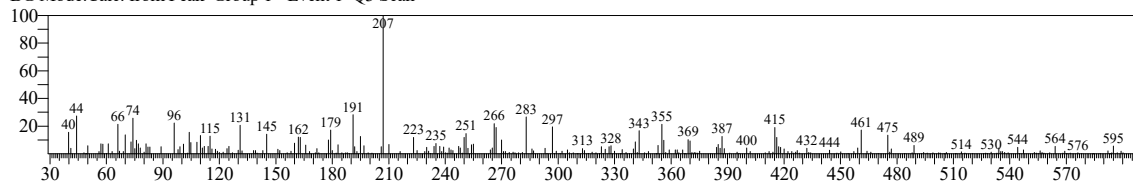

Hit#:1 Entry:343 Library:OA\_TMS\_DB5\_67min\_V3.lib

SI:32 Formula:C18H37NO3Si3 CAS:51-43-4 MolWeight:399 RetIndex:1868

CompName:Epinephrine-3TMS ; 4-[(1R)-1-hydroxy-2-(methylamino)ethyl]benzene-1,2-diol

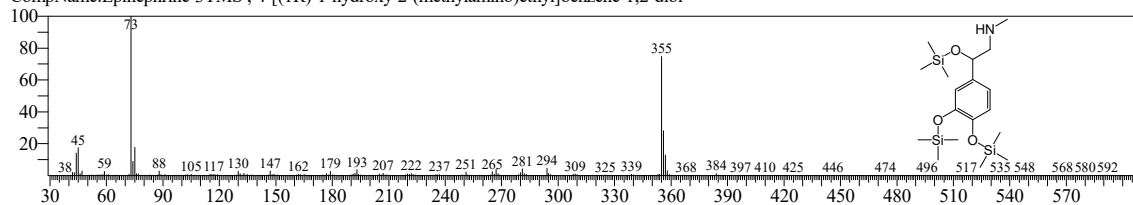

Hit#:2 Entry:402 Library:OA\_TMS\_DB5\_67min\_V3.lib

SI:32 Formula:C20H42O4Si4 CAS:775-01-9 MolWeight:458 RetIndex:1942

CompName:3,4-Dihydroxymandelic acid-4TMS ; 2-(3,4-dihydroxyphenyl)-2-hydroxyacetic acid

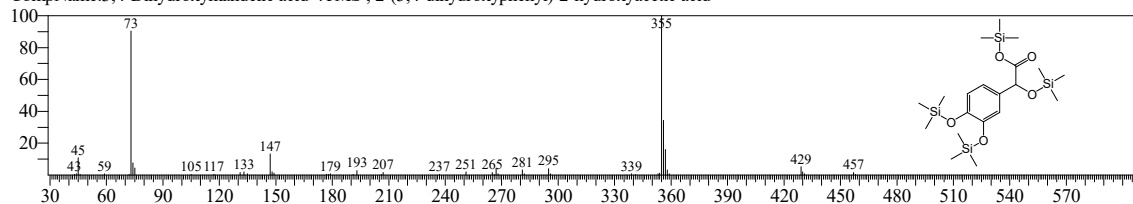

Hit#:3 Entry:211 Library:OA\_TMS\_DB5\_67min\_V3.lib

SI:31 Formula:C13H22O3Si2 CAS:99-96-7 MolWeight:282 RetIndex:1636

CompName:4-Hydroxybenzoic acid-2TMS ; 4-hydroxybenzoic acid

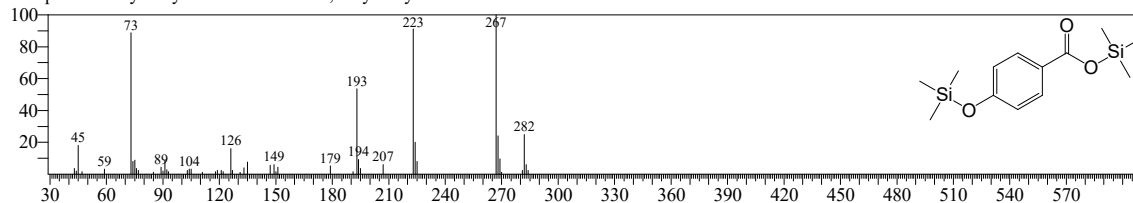

Hit#:4 Entry:368 Library:OA\_TMS\_DB5\_67min\_V3.lib

SI:30 Formula:C17H35NO2Si3 CAS:1196-92-5 MolWeight:369 RetIndex:1899

CompName:Vanillylamine-3TMS ; 4-(aminomethyl)-2-methoxyphenol

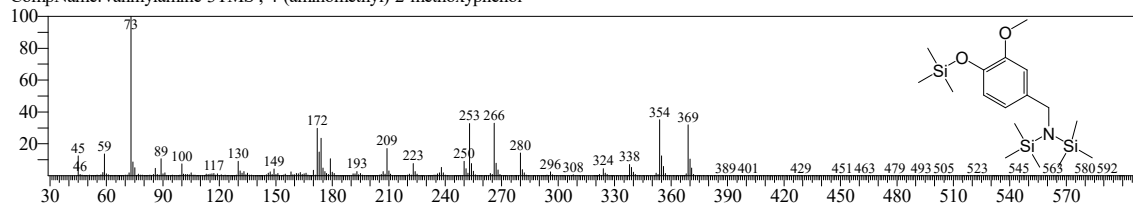

Hit#:5 Entry:179 Library:OA\_TMS\_DB5\_67min\_V3.lib

SI:29 Formula:C13H22O3Si2 CAS:99-06-9 MolWeight:282 RetIndex:1572

CompName:3-Hydroxybenzoic acid-2TMS ; 3-hydroxybenzoic acid

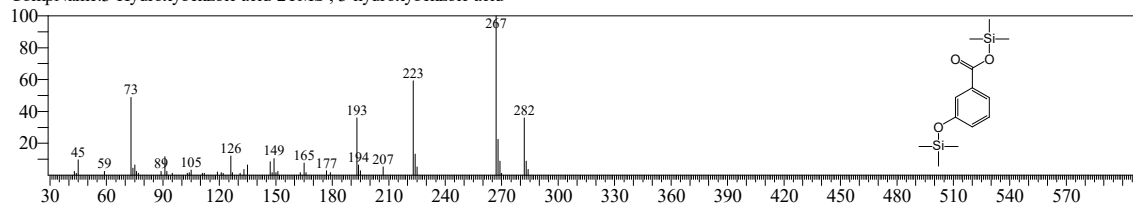

# TNAU

<< Target >>

Line#:14 R.Time:32.880(Scan#:5677) MassPeaks:291

RawMode:Averaged 32.875-32.885(5676-5678) BasePeak:207.05(1183)

BG Mode:Calc. from Peak Group 1 - Event 1 Q3 Scan

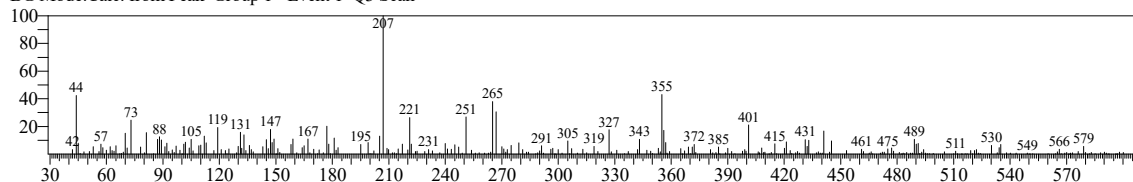

Hit#:1 Entry:402 Library:OA\_TMS\_DB5\_67min\_V3.lib

SI:44 Formula:C<sub>20</sub>H<sub>42</sub>O<sub>4</sub>Si<sub>4</sub> CAS:775-01-9 MolWeight:458 RetIndex:1942

CompName:3,4-Dihydroxymandelic acid-4TMS ; 2-(3,4-dihydroxyphenyl)-2-hydroxyacetic acid

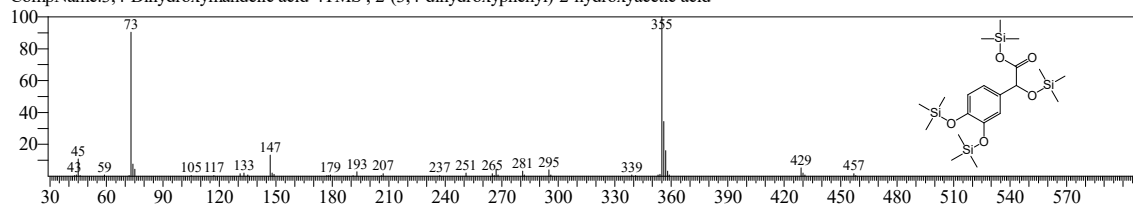

Hit#:2 Entry:343 Library:OA\_TMS\_DB5\_67min\_V3.lib

SI:43 Formula:C<sub>18</sub>H<sub>37</sub>NO<sub>3</sub>Si<sub>3</sub> CAS:51-43-4 MolWeight:399 RetIndex:1868

CompName:Epinephrine-3TMS ; 4-[(1R)-1-hydroxy-2-(methylamino)ethyl]benzene-1,2-diol

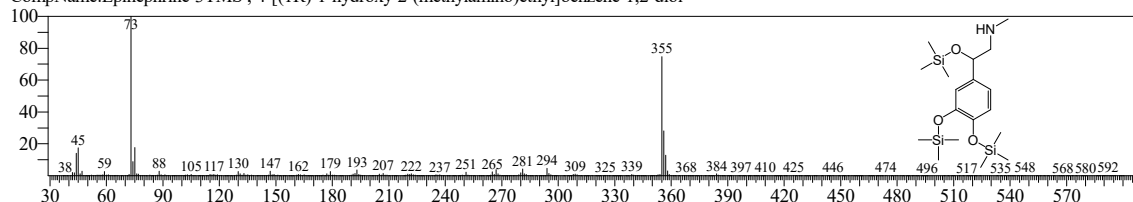

Hit#:3 Entry:13 Library:OA\_TMS\_DB5\_67min\_V3.lib

SI:38 Formula:C<sub>8</sub>H<sub>20</sub>O<sub>3</sub>Si<sub>2</sub> CAS:79-14-1 MolWeight:220 RetIndex:1074

CompName:Glycolic acid-2TMS ; 2-hydroxyacetic acid

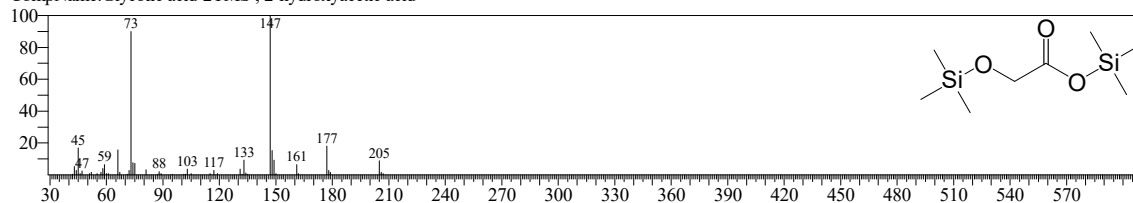

Hit#:4 Entry:10 Library:OA\_TMS\_DB5\_67min\_V3.lib

SI:34 Formula:C<sub>10</sub>H<sub>24</sub>O<sub>3</sub>Si<sub>2</sub> CAS:594-61-6 MolWeight:248 RetIndex:1067

CompName:2-Hydroxyisobutyric acid-2TMS ; 2-hydroxy-2-methylpropanoic acid

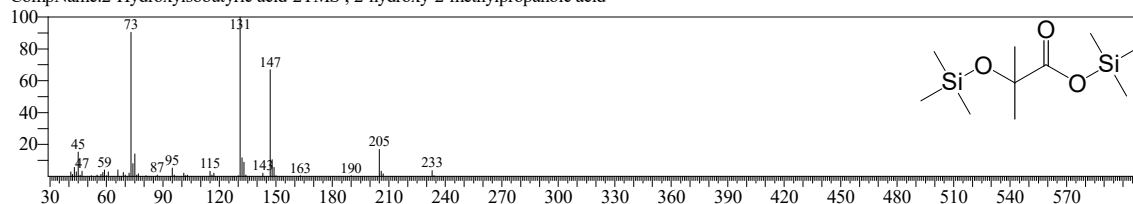

Hit#:5 Entry:77 Library:OA\_TMS\_DB5\_67min\_V3.lib

SI:33 Formula:C<sub>12</sub>H<sub>32</sub>O<sub>3</sub>Si<sub>3</sub> CAS:56-81-5 MolWeight:308 RetIndex:1279

CompName:Glycerol-3TMS ; propane-1,2,3-triol

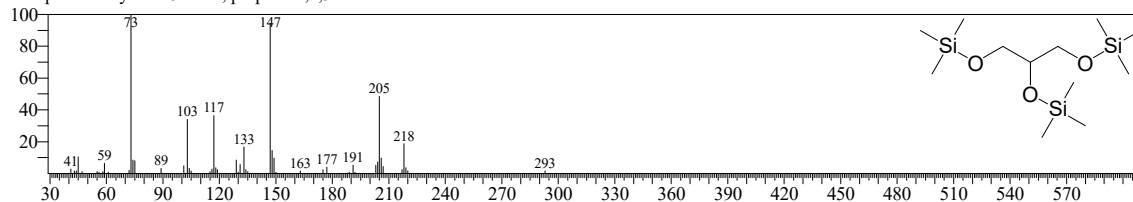

Supplement: Supplementary file 47 [file supplementary]
