# Supplementary material for: Comparative Metabolomics Profiling Reveals Key Metabolites and Associated Pathways Regulating Tuber Dormancy in White Yam (<em>Dioscorea rotundata</em>)
Source: Preprints.org preprint supplement (doi:10.20944/preprints202303.0378.v1), 2023-03-21

# TNAU

## Sample Information

Analyzed by : Admin  
 Analyzed : 02-Sep-22 3:33:43 PM  
 Sample Type : Unknown  
 Level # : 1  
 Sample Name : Sample  
 Sample ID : 9-1  
 IS Amount : [1]=1  
 Sample Amount : 1  
 Dilution Factor : 1  
 Vial # : 10  
 Injection Volume : 5.00  
 Data File : D:\GCMS-8040NX\Sep 2022\Users\01.09.2022\01092022026.qgd  
 Org Data File : D:\GCMS-8040NX\Sep 2022\Users\01.09.2022\01092022026.qgd  
 Method File : D:\GCMS-8040NX\Sep 2022\Method\Scan\_methodfile.qgm  
 Org Method File : D:\GCMS-8040NX\Sep 2022\Method\Scan\_methodfile.qgm  
 Report File :  
 Tuning File : D:\GCMS-8040NX\Aug 2022\Tuning Data\TUNING 25082022.qgt  
 Modified by : Admin  
 Modified : 05-Sep-22 11:07:48 AM

Chromatogram Sample D:\GCMS-8040NX\Sep 2022\Users\01.09.2022\01092022026.qgd

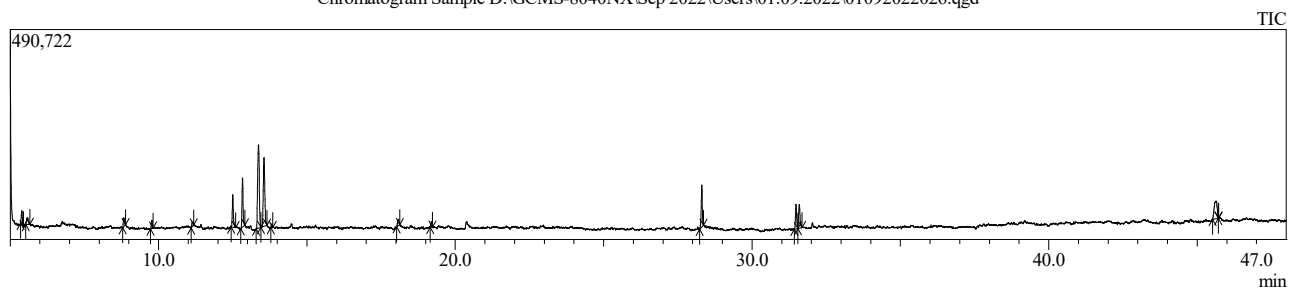

## Peak Report TIC

| Peak# | R.Time | Area    | Area%  | Height | Height% | A/H  | Similarity | Name                                          |
|-------|--------|---------|--------|--------|---------|------|------------|-----------------------------------------------|
| 1     | 5.393  | 73967   | 2.39   | 33068  | 3.51    | 2.24 | 80         | (2-Chloroethyl)(methyl)amine, N-trifluoroacet |
| 2     | 5.587  | 64079   | 2.07   | 15447  | 1.64    | 4.15 | 93         | L-Lactic acid                                 |
| 3     | 8.827  | 61487   | 1.98   | 20229  | 2.15    | 3.04 | 84         | 1-Butanol, 3-methyl-, acetate                 |
| 4     | 9.775  | 46682   | 1.51   | 19335  | 2.05    | 2.41 | 93         | Pentasiloxane, dodecamethyl-                  |
| 5     | 11.146 | 29367   | 0.95   | 10536  | 1.12    | 2.79 | 41         | Fendiline                                     |
| 6     | 12.500 | 200347  | 6.47   | 76484  | 8.13    | 2.62 | 74         | 1,3-Benzodioxol-5-ol                          |
| 7     | 12.828 | 293758  | 9.48   | 114887 | 12.21   | 2.56 | 73         | 2,5-Cyclohexadiene-1,4-dione, dioxime         |
| 8     | 13.367 | 744160  | 24.01  | 194498 | 20.67   | 3.83 | 51         | Methyl cis-13,16-Docosadienate                |
| 9     | 13.554 | 580275  | 18.73  | 161161 | 17.13   | 3.60 | 53         | Methyl cis-13,16-Docosadienate                |
| 10    | 13.817 | 18405   | 0.59   | 8219   | 0.87    | 2.24 | 72         | Trisiloxane, octamethyl-                      |
| 11    | 18.084 | 50563   | 1.63   | 14956  | 1.59    | 3.38 | 88         | .beta.-D-Glucopyranose, 1,6-anhydro-          |
| 12    | 19.200 | 31439   | 1.01   | 13609  | 1.45    | 2.31 | 85         | 2,4-Di-tert-butylphenoxytrimethylsilane       |
| 13    | 28.306 | 255944  | 8.26   | 98543  | 10.47   | 2.60 | 95         | n-Hexadecanoic acid                           |
| 14    | 31.482 | 169608  | 5.47   | 57128  | 6.07    | 2.97 | 94         | 9,12-Octadecadienoic acid (Z,Z)-              |
| 15    | 31.592 | 189688  | 6.12   | 55536  | 5.90    | 3.42 | 89         | cis-9-Hexadecenal                             |
| 16    | 45.637 | 286454  | 9.24   | 41582  | 4.42    | 6.89 | 89         | Diosgenin                                     |
| 17    | 45.715 | 2552    | 0.08   | 5832   | 0.62    | 0.44 | 16         | 2-Deoxy-glucose-4TMS(1)                       |
|       |        | 3098775 | 100.00 | 941050 | 100.00  |      |            |                                               |

Library

# TNAU

<< Target >>

Line#:1 R.Time:5.390(Scan#:79) MassPeaks:310

RawMode:Averaged 5.385-5.395(78-80) BasePeak:140.00(12817)

BG Mode:Calc. from Peak Group 1 - Event 1 Q3 Scan

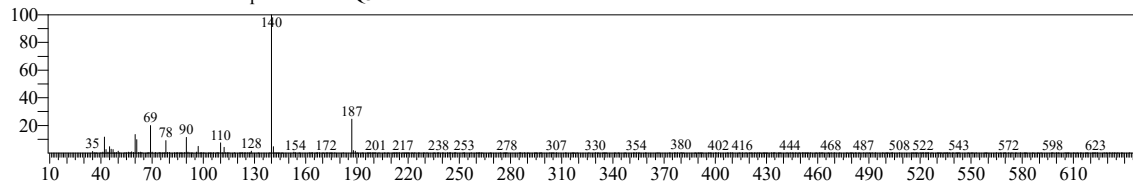

Hit#:1 Entry:43299 Library:NIST20M1.lib

SI:80 Formula:C5H7ClF3NO CAS:18060-05-4 MolWeight:189 RetIndex:779

CompName:(2-Chloroethyl)(methyl)amine, N-trifluoroacetyl- \$\$ (2-Chloroethyl)(methyl)amine, TFA derivative \$\$ Ethanamine, 2-chloro-N-methyl-, N-trifluoro-

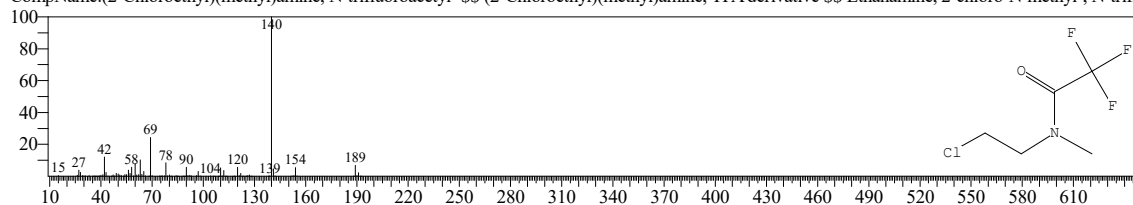

Hit#:2 Entry:52064 Library:NIST20M1.lib

SI:80 Formula:C6H8F3NO3 CAS:0-00-0 MolWeight:199 RetIndex:820

CompName:Sarcosine, N-trifluoroacetyl-, methyl ester

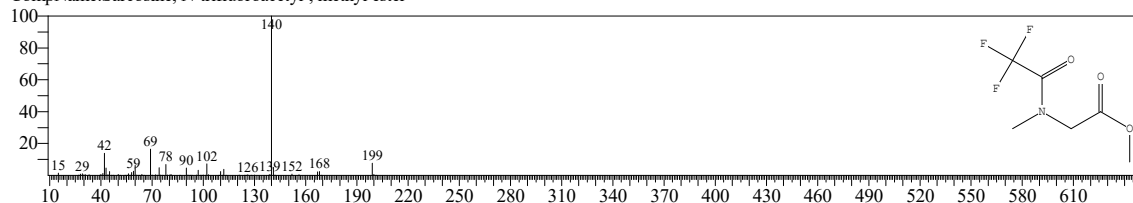

Hit#:3 Entry:40334 Library:NIST20M1.lib

SI:80 Formula:C5H6F3NO3 CAS:0-00-0 MolWeight:185 RetIndex:910

CompName:Sarcosine, N-trifluoroacetyl-

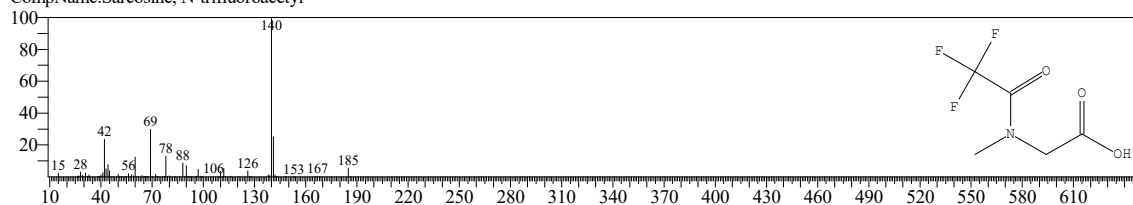

Hit#:4 Entry:122117 Library:NIST20M1.lib

SI:78 Formula:C7H8F6N2O2 CAS:0-00-0 MolWeight:266 RetIndex:987

CompName:2,2,2-Trifluoro-N-methyl-N-[2-[(trifluoroacetyl)amino]ethyl]acetamide

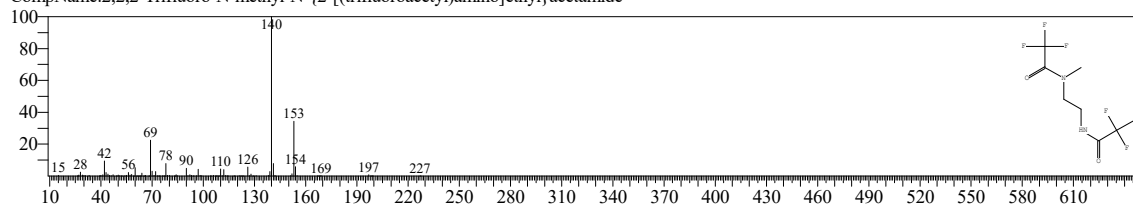

Hit#:5 Entry:65348 Library:NIST20M1.lib

SI:78 Formula:C7H10F3NO3 CAS:0-00-0 MolWeight:213 RetIndex:919

CompName:Sarcosine, N-trifluoroacetyl-, ethyl ester

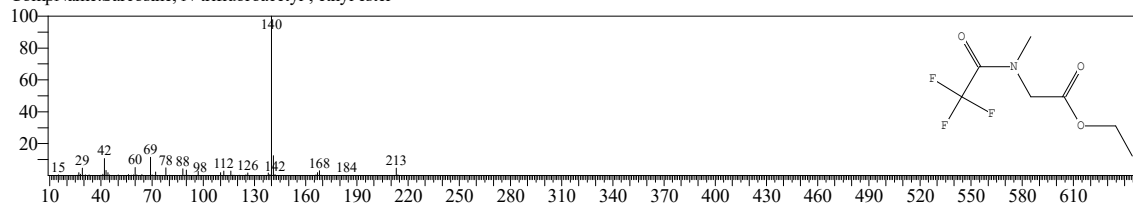

# TNAU

<< Target >>

Line# 2 R.Time: 5.585 (Scan#: 118) MassPeaks: 349

RawMode: Averaged 5.580-5.590 (117-119) BasePeak: 45.05 (10707)

BG Mode: Calc. from Peak Group 1 - Event 1 Q3 Scan

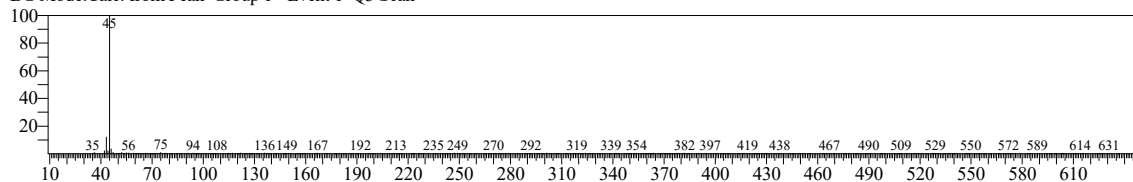

Hit#: 1 Entry: 1162 Library: NIST20M1.lib

SI: 93 Formula: C<sub>3</sub>H<sub>6</sub>O<sub>3</sub> CAS: 79-33-4 MolWeight: 90 RetIndex: 838

CompName: L-Lactic acid (S)-2-Hydroxypropanoic acid (S)-L-(+)-Lactic acid (S)-Propanoic acid, 2-hydroxy-, (S)- (S)-Lactic acid, L- (S)-Espiritin (S)-2-

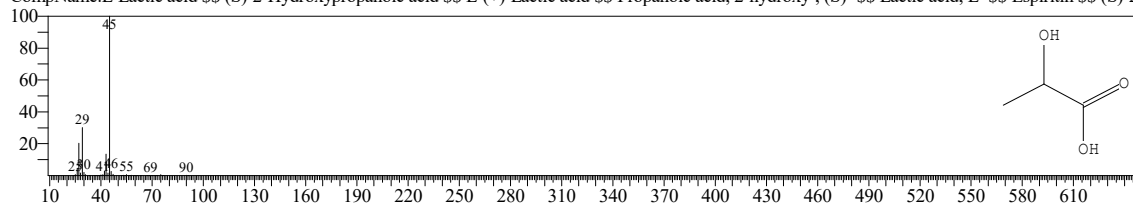

Hit#: 2 Entry: 9648 Library: NIST20M1.lib

SI: 92 Formula: C<sub>4</sub>H<sub>6</sub>O<sub>5</sub> CAS: 595-98-2 MolWeight: 134 RetIndex: 1223

CompName: Methyltartronic acid (S)-2-Hydroxy-2-methylmalonic acid #

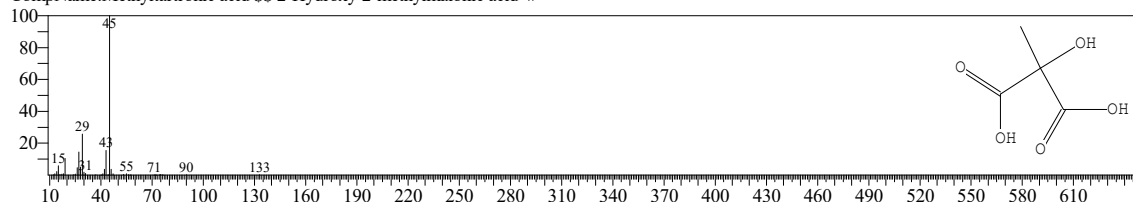

Hit#: 3 Entry: 2686 Library: NIST20R.lib

SI: 92 Formula: C<sub>4</sub>H<sub>8</sub>O<sub>3</sub> CAS: 547-64-8 MolWeight: 104 RetIndex: 748

CompName: Propanoic acid, 2-hydroxy-, methyl ester, (+/-)- (S)-Lactic acid, methyl ester (7CI,8CI) (S)-(+/-)-Methyl 2-hydroxypropanoate (S)-(+/-)-Methy

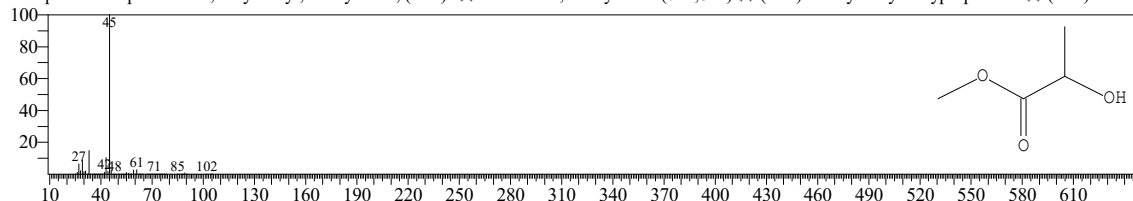

Hit#: 4 Entry: 5294 Library: NIST20M1.lib

SI: 91 Formula: C<sub>5</sub>H<sub>10</sub>O<sub>3</sub> CAS: 687-47-8 MolWeight: 118 RetIndex: 848

CompName: Propanoic acid, 2-hydroxy-, ethyl ester, (L)- (S)-Ethyl (L)-(-)-lactate (S)-Ethyl 2-hydroxypropanoate, (L)-

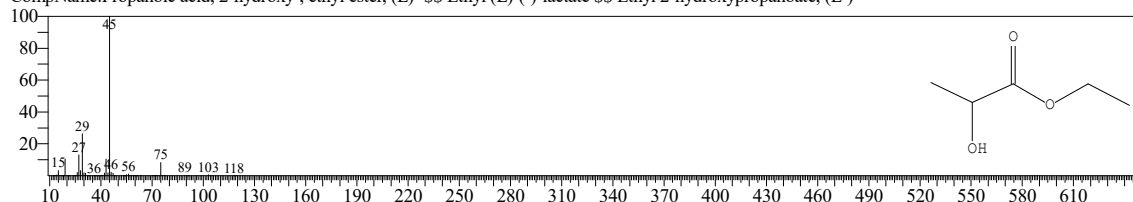

Hit#: 5 Entry: 4651 Library: NIST20R.lib

SI: 91 Formula: C<sub>5</sub>H<sub>10</sub>O<sub>3</sub> CAS: 97-64-3 MolWeight: 118 RetIndex: 848

CompName: Propanoic acid, 2-hydroxy-, ethyl ester (S)-Lactic acid, ethyl ester (S)-Actylol (S)-Acetyl (S)-Ethyl .alpha.-hydroxypropionate (S)-Ethyl lactate (S)-S

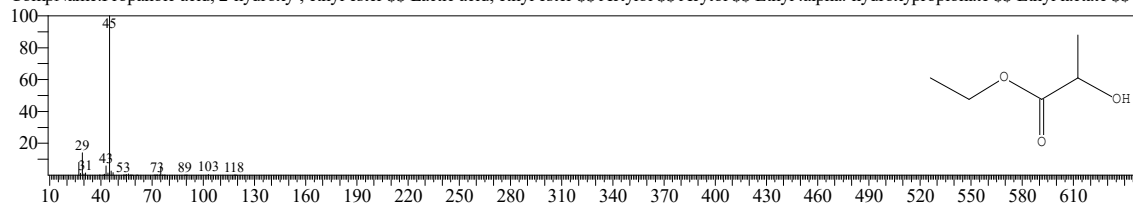

# TNAU

<< Target >>

Line#3 R.Time:8.825(Scan#:766) MassPeaks:388

RawMode:Averaged 8.820-8.830(765-767) BasePeak:43.00(3675)

BG Mode:Calc. from Peak Group 1 - Event 1 Q3 Scan

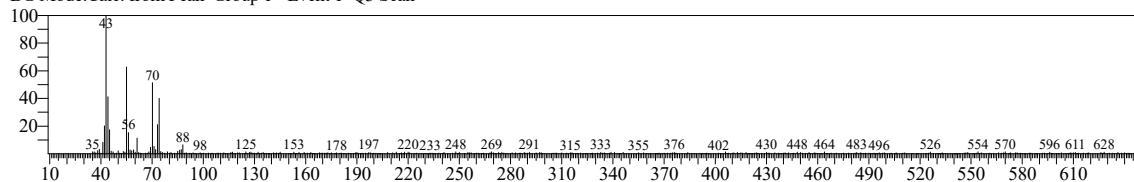

Hit#:1 Entry:6783 Library:NIST20R.lib

SI:84 Formula:C7H14O2 CAS:123-92-2 MolWeight:130 RetIndex:820

CompName:1-Butanol, 3-methyl-, acetate \$\$ Isopentyl alcohol, acetate \$\$ Acetic acid, 3-methylbutyl ester \$\$ Banana oil \$\$ Isoamyl acetate \$\$ Isoamyl etha

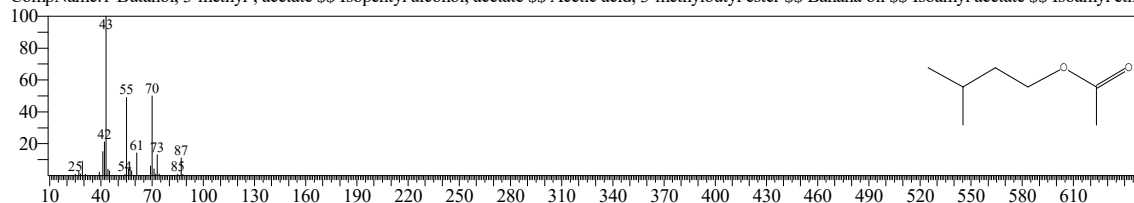

Hit#:2 Entry:8685 Library:NIST20M1.lib

SI:82 Formula:C7H14O2 CAS:628-63-7 MolWeight:130 RetIndex:884

CompName:Acetic acid, pentyl ester \$\$ n-Amyl acetate \$\$ n-Pentyl acetate \$\$ Amyl acetate \$\$ Birnenöl \$\$ Pentyl acetate \$\$ Acetic acid, amyl ester \$\$ Arr

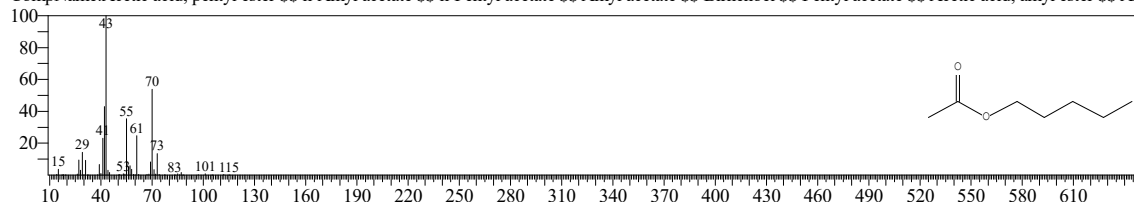

Hit#:3 Entry:6819 Library:NIST20R.lib

SI:82 Formula:C7H14O2 CAS:624-41-9 MolWeight:130 RetIndex:820

CompName:1-Butanol, 2-methyl-, acetate \$\$ 2-Methyl-1-butyl acetate \$\$ 2-Methylbutyl acetate \$\$ Acetic acid 2-methylbutyl ester \$\$ 2-Methylbutyl acetate

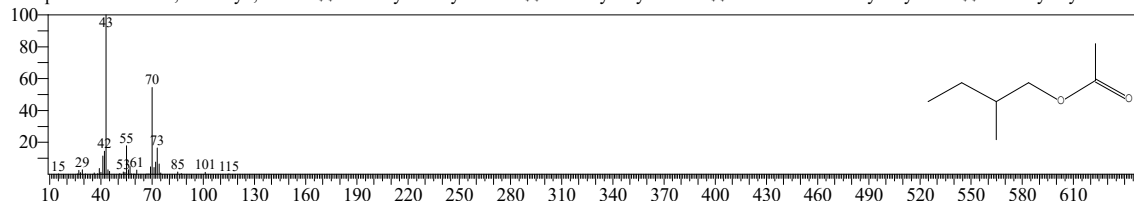

Hit#:4 Entry:1220 Library:NIST20R.lib

SI:80 Formula:C4H8O2 CAS:590-90-9 MolWeight:88 RetIndex:798

CompName:CH3C(O)CH2CH2OH \$\$ Methylolacetone \$\$ Monomethylolacetone \$\$ 3-Ketobutan-1-ol \$\$ 3-Oxo-1-butanol \$\$ 3-Oxobutanol \$\$ 4-Butanol-100

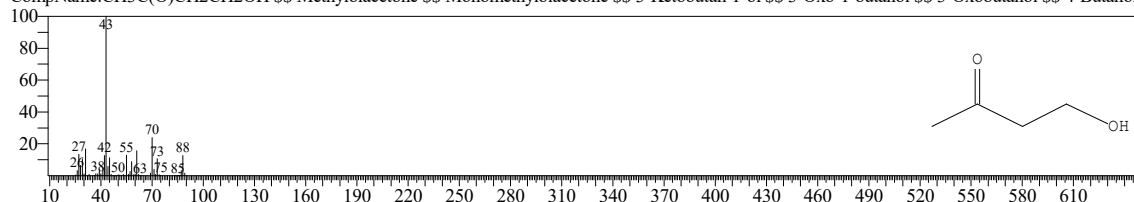

Hit#:5 Entry:32045 Library:NIST20M1.lib

SI:79 Formula:C6H10N2O4 CAS:0-00-0 MolWeight:174 RetIndex:1774

CompName:3-(N'-Acetylhydrazinecarbonyl)propanoic acid

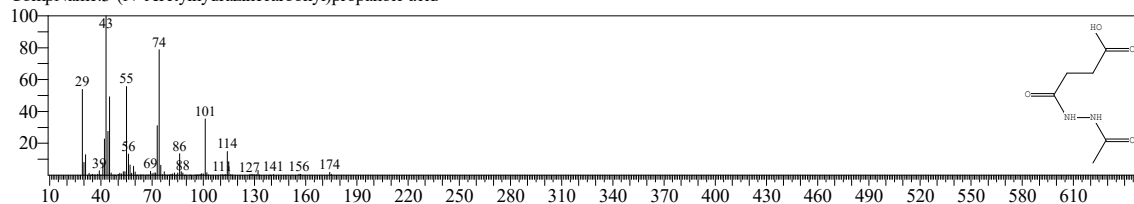

# TNAU

<< Target >>

Line#:4 R.Time:9.775(Scan#:956) MassPeaks:362

RawMode:Averaged 9.770-9.780(955-957) BasePeak:281.05(4115)

BG Mode:Calc. from Peak Group 1 - Event 1 Q3 Scan

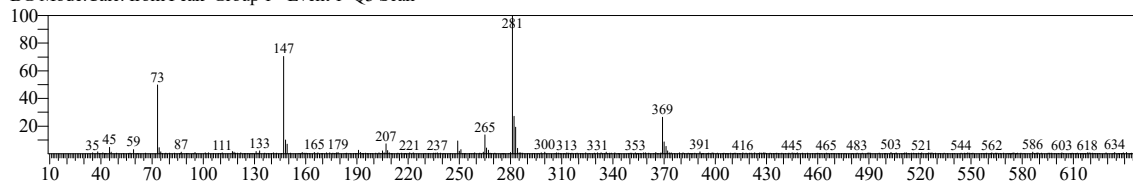

Hit#:1 Entry:40975 Library:NIST20R.lib

SI:93 Formula:C<sub>12</sub>H<sub>36</sub>O<sub>4</sub>Si<sub>5</sub> CAS:141-63-9 MolWeight:384 RetIndex:1068

CompName:Pentasiloxane, dodecamethyl- \$\$ Dodecamethylpentasiloxane \$\$ 1,1,1,3,3,5,5,7,7,9,9-Dodecamethylpentasiloxane #

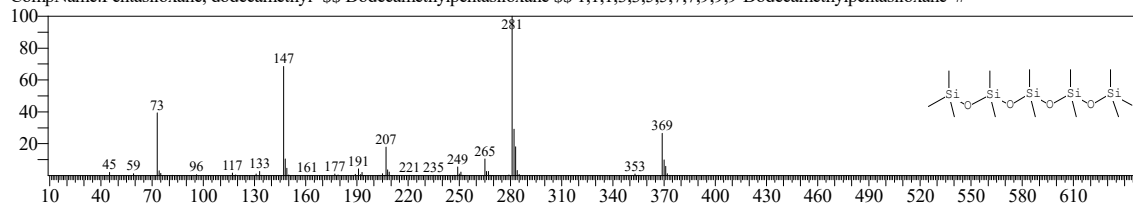

Hit#:2 Entry:249272 Library:NIST20M1.lib

SI:83 Formula:C<sub>12</sub>H<sub>36</sub>O<sub>4</sub>Si<sub>5</sub> CAS:3555-47-3 MolWeight:384 RetIndex:1068

CompName:Trisiloxane, 1,1,1,5,5,5-hexamethyl-3,3-bis[(trimethylsilyl)oxy]- \$\$ Tetrakis(trimethylsiloxy)silane \$\$ Trisiloxane, 1,1,1,5,5,5-hexamethyl-3,3-b

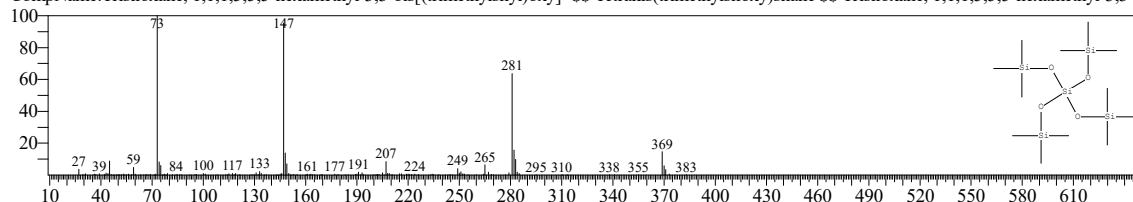

Hit#:3 Entry:27848 Library:NIST20M2.lib

SI:80 Formula:C<sub>18</sub>H<sub>48</sub>O<sub>4</sub>Si<sub>5</sub> CAS:0-00-0 MolWeight:468 RetIndex:1495

CompName:1,3,5,7,9-Pentasiloxane, 1,1,3,3,5,5,7,7,9,9-decamethyl-1,9-di(tert.butyl)-

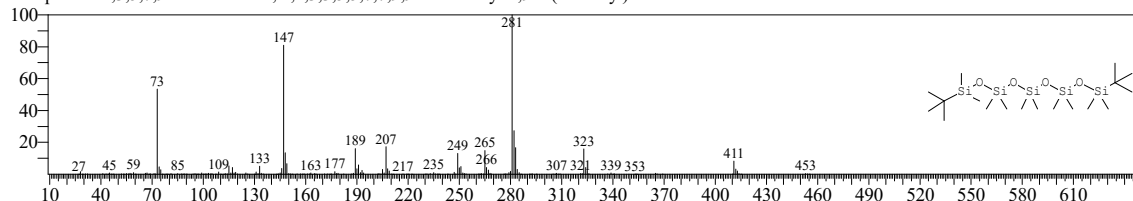

Hit#:4 Entry:249271 Library:NIST20M1.lib

SI:79 Formula:C<sub>12</sub>H<sub>36</sub>O<sub>4</sub>Si<sub>5</sub> CAS:38146-99-5 MolWeight:384 RetIndex:1068

CompName:1,1,1,3,5,5,7,7-Nonamethyl-3-(trimethylsiloxy)tetrasiloxane \$\$ 1,1,1,3,3,5,5,7,7-Nonamethyl-5-[(trimethylsilyl)oxy]tetrasiloxane #

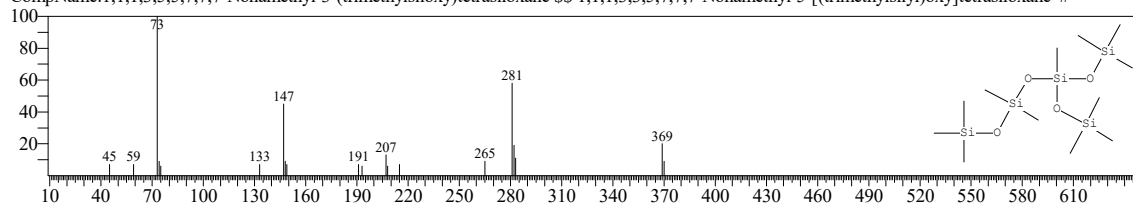

Hit#:5 Entry:158097 Library:NIST20M1.lib

SI:75 Formula:C<sub>14</sub>H<sub>24</sub>O<sub>3</sub>Si<sub>2</sub> CAS:0-00-0 MolWeight:296 RetIndex:1625

CompName:2,6-Dihydroxyacetophenone, 2TMS derivative \$\$ 2',6'-Dihydroxyacetophenone, bis(trimethylsilyl) ether

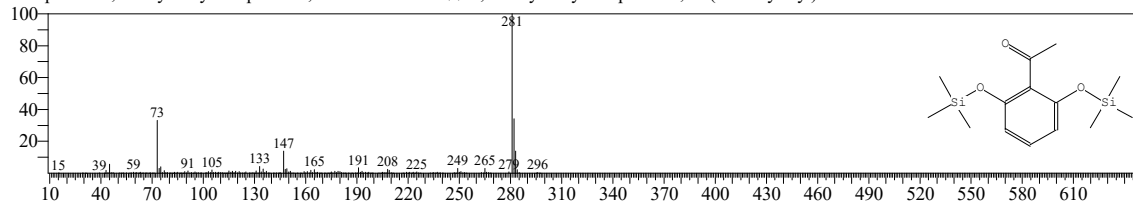

# TNAU

<< Target >>

Line#:5 R.Time:11.145(Scan#:1230) MassPeaks:326

RawMode:Averaged 11.140-11.150(1229-1231) BasePeak:133.05(1181)

BG Mode:Calc. from Peak Group 1 - Event 1 Q3 Scan

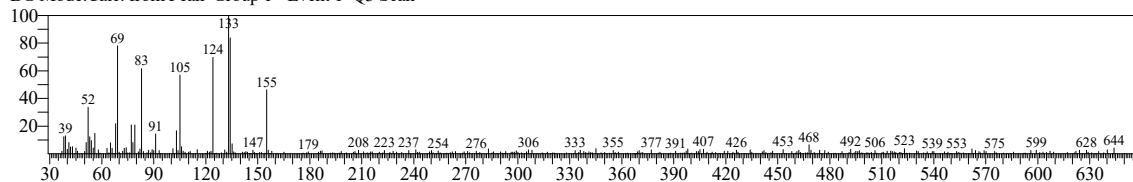

Hit#:1 Entry:530 Library:OA\_TMS\_DB5\_67min\_V3.lib

SI:41 Formula:C23H25N CAS:13042-18-7 MolWeight:315 RetIndex:2545

CompName:Fendiline ; 3,3-diphenyl-N-(1-phenylethyl)propan-1-amine

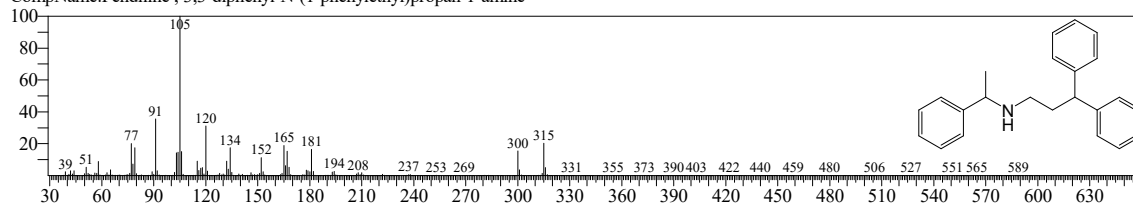

Hit#:2 Entry:508 Library:OA\_TMS\_DB5\_67min\_V3.lib

SI:38 Formula:C23H40O2Si CAS:506-32-1 MolWeight:376 RetIndex:2381

CompName:Arachidonic acid-TMS ; (5Z,8Z,11Z,14Z)-icosa-5,8,11,14-tetraenoic acid

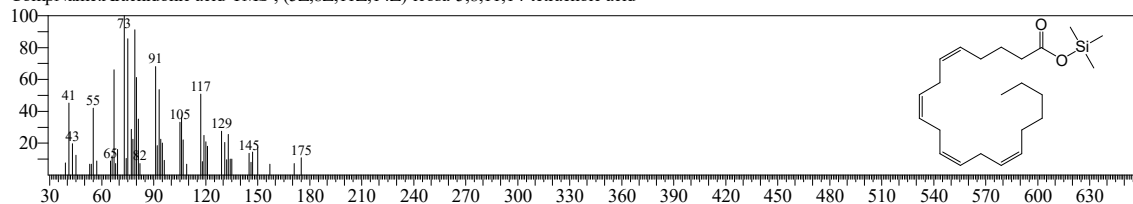

Hit#:3 Entry:509 Library:OA\_TMS\_DB5\_67min\_V3.lib

SI:37 Formula:C23H38O2Si CAS:10417-94-4 MolWeight:374 RetIndex:2389

CompName:Eicosapentaenoic acid-TMS ; icosa-5,8,11,14,17-pentaenoic acid

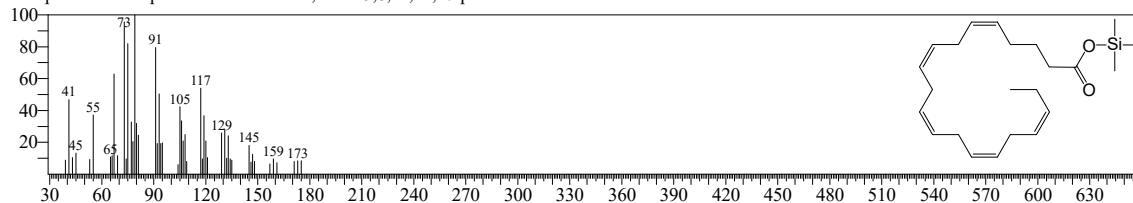

Hit#:4 Entry:38 Library:FA\_ME\_SP2560\_EI\_V3.lib

SI:37 Formula:C23H34O2 CAS:6217-54-5 MolWeight:342 RetIndex:3514

CompName:Methyl cis-4,7,10,13,16,19-Docosahexaenoate ; Docosa-4,7,10,13,16,19-hexaenoic acid

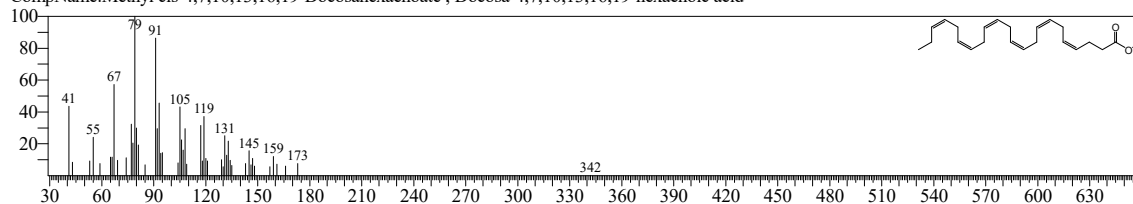

Hit#:5 Entry:534 Library:OA\_TMS\_DB5\_67min\_V3.lib

SI:35 Formula:C25H42O2Si CAS:24880-45-3 MolWeight:402 RetIndex:2591

CompName:Docosapentaenoic acid-TMS ; (7Z,10Z,13Z,16Z,19Z)-docosa-7,10,13,16,19-pentaenoic acid

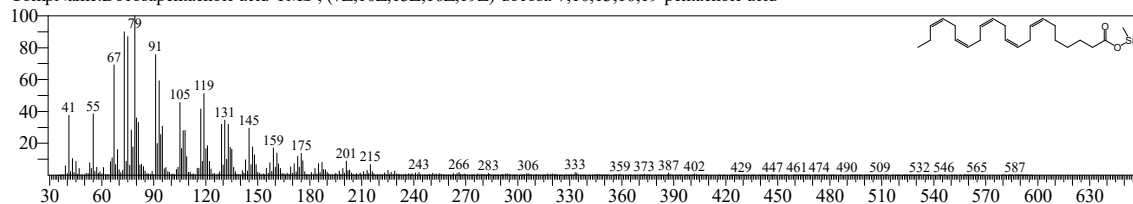

# TNAU

<< Target >>

Line#6 R.Time:12.500(Scan#:1501) MassPeaks:327

RawMode:Averaged 12.495-12.505(1500-1502) BasePeak:138.05(27306)

BG Mode:Calc. from Peak Group 1 - Event 1 Q3 Scan

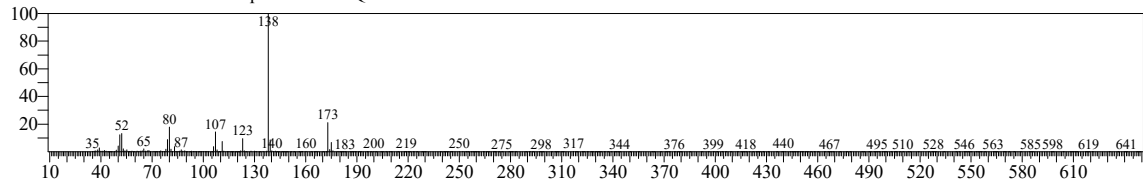

Hit#:1 Entry:11187 Library:NIST20M1.lib

SI:74 Formula:C7H6O3 CAS:533-31-3 MolWeight:138 RetIndex:1245

CompName:1,3-Benzodioxol-5-ol \$\$ Phenol, 3,4-(methylenedioxy)- \$\$ Sesamol \$\$ 3,4-(Methylenedioxy)phenol \$\$ 5-Hydroxy-1,3-benzodioxole \$\$ Methy

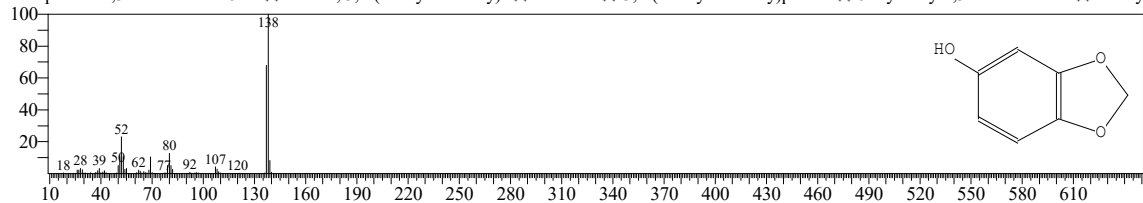

Hit#:2 Entry:8360 Library:NIST20R.lib

SI:73 Formula:C6H6N2O2 CAS:105-11-3 MolWeight:138 RetIndex:1349

CompName:2,5-Cyclohexadiene-1,4-dione, dioxime \$\$ p-Benzoquinone, dioxime \$\$ p-Quinone dioxime \$\$ p-Quinone oxime \$\$ Benzoquinone dioxime \$\$

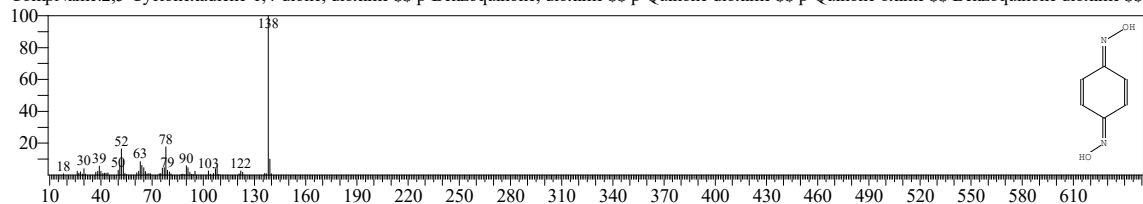

Hit#:3 Entry:11188 Library:NIST20M1.lib

SI:73 Formula:C7H6O3 CAS:69393-72-2 MolWeight:138 RetIndex:1245

CompName:2,3-Methylenedioxyphenol \$\$ 1,3-Benzodioxol-4-ol #

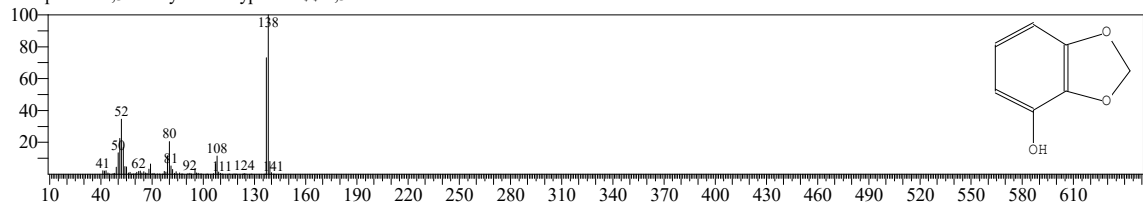

Hit#:4 Entry:36491 Library:NIST20M1.lib

SI:71 Formula:C9H8O4 CAS:326-58-9 MolWeight:180 RetIndex:1404

CompName:1,3-Benzodioxol-5-ol, acetate

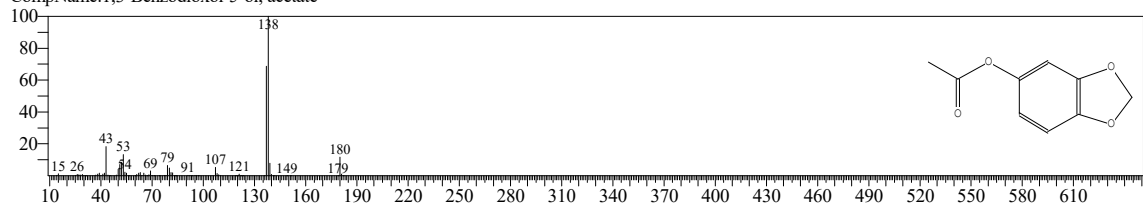

Hit#:5 Entry:8422 Library:NIST20R.lib

SI:71 Formula:C7H10N2O CAS:25680-58-4 MolWeight:138 RetIndex:1070

CompName:2-Ethyl-3-methoxypyrazine \$\$ 2-Methoxy-3-ethylpyrazine \$\$ Pyrazine, 2-ethyl-3-methoxy- \$\$ 3-Ethyl-2-methoxypyrazine \$\$ Pyrazine, 3-ethyl-

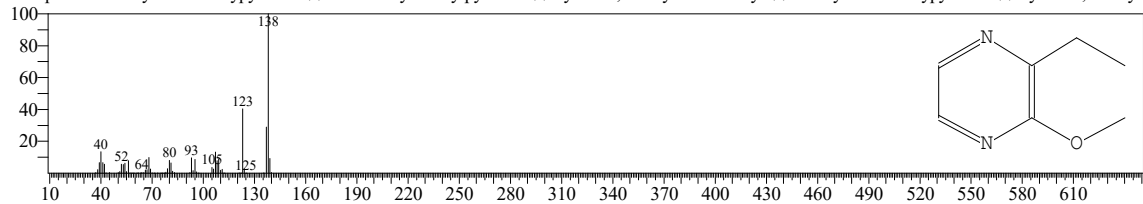

# TNAU

<< Target >>

Line#:7 R.Time:12.830(Scan#:1567) MassPeaks:346

RawMode:Averaged 12.825-12.835(1566-1568) BasePeak:138.05(40451)

BG Mode:Calc. from Peak Group 1 - Event 1 Q3 Scan

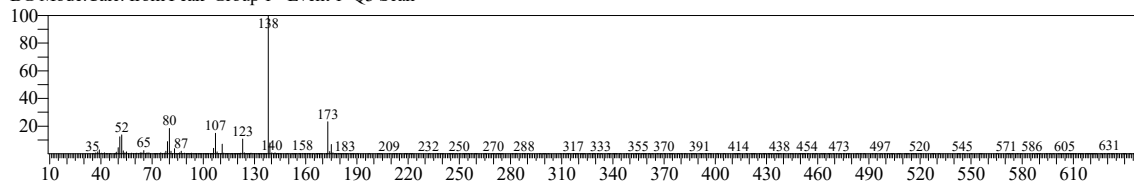

Hit#:1 Entry:8360 Library:NIST20R.lib

SI:73 Formula:C6H6N2O2 CAS:105-11-3 MolWeight:138 RetIndex:1349

CompName:2,5-Cyclohexadiene-1,4-dione, dioxime \$\$ p-Benzoquinone, dioxime \$\$ p-Quinone dioxime \$\$ p-Quinone oxime \$\$ Benzoquinone dioxime \$\$

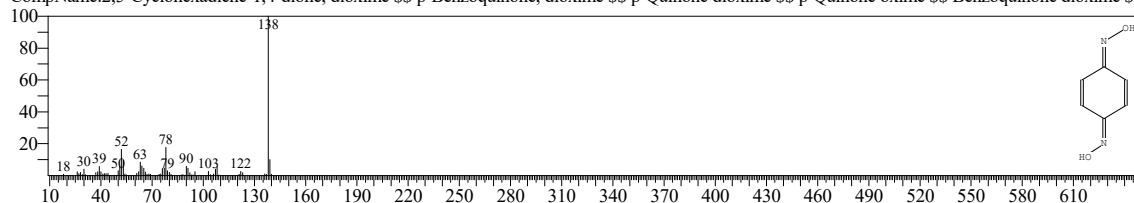

Hit#:2 Entry:11222 Library:NIST20M1.lib

SI:71 Formula:C7H10N2O CAS:3471-32-7 MolWeight:138 RetIndex:1325

CompName:Hydrazine, (4-methoxyphenyl)- \$\$ (p-Methoxyphenyl)hydrazine \$\$ 1-(4-Methoxyphenyl)hydrazine #

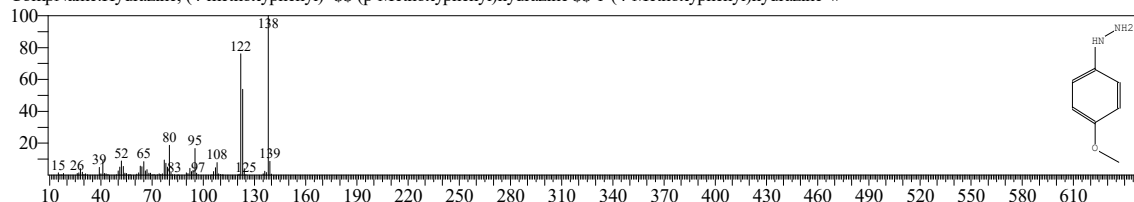

Hit#:3 Entry:25 Library:FA\_ME\_SP2560\_EI\_V3.lib

SI:34 Formula:C19H32O2 CAS:463-40-1 MolWeight:292 RetIndex:2892

CompName:Methyl linolenate ; (9Z,12Z,15Z)-octadeca-9,12,15-trienoic acid

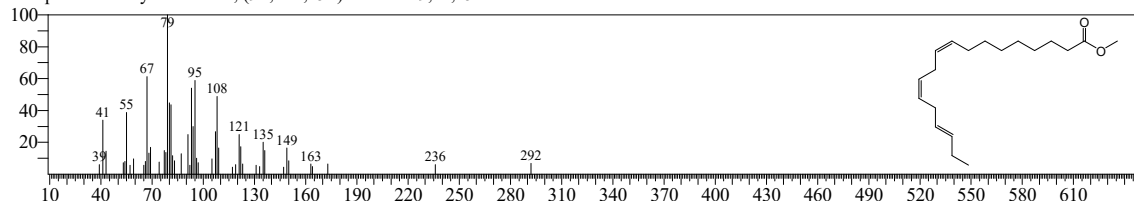

Hit#:4 Entry:21 Library:FA\_ME\_SP2560\_EI\_V3.lib

SI:33 Formula:C19H34O2 CAS:60-33-3 MolWeight:294 RetIndex:2775

CompName:Methyl linoleate ; Octadeca-9,12-dienoic acid

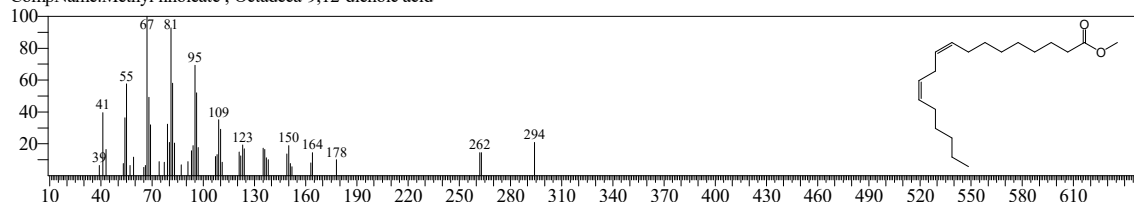

Hit#:5 Entry:20 Library:FA\_ME\_SP2560\_EI\_V3.lib

SI:32 Formula:C19H34O2 CAS:506-21-8 MolWeight:294 RetIndex:2727

CompName:Methyl linolelaidate ; (9E,12E)-octadeca-9,12-dienoic acid

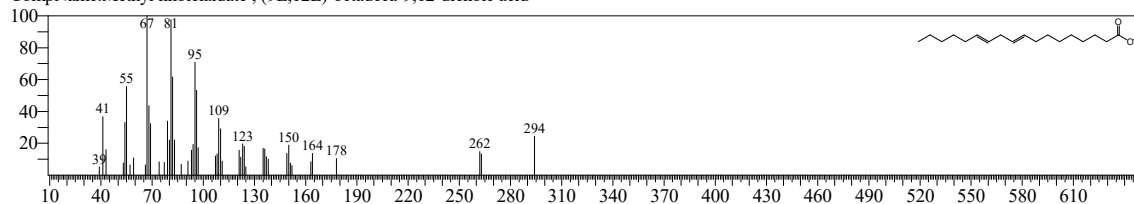



# TNAU

<< Target >>

Line#:8 R.Time:13.365(Scan#:1674) MassPeaks:357

RawMode:Averaged 13.360-13.370(1673-1675) BasePeak:155.05(32082)

BG Mode:Calc. from Peak Group 1 - Event 1 Q3 Scan

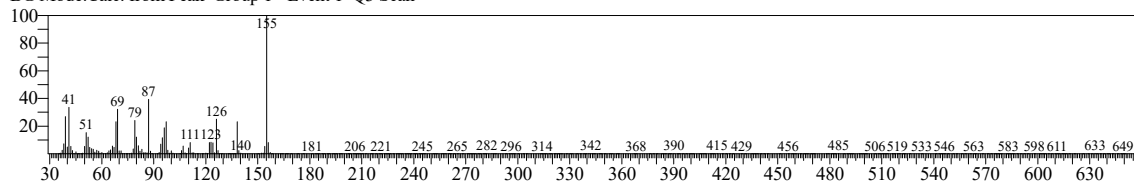

Hit#:1 Entry:34 Library:FA\_ME\_SP2560\_EI\_V3.lib

SI:51 Formula:C23H42O2 CAS:7370-49-2 MolWeight:350 RetIndex:3169

CompName:Methyl cis-13,16-Docosadienate ; (13Z,16E)-docosa-13,16-dienoic acid

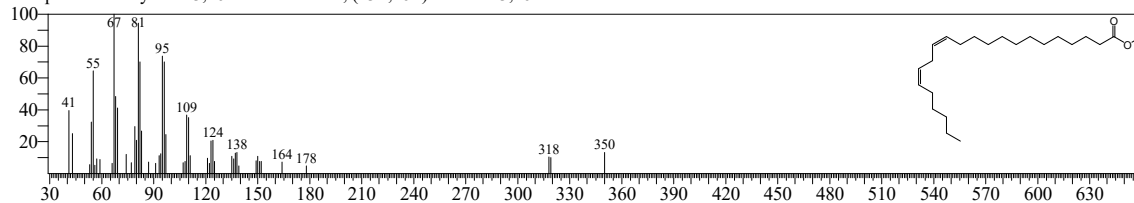

Hit#:2 Entry:11 Library:FA\_ME\_SP2560\_EI\_V3.lib

SI:51 Formula:C16H30O2 CAS:84743-29-3 MolWeight:254 RetIndex:2388

CompName:Methyl cis-10-pentadecenoate ; (Z)-pentadec-10-enoic acid

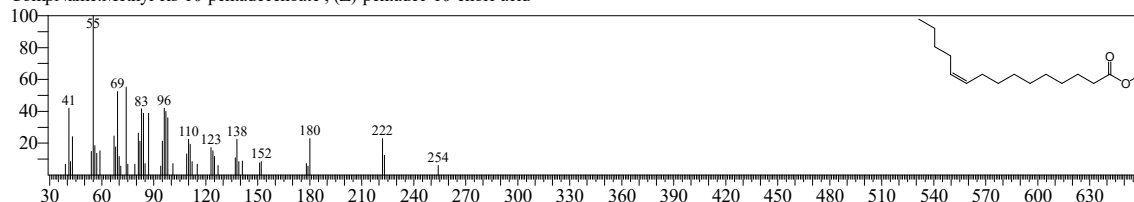

Hit#:3 Entry:21 Library:FA\_ME\_SP2560\_EI\_V3.lib

SI:50 Formula:C19H34O2 CAS:60-33-3 MolWeight:294 RetIndex:2775

CompName:Methyl linoleate ; Octadeca-9,12-dienoic acid

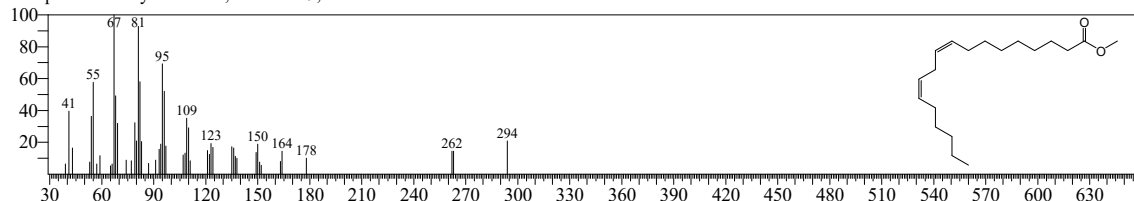

Hit#:4 Entry:20 Library:FA\_ME\_SP2560\_EI\_V3.lib

SI:50 Formula:C19H34O2 CAS:506-21-8 MolWeight:294 RetIndex:2727

CompName:Methyl linoleate ; (9E,12E)-octadeca-9,12-dienoic acid

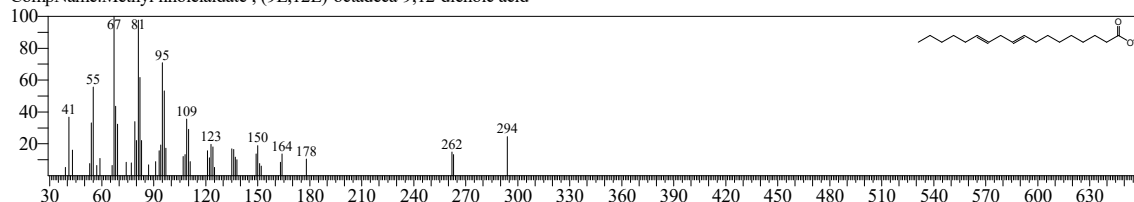

Hit#:5 Entry:27 Library:FA\_ME\_SP2560\_EI\_V3.lib

SI:49 Formula:C21H38O2 CAS:2091-39-6 MolWeight:322 RetIndex:2973

CompName:Methyl cis-11,14-Icosadienate ; ; Icosa-11,14-dienoic acid

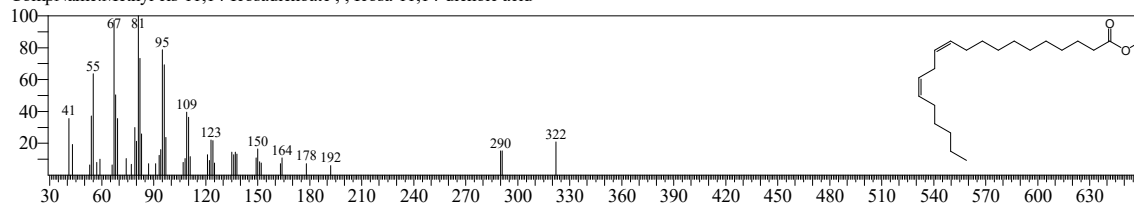

# TNAU

<< Target >>

Line#:9 R.Time:13.555(Scan#:1712) MassPeaks:348

RawMode:Averaged 13.550-13.560(1711-1713) BasePeak:155.05(26021)

BG Mode:Calc. from Peak Group 1 - Event 1 Q3 Scan

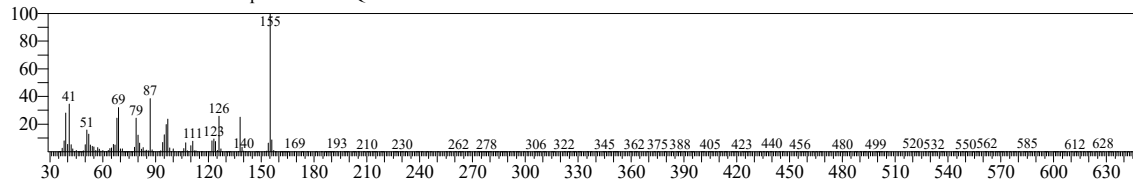

Hit#:1 Entry:34 Library:FA\_ME\_SP2560\_EI\_V3.lib

SI:53 Formula:C23H42O2 CAS:7370-49-2 MolWeight:350 RetIndex:3169

CompName:Methyl cis-13,16-Docosadienate ; (13Z,16E)-docosa-13,16-dienoic acid

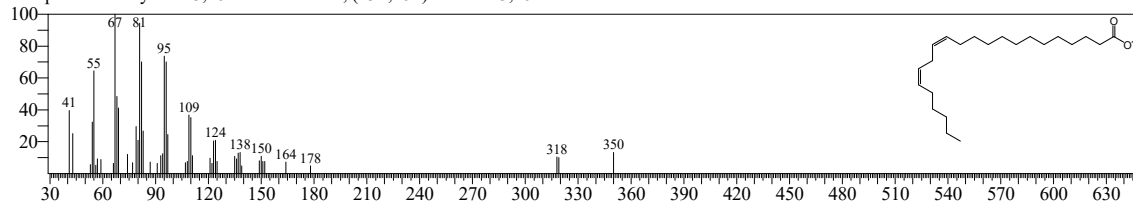

Hit#:2 Entry:21 Library:FA\_ME\_SP2560\_EI\_V3.lib

SI:52 Formula:C19H34O2 CAS:60-33-3 MolWeight:294 RetIndex:2775

CompName:Methyl linoleate ; Octadeca-9,12-dienoic acid

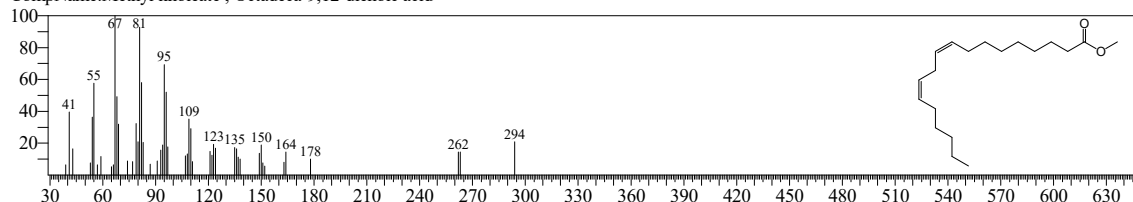

Hit#:3 Entry:20 Library:FA\_ME\_SP2560\_EI\_V3.lib

SI:52 Formula:C19H34O2 CAS:506-21-8 MolWeight:294 RetIndex:2727

CompName:Methyl linolelaidate ; (9E,12E)-octadeca-9,12-dienoic acid

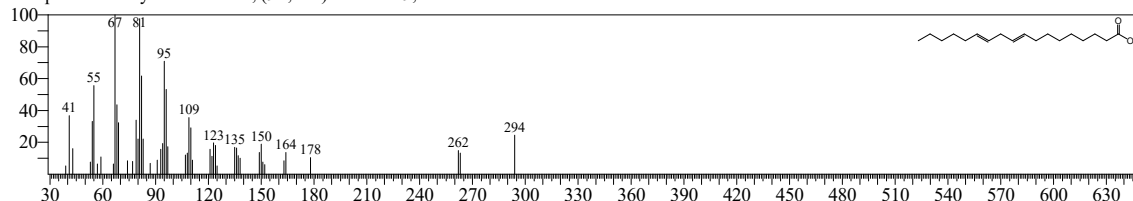

Hit#:4 Entry:11 Library:FA\_ME\_SP2560\_EI\_V3.lib

SI:52 Formula:C16H30O2 CAS:84743-29-3 MolWeight:254 RetIndex:2388

CompName:Methyl cis-10-pentadecenoate ; (Z)-pentadec-10-enoic acid

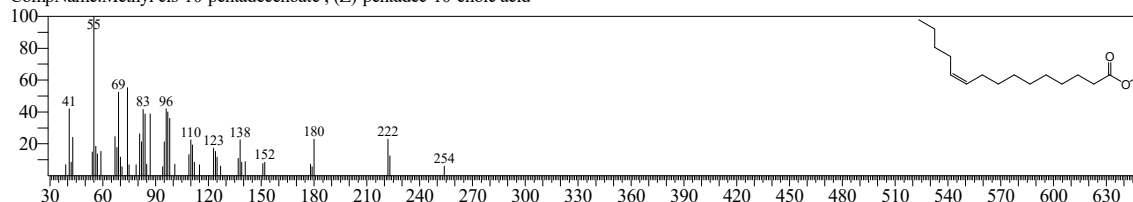

Hit#:5 Entry:27 Library:FA\_ME\_SP2560\_EI\_V3.lib

SI:51 Formula:C21H38O2 CAS:2091-39-6 MolWeight:322 RetIndex:2973

CompName:Methyl cis-11,14-Icosadienoate ; ; Icosa-11,14-dienoic acid

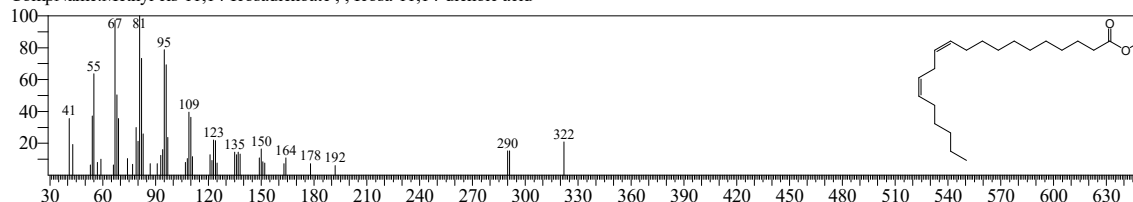

# TNAU

<< Target >>

Line#:10 R.Time:13.815(Scan#:1764) MassPeaks:384

RawMode:Averaged 13.810-13.820(1763-1765) BasePeak:221.10(1807)

BG Mode:Calc. from Peak Group 1 - Event 1 Q3 Scan

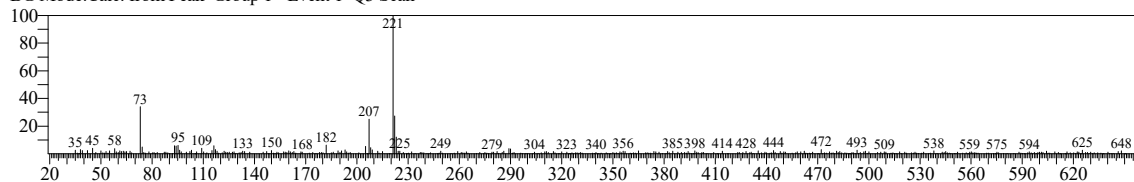

Hit#:1 Entry:28950 Library:NIST20R.lib

SI:72 Formula:C8H24O2Si3 CAS:107-51-7 MolWeight:236 RetIndex:698

CompName:Trisiloxane, octamethyl- \$\$ Octamethyltrisiloxane \$\$ Silane, dimethylbis(trimethylsiloxy)- \$\$ 1,1,1,3,3,5,5,5-Octamethyltrisiloxane \$\$ [(CH3)3

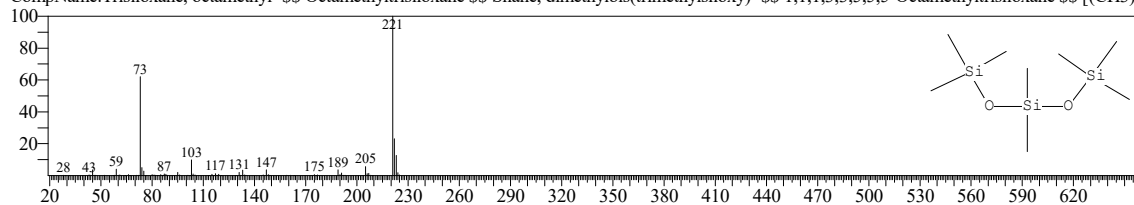

Hit#:2 Entry:3 Library:OA\_TMS\_DB5\_67min\_V3.lib

SI:53 Formula:C9H27BO3Si3 CAS:10043-35-3 MolWeight:278 RetIndex:992

CompName:Boric acid-3TMS ; boric acid

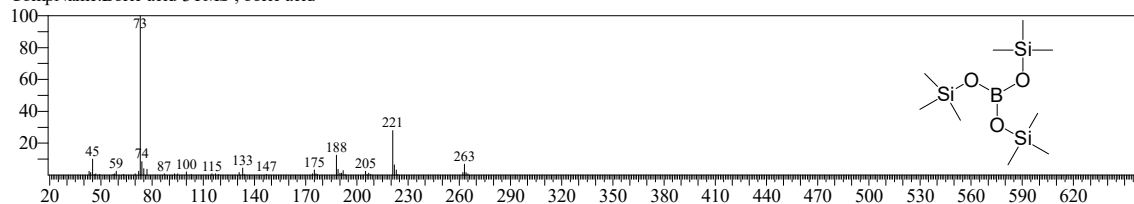

Hit#:3 Entry:6 Library:OA\_TMS\_DB5\_67min\_V3.lib

SI:45 Formula:C5H9Cl3O2Si CAS:76-03-9 MolWeight:234 RetIndex:1059

CompName:Trichloroacetic acid-TMS ; 2,2,2-trichloroacetic acid

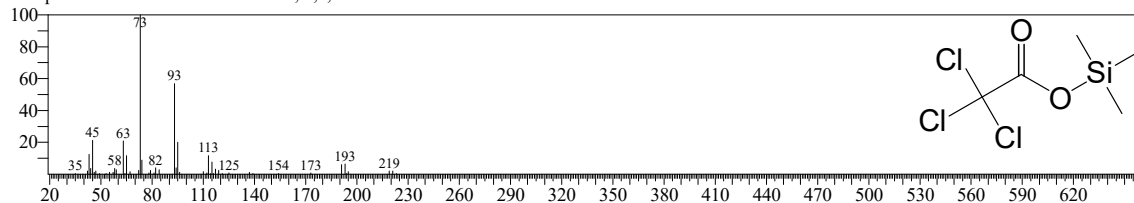

Hit#:4 Entry:528 Library:OA\_TMS\_DB5\_67min\_V3.lib

SI:39 Formula:C17H28Cl2N2O5Si2 CAS:56-75-7 MolWeight:466 RetIndex:2508

CompName:Chloramphenicol-2TMS ; 2,2-dichloro-N-[(1R,2R)-1,3-dihydroxy-1-(4-nitrophenyl)propan-2-yl]acetamide

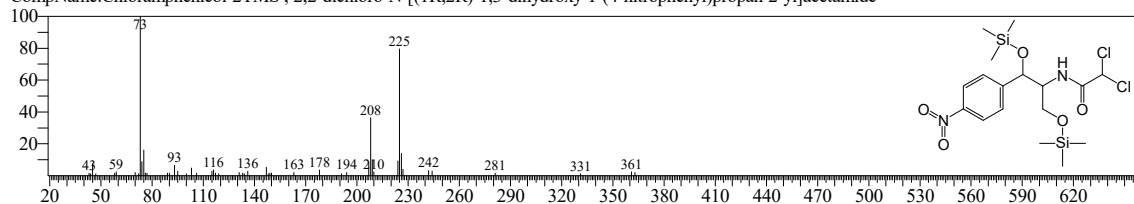

Hit#:5 Entry:283 Library:OA\_TMS\_DB5\_67min\_V3.lib

SI:38 Formula:C19H47NO5Si4 CAS:3615-37-0 MolWeight:481 RetIndex:1754

CompName:Fucose-meto-4TMS(1) ; (2S,3R,4S,5R,6R)-6-methyloxane-2,3,4,5-tetrol

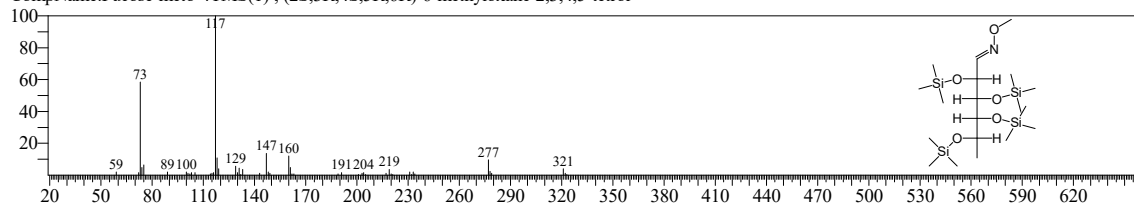

# TNAU

<< Target >>

Line#:11 R.Time:18.085(Scan#:2618) MassPeaks:356

RawMode:Averaged 18.080-18.090(2617-2619) BasePeak:60.00(2594)

BG Mode:Calc. from Peak Group 1 - Event 1 Q3 Scan

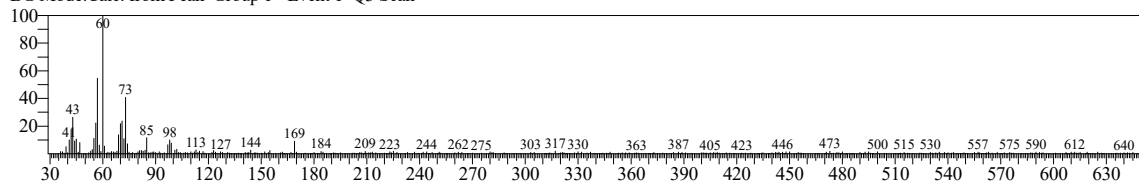

Hit#:1 Entry:13905 Library:NIST20R.lib

SI:88 Formula:C6H10O5 CAS:498-07-7 MolWeight:162 RetIndex:1404

CompName:.beta.-D-Glucopyranose, 1,6-anhydro- \$\$ Anhydro-d-mannosan \$\$ Levoglucosan \$\$ 1,6-Anhydro-.beta.-D-glucopyranose \$\$ 1,6-Anhydro-beta-

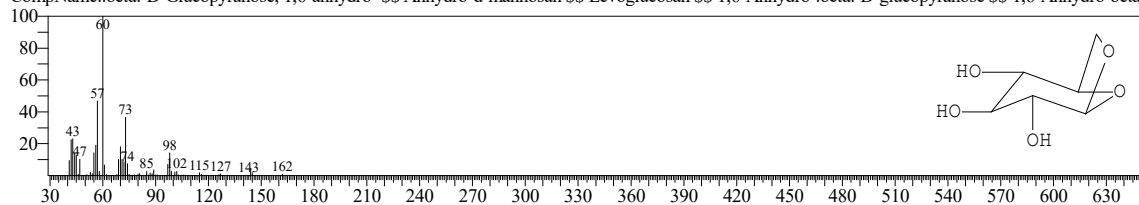

Hit#:2 Entry:36240 Library:NIST20M1.lib

SI:88 Formula:C6H12O6 CAS:2595-97-3 MolWeight:180 RetIndex:1698

CompName:D-Allose \$\$ .beta.-D-Allose \$\$ Hexose #

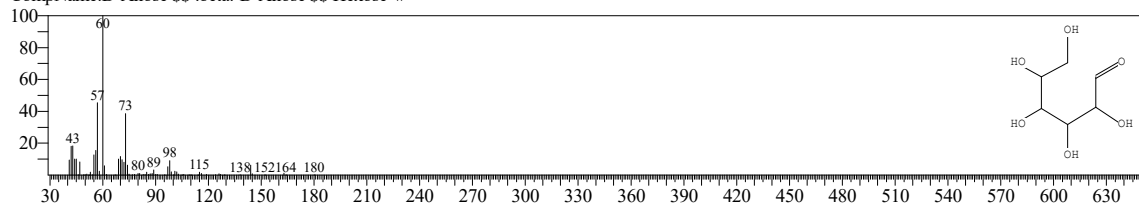

Hit#:3 Entry:23812 Library:NIST20M1.lib

SI:87 Formula:C6H10O5 CAS:0-00-0 MolWeight:162 RetIndex:1404

CompName:1,6-Anhydro-.beta.-d-talopyranose

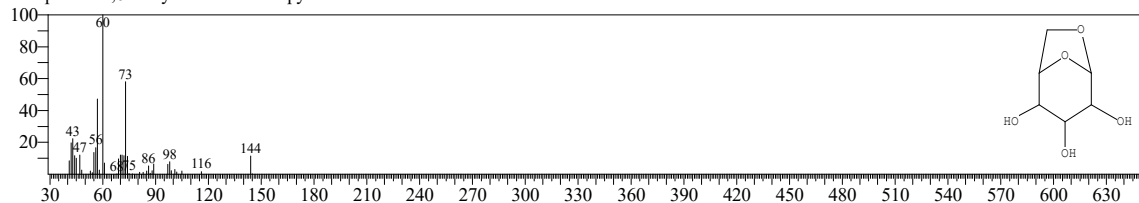

Hit#:4 Entry:23808 Library:NIST20M1.lib

SI:87 Formula:C6H10O5 CAS:0-00-0 MolWeight:162 RetIndex:1400

CompName:3,4-Altrosan \$\$ 3,4-Anhydrohexopyranose #

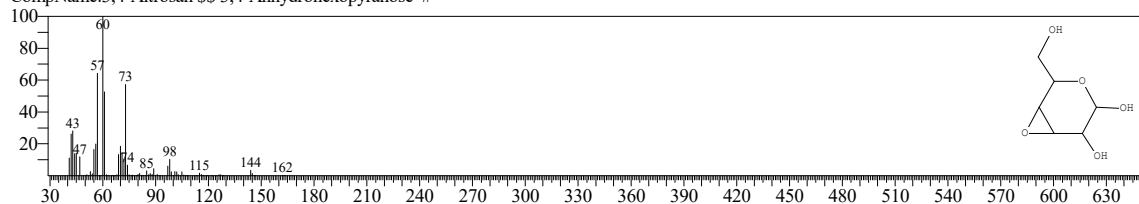

Hit#:5 Entry:9697 Library:NIST20M1.lib

SI:81 Formula:C5H10O4 CAS:14003-71-5 MolWeight:134 RetIndex:1352

CompName:1,2,3,4-Cyclopentanetetrol, (1.alpha.,2.beta.,3.beta.,4.alpha.)- \$\$ 1,2,3,4-Cyclopentanetetrol, stereoisomer \$\$ 1,2,3,4-Cyclopentanetetrol #

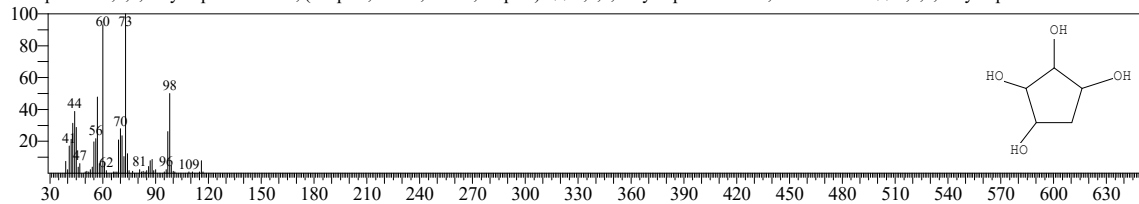

# TNAU

<< Target >>

Line#:12 R.Time:19.200(Scan#:2841) MassPeaks:410

RawMode:Averaged 19.195-19.205(2840-2842) BasePeak:263.15(3940)

BG Mode:Calc. from Peak Group 1 - Event 1 Q3 Scan

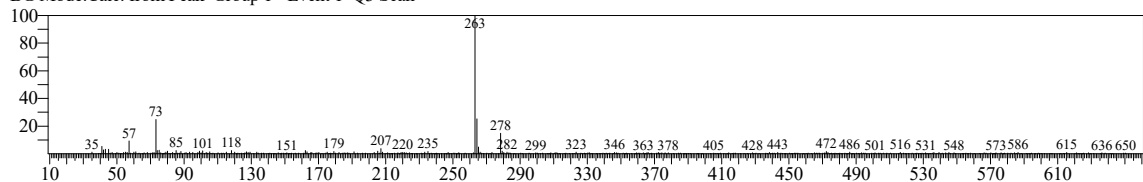

Hit#:1 Entry:137399 Library:NIST20M1.lib

SI:85 Formula:C17H30OSi CAS:53925-65-8 MolWeight:278 RetIndex:1632

CompName:2,4-Di-tert-butylphenoxytrimethylsilane \$\$ Benzene, 2,4-bis(1,1-dimethylethyl)-1-[(trimethylsilyl)oxy]- \$\$ Silane, [2,4-bis(1,1-dimethylethyl)ph

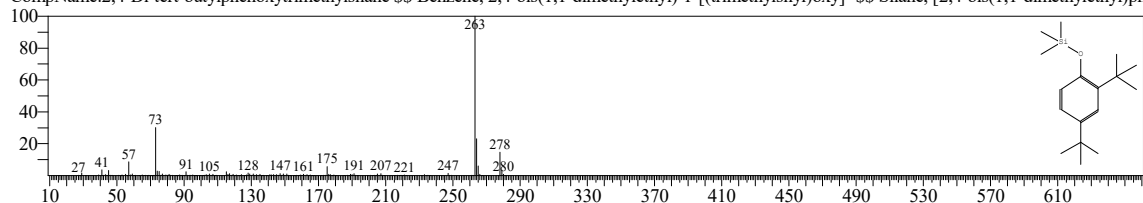

Hit#:2 Entry:136557 Library:NIST20M1.lib

SI:78 Formula:C12H22N4Si2 CAS:0-00-0 MolWeight:278 RetIndex:1703

CompName:3-Deazaadenine, 2TMS \$\$ 3-Deazaadenine, N,N'-bis-TMS \$\$ 1H-Imidazo[4,5-c]pyridin-4-amine, N,N'-bis-TMS

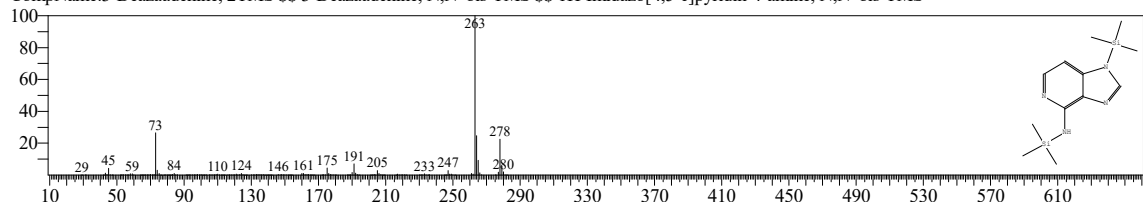

Hit#:3 Entry:33871 Library:NIST20R.lib

SI:78 Formula:C17H30OSi CAS:10416-73-6 MolWeight:278 RetIndex:1632

CompName:2,6-Bis(tert-butyl)phenol, TMS derivative \$\$ Trimethyl(2,6 ditert-butylphenoxy)silane \$\$ (2,6-Ditert-butylphenoxy)(trimethyl)silane #

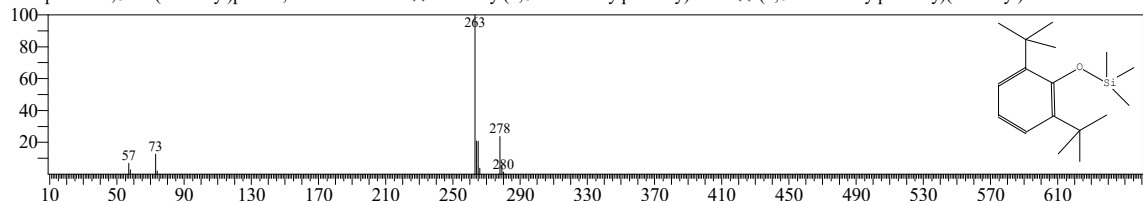

Hit#:4 Entry:136556 Library:NIST20M1.lib

SI:75 Formula:C12H22N4Si2 CAS:0-00-0 MolWeight:278 RetIndex:1606

CompName:1H,1'H-2,2'-Biimidazole, 2TMS \$\$ 1H,1'H-2,2'-Biimidazole, N,N'-bis-TMS \$\$ 1H,1'H-[2,2']Biimidazolyl, 2TMS \$\$ 2,2'-Bi-1H-imidazole, 2TMS

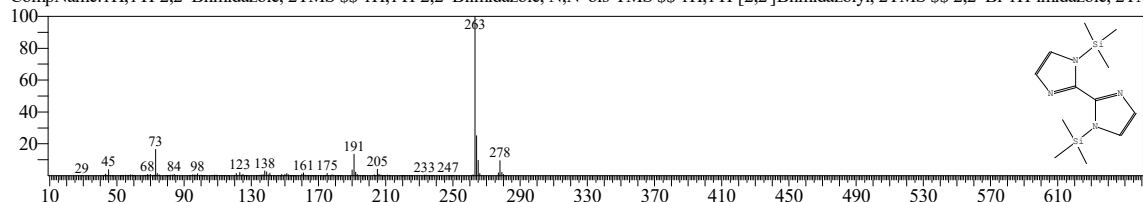

Hit#:5 Entry:137020 Library:NIST20M1.lib

SI:74 Formula:C15H22O3Si CAS:0-00-0 MolWeight:278 RetIndex:1736

CompName:6-Methoxy-2,2-dimethyl-2,3-dihydro-4H-chromen-4-one, TMS \$\$ 6-Methoxy-2,2-dimethyl-chroman-4-one, O-trimethylsilyl- \$\$ 4H-1-Benzopy

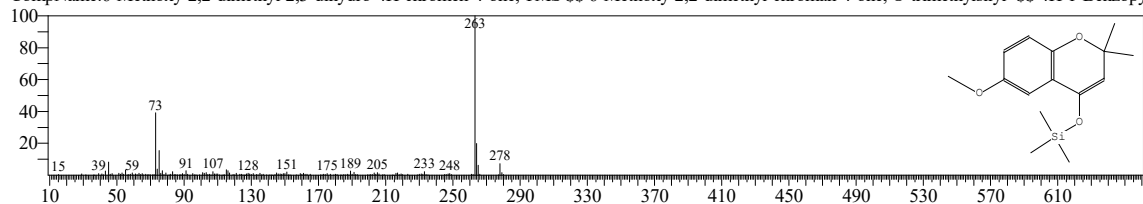

# TNAU

<< Target >>

Line#:13 R.Time:28.305(Scan#:4662) MassPeaks:381

RawMode:Averaged 28.300-28.310(4661-4663) BasePeak:73.05(7724)

BG Mode:Calc. from Peak Group 1 - Event 1 Q3 Scan

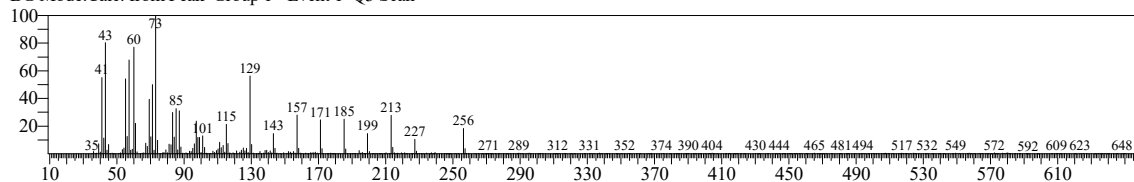

Hit#:1 Entry:31600 Library:NIST20R.lib

SI:95 Formula:C16H32O2 CAS:57-10-3 MolWeight:256 RetIndex:1968

CompName:n-Hexadecanoic acid \$\$ Hexadecanoic acid \$\$ n-Hexadecanoic acid \$\$ Palmitic acid \$\$ Pentadecanecarboxylic acid \$\$ 1-Pentadecanecarboxylic

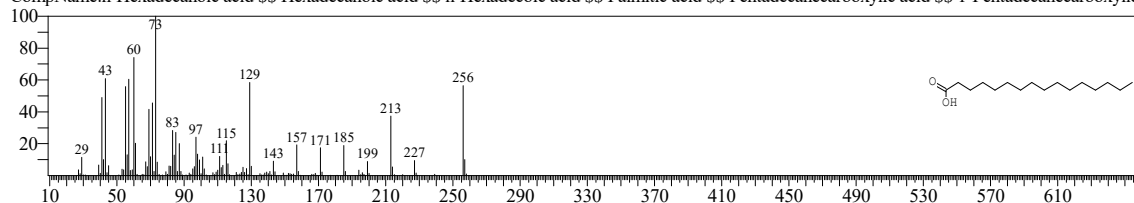

Hit#:2 Entry:29890 Library:NIST20R.lib

SI:92 Formula:C15H30O2 CAS:1002-84-2 MolWeight:242 RetIndex:1869

CompName:Pentadecanoic acid \$\$ Pentadecylic acid \$\$ n-Pentadecanoic acid \$\$ n-Pentadecylic acid

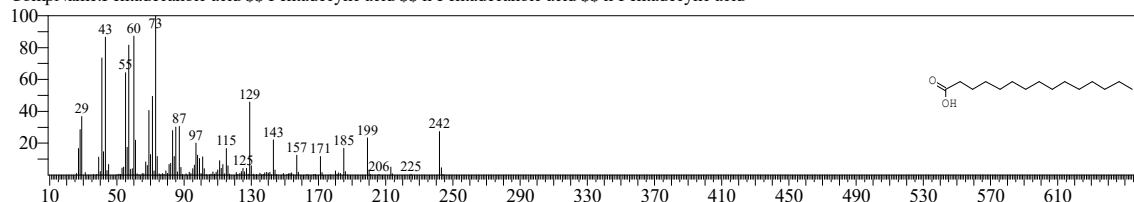

Hit#:3 Entry:44286 Library:NIST20M2.lib

SI:91 Formula:C38H68O8 CAS:28474-90-0 MolWeight:652 RetIndex:4765

CompName:l-(+)-Ascorbic acid 2,6-dihexadecanoate

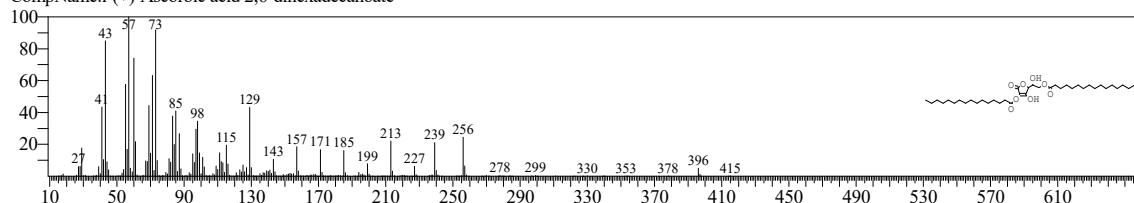

Hit#:4 Entry:25643 Library:NIST20R.lib

SI:90 Formula:C13H26O2 CAS:638-53-9 MolWeight:214 RetIndex:1670

CompName:Tridecanoic acid \$\$ n-Tridecanoic acid \$\$ n-Tridecoic acid \$\$ Tridecylic acid

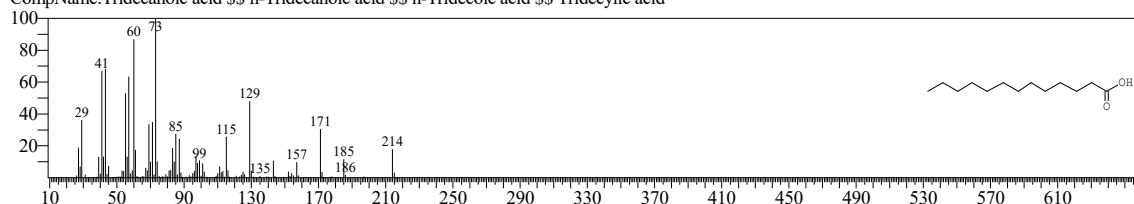

Hit#:5 Entry:144781 Library:NIST20M1.lib

SI:90 Formula:C18H36O2 CAS:57-11-4 MolWeight:284 RetIndex:2167

CompName:Octadecanoic acid \$\$ Stearic acid \$\$ n-Octadecanoic acid \$\$ Humko Industriene R \$\$ Hydrofol Acid 150 \$\$ Hystrene S-97 \$\$ Hystrene T-70 \$

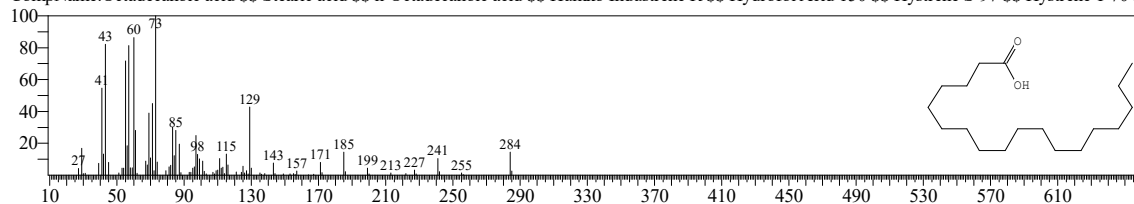

# TNAU

<< Target >>

Line#:14 R.Time:31.480(Scan#:5297) MassPeaks:377

RawMode:Averaged 31.475-31.485(5296-5298) BasePeak:67.10(5024)

BG Mode:Calc. from Peak Group 1 - Event 1 Q3 Scan

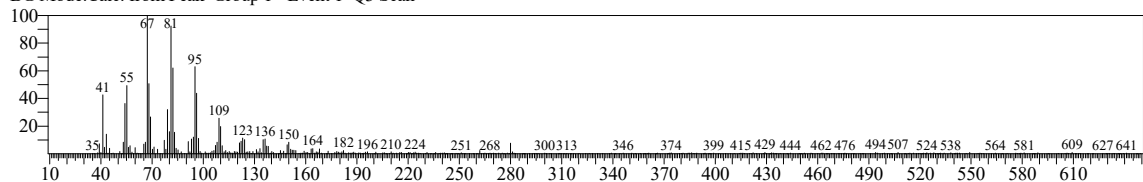

Hit#:1 Entry:34035 Library:NIST20R.lib

SI:94 Formula:C18H32O2 CAS:60-33-3 MolWeight:280 RetIndex:2183

CompName:9,12-Octadecadienoic acid (Z,Z)- \$\$ cis-9,cis-12-Octadecadienoic acid \$\$ cis,cis-Linoleic acid \$\$ Grape seed oil \$\$ Linoleic acid \$

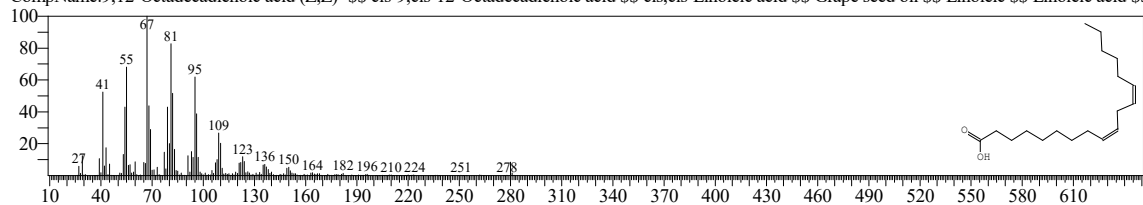

Hit#:2 Entry:139646 Library:NIST20M1.lib

SI:94 Formula:C18H32O2 CAS:2420-56-6 MolWeight:280 RetIndex:2183

CompName:10E,12Z-Octadecadienoic acid

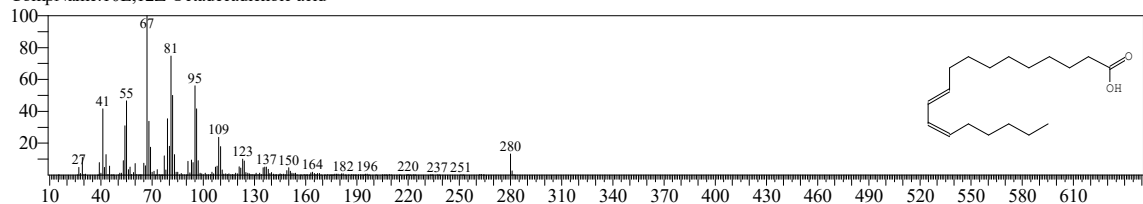

Hit#:3 Entry:139651 Library:NIST20M1.lib

SI:94 Formula:C18H32O2 CAS:544-71-8 MolWeight:280 RetIndex:2183

CompName:(9E,11E)-Octadecadienoic acid

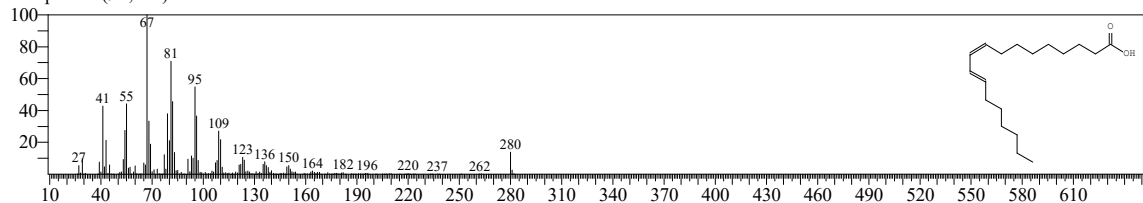

Hit#:4 Entry:139661 Library:NIST20M1.lib

SI:93 Formula:C18H32O2 CAS:506-21-8 MolWeight:280 RetIndex:2183

CompName:Linoelaidic acid

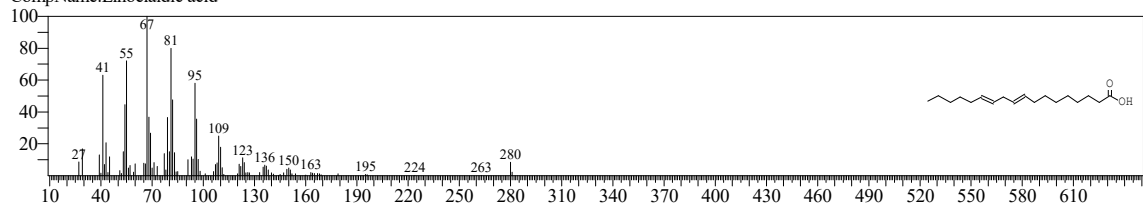

Hit#:5 Entry:173215 Library:NIST20M1.lib

SI:93 Formula:C20H36O2 CAS:2091-39-6 MolWeight:308 RetIndex:2382

CompName:11,14-Eicosadienoic acid

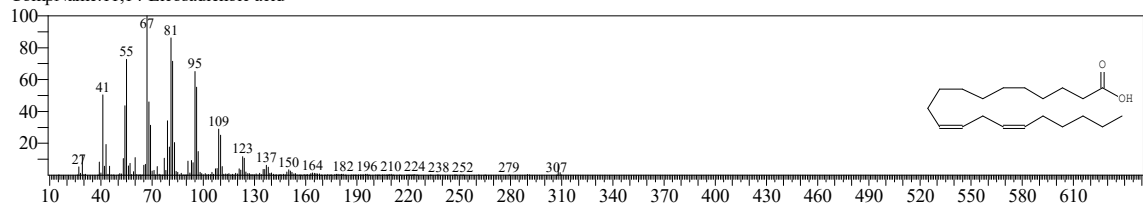

# TNAU

<< Target >>

Line#:15 R.Time:31.590(Scan#:5319) MassPeaks:425

RawMode:Averaged 31.585-31.595(5318-5320) BasePeak:55.05(2649)

BG Mode:Calc. from Peak Group 1 - Event 1 Q3 Scan

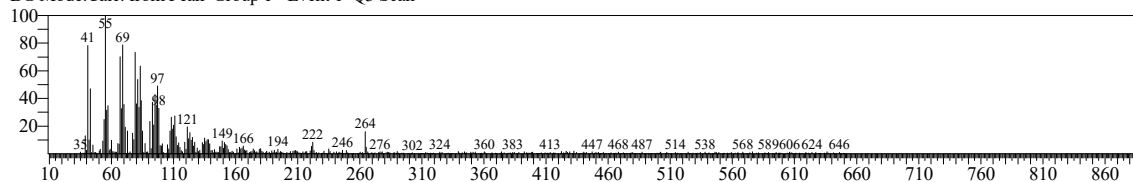

Hit#:1 Entry:92244 Library:NIST20M1.lib

SI:89 Formula:C16H30O CAS:56219-04-6 MolWeight:238 RetIndex:1808

CompName:cis-9-Hexadecenal \$\$ 9-Hexadecenal, (Z)- \$\$ (Z)-9-Hexadecenal \$\$ Z-9-Hexadecenal \$\$ (9Z)-9-Hexadecenal #

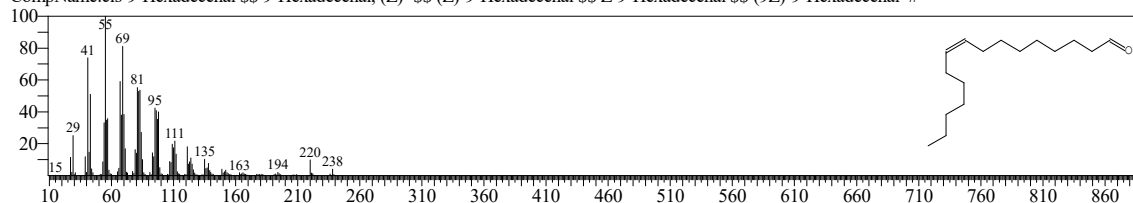

Hit#:2 Entry:123421 Library:NIST20M1.lib

SI:88 Formula:C18H34O CAS:2423-10-1 MolWeight:266 RetIndex:2007

CompName:9-Octadecenal, (Z)- \$\$ Olealdehyde \$\$ cis-9-Octadecenal \$\$ Oleylaldehyde \$\$ Z-9-Octadecenal \$\$ (9Z)-9-Octadecenal #

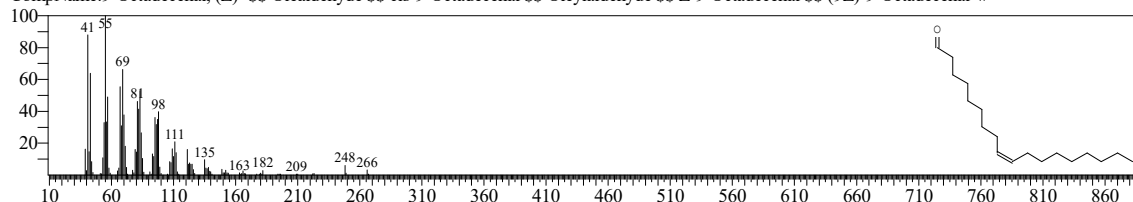

Hit#:3 Entry:63176 Library:NIST20M1.lib

SI:88 Formula:C14H26O CAS:65128-96-3 MolWeight:210 RetIndex:1609

CompName:7-Tetradecenal, (Z)- \$\$ Z-7-Tetradecenal \$\$ (7Z)-7-Tetradecenal #

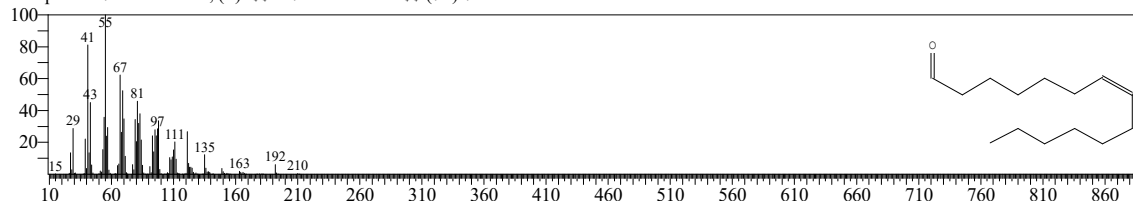

Hit#:4 Entry:46357 Library:NIST20M2.lib

SI:88 Formula:C57H104O6 CAS:537-39-3 MolWeight:884 RetIndex:6149

CompName:9-Octadecenoic acid, 1,2,3-propanetriyl ester, (E,E,E)- \$\$ 2,3-Bis[(9E)-9-octadecenoyloxy]propyl (9E)-9-octadecenoate #

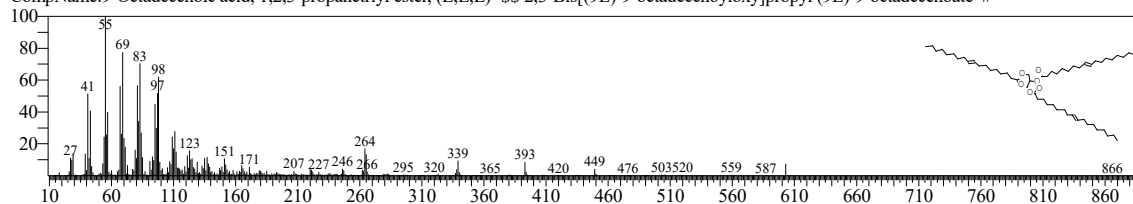

Hit#:5 Entry:156549 Library:NIST20M1.lib

SI:88 Formula:C19H34O2 CAS:0-00-0 MolWeight:294 RetIndex:2241

CompName:E,E,Z-1,3,12-Nonadecatriene-5,14-diol \$\$ (3E,12Z)-1,3,12-Nonadecatriene-5,14-diol #

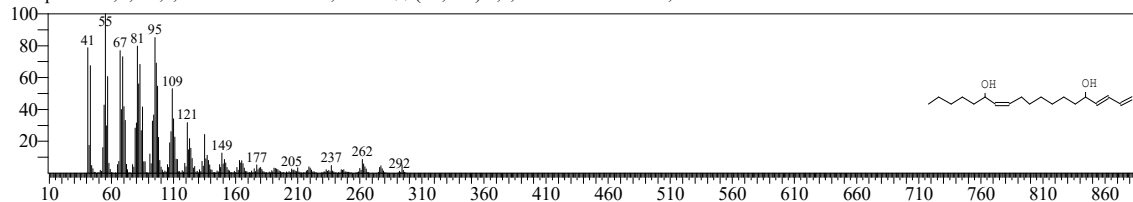



# TNAU

<< Target >>

Line#:16 R.Time:45.635(Scan#:8128) MassPeaks:396

RawMode:Averaged 45.630-45.640(8127-8129) BasePeak:139.10(3965)

BG Mode:Calc. from Peak Group 1 - Event 1 Q3 Scan

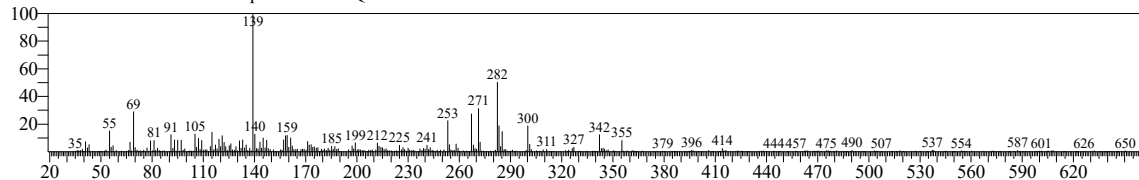

Hit#:1 Entry:8297 Library:NIST20M2.lib

SI:89 Formula:C27H42O3 CAS:512-04-9 MolWeight:414 RetIndex:2844

CompName:Diosgenin \$\$ Spirost-5-en-3-ol, (3.beta.,25R)- \$\$ Spirost-5-en-3.beta.-ol, (25R)- \$\$ Nitrogenin \$\$ 25D-spirost-5-en-3.beta.-ol \$\$ Spiro(8H-nap

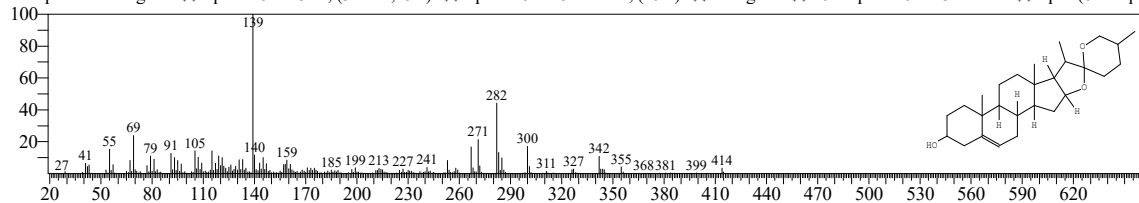

Hit#:2 Entry:14852 Library:NIST20M2.lib

SI:79 Formula:C28H44O3 CAS:116292-24-1 MolWeight:428 RetIndex:2793

CompName:Diosgenin methyl ether \$\$ Diosgenin Me derivative \$\$ (3.beta.,25R)-3-Methoxyspirost-5-ene \$\$ Spirost-5-ene, 3-methoxy-, (3.beta.,25R)-

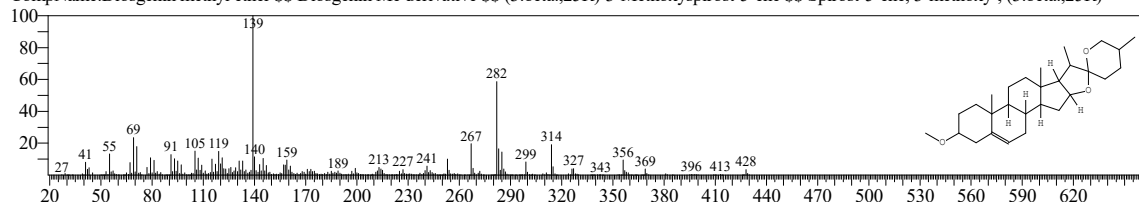

Hit#:3 Entry:41561 Library:NIST20R.lib

SI:79 Formula:C27H42O2 CAS:32277-73-9 MolWeight:398 RetIndex:2713

CompName:Des-N-solasodine \$\$ Furosta-5,20(22)-dien-3-ol #

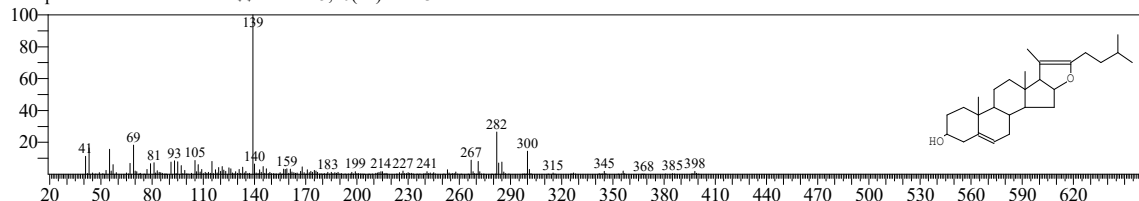

Hit#:4 Entry:24878 Library:NIST20M2.lib

SI:77 Formula:C29H44O4 CAS:1061-54-7 MolWeight:456 RetIndex:2984

CompName:Spirost-5-en-3-ol, acetate, (3.beta.,25R)- \$\$ Diosgenin acetate \$\$ Spirost-5-en-3.beta.-ol, acetate, (25R)- \$\$ Spirost-5-en-3.beta.-ol, acetate, (25R)-

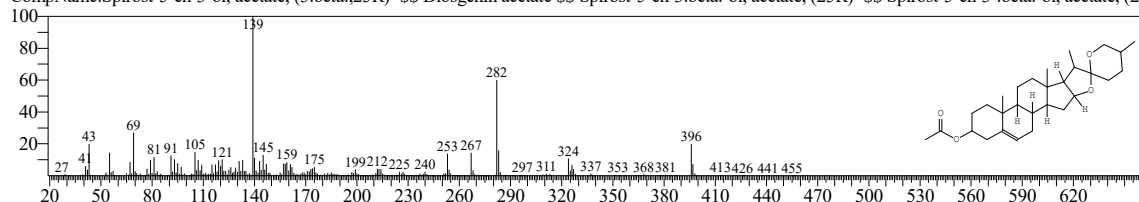

Hit#:5 Entry:42677 Library:NIST20R.lib

SI:72 Formula:C29H44O4 CAS:1180-12-7 MolWeight:456 RetIndex:2984

CompName:Neodiosgenin (3.beta.,25S) acetate \$\$ Spirost-5-en-3-ol, 3-acetate, (3.beta.,25S)- \$\$ Spirost-5-en-3-ol, acetate, (3.beta.,25S)- \$\$ Spirost-5-en-3-ol, acetate, (3.beta.,25S)-

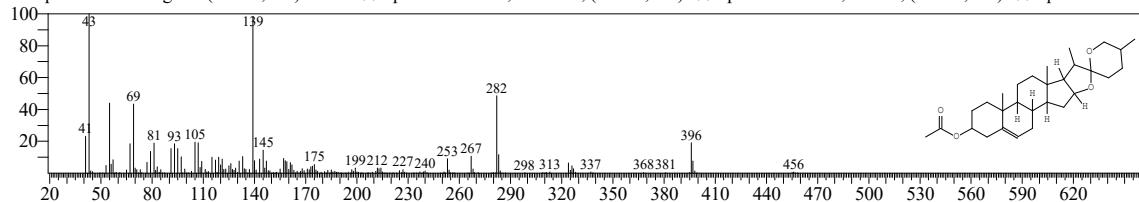

# TNAU

<< Target >>

Line#:17 R.Time:45.715(Scan#:8144) MassPeaks:283

RawMode:Averaged 45.710-45.720(8143-8145) BasePeak:157.10(44)

BG Mode:Calc. from Peak Group 1 - Event 1 Q3 Scan

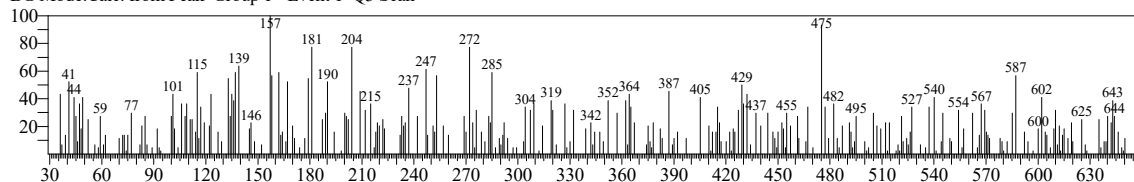

Hit#:1 Entry:276 Library:OA\_TMS\_DB5\_67min\_V3.lib

SI:16 Formula:C18H44O5Si4 CAS:154-17-6 MolWeight:452 RetIndex:1745

CompName:2-Deoxy-glucose-4TMS(1) ; (2S,4S,5S,6S)-6-(hydroxymethyl)oxane-2,4,5-triol

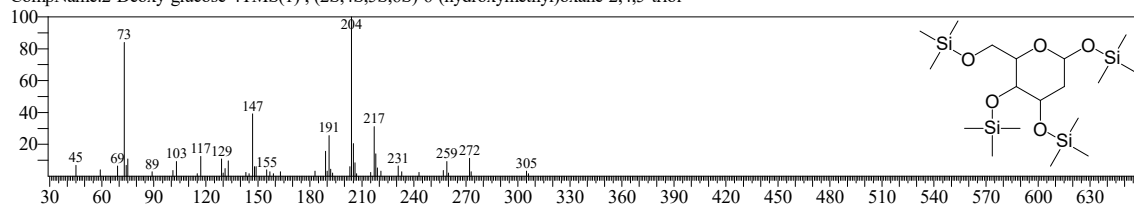

Hit#:2 Entry:66 Library:OA\_TMS\_DB5\_67min\_V3.lib

SI:15 Formula:C10H14O2Si CAS:65-85-0 MolWeight:194 RetIndex:1252

CompName:Benzoic acid-TMS ; benzoic acid

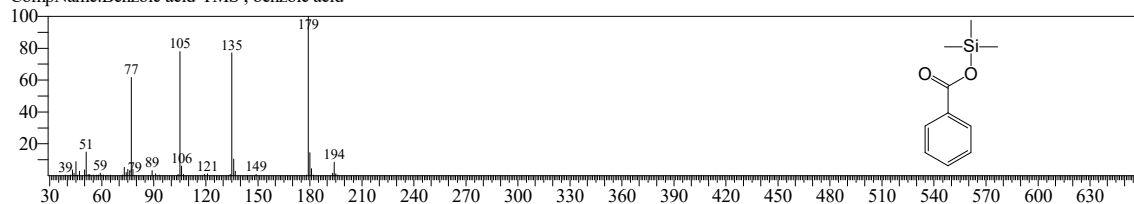

Hit#:3 Entry:219 Library:OA\_TMS\_DB5\_67min\_V3.lib

SI:14 Formula:C18H44O5Si4 CAS:10485-94-6 MolWeight:452 RetIndex:1646

CompName:Rhamnose-4TMS(1) ; (2R,3R,4S,5S)-2,3,4,5-tetrahydroxyhexanal

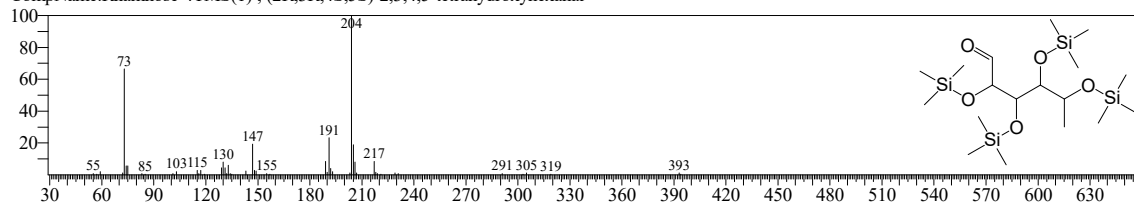

Hit#:4 Entry:252 Library:OA\_TMS\_DB5\_67min\_V3.lib

SI:13 Formula:C18H44O5Si4 CAS:3615-37-0 MolWeight:452 RetIndex:1695

CompName:Fucose-4TMS(1) ; (2S,3R,4S,5R,6R)-6-methyloxane-2,3,4,5-tetrol

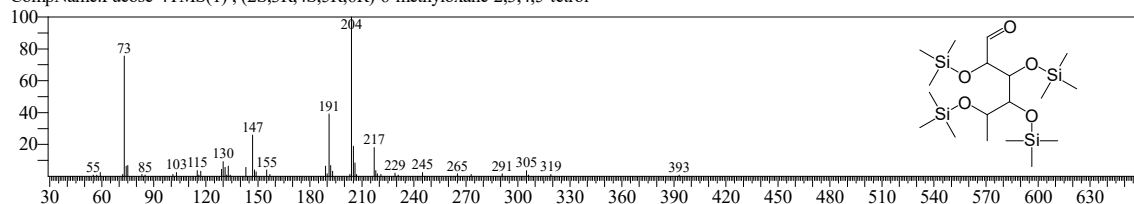

Hit#:5 Entry:395 Library:OA\_TMS\_DB5\_67min\_V3.lib

SI:13 Formula:C10H16N4O2Si CAS:58-55-9 MolWeight:252 RetIndex:1936

CompName:Theophylline-TMS ; 1,3-dimethyl-7H-purine-2,6-dione

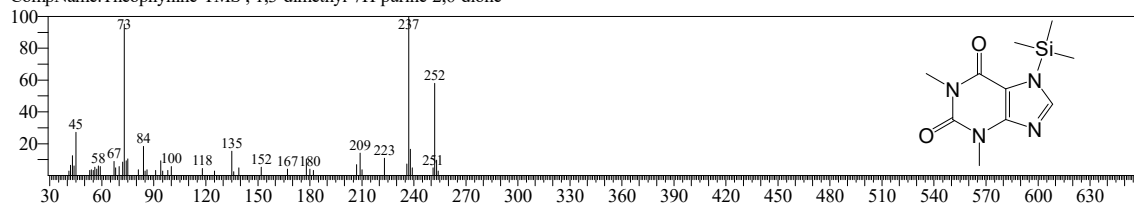

Supplement: Supplementary file 46 [file supplementary]
