# Supplementary material for: Comparative Metabolomics Profiling Reveals Key Metabolites and Associated Pathways Regulating Tuber Dormancy in White Yam (<em>Dioscorea rotundata</em>)
Source: Preprints.org preprint supplement (doi:10.20944/preprints202303.0378.v1), 2023-03-21

# TNAU

## Sample Information

Analyzed by : Admin  
 Analyzed : 03-Sep-22 12:21:22 AM  
 Sample Type : Unknown  
 Level # : 1  
 Sample Name : Sample  
 Sample ID : 12-2  
 IS Amount : [1]=1  
 Sample Amount : 1  
 Dilution Factor : 1  
 Vial # : 13  
 Injection Volume : 5.00  
 Data File : D:\GCMS-8040NX\Sep 2022\Users\01.09.2022\01092022036.qgd  
 Org Data File : D:\GCMS-8040NX\Sep 2022\Users\01.09.2022\01092022036.qgd  
 Method File : D:\GCMS-8040NX\Sep 2022\Method\Scan\_methodfile.qgm  
 Org Method File : D:\GCMS-8040NX\Sep 2022\Method\Scan\_methodfile.qgm  
 Report File :  
 Tuning File : D:\GCMS-8040NX\Aug 2022\Tuning Data\TUNING 25082022.qgt  
 Modified by : Admin  
 Modified : 05-Sep-22 11:12:52 AM

Chromatogram Sample D:\GCMS-8040NX\Sep 2022\Users\01.09.2022\01092022036.qgd

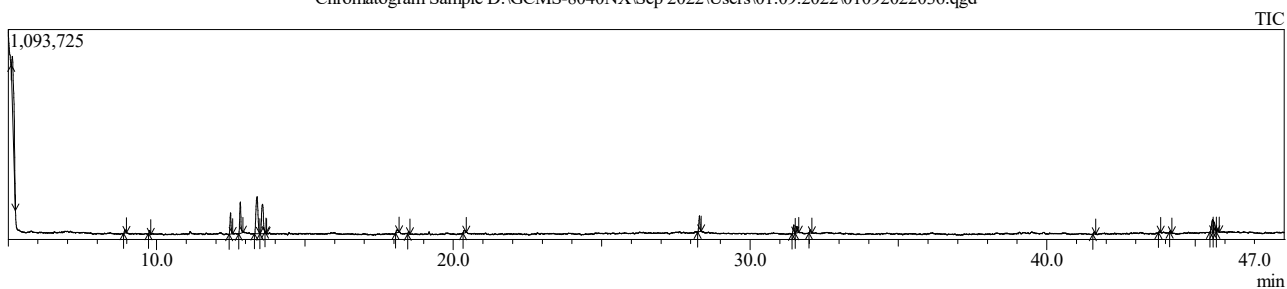

## Peak Report TIC

| Peak# | R.Time | Area    | Area%  | Height  | Height% | A/H  | Similarity | Name                                  |
|-------|--------|---------|--------|---------|---------|------|------------|---------------------------------------|
| 1     | 5.143  | 1466244 | 28.96  | 250900  | 19.46   | 5.84 | 98         | Pyridine                              |
| 2     | 8.927  | 51171   | 1.01   | 18493   | 1.43    | 2.77 | 81         | 1-Butanol, 3-methyl-, acetate         |
| 3     | 9.766  | 40390   | 0.80   | 18038   | 1.40    | 2.24 | 94         | Pentasiloxane, dodecamethyl-          |
| 4     | 12.492 | 278234  | 5.49   | 110000  | 8.53    | 2.53 | 73         | 2,5-Cyclohexadiene-1,4-dione, dioxime |
| 5     | 12.820 | 429474  | 8.48   | 162798  | 12.63   | 2.64 | 74         | 1,3-Benzodioxol-5-ol                  |
| 6     | 13.387 | 900538  | 17.78  | 191786  | 14.88   | 4.70 | 53         | Methyl cis-13,16-Docosadienate        |
| 7     | 13.568 | 689915  | 13.62  | 152594  | 11.84   | 4.52 | 53         | Methyl cis-13,16-Docosadienate        |
| 8     | 13.670 | 1405    | 0.03   | 2745    | 0.21    | 0.51 | 21         | Methyl palmitoleate                   |
| 9     | 18.113 | 58179   | 1.15   | 13934   | 1.08    | 4.18 | 92         | D-Allose                              |
| 10    | 18.495 | 30629   | 0.60   | 11310   | 0.88    | 2.71 | 90         | 2,4-Di-tert-butylphenol               |
| 11    | 20.371 | 51590   | 1.02   | 12518   | 0.97    | 4.12 | 80         | 1,6-Anhydro-.alpha.-d-galactofuranose |
| 12    | 28.294 | 213955  | 4.23   | 82508   | 6.40    | 2.59 | 95         | n-Hexadecanoic acid                   |
| 13    | 31.473 | 126405  | 2.50   | 45409   | 3.52    | 2.78 | 95         | 9,12-Octadecadienoic acid (Z,Z)-      |
| 14    | 31.581 | 103547  | 2.04   | 33741   | 2.62    | 3.07 | 88         | cis-9-Hexadecenal                     |
| 15    | 32.028 | 45661   | 0.90   | 16742   | 1.30    | 2.73 | 94         | Octadecanoic acid                     |
| 16    | 41.588 | 35853   | 0.71   | 11604   | 0.90    | 3.09 | 84         | Tetracosamethyl-cyclododecasiloxane   |
| 17    | 43.793 | 20879   | 0.41   | 8755    | 0.68    | 2.38 | 80         | Tetracosamethyl-cyclododecasiloxane   |
| 18    | 44.163 | 16512   | 0.33   | 8032    | 0.62    | 2.06 | 81         | 13-Docosenamide, (Z)-                 |
| 19    | 45.585 | 237265  | 4.69   | 67202   | 5.21    | 3.53 | 82         | Diosgenin                             |
| 20    | 45.615 | 223803  | 4.42   | 57963   | 4.50    | 3.86 | 27         | Urocanic acid-2TMS                    |
| 21    | 45.768 | 42176   | 0.83   | 12097   | 0.94    | 3.49 | 81         | Tetracosamethyl-cyclododecasiloxane   |
|       |        | 5063825 | 100.00 | 1289169 | 100.00  |      |            |                                       |

# TNAU

Library

<< Target >>

Line#:1 R.Time:5.145(Scan#:30) MassPeaks:346

RawMode:Averaged 5.140-5.150(29-31) BasePeak:79.05(104995)

BG Mode:Calc. from Peak Group 1 - Event 1 Q3 Scan

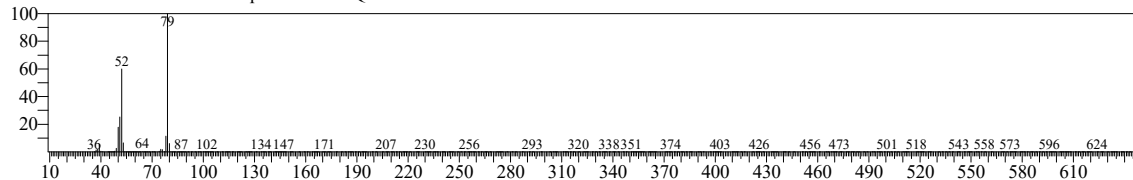

Hit#:1 Entry:498 Library:NIST20M1.lib

SI:98 Formula:C5H5N CAS:110-86-1 MolWeight:79 RetIndex:674

CompName:Pyridine \$\$ Azabenzene \$\$ Azine \$\$ NCI-C55301 \$\$ Piridina \$\$ Pirydyna \$\$ Pyridin \$\$ Rcra waste number U196 \$\$ UN 1282 \$\$ Pyr \$\$ CP :

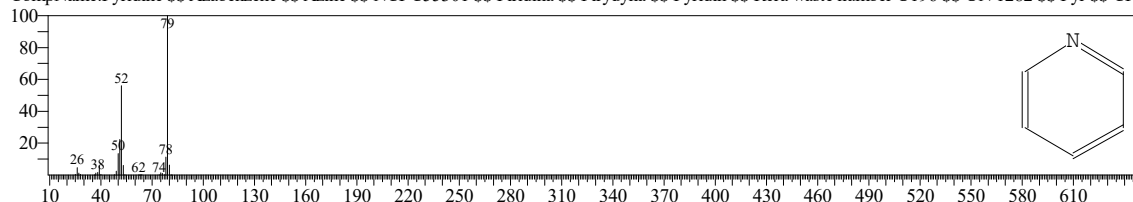

Hit#:2 Entry:6149 Library:NIST20M1.lib

SI:93 Formula:C6H5NO2 CAS:98-98-6 MolWeight:123 RetIndex:1144

CompName:2-Pyridinecarboxylic acid \$\$ Picolinic acid \$\$ .alpha.-Pyridinecarboxylic acid \$\$ o-Pyridinecarboxylic acid \$\$ 2-Carboxypyridine \$\$ 2-Picolinic

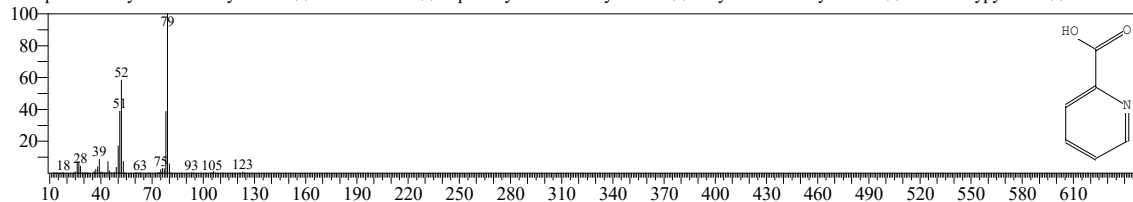

Hit#:3 Entry:2869 Library:NIST20M1.lib

SI:91 Formula:C6H5NO CAS:1121-60-4 MolWeight:107 RetIndex:976

CompName:2-Pyridinecarboxaldehyde \$\$ Picolinaldehyde \$\$ 2-Pyridinealdehyde \$\$ Pyridine-2-carboxaldehyde \$\$ Pyridine-2-aldehyde \$\$ 2-Pyridylaldehy

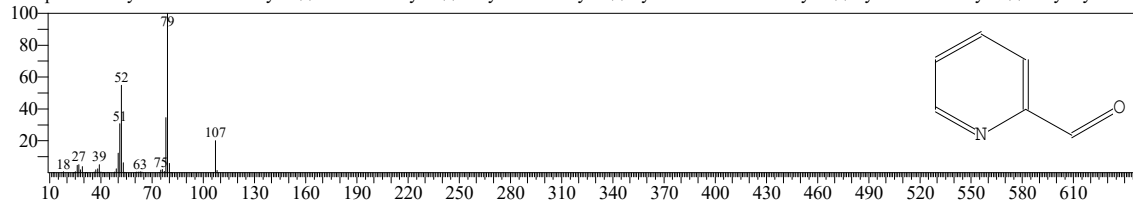

Hit#:4 Entry:1275 Library:NIST20M1.lib

SI:86 Formula:C5H8BN CAS:110-51-0 MolWeight:93 RetIndex:0

CompName:boron, trihydro(pyridine)-, (T-4)- \$\$ Pyridine, compd. with borane (1:1) \$\$ Pyridine borane \$\$ Borane-pyridine complex \$\$ Boron, trihydro(py

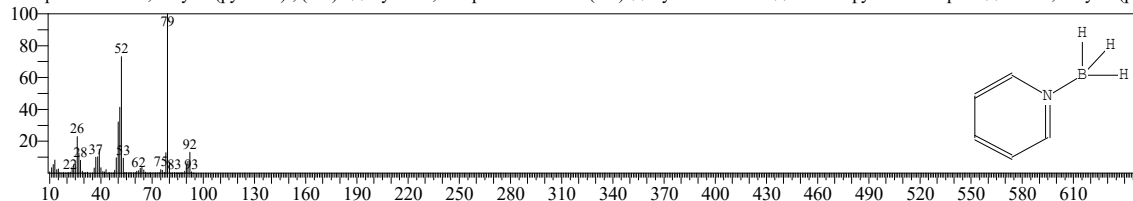

Hit#:5 Entry:5194 Library:NIST20R.lib

SI:86 Formula:C6H6N2O CAS:1452-77-3 MolWeight:122 RetIndex:1197

CompName:Picolinamide \$\$ Pyridine-2-carboxamide \$\$ .alpha.-Picolinamide \$\$ 2-Pyridinecarboxamide \$\$ .alpha.-Picolinic acid amide \$\$ Picolinic acid an

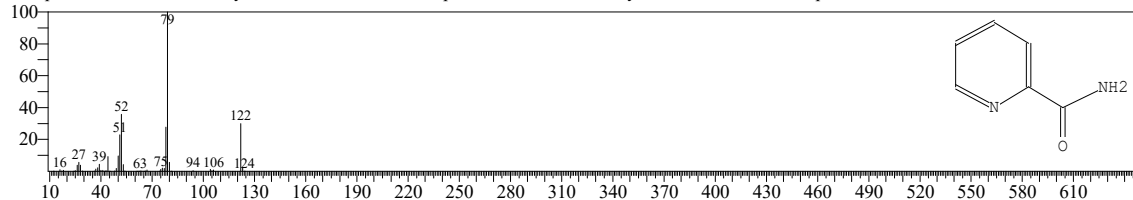

# TNAU

<< Target >>

Line# 2 R.Time: 8.925 (Scan#: 786) MassPeaks: 383

RawMode: Averaged 8.920-8.930 (785-787) BasePeak: 43.00 (3049)

BG Mode: Calc. from Peak Group 1 - Event 1 Q3 Scan

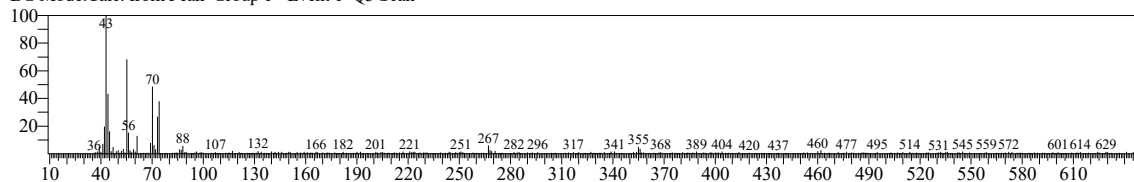

Hit#: 1 Entry: 6784 Library: NIST20R.lib

SI: 81 Formula: C7H14O2 CAS: 123-92-2 MolWeight: 130 RetIndex: 820

CompName: 1-Butanol, 3-methyl-, acetate \$\$ Isopentyl alcohol, acetate \$\$ Acetic acid, 3-methylbutyl ester \$\$ Banana oil \$\$ Isoamyl acetate \$\$ Isoamyl etha

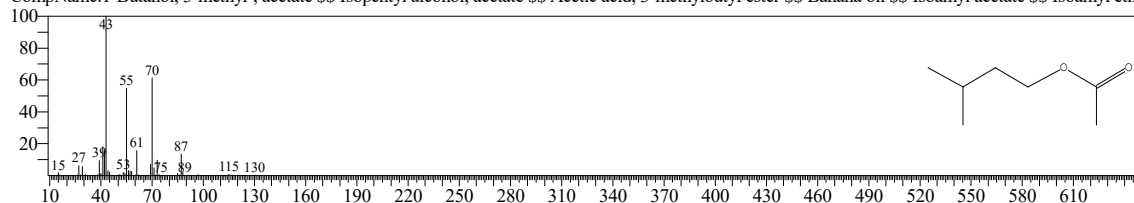

Hit#: 2 Entry: 8685 Library: NIST20M1.lib

SI: 79 Formula: C7H14O2 CAS: 628-63-7 MolWeight: 130 RetIndex: 884

CompName: Acetic acid, pentyl ester \$\$ n-Amyl acetate \$\$ n-Pentyl acetate \$\$ Amyl acetate \$\$ Birnenöl \$\$ Pentyl acetate \$\$ Acetic acid, amyl ester \$\$ Am

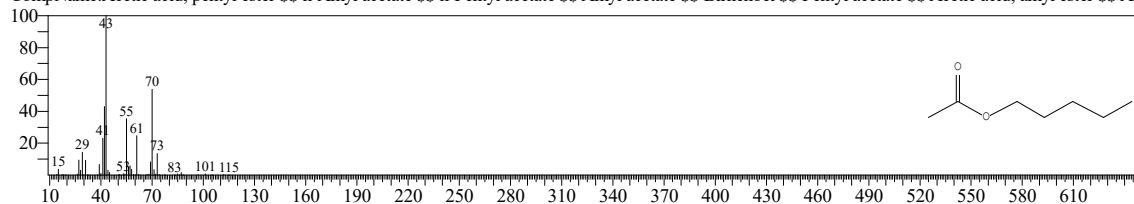

Hit#: 3 Entry: 5225 Library: NIST20M1.lib

SI: 78 Formula: C4H6O4 CAS: 17675-99-9 MolWeight: 118 RetIndex: 1201

CompName: 2-Furanone, 3,4-dihydroxytetrahydro \$\$ 3,4-Dihydroxydihydro-2(3H)-furanone #

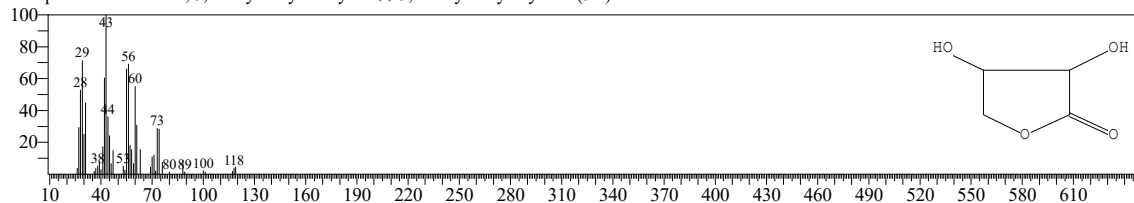

Hit#: 4 Entry: 6819 Library: NIST20R.lib

SI: 77 Formula: C7H14O2 CAS: 624-41-9 MolWeight: 130 RetIndex: 820

CompName: 1-Butanol, 2-methyl-, acetate \$\$ 2-Methyl-1-butyl acetate \$\$ 2-Methylbutyl acetate \$\$ Acetic acid 2-methylbutyl ester \$\$ 2-Methylbutyl acetate :

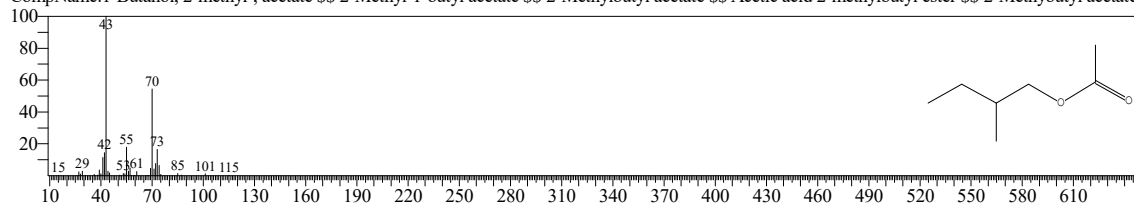

Hit#: 5 Entry: 4411 Library: NIST20R.lib

SI: 77 Formula: C6H12O2 CAS: 110-45-2 MolWeight: 116 RetIndex: 818

CompName: 1-Butanol, 3-methyl-, formate \$\$ Isopentyl alcohol, formate \$\$ Isoamyl formate \$\$ Isoamyl methanoate \$\$ Isopentyl formate \$\$ 3-Methylbutyl

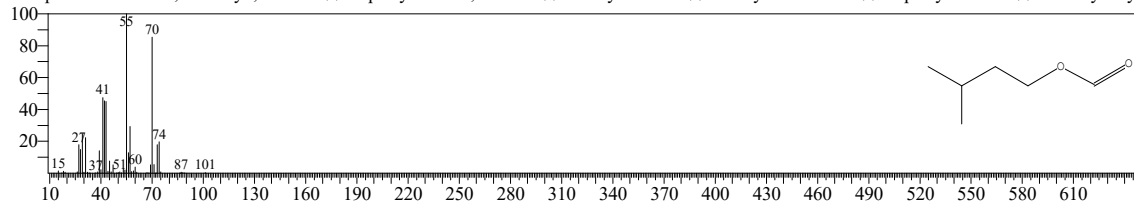

# TNAU

<< Target >>

Line#3 R.Time:9.765(Scan#:954) MassPeaks:337

RawMode:Averaged 9.760-9.770(953-955) BasePeak:281.05(3905)

BG Mode:Calc. from Peak Group 1 - Event 1 Q3 Scan

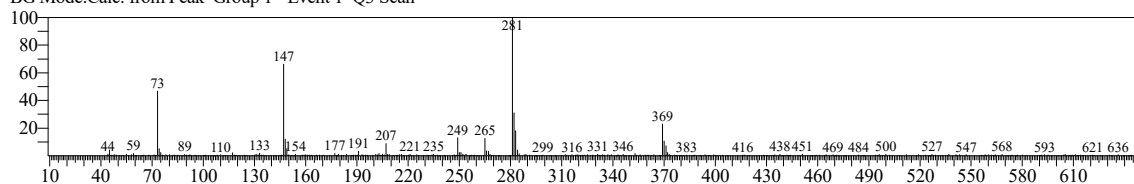

Hit#:1 Entry:40975 Library:NIST20R.lib

SI:94 Formula:C<sub>12</sub>H<sub>36</sub>O<sub>4</sub>Si<sub>5</sub> CAS:141-63-9 MolWeight:384 RetIndex:1068

CompName:Pentasiloxane, dodecamethyl- \$\$ Dodecamethylpentasiloxane \$\$ 1,1,1,3,3,5,5,7,7,9,9-Dodecamethylpentasiloxane #

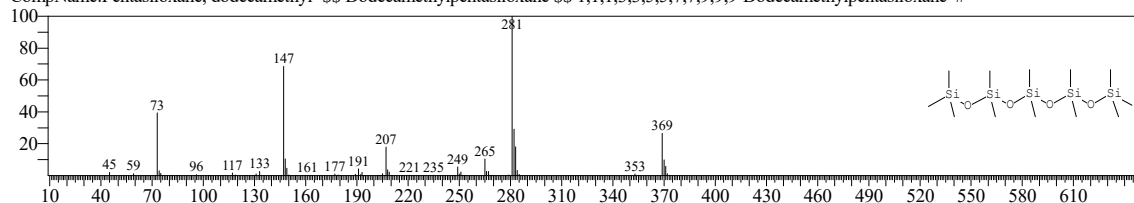

Hit#:2 Entry:249272 Library:NIST20M1.lib

SI:83 Formula:C<sub>12</sub>H<sub>36</sub>O<sub>4</sub>Si<sub>5</sub> CAS:3555-47-3 MolWeight:384 RetIndex:1068

CompName:Trisiloxane, 1,1,1,5,5,5-hexamethyl-3,3-bis[(trimethylsilyl)oxy]- \$\$ Tetrakis(trimethylsiloxy)silane \$\$ Trisiloxane, 1,1,1,5,5,5-hexamethyl-3,3-b

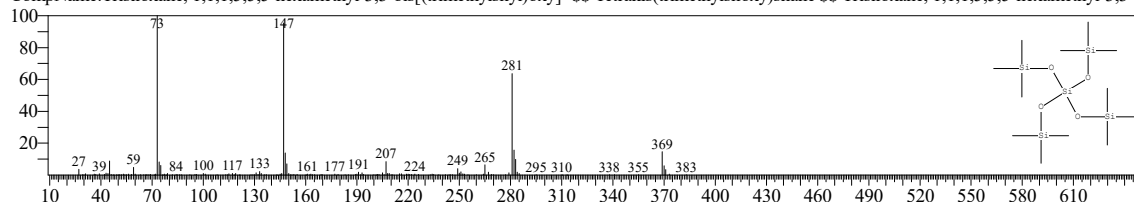

Hit#:3 Entry:27848 Library:NIST20M2.lib

SI:81 Formula:C<sub>18</sub>H<sub>48</sub>O<sub>4</sub>Si<sub>5</sub> CAS:0-00-0 MolWeight:468 RetIndex:1495

CompName:1,3,5,7,9-Pentasiloxane, 1,1,3,3,5,5,7,7,9,9-decamethyl-1,9-di(tert.butyl)-

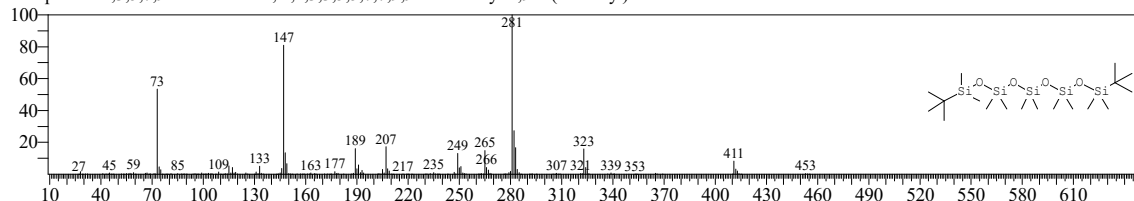

Hit#:4 Entry:249271 Library:NIST20M1.lib

SI:78 Formula:C<sub>12</sub>H<sub>36</sub>O<sub>4</sub>Si<sub>5</sub> CAS:38146-99-5 MolWeight:384 RetIndex:1068

CompName:1,1,1,3,3,5,5,7,7-Nonamethyl-3-(trimethylsiloxy)tetrasiloxane \$\$ 1,1,1,3,3,5,5,7,7-Nonamethyl-5-[(trimethylsilyl)oxy]tetrasiloxane #

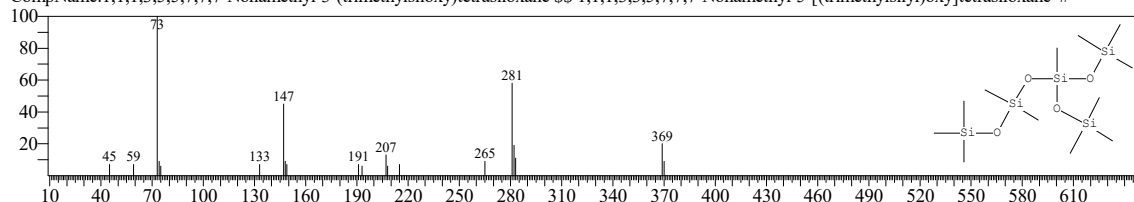

Hit#:5 Entry:158097 Library:NIST20M1.lib

SI:75 Formula:C<sub>14</sub>H<sub>24</sub>O<sub>3</sub>Si<sub>2</sub> CAS:0-00-0 MolWeight:296 RetIndex:1625

CompName:2,6-Dihydroxyacetophenone, 2TMS derivative \$\$ 2',6'-Dihydroxyacetophenone, bis(trimethylsilyl) ether

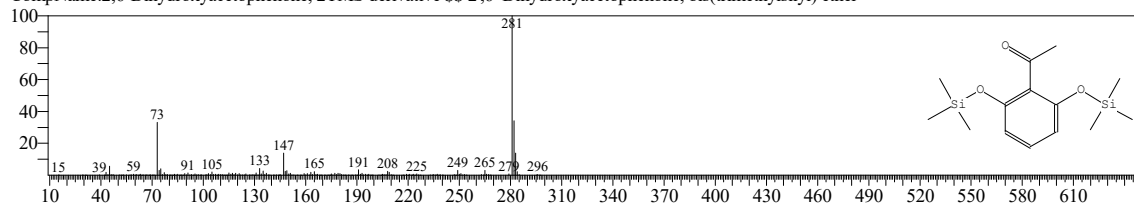

# TNAU

<< Target >>

Line#:4 R.Time:12.490(Scan#:1499) MassPeaks:347

RawMode:Averaged 12.485-12.495(1498-1500) BasePeak:138.05(39195)

BG Mode:Calc. from Peak Group 1 - Event 1 Q3 Scan

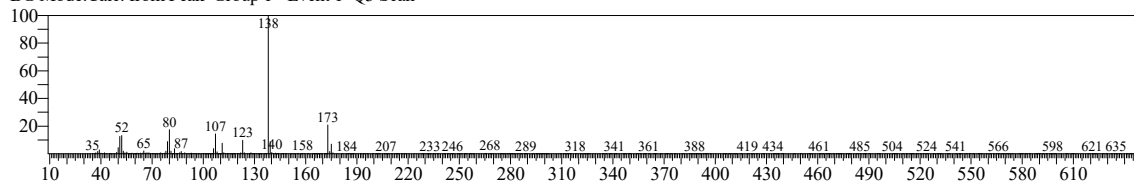

Hit#:1 Entry:8360 Library:NIST20R.lib

SI:73 Formula:C6H6N2O2 CAS:105-11-3 MolWeight:138 RetIndex:1349

CompName:2,5-Cyclohexadiene-1,4-dione, dioxime \$\$ p-Benzoquinone, dioxime \$\$ p-Quinone dioxime \$\$ p-Quinone oxime \$\$ Benzoquinone dioxime \$\$

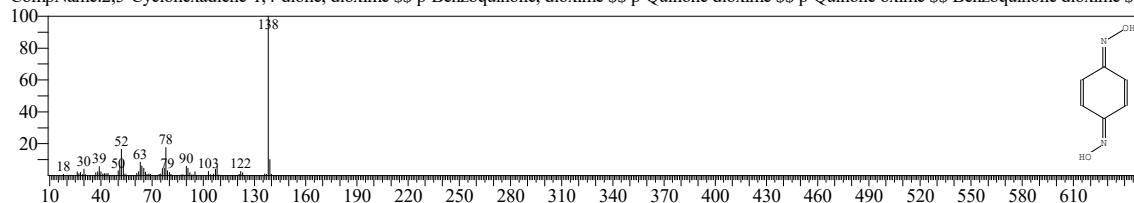

Hit#:2 Entry:11222 Library:NIST20M1.lib

SI:70 Formula:C7H10N2O CAS:3471-32-7 MolWeight:138 RetIndex:1325

CompName:Hydrazine, (4-methoxyphenyl)- \$\$ (p-Methoxyphenyl)hydrazine \$\$ 1-(4-Methoxyphenyl)hydrazine #

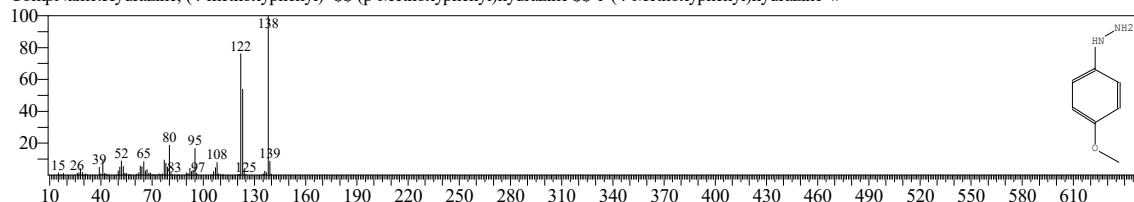

Hit#:3 Entry:25 Library:FA\_ME\_SP2560\_EI\_V3.lib

SI:33 Formula:C19H32O2 CAS:463-40-1 MolWeight:292 RetIndex:2892

CompName:Methyl linolenate ; (9Z,12Z,15Z)-octadeca-9,12,15-trienoic acid

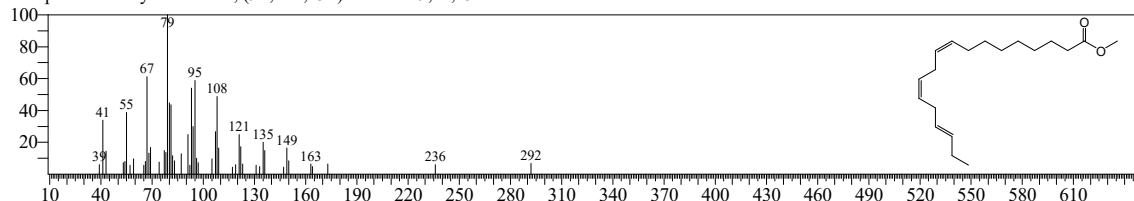

Hit#:4 Entry:137 Library:OA\_TMS\_DB5\_67min\_V3.lib

SI:32 Formula:C9H14N2OSi CAS:98-92-0 MolWeight:194 RetIndex:1486

CompName:Niacinamide-TMS ; pyridine-3-carboxamide

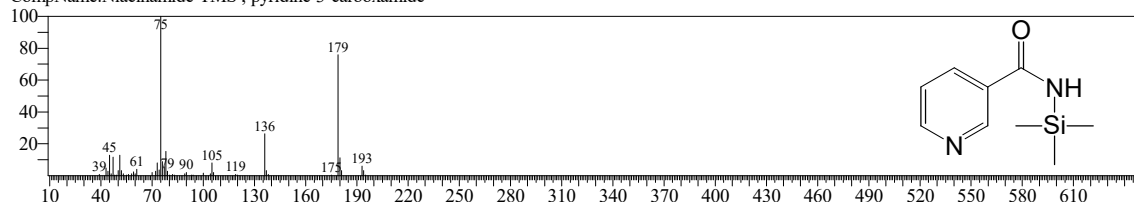

Hit#:5 Entry:21 Library:FA\_ME\_SP2560\_EI\_V3.lib

SI:32 Formula:C19H34O2 CAS:60-33-3 MolWeight:294 RetIndex:2775

CompName:Methyl linoleate ; Octadeca-9,12-dienoic acid

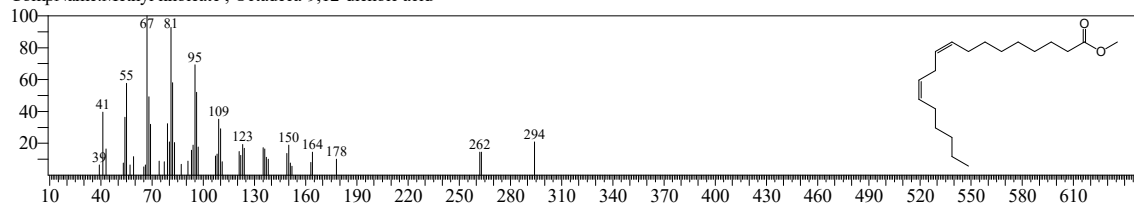

# TNAU

<< Target >>

Line#5 R.Time:12.820(Scan#:1565) MassPeaks:339

RawMode:Averaged 12.815-12.825(1564-1566) BasePeak:138.05(56897)

BG Mode:Calc. from Peak Group 1 - Event 1 Q3 Scan

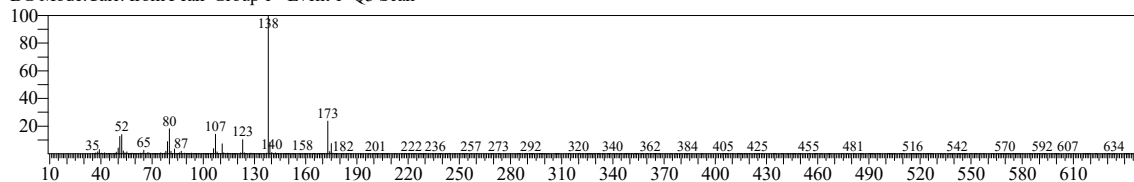

Hit#1 Entry:11187 Library:NIST20M1.lib

SI:74 Formula:C7H6O3 CAS:533-31-3 MolWeight:138 RetIndex:1245

CompName:1,3-Benzodioxol-5-ol \$ Phenol, 3,4-(methylenedioxy)- \$ Sesamol \$ 3,4-(Methylenedioxy)phenol \$ 5-Hydroxy-1,3-benzodioxole \$ Methy

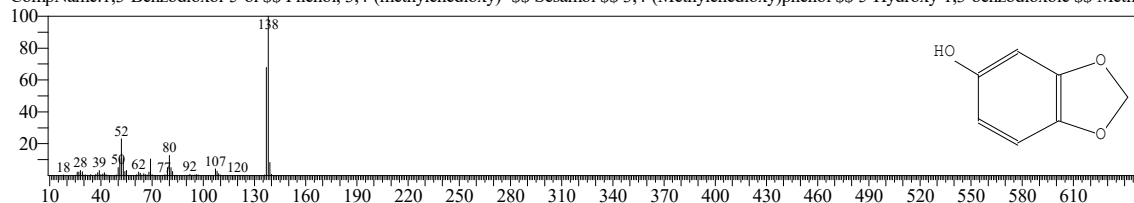

Hit#2 Entry:8360 Library:NIST20R.lib

SI:73 Formula:C6H6N2O2 CAS:105-11-3 MolWeight:138 RetIndex:1349

CompName:2,5-Cyclohexadiene-1,4-dione, dioxime \$ p-Benzoquinone, dioxime \$ p-Quinone dioxime \$ p-Quinone oxime \$ Benzoquinone dioxime \$

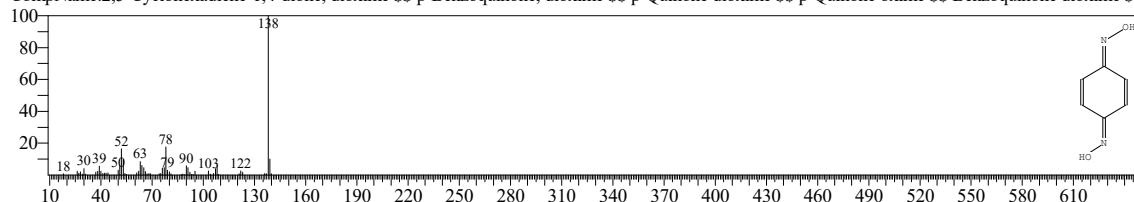

Hit#3 Entry:11188 Library:NIST20M1.lib

SI:72 Formula:C7H6O3 CAS:69393-72-2 MolWeight:138 RetIndex:1245

CompName:2,3-Methylenedioxyphenol \$ 1,3-Benzodioxol-4-ol #

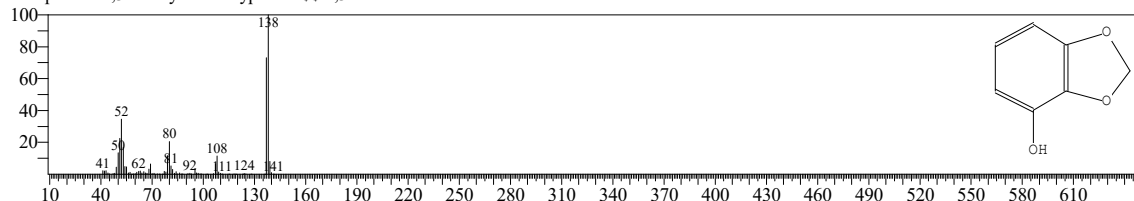

Hit#4 Entry:8422 Library:NIST20R.lib

SI:71 Formula:C7H10N2O CAS:25680-58-4 MolWeight:138 RetIndex:1070

CompName:2-Ethyl-3-methoxypyrazine \$ 2-Methoxy-3-ethylpyrazine \$ Pyrazine, 2-ethyl-3-methoxy- \$ 3-Ethyl-2-methoxypyrazine \$ Pyrazine, 3-ethyl-

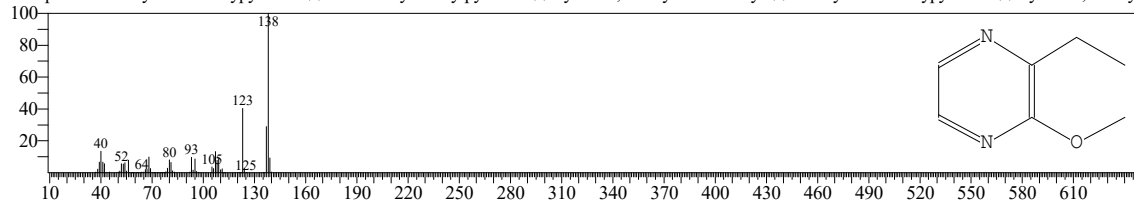

Hit#5 Entry:11222 Library:NIST20M1.lib

SI:70 Formula:C7H10N2O CAS:3471-32-7 MolWeight:138 RetIndex:1325

CompName:Hydrazine, (4-methoxyphenyl)- \$ (p-Methoxyphenyl)hydrazine \$ 1-(4-Methoxyphenyl)hydrazine #

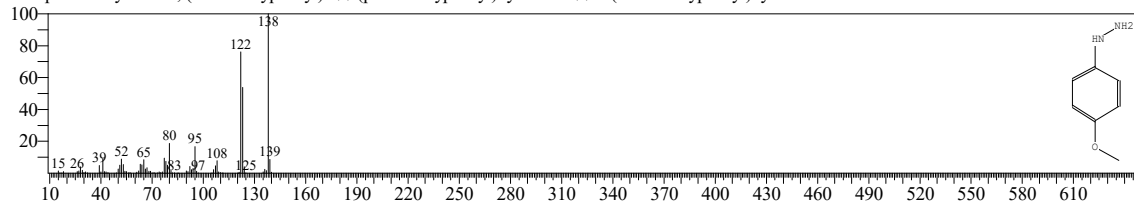

# TNAU

<< Target >>

Line#6 R.Time:13.385(Scan#:1678) MassPeaks:389

RawMode:Averaged 13.380-13.390(1677-1679) BasePeak:155.05(31673)

BG Mode:Calc. from Peak Group 1 - Event 1 Q3 Scan

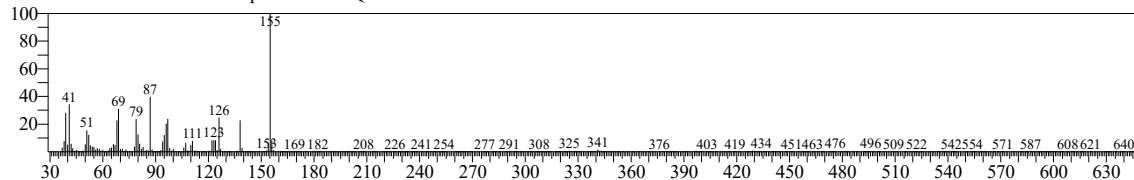

Hit#:1 Entry:34 Library:FA\_ME\_SP2560\_EI\_V3.lib

SI:53 Formula:C23H42O2 CAS:7370-49-2 MolWeight:350 RetIndex:3169

CompName:Methyl cis-13,16-Docosadienate ; (13Z,16E)-docosa-13,16-dienoic acid

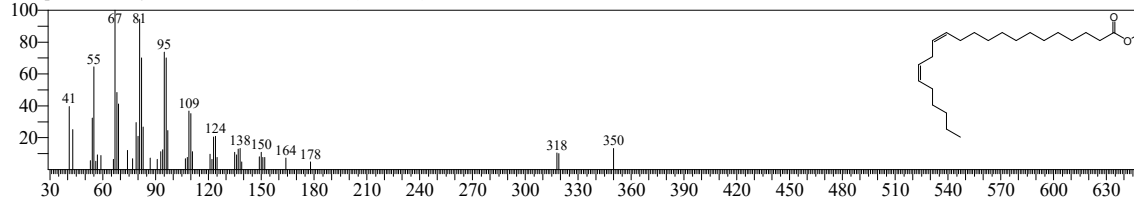

Hit#:2 Entry:21 Library:FA\_ME\_SP2560\_EI\_V3.lib

SI:52 Formula:C19H34O2 CAS:60-33-3 MolWeight:294 RetIndex:2775

CompName:Methyl linoleate ; Octadeca-9,12-dienoic acid

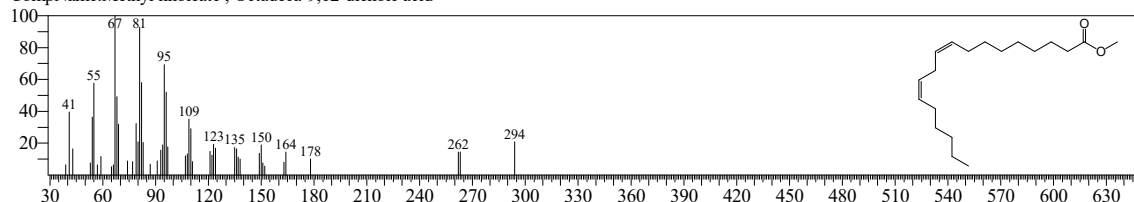

Hit#:3 Entry:20 Library:FA\_ME\_SP2560\_EI\_V3.lib

SI:51 Formula:C19H34O2 CAS:506-21-8 MolWeight:294 RetIndex:2727

CompName:Methyl linolelaidate ; (9E,12E)-octadeca-9,12-dienoic acid

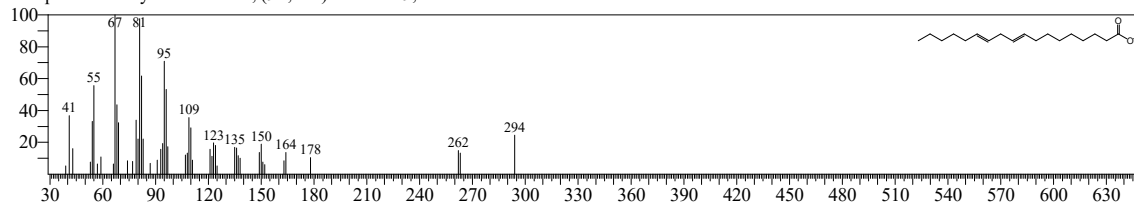

Hit#:4 Entry:11 Library:FA\_ME\_SP2560\_EI\_V3.lib

SI:51 Formula:C16H30O2 CAS:84743-29-3 MolWeight:254 RetIndex:2388

CompName:Methyl cis-10-pentadecenoate ; (Z)-pentadec-10-enoic acid

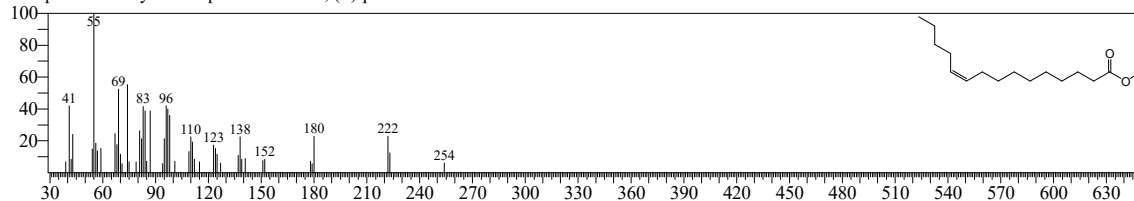

Hit#:5 Entry:27 Library:FA\_ME\_SP2560\_EI\_V3.lib

SI:51 Formula:C21H38O2 CAS:2091-39-6 MolWeight:322 RetIndex:2973

CompName:Methyl cis-11,14-Icosadienoate ; ; Icosa-11,14-dienoic acid

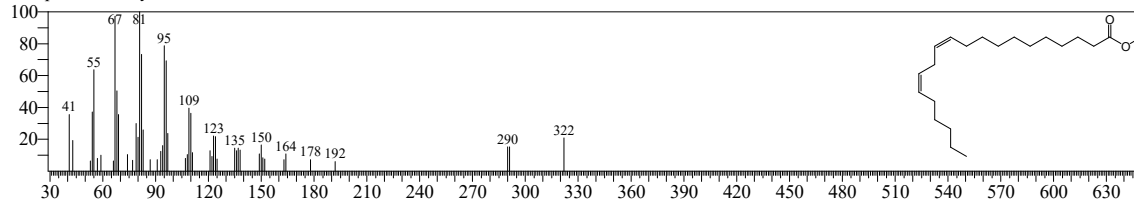

# TNAU

<< Target >>

Line#:7 R.Time:13.570(Scan#:1715) MassPeaks:367

RawMode:Averaged 13.565-13.575(1714-1716) BasePeak:155.05(25684)

BG Mode:Calc. from Peak Group 1 - Event 1 Q3 Scan

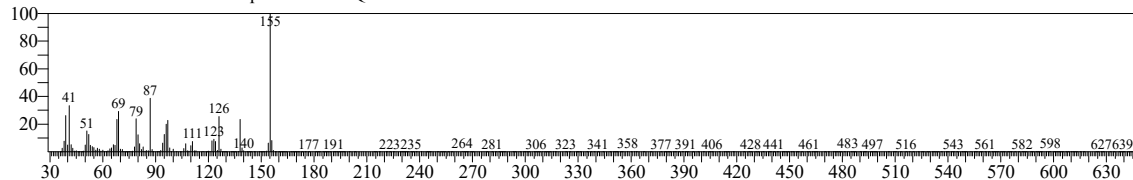

Hit#:1 Entry:34 Library:FA\_ME\_SP2560\_EI\_V3.lib

SI:53 Formula:C23H42O2 CAS:7370-49-2 MolWeight:350 RetIndex:3169

CompName:Methyl cis-13,16-Docosadienate ; (13Z,16E)-docosa-13,16-dienoic acid

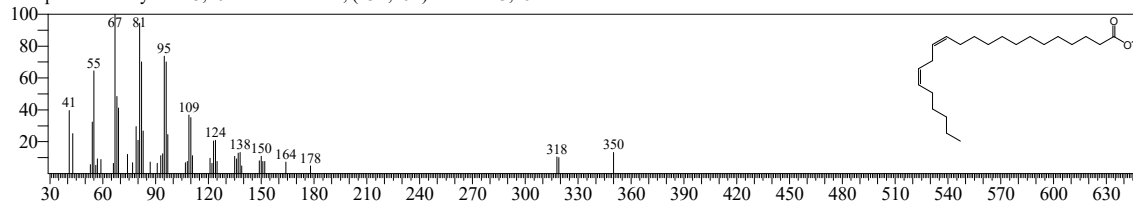

Hit#:2 Entry:21 Library:FA\_ME\_SP2560\_EI\_V3.lib

SI:52 Formula:C19H34O2 CAS:60-33-3 MolWeight:294 RetIndex:2775

CompName:Methyl linoleate ; Octadeca-9,12-dienoic acid

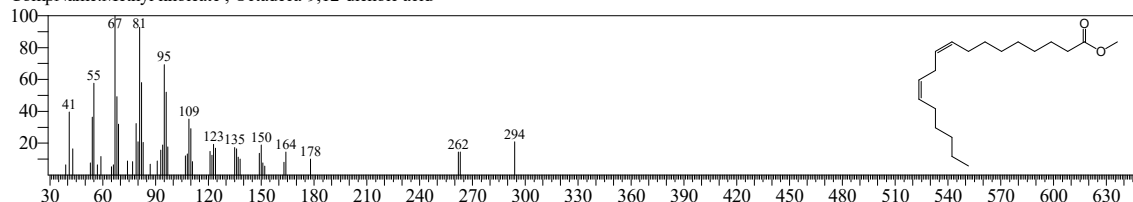

Hit#:3 Entry:20 Library:FA\_ME\_SP2560\_EI\_V3.lib

SI:51 Formula:C19H34O2 CAS:506-21-8 MolWeight:294 RetIndex:2727

CompName:Methyl linolelaidate ; (9E,12E)-octadeca-9,12-dienoic acid

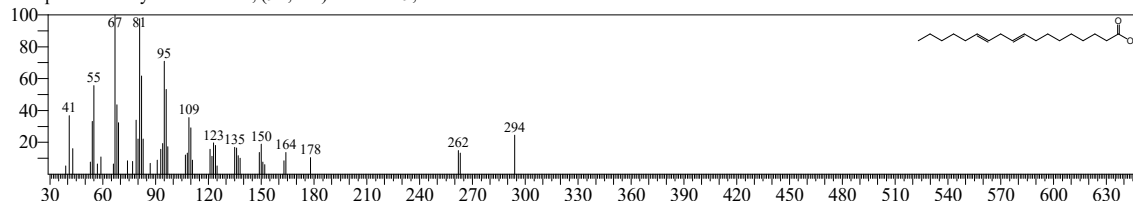

Hit#:4 Entry:27 Library:FA\_ME\_SP2560\_EI\_V3.lib

SI:51 Formula:C21H38O2 CAS:2091-39-6 MolWeight:322 RetIndex:2973

CompName:Methyl cis-11,14-Icosadienoate ; Icosa-11,14-dienoic acid

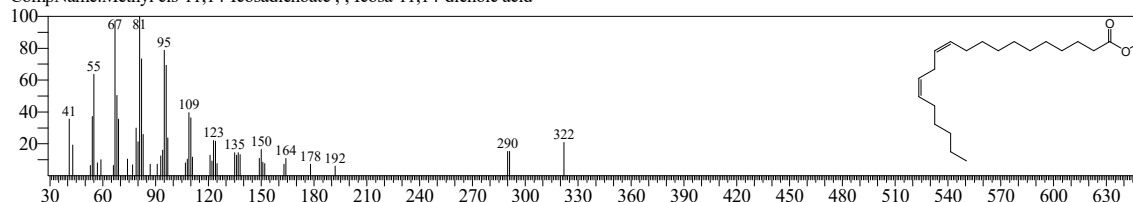

Hit#:5 Entry:11 Library:FA\_ME\_SP2560\_EI\_V3.lib

SI:51 Formula:C16H30O2 CAS:84743-29-3 MolWeight:254 RetIndex:2388

CompName:Methyl cis-10-pentadecenoate ; (Z)-pentadec-10-enoic acid

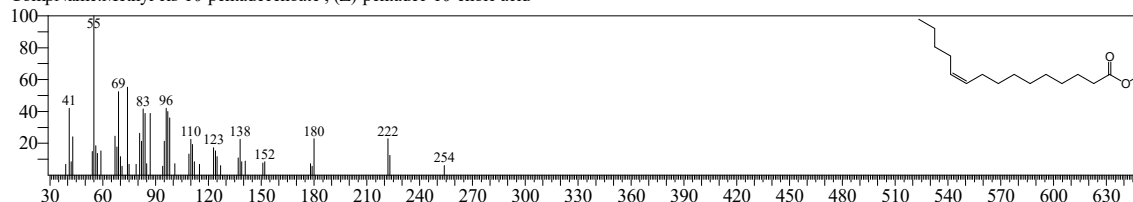



# TNAU

<< Target >>

Line#:8 R.Time:13.670(Scan#:1735) MassPeaks:333

RawMode:Averaged 13.665-13.675(1734-1736) BasePeak:87.10(109)

BG Mode:Calc. from Peak Group 1 - Event 1 Q3 Scan

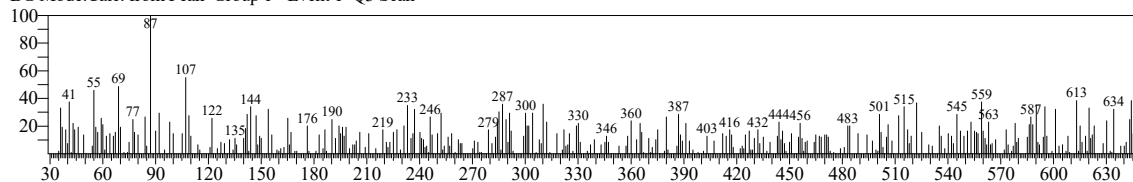

Hit#:1 Entry:13 Library:FA\_ME\_SP2560\_EI\_V3.lib

SI:21 Formula:C17H32O2 CAS:373-49-9 MolWeight:268 RetIndex:2478

CompName:Methyl palmitoleate ; Hexadec-9-enoic acid

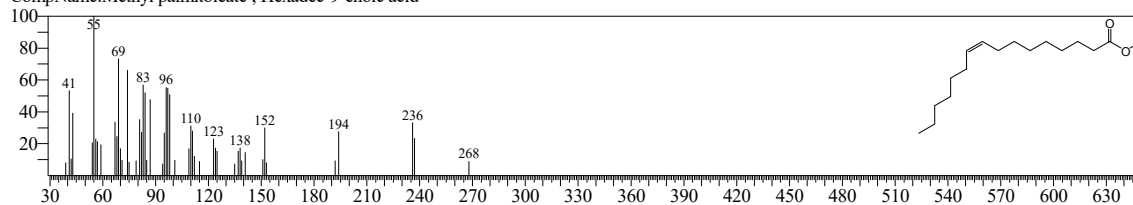

Hit#:2 Entry:9 Library:FA\_ME\_SP2560\_EI\_V3.lib

SI:21 Formula:C15H28O2 CAS:544-64-9 MolWeight:240 RetIndex:2283

CompName:Methyl myristoleate ; ; (Z)-tetradec-9-enoic acid

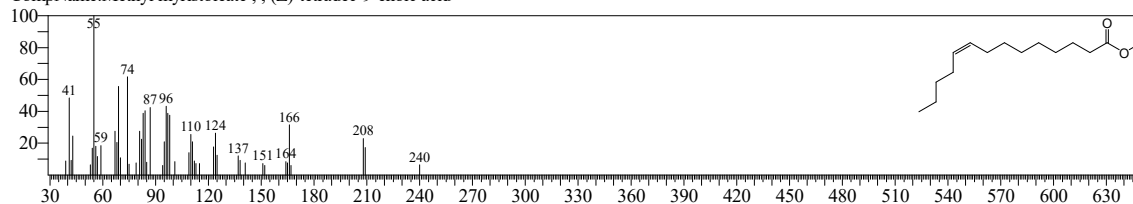

Hit#:3 Entry:11 Library:FA\_ME\_SP2560\_EI\_V3.lib

SI:20 Formula:C16H30O2 CAS:84743-29-3 MolWeight:254 RetIndex:2388

CompName:Methyl cis-10-pentadecenoate ; (Z)-pentadec-10-enoic acid

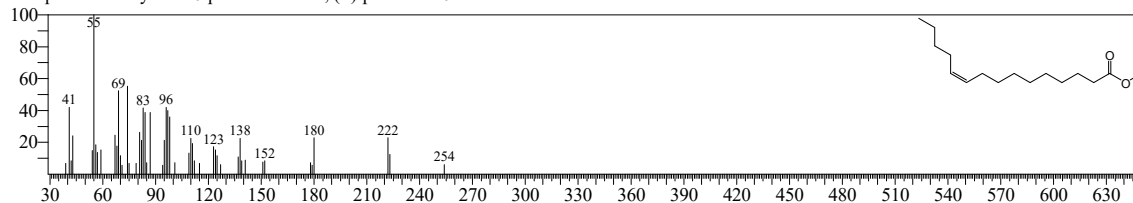

Hit#:4 Entry:24 Library:FA\_ME\_SP2560\_EI\_V3.lib

SI:20 Formula:C21H40O2 CAS:5561-99-9 MolWeight:324 RetIndex:2874

CompName:Methyl cis-11-icosenoate ; ; Icos-11-enoic acid

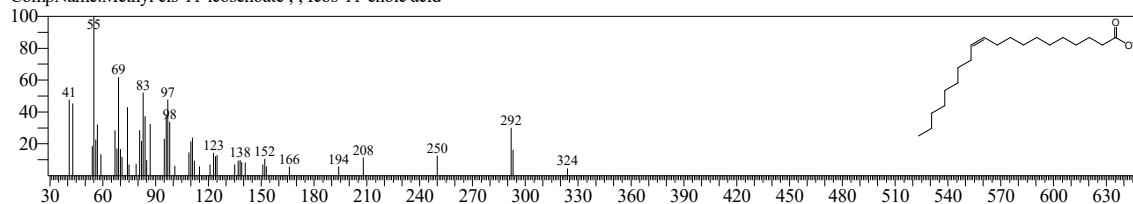

Hit#:5 Entry:15 Library:FA\_ME\_SP2560\_EI\_V3.lib

SI:19 Formula:C18H34O2 CAS:29743-97-3 MolWeight:282 RetIndex:2581

CompName:Methyl cis-10-heptadecenoate ; Heptadec-10-enoic acid

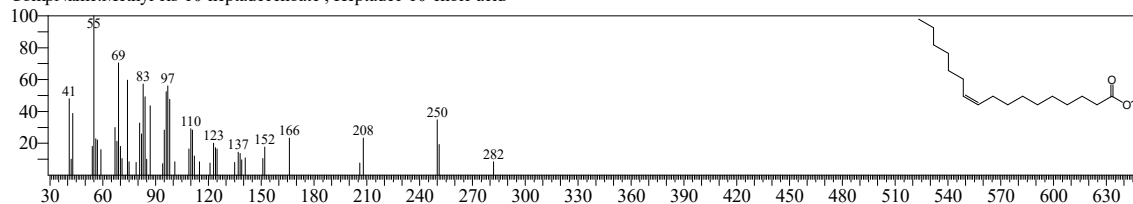

# TNAU

<< Target >>

Line#9 R.Time:18.115(Scan#:2624) MassPeaks:283

RawMode:Averaged 18.110-18.120(2623-2625) BasePeak:60.05(4083)

BG Mode:Calc. from Peak Group 1 - Event 1 Q3 Scan

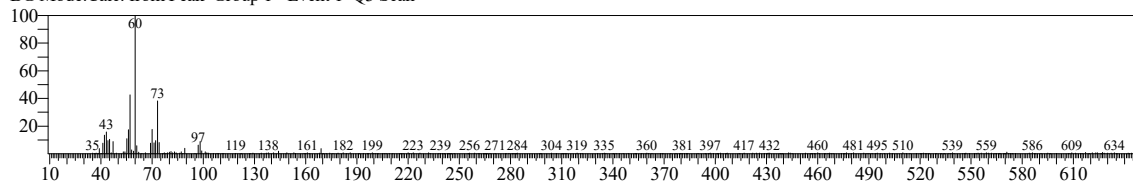

Hit#:1 Entry:36240 Library:NIST20M1.lib

SI:92 Formula:C<sub>6</sub>H<sub>12</sub>O<sub>6</sub> CAS:2595-97-3 MolWeight:180 RetIndex:1698

CompName:D-Allose \$\$ .beta.-D-Allose \$\$ Hexose #

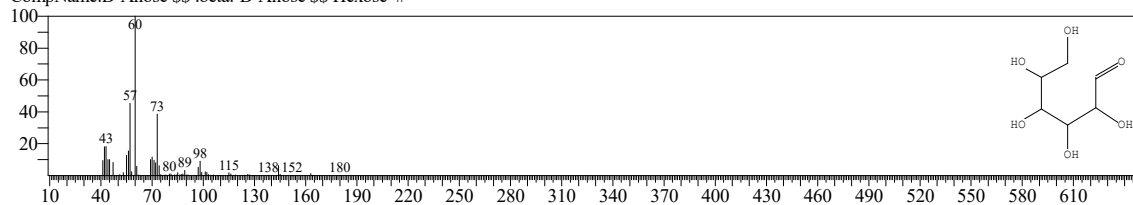

Hit#:2 Entry:23811 Library:NIST20M1.lib

SI:92 Formula:C<sub>6</sub>H<sub>10</sub>O<sub>5</sub> CAS:498-07-7 MolWeight:162 RetIndex:1404

CompName:.beta.-D-Glucopyranose, 1,6-anhydro- \$\$ Anhydro-d-mannosan \$\$ Levoglucosan \$\$ 1,6-Anhydro-.beta.-D-glucopyranose \$\$ 1,6-Anhydro-beta-

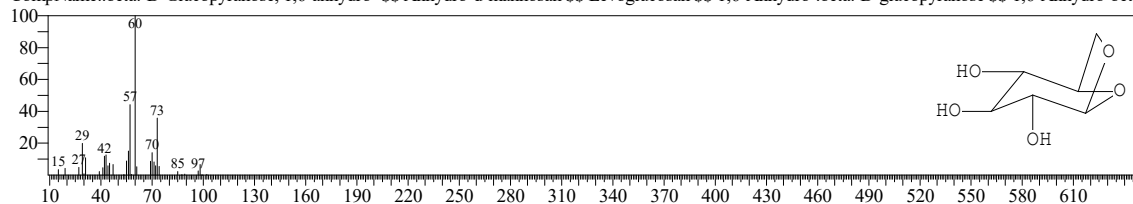

Hit#:3 Entry:23812 Library:NIST20M1.lib

SI:90 Formula:C<sub>6</sub>H<sub>10</sub>O<sub>5</sub> CAS:0-00-0 MolWeight:162 RetIndex:1404

CompName:1,6-Anhydro-.beta.-d-talopyranose

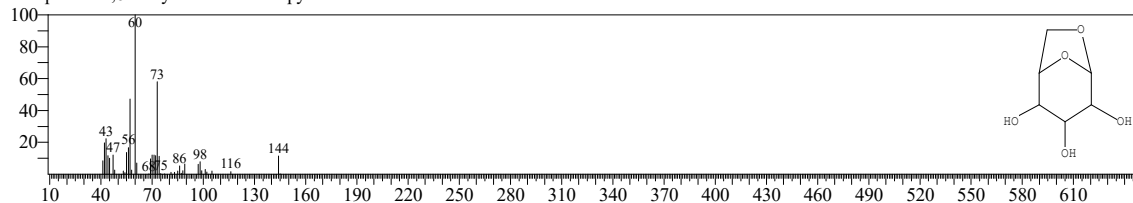

Hit#:4 Entry:23808 Library:NIST20M1.lib

SI:87 Formula:C<sub>6</sub>H<sub>10</sub>O<sub>5</sub> CAS:0-00-0 MolWeight:162 RetIndex:1400

CompName:3,4-Altrosan \$\$ 3,4-Anhydrohexopyranose #

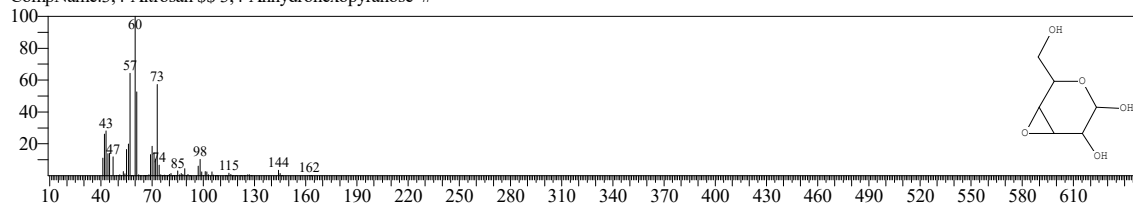

Hit#:5 Entry:47352 Library:NIST20M1.lib

SI:83 Formula:C<sub>7</sub>H<sub>14</sub>O<sub>6</sub> CAS:709-50-2 MolWeight:194 RetIndex:1714

CompName:.beta.-D-Glucopyranoside, methyl \$\$ Glucopyranoside, methyl, .beta.-D- \$\$ Methyl .beta.-D-glucopyranoside \$\$ Methyl .beta.-D-glucoside \$\$ 1

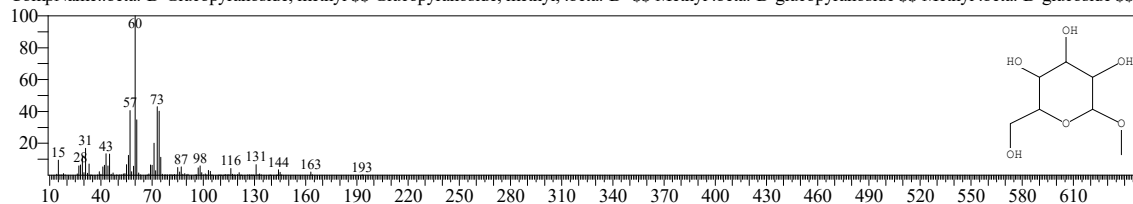

# TNAU

<< Target >>

Line#:10 R.Time:18.495(Scan#:2700) MassPeaks:342

RawMode:Averaged 18.490-18.500(2699-2701) BasePeak:191.15(3795)

BG Mode:Calc. from Peak Group 1 - Event 1 Q3 Scan

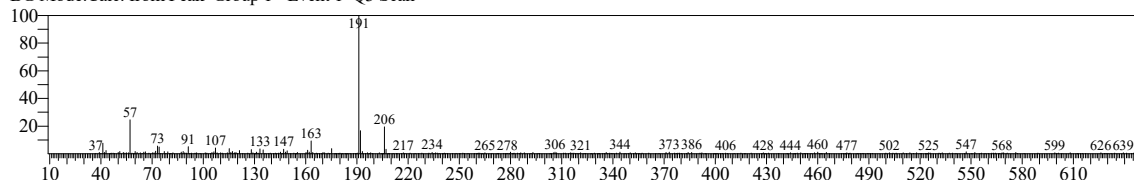

Hit#:1 Entry:24086 Library:NIST20R.lib

SI:90 Formula:C<sub>14</sub>H<sub>22</sub>O CAS:96-76-4 MolWeight:206 RetIndex:1555

CompName:2,4-Di-tert-butylphenol \$\$ Phenol, 2,4-bis(1,1-dimethylethyl)- \$\$ Phenol, 2,4-di-tert-butyl- \$\$ 2,4-di-t-Butylphenol \$\$ 1-Hydroxy-2,4-di-tert-bu

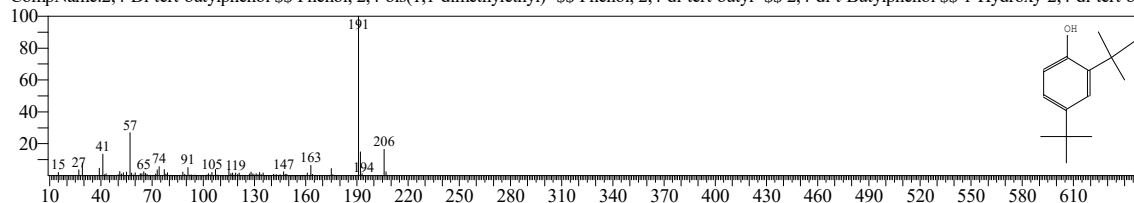

Hit#:2 Entry:24110 Library:NIST20R.lib

SI:88 Formula:C<sub>14</sub>H<sub>22</sub>O CAS:1138-52-9 MolWeight:206 RetIndex:1555

CompName:Phenol, 3,5-bis(1,1-dimethylethyl)- \$\$ Phenol, 3,5-di-tert-butyl- \$\$ 3,5-Di-tert-butylphenol \$\$ Phenol, 3,5-bis(t-butyl) \$\$ 3,5-Di-t-butylphenol \$

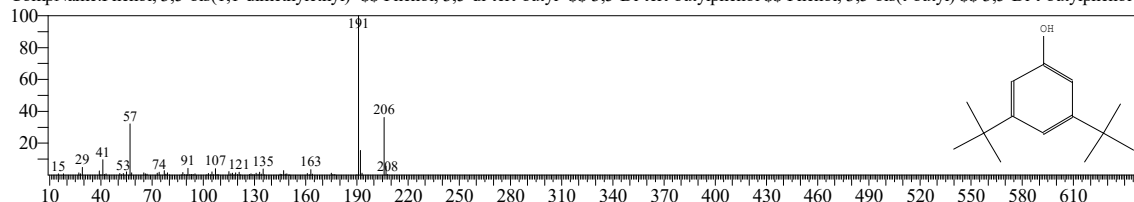

Hit#:3 Entry:24098 Library:NIST20R.lib

SI:88 Formula:C<sub>14</sub>H<sub>22</sub>O CAS:5875-45-6 MolWeight:206 RetIndex:1555

CompName:Phenol, 2,5-bis(1,1-dimethylethyl)- \$\$ Phenol, 2,5-di-tert-butyl- \$\$ 2,5-Di-tert-butylphenol \$\$ 2,5-bis(1,1-Dimethylethyl)phenol

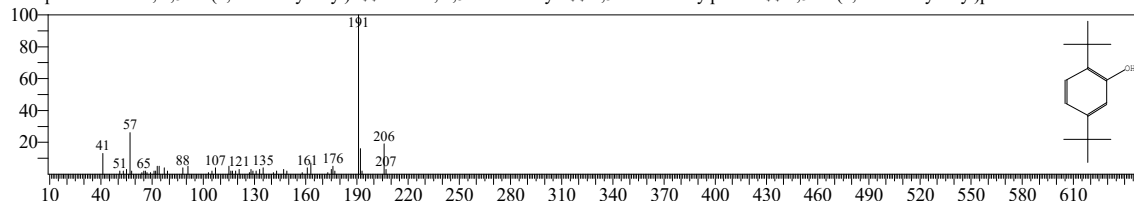

Hit#:4 Entry:59031 Library:NIST20M1.lib

SI:87 Formula:C<sub>14</sub>H<sub>22</sub>O CAS:128-39-2 MolWeight:206 RetIndex:1555

CompName:Phenol, 2,6-bis(1,1-dimethylethyl)- \$\$ Phenol, 2,6-di-tert-butyl- \$\$ 2,6-Bis(tert-butyl)phenol \$\$ 2,6-Bis(1,1-dimethylethyl)phenol \$\$ 2,6-Di-ter

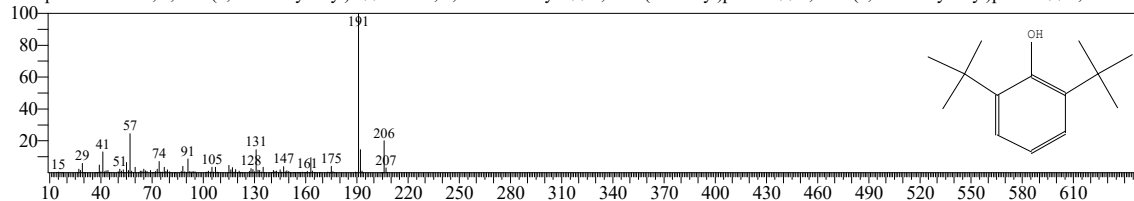

Hit#:5 Entry:170993 Library:NIST20M1.lib

SI:84 Formula:C<sub>19</sub>H<sub>30</sub>O<sub>3</sub> CAS:166273-38-7 MolWeight:306 RetIndex:2255

CompName:Pentanoic acid, 5-hydroxy-, 2,4-di-t-butylphenyl esters \$\$ 2,4-Di-tert-butylphenyl 5-hydroxypentanoate #

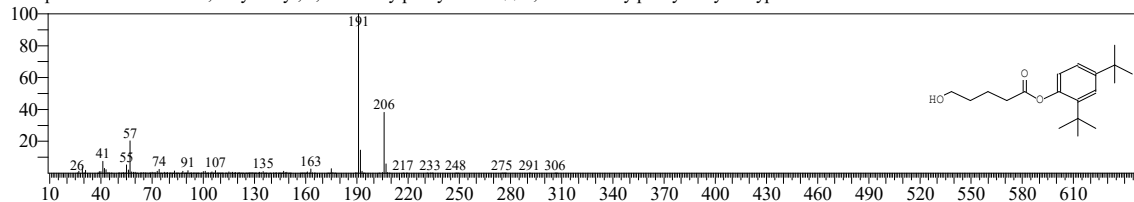

# TNAU

<< Target >>

Line#:11 R.Time:20.370(Scan#:3075) MassPeaks:329

RawMode:Averaged 20.365-20.375(3074-3076) BasePeak:73.00(1903)

BG Mode:Calc. from Peak Group 1 - Event 1 Q3 Scan

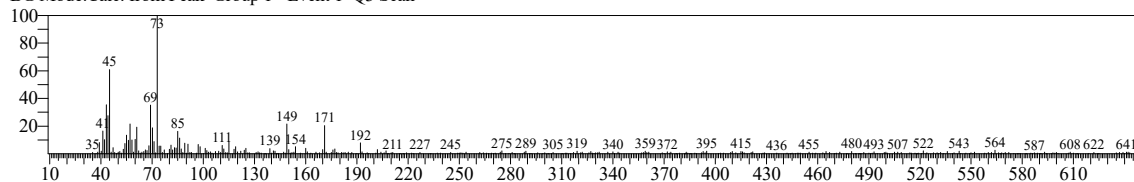

Hit#:1 Entry:23805 Library:NIST20M1.lib

SI:80 Formula:C6H10O5 CAS:0-00-0 MolWeight:162 RetIndex:1404

CompName:1,6-Anhydro- $\alpha$ -D-galactofuranose

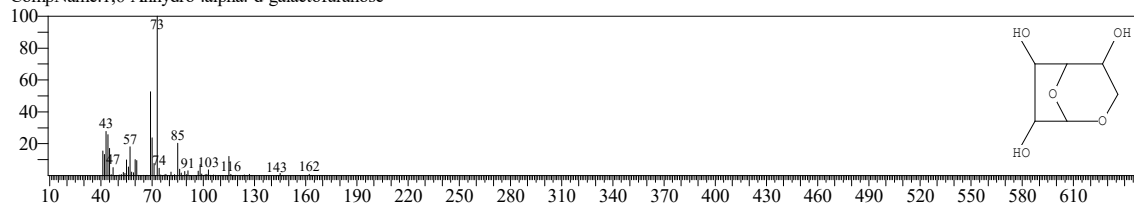

Hit#:2 Entry:23804 Library:NIST20M1.lib

SI:79 Formula:C6H10O5 CAS:7425-74-3 MolWeight:162 RetIndex:1404

CompName:1,6-Anhydro- $\beta$ -D-glucofuranose

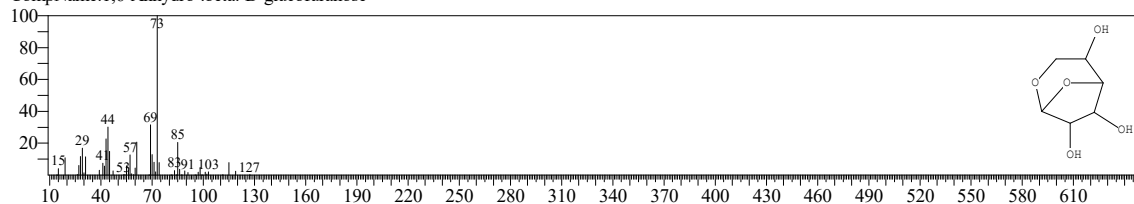

Hit#:3 Entry:36239 Library:NIST20M1.lib

SI:77 Formula:C6H12O6 CAS:3458-28-4 MolWeight:180 RetIndex:1698

CompName:d-Mannose \$\$ Mannose, d- \$\$ Carubiose \$\$ d(+)-Mannose \$\$ Mannose \$\$ Seminose \$\$ Hexose #

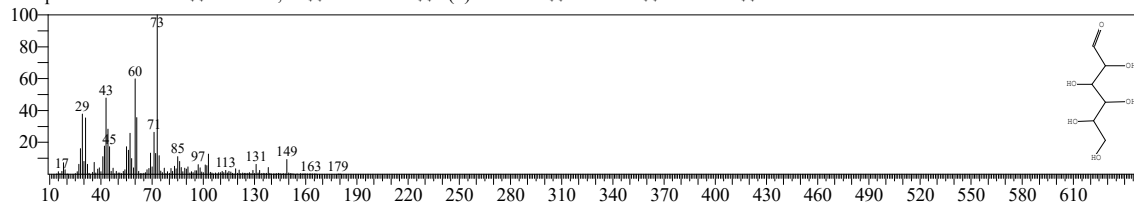

Hit#:4 Entry:58194 Library:NIST20M1.lib

SI:77 Formula:C8H14O6 CAS:13224-99-2 MolWeight:206 RetIndex:1694

CompName:4,6-O-Ethylidene- $\alpha$ -D-glucose \$\$  $\alpha$ -D-Glucopyranose, 4,6-O-ethylidene- \$\$ 4,6-O-Ethylidenehexopyranose #

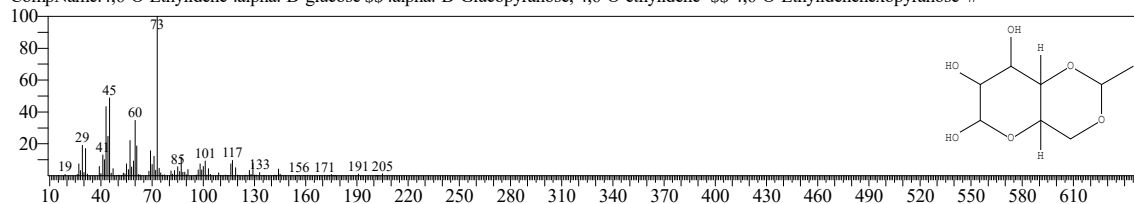

Hit#:5 Entry:227937 Library:NIST20M1.lib

SI:76 Formula:C19H34O6 CAS:55191-43-0 MolWeight:358 RetIndex:2348

CompName:Dodecanoic acid, 2-(acetyloxy)-1-[(acetyloxy)methyl]ethyl ester \$\$ 2-(Acetyloxy)-1-[(ac

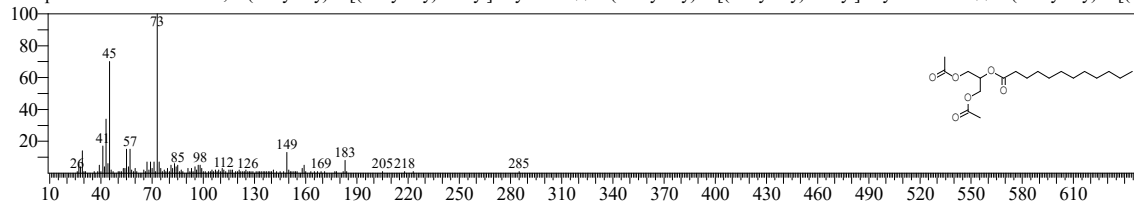

# TNAU

<< Target >>

Line#:12 R.Time:28.295(Scan#:4660) MassPeaks:387

RawMode:Averaged 28.290-28.300(4659-4661) BasePeak:73.05(6780)

BG Mode:Calc. from Peak Group 1 - Event 1 Q3 Scan

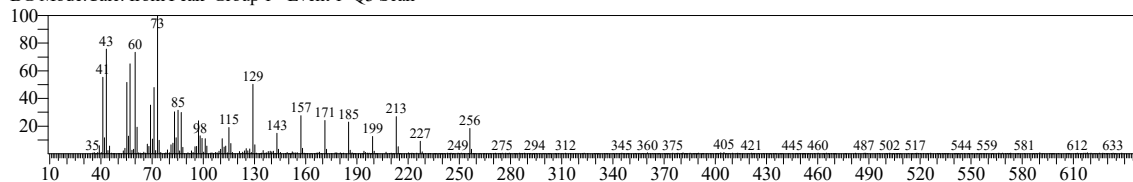

Hit#:1 Entry:31600 Library:NIST20R.lib

SI:95 Formula:C16H32O2 CAS:57-10-3 MolWeight:256 RetIndex:1968

CompName:n-Hexadecanoic acid \$ Hexadecanoic acid \$ n-Hexadecic acid \$ Palmitic acid \$ Pentadecanecarboxylic acid \$ 1-Pentadecanecarboxylic

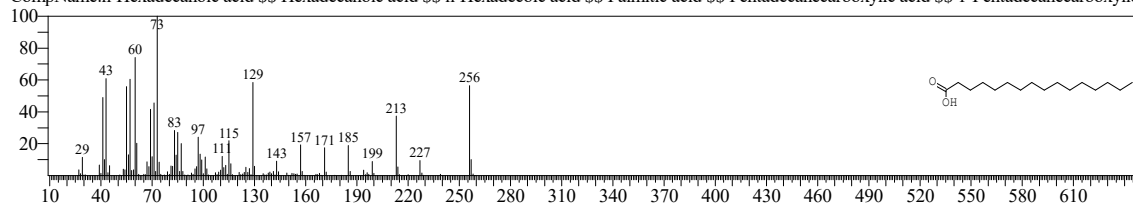

Hit#:2 Entry:29890 Library:NIST20R.lib

SI:92 Formula:C15H30O2 CAS:1002-84-2 MolWeight:242 RetIndex:1869

CompName:Pentadecanoic acid \$ Pentadecylic acid \$ n-Pentadecanoic acid \$ n-Pentadecylic acid

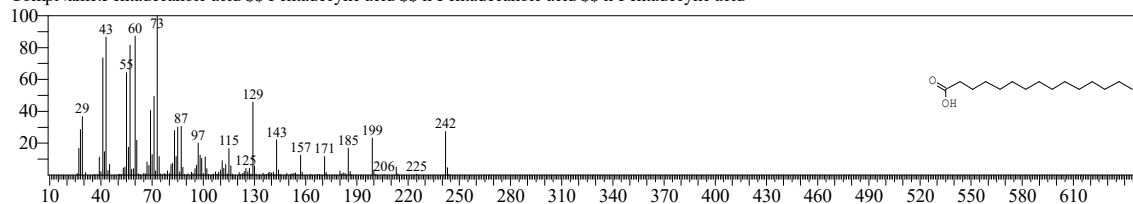

Hit#:3 Entry:44286 Library:NIST20M2.lib

SI:91 Formula:C38H68O8 CAS:28474-90-0 MolWeight:652 RetIndex:4765

CompName:l-(+)-Ascorbic acid 2,6-dihexadecanoate

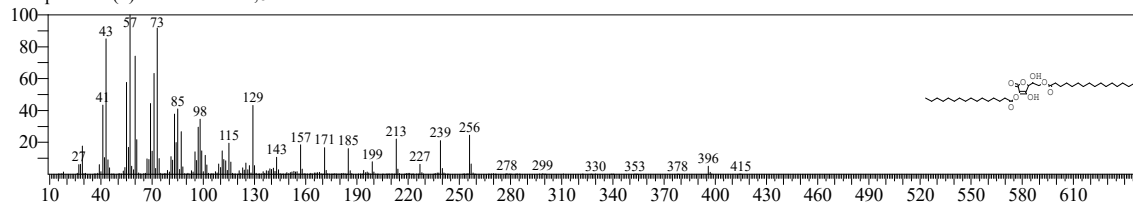

Hit#:4 Entry:25643 Library:NIST20R.lib

SI:91 Formula:C13H26O2 CAS:638-53-9 MolWeight:214 RetIndex:1670

CompName:Tridecanoic acid \$ n-Tridecanoic acid \$ n-Tridecoic acid \$ Tridecyllic acid

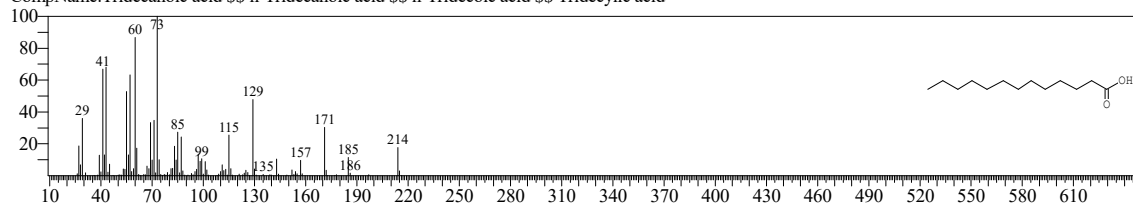

Hit#:5 Entry:81713 Library:NIST20M1.lib

SI:90 Formula:C14H28O2 CAS:544-63-8 MolWeight:228 RetIndex:1769

CompName:Tetradecanoic acid \$ Myristic acid \$ n-Tetradecanoic acid \$ n-Tetradecic acid \$ Neo-Fat 14 \$ Univol U 316S \$ 1-Tridecanecarboxylic ;

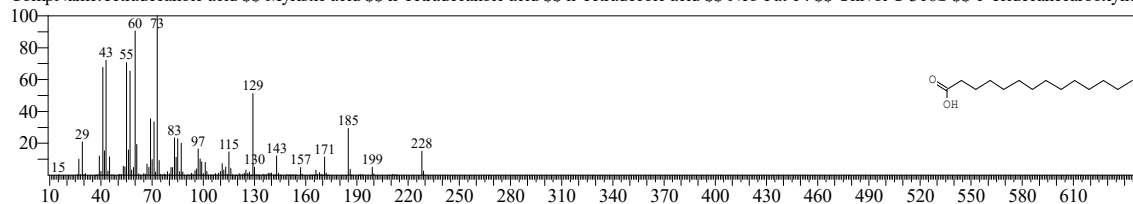

# TNAU

<< Target >>

Line#:13 R.Time:31.475(Scan#:5296) MassPeaks:416

RawMode:Averaged 31.470-31.480(5295-5297) BasePeak:67.05(3848)

BG Mode:Calc. from Peak Group 1 - Event 1 Q3 Scan

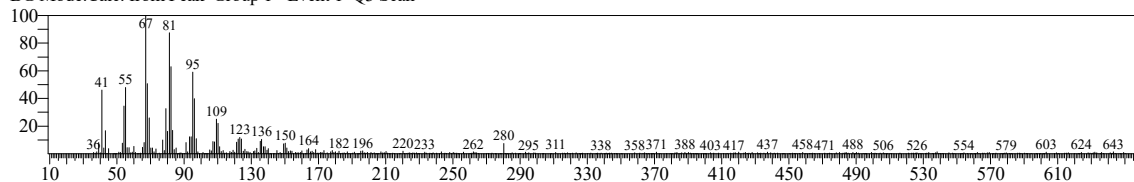

Hit#:1 Entry:34035 Library:NIST20R.lib

SI:95 Formula:C18H32O2 CAS:60-33-3 MolWeight:280 RetIndex:2183

CompName:9,12-Octadecadienoic acid (Z,Z)- \$\$ cis-9,cis-12-Octadecadienoic acid \$\$ cis,cis-Linoleic acid \$\$ Grape seed oil \$\$ Linoleic acid \$

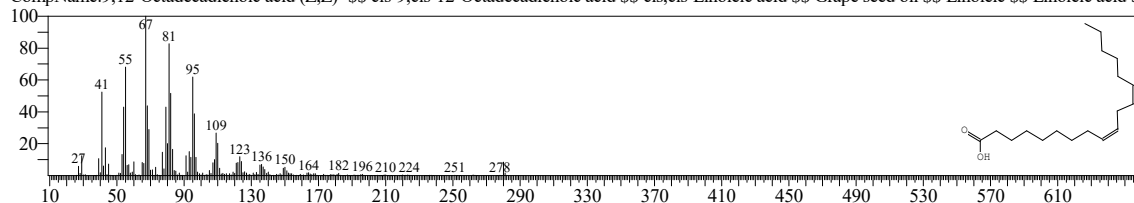

Hit#:2 Entry:139651 Library:NIST20M1.lib

SI:95 Formula:C18H32O2 CAS:544-71-8 MolWeight:280 RetIndex:2183

CompName:(9E,11E)-Octadecadienoic acid

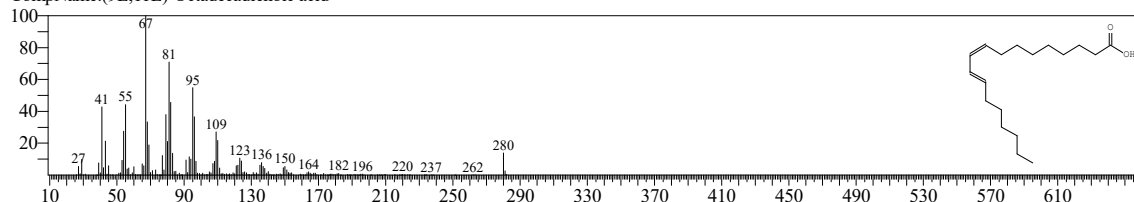

Hit#:3 Entry:139646 Library:NIST20M1.lib

SI:94 Formula:C18H32O2 CAS:2420-56-6 MolWeight:280 RetIndex:2183

CompName:10E,12Z-Octadecadienoic acid

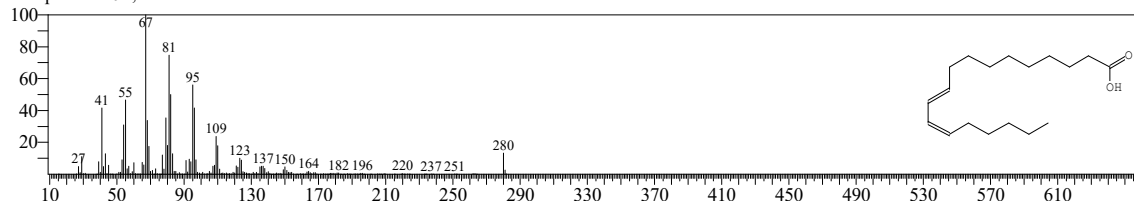

Hit#:4 Entry:139661 Library:NIST20M1.lib

SI:94 Formula:C18H32O2 CAS:506-21-8 MolWeight:280 RetIndex:2183

CompName:Linoelaidic acid

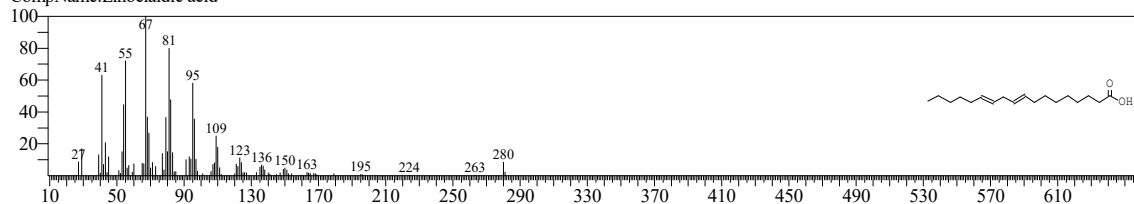

Hit#:5 Entry:173215 Library:NIST20M1.lib

SI:93 Formula:C20H36O2 CAS:2091-39-6 MolWeight:308 RetIndex:2382

CompName:11,14-Eicosadienoic acid

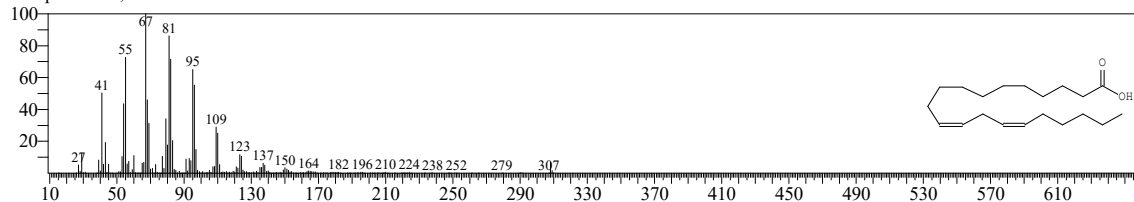

# TNAU

<< Target >>

Line#:14 R.Time:31.580(Scan#:5317) MassPeaks:384

RawMode:Averaged 31.575-31.585(5316-5318) BasePeak:55.05(1664)

BG Mode:Calc. from Peak Group 1 - Event 1 Q3 Scan

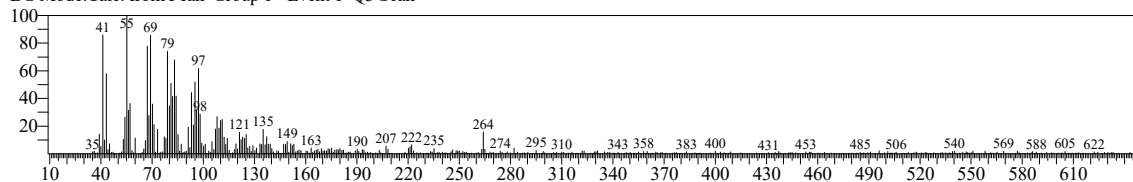

Hit#:1 Entry:92244 Library:NIST20M1.lib

SI:88 Formula:C16H30O CAS:56219-04-6 MolWeight:238 RetIndex:1808

CompName:cis-9-Hexadecenal \$ 9-Hexadecenal, (Z)- \$ (Z)-9-Hexadecenal \$ Z-9-Hexadecenal \$ (9Z)-9-Hexadecenal #

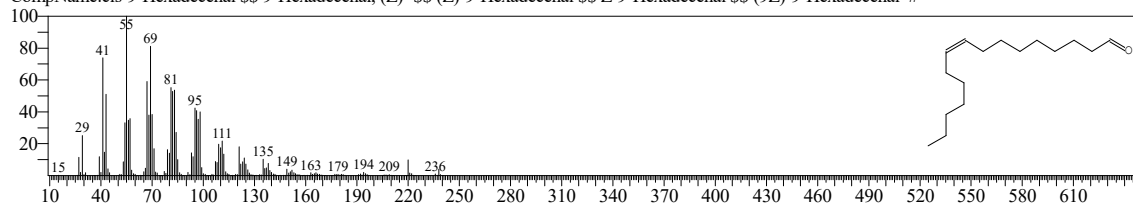

Hit#:2 Entry:123421 Library:NIST20M1.lib

SI:87 Formula:C18H34O CAS:2423-10-1 MolWeight:266 RetIndex:2007

CompName:9-Octadecenal, (Z)- \$ Olealdehyde \$ cis-9-Octadecenal \$ Oleylaldehyde \$ Z-9-Octadecenal \$ (9Z)-9-Octadecenal #

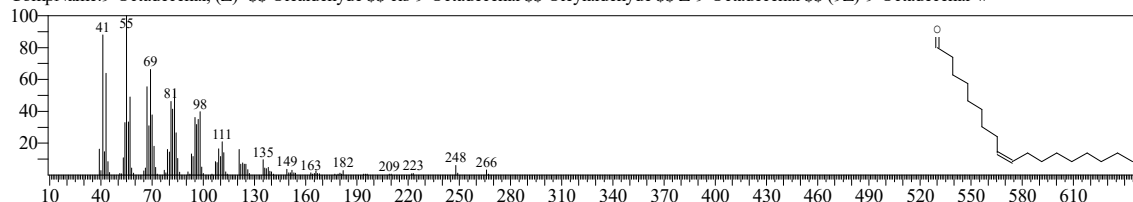

Hit#:3 Entry:156549 Library:NIST20M1.lib

SI:87 Formula:C19H34O2 CAS:0-00-0 MolWeight:294 RetIndex:2241

CompName:E,E,Z-1,3,12-Nonadecatriene-5,14-diol \$ (3E,12Z)-1,3,12-Nonadecatriene-5,14-diol #

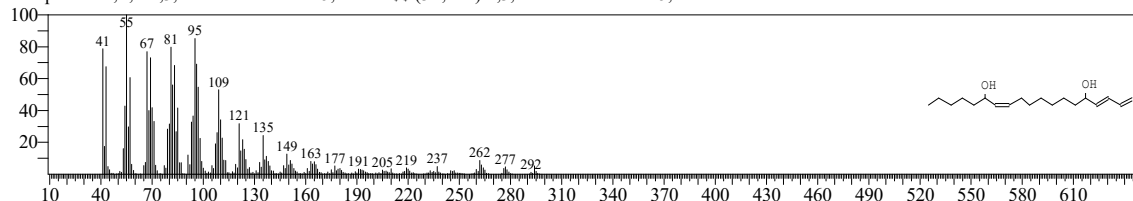

Hit#:4 Entry:63176 Library:NIST20M1.lib

SI:87 Formula:C14H26O CAS:65128-96-3 MolWeight:210 RetIndex:1609

CompName:7-Tetradecenal, (Z)- \$ Z-7-Tetradecenal \$ (7Z)-7-Tetradecenal #

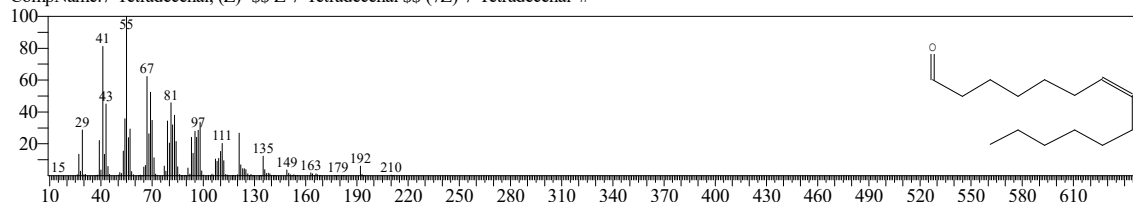

Hit#:5 Entry:92227 Library:NIST20M1.lib

SI:86 Formula:C16H30O CAS:56797-40-1 MolWeight:238 RetIndex:1808

CompName:7-Hexadecenal, (Z)- \$ (Z)-7-Hexadecenal \$ Z-7-Hexadecenal \$ (7Z)-7-Hexadecenal #

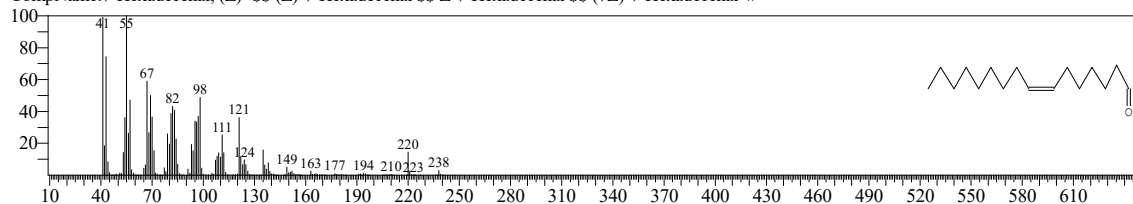

# TNAU

<< Target >>

Line#:15 R.Time:32.030(Scan#:5407) MassPeaks:300

RawMode:Averaged 32.025-32.035(5406-5408) BasePeak:73.05(1316)

BG Mode:Calc. from Peak Group 1 - Event 1 Q3 Scan

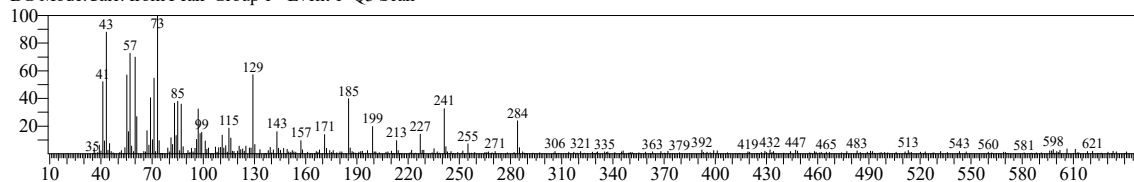

Hit#:1 Entry:34463 Library:NIST20R.lib

SI:94 Formula:C18H36O2 CAS:57-11-4 MolWeight:284 RetIndex:2167

CompName:Octadecanoic acid \$\$ Stearic acid \$\$ n-Octadecanoic acid \$\$ Humko Industriene R \$\$ Hydrofol Acid 150 \$\$ Hystrene S-97 \$\$ Hystrene T-70 \$

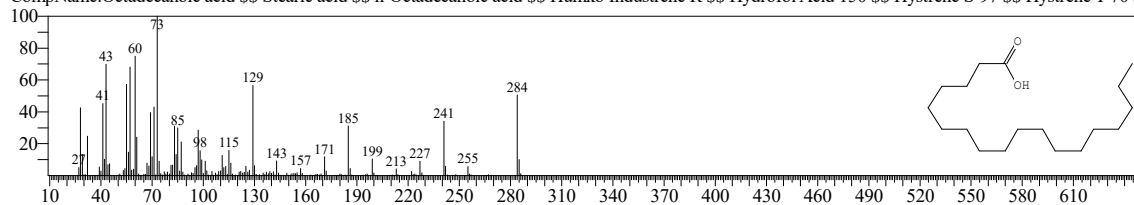

Hit#:2 Entry:29890 Library:NIST20R.lib

SI:90 Formula:C15H30O2 CAS:1002-84-2 MolWeight:242 RetIndex:1869

CompName:Pentadecanoic acid \$\$ Pentadecylic acid \$\$ n-Pentadecanoic acid \$\$ n-Pentadecylic acid

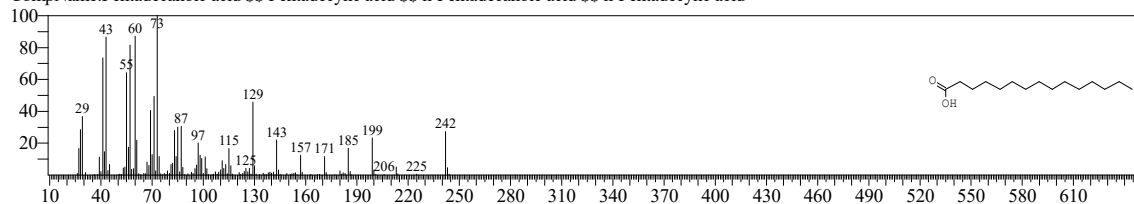

Hit#:3 Entry:178153 Library:NIST20M1.lib

SI:88 Formula:C20H40O2 CAS:506-30-9 MolWeight:312 RetIndex:2366

CompName:Eicosanoic acid \$\$ Arachic acid \$\$ Arachidic acid \$\$ Icosanoic acid \$\$ n-Eicosanoic acid \$\$ Arachidic acid (synthetic)

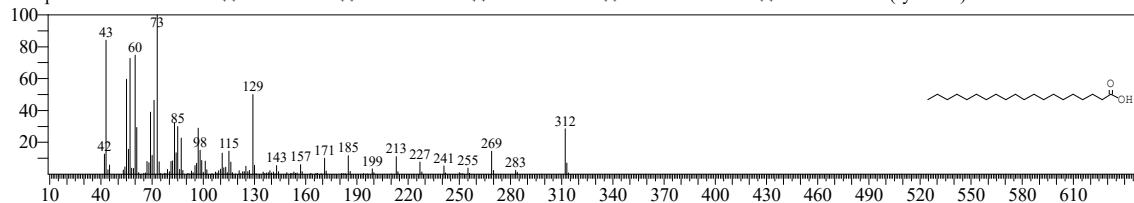

Hit#:4 Entry:31599 Library:NIST20R.lib

SI:87 Formula:C16H32O2 CAS:57-10-3 MolWeight:256 RetIndex:1968

CompName:n-Hexadecanoic acid \$\$ Hexadecanoic acid \$\$ n-Hexadecoic acid \$\$ Palmitic acid \$\$ Pentadecanecarboxylic acid \$\$ 1-Pentadecanecarboxylic

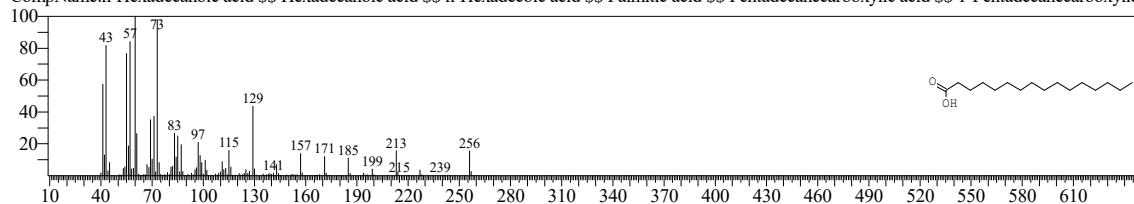

Hit#:5 Entry:44286 Library:NIST20M2.lib

SI:87 Formula:C38H68O8 CAS:28474-90-0 MolWeight:652 RetIndex:4765

CompName:L-(+)-Ascorbic acid 2,6-dihexadecanoate

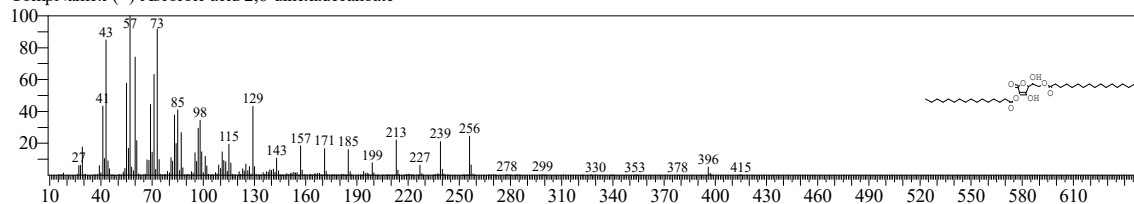



# TNAU

<< Target >>

Line#:16 R.Time:41.590(Scan#:7319) MassPeaks:409

RawMode:Averaged 41.585-41.595(7318-7320) BasePeak:355.10(910)

BG Mode:Calc. from Peak Group 1 - Event 1 Q3 Scan

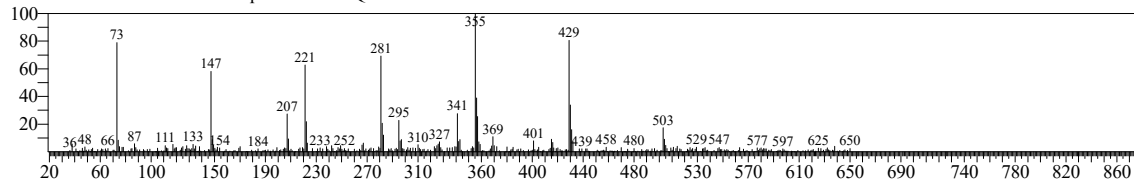

Hit#:1 Entry:46368 Library:NIST20M2.lib

SI:84 Formula:C<sub>24</sub>H<sub>72</sub>O<sub>12</sub>Si<sub>12</sub> CAS:18919-94-3 MolWeight:888 RetIndex:2480

CompName:Tetracosamethyl-cyclododecasiloxane \$\$ 2,2,4,4,6,6,8,8,10,10,12,12,14,14,16,16,18,18,20,20,22,22,24,24-Tetracosamethylcyclododecasiloxane

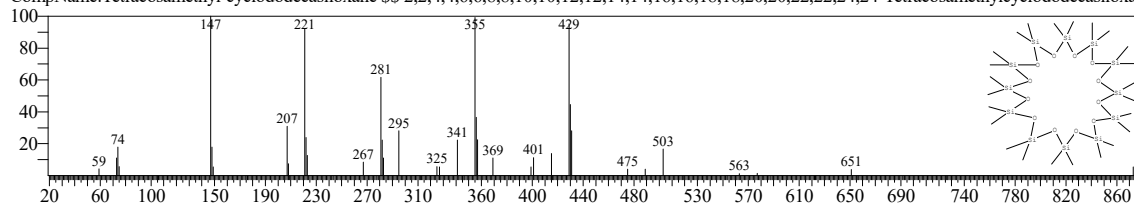

Hit#:2 Entry:45685 Library:NIST20M2.lib

SI:80 Formula:C<sub>20</sub>H<sub>60</sub>O<sub>10</sub>Si<sub>10</sub> CAS:18772-36-6 MolWeight:740 RetIndex:2067

CompName:Cyclododecasiloxane, eicosamethyl- \$\$ 2,2,4,4,6,6,8,8,10,10,12,12,14,14,16,16,18,18,20,20-Icosamethylcyclododecasiloxane # \$\$ Eicosamethyl-cy

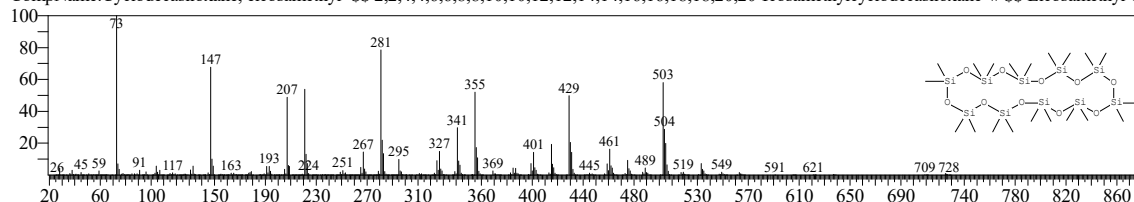

Hit#:3 Entry:44570 Library:NIST20M2.lib

SI:80 Formula:C<sub>18</sub>H<sub>54</sub>O<sub>9</sub>Si<sub>9</sub> CAS:556-71-8 MolWeight:666 RetIndex:1860

CompName:Cyclononasiloxane, octadecamethyl- \$\$ Octadecamethyl-cyclononasiloxane \$\$ 2,2,4,4,6,6,8,8,10,10,12,12,14,14,16,16,18,18-Octadecamethylcy

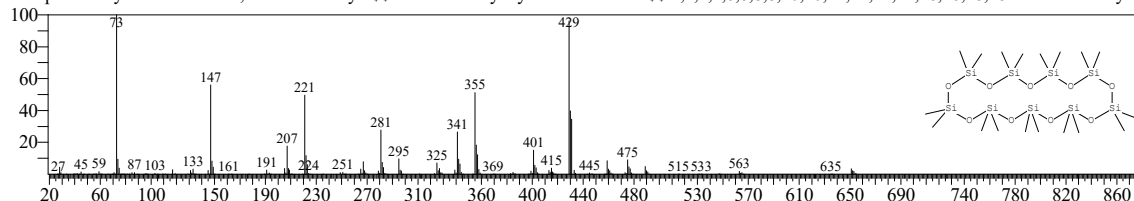

Hit#:4 Entry:42942 Library:NIST20M2.lib

SI:73 Formula:C<sub>18</sub>H<sub>54</sub>O<sub>7</sub>Si<sub>8</sub> CAS:556-69-4 MolWeight:606 RetIndex:1622

CompName:1,1,1,3,3,5,5,7,7,9,9,11,11,13,13,15,15-octadecamethyloctasiloxane \$\$ Polydimethylsilane Oil

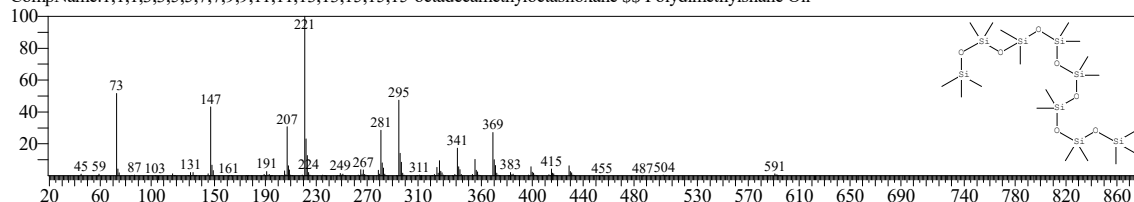

Hit#:5 Entry:43312 Library:NIST20R.lib

SI:73 Formula:C<sub>16</sub>H<sub>48</sub>O<sub>6</sub>Si<sub>7</sub> CAS:541-01-5 MolWeight:532 RetIndex:1437

CompName:Heptasiloxane, hexadecamethyl- \$\$ Hexadecamethylheptasiloxane \$\$ 1,1,1,3,3,5,5,7,7,9,9,11,11,13,13,13-Hexadecamethylheptasiloxane #

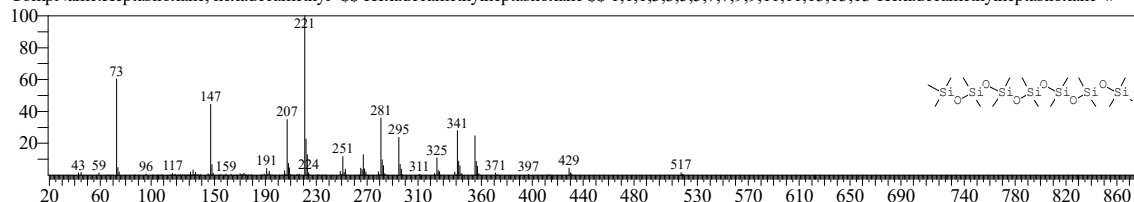

# TNAU

<< Target >>

Line#:17 R.Time:43.795(Scan#:7760) MassPeaks:343

RawMode:Averaged 43.790-43.800(7759-7761) BasePeak:221.00(671)

BG Mode:Calc. from Peak Group 1 - Event 1 Q3 Scan

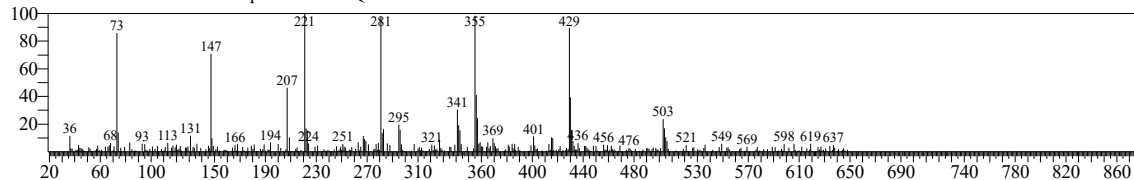

Hit#:1 Entry:46368 Library:NIST20M2.lib

SI:80 Formula:C<sub>24</sub>H<sub>72</sub>O<sub>12</sub>Si<sub>12</sub> CAS:18919-94-3 MolWeight:888 RetIndex:2480

CompName:Tetracosamethyl-cyclododecasiloxane \$ 2,2,4,4,6,6,8,8,10,10,12,12,14,14,16,16,18,18,20,20,22,22,24,24-Tetracosamethylcyclododecasiloxan



Hit#:2 Entry:45685 Library:NIST20M2.lib

SI:78 Formula:C<sub>20</sub>H<sub>60</sub>O<sub>10</sub>Si<sub>10</sub> CAS:18772-36-6 MolWeight:740 RetIndex:2067

CompName:Cyclodecasiloxane, eicosamethyl- \$ 2,2,4,4,6,6,8,8,10,10,12,12,14,14,16,16,18,18,20,20-Icosamethylcyclodecasiloxane # \$ Eicosamethyl-cy



Hit#:3 Entry:43658 Library:NIST20R.lib

SI:75 Formula:C<sub>18</sub>H<sub>54</sub>O<sub>9</sub>Si<sub>9</sub> CAS:556-71-8 MolWeight:666 RetIndex:1860

CompName:Cyclononasiloxane, octadecamethyl- \$ Octadecamethyl-cyclononasiloxane \$ 2,2,4,4,6,6,8,8,10,10,12,12,14,14,16,16,18,18-Octadecamethylcy

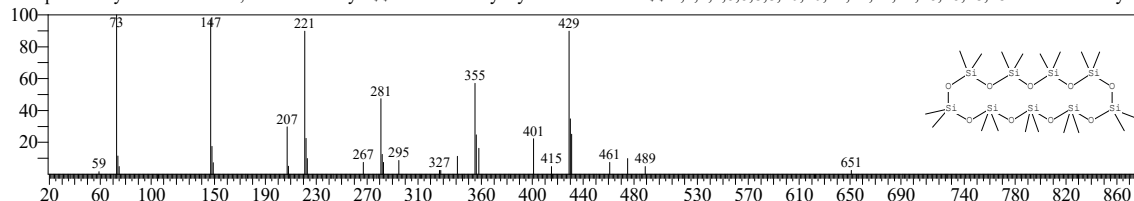

Hit#:4 Entry:402 Library:OA\_TMS\_DB5\_67min\_V3.lib

SI:55 Formula:C<sub>20</sub>H<sub>42</sub>O<sub>4</sub>Si<sub>4</sub> CAS:775-01-9 MolWeight:458 RetIndex:1942

CompName:3,4-Dihydroxymandelic acid-4TMS ; 2-(3,4-dihydroxyphenyl)-2-hydroxyacetic acid

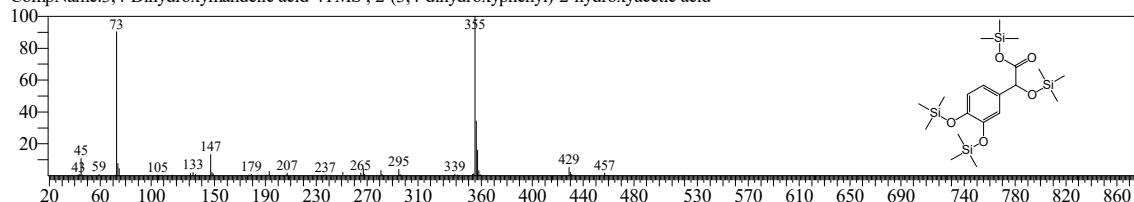

Hit#:5 Entry:343 Library:OA\_TMS\_DB5\_67min\_V3.lib

SI:43 Formula:C<sub>18</sub>H<sub>37</sub>NO<sub>3</sub>Si<sub>3</sub> CAS:51-43-4 MolWeight:399 RetIndex:1868

CompName:Epinephrine-3TMS ; 4-[(1R)-1-hydroxy-2-(methylamino)ethyl]benzene-1,2-diol

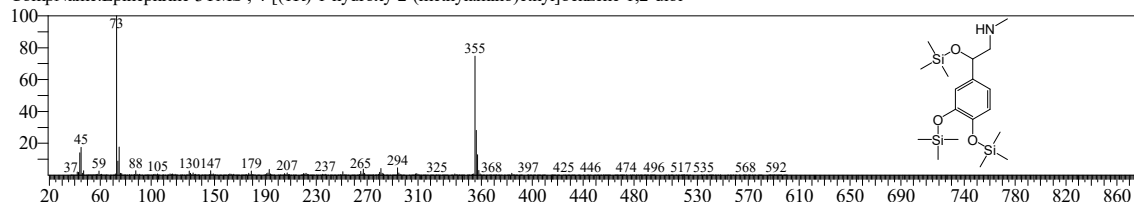

# TNAU

<< Target >>

Line#:18 R.Time:44.165(Scan#:7834) MassPeaks:337

RawMode:Averaged 44.160-44.170(7833-7835) BasePeak:59.05(934)

BG Mode:Calc. from Peak Group 1 - Event 1 Q3 Scan

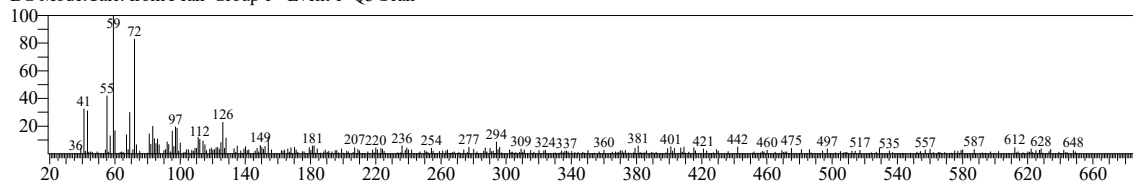

Hit#:1 Entry:206446 Library:NIST20M1.lib

SI:81 Formula:C22H43NO CAS:112-84-5 MolWeight:337 RetIndex:2625

CompName:13-Docosenamide, (Z)- \$\$ Erucylamide \$\$ Erucyl amide \$\$ (Z)-13-Docosenamide \$\$ 13-Docosenamide, cis- \$\$ Armid E \$\$ cis-13-Docosenan

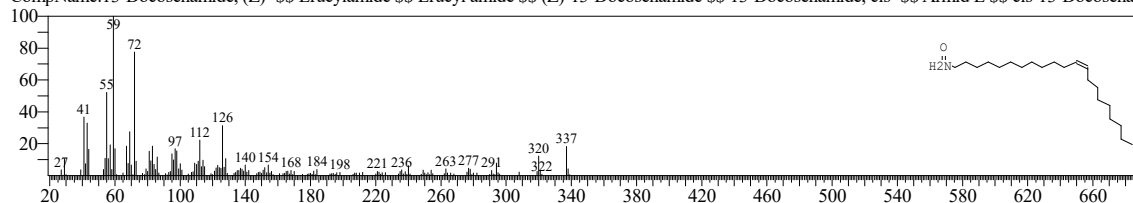

Hit#:2 Entry:34121 Library:NIST20R.lib

SI:79 Formula:C18H35NO CAS:301-02-0 MolWeight:281 RetIndex:2228

CompName:9-Octadecenamide, (Z)- \$\$ Adogen 73 \$\$ Oleamide \$\$ Oleic acid amide \$\$ Oleyl amide \$\$ Slip-eze \$\$ Armoslip CP \$\$ Crodamide O \$\$ Crod

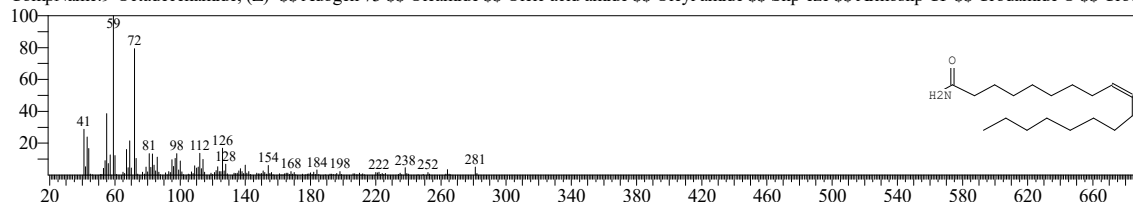

Hit#:3 Entry:108453 Library:NIST20M1.lib

SI:76 Formula:C16H31NO CAS:106010-22-4 MolWeight:253 RetIndex:2029

CompName:Palmitoleamide \$\$ 9-Hexadecenamide, (9Z)- \$\$ 9-Hexadecenamide, (Z)- \$\$ (Z)-Hexadec-9-enamide

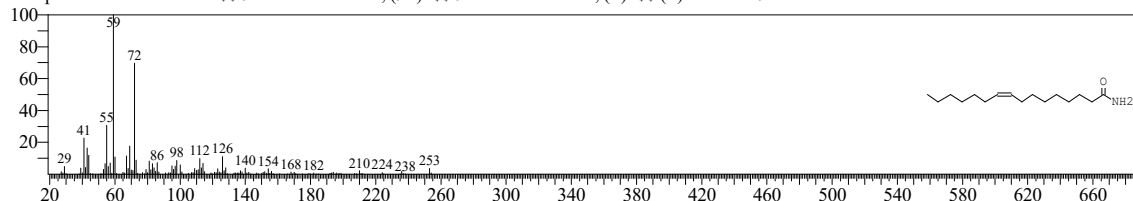

Hit#:4 Entry:140706 Library:NIST20M1.lib

SI:75 Formula:C18H35NO CAS:3322-62-1 MolWeight:281 RetIndex:2228

CompName:9-Octadecenamide \$\$ Armid ow \$\$ Armoslip cp \$\$ 9-Oleoamide

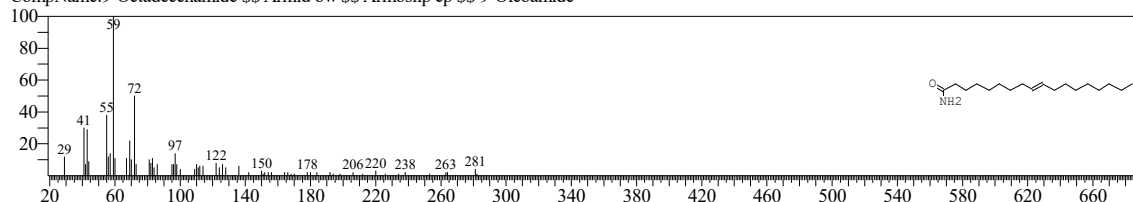

Hit#:5 Entry:44970 Library:NIST20M2.lib

SI:73 Formula:C45H86N2O2 CAS:10436-19-8 MolWeight:686 RetIndex:5311

CompName:Bis(cis-13-docosenamido)methane \$\$ (13Z)-N-([(13Z)-13-Docosenoylamino]methyl)-13-docosenamide #

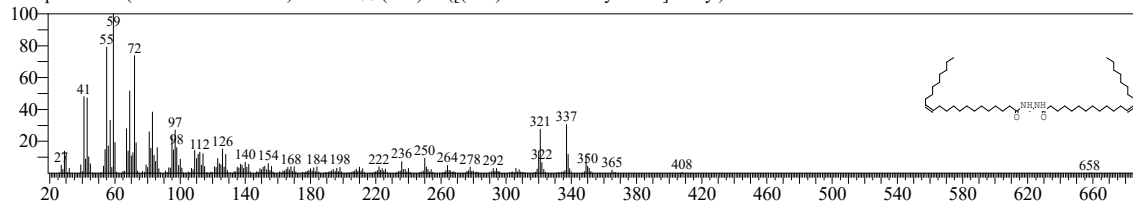

# TNAU

<< Target >>

Line#:19 R.Time:45.585(Scan#:8118) MassPeaks:415

RawMode:Averaged 45.580-45.590(8117-8119) BasePeak:139.10(2093)

BG Mode:Calc. from Peak Group 1 - Event 1 Q3 Scan

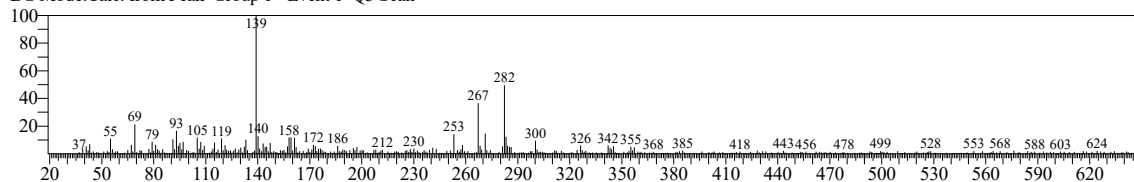

Hit#:1 Entry:8297 Library:NIST20M2.lib

SI:82 Formula:C27H42O3 CAS:512-04-9 MolWeight:414 RetIndex:2844

CompName:Diosgenin \$\$ Spirost-5-en-3-ol, (3.beta.,25R)- \$\$ Spirost-5-en-3.beta.-ol, (25R)- \$\$ Nitrogenin \$\$ 25D-spirost-5-en-3.beta.-ol \$\$ Spiro(8H-nap

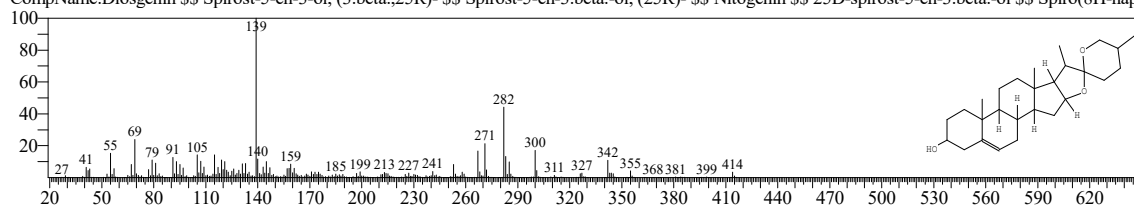

Hit#:2 Entry:24878 Library:NIST20M2.lib

SI:78 Formula:C29H44O4 CAS:1061-54-7 MolWeight:456 RetIndex:2984

CompName:Spirost-5-en-3-ol, acetate, (3.beta.,25R)- \$\$ Diosgenin acetate \$\$ Spirost-5-en-3.beta.-ol, acetate, (25R)- \$\$ Spirost-5-en-3.beta.-ol, acetate, (2-

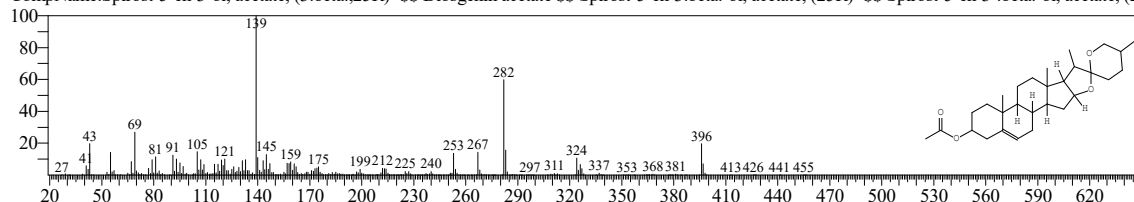

Hit#:3 Entry:41561 Library:NIST20R.lib

SI:77 Formula:C27H42O2 CAS:32277-73-9 MolWeight:398 RetIndex:2713

CompName:Des-N-solasodine \$\$ Furosta-5,20(22)-dien-3-ol #

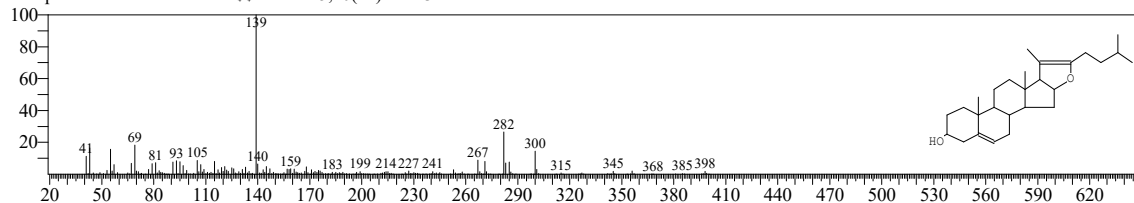

Hit#:4 Entry:14852 Library:NIST20M2.lib

SI:76 Formula:C28H44O3 CAS:116292-24-1 MolWeight:428 RetIndex:2793

CompName:Diosgenin methyl ether \$\$ Diosgenin Me derivative \$\$ (3.beta.,25R)-3-Methoxyspirost-5-ene \$\$ Spirost-5-ene, 3-methoxy-, (3.beta.,25R)-

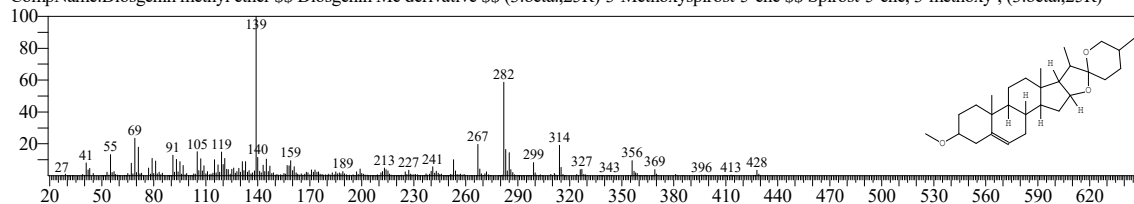

Hit#:5 Entry:42677 Library:NIST20R.lib

SI:73 Formula:C29H44O4 CAS:1180-12-7 MolWeight:456 RetIndex:2984

CompName:Neodiosgenin (3.beta.,25S) acetate \$\$ Spirost-5-en-3-ol, 3-acetate, (3.beta.,25S)- \$\$ Spirost-5-en-3-ol, acetate, (3.beta.,25S)- \$\$ Spirost-5-en-3-

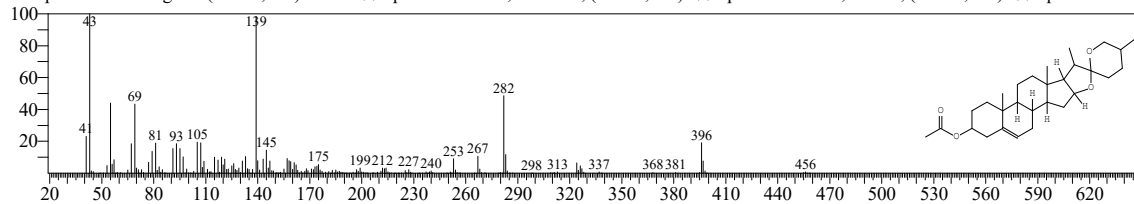

# TNAU

<< Target >>

Line#:20 R.Time:45.615(Scan#:8124) MassPeaks:332

RawMode:Averaged 45.610-45.620(8123-8125) BasePeak:139.10(586)

BG Mode:Calc. from Peak Group 1 - Event 1 Q3 Scan

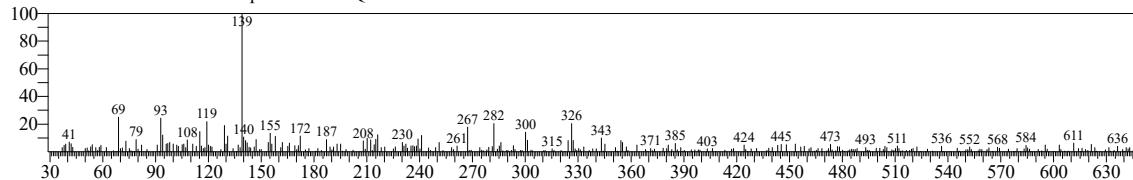

Hit#:1 Entry:438 Library:OA\_TMS\_DB5\_67min\_V3.lib

SI:27 Formula:C12H22N2O2Si2 CAS:104-98-3 MolWeight:282 RetIndex:2014

CompName:Urocanic acid-2TMS ; (E)-3-(1H-imidazol-5-yl)prop-2-enoic acid

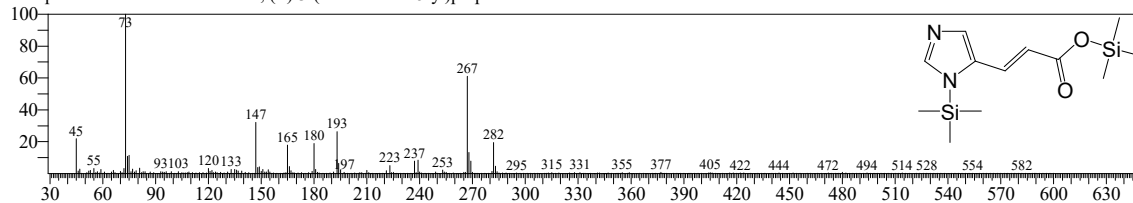

Hit#:2 Entry:173 Library:OA\_TMS\_DB5\_67min\_V3.lib

SI:27 Formula:C15H30O3Si3 CAS:87-66-1 MolWeight:342 RetIndex:1559

CompName:Pyrogallol-3TMS ; benzene-1,2,3-triol

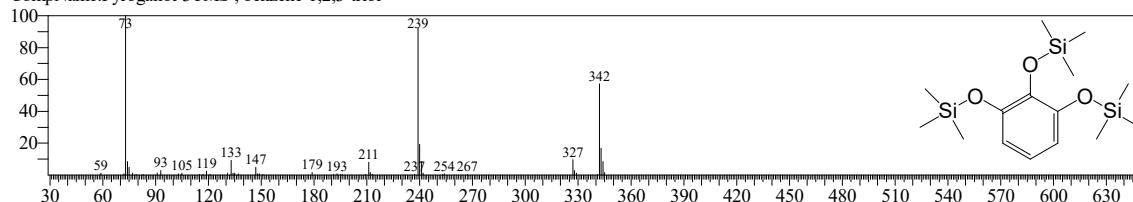

Hit#:3 Entry:258 Library:OA\_TMS\_DB5\_67min\_V3.lib

SI:26 Formula:C14H30O4Si2 CAS:505-48-6 MolWeight:318 RetIndex:1700

CompName:Suberic acid-2TMS ; octanedioic acid

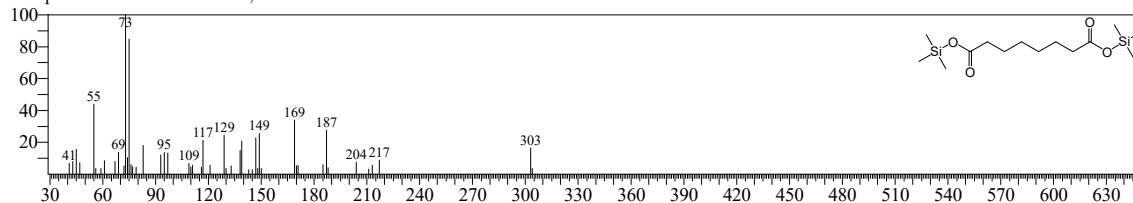

Hit#:4 Entry:6 Library:OA\_TMS\_DB5\_67min\_V3.lib

SI:26 Formula:C5H9Cl3O2Si CAS:76-03-9 MolWeight:234 RetIndex:1059

CompName:Trichloroacetic acid-TMS ; 2,2,2-trichloroacetic acid

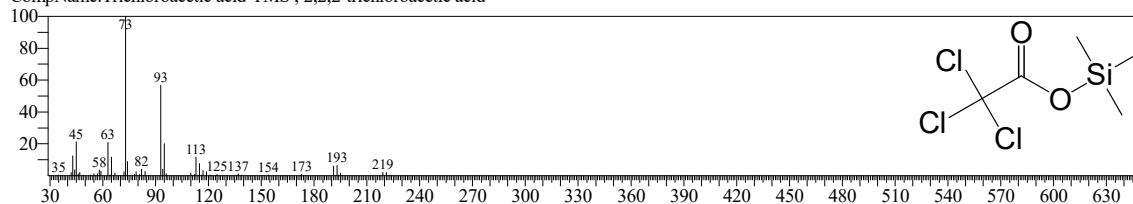

Hit#:5 Entry:164 Library:OA\_TMS\_DB5\_67min\_V3.lib

SI:26 Formula:C14H33NO3Si3 CAS:51-35-4 MolWeight:347 RetIndex:1538

CompName:4-Hydroxyproline-3TMS ; (2S,4R)-4-hydroxyproline-2-carboxylic acid

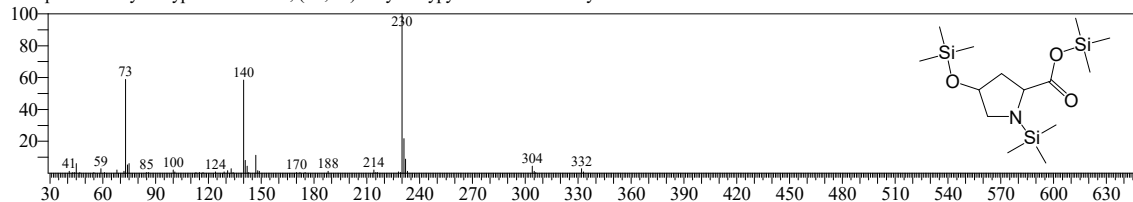

# TNAU

<< Target >>

Line#:21 R.Time:45.770(Scan#:8155) MassPeaks:359

RawMode:Averaged 45.765-45.775(8154-8156) BasePeak:355.05(798)

BG Mode:Calc. from Peak Group 1 - Event 1 Q3 Scan

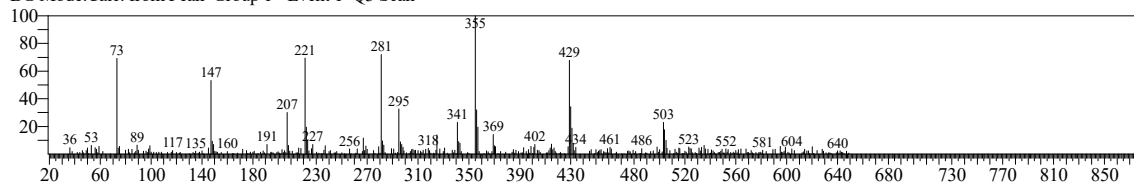

Hit#:1 Entry:46368 Library:NIST20M2.lib

SI:81 Formula:C<sub>24</sub>H<sub>72</sub>O<sub>12</sub>Si<sub>12</sub> CAS:18919-94-3 MolWeight:888 RetIndex:2480

CompName:Tetracosamethyl-cyclododecasiloxane \$\$ 2,2,4,4,6,6,8,8,10,10,12,12,14,14,16,16,18,18,20,20,22,22,24,24-Tetracosamethylcyclododecasiloxane

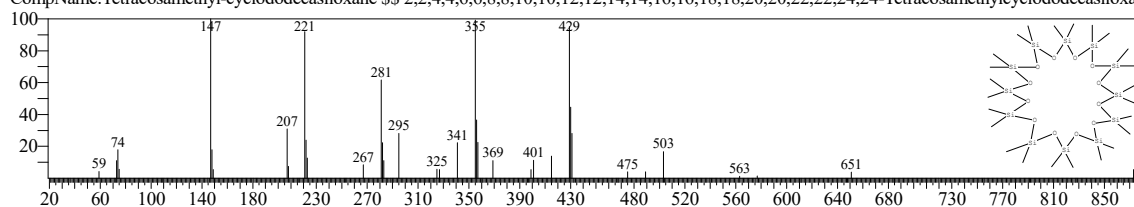

Hit#:2 Entry:45685 Library:NIST20M2.lib

SI:77 Formula:C<sub>20</sub>H<sub>60</sub>O<sub>10</sub>Si<sub>10</sub> CAS:18772-36-6 MolWeight:740 RetIndex:2067

CompName:Cyclodecasiloxane, eicosamethyl- \$\$ 2,2,4,4,6,6,8,8,10,10,12,12,14,14,16,16,18,18,20,20-Icosamethylcyclodecasiloxane # \$\$ Eicosamethyl-cy

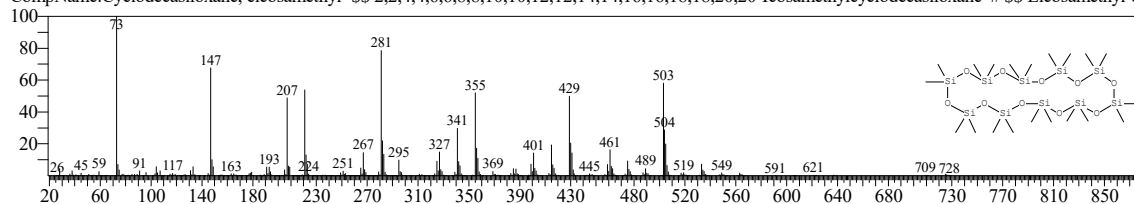

Hit#:3 Entry:44570 Library:NIST20M2.lib

SI:75 Formula:C<sub>18</sub>H<sub>54</sub>O<sub>9</sub>Si<sub>9</sub> CAS:556-71-8 MolWeight:666 RetIndex:1860

CompName:Cyclononasiloxane, octadecamethyl- \$\$ Octadecamethyl-cyclononasiloxane \$\$ 2,2,4,4,6,6,8,8,10,10,12,12,14,14,16,16,18,18-Octadecamethylcy

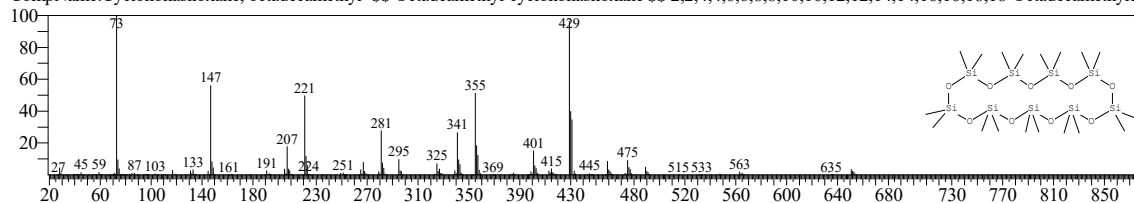

Hit#:4 Entry:42942 Library:NIST20M2.lib

SI:73 Formula:C<sub>18</sub>H<sub>54</sub>O<sub>7</sub>Si<sub>8</sub> CAS:556-69-4 MolWeight:606 RetIndex:1622

CompName:1,1,1,3,3,5,5,7,7,9,9,11,11,13,13,15,15-octadecamethyloctasiloxane \$\$ Polydimethylsilane Oil

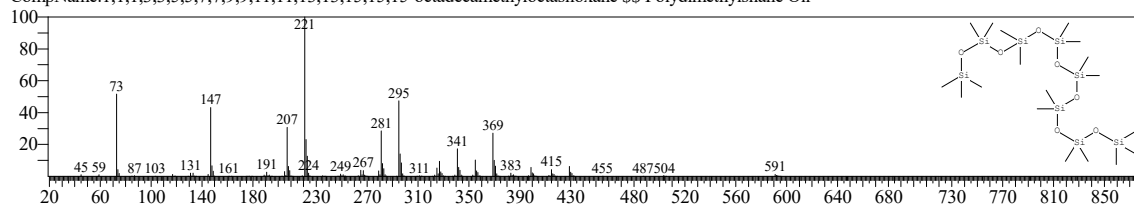

Hit#:5 Entry:43312 Library:NIST20R.lib

SI:72 Formula:C<sub>16</sub>H<sub>48</sub>O<sub>6</sub>Si<sub>7</sub> CAS:541-01-5 MolWeight:532 RetIndex:1437

CompName:Heptasiloxane, hexadecamethyl- \$\$ Hexadecamethylheptasiloxane \$\$ 1,1,1,3,3,5,5,7,7,9,9,11,11,13,13,13-Hexadecamethylheptasiloxane #

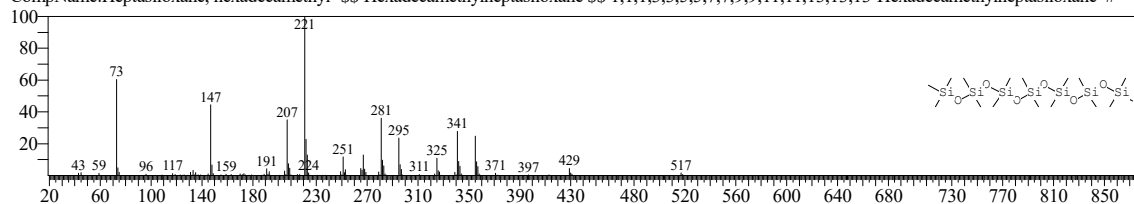

Supplement: Supplementary file 50 [file supplementary]
