# Supplementary material for: Comparative Metabolomics Profiling Reveals Key Metabolites and Associated Pathways Regulating Tuber Dormancy in White Yam (<em>Dioscorea rotundata</em>)
Source: Preprints.org preprint supplement (doi:10.20944/preprints202303.0378.v1), 2023-03-21

# TNAU

## Sample Information

Analyzed by : Admin  
 Analyzed : 05-Aug-22 3:18:21 AM  
 Sample Type : Unknown  
 Level # : 1  
 Sample Name : C143-1  
 Sample ID : C143-1  
 IS Amount : [1]=1  
 Sample Amount : 1  
 Dilution Factor : 1  
 Vial # : 17  
 Injection Volume : 1.00  
 Data File : D:\GCMS-8040NX\Aug 2022\Users\04.08.2022\Data files\04082022-017.qgd  
 Org Data File : D:\GCMS-8040NX\Aug 2022\Users\04.08.2022\Data files\04082022-017.qgd  
 Method File : D:\GCMS-8040NX\Aug 2022\Users\04.08.2022\Method file\27072022\_methodfile.qgm  
 Org Method File : D:\GCMS-8040NX\Aug 2022\Users\04.08.2022\Method file\27072022\_methodfile.qgm  
 Report File :  
 Tuning File : D:\GCMS-8040NX\Aug 2022\Tuning Data\TUNING 04082022.qgt  
 [Comment]  
 Jerry samples  
 Modified by : Admin  
 Modified : 05-Aug-22 4:33:13 PM

Chromatogram C143-1 D:\GCMS-8040NX\Aug 2022\Users\04.08.2022\Data files\04082022-017.qgd

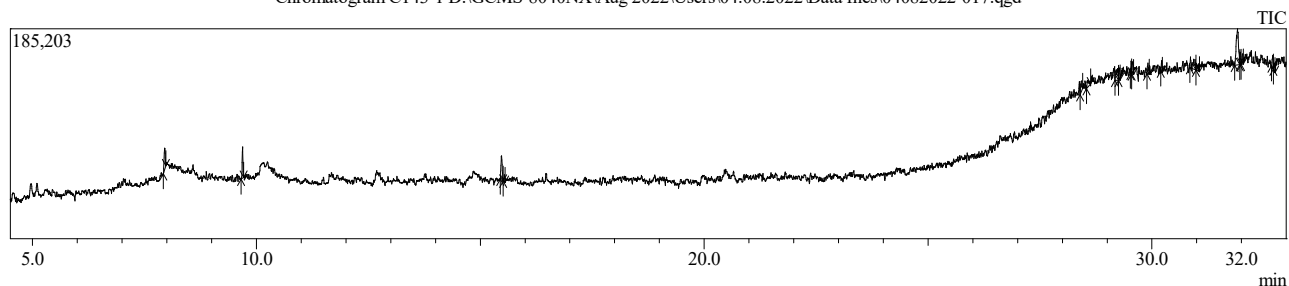

Peak Report TIC

| Peak# | R.Time | Area   | Area%  | Height | Height% | A/H  | Similarity | Name                                        |
|-------|--------|--------|--------|--------|---------|------|------------|---------------------------------------------|
| 1     | 7.950  | 35358  | 7.57   | 18948  | 8.19    | 1.87 | 88         | Octane, 3,4,5,6-tetramethyl-                |
| 2     | 9.690  | 35277  | 7.56   | 27532  | 11.90   | 1.28 | 90         | Tridecane                                   |
| 3     | 15.473 | 39330  | 8.42   | 21206  | 9.17    | 1.85 | 89         | 2,4-Di-tert-butylphenol                     |
| 4     | 15.540 | 7077   | 1.52   | 6278   | 2.71    | 1.13 | 37         | Juniperic acid-2TMS                         |
| 5     | 28.428 | 17455  | 3.74   | 8663   | 3.74    | 2.01 | 33         | Shikimic acid-4TMS                          |
| 6     | 28.550 | 17699  | 3.79   | 5355   | 2.31    | 3.31 | 39         | Juniperic acid-2TMS                         |
| 7     | 29.234 | 30507  | 6.53   | 10294  | 4.45    | 2.96 | 41         | 4-Aminobenzoic acid-2TMS                    |
| 8     | 29.278 | 16426  | 3.52   | 10967  | 4.74    | 1.50 | 35         | Epinephrine-3TMS                            |
| 9     | 29.536 | 12720  | 2.72   | 10878  | 4.70    | 1.17 | 36         | 3-Hydroxybenzoic acid-2TMS                  |
| 10    | 29.575 | 15700  | 3.36   | 9805   | 4.24    | 1.60 | 31         | 3,4-Dihydroxymandelic acid-4TMS             |
| 11    | 29.900 | 13790  | 2.95   | 6031   | 2.61    | 2.29 | 42         | Protocatechuic acid-3TMS                    |
| 12    | 30.215 | 8884   | 1.90   | 9962   | 4.31    | 0.89 | 34         | Isomaltose-meto-8TMS(2)                     |
| 13    | 30.861 | 34917  | 7.48   | 9613   | 4.15    | 3.63 | 40         | 2-Hydroxyisobutyric acid-2TMS               |
| 14    | 31.045 | 17490  | 3.75   | 6912   | 2.99    | 2.53 | 39         | 4-Hydroxybenzoic acid-2TMS                  |
| 15    | 31.910 | 112027 | 24.00  | 31623  | 13.67   | 3.54 | 36         | Methyl cis-4,7,10,13,16,19-Docosahexaenoate |
| 16    | 31.980 | 14694  | 3.15   | 9814   | 4.24    | 1.50 | 33         | Glucose-5TMS(1)                             |
| 17    | 32.030 | 14328  | 3.07   | 8937   | 3.86    | 1.60 | 27         | 3-(3-Hydroxyphenyl)-3-hydroxypropionic acid |
| 18    | 32.695 | 13717  | 2.94   | 11166  | 4.83    | 1.23 | 27         | 3,4-Dihydroxymandelic acid-4TMS             |
| 19    | 32.735 | 9465   | 2.03   | 7395   | 3.20    | 1.28 | 40         | Batyl alcohol-2TMS                          |
|       |        | 466861 | 100.00 | 231379 | 100.00  |      |            |                                             |

Library

# TNAU

<< Target >>

Line#:1 R.Time:7.950(Scan#:691) MassPeaks:289

RawMode:Averaged 7.945-7.955(690-692) BasePeak:43.05(4404)

BG Mode:Calc. from Peak Group 1 - Event 1 Q3 Scan

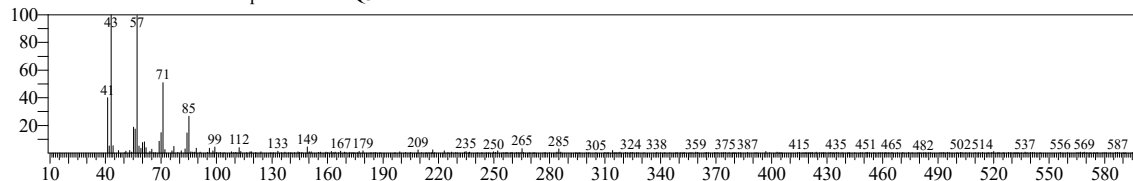

Hit#:1 Entry:30049 Library:NIST20M1.lib

SI:88 Formula:C12H26 CAS:62185-21-1 MolWeight:170 RetIndex:958

CompName:Octane, 3,4,5,6-tetramethyl- \$ 3,4,5,6-Tetramethyloctane #

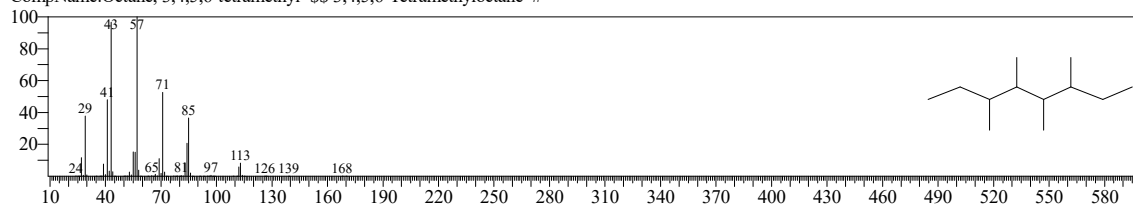

Hit#:2 Entry:40226 Library:NIST20M1.lib

SI:88 Formula:C13H28 CAS:629-50-5 MolWeight:184 RetIndex:1300

CompName:Tridecane \$ n-Tridecane \$ Tridecane, n-

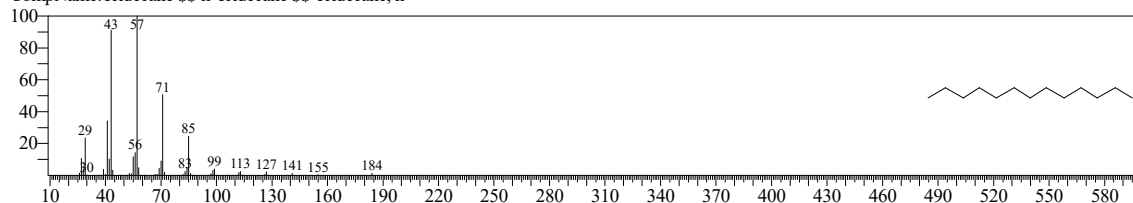

Hit#:3 Entry:16191 Library:NIST20R.lib

SI:87 Formula:C12H26 CAS:112-40-3 MolWeight:170 RetIndex:1200

CompName:Dodecane \$ n-Dodecane \$ Adakane 12 \$ Ba 51-090453 \$ CH3(CH2)10CH3 \$ Bihexyl \$ Dihexyl \$ Duodecane \$ NSC 8714

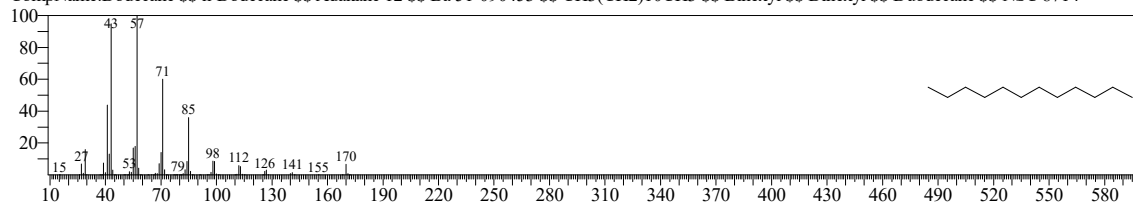

Hit#:4 Entry:12897 Library:NIST20R.lib

SI:87 Formula:C11H24 CAS:1120-21-4 MolWeight:156 RetIndex:1100

CompName:Undecane \$ n-Undecane \$ Hendecane \$ n-C11H24 \$ UN 2330

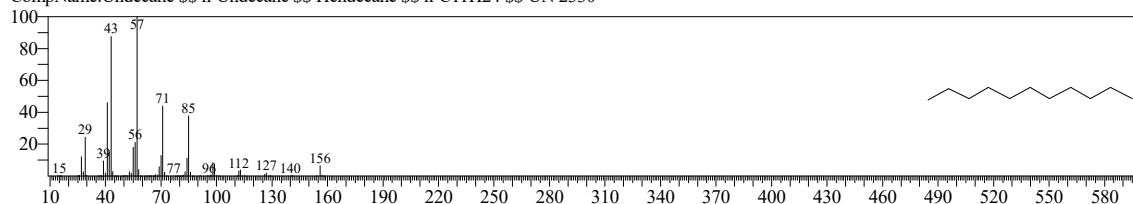

Hit#:5 Entry:21035 Library:NIST20M1.lib

SI:87 Formula:C11H24 CAS:62016-30-2 MolWeight:156 RetIndex:966

CompName:Octane, 2,3,3-trimethyl- \$ 2,3,3-Trimethyloctane #

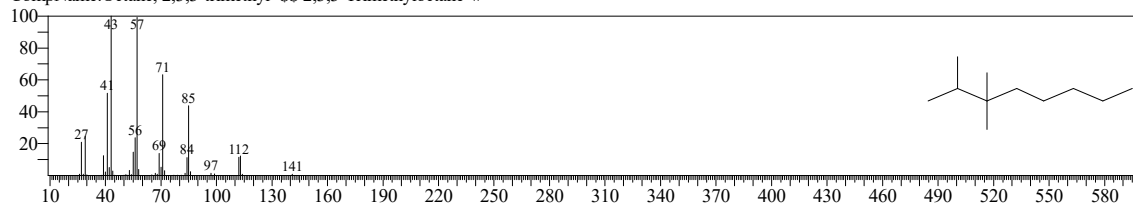

# TNAU

<< Target >>

Line# 2 R.Time: 9.690 (Scan#: 1039) MassPeaks: 288

RawMode: Averaged 9.685-9.695 (1038-1040) BasePeak: 57.10 (5841)

BG Mode: Calc. from Peak Group 1 - Event 1 Q3 Scan

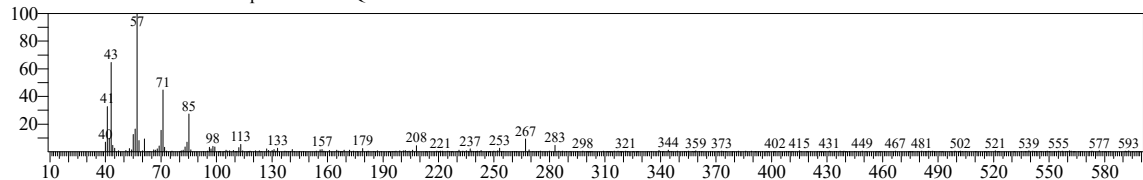

Hit#: 1 Entry: 40226 Library: NIST20M1.lib

SI: 90 Formula: C<sub>13</sub>H<sub>28</sub> CAS: 629-50-5 MolWeight: 184 RetIndex: 1300

CompName: Tridecane \$\$ n-Tridecane \$\$ Tridecane, n-

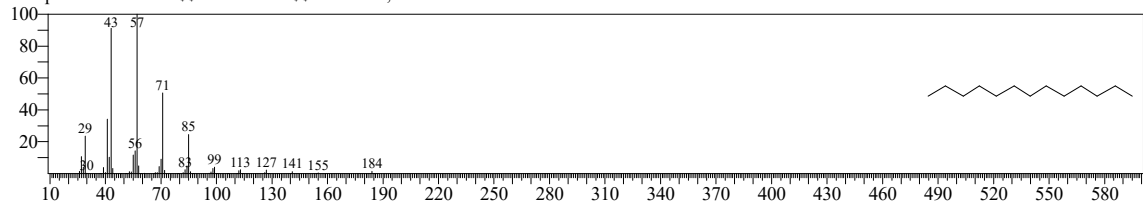

Hit#: 2 Entry: 21042 Library: NIST20M1.lib

SI: 89 Formula: C<sub>11</sub>H<sub>24</sub> CAS: 1120-21-4 MolWeight: 156 RetIndex: 1100

CompName: Undecane \$\$ n-Undecane \$\$ Hendecane \$\$ n-C<sub>11</sub>H<sub>24</sub> \$\$ UN 2330

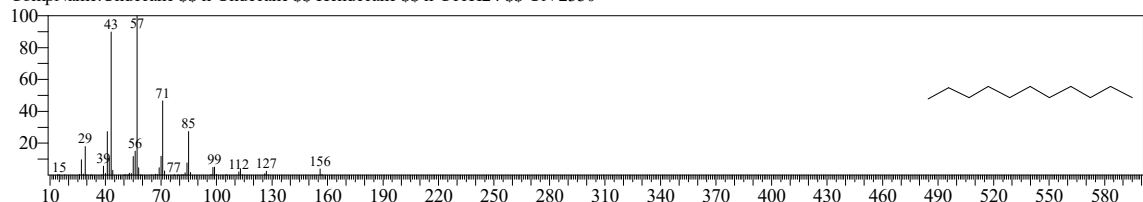

Hit#: 3 Entry: 30057 Library: NIST20M1.lib

SI: 89 Formula: C<sub>12</sub>H<sub>26</sub> CAS: 112-40-3 MolWeight: 170 RetIndex: 1200

CompName: Dodecane \$\$ n-Dodecane \$\$ Adakane 12 \$\$ Ba 51-090453 \$\$ CH<sub>3</sub>(CH<sub>2</sub>)<sub>10</sub>CH<sub>3</sub> \$\$ Bihexyl \$\$ Dihexyl \$\$ Duodecane \$\$ NSC 8714

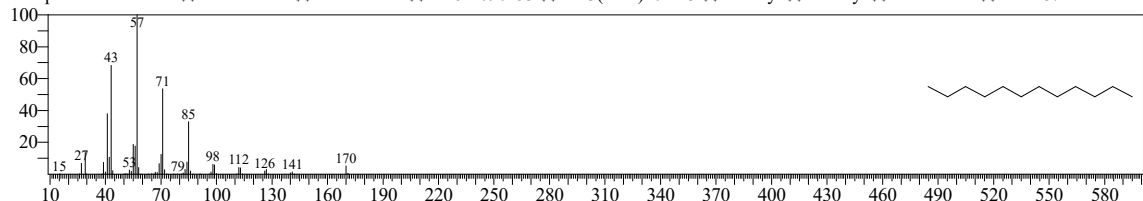

Hit#: 4 Entry: 27737 Library: NIST20R.lib

SI: 88 Formula: C<sub>16</sub>H<sub>34</sub> CAS: 544-76-3 MolWeight: 226 RetIndex: 1600

CompName: Hexadecane \$\$ n-Cetane \$\$ n-Hexadecane \$\$ Cetane

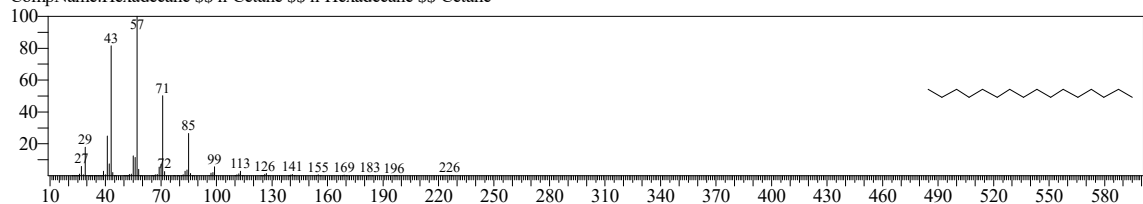

Hit#: 5 Entry: 109863 Library: NIST20M1.lib

SI: 88 Formula: C<sub>18</sub>H<sub>38</sub> CAS: 3892-00-0 MolWeight: 254 RetIndex: 1618

CompName: Pentadecane, 2,6,10-trimethyl- \$\$ 2,6,10-Trimethylpentadecane # \$\$ Nor-pristane

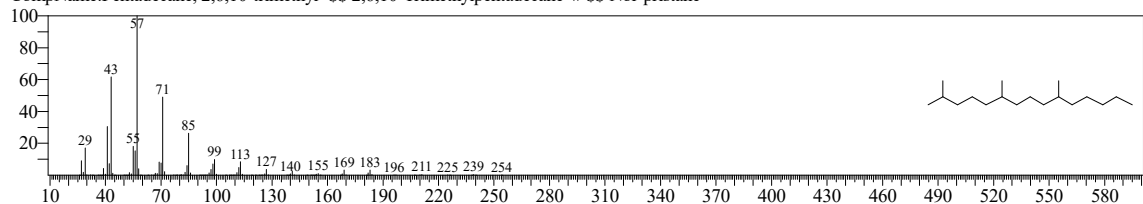

# TNAU

<< Target >>

Line#3 R.Time:15.475(Scan#:2196) MassPeaks:254

RawMode:Averaged 15.470-15.480(2195-2197) BasePeak:191.15(8013)

BG Mode:Calc. from Peak Group 1 - Event 1 Q3 Scan

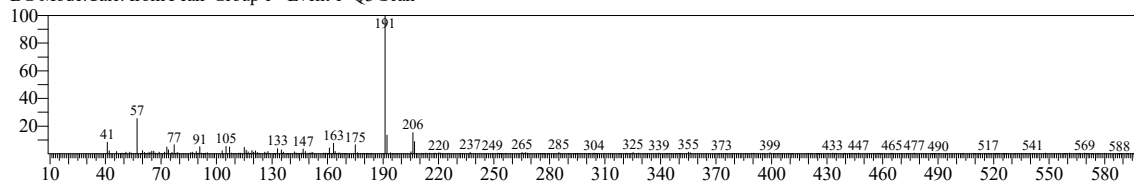

Hit#1 Entry:24088 Library:NIST20R.lib

SI:89 Formula:C14H22O CAS:96-76-4 MolWeight:206 RetIndex:1555

CompName:2,4-Di-tert-butylphenol \$\$ Phenol, 2,4-bis(1,1-dimethylethyl)- \$\$ Phenol, 2,4-di-tert-butyl- \$\$ 2,4-di-t-Butylphenol \$\$ 1-Hydroxy-2,4-di-tert-bu

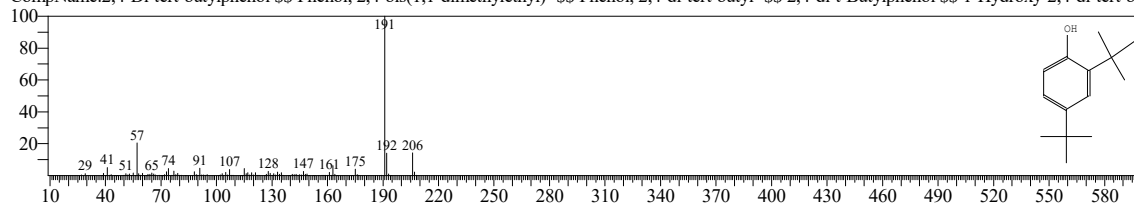

Hit#2 Entry:24098 Library:NIST20R.lib

SI:86 Formula:C14H22O CAS:5875-45-6 MolWeight:206 RetIndex:1555

CompName:Phenol, 2,5-bis(1,1-dimethylethyl)- \$\$ Phenol, 2,5-di-tert-butyl- \$\$ 2,5-Di-tert-butylphenol \$\$ 2,5-bis(1,1-Dimethylethyl)phenol

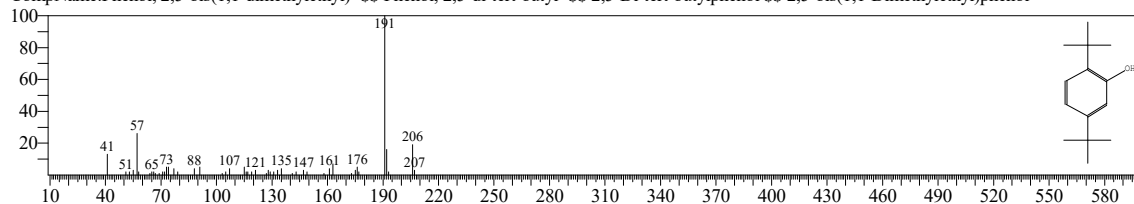

Hit#3 Entry:24110 Library:NIST20R.lib

SI:86 Formula:C14H22O CAS:1138-52-9 MolWeight:206 RetIndex:1555

CompName:Phenol, 3,5-bis(1,1-dimethylethyl)- \$\$ Phenol, 3,5-di-tert-butyl- \$\$ 3,5-Di-tert-butylphenol \$\$ Phenol, 3,5-bis(t-butyl) \$\$ 3,5-Di-t-butylphenol \$

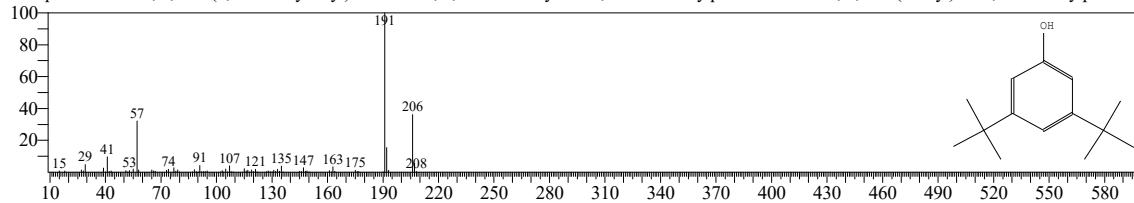

Hit#4 Entry:24081 Library:NIST20R.lib

SI:84 Formula:C14H22O CAS:128-39-2 MolWeight:206 RetIndex:1555

CompName:Phenol, 2,6-bis(1,1-dimethylethyl)- \$\$ Phenol, 2,6-di-tert-butyl- \$\$ 2,6-Bis(tert-butyl)phenol \$\$ 2,6-Bis(1,1-dimethylethyl)phenol \$\$ 2,6-Di-tert

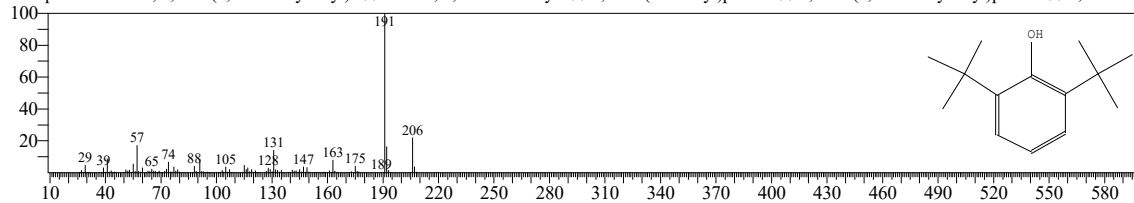

Hit#5 Entry:103047 Library:NIST20M1.lib

SI:82 Formula:C16H24O2 CAS:104316-22-5 MolWeight:248 RetIndex:1714

CompName:2,4-Di-tert-butylphenol, acetate

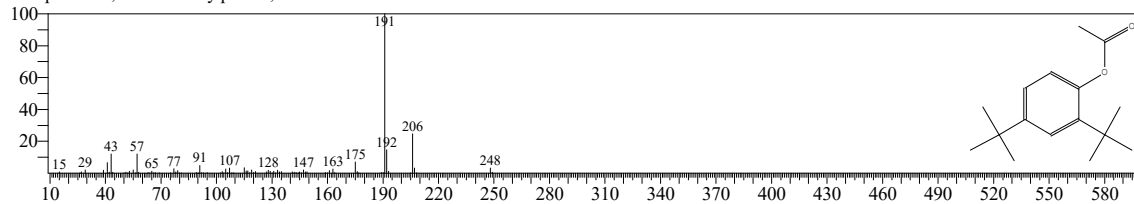

# TNAU

<< Target >>

Line#:4 R.Time:15.540(Scan#:2209) MassPeaks:307

RawMode:Averaged 15.535-15.545(2208-2210) BasePeak:43.00(467)

BG Mode:Calc. from Peak Group 1 - Event 1 Q3 Scan

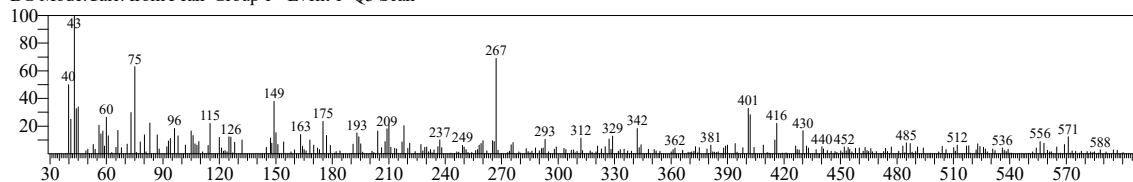

Hit#:1 Entry:511 Library:OA\_TMS\_DB5\_67min\_V3.lib

SI:37 Formula:C22H48O3Si2 CAS:506-13-8 MolWeight:416 RetIndex:2396

CompName:Juniperic acid-2TMS ; 16-hydroxyhexadecanoic acid

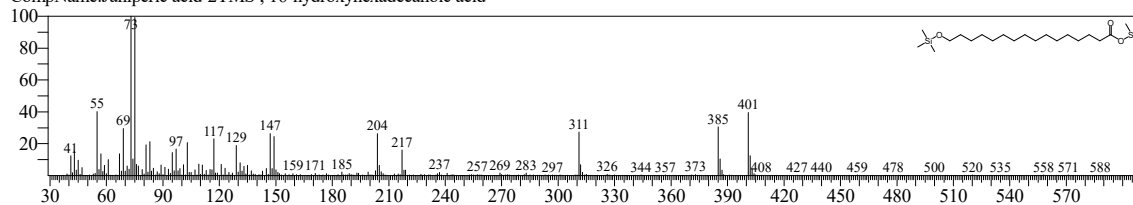

Hit#:2 Entry:163 Library:OA\_TMS\_DB5\_67min\_V3.lib

SI:36 Formula:C10H22O4SSi2 CAS:123-93-3 MolWeight:294 RetIndex:1537

CompName:Thiodiglycolic acid-2TMS ; 2-(carboxymethylsulfanyl)acetic acid

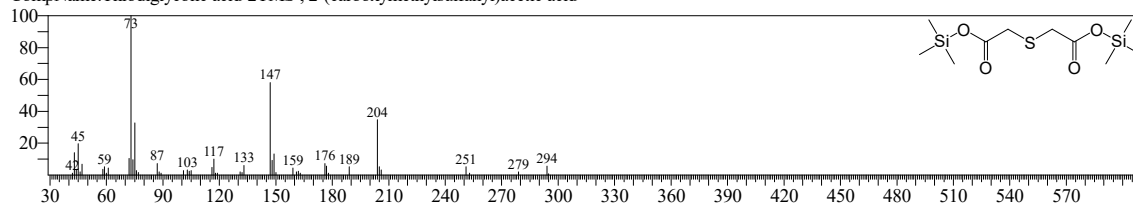

Hit#:3 Entry:52 Library:OA\_TMS\_DB5\_67min\_V3.lib

SI:36 Formula:C10H22O4Si2 CAS:516-05-2 MolWeight:262 RetIndex:1218

CompName:Methylmalonic acid-2TMS ; 2-methylpropanedioic acid

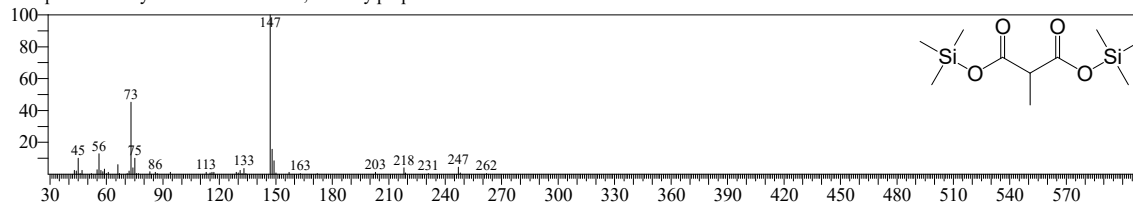

Hit#:4 Entry:477 Library:OA\_TMS\_DB5\_67min\_V3.lib

SI:36 Formula:C21H46OSi CAS:112-92-5 MolWeight:342 RetIndex:2156

CompName:Octadecanol-TMS ; octadecan-1-ol

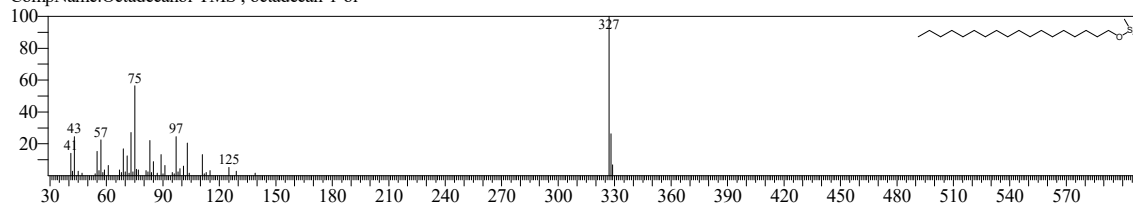

Hit#:5 Entry:150 Library:OA\_TMS\_DB5\_67min\_V3.lib

SI:35 Formula:C15H26O3Si2 CAS:515-30-0 MolWeight:310 RetIndex:1517

CompName:2-Phenyllactic acid-2TMS ; 2-hydroxy-3-phenylpropanoic acid

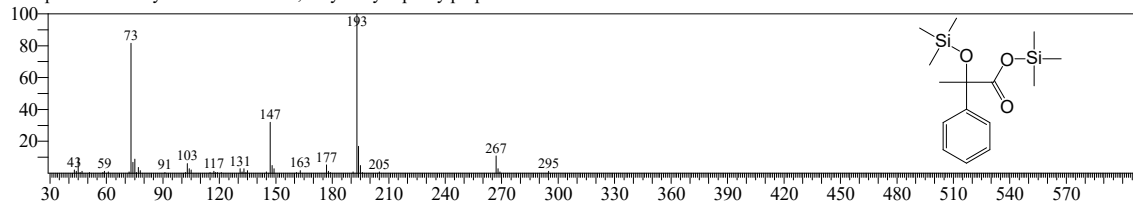

<< Target >>

Line#:5 R.Time:28.430(Scan#:4787) MassPeaks:338

RawMode:Averaged 28.425-28.435(4786-4788) BasePeak:283.00(1005)

BG Mode:Calc. from Peak Group 1 - Event 1 Q3 Scan

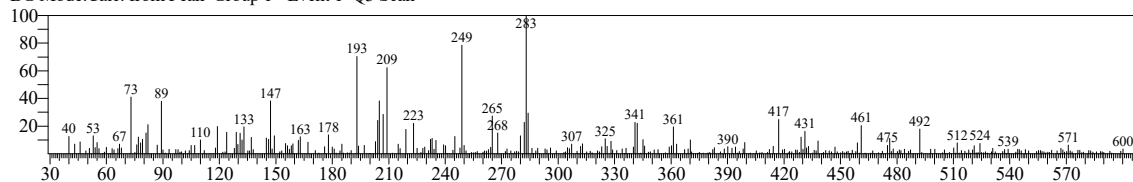

Hit#:1 Entry:308 Library:OA\_TMS\_DB5\_67min\_V3.lib

SI:33 Formula:C<sub>19</sub>H<sub>42</sub>O<sub>5</sub>Si<sub>4</sub> CAS:138-59-0 MolWeight:462 RetIndex:1819

CompName:Shikimic acid-4TMS ; 3,4,5-trihydroxycyclohexene-1-carboxylic acid

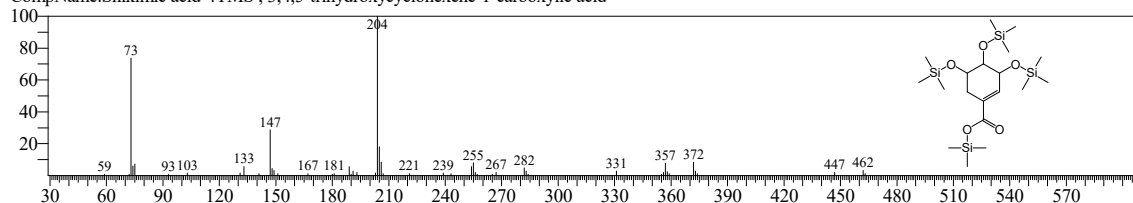

Hit#:2 Entry:61 Library:OA\_TMS\_DB5\_67min\_V3.lib

SI:32 Formula:C<sub>11</sub>H<sub>26</sub>O<sub>3</sub>Si<sub>2</sub> CAS:10237-77-1 MolWeight:262 RetIndex:1244

CompName:3-Hydroxyvaleric acid-2TMS ; 3-hydroxy-3-methylbutanoic acid

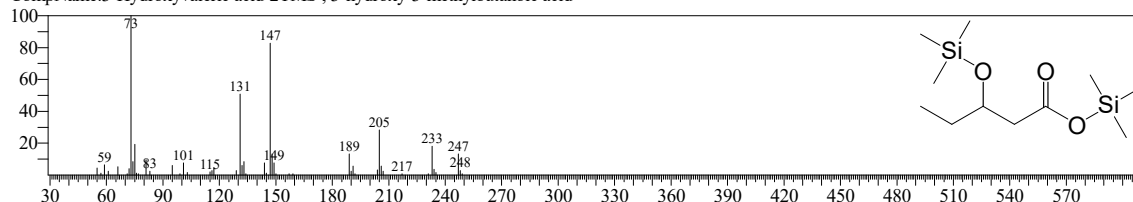

Hit#:3 Entry:311 Library:OA\_TMS\_DB5\_67min\_V3.lib

SI:32 Formula:C<sub>21</sub>H<sub>52</sub>O<sub>6</sub>Si<sub>5</sub> CAS:59-23-4 MolWeight:540 RetIndex:1824

CompName:Galactose-5TMS(1) ; (3R,4S,5R,6R)-6-(hydroxymethyl)oxane-2,3,4,5-tetrol

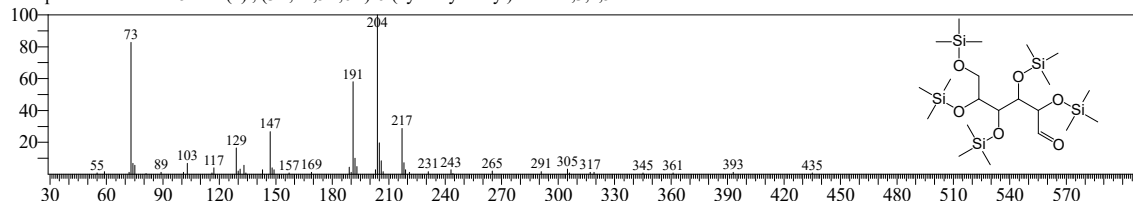

Hit#:4 Entry:418 Library:OA\_TMS\_DB5\_67min\_V3.lib

SI:32 Formula:C<sub>17</sub>H<sub>36</sub>N<sub>2</sub>O<sub>2</sub>Si<sub>3</sub> CAS:85-87-0 MolWeight:384 RetIndex:1964

CompName:Pyridoxamine-3TMS ; 4-(aminomethyl)-5-(hydroxymethyl)-2-methylpyridin-3-ol

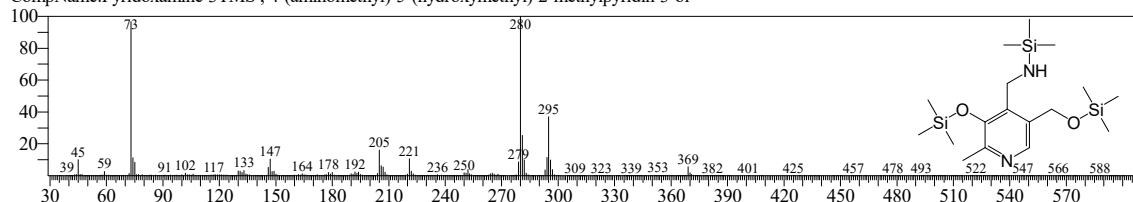

Hit#:5 Entry:539 Library:OA\_TMS\_DB5\_67min\_V3.lib

SI:31 Formula:C<sub>27</sub>H<sub>60</sub>O<sub>3</sub>Si<sub>2</sub> CAS:544-62-7 MolWeight:488 RetIndex:2684

CompName:Batyl alcohol-2TMS ; 3-octadecoxypropane-1,2-diol

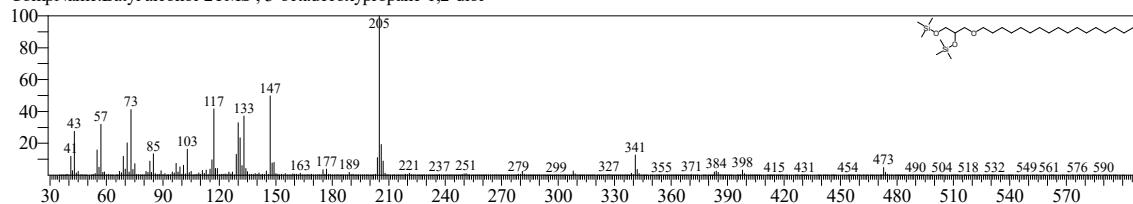

# TNAU

<< Target >>

Line#:6 R.Time:28.550(Scan#:4811) MassPeaks:325

RawMode:Averaged 28.545-28.555(4810-4812) BasePeak:208.00(515)

BG Mode:Calc. from Peak Group 1 - Event 1 Q3 Scan

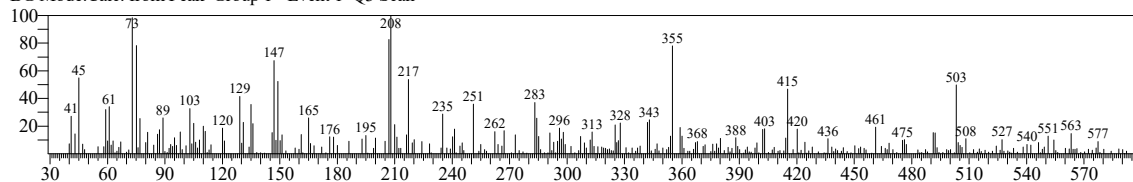

Hit#:1 Entry:511 Library:OA\_TMS\_DB5\_67min\_V3.lib

SI:39 Formula:C22H48O3Si2 CAS:506-13-8 MolWeight:416 RetIndex:2396

CompName:Juniperic acid-2TMS ; 16-hydroxyhexadecanoic acid

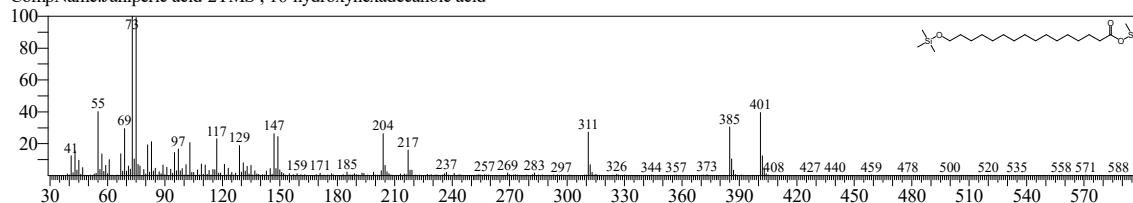

Hit#:2 Entry:455 Library:OA\_TMS\_DB5\_67min\_V3.lib

SI:38 Formula:C18H38O4Si2 CAS:693-23-2 MolWeight:374 RetIndex:2092

CompName:Dodecanedioic acid-2TMS ; dodecanedioic acid

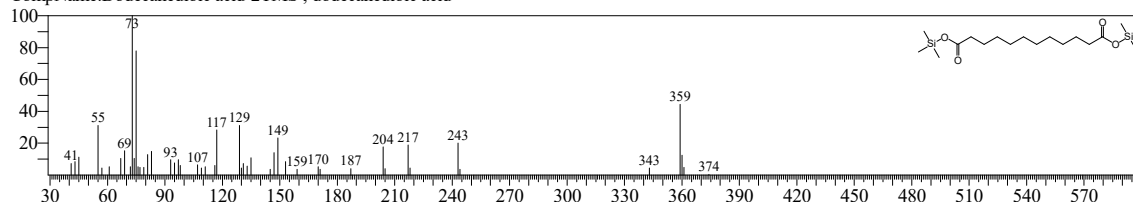

Hit#:3 Entry:548 Library:OA\_TMS\_DB5\_67min\_V3.lib

SI:37 Formula:C17H31N5O3SSi2 CAS:2457-80-9 MolWeight:441 RetIndex:2787

CompName:5'-Methylthioadenosine-2TMS ; (2R,3R,4S,5S)-2-(6-aminopurin-9-yl)-5-(methylsulfanylmethyl)oxolane-3,4-diol

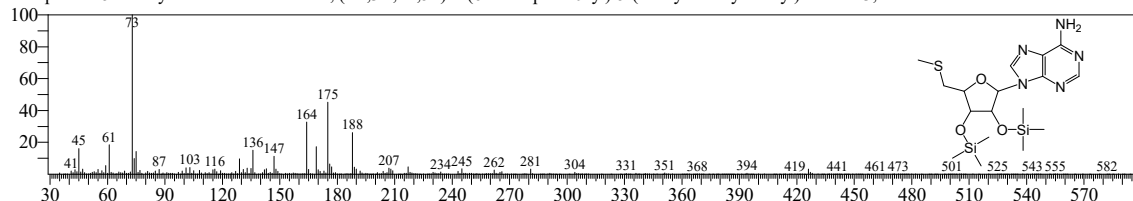

Hit#:4 Entry:77 Library:OA\_TMS\_DB5\_67min\_V3.lib

SI:36 Formula:C12H32O3Si3 CAS:56-81-5 MolWeight:308 RetIndex:1279

CompName:Glycerol-3TMS ; propane-1,2,3-triol

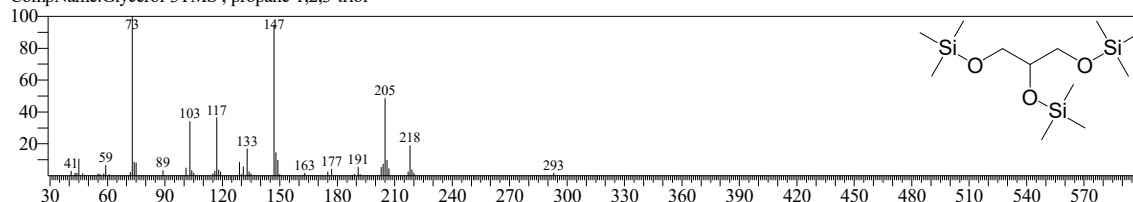

Hit#:5 Entry:156 Library:OA\_TMS\_DB5\_67min\_V3.lib

SI:36 Formula:C12H24O4Si2 CAS:4440-68-0 MolWeight:288 RetIndex:1522

CompName:2-Hexenedioic acid-2TMS ; hex-2-enedioic acid

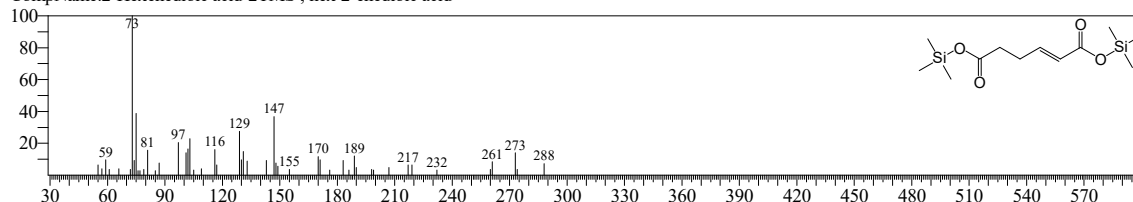

# TNAU

<< Target >>

Line#:7 R.Time:29.235(Scan#:4948) MassPeaks:322

RawMode:Averaged 29.230-29.240(4947-4949) BasePeak:281.00(828)

BG Mode:Calc. from Peak Group 1 - Event 1 Q3 Scan

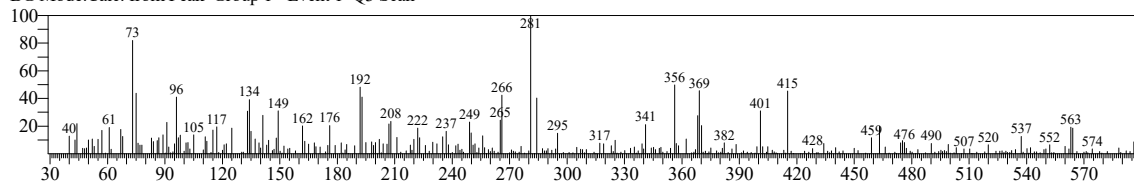

Hit#:1 Entry:328 Library:OA TMS DB5\_67min\_V3.lib

SI:41 Formula:C13H23NO2Si2 CAS:150-13-0 MolWeight:281 RetIndex:1845

CompName:4-Aminobenzoic acid-2TMS ; 4-aminobenzoic acid

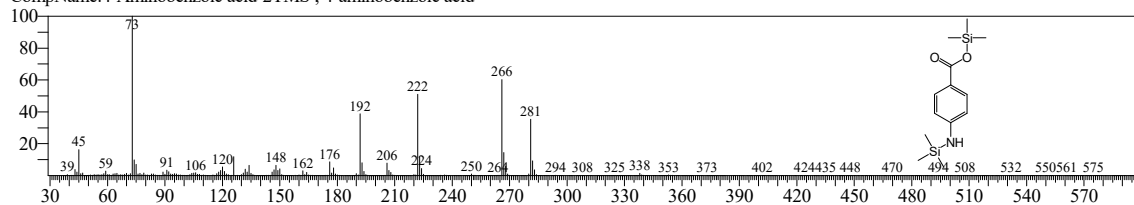

Hit#:2 Entry:203 Library:OA TMS DB5\_67min\_V3.lib

SI:36 Formula:C13H23NO2Si2 CAS:118-92-3 MolWeight:281 RetIndex:1623

CompName:Anthranilic acid-2TMS ; 2-aminobenzoic acid

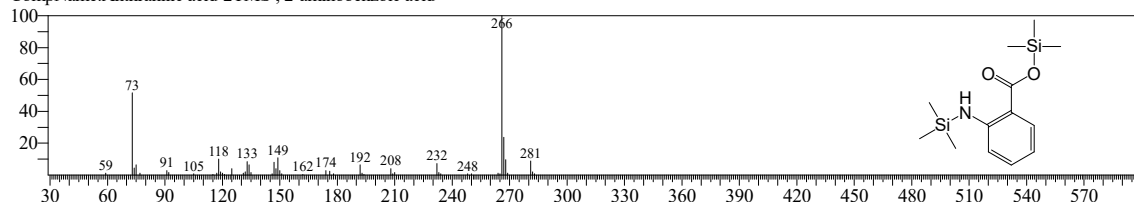

Hit#:3 Entry:343 Library:OA TMS DB5\_67min\_V3.lib

SI:32 Formula:C18H37NO3Si3 CAS:51-43-4 MolWeight:399 RetIndex:1868

CompName:Epinephrine-3TMS ; 4-[(1R)-1-hydroxy-2-(methylamino)ethyl]benzene-1,2-diol

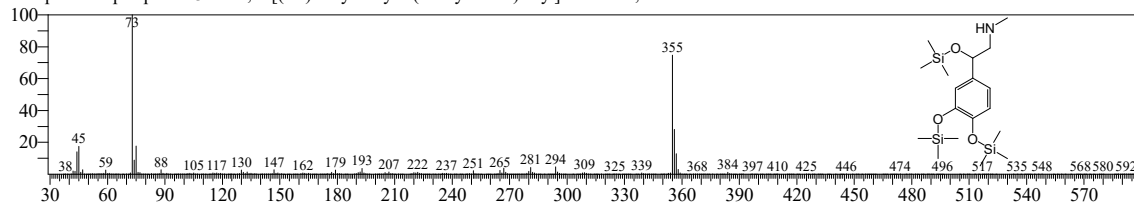

Hit#:4 Entry:384 Library:OA TMS DB5\_67min\_V3.lib

SI:32 Formula:C17H35NO3Si3 CAS:65-23-6 MolWeight:385 RetIndex:1919

CompName:Pyridoxine-3TMS ; 4,5-bis(hydroxymethyl)-2-methylpyridin-3-ol

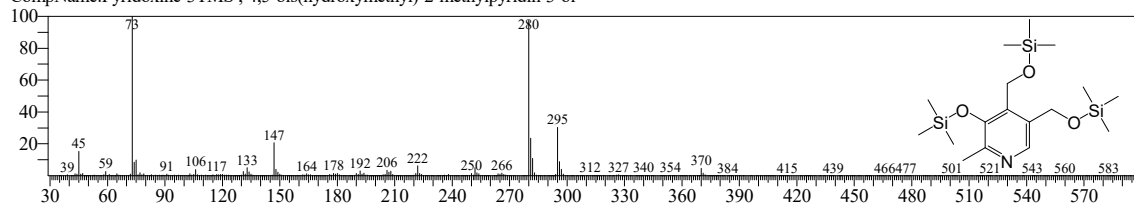

Hit#:5 Entry:368 Library:OA TMS DB5\_67min\_V3.lib

SI:31 Formula:C17H35NO2Si3 CAS:1196-92-5 MolWeight:369 RetIndex:1899

CompName:Vanillylamine-3TMS ; 4-(aminomethyl)-2-methoxyphenol

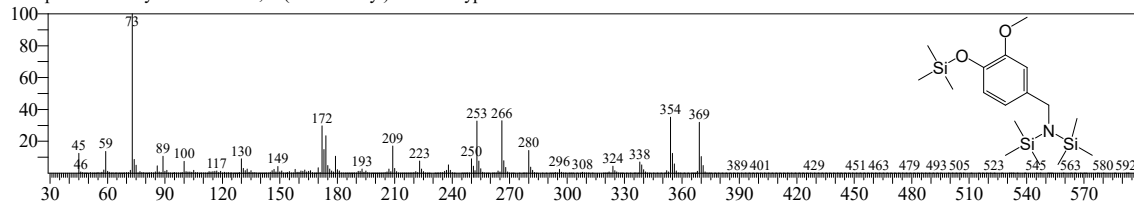



# TNAU

<< Target >>

Line#:8 R.Time:29.280(Scan#:4957) MassPeaks:306

RawMode:Averaged 29.275-29.285(4956-4958) BasePeak:191.05(1113)

BG Mode:Calc. from Peak Group 1 - Event 1 Q3 Scan

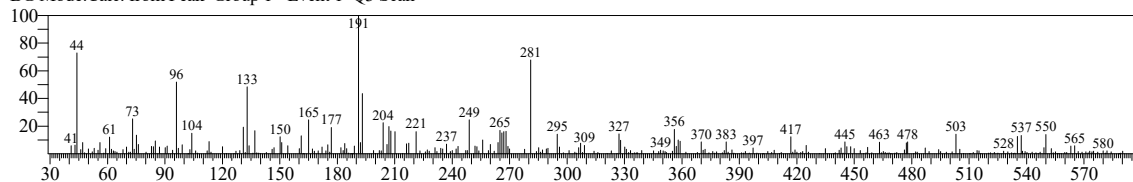

Hit#:1 Entry:343 Library:OA TMS DB5\_67min\_V3.lib

SI:35 Formula:C18H37NO3Si3 CAS:51-43-4 MolWeight:399 RetIndex:1868

CompName:Epinephrine-3TMS ; 4-[(1R)-1-hydroxy-2-(methylamino)ethyl]benzene-1,2-diol

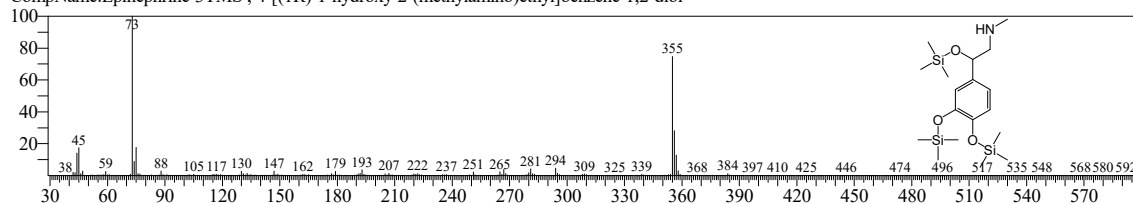

Hit#:2 Entry:310 Library:OA TMS DB5\_67min\_V3.lib

SI:34 Formula:C11H20N4OSi2 CAS:68-94-0 MolWeight:280 RetIndex:1822

CompName:Hypoxanthine-2TMS ; 3,7-dihydropurin-6-one

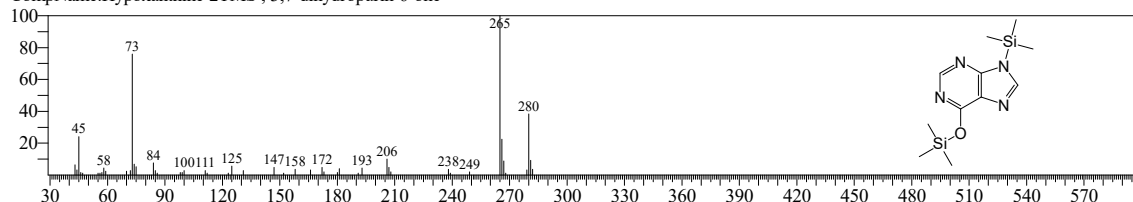

Hit#:3 Entry:211 Library:OA TMS DB5\_67min\_V3.lib

SI:34 Formula:C13H22O3Si2 CAS:99-96-7 MolWeight:282 RetIndex:1636

CompName:4-Hydroxybenzoic acid-2TMS ; 4-hydroxybenzoic acid

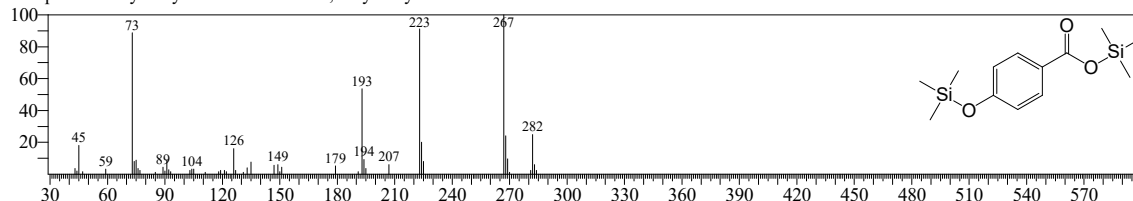

Hit#:4 Entry:150 Library:OA TMS DB5\_67min\_V3.lib

SI:34 Formula:C15H26O3Si2 CAS:515-30-0 MolWeight:310 RetIndex:1517

CompName:2-Phenyllactic acid-2TMS ; 2-hydroxy-3-phenylpropanoic acid

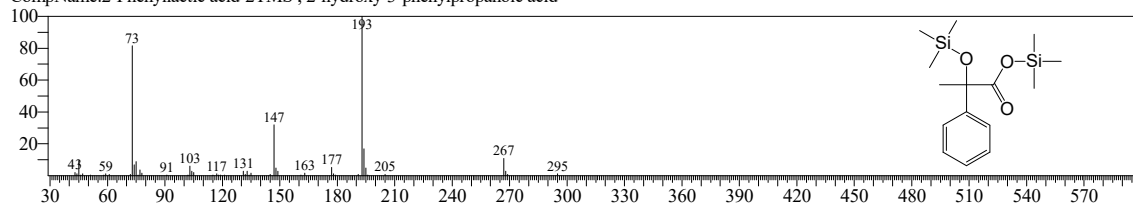

Hit#:5 Entry:328 Library:OA TMS DB5\_67min\_V3.lib

SI:33 Formula:C13H23NO2Si2 CAS:150-13-0 MolWeight:281 RetIndex:1845

CompName:4-Aminobenzoic acid-2TMS ; 4-aminobenzoic acid

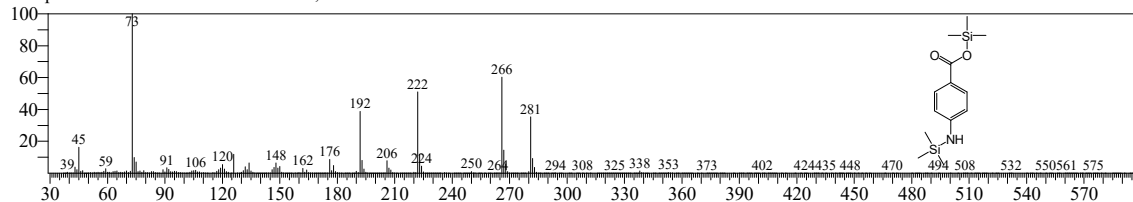

# TNAU

<< Target >>

Line#9 R.Time:29.535(Scan#:5008) MassPeaks:305

RawMode:Averaged 29.530-29.540(5007-5009) BasePeak:207.05(1737)

BG Mode:Calc. from Peak Group 1 - Event 1 Q3 Scan

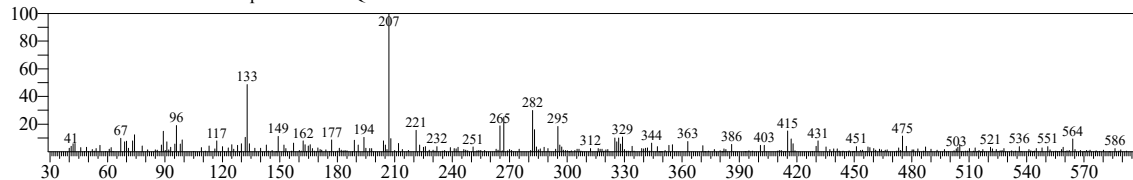

Hit#1 Entry:179 Library:OA\_TMS\_DB5\_67min\_V3.lib

SI:36 Formula:C13H22O3Si2 CAS:99-06-9 MolWeight:282 RetIndex:1572

CompName:3-Hydroxybenzoic acid-2TMS ; 3-hydroxybenzoic acid

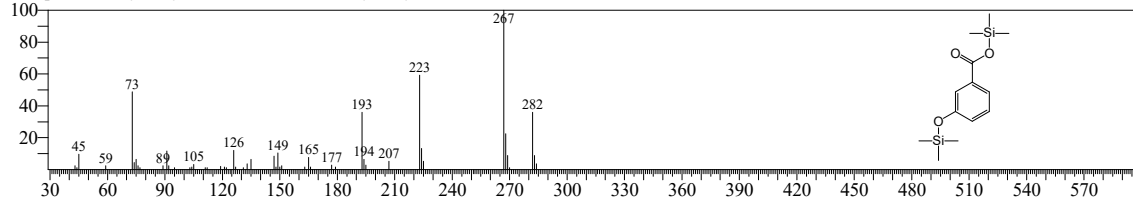

Hit#2 Entry:294 Library:OA\_TMS\_DB5\_67min\_V3.lib

SI:33 Formula:C15H26O4Si2 CAS:306-08-1 MolWeight:326 RetIndex:1782

CompName:Homovanillic acid-2TMS ; 2-(4-hydroxy-3-methoxyphenyl)acetic acid

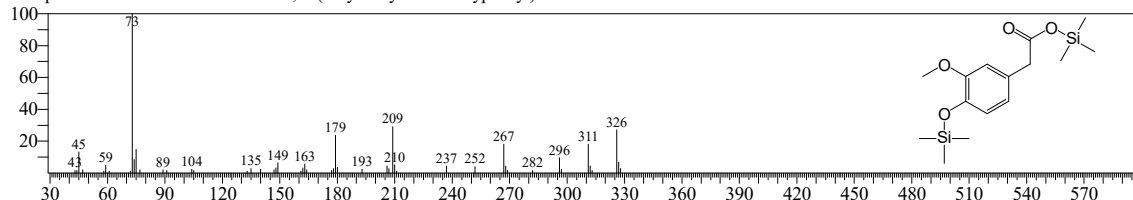

Hit#3 Entry:211 Library:OA\_TMS\_DB5\_67min\_V3.lib

SI:32 Formula:C13H22O3Si2 CAS:99-96-7 MolWeight:282 RetIndex:1636

CompName:4-Hydroxybenzoic acid-2TMS ; 4-hydroxybenzoic acid

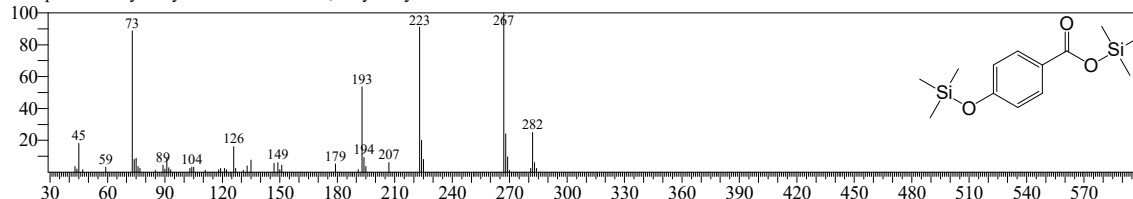

Hit#4 Entry:308 Library:OA\_TMS\_DB5\_67min\_V3.lib

SI:31 Formula:C19H42O5Si4 CAS:138-59-0 MolWeight:462 RetIndex:1819

CompName:Shikimic acid-4TMS ; 3,4,5-trihydroxycyclohexene-1-carboxylic acid

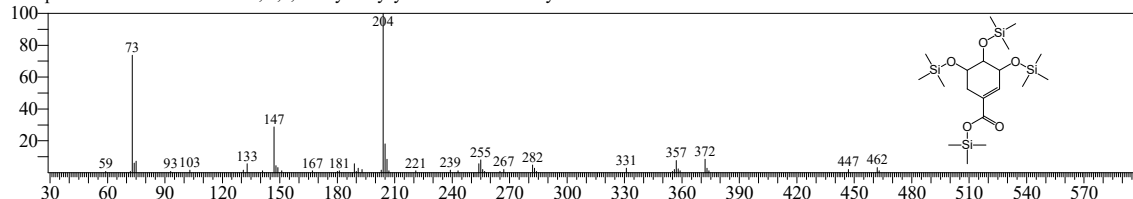

Hit#5 Entry:384 Library:OA\_TMS\_DB5\_67min\_V3.lib

SI:30 Formula:C17H35NO3Si3 CAS:65-23-6 MolWeight:385 RetIndex:1919

CompName:Pyridoxine-3TMS ; 4,5-bis(hydroxymethyl)-2-methylpyridin-3-ol

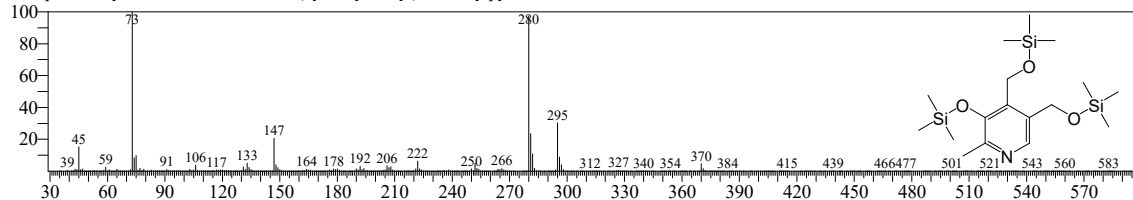

# TNAU

<< Target >>

Line#:10 R.Time:29.575(Scan#:5016) MassPeaks:300

RawMode:Averaged 29.570-29.580(5015-5017) BasePeak:207.00(781)

BG Mode:Calc. from Peak Group 1 - Event 1 Q3 Scan

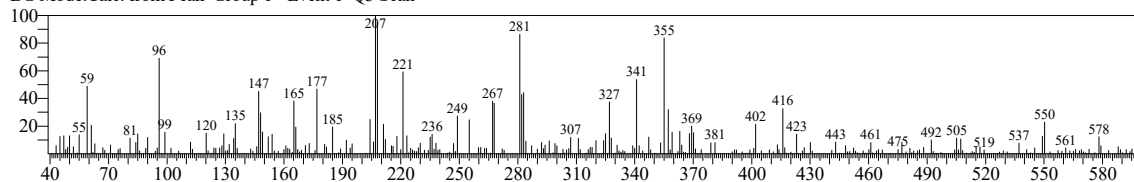

Hit#:1 Entry:402 Library:OA\_TMS\_DB5\_67min\_V3.lib

SI:31 Formula:C20H42O4Si4 CAS:775-01-9 MolWeight:458 RetIndex:1942

CompName:3,4-Dihydroxymandelic acid-4TMS ; 2-(3,4-dihydroxyphenyl)-2-hydroxyacetic acid

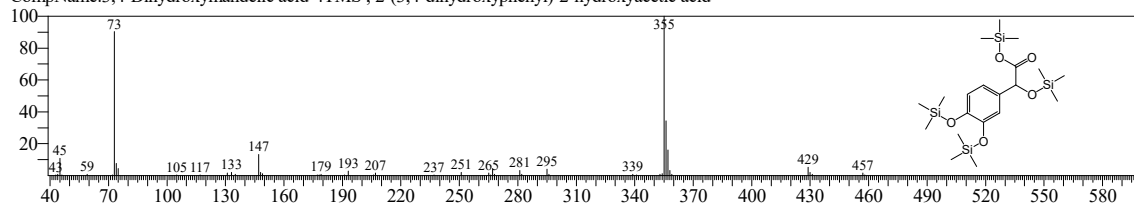

Hit#:2 Entry:179 Library:OA\_TMS\_DB5\_67min\_V3.lib

SI:29 Formula:C13H22O3Si2 CAS:99-06-9 MolWeight:282 RetIndex:1572

CompName:3-Hydroxybenzoic acid-2TMS ; 3-hydroxybenzoic acid

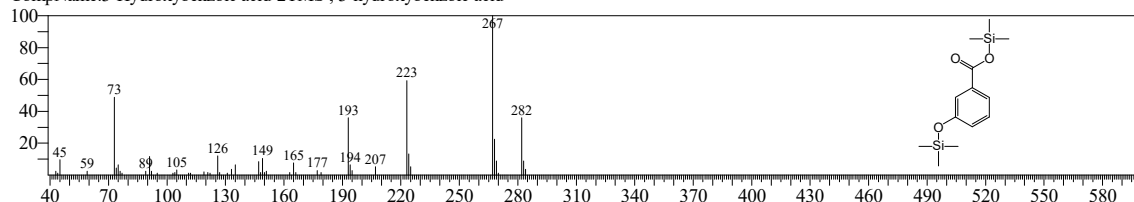

Hit#:3 Entry:211 Library:OA\_TMS\_DB5\_67min\_V3.lib

SI:27 Formula:C13H22O3Si2 CAS:99-96-7 MolWeight:282 RetIndex:1636

CompName:4-Hydroxybenzoic acid-2TMS ; 4-hydroxybenzoic acid

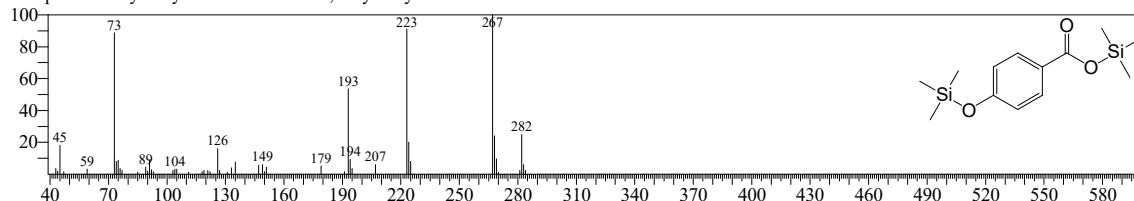

Hit#:4 Entry:308 Library:OA\_TMS\_DB5\_67min\_V3.lib

SI:25 Formula:C19H42O5Si4 CAS:138-59-0 MolWeight:462 RetIndex:1819

CompName:Shikimic acid-4TMS ; 3,4,5-trihydroxycyclohexene-1-carboxylic acid

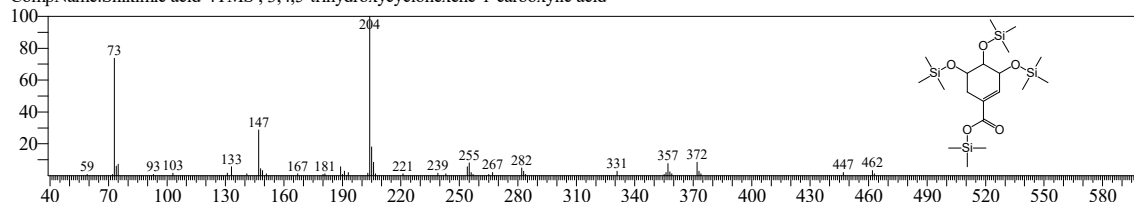

Hit#:5 Entry:341 Library:OA\_TMS\_DB5\_67min\_V3.lib

SI:24 Formula:C18H34O4Si3 CAS:3247-75-4 MolWeight:398 RetIndex:1864

CompName:3-(3-Hydroxyphenyl)-3-hydroxypropionic acid-3TMS ; 3-hydroxy-3-(3-hydroxyphenyl)propanoic acid

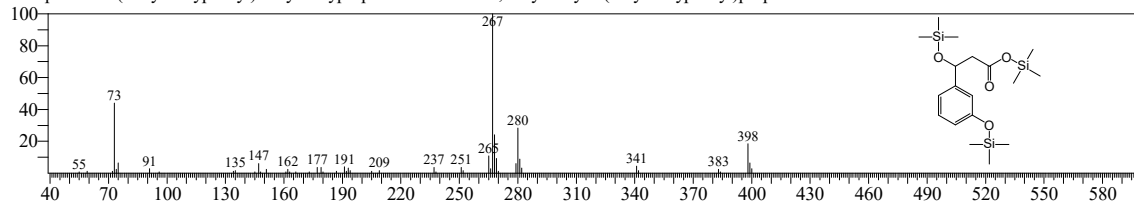

# TNAU

<< Target >>

Line#:11 R.Time:29.900(Scan#:5081) MassPeaks:277

RawMode:Averaged 29.895-29.905(5080-5082) BasePeak:281.05(1094)

BG Mode:Calc. from Peak Group 1 - Event 1 Q3 Scan

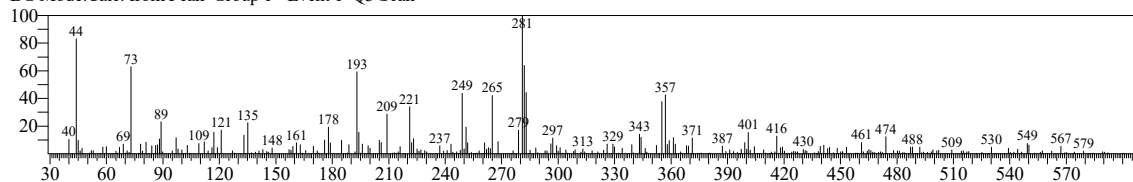

Hit#:1 Entry:315 Library:OA\_TMS\_DB5\_67min\_V3.lib

SI:42 Formula:C16H30O4Si3 CAS:99-50-3 MolWeight:370 RetIndex:1833

CompName:Protocatechuic acid-3TMS ; 3,4-dihydroxybenzoic acid

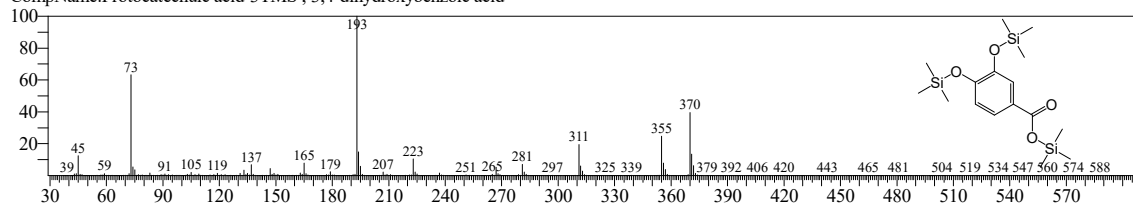

Hit#:2 Entry:343 Library:OA\_TMS\_DB5\_67min\_V3.lib

SI:41 Formula:C18H37NO3Si3 CAS:51-43-4 MolWeight:399 RetIndex:1868

CompName:Epinephrine-3TMS ; 4-[(1R)-1-hydroxy-2-(methylamino)ethyl]benzene-1,2-diol

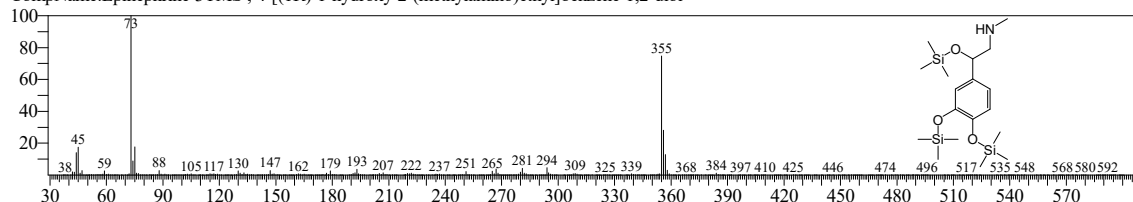

Hit#:3 Entry:402 Library:OA\_TMS\_DB5\_67min\_V3.lib

SI:40 Formula:C20H42O4Si4 CAS:775-01-9 MolWeight:458 RetIndex:1942

CompName:3,4-Dihydroxymandelic acid-4TMS ; 2-(3,4-dihydroxyphenyl)-2-hydroxyacetic acid

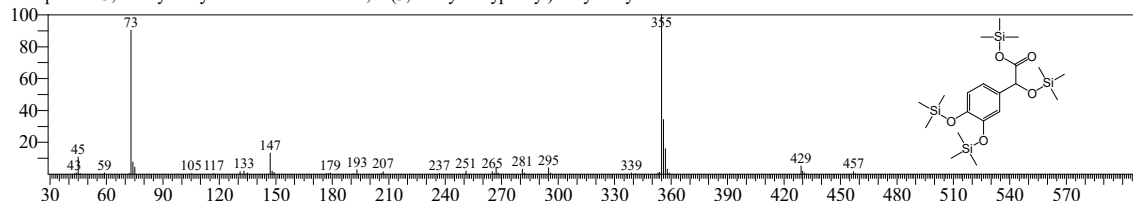

Hit#:4 Entry:328 Library:OA\_TMS\_DB5\_67min\_V3.lib

SI:38 Formula:C13H23NO2Si2 CAS:150-13-0 MolWeight:281 RetIndex:1845

CompName:4-Aminobenzoic acid-2TMS ; 4-aminobenzoic acid

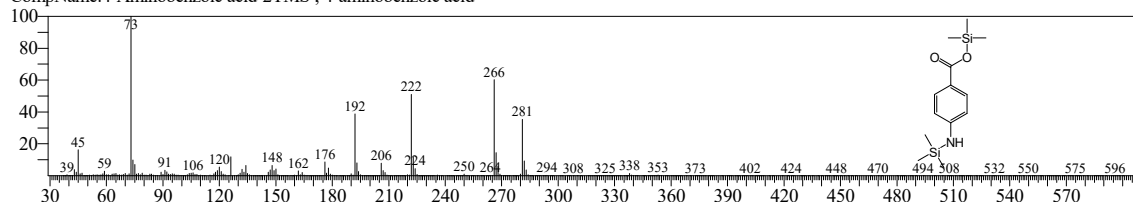

Hit#:5 Entry:359 Library:OA\_TMS\_DB5\_67min\_V3.lib

SI:36 Formula:C18H34O5Si3 CAS:55-10-7 MolWeight:414 RetIndex:1894

CompName:Vanilmandelic acid-3TMS ; 2-hydroxy-2-(4-hydroxy-3-methoxyphenyl)acetic acid

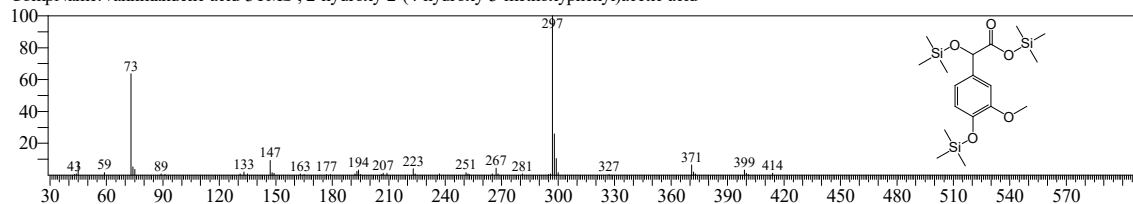

# TNAU

<< Target >>

Line#:12 R.Time:30.215(Scan#:5144) MassPeaks:303

RawMode:Averaged 30.210-30.220(5143-5145) BasePeak:207.05(841)

BG Mode:Calc. from Peak Group 1 - Event 1 Q3 Scan

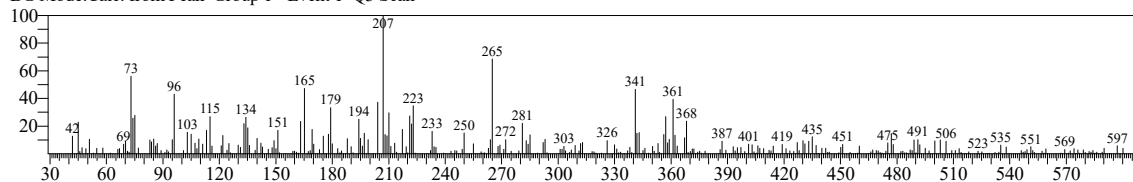

Hit#:1 Entry:561 Library:OA\_TMS\_DB5\_67min\_V3.lib

SI:34 Formula:C37H89NO11Si8 CAS:499-40-1 MolWeight:947 RetIndex:2983

CompName:Isomaltose-meto-8TMS(2) ; (3R,4S,5S,6R)-6-[[[(2S,3R,4S,5S,6R)-3,4,5-trihydroxy-6-(hydroxymethyl)oxan-2-yl]oxymethyl]oxane-2,3,

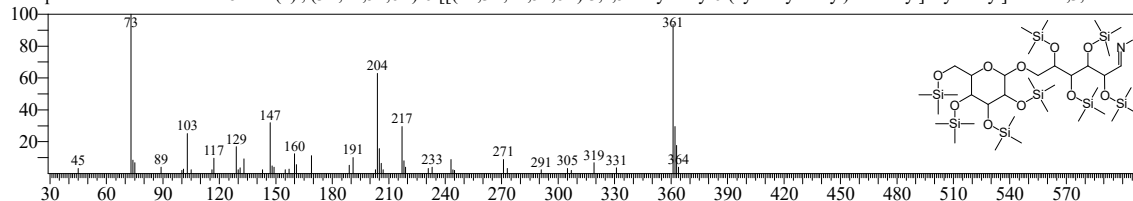

Hit#:2 Entry:3 Library:OA\_TMS\_DB5\_67min\_V3.lib

SI:32 Formula:C9H27BO3Si3 CAS:10043-35-3 MolWeight:278 RetIndex:992

CompName:Boric acid-3TMS ; boric acid

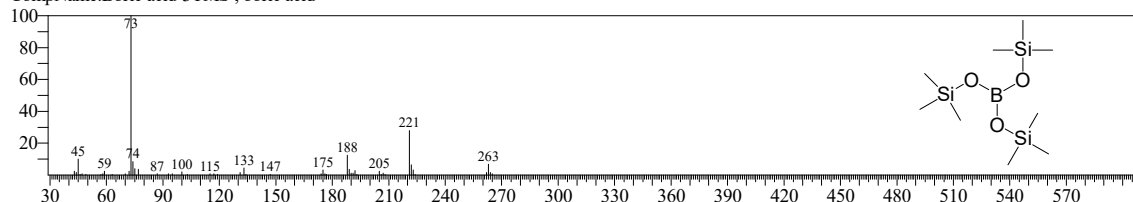

Hit#:3 Entry:384 Library:OA\_TMS\_DB5\_67min\_V3.lib

SI:32 Formula:C17H35NO3Si3 CAS:65-23-6 MolWeight:385 RetIndex:1919

CompName:Pyridoxine-3TMS ; 4,5-bis(hydroxymethyl)-2-methylpyridin-3-ol

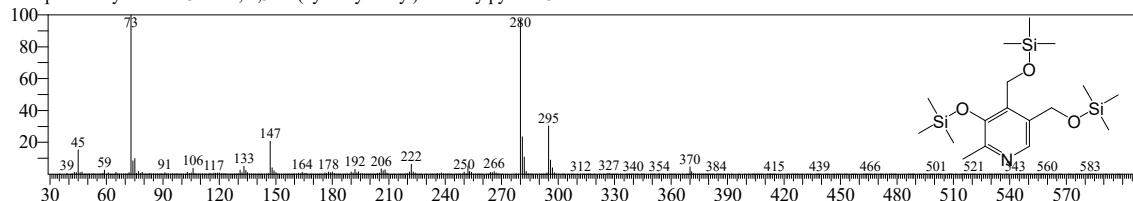

Hit#:4 Entry:267 Library:OA\_TMS\_DB5\_67min\_V3.lib

SI:31 Formula:C17H42O5Si4 CAS:58-86-6 MolWeight:438 RetIndex:1732

CompName:Xylose-4TMS(1) ; (2R,3S,4R)-2,3,4,5-tetrahydroxypentanal

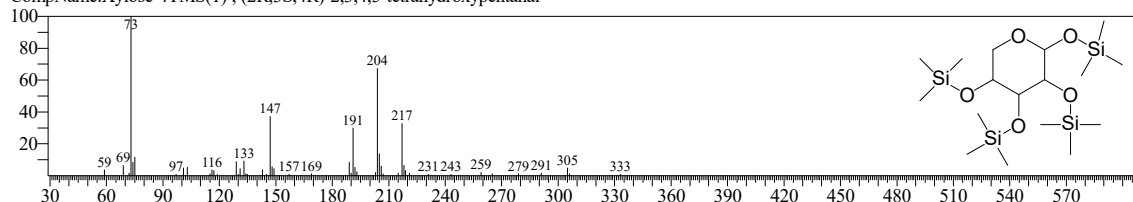

Hit#:5 Entry:382 Library:OA\_TMS\_DB5\_67min\_V3.lib

SI:31 Formula:C18H34O4Si3 CAS:6482-98-0 MolWeight:398 RetIndex:1918

CompName:4-Hydroxyphenyllactic acid-3TMS ; 2-hydroxy-3-(4-hydroxyphenyl)propanoate

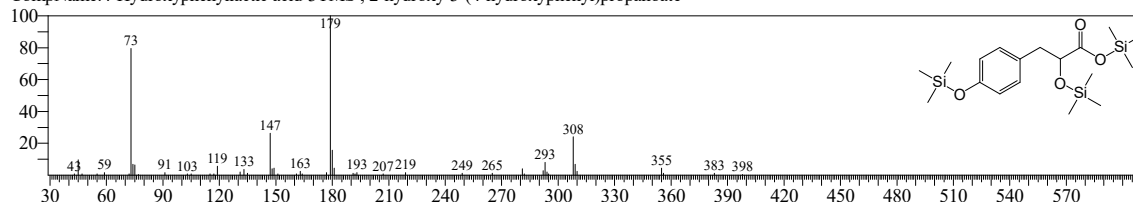

# TNAU

<< Target >>

Line#:13 R.Time:30.860(Scan#:5273) MassPeaks:310

RawMode:Averaged 30.855-30.865(5272-5274) BasePeak:207.05(1965)

BG Mode:Calc. from Peak Group 1 - Event 1 Q3 Scan

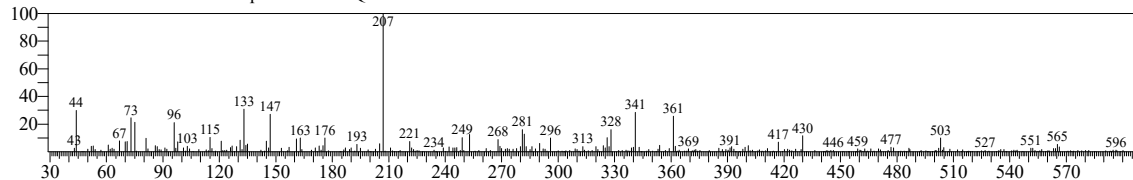

Hit#:1 Entry:10 Library:OA\_TMS\_DB5\_67min\_V3.lib

SI:40 Formula:C10H24O3Si2 CAS:594-61-6 MolWeight:248 RetIndex:1067

CompName:2-Hydroxyisobutyric acid-2TMS ; 2-hydroxy-2-methylpropanoic acid

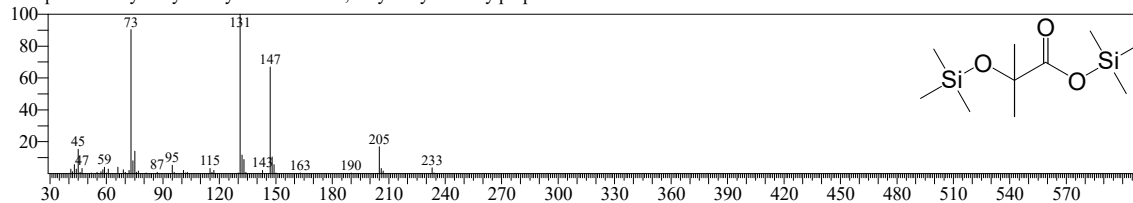

Hit#:2 Entry:539 Library:OA\_TMS\_DB5\_67min\_V3.lib

SI:38 Formula:C27H60O3Si2 CAS:544-62-7 MolWeight:488 RetIndex:2684

CompName:Batyl alcohol-2TMS ; 3-octadecoxypropane-1,2-diol

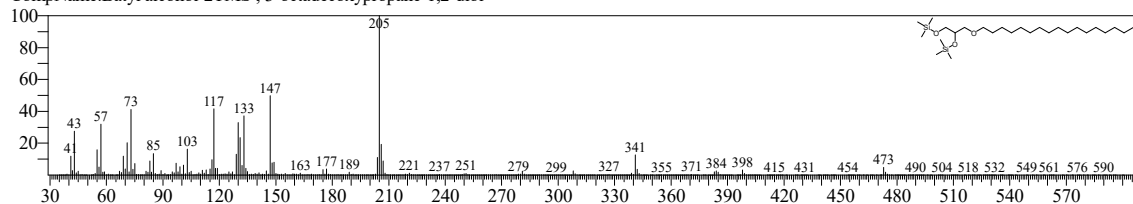

Hit#:3 Entry:13 Library:OA\_TMS\_DB5\_67min\_V3.lib

SI:37 Formula:C8H20O3Si2 CAS:79-14-1 MolWeight:220 RetIndex:1074

CompName:Glycolic acid-2TMS ; 2-hydroxyacetic acid

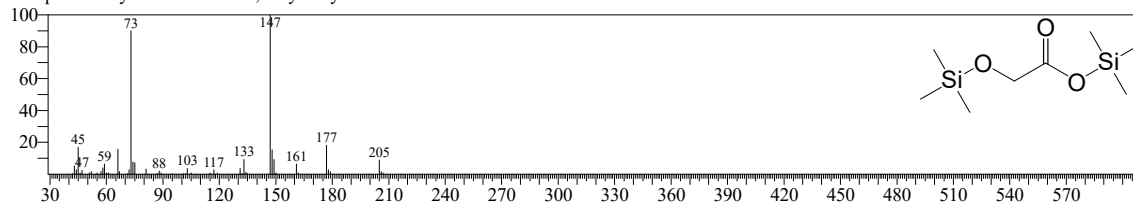

Hit#:4 Entry:61 Library:OA\_TMS\_DB5\_67min\_V3.lib

SI:37 Formula:C11H26O3Si2 CAS:10237-77-1 MolWeight:262 RetIndex:1244

CompName:3-Hydroxyvaleric acid-2TMS ; 3-hydroxy-3-methylbutanoic acid

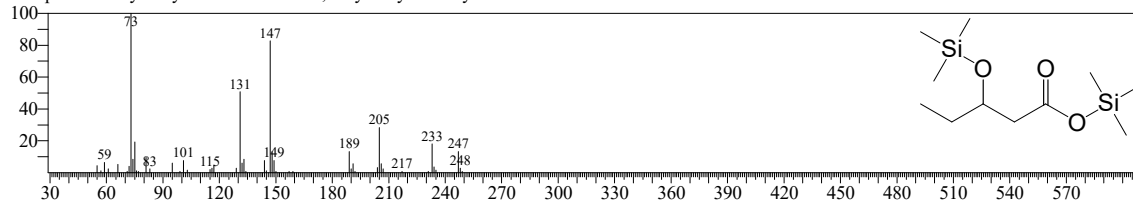

Hit#:5 Entry:184 Library:OA\_TMS\_DB5\_67min\_V3.lib

SI:36 Formula:C14H24O3Si2 CAS:614-75-5 MolWeight:296 RetIndex:1579

CompName:2-Hydroxyphenylacetic acid-2TMS ; 2-(2-hydroxyphenyl)acetic acid

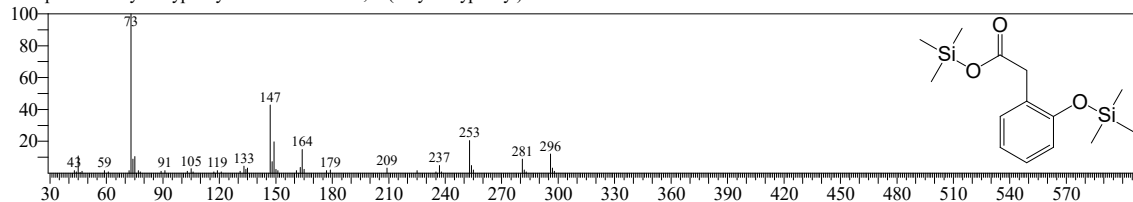

# TNAU

<< Target >>

Line#:14 R.Time:31.045(Scan#:5310) MassPeaks:292

RawMode:Averaged 31.040-31.050(5309-5311) BasePeak:281.05(1148)

BG Mode:Calc. from Peak Group 1 - Event 1 Q3 Scan

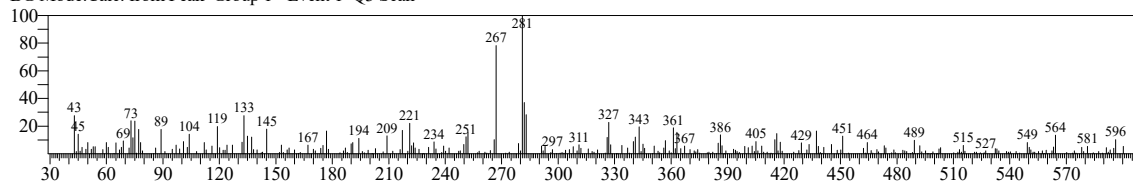

Hit#:1 Entry:211 Library:OA\_TMS\_DB5\_67min\_V3.lib

SI:39 Formula:C<sub>13</sub>H<sub>22</sub>O<sub>3</sub>Si<sub>2</sub> CAS:99-96-7 MolWeight:282 RetIndex:1636

CompName:4-Hydroxybenzoic acid-2TMS ; 4-hydroxybenzoic acid

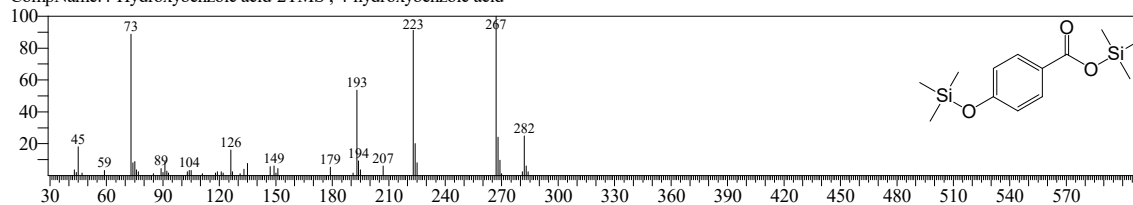

Hit#:2 Entry:328 Library:OA\_TMS\_DB5\_67min\_V3.lib

SI:38 Formula:C<sub>13</sub>H<sub>23</sub>NO<sub>2</sub>Si<sub>2</sub> CAS:150-13-0 MolWeight:281 RetIndex:1845

CompName:4-Aminobenzoic acid-2TMS ; 4-aminobenzoic acid

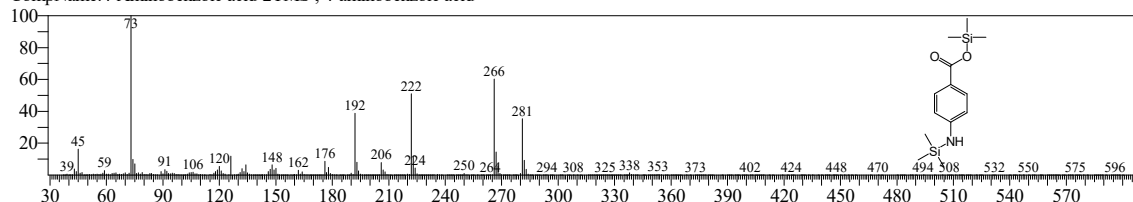

Hit#:3 Entry:438 Library:OA\_TMS\_DB5\_67min\_V3.lib

SI:37 Formula:C<sub>12</sub>H<sub>22</sub>N<sub>2</sub>O<sub>2</sub>Si<sub>2</sub> CAS:104-98-3 MolWeight:282 RetIndex:2014

CompName:Urocanic acid-2TMS ; (E)-3-(1H-imidazol-5-yl)prop-2-enoic acid

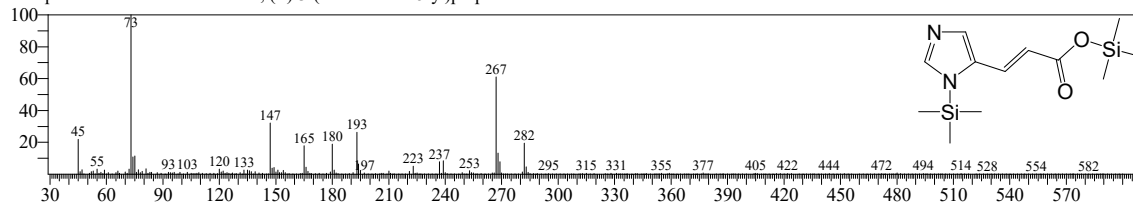

Hit#:4 Entry:179 Library:OA\_TMS\_DB5\_67min\_V3.lib

SI:37 Formula:C<sub>13</sub>H<sub>22</sub>O<sub>3</sub>Si<sub>2</sub> CAS:99-06-9 MolWeight:282 RetIndex:1572

CompName:3-Hydroxybenzoic acid-2TMS ; 3-hydroxybenzoic acid

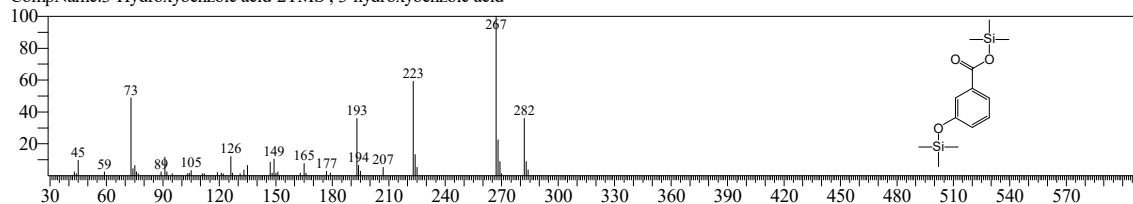

Hit#:5 Entry:341 Library:OA\_TMS\_DB5\_67min\_V3.lib

SI:35 Formula:C<sub>18</sub>H<sub>34</sub>O<sub>4</sub>Si<sub>3</sub> CAS:3247-75-4 MolWeight:398 RetIndex:1864

CompName:3-(3-Hydroxyphenyl)-3-hydroxypropionic acid-3TMS ; 3-hydroxy-3-(3-hydroxyphenyl)propanoic acid

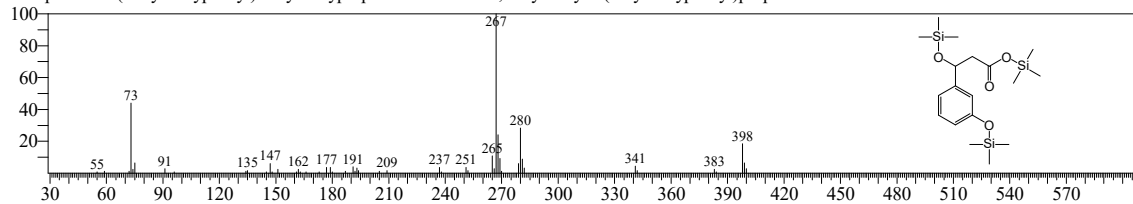

# TNAU

<< Target >>

Line#:15 R.Time:31.910(Scan#:5483) MassPeaks:312

RawMode:Averaged 31.905-31.915(5482-5484) BasePeak:139.10(2546)

BG Mode:Calc. from Peak Group 1 - Event 1 Q3 Scan

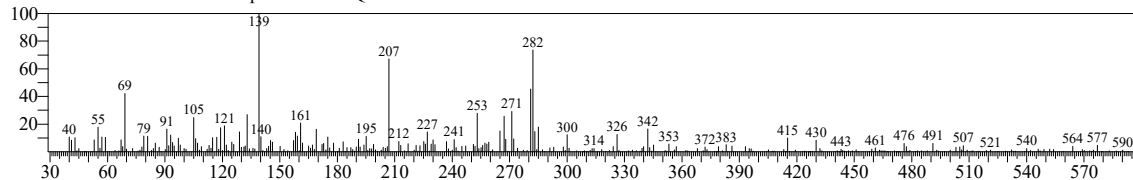

Hit#:1 Entry:38 Library:FA\_ME\_SP2560\_EI\_V3.lib

SI:36 Formula:C23H34O2 CAS:6217-54-5 MolWeight:342 RetIndex:3514

CompName:Methyl cis-4,7,10,13,16,19-Docosahexaenoate ; Docosa-4,7,10,13,16,19-hexaenoic acid

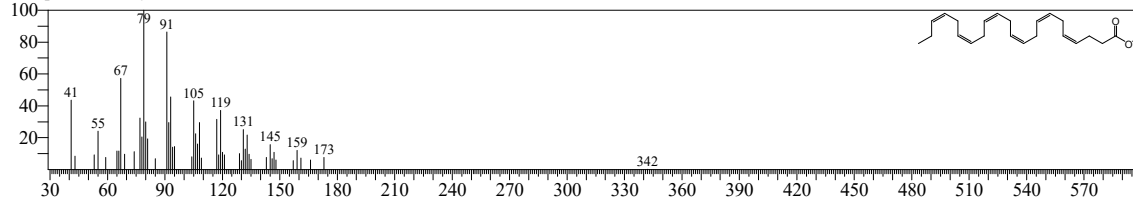

Hit#:2 Entry:36 Library:FA\_ME\_SP2560\_EI\_V3.lib

SI:36 Formula:C21H32O2 CAS:10417-94-4 MolWeight:316 RetIndex:3232

CompName:Methyl cis-5,8,11,14,17-Eicosapentaenoate ; Icosa-5,8,11,14,17-pentaenoic acid

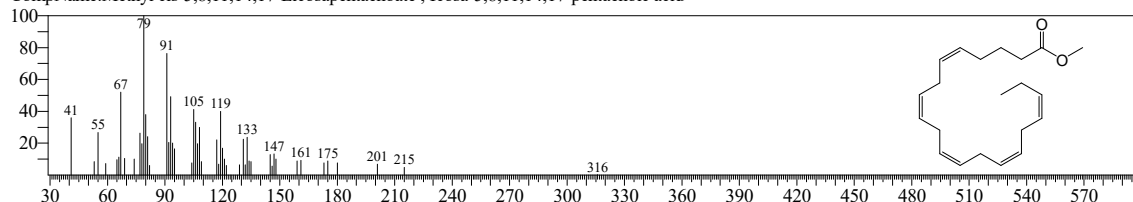

Hit#:3 Entry:33 Library:FA\_ME\_SP2560\_EI\_V3.lib

SI:35 Formula:C21H34O2 CAS:506-32-1 MolWeight:318 RetIndex:3109

CompName:Methyl arachidonate ; (5Z,8Z,11Z,14Z)-icosa-5,8,11,14-tetraenoic acid

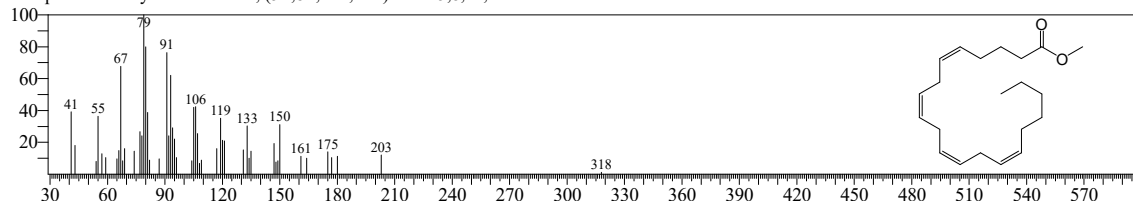

Hit#:4 Entry:534 Library:OA\_TMS\_DB5\_67min\_V3.lib

SI:34 Formula:C25H42O2Si CAS:24880-45-3 MolWeight:402 RetIndex:2591

CompName:Docosapentaenoic acid-TMS ; (7Z,10Z,13Z,16Z,19Z)-docosa-7,10,13,16,19-pentaenoic acid

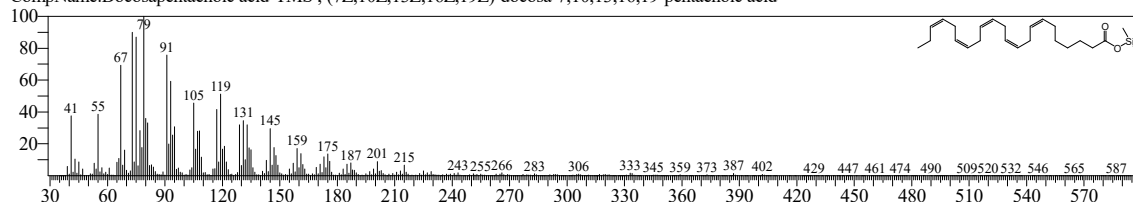

Hit#:5 Entry:23 Library:FA\_ME\_SP2560\_EI\_V3.lib

SI:33 Formula:C19H32O2 CAS:506-26-3 MolWeight:292 RetIndex:2852

CompName:Methyl gamma-linolenate ; Octadeca-6,9,12-trienoic acid

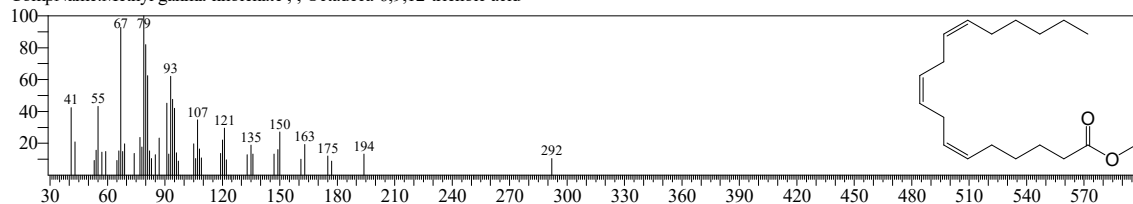



# TNAU

<< Target >>

Line#:16 R.Time:31.980(Scan#:5497) MassPeaks:271

RawMode:Averaged 31.975-31.985(5496-5498) BasePeak:281.05(1181)

BG Mode:Calc. from Peak Group 1 - Event 1 Q3 Scan

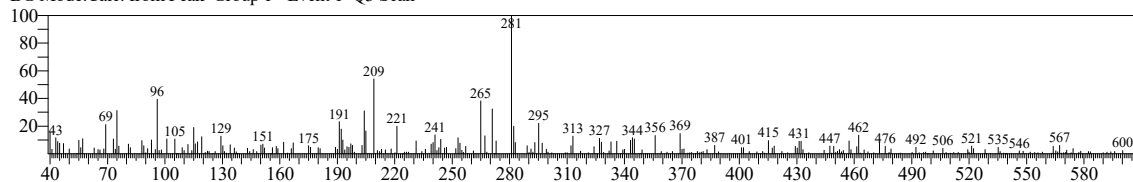

Hit#:1 Entry:386 Library:OA\_TMS\_DB5\_67min\_V3.lib

SI:33 Formula:C<sub>21</sub>H<sub>52</sub>O<sub>6</sub>Si<sub>5</sub> CAS:50-99-7 MolWeight:540 RetIndex:1922

CompName:Glucose-5TMS(1) ; (3R,4S,5S,6R)-6-(hydroxymethyl)oxane-2,3,4,5-tetrol

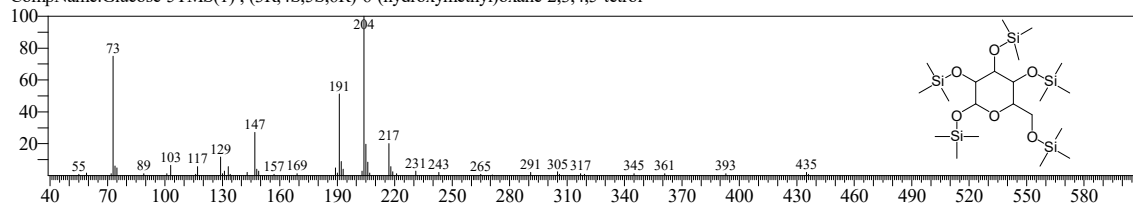

Hit#:2 Entry:345 Library:OA\_TMS\_DB5\_67min\_V3.lib

SI:33 Formula:C<sub>21</sub>H<sub>52</sub>O<sub>6</sub>Si<sub>5</sub> CAS:59-23-4 MolWeight:540 RetIndex:1868

CompName:Galactose-5TMS(2) ; (3R,4S,5R,6R)-6-(hydroxymethyl)oxane-2,3,4,5-tetrol

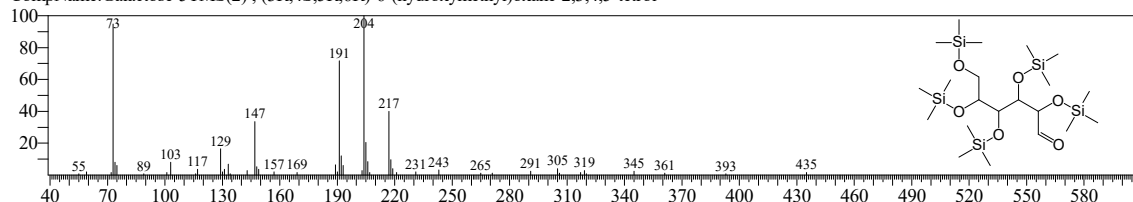

Hit#:3 Entry:238 Library:OA\_TMS\_DB5\_67min\_V3.lib

SI:32 Formula:C<sub>17</sub>H<sub>42</sub>O<sub>5</sub>Si<sub>4</sub> CAS:1114-34-7 MolWeight:438 RetIndex:1675

CompName:Lyxose-4TMS(2) ; (2S,3S,4R)-2,3,4,5-tetrahydroxypentanal

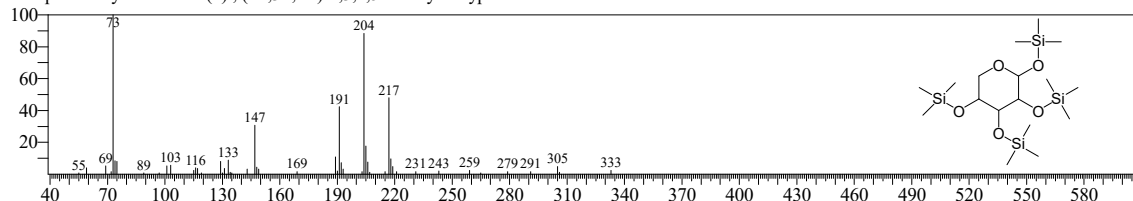

Hit#:4 Entry:267 Library:OA\_TMS\_DB5\_67min\_V3.lib

SI:32 Formula:C<sub>17</sub>H<sub>42</sub>O<sub>5</sub>Si<sub>4</sub> CAS:58-86-6 MolWeight:438 RetIndex:1732

CompName:Xylose-4TMS(1) ; (2R,3S,4R)-2,3,4,5-tetrahydroxypentanal

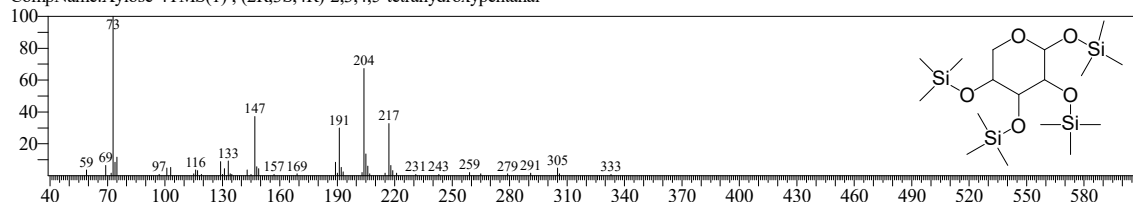

Hit#:5 Entry:348 Library:OA\_TMS\_DB5\_67min\_V3.lib

SI:31 Formula:C<sub>21</sub>H<sub>52</sub>O<sub>6</sub>Si<sub>5</sub> CAS:3458-28-4 MolWeight:540 RetIndex:1872

CompName:Mannose-5TMS(2) ; (3S,4S,5S,6R)-6-(hydroxymethyl)oxane-2,3,4,5-tetrol

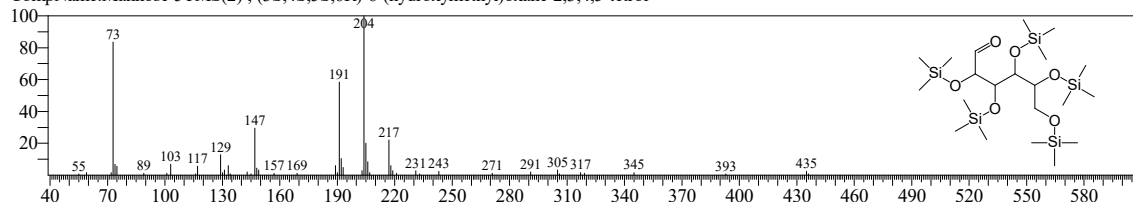

# TNAU

<< Target >>

Line#:17 R.Time:32.030(Scan#:5507) MassPeaks:291

RawMode:Averaged 32.025-32.035(5506-5508) BasePeak:207.05(2041)

BG Mode:Calc. from Peak Group 1 - Event 1 Q3 Scan

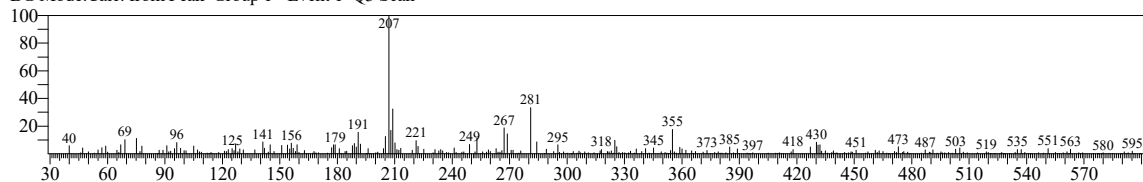

Hit#:1 Entry:341 Library:OA\_TMS\_DB5\_67min\_V3.lib

SI:27 Formula:C18H34O4Si3 CAS:3247-75-4 MolWeight:398 RetIndex:1864

CompName:3-(3-Hydroxyphenyl)-3-hydroxypropionic acid-3TMS ; 3-hydroxy-3-(3-hydroxyphenyl)propanoic acid

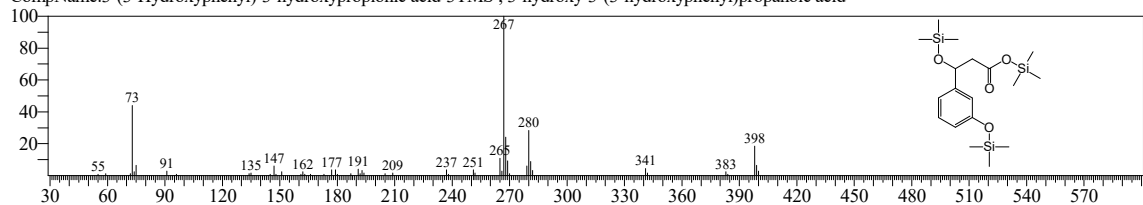

Hit#:2 Entry:402 Library:OA\_TMS\_DB5\_67min\_V3.lib

SI:27 Formula:C20H42O4Si4 CAS:775-01-9 MolWeight:458 RetIndex:1942

CompName:3,4-Dihydroxymandelic acid-4TMS ; 2-(3,4-dihydroxyphenyl)-2-hydroxyacetic acid

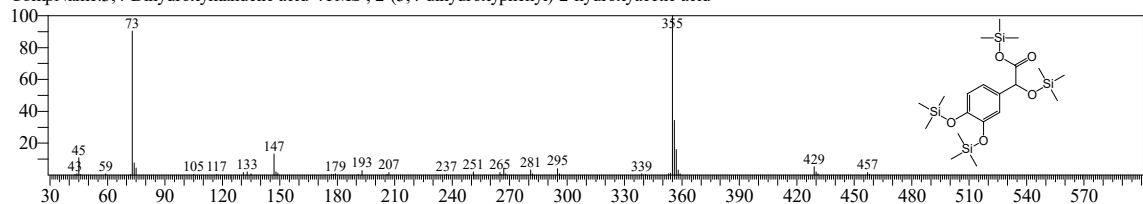

Hit#:3 Entry:211 Library:OA\_TMS\_DB5\_67min\_V3.lib

SI:24 Formula:C13H22O3Si2 CAS:99-96-7 MolWeight:282 RetIndex:1636

CompName:4-Hydroxybenzoic acid-2TMS ; 4-hydroxybenzoic acid

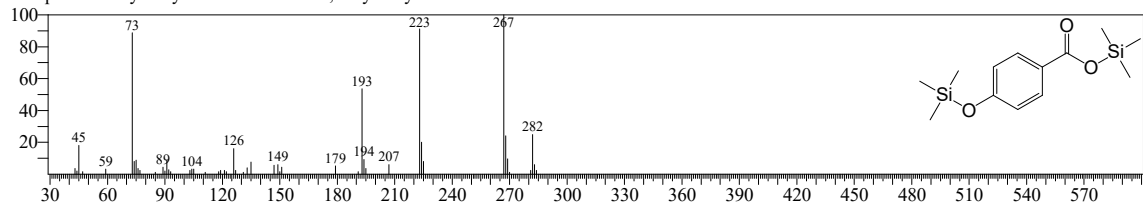

Hit#:4 Entry:382 Library:OA\_TMS\_DB5\_67min\_V3.lib

SI:24 Formula:C18H34O4Si3 CAS:6482-98-0 MolWeight:398 RetIndex:1918

CompName:4-Hydroxyphenyllactic acid-3TMS ; 2-hydroxy-3-(4-hydroxyphenyl)propanoate

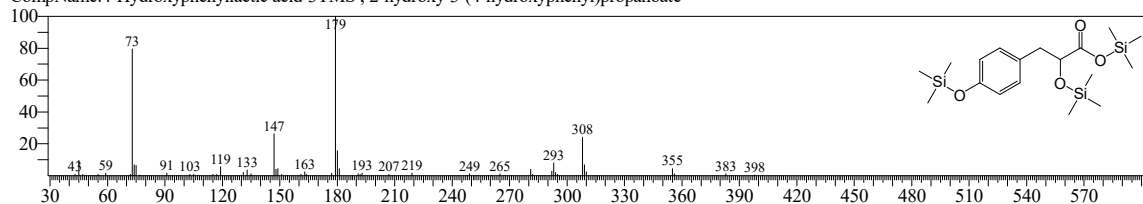

Hit#:5 Entry:330 Library:OA\_TMS\_DB5\_67min\_V3.lib

SI:24 Formula:C12H17NO3Si CAS:66407-11-2 MolWeight:251 RetIndex:1849

CompName:Hippuric acid-TMS ; 2-benzamidoacetic acid

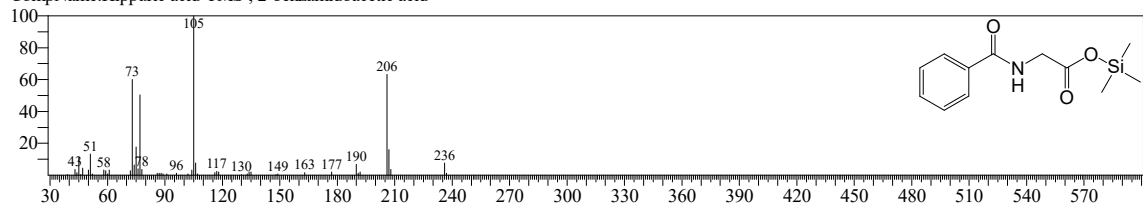

# TNAU

<< Target >>

Line#:18 R.Time:32.695(Scan#:5640) MassPeaks:304

RawMode:Averaged 32.690-32.700(5639-5641) BasePeak:281.05(1077)

BG Mode:Calc. from Peak Group 1 - Event 1 Q3 Scan

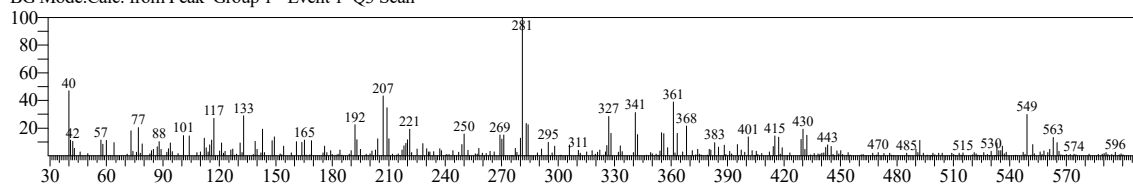

Hit#:1 Entry:402 Library:OA\_TMS\_DB5\_67min\_V3.lib

SI:27 Formula:C20H42O4Si4 CAS:775-01-9 MolWeight:458 RetIndex:1942

CompName:3,4-Dihydroxymandelic acid-4TMS ; 2-(3,4-dihydroxyphenyl)-2-hydroxyacetic acid

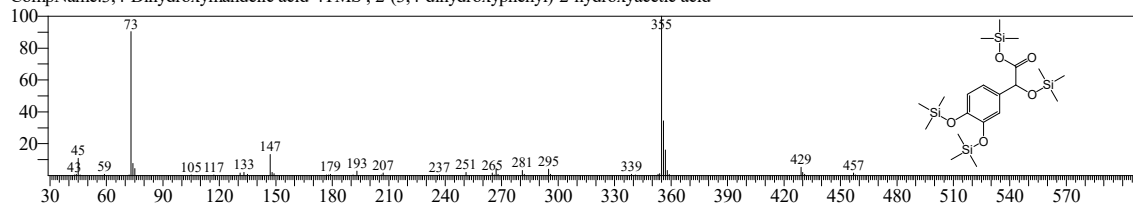

Hit#:2 Entry:561 Library:OA\_TMS\_DB5\_67min\_V3.lib

SI:27 Formula:C37H89NO11Si8 CAS:499-40-1 MolWeight:947 RetIndex:2983

CompName:Isomaltose-meto-8TMS(2) ; (3R,4S,5S,6R)-6-[[[(2S,3R,4S,5S,6R)-3,4,5-trihydroxy-6-(hydroxymethyl)oxan-2-yl]oxymethyl]oxane-2,3,

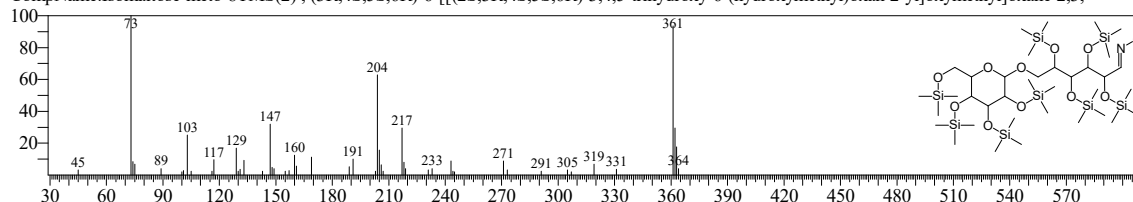

Hit#:3 Entry:256 Library:OA\_TMS\_DB5\_67min\_V3.lib

SI:27 Formula: CAS:0-00-0 MolWeight:472 RetIndex:1698

CompName:Ribose-13C5-meto-4TMS ;

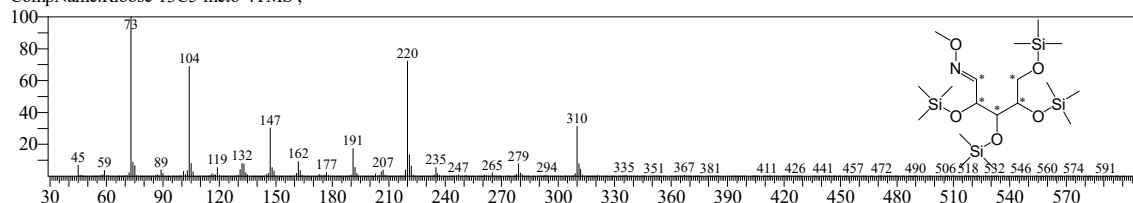

Hit#:4 Entry:431 Library:OA\_TMS\_DB5\_67min\_V3.lib

SI:27 Formula:C21H45NO3Si4 CAS:51-43-4 MolWeight:471 RetIndex:1989

CompName:Epinephrine-4TMS ; 4-[(1R)-1-hydroxy-2-(methylamino)ethyl]benzene-1,2-diol

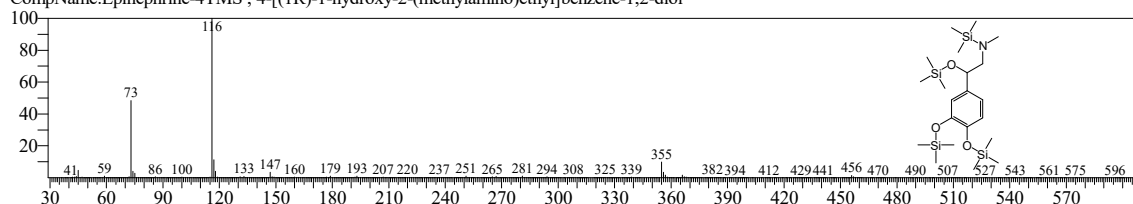

Hit#:5 Entry:552 Library:OA\_TMS\_DB5\_67min\_V3.lib

SI:26 Formula:C36H86O11Si8 CAS:99-20-7 MolWeight:918 RetIndex:2812

CompName:Trehalose-8TMS ; (2R,3S,4S,5R,6R)-2-(hydroxymethyl)-6-[(2R,3R,4S,5S,6R)-3,4,5-trihydroxy-6-(hydroxymethyl)oxan-2-yl]oxyoxane-

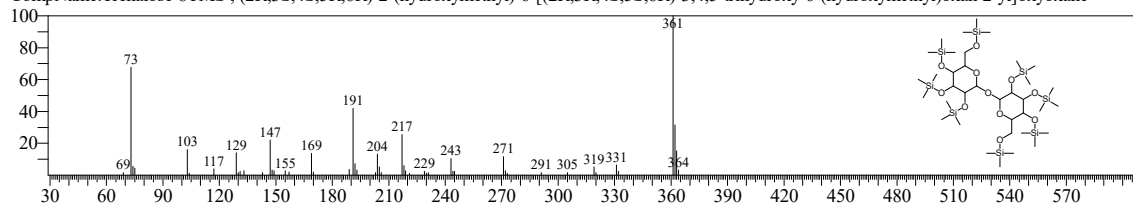

# TNAU

<< Target >>

Line#:19 R.Time:32.735(Scan#:5648) MassPeaks:300

RawMode:Averaged 32.730-32.740(5647-5649) BasePeak:281.05(1115)

BG Mode:Calc. from Peak Group 1 - Event 1 Q3 Scan

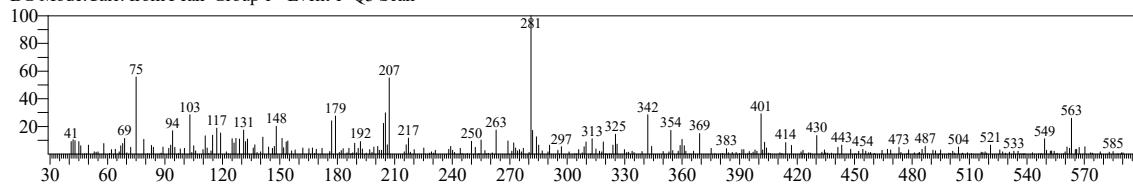

Hit#:1 Entry:539 Library:OA\_TMS\_DB5\_67min\_V3.lib

SI:40 Formula:C27H60O3Si2 CAS:544-62-7 MolWeight:488 RetIndex:2684

CompName:Batyl alcohol-2TMS ; 3-octadecoxypropane-1,2-diol

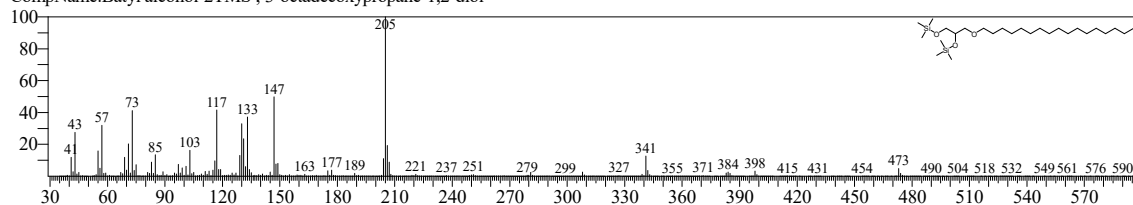

Hit#:2 Entry:491 Library:OA\_TMS\_DB5\_67min\_V3.lib

SI:32 Formula:C21H44O2Si CAS:57-11-4 MolWeight:356 RetIndex:2244

CompName:Stearic acid-TMS ; octadecanoic acid

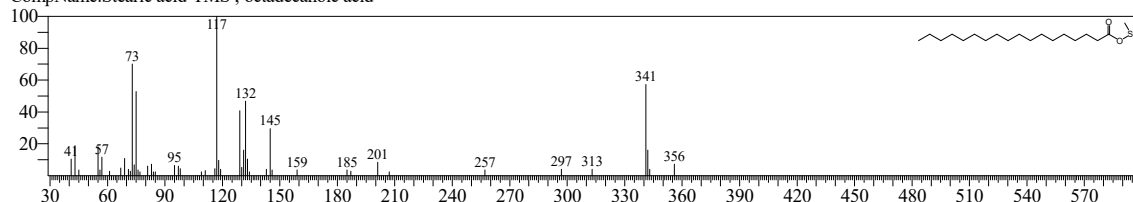

Hit#:3 Entry:446 Library:OA\_TMS\_DB5\_67min\_V3.lib

SI:31 Formula:C19H40O2Si CAS:57-10-3 MolWeight:328 RetIndex:2046

CompName:Palmitic acid-TMS ; hexadecanoic acid

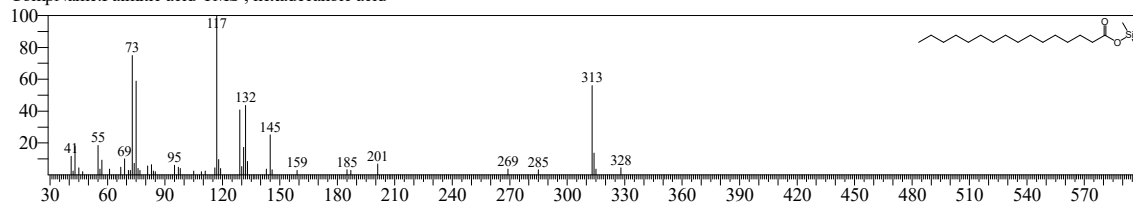

Hit#:4 Entry:382 Library:OA\_TMS\_DB5\_67min\_V3.lib

SI:30 Formula:C18H34O4Si3 CAS:6482-98-0 MolWeight:398 RetIndex:1918

CompName:4-Hydroxyphenyllactic acid-3TMS ; 2-hydroxy-3-(4-hydroxyphenyl)propanoate

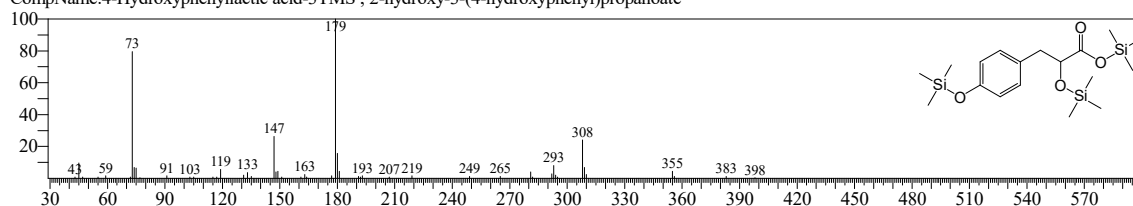

Hit#:5 Entry:276 Library:OA\_TMS\_DB5\_67min\_V3.lib

SI:29 Formula:C18H44O5Si4 CAS:154-17-6 MolWeight:452 RetIndex:1745

CompName:2-Deoxy-glucose-4TMS(1) ; (2S,4S,5S,6S)-6-(hydroxymethyl)oxane-2,4,5-triol

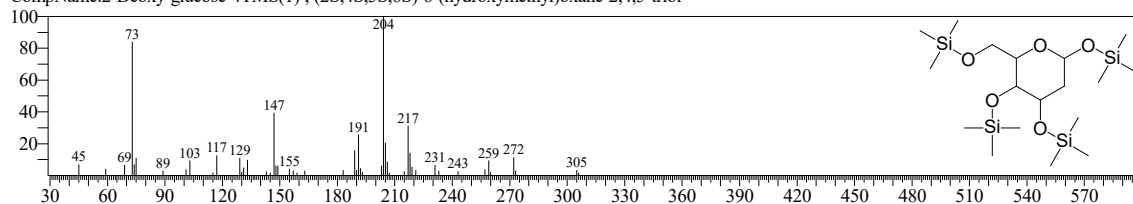

Supplement: Supplementary file 51 [file supplementary]
