# Supplementary material for: Comparative Metabolomics Profiling Reveals Key Metabolites and Associated Pathways Regulating Tuber Dormancy in White Yam (<em>Dioscorea rotundata</em>)
Source: Preprints.org preprint supplement (doi:10.20944/preprints202303.0378.v1), 2023-03-21

# TNAU

## Sample Information

Analyzed by : Admin  
 Analyzed : 02-Sep-22 5:19:35 PM  
 Sample Type : Unknown  
 Level # : 1  
 Sample Name : Sample  
 Sample ID : 9-3  
 IS Amount : [1]=1  
 Sample Amount : 1  
 Dilution Factor : 1  
 Vial # : 10  
 Injection Volume : 5.00  
 Data File : D:\GCMS-8040NX\Sep 2022\Users\01.09.2022\01092022028.qgd  
 Org Data File : D:\GCMS-8040NX\Sep 2022\Users\01.09.2022\01092022028.qgd  
 Method File : D:\GCMS-8040NX\Sep 2022\Method\Scan\_methodfile.qgm  
 Org Method File : D:\GCMS-8040NX\Sep 2022\Method\Scan\_methodfile.qgm  
 Report File :  
 Tuning File : D:\GCMS-8040NX\Aug 2022\Tuning Data\TUNING 25082022.qgt  
 Modified by : Admin  
 Modified : 05-Sep-22 11:09:03 AM

Chromatogram Sample D:\GCMS-8040NX\Sep 2022\Users\01.09.2022\01092022028.qgd

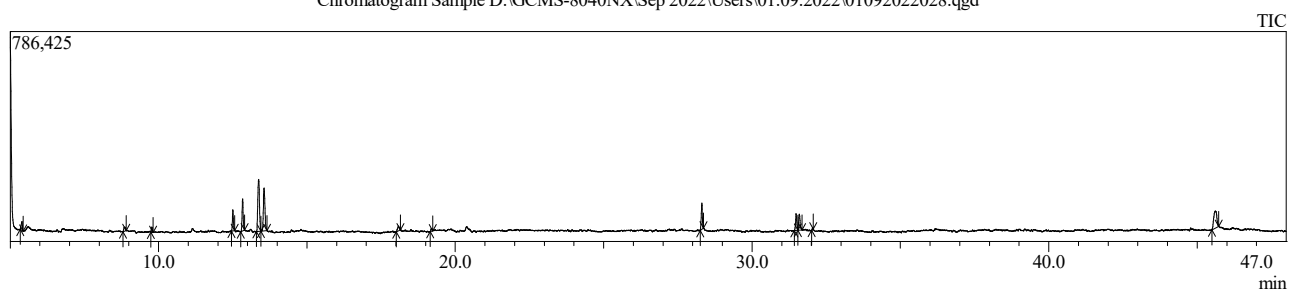

## Peak Report TIC

| Peak# | R.Time | Area    | Area%  | Height | Height% | A/H  | Similarity | Name                                          |
|-------|--------|---------|--------|--------|---------|------|------------|-----------------------------------------------|
| 1     | 5.395  | 89884   | 2.73   | 32430  | 3.44    | 2.77 | 80         | (2-Chloroethyl)(methyl)amine, N-trifluoroacet |
| 2     | 8.862  | 60598   | 1.84   | 15233  | 1.62    | 3.98 | 84         | 1-Butanol, 3-methyl-, acetate                 |
| 3     | 9.776  | 41466   | 1.26   | 18712  | 1.99    | 2.22 | 93         | Pentasiloxane, dodecamethyl-                  |
| 4     | 12.504 | 193148  | 5.88   | 79615  | 8.46    | 2.43 | 73         | 2,5-Cyclohexadiene-1,4-dione, dioxime         |
| 5     | 12.831 | 315203  | 9.59   | 120040 | 12.75   | 2.63 | 73         | 2,5-Cyclohexadiene-1,4-dione, dioxime         |
| 6     | 13.373 | 761417  | 23.16  | 194450 | 20.66   | 3.92 | 53         | Methyl cis-13,16-Docosadienate                |
| 7     | 13.555 | 608104  | 18.50  | 161232 | 17.13   | 3.77 | 54         | Methyl cis-13,16-Docosadienate                |
| 8     | 18.080 | 75668   | 2.30   | 17993  | 1.91    | 4.21 | 91         | .beta.-D-Glucopyranose, 1,6-anhydro-          |
| 9     | 19.193 | 26155   | 0.80   | 9733   | 1.03    | 2.69 | 85         | 2,4-Di-tert-butylphenoxytrimethylsilane       |
| 10    | 28.308 | 257388  | 7.83   | 97994  | 10.41   | 2.63 | 95         | n-Hexadecanoic acid                           |
| 11    | 31.486 | 179551  | 5.46   | 62669  | 6.66    | 2.87 | 95         | 9,12-Octadecadienoic acid (Z,Z)-              |
| 12    | 31.593 | 202866  | 6.17   | 59094  | 6.28    | 3.43 | 89         | cis-9-Hexadecenal                             |
| 13    | 32.038 | 12217   | 0.37   | 8229   | 0.87    | 1.48 | 83         | Octadecanoic acid                             |
| 14    | 45.611 | 463831  | 14.11  | 63972  | 6.80    | 7.25 | 90         | Diosgenin                                     |
|       |        | 3287496 | 100.00 | 941396 | 100.00  |      |            |                                               |

Library

# TNAU

<< Target >>

Line#:1 R.Time:13.370(Scan#:1675) MassPeaks:285  
RawMode:Averaged 13.365-13.375(1674-1676) BasePeak:155.05(31619)  
BG Mode:Calc. from Peak Group 1 - Event 1 Q3 Scan

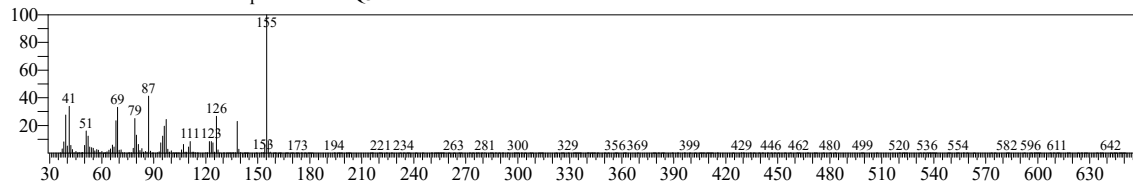

Hit#:1 Entry:34 Library:FA\_ME\_SP2560\_EI\_V3.lib  
SI:53 Formula:C23H42O2 CAS:7370-49-2 MolWeight:350 RetIndex:3169  
CompName:Methyl cis-13,16-Docosadienate ; (13Z,16E)-docosa-13,16-dienoic acid

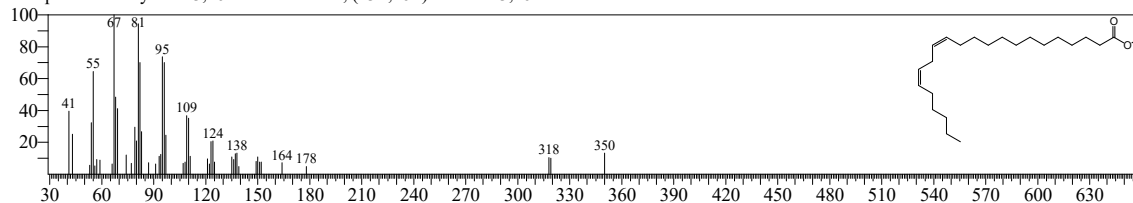

Hit#:2 Entry:21 Library:FA\_ME\_SP2560\_EI\_V3.lib  
SI:52 Formula:C19H34O2 CAS:60-33-3 MolWeight:294 RetIndex:2775  
CompName:Methyl linoleate ; Octadeca-9,12-dienoic acid

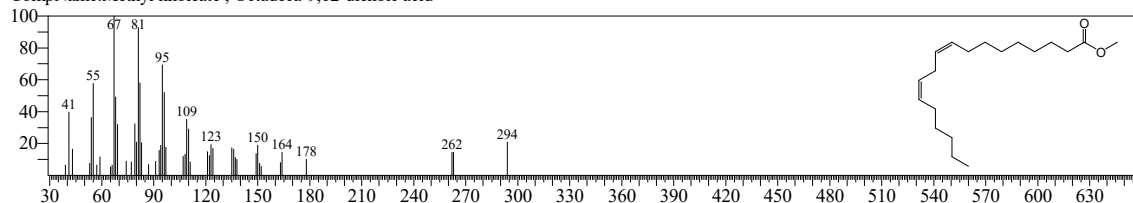

Hit#:3 Entry:20 Library:FA\_ME\_SP2560\_EI\_V3.lib  
SI:52 Formula:C19H34O2 CAS:506-21-8 MolWeight:294 RetIndex:2727  
CompName:Methyl linolealdate ; (9E,12E)-octadeca-9,12-dienoic acid

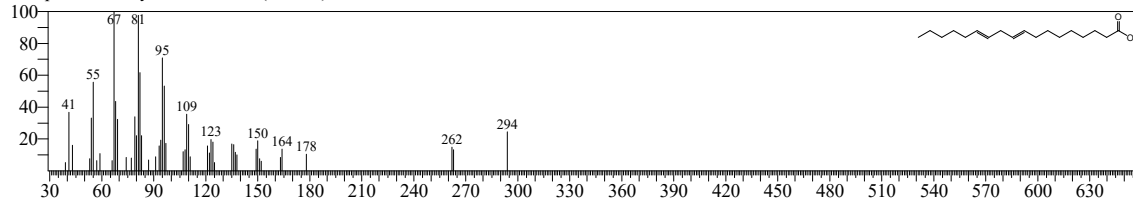

Hit#:4 Entry:27 Library:FA\_ME\_SP2560\_EI\_V3.lib  
SI:52 Formula:C21H38O2 CAS:2091-39-6 MolWeight:322 RetIndex:2973  
CompName:Methyl cis-11,14-Icosadienoate ; Icosa-11,14-dienoic acid

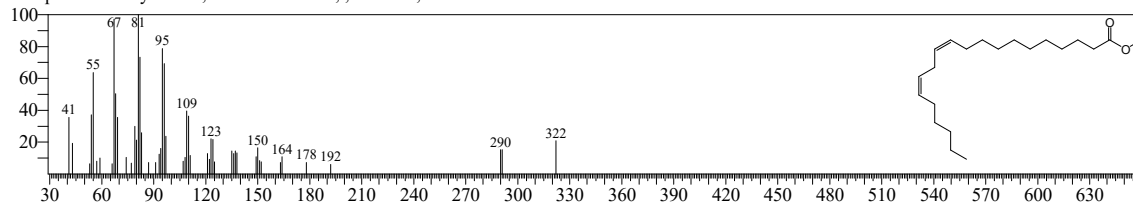

Hit#:5 Entry:11 Library:FA\_ME\_SP2560\_EI\_V3.lib  
SI:52 Formula:C16H30O2 CAS:84743-29-3 MolWeight:254 RetIndex:2388  
CompName:Methyl cis-10-pentadecenoate ; (Z)-pentadec-10-enoic acid

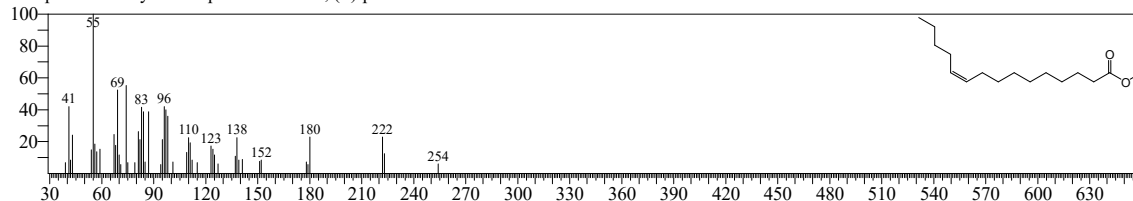

# TNAU

<< Target >>

Line#:2 R.Time:5.395(Scan#:80) MassPeaks:298

RawMode:Averaged 5.390-5.400(79-81) BasePeak:140.05(13075)

BG Mode:Calc. from Peak Group 1 - Event 1 Q3 Scan

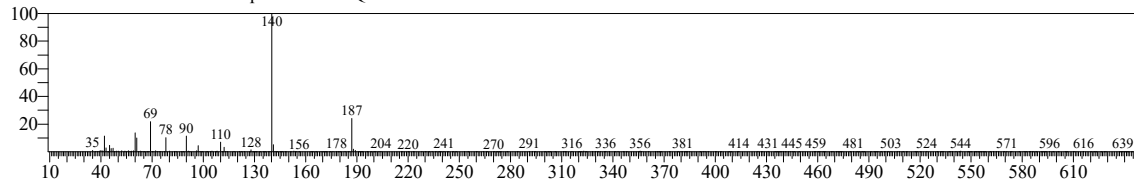

Hit#:1 Entry:43299 Library:NIST20M1.lib

SI:80 Formula:C5H7ClF3NO CAS:18060-05-4 MolWeight:189 RetIndex:779

CompName:(2-Chloroethyl)(methyl)amine, N-trifluoroacetyl- \$\$ (2-Chloroethyl)(methyl)amine, TFA derivative \$\$ Ethanamine, 2-chloro-N-methyl-, N-trifluoroacetyl-

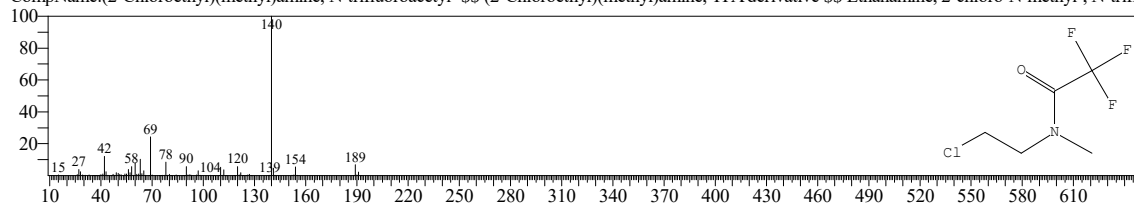

Hit#:2 Entry:52064 Library:NIST20M1.lib

SI:79 Formula:C6H8F3NO3 CAS:0-00-0 MolWeight:199 RetIndex:820

CompName:Sarcosine, N-trifluoroacetyl-, methyl ester

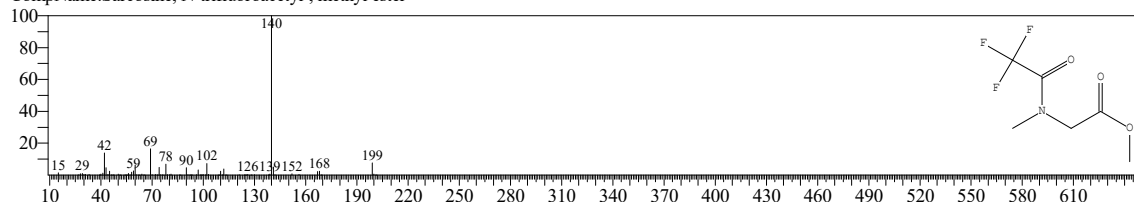

Hit#:3 Entry:40334 Library:NIST20M1.lib

SI:79 Formula:C5H6F3NO3 CAS:0-00-0 MolWeight:185 RetIndex:910

CompName:Sarcosine, N-trifluoroacetyl-

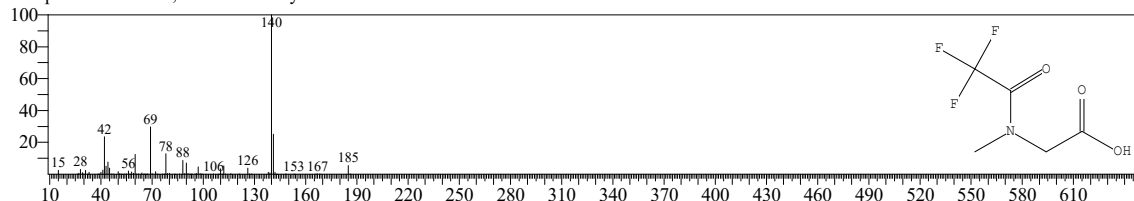

Hit#:4 Entry:122117 Library:NIST20M1.lib

SI:78 Formula:C7H8F6N2O2 CAS:0-00-0 MolWeight:266 RetIndex:987

CompName:2,2,2-Trifluoro-N-methyl-N-{2-[(trifluoroacetyl)amino]ethyl}acetamide

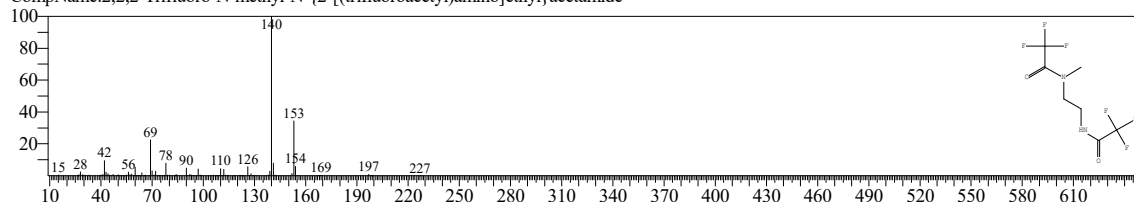

Hit#:5 Entry:65348 Library:NIST20M1.lib

SI:77 Formula:C7H10F3NO3 CAS:0-00-0 MolWeight:213 RetIndex:919

CompName:Sarcosine, N-trifluoroacetyl-, ethyl ester

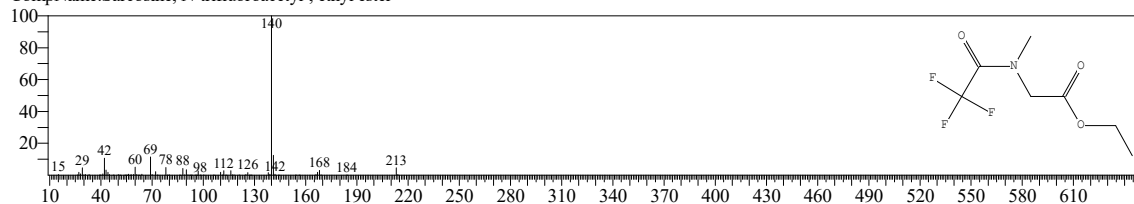

# TNAU

<< Target >>

Line#3 R.Time:8.860(Scan#:773) MassPeaks:393

RawMode:Averaged 8.855-8.865(772-774) BasePeak:43.05(2692)

BG Mode:Calc. from Peak Group 1 - Event 1 Q3 Scan

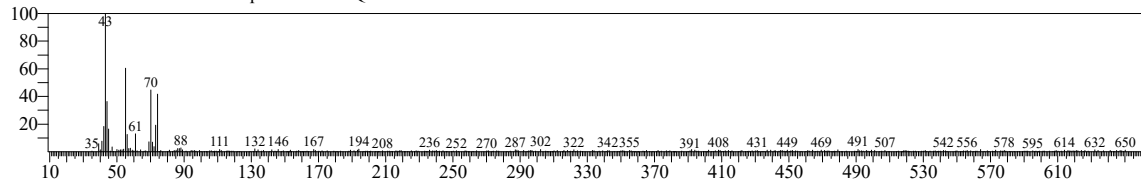

Hit#1 Entry:6783 Library:NIST20R.lib

SI:84 Formula:C7H14O2 CAS:123-92-2 MolWeight:130 RetIndex:820

CompName:1-Butanol, 3-methyl-, acetate \$\$ Isopentyl alcohol, acetate \$\$ Acetic acid, 3-methylbutyl ester \$\$ Banana oil \$\$ Isoamyl acetate \$\$ Isoamyl etha

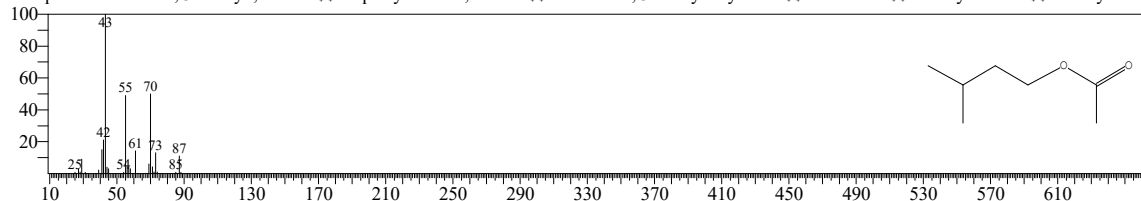

Hit#2 Entry:8685 Library:NIST20M1.lib

SI:81 Formula:C7H14O2 CAS:628-63-7 MolWeight:130 RetIndex:884

CompName:Acetic acid, pentyl ester \$\$ n-Amyl acetate \$\$ n-Pentyl acetate \$\$ Amyl acetate \$\$ Birnenöl \$\$ Pentyl acetate \$\$ Acetic acid, amyl ester \$\$ Arr

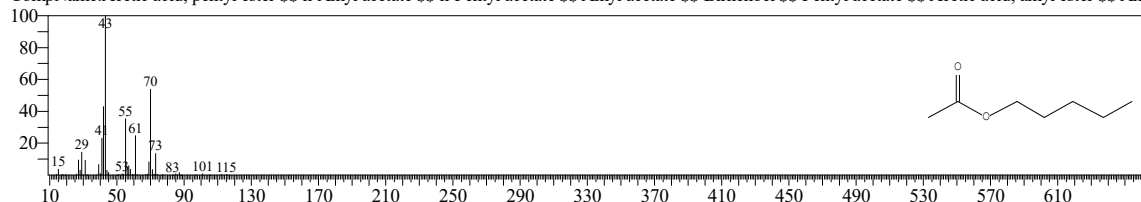

Hit#3 Entry:6819 Library:NIST20R.lib

SI:80 Formula:C7H14O2 CAS:624-41-9 MolWeight:130 RetIndex:820

CompName:1-Butanol, 2-methyl-, acetate \$\$ 2-Methyl-1-butyl acetate \$\$ 2-Methylbutyl acetate \$\$ Acetic acid 2-methylbutyl ester \$\$ 2-Methylbutyl acetate

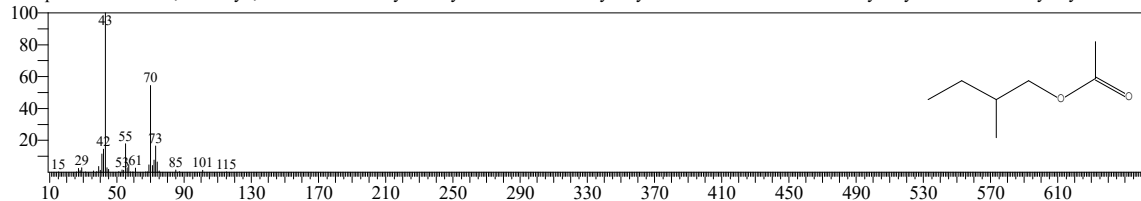

Hit#4 Entry:1220 Library:NIST20R.lib

SI:79 Formula:C4H8O2 CAS:590-90-9 MolWeight:88 RetIndex:798

CompName:CH3C(O)CH2CH2OH \$\$ Methylolacetone \$\$ Monomethylolacetone \$\$ 3-Ketobutan-1-ol \$\$ 3-Oxo-1-butanol \$\$ 3-Oxobutanol \$\$ 4-Butanol-100

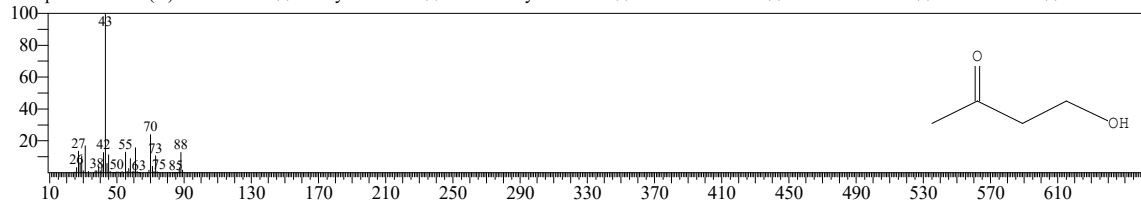

Hit#5 Entry:8539 Library:NIST20M1.lib

SI:78 Formula:C6H10O3 CAS:6628-79-1 MolWeight:130 RetIndex:1046

CompName:Pentanoic acid, 3-methyl-4-oxo- \$\$ 3-Methyl-4-oxopentanoic acid \$\$ Levulinic acid, 3-methyl \$\$ 3-Methyllevulinic acid

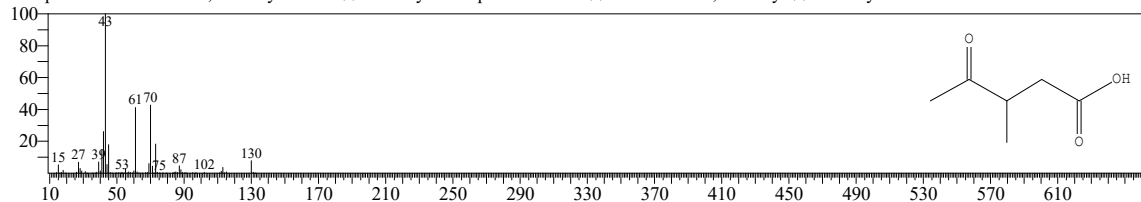

# TNAU

<< Target >>

Line#:4 R.Time:9.775(Scan#:956) MassPeaks:323

RawMode:Averaged 9.770-9.780(955-957) BasePeak:281.05(4406)

BG Mode:Calc. from Peak Group 1 - Event 1 Q3 Scan

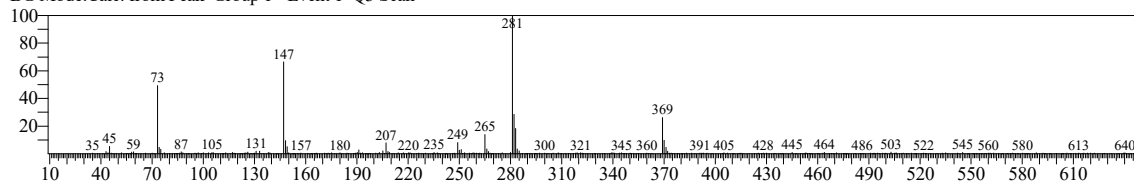

Hit#:1 Entry:40975 Library:NIST20R.lib

SI:93 Formula:C12H36O4Si5 CAS:141-63-9 MolWeight:384 RetIndex:1068

CompName:Pentasiloxane, dodecamethyl- \$\$ Dodecamethylpentasiloxane \$\$ 1,1,1,3,3,5,5,7,7,9,9-Dodecamethylpentasiloxane #

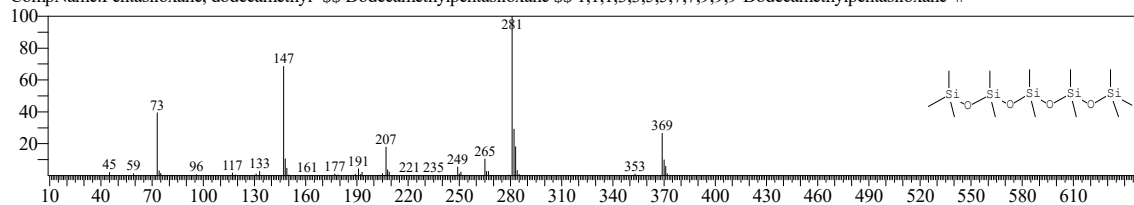

Hit#:2 Entry:249272 Library:NIST20M1.lib

SI:84 Formula:C12H36O4Si5 CAS:3555-47-3 MolWeight:384 RetIndex:1068

CompName:Trisiloxane, 1,1,1,5,5,5-hexamethyl-3,3-bis[(trimethylsilyl)oxy]- \$\$ Tetrakis(trimethylsiloxy)silane \$\$ Trisiloxane, 1,1,1,5,5,5-hexamethyl-3,3-b

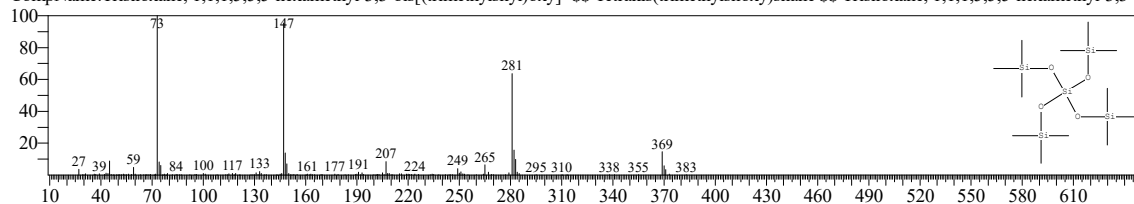

Hit#:3 Entry:27848 Library:NIST20M2.lib

SI:81 Formula:C18H48O4Si5 CAS:0-00-0 MolWeight:468 RetIndex:1495

CompName:1,3,5,7,9-Pentasiloxane, 1,1,3,3,5,5,7,7,9,9-decamethyl-1,9-di(tert.butyl)-

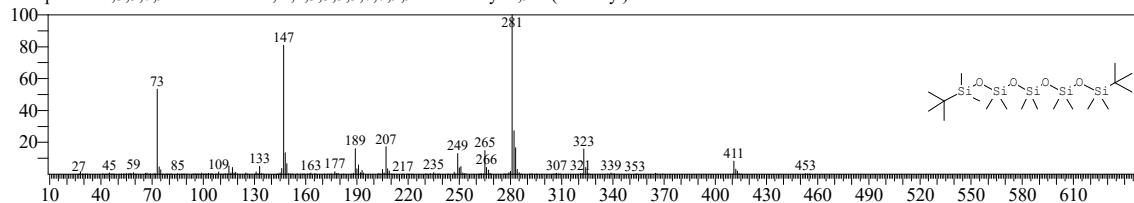

Hit#:4 Entry:249271 Library:NIST20M1.lib

SI:80 Formula:C12H36O4Si5 CAS:38146-99-5 MolWeight:384 RetIndex:1068

CompName:1,1,1,3,3,5,5,7,7-Nonamethyl-3-(trimethylsiloxy)tetrasiloxane \$\$ 1,1,1,3,3,5,5,7,7-Nonamethyl-5-[(trimethylsilyl)oxy]tetrasiloxane #

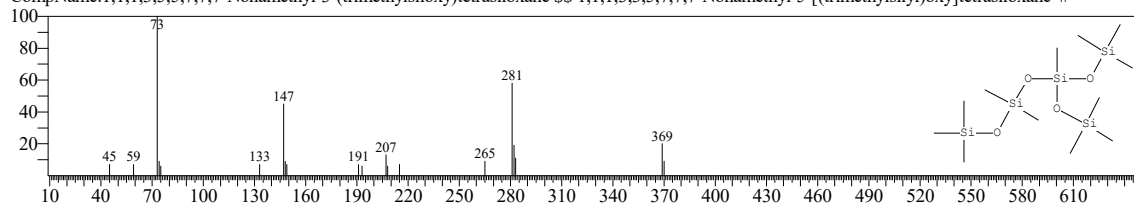

Hit#:5 Entry:158097 Library:NIST20M1.lib

SI:76 Formula:C14H24O3Si2 CAS:0-00-0 MolWeight:296 RetIndex:1625

CompName:2,6-Dihydroxyacetophenone, 2TMS derivative \$\$ 2',6'-Dihydroxyacetophenone, bis(trimethylsilyl) ether

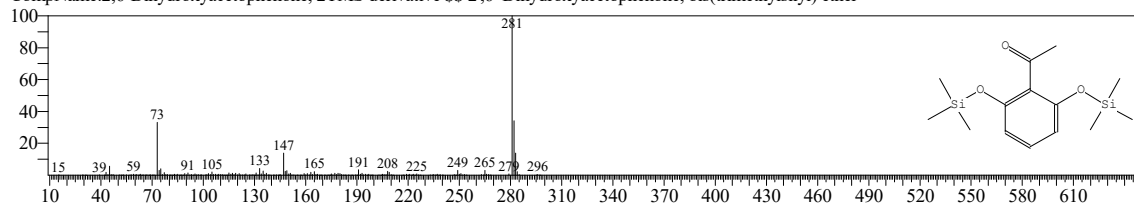

# TNAU

<< Target >>

Line#5 R.Time:12.505(Scan#:1502) MassPeaks:314

RawMode:Averaged 12.500-12.510(1501-1503) BasePeak:138.05(28095)

BG Mode:Calc. from Peak Group 1 - Event 1 Q3 Scan

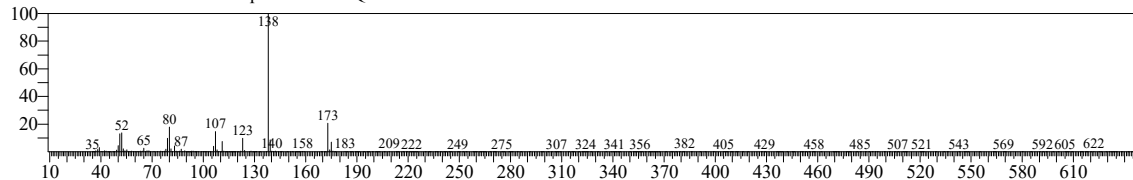

Hit#:1 Entry:8360 Library:NIST20R.lib

SI:73 Formula:C<sub>6</sub>H<sub>6</sub>N<sub>2</sub>O<sub>2</sub> CAS:105-11-3 MolWeight:138 RetIndex:1349

CompName:2,5-Cyclohexadiene-1,4-dione, dioxime \$\$ p-Benzoquinone, dioxime \$\$ p-Quinone dioxime \$\$ p-Quinone oxime \$\$ Benzoquinone dioxime \$\$

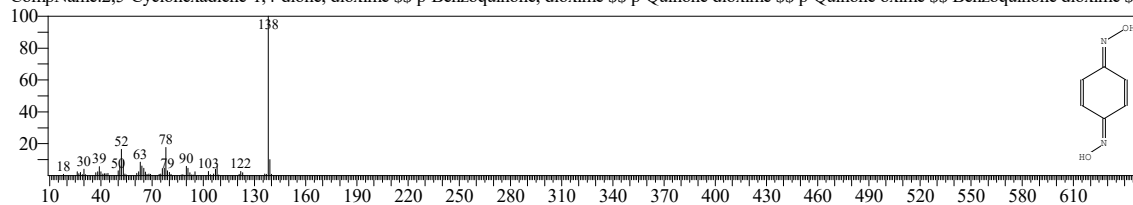

Hit#:2 Entry:74679 Library:NIST20M1.lib

SI:70 Formula:C<sub>12</sub>H<sub>14</sub>O<sub>4</sub> CAS:37577-71-2 MolWeight:222 RetIndex:1667

CompName:2,3-Dimethylhydroquinone, diacetate

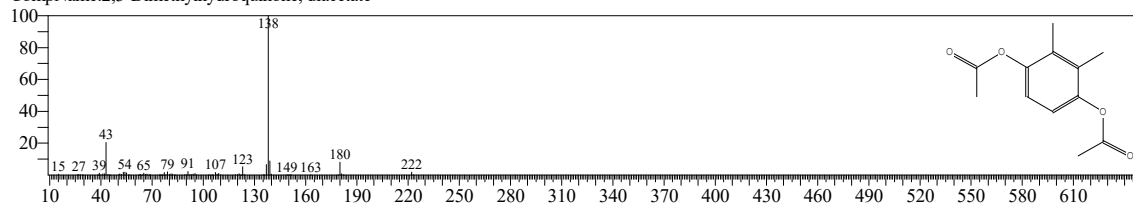

Hit#:3 Entry:74622 Library:NIST20M1.lib

SI:70 Formula:C<sub>12</sub>H<sub>14</sub>O<sub>4</sub> CAS:57982-10-2 MolWeight:222 RetIndex:1653

CompName:2-Ethylhydroquinone, diacetate

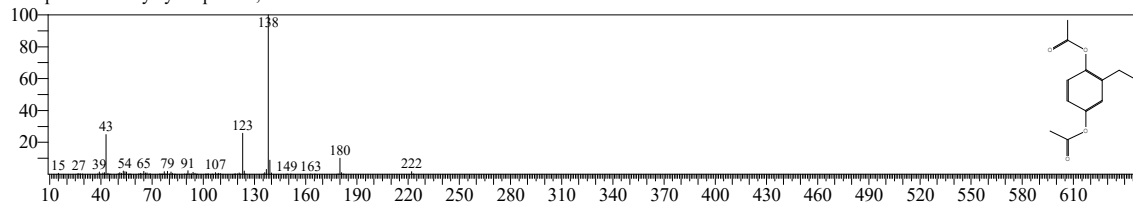

Hit#:4 Entry:11222 Library:NIST20M1.lib

SI:70 Formula:C<sub>7</sub>H<sub>10</sub>N<sub>2</sub>O CAS:3471-32-7 MolWeight:138 RetIndex:1325

CompName:Hydrazine, (4-methoxyphenyl)- \$\$ (p-Methoxyphenyl)hydrazine \$\$ 1-(4-Methoxyphenyl)hydrazine #

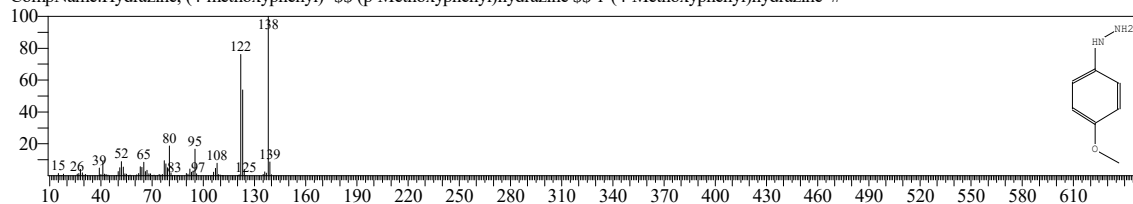

Hit#:5 Entry:34 Library:FA ME\_SP2560\_EI\_V3.lib

SI:36 Formula:C<sub>23</sub>H<sub>42</sub>O<sub>2</sub> CAS:7370-49-2 MolWeight:350 RetIndex:3169

CompName:Methyl cis-13,16-Docosadienate ; (13Z,16E)-docosa-13,16-dienoic acid

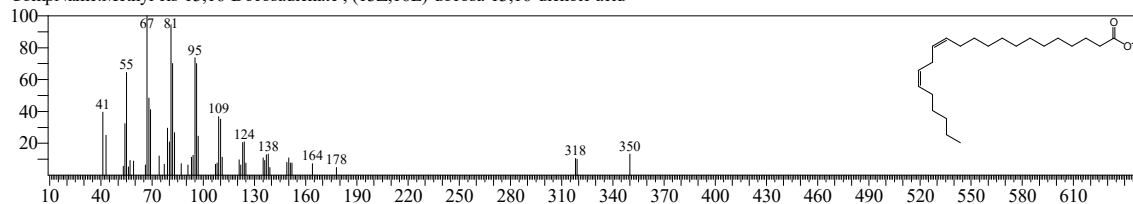

# TNAU

<< Target >>

Line#6 R.Time:12.830(Scan#:1567) MassPeaks:366

RawMode:Averaged 12.825-12.835(1566-1568) BasePeak:138.05(40642)

BG Mode:Calc. from Peak Group 1 - Event 1 Q3 Scan

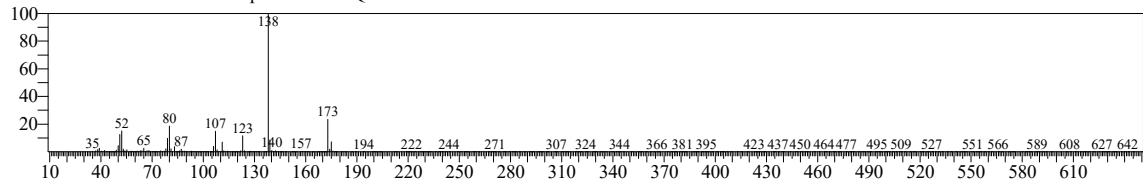

Hit#:1 Entry:8360 Library:NIST20R.lib

SI:73 Formula:C6H6N2O2 CAS:105-11-3 MolWeight:138 RetIndex:1349

CompName:2,5-Cyclohexadiene-1,4-dione, dioxime \$\$ p-Benzoquinone, dioxime \$\$ p-Quinone dioxime \$\$ p-Quinone oxime \$\$ Benzoquinone dioxime \$\$

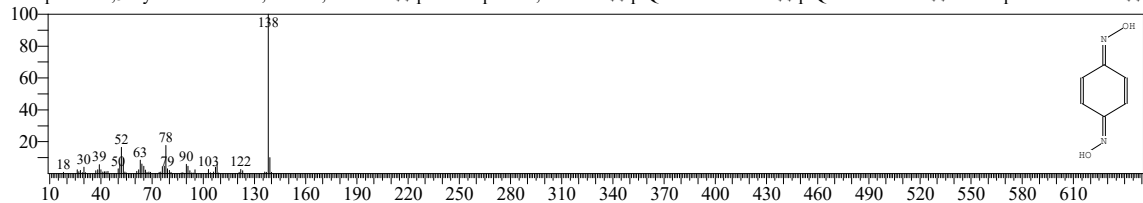

Hit#:2 Entry:11222 Library:NIST20M1.lib

SI:70 Formula:C7H10N2O CAS:3471-32-7 MolWeight:138 RetIndex:1325

CompName:Hydrazine, (4-methoxyphenyl)- \$\$ (p-Methoxyphenyl)hydrazine \$\$ 1-(4-Methoxyphenyl)hydrazine #

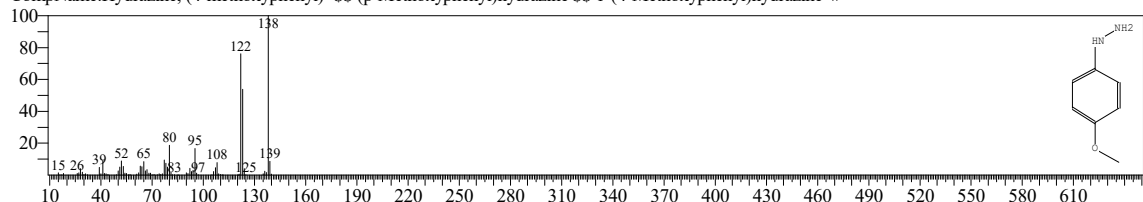

Hit#:3 Entry:25 Library:FA\_ME\_SP2560\_EI\_V3.lib

SI:33 Formula:C19H32O2 CAS:463-40-1 MolWeight:292 RetIndex:2892

CompName:Methyl linolenate ; (9Z,12Z,15Z)-octadeca-9,12,15-trienoic acid

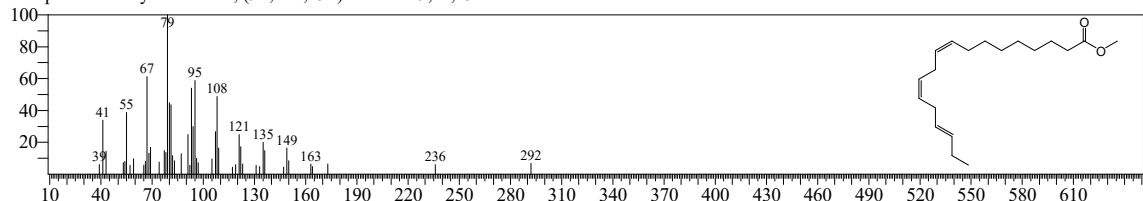

Hit#:4 Entry:137 Library:OA\_TMS\_DB5\_67min\_V3.lib

SI:32 Formula:C9H14N2OSi CAS:98-92-0 MolWeight:194 RetIndex:1486

CompName:Niacinamide-TMS ; pyridine-3-carboxamide

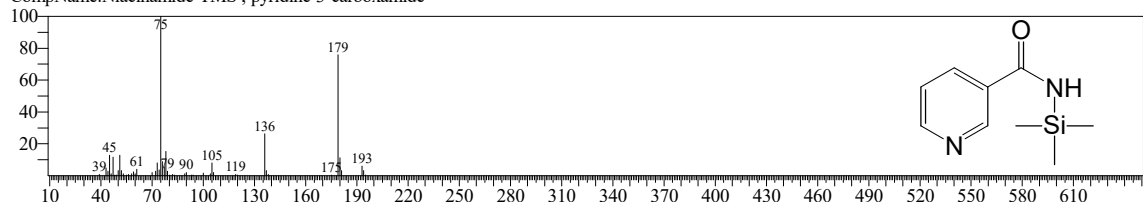

Hit#:5 Entry:21 Library:FA\_ME\_SP2560\_EI\_V3.lib

SI:32 Formula:C19H34O2 CAS:60-33-3 MolWeight:294 RetIndex:2775

CompName:Methyl linoleate ; Octadeca-9,12-dienoic acid

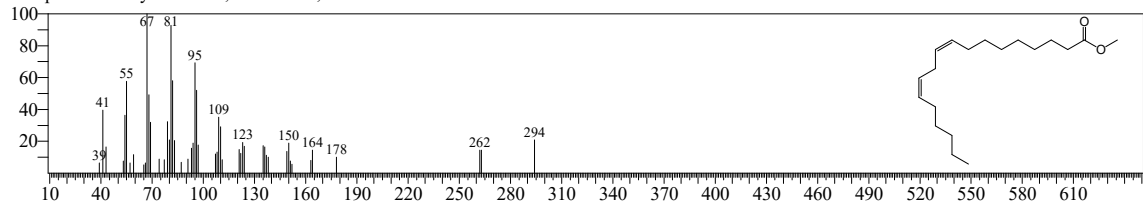

# TNAU

<< Target >>

Line#:7 R.Time:13.370(Scan#:1675) MassPeaks:285

RawMode:Averaged 13.365-13.375(1674-1676) BasePeak:155.05(31619)

BG Mode:Calc. from Peak Group 1 - Event 1 Q3 Scan

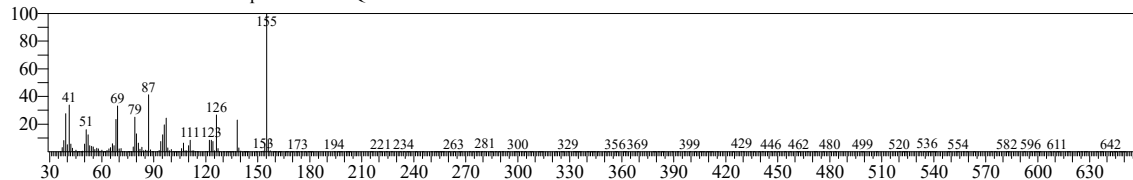

Hit#:1 Entry:34 Library:FA\_ME\_SP2560\_EI\_V3.lib

SI:53 Formula:C23H42O2 CAS:7370-49-2 MolWeight:350 RetIndex:3169

CompName:Methyl cis-13,16-Docosadienate ; (13Z,16E)-docosa-13,16-dienoic acid

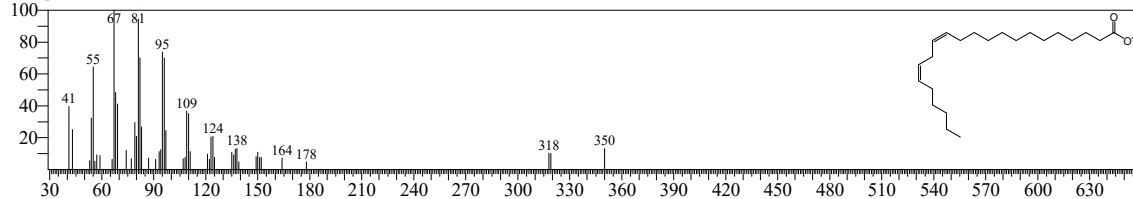

Hit#:2 Entry:21 Library:FA\_ME\_SP2560\_EI\_V3.lib

SI:52 Formula:C19H34O2 CAS:60-33-3 MolWeight:294 RetIndex:2775

CompName:Methyl linoleate ; Octadeca-9,12-dienoic acid

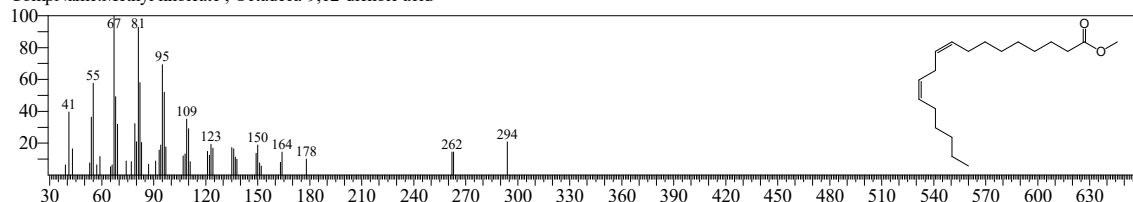

Hit#:3 Entry:20 Library:FA\_ME\_SP2560\_EI\_V3.lib

SI:52 Formula:C19H34O2 CAS:506-21-8 MolWeight:294 RetIndex:2727

CompName:Methyl linolelaidate ; (9E,12E)-octadeca-9,12-dienoic acid

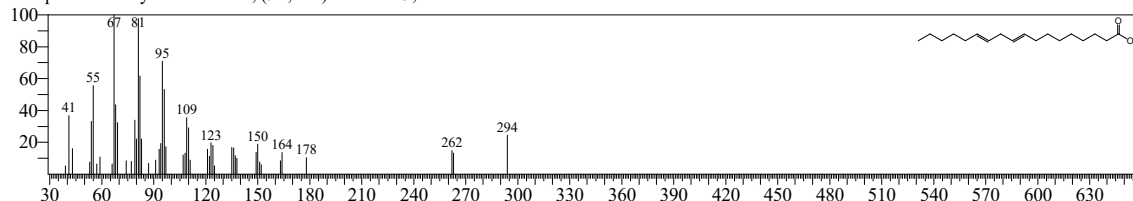

Hit#:4 Entry:27 Library:FA\_ME\_SP2560\_EI\_V3.lib

SI:52 Formula:C21H38O2 CAS:2091-39-6 MolWeight:322 RetIndex:2973

CompName:Methyl cis-11,14-Icosadienoate ; Icosa-11,14-dienoic acid

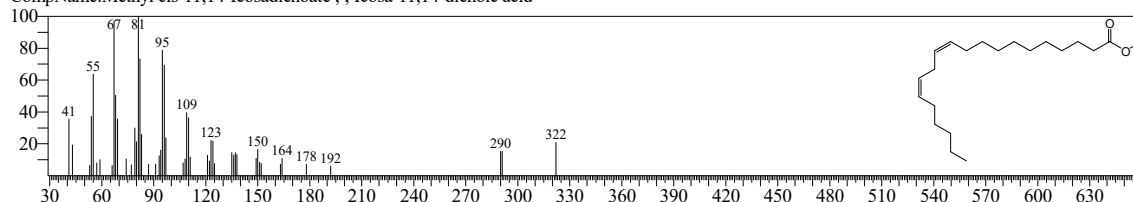

Hit#:5 Entry:11 Library:FA\_ME\_SP2560\_EI\_V3.lib

SI:52 Formula:C16H30O2 CAS:84743-29-3 MolWeight:254 RetIndex:2388

CompName:Methyl cis-10-pentadecenoate ; (Z)-pentadec-10-enoic acid

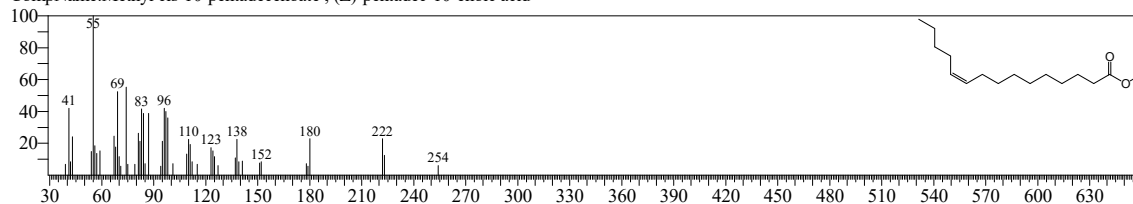



# TNAU

<< Target >>

Line#:8 R.Time:13.555(Scan#:1712) MassPeaks:377

RawMode:Averaged 13.550-13.560(1711-1713) BasePeak:155.05(25382)

BG Mode:Calc. from Peak Group 1 - Event 1 Q3 Scan

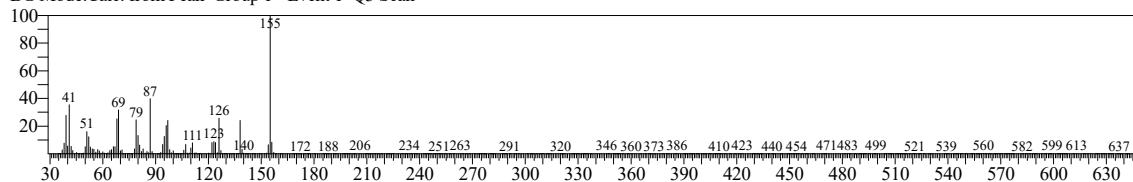

Hit#:1 Entry:34 Library:FA\_ME\_SP2560\_EI\_V3.lib

SI:54 Formula:C23H42O2 CAS:7370-49-2 MolWeight:350 RetIndex:3169

CompName:Methyl cis-13,16-Docosadienate ; (13Z,16E)-docosa-13,16-dienoic acid

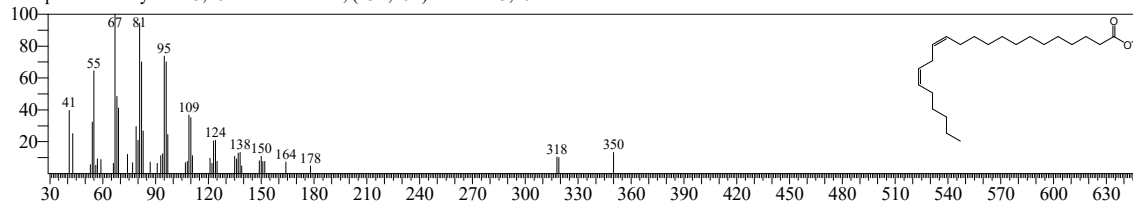

Hit#:2 Entry:21 Library:FA\_ME\_SP2560\_EI\_V3.lib

SI:52 Formula:C19H34O2 CAS:60-33-3 MolWeight:294 RetIndex:2775

CompName:Methyl linoleate ; Octadeca-9,12-dienoic acid

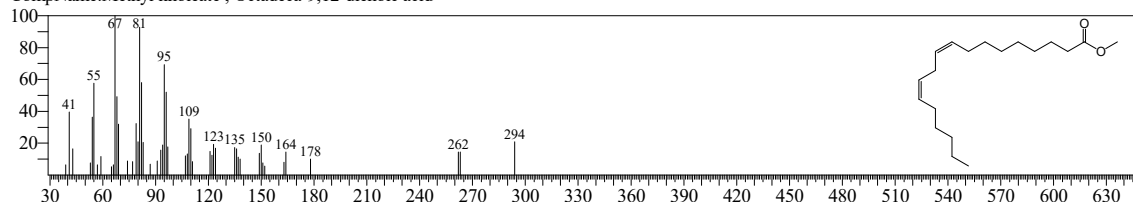

Hit#:3 Entry:20 Library:FA\_ME\_SP2560\_EI\_V3.lib

SI:52 Formula:C19H34O2 CAS:506-21-8 MolWeight:294 RetIndex:2727

CompName:Methyl linolelaidate ; (9E,12E)-octadeca-9,12-dienoic acid

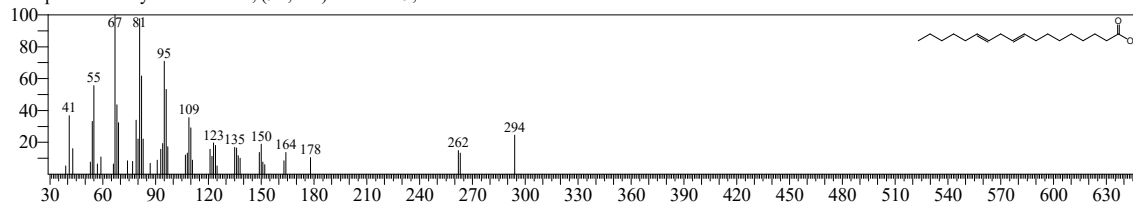

Hit#:4 Entry:11 Library:FA\_ME\_SP2560\_EI\_V3.lib

SI:52 Formula:C16H30O2 CAS:84743-29-3 MolWeight:254 RetIndex:2388

CompName:Methyl cis-10-pentadecenoate ; (Z)-pentadec-10-enoic acid

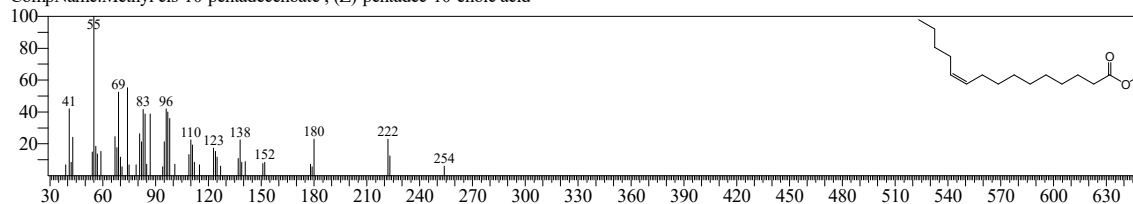

Hit#:5 Entry:27 Library:FA\_ME\_SP2560\_EI\_V3.lib

SI:52 Formula:C21H38O2 CAS:2091-39-6 MolWeight:322 RetIndex:2973

CompName:Methyl cis-11,14-Icosadienoate ; ; Icosa-11,14-dienoic acid

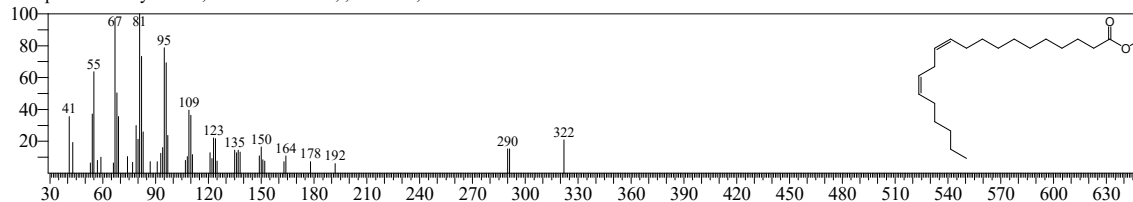

# TNAU

<< Target >>

Line#9 R.Time:18.080(Scan#:2617) MassPeaks:333

RawMode:Averaged 18.075-18.085(2616-2618) BasePeak:60.00(3643)

BG Mode:Calc. from Peak Group 1 - Event 1 Q3 Scan

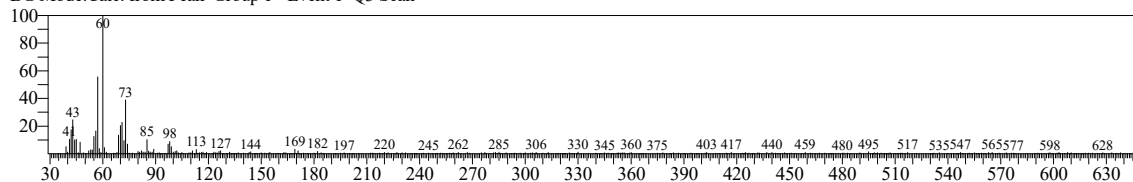

Hit#:1 Entry:13905 Library:NIST20R.lib

SI:91 Formula:C6H10O5 CAS:498-07-7 MolWeight:162 RetIndex:1404

CompName:.beta.-D-Glucopyranose, 1,6-anhydro- \$\$ Anhydro-d-mannosan \$\$ Levoglucosan \$\$ 1,6-Anhydro-.beta.-D-glucopyranose \$\$ 1,6-Anhydro-beta-

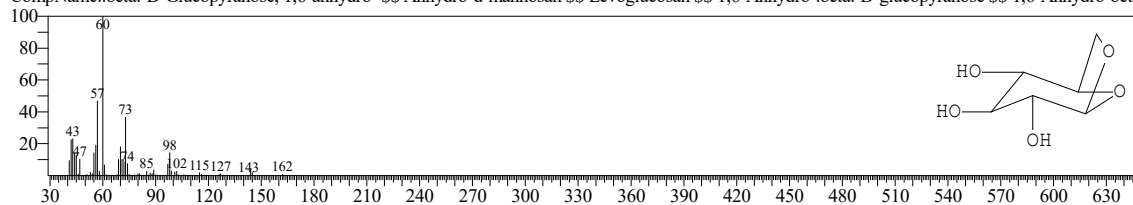

Hit#:2 Entry:36240 Library:NIST20M1.lib

SI:91 Formula:C6H12O6 CAS:2595-97-3 MolWeight:180 RetIndex:1698

CompName:D-Allose \$\$ .beta.-D-Allose \$\$ Hexose #

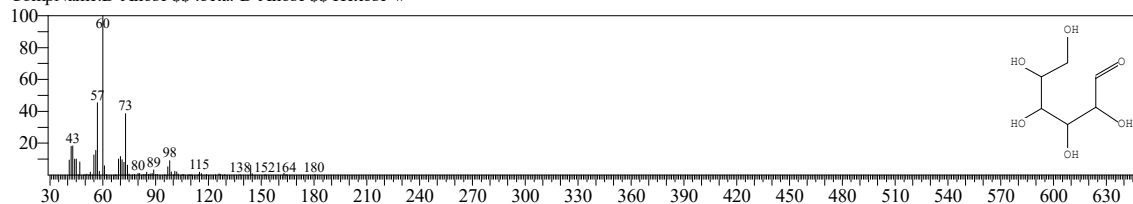

Hit#:3 Entry:23812 Library:NIST20M1.lib

SI:89 Formula:C6H10O5 CAS:0-00-0 MolWeight:162 RetIndex:1404

CompName:1,6-Anhydro-.beta.-d-talopyranose

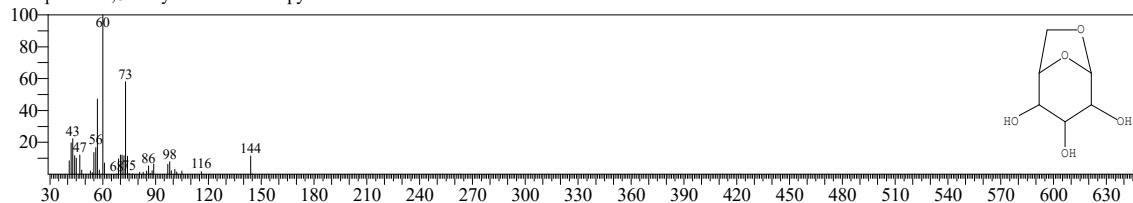

Hit#:4 Entry:23808 Library:NIST20M1.lib

SI:89 Formula:C6H10O5 CAS:0-00-0 MolWeight:162 RetIndex:1400

CompName:3,4-Altrosan \$\$ 3,4-Anhydrohexopyranose #

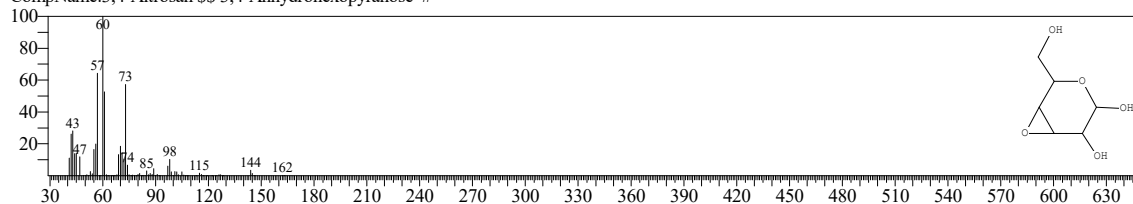

Hit#:5 Entry:9697 Library:NIST20M1.lib

SI:83 Formula:C5H10O4 CAS:14003-71-5 MolWeight:134 RetIndex:1352

CompName:1,2,3,4-Cyclopentanetetrol, (1.alpha.,2.beta.,3.beta.,4.alpha.)- \$\$ 1,2,3,4-Cyclopentanetetrol, stereoisomer \$\$ 1,2,3,4-Cyclopentanetetrol #

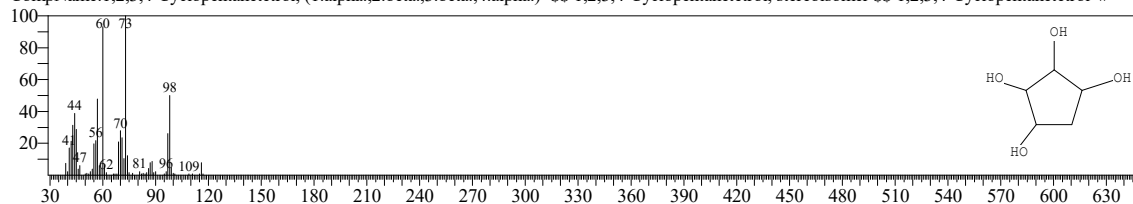

# TNAU

<< Target >>

Line#:10 R.Time:19.195(Scan#:2840) MassPeaks:290

RawMode:Averaged 19.190-19.200(2839-2841) BasePeak:263.15(4006)

BG Mode:Calc. from Peak Group 1 - Event 1 Q3 Scan

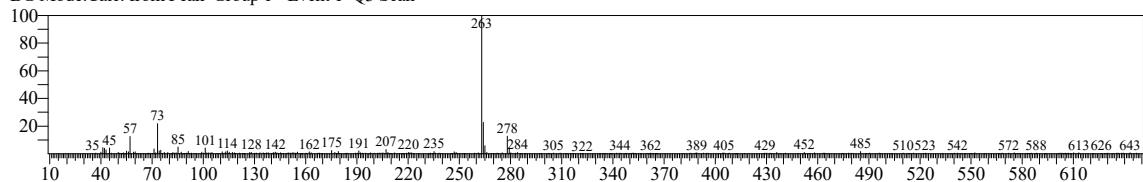

Hit#:1 Entry:33874 Library:NIST20R.lib

SI:85 Formula:C<sub>17</sub>H<sub>30</sub>O<sub>3</sub>Si CAS:53925-65-8 MolWeight:278 RetIndex:1632

CompName:2,4-Di-tert-butylphenoxytrimethylsilane \$\$\$\$ Benzene, 2,4-bis(1,1-dimethylethyl)-1-[(trimethylsilyl)oxy]- \$\$\$\$ Silane, [2,4-bis(1,1-dimethylethyl)ph

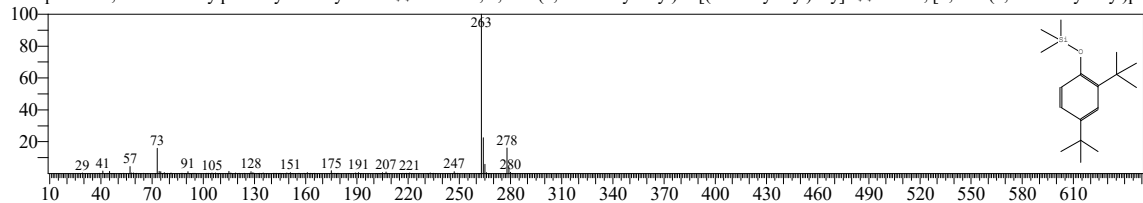

Hit#:2 Entry:33871 Library:NIST20R.lib

SI:78 Formula:C<sub>17</sub>H<sub>30</sub>O<sub>3</sub>Si CAS:10416-73-6 MolWeight:278 RetIndex:1632

CompName:2,6-Bis(tert-butyl)phenol, TMS derivative \$\$\$\$ Trimethyl(2,6 di-tert-butylphenoxy)silane \$\$\$\$ (2,6-Di-tert-butylphenoxy)(trimethyl)silane #

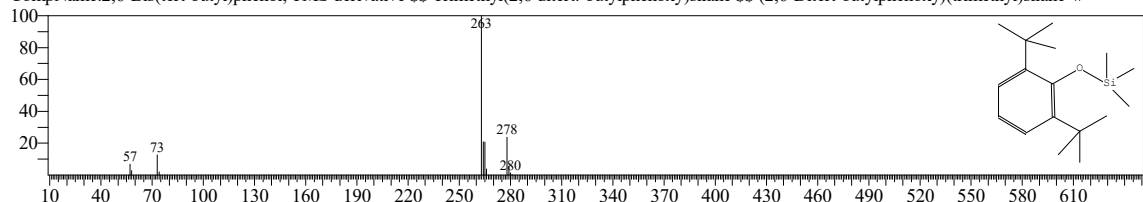

Hit#:3 Entry:136557 Library:NIST20M1.lib

SI:77 Formula:C<sub>12</sub>H<sub>22</sub>N<sub>4</sub>Si<sub>2</sub> CAS:0-00-0 MolWeight:278 RetIndex:1703

CompName:3-Deazaadenine, 2TMS \$\$\$\$ 3-Deazaadenine, N,N'-bis-TMS \$\$\$\$ 1H-Imidazo[4,5-c]pyridin-4-amine, N,N'-bis-TMS

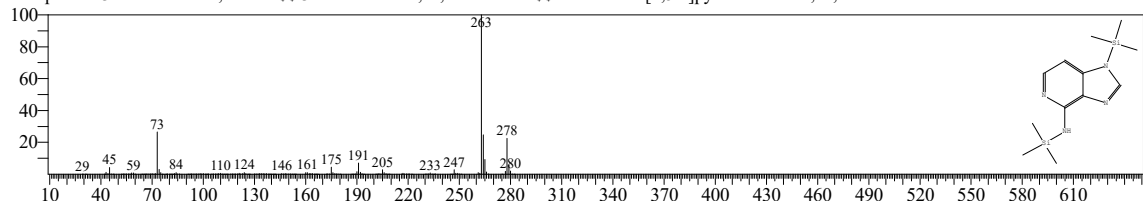

Hit#:4 Entry:137020 Library:NIST20M1.lib

SI:74 Formula:C<sub>15</sub>H<sub>22</sub>O<sub>3</sub>Si CAS:0-00-0 MolWeight:278 RetIndex:1736

CompName:6-Methoxy-2,2-dimethyl-2,3-dihydro-4H-chromen-4-one, TMS \$\$\$\$ 6-Methoxy-2,2-dimethyl-chroman-4-one, O-trimethylsilyl- \$\$\$\$ 4H-1-Benzopy

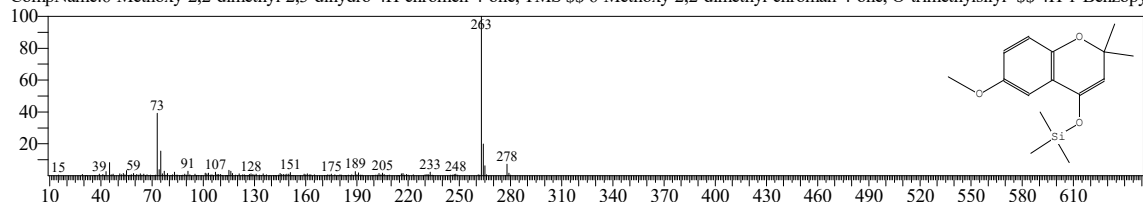

Hit#:5 Entry:136556 Library:NIST20M1.lib

SI:73 Formula:C<sub>12</sub>H<sub>22</sub>N<sub>4</sub>Si<sub>2</sub> CAS:0-00-0 MolWeight:278 RetIndex:1606

CompName:1H,1'H-2,2'-Biimidazole, 2TMS \$\$\$\$ 1H,1'H-2,2'-Biimidazole, N,N'-bis-TMS \$\$\$\$ 1H,1'H-[2,2']Biimidazolyl, 2TMS \$\$\$\$ 2,2'-Bi-1H-imidazole, 2TMS

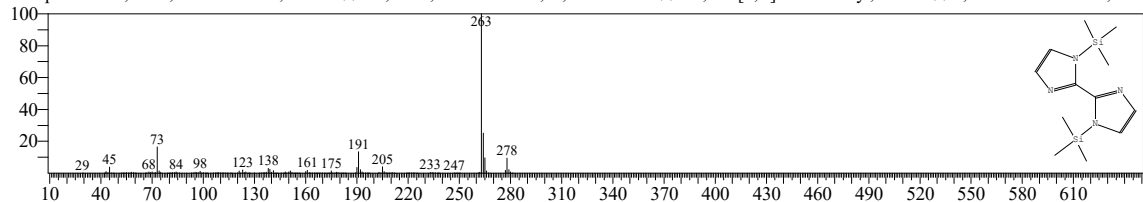

# TNAU

<< Target >>

Line#:11 R.Time:28.310(Scan#:4663) MassPeaks:345

RawMode:Averaged 28.305-28.315(4662-4664) BasePeak:73.05(7994)

BG Mode:Calc. from Peak Group 1 - Event 1 Q3 Scan

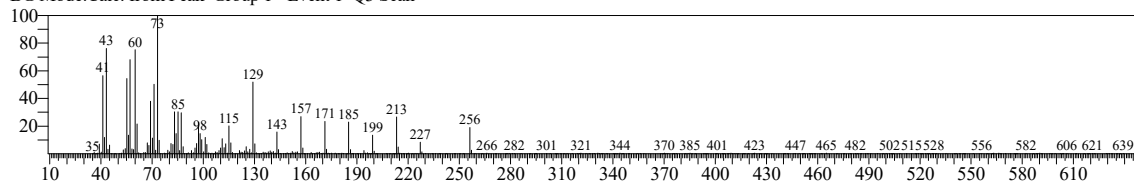

Hit#:1 Entry:31600 Library:NIST20R.lib

SI:95 Formula:C16H32O2 CAS:57-10-3 MolWeight:256 RetIndex:1968

CompName:n-Hexadecanoic acid \$ Hexadecanoic acid \$ n-Hexadecic acid \$ Palmitic acid \$ Pentadecanecarboxylic acid \$ 1-Pentadecanecarboxylic

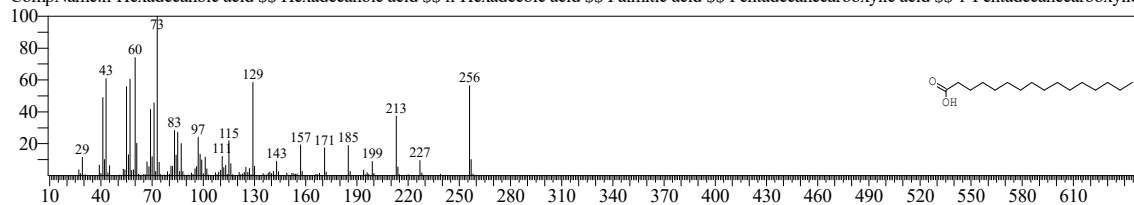

Hit#:2 Entry:29890 Library:NIST20R.lib

SI:92 Formula:C15H30O2 CAS:1002-84-2 MolWeight:242 RetIndex:1869

CompName:Pentadecanoic acid \$ Pentadecylic acid \$ n-Pentadecanoic acid \$ n-Pentadecylic acid

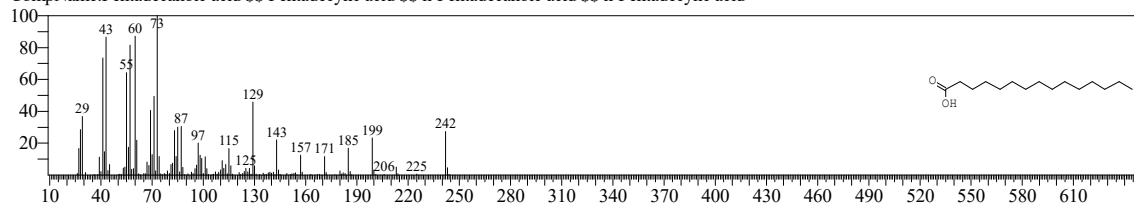

Hit#:3 Entry:44286 Library:NIST20M2.lib

SI:91 Formula:C38H68O8 CAS:28474-90-0 MolWeight:652 RetIndex:4765

CompName:l-(+)-Ascorbic acid 2,6-dihexadecanoate

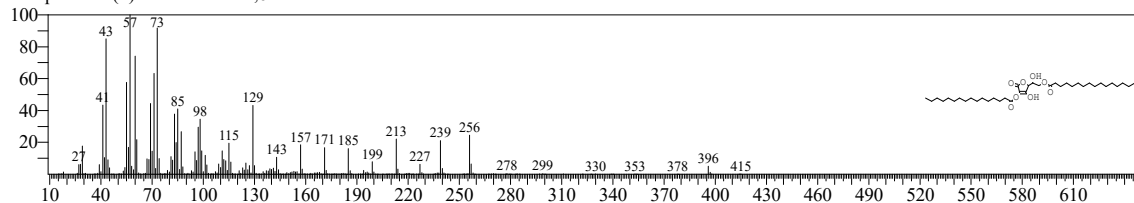

Hit#:4 Entry:25643 Library:NIST20R.lib

SI:90 Formula:C13H26O2 CAS:638-53-9 MolWeight:214 RetIndex:1670

CompName:Tridecanoic acid \$ n-Tridecanoic acid \$ n-Tridecoic acid \$ Tridecylic acid

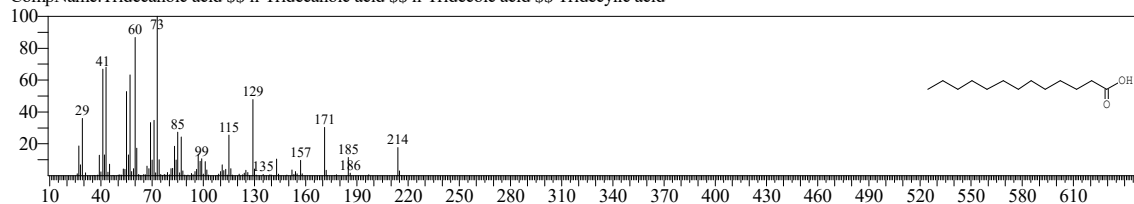

Hit#:5 Entry:144781 Library:NIST20M1.lib

SI:89 Formula:C18H36O2 CAS:57-11-4 MolWeight:284 RetIndex:2167

CompName:Octadecanoic acid \$ Stearic acid \$ n-Octadecanoic acid \$ Humko Industriene R \$ Hydrofol Acid 150 \$ Hystrene S-97 \$ Hystrene T-70 \$

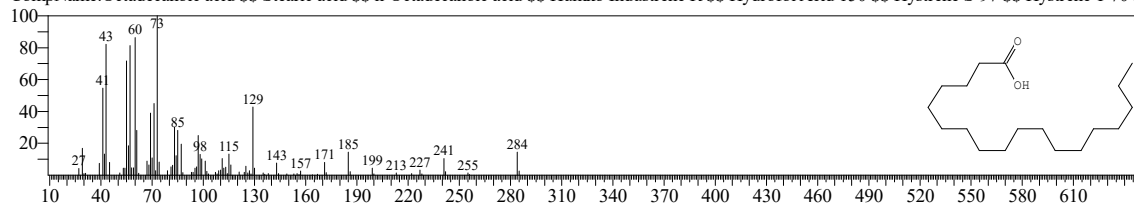

# TNAU

<< Target >>

Line#:12 R.Time:31.485(Scan#:5298) MassPeaks:354

RawMode:Averaged 31.480-31.490(5297-5299) BasePeak:67.05(5545)

BG Mode:Calc. from Peak Group 1 - Event 1 Q3 Scan

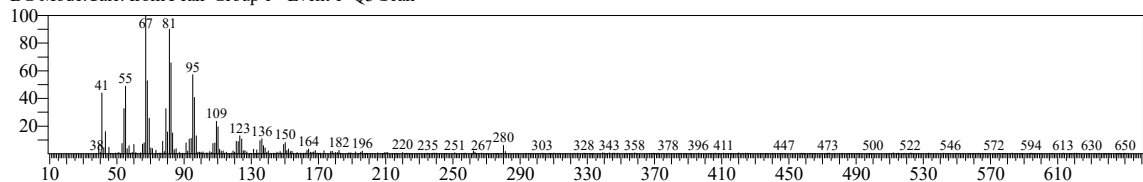

Hit#:1 Entry:34035 Library:NIST20R.lib

SI:95 Formula:C18H32O2 CAS:60-33-3 MolWeight:280 RetIndex:2183

CompName:9,12-Octadecadienoic acid (Z,Z)- \$\$ cis-9,cis-12-Octadecadienoic acid \$\$ cis,cis-Linoleic acid \$\$ Grape seed oil \$\$ Linoleic acid \$

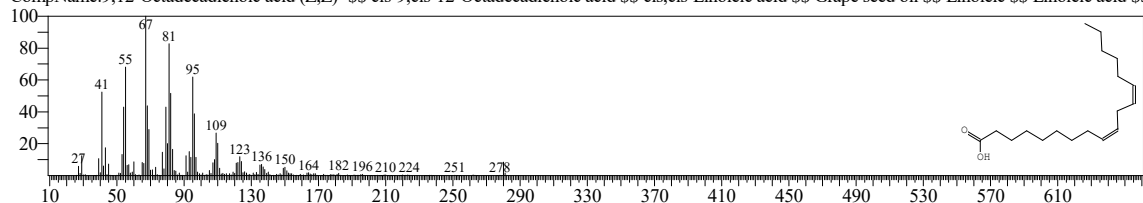

Hit#:2 Entry:139646 Library:NIST20M1.lib

SI:94 Formula:C18H32O2 CAS:2420-56-6 MolWeight:280 RetIndex:2183

CompName:10E,12Z-Octadecadienoic acid

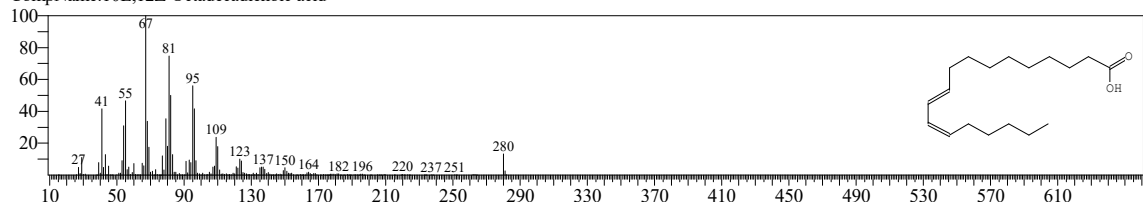

Hit#:3 Entry:139651 Library:NIST20M1.lib

SI:94 Formula:C18H32O2 CAS:544-71-8 MolWeight:280 RetIndex:2183

CompName:(9E,11E)-Octadecadienoic acid

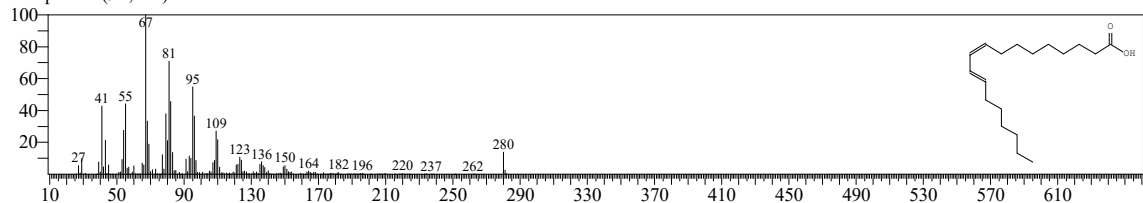

Hit#:4 Entry:139661 Library:NIST20M1.lib

SI:93 Formula:C18H32O2 CAS:506-21-8 MolWeight:280 RetIndex:2183

CompName:Linoelaidic acid

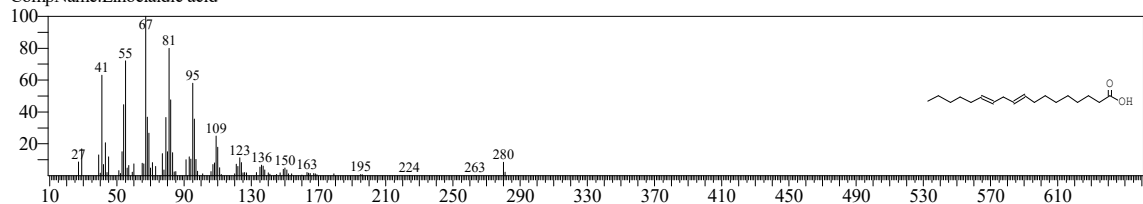

Hit#:5 Entry:173215 Library:NIST20M1.lib

SI:93 Formula:C20H36O2 CAS:2091-39-6 MolWeight:308 RetIndex:2382

CompName:11,14-Eicosadienoic acid

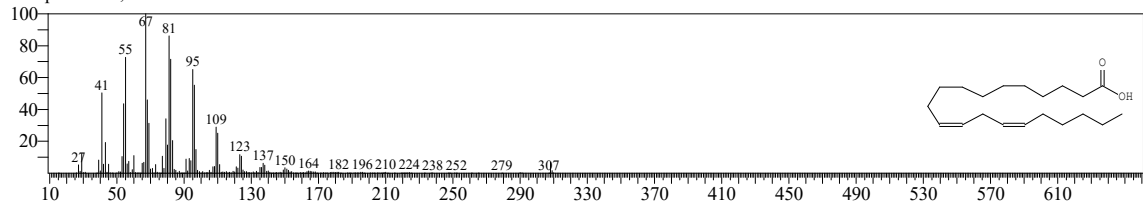

# TNAU

<< Target >>

Line#:13 R.Time:31.595(Scan#:5320) MassPeaks:450

RawMode:Averaged 31.590-31.600(5319-5321) BasePeak:55.05(2940)

BG Mode:Calc. from Peak Group 1 - Event 1 Q3 Scan

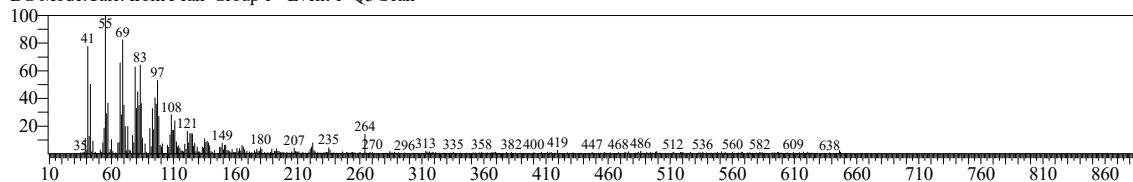

Hit#:1 Entry:92244 Library:NIST20M1.lib

SI:89 Formula:C16H30O CAS:56219-04-6 MolWeight:238 RetIndex:1808

CompName:cis-9-Hexadecenal \$\$ 9-Hexadecenal, (Z)- \$\$ (Z)-9-Hexadecenal \$\$ Z-9-Hexadecenal \$\$ (9Z)-9-Hexadecenal #

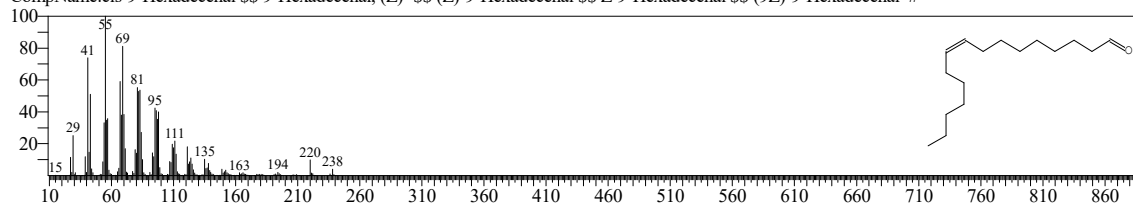

Hit#:2 Entry:63176 Library:NIST20M1.lib

SI:88 Formula:C14H26O CAS:65128-96-3 MolWeight:210 RetIndex:1609

CompName:7-Tetradecenal, (Z)- \$\$ Z-7-Tetradecenal \$\$ (7Z)-7-Tetradecenal #

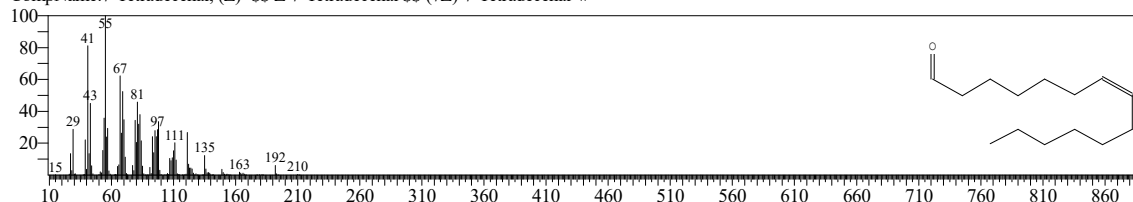

Hit#:3 Entry:123421 Library:NIST20M1.lib

SI:88 Formula:C18H34O CAS:2423-10-1 MolWeight:266 RetIndex:2007

CompName:9-Octadecenal, (Z)- \$\$ Olealdehyde \$\$ cis-9-Octadecenal \$\$ Oleylaldehyde \$\$ Z-9-Octadecenal \$\$ (9Z)-9-Octadecenal #

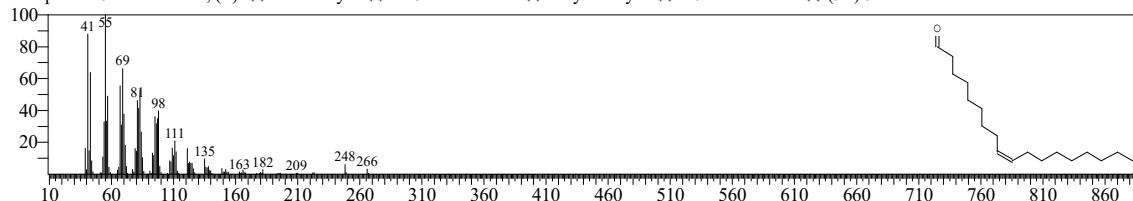

Hit#:4 Entry:46357 Library:NIST20M2.lib

SI:88 Formula:C57H104O6 CAS:537-39-3 MolWeight:884 RetIndex:6149

CompName:9-Octadecenoic acid, 1,2,3-propanetriyl ester, (E,E,E)- \$\$ 2,3-Bis[(9E)-9-octadecenoyloxy]propyl (9E)-9-octadecenoate #

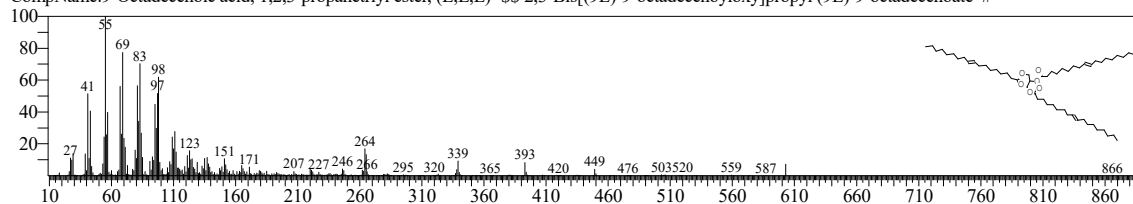

Hit#:5 Entry:92227 Library:NIST20M1.lib

SI:88 Formula:C16H30O CAS:56797-40-1 MolWeight:238 RetIndex:1808

CompName:7-Hexadecenal, (Z)- \$\$ (Z)-7-Hexadecenal \$\$ Z-7-Hexadecenal \$\$ (7Z)-7-Hexadecenal #

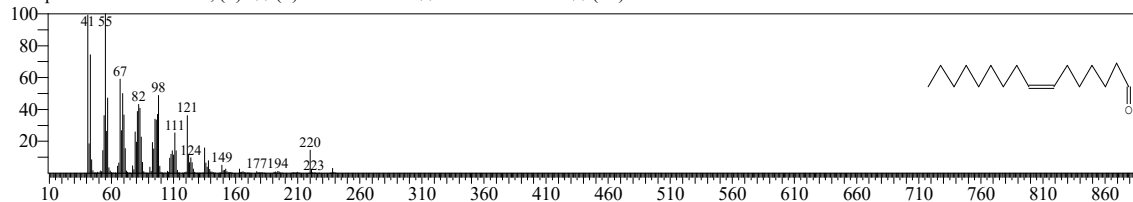

# TNAU

<< Target >>

Line#:14 R.Time:32.040(Scan#:5409) MassPeaks:340

RawMode:Averaged 32.035-32.045(5408-5410) BasePeak:43.10(507)

BG Mode:Calc. from Peak Group 1 - Event 1 Q3 Scan

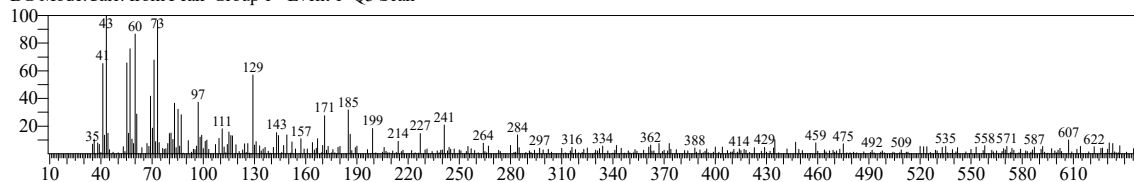

Hit#:1 Entry:34462 Library:NIST20R.lib

SI:83 Formula:C18H36O2 CAS:57-11-4 MolWeight:284 RetIndex:2167

CompName:Octadecanoic acid \$\$ Stearic acid \$\$ n-Octadecanoic acid \$\$ Humko Industriene R \$\$ Hydrofol Acid 150 \$\$ Hystrene S-97 \$\$ Hystrene T-70 \$

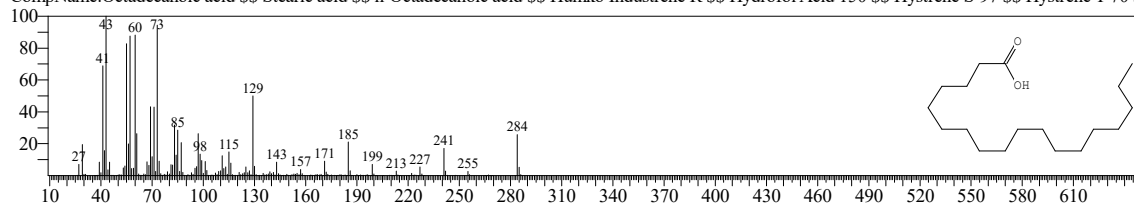

Hit#:2 Entry:31599 Library:NIST20R.lib

SI:81 Formula:C16H32O2 CAS:57-10-3 MolWeight:256 RetIndex:1968

CompName:n-Hexadecanoic acid \$\$ Hexadecanoic acid \$\$ n-Hexadecic acid \$\$ Palmitic acid \$\$ Pentadecanecarboxylic acid \$\$ 1-Pentadecanecarboxylic

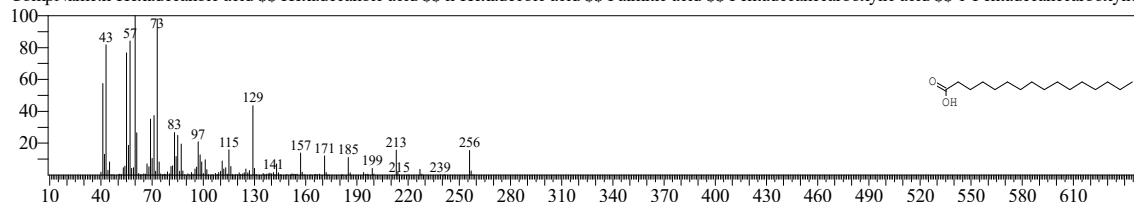

Hit#:3 Entry:29890 Library:NIST20R.lib

SI:81 Formula:C15H30O2 CAS:1002-84-2 MolWeight:242 RetIndex:1869

CompName:Pentadecanoic acid \$\$ Pentadecylic acid \$\$ n-Pentadecanoic acid \$\$ n-Pentadecylic acid

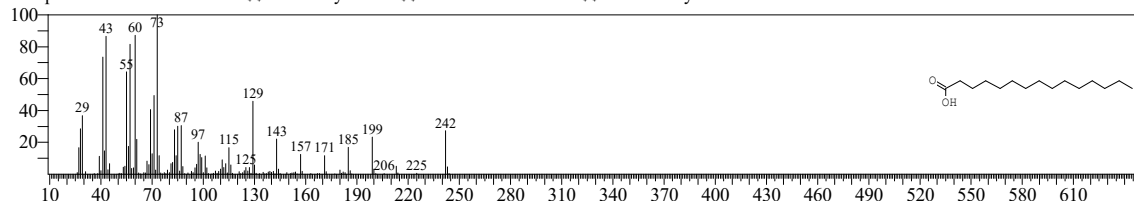

Hit#:4 Entry:44286 Library:NIST20M2.lib

SI:80 Formula:C38H68O8 CAS:28474-90-0 MolWeight:652 RetIndex:4765

CompName:l-(+)-Ascorbic acid 2,6-dihexadecanoate

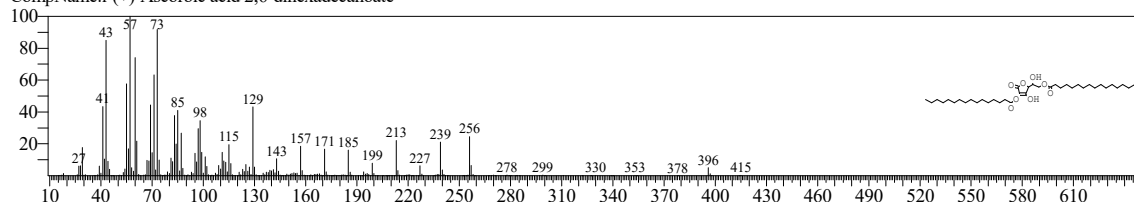

Hit#:5 Entry:81713 Library:NIST20M1.lib

SI:80 Formula:C14H28O2 CAS:544-63-8 MolWeight:228 RetIndex:1769

CompName:Tetradecanoic acid \$\$ Myristic acid \$\$ n-Tetradecanoic acid \$\$ n-Tetradecic acid \$\$ Neo-Fat 14 \$\$ Univol U 316S \$\$ 1-Tridecanecarboxylic ;

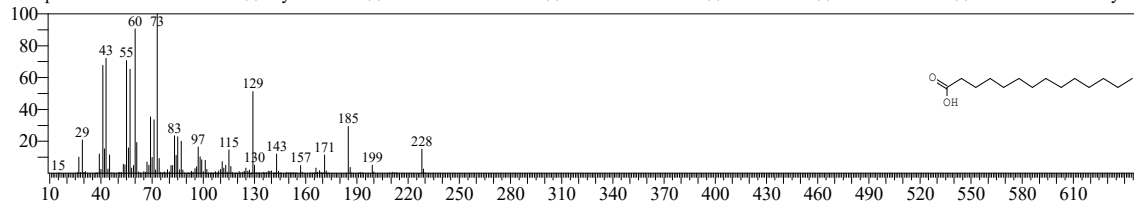

# TNAU

<< Target >>

Line#:15 R.Time:45.610(Scan#:8123) MassPeaks:448

RawMode:Averaged 45.605-45.615(8122-8124) BasePeak:139.10(6764)

BG Mode:Calc. from Peak Group 1 - Event 1 Q3 Scan

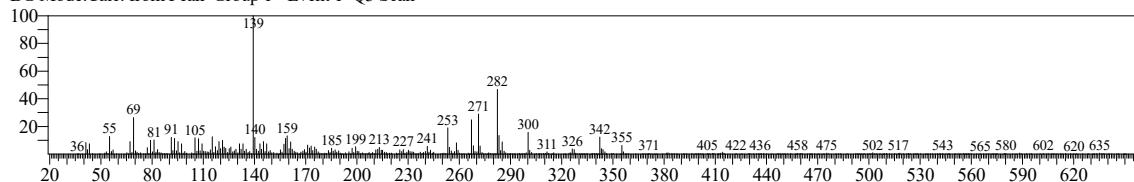

Hit#:1 Entry:8297 Library:NIST20M2.lib

SI:90 Formula:C27H42O3 CAS:512-04-9 MolWeight:414 RetIndex:2844

CompName:Diosgenin \$\$ Spirost-5-en-3-ol, (3.beta.,25R)- \$\$ Spirost-5-en-3.beta.-ol, (25R)- \$\$ Nitrogenin \$\$ 25D-spirost-5-en-3.beta.-ol \$\$ Spiro(8H-nap

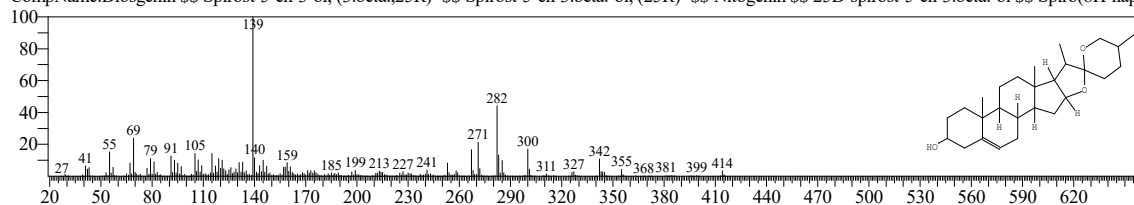

Hit#:2 Entry:14852 Library:NIST20M2.lib

SI:82 Formula:C28H44O3 CAS:116292-24-1 MolWeight:428 RetIndex:2793

CompName:Diosgenin methyl ether \$\$ Diosgenin Me derivative \$\$ (3.beta.,25R)-3-Methoxyspirost-5-ene \$\$ Spirost-5-ene, 3-methoxy-, (3.beta.,25R)-

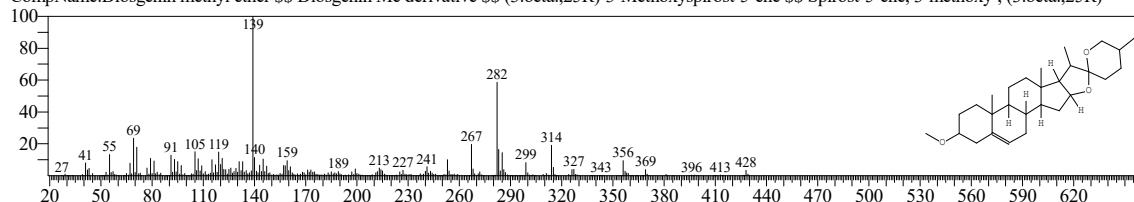

Hit#:3 Entry:41561 Library:NIST20R.lib

SI:80 Formula:C27H42O2 CAS:32277-73-9 MolWeight:398 RetIndex:2713

CompName:Des-N-solasodine \$\$ Furosta-5,20(22)-dien-3-ol #

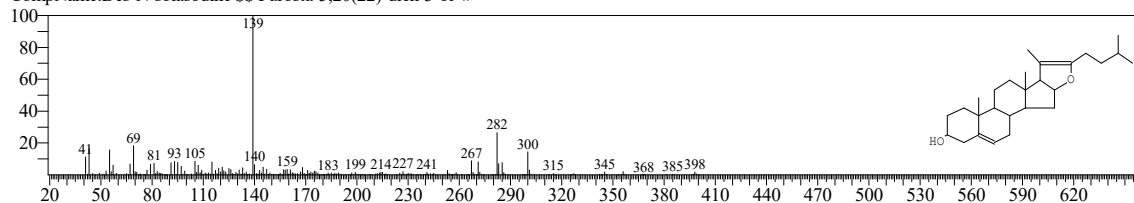

Hit#:4 Entry:24878 Library:NIST20M2.lib

SI:80 Formula:C29H44O4 CAS:1061-54-7 MolWeight:456 RetIndex:2984

CompName:Spirost-5-en-3-ol, acetate, (3.beta.,25R)- \$\$ Diosgenin acetate \$\$ Spirost-5-en-3.beta.-ol, acetate, (25R)- \$\$ Spirost-5-en-3.beta.-ol, acetate, (2

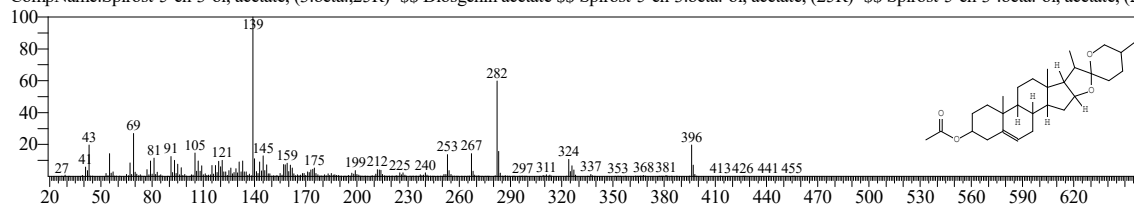

Hit#:5 Entry:42677 Library:NIST20R.lib

SI:75 Formula:C29H44O4 CAS:1180-12-7 MolWeight:456 RetIndex:2984

CompName:Neodiosgenin (3.beta.,25S) acetate \$\$ Spirost-5-en-3-ol, 3-acetate, (3.beta.,25S)- \$\$ Spirost-5-en-3-ol, acetate, (3.beta.,25S)- \$\$ Spirost-5-en-3

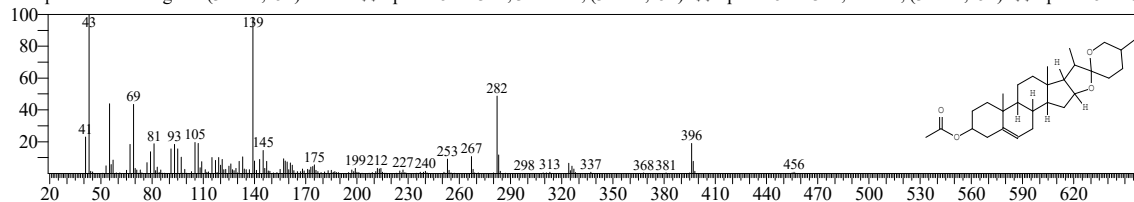

Supplement: Supplementary file 52 [file supplementary]
