# Supplementary material for: Comparative Metabolomics Profiling Reveals Key Metabolites and Associated Pathways Regulating Tuber Dormancy in White Yam (<em>Dioscorea rotundata</em>)
Source: Preprints.org preprint supplement (doi:10.20944/preprints202303.0378.v1), 2023-03-21

# TNAU

## Sample Information

Analyzed by : Admin  
 Analyzed : 05-Aug-22 8:29:37 AM  
 Sample Type : Unknown  
 Level # : 1  
 Sample Name : T56-1  
 Sample ID : T56-1  
 IS Amount : [1]=1  
 Sample Amount : 1  
 Dilution Factor : 1  
 Vial # : 24  
 Injection Volume : 1.00  
 Data File : D:\GCMS-8040NX\Aug 2022\Users\04.08.2022\Data files\04082022-025.qgd  
 Org Data File : D:\GCMS-8040NX\Aug 2022\Users\04.08.2022\Data files\04082022-025.qgd  
 Method File : D:\GCMS-8040NX\Aug 2022\Users\04.08.2022\Method file\27072022\_methodfile.qgm  
 Org Method File : D:\GCMS-8040NX\Aug 2022\Users\04.08.2022\Method file\27072022\_methodfile.qgm  
 Report File :  
 Tuning File : D:\GCMS-8040NX\Aug 2022\Tuning Data\TUNING 04082022.qgt  
 [Comment]  
 Jerry samples  
 Modified by : Admin  
 Modified : 05-Aug-22 4:43:38 PM

Chromatogram T56-1 D:\GCMS-8040NX\Aug 2022\Users\04.08.2022\Data files\04082022-025.qgd

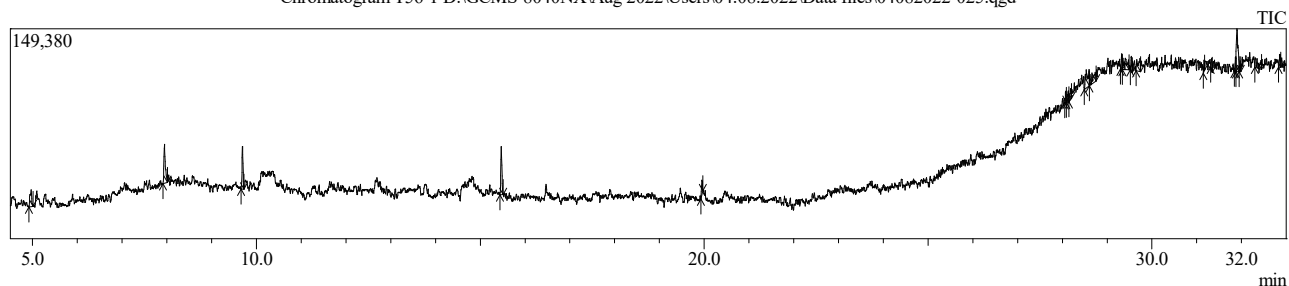

Peak Report TIC

| Peak# | R.Time | Area   | Area%  | Height | Height% | A/H  | Similarity | Name                            |
|-------|--------|--------|--------|--------|---------|------|------------|---------------------------------|
| 1     | 4.968  | 31241  | 5.28   | 11972  | 4.40    | 2.61 | 70         | 3,3-Dimethoxy-2-butanone        |
| 2     | 7.945  | 61151  | 10.33  | 27794  | 10.22   | 2.20 | 88         | Decane                          |
| 3     | 9.688  | 48897  | 8.26   | 30115  | 11.07   | 1.62 | 88         | Undecane                        |
| 4     | 15.467 | 56927  | 9.61   | 34223  | 12.58   | 1.66 | 91         | 2,4-Di-tert-butylphenol         |
| 5     | 19.948 | 16537  | 2.79   | 10342  | 3.80    | 1.60 | 41         | Glycerol-3TMS                   |
| 6     | 28.074 | 8019   | 1.35   | 8012   | 2.95    | 1.00 | 30         | 3,4-Dihydroxymandelic acid-4TMS |
| 7     | 28.135 | 11539  | 1.95   | 7651   | 2.81    | 1.51 | 38         | 3-Hydroxyanthranilic acid-2TMS  |
| 8     | 28.185 | 12028  | 2.03   | 7604   | 2.80    | 1.58 | 33         | 3,4-Dihydroxymandelic acid-4TMS |
| 9     | 28.594 | 53408  | 9.02   | 11902  | 4.38    | 4.49 | 34         | Mannose-5TMS(1)                 |
| 10    | 28.660 | 36590  | 6.18   | 7875   | 2.90    | 4.65 | 33         | Hypoxanthine-2TMS               |
| 11    | 29.325 | 11493  | 1.94   | 10986  | 4.04    | 1.05 | 38         | 3-Hydroxyanthranilic acid-3TMS  |
| 12    | 29.406 | 41482  | 7.00   | 8006   | 2.94    | 5.18 | 41         | 3-Hydroxyphenylacetic acid-2TMS |
| 13    | 29.539 | 13418  | 2.27   | 10475  | 3.85    | 1.28 | 32         | Batyl alcohol-2TMS              |
| 14    | 29.732 | 32258  | 5.45   | 9091   | 3.34    | 3.55 | 35         | 3,4-Dihydroxymandelic acid-4TMS |
| 15    | 31.165 | 6631   | 1.12   | 8045   | 2.96    | 0.82 | 36         | 3-Hydroxyanthranilic acid-2TMS  |
| 16    | 31.325 | 7611   | 1.29   | 6699   | 2.46    | 1.14 | 38         | 3,4-Dihydroxymandelic acid-4TMS |
| 17    | 31.860 | 13677  | 2.31   | 7973   | 2.93    | 1.72 | 36         | 3,4-Dihydroxymandelic acid-4TMS |
| 18    | 31.900 | 80074  | 13.52  | 30340  | 11.15   | 2.64 | 28         | 4-Hydroxybenzoic acid-2TMS      |
| 19    | 31.970 | 8131   | 1.37   | 7699   | 2.83    | 1.06 | 35         | Anthranilic acid-2TMS           |
| 20    | 32.305 | 27041  | 4.57   | 6114   | 2.25    | 4.42 | 28         | 3,4-Dihydroxymandelic acid-4TMS |
| 21    | 32.852 | 14031  | 2.37   | 9092   | 3.34    | 1.54 | 33         | 3,4-Dihydroxymandelic acid-4TMS |
|       |        | 592184 | 100.00 | 272010 | 100.00  |      |            |                                 |

# TNAU

Library

<< Target >>

Line#:1 R.Time:4.970(Scan#:95) MassPeaks:254

RawMode:Averaged 4.965-4.975(94-96) BasePeak:89.05(3336)

BG Mode:Calc. from Peak Group 1 - Event 1 Q3 Scan

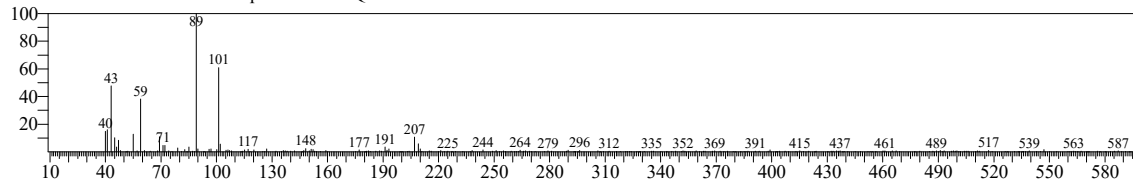

Hit#:1 Entry:9263 Library:NIST20M1.lib

SI:70 Formula:C6H12O3 CAS:21983-72-2 MolWeight:132 RetIndex:821

CompName:3,3-Dimethoxy-2-butanone

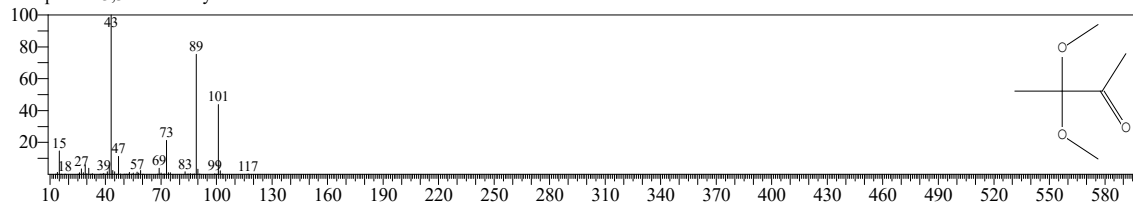

Hit#:2 Entry:1 Library:FA\_ME\_SP2560\_EI\_V3.lib

SI:52 Formula:C5H10O2 CAS:107-92-6 MolWeight:102 RetIndex:1113

CompName:Methyl butanoate ; Butanoic acid

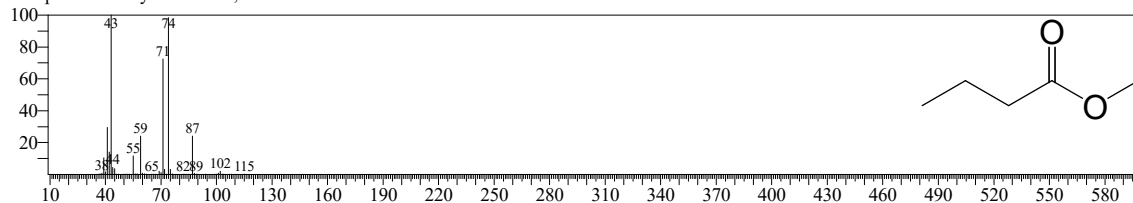

Hit#:3 Entry:35 Library:OA\_TMS\_DB5\_67min\_V3.lib

SI:40 Formula:C10H24O3Si2 CAS:300-85-6 MolWeight:248 RetIndex:1161

CompName:3-Hydroxybutyric acid-2TMS ; 3-hydroxybutanoic acid

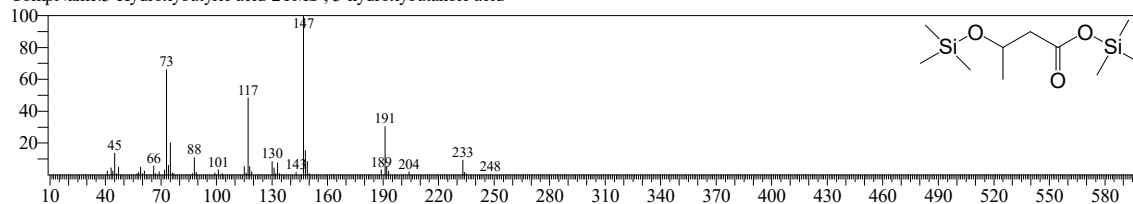

Hit#:4 Entry:456 Library:OA\_TMS\_DB5\_67min\_V3.lib

SI:40 Formula:C18H33NO3Si CAS:37350-58-6 MolWeight:339 RetIndex:2094

CompName:Metoprolol-TMS ; 1-[4-(2-methoxyethyl)phenoxy]-3-(propan-2-ylamino)propan-2-ol

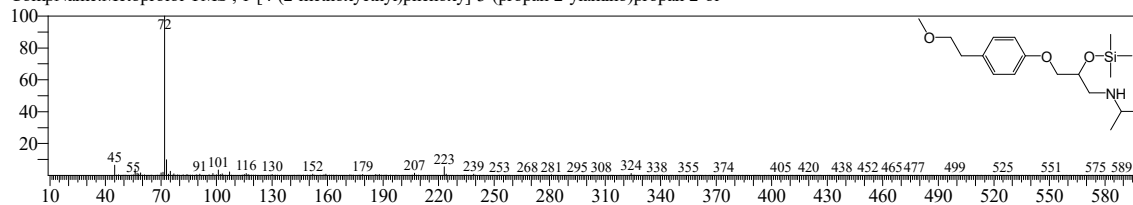

Hit#:5 Entry:92 Library:OA\_TMS\_DB5\_67min\_V3.lib

SI:38 Formula:C10H22O4Si2 CAS:110-15-6 MolWeight:262 RetIndex:1313

CompName:Succinic acid-2TMS ; butanedioic acid

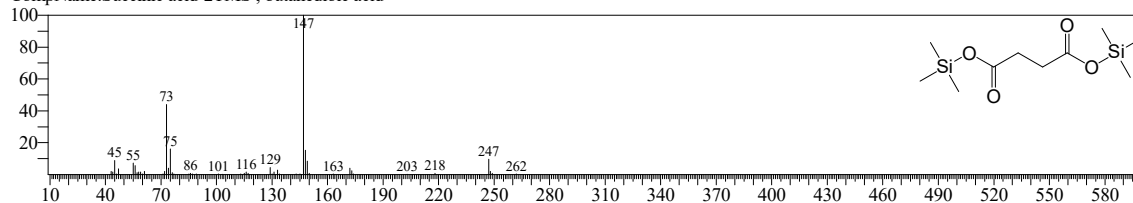

# TNAU

<< Target >>

Line#:2 R.Time:7.945(Scan#:690) MassPeaks:303

RawMode:Averaged 7.940-7.950(689-691) BasePeak:57.10(6400)

BG Mode:Calc. from Peak Group 1 - Event 1 Q3 Scan

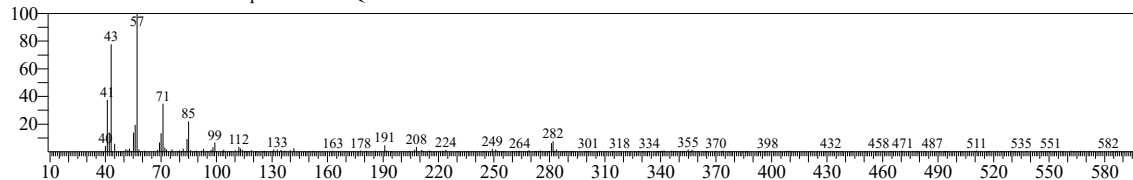

Hit#:1 Entry:9444 Library:NIST20R.lib

SI:88 Formula:C10H22 CAS:124-18-5 MolWeight:142 RetIndex:1000

CompName:Decane \$\$ n-Decane \$\$ n-C10H22 \$\$ UN 2247

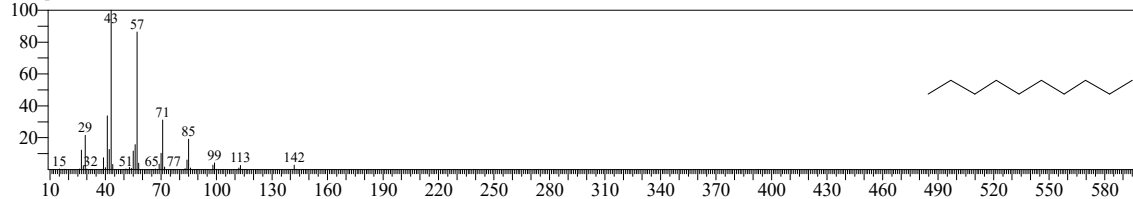

Hit#:2 Entry:12897 Library:NIST20R.lib

SI:88 Formula:C11H24 CAS:1120-21-4 MolWeight:156 RetIndex:1100

CompName:Undecane \$\$ n-Undecane \$\$ Hendecane \$\$ n-C11H24 \$\$ UN 2330

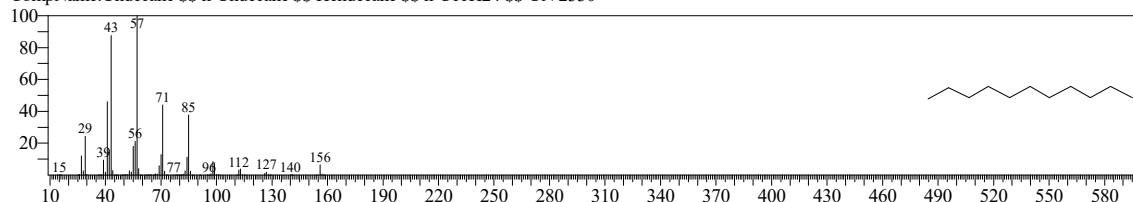

Hit#:3 Entry:40226 Library:NIST20M1.lib

SI:87 Formula:C13H28 CAS:629-50-5 MolWeight:184 RetIndex:1300

CompName:Tridecane \$\$ n-Tridecane \$\$ Tridecane, n-

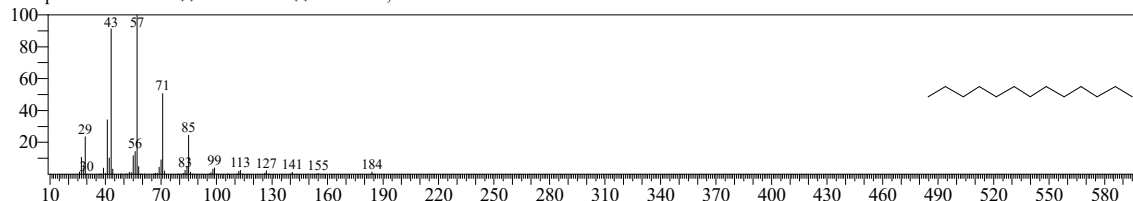

Hit#:4 Entry:30057 Library:NIST20M1.lib

SI:87 Formula:C12H26 CAS:112-40-3 MolWeight:170 RetIndex:1200

CompName:Dodecane \$\$ n-Dodecane \$\$ Adakane 12 \$\$ Ba 51-090453 \$\$ CH3(CH2)10CH3 \$\$ Bihexyl \$\$ Dihexyl \$\$ Duodecane \$\$ NSC 8714

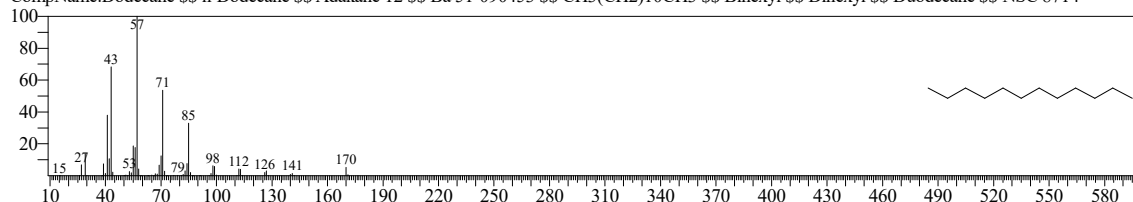

Hit#:5 Entry:9458 Library:NIST20R.lib

SI:87 Formula:C10H22 CAS:15869-86-0 MolWeight:142 RetIndex:951

CompName:Octane, 4-ethyl- \$\$ 4-Ethyloctane

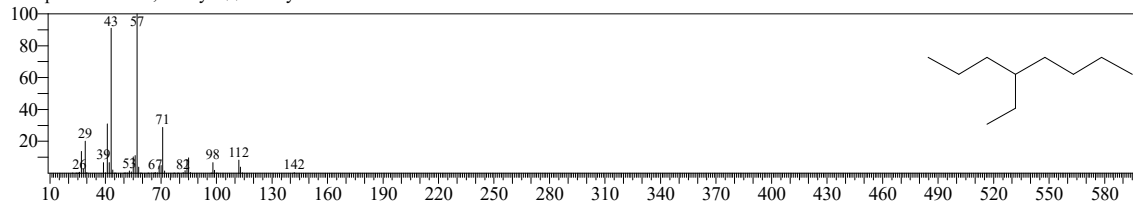

# TNAU

<< Target >>

Line#3 R.Time:9.685(Scan#:1038) MassPeaks:382

RawMode:Averaged 9.680-9.690(1037-1039) BasePeak:57.05(5553)

BG Mode:Calc. from Peak Group 1 - Event 1 Q3 Scan

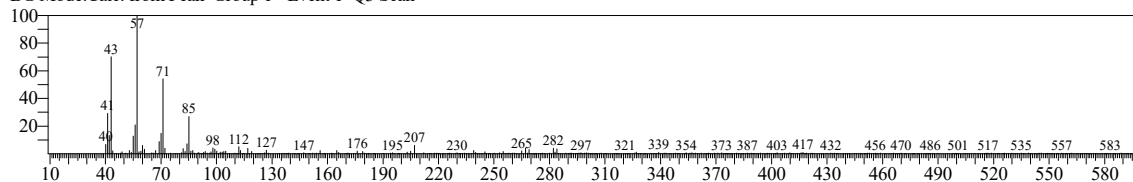

Hit#:1 Entry:21042 Library:NIST20M1.lib

SI:88 Formula:C11H24 CAS:1120-21-4 MolWeight:156 RetIndex:1100

CompName:Undecane \$\$ n-Undecane \$\$ Hendecane \$\$ n-C11H24 \$\$ UN 2330

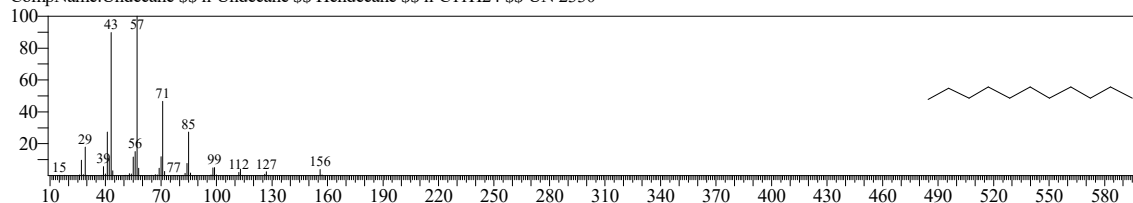

Hit#:2 Entry:30057 Library:NIST20M1.lib

SI:88 Formula:C12H26 CAS:112-40-3 MolWeight:170 RetIndex:1200

CompName:Dodecane \$\$ n-Dodecane \$\$ Adakane 12 \$\$ Ba 51-090453 \$\$ CH3(CH2)10CH3 \$\$ Bihexyl \$\$ Dihexyl \$\$ Duodecane \$\$ NSC 8714

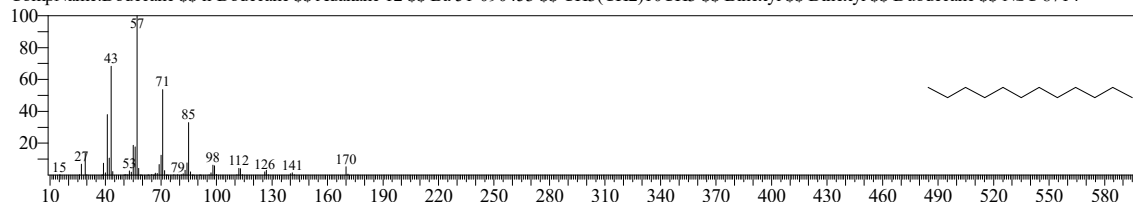

Hit#:3 Entry:40226 Library:NIST20M1.lib

SI:87 Formula:C13H28 CAS:629-50-5 MolWeight:184 RetIndex:1300

CompName:Tridecane \$\$ n-Tridecane \$\$ Tridecane, n-



Hit#:4 Entry:25291 Library:NIST20R.lib

SI:87 Formula:C15H32 CAS:31295-56-4 MolWeight:212 RetIndex:1320

CompName:Dodecane, 2,6,11-trimethyl- \$\$ 2,6,11-Trimethyldodecane

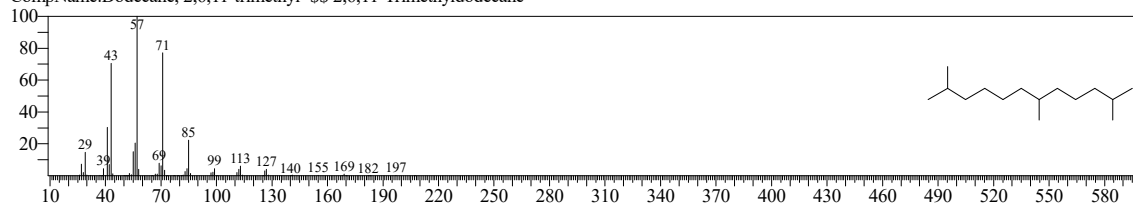

Hit#:5 Entry:27737 Library:NIST20R.lib

SI:87 Formula:C16H34 CAS:544-76-3 MolWeight:226 RetIndex:1600

CompName:Hexadecane \$\$ n-Cetane \$\$ n-Hexadecane \$\$ Cetane

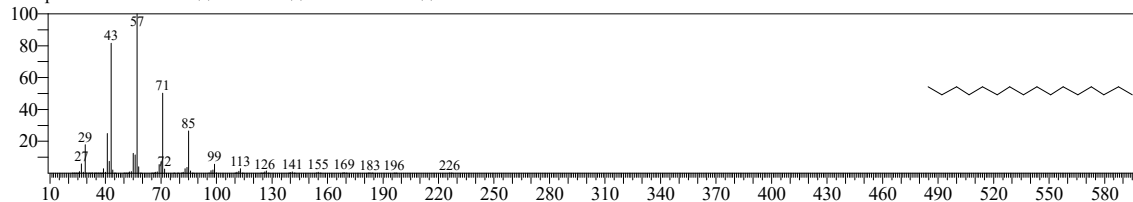

# TNAU

<< Target >>

Line#4 R.Time:15.465(Scan#:2194) MassPeaks:286

RawMode:Averaged 15.460-15.470(2193-2195) BasePeak:191.10(10416)

BG Mode:Calc. from Peak Group 1 - Event 1 Q3 Scan

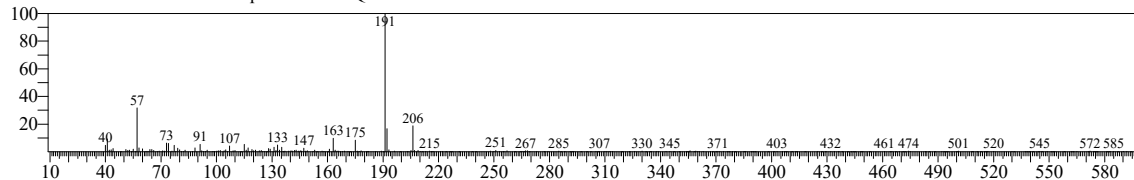

Hit#1 Entry:59048 Library:NIST20M1.lib

SI:91 Formula:C<sub>14</sub>H<sub>22</sub>O CAS:96-76-4 MolWeight:206 RetIndex:1555

CompName:2,4-Di-tert-butylphenol \$\$ Phenol, 2,4-bis(1,1-dimethylethyl)- \$\$ Phenol, 2,4-di-tert-butyl- \$\$ 2,4-di-t-Butylphenol \$\$ 1-Hydroxy-2,4-di-tert-bu

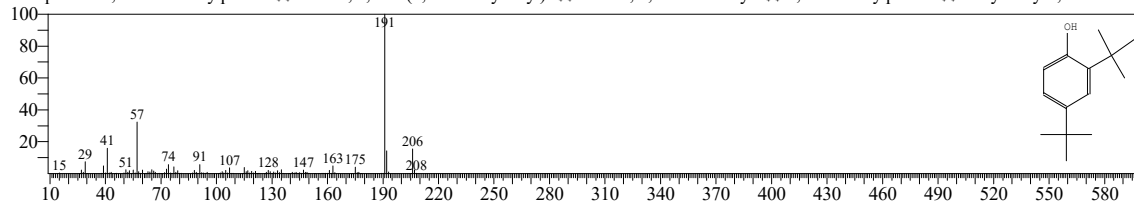

Hit#2 Entry:59031 Library:NIST20M1.lib

SI:90 Formula:C<sub>14</sub>H<sub>22</sub>O CAS:128-39-2 MolWeight:206 RetIndex:1555

CompName:Phenol, 2,6-bis(1,1-dimethylethyl)- \$\$ Phenol, 2,6-di-tert-butyl- \$\$ 2,6-Bis(tert-butyl)phenol \$\$ 2,6-Bis(1,1-dimethylethyl)phenol \$\$ 2,6-Di-ter

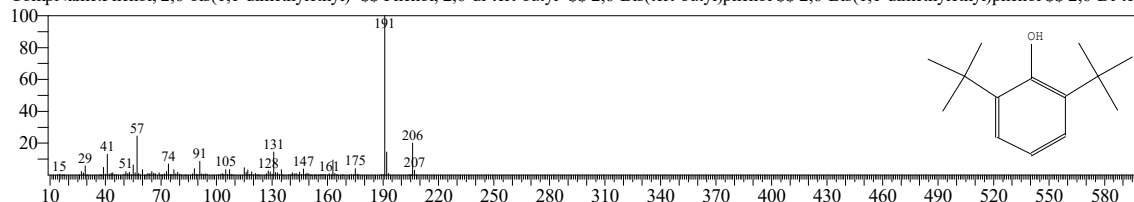

Hit#3 Entry:24098 Library:NIST20R.lib

SI:88 Formula:C<sub>14</sub>H<sub>22</sub>O CAS:5875-45-6 MolWeight:206 RetIndex:1555

CompName:Phenol, 2,5-bis(1,1-dimethylethyl)- \$\$ Phenol, 2,5-di-tert-butyl- \$\$ 2,5-Di-tert-butylphenol \$\$ 2,5-bis(1,1-Dimethylethyl)phenol

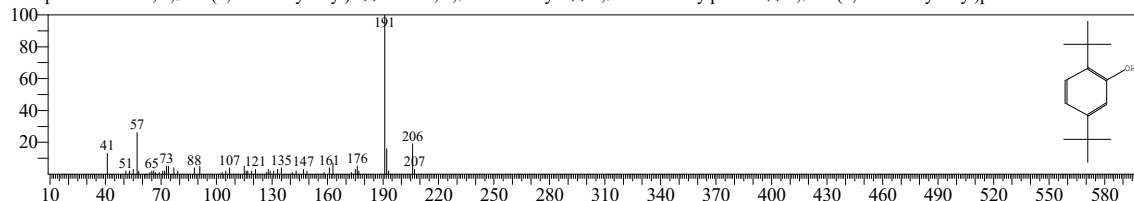

Hit#4 Entry:24110 Library:NIST20R.lib

SI:88 Formula:C<sub>14</sub>H<sub>22</sub>O CAS:1138-52-9 MolWeight:206 RetIndex:1555

CompName:Phenol, 3,5-bis(1,1-dimethylethyl)- \$\$ Phenol, 3,5-di-tert-butyl- \$\$ 3,5-Di-tert-butylphenol \$\$ Phenol, 3,5-bis(t-butyl) \$\$ 3,5-Di-t-butylphenol \$

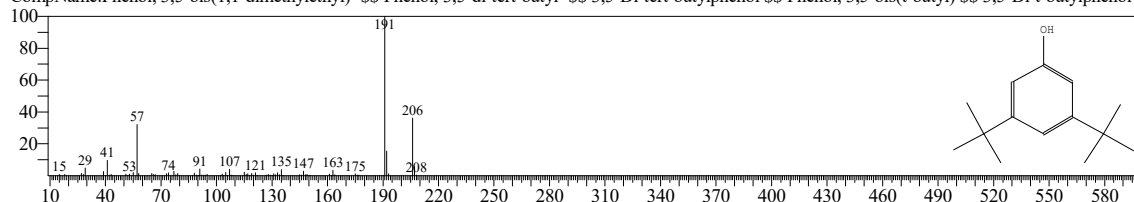

Hit#5 Entry:103047 Library:NIST20M1.lib

SI:84 Formula:C<sub>16</sub>H<sub>24</sub>O<sub>2</sub> CAS:104316-22-5 MolWeight:248 RetIndex:1714

CompName:2,4-Di-tert-butylphenol, acetate

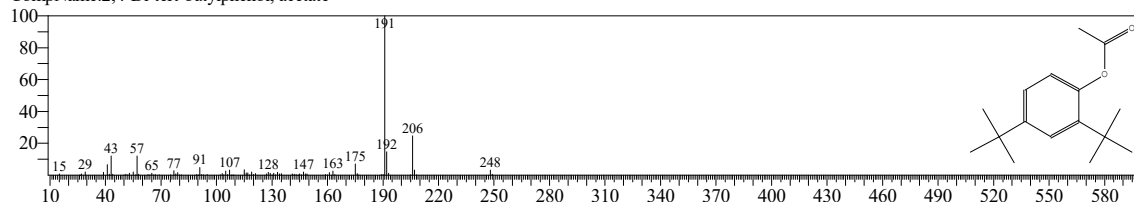

# TNAU

<< Target >>

Line#:5 R.Time:19.950(Scan#:3091) MassPeaks:336

RawMode:Averaged 19.945-19.955(3090-3092) BasePeak:58.05(1049)

BG Mode:Calc. from Peak Group 1 - Event 1 Q3 Scan

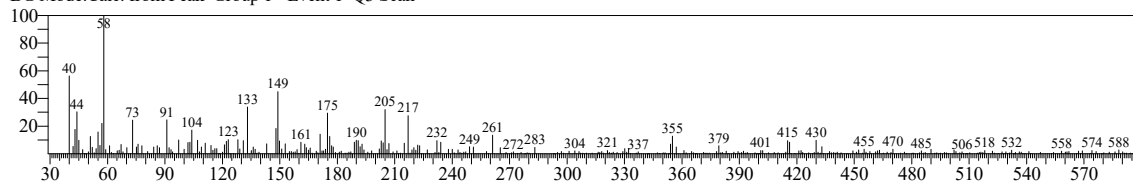

Hit#:1 Entry:77 Library:OA\_TMS\_DB5\_67min\_V3.lib

SI:41 Formula:C12H32O3Si3 CAS:56-81-5 MolWeight:308 RetIndex:1279

CompName:Glycerol-3TMS ; propane-1,2,3-triol

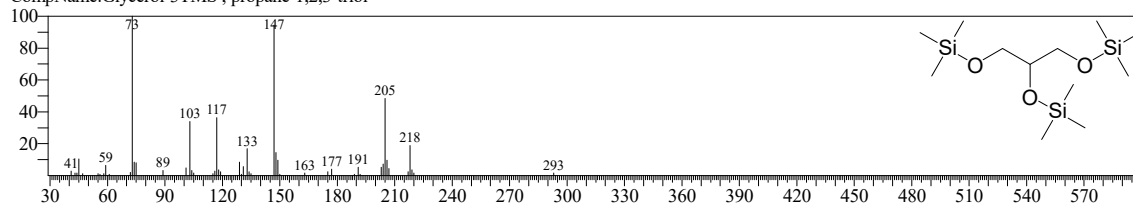

Hit#:2 Entry:152 Library:OA\_TMS\_DB5\_67min\_V3.lib

SI:39 Formula:C13H29NO3Si2 CAS:16284-60-9 MolWeight:303 RetIndex:1518

CompName:Isovalerylglycine-2TMS ; 2-(3-methylbutanoylamino)acetic acid

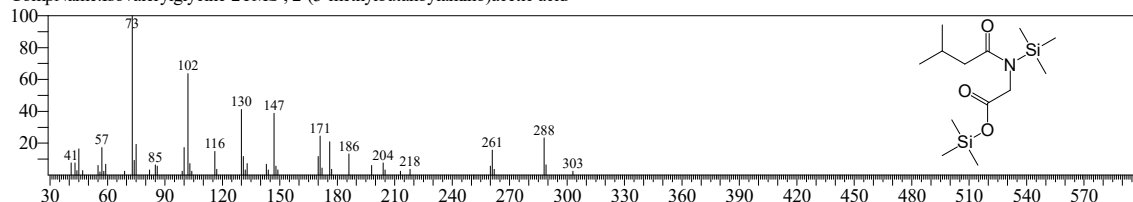

Hit#:3 Entry:313 Library:OA\_TMS\_DB5\_67min\_V3.lib

SI:38 Formula: CAS:0-00-0 MolWeight:427 RetIndex:1831

CompName:Ornithine-d7-4TMS ;

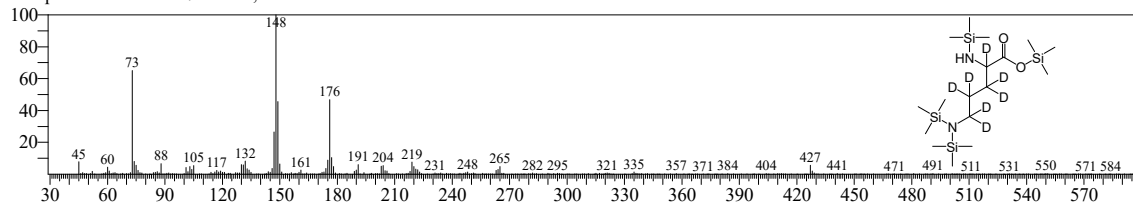

Hit#:4 Entry:1 Library:OA\_TMS\_DB5\_67min\_V3.lib

SI:38 Formula:C7H17NO2Si CAS:1118-68-9 MolWeight:175 RetIndex:990

CompName:Dimethylglycine-TMS ; 2-(dimethylamino)acetic acid

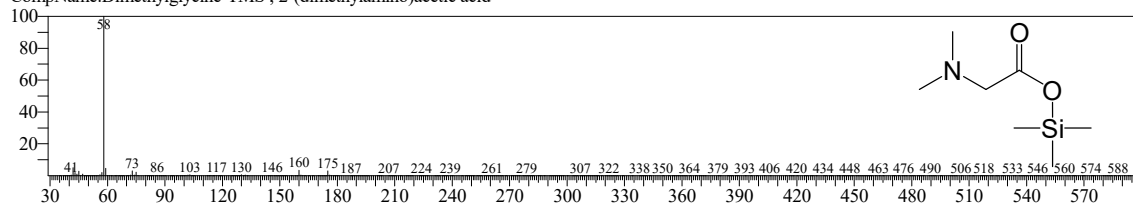

Hit#:5 Entry:10 Library:OA\_TMS\_DB5\_67min\_V3.lib

SI:37 Formula:C10H24O3Si2 CAS:594-61-6 MolWeight:248 RetIndex:1067

CompName:2-Hydroxyisobutyric acid-2TMS ; 2-hydroxy-2-methylpropanoic acid

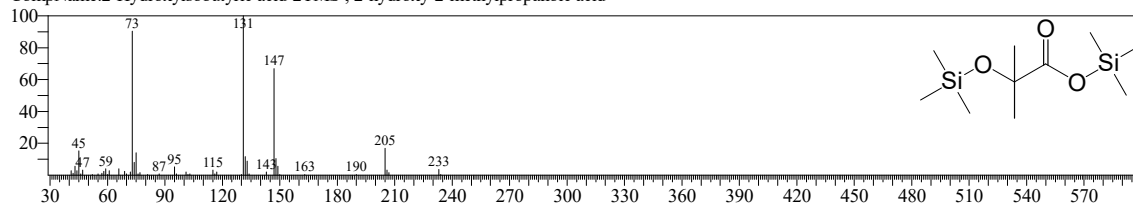

# TNAU

<< Target >>

Line#:6 R.Time:28.075(Scan#:4716) MassPeaks:303

RawMode:Averaged 28.070-28.080(4715-4717) BasePeak:207.00(663)

BG Mode:Calc. from Peak Group 1 - Event 1 Q3 Scan

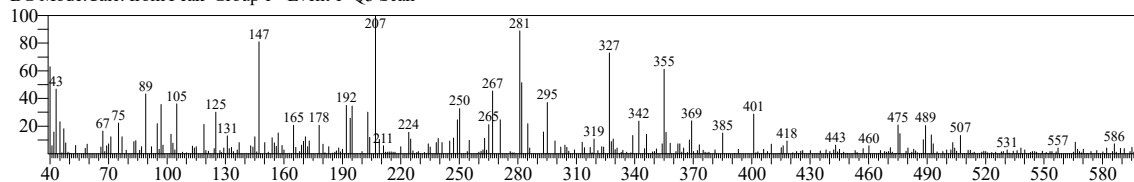

Hit#:1 Entry:402 Library:OA\_TMS\_DB5\_67min\_V3.lib

SI:30 Formula:C20H42O4Si4 CAS:775-01-9 MolWeight:458 RetIndex:1942

CompName:3,4-Dihydroxymandelic acid-4TMS ; 2-(3,4-dihydroxyphenyl)-2-hydroxyacetic acid

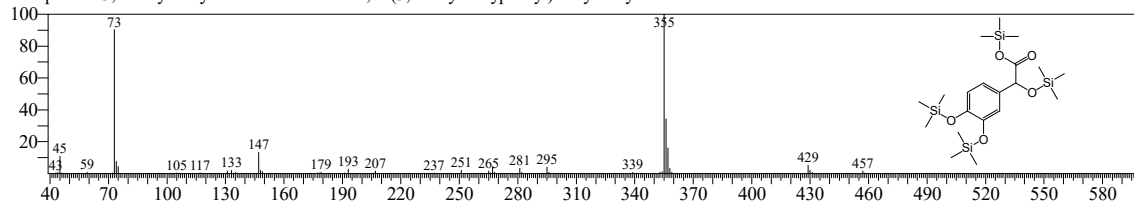

Hit#:2 Entry:211 Library:OA\_TMS\_DB5\_67min\_V3.lib

SI:28 Formula:C13H22O3Si2 CAS:99-96-7 MolWeight:282 RetIndex:1636

CompName:4-Hydroxybenzoic acid-2TMS ; 4-hydroxybenzoic acid

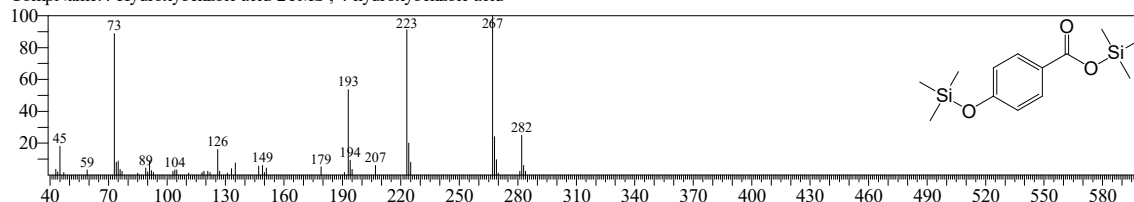

Hit#:3 Entry:179 Library:OA\_TMS\_DB5\_67min\_V3.lib

SI:28 Formula:C13H22O3Si2 CAS:99-06-9 MolWeight:282 RetIndex:1572

CompName:3-Hydroxybenzoic acid-2TMS ; 3-hydroxybenzoic acid

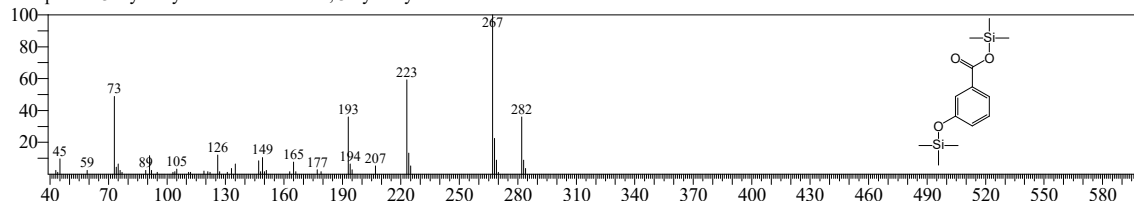

Hit#:4 Entry:310 Library:OA\_TMS\_DB5\_67min\_V3.lib

SI:24 Formula:C11H20N4OSi2 CAS:68-94-0 MolWeight:280 RetIndex:1822

CompName:Hypoxanthine-2TMS ; 3,7-dihydropurin-6-one

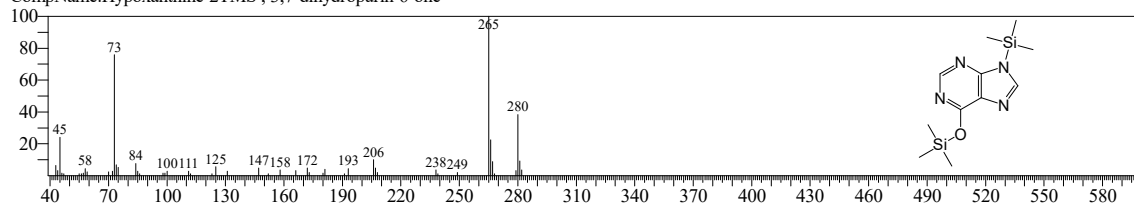

Hit#:5 Entry:9 Library:OA\_TMS\_DB5\_67min\_V3.lib

SI:24 Formula: CAS:0-00-0 MolWeight:237 RetIndex:1062

CompName:Lactic acid-13C3-2TMS ;

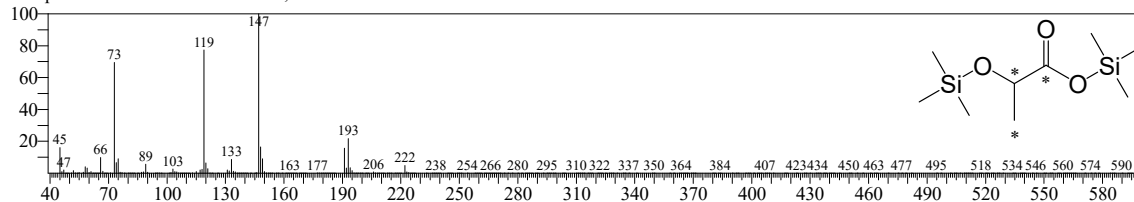

# TNAU

<< Target >>

Line#:7 R.Time:28.135(Scan#:4728) MassPeaks:299

RawMode:Averaged 28.130-28.140(4727-4729) BasePeak:207.05(1646)

BG Mode:Calc. from Peak Group 1 - Event 1 Q3 Scan

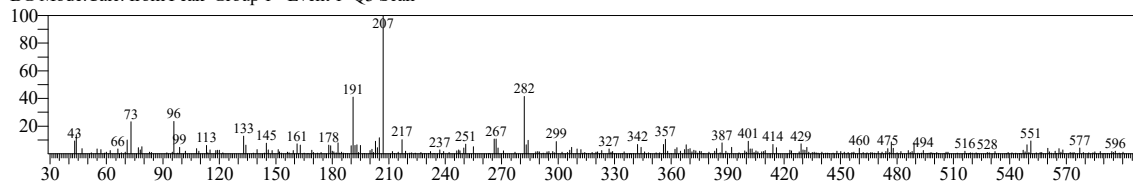

Hit#:1 Entry:290 Library:OA\_TMS\_DB5\_67min\_V3.lib

SI:38 Formula:C<sub>13</sub>H<sub>23</sub>NO<sub>3</sub>Si<sub>2</sub> CAS:548-93-6 MolWeight:297 RetIndex:1773

CompName:3-Hydroxyanthranilic acid-2TMS ; 2-amino-3-hydroxybenzoic acid

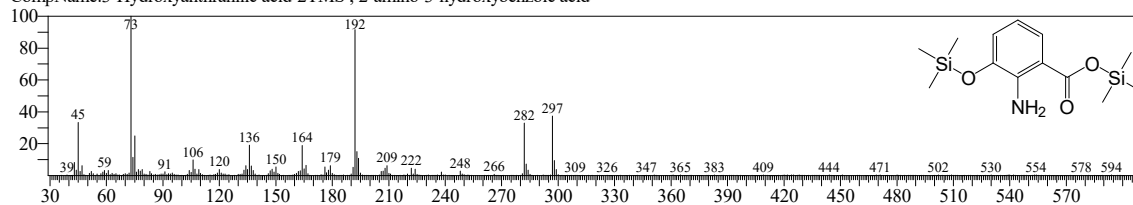

Hit#:2 Entry:343 Library:OA\_TMS\_DB5\_67min\_V3.lib

SI:35 Formula:C<sub>18</sub>H<sub>37</sub>NO<sub>3</sub>Si<sub>3</sub> CAS:51-43-4 MolWeight:399 RetIndex:1868

CompName:Epinephrine-3TMS ; 4-[(1R)-1-hydroxy-2-(methylamino)ethyl]benzene-1,2-diol

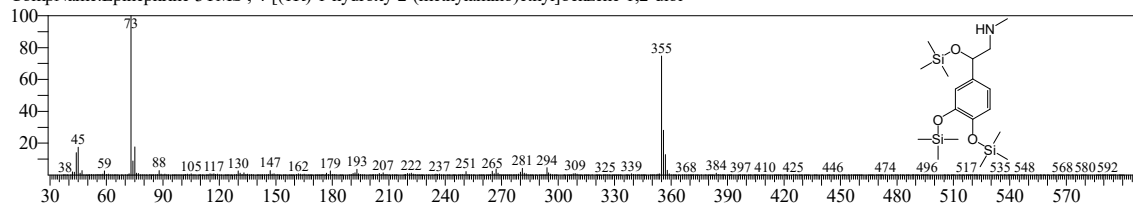

Hit#:3 Entry:211 Library:OA\_TMS\_DB5\_67min\_V3.lib

SI:34 Formula:C<sub>13</sub>H<sub>22</sub>O<sub>3</sub>Si<sub>2</sub> CAS:99-96-7 MolWeight:282 RetIndex:1636

CompName:4-Hydroxybenzoic acid-2TMS ; 4-hydroxybenzoic acid

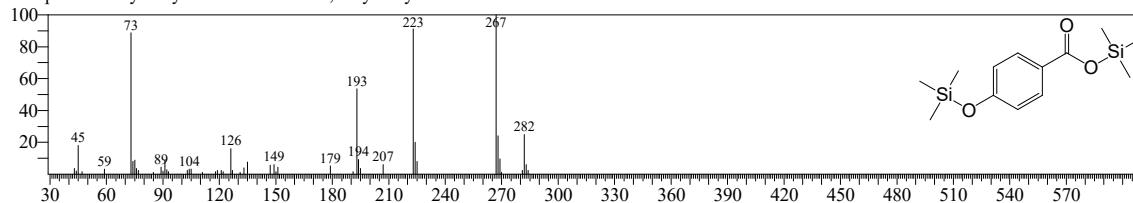

Hit#:4 Entry:179 Library:OA\_TMS\_DB5\_67min\_V3.lib

SI:34 Formula:C<sub>13</sub>H<sub>22</sub>O<sub>3</sub>Si<sub>2</sub> CAS:99-06-9 MolWeight:282 RetIndex:1572

CompName:3-Hydroxybenzoic acid-2TMS ; 3-hydroxybenzoic acid

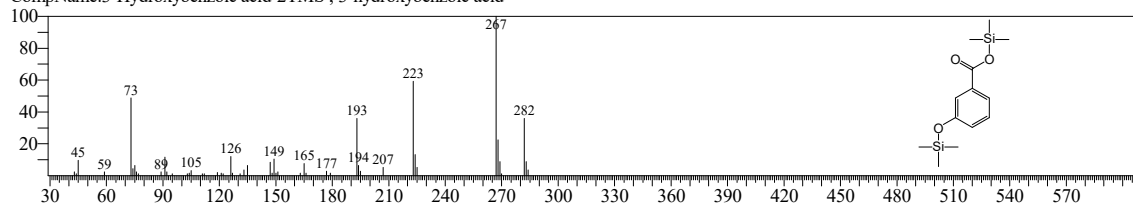

Hit#:5 Entry:236 Library:OA\_TMS\_DB5\_67min\_V3.lib

SI:34 Formula:C<sub>17</sub>H<sub>42</sub>O<sub>5</sub>Si<sub>4</sub> CAS:50-69-1 MolWeight:438 RetIndex:1673

CompName:Ribose-4TMS(3) ; (3R,4S,5R)-5-(hydroxymethyl)oxolane-2,3,4-triol

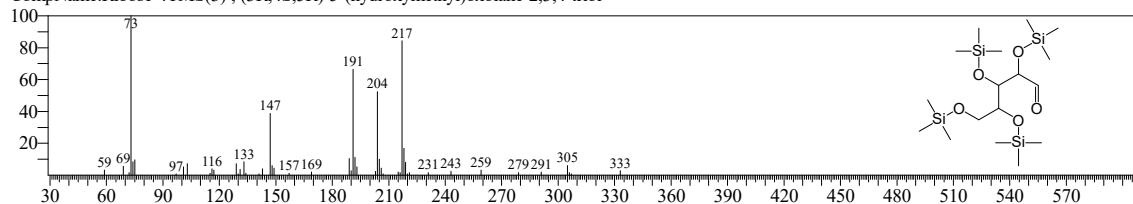



# TNAU

<< Target >>

Line#:8 R.Time:28.185(Scan#:4738) MassPeaks:307

RawMode:Averaged 28.180-28.190(4737-4739) BasePeak:207.05(2023)

BG Mode:Calc. from Peak Group 1 - Event 1 Q3 Scan

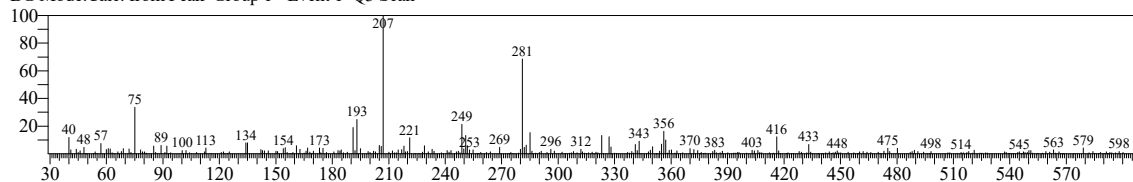

Hit#:1 Entry:402 Library:OA\_TMS\_DB5\_67min\_V3.lib

SI:33 Formula:C20H42O4Si4 CAS:775-01-9 MolWeight:458 RetIndex:1942

CompName:3,4-Dihydroxymandelic acid-4TMS ; 2-(3,4-dihydroxyphenyl)-2-hydroxyacetic acid

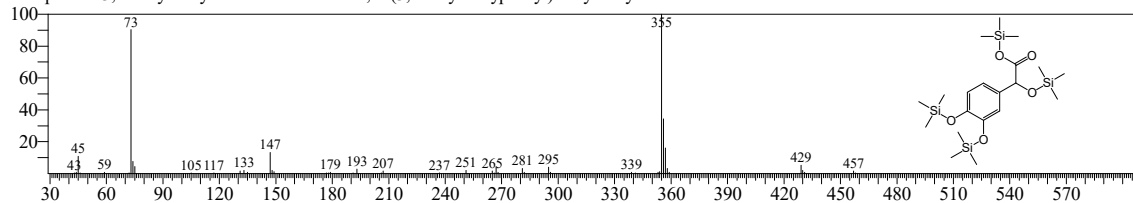

Hit#:2 Entry:315 Library:OA\_TMS\_DB5\_67min\_V3.lib

SI:31 Formula:C16H30O4Si3 CAS:99-50-3 MolWeight:370 RetIndex:1833

CompName:Protocatechuic acid-3TMS ; 3,4-dihydroxybenzoic acid

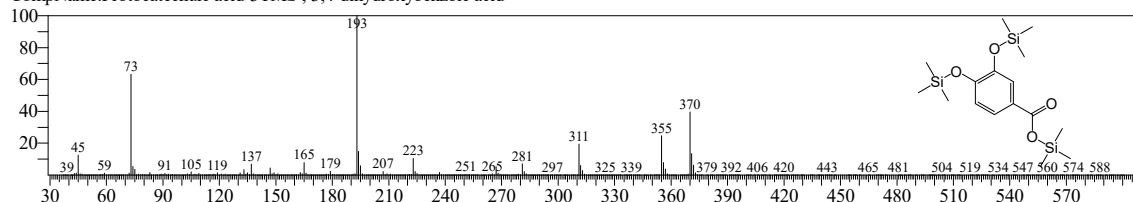

Hit#:3 Entry:539 Library:OA\_TMS\_DB5\_67min\_V3.lib

SI:25 Formula:C27H60O3Si2 CAS:544-62-7 MolWeight:488 RetIndex:2684

CompName:Butyl alcohol-2TMS ; 3-octadecoxypropane-1,2-diol

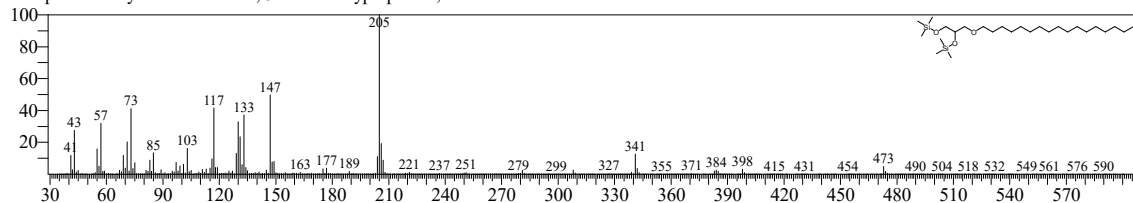

Hit#:4 Entry:420 Library:OA\_TMS\_DB5\_67min\_V3.lib

SI:24 Formula:C18H33NO4Si3 CAS:487-54-7 MolWeight:411 RetIndex:1973

CompName:2-Hydroxyhippuric acid-3TMS ; 2-[(2-hydroxybenzoyl)amino]acetic acid

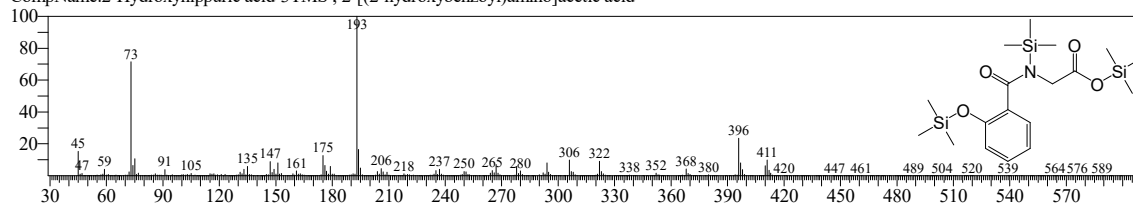

Hit#:5 Entry:413 Library:OA\_TMS\_DB5\_67min\_V3.lib

SI:24 Formula:C18H35NO3Si3 CAS:60-18-4 MolWeight:397 RetIndex:1958

CompName:Tyrosine-3TMS ; (2S)-2-amino-3-(4-hydroxyphenyl)propanoic acid

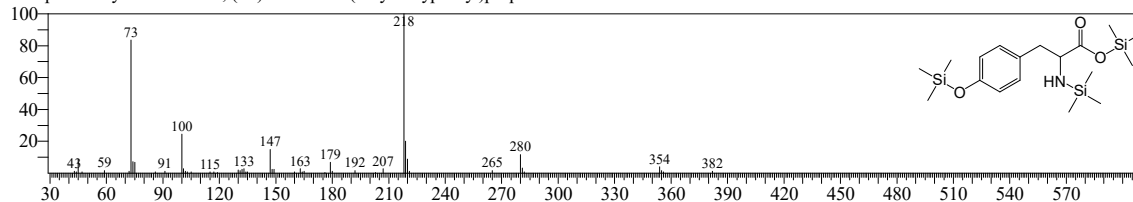

# TNAU

<< Target >>

Line#9 R.Time:28.595(Scan#:4820) MassPeaks:304

RawMode:Averaged 28.590-28.600(4819-4821) BasePeak:207.00(1523)

BG Mode:Calc. from Peak Group 1 - Event 1 Q3 Scan

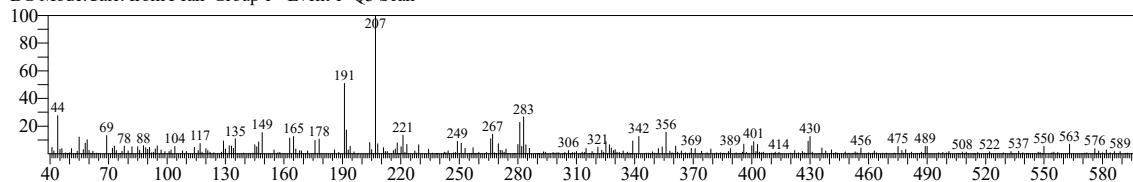

Hit#1 Entry:288 Library:OA\_TMS\_DB5\_67min\_V3.lib

SI:34 Formula:C<sub>21</sub>H<sub>52</sub>O<sub>6</sub>Si<sub>5</sub> CAS:3458-28-4 MolWeight:540 RetIndex:1771

CompName:Mannose-5TMS(1) ; (3S,4S,5S,6R)-6-(hydroxymethyl)oxane-2,3,4,5-tetrol

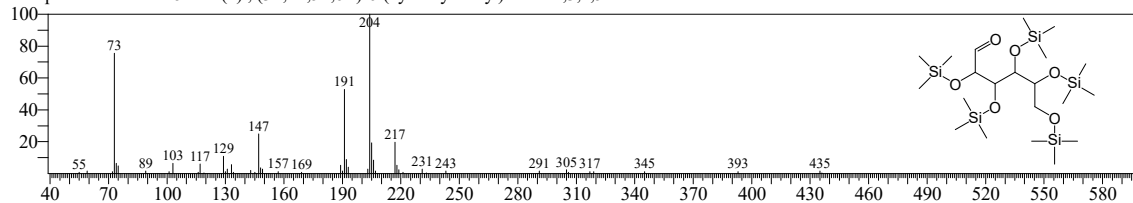

Hit#2 Entry:386 Library:OA\_TMS\_DB5\_67min\_V3.lib

SI:34 Formula:C<sub>21</sub>H<sub>52</sub>O<sub>6</sub>Si<sub>5</sub> CAS:50-99-7 MolWeight:540 RetIndex:1922

CompName:Glucose-5TMS(1) ; (3R,4S,5S,6R)-6-(hydroxymethyl)oxane-2,3,4,5-tetrol

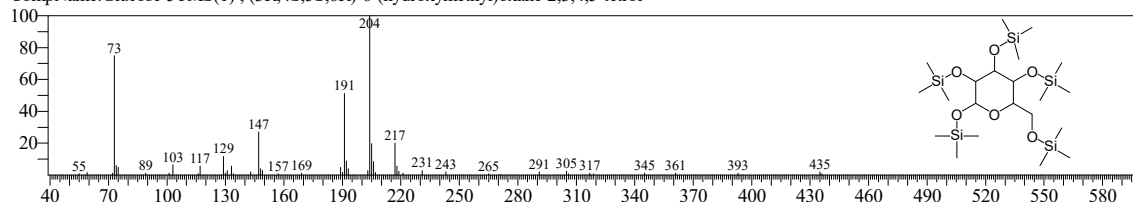

Hit#3 Entry:311 Library:OA\_TMS\_DB5\_67min\_V3.lib

SI:34 Formula:C<sub>21</sub>H<sub>52</sub>O<sub>6</sub>Si<sub>5</sub> CAS:59-23-4 MolWeight:540 RetIndex:1824

CompName:Galactose-5TMS(1) ; (3R,4S,5R,6R)-6-(hydroxymethyl)oxane-2,3,4,5-tetrol

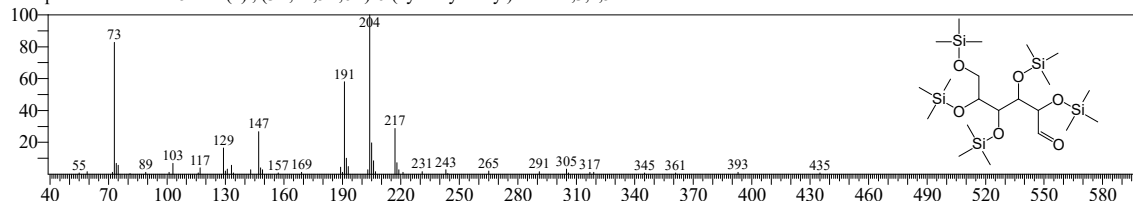

Hit#4 Entry:349 Library:OA\_TMS\_DB5\_67min\_V3.lib

SI:33 Formula:C<sub>21</sub>H<sub>52</sub>O<sub>6</sub>Si<sub>5</sub> CAS:2595-97-3 MolWeight:540 RetIndex:1874

CompName:Allose-5TMS ; (2R,3R,4R,5R)-2,3,4,5,6-pentahydroxyhexanal

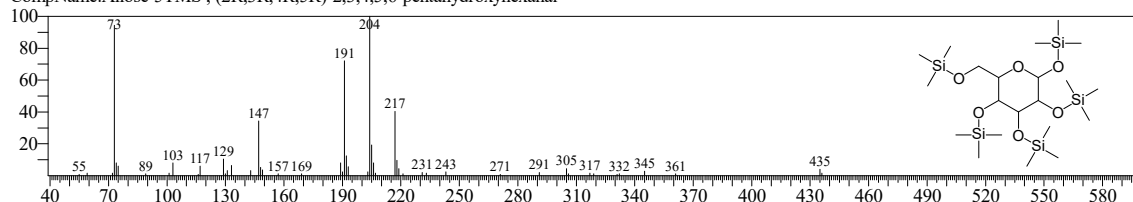

Hit#5 Entry:271 Library:OA\_TMS\_DB5\_67min\_V3.lib

SI:32 Formula:C<sub>18</sub>H<sub>44</sub>O<sub>5</sub>Si<sub>4</sub> CAS:3615-37-0 MolWeight:452 RetIndex:1738

CompName:Fucose-4TMS(2) ; (2S,3R,4S,5R,6R)-6-methyloxane-2,3,4,5-tetrol

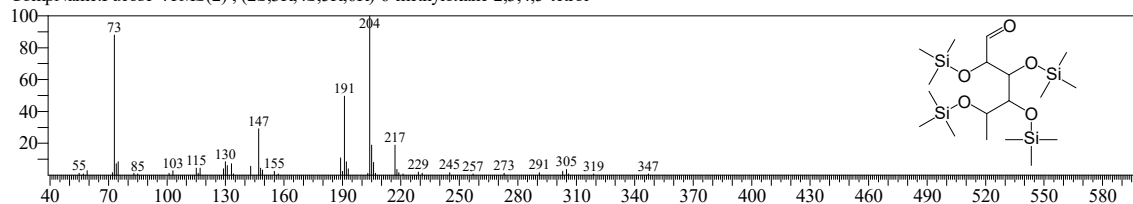

# TNAU

<< Target >>

Line#:10 R.Time:28.660(Scan#:4833) MassPeaks:247

RawMode:Averaged 28.655-28.665(4832-4834) BasePeak:207.05(1726)

BG Mode:Calc. from Peak Group 1 - Event 1 Q3 Scan

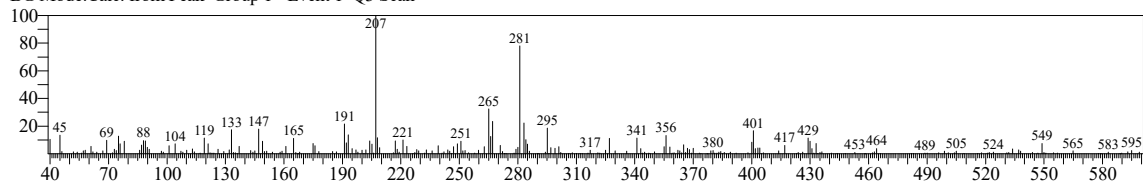

Hit#:1 Entry:310 Library:OA\_TMS\_DB5\_67min\_V3.lib

SI:33 Formula:C11H20N4OSi2 CAS:68-94-0 MolWeight:280 RetIndex:1822

CompName:Hypoxanthine-2TMS ; 3,7-dihydropurin-6-one

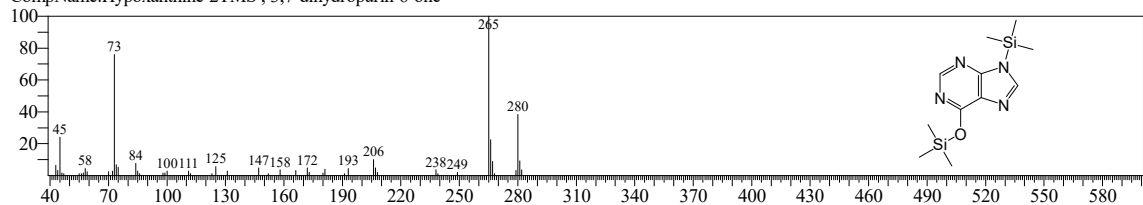

Hit#:2 Entry:345 Library:OA\_TMS\_DB5\_67min\_V3.lib

SI:32 Formula:C21H52O6Si5 CAS:59-23-4 MolWeight:540 RetIndex:1868

CompName:Galactose-5TMS(2) ; (3R,4S,5R,6R)-6-(hydroxymethyl)oxane-2,3,4,5-tetrol

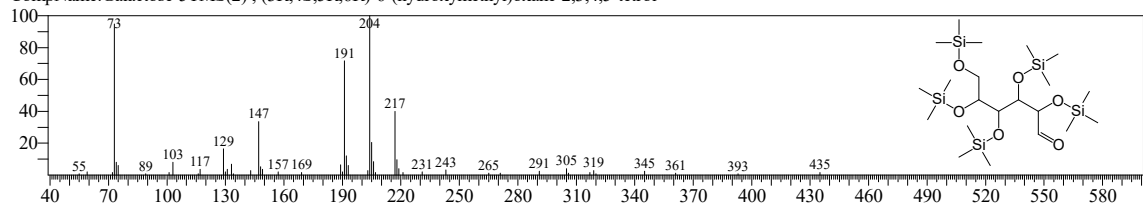

Hit#:3 Entry:386 Library:OA\_TMS\_DB5\_67min\_V3.lib

SI:32 Formula:C21H52O6Si5 CAS:50-99-7 MolWeight:540 RetIndex:1922

CompName:Glucose-5TMS(1) ; (3R,4S,5S,6R)-6-(hydroxymethyl)oxane-2,3,4,5-tetrol

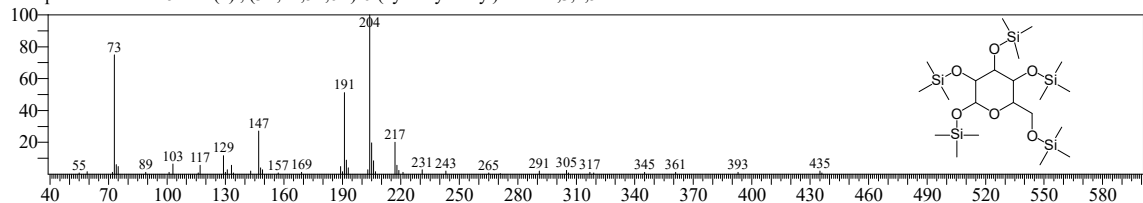

Hit#:4 Entry:203 Library:OA\_TMS\_DB5\_67min\_V3.lib

SI:32 Formula:C13H23NO2Si2 CAS:118-92-3 MolWeight:281 RetIndex:1623

CompName:Anthranilic acid-2TMS ; 2-aminobenzoic acid

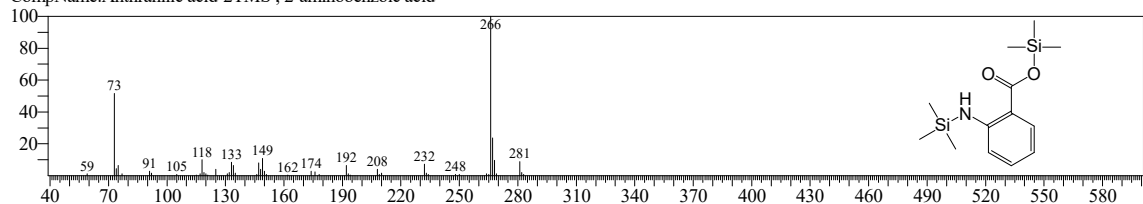

Hit#:5 Entry:211 Library:OA\_TMS\_DB5\_67min\_V3.lib

SI:32 Formula:C13H22O3Si2 CAS:99-96-7 MolWeight:282 RetIndex:1636

CompName:4-Hydroxybenzoic acid-2TMS ; 4-hydroxybenzoic acid

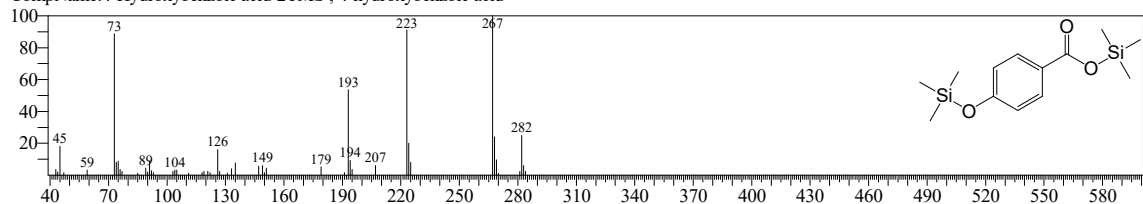

# TNAU

<< Target >>

Line#:11 R.Time:29.325(Scan#:4966) MassPeaks:300

RawMode:Averaged 29.320-29.330(4965-4967) BasePeak:73.10(996)

BG Mode:Calc. from Peak Group 1 - Event 1 Q3 Scan

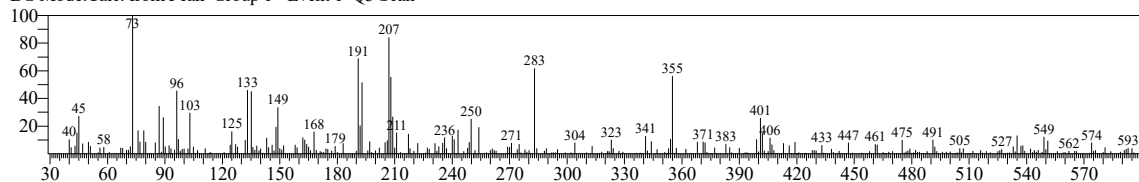

Hit#:1 Entry:354 Library:OA\_TMS\_DB5\_67min\_V3.lib

SI:38 Formula:C16H31NO3Si3 CAS:548-93-6 MolWeight:369 RetIndex:1886

CompName:3-Hydroxyanthranilic acid-3TMS ; 2-amino-3-hydroxybenzoic acid

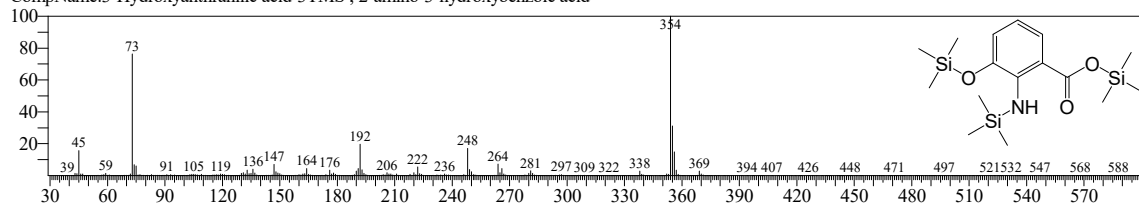

Hit#:2 Entry:232 Library:OA\_TMS\_DB5\_67min\_V3.lib

SI:38 Formula:C17H42O5Si4 CAS:10323-20-3 MolWeight:438 RetIndex:1667

CompName:Arabinose-4TMS(2) ; (2S,3R,4R)-2,3,4,5-tetrahydroxypentanal

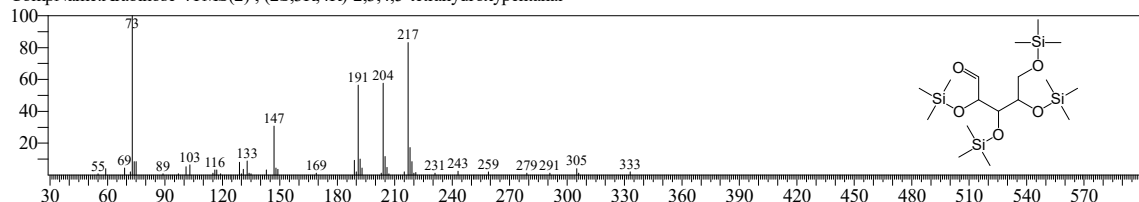

Hit#:3 Entry:566 Library:OA\_TMS\_DB5\_67min\_V3.lib

SI:36 Formula:C19H36N5O6PSi3 CAS:60-92-4 MolWeight:545 RetIndex:3138

CompName:Adenosine 3',5'-cyclic monophosphate-3TMS ; (4aR,6R,7R,7aS)-6-(6-aminopurin-9-yl)-2-hydroxy-2-oxo-4a,6,7,7a-tetrahydro-4H-fur

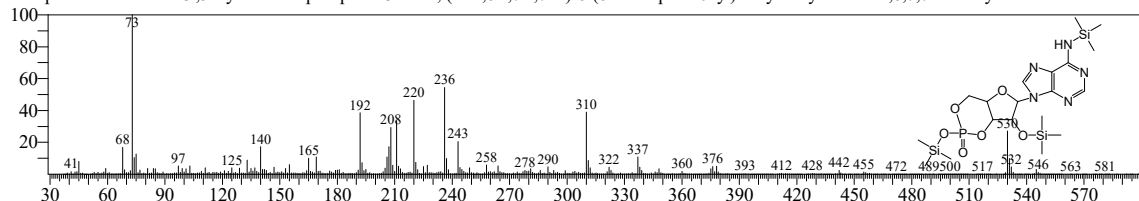

Hit#:4 Entry:236 Library:OA\_TMS\_DB5\_67min\_V3.lib

SI:36 Formula:C17H42O5Si4 CAS:50-69-1 MolWeight:438 RetIndex:1673

CompName:Ribose-4TMS(3) ; (3R,4S,5R)-5-(hydroxymethyl)oxolane-2,3,4-triol

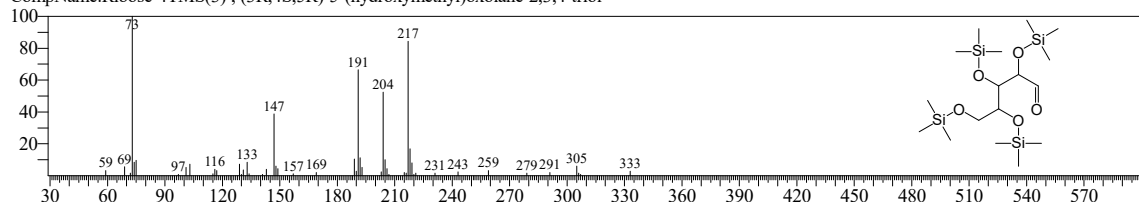

Hit#:5 Entry:205 Library:OA\_TMS\_DB5\_67min\_V3.lib

SI:36 Formula:C17H42O5Si4 CAS:1114-34-7 MolWeight:438 RetIndex:1624

CompName:Lyxose-4TMS(1) ; (2S,3S,4R)-2,3,4,5-tetrahydroxypentanal

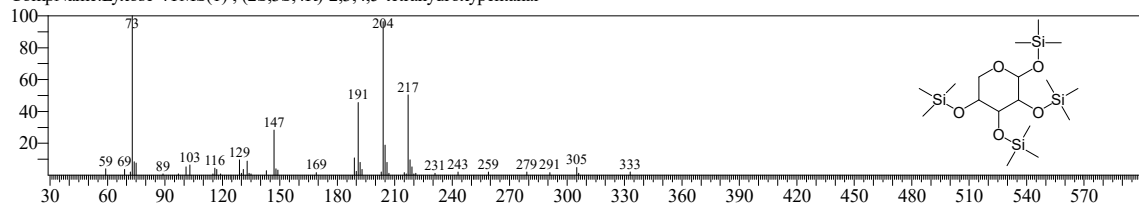

# TNAU

<< Target >>

Line#:12 R.Time:29.405(Scan#:4982) MassPeaks:297

RawMode:Averaged 29.400-29.410(4981-4983) BasePeak:73.05(878)

BG Mode:Calc. from Peak Group 1 - Event 1 Q3 Scan

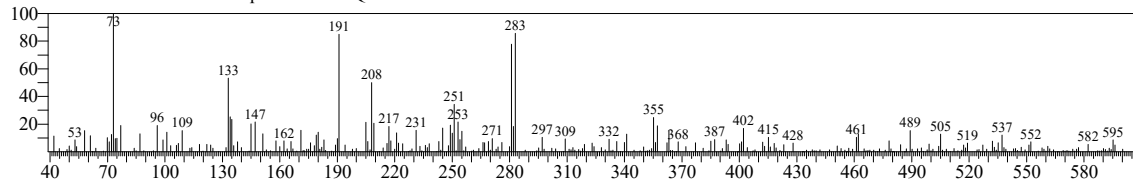

Hit#:1 Entry:200 Library:OA\_TMS\_DB5\_67min\_V3.lib

SI:41 Formula:C<sub>14</sub>H<sub>24</sub>O<sub>3</sub>Si<sub>2</sub> CAS:621-37-4 MolWeight:296 RetIndex:1617

CompName:3-Hydroxyphenylacetic acid-2TMS ; 2-(3-hydroxyphenyl)acetic acid

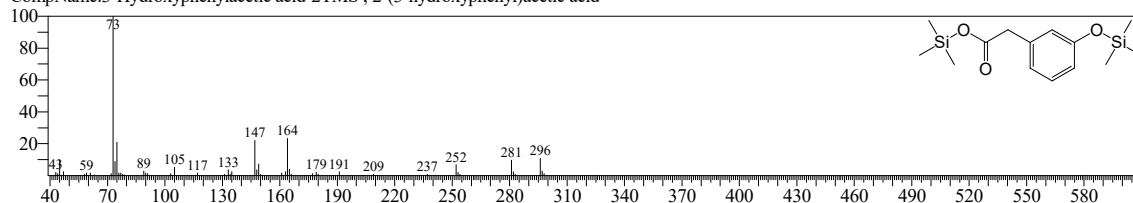

Hit#:2 Entry:220 Library:OA\_TMS\_DB5\_67min\_V3.lib

SI:40 Formula:C<sub>14</sub>H<sub>24</sub>O<sub>3</sub>Si<sub>2</sub> CAS:156-38-7 MolWeight:296 RetIndex:1647

CompName:4-Hydroxyphenylacetic acid-2TMS ; 2-(4-hydroxyphenyl)acetic acid

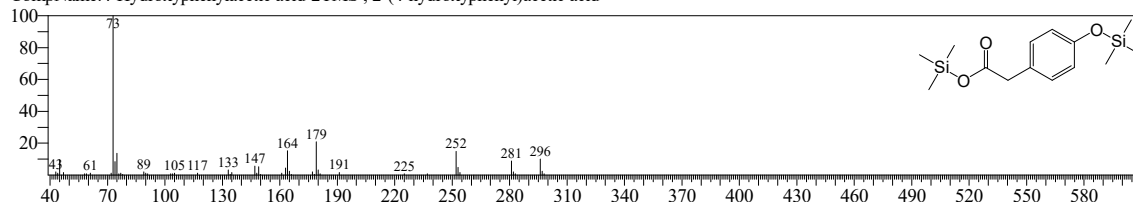

Hit#:3 Entry:184 Library:OA\_TMS\_DB5\_67min\_V3.lib

SI:40 Formula:C<sub>14</sub>H<sub>24</sub>O<sub>3</sub>Si<sub>2</sub> CAS:614-75-5 MolWeight:296 RetIndex:1579

CompName:2-Hydroxyphenylacetic acid-2TMS ; 2-(2-hydroxyphenyl)acetic acid

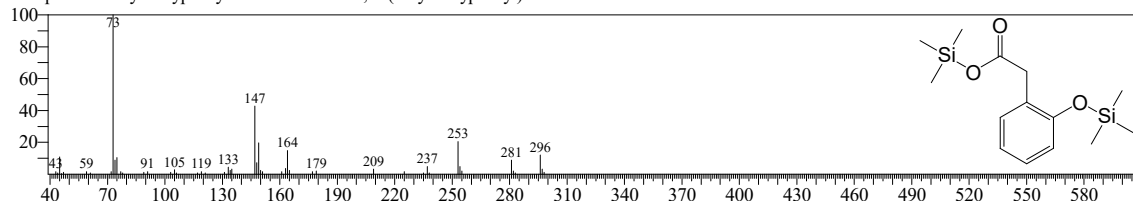

Hit#:4 Entry:25 Library:OA\_TMS\_DB5\_67min\_V3.lib

SI:39 Formula: C<sub>10</sub>H<sub>18</sub>O<sub>4</sub>Si<sub>2</sub> CAS:0-00-0 MolWeight:251 RetIndex:1130

CompName:2-Hydroxybutyric acid-d3-2TMS ;

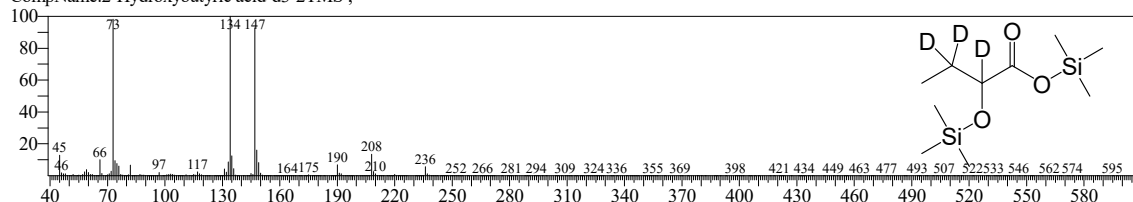

Hit#:5 Entry:232 Library:OA\_TMS\_DB5\_67min\_V3.lib

SI:37 Formula:C<sub>17</sub>H<sub>42</sub>O<sub>5</sub>Si<sub>4</sub> CAS:10323-20-3 MolWeight:438 RetIndex:1667

CompName:Arabinose-4TMS(2) ; (2S,3R,4R)-2,3,4,5-tetrahydroxypentanal

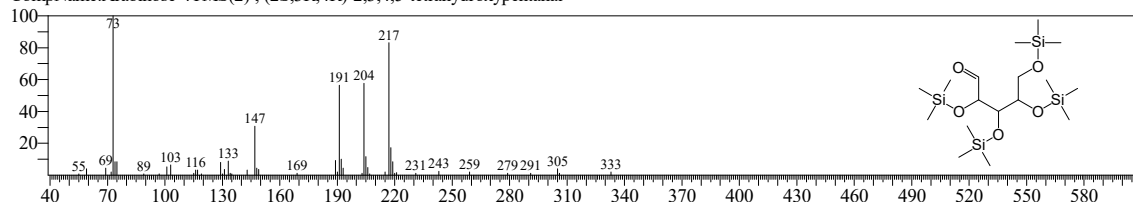

# TNAU

<< Target >>

Line#:13 R.Time:29.540(Scan#:5009) MassPeaks:287

RawMode:Averaged 29.535-29.545(5008-5010) BasePeak:75.05(798)

BG Mode:Calc. from Peak Group 1 - Event 1 Q3 Scan

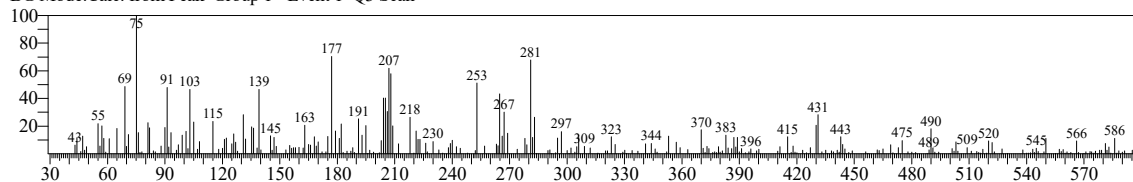

Hit#:1 Entry:539 Library:OA\_TMS\_DB5\_67min\_V3.lib

SI:32 Formula:C27H60O3Si2 CAS:544-62-7 MolWeight:488 RetIndex:2684

CompName:Batyl alcohol-2TMS ; 3-octadecoxypropane-1,2-diol

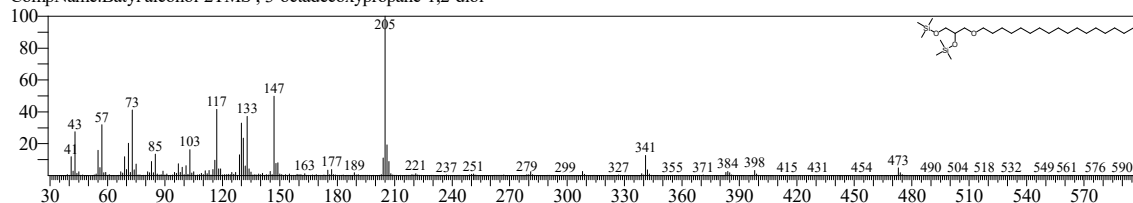

Hit#:2 Entry:307 Library:OA\_TMS\_DB5\_67min\_V3.lib

SI:28 Formula:C15H25NO3Si2 CAS:66407-11-2 MolWeight:323 RetIndex:1819

CompName:Hippuric acid-2TMS ; 2-benzamidoacetic acid

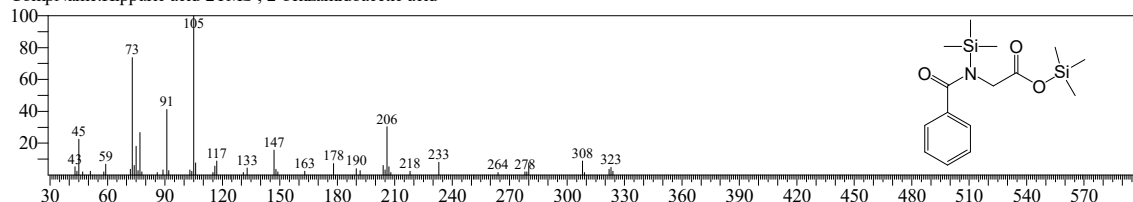

Hit#:3 Entry:211 Library:OA\_TMS\_DB5\_67min\_V3.lib

SI:28 Formula:C13H22O3Si2 CAS:99-96-7 MolWeight:282 RetIndex:1636

CompName:4-Hydroxybenzoic acid-2TMS ; 4-hydroxybenzoic acid

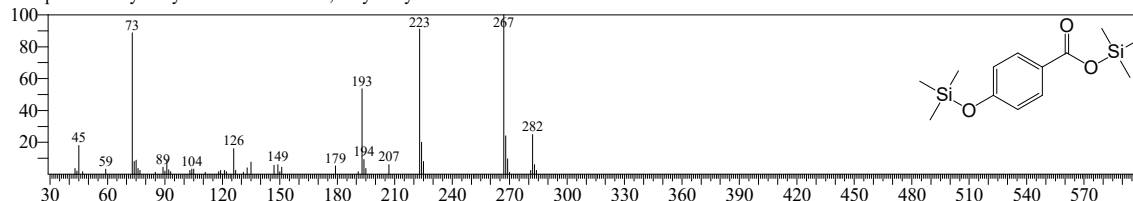

Hit#:4 Entry:252 Library:OA\_TMS\_DB5\_67min\_V3.lib

SI:27 Formula:C18H44O5Si4 CAS:3615-37-0 MolWeight:452 RetIndex:1695

CompName:Fucose-4TMS(1) ; (2S,3R,4S,5R,6R)-6-methyloxane-2,3,4,5-tetrol

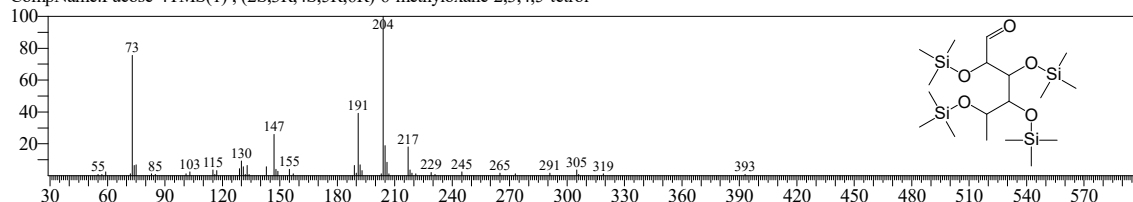

Hit#:5 Entry:276 Library:OA\_TMS\_DB5\_67min\_V3.lib

SI:27 Formula:C18H44O5Si4 CAS:154-17-6 MolWeight:452 RetIndex:1745

CompName:2-Deoxy-glucose-4TMS(1) ; (2S,4S,5S,6S)-6-(hydroxymethyl)oxane-2,4,5-triol

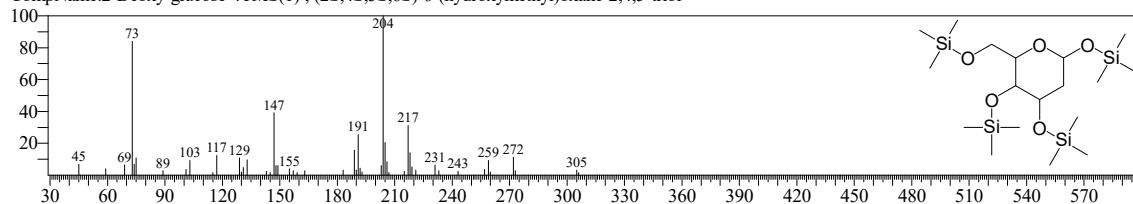

# TNAU

<< Target >>

Line#:14 R.Time:29.730(Scan#:5047) MassPeaks:295

RawMode:Averaged 29.725-29.735(5046-5048) BasePeak:207.00(2884)

BG Mode:Calc. from Peak Group 1 - Event 1 Q3 Scan

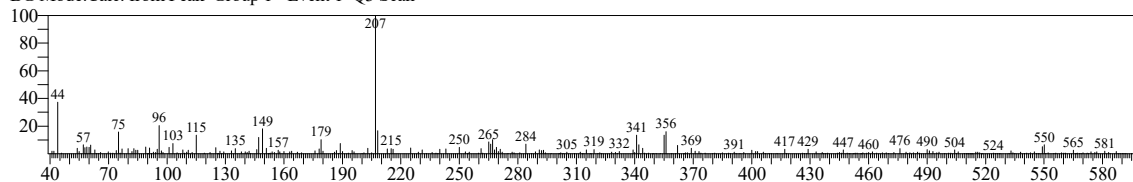

Hit#:1 Entry:402 Library:OA\_TMS\_DB5\_67min\_V3.lib

SI:35 Formula:C20H42O4Si4 CAS:775-01-9 MolWeight:458 RetIndex:1942

CompName:3,4-Dihydroxymandelic acid-4TMS ; 2-(3,4-dihydroxyphenyl)-2-hydroxyacetic acid

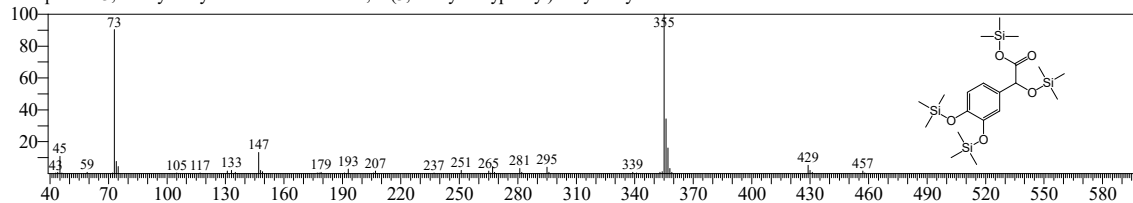

Hit#:2 Entry:13 Library:OA\_TMS\_DB5\_67min\_V3.lib

SI:31 Formula:C8H20O3Si2 CAS:79-14-1 MolWeight:220 RetIndex:1074

CompName:Glycolic acid-2TMS ; 2-hydroxyacetic acid

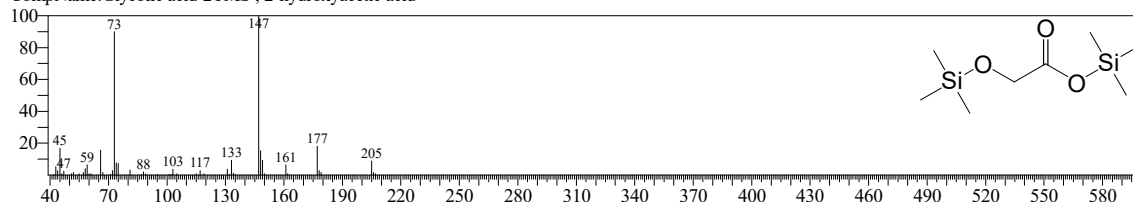

Hit#:3 Entry:179 Library:OA\_TMS\_DB5\_67min\_V3.lib

SI:31 Formula:C13H22O3Si2 CAS:99-06-9 MolWeight:282 RetIndex:1572

CompName:3-Hydroxybenzoic acid-2TMS ; 3-hydroxybenzoic acid

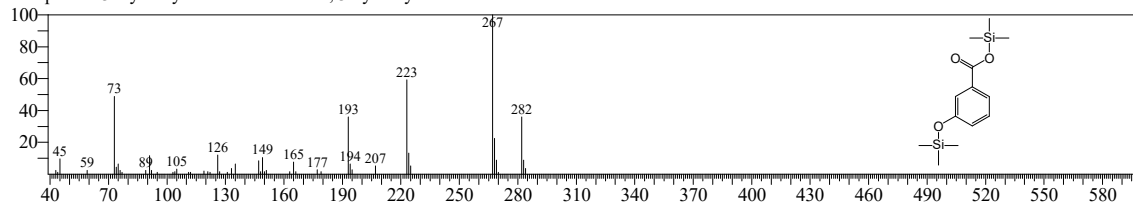

Hit#:4 Entry:382 Library:OA\_TMS\_DB5\_67min\_V3.lib

SI:29 Formula:C18H34O4Si3 CAS:6482-98-0 MolWeight:398 RetIndex:1918

CompName:4-Hydroxyphenyllactic acid-3TMS ; 2-hydroxy-3-(4-hydroxyphenyl)propanoate

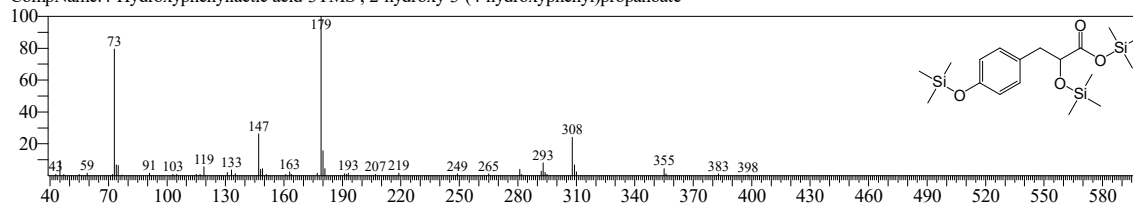

Hit#:5 Entry:310 Library:OA\_TMS\_DB5\_67min\_V3.lib

SI:29 Formula:C11H20N4OSi2 CAS:68-94-0 MolWeight:280 RetIndex:1822

CompName:Hypoxanthine-2TMS ; 3,7-dihydropurin-6-one

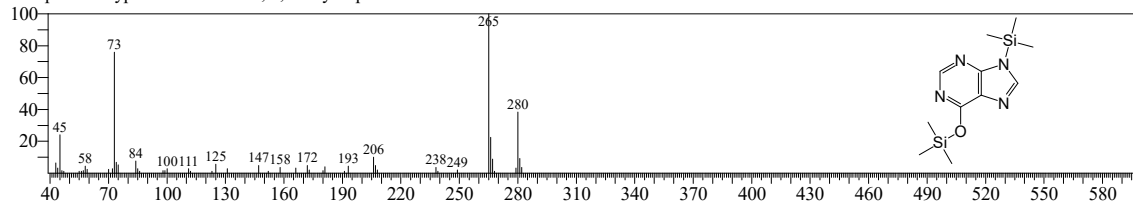

# TNAU

<< Target >>

Line#:15 R.Time:31.165(Scan#:5334) MassPeaks:270

RawMode:Averaged 31.160-31.170(5333-5335) BasePeak:207.05(1343)

BG Mode:Calc. from Peak Group 1 - Event 1 Q3 Scan

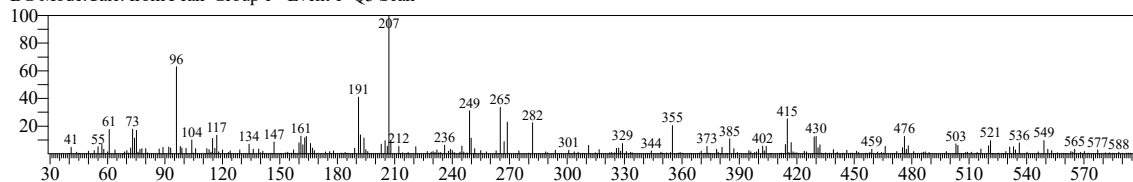

Hit#:1 Entry:290 Library:OA TMS DB5\_67min\_V3.lib

SI:36 Formula:C13H23NO3Si2 CAS:548-93-6 MolWeight:297 RetIndex:1773

CompName:3-Hydroxyanthranilic acid-2TMS ; 2-amino-3-hydroxybenzoic acid

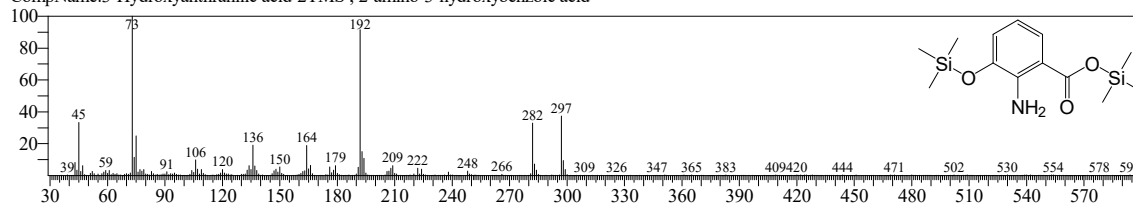

Hit#:2 Entry:343 Library:OA TMS DB5\_67min\_V3.lib

SI:33 Formula:C18H37NO3Si3 CAS:51-43-4 MolWeight:399 RetIndex:1868

CompName:Epinephrine-3TMS ; 4-[(1R)-1-hydroxy-2-(methylamino)ethyl]benzene-1,2-diol

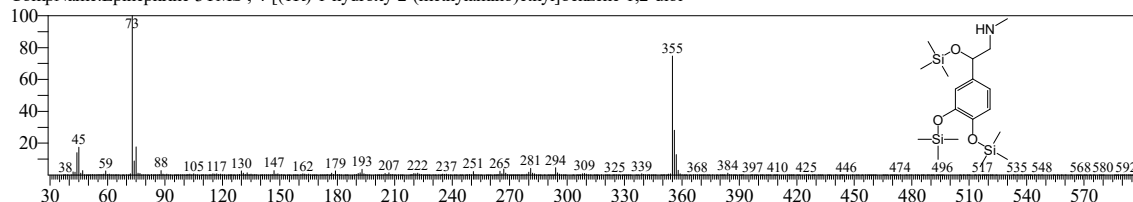

Hit#:3 Entry:402 Library:OA TMS DB5\_67min\_V3.lib

SI:33 Formula:C20H42O4Si4 CAS:775-01-9 MolWeight:458 RetIndex:1942

CompName:3,4-Dihydroxymandelic acid-4TMS ; 2-(3,4-dihydroxyphenyl)-2-hydroxyacetic acid

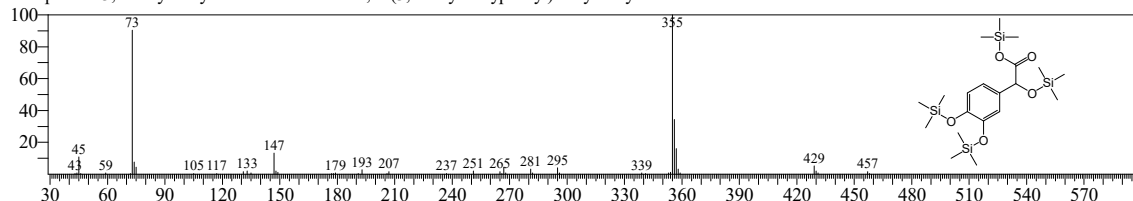

Hit#:4 Entry:256 Library:OA TMS DB5\_67min\_V3.lib

SI:32 Formula: CAS:0-00-0 MolWeight:472 RetIndex:1698

CompName:Ribose-13C5-meto-4TMS ;

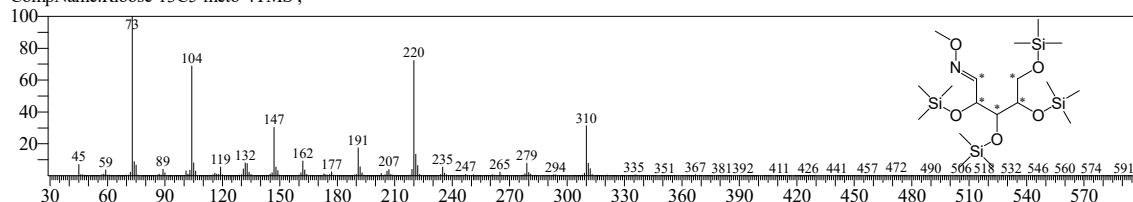

Hit#:5 Entry:310 Library:OA TMS DB5\_67min\_V3.lib

SI:32 Formula:C11H20N4OSi2 CAS:68-94-0 MolWeight:280 RetIndex:1822

CompName:Hypoxanthine-2TMS ; 3,7-dihydropurin-6-one

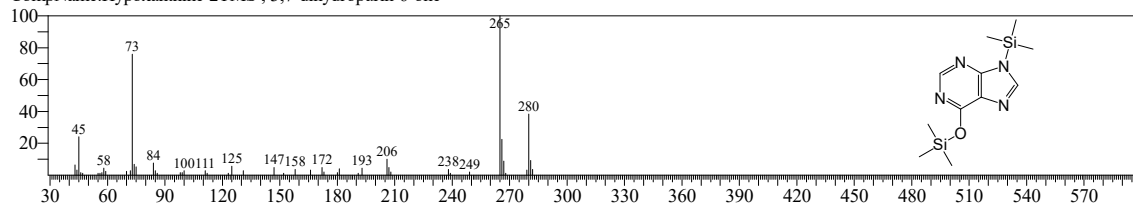



# TNAU

<< Target >>

Line#:16 R.Time:31.325(Scan#:5366) MassPeaks:270

RawMode:Averaged 31.320-31.330(5365-5367) BasePeak:207.00(1452)

BG Mode:Calc. from Peak Group 1 - Event 1 Q3 Scan

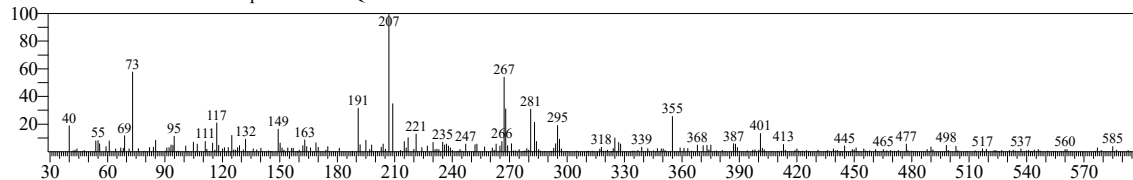

Hit#:1 Entry:402 Library:OA\_TMS\_DB5\_67min\_V3.lib

SI:38 Formula:C20H42O4Si4 CAS:775-01-9 MolWeight:458 RetIndex:1942

CompName:3,4-Dihydroxymandelic acid-4TMS ; 2-(3,4-dihydroxyphenyl)-2-hydroxyacetic acid

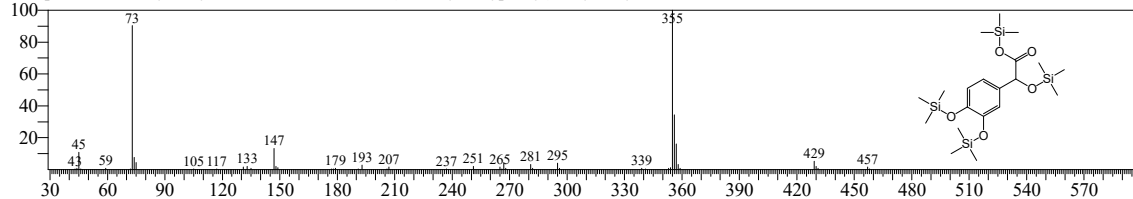

Hit#:2 Entry:294 Library:OA\_TMS\_DB5\_67min\_V3.lib

SI:37 Formula:C15H26O4Si2 CAS:306-08-1 MolWeight:326 RetIndex:1782

CompName:Homovanillic acid-2TMS ; 2-(4-hydroxy-3-methoxyphenyl)acetic acid

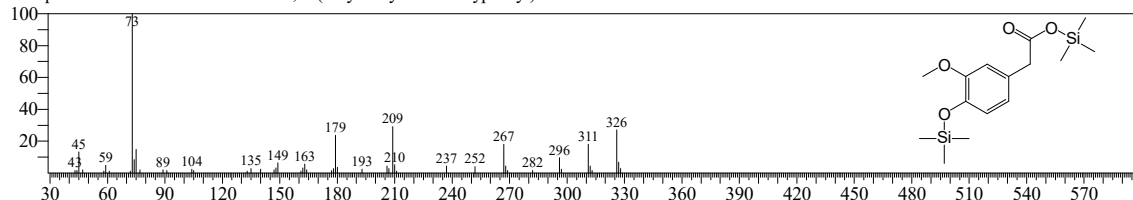

Hit#:3 Entry:343 Library:OA\_TMS\_DB5\_67min\_V3.lib

SI:37 Formula:C18H37NO3Si3 CAS:51-43-4 MolWeight:399 RetIndex:1868

CompName:Epinephrine-3TMS ; 4-[(1R)-1-hydroxy-2-(methylamino)ethyl]benzene-1,2-diol

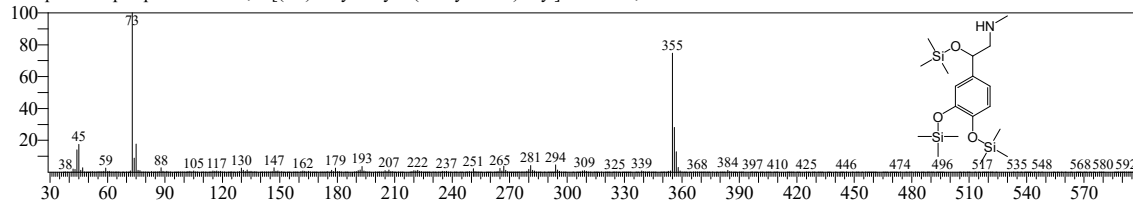

Hit#:4 Entry:203 Library:OA\_TMS\_DB5\_67min\_V3.lib

SI:37 Formula:C13H23NO2Si2 CAS:118-92-3 MolWeight:281 RetIndex:1623

CompName:Anthranilic acid-2TMS ; 2-aminobenzoic acid

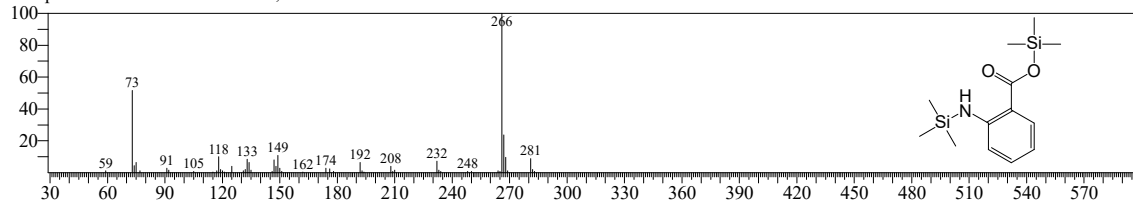

Hit#:5 Entry:211 Library:OA\_TMS\_DB5\_67min\_V3.lib

SI:36 Formula:C13H22O3Si2 CAS:99-96-7 MolWeight:282 RetIndex:1636

CompName:4-Hydroxybenzoic acid-2TMS ; 4-hydroxybenzoic acid

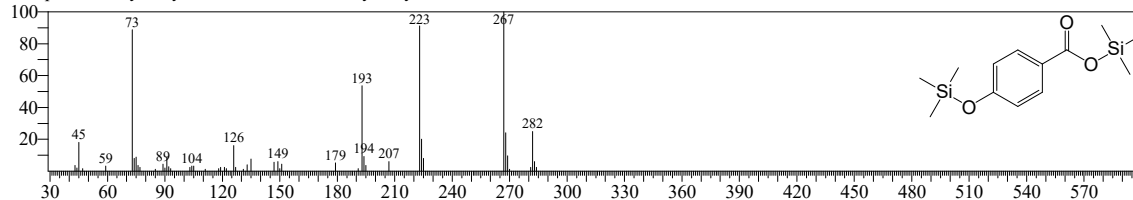

# TNAU

<< Target >>

Line#:17 R.Time:31.860(Scan#:5473) MassPeaks:273

RawMode:Averaged 31.855-31.865(5472-5474) BasePeak:207.05(1534)

BG Mode:Calc. from Peak Group 1 - Event 1 Q3 Scan

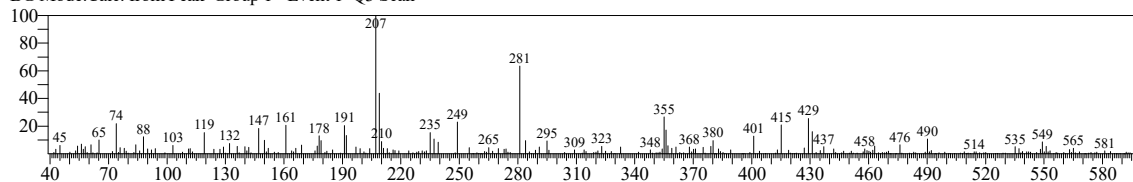

Hit#:1 Entry:402 Library:OA\_TMS\_DB5\_67min\_V3.lib

SI:36 Formula:C20H42O4Si4 CAS:775-01-9 MolWeight:458 RetIndex:1942

CompName:3,4-Dihydroxymandelic acid-4TMS ; 2-(3,4-dihydroxyphenyl)-2-hydroxyacetic acid

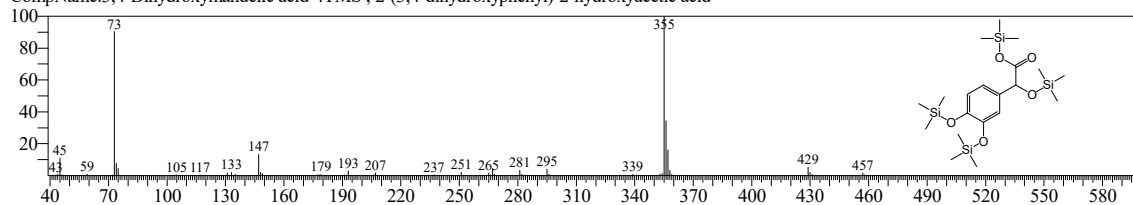

Hit#:2 Entry:382 Library:OA\_TMS\_DB5\_67min\_V3.lib

SI:31 Formula:C18H34O4Si3 CAS:6482-98-0 MolWeight:398 RetIndex:1918

CompName:4-Hydroxyphenyllactic acid-3TMS ; 2-hydroxy-3-(4-hydroxyphenyl)propanoate

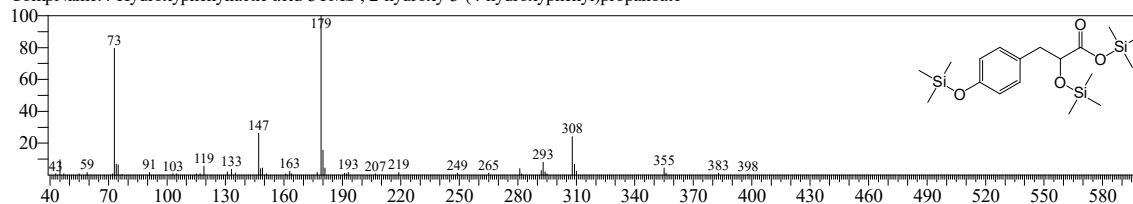

Hit#:3 Entry:13 Library:OA\_TMS\_DB5\_67min\_V3.lib

SI:25 Formula:C8H20O3Si2 CAS:79-14-1 MolWeight:220 RetIndex:1074

CompName:Glycolic acid-2TMS ; 2-hydroxyacetic acid

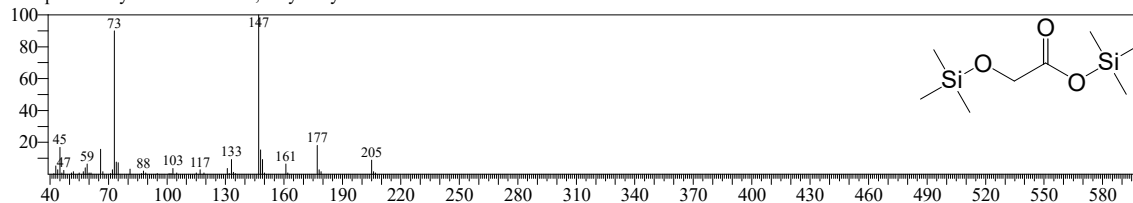

Hit#:4 Entry:395 Library:OA\_TMS\_DB5\_67min\_V3.lib

SI:25 Formula:C10H16N4O2Si CAS:58-55-9 MolWeight:252 RetIndex:1936

CompName:Theophylline-TMS ; 1,3-dimethyl-7H-purine-2,6-dione

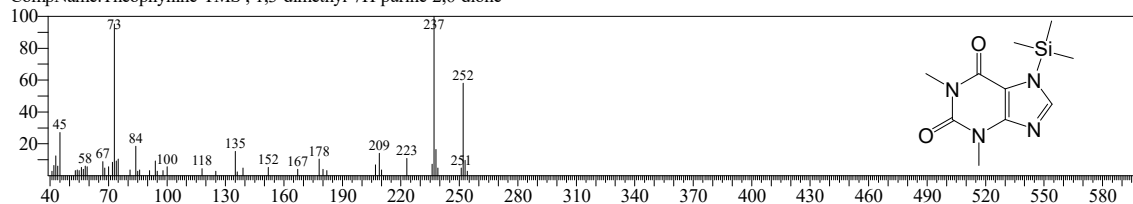

Hit#:5 Entry:142 Library:OA\_TMS\_DB5\_67min\_V3.lib

SI:23 Formula:C10H15NO2Si CAS:118-92-3 MolWeight:209 RetIndex:1495

CompName:Anthranilic acid-TMS ; 2-aminobenzoic acid

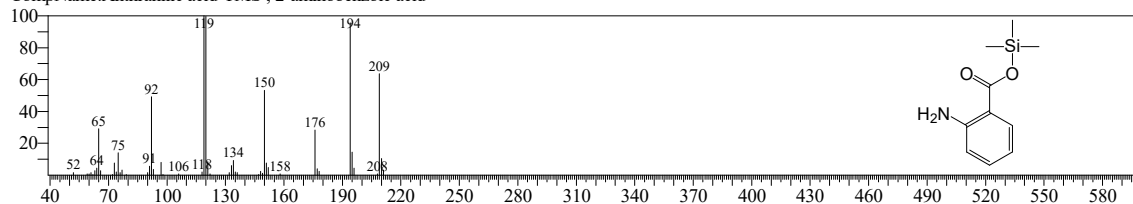

<< Target >>

Line#:18 R.Time:31.900(Scan#:5481) MassPeaks:351

RawMode:Averaged 31.895-31.905(5480-5482) BasePeak:139.20(1427)

BG Mode:Calc. from Peak Group 1 - Event 1 Q3 Scan

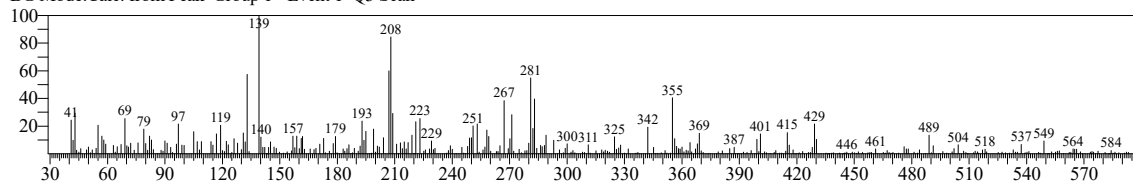

Hit#:1 Entry:211 Library:OA\_TMS\_DB5\_67min\_V3.lib

SI:28 Formula:C<sub>13</sub>H<sub>22</sub>O<sub>3</sub>Si<sub>2</sub> CAS:99-96-7 MolWeight:282 RetIndex:1636

CompName:4-Hydroxybenzoic acid-2TMS ; 4-hydroxybenzoic acid

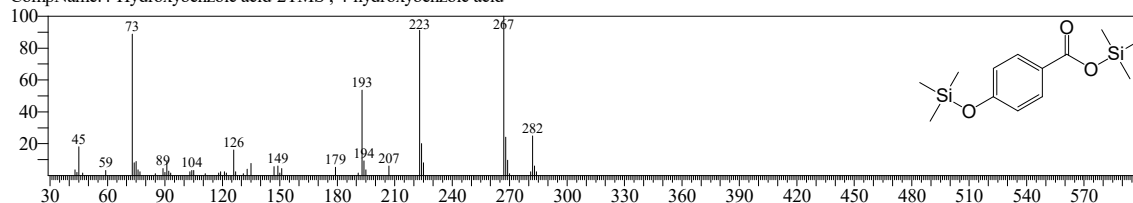

Hit#:2 Entry:179 Library:OA\_TMS\_DB5\_67min\_V3.lib

SI:27 Formula:C<sub>13</sub>H<sub>22</sub>O<sub>3</sub>Si<sub>2</sub> CAS:99-06-9 MolWeight:282 RetIndex:1572

CompName:3-Hydroxybenzoic acid-2TMS ; 3-hydroxybenzoic acid

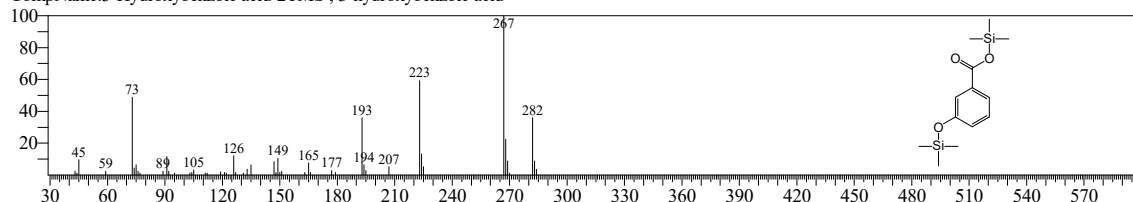

Hit#:3 Entry:15 Library:FA\_ME\_SP2560\_EI\_V3.lib

SI:27 Formula:C<sub>18</sub>H<sub>34</sub>O<sub>2</sub> CAS:29743-97-3 MolWeight:282 RetIndex:2581

CompName:Methyl cis-10-heptadecenoate ; Heptadec-10-enoic acid

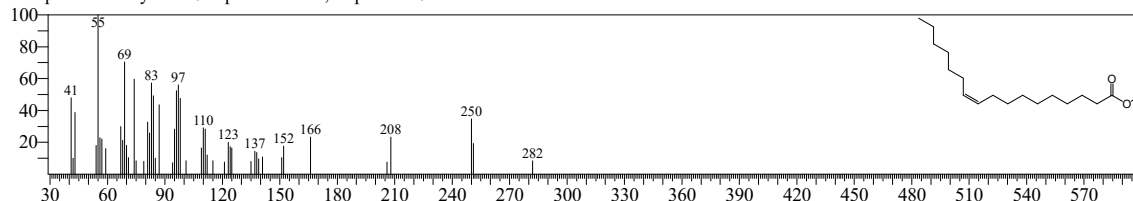

Hit#:4 Entry:24 Library:FA\_ME\_SP2560\_EI\_V3.lib

SI:25 Formula:C<sub>21</sub>H<sub>40</sub>O<sub>2</sub> CAS:5561-99-9 MolWeight:324 RetIndex:2874

CompName:Methyl cis-11-icosenoate ; Icos-11-enoic acid

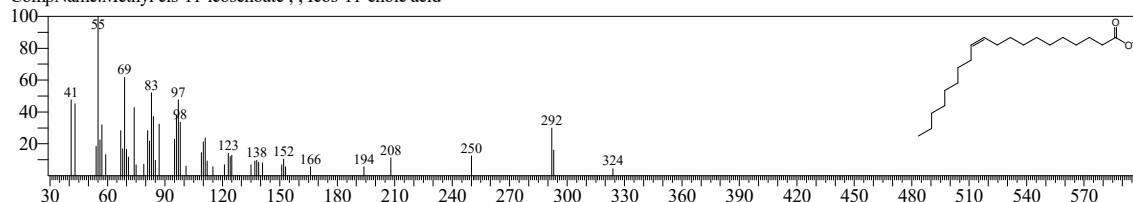

Hit#:5 Entry:315 Library:OA\_TMS\_DB5\_67min\_V3.lib

SI:24 Formula:C<sub>16</sub>H<sub>30</sub>O<sub>4</sub>Si<sub>3</sub> CAS:99-50-3 MolWeight:370 RetIndex:1833

CompName:Protocatechuic acid-3TMS ; 3,4-dihydroxybenzoic acid

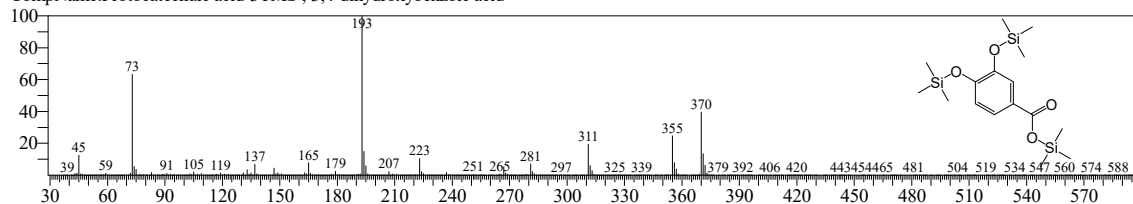

# TNAU

<< Target >>

Line#:19 R.Time:31.970(Scan#:5495) MassPeaks:268

RawMode:Averaged 31.965-31.975(5494-5496) BasePeak:208.05(1068)

BG Mode:Calc. from Peak Group 1 - Event 1 Q3 Scan

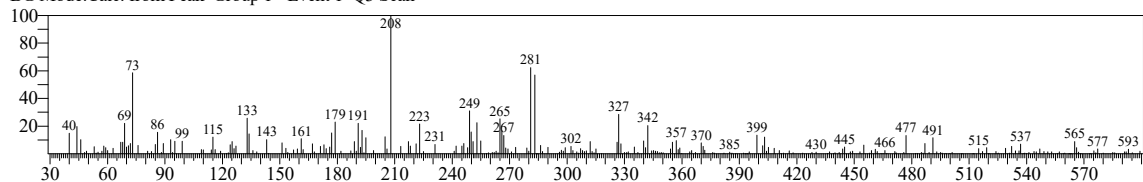

Hit#:1 Entry:203 Library:OA\_TMS\_DB5\_67min\_V3.lib

SI:35 Formula:C13H23NO2Si2 CAS:118-92-3 MolWeight:281 RetIndex:1623

CompName:Anthranilic acid-2TMS ; 2-aminobenzoic acid

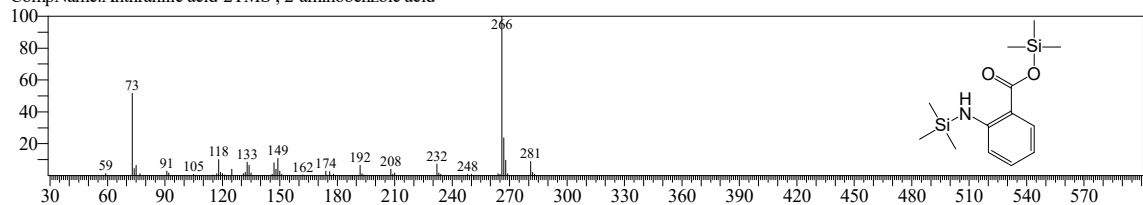

Hit#:2 Entry:328 Library:OA\_TMS\_DB5\_67min\_V3.lib

SI:35 Formula:C13H23NO2Si2 CAS:150-13-0 MolWeight:281 RetIndex:1845

CompName:4-Aminobenzoic acid-2TMS ; 4-aminobenzoic acid

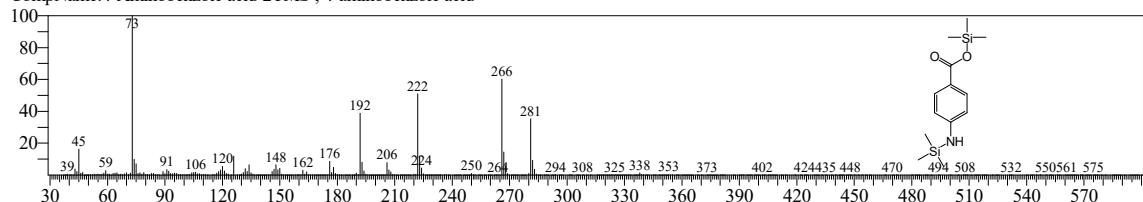

Hit#:3 Entry:310 Library:OA\_TMS\_DB5\_67min\_V3.lib

SI:35 Formula:C11H20N4OSi2 CAS:68-94-0 MolWeight:280 RetIndex:1822

CompName:Hypoxanthine-2TMS ; 3,7-dihydropurin-6-one

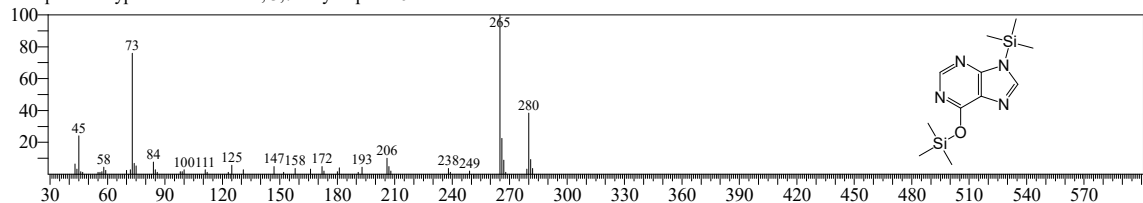

Hit#:4 Entry:211 Library:OA\_TMS\_DB5\_67min\_V3.lib

SI:32 Formula:C13H22O3Si2 CAS:99-96-7 MolWeight:282 RetIndex:1636

CompName:4-Hydroxybenzoic acid-2TMS ; 4-hydroxybenzoic acid

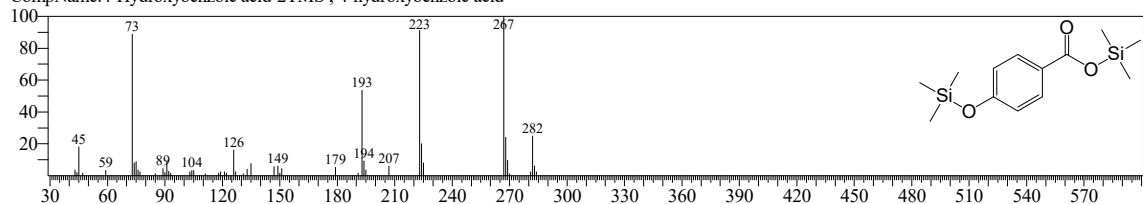

Hit#:5 Entry:315 Library:OA\_TMS\_DB5\_67min\_V3.lib

SI:32 Formula:C16H30O4Si3 CAS:99-50-3 MolWeight:370 RetIndex:1833

CompName:Protocatechuic acid-3TMS ; 3,4-dihydroxybenzoic acid

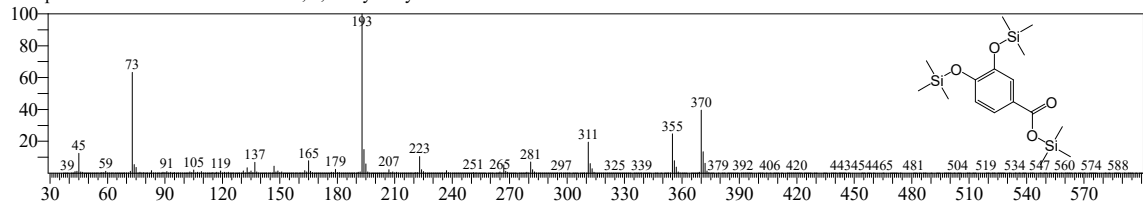

# TNAU

<< Target >>

Line#:20 R.Time:32.305(Scan#:5562) MassPeaks:277

RawMode:Averaged 32.300-32.310(5561-5563) BasePeak:207.05(891)

BG Mode:Calc. from Peak Group 1 - Event 1 Q3 Scan

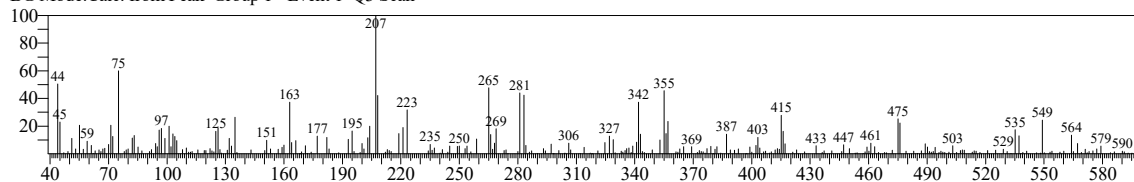

Hit#:1 Entry:402 Library:OA\_TMS\_DB5\_67min\_V3.lib

SI:28 Formula:C<sub>20</sub>H<sub>42</sub>O<sub>4</sub>Si<sub>4</sub> CAS:775-01-9 MolWeight:458 RetIndex:1942

CompName:3,4-Dihydroxymandelic acid-4TMS ; 2-(3,4-dihydroxyphenyl)-2-hydroxyacetic acid

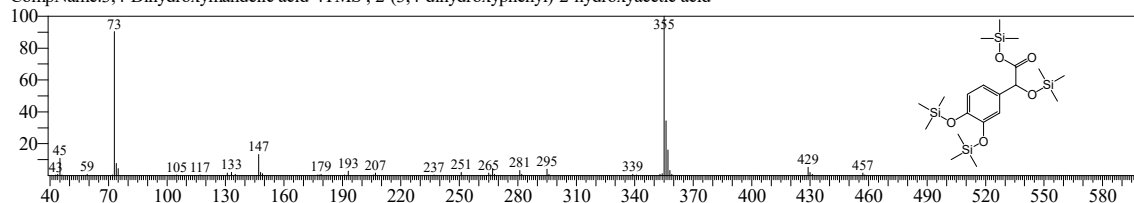

Hit#:2 Entry:310 Library:OA\_TMS\_DB5\_67min\_V3.lib

SI:27 Formula:C<sub>11</sub>H<sub>20</sub>N<sub>4</sub>O<sub>2</sub>Si<sub>2</sub> CAS:68-94-0 MolWeight:280 RetIndex:1822

CompName:Hypoxanthine-2TMS ; 3,7-dihydropurin-6-one

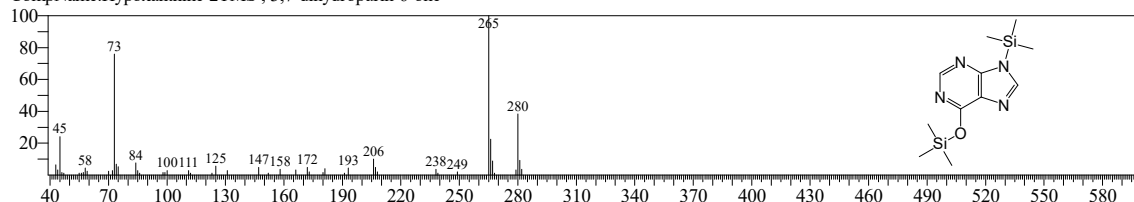

Hit#:3 Entry:477 Library:OA\_TMS\_DB5\_67min\_V3.lib

SI:27 Formula:C<sub>21</sub>H<sub>46</sub>O<sub>2</sub>Si<sub>2</sub> CAS:112-92-5 MolWeight:342 RetIndex:2156

CompName:Octadecanol-TMS ; octadecan-1-ol

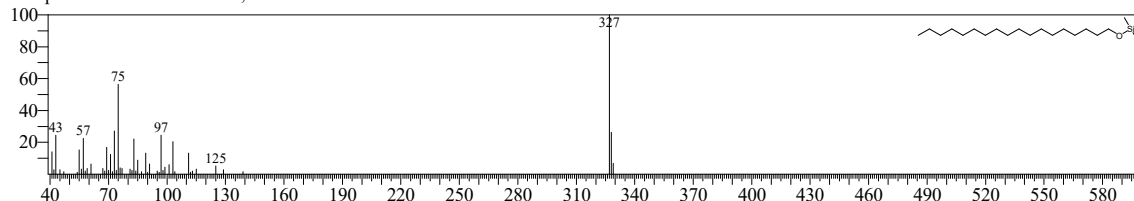

Hit#:4 Entry:456 Library:OA\_TMS\_DB5\_67min\_V3.lib

SI:21 Formula:C<sub>18</sub>H<sub>33</sub>NO<sub>3</sub>Si<sub>2</sub> CAS:37350-58-6 MolWeight:339 RetIndex:2094

CompName:Metoprolol-TMS ; 1-[4-(2-methoxyethyl)phenoxy]-3-(propan-2-ylamino)propan-2-ol

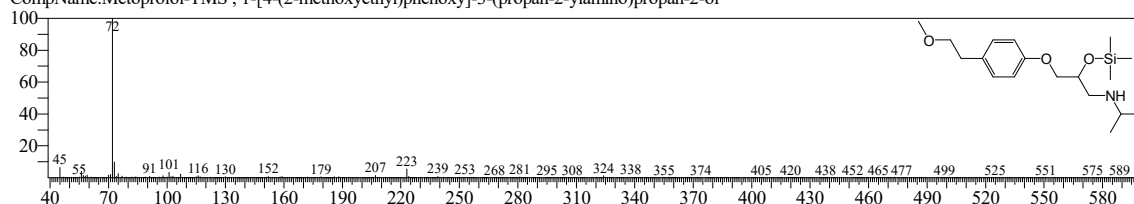

Hit#:5 Entry:361 Library:OA\_TMS\_DB5\_67min\_V3.lib

SI:21 Formula:C<sub>9</sub>H<sub>14</sub>N<sub>2</sub>O<sub>2</sub>Si<sub>2</sub> CAS:104-98-3 MolWeight:210 RetIndex:1896

CompName:Urocanic acid-TMS ; (E)-3-(1H-imidazol-5-yl)prop-2-enoic acid

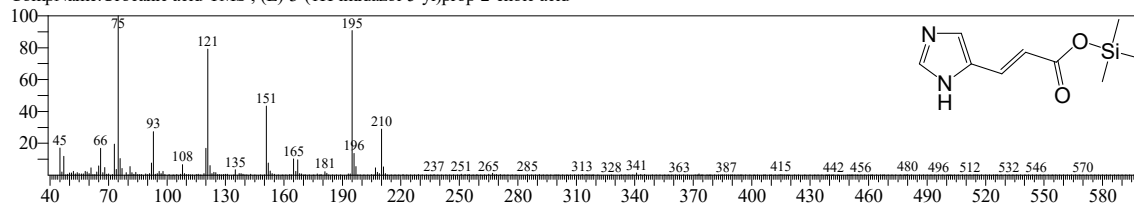

# TNAU

<< Target >>

Line#:21 R.Time:32.850(Scan#:5671) MassPeaks:301

RawMode:Averaged 32.845-32.855(5670-5672) BasePeak:209.10(626)

BG Mode:Calc. from Peak Group 1 - Event 1 Q3 Scan

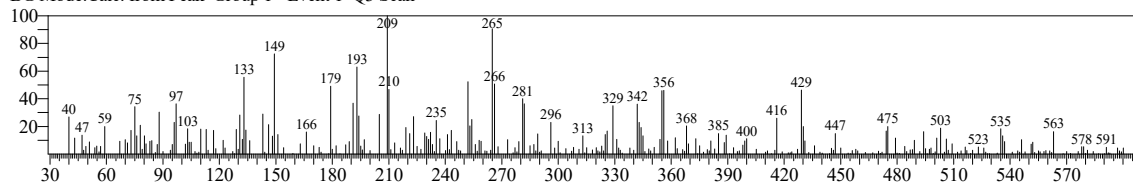

Hit#:1 Entry:402 Library:OA TMS DB5 67min V3.lib

SI:33 Formula:C20H42O4Si4 CAS:775-01-9 MolWeight:458 RetIndex:1942

CompName:3,4-Dihydroxymandelic acid-4TMS ; 2-(3,4-dihydroxyphenyl)-2-hydroxyacetic acid

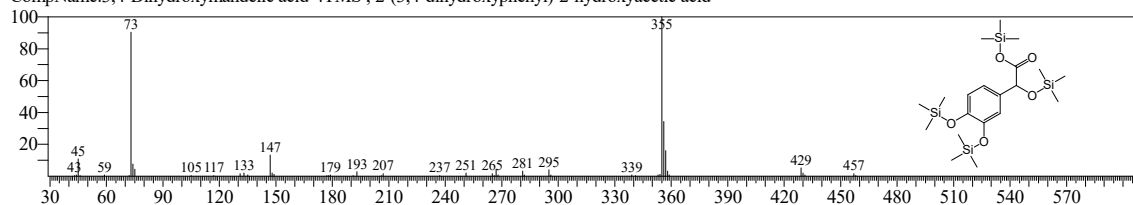

Hit#:2 Entry:368 Library:OA TMS DB5 67min V3.lib

SI:31 Formula:C17H35NO2Si3 CAS:1196-92-5 MolWeight:369 RetIndex:1899

CompName:Vanillylamine-3TMS ; 4-(aminomethyl)-2-methoxyphenol

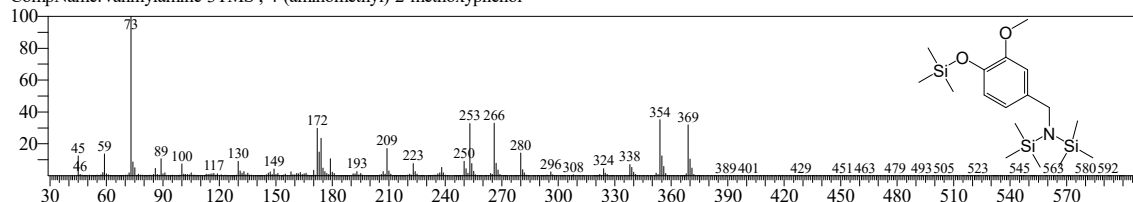

Hit#:3 Entry:343 Library:OA TMS DB5 67min V3.lib

SI:31 Formula:C18H37NO3Si3 CAS:51-43-4 MolWeight:399 RetIndex:1868

CompName:Epinephrine-3TMS ; 4-[(1R)-1-hydroxy-2-(methylamino)ethyl]benzene-1,2-diol

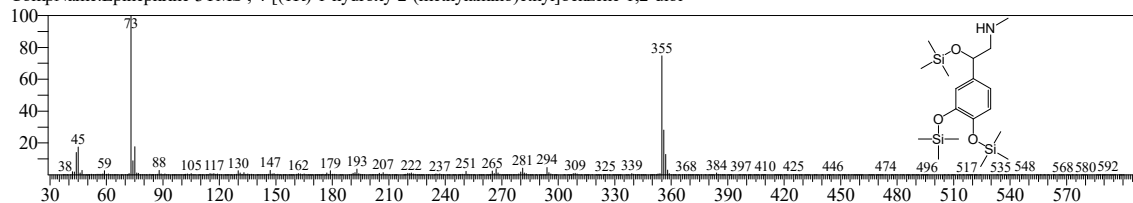

Hit#:4 Entry:203 Library:OA TMS DB5 67min V3.lib

SI:30 Formula:C13H23NO2Si2 CAS:118-92-3 MolWeight:281 RetIndex:1623

CompName:Anthranilic acid-2TMS ; 2-aminobenzoic acid

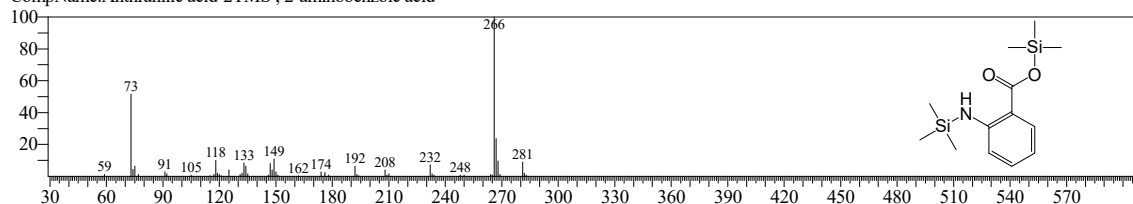

Hit#:5 Entry:420 Library:OA TMS DB5 67min V3.lib

SI:28 Formula:C18H33NO4Si3 CAS:487-54-7 MolWeight:411 RetIndex:1973

CompName:2-Hydroxyhippuric acid-3TMS ; 2-[(2-hydroxybenzoyl)amino]acetic acid

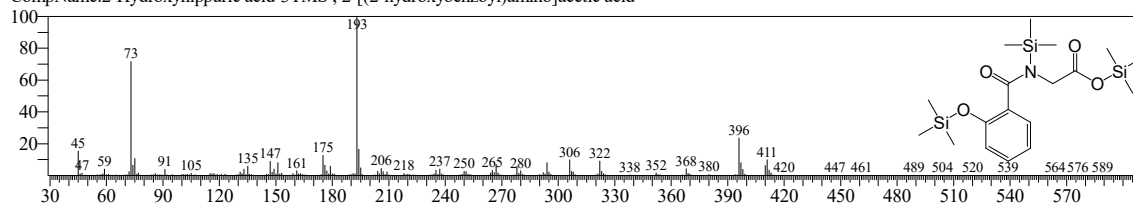

Supplement: Supplementary file 54 [file supplementary]
