# Supplementary material for: Comparative Metabolomics Profiling Reveals Key Metabolites and Associated Pathways Regulating Tuber Dormancy in White Yam (<em>Dioscorea rotundata</em>)
Source: Preprints.org preprint supplement (doi:10.20944/preprints202303.0378.v1), 2023-03-21

# TNAU

## Sample Information

Analyzed by : Admin  
 Analyzed : 02-Sep-22 1:29:23 AM  
 Sample Type : Unknown  
 Level # : 1  
 Sample Name : Sample  
 Sample ID : 3-3  
 IS Amount : [1]=1  
 Sample Amount : 1  
 Dilution Factor : 1  
 Vial # : 4  
 Injection Volume : 2.00  
 Data File : D:\GCMS-8040NX\Sep 2022\Users\01.09.2022\01092022010.qgd  
 Org Data File : D:\GCMS-8040NX\Sep 2022\Users\01.09.2022\01092022010.qgd  
 Method File : D:\GCMS-8040NX\Sep 2022\Method\Scan\_methodfile.qgm  
 Org Method File : D:\GCMS-8040NX\Sep 2022\Method\Scan\_methodfile.qgm  
 Report File :  
 Tuning File : D:\GCMS-8040NX\Aug 2022\Tuning Data\TUNING 25082022.qgt  
 Modified by : Admin  
 Modified : 05-Sep-22 10:59:08 AM

Chromatogram Sample D:\GCMS-8040NX\Sep 2022\Users\01.09.2022\01092022010.qgd

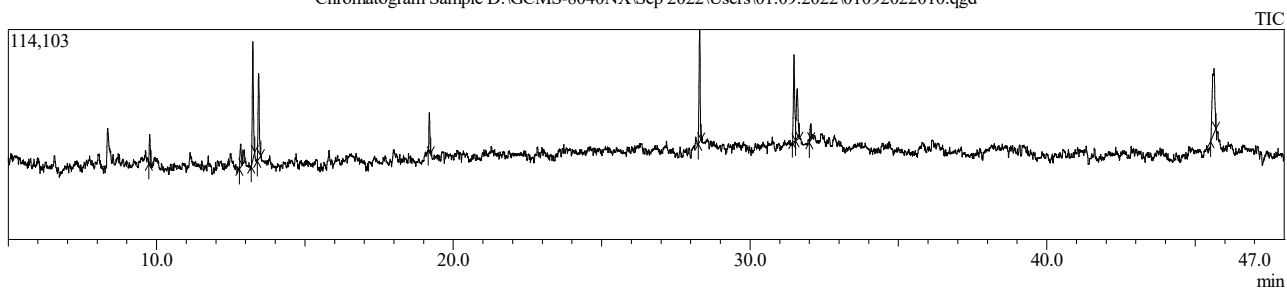

Peak Report TIC

| Peak# | R.Time | Area    | Area%  | Height | Height% | A/H  | Similarity | Name                                      |
|-------|--------|---------|--------|--------|---------|------|------------|-------------------------------------------|
| 1     | 9.768  | 38728   | 3.56   | 16431  | 4.82    | 2.36 | 93         | Pentasiloxane, dodecamethyl-              |
| 2     | 12.833 | 38466   | 3.53   | 12518  | 3.67    | 3.07 | 23         | Methyl cis-5,8,11,14,17-Eicosapentaenoate |
| 3     | 13.243 | 175617  | 16.13  | 64601  | 18.95   | 2.72 | 53         | Methyl cis-13,16-Docosadienate            |
| 4     | 13.438 | 133167  | 12.23  | 46563  | 13.66   | 2.86 | 52         | Methyl cis-13,16-Docosadienate            |
| 5     | 19.193 | 44535   | 4.09   | 21012  | 6.16    | 2.12 | 93         | 2,4-Di-tert-butylphenoxytrimethylsilane   |
| 6     | 28.303 | 162628  | 14.93  | 60900  | 17.86   | 2.67 | 95         | n-Hexadecanoic acid                       |
| 7     | 31.481 | 148990  | 13.68  | 46976  | 13.78   | 3.17 | 95         | 10E,12Z-Octadecadienoic acid              |
| 8     | 31.589 | 110565  | 10.15  | 27659  | 8.11    | 4.00 | 86         | 7-Tetradecenal, (Z)-                      |
| 9     | 32.037 | 20458   | 1.88   | 9001   | 2.64    | 2.27 | 85         | Octadecanoic acid                         |
| 10    | 45.633 | 215778  | 19.82  | 35291  | 10.35   | 6.11 | 91         | Diosgenin                                 |
|       |        | 1088932 | 100.00 | 340952 | 100.00  |      |            |                                           |

Library

# TNAU

<< Target >>

Line#:1 R.Time:9.770(Scan#:955) MassPeaks:374  
RawMode:Averaged 9.765-9.775(954-956) BasePeak:281.05(3518)  
BG Mode:Calc. from Peak Group 1 - Event 1 Q3 Scan

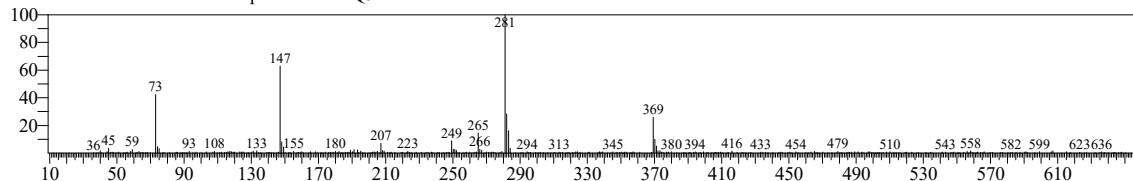

Hit#:1 Entry:40975 Library:NIST20R.lib

SI:93 Formula:C<sub>12</sub>H<sub>36</sub>O<sub>4</sub>Si<sub>5</sub> CAS:141-63-9 MolWeight:384 RetIndex:1068

CompName:Pentasiloxane, dodecamethyl- \$\$ Dodecamethylpentasiloxane \$\$ 1,1,1,3,3,5,5,7,7,9,9-Dodecamethylpentasiloxane #

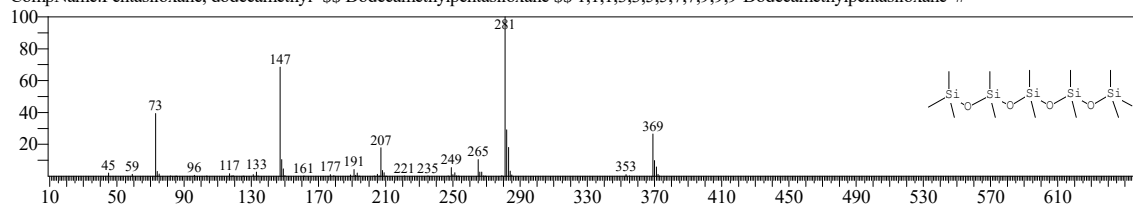

Hit#:2 Entry:249272 Library:NIST20M1.lib

SI:82 Formula:C<sub>12</sub>H<sub>36</sub>O<sub>4</sub>Si<sub>5</sub> CAS:3555-47-3 MolWeight:384 RetIndex:1068

CompName:Trisiloxane, 1,1,1,5,5,5-hexamethyl-3,3-bis[(trimethylsilyl)oxy]- \$\$ Tetrakis(trimethylsiloxy)silane \$\$ Trisiloxane, 1,1,1,5,5,5-hexamethyl-3,3-b

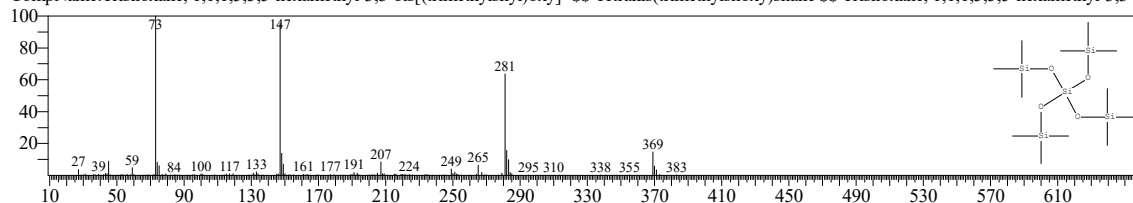

Hit#:3 Entry:27848 Library:NIST20M2.lib

SI:80 Formula:C<sub>18</sub>H<sub>48</sub>O<sub>4</sub>Si<sub>5</sub> CAS:0-00-0 MolWeight:468 RetIndex:1495

CompName:1,3,5,7,9-Pentasiloxane, 1,1,3,3,5,5,7,7,9,9-decamethyl-1,9-di(tert.butyl)-

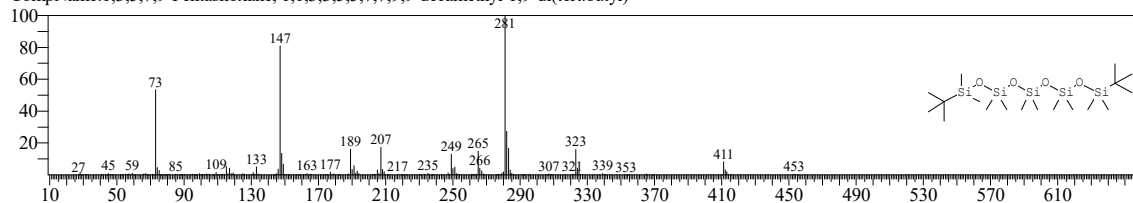

Hit#:4 Entry:249271 Library:NIST20M1.lib

SI:79 Formula:C<sub>12</sub>H<sub>36</sub>O<sub>4</sub>Si<sub>5</sub> CAS:38146-99-5 MolWeight:384 RetIndex:1068

CompName:1,1,1,3,5,5,7,7,7-Nonamethyl-3-(trimethylsiloxy)tetrasiloxane \$\$ 1,1,1,3,3,5,5,7,7-Nonamethyl-5-[(trimethylsilyl)oxy]tetrasiloxane #

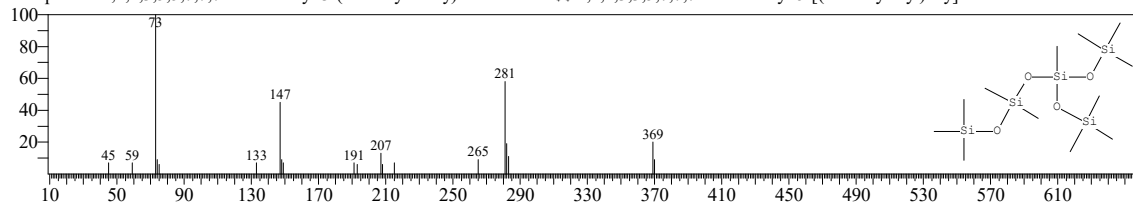

Hit#:5 Entry:158097 Library:NIST20M1.lib

SI:76 Formula:C<sub>14</sub>H<sub>24</sub>O<sub>3</sub>Si<sub>2</sub> CAS:0-00-0 MolWeight:296 RetIndex:1625

CompName:2,6-Dihydroxyacetophenone, 2TMS derivative \$\$ 2',6'-Dihydroxyacetophenone, bis(trimethylsilyl) ether

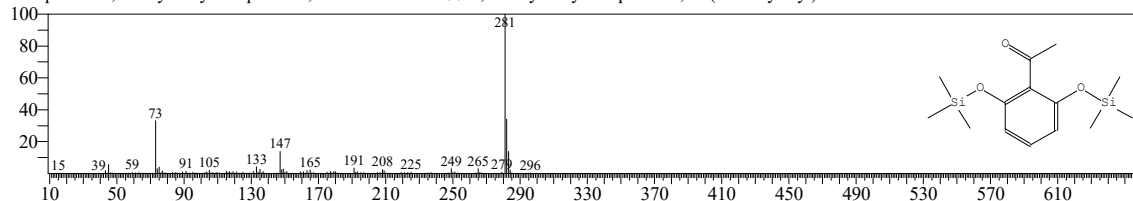

# TNAU

<< Target >>

Line#:2 R.Time:12.835(Scan#:1568) MassPeaks:429

RawMode:Averaged 12.830-12.840(1567-1569) BasePeak:138.05(2556)

BG Mode:Calc. from Peak Group 1 - Event 1 Q3 Scan

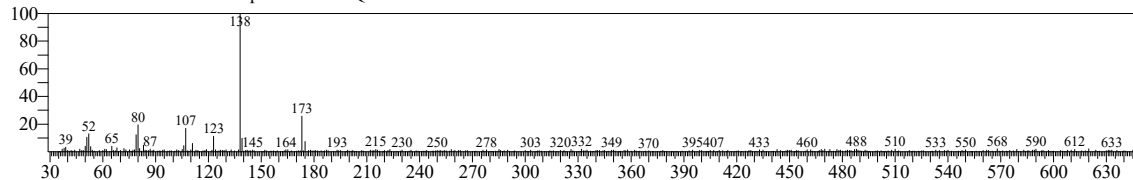

Hit#:1 Entry:36 Library:FA\_ME\_SP2560\_EI\_V3.lib

SI:23 Formula:C21H32O2 CAS:10417-94-4 MolWeight:316 RetIndex:3232

CompName:Methyl cis-5,8,11,14,17-Eicosapentaenoate ; Icosa-5,8,11,14,17-pentaenoic acid

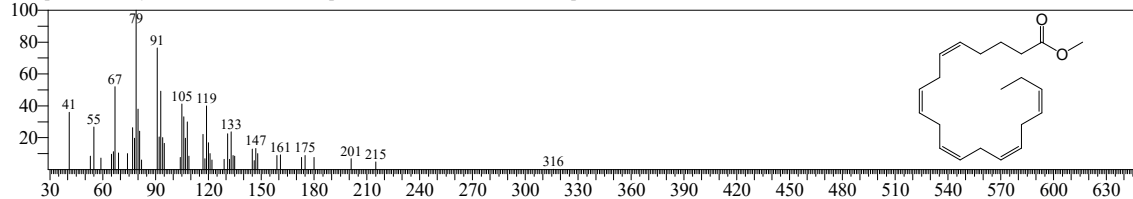

Hit#:2 Entry:25 Library:FA\_ME\_SP2560\_EI\_V3.lib

SI:23 Formula:C19H32O2 CAS:463-40-1 MolWeight:292 RetIndex:2892

CompName:Methyl linolenate ; (9Z,12Z,15Z)-octadeca-9,12,15-trienoic acid

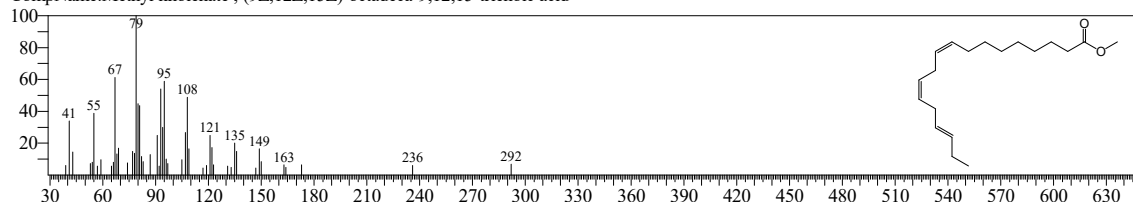

Hit#:3 Entry:27 Library:FA\_ME\_SP2560\_EI\_V3.lib

SI:21 Formula:C21H38O2 CAS:2091-39-6 MolWeight:322 RetIndex:2973

CompName:Methyl cis-11,14-Icosadienoate ; ; Icosa-11,14-dienoic acid

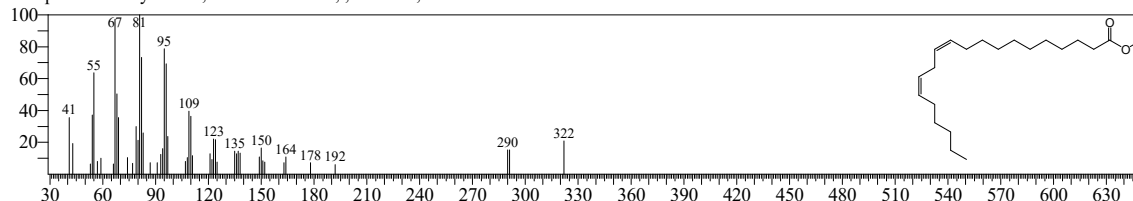

Hit#:4 Entry:33 Library:FA\_ME\_SP2560\_EI\_V3.lib

SI:21 Formula:C21H34O2 CAS:506-32-1 MolWeight:318 RetIndex:3109

CompName:Methyl arachidonate ; (5Z,8Z,11Z,14Z)-icosa-5,8,11,14-tetraenoic acid

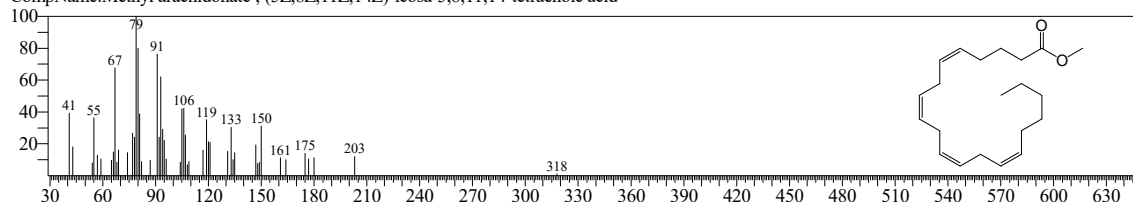

Hit#:5 Entry:23 Library:FA\_ME\_SP2560\_EI\_V3.lib

SI:21 Formula:C19H32O2 CAS:506-26-3 MolWeight:292 RetIndex:2852

CompName:Methyl gamma-linolenate ; ; Octadeca-6,9,12-trienoic acid

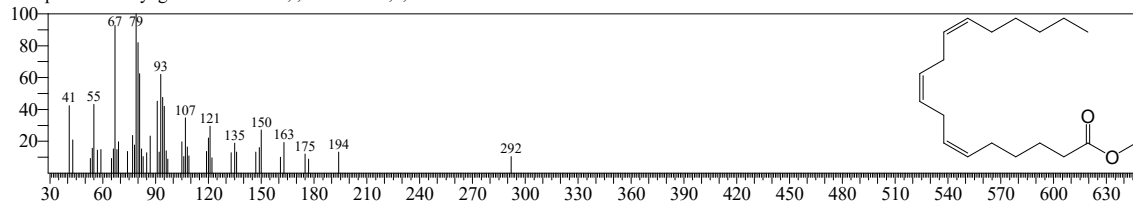

# TNAU

<< Target >>

Line#3 R.Time:13.240(Scan#:1649) MassPeaks:328

RawMode:Averaged 13.235-13.245(1648-1650) BasePeak:155.05(10593)

BG Mode:Calc. from Peak Group 1 - Event 1 Q3 Scan

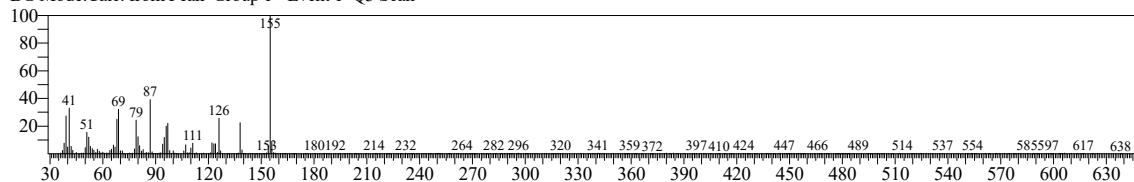

Hit#:1 Entry:34 Library:FA\_ME\_SP2560\_EI\_V3.lib

SI:53 Formula:C23H42O2 CAS:7370-49-2 MolWeight:350 RetIndex:3169

CompName:Methyl cis-13,16-Docosadienate ; (13Z,16E)-docosa-13,16-dienoic acid

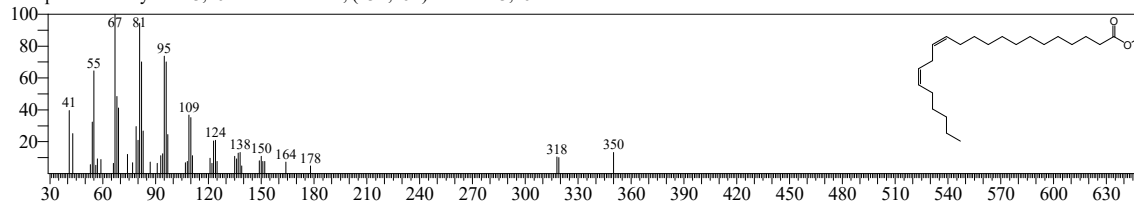

Hit#:2 Entry:21 Library:FA\_ME\_SP2560\_EI\_V3.lib

SI:52 Formula:C19H34O2 CAS:60-33-3 MolWeight:294 RetIndex:2775

CompName:Methyl linoleate ; Octadeca-9,12-dienoic acid

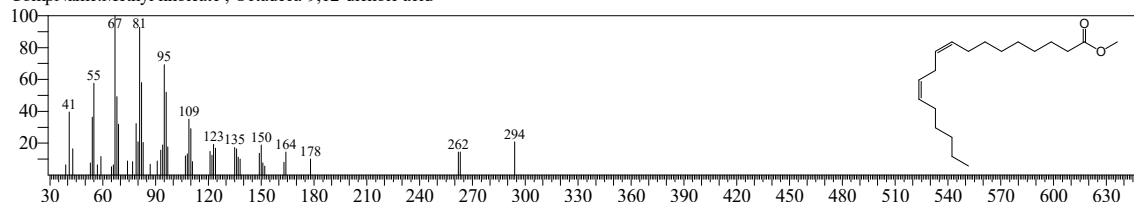

Hit#:3 Entry:20 Library:FA\_ME\_SP2560\_EI\_V3.lib

SI:52 Formula:C19H34O2 CAS:506-21-8 MolWeight:294 RetIndex:2727

CompName:Methyl linolelaidate ; (9E,12E)-octadeca-9,12-dienoic acid

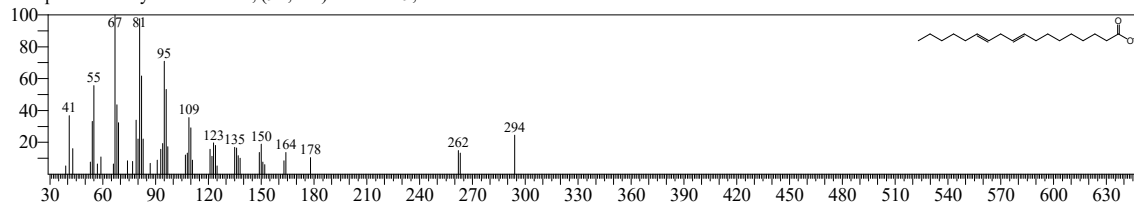

Hit#:4 Entry:27 Library:FA\_ME\_SP2560\_EI\_V3.lib

SI:51 Formula:C21H38O2 CAS:2091-39-6 MolWeight:322 RetIndex:2973

CompName:Methyl cis-11,14-Icosadienoate ; Icosa-11,14-dienoic acid

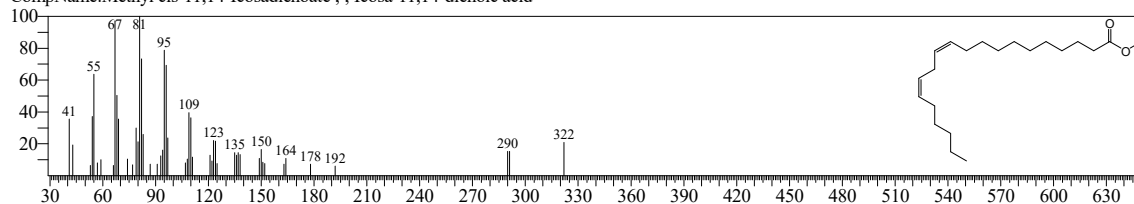

Hit#:5 Entry:11 Library:FA\_ME\_SP2560\_EI\_V3.lib

SI:51 Formula:C16H30O2 CAS:84743-29-3 MolWeight:254 RetIndex:2388

CompName:Methyl cis-10-pentadecenoate ; (Z)-pentadec-10-enoic acid

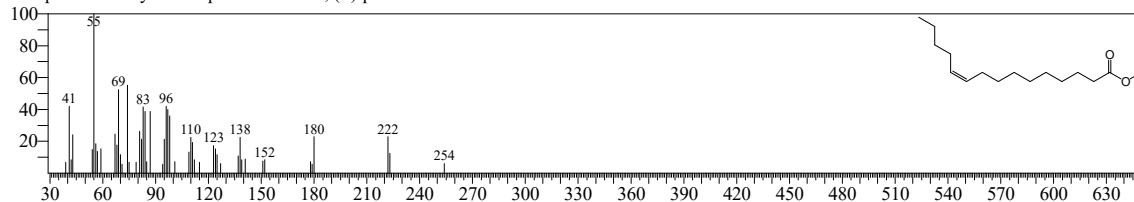

# TNAU

<< Target >>

Line#:4 R.Time:13.440(Scan#:1689) MassPeaks:362

RawMode:Averaged 13.435-13.445(1688-1690) BasePeak:155.05(7264)

BG Mode:Calc. from Peak Group 1 - Event 1 Q3 Scan

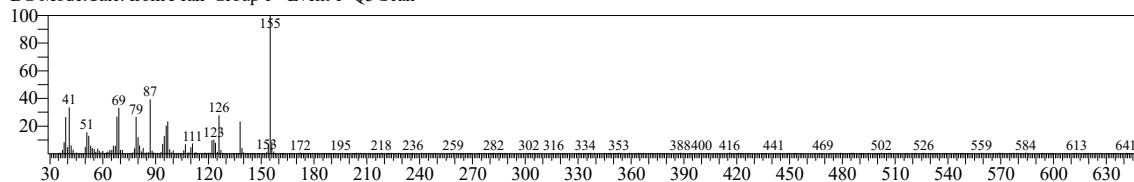

Hit#:1 Entry:34 Library:FA\_ME\_SP2560\_EI\_V3.lib

SI:52 Formula:C23H42O2 CAS:7370-49-2 MolWeight:350 RetIndex:3169

CompName:Methyl cis-13,16-Docosadienate ; (13Z,16E)-docosa-13,16-dienoic acid



Hit#:2 Entry:11 Library:FA\_ME\_SP2560\_EI\_V3.lib

SI:51 Formula:C16H30O2 CAS:84743-29-3 MolWeight:254 RetIndex:2388

CompName:Methyl cis-10-pentadecenoate ; (Z)-pentadec-10-enoic acid

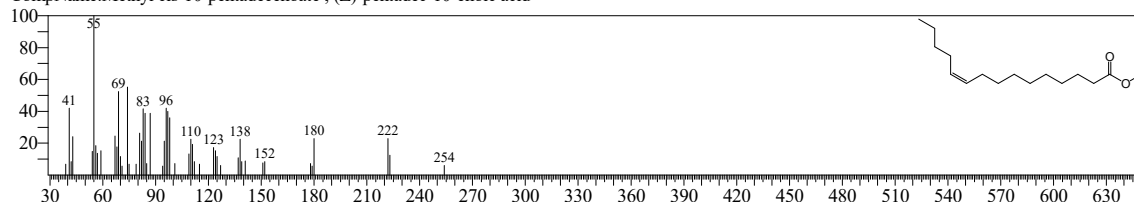

Hit#:3 Entry:21 Library:FA\_ME\_SP2560\_EI\_V3.lib

SI:51 Formula:C19H34O2 CAS:60-33-3 MolWeight:294 RetIndex:2775

CompName:Methyl linoleate ; Octadeca-9,12-dienoic acid

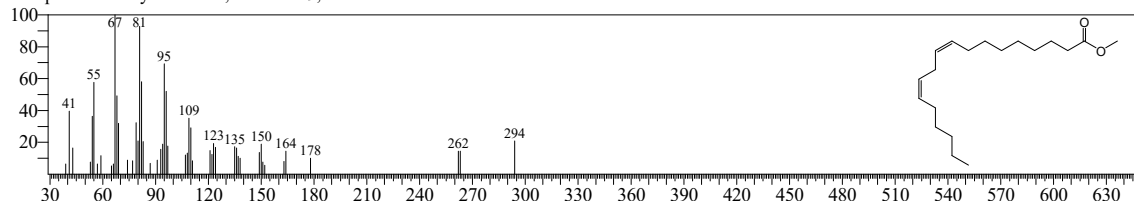

Hit#:4 Entry:20 Library:FA\_ME\_SP2560\_EI\_V3.lib

SI:50 Formula:C19H34O2 CAS:506-21-8 MolWeight:294 RetIndex:2727

CompName:Methyl linoleidate ; (9E,12E)-octadeca-9,12-dienoic acid

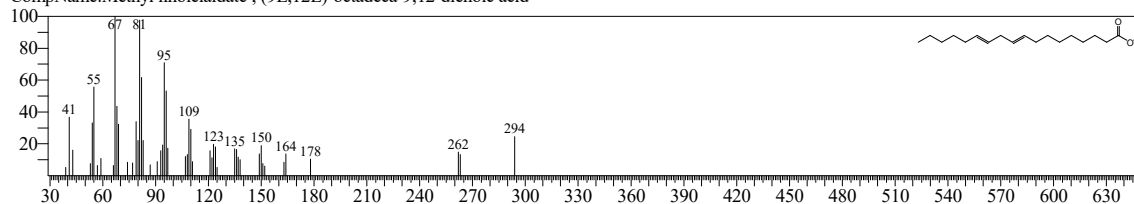

Hit#:5 Entry:27 Library:FA\_ME\_SP2560\_EI\_V3.lib

SI:50 Formula:C21H38O2 CAS:2091-39-6 MolWeight:322 RetIndex:2973

CompName:Methyl cis-11,14-Icosadienoate ; ; Icosa-11,14-dienoic acid

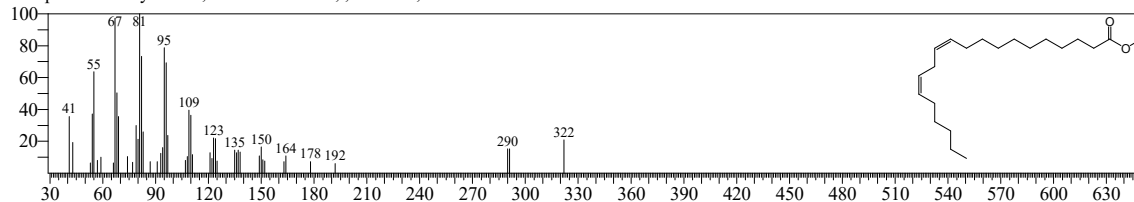

# TNAU

<< Target >>

Line#5 R.Time:19.195(Scan#:2840) MassPeaks:304

RawMode:Averaged 19.190-19.200(2839-2841) BasePeak:263.15(9581)

BG Mode:Calc. from Peak Group 1 - Event 1 Q3 Scan

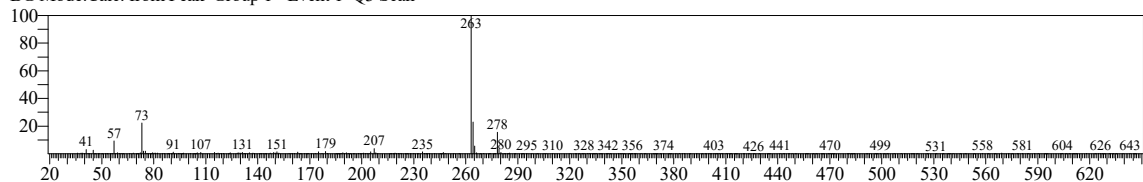

Hit#:1 Entry:33874 Library:NIST20R.lib

SI:93 Formula:C17H30OSi CAS:53925-65-8 MolWeight:278 RetIndex:1632

CompName:2,4-Di-tert-butylphenoxytrimethylsilane \$\$\$\$ Benzene, 2,4-bis(1,1-dimethylethyl)-1-[(trimethylsilyl)oxy]- \$\$\$\$ Silane, [2,4-bis(1,1-dimethylethyl)ph

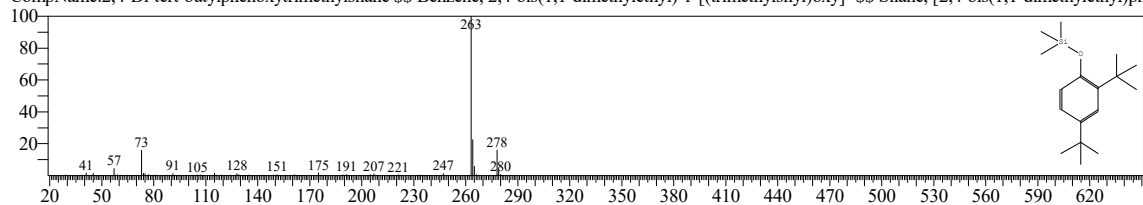

Hit#:2 Entry:33871 Library:NIST20R.lib

SI:85 Formula:C17H30OSi CAS:10416-73-6 MolWeight:278 RetIndex:1632

CompName:2,6-Bis(tert-butyl)phenol, TMS derivative \$\$\$\$ Trimethyl(2,6 ditert-butylphenoxy)silane \$\$\$\$ (2,6-Ditert-butylphenoxy)(trimethyl)silane #

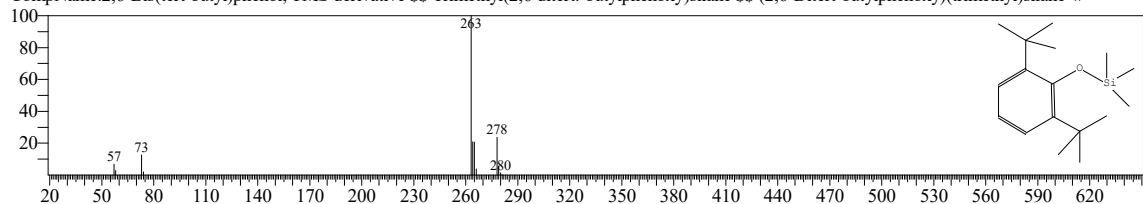

Hit#:3 Entry:136557 Library:NIST20M1.lib

SI:83 Formula:C12H22N4Si2 CAS:0-00-0 MolWeight:278 RetIndex:1703

CompName:3-Deazaadenine, 2TMS \$\$\$\$ 3-Deazaadenine, N,N'-bis-TMS \$\$\$\$ 1H-Imidazo[4,5-c]pyridin-4-amine, N,N'-bis-TMS

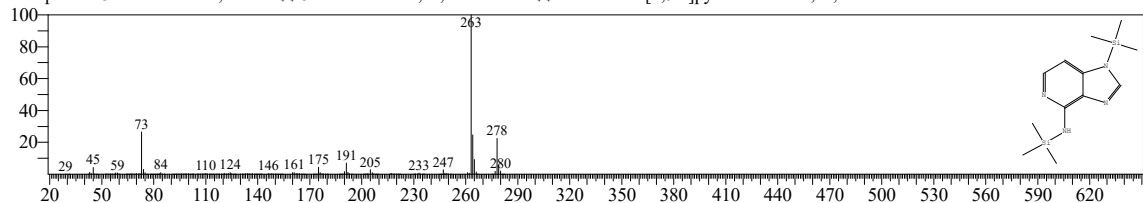

Hit#:4 Entry:136556 Library:NIST20M1.lib

SI:80 Formula:C12H22N4Si2 CAS:0-00-0 MolWeight:278 RetIndex:1606

CompName:1H,1'H-2,2'-Biimidazole, 2TMS \$\$\$\$ 1H,1'H-2,2'-Biimidazole, N,N'-bis-TMS \$\$\$\$ 1H,1'H-[2,2']Biimidazolyl, 2TMS \$\$\$\$ 2,2'-Bi-1H-imidazole, 2TMS

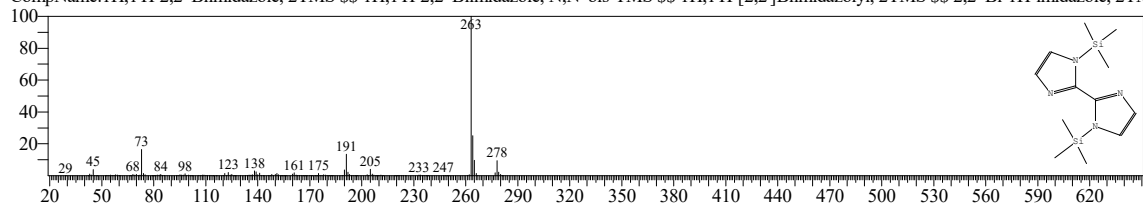

Hit#:5 Entry:259338 Library:NIST20M1.lib

SI:79 Formula:C23H30O4Si CAS:0-00-0 MolWeight:398 RetIndex:2735

CompName:2-[1-(1,3-benzodioxol-5-yl)propan-2-yl]-6-methoxy-4-prop-2-enylphenol, TMS derivative \$\$\$\$ 2-[1-(1,3-Benzodioxol-5-yl)propan-2-yl]-6-metho

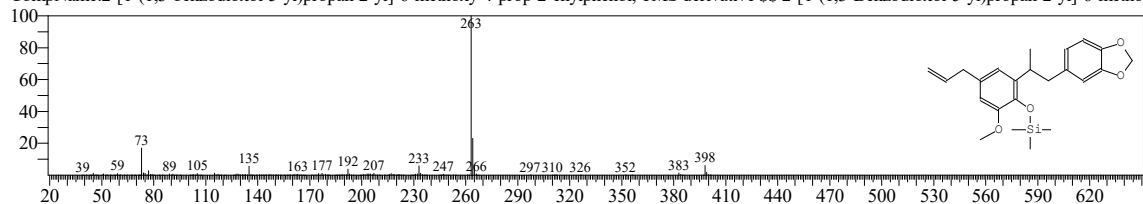

# TNAU

<< Target >>

Line#6 R.Time:28.305(Scan#:4662) MassPeaks:353

RawMode:Averaged 28.300-28.310(4661-4663) BasePeak:73.05(5070)

BG Mode:Calc. from Peak Group 1 - Event 1 Q3 Scan

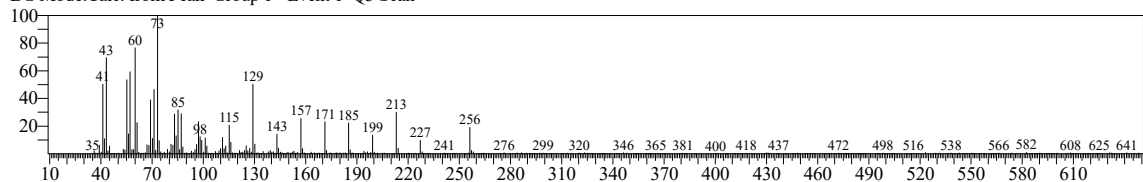

Hit#1 Entry:31600 Library:NIST20R.lib

SI:95 Formula:C16H32O2 CAS:57-10-3 MolWeight:256 RetIndex:1968

CompName:n-Hexadecanoic acid \$ Hexadecanoic acid \$ n-Hexadecic acid \$ Palmitic acid \$ Pentadecanecarboxylic acid \$ 1-Pentadecanecarboxylic

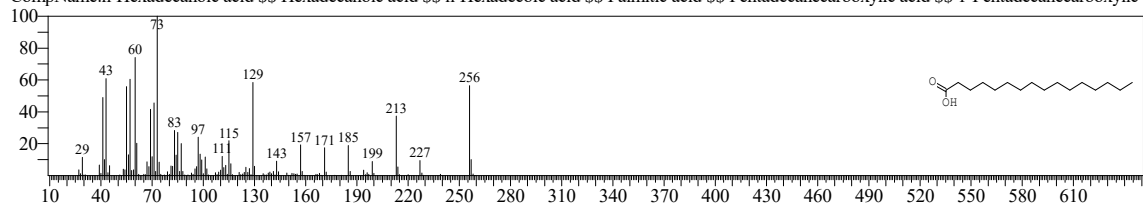

Hit#2 Entry:29890 Library:NIST20R.lib

SI:91 Formula:C15H30O2 CAS:1002-84-2 MolWeight:242 RetIndex:1869

CompName:Pentadecanoic acid \$ Pentadecylic acid \$ n-Pentadecanoic acid \$ n-Pentadecylic acid

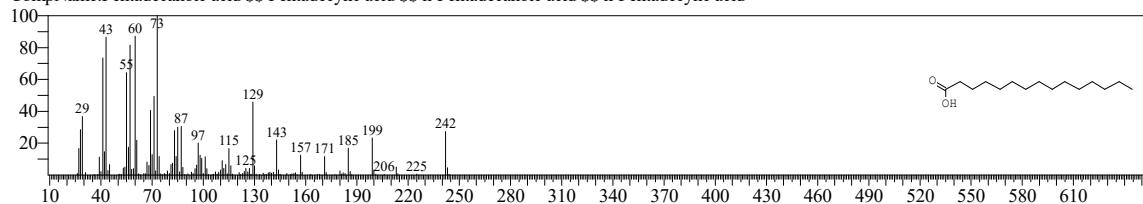

Hit#3 Entry:44286 Library:NIST20M2.lib

SI:90 Formula:C38H68O8 CAS:28474-90-0 MolWeight:652 RetIndex:4765

CompName:l-(+)-Ascorbic acid 2,6-dihexadecanoate

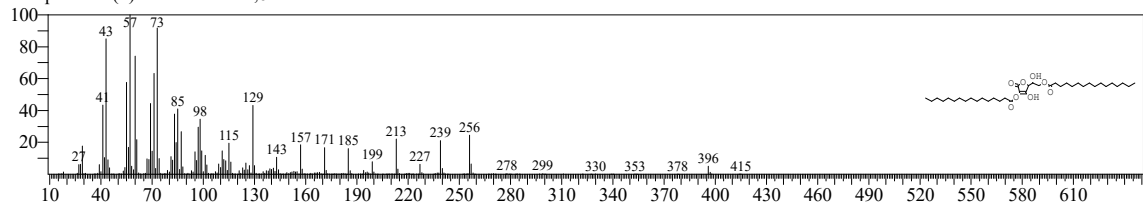

Hit#4 Entry:25643 Library:NIST20R.lib

SI:90 Formula:C13H26O2 CAS:638-53-9 MolWeight:214 RetIndex:1670

CompName:Tridecanoic acid \$ n-Tridecanoic acid \$ n-Tridecoic acid \$ Tridecyllic acid

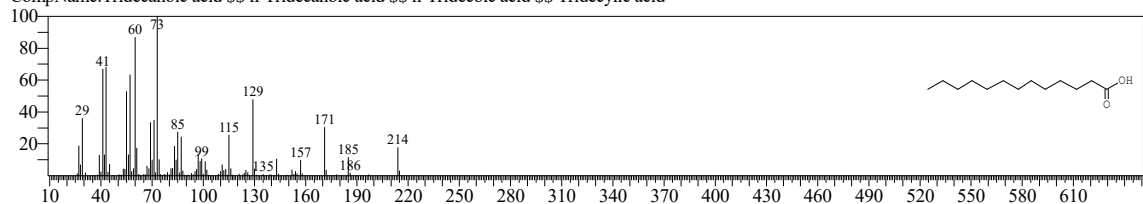

Hit#5 Entry:81713 Library:NIST20M1.lib

SI:88 Formula:C14H28O2 CAS:544-63-8 MolWeight:228 RetIndex:1769

CompName:Tetradecanoic acid \$ Myristic acid \$ n-Tetradecanoic acid \$ n-Tetradecic acid \$ Neo-Fat 14 \$ Univol U 316S \$ 1-Tridecanecarboxylic ;

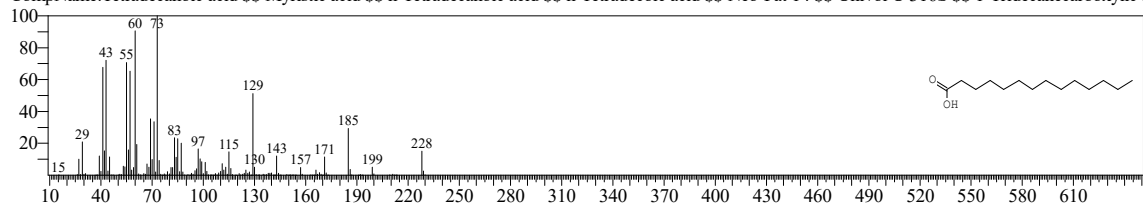

# TNAU

<< Target >>

Line#:7 R.Time:31.480(Scan#:5297) MassPeaks:302

RawMode:Averaged 31.475-31.485(5296-5298) BasePeak:67.10(4477)

BG Mode:Calc. from Peak Group 1 - Event 1 Q3 Scan

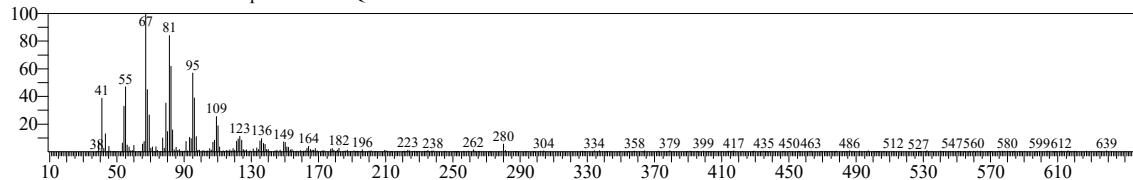

Hit#:1 Entry:139646 Library:NIST20M1.lib

SI:95 Formula:C18H32O2 CAS:2420-56-6 MolWeight:280 RetIndex:2183

CompName:10E,12Z-Octadecadienoic acid

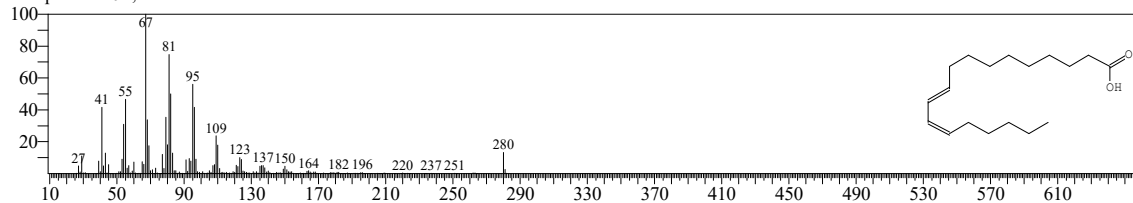

Hit#:2 Entry:139651 Library:NIST20M1.lib

SI:95 Formula:C18H32O2 CAS:544-71-8 MolWeight:280 RetIndex:2183

CompName:(9E,11E)-Octadecadienoic acid

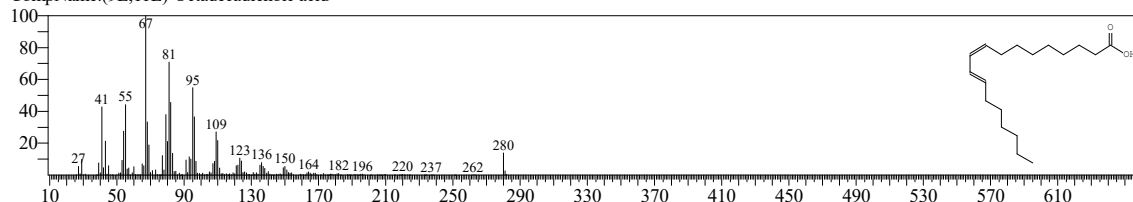

Hit#:3 Entry:34035 Library:NIST20R.lib

SI:94 Formula:C18H32O2 CAS:60-33-3 MolWeight:280 RetIndex:2183

CompName:9,12-Octadecadienoic acid (Z,Z)- \$\$ cis-9,cis-12-Octadecadienoic acid \$\$ cis,cis-Linoleic acid \$\$ Grape seed oil \$\$ Linoleic acid \$

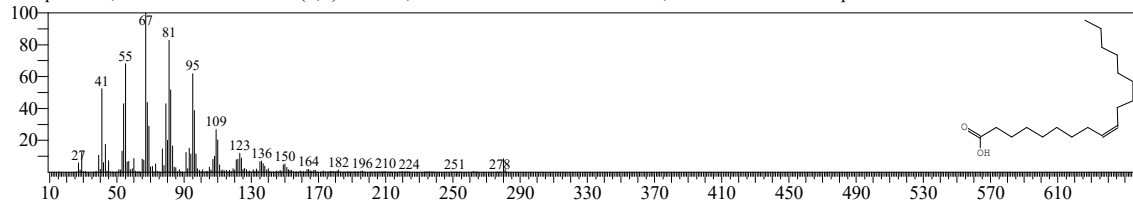

Hit#:4 Entry:139661 Library:NIST20M1.lib

SI:93 Formula:C18H32O2 CAS:506-21-8 MolWeight:280 RetIndex:2183

CompName:Linoelaidic acid

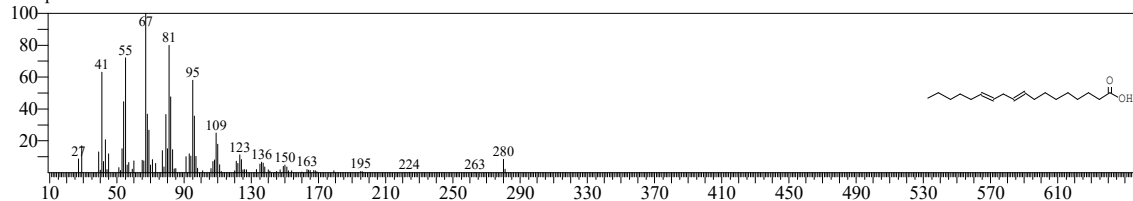

Hit#:5 Entry:173215 Library:NIST20M1.lib

SI:93 Formula:C20H36O2 CAS:2091-39-6 MolWeight:308 RetIndex:2382

CompName:11,14-Eicosadienoic acid

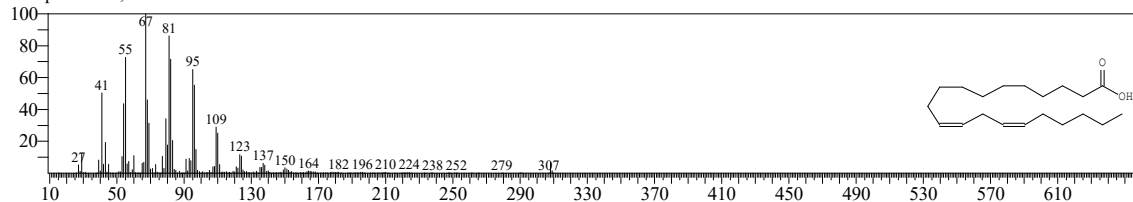



# TNAU

<< Target >>

Line# 8 R.Time:31.590(Scan#:5319) MassPeaks:368

RawMode:Averaged 31.585-31.595(5318-5320) BasePeak:79.05(1187)

BG Mode:Calc. from Peak Group 1 - Event 1 Q3 Scan

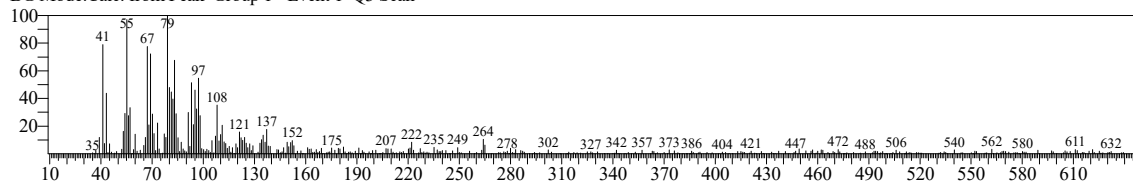

Hit#:1 Entry:63176 Library:NIST20M1.lib

SI:86 Formula:C14H26O CAS:65128-96-3 MolWeight:210 RetIndex:1609

CompName:7-Tetradecenal, (Z)- \$\$ Z-7-Tetradecenal \$\$ (7Z)-7-Tetradecenal #

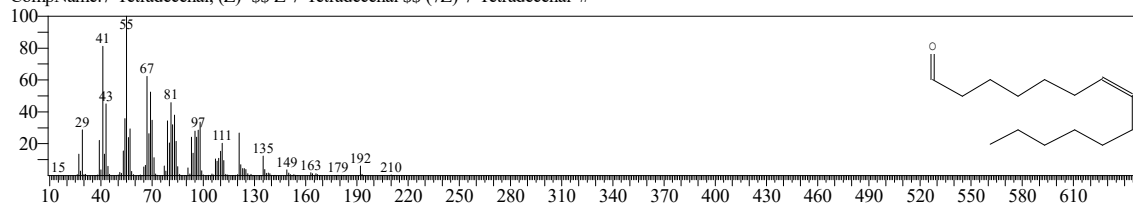

Hit#:2 Entry:218821 Library:NIST20M1.lib

SI:85 Formula:C23H40O2 CAS:56847-02-0 MolWeight:348 RetIndex:2499

CompName:8,11,14-Docosatrienoic acid, methyl ester \$\$ Methyl (8E,11E,14E)-8,11,14-docosatrienoate #

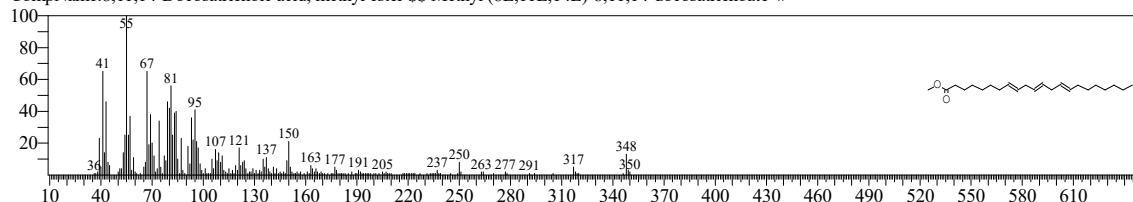

Hit#:3 Entry:92244 Library:NIST20M1.lib

SI:85 Formula:C16H30O CAS:56219-04-6 MolWeight:238 RetIndex:1808

CompName:cis-9-Hexadecenal \$\$ 9-Hexadecenal, (Z)- \$\$ (Z)-9-Hexadecenal \$\$ Z-9-Hexadecenal \$\$ (9Z)-9-Hexadecenal #

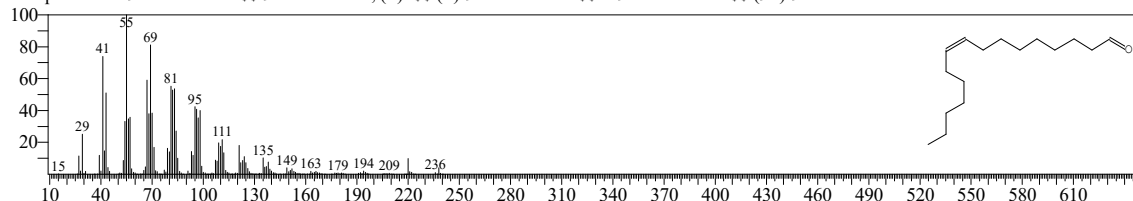

Hit#:4 Entry:205575 Library:NIST20M1.lib

SI:84 Formula:C22H40O2 CAS:69502-96-1 MolWeight:336 RetIndex:2453

CompName:2H-Pyran, 2-(2-heptadecyloxy)tetrahydro- \$\$ 2-(2-Heptadecyloxy)tetrahydro-2H-pyran #

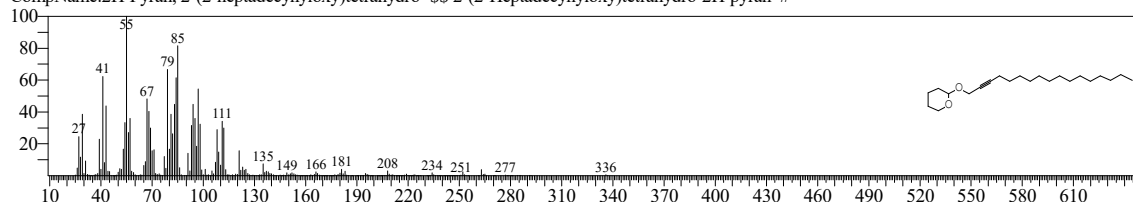

Hit#:5 Entry:170238 Library:NIST20M1.lib

SI:84 Formula:C15H24Cl2O2 CAS:0-00-0 MolWeight:306 RetIndex:2042

CompName:Dichloroacetic acid, tridec-2-ynyl ester

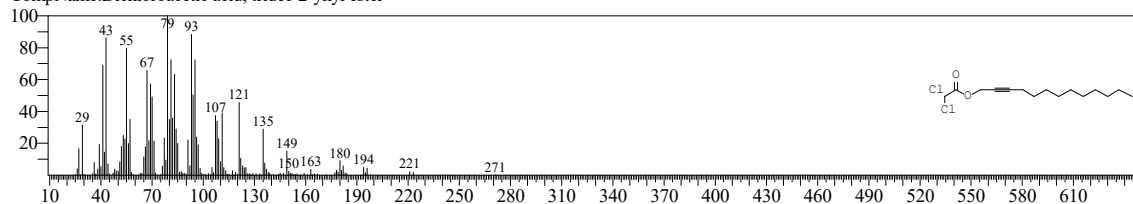

# TNAU

<< Target >>

Line#9 R.Time:32.035(Scan#:5408) MassPeaks:359

RawMode:Averaged 32.030-32.040(5407-5409) BasePeak:73.05(471)

BG Mode:Calc. from Peak Group 1 - Event 1 Q3 Scan

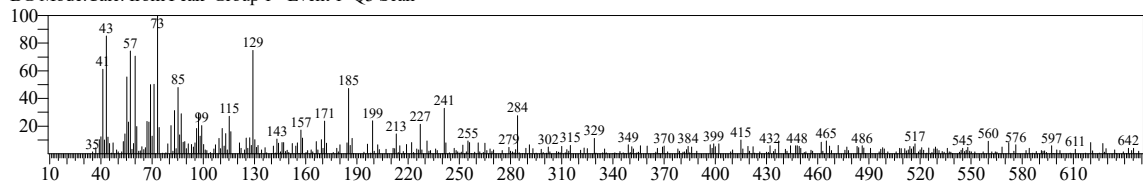

Hit#:1 Entry:34463 Library:NIST20R.lib

SI:85 Formula:C18H36O2 CAS:57-11-4 MolWeight:284 RetIndex:2167

CompName:Octadecanoic acid \$\$ Stearic acid \$\$ n-Octadecanoic acid \$\$ Humko Industriene R \$\$ Hydrofol Acid 150 \$\$ Hystrene S-97 \$\$ Hystrene T-70 \$

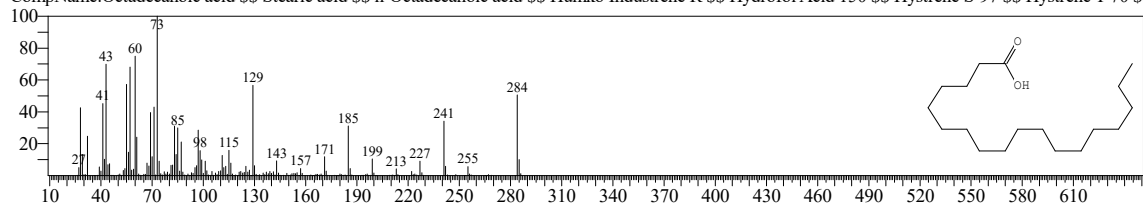

Hit#:2 Entry:44286 Library:NIST20M2.lib

SI:82 Formula:C38H68O8 CAS:28474-90-0 MolWeight:652 RetIndex:4765

CompName:L-(+)-Ascorbic acid 2,6-dihexadecanoate

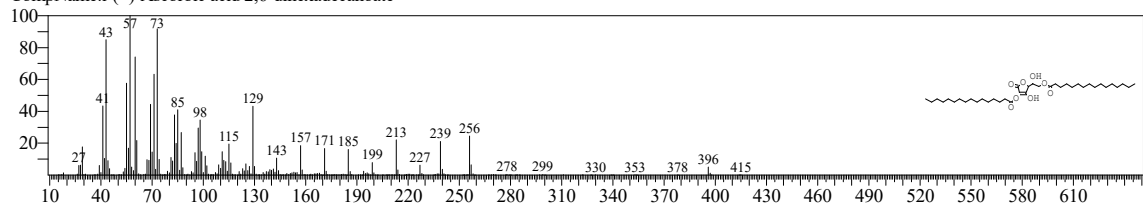

Hit#:3 Entry:29890 Library:NIST20R.lib

SI:82 Formula:C15H30O2 CAS:1002-84-2 MolWeight:242 RetIndex:1869

CompName:Pentadecanoic acid \$\$ Pentadecylic acid \$\$ n-Pentadecanoic acid \$\$ n-Pentadecylic acid

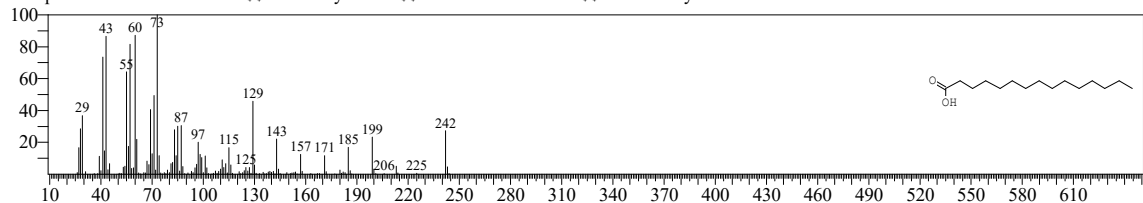

Hit#:4 Entry:31600 Library:NIST20R.lib

SI:81 Formula:C16H32O2 CAS:57-10-3 MolWeight:256 RetIndex:1968

CompName:n-Hexadecanoic acid \$\$ Hexadecanoic acid \$\$ n-Hexadecic acid \$\$ Palmitic acid \$\$ Pentadecanecarboxylic acid \$\$ 1-Pentadecanecarboxylic

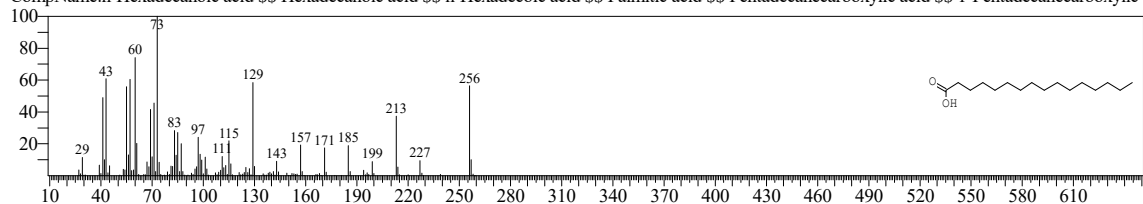

Hit#:5 Entry:37947 Library:NIST20R.lib

SI:80 Formula:C21H42O2 CAS:2363-71-5 MolWeight:326 RetIndex:2465

CompName:Heneicosanoic acid \$\$ n-Heneicosanoic acid \$\$ Henicosanoic acid #

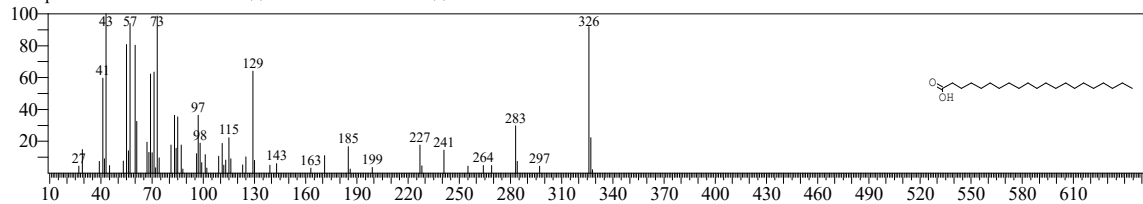

# TNAU

<< Target >>

Line#:10 R.Time:45.635(Scan#:8128) MassPeaks:416

RawMode:Averaged 45.630-45.640(8127-8129) BasePeak:139.10(3582)

BG Mode:Calc. from Peak Group 1 - Event 1 Q3 Scan

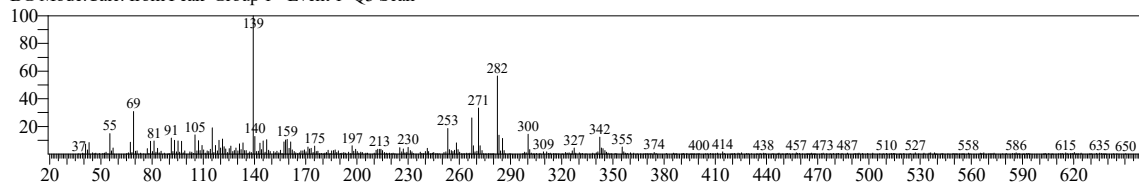

Hit#:1 Entry:8297 Library:NIST20M2.lib

SI:91 Formula:C27H42O3 CAS:512-04-9 MolWeight:414 RetIndex:2844

CompName:Diosgenin \$\$ Spirost-5-en-3-ol, (3.beta.,25R)- \$\$ Spirost-5-en-3.beta.-ol, (25R)- \$\$ Nitrogenin \$\$ 25D-spirost-5-en-3.beta.-ol \$\$ Spiro(8H-naph

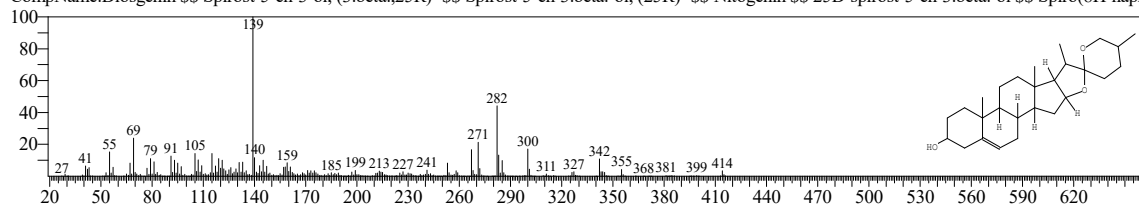

Hit#:2 Entry:41561 Library:NIST20R.lib

SI:81 Formula:C27H42O2 CAS:32277-73-9 MolWeight:398 RetIndex:2713

CompName:Des-N-solasodine \$\$ Furosta-5,20(22)-dien-3-ol #

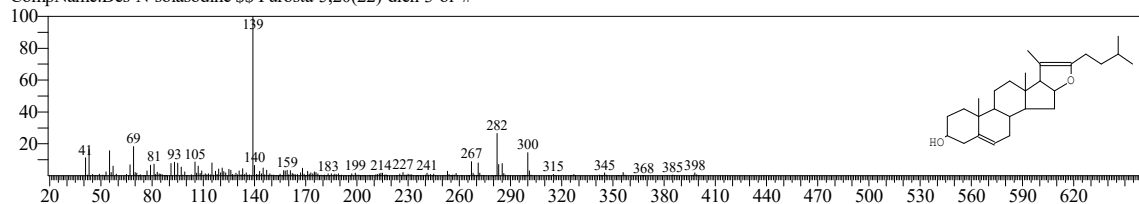

Hit#:3 Entry:14852 Library:NIST20M2.lib

SI:80 Formula:C28H44O3 CAS:116292-24-1 MolWeight:428 RetIndex:2793

CompName:Diosgenin methyl ether \$\$ Diosgenin Me derivative \$\$ (3.beta.,25R)-3-Methoxyspirost-5-ene \$\$ Spirost-5-ene, 3-methoxy-, (3.beta.,25R)-

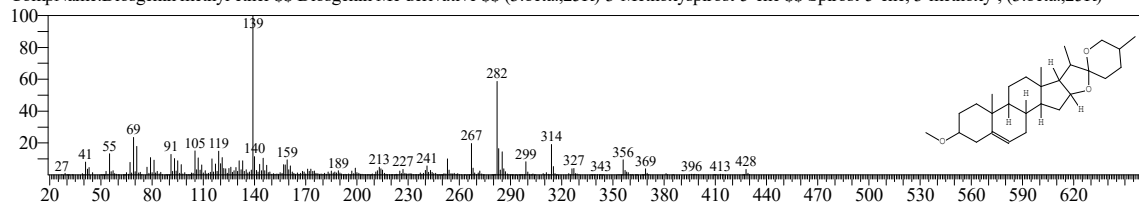

Hit#:4 Entry:24878 Library:NIST20M2.lib

SI:79 Formula:C29H44O4 CAS:1061-54-7 MolWeight:456 RetIndex:2984

CompName:Spirost-5-en-3-ol, acetate, (3.beta.,25R)- \$\$ Diosgenin acetate \$\$ Spirost-5-en-3.beta.-ol, acetate, (25R)- \$\$ Spirost-5-en-3.beta.-ol, acetate, (25R)-

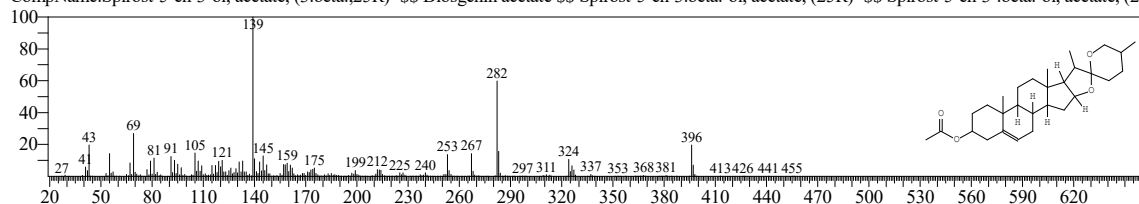

Hit#:5 Entry:42677 Library:NIST20R.lib

SI:75 Formula:C29H44O4 CAS:1180-12-7 MolWeight:456 RetIndex:2984

CompName:Neodiosgenin (3.beta.,25S) acetate \$\$ Spirost-5-en-3-ol, 3-acetate, (3.beta.,25S)- \$\$ Spirost-5-en-3-ol, acetate, (3.beta.,25S)- \$\$ Spirost-5-en-3-ol, acetate, (3.beta.,25S)-

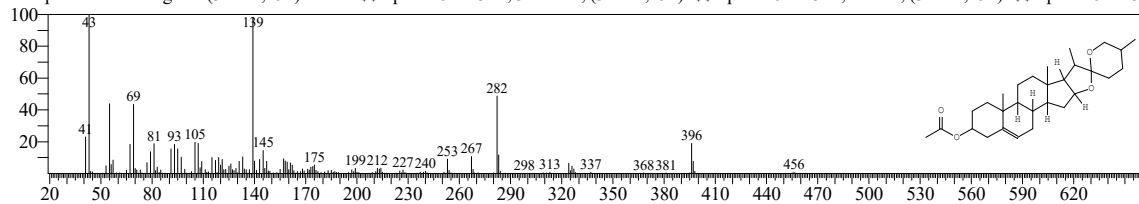

Supplement: Supplementary file 55 [file supplementary]
