# Supplementary material for: Comparative Metabolomics Profiling Reveals Key Metabolites and Associated Pathways Regulating Tuber Dormancy in White Yam (<em>Dioscorea rotundata</em>)
Source: Preprints.org preprint supplement (doi:10.20944/preprints202303.0378.v1), 2023-03-21

# TNAU

## Sample Information

Analyzed by : Admin  
 Analyzed : 05-Aug-22 7:11:26 AM  
 Sample Type : Unknown  
 Level # : 1  
 Sample Name : T42-2  
 Sample ID : T42-2  
 IS Amount : [1]=1  
 Sample Amount : 1  
 Dilution Factor : 1  
 Vial # : 22  
 Injection Volume : 1.00  
 Data File : D:\GCMS-8040NX\Aug 2022\Users\04.08.2022\Data files\04082022-023.qgd  
 Org Data File : D:\GCMS-8040NX\Aug 2022\Users\04.08.2022\Data files\04082022-023.qgd  
 Method File : D:\GCMS-8040NX\Aug 2022\Users\04.08.2022\Method file\27072022\_methodfile.qgm  
 Org Method File : D:\GCMS-8040NX\Aug 2022\Users\04.08.2022\Method file\27072022\_methodfile.qgm  
 Report File :  
 Tuning File : D:\GCMS-8040NX\Aug 2022\Tuning Data\TUNING 04082022.qgt  
 [Comment]  
 Jerry samples  
 Modified by : Admin  
 Modified : 05-Aug-22 4:42:35 PM

Chromatogram T42-2 D:\GCMS-8040NX\Aug 2022\Users\04.08.2022\Data files\04082022-023.qgd

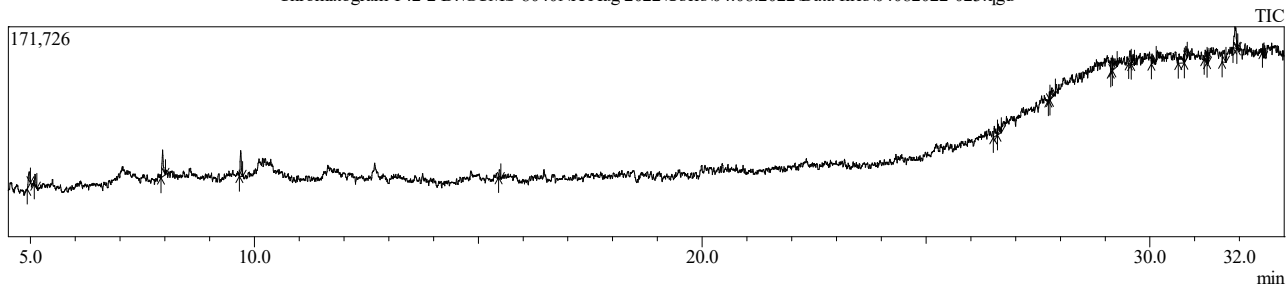

Peak Report TIC

| Peak# | R.Time | Area  | Area% | Height | Height% | A/H  | Similarity | Name                            |
|-------|--------|-------|-------|--------|---------|------|------------|---------------------------------|
| 1     | 4.970  | 26467 | 5.35  | 11133  | 4.97    | 2.38 | 70         | 3,3-Dimethoxy-2-butanone        |
| 2     | 5.100  | 14142 | 2.86  | 9037   | 4.04    | 1.56 | 47         | Hydroxylamine-3TMS              |
| 3     | 7.948  | 45890 | 9.28  | 21909  | 9.79    | 2.09 | 87         | Undecane                        |
| 4     | 9.693  | 39071 | 7.90  | 20986  | 9.38    | 1.86 | 87         | Dodecane                        |
| 5     | 15.471 | 10340 | 2.09  | 6615   | 2.96    | 1.56 | 70         | 2,4-Di-tert-butylphenol         |
| 6     | 26.520 | 20941 | 4.23  | 8595   | 3.84    | 2.44 | 36         | 2-Hydroxyisobutyric acid-2TMS   |
| 7     | 26.605 | 24040 | 4.86  | 8030   | 3.59    | 2.99 | 31         | Stearic acid-TMS                |
| 8     | 27.753 | 6533  | 1.32  | 6990   | 3.12    | 0.93 | 31         | 2-Hydroxyphenylacetic acid-2TMS |
| 9     | 27.780 | 21759 | 4.40  | 6523   | 2.91    | 3.34 | 35         | Hypoxanthine-2TMS               |
| 10    | 29.135 | 13744 | 2.78  | 11163  | 4.99    | 1.23 | 46         | 3,4-Dihydroxymandelic acid-4TMS |
| 11    | 29.170 | 31389 | 6.35  | 9831   | 4.39    | 3.19 | 25         | Hippuric acid-TMS               |
| 12    | 29.560 | 22734 | 4.60  | 10605  | 4.74    | 2.14 | 33         | 2-Phenyllactic acid-2TMS        |
| 13    | 29.625 | 20286 | 4.10  | 8672   | 3.87    | 2.34 | 33         | 3-Hydroxybenzoic acid-2TMS      |
| 14    | 30.040 | 12905 | 2.61  | 6665   | 2.98    | 1.94 | 45         | 3-Hydroxyanthranilic acid-2TMS  |
| 15    | 30.645 | 34902 | 7.06  | 7354   | 3.29    | 4.75 | 34         | 3,4-Dihydroxymandelic acid-4TMS |
| 16    | 30.785 | 25696 | 5.20  | 8448   | 3.77    | 3.04 | 39         | Protocatechuic acid-3TMS        |
| 17    | 31.235 | 18653 | 3.77  | 8423   | 3.76    | 2.21 | 40         | Chloramphenicol-2TMS            |
| 18    | 31.290 | 7725  | 1.56  | 10443  | 4.67    | 0.74 | 35         | Glucose-5TMS(1)                 |
| 19    | 31.664 | 29465 | 5.96  | 9780   | 4.37    | 3.01 | 39         | 4-Hydroxybenzoic acid-2TMS      |
| 20    | 31.900 | 53501 | 10.82 | 17270  | 7.72    | 3.10 | 30         | 4-Aminobenzoic acid-2TMS        |
| 21    | 31.950 | 4757  | 0.96  | 6185   | 2.76    | 0.77 | 22         | 3,4-Dihydroxymandelic acid-4TMS |
| 22    | 32.526 | 9567  | 1.93  | 9172   | 4.10    | 1.04 | 34         | Batyl alcohol-2TMS              |

# TNAU

| Peak# | R.Time | Area   | Area%  | Height | Height% | A/H | Similarity | Name |
|-------|--------|--------|--------|--------|---------|-----|------------|------|
|       |        | 494507 | 100.00 | 223829 | 100.00  |     |            |      |

## Library

<< Target >>

Line#:1 R.Time:4.970(Scan#:95) MassPeaks:276

RawMode:Averaged 4.965-4.975(94-96) BasePeak:89.05(2854)

BG Mode:Calc. from Peak Group 1 - Event 1 Q3 Scan

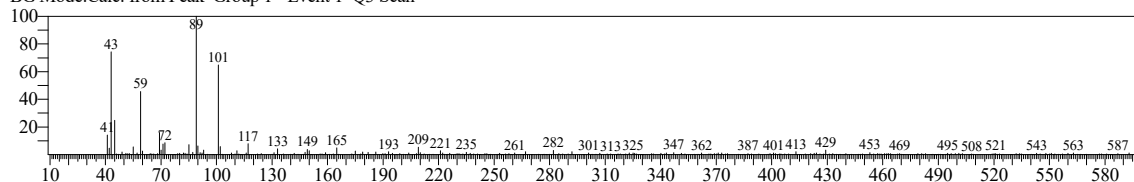

Hit#:1 Entry:9263 Library:NIST20M1.lib

SI:70 Formula:C6H12O3 CAS:21983-72-2 MolWeight:132 RetIndex:821

CompName:3,3-Dimethoxy-2-butanone

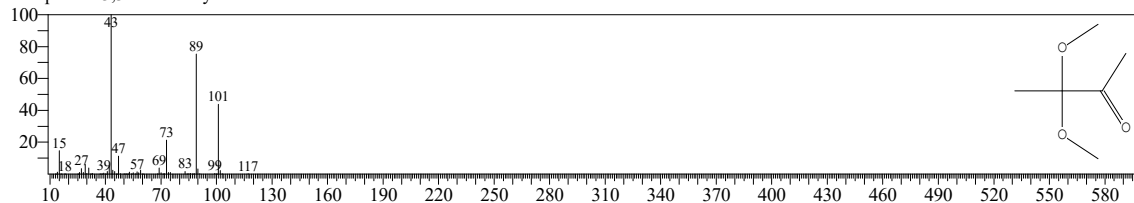

Hit#:2 Entry:1 Library:FA ME SP2560 EI V3.lib

SI:56 Formula:C5H10O2 CAS:107-92-6 MolWeight:102 RetIndex:1113

CompName:Methyl butanoate ; Butanoic acid

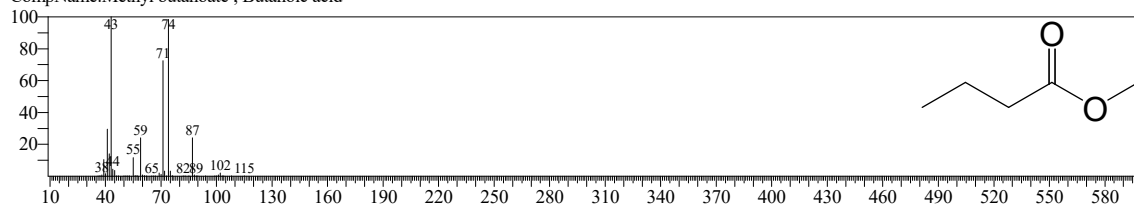

Hit#:3 Entry:34 Library:OA TMS DB5 67min V3.lib

SI:39 Formula:C10H16OSi CAS:106-44-5 MolWeight:180 RetIndex:1160

CompName:4-Cresol-TMS ; 4-methylphenol

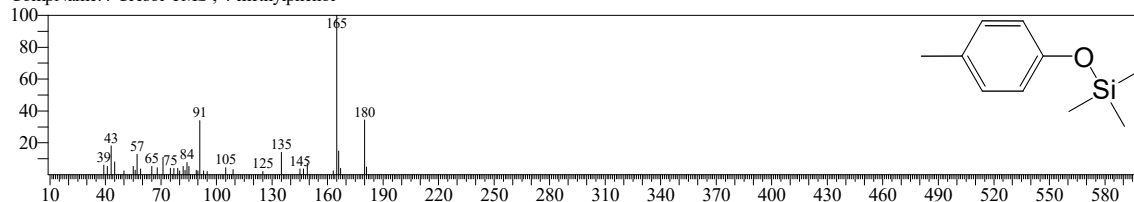

Hit#:4 Entry:456 Library:OA TMS DB5 67min V3.lib

SI:37 Formula:C18H33NO3Si CAS:37350-58-6 MolWeight:339 RetIndex:2094

CompName:Metoprolol-TMS ; 1-[4-(2-methoxyethyl)phenoxy]-3-(propan-2-ylamino)propan-2-ol

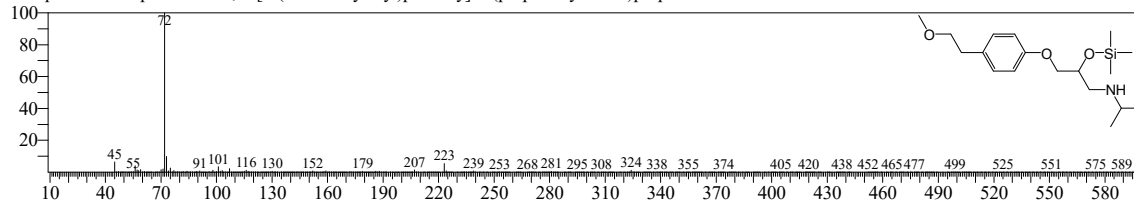

# TNAU

<< Target >>

Line#:1 R.Time:4.970(Scan#:95) MassPeaks:276

RawMode:Averaged 4.965-4.975(94-96) BasePeak:89.05(2854)

BG Mode:Calc. from Peak Group 1 - Event 1 Q3 Scan

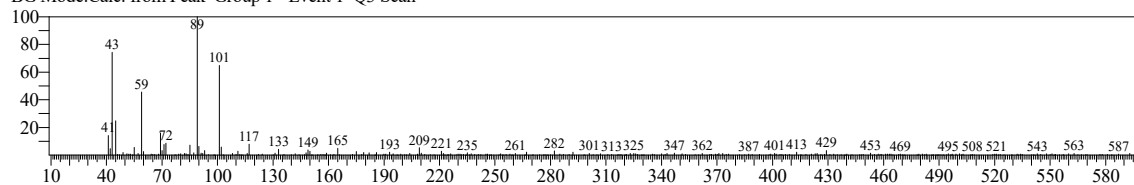

Hit#:5 Entry:29 Library:OA\_TMS\_DB5\_67min\_V3.lib

SI:33 Formula:C9H23NO2Si2 CAS:107-97-1 MolWeight:233 RetIndex:1141

CompName:Sarcosine-2TMS ; 2-(methylamino)acetic acid

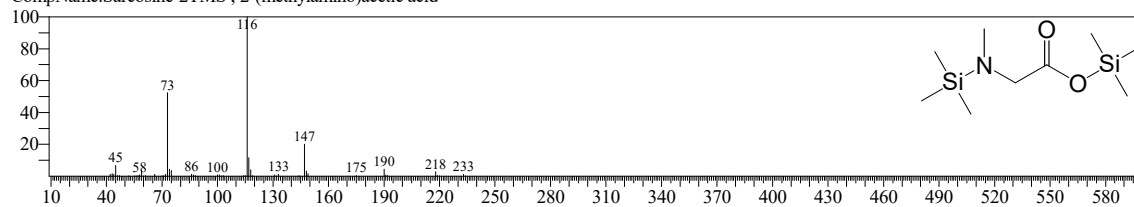

<< Target >>

Line#:2 R.Time:5.100(Scan#:121) MassPeaks:271

RawMode:Averaged 5.095-5.105(120-122) BasePeak:103.10(2407)

BG Mode:Calc. from Peak Group 1 - Event 1 Q3 Scan

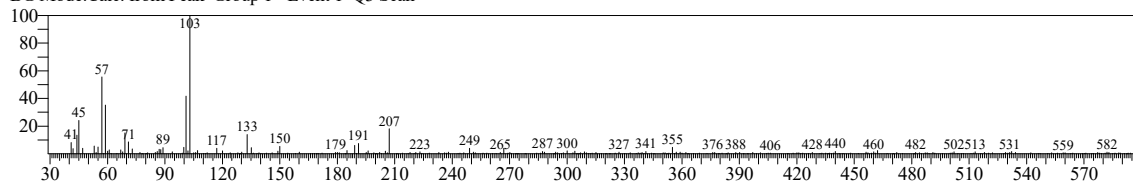

Hit#:1 Entry:20 Library:OA\_TMS\_DB5\_67min\_V3.lib

SI:47 Formula:C9H27NOSi3 CAS:7803-49-8 MolWeight:249 RetIndex:1127

CompName:Hydroxylamine-3TMS ; hydroxylamine

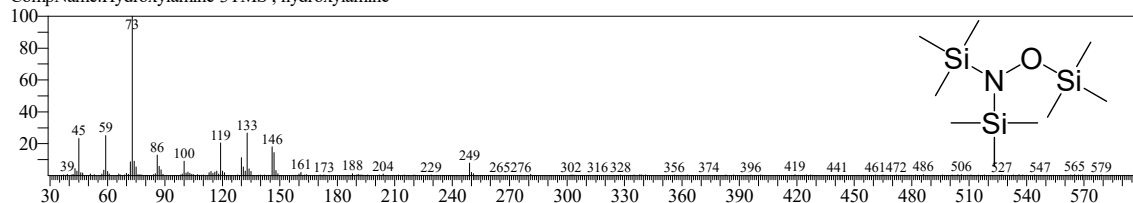

Hit#:2 Entry:57 Library:OA\_TMS\_DB5\_67min\_V3.lib

SI:46 Formula:C9H22O3Si2 CAS:96-26-4 MolWeight:234 RetIndex:1224

CompName:Dihydroxyacetone-2TMS ; 1,3-dihydroxypropan-2-one

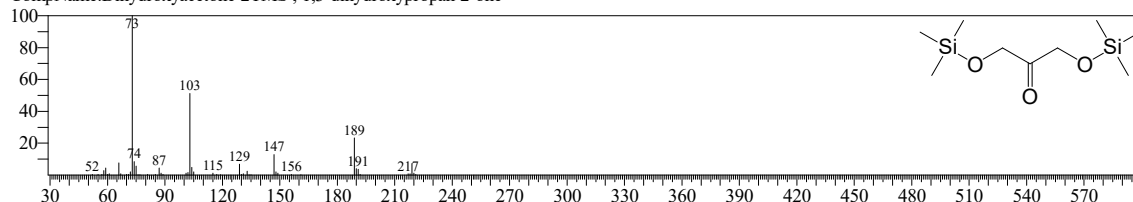

Hit#:3 Entry:62 Library:OA\_TMS\_DB5\_67min\_V3.lib

SI:45 Formula:C12H28O3Si2 CAS:20312-37-2 MolWeight:276 RetIndex:1244

CompName:2-Hydroxyisocaproic acid-2TMS ; (2R)-2-hydroxy-4-methylpentanoic acid

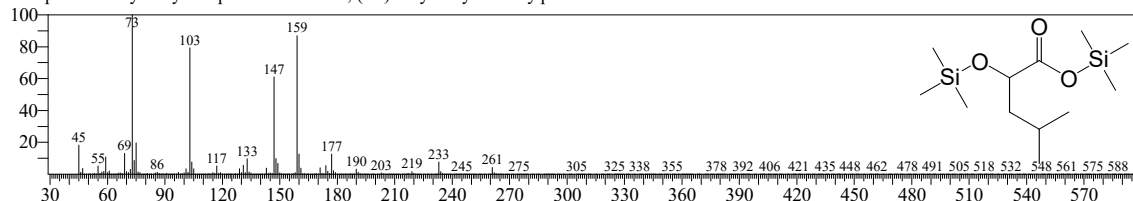

Hit#:4 Entry:514 Library:OA\_TMS\_DB5\_67min\_V3.lib

SI:44 Formula:C16H30N2O5Si2 CAS:50-89-5 MolWeight:386 RetIndex:2428

CompName:Thymidine-2TMS ; 1-[(2R,4S,5R)-4-hydroxy-5-(hydroxymethyl)oxolan-2-yl]-5-methylpyrimidine-2,4-dione

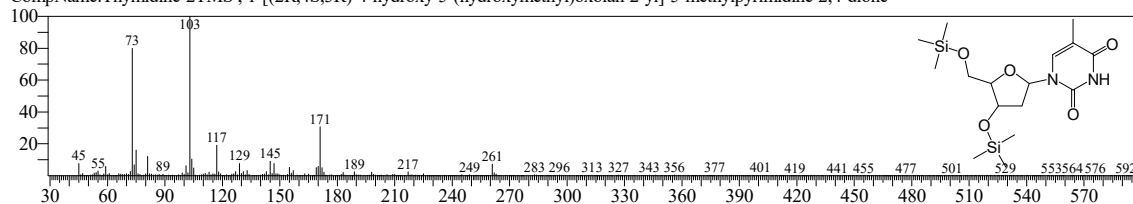

Hit#:5 Entry:39 Library:OA\_TMS\_DB5\_67min\_V3.lib

SI:43 Formula:C10H21NO3Si CAS:816-66-0 MolWeight:231 RetIndex:1181

CompName:2-Ketoisocaproic acid-meto-TMS(1) ; 4-methyl-2-oxopentanoic acid

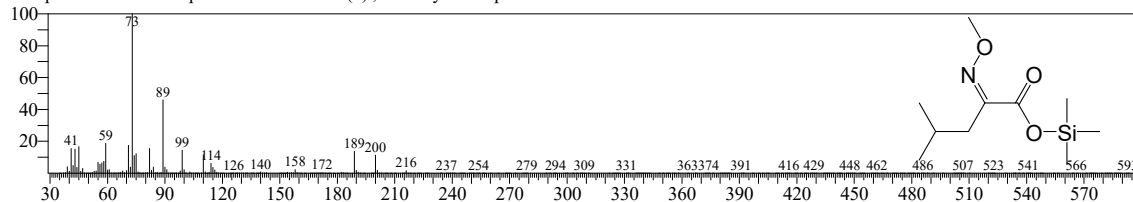

# TNAU

<< Target >>

Line#3 R.Time:7.950(Scan#:691) MassPeaks:311

RawMode:Averaged 7.945-7.955(690-692) BasePeak:57.05(5246)

BG Mode:Calc. from Peak Group 1 - Event 1 Q3 Scan

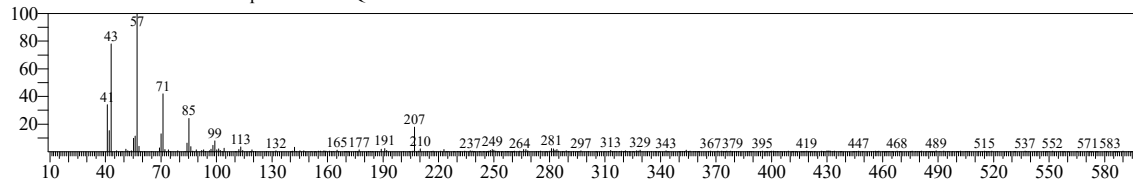

Hit#:1 Entry:21042 Library:NIST20M1.lib

SI:87 Formula:C11H24 CAS:1120-21-4 MolWeight:156 RetIndex:1100

CompName:Undecane \$\$ n-Undecane \$\$ Hendecane \$\$ n-C11H24 \$\$ UN 2330

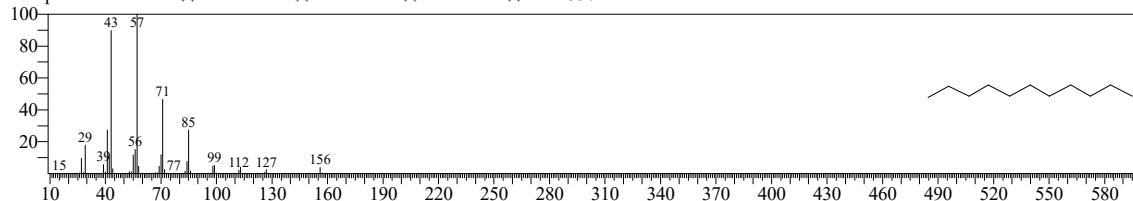

Hit#:2 Entry:40226 Library:NIST20M1.lib

SI:87 Formula:C13H28 CAS:629-50-5 MolWeight:184 RetIndex:1300

CompName:Tridecane \$\$ n-Tridecane \$\$ Tridecane, n-

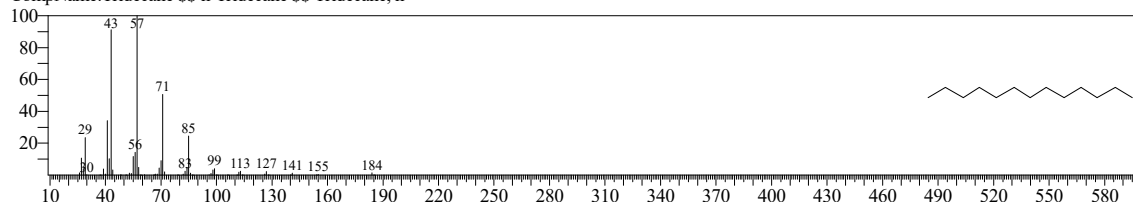

Hit#:3 Entry:40271 Library:NIST20M1.lib

SI:87 Formula:C13H28 CAS:17312-82-2 MolWeight:184 RetIndex:1185

CompName:Undecane, 4,6-dimethyl- \$\$ 4,6-Dimethylundecane #

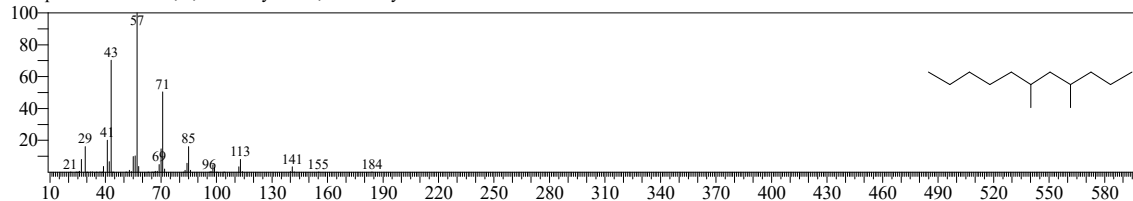

Hit#:4 Entry:9444 Library:NIST20R.lib

SI:87 Formula:C10H22 CAS:124-18-5 MolWeight:142 RetIndex:1000

CompName:Decane \$\$ n-Decane \$\$ n-C10H22 \$\$ UN 2247

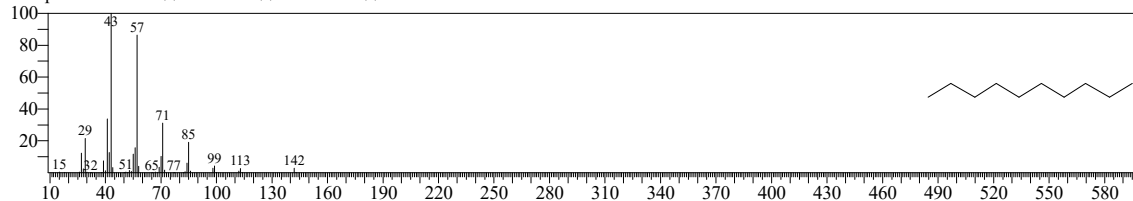

Hit#:5 Entry:16192 Library:NIST20R.lib

SI:87 Formula:C12H26 CAS:112-40-3 MolWeight:170 RetIndex:1200

CompName:Dodecane \$\$ n-Dodecane \$\$ Adakane 12 \$\$ Ba 51-090453 \$\$ CH3(CH2)10CH3 \$\$ Bihexyl \$\$ Dihexyl \$\$ Duodecane \$\$ NSC 8714

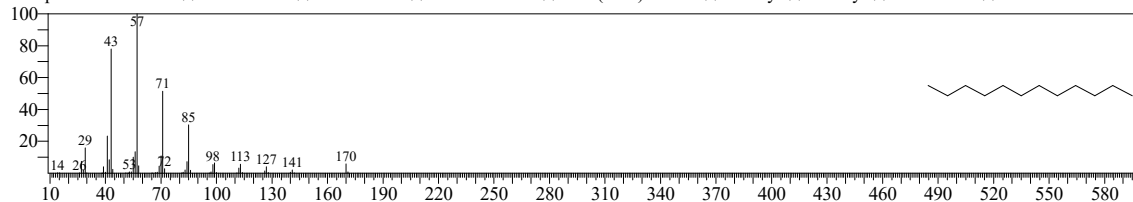

# TNAU

<< Target >>

Line#:4 R.Time:9.695(Scan#:1040) MassPeaks:291

RawMode:Averaged 9.690-9.700(1039-1041) BasePeak:57.10(4722)

BG Mode:Calc. from Peak Group 1 - Event 1 Q3 Scan

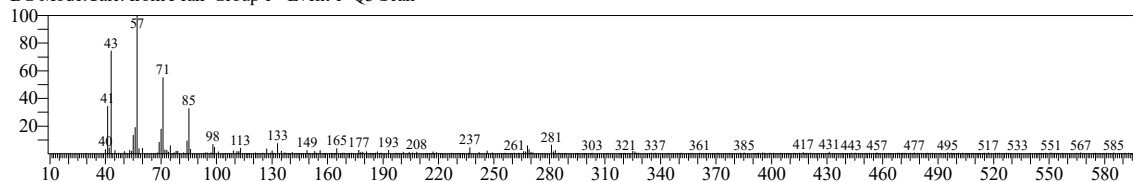

Hit#:1 Entry:30057 Library:NIST20M1.lib

SI:87 Formula:C<sub>12</sub>H<sub>26</sub> CAS:112-40-3 MolWeight:170 RetIndex:1200

CompName:Dodecane \$\$ n-Dodecane \$\$ Adakane 12 \$\$ Ba 51-090453 \$\$ CH<sub>3</sub>(CH<sub>2</sub>)<sub>10</sub>CH<sub>3</sub> \$\$ Bihexyl \$\$ Dihexyl \$\$ Duodecane \$\$ NSC 8714

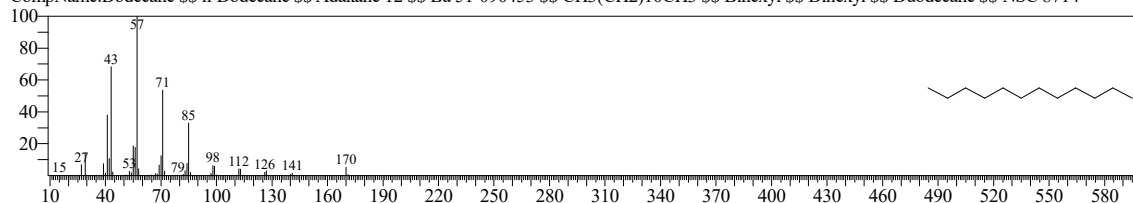

Hit#:2 Entry:12898 Library:NIST20R.lib

SI:86 Formula:C<sub>11</sub>H<sub>24</sub> CAS:1120-21-4 MolWeight:156 RetIndex:1100

CompName:Undecane \$\$ n-Undecane \$\$ Hendecane \$\$ n-C<sub>11</sub>H<sub>24</sub> \$\$ UN 2330

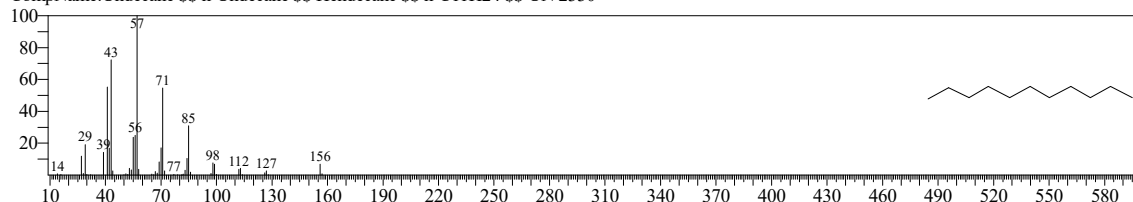

Hit#:3 Entry:19412 Library:NIST20R.lib

SI:86 Formula:C<sub>13</sub>H<sub>28</sub> CAS:629-50-5 MolWeight:184 RetIndex:1300

CompName:Tridecane \$\$ n-Tridecane \$\$ Tridecane, n-

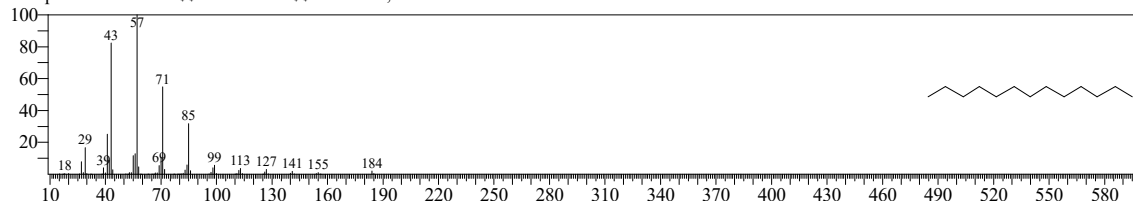

Hit#:4 Entry:22497 Library:NIST20R.lib

SI:86 Formula:C<sub>14</sub>H<sub>30</sub> CAS:629-59-4 MolWeight:198 RetIndex:1400

CompName:Tetradecane \$\$ n-Tetradecane

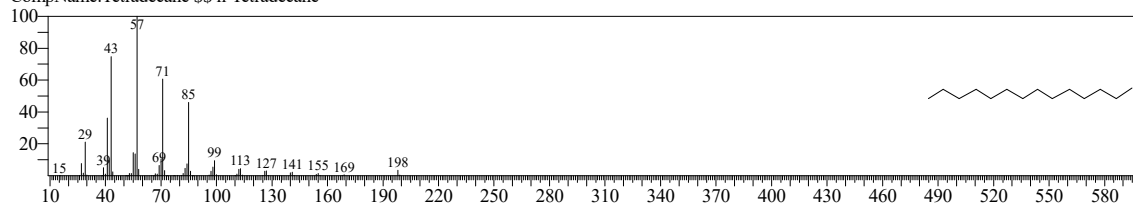

Hit#:5 Entry:30051 Library:NIST20M1.lib

SI:85 Formula:C<sub>12</sub>H<sub>26</sub> CAS:17312-53-7 MolWeight:170 RetIndex:1086

CompName:Decane, 3,6-dimethyl- \$\$ 3,6-Dimethyldecane

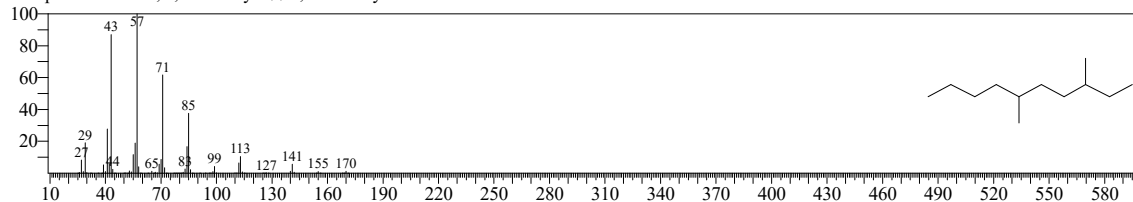

# TNAU

<< Target >>

Line#:5 R.Time:15.470(Scan#:2195) MassPeaks:295

RawMode:Averaged 15.465-15.475(2194-2196) BasePeak:191.10(1882)

BG Mode:Calc. from Peak Group 1 - Event 1 Q3 Scan

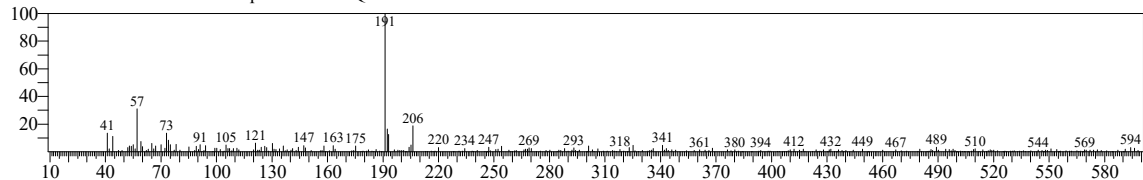

Hit#:1 Entry:24086 Library:NIST20R.lib

SI:70 Formula:C<sub>14</sub>H<sub>22</sub>O CAS:96-76-4 MolWeight:206 RetIndex:1555

CompName:2,4-Di-tert-butylphenol \$\$ Phenol, 2,4-bis(1,1-dimethylethyl)- \$\$ Phenol, 2,4-di-tert-butyl- \$\$ 2,4-di-t-Butylphenol \$\$ 1-Hydroxy-2,4-di-tert-bu

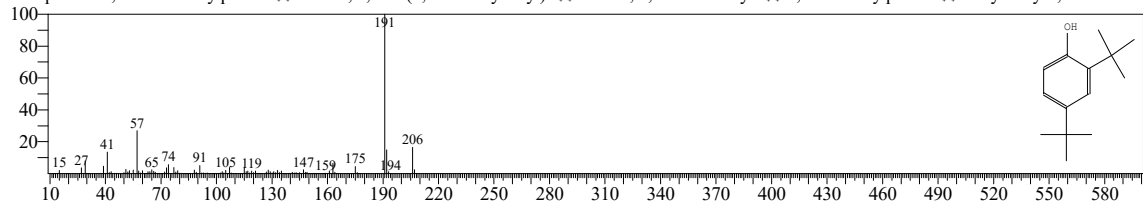

Hit#:2 Entry:271 Library:OA\_TMS\_DB5\_67min\_V3.lib

SI:49 Formula:C<sub>18</sub>H<sub>44</sub>O<sub>5</sub>Si<sub>4</sub> CAS:3615-37-0 MolWeight:452 RetIndex:1738

CompName:Fucose-4TMS(2) ; (2S,3R,4S,5R,6R)-6-methyloxane-2,3,4,5-tetrol

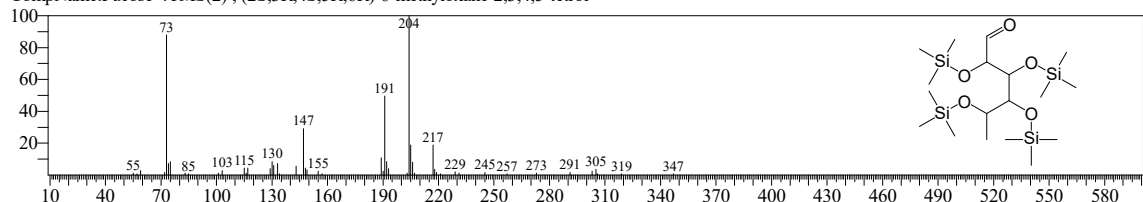

Hit#:3 Entry:349 Library:OA\_TMS\_DB5\_67min\_V3.lib

SI:48 Formula:C<sub>21</sub>H<sub>52</sub>O<sub>6</sub>Si<sub>5</sub> CAS:2595-97-3 MolWeight:540 RetIndex:1874

CompName:Allose-5TMS ; (2R,3R,4R,5R)-2,3,4,5,6-pentahydroxyhexanal

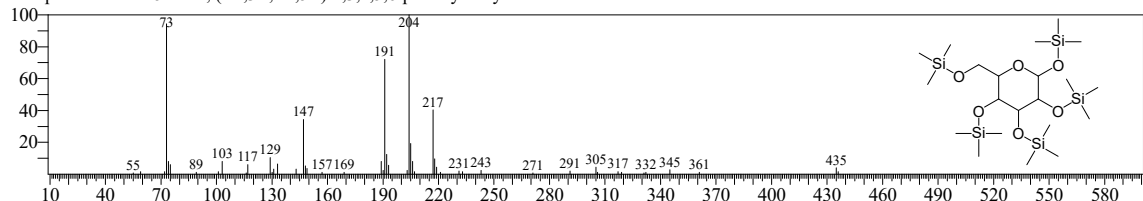

Hit#:4 Entry:437 Library:OA\_TMS\_DB5\_67min\_V3.lib

SI:48 Formula:C<sub>21</sub>H<sub>52</sub>O<sub>6</sub>Si<sub>5</sub> CAS:50-99-7 MolWeight:540 RetIndex:2002

CompName:Glucose-5TMS(2) ; (3R,4S,5S,6R)-6-(hydroxymethyl)oxane-2,3,4,5-tetrol

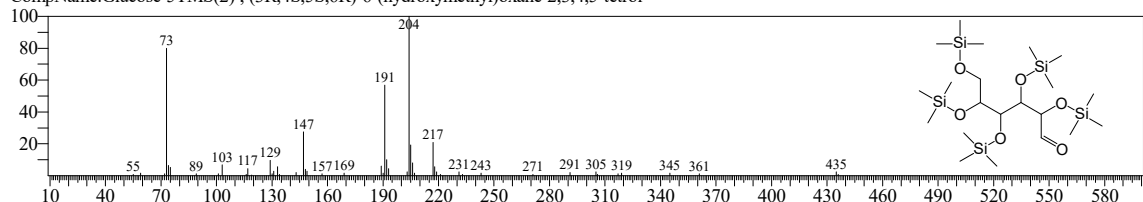

Hit#:5 Entry:345 Library:OA\_TMS\_DB5\_67min\_V3.lib

SI:48 Formula:C<sub>21</sub>H<sub>52</sub>O<sub>6</sub>Si<sub>5</sub> CAS:59-23-4 MolWeight:540 RetIndex:1868

CompName:Galactose-5TMS(2) ; (3R,4S,5R,6R)-6-(hydroxymethyl)oxane-2,3,4,5-tetrol

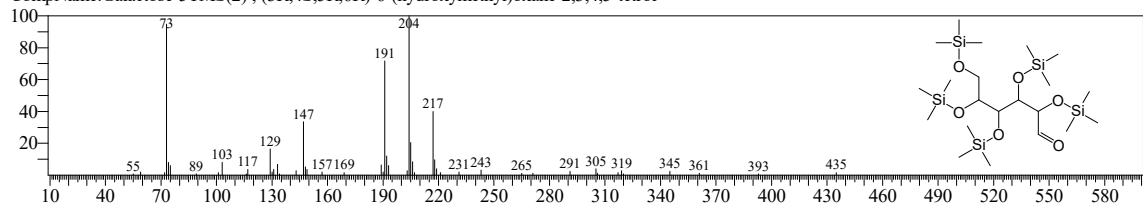

# TNAU

<< Target >>

Line#:6 R.Time:26.520(Scan#:4405) MassPeaks:320

RawMode:Averaged 26.515-26.525(4404-4406) BasePeak:207.05(1182)

BG Mode:Calc. from Peak Group 1 - Event 1 Q3 Scan

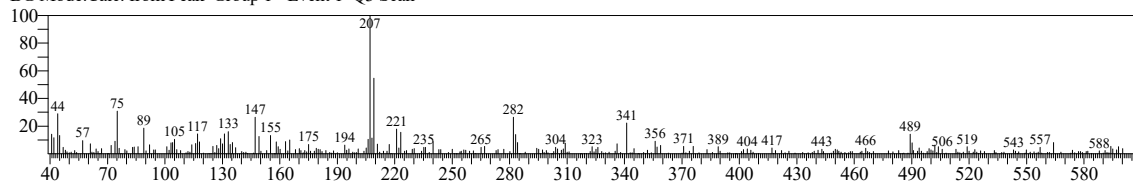

Hit#:1 Entry:10 Library:OA\_TMS\_DB5\_67min\_V3.lib

SI:36 Formula:C10H24O3Si2 CAS:594-61-6 MolWeight:248 RetIndex:1067

CompName:2-Hydroxyisobutyric acid-2TMS ; 2-hydroxy-2-methylpropanoic acid

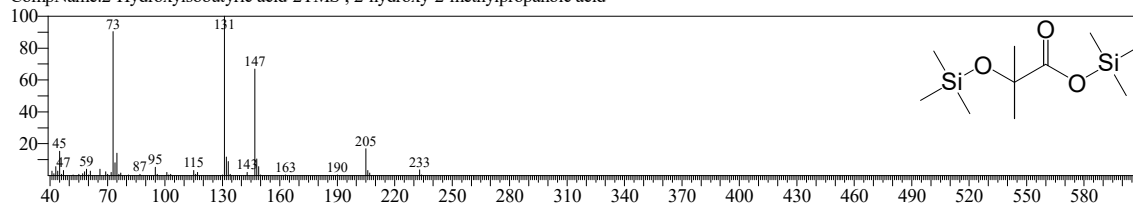

Hit#:2 Entry:491 Library:OA\_TMS\_DB5\_67min\_V3.lib

SI:35 Formula:C21H44O2Si CAS:57-11-4 MolWeight:356 RetIndex:2244

CompName:Stearic acid-TMS ; octadecanoic acid

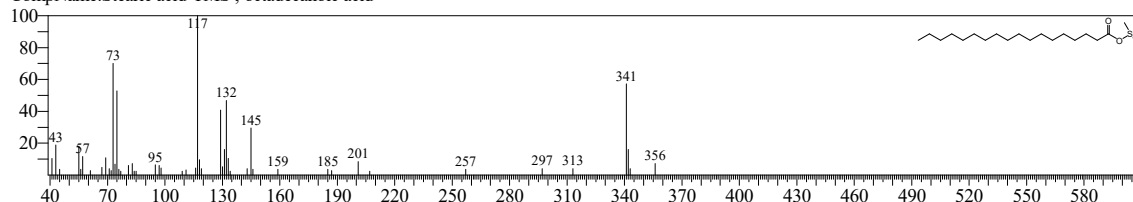

Hit#:3 Entry:307 Library:OA\_TMS\_DB5\_67min\_V3.lib

SI:35 Formula:C15H25NO3Si2 CAS:66407-11-2 MolWeight:323 RetIndex:1819

CompName:Hippuric acid-2TMS ; 2-benzamidoacetic acid

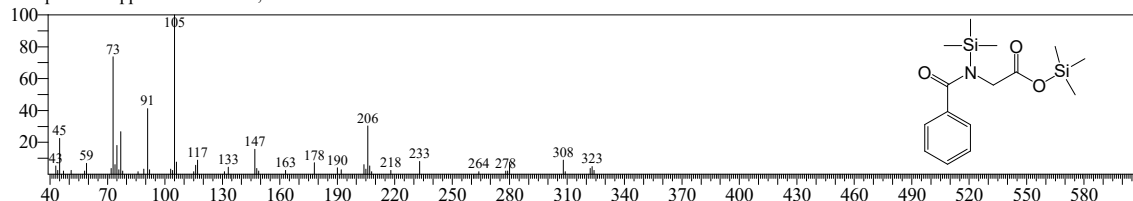

Hit#:4 Entry:13 Library:OA\_TMS\_DB5\_67min\_V3.lib

SI:33 Formula:C8H20O3Si2 CAS:79-14-1 MolWeight:220 RetIndex:1074

CompName:Glycolic acid-2TMS ; 2-hydroxyacetic acid

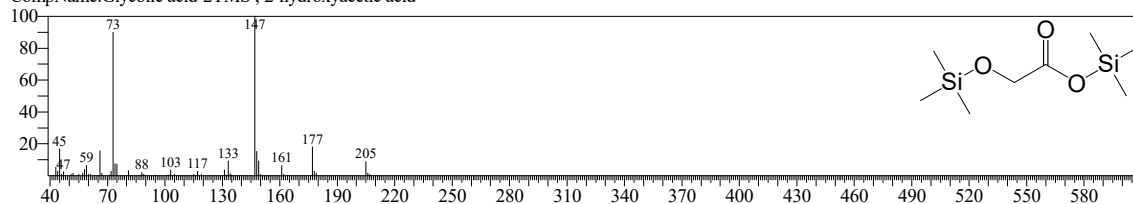

Hit#:5 Entry:35 Library:OA\_TMS\_DB5\_67min\_V3.lib

SI:32 Formula:C10H24O3Si2 CAS:300-85-6 MolWeight:248 RetIndex:1161

CompName:3-Hydroxybutyric acid-2TMS ; 3-hydroxybutanoic acid

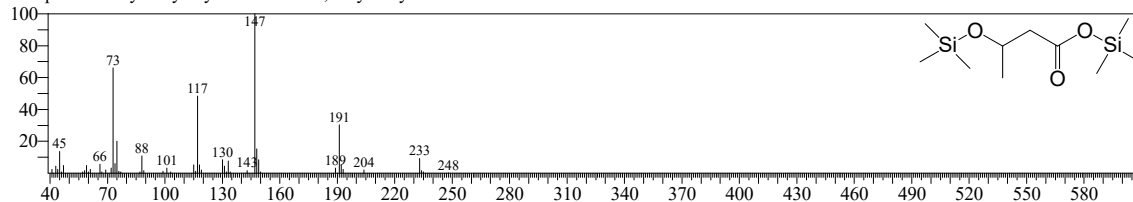



# TNAU

<< Target >>

Line#:7 R.Time:26.605(Scan#:4422) MassPeaks:350

RawMode:Averaged 26.600-26.610(4421-4423) BasePeak:75.00(565)

BG Mode:Calc. from Peak Group 1 - Event 1 Q3 Scan

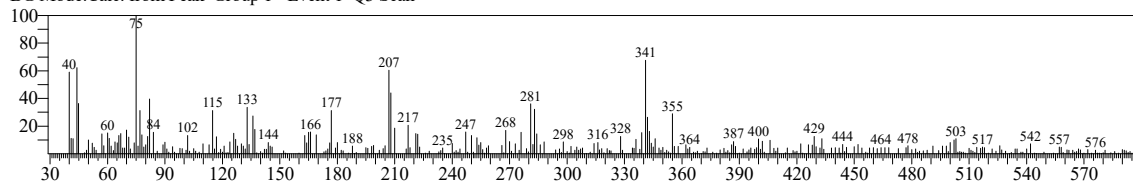

Hit#:1 Entry:491 Library:OA\_TMS\_DB5\_67min\_V3.lib

SI:31 Formula:C21H44O2Si CAS:57-11-4 MolWeight:356 RetIndex:2244

CompName:Stearic acid-TMS ; octadecanoic acid

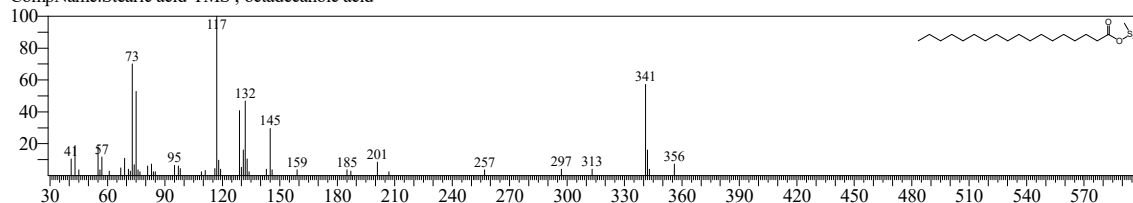

Hit#:2 Entry:361 Library:OA\_TMS\_DB5\_67min\_V3.lib

SI:29 Formula:C9H14N2O2Si CAS:104-98-3 MolWeight:210 RetIndex:1896

CompName:Urocanic acid-TMS ; (E)-3-(1H-imidazol-5-yl)prop-2-enoic acid

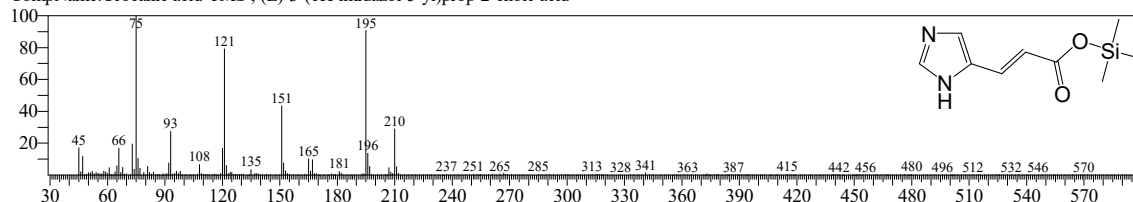

Hit#:3 Entry:137 Library:OA\_TMS\_DB5\_67min\_V3.lib

SI:28 Formula:C9H14N2O2Si CAS:98-92-0 MolWeight:194 RetIndex:1486

CompName:Niacinamide-TMS ; pyridine-3-carboxamide

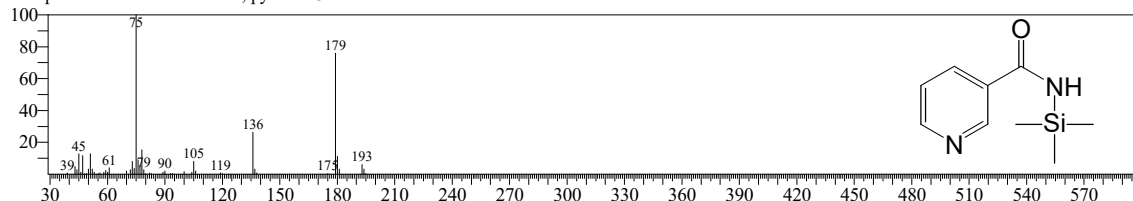

Hit#:4 Entry:11 Library:OA\_TMS\_DB5\_67min\_V3.lib

SI:27 Formula:C9H20O2Si CAS:142-62-1 MolWeight:188 RetIndex:1071

CompName:Caproic acid-TMS ; hexanoic acid

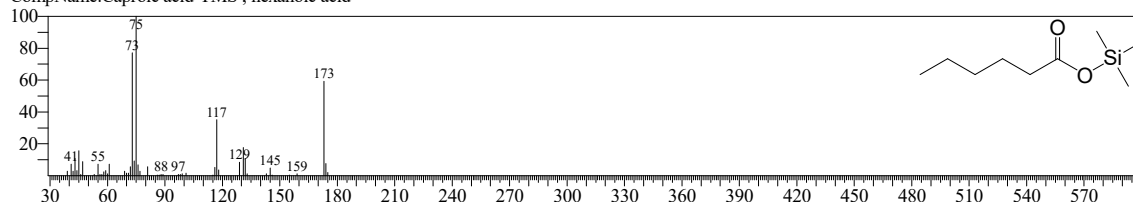

Hit#:5 Entry:70 Library:OA\_TMS\_DB5\_67min\_V3.lib

SI:26 Formula:C11H24O2Si CAS:124-07-2 MolWeight:216 RetIndex:1263

CompName:Octanoic acid-TMS ; octanoic acid

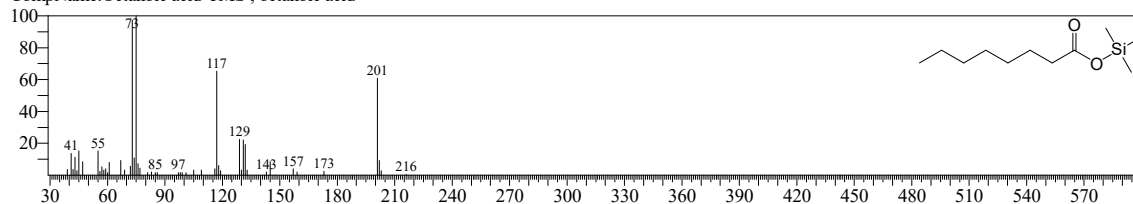

# TNAU

<< Target >>

Line#:8 R.Time:27.755(Scan#:4652) MassPeaks:294

RawMode:Averaged 27.750-27.760(4651-4653) BasePeak:44.00(817)

BG Mode:Calc. from Peak Group 1 - Event 1 Q3 Scan

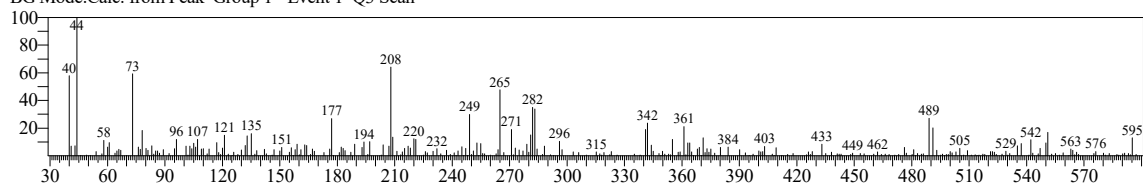

Hit#:1 Entry:184 Library:OA\_TMS\_DB5\_67min\_V3.lib

SI:31 Formula:C<sub>14</sub>H<sub>24</sub>O<sub>3</sub>Si<sub>2</sub> CAS:614-73-5 MolWeight:296 RetIndex:1579

CompName:2-Hydroxyphenylacetic acid-2TMS ; 2-(2-hydroxyphenyl)acetic acid

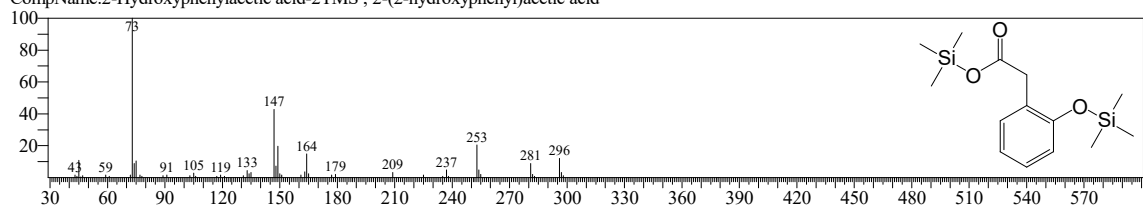

Hit#:2 Entry:310 Library:OA\_TMS\_DB5\_67min\_V3.lib

SI:31 Formula:C<sub>11</sub>H<sub>20</sub>N<sub>4</sub>O<sub>2</sub>Si<sub>2</sub> CAS:68-94-0 MolWeight:280 RetIndex:1822

CompName:Hypoxanthine-2TMS ; 3,7-dihydropurin-6-one

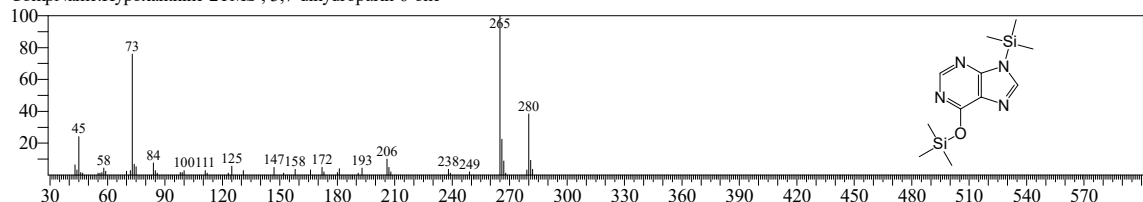

Hit#:3 Entry:200 Library:OA\_TMS\_DB5\_67min\_V3.lib

SI:30 Formula:C<sub>14</sub>H<sub>24</sub>O<sub>3</sub>Si<sub>2</sub> CAS:621-37-4 MolWeight:296 RetIndex:1617

CompName:3-Hydroxyphenylacetic acid-2TMS ; 2-(3-hydroxyphenyl)acetic acid

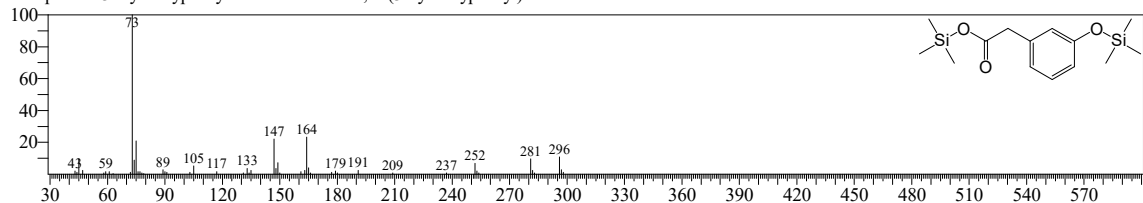

Hit#:4 Entry:220 Library:OA\_TMS\_DB5\_67min\_V3.lib

SI:30 Formula:C<sub>14</sub>H<sub>24</sub>O<sub>3</sub>Si<sub>2</sub> CAS:156-38-7 MolWeight:296 RetIndex:1647

CompName:4-Hydroxyphenylacetic acid-2TMS ; 2-(4-hydroxyphenyl)acetic acid

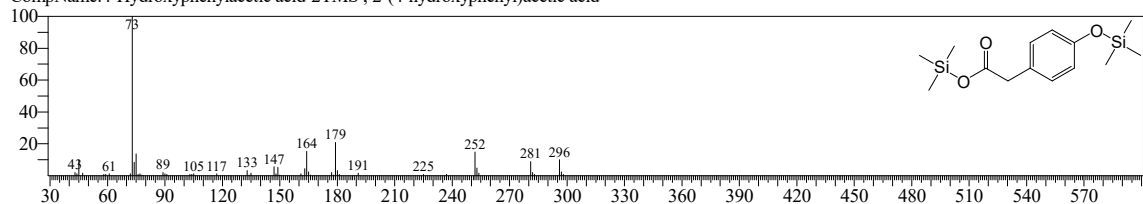

Hit#:5 Entry:384 Library:OA\_TMS\_DB5\_67min\_V3.lib

SI:29 Formula:C<sub>17</sub>H<sub>35</sub>NO<sub>3</sub>Si<sub>3</sub> CAS:65-23-6 MolWeight:385 RetIndex:1919

CompName:Pyridoxine-3TMS ; 4,5-bis(hydroxymethyl)-2-methylpyridin-3-ol

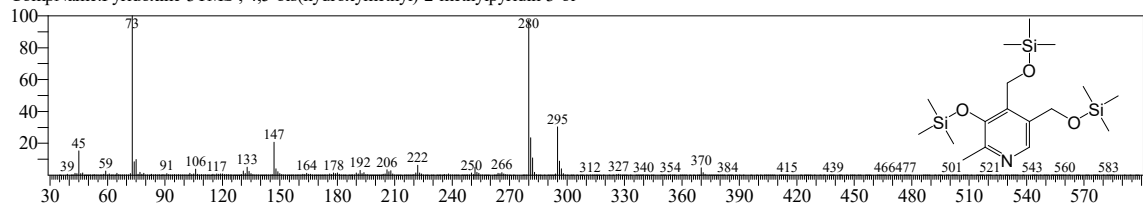

# TNAU

<< Target >>

Line#:9 R.Time:27.780(Scan#:4657) MassPeaks:289

RawMode:Averaged 27.775-27.785(4656-4658) BasePeak:44.00(970)

BG Mode:Calc. from Peak Group 1 - Event 1 Q3 Scan

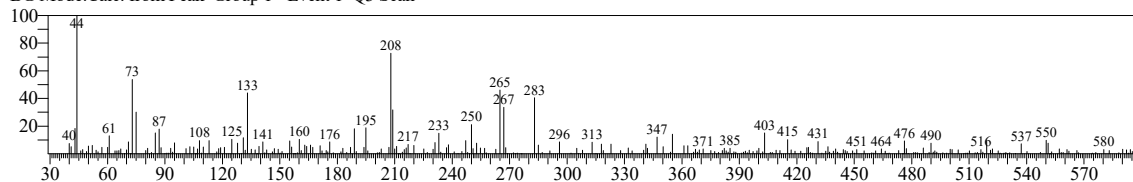

Hit#:1 Entry:310 Library:OA\_TMS\_DB5\_67min\_V3.lib

SI:35 Formula:C11H20N4OSi2 CAS:68-94-0 MolWeight:280 RetIndex:1822

CompName:Hypoxanthine-2TMS ; 3,7-dihydropurin-6-one

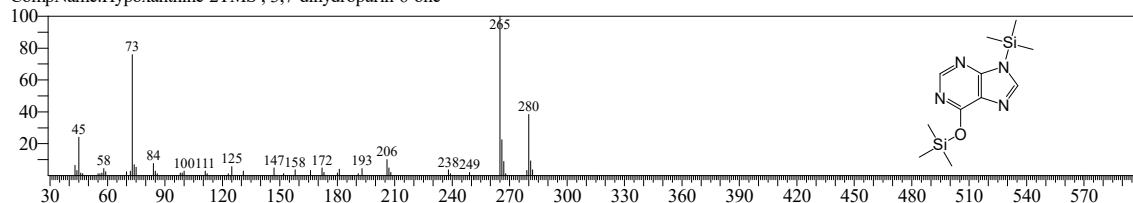

Hit#:2 Entry:329 Library:OA\_TMS\_DB5\_67min\_V3.lib

SI:34 Formula:C11H27NO4SSi2 CAS:820-10-0 MolWeight:325 RetIndex:1848

CompName:Methionine sulfone-2TMS ; 2-amino-4-methylsulfonylbutanoic acid

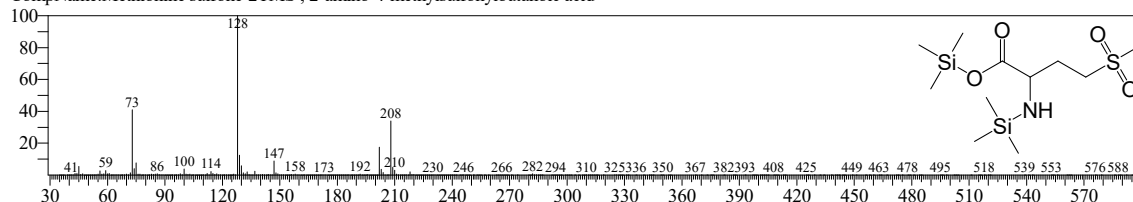

Hit#:3 Entry:343 Library:OA\_TMS\_DB5\_67min\_V3.lib

SI:32 Formula:C18H37NO3Si3 CAS:51-43-4 MolWeight:399 RetIndex:1868

CompName:Epinephrine-3TMS ; 4-[(1R)-1-hydroxy-2-(methylamino)ethyl]benzene-1,2-diol

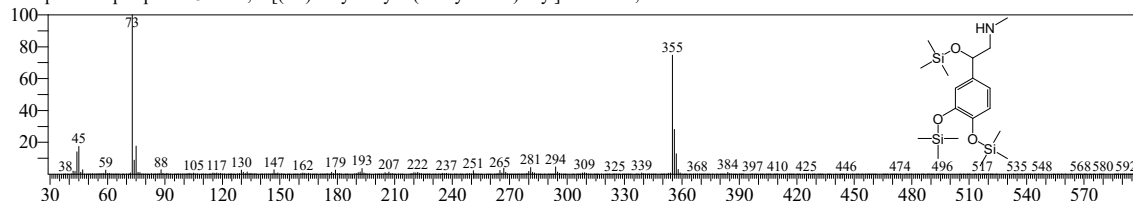

Hit#:4 Entry:3 Library:OA\_TMS\_DB5\_67min\_V3.lib

SI:31 Formula:C9H27BO3Si3 CAS:10043-35-3 MolWeight:278 RetIndex:992

CompName:Boric acid-3TMS ; boric acid

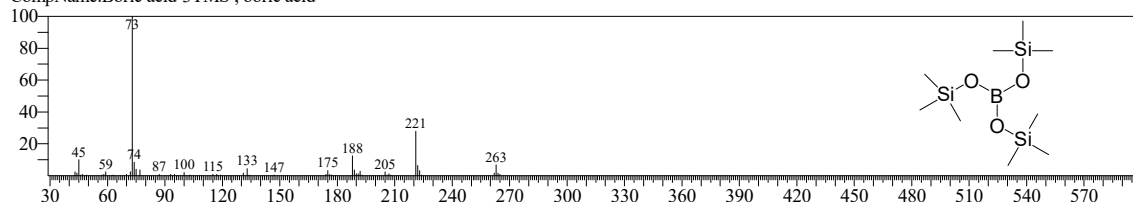

Hit#:5 Entry:528 Library:OA\_TMS\_DB5\_67min\_V3.lib

SI:31 Formula:C17H28Cl2N2O5Si2 CAS:56-75-7 MolWeight:466 RetIndex:2508

CompName:Chloramphenicol-2TMS ; 2,2-dichloro-N-[(1R,2R)-1,3-dihydroxy-1-(4-nitrophenyl)propan-2-yl]acetamide

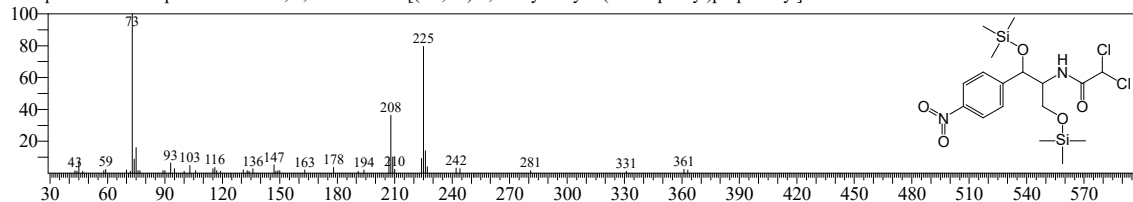

# TNAU

<< Target >>

Line#:10 R.Time:29.135(Scan#:4928) MassPeaks:268

RawMode:Averaged 29.130-29.140(4927-4929) BasePeak:207.05(1957)

BG Mode:Calc. from Peak Group 1 - Event 1 Q3 Scan

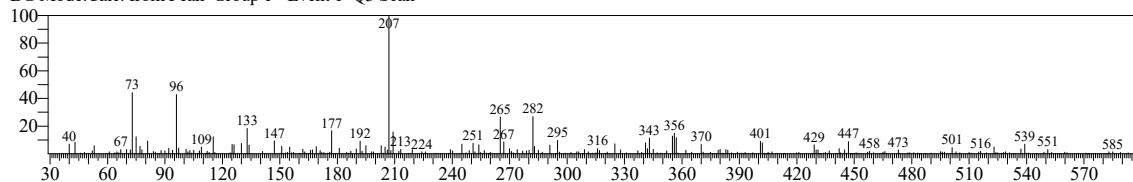

Hit#:1 Entry:402 Library:OA\_TMS\_DB5\_67min\_V3.lib

SI:46 Formula:C20H42O4Si4 CAS:775-01-9 MolWeight:458 RetIndex:1942

CompName:3,4-Dihydroxymandelic acid-4TMS ; 2-(3,4-dihydroxyphenyl)-2-hydroxyacetic acid

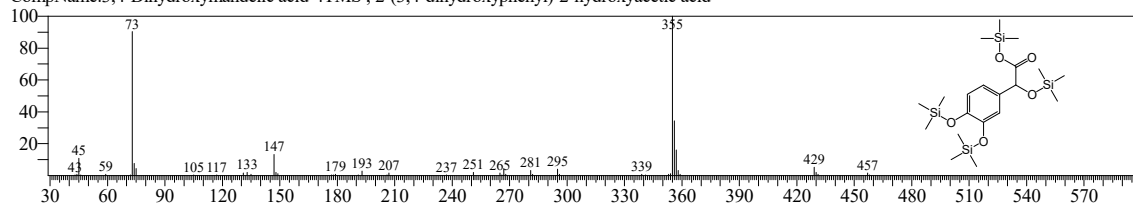

Hit#:2 Entry:343 Library:OA\_TMS\_DB5\_67min\_V3.lib

SI:46 Formula:C18H37NO3Si3 CAS:51-43-4 MolWeight:399 RetIndex:1868

CompName:Epinephrine-3TMS ; 4-[(1R)-1-hydroxy-2-(methylamino)ethyl]benzene-1,2-diol

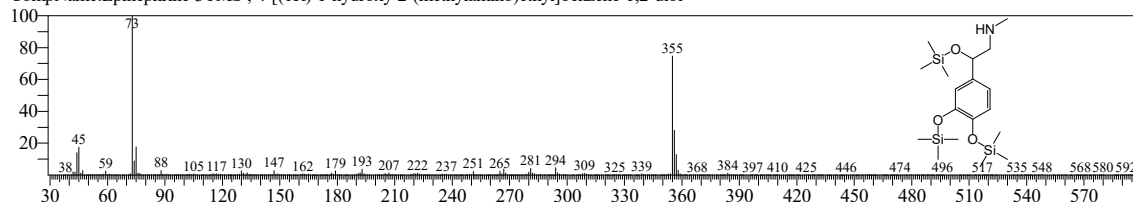

Hit#:3 Entry:332 Library:OA\_TMS\_DB5\_67min\_V3.lib

SI:37 Formula:C17H32O4Si3 CAS:451-13-8 MolWeight:384 RetIndex:1850

CompName:Homogentisic acid-3TMS ; 2-(2,5-dihydroxyphenyl)acetic acid

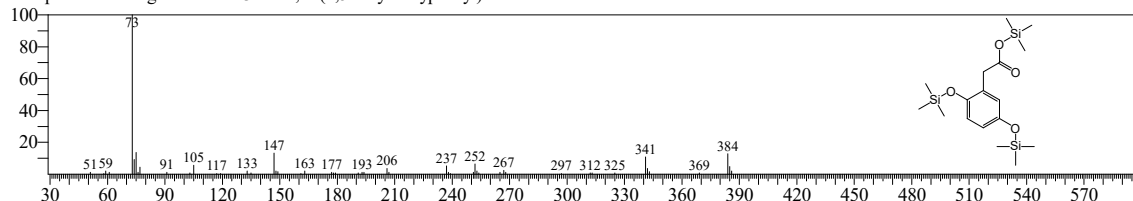

Hit#:4 Entry:13 Library:OA\_TMS\_DB5\_67min\_V3.lib

SI:35 Formula:C8H20O3Si2 CAS:79-14-1 MolWeight:220 RetIndex:1074

CompName:Glycolic acid-2TMS ; 2-hydroxyacetic acid

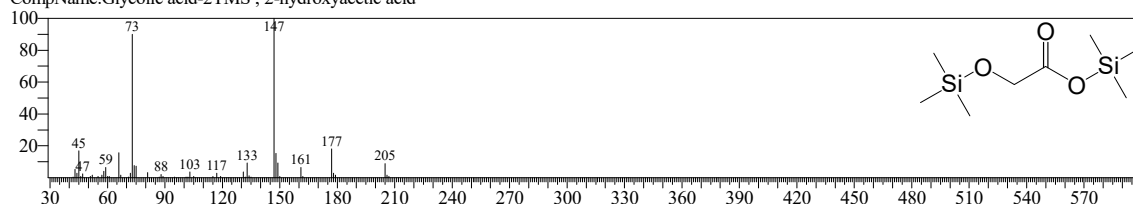

Hit#:5 Entry:290 Library:OA\_TMS\_DB5\_67min\_V3.lib

SI:35 Formula:C13H23NO3Si2 CAS:548-93-6 MolWeight:297 RetIndex:1773

CompName:3-Hydroxyanthranilic acid-2TMS ; 2-amino-3-hydroxybenzoic acid

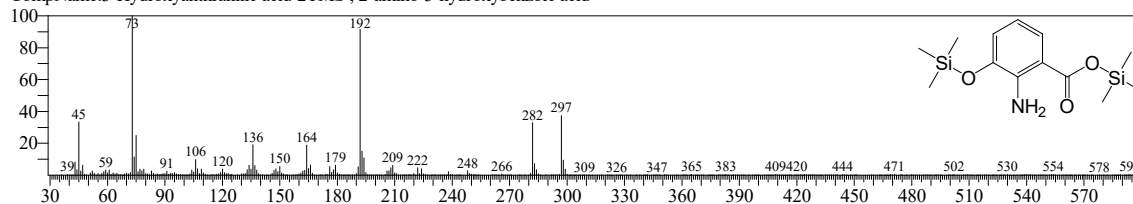

# TNAU

<< Target >>

Line#:11 R.Time:29.170(Scan#:4935) MassPeaks:293

RawMode:Averaged 29.165-29.175(4934-4936) BasePeak:207.05(1012)

BG Mode:Calc. from Peak Group 1 - Event 1 Q3 Scan

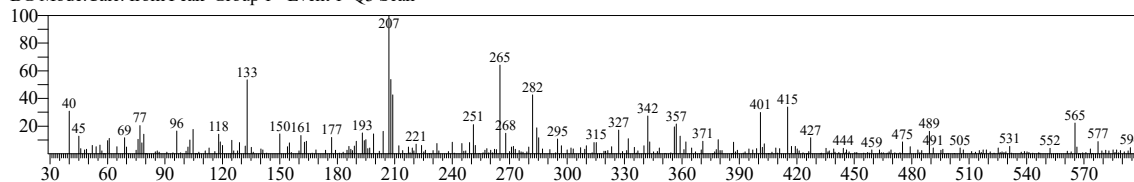

Hit#:1 Entry:330 Library:OA\_TMS\_DB5\_67min\_V3.lib

SI:25 Formula:C12H17NO3Si CAS:66407-11-2 MolWeight:251 RetIndex:1849

CompName:Hippuric acid-TMS ; 2-benzamidoacetic acid

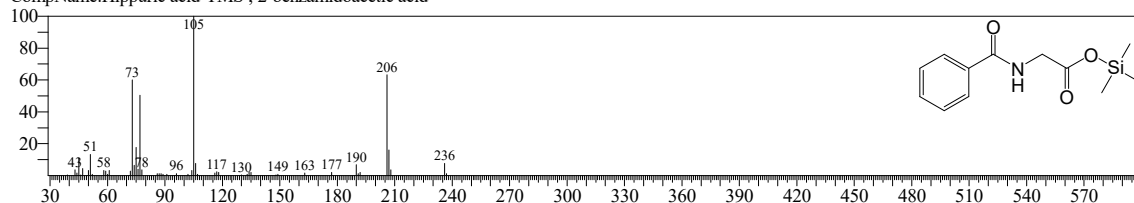

Hit#:2 Entry:420 Library:OA\_TMS\_DB5\_67min\_V3.lib

SI:23 Formula:C18H33NO4Si3 CAS:487-54-7 MolWeight:411 RetIndex:1973

CompName:2-Hydroxyhippuric acid-3TMS ; 2-[(2-hydroxybenzoyl)amino]acetic acid

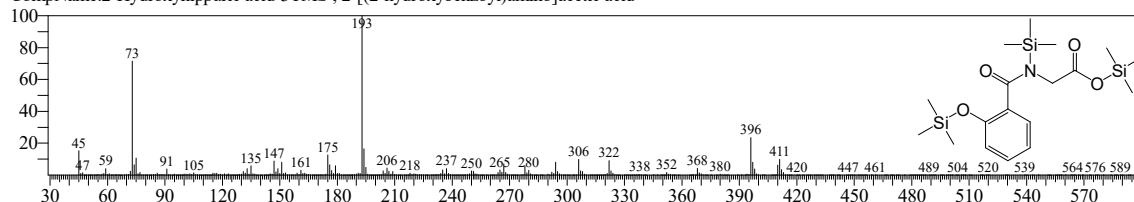

Hit#:3 Entry:310 Library:OA\_TMS\_DB5\_67min\_V3.lib

SI:23 Formula:C11H20N4OSi2 CAS:68-94-0 MolWeight:280 RetIndex:1822

CompName:Hypoxanthine-2TMS ; 3,7-dihydropurin-6-one

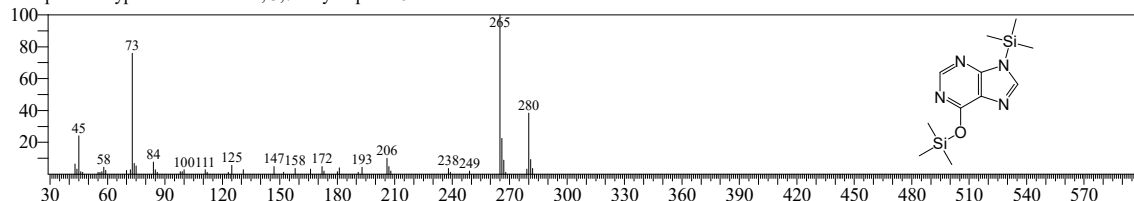

Hit#:4 Entry:315 Library:OA\_TMS\_DB5\_67min\_V3.lib

SI:23 Formula:C16H30O4Si3 CAS:99-50-3 MolWeight:370 RetIndex:1833

CompName:Protocatechuic acid-3TMS ; 3,4-dihydroxybenzoic acid

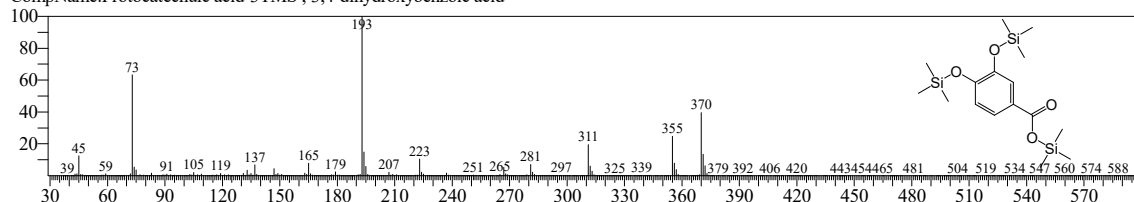

Hit#:5 Entry:308 Library:OA\_TMS\_DB5\_67min\_V3.lib

SI:22 Formula:C19H42O5Si4 CAS:138-59-0 MolWeight:462 RetIndex:1819

CompName:Shikimic acid-4TMS ; 3,4,5-trihydroxycyclohexene-1-carboxylic acid

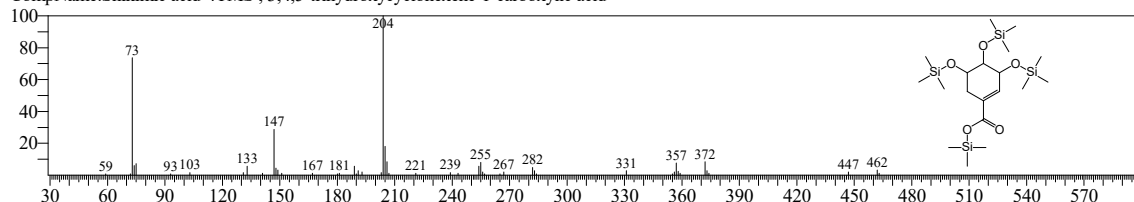

# TNAU

<< Target >>

Line#:12 R.Time:29.560(Scan#:5013) MassPeaks:328

RawMode:Averaged 29.555-29.565(5012-5014) BasePeak:44.00(982)

BG Mode:Calc. from Peak Group 1 - Event 1 Q3 Scan

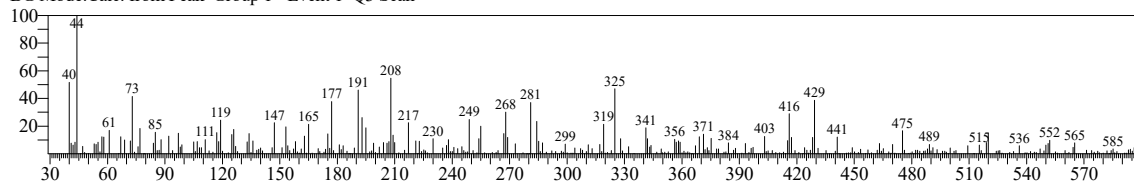

Hit#:1 Entry:150 Library:OA\_TMS\_DB5\_67min\_V3.lib

SI:33 Formula:C<sub>15</sub>H<sub>26</sub>O<sub>3</sub>Si<sub>2</sub> CAS:515-30-0 MolWeight:310 RetIndex:1517

CompName:2-Phenyllactic acid-2TMS ; 2-hydroxy-3-phenylpropanoic acid

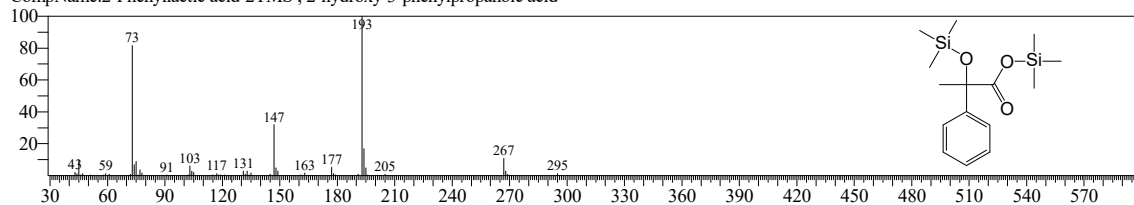

Hit#:2 Entry:211 Library:OA\_TMS\_DB5\_67min\_V3.lib

SI:31 Formula:C<sub>13</sub>H<sub>22</sub>O<sub>3</sub>Si<sub>2</sub> CAS:99-96-7 MolWeight:282 RetIndex:1636

CompName:4-Hydroxybenzoic acid-2TMS ; 4-hydroxybenzoic acid

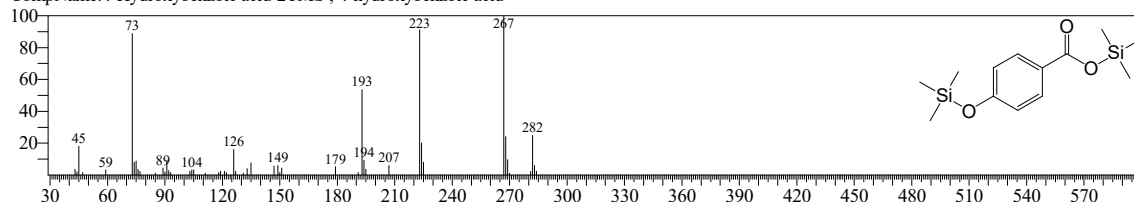

Hit#:3 Entry:179 Library:OA\_TMS\_DB5\_67min\_V3.lib

SI:31 Formula:C<sub>13</sub>H<sub>22</sub>O<sub>3</sub>Si<sub>2</sub> CAS:99-06-9 MolWeight:282 RetIndex:1572

CompName:3-Hydroxybenzoic acid-2TMS ; 3-hydroxybenzoic acid

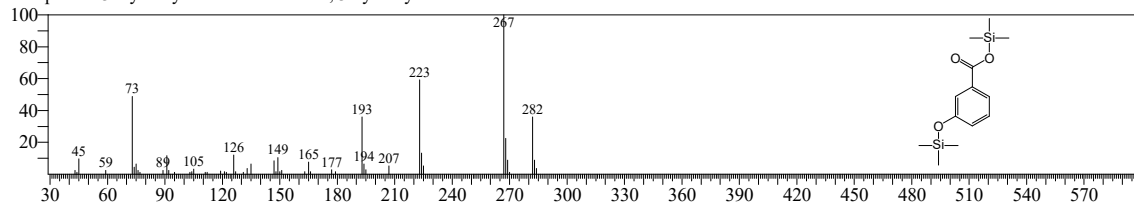

Hit#:4 Entry:194 Library:OA\_TMS\_DB5\_67min\_V3.lib

SI:29 Formula:C<sub>15</sub>H<sub>26</sub>O<sub>3</sub>Si<sub>2</sub> CAS:828-01-3 MolWeight:310 RetIndex:1599

CompName:3-Phenyllactic acid-2TMS ; 2-hydroxy-3-phenylpropanoic acid

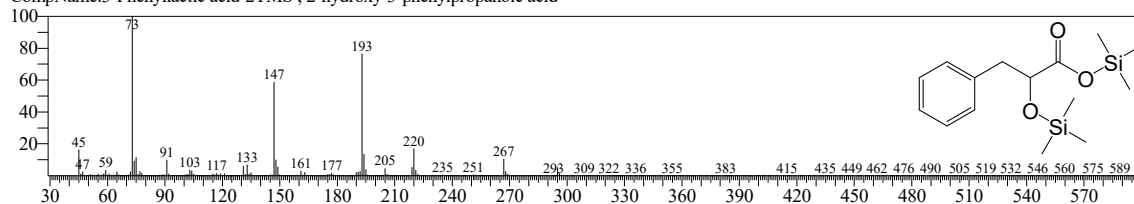

Hit#:5 Entry:328 Library:OA\_TMS\_DB5\_67min\_V3.lib

SI:28 Formula:C<sub>13</sub>H<sub>23</sub>NO<sub>2</sub>Si<sub>2</sub> CAS:150-13-0 MolWeight:281 RetIndex:1845

CompName:4-Aminobenzoic acid-2TMS ; 4-aminobenzoic acid

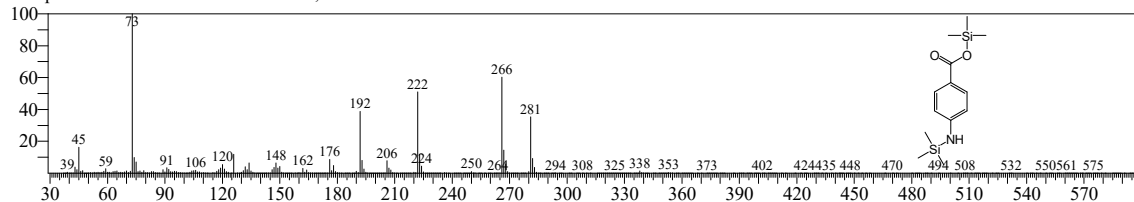

# TNAU

<< Target >>

Line#:13 R.Time:29.625(Scan#:5026) MassPeaks:305

RawMode:Averaged 29.620-29.630(5025-5027) BasePeak:207.05(885)

BG Mode:Calc. from Peak Group 1 - Event 1 Q3 Scan

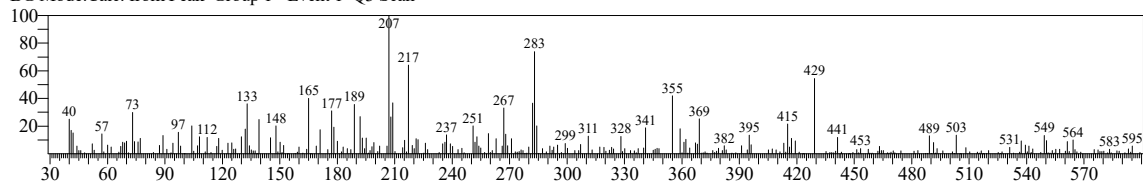

Hit#:1 Entry:179 Library:OA\_TMS\_DB5\_67min\_V3.lib

SI:33 Formula:C<sub>13</sub>H<sub>22</sub>O<sub>3</sub>Si<sub>2</sub> CAS:99-06-9 MolWeight:282 RetIndex:1572

CompName:3-Hydroxybenzoic acid-2TMS ; 3-hydroxybenzoic acid

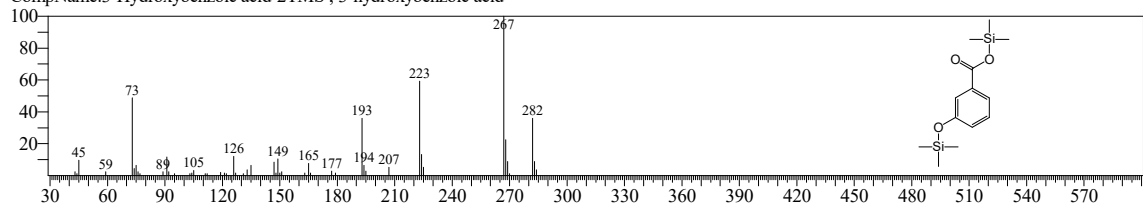

Hit#:2 Entry:290 Library:OA\_TMS\_DB5\_67min\_V3.lib

SI:30 Formula:C<sub>13</sub>H<sub>23</sub>NO<sub>3</sub>Si<sub>2</sub> CAS:548-93-6 MolWeight:297 RetIndex:1773

CompName:3-Hydroxyanthranilic acid-2TMS ; 2-amino-3-hydroxybenzoic acid

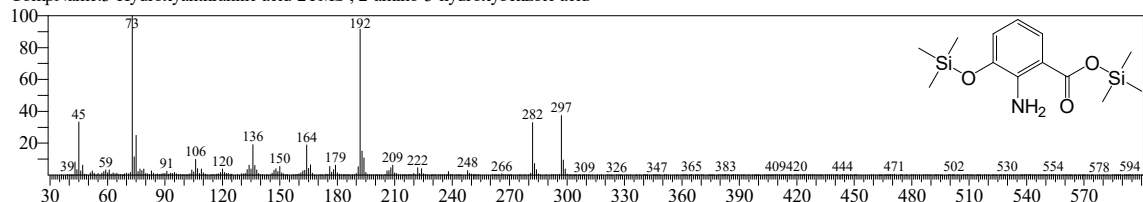

Hit#:3 Entry:402 Library:OA\_TMS\_DB5\_67min\_V3.lib

SI:29 Formula:C<sub>20</sub>H<sub>42</sub>O<sub>4</sub>Si<sub>4</sub> CAS:775-01-9 MolWeight:458 RetIndex:1942

CompName:3,4-Dihydroxymandelic acid-4TMS ; 2-(3,4-dihydroxyphenyl)-2-hydroxyacetic acid

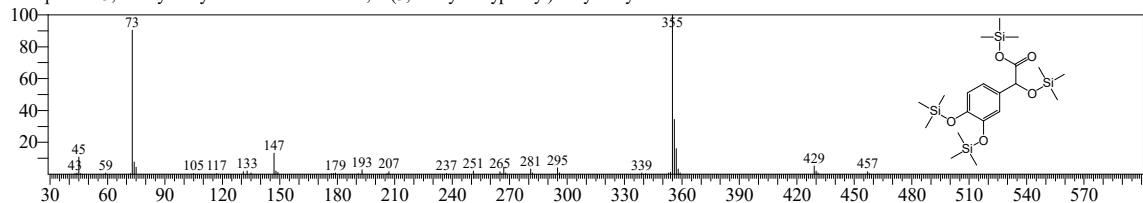

Hit#:4 Entry:535 Library:OA\_TMS\_DB5\_67min\_V3.lib

SI:29 Formula:C<sub>22</sub>H<sub>44</sub>N<sub>4</sub>O<sub>5</sub>Si<sub>4</sub> CAS:58-63-9 MolWeight:556 RetIndex:2605

CompName:Inosine-4TMS ; 9-[(2R,3R,4S,5R)-3,4-dihydroxy-5-(hydroxymethyl)oxolan-2-yl]-3H-purin-6-one

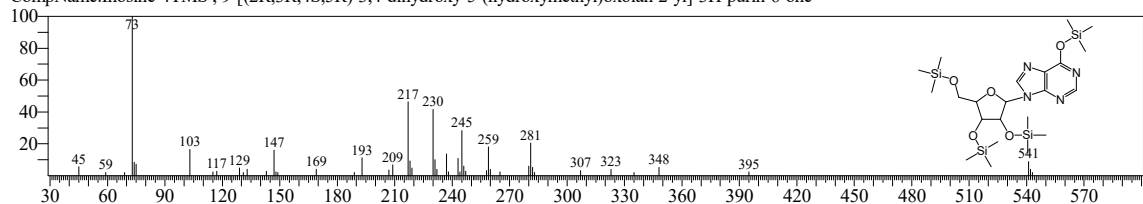

Hit#:5 Entry:294 Library:OA\_TMS\_DB5\_67min\_V3.lib

SI:28 Formula:C<sub>15</sub>H<sub>26</sub>O<sub>4</sub>Si<sub>2</sub> CAS:306-08-1 MolWeight:326 RetIndex:1782

CompName:Homovanillic acid-2TMS ; 2-(4-hydroxy-3-methoxyphenyl)acetic acid

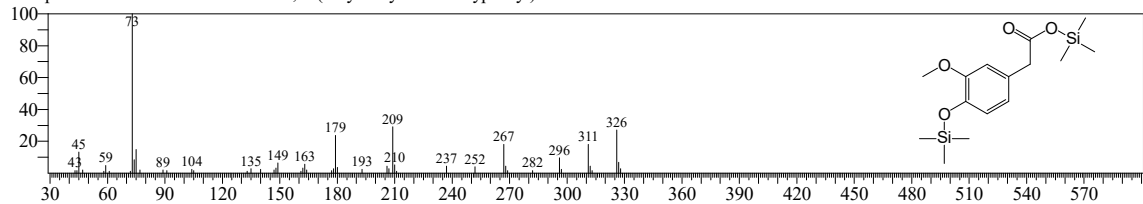

# TNAU

<< Target >>

Line#:14 R.Time:30.040(Scan#:5109) MassPeaks:288

RawMode:Averaged 30.035-30.045(5108-5110) BasePeak:208.00(843)

BG Mode:Calc. from Peak Group 1 - Event 1 Q3 Scan

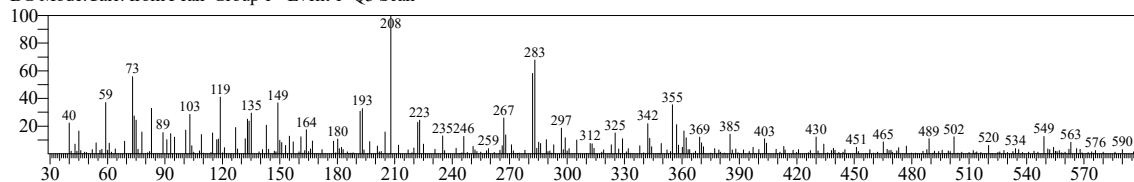

Hit#:1 Entry:290 Library:OA\_TMS\_DB5\_67min\_V3.lib

SI:45 Formula:C13H23NO3Si2 CAS:548-93-6 MolWeight:297 RetIndex:1773

CompName:3-Hydroxyanthranilic acid-2TMS ; 2-amino-3-hydroxybenzoic acid

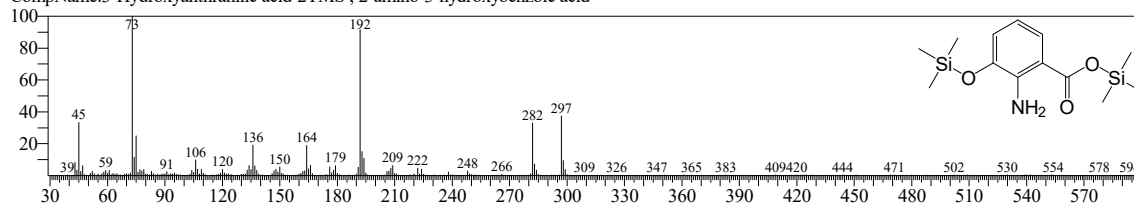

Hit#:2 Entry:211 Library:OA\_TMS\_DB5\_67min\_V3.lib

SI:43 Formula:C13H22O3Si2 CAS:99-96-7 MolWeight:282 RetIndex:1636

CompName:4-Hydroxybenzoic acid-2TMS ; 4-hydroxybenzoic acid



Hit#:3 Entry:179 Library:OA\_TMS\_DB5\_67min\_V3.lib

SI:42 Formula:C13H22O3Si2 CAS:99-06-9 MolWeight:282 RetIndex:1572

CompName:3-Hydroxybenzoic acid-2TMS ; 3-hydroxybenzoic acid



Hit#:4 Entry:328 Library:OA\_TMS\_DB5\_67min\_V3.lib

SI:42 Formula:C13H23NO2Si2 CAS:150-13-0 MolWeight:281 RetIndex:1845

CompName:4-Aminobenzoic acid-2TMS ; 4-aminobenzoic acid

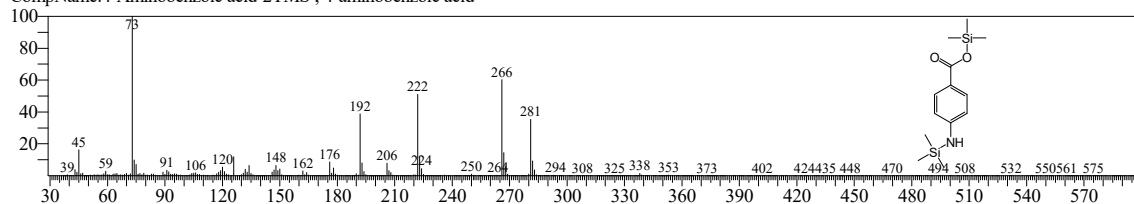

Hit#:5 Entry:291 Library:OA\_TMS\_DB5\_67min\_V3.lib

SI:41 Formula:C14H24O4Si2 CAS:121-34-6 MolWeight:312 RetIndex:1775

CompName:3-Methoxy-4-hydroxybenzoic acid-2TMS ; 4-hydroxy-3-methoxybenzoic acid

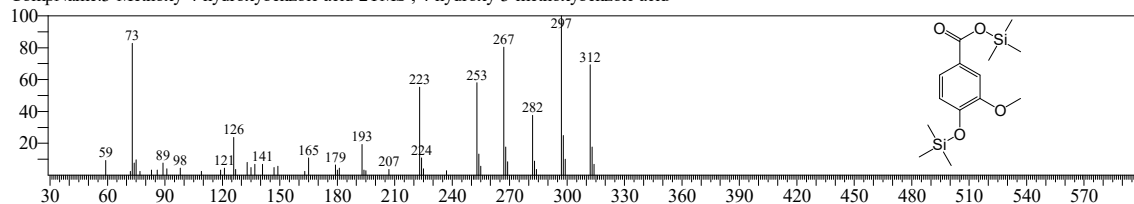



# TNAU

<< Target >>

Line#:15 R.Time:30.645(Scan#:5230) MassPeaks:312

RawMode:Averaged 30.640-30.650(5229-5231) BasePeak:207.05(1617)

BG Mode:Calc. from Peak Group 1 - Event 1 Q3 Scan

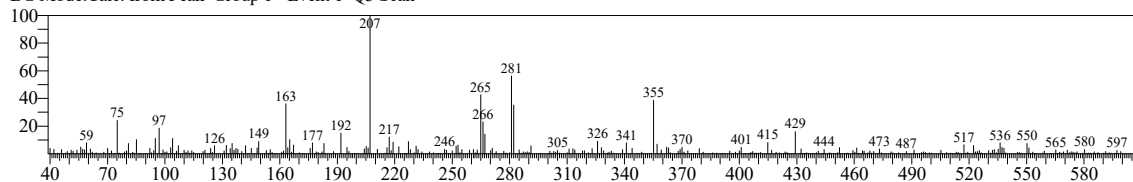

Hit#:1 Entry:402 Library:OA\_TMS\_DB5\_67min\_V3.lib

SI:34 Formula:C20H42O4Si4 CAS:775-01-9 MolWeight:458 RetIndex:1942

CompName:3,4-Dihydroxymandelic acid-4TMS ; 2-(3,4-dihydroxyphenyl)-2-hydroxyacetic acid

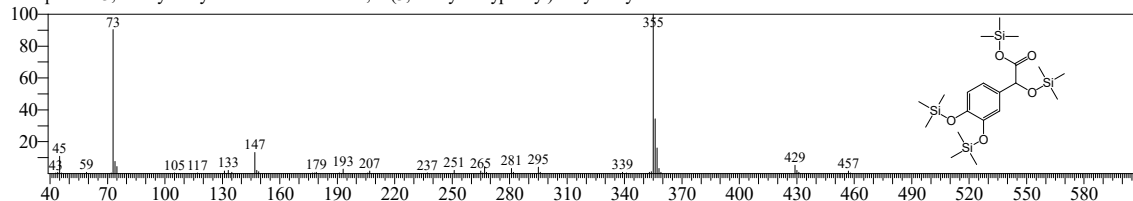

Hit#:2 Entry:310 Library:OA\_TMS\_DB5\_67min\_V3.lib

SI:32 Formula:C11H20N4OSi2 CAS:68-94-0 MolWeight:280 RetIndex:1822

CompName:Hypoxanthine-2TMS ; 3,7-dihydropurin-6-one

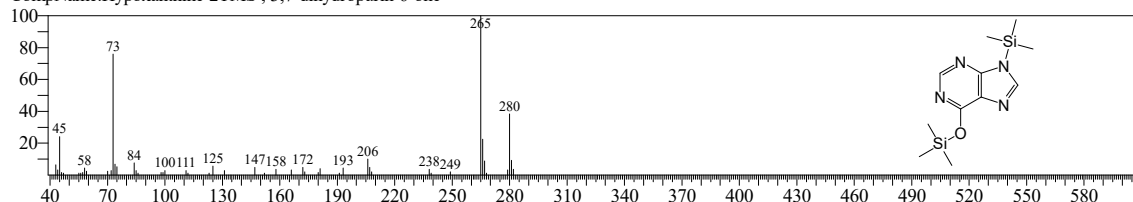

Hit#:3 Entry:179 Library:OA\_TMS\_DB5\_67min\_V3.lib

SI:30 Formula:C13H22O3Si2 CAS:99-06-9 MolWeight:282 RetIndex:1572

CompName:3-Hydroxybenzoic acid-2TMS ; 3-hydroxybenzoic acid

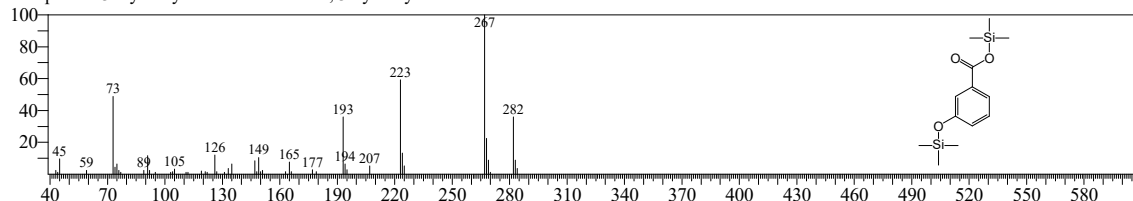

Hit#:4 Entry:203 Library:OA\_TMS\_DB5\_67min\_V3.lib

SI:28 Formula:C13H23NO2Si2 CAS:118-92-3 MolWeight:281 RetIndex:1623

CompName:Anthranilic acid-2TMS ; 2-aminobenzoic acid

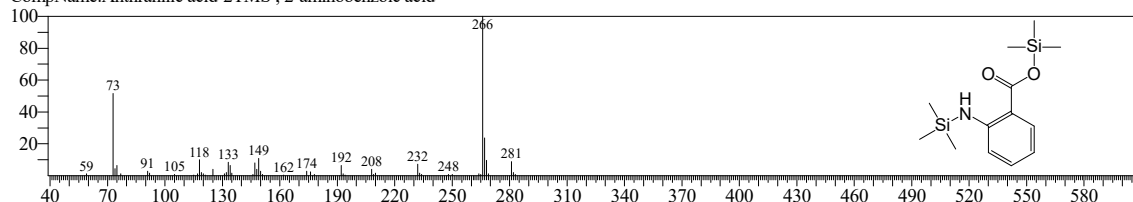

Hit#:5 Entry:341 Library:OA\_TMS\_DB5\_67min\_V3.lib

SI:27 Formula:C18H34O4Si3 CAS:3247-75-4 MolWeight:398 RetIndex:1864

CompName:3-(3-Hydroxyphenyl)-3-hydroxypropionic acid-3TMS ; 3-hydroxy-3-(3-hydroxyphenyl)propanoic acid

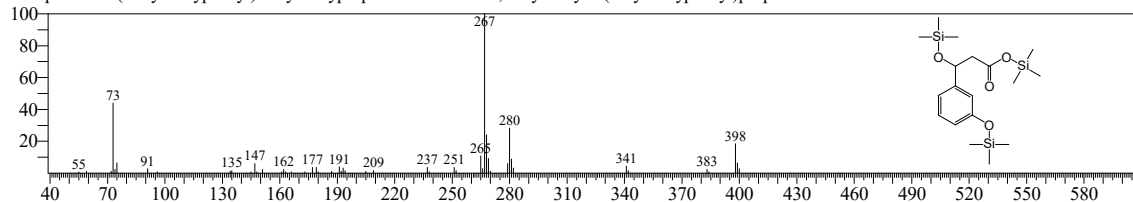

# TNAU

<< Target >>

Line#:16 R.Time:30.785(Scan#:5258) MassPeaks:303

RawMode:Averaged 30.780-30.790(5257-5259) BasePeak:207.05(1874)

BG Mode:Calc. from Peak Group 1 - Event 1 Q3 Scan

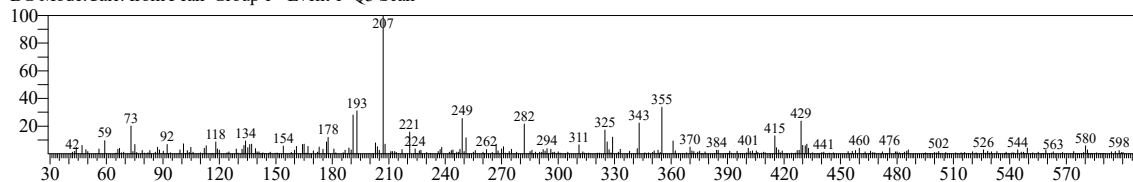

Hit#:1 Entry:315 Library:OA\_TMS\_DB5\_67min\_V3.lib

SI:39 Formula:C16H30O4Si3 CAS:99-50-3 MolWeight:370 RetIndex:1833

CompName:Protocatechuic acid-3TMS ; 3,4-dihydroxybenzoic acid

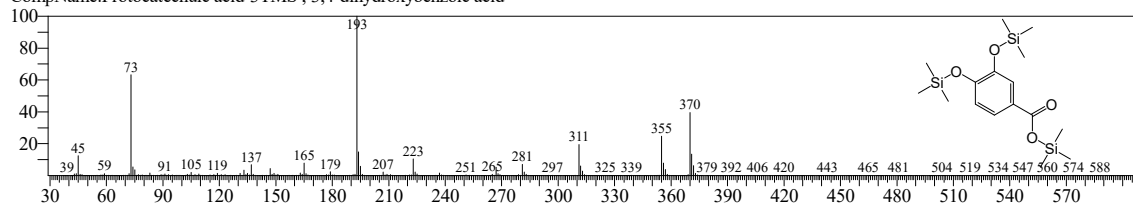

Hit#:2 Entry:402 Library:OA\_TMS\_DB5\_67min\_V3.lib

SI:39 Formula:C20H42O4Si4 CAS:775-01-9 MolWeight:458 RetIndex:1942

CompName:3,4-Dihydroxymandelic acid-4TMS ; 2-(3,4-dihydroxyphenyl)-2-hydroxyacetic acid

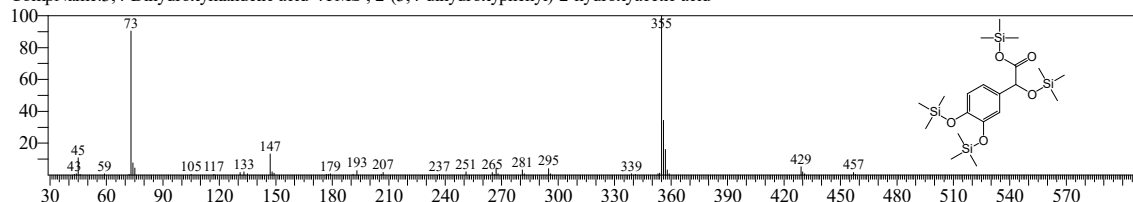

Hit#:3 Entry:343 Library:OA\_TMS\_DB5\_67min\_V3.lib

SI:37 Formula:C18H37NO3Si3 CAS:51-43-4 MolWeight:399 RetIndex:1868

CompName:Epinephrine-3TMS ; 4-[(1R)-1-hydroxy-2-(methylamino)ethyl]benzene-1,2-diol

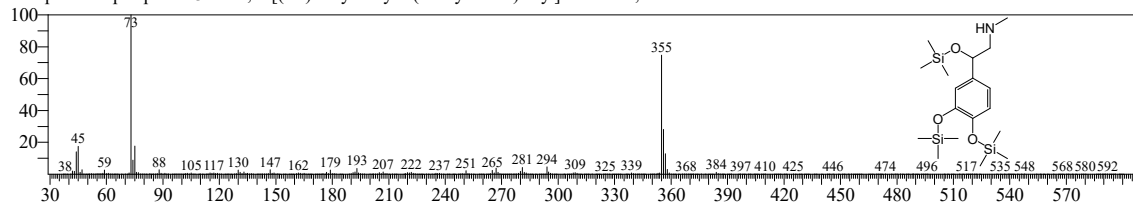

Hit#:4 Entry:290 Library:OA\_TMS\_DB5\_67min\_V3.lib

SI:34 Formula:C13H23NO3Si2 CAS:548-93-6 MolWeight:297 RetIndex:1773

CompName:3-Hydroxyanthranilic acid-2TMS ; 2-amino-3-hydroxybenzoic acid

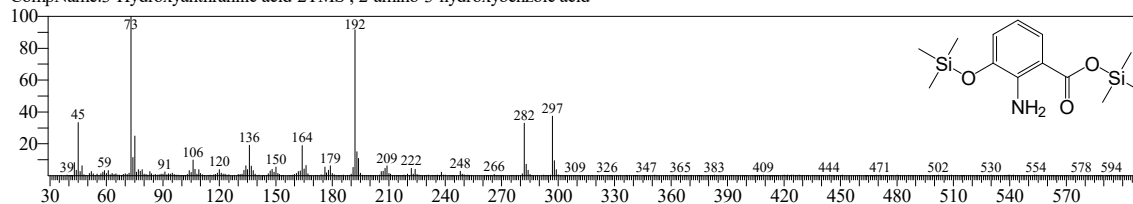

Hit#:5 Entry:179 Library:OA\_TMS\_DB5\_67min\_V3.lib

SI:33 Formula:C13H22O3Si2 CAS:99-06-9 MolWeight:282 RetIndex:1572

CompName:3-Hydroxybenzoic acid-2TMS ; 3-hydroxybenzoic acid

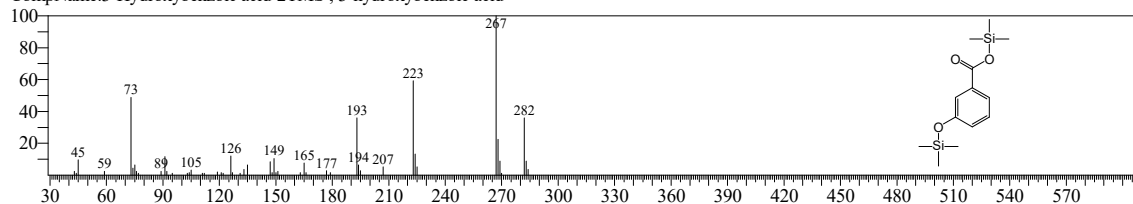

# TNAU

<< Target >>

Line#:17 R.Time:31.235(Scan#:5348) MassPeaks:313

RawMode:Averaged 31.230-31.240(5347-5349) BasePeak:207.05(1085)

BG Mode:Calc. from Peak Group 1 - Event 1 Q3 Scan

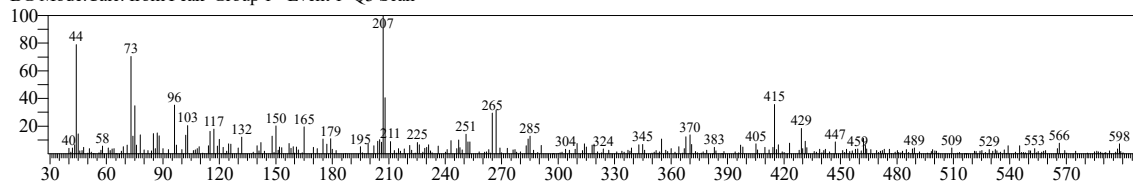

Hit#:1 Entry:528 Library:OA\_TMS\_DB5\_67min\_V3.lib

SI:40 Formula:C17H28Cl2N2O5Si2 CAS:56-75-7 MolWeight:466 RetIndex:2508

CompName:Chloramphenicol-2TMS ; 2,2-dichloro-N-[(1R,2R)-1,3-dihydroxy-1-(4-nitrophenyl)propan-2-yl]acetamide

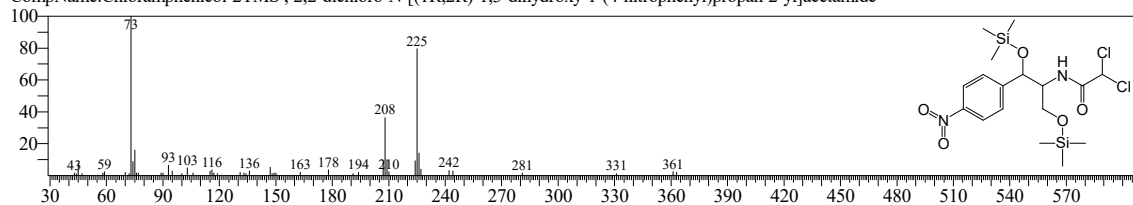

Hit#:2 Entry:343 Library:OA\_TMS\_DB5\_67min\_V3.lib

SI:40 Formula:C18H37NO3Si3 CAS:51-43-4 MolWeight:399 RetIndex:1868

CompName:Epinephrine-3TMS ; 4-[(1R)-1-hydroxy-2-(methylamino)ethyl]benzene-1,2-diol

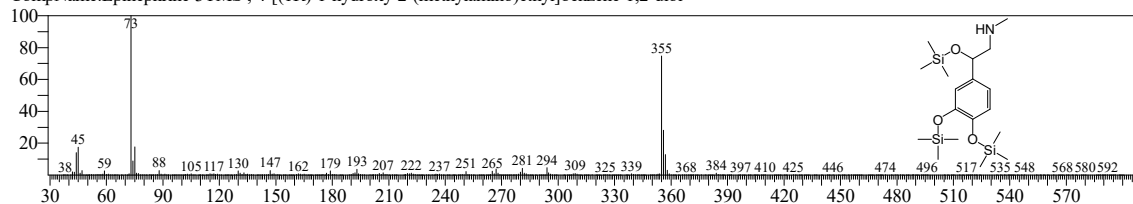

Hit#:3 Entry:77 Library:OA\_TMS\_DB5\_67min\_V3.lib

SI:38 Formula:C12H32O3Si3 CAS:56-81-5 MolWeight:308 RetIndex:1279

CompName:Glycerol-3TMS ; propane-1,2,3-triol

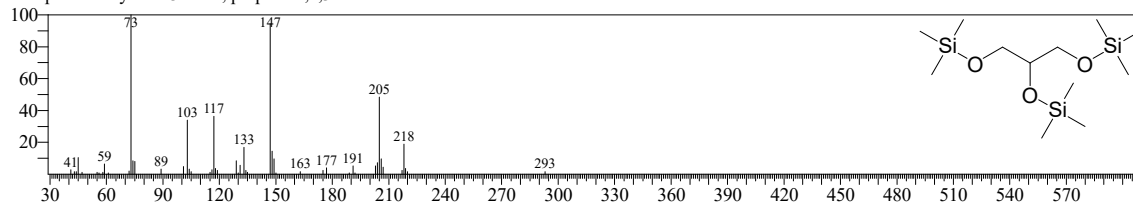

Hit#:4 Entry:402 Library:OA\_TMS\_DB5\_67min\_V3.lib

SI:38 Formula:C20H42O4Si4 CAS:775-01-9 MolWeight:458 RetIndex:1942

CompName:3,4-Dihydroxymandelic acid-4TMS ; 2-(3,4-dihydroxyphenyl)-2-hydroxyacetic acid

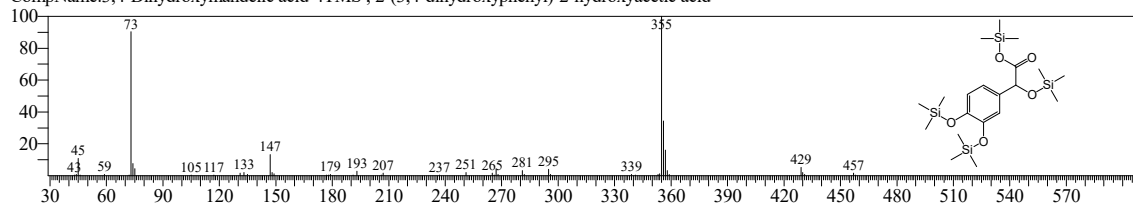

Hit#:5 Entry:163 Library:OA\_TMS\_DB5\_67min\_V3.lib

SI:37 Formula:C10H22O4SSi2 CAS:123-93-3 MolWeight:294 RetIndex:1537

CompName:Thiodiglycolic acid-2TMS ; 2-(carboxymethylsulfanyl)acetic acid

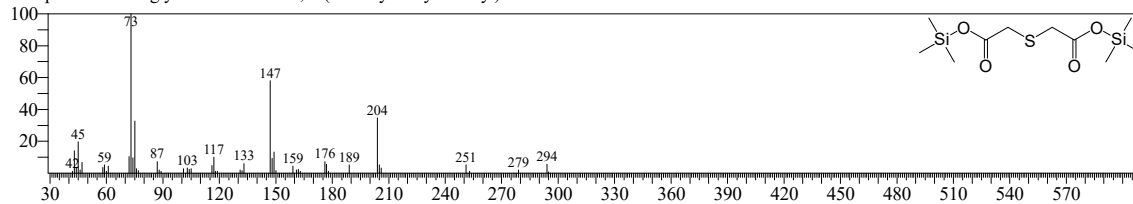

# TNAU

<< Target >>

Line#:18 R.Time:31.290(Scan#:5359) MassPeaks:283

RawMode:Averaged 31.285-31.295(5358-5360) BasePeak:207.00(1682)

BG Mode:Calc. from Peak Group 1 - Event 1 Q3 Scan

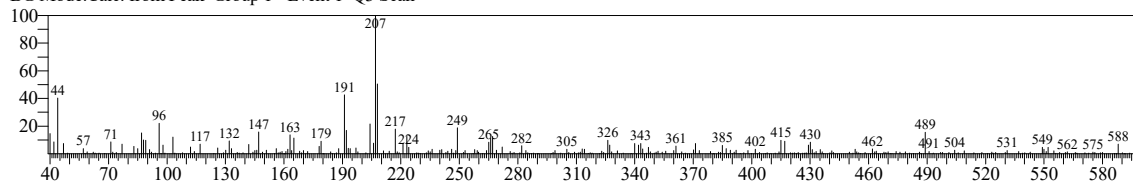

Hit#:1 Entry:386 Library:OA\_TMS\_DB5\_67min\_V3.lib

SI:35 Formula:C<sub>21</sub>H<sub>52</sub>O<sub>6</sub>Si<sub>5</sub> CAS:50-99-7 MolWeight:540 RetIndex:1922

CompName:Glucose-5TMS(1) ; (3R,4S,5S,6R)-6-(hydroxymethyl)oxane-2,3,4,5-tetrol

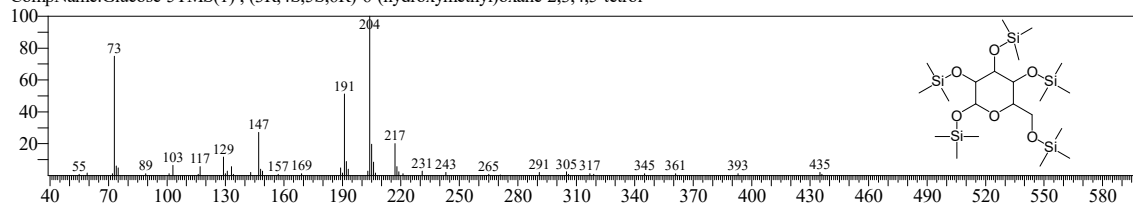

Hit#:2 Entry:311 Library:OA\_TMS\_DB5\_67min\_V3.lib

SI:35 Formula:C<sub>21</sub>H<sub>52</sub>O<sub>6</sub>Si<sub>5</sub> CAS:59-23-4 MolWeight:540 RetIndex:1824

CompName:Galactose-5TMS(1) ; (3R,4S,5R,6R)-6-(hydroxymethyl)oxane-2,3,4,5-tetrol

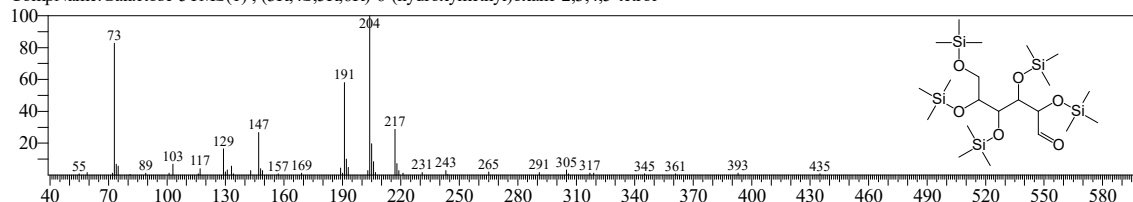

Hit#:3 Entry:349 Library:OA\_TMS\_DB5\_67min\_V3.lib

SI:34 Formula:C<sub>21</sub>H<sub>52</sub>O<sub>6</sub>Si<sub>5</sub> CAS:2595-97-3 MolWeight:540 RetIndex:1874

CompName:Allose-5TMS ; (2R,3R,4R,5R)-2,3,4,5,6-pentahydroxyhexanal

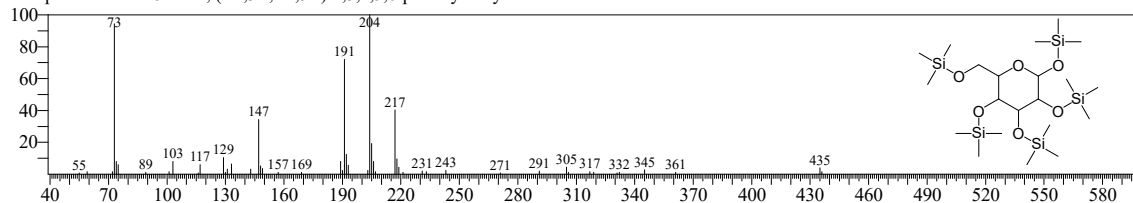

Hit#:4 Entry:288 Library:OA\_TMS\_DB5\_67min\_V3.lib

SI:34 Formula:C<sub>21</sub>H<sub>52</sub>O<sub>6</sub>Si<sub>5</sub> CAS:3458-28-4 MolWeight:540 RetIndex:1771

CompName:Mannose-5TMS(1) ; (3S,4S,5S,6R)-6-(hydroxymethyl)oxane-2,3,4,5-tetrol

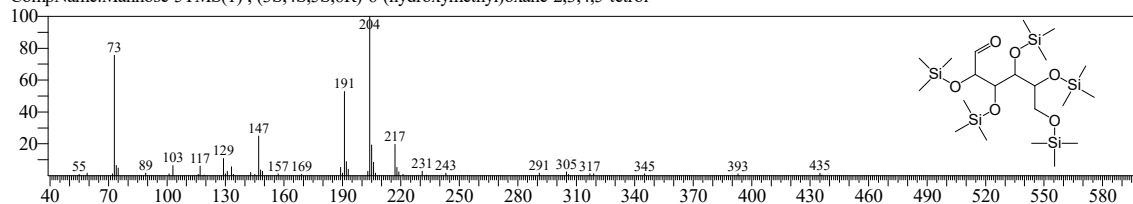

Hit#:5 Entry:252 Library:OA\_TMS\_DB5\_67min\_V3.lib

SI:33 Formula:C<sub>18</sub>H<sub>44</sub>O<sub>5</sub>Si<sub>4</sub> CAS:3615-37-0 MolWeight:452 RetIndex:1695

CompName:Fucose-4TMS(1) ; (2S,3R,4S,5R,6R)-6-methyloxane-2,3,4,5-tetrol

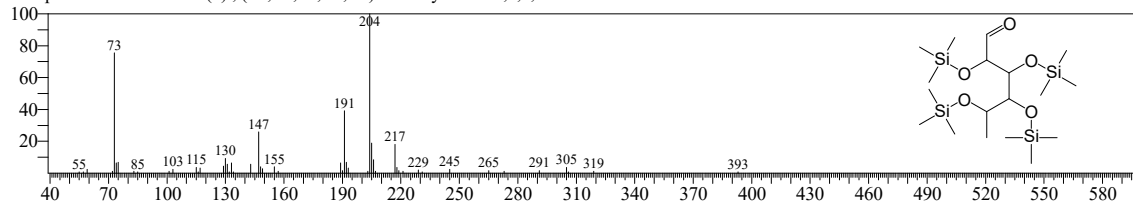

# TNAU

<< Target >>

Line#:19 R.Time:31.665(Scan#:5434) MassPeaks:315

RawMode:Averaged 31.660-31.670(5433-5435) BasePeak:44.00(680)

BG Mode:Calc. from Peak Group 1 - Event 1 Q3 Scan

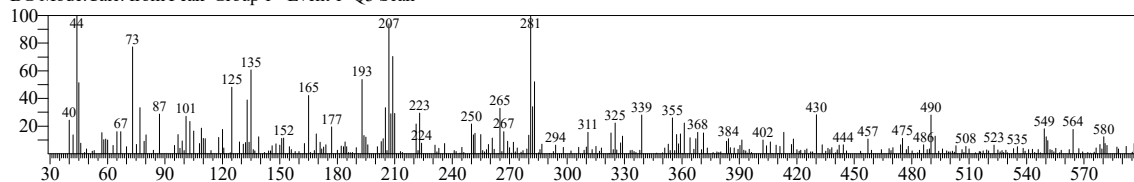

Hit#:1 Entry:211 Library:OA\_TMS\_DB5\_67min\_V3.lib

SI:39 Formula:C<sub>13</sub>H<sub>22</sub>O<sub>3</sub>Si<sub>2</sub> CAS:99-96-7 MolWeight:282 RetIndex:1636

CompName:4-Hydroxybenzoic acid-2TMS ; 4-hydroxybenzoic acid

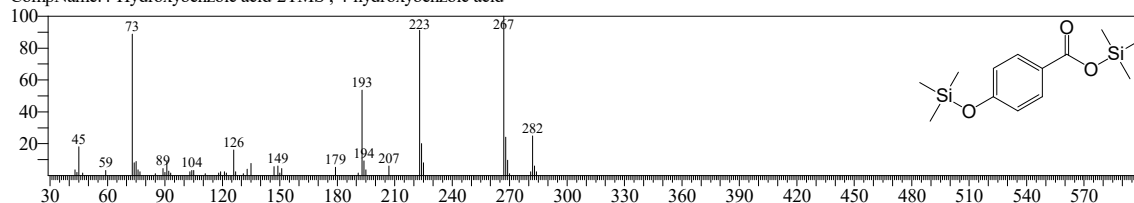

Hit#:2 Entry:315 Library:OA\_TMS\_DB5\_67min\_V3.lib

SI:38 Formula:C<sub>16</sub>H<sub>30</sub>O<sub>4</sub>Si<sub>3</sub> CAS:99-50-3 MolWeight:370 RetIndex:1833

CompName:Protocatechuic acid-3TMS ; 3,4-dihydroxybenzoic acid

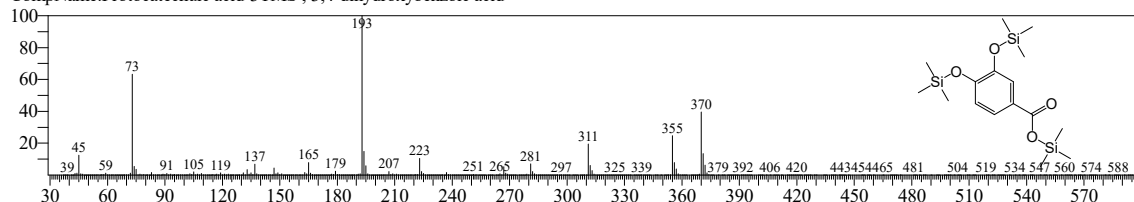

Hit#:3 Entry:179 Library:OA\_TMS\_DB5\_67min\_V3.lib

SI:36 Formula:C<sub>13</sub>H<sub>22</sub>O<sub>3</sub>Si<sub>2</sub> CAS:99-06-9 MolWeight:282 RetIndex:1572

CompName:3-Hydroxybenzoic acid-2TMS ; 3-hydroxybenzoic acid

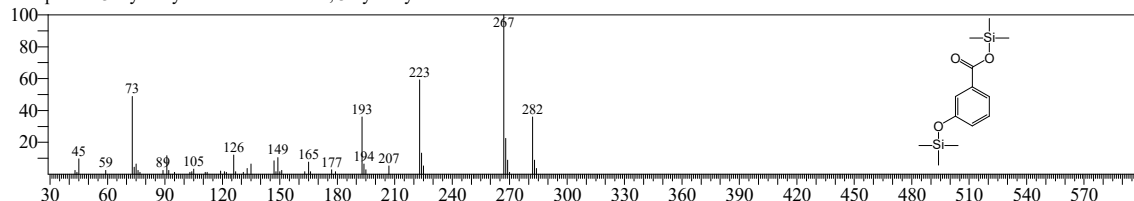

Hit#:4 Entry:343 Library:OA\_TMS\_DB5\_67min\_V3.lib

SI:34 Formula:C<sub>18</sub>H<sub>37</sub>NO<sub>3</sub>Si<sub>3</sub> CAS:51-43-4 MolWeight:399 RetIndex:1868

CompName:Epinephrine-3TMS ; 4-[(1R)-1-hydroxy-2-(methylamino)ethyl]benzene-1,2-diol

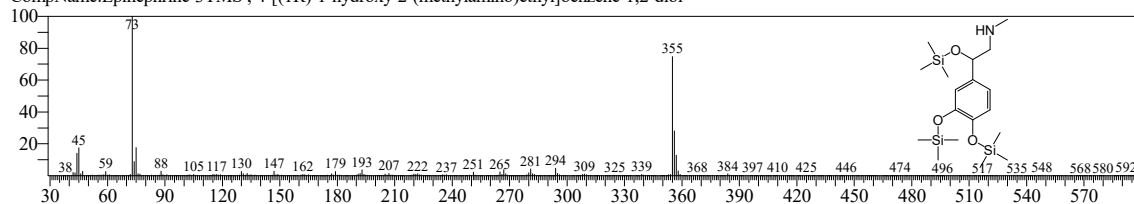

Hit#:5 Entry:402 Library:OA\_TMS\_DB5\_67min\_V3.lib

SI:33 Formula:C<sub>20</sub>H<sub>42</sub>O<sub>4</sub>Si<sub>4</sub> CAS:775-01-9 MolWeight:458 RetIndex:1942

CompName:3,4-Dihydroxymandelic acid-4TMS ; 2-(3,4-dihydroxyphenyl)-2-hydroxyacetic acid

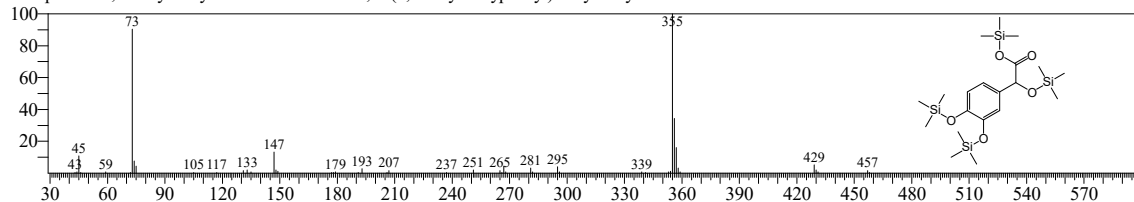

# TNAU

<< Target >>

Line#:20 R.Time:31.900(Scan#:5481) MassPeaks:305

RawMode:Averaged 31.895-31.905(5480-5482) BasePeak:139.10(1082)

BG Mode:Calc. from Peak Group 1 - Event 1 Q3 Scan

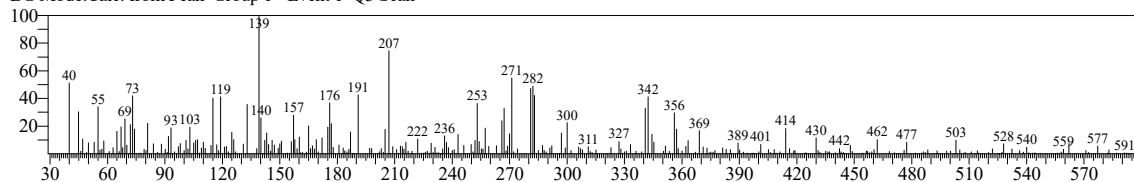

Hit#:1 Entry:328 Library:OA\_TMS\_DB5\_67min\_V3.lib

SI:30 Formula:C<sub>13</sub>H<sub>23</sub>NO<sub>2</sub>Si<sub>2</sub> CAS:150-13-0 MolWeight:281 RetIndex:1845

CompName:4-Aminobenzoic acid-2TMS ; 4-aminobenzoic acid

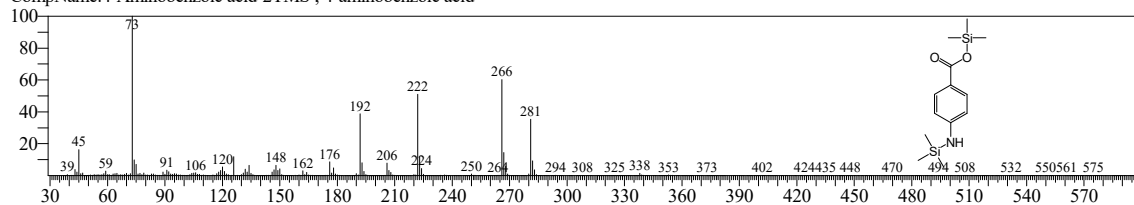

Hit#:2 Entry:438 Library:OA\_TMS\_DB5\_67min\_V3.lib

SI:29 Formula:C<sub>12</sub>H<sub>22</sub>N<sub>2</sub>O<sub>2</sub>Si<sub>2</sub> CAS:104-98-3 MolWeight:282 RetIndex:2014

CompName:Urocanic acid-2TMS ; (E)-3-(1H-imidazol-5-yl)prop-2-enoic acid

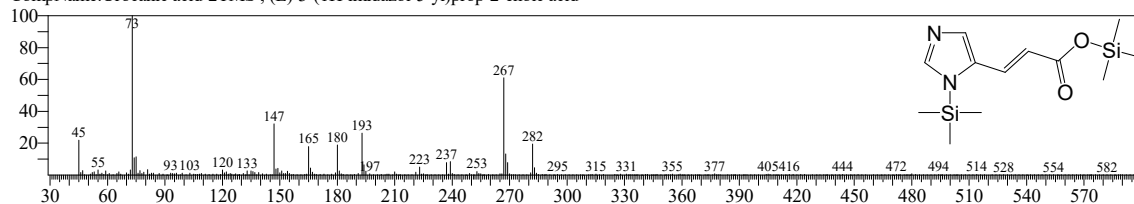

Hit#:3 Entry:291 Library:OA\_TMS\_DB5\_67min\_V3.lib

SI:28 Formula:C<sub>14</sub>H<sub>24</sub>O<sub>4</sub>Si<sub>2</sub> CAS:121-34-6 MolWeight:312 RetIndex:1775

CompName:3-Methoxy-4-hydroxybenzoic acid-2TMS ; 4-hydroxy-3-methoxybenzoic acid

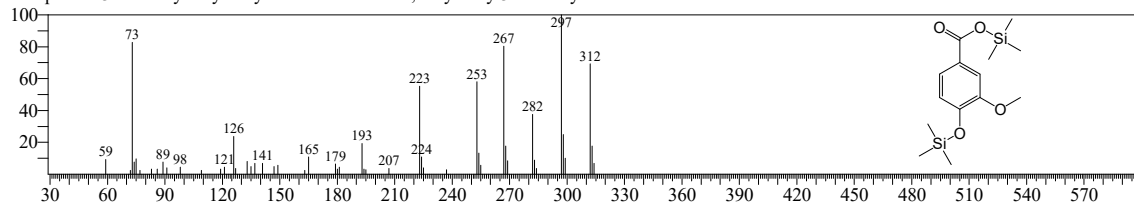

Hit#:4 Entry:539 Library:OA\_TMS\_DB5\_67min\_V3.lib

SI:28 Formula:C<sub>27</sub>H<sub>60</sub>O<sub>3</sub>Si<sub>2</sub> CAS:544-62-7 MolWeight:488 RetIndex:2684

CompName:Batyl alcohol-2TMS ; 3-octadecyloxypropane-1,2-diol

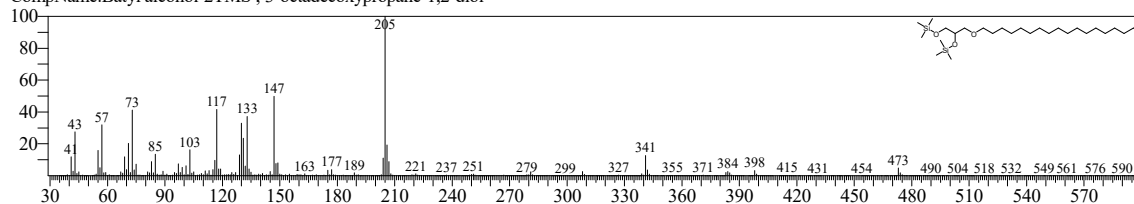

Hit#:5 Entry:211 Library:OA\_TMS\_DB5\_67min\_V3.lib

SI:27 Formula:C<sub>13</sub>H<sub>22</sub>O<sub>3</sub>Si<sub>2</sub> CAS:99-96-7 MolWeight:282 RetIndex:1636

CompName:4-Hydroxybenzoic acid-2TMS ; 4-hydroxybenzoic acid

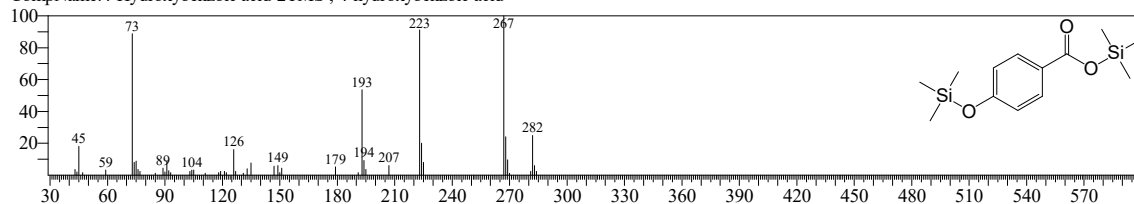

# TNAU

<< Target >>

Line#:21 R.Time:31.950(Scan#:5491) MassPeaks:271

RawMode:Averaged 31.945-31.955(5490-5492) BasePeak:281.00(811)

BG Mode:Calc. from Peak Group 1 - Event 1 Q3 Scan

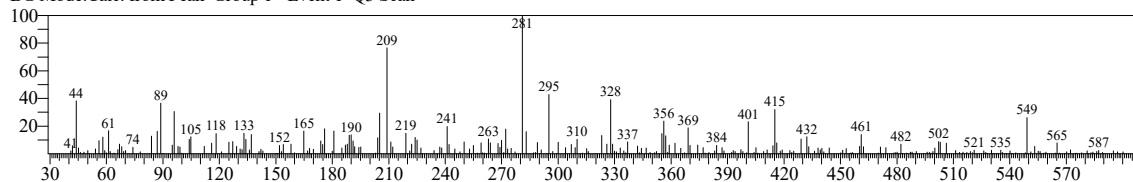

Hit#:1 Entry:402 Library:OA\_TMS\_DB5\_67min\_V3.lib

SI:22 Formula:C20H42O4Si4 CAS:775-01-9 MolWeight:458 RetIndex:1942

CompName:3,4-Dihydroxymandelic acid-4TMS ; 2-(3,4-dihydroxyphenyl)-2-hydroxyacetic acid

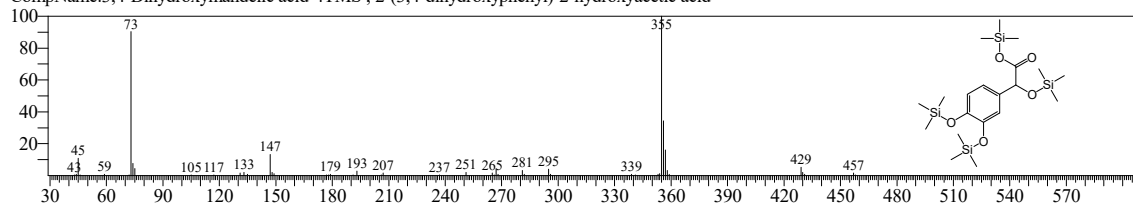

Hit#:2 Entry:530 Library:OA\_TMS\_DB5\_67min\_V3.lib

SI:19 Formula:C23H25N CAS:13042-18-7 MolWeight:315 RetIndex:2545

CompName:Fendiline ; 3,3-diphenyl-N-(1-phenylethyl)propan-1-amine

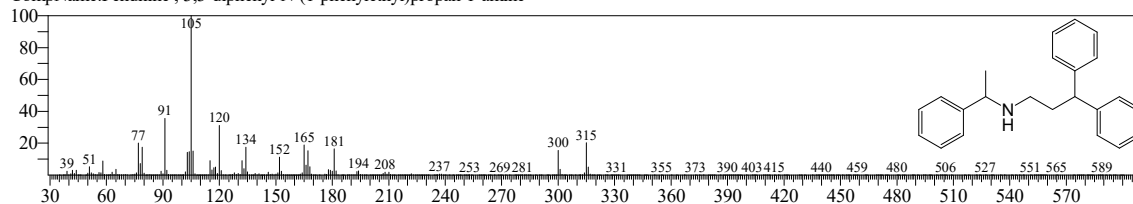

Hit#:3 Entry:276 Library:OA\_TMS\_DB5\_67min\_V3.lib

SI:17 Formula:C18H44O5Si4 CAS:154-17-6 MolWeight:452 RetIndex:1745

CompName:2-Deoxy-glucose-4TMS(1) ; (2S,4S,5S,6S)-6-(hydroxymethyl)oxane-2,4,5-triol

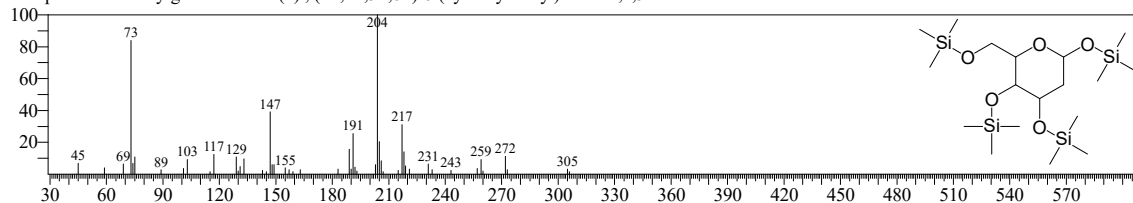

Hit#:4 Entry:539 Library:OA\_TMS\_DB5\_67min\_V3.lib

SI:17 Formula:C27H60O3Si2 CAS:544-62-7 MolWeight:488 RetIndex:2684

CompName:Batyl alcohol-2TMS ; 3-octadecoxypropane-1,2-diol

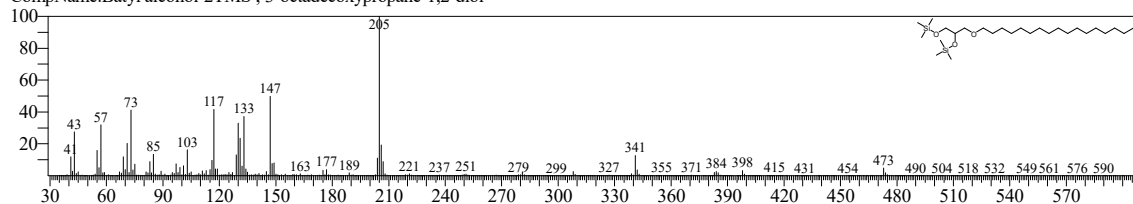

Hit#:5 Entry:308 Library:OA\_TMS\_DB5\_67min\_V3.lib

SI:16 Formula:C19H42O5Si4 CAS:138-59-0 MolWeight:462 RetIndex:1819

CompName:Shikimic acid-4TMS ; 3,4,5-trihydroxycyclohexene-1-carboxylic acid

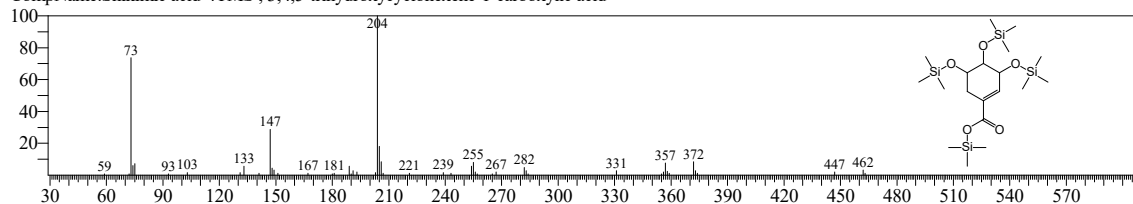

# TNAU

<< Target >>

Line#:22 R.Time:32.525(Scan#:5606) MassPeaks:324

RawMode:Averaged 32.520-32.530(5605-5607) BasePeak:207.00(2145)

BG Mode:Calc. from Peak Group 1 - Event 1 Q3 Scan

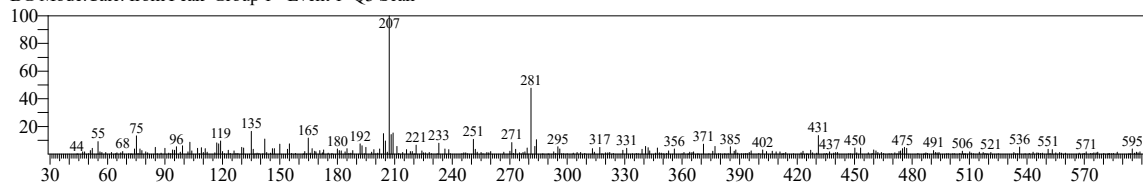

Hit#:1 Entry:539 Library:OA TMS DB5 67min V3.lib

SI:34 Formula:C27H60O3Si2 CAS:544-62-7 MolWeight:488 RetIndex:2684

CompName:Batyl alcohol-2TMS ; 3-octadecoxypropane-1,2-diol

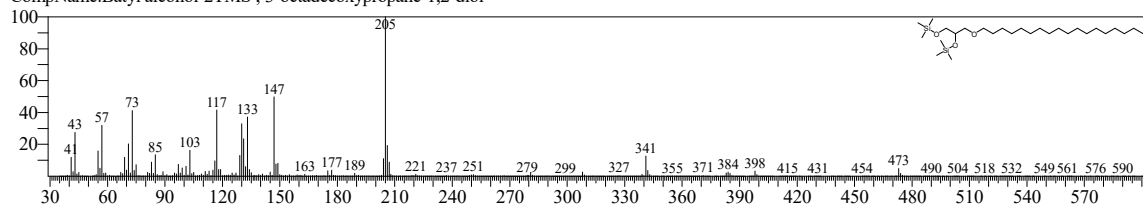

Hit#:2 Entry:219 Library:OA TMS DB5 67min V3.lib

SI:29 Formula:C18H44O5Si4 CAS:10485-94-6 MolWeight:452 RetIndex:1646

CompName:Rhamnose-4TMS(1) ; (2R,3R,4S,5S)-2,3,4,5-tetrahydroxyhexanal

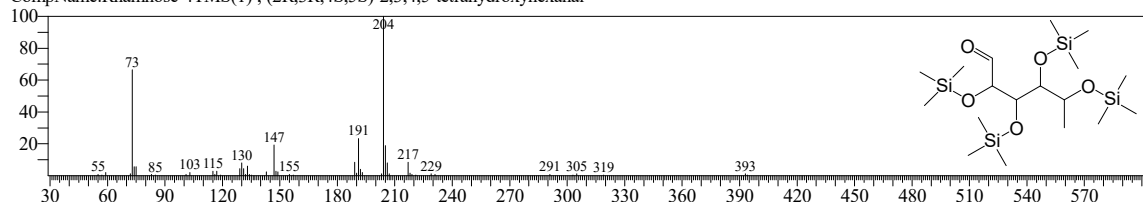

Hit#:3 Entry:437 Library:OA TMS DB5 67min V3.lib

SI:27 Formula:C21H52O6Si5 CAS:50-99-7 MolWeight:540 RetIndex:2002

CompName:Glucose-5TMS(2) ; (3R,4S,5S,6R)-6-(hydroxymethyl)oxane-2,3,4,5-tetrol

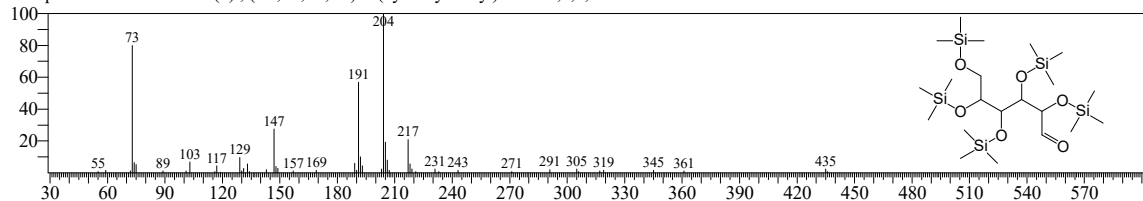

Hit#:4 Entry:252 Library:OA TMS DB5 67min V3.lib

SI:27 Formula:C18H44O5Si4 CAS:3615-37-0 MolWeight:452 RetIndex:1695

CompName:Fucose-4TMS(1) ; (2S,3R,4S,5R,6R)-6-methyloxane-2,3,4,5-tetrol

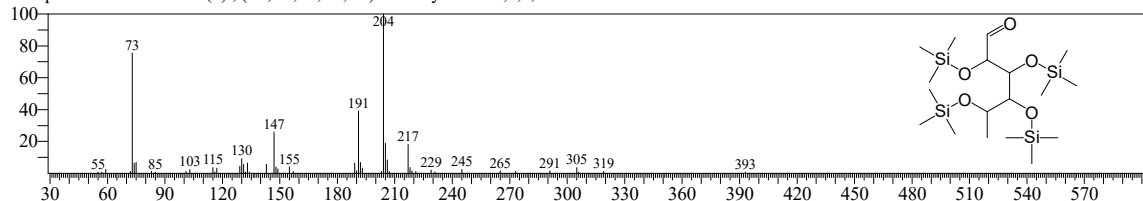

Hit#:5 Entry:288 Library:OA TMS DB5 67min V3.lib

SI:27 Formula:C21H52O6Si5 CAS:3458-28-4 MolWeight:540 RetIndex:1771

CompName:Mannose-5TMS(1) ; (3S,4S,5S,6R)-6-(hydroxymethyl)oxane-2,3,4,5-tetrol

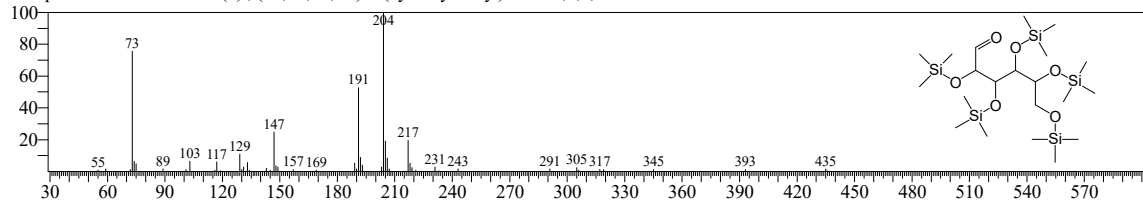

Supplement: Supplementary file 57 [file supplementary]
