# Supplementary material for: Comparative Metabolomics Profiling Reveals Key Metabolites and Associated Pathways Regulating Tuber Dormancy in White Yam (<em>Dioscorea rotundata</em>)
Source: Preprints.org preprint supplement (doi:10.20944/preprints202303.0378.v1), 2023-03-21

# TNAU

## Sample Information

Analyzed by : Admin  
 Analyzed : 01-Sep-22 9:05:34 PM  
 Sample Type : Unknown  
 Level # : 1  
 Sample Name : Sample  
 Sample ID : 2-1  
 IS Amount : [1]=1  
 Sample Amount : 1  
 Dilution Factor : 1  
 Vial # : 3  
 Injection Volume : 2.00  
 Data File : D:\GCMS-8040NX\Sep 2022\Users\01.09.2022\01092022005.qgd  
 Org Data File : D:\GCMS-8040NX\Sep 2022\Users\01.09.2022\01092022005.qgd  
 Method File : D:\GCMS-8040NX\Sep 2022\Method\Scan\_methodfile.qgm  
 Org Method File : D:\GCMS-8040NX\Sep 2022\Method\Scan\_methodfile.qgm  
 Report File :  
 Tuning File : D:\GCMS-8040NX\Aug 2022\Tuning Data\TUNING 25082022.qgt  
 Modified by : Admin  
 Modified : 05-Sep-22 10:56:52 AM

Chromatogram Sample D:\GCMS-8040NX\Sep 2022\Users\01.09.2022\01092022005.qgd

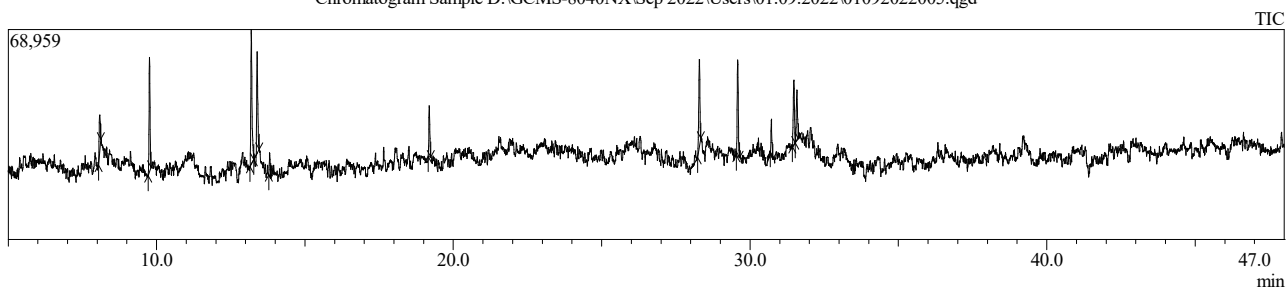

## Peak Report TIC

| Peak# | R.Time | Area   | Area%  | Height | Height% | A/H  | Similarity | Name                                    |
|-------|--------|--------|--------|--------|---------|------|------------|-----------------------------------------|
| 1     | 8.084  | 35511  | 5.29   | 12346  | 4.72    | 2.88 | 83         | 1-Butanol, 3-methyl-, acetate           |
| 2     | 9.763  | 87726  | 13.06  | 37556  | 14.35   | 2.34 | 96         | Pentasiloxane, dodecamethyl-            |
| 3     | 13.191 | 124532 | 18.54  | 44217  | 16.90   | 2.82 | 54         | Methyl cis-13,16-Docosadienate          |
| 4     | 13.388 | 78792  | 11.73  | 33254  | 12.71   | 2.37 | 54         | Methyl cis-13,16-Docosadienate          |
| 5     | 13.810 | 16907  | 2.52   | 7810   | 2.98    | 2.16 | 79         | Trisiloxane, octamethyl-                |
| 6     | 19.190 | 37806  | 5.63   | 16809  | 6.42    | 2.25 | 93         | 2,4-Di-tert-butylphenoxytrimethylsilane |
| 7     | 28.293 | 75817  | 11.29  | 28501  | 10.89   | 2.66 | 95         | n-Hexadecanoic acid                     |
| 8     | 29.584 | 78225  | 11.64  | 31599  | 12.08   | 2.48 | 89         | Scyllo-Inositol, 6TMS                   |
| 9     | 30.720 | 25876  | 3.85   | 11761  | 4.49    | 2.20 | 91         | Myo-Inositol, 6TMS                      |
| 10    | 31.479 | 63989  | 9.53   | 21266  | 8.13    | 3.01 | 93         | 9,12-Octadecadienoic acid (Z,Z)-        |
| 11    | 31.582 | 46615  | 6.94   | 16562  | 6.33    | 2.81 | 89         | cis,cis,cis-7,10,13-Hexadecatrienal     |
|       |        | 671796 | 100.00 | 261681 | 100.00  |      |            |                                         |

Library

# TNAU

<< Target >>

Line#:1 R.Time:8.085(Scan#:618) MassPeaks:330

RawMode:Averaged 8.080-8.090(617-619) BasePeak:43.05(2390)

BG Mode:Calc. from Peak Group 1 - Event 1 Q3 Scan

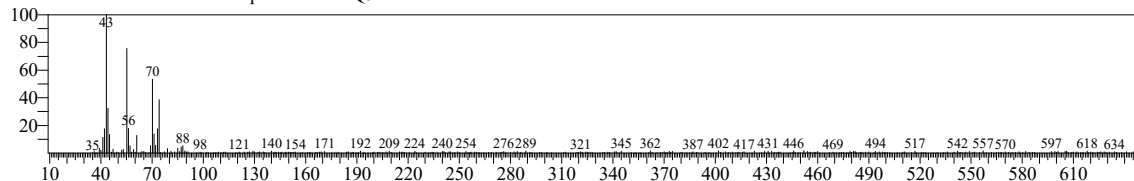

Hit#:1 Entry:6783 Library:NIST20R.lib

SI:83 Formula:C7H14O2 CAS:123-92-2 MolWeight:130 RetIndex:820

CompName:1-Butanol, 3-methyl-, acetate \$\$ Isopentyl alcohol, acetate \$\$ Acetic acid, 3-methylbutyl ester \$\$ Banana oil \$\$ Isoamyl acetate \$\$ Isoamyl etha

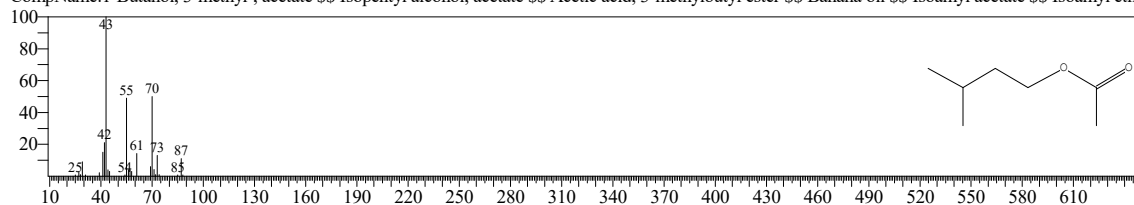

Hit#:2 Entry:6819 Library:NIST20R.lib

SI:81 Formula:C7H14O2 CAS:624-41-9 MolWeight:130 RetIndex:820

CompName:1-Butanol, 2-methyl-, acetate \$\$ 2-Methyl-1-butyl acetate \$\$ 2-Methylbutyl acetate \$\$ Acetic acid 2-methylbutyl ester \$\$ 2-Methylbutyl acetate :

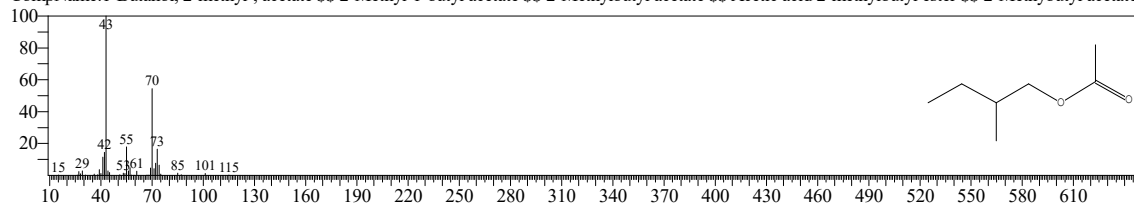

Hit#:3 Entry:8685 Library:NIST20M1.lib

SI:80 Formula:C7H14O2 CAS:628-63-7 MolWeight:130 RetIndex:884

CompName:Acetic acid, pentyl ester \$\$ n-Amyl acetate \$\$ n-Pentyl acetate \$\$ Amyl acetate \$\$ Birrenoel \$\$ Pentyl acetate \$\$ Acetic acid, amyl ester \$\$ Ar

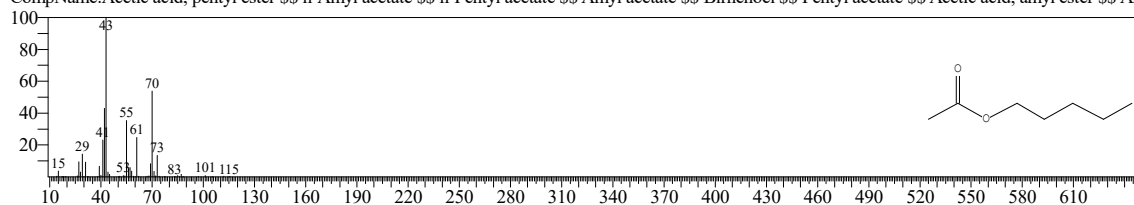

Hit#:4 Entry:4411 Library:NIST20R.lib

SI:78 Formula:C6H12O2 CAS:110-45-2 MolWeight:116 RetIndex:818

CompName:1-Butanol, 3-methyl-, formate \$\$ Isopentyl alcohol, formate \$\$ Isoamyl formate \$\$ Isoamyl methanoate \$\$ Isopentyl formate \$\$ 3-Methylbutyl

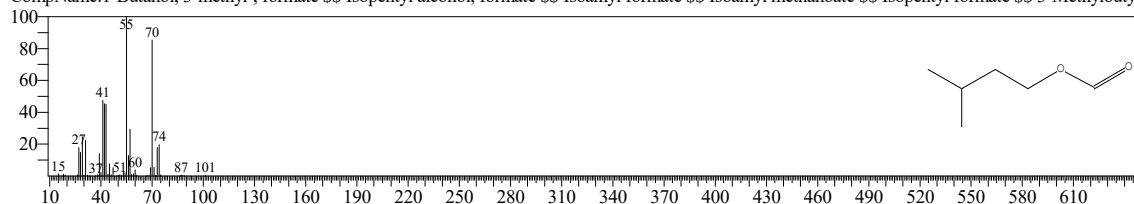

Hit#:5 Entry:5029 Library:NIST20M1.lib

SI:78 Formula:C7H16O CAS:6570-87-2 MolWeight:116 RetIndex:832

CompName:1-Pentanol, 3,4-dimethyl- \$\$ 3,4-Dimethyl-1-pentanol \$\$ Pentanol, 3,4-dimethyl

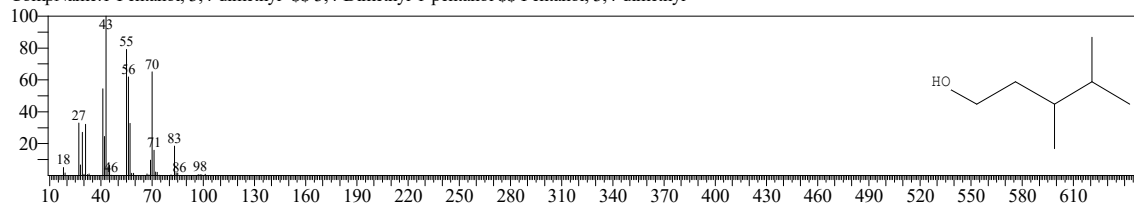

# TNAU

<< Target >>

Line#:2 R.Time:9.765(Scan#:954) MassPeaks:310

RawMode:Averaged 9.760-9.770(953-955) BasePeak:281.05(9535)

BG Mode:Calc. from Peak Group 1 - Event 1 Q3 Scan

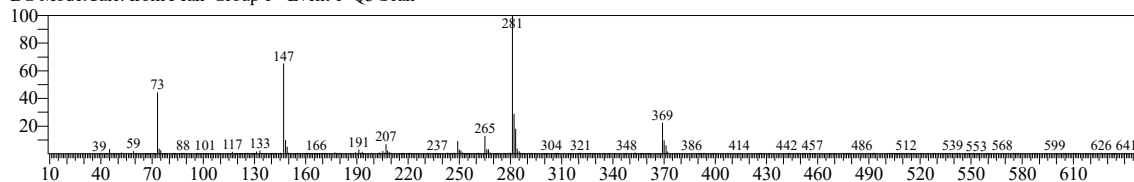

Hit#:1 Entry:40975 Library:NIST20R.lib

SI:96 Formula:C<sub>12</sub>H<sub>36</sub>O<sub>4</sub>Si<sub>5</sub> CAS:141-63-9 MolWeight:384 RetIndex:1068

CompName:Pentasiloxane, dodecamethyl- \$\$ Dodecamethylpentasiloxane \$\$ 1,1,1,3,3,5,5,7,7,9,9,9-Dodecamethylpentasiloxane #

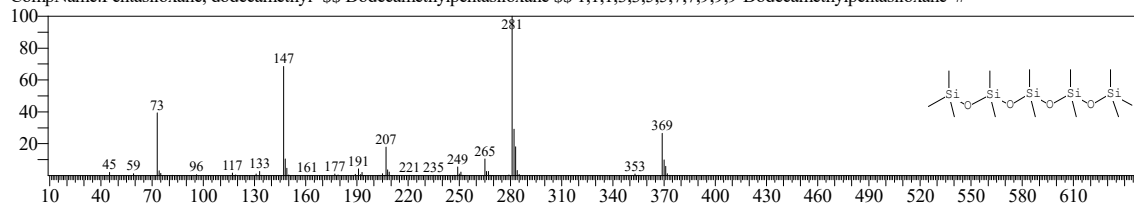

Hit#:2 Entry:249272 Library:NIST20M1.lib

SI:85 Formula:C<sub>12</sub>H<sub>36</sub>O<sub>4</sub>Si<sub>5</sub> CAS:3555-47-3 MolWeight:384 RetIndex:1068

CompName:Trisiloxane, 1,1,1,5,5,5-hexamethyl-3,3-bis[(trimethylsilyl)oxy]- \$\$ Tetrakis(trimethylsiloxy)silane \$\$ Trisiloxane, 1,1,1,5,5,5-hexamethyl-3,3-b

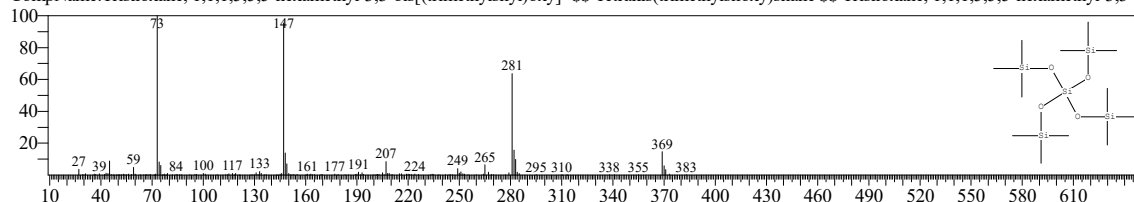

Hit#:3 Entry:27848 Library:NIST20M2.lib

SI:83 Formula:C<sub>18</sub>H<sub>48</sub>O<sub>4</sub>Si<sub>5</sub> CAS:0-00-0 MolWeight:468 RetIndex:1495

CompName:1,3,5,7,9-Pentasiloxane, 1,1,3,3,5,5,7,7,9,9-decamethyl-1,9-di(tert.butyl)-

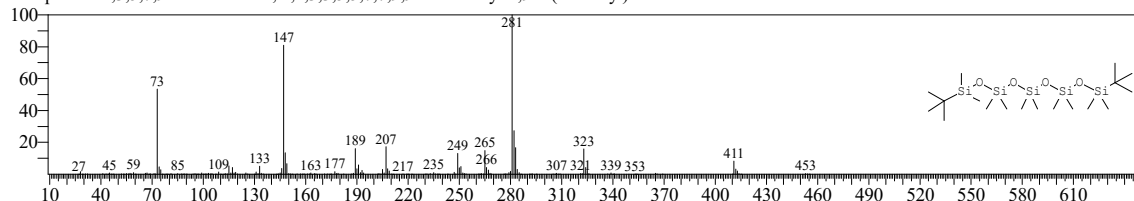

Hit#:4 Entry:249271 Library:NIST20M1.lib

SI:80 Formula:C<sub>12</sub>H<sub>36</sub>O<sub>4</sub>Si<sub>5</sub> CAS:38146-99-5 MolWeight:384 RetIndex:1068

CompName:1,1,1,3,5,5,7,7,7-Nonamethyl-3-(trimethylsiloxy)tetrasiloxane \$\$ 1,1,1,3,3,5,7,7,7-Nonamethyl-5-[(trimethylsilyl)oxy]tetrasiloxane #

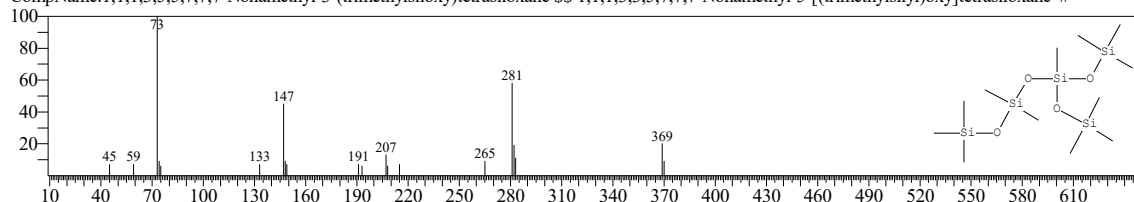

Hit#:5 Entry:158097 Library:NIST20M1.lib

SI:78 Formula:C<sub>14</sub>H<sub>24</sub>O<sub>3</sub>Si<sub>2</sub> CAS:0-00-0 MolWeight:296 RetIndex:1625

CompName:2,6-Dihydroxyacetophenone, 2TMS derivative \$\$ 2',6'-Dihydroxyacetophenone, bis(trimethylsilyl) ether

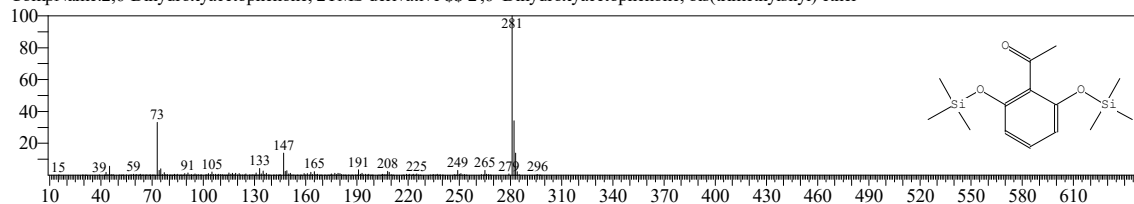

# TNAU

<< Target >>

Line#3 R.Time:13.190(Scan#:1639) MassPeaks:358

RawMode:Averaged 13.185-13.195(1638-1640) BasePeak:155.10(6748)

BG Mode:Calc. from Peak Group 1 - Event 1 Q3 Scan

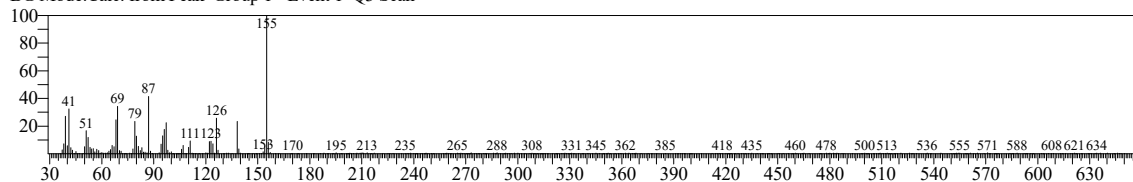

Hit#:1 Entry:34 Library:FA\_ME\_SP2560\_EI\_V3.lib

SI:54 Formula:C23H42O2 CAS:7370-49-2 MolWeight:350 RetIndex:3169

CompName:Methyl cis-13,16-Docosadienate ; (13Z,16E)-docosa-13,16-dienoic acid

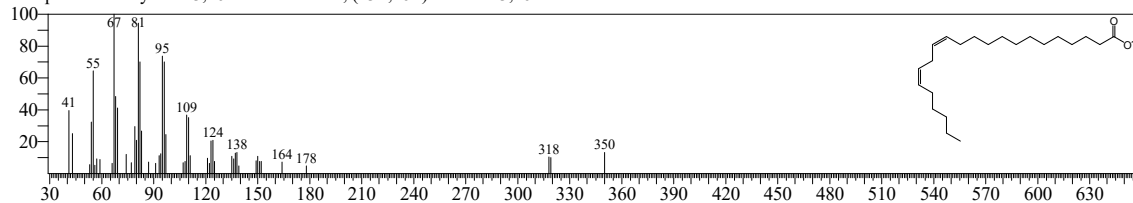

Hit#:2 Entry:21 Library:FA\_ME\_SP2560\_EI\_V3.lib

SI:52 Formula:C19H34O2 CAS:60-33-3 MolWeight:294 RetIndex:2775

CompName:Methyl linoleate ; Octadeca-9,12-dienoic acid

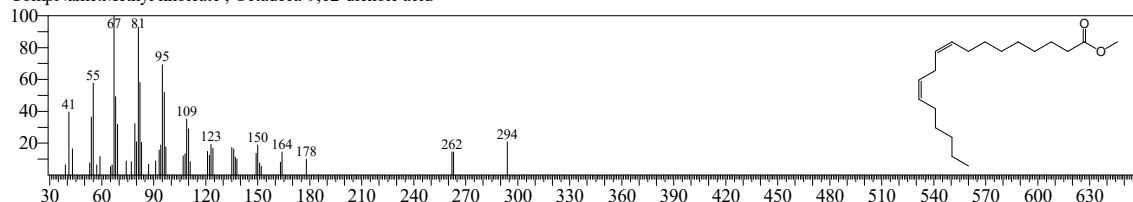

Hit#:3 Entry:20 Library:FA\_ME\_SP2560\_EI\_V3.lib

SI:52 Formula:C19H34O2 CAS:506-21-8 MolWeight:294 RetIndex:2727

CompName:Methyl linolelaidate ; (9E,12E)-octadeca-9,12-dienoic acid

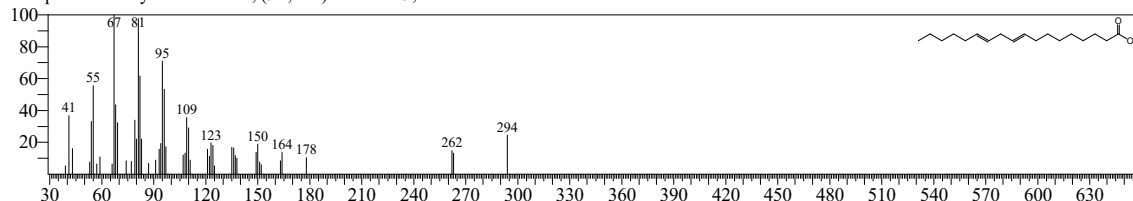

Hit#:4 Entry:27 Library:FA\_ME\_SP2560\_EI\_V3.lib

SI:52 Formula:C21H38O2 CAS:2091-39-6 MolWeight:322 RetIndex:2973

CompName:Methyl cis-11,14-Icosadienoate ; Icosa-11,14-dienoic acid

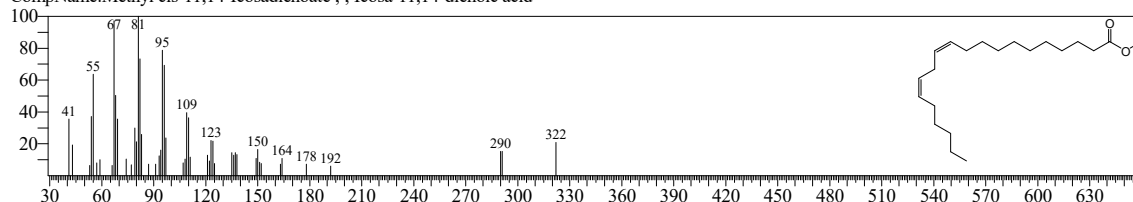

Hit#:5 Entry:11 Library:FA\_ME\_SP2560\_EI\_V3.lib

SI:52 Formula:C16H30O2 CAS:84743-29-3 MolWeight:254 RetIndex:2388

CompName:Methyl cis-10-pentadecenoate ; (Z)-pentadec-10-enoic acid

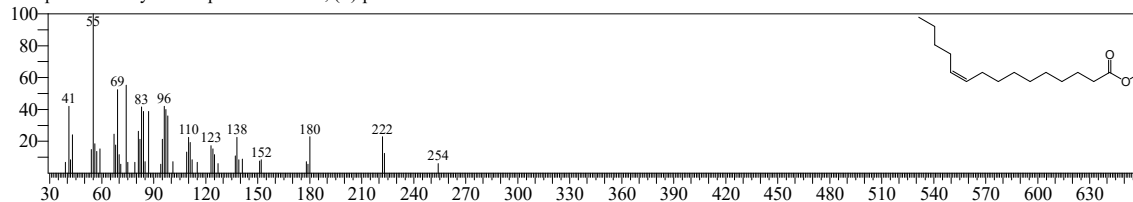

# TNAU

<< Target >>

Line#:4 R.Time:13.390(Scan#:1679) MassPeaks:297

RawMode:Averaged 13.385-13.395(1678-1680) BasePeak:155.10(5593)

BG Mode:Calc. from Peak Group 1 - Event 1 Q3 Scan

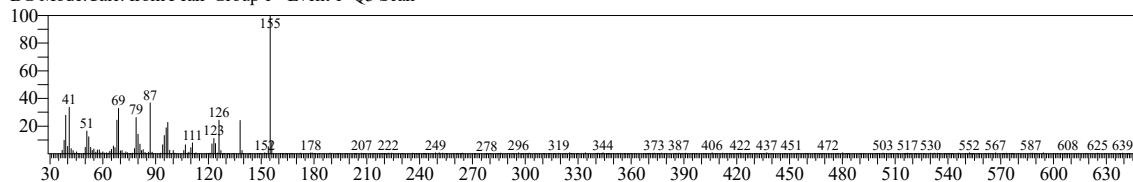

Hit#:1 Entry:34 Library:FA\_ME\_SP2560\_EI\_V3.lib

SI:54 Formula:C23H42O2 CAS:7370-49-2 MolWeight:350 RetIndex:3169

CompName:Methyl cis-13,16-Docosadienate ; (13Z,16E)-docosa-13,16-dienoic acid

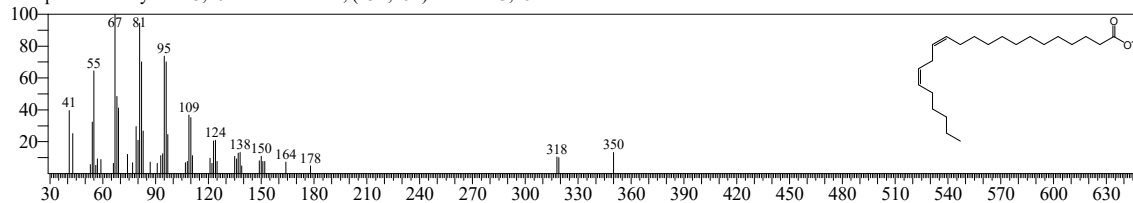

Hit#:2 Entry:21 Library:FA\_ME\_SP2560\_EI\_V3.lib

SI:53 Formula:C19H34O2 CAS:60-33-3 MolWeight:294 RetIndex:2775

CompName:Methyl linoleate ; Octadeca-9,12-dienoic acid

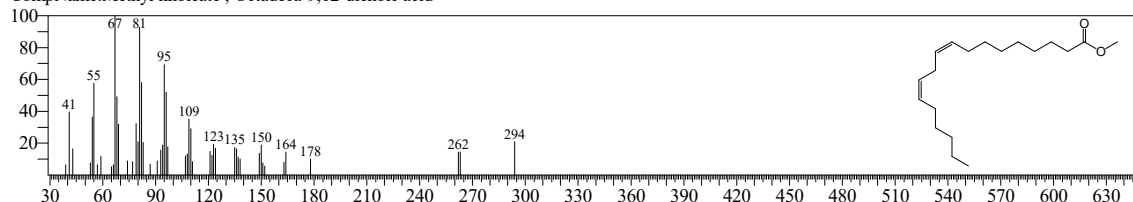

Hit#:3 Entry:20 Library:FA\_ME\_SP2560\_EI\_V3.lib

SI:52 Formula:C19H34O2 CAS:506-21-8 MolWeight:294 RetIndex:2727

CompName:Methyl linolelaidate ; (9E,12E)-octadeca-9,12-dienoic acid

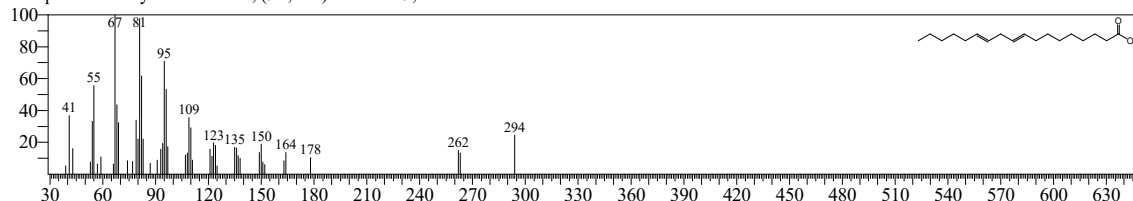

Hit#:4 Entry:27 Library:FA\_ME\_SP2560\_EI\_V3.lib

SI:52 Formula:C21H38O2 CAS:2091-39-6 MolWeight:322 RetIndex:2973

CompName:Methyl cis-11,14-Icosadienoate ; Icosa-11,14-dienoic acid

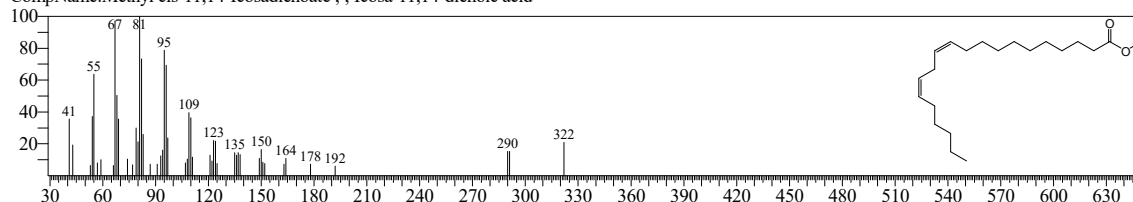

Hit#:5 Entry:11 Library:FA\_ME\_SP2560\_EI\_V3.lib

SI:51 Formula:C16H30O2 CAS:84743-29-3 MolWeight:254 RetIndex:2388

CompName:Methyl cis-10-pentadecenoate ; (Z)-pentadec-10-enoic acid

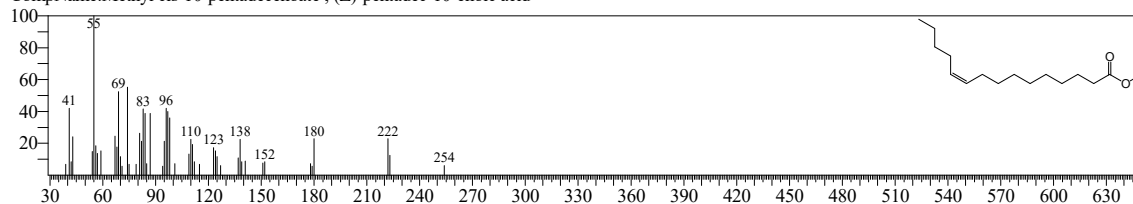

# TNAU

<< Target >>

Line#:5 R.Time:13.810(Scan#:1763) MassPeaks:356

RawMode:Averaged 13.805-13.815(1762-1764) BasePeak:221.05(2336)

BG Mode:Calc. from Peak Group 1 - Event 1 Q3 Scan

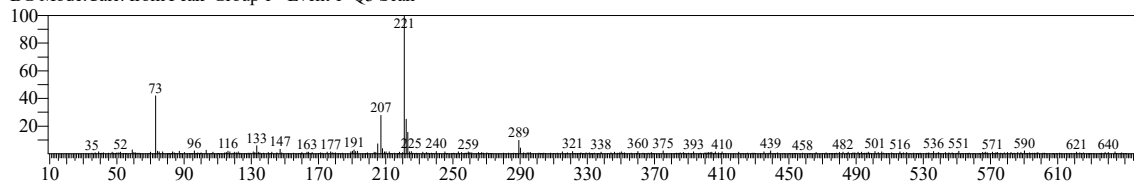

Hit#:1 Entry:28950 Library:NIST20R.lib

SI:79 Formula:C8H24O2Si3 CAS:107-51-7 MolWeight:236 RetIndex:698

CompName:Trisiloxane, octamethyl- \$\$(CH\_3)\_8Si\_3O\_2\$\$ Octamethyltrisiloxane \$\$(CH\_3)\_8Si\_3O\_2\$\$ Silane, dimethylbis(trimethylsiloxy)- \$\$(CH\_3)\_2Si(CH\_2CH\_2Si(CH\_3)\_3)\_2\$\$

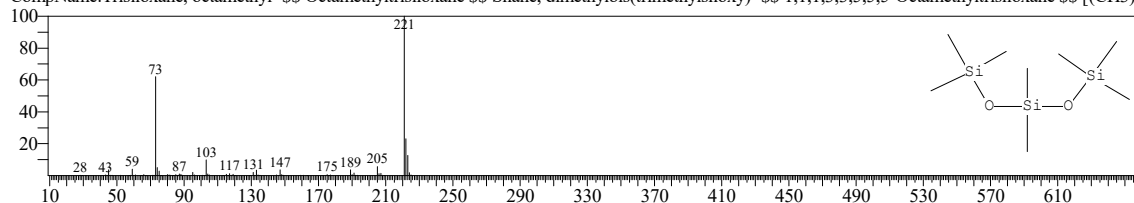

Hit#:2 Entry:186590 Library:NIST20M1.lib

SI:74 Formula:C14H36O2Si3 CAS:0-00-0 MolWeight:320 RetIndex:1126

CompName:1,3,5-Trisiloxane, 1,1,3,3,5,5-hexamethyl-1,5-di(tert.butyl)-

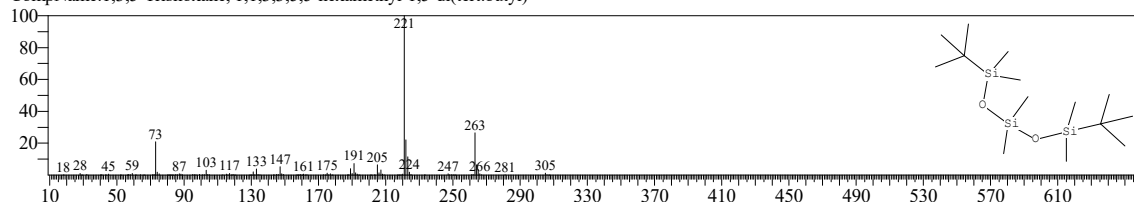

Hit#:3 Entry:33791 Library:NIST20R.lib

SI:74 Formula:C9H27BO3Si3 CAS:4325-85-3 MolWeight:278 RetIndex:0

CompName:Boric acid, 3TMS derivative \$\$(CH\_3)\_3SiO)\_3B(OH)\_3\$\$ Tris(trimethylsilyl)borate \$\$(CH\_3)\_3SiO)\_3B(OH)\_3\$\$ Silanol, trimethyl-, triester with boric acid (H3BO3) \$\$(CH\_3)\_3SiO)\_3B(OH)\_3\$\$ Borane, tris(trimethylsiloxy)

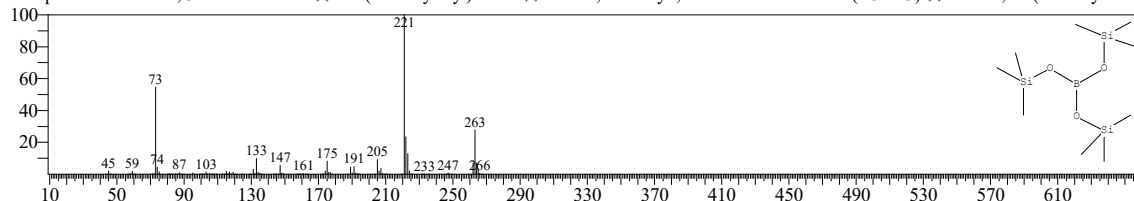

Hit#:4 Entry:186586 Library:NIST20M1.lib

SI:73 Formula:C14H32O2SSi2 CAS:82112-29-6 MolWeight:320 RetIndex:1482

CompName:Thioglycolic acid, S-(tert-butyltrimethylsilyl)-, tert-butyltrimethylsilyl ester

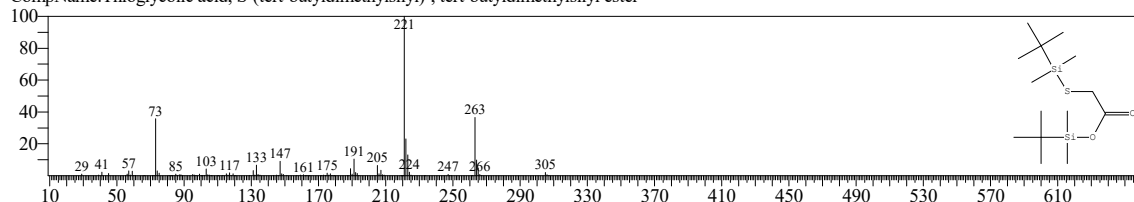

Hit#:5 Entry:3 Library:OA.TMS.DB5.67min.V3.lib

SI:59 Formula:C9H27BO3Si3 CAS:10043-35-3 MolWeight:278 RetIndex:992

CompName:Boric acid-3TMS ; boric acid

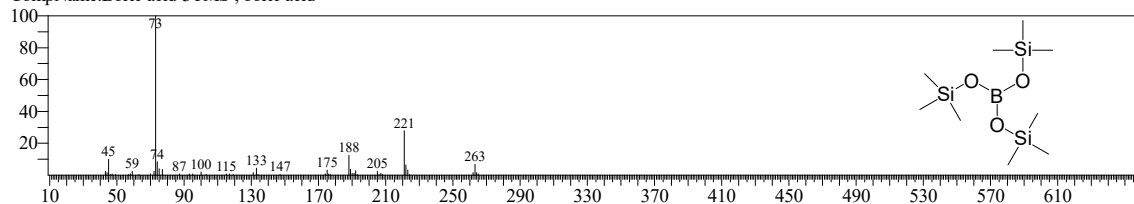

# TNAU

<< Target >>

Line#6 R.Time:19.190(Scan#:2839) MassPeaks:317

RawMode:Averaged 19.185-19.195(2838-2840) BasePeak:263.20(7285)

BG Mode:Calc. from Peak Group 1 - Event 1 Q3 Scan

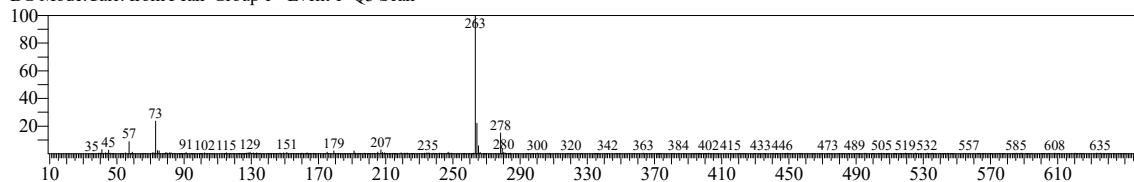

Hit#1 Entry:33874 Library:NIST20R.lib

SI:93 Formula:C<sub>17</sub>H<sub>30</sub>OSi CAS:53925-65-8 MolWeight:278 RetIndex:1632

CompName:2,4-Di-tert-butylphenoxytrimethylsilane \$\$\$\$ Benzene, 2,4-bis(1,1-dimethylethyl)-1-[(trimethylsilyl)oxy]- \$\$\$\$ Silane, [2,4-bis(1,1-dimethylethyl)ph

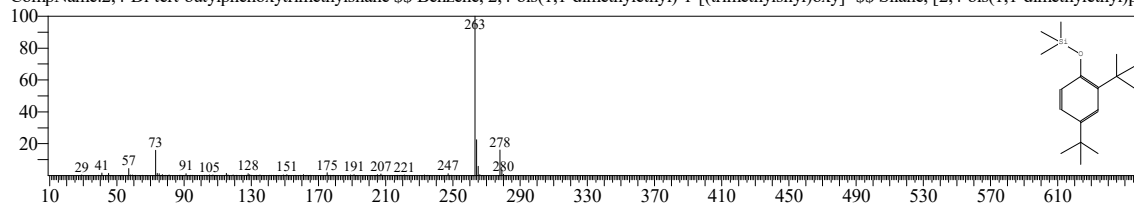

Hit#2 Entry:33871 Library:NIST20R.lib

SI:85 Formula:C<sub>17</sub>H<sub>30</sub>OSi CAS:10416-73-6 MolWeight:278 RetIndex:1632

CompName:2,6-Bis(tert-butyl)phenol, TMS derivative \$\$\$\$ Trimethyl(2,6 di-tert-butylphenoxy)silane \$\$\$\$ (2,6-Di-tert-butylphenoxy)(trimethyl)silane #

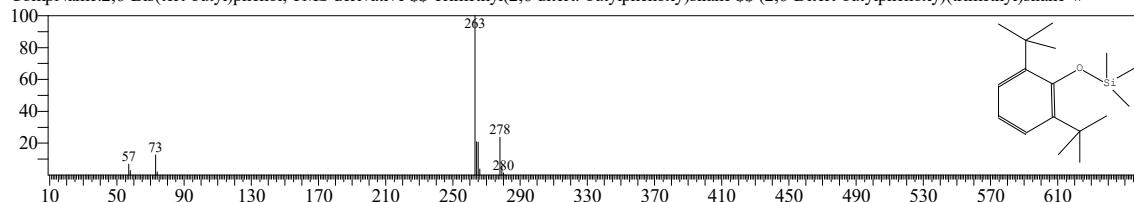

Hit#3 Entry:136557 Library:NIST20M1.lib

SI:84 Formula:C<sub>12</sub>H<sub>22</sub>N<sub>4</sub>Si<sub>2</sub> CAS:0-00-0 MolWeight:278 RetIndex:1703

CompName:3-Deazaadenine, 2TMS \$\$\$\$ 3-Deazaadenine, N,N'-bis-TMS \$\$\$\$ 1H-Imidazo[4,5-c]pyridin-4-amine, N,N'-bis-TMS

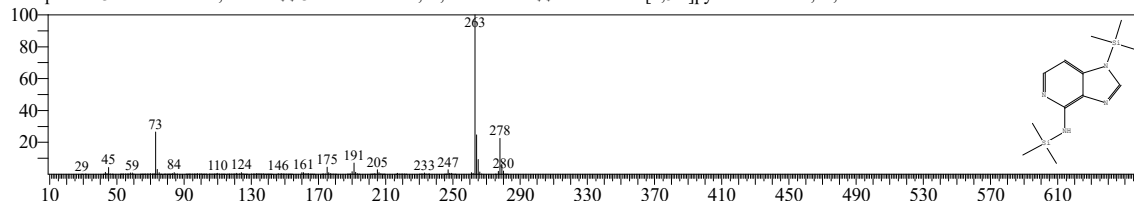

Hit#4 Entry:136556 Library:NIST20M1.lib

SI:80 Formula:C<sub>12</sub>H<sub>22</sub>N<sub>4</sub>Si<sub>2</sub> CAS:0-00-0 MolWeight:278 RetIndex:1606

CompName:1H,1'H-2,2'-Biimidazole, 2TMS \$\$\$\$ 1H,1'H-2,2'-Biimidazole, N,N'-bis-TMS \$\$\$\$ 1H,1'H-[2,2']Biimidazolyl, 2TMS \$\$\$\$ 2,2'-Bi-1H-imidazole, 2TMS

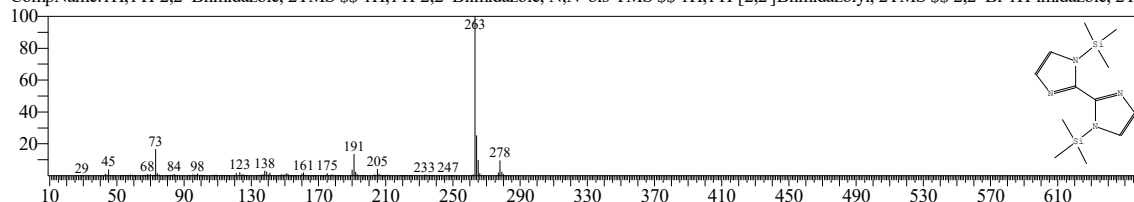

Hit#5 Entry:137020 Library:NIST20M1.lib

SI:79 Formula:C<sub>15</sub>H<sub>22</sub>O<sub>3</sub>Si CAS:0-00-0 MolWeight:278 RetIndex:1736

CompName:6-Methoxy-2,2-dimethyl-2,3-dihydro-4H-chromen-4-one, TMS \$\$\$\$ 6-Methoxy-2,2-dimethyl-chroman-4-one, O-trimethylsilyl- \$\$\$\$ 4H-1-Benzopy

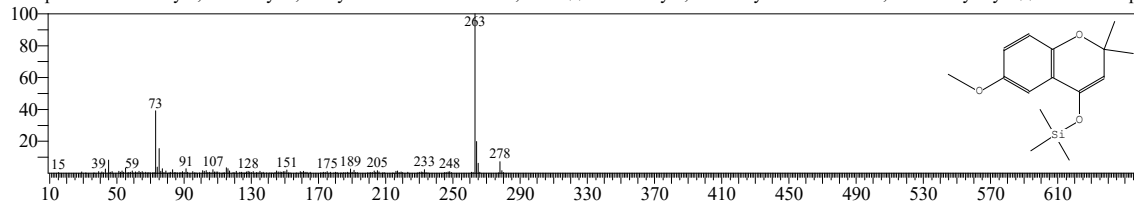

# TNAU

<< Target >>

Line#:7 R.Time:28.295(Scan#:4660) MassPeaks:356

RawMode:Averaged 28.290-28.300(4659-4661) BasePeak:73.05(2418)

BG Mode:Calc. from Peak Group 1 - Event 1 Q3 Scan

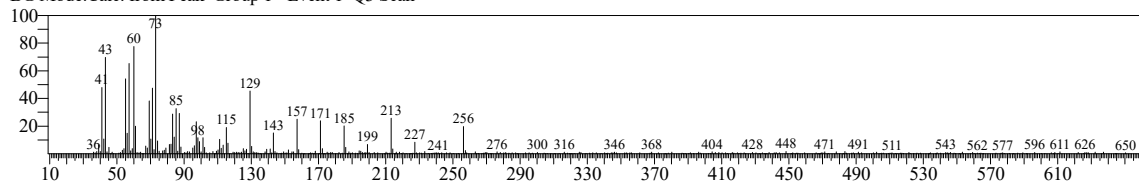

Hit#:1 Entry:31600 Library:NIST20R.lib

SI:95 Formula:C16H32O2 CAS:57-10-3 MolWeight:256 RetIndex:1968

CompName:n-Hexadecanoic acid \$ Hexadecanoic acid \$ n-Hexadecic acid \$ Palmitic acid \$ Pentadecanecarboxylic acid \$ 1-Pentadecanecarboxylic

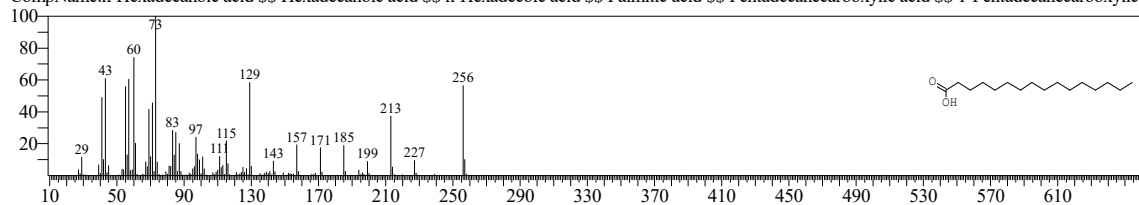

Hit#:2 Entry:29890 Library:NIST20R.lib

SI:91 Formula:C15H30O2 CAS:1002-84-2 MolWeight:242 RetIndex:1869

CompName:Pentadecanoic acid \$ Pentadecylic acid \$ n-Pentadecanoic acid \$ n-Pentadecylic acid

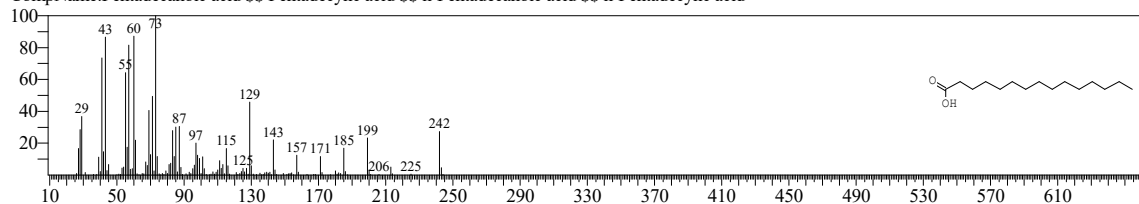

Hit#:3 Entry:44286 Library:NIST20M2.lib

SI:91 Formula:C38H68O8 CAS:28474-90-0 MolWeight:652 RetIndex:4765

CompName:l-(+)-Ascorbic acid 2,6-dihexadecanoate

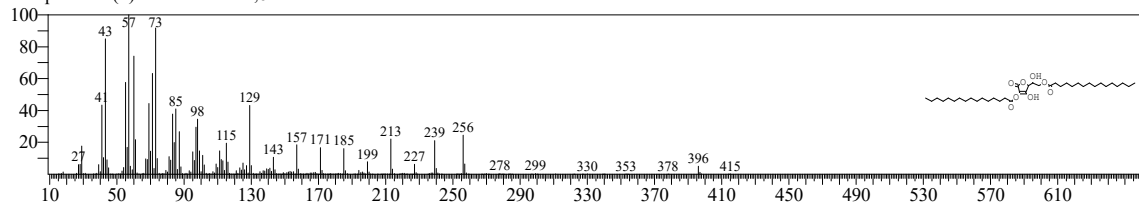

Hit#:4 Entry:25643 Library:NIST20R.lib

SI:90 Formula:C13H26O2 CAS:638-53-9 MolWeight:214 RetIndex:1670

CompName:Tridecanoic acid \$ n-Tridecanoic acid \$ n-Tridecoic acid \$ Tridecylic acid

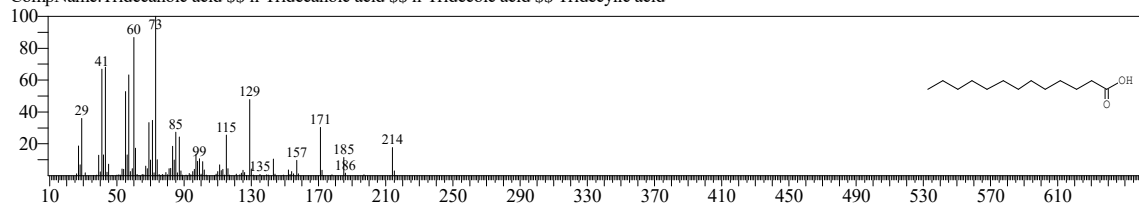

Hit#:5 Entry:81713 Library:NIST20M1.lib

SI:90 Formula:C14H28O2 CAS:544-63-8 MolWeight:228 RetIndex:1769

CompName:Tetradecanoic acid \$ Myristic acid \$ n-Tetradecanoic acid \$ n-Tetradecic acid \$ Neo-Fat 14 \$ Univol U 316S \$ 1-Tridecanecarboxylic ;

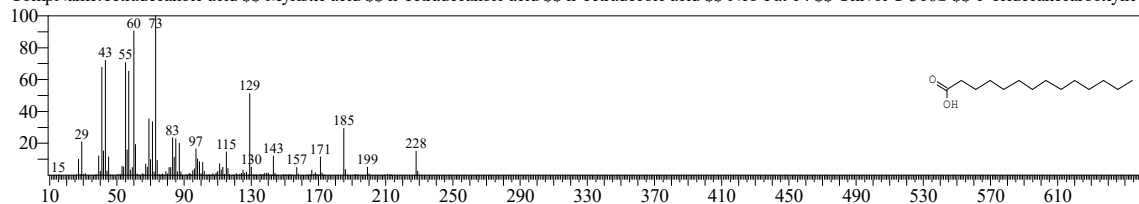



# TNAU

<< Target >>

Line#8 R.Time:29.585(Scan#:4918) MassPeaks:439

RawMode:Averaged 29.580-29.590(4917-4919) BasePeak:318.15(3945)

BG Mode:Calc. from Peak Group 1 - Event 1 Q3 Scan

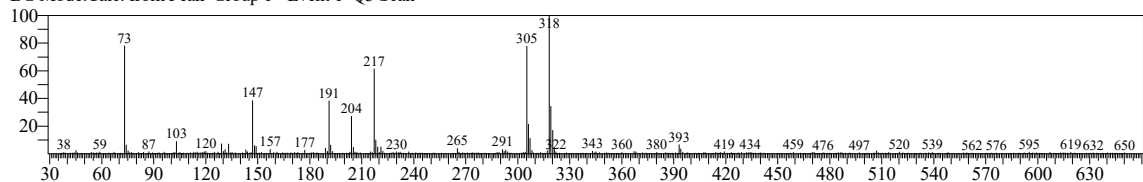

Hit#1 Entry:43144 Library:NIST20M2.lib

SI:89 Formula:C<sub>24</sub>H<sub>60</sub>O<sub>6</sub>Si<sub>6</sub> CAS:14251-18-4 MolWeight:612 RetIndex:2194

CompName:Scyllo-Inositol, 6TMS \$\$ Inositol, 1,2,3,4,5,6-hexakis-O-(trimethylsilyl)-, scyllo- \$\$ Trimethyl((2,3,4,5,6-pentakis[(trimethylsilyl)oxy]cyclohex

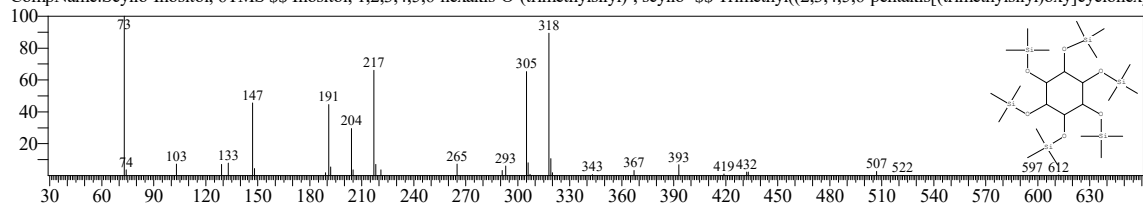

Hit#2 Entry:43552 Library:NIST20R.lib

SI:88 Formula:C<sub>24</sub>H<sub>60</sub>O<sub>6</sub>Si<sub>6</sub> CAS:2582-79-8 MolWeight:612 RetIndex:2194

CompName:Myo-Inositol, 6TMS \$\$ myo-Inositol, 1,2,3,4,5,6-hexakis-O-(trimethylsilyl)- \$\$ Inositol, 1,2,3,4,5,6-hexakis-O-(trimethylsilyl)-, myo- \$\$ Trime

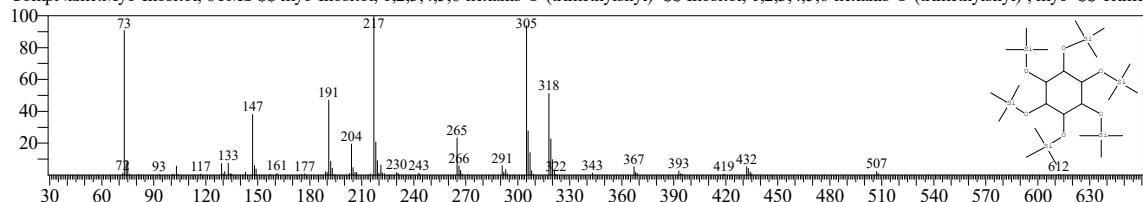

Hit#3 Entry:465 Library:OA\_TMS\_DB5\_67min\_V3.lib

SI:87 Formula:C<sub>24</sub>H<sub>60</sub>O<sub>6</sub>Si<sub>6</sub> CAS:87-89-8 MolWeight:612 RetIndex:2132

CompName:Inositol-6TMS(2) ; cyclohexane-1,2,3,4,5,6-hexol

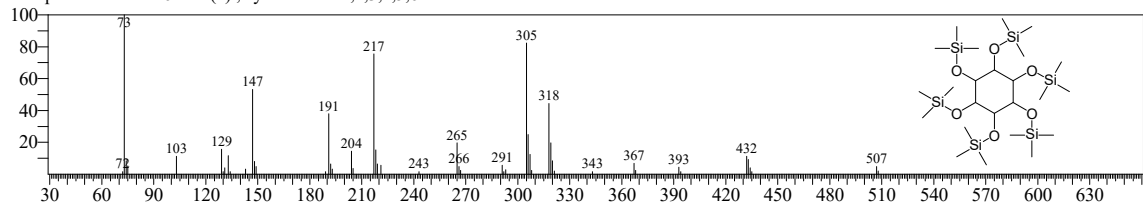

Hit#4 Entry:43146 Library:NIST20M2.lib

SI:81 Formula:C<sub>24</sub>H<sub>60</sub>O<sub>6</sub>Si<sub>6</sub> CAS:29267-01-4 MolWeight:612 RetIndex:2194

CompName:Inositol, epi-, 6TMS \$\$ Inositol, 1,2,3,4,5,6-hexakis-O-(trimethylsilyl)-, epi- \$\$ Trimethyl((2,3,4,5,6-pentakis[(trimethylsilyl)oxy]cyclohexyl)ox

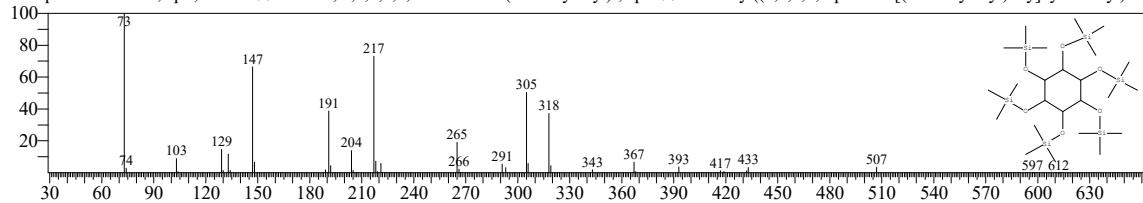

Hit#5 Entry:43145 Library:NIST20M2.lib

SI:80 Formula:C<sub>24</sub>H<sub>60</sub>O<sub>6</sub>Si<sub>6</sub> CAS:29412-26-8 MolWeight:612 RetIndex:2194

CompName:Muco-Inositol, 6TMS \$\$ Inositol, 1,2,3,4,5,6-hexakis-O-(trimethylsilyl)-, muco- \$\$ Trimethyl((2,3,4,5,6-pentakis[(trimethylsilyl)oxy]cyclohexyl)ox

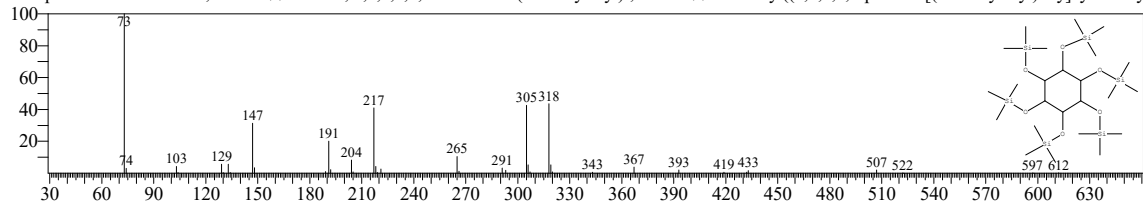

# TNAU

<< Target >>

Line#9 R.Time:30.720(Scan#:5145) MassPeaks:362

RawMode:Averaged 30.715-30.725(5144-5146) BasePeak:217.10(1213)

BG Mode:Calc. from Peak Group 1 - Event 1 Q3 Scan

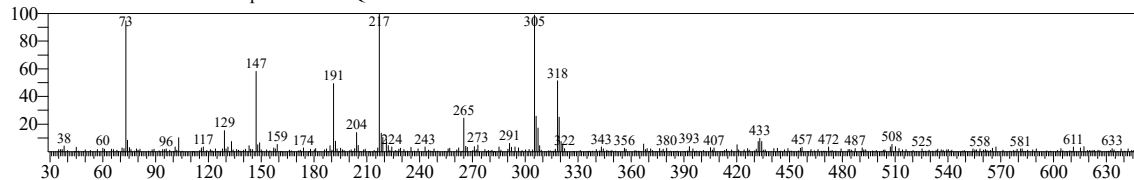

Hit#:1 Entry:43552 Library:NIST20R.lib

SI:91 Formula:C<sub>24</sub>H<sub>60</sub>O<sub>6</sub>Si<sub>6</sub> CAS:2582-79-8 MolWeight:612 RetIndex:2194

CompName:Myo-Inositol, 6TMS \$ Inositol, 1,2,3,4,5,6-hexakis-O-(trimethylsilyl)-, myo- \$ Trime

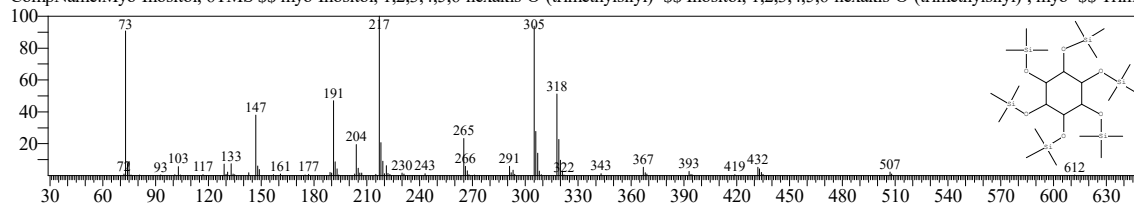

Hit#:2 Entry:465 Library:OA TMS DB5 67min V3.lib

SI:90 Formula:C<sub>24</sub>H<sub>60</sub>O<sub>6</sub>Si<sub>6</sub> CAS:87-89-8 MolWeight:612 RetIndex:2132

CompName:Inositol-6TMS(2) ; cyclohexane-1,2,3,4,5,6-hexol

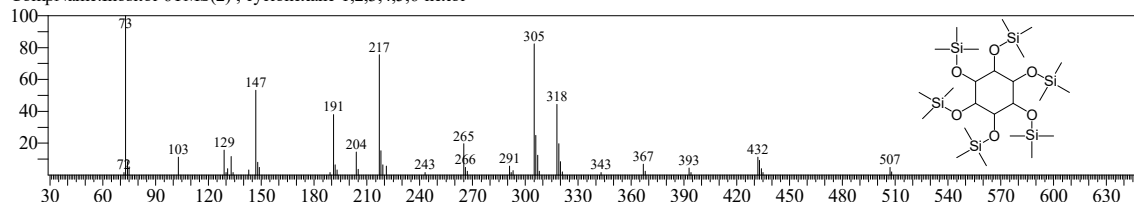

Hit#:3 Entry:43146 Library:NIST20M2.lib

SI:82 Formula:C<sub>24</sub>H<sub>60</sub>O<sub>6</sub>Si<sub>6</sub> CAS:29267-01-4 MolWeight:612 RetIndex:2194

CompName:Inositol, epi-, 6TMS \$ Inositol, 1,2,3,4,5,6-hexakis-O-(trimethylsilyl)-, epi- \$ Trimethyl((2,3,4,5,6-pentakis[(trimethylsilyl)oxy]cyclohexyl)ox

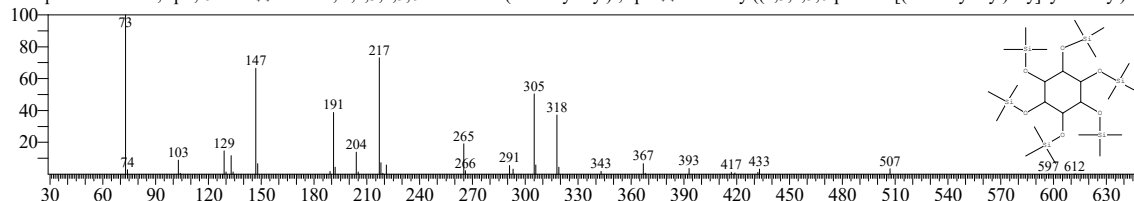

Hit#:4 Entry:43144 Library:NIST20M2.lib

SI:82 Formula:C<sub>24</sub>H<sub>60</sub>O<sub>6</sub>Si<sub>6</sub> CAS:14251-18-4 MolWeight:612 RetIndex:2194

CompName:Scyllo-Inositol, 6TMS \$ Inositol, 1,2,3,4,5,6-hexakis-O-(trimethylsilyl)-, scyllo- \$ Trimethyl((2,3,4,5,6-pentakis[(trimethylsilyl)oxy]cyclohex

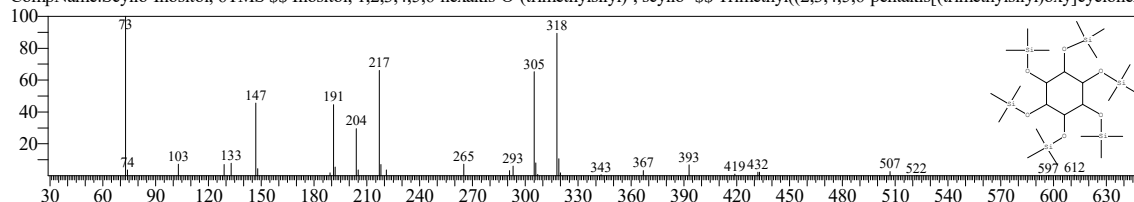

Hit#:5 Entry:43149 Library:NIST20M2.lib

SI:78 Formula:C<sub>24</sub>H<sub>60</sub>O<sub>6</sub>Si<sub>6</sub> CAS:29412-27-9 MolWeight:612 RetIndex:2194

CompName:Inositol, cis-, 6TMS \$ Inositol, (Z)-, 6TMS derivative \$ Inositol, 1,2,3,4,5,6-hexakis-O-(trimethylsilyl)-, cis- \$ Trimethyl((2,3,4,5,6-pentakis

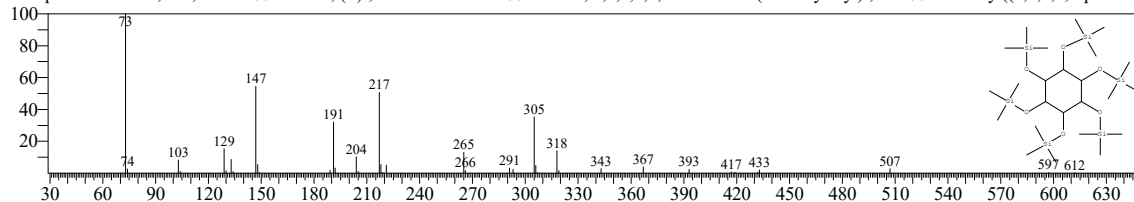

# TNAU

<< Target >>

Line#:10 R.Time:31.480(Scan#:5297) MassPeaks:394

RawMode:Averaged 31.475-31.485(5296-5298) BasePeak:67.10(1786)

BG Mode:Calc. from Peak Group 1 - Event 1 Q3 Scan

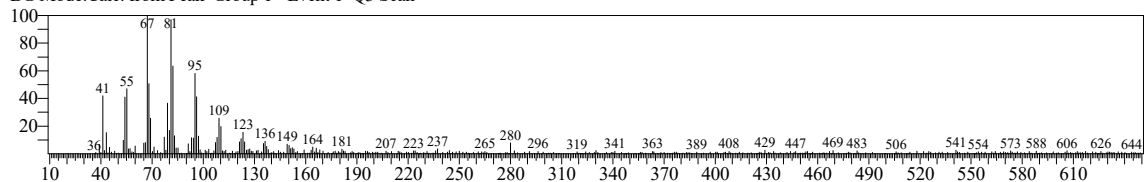

Hit#:1 Entry:34035 Library:NIST20R.lib

SI:93 Formula:C18H32O2 CAS:60-33-3 MolWeight:280 RetIndex:2183

CompName:9,12-Octadecadienoic acid (Z,Z)- \$\$ cis-9,cis-12-Octadecadienoic acid \$\$ cis,cis-Linoleic acid \$\$ Grape seed oil \$\$ Linoleic acid \$

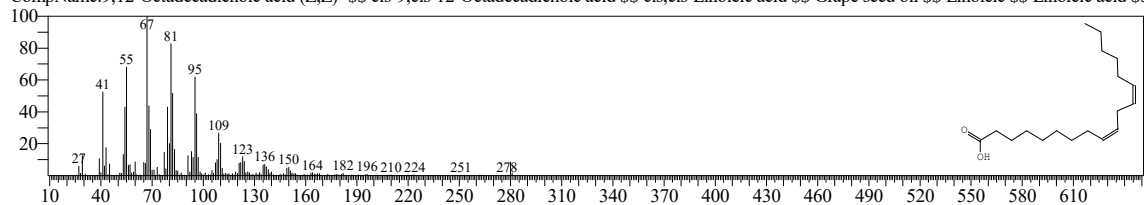

Hit#:2 Entry:139651 Library:NIST20M1.lib

SI:93 Formula:C18H32O2 CAS:544-71-8 MolWeight:280 RetIndex:2183

CompName:(9E,11E)-Octadecadienoic acid

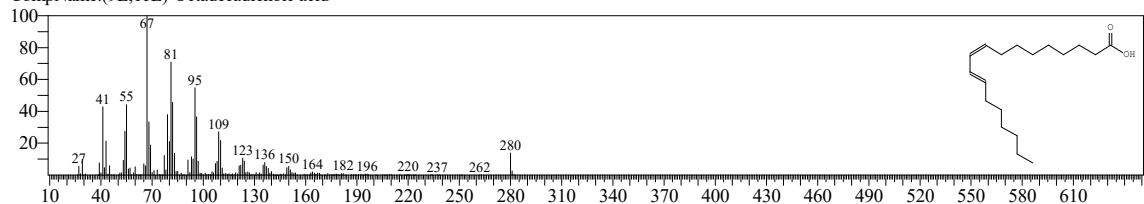

Hit#:3 Entry:139646 Library:NIST20M1.lib

SI:92 Formula:C18H32O2 CAS:2420-56-6 MolWeight:280 RetIndex:2183

CompName:10E,12Z-Octadecadienoic acid

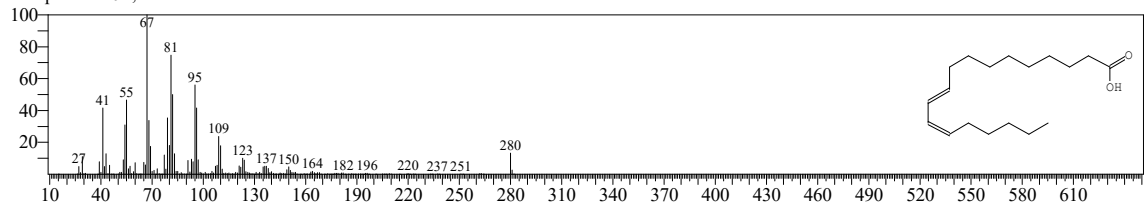

Hit#:4 Entry:139661 Library:NIST20M1.lib

SI:92 Formula:C18H32O2 CAS:506-21-8 MolWeight:280 RetIndex:2183

CompName:Linoelaidic acid

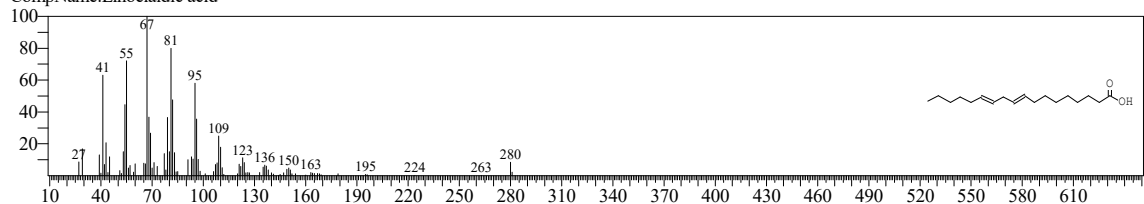

Hit#:5 Entry:173215 Library:NIST20M1.lib

SI:91 Formula:C20H36O2 CAS:2091-39-6 MolWeight:308 RetIndex:2382

CompName:11,14-Eicosadienoic acid

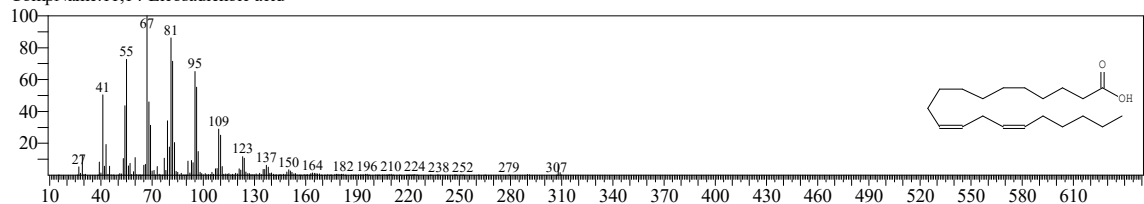

# TNAU

<< Target >>

Line#:11 R.Time:31.580(Scan#:5317) MassPeaks:428

RawMode:Averaged 31.575-31.585(5316-5318) BasePeak:79.05(1123)

BG Mode:Calc. from Peak Group 1 - Event 1 Q3 Scan

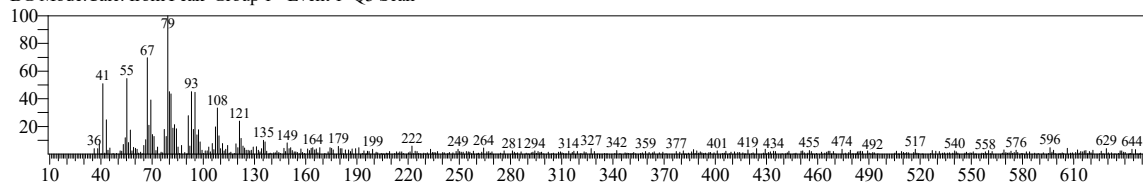

Hit#:1 Entry:87848 Library:NIST20M1.lib

SI:89 Formula:C16H26O CAS:56797-43-4 MolWeight:234 RetIndex:1824

CompName:cis,cis,cis-7,10,13-Hexadecatrienal \$ (7Z,10Z,13Z)-7,10,13-Hexadecatrienal #

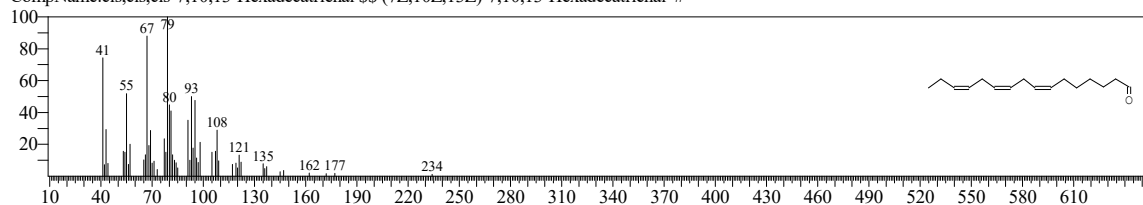

Hit#:2 Entry:137464 Library:NIST20M1.lib

SI:89 Formula:C18H30O2 CAS:463-40-1 MolWeight:278 RetIndex:2191

CompName:9,12,15-Octadecatrienoic acid, (Z,Z,Z)- \$ Linolenic acid \$ .alpha.-Linolenic acid \$ All-cis-9,12,15-Octadecatrienoic acid \$ cis,cis,cis-9,12,15-Octadecatrienoic acid

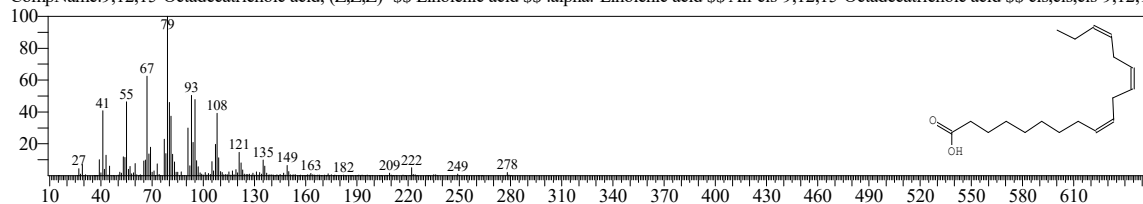

Hit#:3 Entry:35226 Library:NIST20R.lib

SI:89 Formula:C19H32O2 CAS:301-00-8 MolWeight:292 RetIndex:2101

CompName:9,12,15-Octadecatrienoic acid, methyl ester, (Z,Z,Z)- \$ Linolenic acid, methyl ester \$ Methyl all-cis-9,12,15-octadecatrienoate \$ Methyl lino

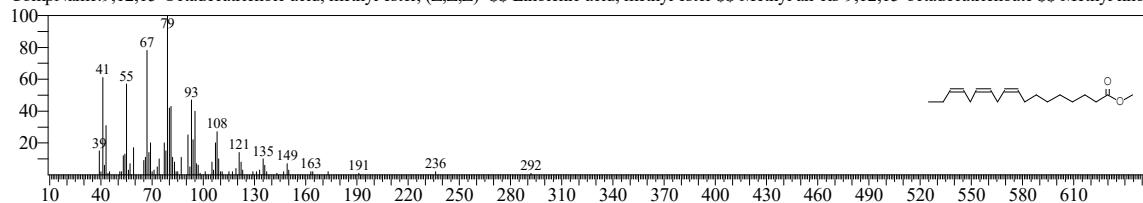

Hit#:4 Entry:37523 Library:NIST20R.lib

SI:88 Formula:C21H36O2 CAS:55682-88-7 MolWeight:320 RetIndex:2300

CompName:11,14,17-Eicosatrienoic acid, methyl ester \$ Methyl 11,14,17-icosatrienoate \$ Methyl 11,14,17-eicosatrienoate

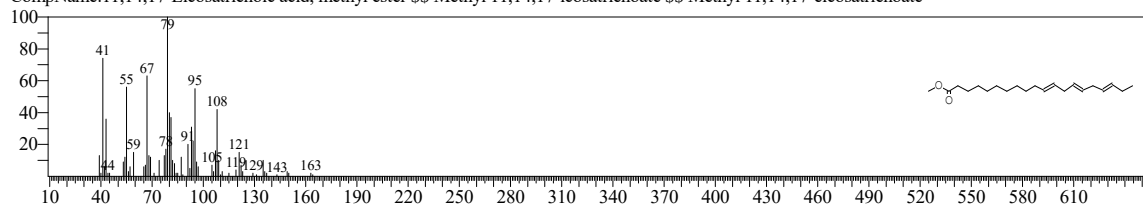

Hit#:5 Entry:32465 Library:NIST20R.lib

SI:88 Formula:C18H32O CAS:506-44-5 MolWeight:264 RetIndex:2077

CompName:9,12,15-Octadecatrien-1-ol, (Z,Z,Z)- \$ (9E,12E,15E)-9,12,15-Octadecatrien-1-ol # \$ (Z,Z,Z)-9,12,15-Octadecatrien-1-ol

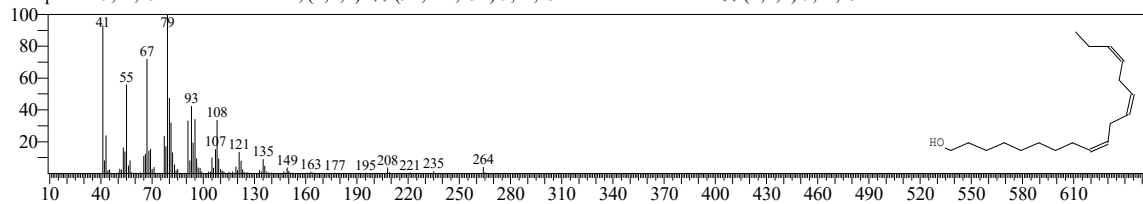

Supplement: Supplementary file 58 [file supplementary]
