# Supplementary material for: Comparative Metabolomics Profiling Reveals Key Metabolites and Associated Pathways Regulating Tuber Dormancy in White Yam (<em>Dioscorea rotundata</em>)
Source: Preprints.org preprint supplement (doi:10.20944/preprints202303.0378.v1), 2023-03-21

# TNAU

## Sample Information

Analyzed by : Admin  
 Analyzed : 02-Sep-22 7:38:29 AM  
 Sample Type : Unknown  
 Level # : 1  
 Sample Name : Sample  
 Sample ID : 6-1  
 IS Amount : [1]=1  
 Sample Amount : 1  
 Dilution Factor : 1  
 Vial # : 7  
 Injection Volume : 2.00  
 Data File : D:\GCMS-8040NX\Sep 2022\Users\01.09.2022\01092022017.qgd  
 Org Data File : D:\GCMS-8040NX\Sep 2022\Users\01.09.2022\01092022017.qgd  
 Method File : D:\GCMS-8040NX\Sep 2022\Method\Scan\_methodfile.qgm  
 Org Method File : D:\GCMS-8040NX\Sep 2022\Method\Scan\_methodfile.qgm  
 Report File :  
 Tuning File : D:\GCMS-8040NX\Aug 2022\Tuning Data\TUNING 25082022.qgt  
 Modified by : Admin  
 Modified : 05-Sep-22 11:03:17 AM

Chromatogram Sample D:\GCMS-8040NX\Sep 2022\Users\01.09.2022\01092022017.qgd

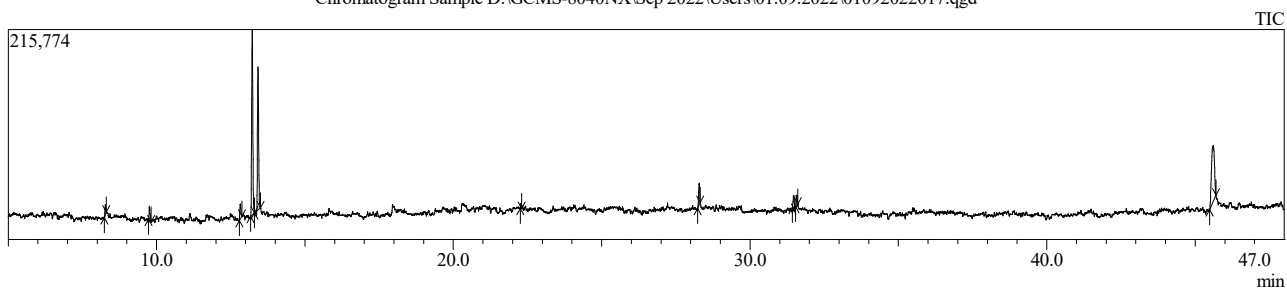

Peak Report TIC

| Peak# | R.Time | Area    | Area%  | Height | Height% | A/H  | Similarity | Name                                  |
|-------|--------|---------|--------|--------|---------|------|------------|---------------------------------------|
| 1     | 8.273  | 20350   | 1.36   | 10918  | 2.25    | 1.86 | 81         | 1-Butanol, 3-methyl-, acetate         |
| 2     | 9.760  | 31767   | 2.13   | 14502  | 2.98    | 2.19 | 93         | Pentasiloxane, dodecamethyl-          |
| 3     | 12.820 | 38071   | 2.55   | 15386  | 3.17    | 2.47 | 71         | 2,5-Cyclohexadiene-1,4-dione, dioxime |
| 4     | 13.224 | 500642  | 33.54  | 190458 | 39.18   | 2.63 | 54         | Methyl cis-13,16-Docosadienate        |
| 5     | 13.419 | 379398  | 25.42  | 146987 | 30.24   | 2.58 | 54         | Methyl cis-13,16-Docosadienate        |
| 6     | 22.284 | 7545    | 0.51   | 4863   | 1.00    | 1.55 | 17         | Norvaline-TMS                         |
| 7     | 28.287 | 53726   | 3.60   | 21928  | 4.51    | 2.45 | 92         | n-Hexadecanoic acid                   |
| 8     | 31.465 | 34866   | 2.34   | 13421  | 2.76    | 2.60 | 93         | (9E,11E)-Octadecadienoic acid         |
| 9     | 31.580 | 21596   | 1.45   | 10283  | 2.12    | 2.10 | 87         | 9-Octadecenoic acid                   |
| 10    | 45.613 | 404650  | 27.11  | 57349  | 11.80   | 7.06 | 89         | Diosgenin                             |
|       |        | 1492611 | 100.00 | 486095 | 100.00  |      |            |                                       |

Library

# TNAU

<< Target >>

Line#:1 R.Time:8.275(Scan#:656) MassPeaks:373

RawMode:Averaged 8.270-8.280(655-657) BasePeak:43.00(1631)

BG Mode:Calc. from Peak Group 1 - Event 1 Q3 Scan

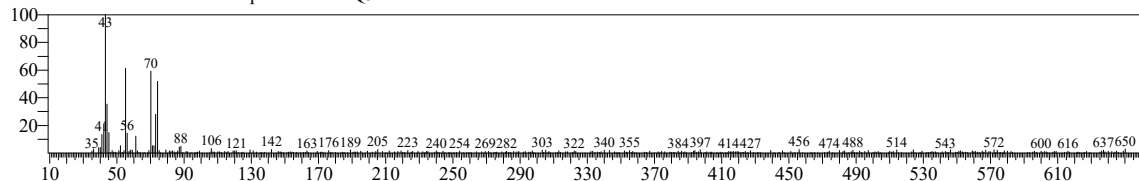

Hit#:1 Entry:6784 Library:NIST20R.lib

SI:81 Formula:C7H14O2 CAS:123-92-2 MolWeight:130 RetIndex:820

CompName:1-Butanol, 3-methyl-, acetate \$\$ Isopentyl alcohol, acetate \$\$ Acetic acid, 3-methylbutyl ester \$\$ Banana oil \$\$ Isoamyl acetate \$\$ Isoamyl etha

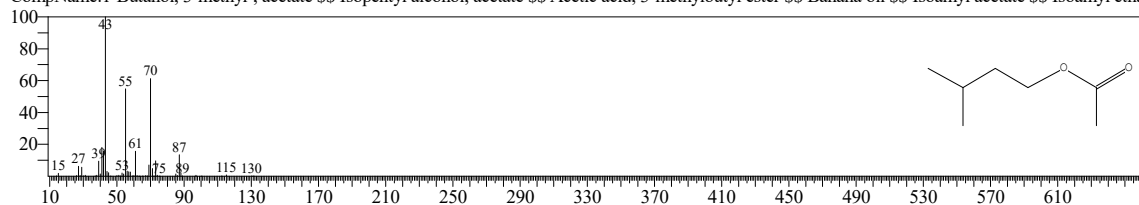

Hit#:2 Entry:8685 Library:NIST20M1.lib

SI:78 Formula:C7H14O2 CAS:628-63-7 MolWeight:130 RetIndex:884

CompName:Acetic acid, pentyl ester \$\$ n-Amyl acetate \$\$ n-Pentyl acetate \$\$ Amyl acetate \$\$ Birnenöl \$\$ Pentyl acetate \$\$ Acetic acid, amyl ester \$\$ An

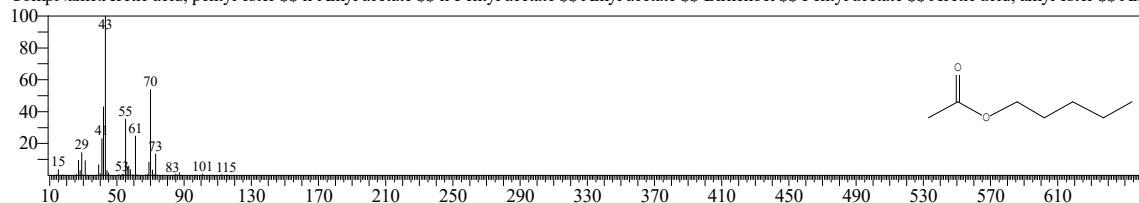

Hit#:3 Entry:6819 Library:NIST20R.lib

SI:77 Formula:C7H14O2 CAS:624-41-9 MolWeight:130 RetIndex:820

CompName:1-Butanol, 2-methyl-, acetate \$\$ 2-Methyl-1-butyl acetate \$\$ 2-Methylbutyl acetate \$\$ Acetic acid 2-methylbutyl ester \$\$ 2-Methylbutyl acetate

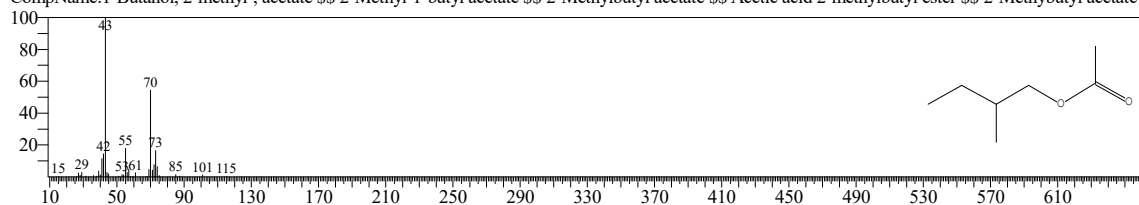

Hit#:4 Entry:32045 Library:NIST20M1.lib

SI:75 Formula:C6H10N2O4 CAS:0-00-0 MolWeight:174 RetIndex:1774

CompName:3-(N'-Acetylhydrazinecarbonyl)propanoic acid

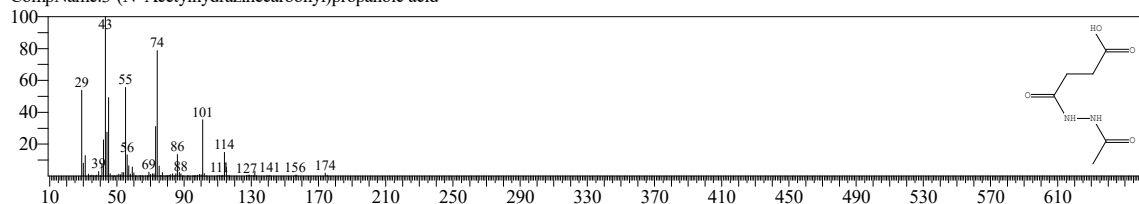

Hit#:5 Entry:1220 Library:NIST20R.lib

SI:75 Formula:C4H8O2 CAS:590-90-9 MolWeight:88 RetIndex:798

CompName:CH3C(O)CH2CH2OH \$\$ Methylolacetone \$\$ Monomethylolacetone \$\$ 3-Ketobutan-1-ol \$\$ 3-Oxo-1-butanol \$\$ 3-Oxobutanol \$\$ 4-Butanol-

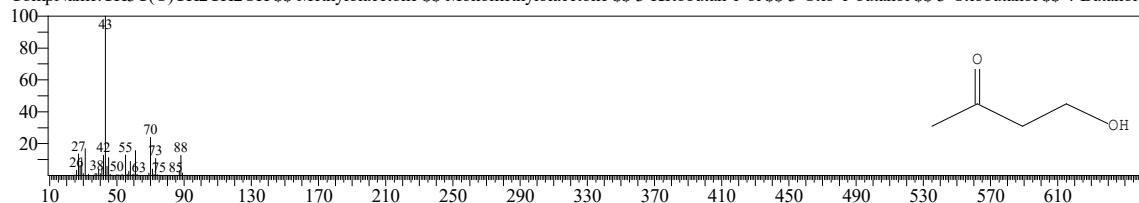

# TNAU

<< Target >>

Line#:2 R.Time:9.760(Scan#:953) MassPeaks:327

RawMode:Averaged 9.755-9.765(952-954) BasePeak:281.05(3499)

BG Mode:Calc. from Peak Group 1 - Event 1 Q3 Scan

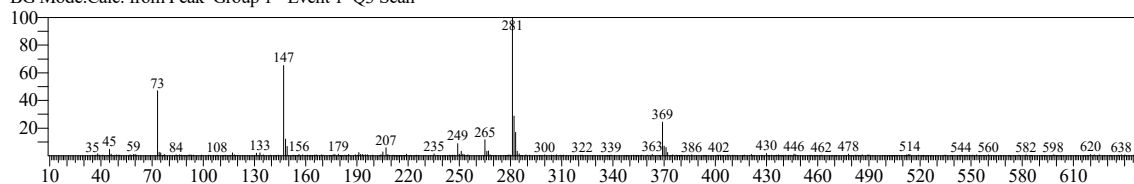

Hit#:1 Entry:40975 Library:NIST20R.lib

SI:93 Formula:C<sub>12</sub>H<sub>36</sub>O<sub>4</sub>Si<sub>5</sub> CAS:141-63-9 MolWeight:384 RetIndex:1068

CompName:Pentasiloxane, dodecamethyl- \$\$ Dodecamethylpentasiloxane \$\$ 1,1,1,3,3,5,5,7,7,9,9-Dodecamethylpentasiloxane #

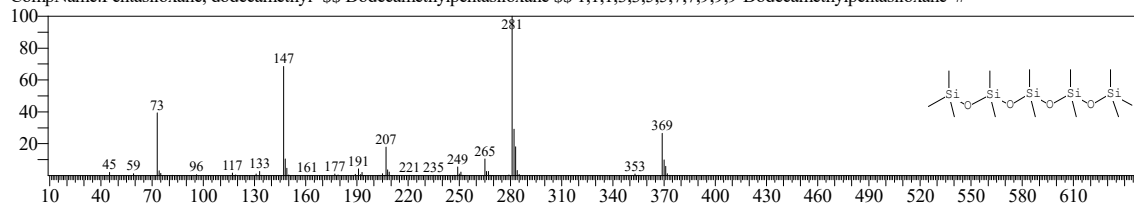

Hit#:2 Entry:249272 Library:NIST20M1.lib

SI:83 Formula:C<sub>12</sub>H<sub>36</sub>O<sub>4</sub>Si<sub>5</sub> CAS:3555-47-3 MolWeight:384 RetIndex:1068

CompName:Trisiloxane, 1,1,1,5,5,5-hexamethyl-3,3-bis[(trimethylsilyl)oxy]- \$\$ Tetrakis(trimethylsiloxy)silane \$\$ Trisiloxane, 1,1,1,5,5,5-hexamethyl-3,3-b

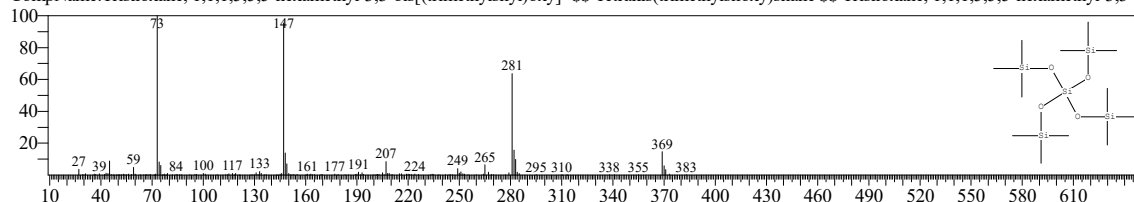

Hit#:3 Entry:27848 Library:NIST20M2.lib

SI:80 Formula:C<sub>18</sub>H<sub>48</sub>O<sub>4</sub>Si<sub>5</sub> CAS:0-00-0 MolWeight:468 RetIndex:1495

CompName:1,3,5,7,9-Pentasiloxane, 1,1,3,3,5,5,7,7,9,9-decamethyl-1,9-di(tert.butyl)-

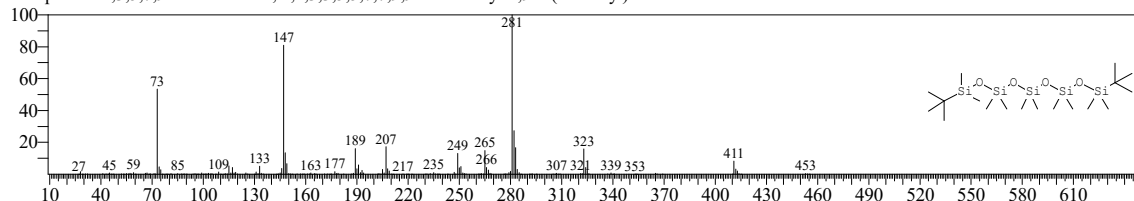

Hit#:4 Entry:249271 Library:NIST20M1.lib

SI:78 Formula:C<sub>12</sub>H<sub>36</sub>O<sub>4</sub>Si<sub>5</sub> CAS:38146-99-5 MolWeight:384 RetIndex:1068

CompName:1,1,1,3,3,5,5,7,7-Nonamethyl-3-(trimethylsiloxy)tetrasiloxane \$\$ 1,1,1,3,3,5,5,7,7-Nonamethyl-5-[(trimethylsilyl)oxy]tetrasiloxane #

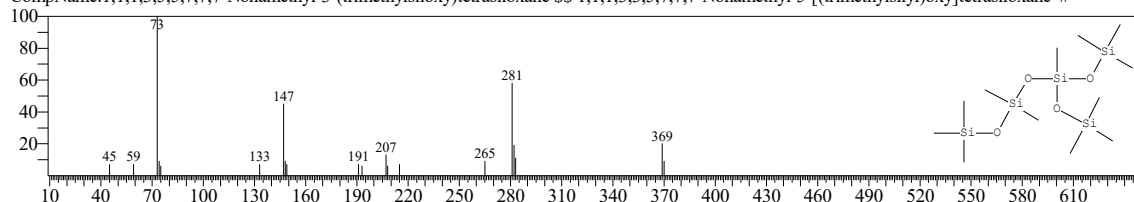

Hit#:5 Entry:158097 Library:NIST20M1.lib

SI:76 Formula:C<sub>14</sub>H<sub>24</sub>O<sub>3</sub>Si<sub>2</sub> CAS:0-00-0 MolWeight:296 RetIndex:1625

CompName:2,6-Dihydroxyacetophenone, 2TMS derivative \$\$ 2',6'-Dihydroxyacetophenone, bis(trimethylsilyl) ether

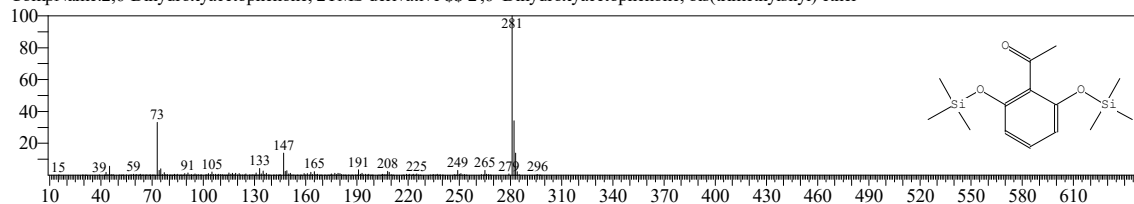

# TNAU

<< Target >>

Line#3 R.Time:12.820(Scan#:1565) MassPeaks:369

RawMode:Averaged 12.815-12.825(1564-1566) BasePeak:138.05(4919)

BG Mode:Calc. from Peak Group 1 - Event 1 Q3 Scan

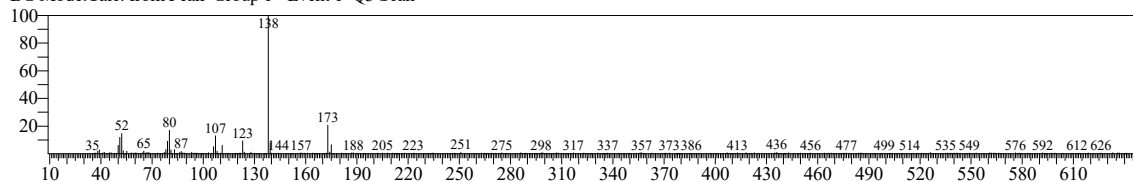

Hit#:1 Entry:8360 Library:NIST20R.lib

SI:71 Formula:C6H6N2O2 CAS:105-11-3 MolWeight:138 RetIndex:1349

CompName:2,5-Cyclohexadiene-1,4-dione, dioxime \$\$ p-Benzoquinone, dioxime \$\$ p-Quinone dioxime \$\$ p-Quinone oxime \$\$ Benzoquinone dioxime \$\$

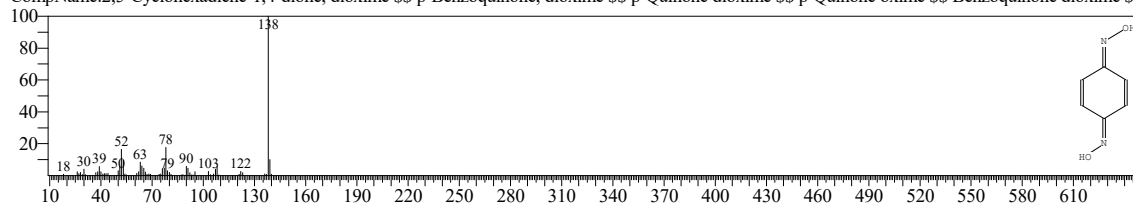

Hit#:2 Entry:25 Library:FA\_ME\_SP2560\_EI\_V3.lib

SI:33 Formula:C19H32O2 CAS:463-40-1 MolWeight:292 RetIndex:2892

CompName:Methyl linolenate ; (9Z,12Z,15Z)-octadeca-9,12,15-trienoic acid

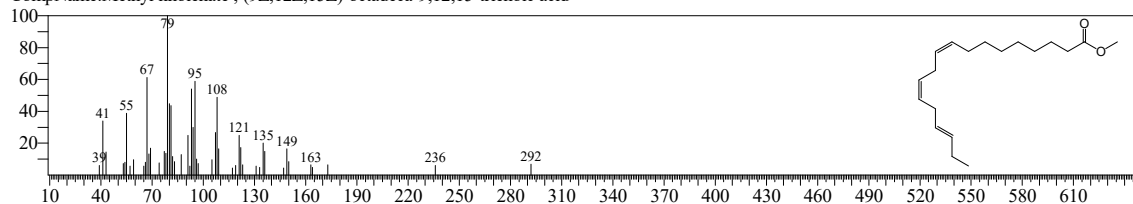

Hit#:3 Entry:21 Library:FA\_ME\_SP2560\_EI\_V3.lib

SI:32 Formula:C19H34O2 CAS:60-33-3 MolWeight:294 RetIndex:2775

CompName:Methyl linoleate ; Octadeca-9,12-dienoic acid

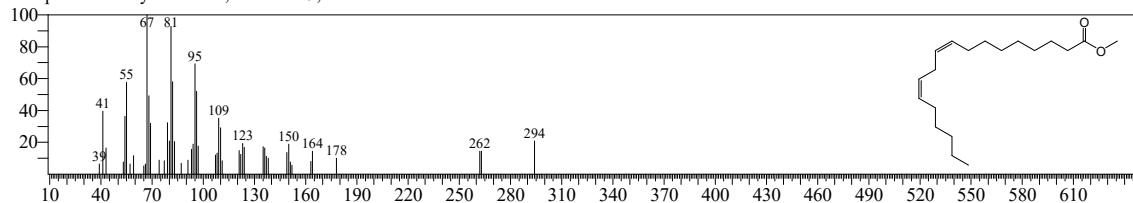

Hit#:4 Entry:34 Library:FA\_ME\_SP2560\_EI\_V3.lib

SI:31 Formula:C23H42O2 CAS:7370-49-2 MolWeight:350 RetIndex:3169

CompName:Methyl cis-13,16-Docosadienate ; (13Z,16E)-docosa-13,16-dienoic acid

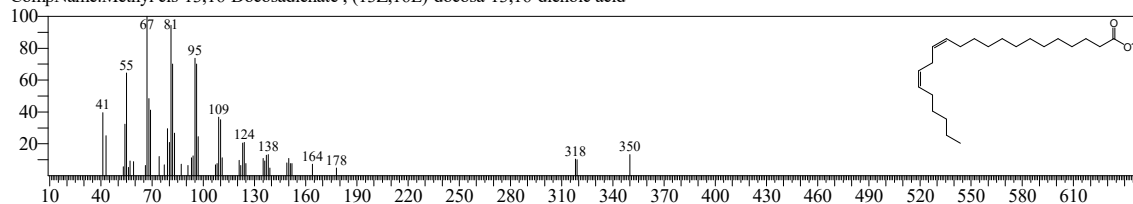

Hit#:5 Entry:20 Library:FA\_ME\_SP2560\_EI\_V3.lib

SI:31 Formula:C19H34O2 CAS:506-21-8 MolWeight:294 RetIndex:2727

CompName:Methyl linolelaidate ; (9E,12E)-octadeca-9,12-dienoic acid

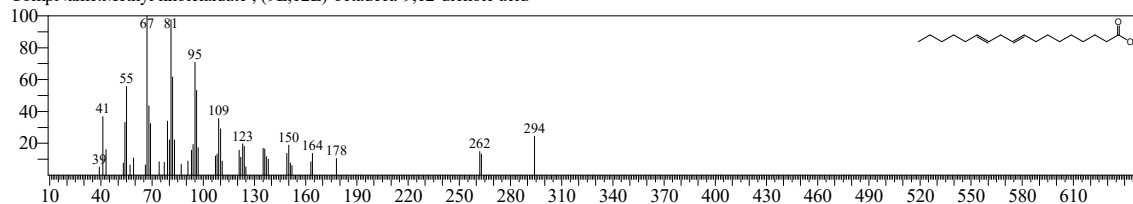

# TNAU

<< Target >>

Line#:4 R.Time:13.225(Scan#:1646) MassPeaks:362

RawMode:Averaged 13.220-13.230(1645-1647) BasePeak:155.05(28677)

BG Mode:Calc. from Peak Group 1 - Event 1 Q3 Scan

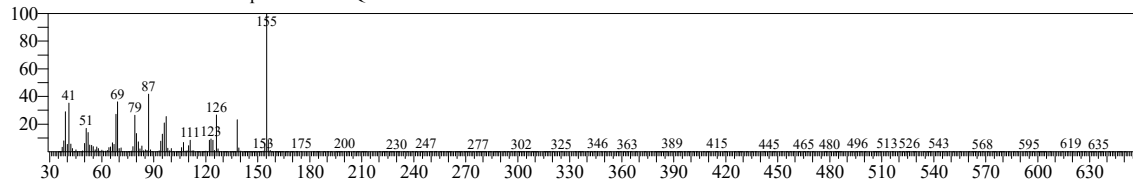

Hit#:1 Entry:34 Library:FA\_ME\_SP2560\_EI\_V3.lib

SI:54 Formula:C23H42O2 CAS:7370-49-2 MolWeight:350 RetIndex:3169

CompName:Methyl cis-13,16-Docosadienate ; (13Z,16E)-docosa-13,16-dienoic acid

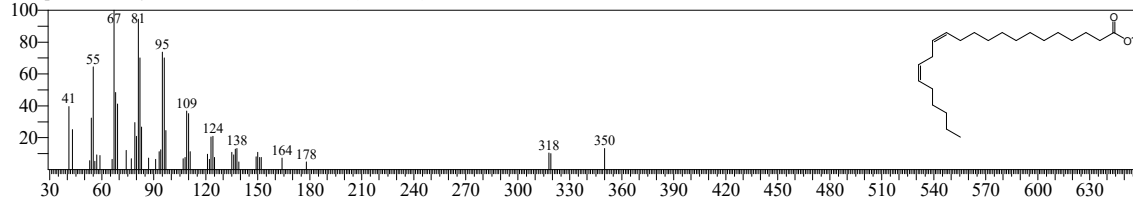

Hit#:2 Entry:21 Library:FA\_ME\_SP2560\_EI\_V3.lib

SI:53 Formula:C19H34O2 CAS:60-33-3 MolWeight:294 RetIndex:2775

CompName:Methyl linoleate ; Octadeca-9,12-dienoic acid

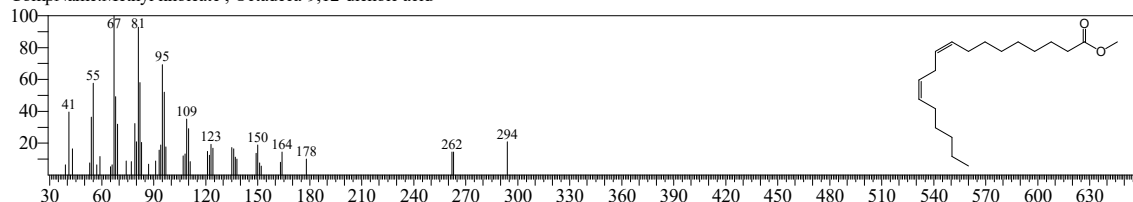

Hit#:3 Entry:20 Library:FA\_ME\_SP2560\_EI\_V3.lib

SI:52 Formula:C19H34O2 CAS:506-21-8 MolWeight:294 RetIndex:2727

CompName:Methyl linolelaidate ; (9E,12E)-octadeca-9,12-dienoic acid

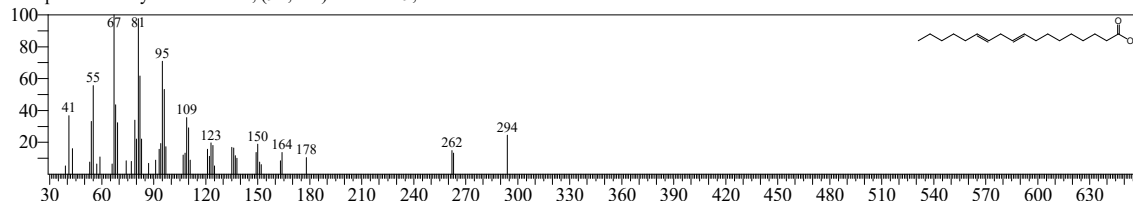

Hit#:4 Entry:27 Library:FA\_ME\_SP2560\_EI\_V3.lib

SI:52 Formula:C21H38O2 CAS:2091-39-6 MolWeight:322 RetIndex:2973

CompName:Methyl cis-11,14-Icosadienoate ; Icosa-11,14-dienoic acid

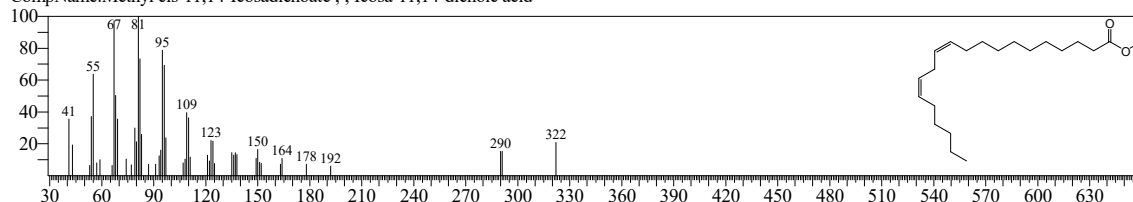

Hit#:5 Entry:11 Library:FA\_ME\_SP2560\_EI\_V3.lib

SI:52 Formula:C16H30O2 CAS:84743-29-3 MolWeight:254 RetIndex:2388

CompName:Methyl cis-10-pentadecenoate ; (Z)-pentadec-10-enoic acid

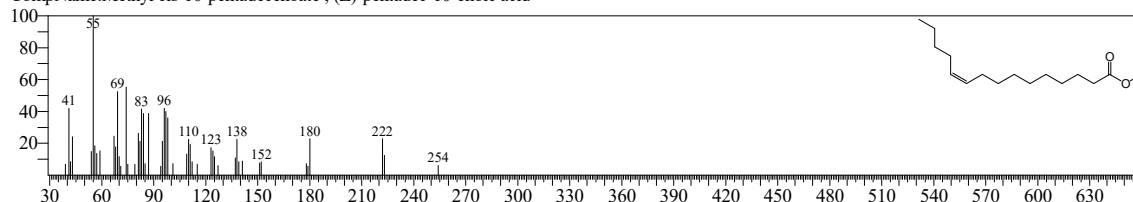

# TNAU

<< Target >>

Line#:5 R.Time:13.420(Scan#:1685) MassPeaks:327

RawMode:Averaged 13.415-13.425(1684-1686) BasePeak:155.05(22884)

BG Mode:Calc. from Peak Group 1 - Event 1 Q3 Scan

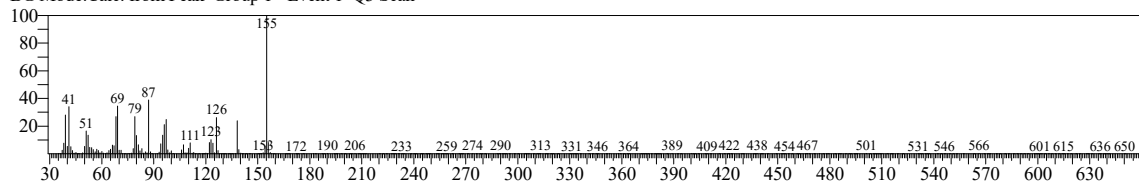

Hit#:1 Entry:34 Library:FA\_ME\_SP2560\_EI\_V3.lib

SI:54 Formula:C23H42O2 CAS:7370-49-2 MolWeight:350 RetIndex:3169

CompName:Methyl cis-13,16-Docosadienate ; (13Z,16E)-docosa-13,16-dienoic acid

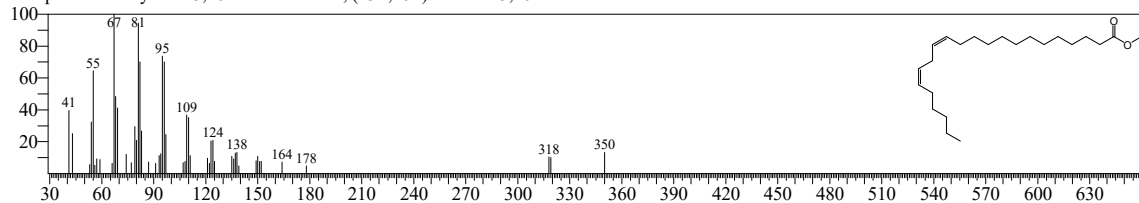

Hit#:2 Entry:21 Library:FA\_ME\_SP2560\_EI\_V3.lib

SI:53 Formula:C19H34O2 CAS:60-33-3 MolWeight:294 RetIndex:2775

CompName:Methyl linoleate ; Octadeca-9,12-dienoic acid

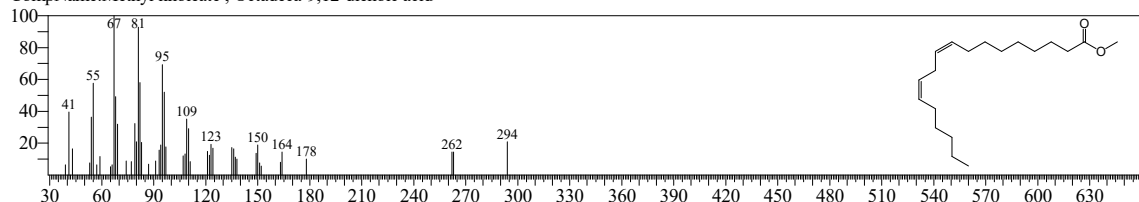

Hit#:3 Entry:20 Library:FA\_ME\_SP2560\_EI\_V3.lib

SI:52 Formula:C19H34O2 CAS:506-21-8 MolWeight:294 RetIndex:2727

CompName:Methyl linolelaidate ; (9E,12E)-octadeca-9,12-dienoic acid

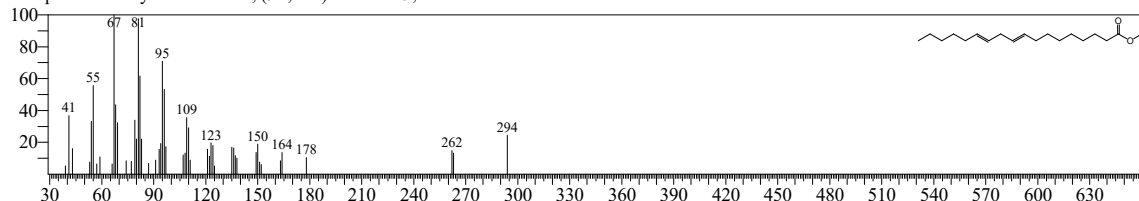

Hit#:4 Entry:27 Library:FA\_ME\_SP2560\_EI\_V3.lib

SI:52 Formula:C21H38O2 CAS:2091-39-6 MolWeight:322 RetIndex:2973

CompName:Methyl cis-11,14-Icosadienoate ; Icosa-11,14-dienoic acid

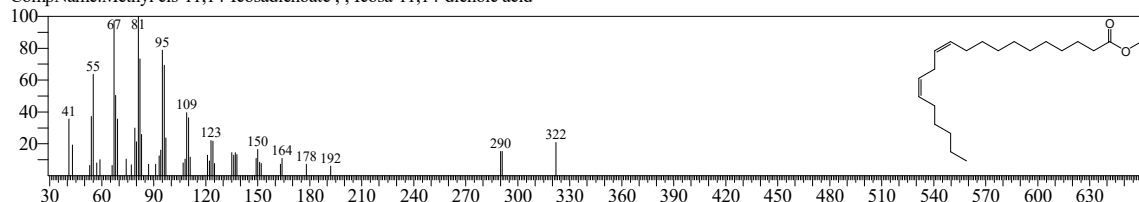

Hit#:5 Entry:11 Library:FA\_ME\_SP2560\_EI\_V3.lib

SI:52 Formula:C16H30O2 CAS:84743-29-3 MolWeight:254 RetIndex:2388

CompName:Methyl cis-10-pentadecenoate ; (Z)-pentadec-10-enoic acid

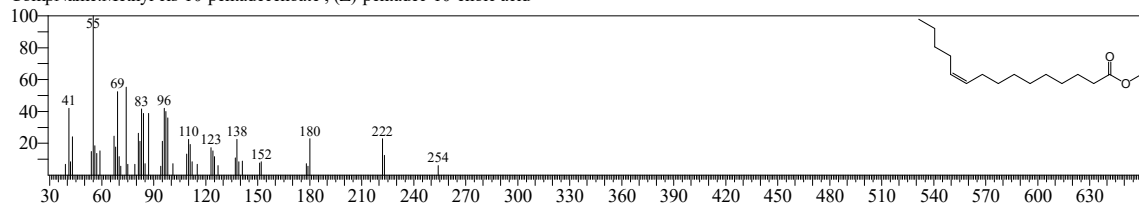

# TNAU

<< Target >>

Line#6 R.Time:22.285(Scan#:3458) MassPeaks:413

RawMode:Averaged 22.280-22.290(3457-3459) BasePeak:85.00(69)

BG Mode:Calc. from Peak Group 1 - Event 1 Q3 Scan

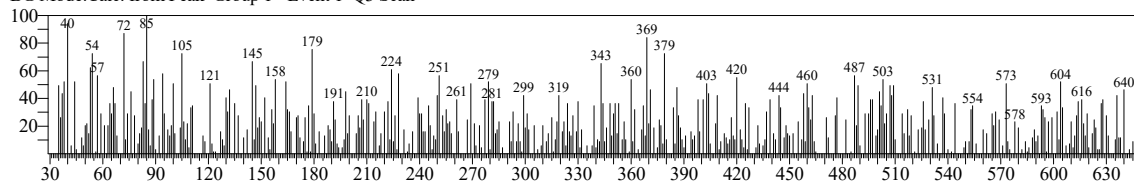

Hit#:1 Entry:18 Library:OA\_TMS\_DB5\_67min\_V3.lib

SI:17 Formula:C8H19NO2Si CAS:6600-40-4 MolWeight:189 RetIndex:1113

CompName:Norvaline-TMS ; (2S)-2-aminopentanoic acid

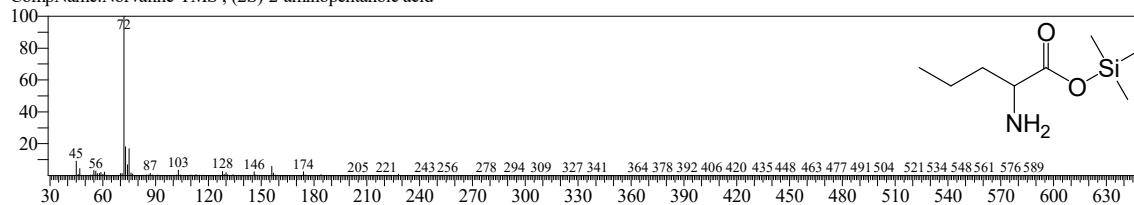

Hit#:2 Entry:138 Library:OA\_TMS\_DB5\_67min\_V3.lib

SI:16 Formula:C14H24O3Si2 CAS:90-64-2 MolWeight:296 RetIndex:1486

CompName:Mandelic acid-2TMS ; 2-hydroxy-2-phenylacetic acid

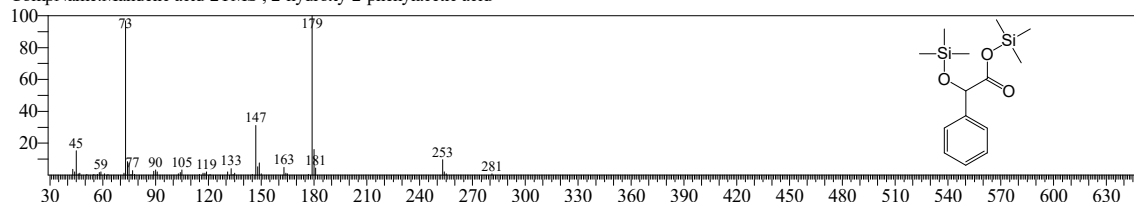

Hit#:3 Entry:66 Library:OA\_TMS\_DB5\_67min\_V3.lib

SI:16 Formula:C10H14O2Si CAS:65-85-0 MolWeight:194 RetIndex:1252

CompName:Benzoic acid-TMS ; benzoic acid

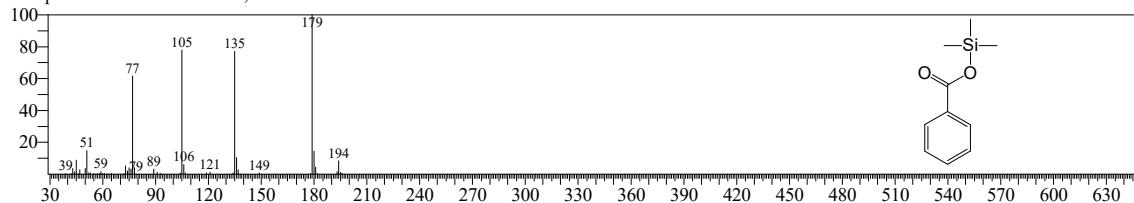

Hit#:4 Entry:456 Library:OA\_TMS\_DB5\_67min\_V3.lib

SI:14 Formula:C18H33NO3Si CAS:37350-58-6 MolWeight:339 RetIndex:2094

CompName:Metoprolol-TMS ; 1-[4-(2-methoxyethyl)phenoxy]-3-(propan-2-ylamino)propan-2-ol

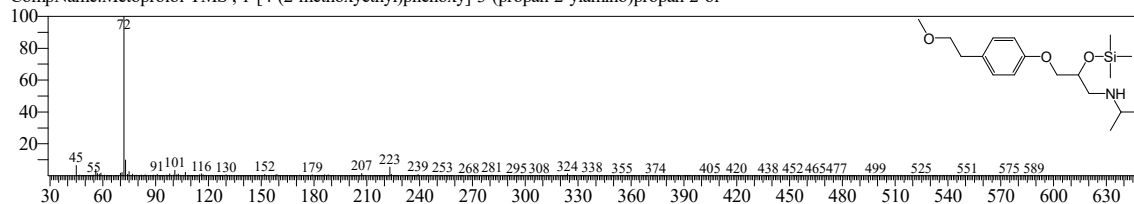

Hit#:5 Entry:90 Library:OA\_TMS\_DB5\_67min\_V3.lib

SI:14 Formula:C10H20O4Si2 CAS:110-16-7 MolWeight:260 RetIndex:1306

CompName:Maleic acid-2TMS ; (Z)-but-2-enedioic acid

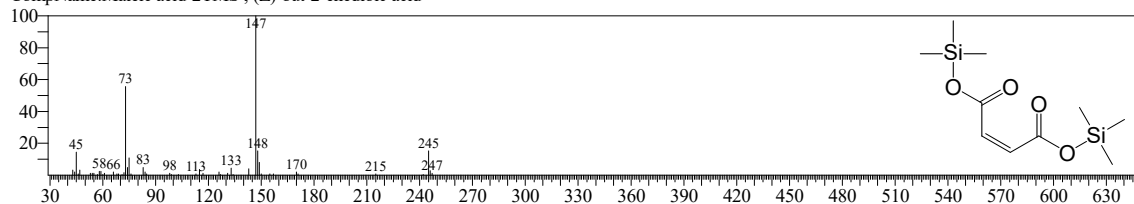

# TNAU

<< Target >>

Line#:7 R.Time:28.285(Scan#:4658) MassPeaks:333

RawMode:Averaged 28.280-28.290(4657-4659) BasePeak:73.05(1813)

BG Mode:Calc. from Peak Group 1 - Event 1 Q3 Scan

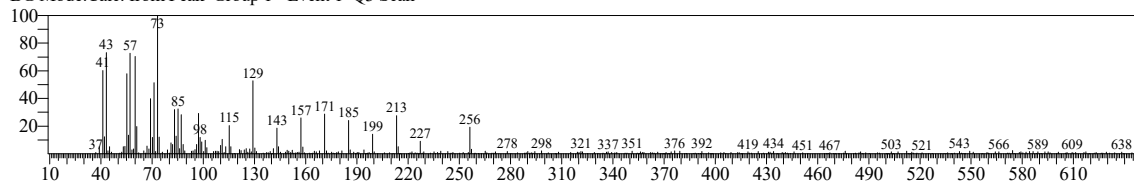

Hit#:1 Entry:31600 Library:NIST20R.lib

SI:92 Formula:C16H32O2 CAS:57-10-3 MolWeight:256 RetIndex:1968

CompName:n-Hexadecanoic acid \$\$ Hexadecanoic acid \$\$ n-Hexadecic acid \$\$ Palmitic acid \$\$ Pentadecanecarboxylic acid \$\$ 1-Pentadecanecarboxylic

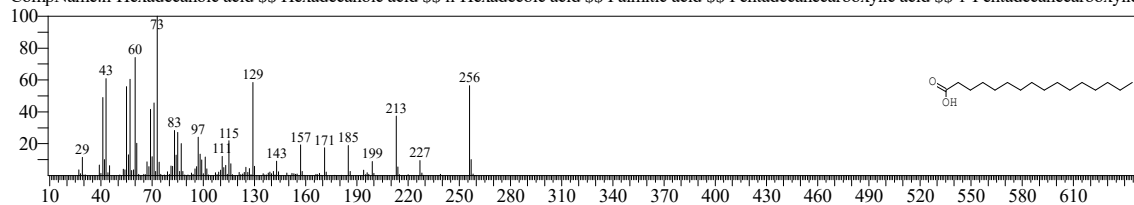

Hit#:2 Entry:29890 Library:NIST20R.lib

SI:91 Formula:C15H30O2 CAS:1002-84-2 MolWeight:242 RetIndex:1869

CompName:Pentadecanoic acid \$\$ Pentadecylic acid \$\$ n-Pentadecanoic acid \$\$ n-Pentadecylic acid

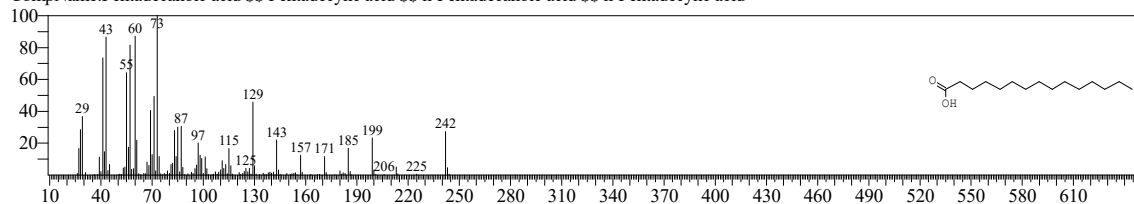

Hit#:3 Entry:25643 Library:NIST20R.lib

SI:89 Formula:C13H26O2 CAS:638-53-9 MolWeight:214 RetIndex:1670

CompName:Tridecanoic acid \$\$ n-Tridecanoic acid \$\$ n-Tridecoic acid \$\$ Tridecyclic acid

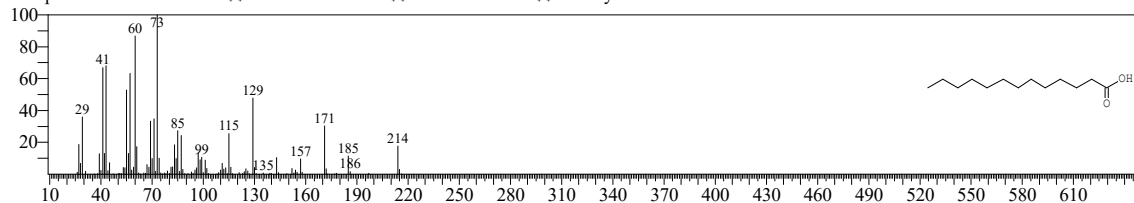

Hit#:4 Entry:44286 Library:NIST20M2.lib

SI:89 Formula:C38H68O8 CAS:28474-90-0 MolWeight:652 RetIndex:4765

CompName:l-(+)-Ascorbic acid 2,6-dihexadecanoate

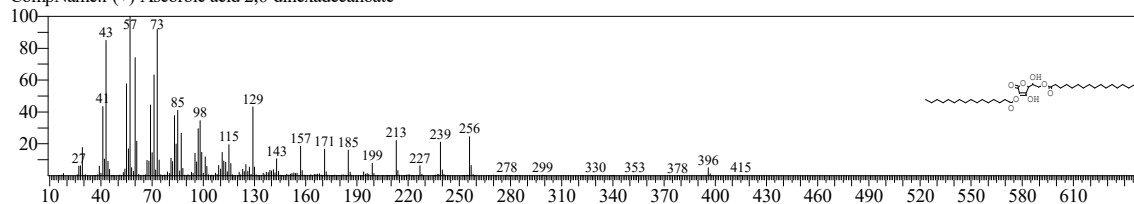

Hit#:5 Entry:81713 Library:NIST20M1.lib

SI:88 Formula:C14H28O2 CAS:544-63-8 MolWeight:228 RetIndex:1769

CompName:Tetradecanoic acid \$\$ Myristic acid \$\$ n-Tetradecanoic acid \$\$ n-Tetradecic acid \$\$ Neo-Fat 14 \$\$ Univol U 316S \$\$ 1-Tridecanecarboxylic ;

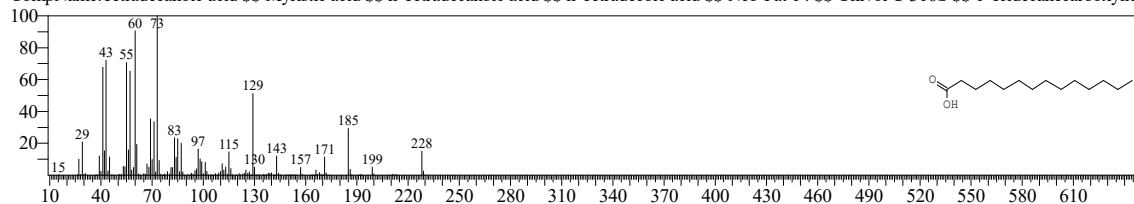



# TNAU

<< Target >>

Line#:8 R.Time:31.465(Scan#:5294) MassPeaks:357

RawMode:Averaged 31.460-31.470(5293-5295) BasePeak:67.05(1202)

BG Mode:Calc. from Peak Group 1 - Event 1 Q3 Scan

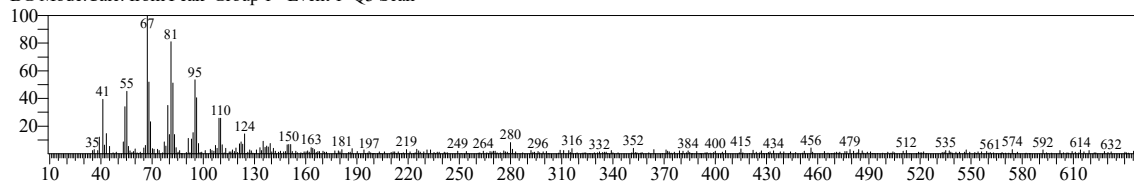

Hit#:1 Entry:139651 Library:NIST20M1.lib

SI:93 Formula:C18H32O2 CAS:544-71-8 MolWeight:280 RetIndex:2183

CompName:(9E,11E)-Octadecadienoic acid

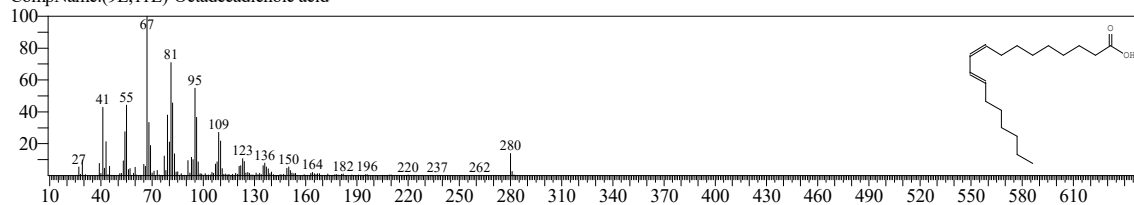

Hit#:2 Entry:139646 Library:NIST20M1.lib

SI:93 Formula:C18H32O2 CAS:2420-56-6 MolWeight:280 RetIndex:2183

CompName:10E,12Z-Octadecadienoic acid

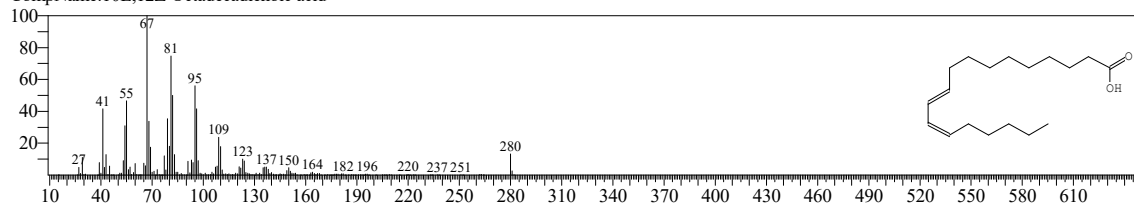

Hit#:3 Entry:34035 Library:NIST20R.lib

SI:92 Formula:C18H32O2 CAS:60-33-3 MolWeight:280 RetIndex:2183

CompName:9,12-Octadecadienoic acid (Z,Z)- \$\$ cis-9,cis-12-Octadecadienoic acid \$\$ cis,cis-Linoleic acid \$\$ Grape seed oil \$\$ Linoleic acid \$

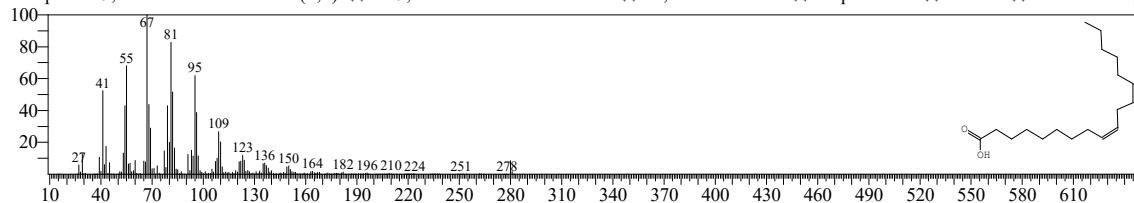

Hit#:4 Entry:139661 Library:NIST20M1.lib

SI:91 Formula:C18H32O2 CAS:506-21-8 MolWeight:280 RetIndex:2183

CompName:Linoelaidic acid

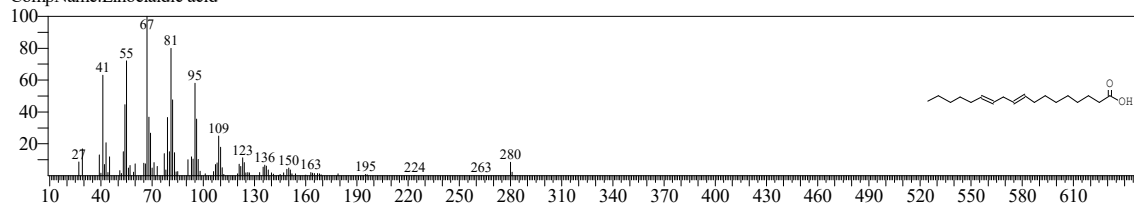

Hit#:5 Entry:156597 Library:NIST20M1.lib

SI:90 Formula:C19H34O2 CAS:2462-85-3 MolWeight:294 RetIndex:2093

CompName:9,12-Octadecadienoic acid, methyl ester \$\$ 9,12-Octadecenoic acid, methyl ester \$\$ Methyl octadeca-9,12-dienoate \$\$ Methyl 9,12-octadecadienoate

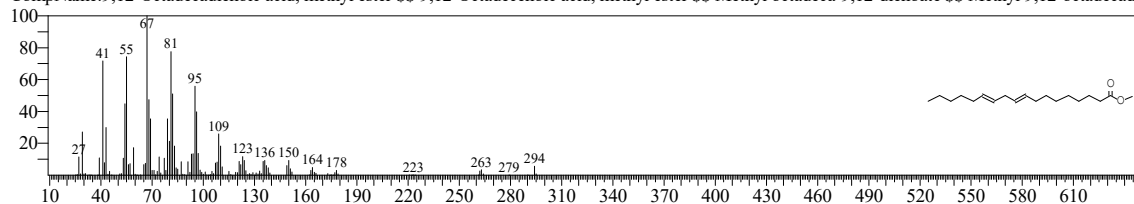

<< Target >>

RawMode:Averaged 31.575-31.585(5316-5318) BasePeak:55.10(565)

BG Mode: Calc. from Peak Group 1 - Event 1 Q3 Scan

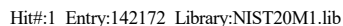

SI:87 Formula:C18H34O2 CAS:2027-47-6 MolWeight:282 RetIndex:2175

CompName:9-Octadecenoic acid

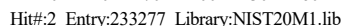

SI:86 Formula:C20H35F3O2 CAS:0-00-0 MolWeight:364 RetIndex:2019

CompName:Oleyl alcohol, trifluoroacetate

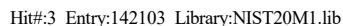

SI:86 Formula:C18H34O2 CAS:593-39-5 MolWeight:282 RetIndex:2175

CompName:6-Octadecenoic acid, (Z)- \$\$ (6Z)-6-Octadecenoic acid # \$\$ cis- -6-Octadecenoic acid \$\$ (Z)-Octadec-6-enoic acid \$\$ Petroselinic acid

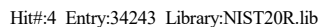

SI:86 Formula:C18H34O2 CAS:112-79-8 MolWeight:282 RefIndex:2175

CompName:9-Octadecenoic acid, (E)- \$\$ trans-.delta.(sup 9)-Octadecenoic acid \$\$ trans-.delta.9-Octadecenoic acid \$\$ trans-Octadec-9-enoic acid \$\$ trans-

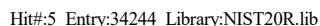

SI:85 Formula:C18H34O2 CAS:112-80-1 MolWeight:282 RetIndex:2175

CompName:Oleic Acid \$\$ 9-Octadecenoic acid (Z)- \$\$ .DELTA.9-cis-Oleic acid \$\$ cis-Oleic Acid \$\$ cis-9-Octadecenoic Acid \$\$ Emersol 211 \$\$ Emersol .

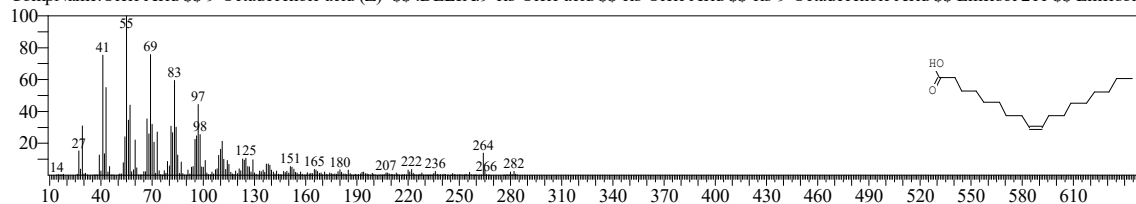

# TNAU

<< Target >>

Line#:10 R.Time:45.615(Scan#:8124) MassPeaks:427

RawMode:Averaged 45.610-45.620(8123-8125) BasePeak:139.10(5968)

BG Mode:Calc. from Peak Group 1 - Event 1 Q3 Scan

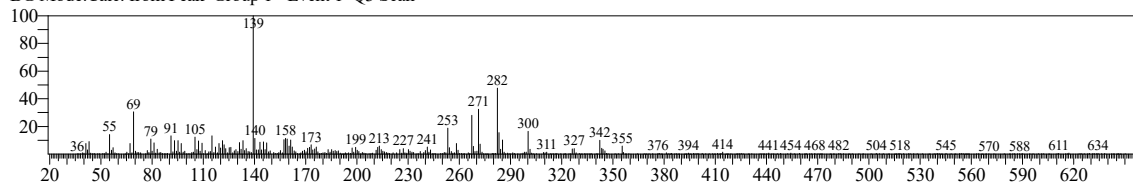

Hit#:1 Entry:8297 Library:NIST20M2.lib

SI:89 Formula:C27H42O3 CAS:512-04-9 MolWeight:414 RetIndex:2844

CompName:Diosgenin \$\$ Spirost-5-en-3-ol, (3.beta.,25R)- \$\$ Spirost-5-en-3.beta.-ol, (25R)- \$\$ Nitrogenin \$\$ 25D-spirost-5-en-3.beta.-ol \$\$ Spiro(8H-naph

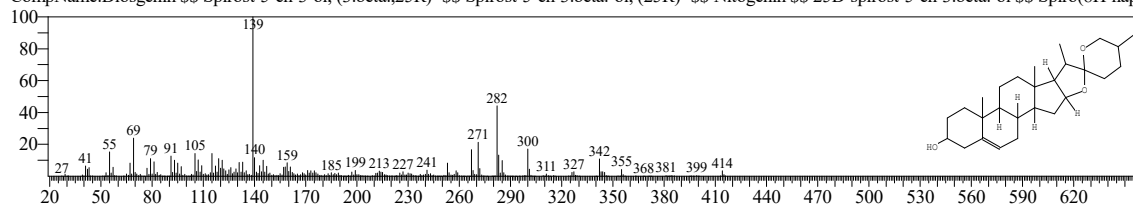

Hit#:2 Entry:14852 Library:NIST20M2.lib

SI:80 Formula:C28H44O3 CAS:116292-24-1 MolWeight:428 RetIndex:2793

CompName:Diosgenin methyl ether \$\$ Diosgenin Me derivative \$\$ (3.beta.,25R)-3-Methoxyspirost-5-ene \$\$ Spirost-5-ene, 3-methoxy-, (3.beta.,25R)-

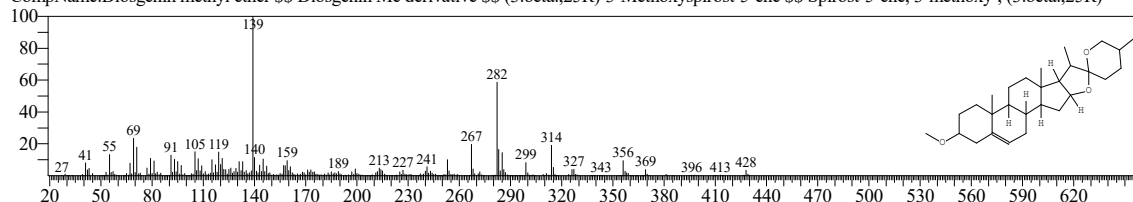

Hit#:3 Entry:24878 Library:NIST20M2.lib

SI:79 Formula:C29H44O4 CAS:1061-54-7 MolWeight:456 RetIndex:2984

CompName:Spirost-5-en-3-ol, acetate, (3.beta.,25R)- \$\$ Diosgenin acetate \$\$ Spirost-5-en-3.beta.-ol, acetate, (25R)- \$\$ Spirost-5-en-3.beta.-ol, acetate, (2-

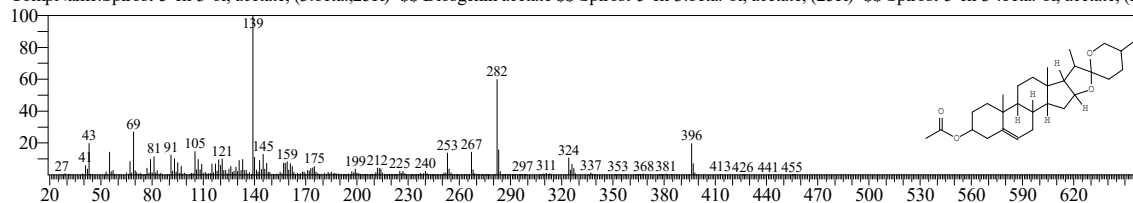

Hit#:4 Entry:41561 Library:NIST20R.lib

SI:78 Formula:C27H42O2 CAS:32277-73-9 MolWeight:398 RetIndex:2713

CompName:Des-N-solasodine \$\$ Furosta-5,20(22)-dien-3-ol #

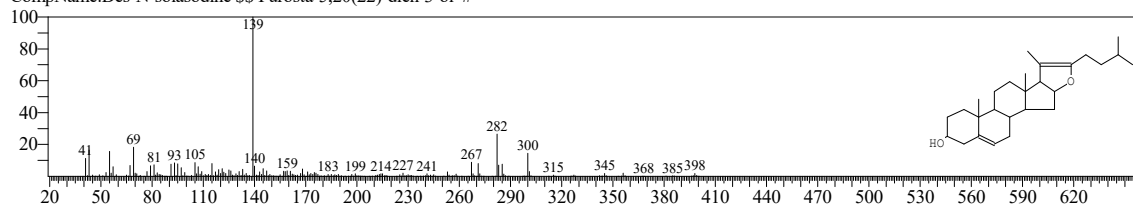

Hit#:5 Entry:42677 Library:NIST20R.lib

SI:74 Formula:C29H44O4 CAS:1180-12-7 MolWeight:456 RetIndex:2984

CompName:Neodiosgenin (3.beta.,25S) acetate \$\$ Spirost-5-en-3-ol, 3-acetate, (3.beta.,25S)- \$\$ Spirost-5-en-3-ol, acetate, (3.beta.,25S)- \$\$ Spirost-5-en-3-

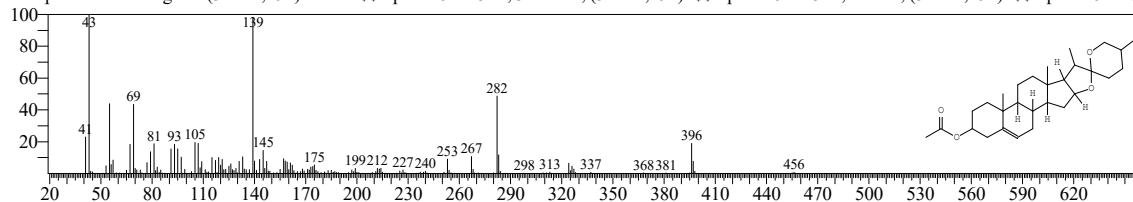

Supplement: Supplementary file 59 [file supplementary]
