# Supplementary material for: Comparative Metabolomics Profiling Reveals Key Metabolites and Associated Pathways Regulating Tuber Dormancy in White Yam (<em>Dioscorea rotundata</em>)
Source: Preprints.org preprint supplement (doi:10.20944/preprints202303.0378.v1), 2023-03-21

# TNAU

## Sample Information

Analyzed by : Admin  
 Analyzed : 02-Sep-22 2:41:00 PM  
 Sample Type : Unknown  
 Level # : 1  
 Sample Name : Sample  
 Sample ID : 8-3  
 IS Amount : [1]=1  
 Sample Amount : 1  
 Dilution Factor : 1  
 Vial # : 9  
 Injection Volume : 5.00  
 Data File : D:\GCMS-8040NX\Sep 2022\Users\01.09.2022\01092022025.qgd  
 Org Data File : D:\GCMS-8040NX\Sep 2022\Users\01.09.2022\01092022025.qgd  
 Method File : D:\GCMS-8040NX\Sep 2022\Method\Scan\_methodfile.qgm  
 Org Method File : D:\GCMS-8040NX\Sep 2022\Method\Scan\_methodfile.qgm  
 Report File :  
 Tuning File : D:\GCMS-8040NX\Aug 2022\Tuning Data\TUNING 25082022.qgt  
 Modified by : Admin  
 Modified : 05-Sep-22 11:07:26 AM

Chromatogram Sample D:\GCMS-8040NX\Sep 2022\Users\01.09.2022\01092022025.qgd

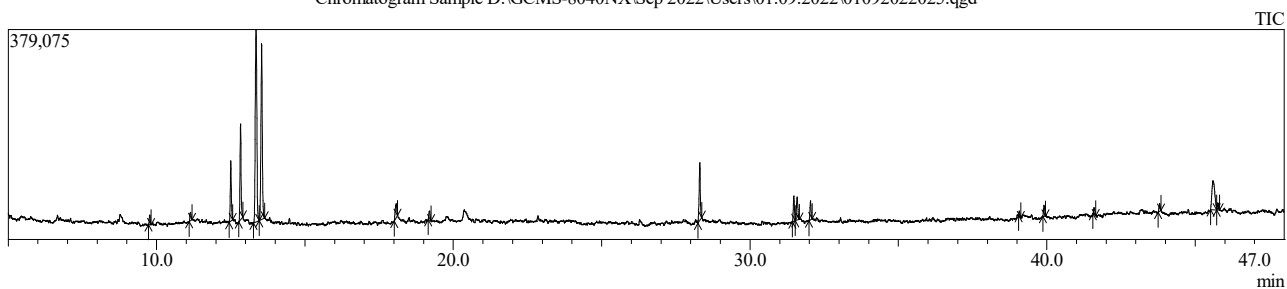

## Peak Report TIC

| Peak# | R.Time | Area    | Area%  | Height  | Height% | A/H  | Similarity | Name                                    |
|-------|--------|---------|--------|---------|---------|------|------------|-----------------------------------------|
| 1     | 9.769  | 40804   | 0.92   | 17291   | 1.27    | 2.36 | 94         | Pentasiloxane, dodecamethyl-            |
| 2     | 11.143 | 42744   | 0.96   | 15065   | 1.10    | 2.84 | 40         | Arachidonic acid-TMS                    |
| 3     | 12.501 | 275703  | 6.22   | 109523  | 8.03    | 2.52 | 73         | 2,5-Cyclohexadiene-1,4-dione, dioxime   |
| 4     | 12.829 | 437425  | 9.87   | 173265  | 12.70   | 2.52 | 74         | 1,3-Benzodioxol-5-ol                    |
| 5     | 13.353 | 1274018 | 28.75  | 347211  | 25.44   | 3.67 | 53         | Methyl cis-13,16-Docosadienate          |
| 6     | 13.542 | 1021088 | 23.05  | 317314  | 23.25   | 3.22 | 53         | Methyl cis-13,16-Docosadienate          |
| 7     | 18.075 | 97928   | 2.21   | 25546   | 1.87    | 3.83 | 91         | .beta.-D-Glucopyranose, 1,6-anhydro-    |
| 8     | 19.197 | 48166   | 1.09   | 16684   | 1.22    | 2.89 | 90         | 2,4-Di-tert-butylphenoxytrimethylsilane |
| 9     | 28.306 | 293674  | 6.63   | 103722  | 7.60    | 2.83 | 95         | n-Hexadecanoic acid                     |
| 10    | 31.475 | 128575  | 2.90   | 45735   | 3.35    | 2.81 | 95         | 9,12-Octadecadienoic acid (Z,Z)-        |
| 11    | 31.587 | 138886  | 3.13   | 42108   | 3.09    | 3.30 | 86         | cis-9-Hexadecenal                       |
| 12    | 32.038 | 88223   | 1.99   | 34570   | 2.53    | 2.55 | 93         | Octadecanoic acid                       |
| 13    | 39.072 | 17652   | 0.40   | 8958    | 0.66    | 1.97 | 78         | Tetracosamethyl-cyclododecasiloxane     |
| 14    | 39.906 | 52883   | 1.19   | 20030   | 1.47    | 2.64 | 94         | Bis(2-ethylhexyl) phthalate             |
| 15    | 41.589 | 36905   | 0.83   | 12120   | 0.89    | 3.04 | 83         | Tetracosamethyl-cyclododecasiloxane     |
| 16    | 43.802 | 36228   | 0.82   | 13557   | 0.99    | 2.67 | 83         | Tetracosamethyl-cyclododecasiloxane     |
| 17    | 45.596 | 355095  | 8.01   | 52246   | 3.83    | 6.80 | 90         | Diosgenin                               |
| 18    | 45.785 | 44642   | 1.01   | 9827    | 0.72    | 4.54 | 85         | Tetracosamethyl-cyclododecasiloxane     |
|       |        | 4430639 | 100.00 | 1364772 | 100.00  |      |            |                                         |

Library

# TNAU

<< Target >>

Line#:1 R.Time:9.770(Scan#:955) MassPeaks:311  
RawMode:Averaged 9.765-9.775(954-956) BasePeak:281.05(4297)  
BG Mode:Calc. from Peak Group 1 - Event 1 Q3 Scan

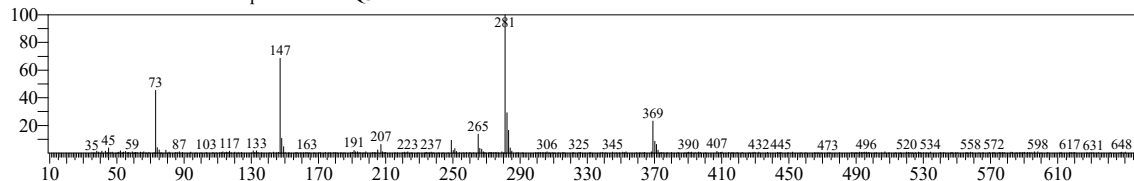

Hit#:1 Entry:40975 Library:NIST20R.lib

SI:94 Formula:C<sub>12</sub>H<sub>36</sub>O<sub>4</sub>Si<sub>5</sub> CAS:141-63-9 MolWeight:384 RetIndex:1068

CompName:Pentasiloxane, dodecamethyl- \$\$ Dodecamethylpentasiloxane \$\$ 1,1,1,3,3,5,5,7,7,9,9-Dodecamethylpentasiloxane #

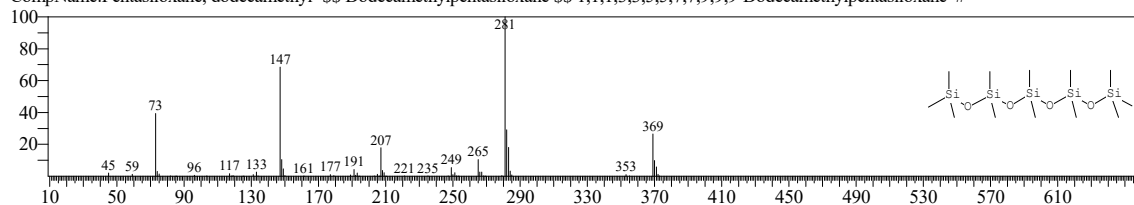

Hit#:2 Entry:249272 Library:NIST20M1.lib

SI:84 Formula:C<sub>12</sub>H<sub>36</sub>O<sub>4</sub>Si<sub>5</sub> CAS:3555-47-3 MolWeight:384 RetIndex:1068

CompName:Trisiloxane, 1,1,1,5,5,5-hexamethyl-3,3-bis[(trimethylsilyl)oxy]- \$\$ Tetrakis(trimethylsiloxy)silane \$\$ Trisiloxane, 1,1,1,5,5,5-hexamethyl-3,3-b

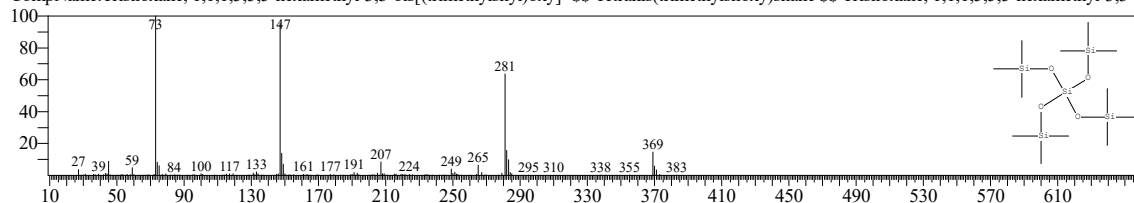

Hit#:3 Entry:27848 Library:NIST20M2.lib

SI:80 Formula:C<sub>18</sub>H<sub>48</sub>O<sub>4</sub>Si<sub>5</sub> CAS:0-00-0 MolWeight:468 RetIndex:1495

CompName:1,3,5,7,9-Pentasiloxane, 1,1,3,3,5,5,7,7,9,9-decamethyl-1,9-di(tert.butyl)-

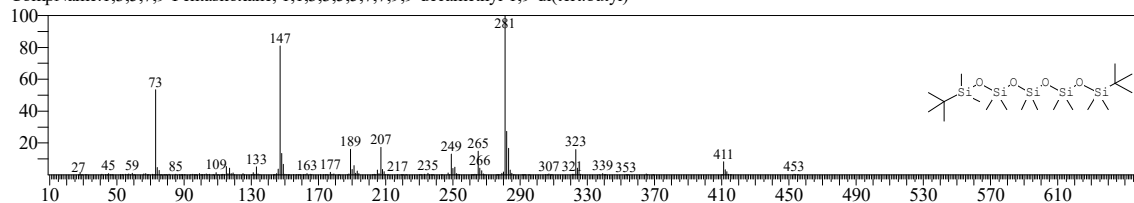

Hit#:4 Entry:249271 Library:NIST20M1.lib

SI:79 Formula:C<sub>12</sub>H<sub>36</sub>O<sub>4</sub>Si<sub>5</sub> CAS:38146-99-5 MolWeight:384 RetIndex:1068

CompName:1,1,1,3,5,5,7,7,7-Nonamethyl-3-(trimethylsiloxy)tetrasiloxane \$\$ 1,1,1,3,3,5,5,7,7,7-Nonamethyl-5-[(trimethylsilyl)oxy]tetrasiloxane #

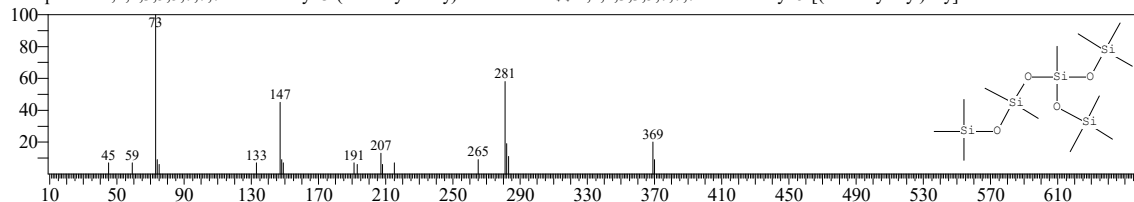

Hit#:5 Entry:158097 Library:NIST20M1.lib

SI:76 Formula:C<sub>14</sub>H<sub>24</sub>O<sub>3</sub>Si<sub>2</sub> CAS:0-00-0 MolWeight:296 RetIndex:1625

CompName:2,6-Dihydroxyacetophenone, 2TMS derivative \$\$ 2',6'-Dihydroxyacetophenone, bis(trimethylsilyl) ether

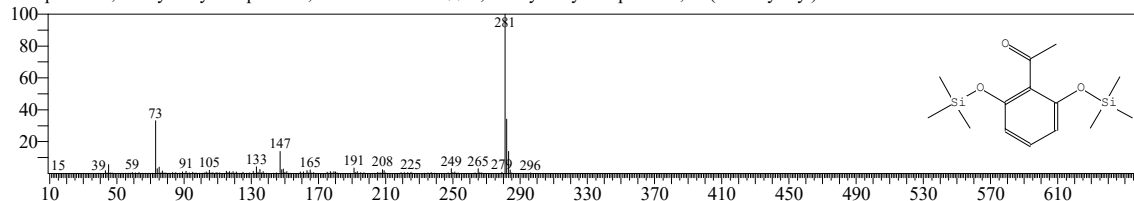

# TNAU

<< Target >>

Line#:2 R.Time:11.145(Scan#:1230) MassPeaks:281

RawMode:Averaged 11.140-11.150(1229-1231) BasePeak:69.00(1842)

BG Mode:Calc. from Peak Group 1 - Event 1 Q3 Scan

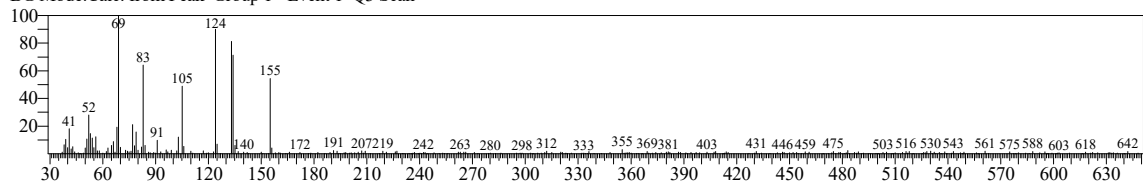

Hit#:1 Entry:508 Library:OA\_TMS\_DB5\_67min\_V3.lib

SI:40 Formula:C23H40O2Si CAS:506-32-1 MolWeight:376 RetIndex:2381

CompName:Arachidonic acid-TMS ; (5Z,8Z,11Z,14Z)-icosa-5,8,11,14-tetraenoic acid

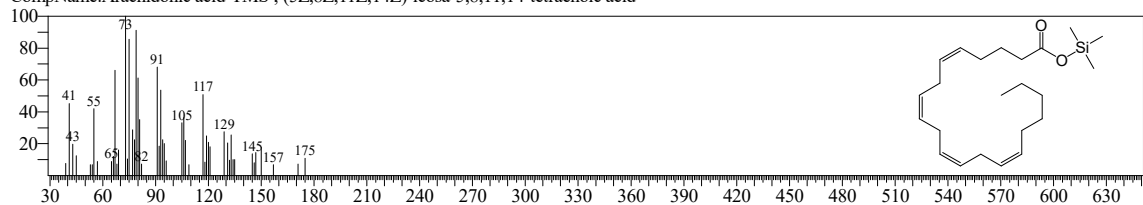

Hit#:2 Entry:196 Library:OA\_TMS\_DB5\_67min\_V3.lib

SI:39 Formula:C13H28O4Si2 CAS:111-16-0 MolWeight:304 RetIndex:1605

CompName:Pinelic acid-2TMS ; heptanedioic acid

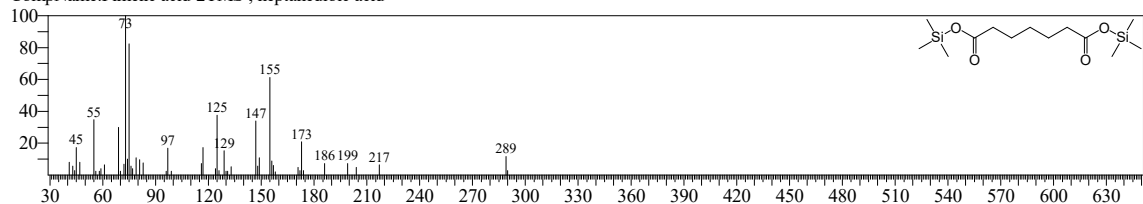

Hit#:3 Entry:38 Library:FA\_ME\_SP2560\_EI\_V3.lib

SI:38 Formula:C23H34O2 CAS:6217-54-5 MolWeight:342 RetIndex:3514

CompName:Methyl cis-4,7,10,13,16,19-Docosahexaenoate ; Docosa-4,7,10,13,16,19-hexaenoic acid

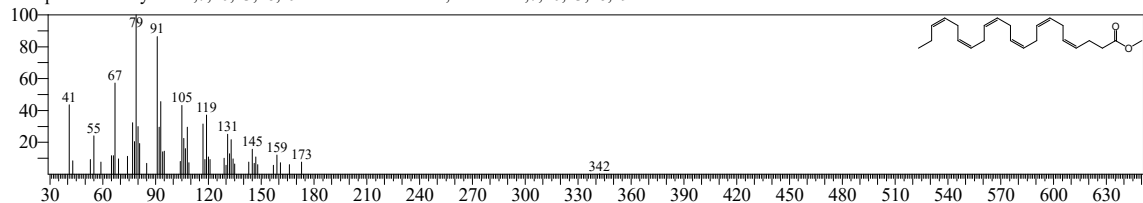

Hit#:4 Entry:9 Library:FA\_ME\_SP2560\_EI\_V3.lib

SI:37 Formula:C15H28O2 CAS:544-64-9 MolWeight:240 RetIndex:2283

CompName:Methyl myristoleate ; (Z)-tetradec-9-enoic acid

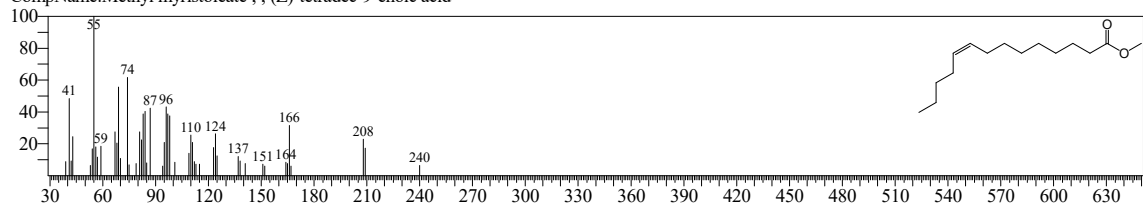

Hit#:5 Entry:36 Library:FA\_ME\_SP2560\_EI\_V3.lib

SI:37 Formula:C21H32O2 CAS:10417-94-4 MolWeight:316 RetIndex:3232

CompName:Methyl cis-5,8,11,14,17-Eicosapentaenoate ; Icosa-5,8,11,14,17-pentaenoic acid

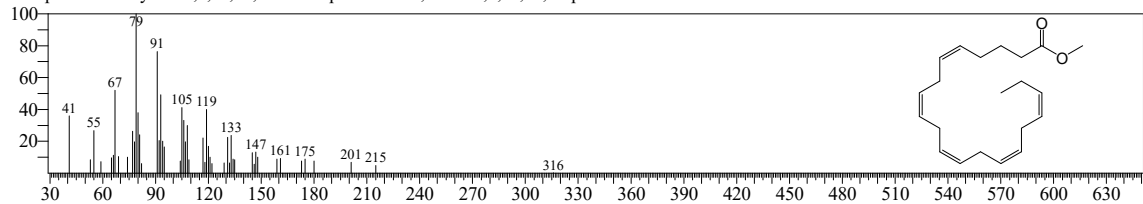

# TNAU

<< Target >>

Line#3 R.Time:12.500(Scan#:1501) MassPeaks:368

RawMode:Averaged 12.495-12.505(1500-1502) BasePeak:138.05(38394)

BG Mode:Calc. from Peak Group 1 - Event 1 Q3 Scan

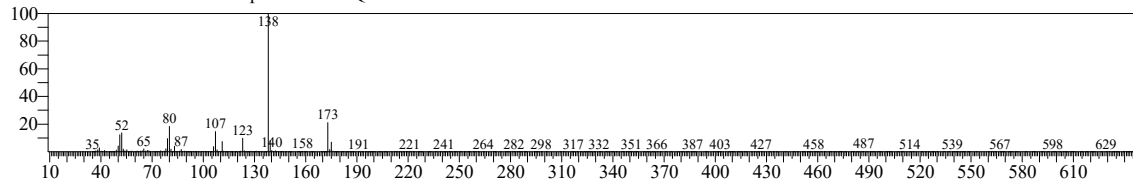

Hit#:1 Entry:8360 Library:NIST20R.lib

SI:73 Formula:C<sub>6</sub>H<sub>6</sub>N<sub>2</sub>O<sub>2</sub> CAS:105-11-3 MolWeight:138 RetIndex:1349

CompName:2,5-Cyclohexadiene-1,4-dione, dioxime \$\$ p-Benzoquinone, dioxime \$\$ p-Quinone dioxime \$\$ p-Quinone oxime \$\$ Benzoquinone dioxime \$\$

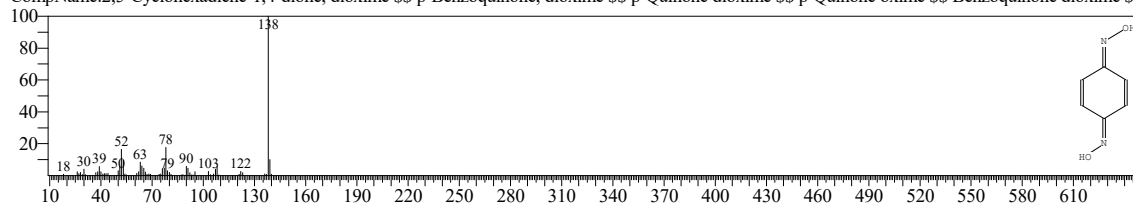

Hit#:2 Entry:137 Library:OA TMS\_DB5\_67min\_V3.lib

SI:32 Formula:C<sub>9</sub>H<sub>14</sub>N<sub>2</sub>O<sub>2</sub>Si CAS:98-92-0 MolWeight:194 RetIndex:1486

CompName:Niacinamide-TMS ; pyridine-3-carboxamide

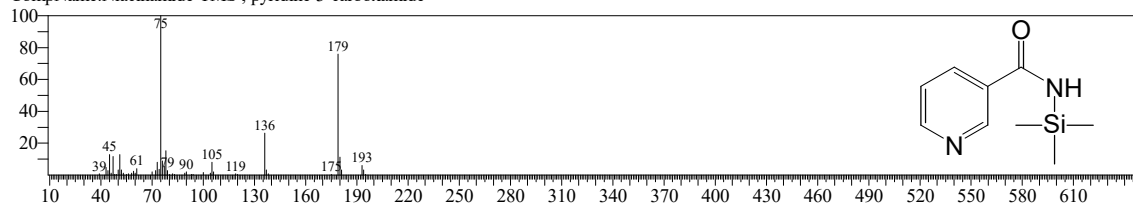

Hit#:3 Entry:21 Library:FA\_ME\_SP2560\_EI\_V3.lib

SI:32 Formula:C<sub>19</sub>H<sub>34</sub>O<sub>2</sub> CAS:60-33-3 MolWeight:294 RetIndex:2775

CompName:Methyl linoleate ; Octadeca-9,12-dienoic acid

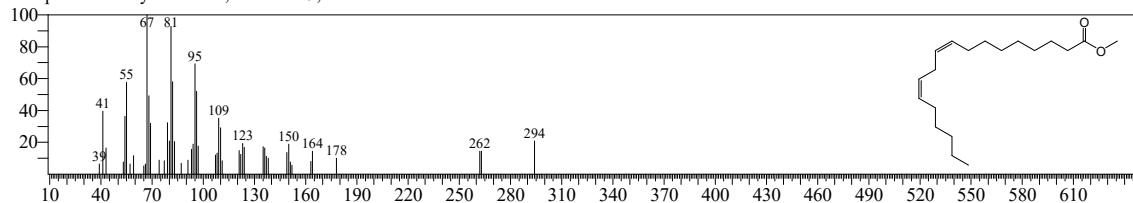

Hit#:4 Entry:34 Library:FA\_ME\_SP2560\_EI\_V3.lib

SI:32 Formula:C<sub>23</sub>H<sub>42</sub>O<sub>2</sub> CAS:7370-49-2 MolWeight:350 RetIndex:3169

CompName:Methyl cis-13,16-Docosadienate ; (13Z,16E)-docosa-13,16-dienoic acid

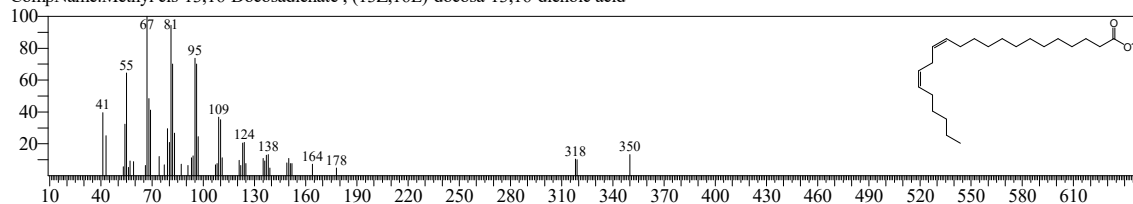

Hit#:5 Entry:20 Library:FA\_ME\_SP2560\_EI\_V3.lib

SI:32 Formula:C<sub>19</sub>H<sub>34</sub>O<sub>2</sub> CAS:506-21-8 MolWeight:294 RetIndex:2727

CompName:Methyl linolelaidate ; (9E,12E)-octadeca-9,12-dienoic acid

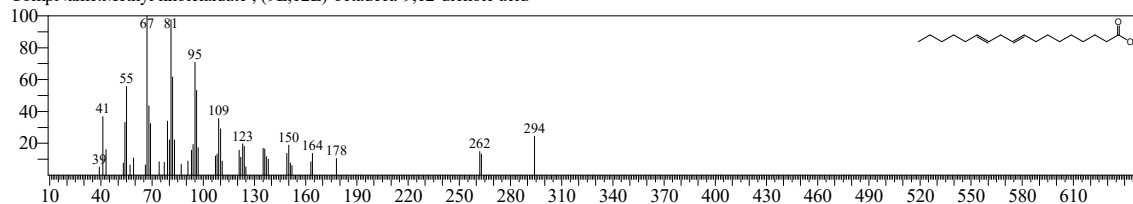

# TNAU

<< Target >>

Line#4 R.Time:12.830(Scan#:1567) MassPeaks:326

RawMode:Averaged 12.825-12.835(1566-1568) BasePeak:138.05(60125)

BG Mode:Calc. from Peak Group 1 - Event 1 Q3 Scan

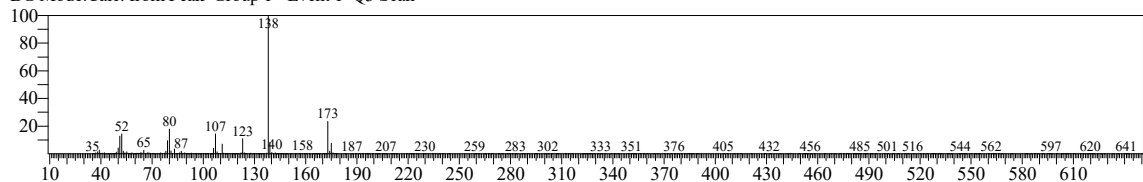

Hit#:1 Entry:11187 Library:NIST20M1.lib

SI:74 Formula:C7H6O3 CAS:533-31-3 MolWeight:138 RetIndex:1245

CompName:1,3-Benzodioxol-5-ol \$\$ Phenol, 3,4-(methylenedioxy)- \$\$ Sesamol \$\$ 3,4-(Methylenedioxy)phenol \$\$ 5-Hydroxy-1,3-benzodioxole \$\$ Methy

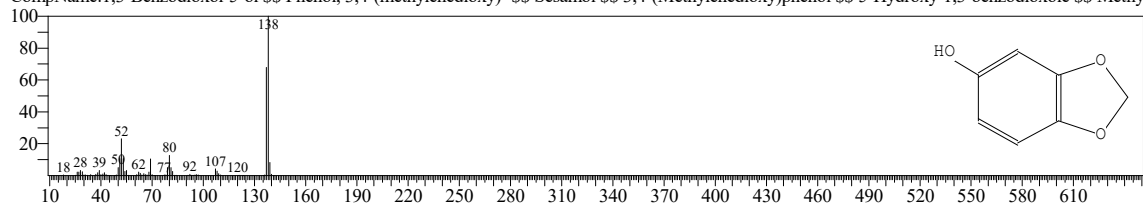

Hit#:2 Entry:8360 Library:NIST20R.lib

SI:73 Formula:C6H6N2O2 CAS:105-11-3 MolWeight:138 RetIndex:1349

CompName:2,5-Cyclohexadiene-1,4-dione, dioxime \$\$ p-Benzoquinone, dioxime \$\$ p-Quinone dioxime \$\$ p-Quinone oxime \$\$ Benzoquinone dioxime \$\$

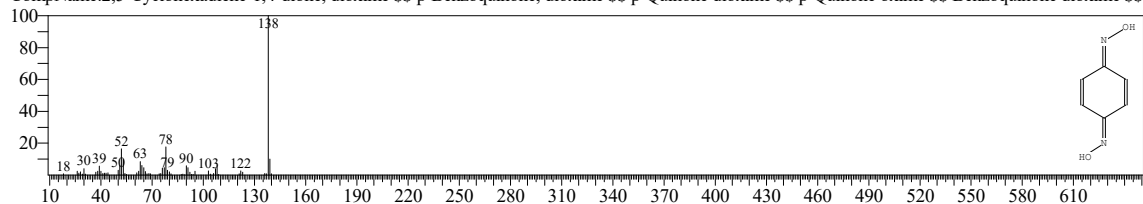

Hit#:3 Entry:11188 Library:NIST20M1.lib

SI:72 Formula:C7H6O3 CAS:69393-72-2 MolWeight:138 RetIndex:1245

CompName:2,3-Methylenedioxyphenol \$\$ 1,3-Benzodioxol-4-ol #

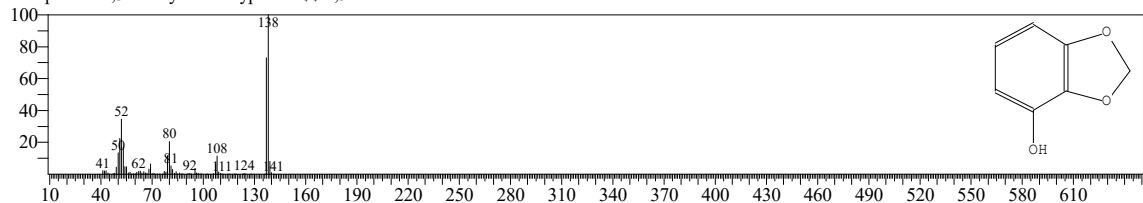

Hit#:4 Entry:8422 Library:NIST20R.lib

SI:71 Formula:C7H10N2O CAS:25680-58-4 MolWeight:138 RetIndex:1070

CompName:2-Ethyl-3-methoxypyrazine \$\$ 2-Methoxy-3-ethylpyrazine \$\$ Pyrazine, 2-ethyl-3-methoxy- \$\$ 3-Ethyl-2-methoxypyrazine \$\$ Pyrazine, 3-ethyl-

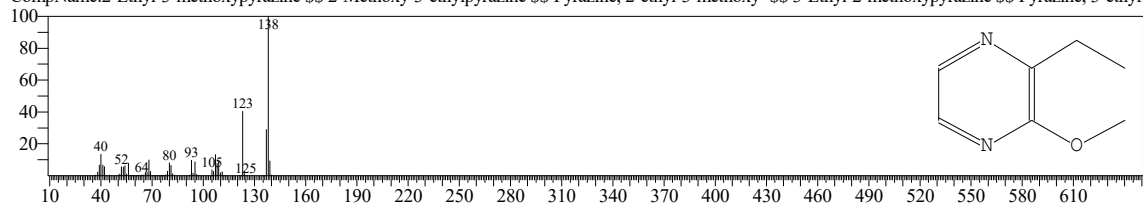

Hit#:5 Entry:11222 Library:NIST20M1.lib

SI:71 Formula:C7H10N2O CAS:3471-32-7 MolWeight:138 RetIndex:1325

CompName:Hydrazine, (4-methoxyphenyl)- \$\$ (p-Methoxyphenyl)hydrazine \$\$ 1-(4-Methoxyphenyl)hydrazine #

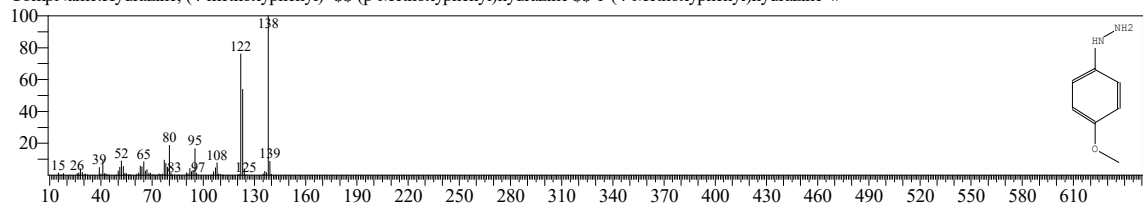

# TNAU

<< Target >>

Line#:5 R.Time:13.355(Scan#:1672) MassPeaks:344

RawMode:Averaged 13.350-13.360(1671-1673) BasePeak:155.05(57054)

BG Mode:Calc. from Peak Group 1 - Event 1 Q3 Scan

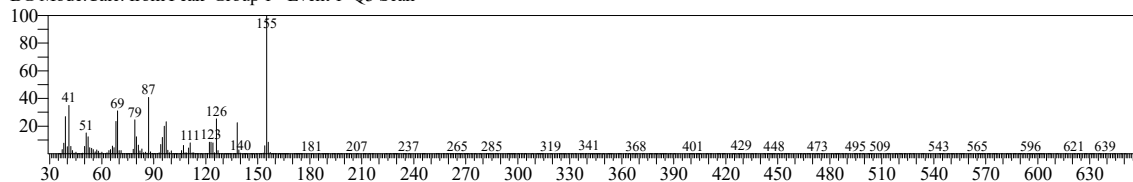

Hit#:1 Entry:34 Library:FA\_ME\_SP2560\_EI\_V3.lib

SI:53 Formula:C23H42O2 CAS:7370-49-2 MolWeight:350 RetIndex:3169

CompName:Methyl cis-13,16-Docosadienate ; (13Z,16E)-docosa-13,16-dienoic acid

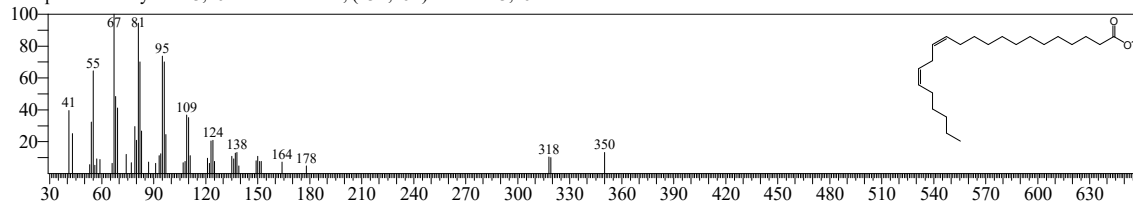

Hit#:2 Entry:21 Library:FA\_ME\_SP2560\_EI\_V3.lib

SI:52 Formula:C19H34O2 CAS:60-33-3 MolWeight:294 RetIndex:2775

CompName:Methyl linoleate ; Octadeca-9,12-dienoic acid

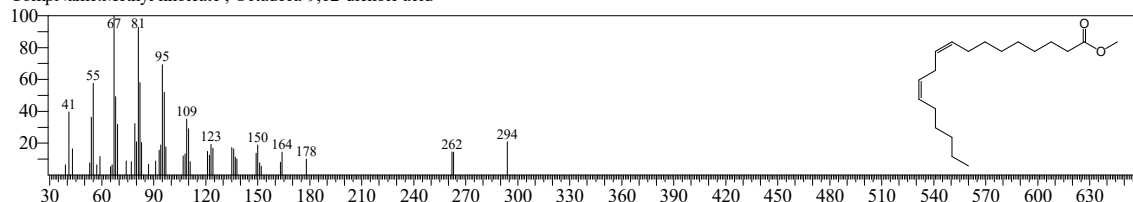

Hit#:3 Entry:20 Library:FA\_ME\_SP2560\_EI\_V3.lib

SI:52 Formula:C19H34O2 CAS:506-21-8 MolWeight:294 RetIndex:2727

CompName:Methyl linolelaidate ; (9E,12E)-octadeca-9,12-dienoic acid

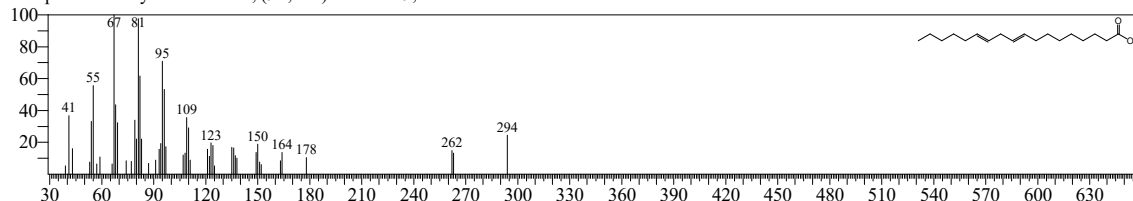

Hit#:4 Entry:11 Library:FA\_ME\_SP2560\_EI\_V3.lib

SI:52 Formula:C16H30O2 CAS:84743-29-3 MolWeight:254 RetIndex:2388

CompName:Methyl cis-10-pentadecenoate ; (Z)-pentadec-10-enoic acid

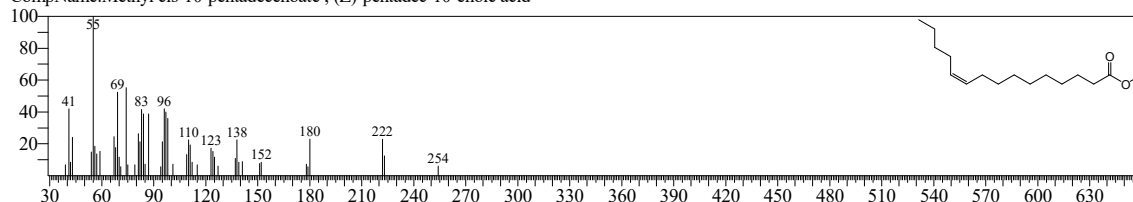

Hit#:5 Entry:27 Library:FA\_ME\_SP2560\_EI\_V3.lib

SI:51 Formula:C21H38O2 CAS:2091-39-6 MolWeight:322 RetIndex:2973

CompName:Methyl cis-11,14-Icosadienoate ; ; Icosa-11,14-dienoic acid

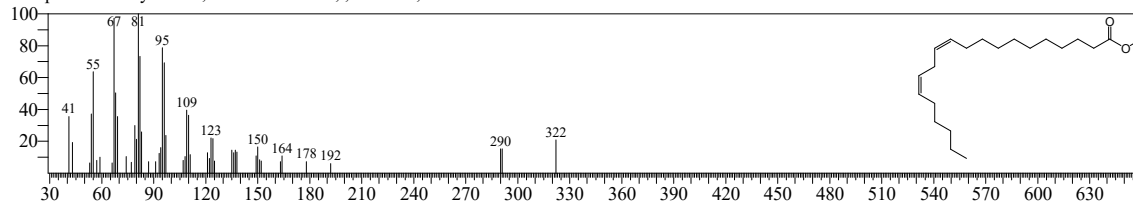

# TNAU

<< Target >>

Line#6 R.Time:13.540(Scan#:1709) MassPeaks:327

RawMode:Averaged 13.535-13.545(1708-1710) BasePeak:155.05(53009)

BG Mode:Calc. from Peak Group 1 - Event 1 Q3 Scan

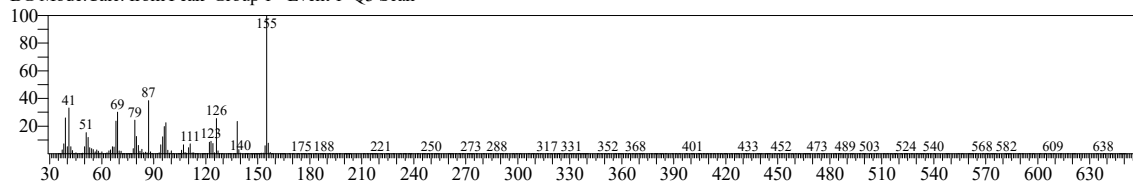

Hit#:1 Entry:34 Library:FA\_ME\_SP2560\_EI\_V3.lib

SI:53 Formula:C23H42O2 CAS:7370-49-2 MolWeight:350 RetIndex:3169

CompName:Methyl cis-13,16-Docosadienate ; (13Z,16E)-docosa-13,16-dienoic acid



Hit#:2 Entry:21 Library:FA\_ME\_SP2560\_EI\_V3.lib

SI:52 Formula:C19H34O2 CAS:60-33-3 MolWeight:294 RetIndex:2775

CompName:Methyl linoleate ; Octadeca-9,12-dienoic acid



Hit#:3 Entry:20 Library:FA\_ME\_SP2560\_EI\_V3.lib

SI:51 Formula:C19H34O2 CAS:506-21-8 MolWeight:294 RetIndex:2727

CompName:Methyl linolelaidate ; (9E,12E)-octadeca-9,12-dienoic acid



Hit#:4 Entry:27 Library:FA\_ME\_SP2560\_EI\_V3.lib

SI:51 Formula:C21H38O2 CAS:2091-39-6 MolWeight:322 RetIndex:2973

CompName:Methyl cis-11,14-Icosadienoate ; Icosa-11,14-dienoic acid

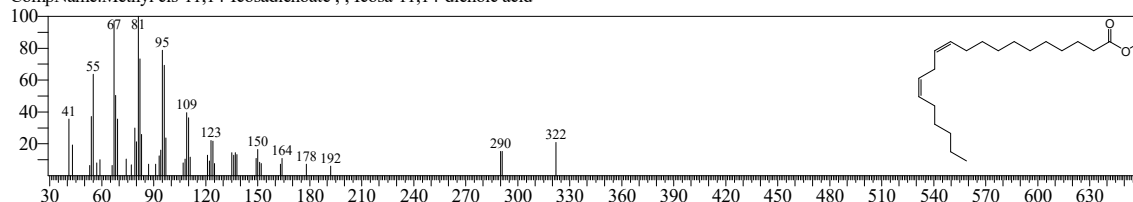

Hit#:5 Entry:11 Library:FA\_ME\_SP2560\_EI\_V3.lib

SI:51 Formula:C16H30O2 CAS:84743-29-3 MolWeight:254 RetIndex:2388

CompName:Methyl cis-10-pentadecenoate ; (Z)-pentadec-10-enoic acid

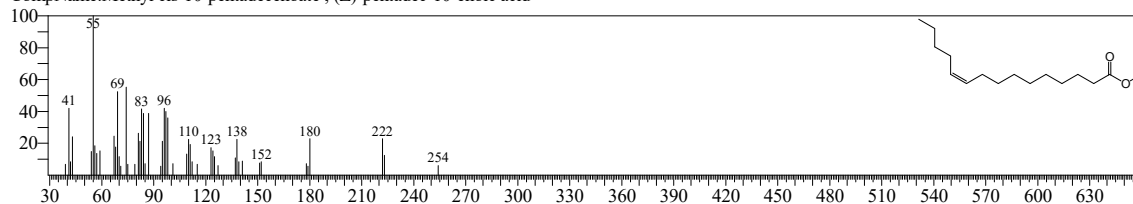

# TNAU

<< Target >>

Line#:7 R.Time:18.075(Scan#:2616) MassPeaks:408

RawMode:Averaged 18.070-18.080(2615-2617) BasePeak:60.00(4336)

BG Mode:Calc. from Peak Group 1 - Event 1 Q3 Scan

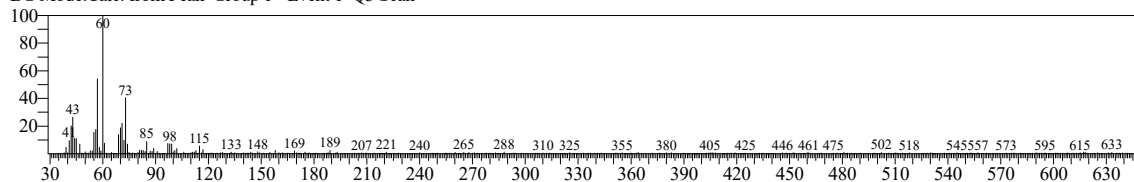

Hit#:1 Entry:13905 Library:NIST20R.lib

SI:91 Formula:C6H10O5 CAS:498-07-7 MolWeight:162 RetIndex:1404

CompName:.beta.-D-Glucopyranose, 1,6-anhydro- \$\$ Anhydro-d-mannosan \$\$ Levoglucosan \$\$ 1,6-Anhydro-.beta.-D-glucopyranose \$\$ 1,6-Anhydro-beta-

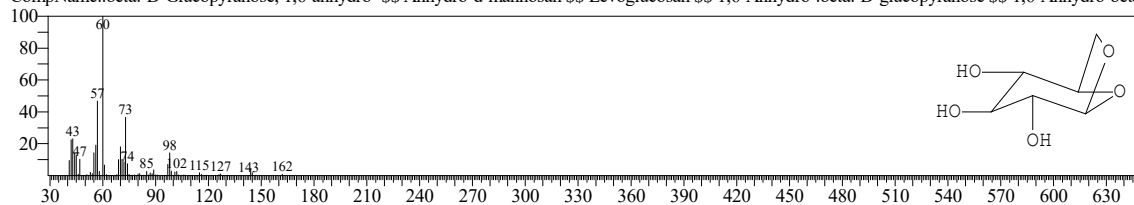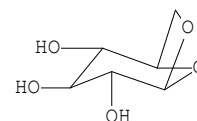

Hit#:2 Entry:36240 Library:NIST20M1.lib

SI:89 Formula:C6H12O6 CAS:2595-97-3 MolWeight:180 RetIndex:1698

CompName:D-Allose \$\$ .beta.-D-Allose \$\$ Hexose #

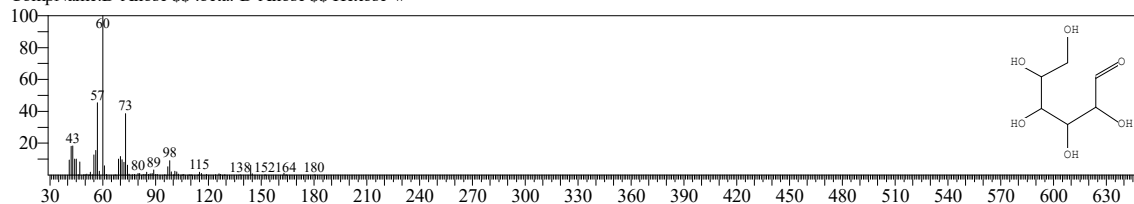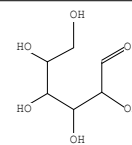

Hit#:3 Entry:23808 Library:NIST20M1.lib

SI:88 Formula:C6H10O5 CAS:0-00-0 MolWeight:162 RetIndex:1400

CompName:3,4-Altrosan \$\$ 3,4-Anhydrohexopyranose #

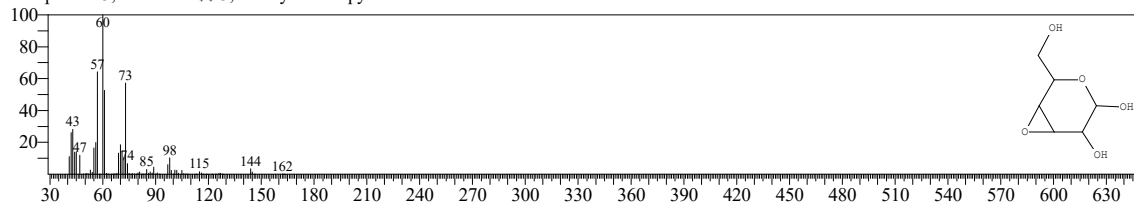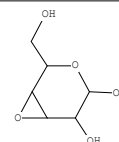

Hit#:4 Entry:23812 Library:NIST20M1.lib

SI:88 Formula:C6H10O5 CAS:0-00-0 MolWeight:162 RetIndex:1404

CompName:1,6-Anhydro-.beta.-d-talopyranose

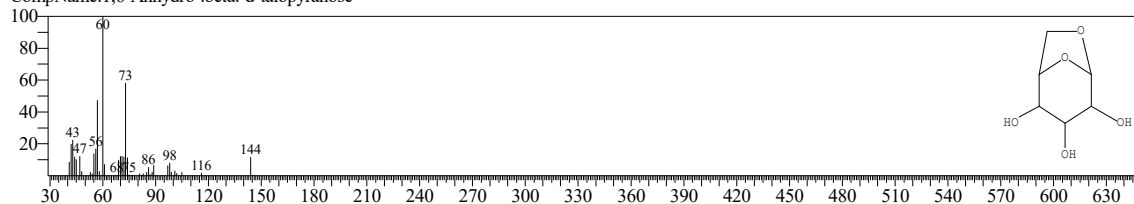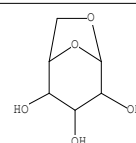

Hit#:5 Entry:62131 Library:NIST20M1.lib

SI:84 Formula:C7H14O7 CAS:0-00-0 MolWeight:210 RetIndex:2031

CompName:d-Gluco-heptulosan \$\$ Hept-2-ulopyranose #

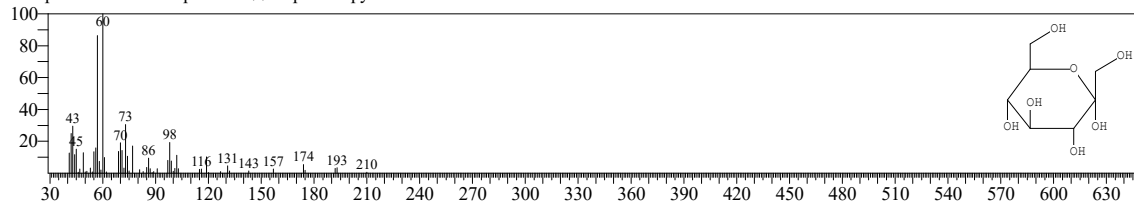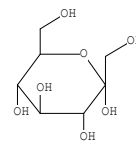



# TNAU

<< Target >>

Line# 8 R.Time:19.195(Scan#:2840) MassPeaks:308

RawMode:Averaged 19.190-19.200(2839-2841) BasePeak:263.15(6819)

BG Mode:Calc. from Peak Group 1 - Event 1 Q3 Scan

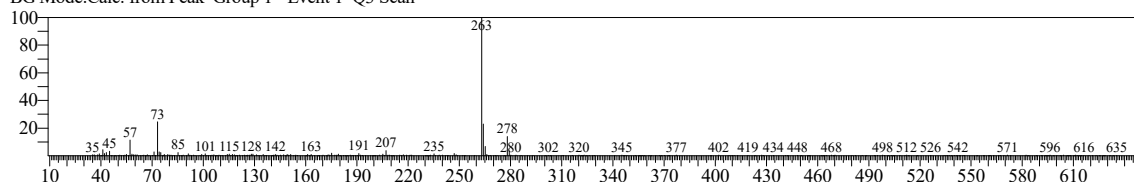

Hit#:1 Entry:137399 Library:NIST20M1.lib

SI:90 Formula:C17H30OSi CAS:53925-65-8 MolWeight:278 RetIndex:1632

CompName:2,4-Di-tert-butylphenoxytrimethylsilane \$ \$ Benzene, 2,4-bis(1,1-dimethylethyl)-1-[(trimethylsilyl)oxy]- \$ \$ Silane, [2,4-bis(1,1-dimethylethyl)ph

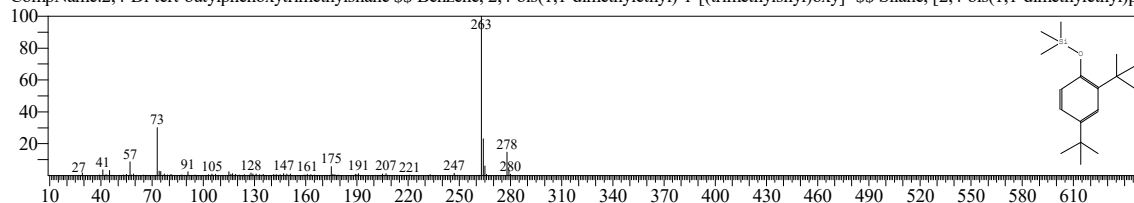

Hit#:2 Entry:136557 Library:NIST20M1.lib

SI:82 Formula:C12H22N4Si2 CAS:0-00-0 MolWeight:278 RetIndex:1703

CompName:3-Deazaadenine, 2TMS \$ \$ 3-Deazaadenine, N,N'-bis-TMS \$ \$ 1H-Imidazo[4,5-c]pyridin-4-amine, N,N'-bis-TMS

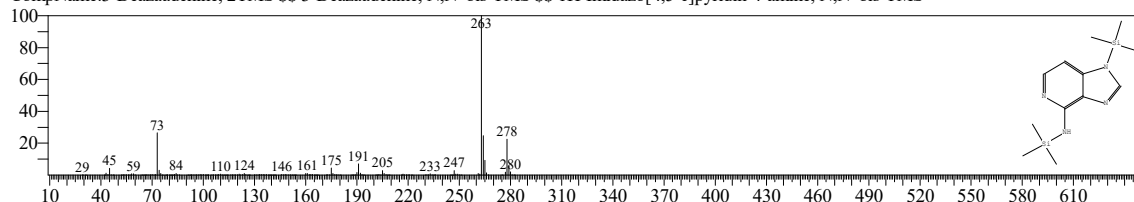

Hit#:3 Entry:33871 Library:NIST20R.lib

SI:81 Formula:C17H30OSi CAS:10416-73-6 MolWeight:278 RetIndex:1632

CompName:2,6-Bis(tert-butyl)phenol, TMS derivative \$ \$ Trimethyl(2,6 di-tert-butylphenoxy)silane \$ \$ (2,6-Di-tert-butylphenoxy)(trimethyl)silane #

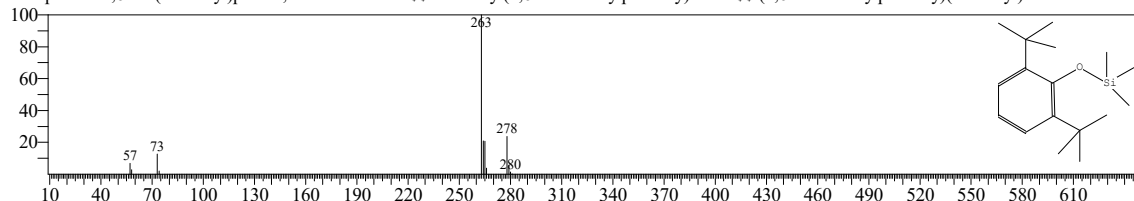

Hit#:4 Entry:137020 Library:NIST20M1.lib

SI:80 Formula:C15H22O3Si CAS:0-00-0 MolWeight:278 RetIndex:1736

CompName:6-Methoxy-2,2-dimethyl-2,3-dihydro-4H-chromen-4-one, TMS \$ \$ 6-Methoxy-2,2-dimethyl-chroman-4-one, O-trimethylsilyl- \$ \$ 4H-1-Benzopy

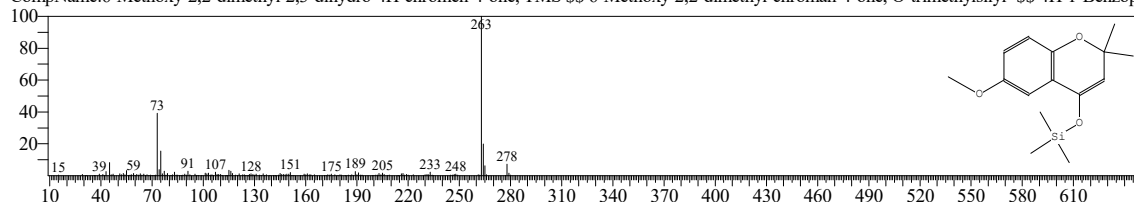

Hit#:5 Entry:187408 Library:NIST20M1.lib

SI:77 Formula:C19H32O2Si CAS:959040-62-1 MolWeight:320 RetIndex:1865

CompName:Ibuprofen, TBDMS derivative \$ \$ Ibuprofen, tert-butyl dimethylsilyl ester

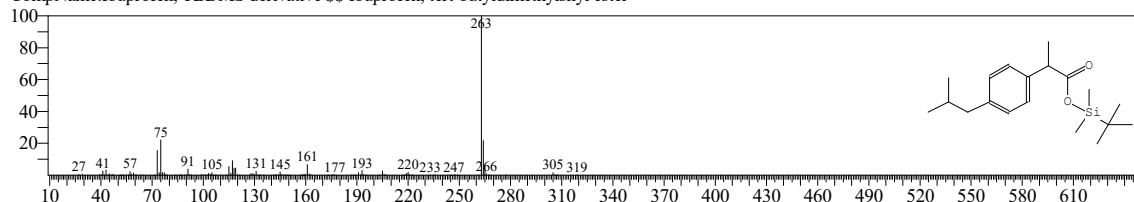

# TNAU

<< Target >>

Line#9 R.Time:28.305(Scan#:4662) MassPeaks:360

RawMode:Averaged 28.300-28.310(4661-4663) BasePeak:73.05(8727)

BG Mode:Calc. from Peak Group 1 - Event 1 Q3 Scan

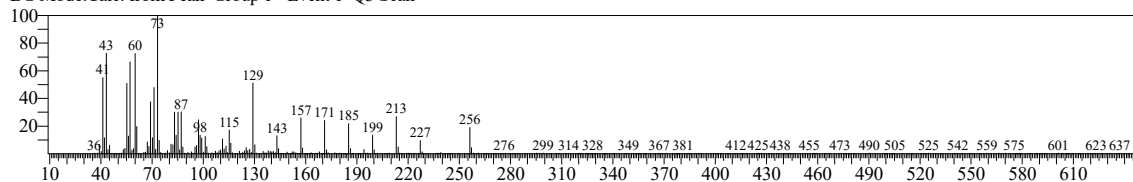

Hit#1 Entry:31600 Library:NIST20R.lib

SI:95 Formula:C16H32O2 CAS:57-10-3 MolWeight:256 RetIndex:1968

CompName:n-Hexadecanoic acid \$ Hexadecanoic acid \$ n-Hexadecic acid \$ Palmitic acid \$ Pentadecanecarboxylic acid \$ 1-Pentadecanecarboxylic

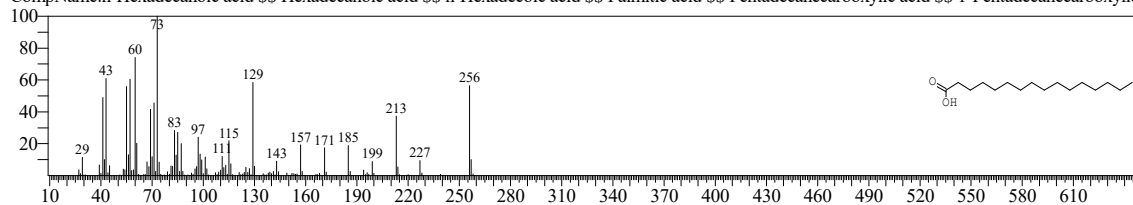

Hit#2 Entry:29890 Library:NIST20R.lib

SI:91 Formula:C15H30O2 CAS:1002-84-2 MolWeight:242 RetIndex:1869

CompName:Pentadecanoic acid \$ Pentadecylic acid \$ n-Pentadecanoic acid \$ n-Pentadecylic acid

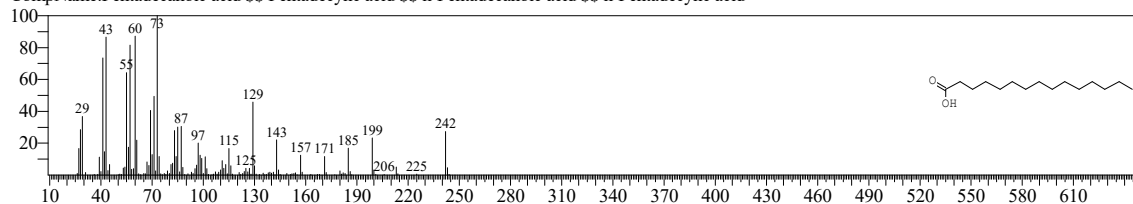

Hit#3 Entry:44286 Library:NIST20M2.lib

SI:91 Formula:C38H68O8 CAS:28474-90-0 MolWeight:652 RetIndex:4765

CompName:l-(+)-Ascorbic acid 2,6-dihexadecanoate

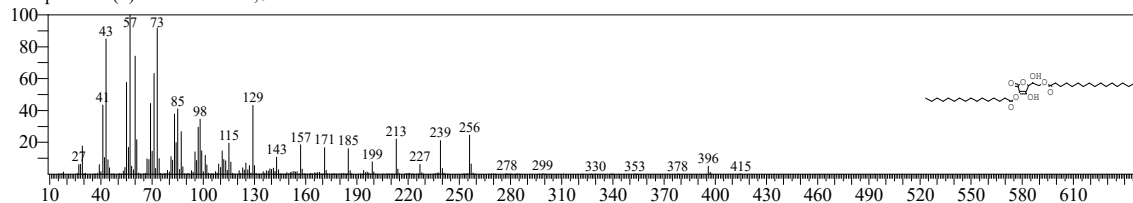

Hit#4 Entry:25643 Library:NIST20R.lib

SI:90 Formula:C13H26O2 CAS:638-53-9 MolWeight:214 RetIndex:1670

CompName:Tridecanoic acid \$ n-Tridecanoic acid \$ n-Tridecoic acid \$ Tridecylic acid

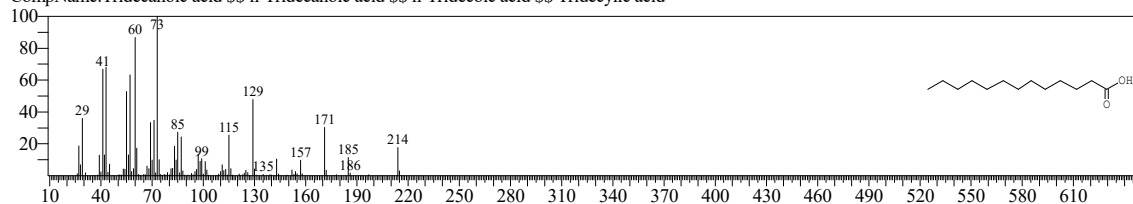

Hit#5 Entry:144781 Library:NIST20M1.lib

SI:89 Formula:C18H36O2 CAS:57-11-4 MolWeight:284 RetIndex:2167

CompName:Octadecanoic acid \$ Stearic acid \$ n-Octadecanoic acid \$ Humko Industriene R \$ Hydrofol Acid 150 \$ Hystrene S-97 \$ Hystrene T-70 \$

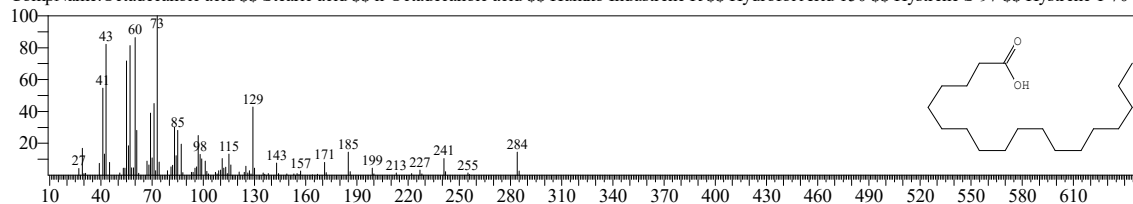

# TNAU

<< Target >>

Line#:10 R.Time:31.475(Scan#:5296) MassPeaks:349

RawMode:Averaged 31.470-31.480(5295-5297) BasePeak:67.05(4249)

BG Mode:Calc. from Peak Group 1 - Event 1 Q3 Scan

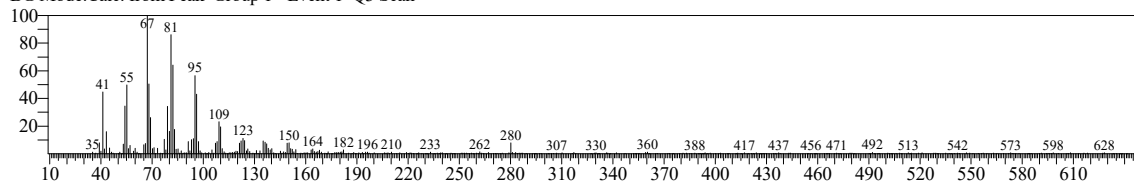

Hit#:1 Entry:34035 Library:NIST20R.lib

SI:95 Formula:C18H32O2 CAS:60-33-3 MolWeight:280 RetIndex:2183

CompName:9,12-Octadecadienoic acid (Z,Z)- \$\$ cis-9,cis-12-Octadecadienoic acid \$\$ cis,cis-Linoleic acid \$\$ Grape seed oil \$\$ Linoleic acid \$

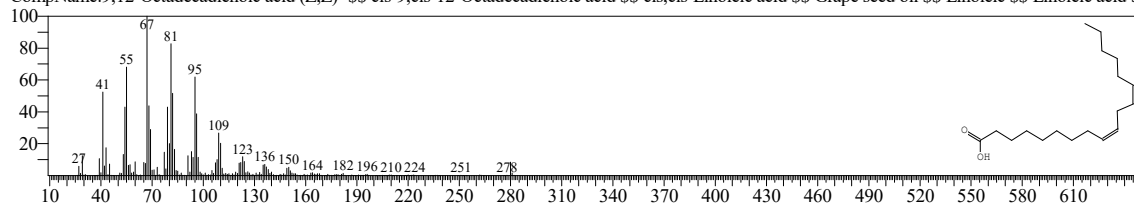

Hit#:2 Entry:139651 Library:NIST20M1.lib

SI:95 Formula:C18H32O2 CAS:544-71-8 MolWeight:280 RetIndex:2183

CompName:(9E,11E)-Octadecadienoic acid

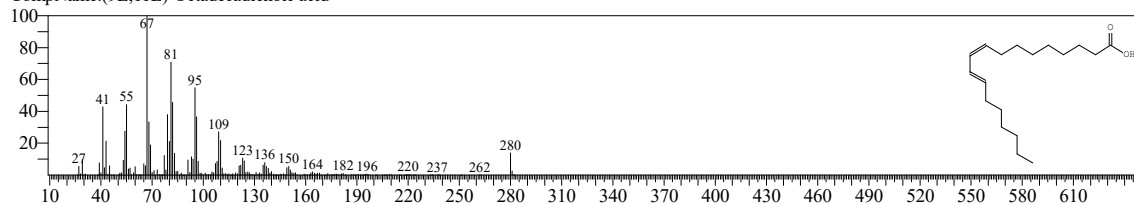

Hit#:3 Entry:139646 Library:NIST20M1.lib

SI:95 Formula:C18H32O2 CAS:2420-56-6 MolWeight:280 RetIndex:2183

CompName:10E,12Z-Octadecadienoic acid

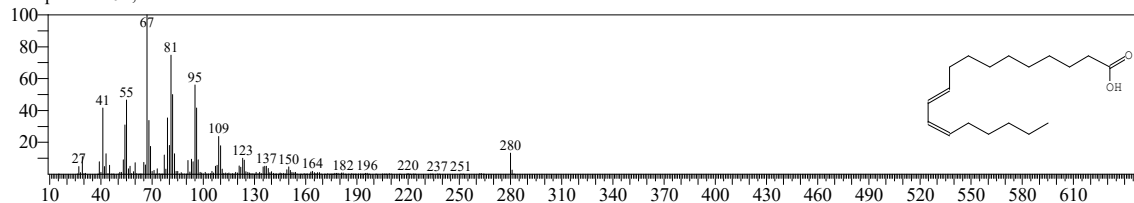

Hit#:4 Entry:139661 Library:NIST20M1.lib

SI:94 Formula:C18H32O2 CAS:506-21-8 MolWeight:280 RetIndex:2183

CompName:Linoelaidic acid

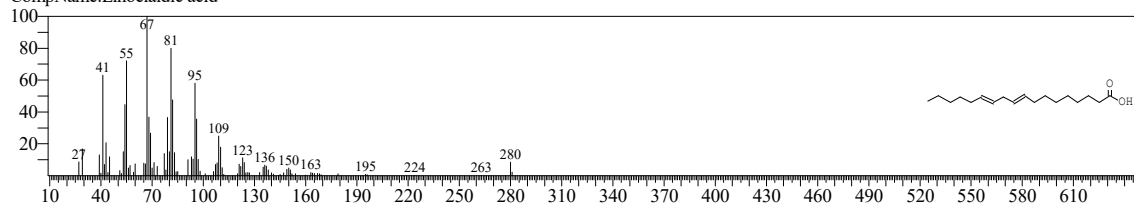

Hit#:5 Entry:173215 Library:NIST20M1.lib

SI:94 Formula:C20H36O2 CAS:2091-39-6 MolWeight:308 RetIndex:2382

CompName:11,14-Eicosadienoic acid

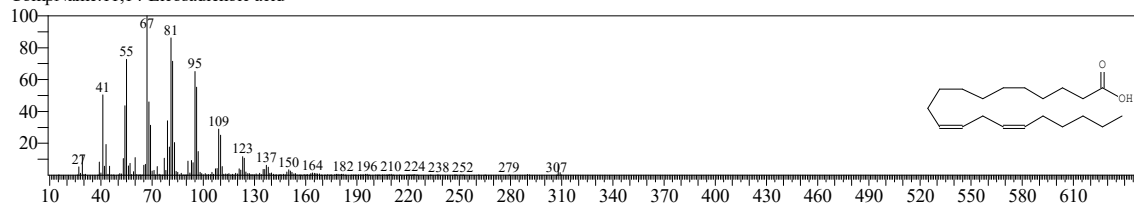

# TNAU

<< Target >>

Line#:11 R.Time:31.585(Scan#:5318) MassPeaks:469

RawMode:Averaged 31.580-31.590(5317-5319) BasePeak:55.05(1923)

BG Mode:Calc. from Peak Group 1 - Event 1 Q3 Scan

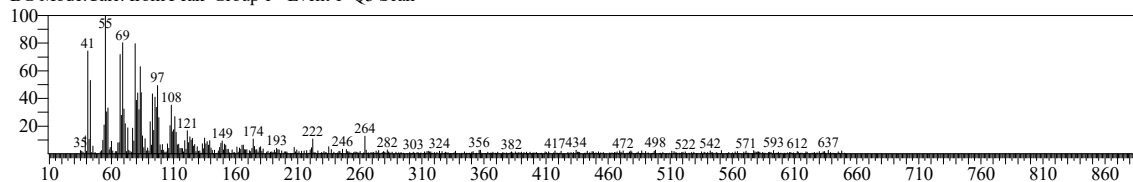

Hit#:1 Entry:92244 Library:NIST20M1.lib

SI:86 Formula:C16H30O CAS:56219-04-6 MolWeight:238 RetIndex:1808

CompName:cis-9-Hexadecenal \$\$ 9-Hexadecenal, (Z)- \$\$ (Z)-9-Hexadecenal \$\$ Z-9-Hexadecenal \$\$ (9Z)-9-Hexadecenal #

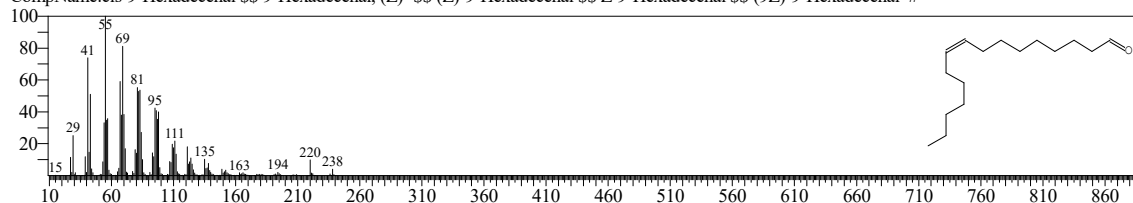

Hit#:2 Entry:205575 Library:NIST20M1.lib

SI:86 Formula:C22H40O2 CAS:69502-96-1 MolWeight:336 RetIndex:2453

CompName:2H-Pyran, 2-(2-heptadecyloxy)tetrahydro- \$\$ 2-(2-Heptadecyloxy)tetrahydro-2H-pyran #

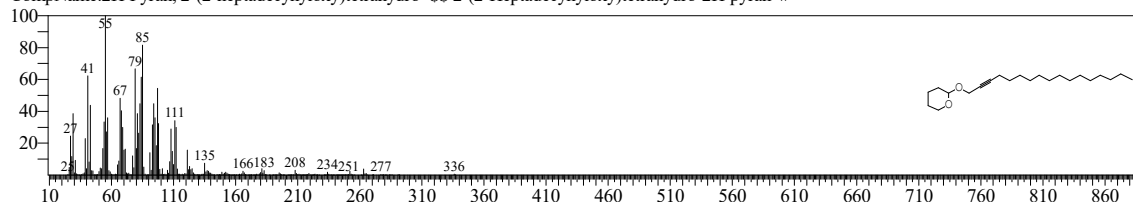

Hit#:3 Entry:63176 Library:NIST20M1.lib

SI:86 Formula:C14H26O CAS:65128-96-3 MolWeight:210 RetIndex:1609

CompName:7-Tetradecenal, (Z)- \$\$ Z-7-Tetradecenal \$\$ (7Z)-7-Tetradecenal #

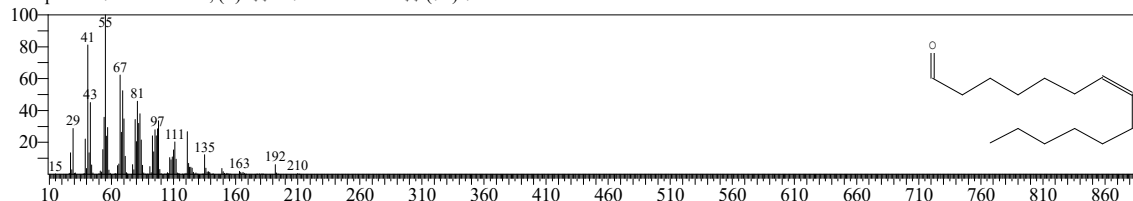

Hit#:4 Entry:123421 Library:NIST20M1.lib

SI:85 Formula:C18H34O CAS:2423-10-1 MolWeight:266 RetIndex:2007

CompName:9-Octadecenal, (Z)- \$\$ Olealdehyde \$\$ cis-9-Octadecenal \$\$ Oleylaldehyde \$\$ Z-9-Octadecenal \$\$ (9Z)-9-Octadecenal #

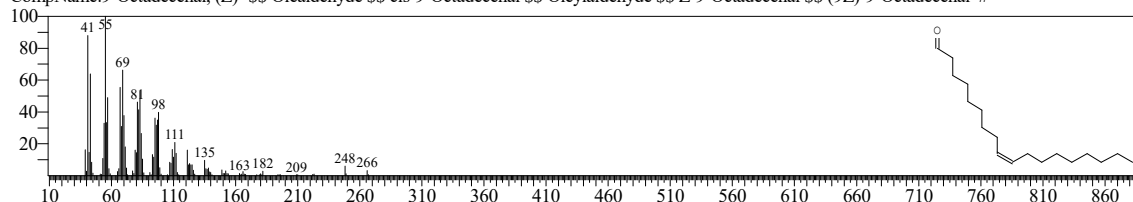

Hit#:5 Entry:46357 Library:NIST20M2.lib

SI:85 Formula:C57H104O6 CAS:537-39-3 MolWeight:884 RetIndex:6149

CompName:9-Octadecenoic acid, 1,2,3-propanetriyl ester, (E,E,E)- \$\$ 2,3-Bis[(9E)-9-octadecenoyloxy]propyl (9E)-9-octadecenoate #

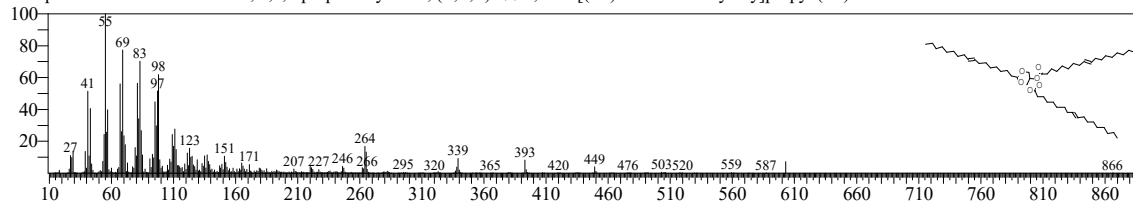

# TNAU

<< Target >>

Line#:12 R.Time:32.040(Scan#:5409) MassPeaks:348

RawMode:Averaged 32.035-32.045(5408-5410) BasePeak:73.05(2398)

BG Mode:Calc. from Peak Group 1 - Event 1 Q3 Scan

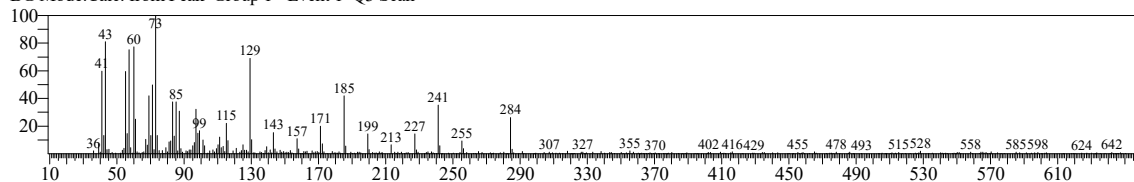

Hit#:1 Entry:34463 Library:NIST20R.lib

SI:93 Formula:C18H36O2 CAS:57-11-4 MolWeight:284 RetIndex:2167

CompName:Octadecanoic acid \$\$ Stearic acid \$\$ n-Octadecanoic acid \$\$ Humko Industriene R \$\$ Hydrofol Acid 150 \$\$ Hystrene S-97 \$\$ Hystrene T-70 \$

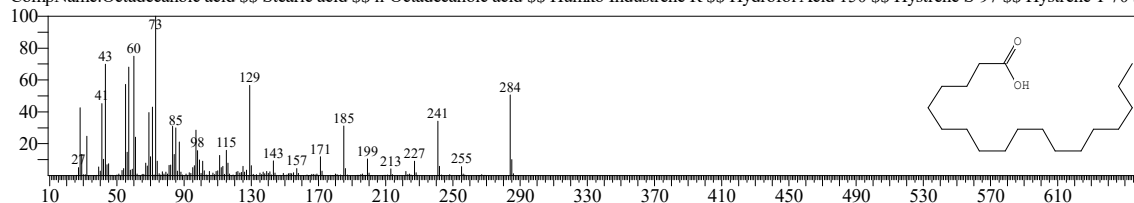

Hit#:2 Entry:29890 Library:NIST20R.lib

SI:89 Formula:C15H30O2 CAS:1002-84-2 MolWeight:242 RetIndex:1869

CompName:Pentadecanoic acid \$\$ Pentadecylic acid \$\$ n-Pentadecanoic acid \$\$ n-Pentadecylic acid

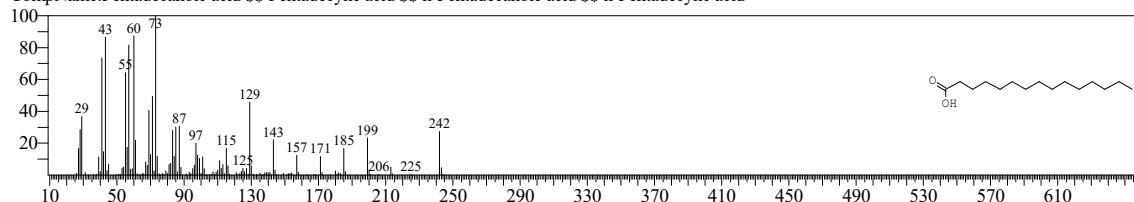

Hit#:3 Entry:44286 Library:NIST20M2.lib

SI:87 Formula:C38H68O8 CAS:28474-90-0 MolWeight:652 RetIndex:4765

CompName:l-(+)-Ascorbic acid 2,6-dihexadecanoate

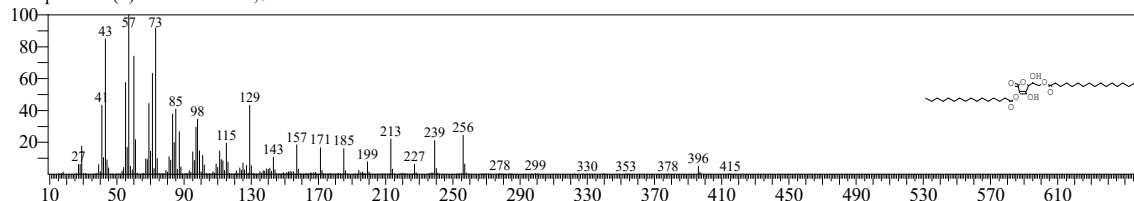

Hit#:4 Entry:31600 Library:NIST20R.lib

SI:87 Formula:C16H32O2 CAS:57-10-3 MolWeight:256 RetIndex:1968

CompName:n-Hexadecanoic acid \$\$ Hexadecanoic acid \$\$ n-Hexadecanoic acid \$\$ Palmitic acid \$\$ Pentadecanecarboxylic acid \$\$ 1-Pentadecanecarboxylic acid

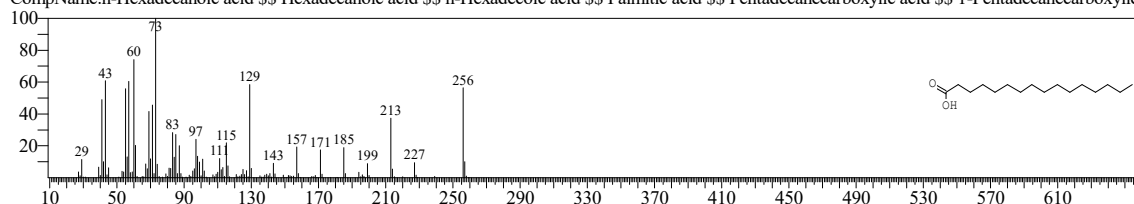

Hit#:5 Entry:36904 Library:NIST20R.lib

SI:86 Formula:C20H40O2 CAS:506-30-9 MolWeight:312 RetIndex:2366

CompName:Eicosanoic acid \$\$ Arachic acid \$\$ Arachidic acid \$\$ Icosanoic acid \$\$ n-Eicosanoic acid \$\$ Arachidic acid (synthetic)

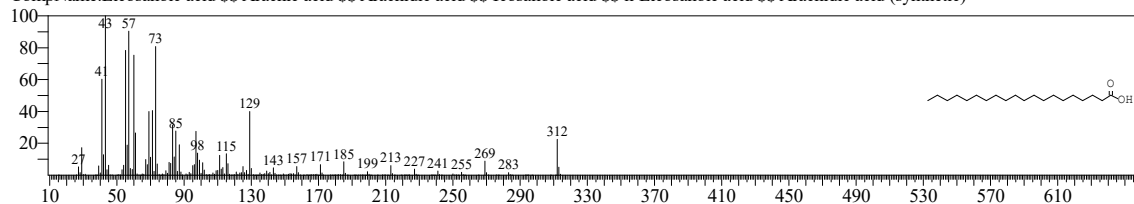

# TNAU

<< Target >>

Line#:13 R.Time:39.070(Scan#:6815) MassPeaks:393

RawMode:Averaged 39.065-39.075(6814-6816) BasePeak:355.00(731)

BG Mode:Calc. from Peak Group 1 - Event 1 Q3 Scan

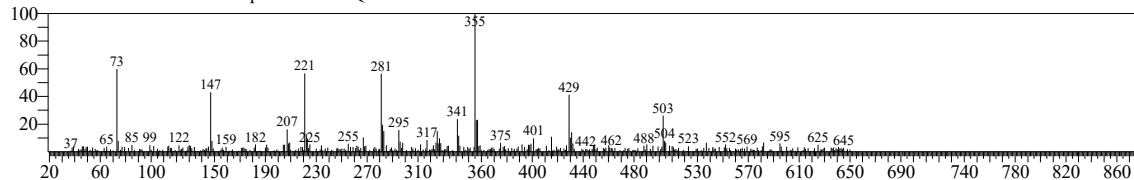

Hit#:1 Entry:46368 Library:NIST20M2.lib

SI:78 Formula:C<sub>24</sub>H<sub>72</sub>O<sub>12</sub>Si<sub>12</sub> CAS:18919-94-3 MolWeight:888 RetIndex:2480

CompName:Tetracosamethyl-cyclododecasiloxane \$\$ 2,2,4,4,6,6,8,8,10,10,12,12,14,14,16,16,18,18,20,20,22,22,24,24-Tetracosamethylcyclododecasiloxane

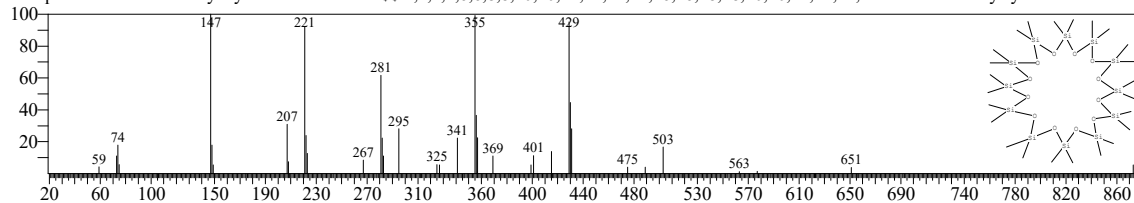

Hit#:2 Entry:45685 Library:NIST20M2.lib

SI:77 Formula:C<sub>20</sub>H<sub>60</sub>O<sub>10</sub>Si<sub>10</sub> CAS:18772-36-6 MolWeight:740 RetIndex:2067

CompName:Cyclodecasiloxane, eicosamethyl- \$\$ 2,2,4,4,6,6,8,8,10,10,12,12,14,14,16,16,18,18,20,20-Icosamethylcyclodecasiloxane # \$\$ Eicosamethyl-cy

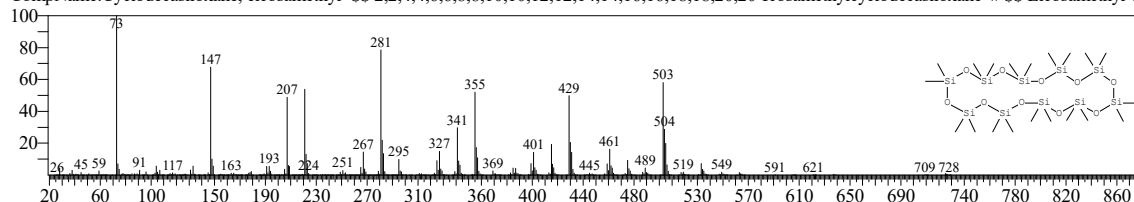

Hit#:3 Entry:44570 Library:NIST20M2.lib

SI:73 Formula:C<sub>18</sub>H<sub>54</sub>O<sub>9</sub>Si<sub>9</sub> CAS:556-71-8 MolWeight:666 RetIndex:1860

CompName:Cyclononasiloxane, octadecamethyl- \$\$ Octadecamethyl-cyclononasiloxane \$\$ 2,2,4,4,6,6,8,8,10,10,12,12,14,14,16,16,18,18-Octadecamethylcy

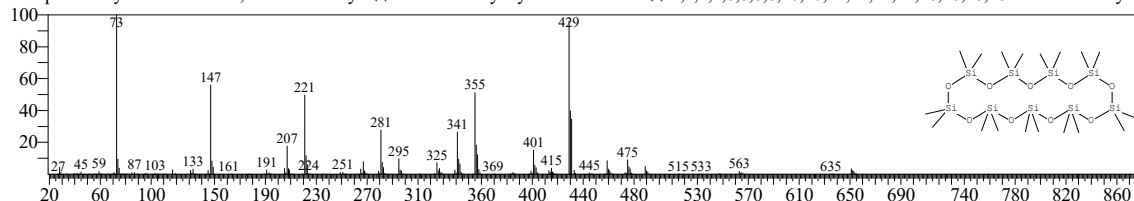

Hit#:4 Entry:43312 Library:NIST20R.lib

SI:70 Formula:C<sub>16</sub>H<sub>48</sub>O<sub>6</sub>Si<sub>7</sub> CAS:541-01-5 MolWeight:532 RetIndex:1437

CompName:Heptasiloxane, hexadecamethyl- \$\$ Hexadecamethylheptasiloxane \$\$ 1,1,1,3,3,5,5,7,7,9,9,11,11,13,13,13-Hexadecamethylheptasiloxane #

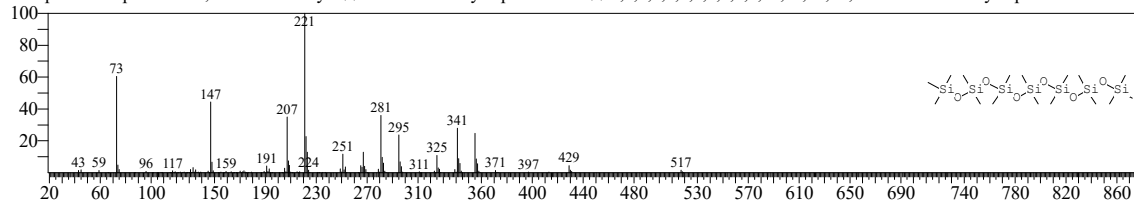

Hit#:5 Entry:402 Library:OA TMS DB5 67min V3.lib

SI:57 Formula:C<sub>20</sub>H<sub>42</sub>O<sub>4</sub>Si<sub>4</sub> CAS:775-01-9 MolWeight:458 RetIndex:1942

CompName:3,4-Dihydroxymandelic acid-4TMS ; 2-(3,4-dihydroxyphenyl)-2-hydroxyacetic acid

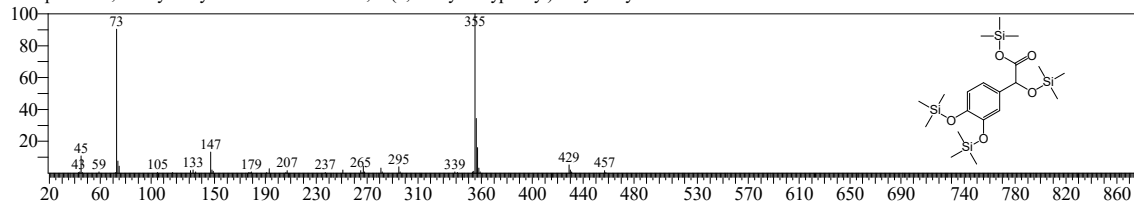

# TNAU

<< Target >>

Line#:14 R.Time:39.905(Scan#:6982) MassPeaks:312

RawMode:Averaged 39.900-39.910(6981-6983) BasePeak:149.00(6048)

BG Mode:Calc. from Peak Group 1 - Event 1 Q3 Scan

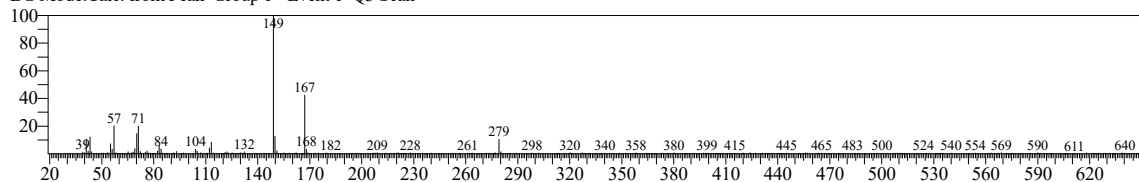

Hit#:1 Entry:41263 Library:NIST20R.lib

SI:94 Formula:C<sub>24</sub>H<sub>38</sub>O<sub>4</sub> CAS:117-81-7 MolWeight:390 RetIndex:2704

CompName:Bis(2-ethylhexyl) phthalate \$\$ Phthalic acid, bis(2-ethylhexyl) ester \$\$ Bis(2-ethylhexyl) 1,2-benzenedicarboxylate \$\$ Bisoflex 81 \$\$ Compound

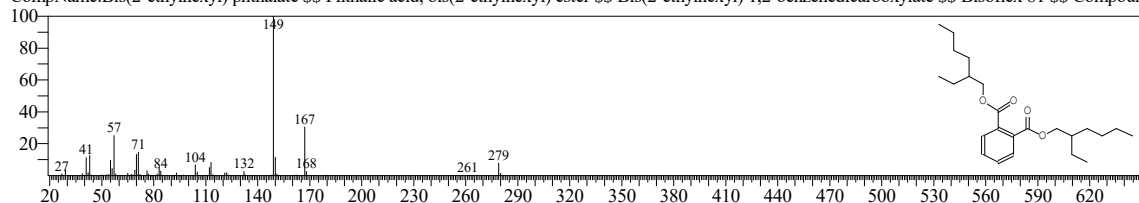

Hit#:2 Entry:254434 Library:NIST20M1.lib

SI:92 Formula:C<sub>24</sub>H<sub>38</sub>O<sub>4</sub> CAS:0-00-0 MolWeight:390 RetIndex:2704

CompName:Phthalic acid, di(2-propylpentyl) ester

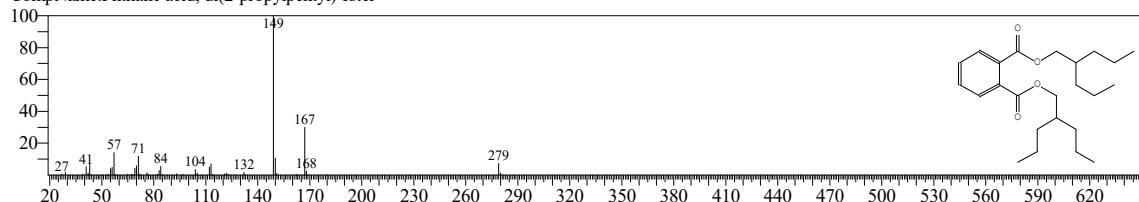

Hit#:3 Entry:254360 Library:NIST20M1.lib

SI:91 Formula:C<sub>24</sub>H<sub>38</sub>O<sub>4</sub> CAS:0-00-0 MolWeight:390 RetIndex:2575

CompName:Phthalic acid, di(6-methylhept-2-yl) ester

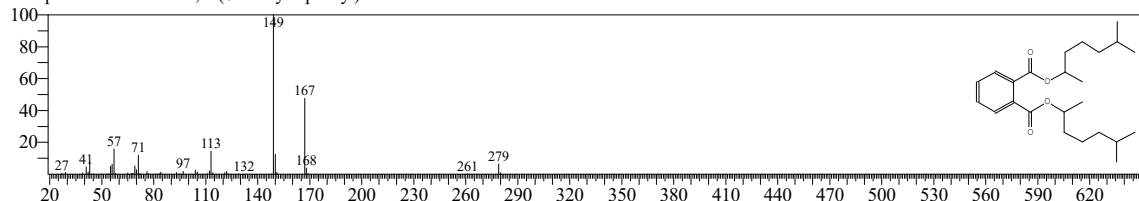

Hit#:4 Entry:10247 Library:NIST20M2.lib

SI:89 Formula:C<sub>26</sub>H<sub>42</sub>O<sub>4</sub> CAS:0-00-0 MolWeight:418 RetIndex:2838

CompName:Phthalic acid, 6-ethyloct-3-yl 2-ethylhexyl ester

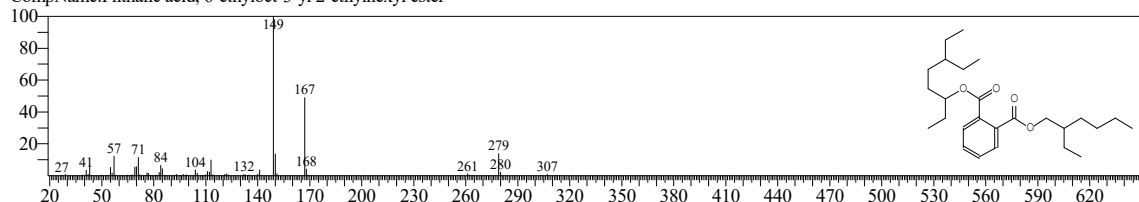

Hit#:5 Entry:254424 Library:NIST20M1.lib

SI:87 Formula:C<sub>24</sub>H<sub>38</sub>O<sub>4</sub> CAS:0-00-0 MolWeight:390 RetIndex:2704

CompName:Phthalic acid, di(oct-3-yl) ester

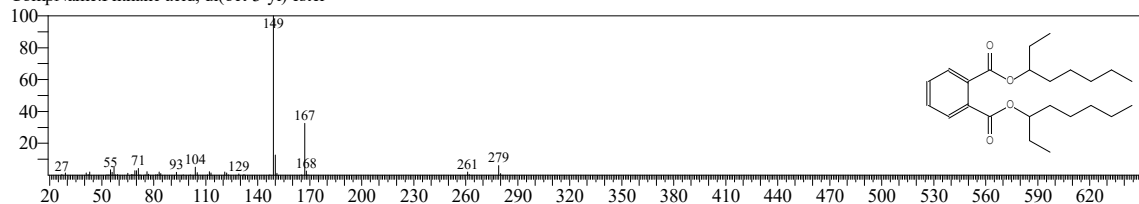

# TNAU

<< Target >>

Line#:15 R.Time:41.590(Scan#:7319) MassPeaks:365

RawMode:Averaged 41.585-41.595(7318-7320) BasePeak:355.05(1110)

BG Mode:Calc. from Peak Group 1 - Event 1 Q3 Scan

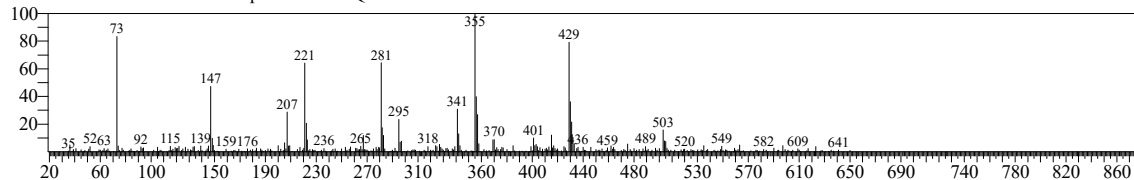

Hit#:1 Entry:46368 Library:NIST20M2.lib

SI:83 Formula:C24H72O12Si12 CAS:18919-94-3 MolWeight:888 RetIndex:2480

CompName:Tetracosamethylcyclododecasiloxane \$\$ 2,2,4,4,6,6,8,8,10,10,12,12,14,14,16,16,18,18,20,20,22,22,24,24-Tetracosamethylcyclododecasiloxane



Hit#:2 Entry:44570 Library:NIST20M2.lib

SI:81 Formula:C18H54O9Si9 CAS:556-71-8 MolWeight:666 RetIndex:1860

CompName:Cyclononasiloxane, octadecamethyl- \$\$ Octadecamethyl-cyclononasiloxane \$\$ 2,2,4,4,6,6,8,8,10,10,12,12,14,14,16,16,18,18-Octadecamethyl-

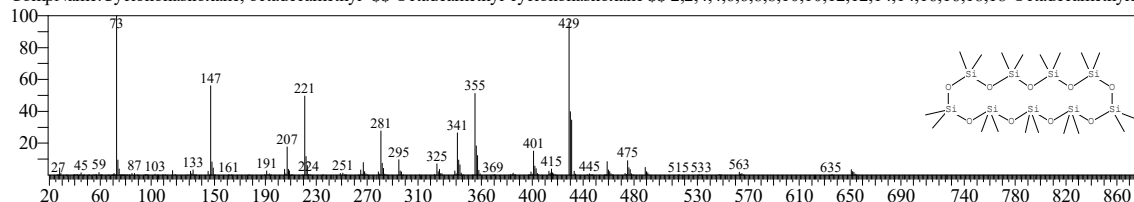

Hit#:3 Entry:45685 Library:NIST20M2.lib

SI:79 Formula:C20H60O10Si10 CAS:18772-36-6 MolWeight:740 RetIndex:2067

CompName:Cyclodecasiloxane, eicosamethyl- \$\$ 2,2,4,4,6,6,8,8,10,10,12,12,14,14,16,16,18,18,20-Icosamethylcyclodecasiloxane # \$\$ Eicosamethyl-cy

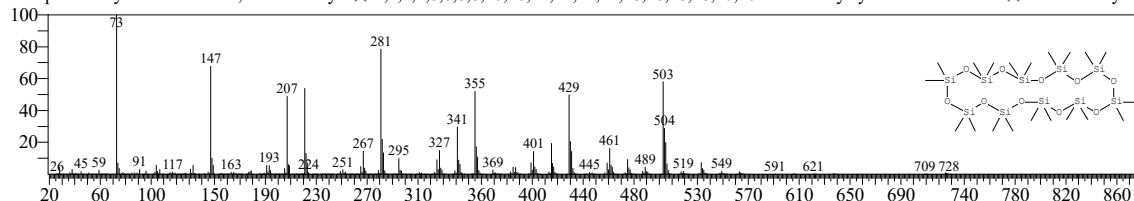

Hit#:4 Entry:42942 Library:NIST20M2.lib

SI:72 Formula:C18H54O7Si8 CAS:556-69-4 MolWeight:606 RetIndex:1622

CompName:1,1,1,3,3,5,5,7,7,9,9,11,11,13,13,15,15,15-octadecamethyloctasiloxane \$\$ Polydimethylsilane Oil

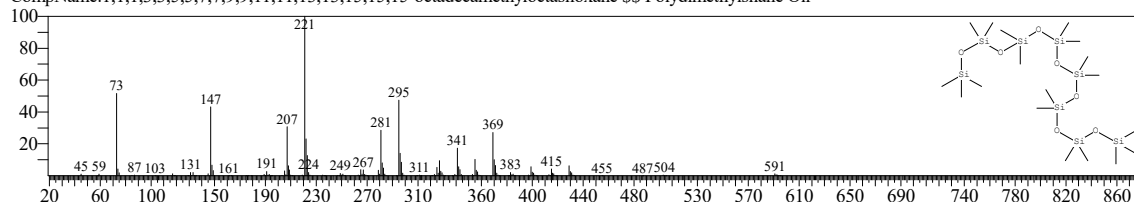

Hit#:5 Entry:45794 Library:NIST20M2.lib

SI:71 Formula:C22H66O9Si10 CAS:556-70-7 MolWeight:754 RetIndex:1991

CompName:1,1,1,3,3,5,5,7,7,9,9,11,11,13,13,15,15,17,17,19,19,19-docosamethyldecasiloxane \$\$ Polydimethylsilane Oil

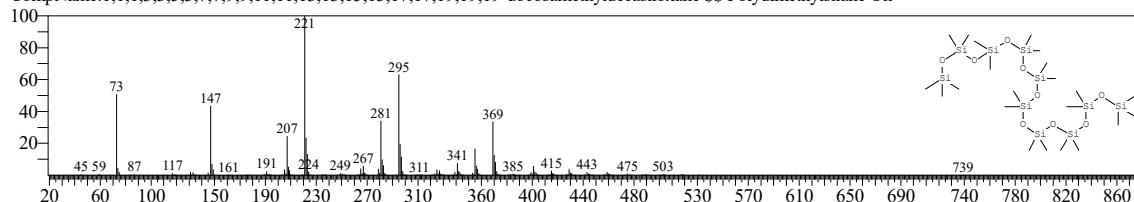



# TNAU

<< Target >>

Line#:16 R.Time:43.800(Scan#:7761) MassPeaks:357

RawMode:Averaged 43.795-43.805(7760-7762) BasePeak:355.10(1014)

BG Mode:Calc. from Peak Group 1 - Event 1 Q3 Scan

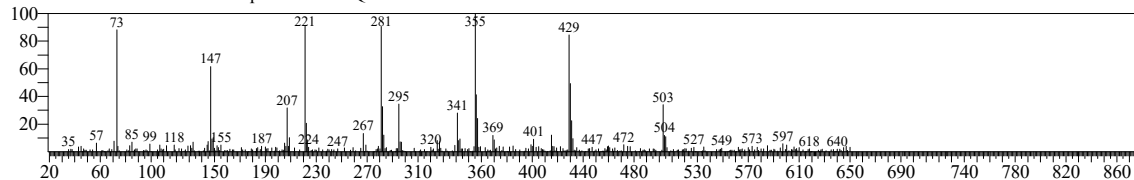

Hit#:1 Entry:46368 Library:NIST20M2.lib

SI:83 Formula:C<sub>24</sub>H<sub>72</sub>O<sub>12</sub>Si<sub>12</sub> CAS:18919-94-3 MolWeight:888 RetIndex:2480

CompName:Tetracosamethyl-cyclododecasiloxane \$\$ 2,2,4,4,6,6,8,8,10,10,12,12,14,14,16,16,18,18,20,20,22,22,24,24-Tetracosamethylcyclododecasiloxane



Hit#:2 Entry:45685 Library:NIST20M2.lib

SI:80 Formula:C<sub>20</sub>H<sub>60</sub>O<sub>10</sub>Si<sub>10</sub> CAS:18772-36-6 MolWeight:740 RetIndex:2067

CompName:Cyclodecasiloxane, eicosamethyl- \$\$ 2,2,4,4,6,6,8,8,10,10,12,12,14,14,16,16,18,18,20,20-Icosamethylcyclodecasiloxane # \$\$ Eicosamethyl-cy



Hit#:3 Entry:44570 Library:NIST20M2.lib

SI:77 Formula:C<sub>18</sub>H<sub>54</sub>O<sub>9</sub>Si<sub>9</sub> CAS:556-71-8 MolWeight:666 RetIndex:1860

CompName:Cyclononasiloxane, octadecamethyl- \$\$ Octadecamethyl-cyclononasiloxane \$\$ 2,2,4,4,6,6,8,8,10,10,12,12,14,14,16,16,18,18-Octadecamethylcy



Hit#:4 Entry:42942 Library:NIST20M2.lib

SI:72 Formula:C<sub>18</sub>H<sub>54</sub>O<sub>7</sub>Si<sub>8</sub> CAS:556-69-4 MolWeight:606 RetIndex:1622

CompName:1,1,1,3,3,5,5,7,7,9,9,11,11,13,13,15,15-octadecamethyloctasiloxane \$\$ Polydimethylsilane Oil



Hit#:5 Entry:45794 Library:NIST20M2.lib

SI:70 Formula:C<sub>22</sub>H<sub>66</sub>O<sub>9</sub>Si<sub>10</sub> CAS:556-70-7 MolWeight:754 RetIndex:1991

CompName:1,1,1,3,3,5,5,7,7,9,9,11,11,13,13,15,15,17,17,19,19,19-docosamethyldecasiloxane \$\$ Polydimethylsilane Oil



# TNAU

<< Target >>

Line#:17 R.Time:45.595(Scan#:8120) MassPeaks:455

RawMode:Averaged 45.590-45.600(8119-8121) BasePeak:139.10(5133)

BG Mode:Calc. from Peak Group 1 - Event 1 Q3 Scan

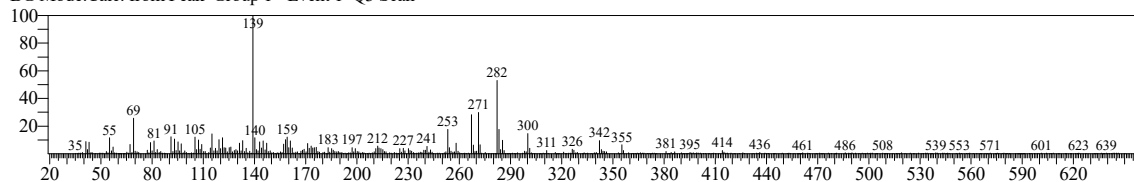

Hit#:1 Entry:8297 Library:NIST20M2.lib

SI:90 Formula:C27H42O3 CAS:512-04-9 MolWeight:414 RetIndex:2844

CompName:Diosgenin \$\$ Spirost-5-en-3-ol, (3.beta.,25R)- \$\$ Spirost-5-en-3.beta.-ol, (25R)- \$\$ Nitrogenin \$\$ 25D-spirost-5-en-3.beta.-ol \$\$ Spiro(8H-nap

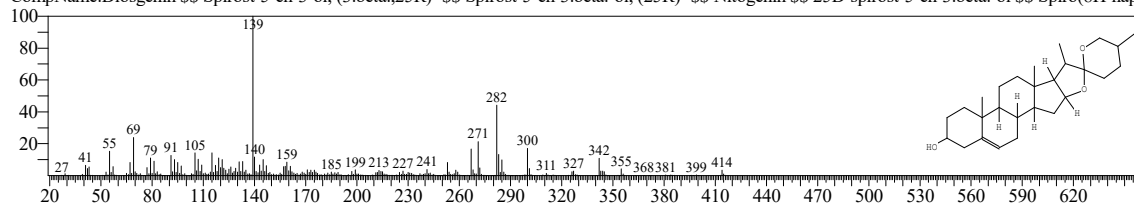

Hit#:2 Entry:41561 Library:NIST20R.lib

SI:81 Formula:C27H42O2 CAS:32277-73-9 MolWeight:398 RetIndex:2713

CompName:Des-N-solasodine \$\$ Furosta-5,20(22)-dien-3-ol #

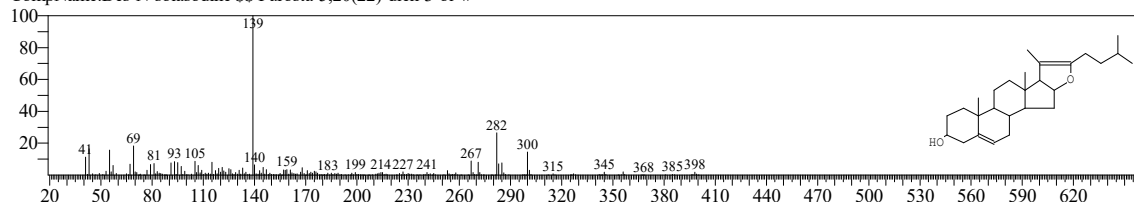

Hit#:3 Entry:14852 Library:NIST20M2.lib

SI:80 Formula:C28H44O3 CAS:116292-24-1 MolWeight:428 RetIndex:2793

CompName:Diosgenin methyl ether \$\$ Diosgenin Me derivative \$\$ (3.beta.,25R)-3-Methoxyspirost-5-ene \$\$ Spirost-5-ene, 3-methoxy-, (3.beta.,25R)-

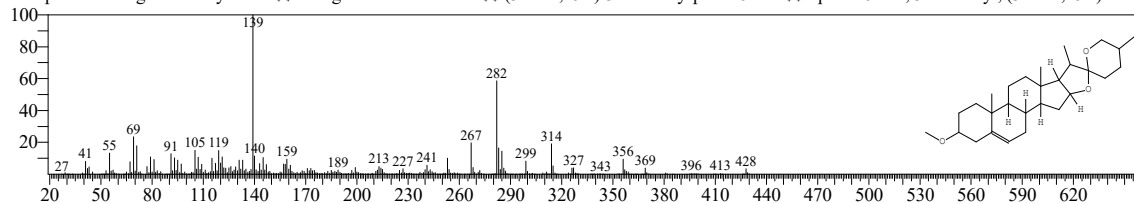

Hit#:4 Entry:24878 Library:NIST20M2.lib

SI:79 Formula:C29H44O4 CAS:1061-54-7 MolWeight:456 RetIndex:2984

CompName:Spirost-5-en-3-ol, acetate, (3.beta.,25R)- \$\$ Diosgenin acetate \$\$ Spirost-5-en-3.beta.-ol, acetate, (25R)- \$\$ Spirost-5-en-3.beta.-ol, acetate, (25R)-

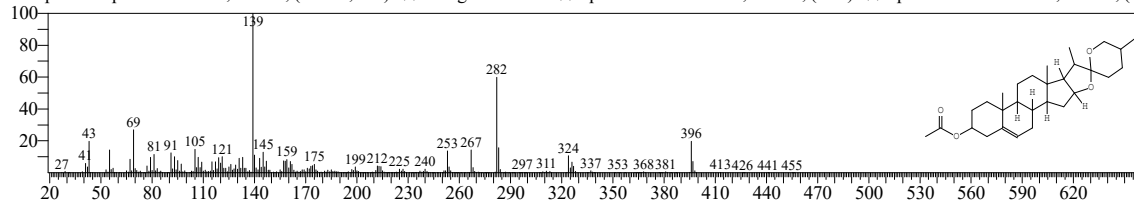

Hit#:5 Entry:42677 Library:NIST20R.lib

SI:74 Formula:C29H44O4 CAS:1180-12-7 MolWeight:456 RetIndex:2984

CompName:Neodiosgenin (3.beta.,25S) acetate \$\$ Spirost-5-en-3-ol, 3-acetate, (3.beta.,25S)- \$\$ Spirost-5-en-3-ol, acetate, (3.beta.,25S)- \$\$ Spirost-5-en-3-

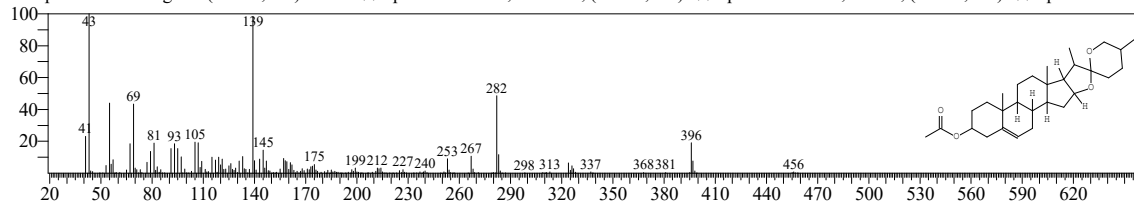

# TNAU

<< Target >>

Line#:18 R.Time:45.785(Scan#:8158) MassPeaks:311

RawMode:Averaged 45.780-45.790(8157-8159) BasePeak:355.10(785)

BG Mode:Calc. from Peak Group 1 - Event 1 Q3 Scan

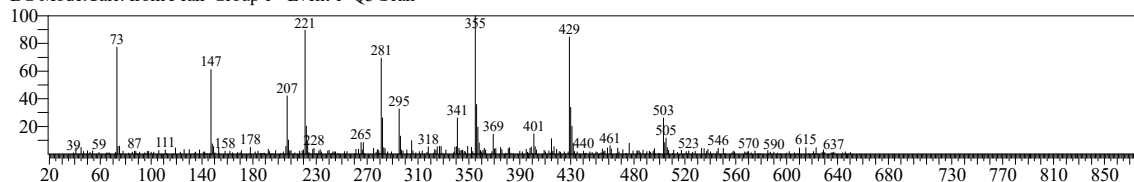

Hit#:1 Entry:46368 Library:NIST20M2.lib

SI:85 Formula:C<sub>24</sub>H<sub>72</sub>O<sub>12</sub>Si<sub>12</sub> CAS:18919-94-3 MolWeight:888 RetIndex:2480

CompName:Tetracosamethylcyclododecasiloxane \$ \$ 2,2,4,4,6,6,8,8,10,10,12,12,14,14,16,16,18,18,20,20,22,22,24,24-Tetracosamethylcyclododecasiloxan

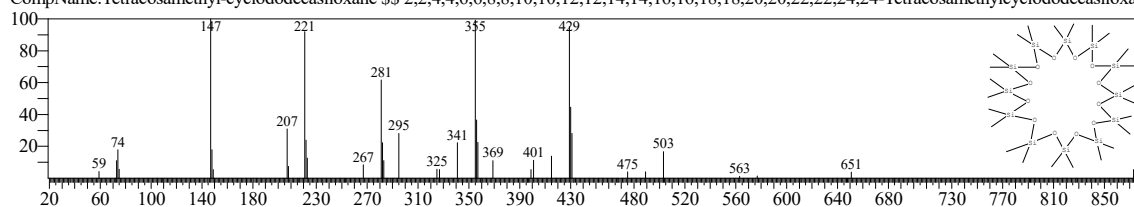

Hit#:2 Entry:43658 Library:NIST20R.lib

SI:81 Formula:C<sub>18</sub>H<sub>54</sub>O<sub>9</sub>Si<sub>9</sub> CAS:556-71-8 MolWeight:666 RetIndex:1860

CompName:Cyclononasiloxane, octadecamethyl- \$ \$ Octadecamethyl-cyclononasiloxane \$ \$ 2,2,4,4,6,6,8,8,10,10,12,12,14,14,16,16,18,18-Octadecamethyley

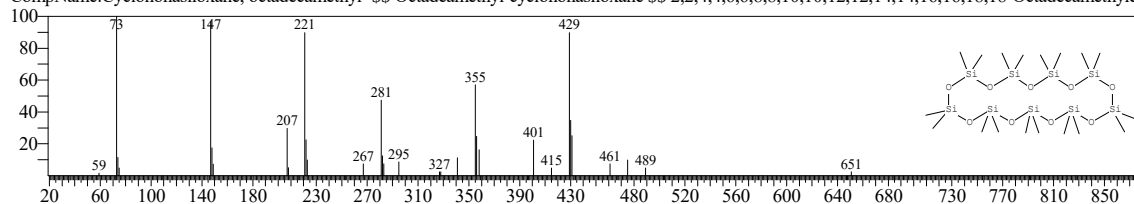

Hit#:3 Entry:45685 Library:NIST20M2.lib

SI:79 Formula:C<sub>20</sub>H<sub>60</sub>O<sub>10</sub>Si<sub>10</sub> CAS:18772-36-6 MolWeight:740 RetIndex:2067

CompName:Cyclodecasiloxane, eicosamethyl- \$ \$ 2,2,4,4,6,6,8,8,10,10,12,12,14,14,16,16,18,18,20,20-Icosamethylcyclodecasiloxane # \$ \$ Eicosamethyl-cy

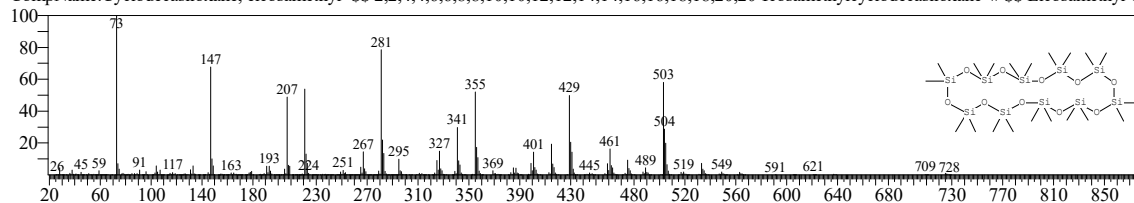

Hit#:4 Entry:42942 Library:NIST20M2.lib

SI:71 Formula:C<sub>18</sub>H<sub>54</sub>O<sub>7</sub>Si<sub>8</sub> CAS:556-69-4 MolWeight:606 RetIndex:1622

CompName:1,1,1,3,3,5,5,7,7,9,9,11,11,13,13,15,15,15-octadecamethyloctasiloxane \$ \$ Polydimethylsilane Oil

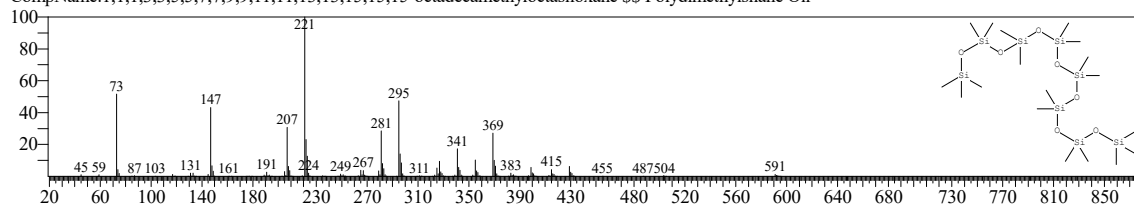

Hit#:5 Entry:402 Library:OA.TMS.DB5.67min.V3.lib

SI:60 Formula:C<sub>20</sub>H<sub>42</sub>O<sub>4</sub>Si<sub>4</sub> CAS:775-01-9 MolWeight:458 RetIndex:1942

CompName:3,4-Dihydroxymandelic acid-4TMS ; 2-(3,4-dihydroxyphenyl)-2-hydroxyacetic acid

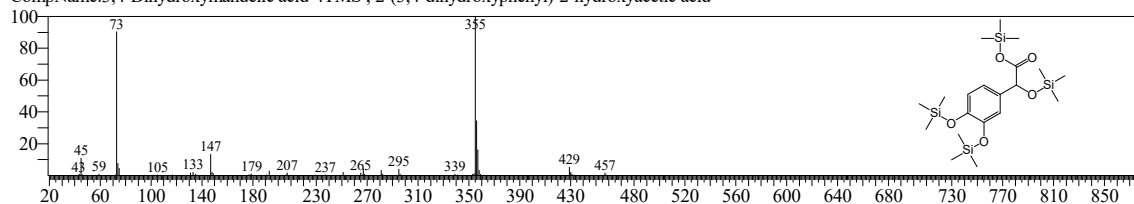

Supplement: Supplementary file 61 [file supplementary]
