# Supplementary material for: Comparative Metabolomics Profiling Reveals Key Metabolites and Associated Pathways Regulating Tuber Dormancy in White Yam (<em>Dioscorea rotundata</em>)
Source: Preprints.org preprint supplement (doi:10.20944/preprints202303.0378.v1), 2023-03-21

# TNAU

## Sample Information

Analyzed by : Admin  
 Analyzed : 05-Aug-22 3:57:27 AM  
 Sample Type : Unknown  
 Level # : 1  
 Sample Name : C143-2  
 Sample ID : C143-2  
 IS Amount : [1]=1  
 Sample Amount : 1  
 Dilution Factor : 1  
 Vial # : 18  
 Injection Volume : 1.00  
 Data File : D:\GCMS-8040NX\Aug 2022\Users\04.08.2022\Data files\04082022-018.qgd  
 Org Data File : D:\GCMS-8040NX\Aug 2022\Users\04.08.2022\Data files\04082022-018.qgd  
 Method File : D:\GCMS-8040NX\Aug 2022\Users\04.08.2022\Method file\27072022\_methodfile.qgm  
 Org Method File : D:\GCMS-8040NX\Aug 2022\Users\04.08.2022\Method file\27072022\_methodfile.qgm  
 Report File :  
 Tuning File : D:\GCMS-8040NX\Aug 2022\Tuning Data\TUNING 04082022.qgt  
 [Comment]  
 Jerry samples  
 Modified by : Admin  
 Modified : 05-Aug-22 4:33:45 PM

Chromatogram C143-2 D:\GCMS-8040NX\Aug 2022\Users\04.08.2022\Data files\04082022-018.qgd

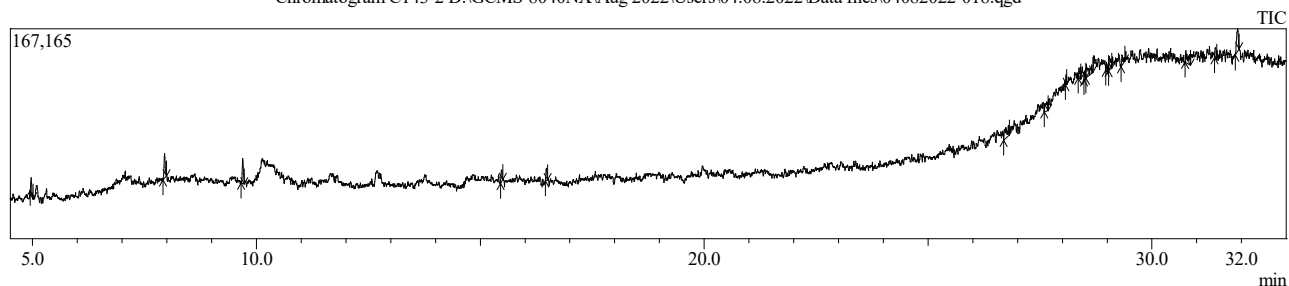

Peak Report TIC

| Peak# | R.Time | Area   | Area%  | Height | Height% | A/H  | Similarity | Name                                          |
|-------|--------|--------|--------|--------|---------|------|------------|-----------------------------------------------|
| 1     | 4.967  | 17503  | 4.13   | 12201  | 7.04    | 1.43 | 50         | Methyl butanoate                              |
| 2     | 7.947  | 37059  | 8.75   | 19594  | 11.31   | 1.89 | 87         | Undecane                                      |
| 3     | 9.693  | 36125  | 8.52   | 19979  | 11.53   | 1.81 | 87         | Tridecane                                     |
| 4     | 15.475 | 15769  | 3.72   | 9023   | 5.21    | 1.75 | 73         | Phenol, 3,5-bis(1,1-dimethylethyl)-           |
| 5     | 16.479 | 16693  | 3.94   | 9466   | 5.46    | 1.76 | 75         | 2,2,4-Trimethyl-1,3-pentanediol diisobutyrate |
| 6     | 26.794 | 38893  | 9.18   | 8500   | 4.91    | 4.58 | 46         | Epinephrine-3TMS                              |
| 7     | 27.605 | 27107  | 6.40   | 5505   | 3.18    | 4.92 | 32         | 4-Hydroxybenzoic acid-2TMS                    |
| 8     | 28.081 | 5980   | 1.41   | 7699   | 4.44    | 0.78 | 30         | Hypoxanthine-2TMS                             |
| 9     | 28.397 | 17419  | 4.11   | 8927   | 5.15    | 1.95 | 37         | 3-Hydroxybenzoic acid-2TMS                    |
| 10    | 28.495 | 11525  | 2.72   | 4983   | 2.88    | 2.31 | 29         | 3,4-Dihydroxymandelic acid-4TMS               |
| 11    | 28.535 | 43725  | 10.32  | 10296  | 5.94    | 4.25 | 33         | Batyl alcohol-2TMS                            |
| 12    | 28.980 | 9824   | 2.32   | 5729   | 3.31    | 1.71 | 36         | Lyxose-4TMS(2)                                |
| 13    | 29.045 | 27024  | 6.38   | 8910   | 5.14    | 3.03 | 41         | 3,4-Dihydroxymandelic acid-4TMS               |
| 14    | 29.330 | 16336  | 3.86   | 6790   | 3.92    | 2.41 | 35         | Hypoxanthine-2TMS                             |
| 15    | 30.758 | 37097  | 8.75   | 9238   | 5.33    | 4.02 | 34         | Hippuric acid-TMS                             |
| 16    | 31.420 | 14764  | 3.48   | 8558   | 4.94    | 1.73 | 33         | Mandelic acid-2TMS                            |
| 17    | 31.913 | 50918  | 12.02  | 17881  | 10.32   | 2.85 | 28         | Methyl cis-4,7,10,13,16,19-Docosahexaenoate   |
|       |        | 423761 | 100.00 | 173279 | 100.00  |      |            |                                               |

Library

# TNAU

<< Target >>

Line#:1 R.Time:4.965(Scan#:94) MassPeaks:354

RawMode:Averaged 4.960-4.970(93-95) BasePeak:89.10(1804)

BG Mode:Calc. from Peak Group 1 - Event 1 Q3 Scan

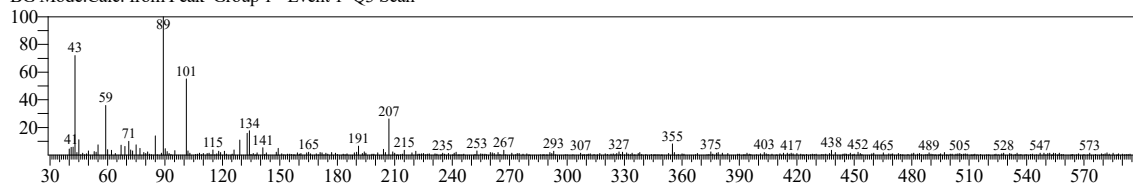

Hit#:1 Entry:1 Library:FA\_ME\_SP2560\_EI\_V3.lib

SI:50 Formula:C5H10O2 CAS:107-92-6 MolWeight:102 RetIndex:1113

CompName:Methyl butanoate ; Butanoic acid

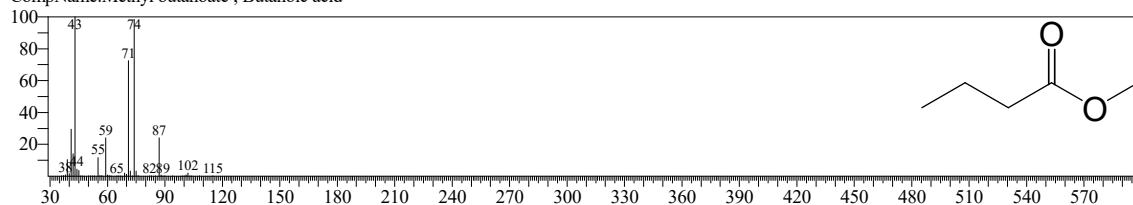

Hit#:2 Entry:477 Library:OA\_TMS\_DB5\_67min\_V3.lib

SI:47 Formula:C21H46OSi CAS:112-92-5 MolWeight:342 RetIndex:2156

CompName:Octadecanol-TMS ; octadecan-1-ol

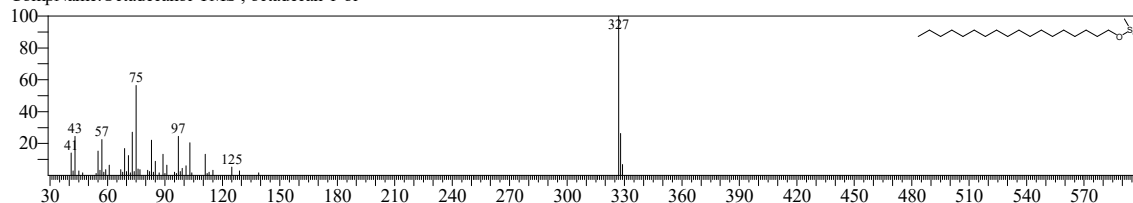

Hit#:3 Entry:39 Library:OA\_TMS\_DB5\_67min\_V3.lib

SI:46 Formula:C10H21NO3Si CAS:816-66-0 MolWeight:231 RetIndex:1181

CompName:2-Ketoisocaproic acid-meto-TMS(1) ; 4-methyl-2-oxopentanoic acid

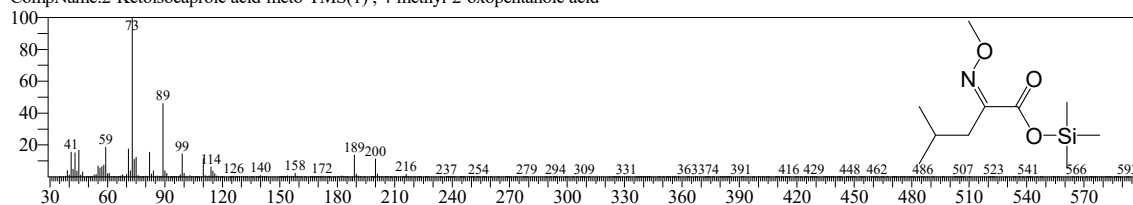

Hit#:4 Entry:2 Library:OA\_TMS\_DB5\_67min\_V3.lib

SI:45 Formula:C6H13NO3Si CAS:298-12-4 MolWeight:175 RetIndex:990

CompName:Glyoxylic acid-meto-TMS ; oxaldehydic acid

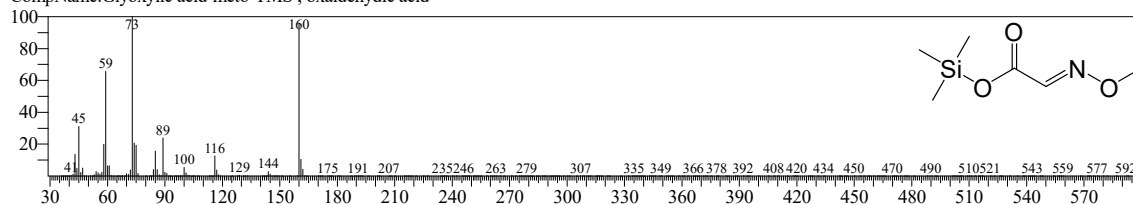

Hit#:5 Entry:215 Library:OA\_TMS\_DB5\_67min\_V3.lib

SI:43 Formula:C13H27NO5Si2 CAS:3184-35-8 MolWeight:333 RetIndex:1640

CompName:2-Ketoadipic acid-meto-2TMS(1) ; 2-oxohexanedioic acid

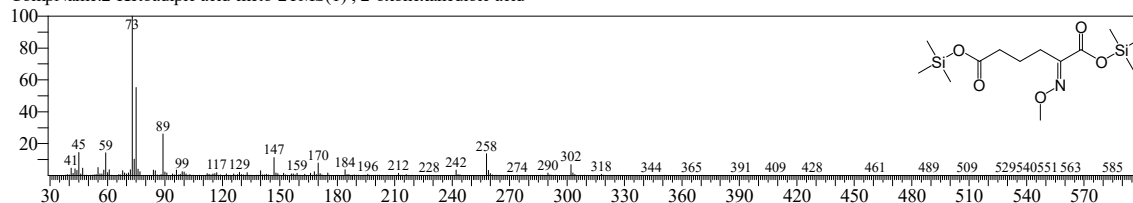

# TNAU

<< Target >>

Line# 2 R.Time: 7.945 (Scan#: 690) MassPeaks: 294

RawMode: Averaged 7.940-7.950 (689-691) BasePeak: 57.10 (4395)

BG Mode: Calc. from Peak Group 1 - Event 1 Q3 Scan

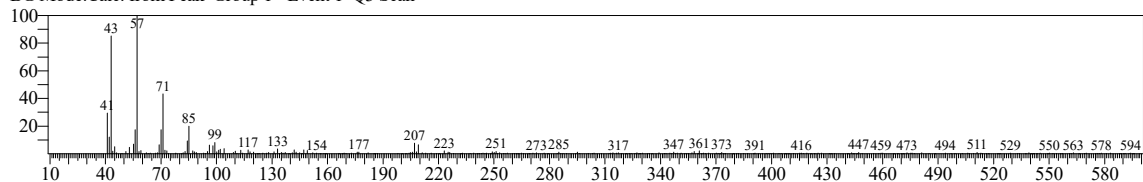

Hit#: 1 Entry: 12899 Library: NIST20R.lib

SI: 87 Formula: C<sub>11</sub>H<sub>24</sub> CAS: 1120-21-4 MolWeight: 156 RetIndex: 1100

CompName: Undecane \$\$ n-Undecane \$\$ Hendecane \$\$ n-C<sub>11</sub>H<sub>24</sub> \$\$ UN 2330

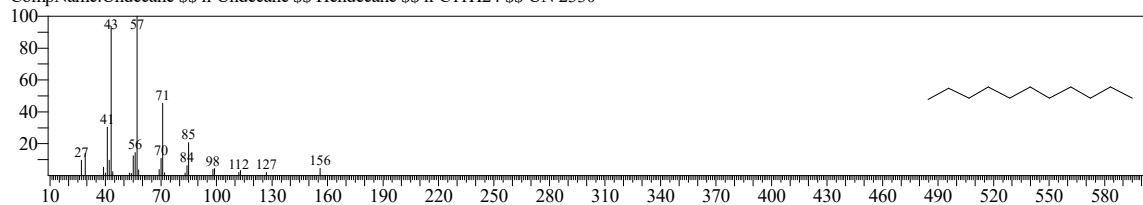

Hit#: 2 Entry: 40226 Library: NIST20M1.lib

SI: 86 Formula: C<sub>13</sub>H<sub>28</sub> CAS: 629-50-5 MolWeight: 184 RetIndex: 1300

CompName: Tridecane \$\$ n-Tridecane \$\$ Tridecane, n-

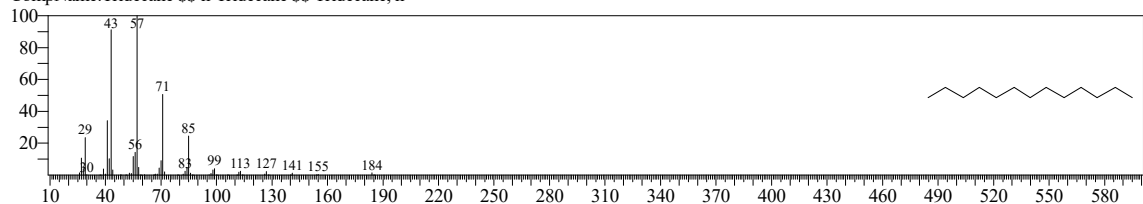

Hit#: 3 Entry: 9445 Library: NIST20R.lib

SI: 85 Formula: C<sub>10</sub>H<sub>22</sub> CAS: 124-18-5 MolWeight: 142 RetIndex: 1000

CompName: Decane \$\$ n-Decane \$\$ n-C<sub>10</sub>H<sub>22</sub> \$\$ UN 2247

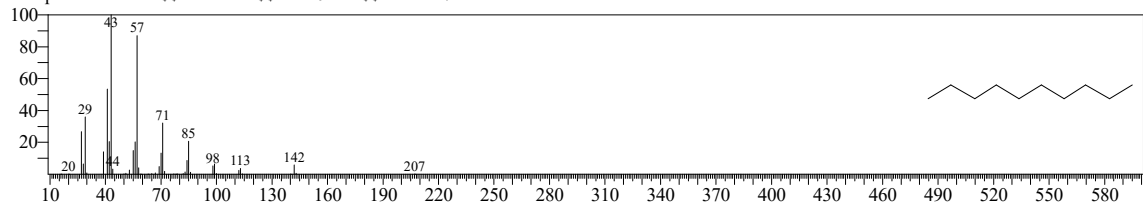

Hit#: 4 Entry: 27737 Library: NIST20R.lib

SI: 85 Formula: C<sub>16</sub>H<sub>34</sub> CAS: 544-76-3 MolWeight: 226 RetIndex: 1600

CompName: Hexadecane \$\$ n-Cetane \$\$ n-Hexadecane \$\$ Cetane

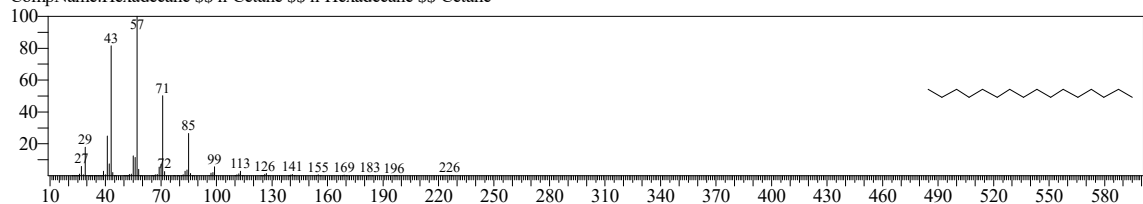

Hit#: 5 Entry: 40255 Library: NIST20M1.lib

SI: 85 Formula: C<sub>13</sub>H<sub>28</sub> CAS: 62108-21-8 MolWeight: 184 RetIndex: 1185

CompName: Decane, 6-ethyl-2-methyl- \$\$ 6-Ethyl-2-methyldecane #

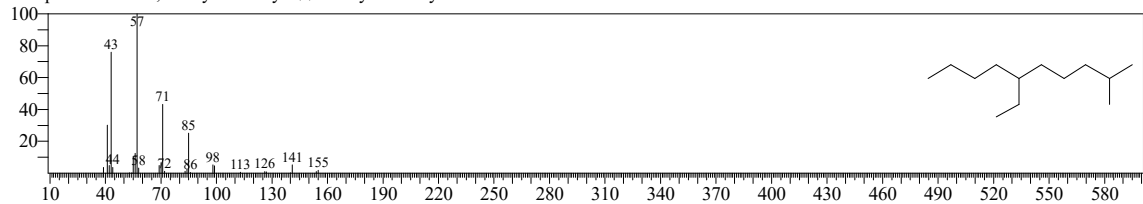

# TNAU

<< Target >>

Line#3 R.Time:9.695(Scan#:1040) MassPeaks:291

RawMode:Averaged 9.690-9.700(1039-1041) BasePeak:57.10(4693)

BG Mode:Calc. from Peak Group 1 - Event 1 Q3 Scan

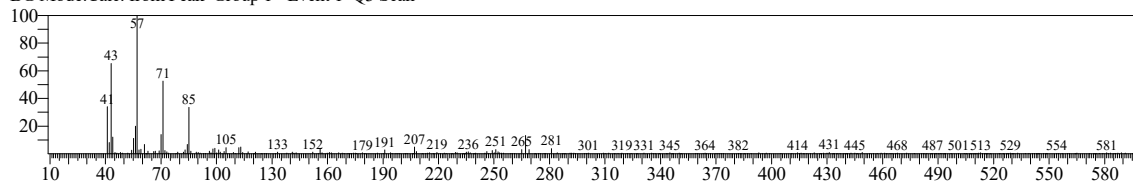

Hit#:1 Entry:40226 Library:NIST20M1.lib

SI:87 Formula:C13H28 CAS:629-50-5 MolWeight:184 RetIndex:1300

CompName:Tridecane \$\$ n-Tridecane \$\$ Tridecane, n-

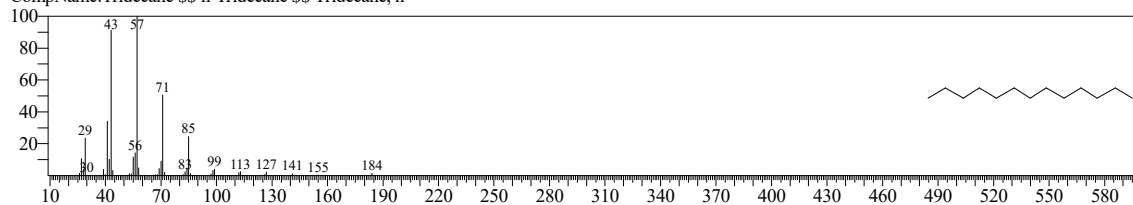

Hit#:2 Entry:21042 Library:NIST20M1.lib

SI:87 Formula:C11H24 CAS:1120-21-4 MolWeight:156 RetIndex:1100

CompName:Undecane \$\$ n-Undecane \$\$ Hendecane \$\$ n-C11H24 \$\$ UN 2330

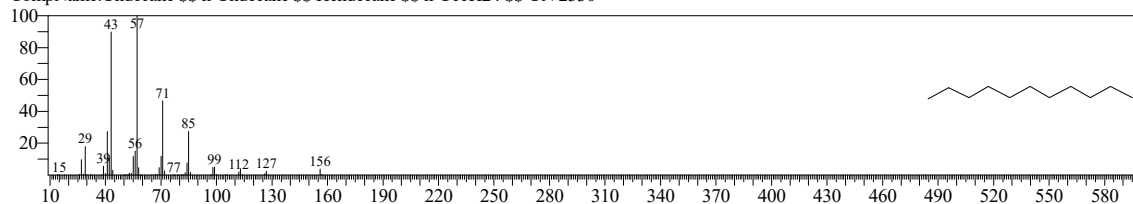

Hit#:3 Entry:30057 Library:NIST20M1.lib

SI:87 Formula:C12H26 CAS:112-40-3 MolWeight:170 RetIndex:1200

CompName:Dodecane \$\$ n-Dodecane \$\$ Adakane 12 \$\$ Ba 51-090453 \$\$ CH3(CH2)10CH3 \$\$ Bihexyl \$\$ Dihexyl \$\$ Duodecane \$\$ NSC 8714

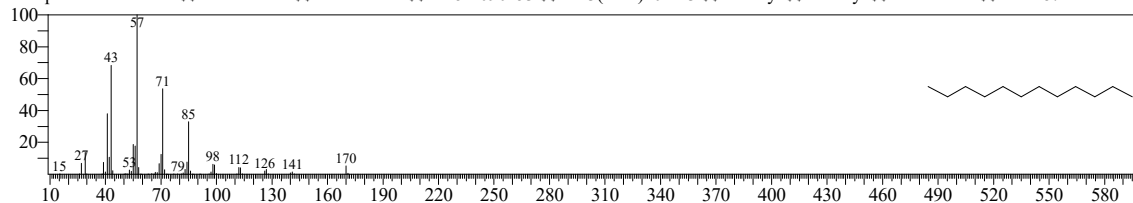

Hit#:4 Entry:40271 Library:NIST20M1.lib

SI:85 Formula:C13H28 CAS:17312-82-2 MolWeight:184 RetIndex:1185

CompName:Undecane, 4,6-dimethyl- \$\$ 4,6-Dimethylundecane #

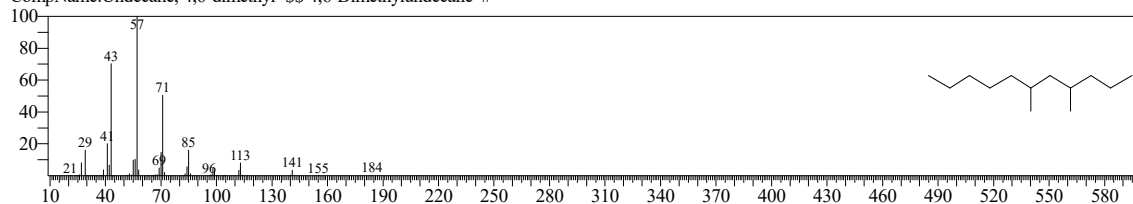

Hit#:5 Entry:22497 Library:NIST20R.lib

SI:85 Formula:C14H30 CAS:629-59-4 MolWeight:198 RetIndex:1400

CompName:Tetradecane \$\$ n-Tetradecane

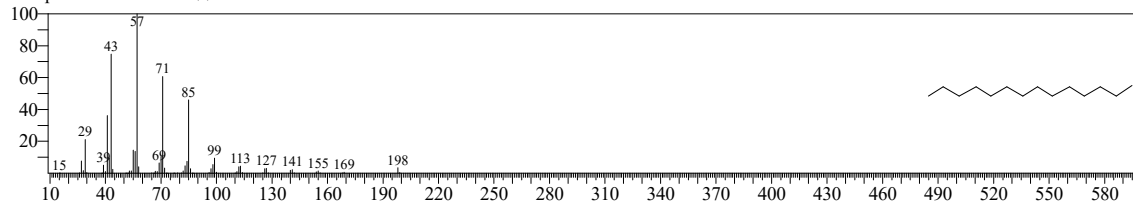

# TNAU

<< Target >>

Line#:4 R.Time:15.475(Scan#:2196) MassPeaks:302

RawMode:Averaged 15.470-15.480(2195-2197) BasePeak:191.05(1956)

BG Mode:Calc. from Peak Group 1 - Event 1 Q3 Scan

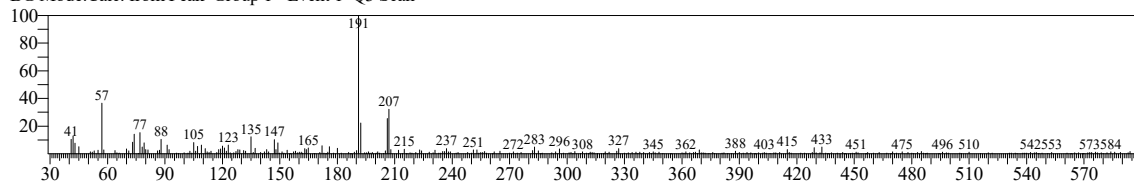

Hit#:1 Entry:24108 Library:NIST20R.lib

SI:73 Formula:C14H22O CAS:1138-52-9 MolWeight:206 RetIndex:1555

CompName:Phenol, 3,5-bis(1,1-dimethylethyl)- \$ Phenol, 3,5-di-tert-butyl- \$ 3,5-Di-tert-butylphenol \$ Phenol, 3,5-bis(t-butyl) \$ 3,5-Di-t-butylphenol \$

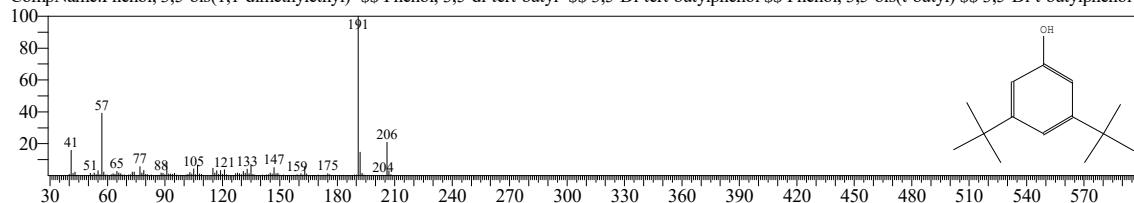

Hit#:2 Entry:24097 Library:NIST20R.lib

SI:70 Formula:C14H22O CAS:5875-45-6 MolWeight:206 RetIndex:1555

CompName:Phenol, 2,5-bis(1,1-dimethylethyl)- \$ Phenol, 2,5-di-tert-butyl- \$ 2,5-Di-tert-butylphenol \$ 2,5-bis(1,1-Dimethylethyl)phenol

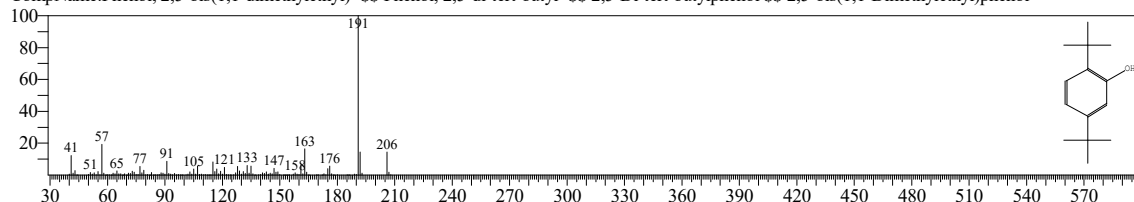

Hit#:3 Entry:330 Library:OA\_TMS\_DB5\_67min\_V3.lib

SI:47 Formula:C12H17NO3Si CAS:66407-11-2 MolWeight:251 RetIndex:1849

CompName:Hippuric acid-TMS ; 2-benzamidoacetic acid

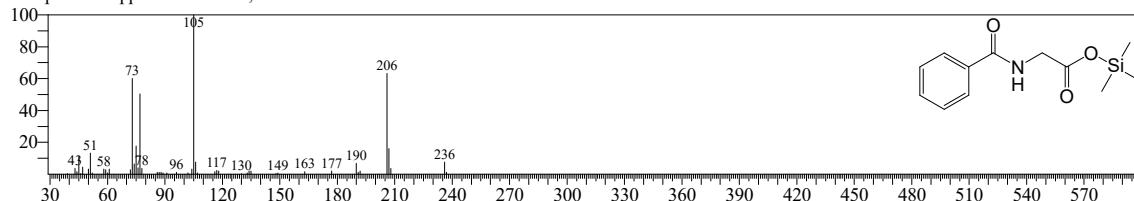

Hit#:4 Entry:9 Library:OA\_TMS\_DB5\_67min\_V3.lib

SI:43 Formula: CAS:0-00-0 MolWeight:237 RetIndex:1062

CompName:Lactic acid-13C3-2TMS ;

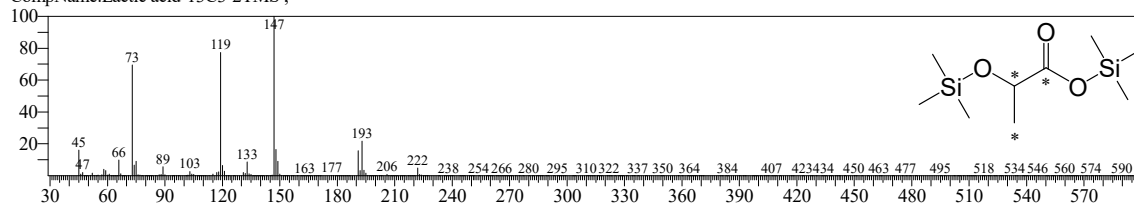

Hit#:5 Entry:290 Library:OA\_TMS\_DB5\_67min\_V3.lib

SI:41 Formula:C13H23NO3Si2 CAS:548-93-6 MolWeight:297 RetIndex:1773

CompName:3-Hydroxyanthranilic acid-2TMS ; 2-amino-3-hydroxybenzoic acid

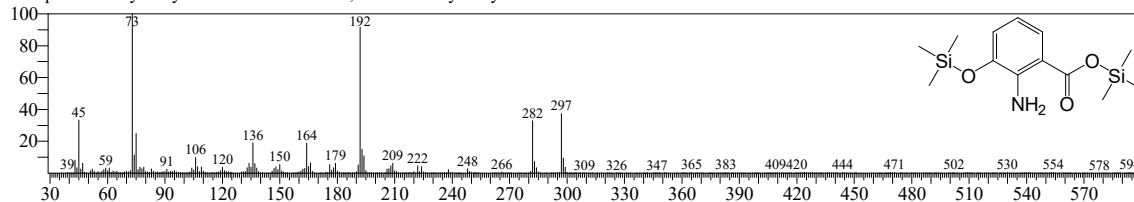

# TNAU

<< Target >>

Line#:5 R.Time:16.480(Scan#:2397) MassPeaks:314

RawMode:Averaged 16.475-16.485(2396-2398) BasePeak:71.05(3093)

BG Mode:Calc. from Peak Group 1 - Event 1 Q3 Scan

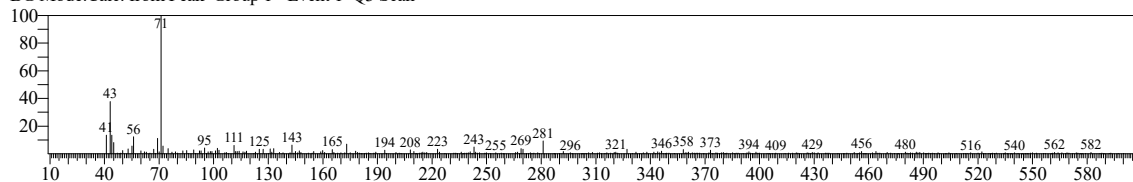

Hit#:1 Entry:34622 Library:NIST20R.lib

SI:75 Formula:C16H30O4 CAS:6846-50-0 MolWeight:286 RetIndex:1605

CompName:2,2,4-Trimethyl-1,3-pentanediol diisobutyrate \$\$ Propanoic acid, 2-methyl-, 2,2-dimethyl-1-(1-methylethyl)-1,3-propanediyl ester \$\$ 1,3-Pentan

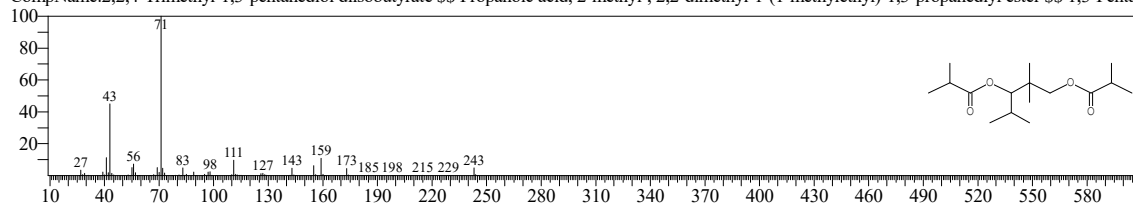

Hit#:2 Entry:146809 Library:NIST20M1.lib

SI:74 Formula:C16H30O4 CAS:0-00-0 MolWeight:286 RetIndex:1605

CompName:Pentanoic acid, 2,2,4-trimethyl-3-carboxyisopropyl, isobutyl ester \$\$ 1-Isobutyl 4-isopropyl 3-isopropyl-2,2-dimethylsuccinate #

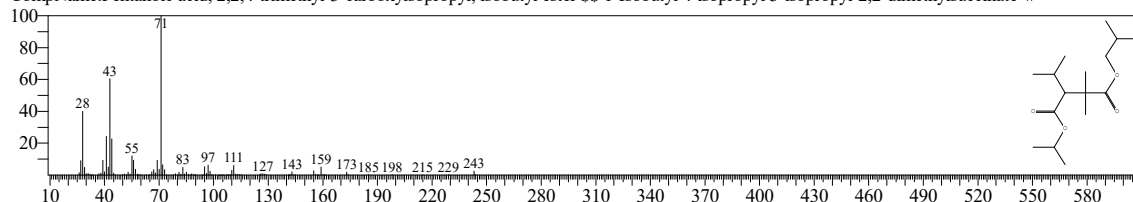

Hit#:3 Entry:50931 Library:NIST20M1.lib

SI:71 Formula:C5H11I CAS:18295-27-7 MolWeight:198 RetIndex:804

CompName:Butane, 2-iodo-3-methyl- \$\$ 2-Iodo-3-methylbutane \$\$ Butane, 3-methyl-2-iodo

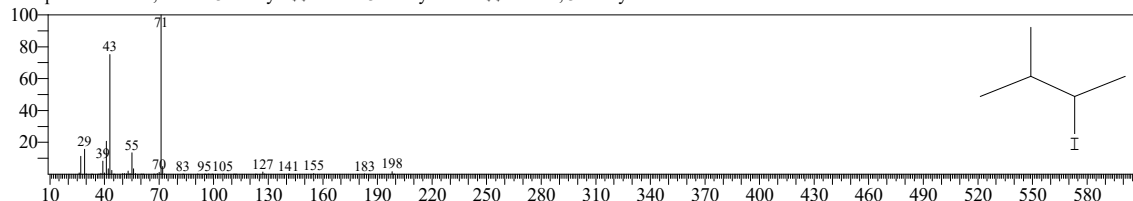

Hit#:4 Entry:68586 Library:NIST20M1.lib

SI:70 Formula:C12H24O3 CAS:74367-32-1 MolWeight:216 RetIndex:1432

CompName:Propanoic acid, 2-methyl-, 2-(hydroxymethyl)-1-propylbutyl ester \$\$ 2-(Hydroxymethyl)-1-propylbutyl 2-methylpropanoate #

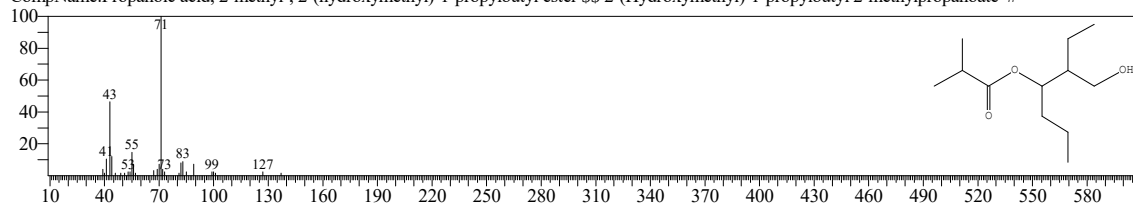

Hit#:5 Entry:13726 Library:NIST20M1.lib

SI:70 Formula:C6H9NOS CAS:36810-87-4 MolWeight:143 RetIndex:0

CompName:2-Tetrahydrofurfuryl isothiocyanate \$\$ 2-(Isothiocyanatomethyl)tetrahydrofuran #

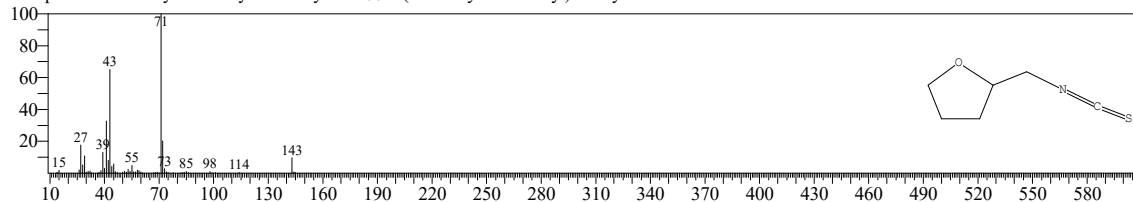

# TNAU

<< Target >>

Line#:6 R.Time:26.795(Scan#:4460) MassPeaks:301

RawMode:Averaged 26.790-26.800(4459-4461) BasePeak:207.05(1998)

BG Mode:Calc. from Peak Group 1 - Event 1 Q3 Scan

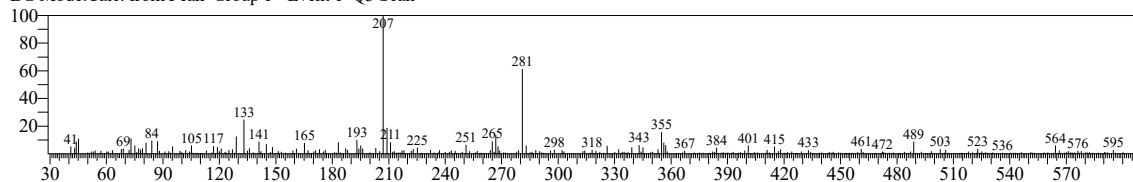

Hit#:1 Entry:343 Library:OA\_TMS\_DB5\_67min\_V3.lib

SI:46 Formula:C18H37NO3Si3 CAS:51-43-4 MolWeight:399 RetIndex:1868

CompName:Epinephrine-3TMS ; 4-[(1R)-1-hydroxy-2-(methylamino)ethyl]benzene-1,2-diol

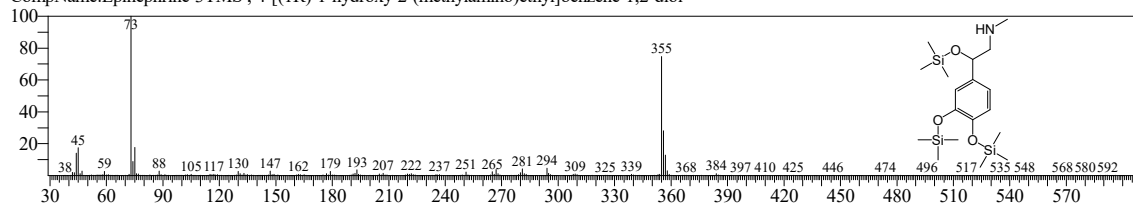

Hit#:2 Entry:402 Library:OA\_TMS\_DB5\_67min\_V3.lib

SI:45 Formula:C20H42O4Si4 CAS:775-01-9 MolWeight:458 RetIndex:1942

CompName:3,4-Dihydroxymandelic acid-4TMS ; 2-(3,4-dihydroxyphenyl)-2-hydroxyacetic acid

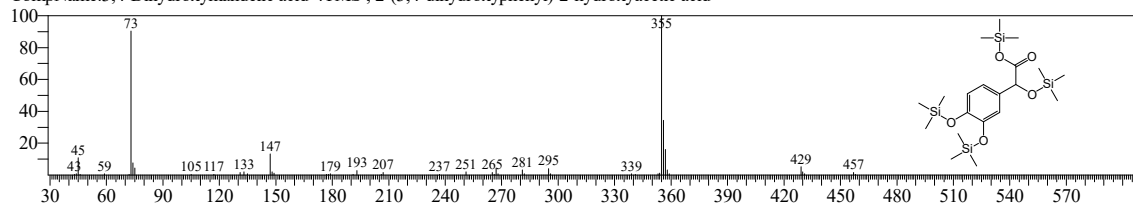

Hit#:3 Entry:315 Library:OA\_TMS\_DB5\_67min\_V3.lib

SI:43 Formula:C16H30O4Si3 CAS:99-50-3 MolWeight:370 RetIndex:1833

CompName:Protocatechuic acid-3TMS ; 3,4-dihydroxybenzoic acid

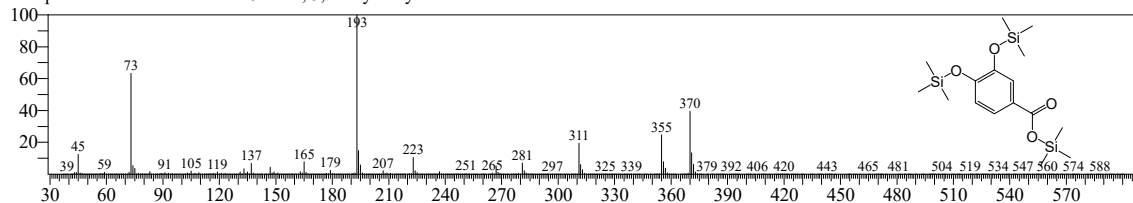

Hit#:4 Entry:211 Library:OA\_TMS\_DB5\_67min\_V3.lib

SI:38 Formula:C13H22O3Si2 CAS:99-96-7 MolWeight:282 RetIndex:1636

CompName:4-Hydroxybenzoic acid-2TMS ; 4-hydroxybenzoic acid

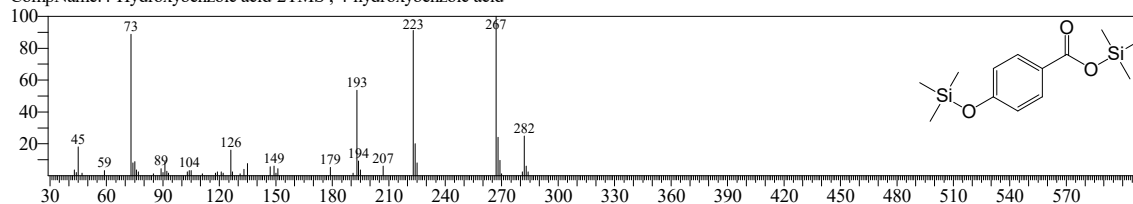

Hit#:5 Entry:328 Library:OA\_TMS\_DB5\_67min\_V3.lib

SI:37 Formula:C13H23NO2Si2 CAS:150-13-0 MolWeight:281 RetIndex:1845

CompName:4-Aminobenzoic acid-2TMS ; 4-aminobenzoic acid

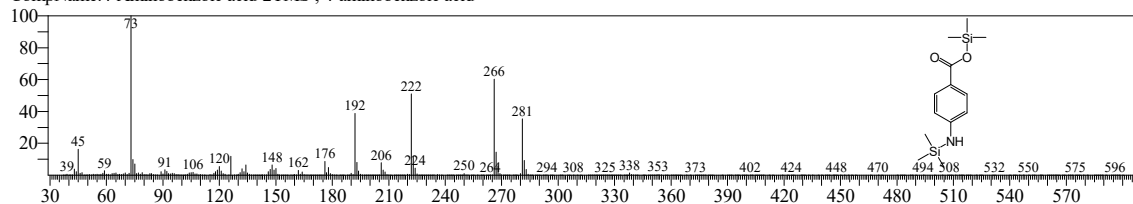

# TNAU

<< Target >>

Line#:7 R.Time:27.605(Scan#:4622) MassPeaks:278

RawMode:Averaged 27.600-27.610(4621-4623) BasePeak:207.05(1012)

BG Mode:Calc. from Peak Group 1 - Event 1 Q3 Scan

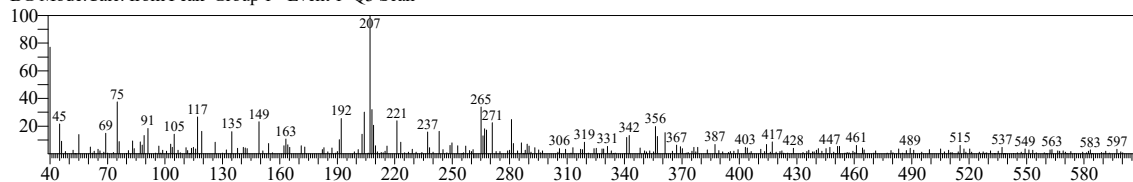

Hit#:1 Entry:211 Library:OA\_TMS\_DB5\_67min\_V3.lib

SI:32 Formula:C<sub>13</sub>H<sub>22</sub>O<sub>3</sub>Si<sub>2</sub> CAS:99-96-7 MolWeight:282 RetIndex:1636

CompName:4-Hydroxybenzoic acid-2TMS ; 4-hydroxybenzoic acid

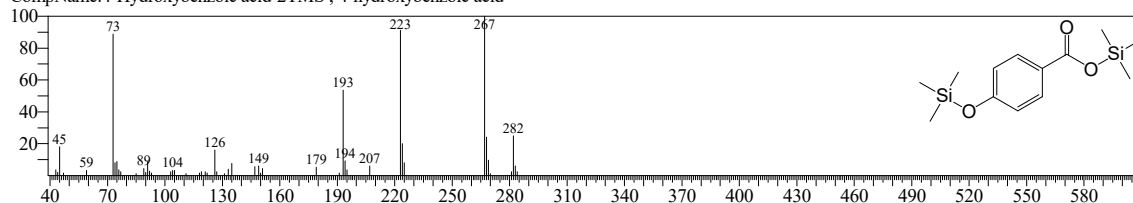

Hit#:2 Entry:179 Library:OA\_TMS\_DB5\_67min\_V3.lib

SI:31 Formula:C<sub>13</sub>H<sub>22</sub>O<sub>3</sub>Si<sub>2</sub> CAS:99-06-9 MolWeight:282 RetIndex:1572

CompName:3-Hydroxybenzoic acid-2TMS ; 3-hydroxybenzoic acid

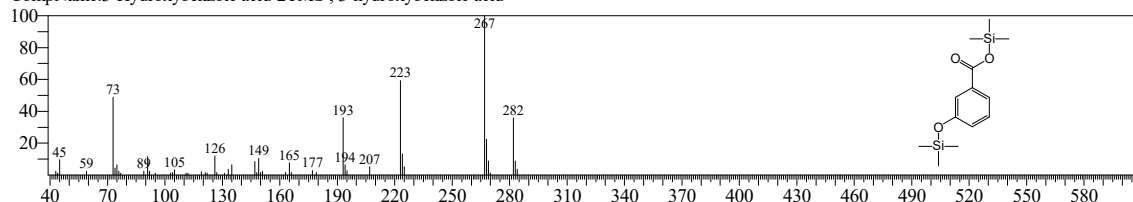

Hit#:3 Entry:386 Library:OA\_TMS\_DB5\_67min\_V3.lib

SI:29 Formula:C<sub>21</sub>H<sub>52</sub>O<sub>6</sub>Si<sub>5</sub> CAS:50-99-7 MolWeight:540 RetIndex:1922

CompName:Glucose-5TMS(1) ; (3R,4S,5S,6R)-6-(hydroxymethyl)oxane-2,3,4,5-tetrol

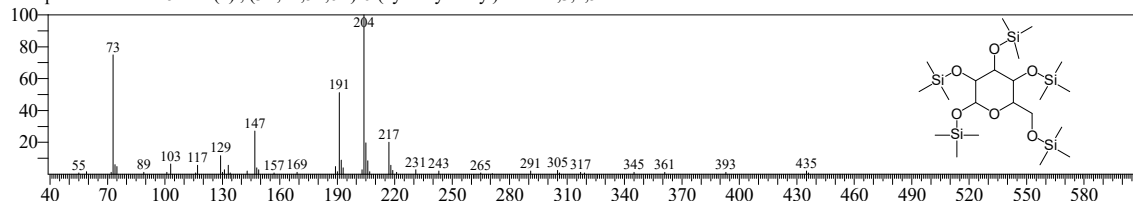

Hit#:4 Entry:203 Library:OA\_TMS\_DB5\_67min\_V3.lib

SI:29 Formula:C<sub>13</sub>H<sub>23</sub>NO<sub>2</sub>Si<sub>2</sub> CAS:118-92-3 MolWeight:281 RetIndex:1623

CompName:Anthranilic acid-2TMS ; 2-aminobenzoic acid

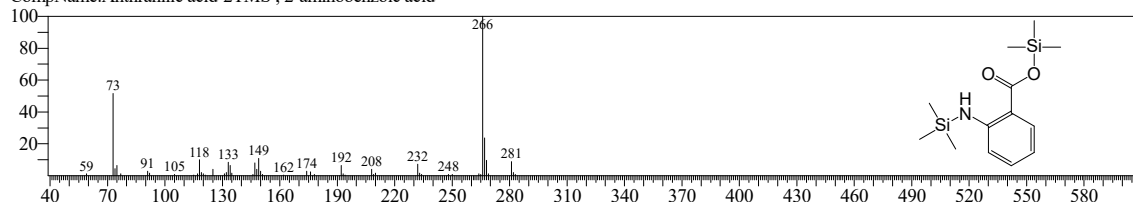

Hit#:5 Entry:307 Library:OA\_TMS\_DB5\_67min\_V3.lib

SI:29 Formula:C<sub>15</sub>H<sub>25</sub>NO<sub>3</sub>Si<sub>2</sub> CAS:66407-11-2 MolWeight:323 RetIndex:1819

CompName:Hippuric acid-2TMS ; 2-benzamidoacetic acid

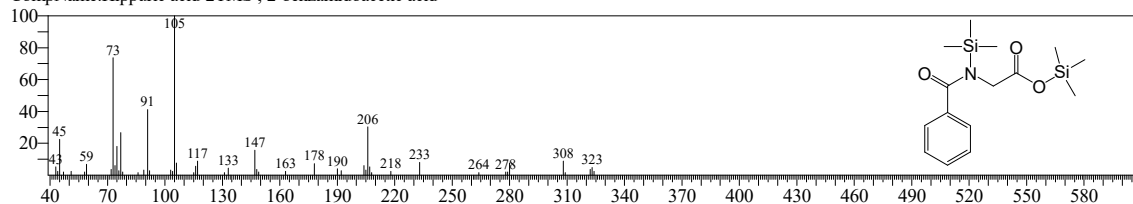



# TNAU

<< Target >>

Line#:8 R.Time:28.080(Scan#:4717) MassPeaks:326

RawMode:Averaged 28.075-28.085(4716-4718) BasePeak:281.00(860)

BG Mode:Calc. from Peak Group 1 - Event 1 Q3 Scan

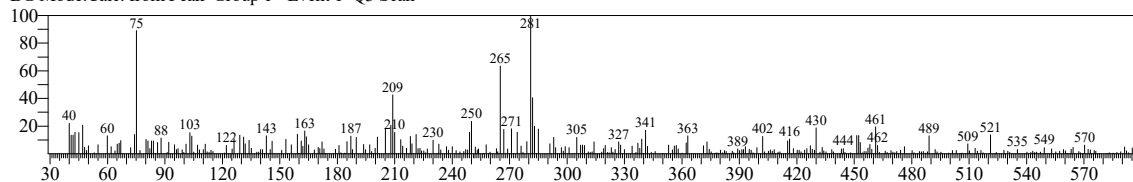

Hit#:1 Entry:310 Library:OA\_TMS\_DB5\_67min\_V3.lib

SI:30 Formula:C11H20N4OSi2 CAS:68-94-0 MolWeight:280 RetIndex:1822

CompName:Hypoxanthine-2TMS ; 3,7-dihydropurin-6-one

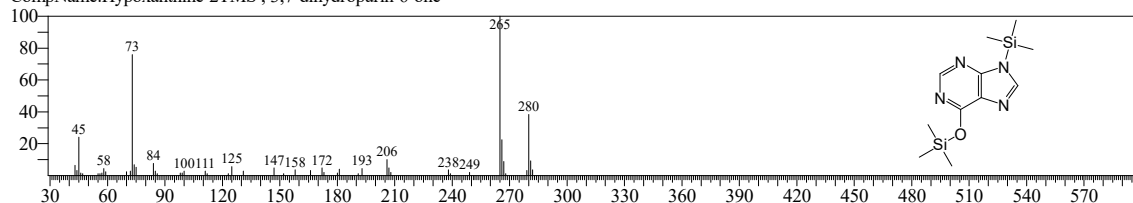

Hit#:2 Entry:70 Library:OA\_TMS\_DB5\_67min\_V3.lib

SI:29 Formula:C11H24O2Si CAS:124-07-2 MolWeight:216 RetIndex:1263

CompName:Octanoic acid-TMS ; octanoic acid

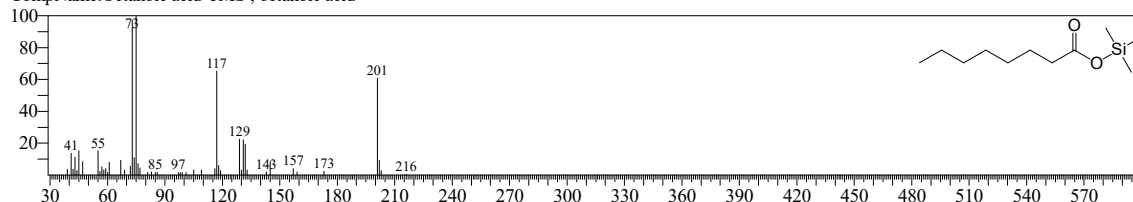

Hit#:3 Entry:11 Library:OA\_TMS\_DB5\_67min\_V3.lib

SI:27 Formula:C9H20O2Si CAS:142-62-1 MolWeight:188 RetIndex:1071

CompName:Caproic acid-TMS ; hexanoic acid

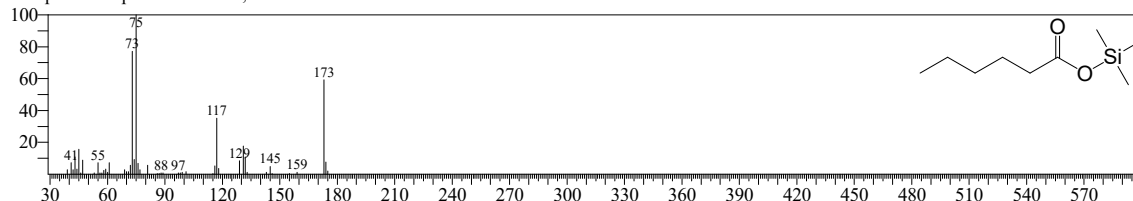

Hit#:4 Entry:341 Library:OA\_TMS\_DB5\_67min\_V3.lib

SI:26 Formula:C18H34O4Si3 CAS:3247-75-4 MolWeight:398 RetIndex:1864

CompName:3-(3-Hydroxyphenyl)-3-hydroxypropionic acid-3TMS ; 3-hydroxy-3-(3-hydroxyphenyl)propanoic acid

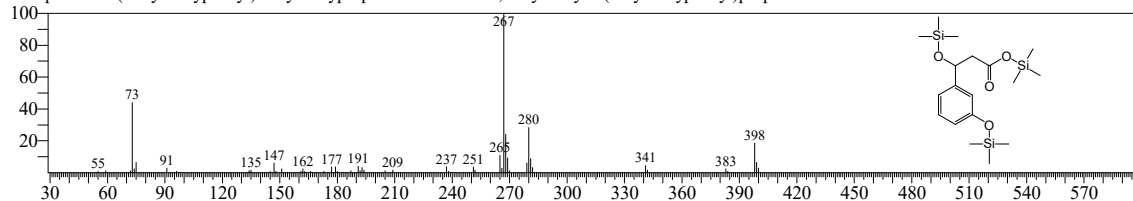

Hit#:5 Entry:506 Library:OA\_TMS\_DB5\_67min\_V3.lib

SI:25 Formula:C19H36N2O4Si3 CAS:2147-61-7 MolWeight:440 RetIndex:2375

CompName:3-Hydroxy-kynurenine-3TMS ; 2-amino-4-(2-amino-3-hydroxyphenyl)-4-oxobutanoic acid

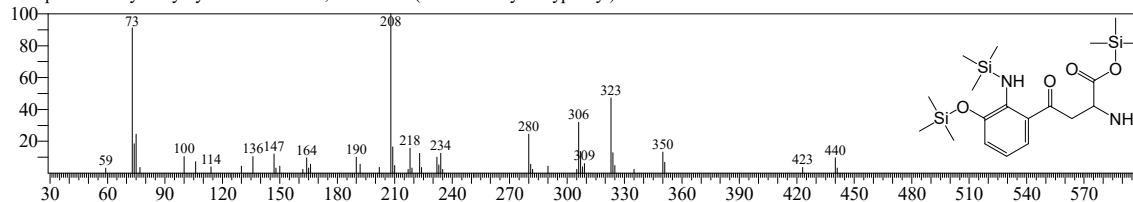

# TNAU

<< Target >>

Line#9 R.Time:28.395(Scan#:4780) MassPeaks:304

RawMode:Averaged 28.390-28.400(4779-4781) BasePeak:207.05(860)

BG Mode:Calc. from Peak Group 1 - Event 1 Q3 Scan

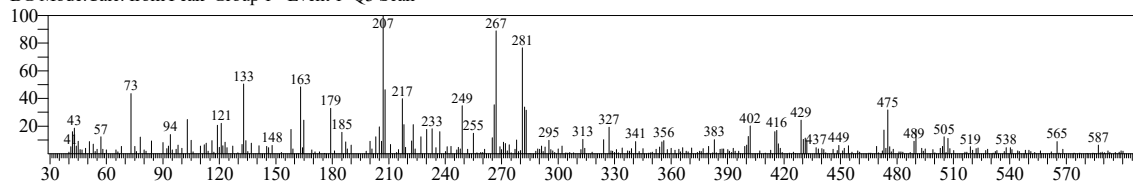

Hit#:1 Entry:179 Library:OA\_TMS\_DB5\_67min\_V3.lib

SI:37 Formula:C<sub>13</sub>H<sub>22</sub>O<sub>3</sub>Si<sub>2</sub> CAS:99-06-9 MolWeight:282 RetIndex:1572

CompName:3-Hydroxybenzoic acid-2TMS ; 3-hydroxybenzoic acid

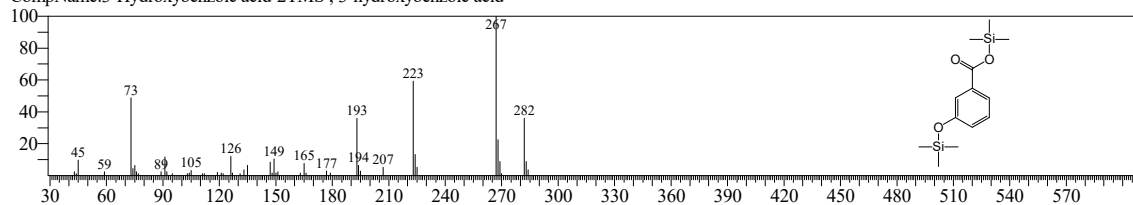

Hit#:2 Entry:211 Library:OA\_TMS\_DB5\_67min\_V3.lib

SI:36 Formula:C<sub>13</sub>H<sub>22</sub>O<sub>3</sub>Si<sub>2</sub> CAS:99-96-7 MolWeight:282 RetIndex:1636

CompName:4-Hydroxybenzoic acid-2TMS ; 4-hydroxybenzoic acid

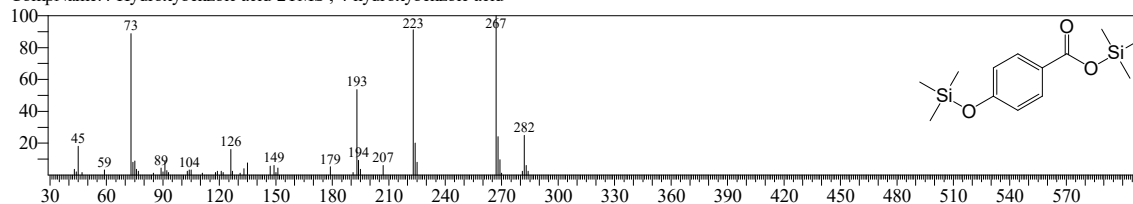

Hit#:3 Entry:328 Library:OA\_TMS\_DB5\_67min\_V3.lib

SI:33 Formula:C<sub>13</sub>H<sub>23</sub>NO<sub>2</sub>Si<sub>2</sub> CAS:150-13-0 MolWeight:281 RetIndex:1845

CompName:4-Aminobenzoic acid-2TMS ; 4-aminobenzoic acid

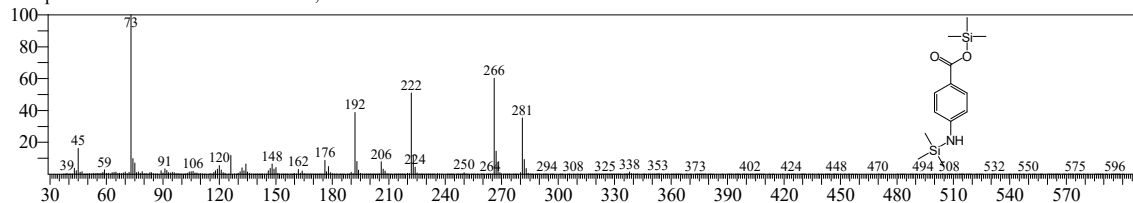

Hit#:4 Entry:535 Library:OA\_TMS\_DB5\_67min\_V3.lib

SI:31 Formula:C<sub>22</sub>H<sub>44</sub>N<sub>4</sub>O<sub>5</sub>Si<sub>4</sub> CAS:58-63-9 MolWeight:556 RetIndex:2605

CompName:Inosine-4TMS ; 9-[(2R,3R,4S,5R)-3,4-dihydroxy-5-(hydroxymethyl)oxolan-2-yl]-3H-purin-6-one

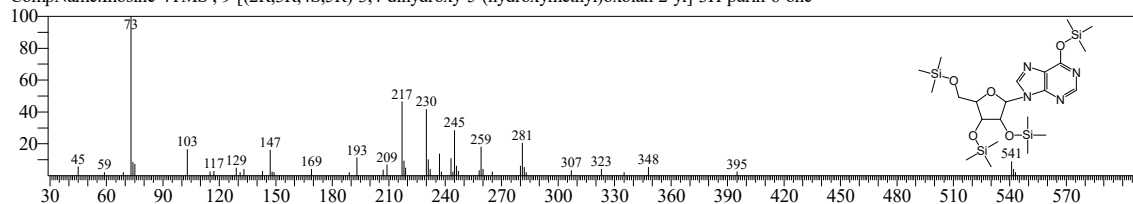

Hit#:5 Entry:203 Library:OA\_TMS\_DB5\_67min\_V3.lib

SI:30 Formula:C<sub>13</sub>H<sub>23</sub>NO<sub>2</sub>Si<sub>2</sub> CAS:118-92-3 MolWeight:281 RetIndex:1623

CompName:Anthranilic acid-2TMS ; 2-aminobenzoic acid

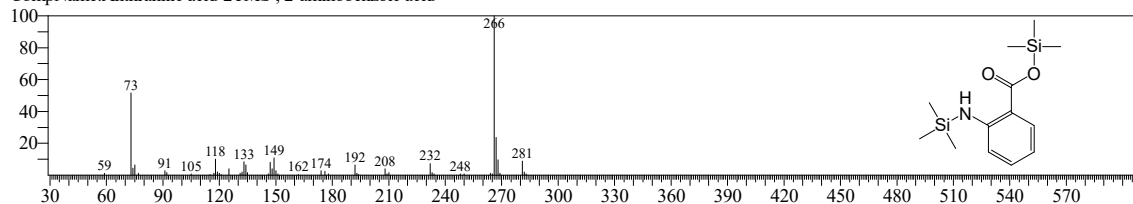

# TNAU

<< Target >>

Line#:10 R.Time:28.495(Scan#:4800) MassPeaks:279

RawMode:Averaged 28.490-28.500(4799-4801) BasePeak:281.05(592)

BG Mode:Calc. from Peak Group 1 - Event 1 Q3 Scan

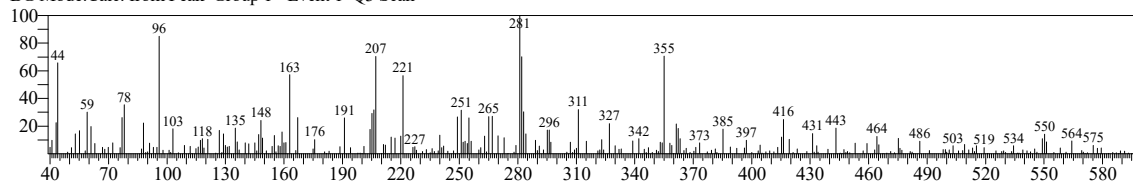

Hit#:1 Entry:402 Library:OA\_TMS\_DB5\_67min\_V3.lib

SI:29 Formula:C20H42O4Si4 CAS:775-01-9 MolWeight:458 RetIndex:1942

CompName:3,4-Dihydroxymandelic acid-4TMS ; 2-(3,4-dihydroxyphenyl)-2-hydroxyacetic acid

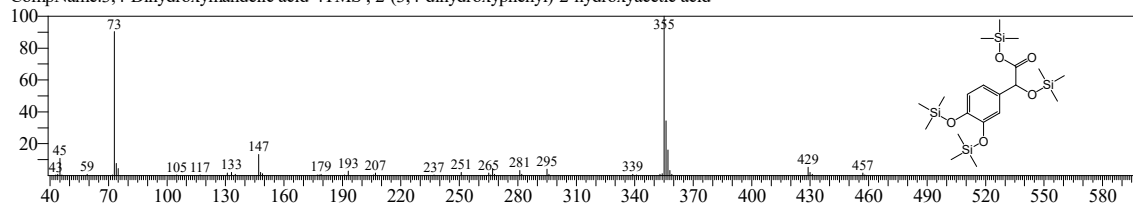

Hit#:2 Entry:308 Library:OA\_TMS\_DB5\_67min\_V3.lib

SI:27 Formula:C19H42O5Si4 CAS:138-59-0 MolWeight:462 RetIndex:1819

CompName:Shikimic acid-4TMS ; 3,4,5-trihydroxycyclohexene-1-carboxylic acid

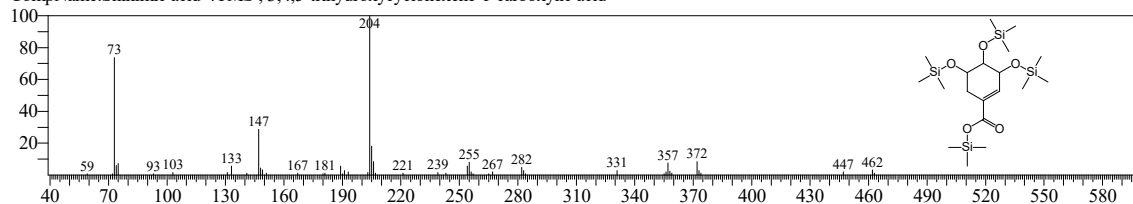

Hit#:3 Entry:341 Library:OA\_TMS\_DB5\_67min\_V3.lib

SI:24 Formula:C18H34O4Si3 CAS:3247-75-4 MolWeight:398 RetIndex:1864

CompName:3-(3-Hydroxyphenyl)-3-hydroxypropionic acid-3TMS ; 3-hydroxy-3-(3-hydroxyphenyl)propanoic acid

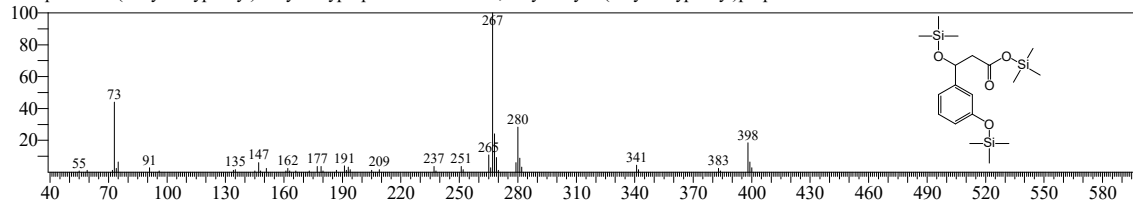

Hit#:4 Entry:179 Library:OA\_TMS\_DB5\_67min\_V3.lib

SI:24 Formula:C13H22O3Si2 CAS:99-06-9 MolWeight:282 RetIndex:1572

CompName:3-Hydroxybenzoic acid-2TMS ; 3-hydroxybenzoic acid

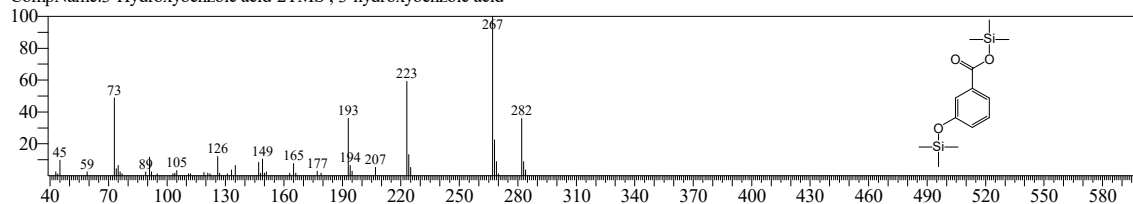

Hit#:5 Entry:339 Library:OA\_TMS\_DB5\_67min\_V3.lib

SI:24 Formula:C13H18O3Si CAS:458-36-6 MolWeight:250 RetIndex:1859

CompName:Coniferyl aldehyde-TMS ; (E)-3-(4-hydroxy-3-methoxyphenyl)prop-2-enal

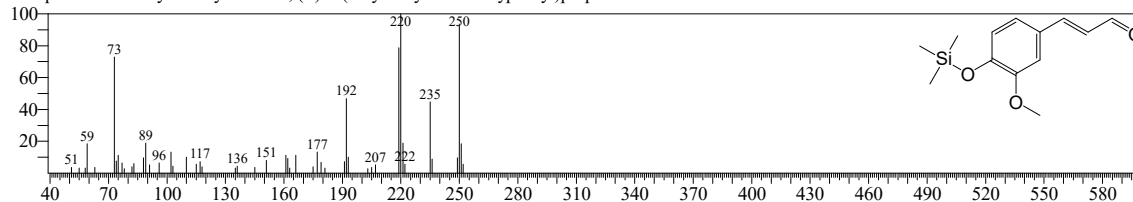

# TNAU

<< Target >>

Line#:11 R.Time:28.535(Scan#:4808) MassPeaks:292

RawMode:Averaged 28.530-28.540(4807-4809) BasePeak:281.05(756)

BG Mode:Calc. from Peak Group 1 - Event 1 Q3 Scan

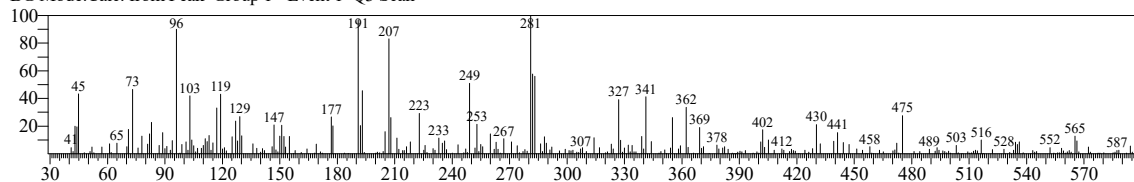

Hit#:1 Entry:539 Library:OA\_TMS\_DB5\_67min\_V3.lib

SI:33 Formula:C27H60O3Si2 CAS:544-62-7 MolWeight:488 RetIndex:2684

CompName:Batyl alcohol-2TMS ; 3-octadecoxypropane-1,2-diol

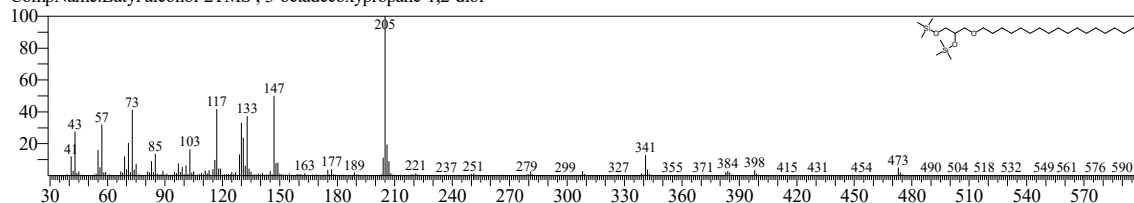

Hit#:2 Entry:77 Library:OA\_TMS\_DB5\_67min\_V3.lib

SI:33 Formula:C12H32O3Si3 CAS:56-81-5 MolWeight:308 RetIndex:1279

CompName:Glycerol-3TMS ; propane-1,2,3-triol

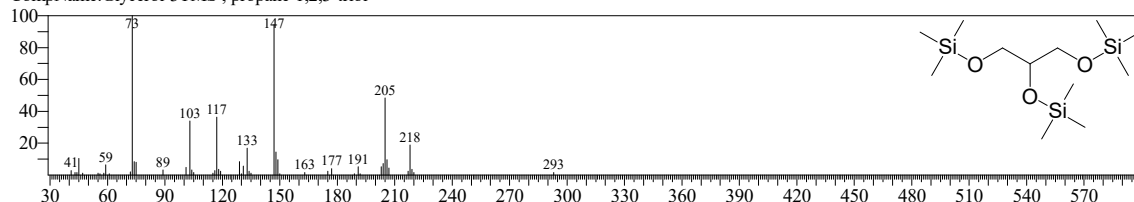

Hit#:3 Entry:328 Library:OA\_TMS\_DB5\_67min\_V3.lib

SI:32 Formula:C13H23NO2Si2 CAS:150-13-0 MolWeight:281 RetIndex:1845

CompName:4-Aminobenzoic acid-2TMS ; 4-aminobenzoic acid

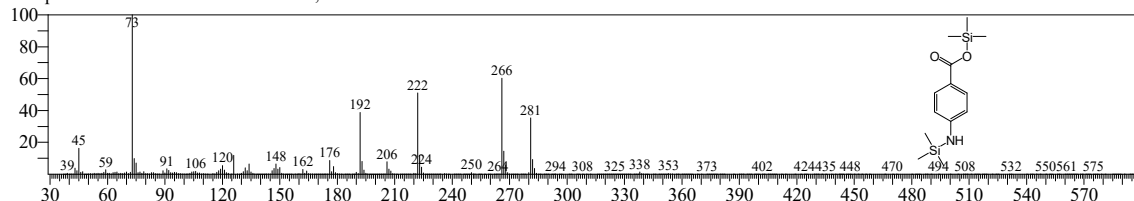

Hit#:4 Entry:402 Library:OA\_TMS\_DB5\_67min\_V3.lib

SI:31 Formula:C20H42O4Si4 CAS:775-01-9 MolWeight:458 RetIndex:1942

CompName:3,4-Dihydroxymandelic acid-4TMS ; 2-(3,4-dihydroxyphenyl)-2-hydroxyacetic acid

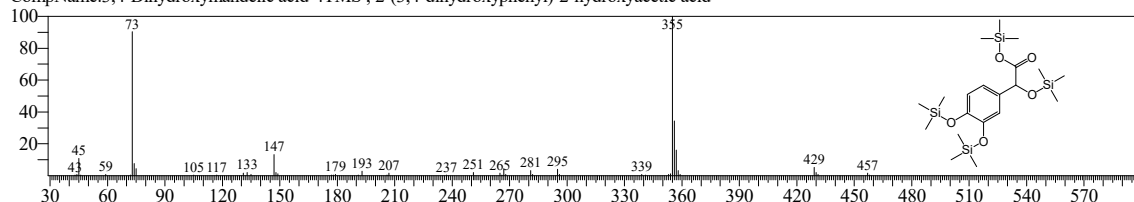

Hit#:5 Entry:290 Library:OA\_TMS\_DB5\_67min\_V3.lib

SI:31 Formula:C13H23NO3Si2 CAS:548-93-6 MolWeight:297 RetIndex:1773

CompName:3-Hydroxyanthranilic acid-2TMS ; 2-amino-3-hydroxybenzoic acid

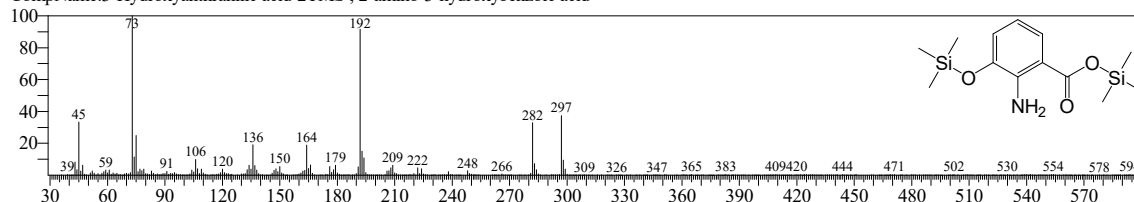

# TNAU

<< Target >>

Line#:12 R.Time:28.980(Scan#:4897) MassPeaks:292

RawMode:Averaged 28.975-28.985(4896-4898) BasePeak:193.00(755)

BG Mode:Calc. from Peak Group 1 - Event 1 Q3 Scan

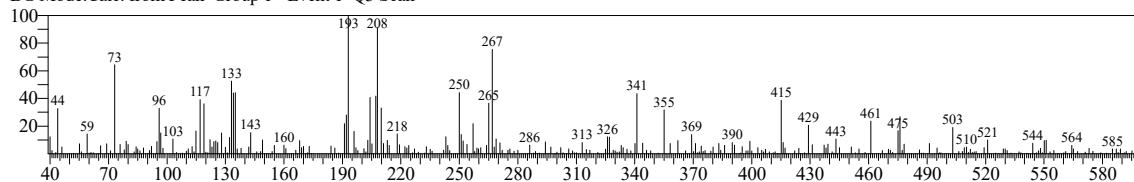

Hit#:1 Entry:238 Library:OA TMS DB5 67min V3.lib

SI:36 Formula:C17H42O5Si4 CAS:1114-34-7 MolWeight:438 RetIndex:1675

CompName:Lyxose-4TMS(2) ; (2S,3S,4R)-2,3,4,5-tetrahydroxypentanal

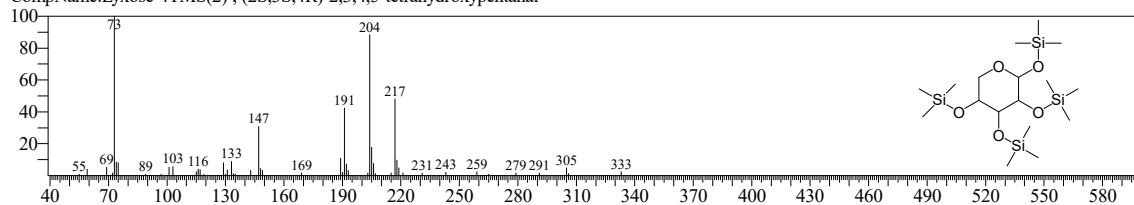

Hit#:2 Entry:295 Library:OA TMS DB5 67min V3.lib

SI:36 Formula:C17H42O5Si4 CAS:58-86-6 MolWeight:438 RetIndex:1784

CompName:Xylose-4TMS(2) ; (2R,3S,4R)-2,3,4,5-tetrahydroxypentanal

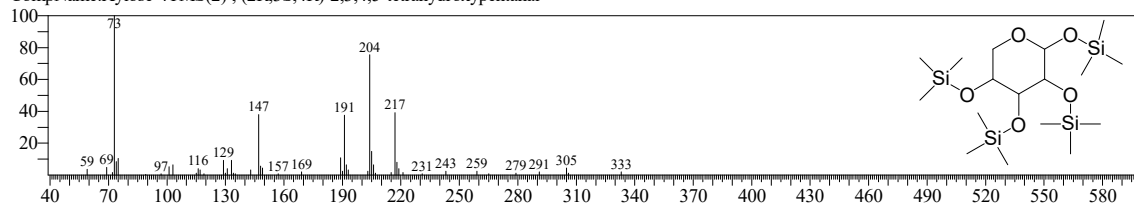

Hit#:3 Entry:150 Library:OA TMS DB5 67min V3.lib

SI:35 Formula:C15H26O3Si2 CAS:515-30-0 MolWeight:310 RetIndex:1517

CompName:2-Phenyllactic acid-2TMS ; 2-hydroxy-3-phenylpropanoic acid

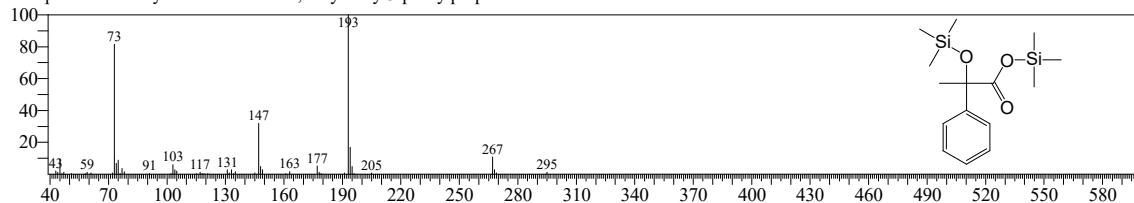

Hit#:4 Entry:232 Library:OA TMS DB5 67min V3.lib

SI:35 Formula:C17H42O5Si4 CAS:10323-20-3 MolWeight:438 RetIndex:1667

CompName:Arabinose-4TMS(2) ; (2S,3R,4R)-2,3,4,5-tetrahydroxypentanal

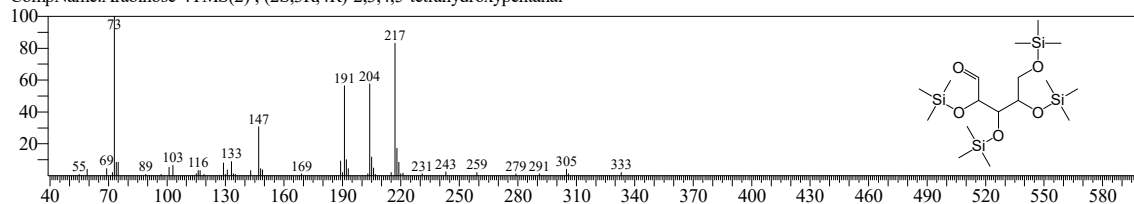

Hit#:5 Entry:261 Library:OA TMS DB5 67min V3.lib

SI:34 Formula:C18H44O5Si4 CAS:10485-94-6 MolWeight:452 RetIndex:1719

CompName:Rhamnose-4TMS(2) ; (2R,3R,4S,5S)-2,3,4,5-tetrahydroxyhexanal

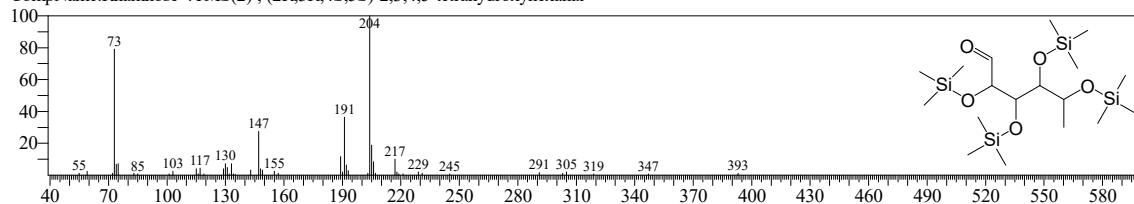

# TNAU

<< Target >>

Line#:13 R.Time:29.045(Scan#:4910) MassPeaks:294

RawMode:Averaged 29.040-29.050(4909-4911) BasePeak:207.05(1087)

BG Mode:Calc. from Peak Group 1 - Event 1 Q3 Scan

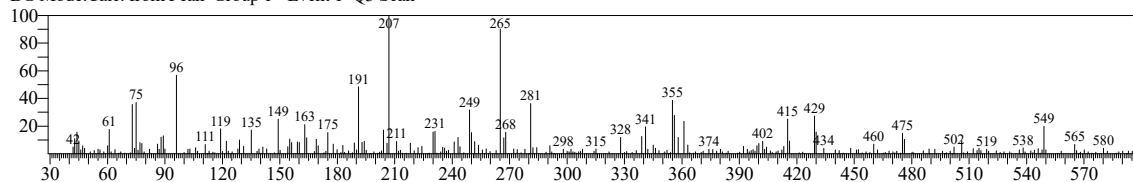

Hit#:1 Entry:402 Library:OA\_TMS\_DB5\_67min\_V3.lib

SI:41 Formula:C20H42O4Si4 CAS:775-01-9 MolWeight:458 RetIndex:1942

CompName:3,4-Dihydroxymandelic acid-4TMS ; 2-(3,4-dihydroxyphenyl)-2-hydroxyacetic acid

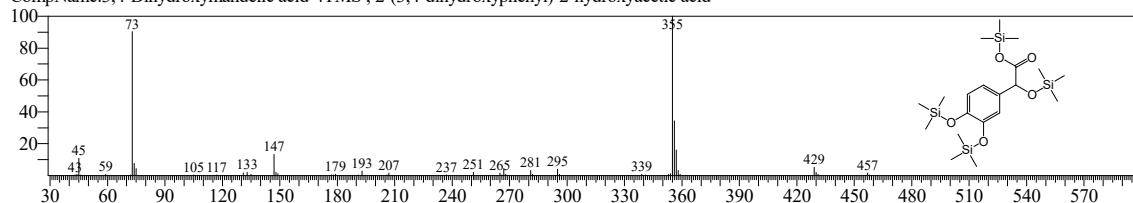

Hit#:2 Entry:343 Library:OA\_TMS\_DB5\_67min\_V3.lib

SI:40 Formula:C18H37NO3Si3 CAS:51-43-4 MolWeight:399 RetIndex:1868

CompName:Epinephrine-3TMS ; 4-[(1R)-1-hydroxy-2-(methylamino)ethyl]benzene-1,2-diol

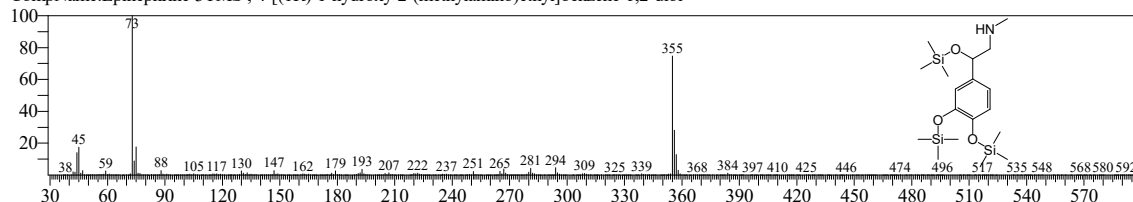

Hit#:3 Entry:310 Library:OA\_TMS\_DB5\_67min\_V3.lib

SI:35 Formula:C11H20N4OSi2 CAS:68-94-0 MolWeight:280 RetIndex:1822

CompName:Hypoxanthine-2TMS ; 3,7-dihydropurin-6-one

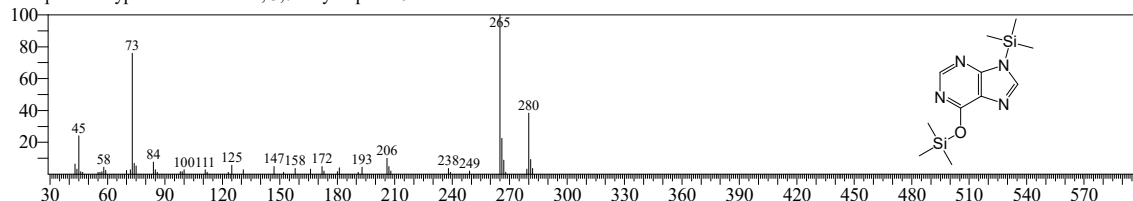

Hit#:4 Entry:311 Library:OA\_TMS\_DB5\_67min\_V3.lib

SI:32 Formula:C21H52O6Si5 CAS:59-23-4 MolWeight:540 RetIndex:1824

CompName:Galactose-5TMS(1) ; (3R,4S,5R,6R)-6-(hydroxymethyl)oxane-2,3,4,5-tetrol

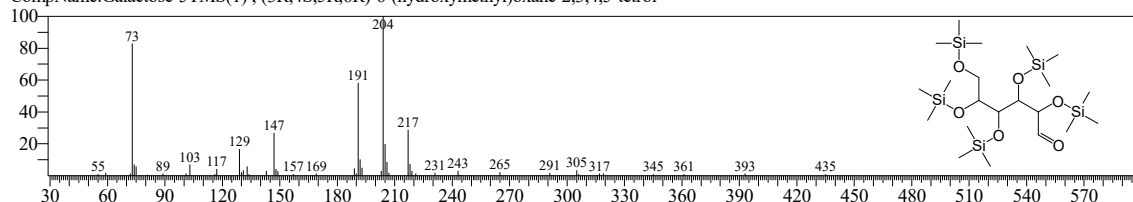

Hit#:5 Entry:386 Library:OA\_TMS\_DB5\_67min\_V3.lib

SI:32 Formula:C21H52O6Si5 CAS:50-99-7 MolWeight:540 RetIndex:1922

CompName:Glucose-5TMS(1) ; (3R,4S,5S,6R)-6-(hydroxymethyl)oxane-2,3,4,5-tetrol

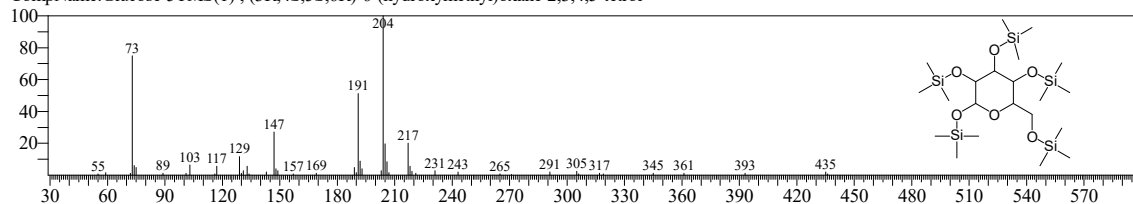

# TNAU

<< Target >>

Line#:14 R.Time:29.330(Scan#:4967) MassPeaks:303

RawMode:Averaged 29.325-29.335(4966-4968) BasePeak:73.10(895)

BG Mode:Calc. from Peak Group 1 - Event 1 Q3 Scan

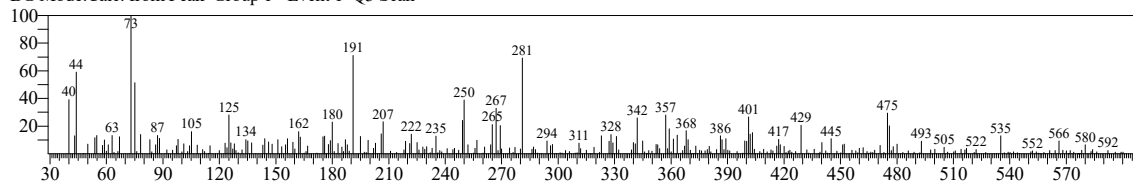

Hit#:1 Entry:310 Library:OA\_TMS\_DB5\_67min\_V3.lib

SI:35 Formula:C11H20N4OSi2 CAS:68-94-0 MolWeight:280 RetIndex:1822

CompName:Hypoxanthine-2TMS ; 3,7-dihydropurin-6-one

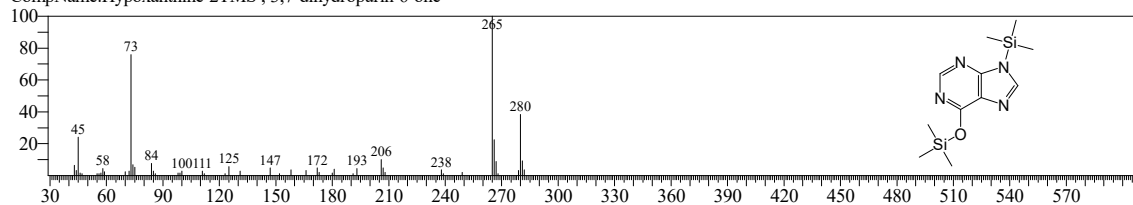

Hit#:2 Entry:343 Library:OA\_TMS\_DB5\_67min\_V3.lib

SI:34 Formula:C18H37NO3Si3 CAS:51-43-4 MolWeight:399 RetIndex:1868

CompName:Epinephrine-3TMS ; 4-[(1R)-1-hydroxy-2-(methylamino)ethyl]benzene-1,2-diol

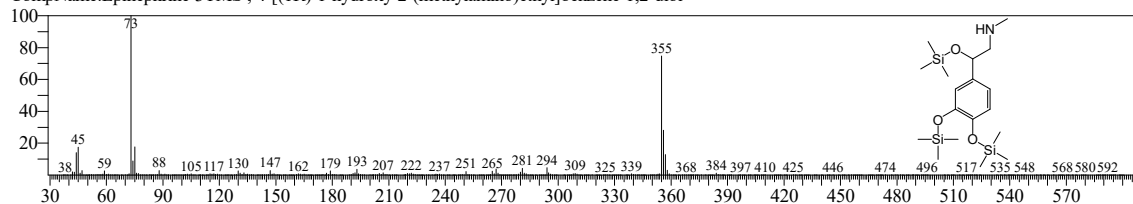

Hit#:3 Entry:328 Library:OA\_TMS\_DB5\_67min\_V3.lib

SI:32 Formula:C13H23NO2Si2 CAS:150-13-0 MolWeight:281 RetIndex:1845

CompName:4-Aminobenzoic acid-2TMS ; 4-aminobenzoic acid



Hit#:4 Entry:200 Library:OA\_TMS\_DB5\_67min\_V3.lib

SI:31 Formula:C14H24O3Si2 CAS:621-37-4 MolWeight:296 RetIndex:1617

CompName:3-Hydroxyphenylacetic acid-2TMS ; 2-(3-hydroxyphenyl)acetic acid

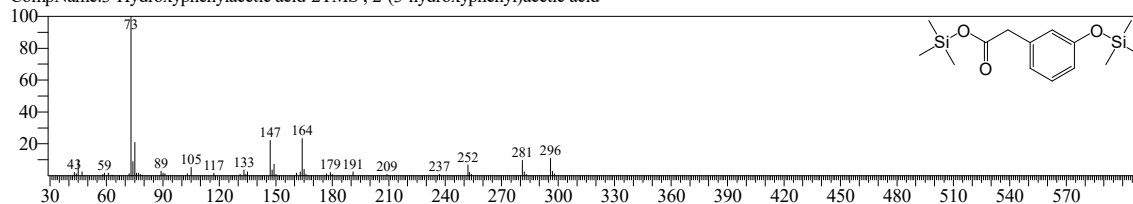

Hit#:5 Entry:330 Library:OA\_TMS\_DB5\_67min\_V3.lib

SI:30 Formula:C12H17NO3Si CAS:66407-11-2 MolWeight:251 RetIndex:1849

CompName:Hippuric acid-TMS ; 2-benzamidoacetic acid

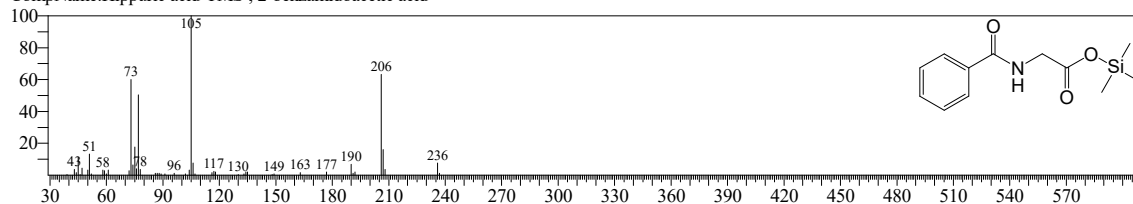

# TNAU

<< Target >>

Line#:15 R.Time:30.760(Scan#:5253) MassPeaks:296

RawMode:Averaged 30.755-30.765(5252-5254) BasePeak:207.05(2676)

BG Mode:Calc. from Peak Group 1 - Event 1 Q3 Scan

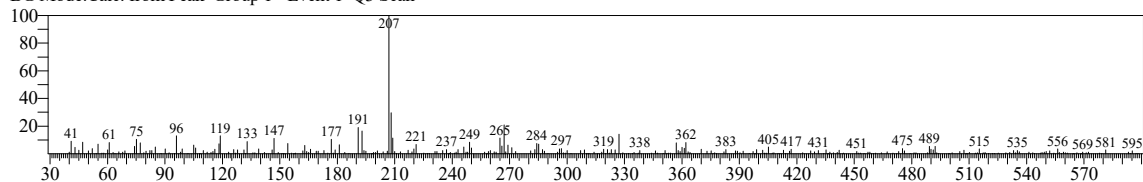

Hit#:1 Entry:330 Library:OA TMS DB5\_67min\_V3.lib

SI:34 Formula:C<sub>12</sub>H<sub>17</sub>NO<sub>3</sub>Si CAS:66407-11-2 MolWeight:251 RetIndex:1849

CompName:Hippuric acid-TMS ; 2-benzamidoacetic acid

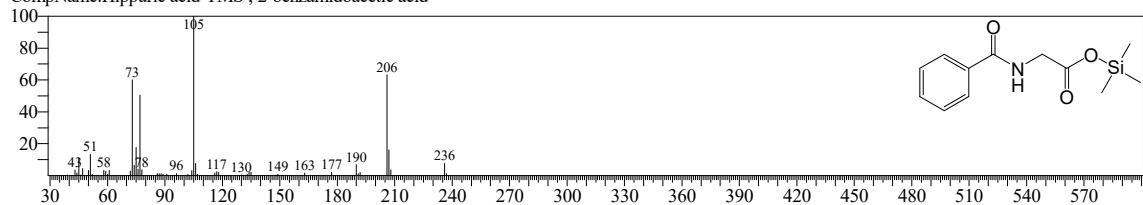

Hit#:2 Entry:310 Library:OA TMS DB5\_67min\_V3.lib

SI:32 Formula:C<sub>11</sub>H<sub>20</sub>N<sub>4</sub>O<sub>2</sub>Si CAS:68-94-0 MolWeight:280 RetIndex:1822

CompName:Hypoxanthine-2TMS ; 3,7-dihydropurin-6-one

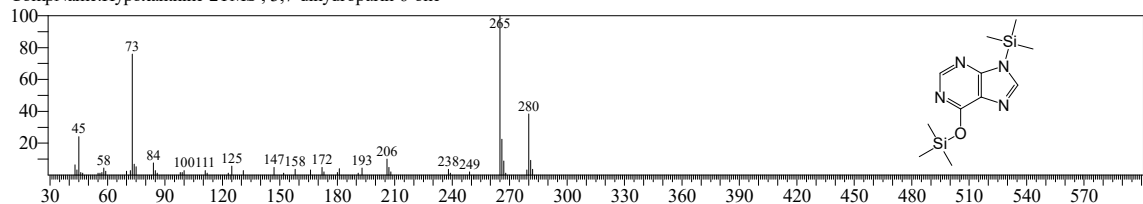

Hit#:3 Entry:179 Library:OA TMS DB5\_67min\_V3.lib

SI:31 Formula:C<sub>13</sub>H<sub>22</sub>O<sub>3</sub>Si<sub>2</sub> CAS:99-06-9 MolWeight:282 RetIndex:1572

CompName:3-Hydroxybenzoic acid-2TMS ; 3-hydroxybenzoic acid

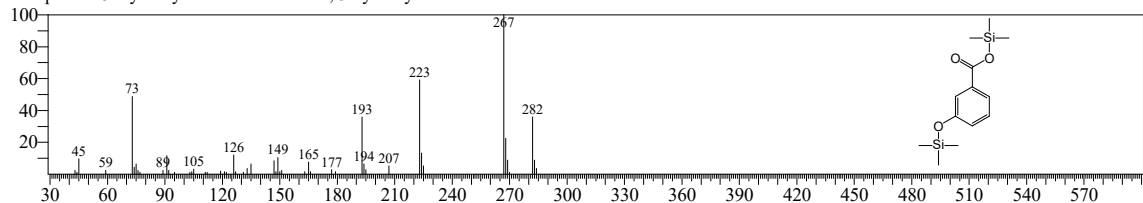

Hit#:4 Entry:211 Library:OA TMS DB5\_67min\_V3.lib

SI:31 Formula:C<sub>13</sub>H<sub>22</sub>O<sub>3</sub>Si<sub>2</sub> CAS:99-96-7 MolWeight:282 RetIndex:1636

CompName:4-Hydroxybenzoic acid-2TMS ; 4-hydroxybenzoic acid

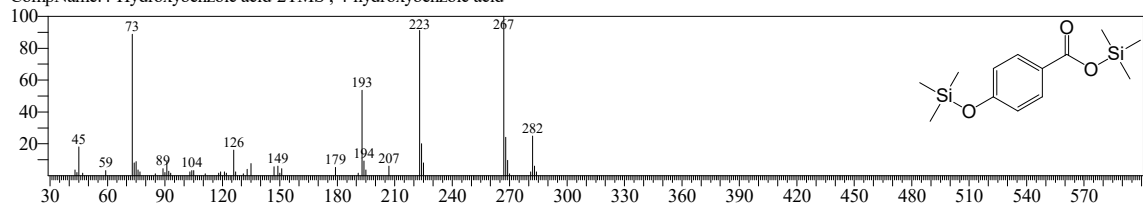

Hit#:5 Entry:203 Library:OA TMS DB5\_67min\_V3.lib

SI:31 Formula:C<sub>13</sub>H<sub>23</sub>NO<sub>2</sub>Si<sub>2</sub> CAS:118-92-3 MolWeight:281 RetIndex:1623

CompName:Anthranilic acid-2TMS ; 2-aminobenzoic acid

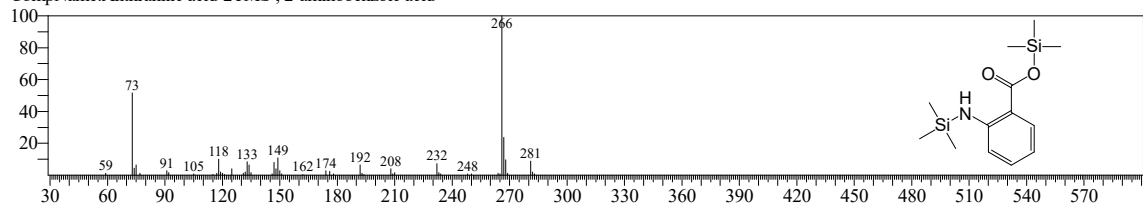



# TNAU

<< Target >>

Line#:16 R.Time:31.420(Scan#:5385) MassPeaks:306

RawMode:Averaged 31.415-31.425(5384-5386) BasePeak:132.95(792)

BG Mode:Calc. from Peak Group 1 - Event 1 Q3 Scan

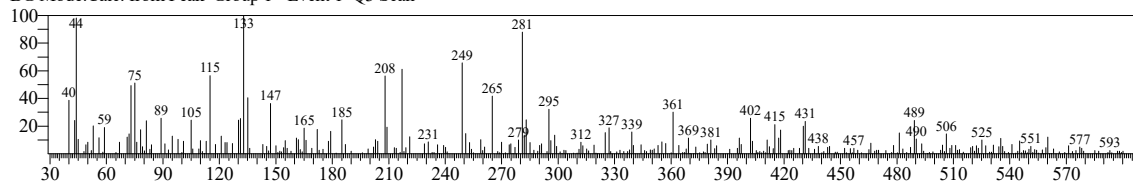

Hit#:1 Entry:138 Library:OA\_TMS\_DB5\_67min\_V3.lib

SI:33 Formula:C<sub>14</sub>H<sub>24</sub>O<sub>3</sub>Si<sub>2</sub> CAS:90-64-2 MolWeight:296 RetIndex:1486

CompName:Mandelic acid-2TMS ; 2-hydroxy-2-phenylacetic acid

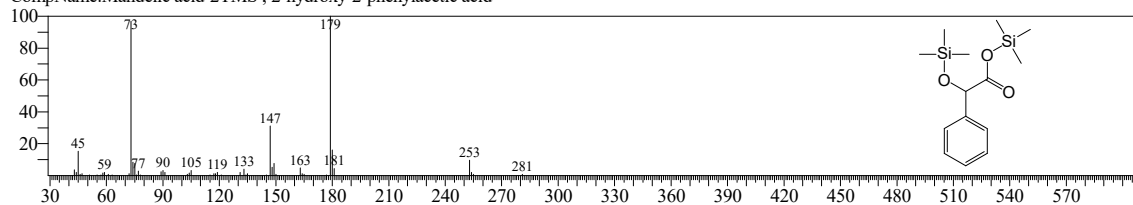

Hit#:2 Entry:200 Library:OA\_TMS\_DB5\_67min\_V3.lib

SI:33 Formula:C<sub>14</sub>H<sub>24</sub>O<sub>3</sub>Si<sub>2</sub> CAS:621-37-4 MolWeight:296 RetIndex:1617

CompName:3-Hydroxyphenylacetic acid-2TMS ; 2-(3-hydroxyphenyl)acetic acid

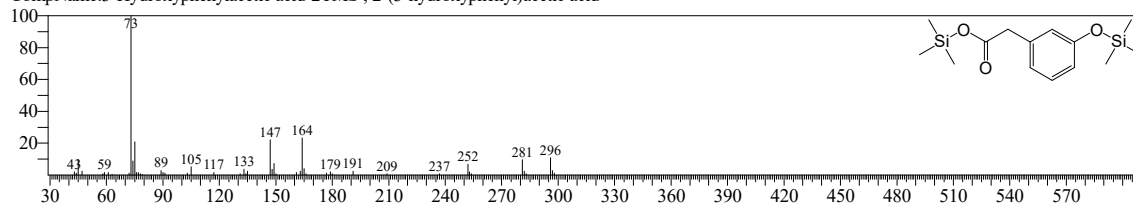

Hit#:3 Entry:184 Library:OA\_TMS\_DB5\_67min\_V3.lib

SI:33 Formula:C<sub>14</sub>H<sub>24</sub>O<sub>3</sub>Si<sub>2</sub> CAS:614-75-5 MolWeight:296 RetIndex:1579

CompName:2-Hydroxyphenylacetic acid-2TMS ; 2-(2-hydroxyphenyl)acetic acid

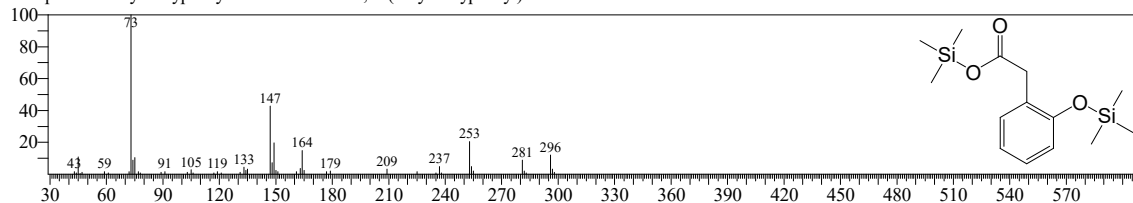

Hit#:4 Entry:384 Library:OA\_TMS\_DB5\_67min\_V3.lib

SI:33 Formula:C<sub>17</sub>H<sub>35</sub>NO<sub>3</sub>Si<sub>3</sub> CAS:65-23-6 MolWeight:385 RetIndex:1919

CompName:Pyridoxine-3TMS ; 4,5-bis(hydroxymethyl)-2-methylpyridin-3-ol

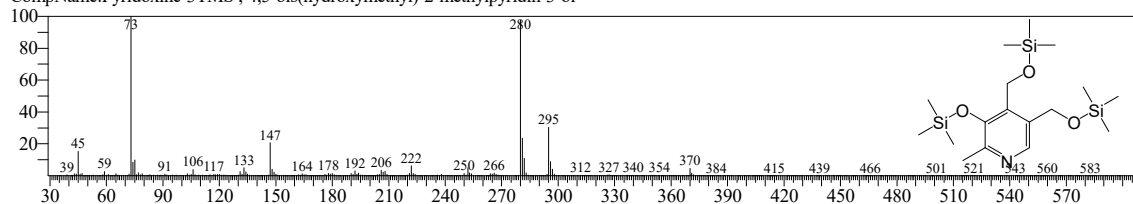

Hit#:5 Entry:382 Library:OA\_TMS\_DB5\_67min\_V3.lib

SI:32 Formula:C<sub>18</sub>H<sub>34</sub>O<sub>4</sub>Si<sub>3</sub> CAS:6482-98-0 MolWeight:398 RetIndex:1918

CompName:4-Hydroxyphenyllactic acid-3TMS ; 2-hydroxy-3-(4-hydroxyphenyl)propanoate

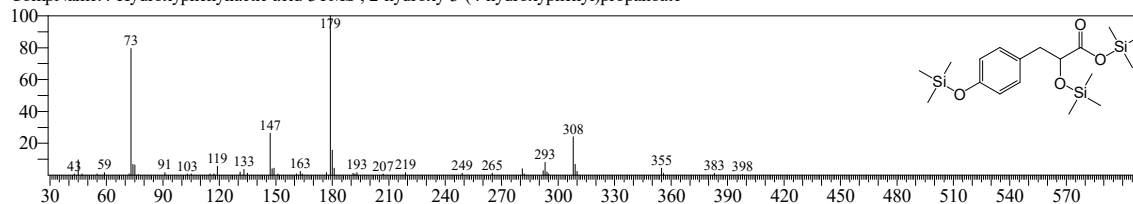

# TNAU

<< Target >>

Line#:17 R.Time:31.915(Scan#:5484) MassPeaks:343

RawMode:Averaged 31.910-31.920(5483-5485) BasePeak:139.10(1396)

BG Mode:Calc. from Peak Group 1 - Event 1 Q3 Scan

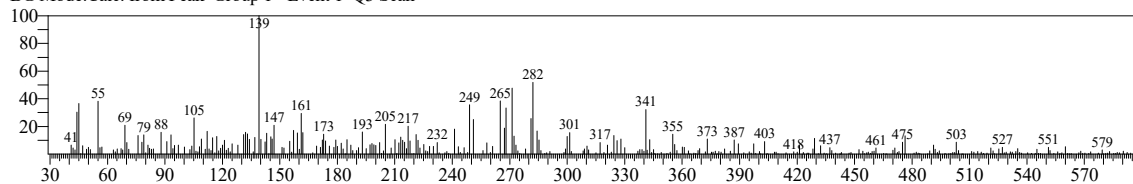

Hit#:1 Entry:38 Library:FA\_ME\_SP2560\_EI\_V3.lib

SI:28 Formula:C23H34O2 CAS:6217-54-5 MolWeight:342 RetIndex:3514

CompName:Methyl cis-4,7,10,13,16,19-Docosahexanoate ; Docosa-4,7,10,13,16,19-hexanoic acid

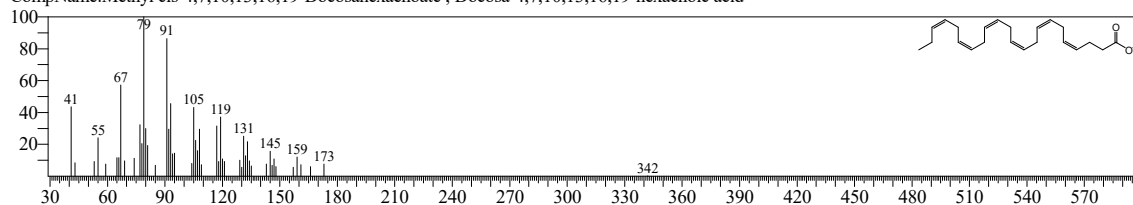

Hit#:2 Entry:534 Library:OA\_TMS\_DB5\_67min\_V3.lib

SI:28 Formula:C25H42O2Si CAS:24880-45-3 MolWeight:402 RetIndex:2591

CompName:Docosapentaenoic acid-TMS ; (7Z,10Z,13Z,16Z,19Z)-docosa-7,10,13,16,19-pentaenoic acid

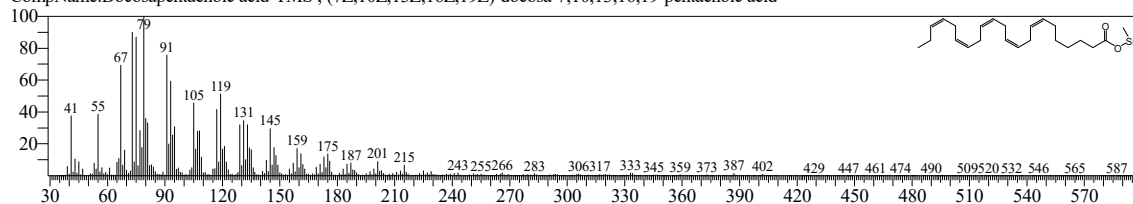

Hit#:3 Entry:509 Library:OA\_TMS\_DB5\_67min\_V3.lib

SI:28 Formula:C23H38O2Si CAS:10417-94-4 MolWeight:374 RetIndex:2389

CompName:Eicosapentaenoic acid-TMS ; icoso-5,8,11,14,17-pentaenoic acid

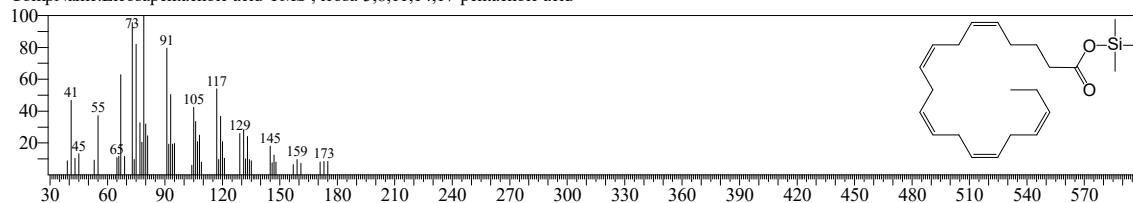

Hit#:4 Entry:171 Library:OA\_TMS\_DB5\_67min\_V3.lib

SI:26 Formula:C12H16O2Si CAS:140-10-3 MolWeight:220 RetIndex:1552

CompName:Cinnamic acid-TMS ; (E)-3-phenylprop-2-enoic acid

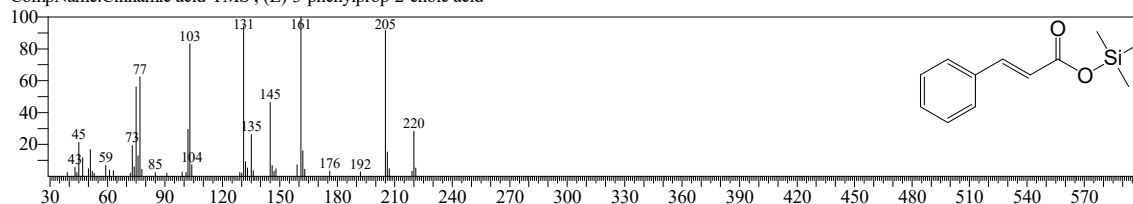

Hit#:5 Entry:341 Library:OA\_TMS\_DB5\_67min\_V3.lib

SI:26 Formula:C18H34O4Si3 CAS:3247-75-4 MolWeight:398 RetIndex:1864

CompName:3-(3-Hydroxyphenyl)-3-hydroxypropionic acid-3TMS ; 3-hydroxy-3-(3-hydroxyphenyl)propanoic acid

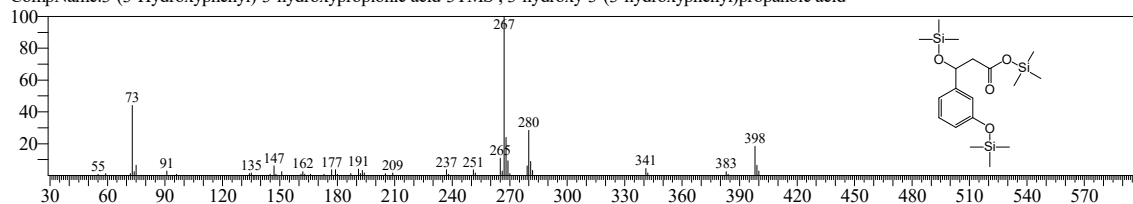

Supplement: Supplementary file 60 [file supplementary]
