# Supplementary material for: Comparative Metabolomics Profiling Reveals Key Metabolites and Associated Pathways Regulating Tuber Dormancy in White Yam (<em>Dioscorea rotundata</em>)
Source: Preprints.org preprint supplement (doi:10.20944/preprints202303.0378.v1), 2023-03-21

# TNAU

## Sample Information

Analyzed by : Admin  
 Analyzed : 05-Aug-22 6:32:15 AM  
 Sample Type : Unknown  
 Level # : 1  
 Sample Name : T42-1  
 Sample ID : T42-1  
 IS Amount : [1]=1  
 Sample Amount : 1  
 Dilution Factor : 1  
 Vial # : 21  
 Injection Volume : 1.00  
 Data File : D:\GCMS-8040NX\Aug 2022\Users\04.08.2022\Data files\04082022-022.qgd  
 Org Data File : D:\GCMS-8040NX\Aug 2022\Users\04.08.2022\Data files\04082022-022.qgd  
 Method File : D:\GCMS-8040NX\Aug 2022\Users\04.08.2022\Method file\27072022\_methodfile.qgm  
 Org Method File : D:\GCMS-8040NX\Aug 2022\Users\04.08.2022\Method file\27072022\_methodfile.qgm  
 Report File :  
 Tuning File : D:\GCMS-8040NX\Aug 2022\Tuning Data\TUNING 04082022.qgt  
 [Comment]  
 Jerry samples  
 Modified by : Admin  
 Modified : 05-Aug-22 4:42:00 PM

Chromatogram T42-1 D:\GCMS-8040NX\Aug 2022\Users\04.08.2022\Data files\04082022-022.qgd

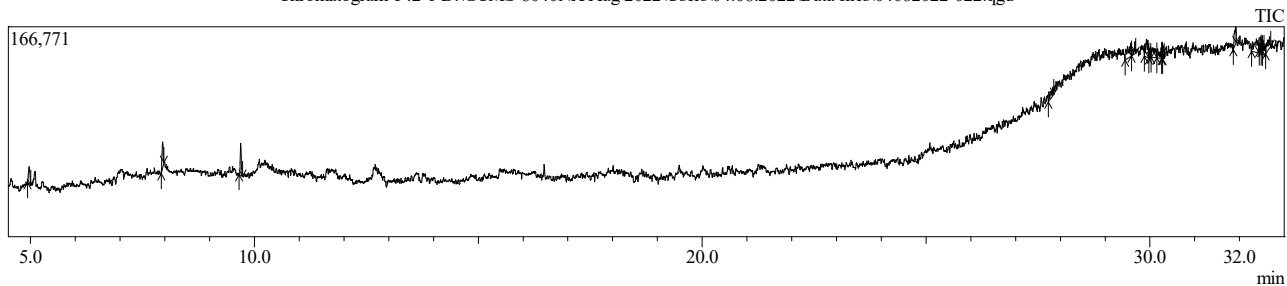

Peak Report TIC

| Peak# | R.Time | Area   | Area%  | Height | Height% | A/H  | Similarity | Name                                    |
|-------|--------|--------|--------|--------|---------|------|------------|-----------------------------------------|
| 1     | 4.967  | 31501  | 5.86   | 13870  | 6.74    | 2.27 | 71         | 2-Propanol, 1,1'-oxybis-                |
| 2     | 7.948  | 39836  | 7.42   | 21081  | 10.24   | 1.89 | 86         | Undecane                                |
| 3     | 9.693  | 42089  | 7.84   | 25424  | 12.35   | 1.66 | 90         | Dodecane                                |
| 4     | 27.740 | 25973  | 4.84   | 6710   | 3.26    | 3.87 | 40         | Epinephrine-3TMS                        |
| 5     | 29.571 | 51833  | 9.65   | 10707  | 5.20    | 4.84 | 33         | 3,4-Dihydroxymandelic acid-4TMS         |
| 6     | 29.665 | 20962  | 3.90   | 9798   | 4.76    | 2.14 | 32         | Hypoxanthine-2TMS                       |
| 7     | 29.924 | 50923  | 9.48   | 13982  | 6.79    | 3.64 | 33         | 3,4-Dihydroxymandelic acid-4TMS         |
| 8     | 30.008 | 13511  | 2.52   | 8888   | 4.32    | 1.52 | 38         | 3,4-Dihydroxymandelic acid-4TMS         |
| 9     | 30.040 | 42415  | 7.90   | 6178   | 3.00    | 6.87 | 36         | 3,4-Dihydroxymandelic acid-4TMS         |
| 10    | 30.165 | 26813  | 4.99   | 6971   | 3.39    | 3.85 | 28         | 2-Phenyllactic acid-2TMS                |
| 11    | 30.272 | 14489  | 2.70   | 12842  | 6.24    | 1.13 | 34         | Anthranilic acid-2TMS                   |
| 12    | 30.305 | 11412  | 2.12   | 8774   | 4.26    | 1.30 | 41         | Rhamnose-4TMS(2)                        |
| 13    | 31.910 | 36567  | 6.81   | 13965  | 6.78    | 2.62 | 29         | Glyceraldehyde 3-phosphate-meto-3TMS(2) |
| 14    | 32.379 | 60150  | 11.20  | 10603  | 5.15    | 5.67 | 33         | 2-Deoxy-glucose-4TMS(1)                 |
| 15    | 32.460 | 16795  | 3.13   | 10346  | 5.03    | 1.62 | 41         | Epinephrine-3TMS                        |
| 16    | 32.498 | 9067   | 1.69   | 8851   | 4.30    | 1.02 | 45         | 4-Hydroxybenzoic acid-2TMS              |
| 17    | 32.530 | 8207   | 1.53   | 7995   | 3.88    | 1.03 | 37         | Anthranilic acid-2TMS                   |
| 18    | 32.670 | 34566  | 6.44   | 8874   | 4.31    | 3.90 | 28         | 4-Hydroxybutyric acid-2TMS              |
|       |        | 537109 | 100.00 | 205859 | 100.00  |      |            |                                         |

Library

# TNAU

<< Target >>

Line#:1 R.Time:4.965(Scan#:94) MassPeaks:286

RawMode:Averaged 4.960-4.970(93-95) BasePeak:89.05(2793)

BG Mode:Calc. from Peak Group 1 - Event 1 Q3 Scan

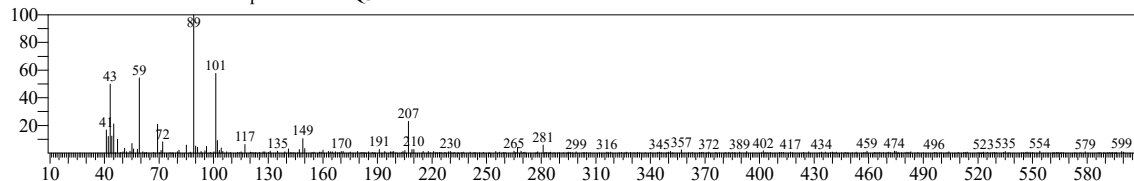

Hit#:1 Entry:7425 Library:NIST20R.lib

SI:71 Formula:C6H14O3 CAS:110-98-5 MolWeight:134 RetIndex:1018

CompName:2-Propanol, 1,1'-oxybis- 2-Propanol, 1,1'-oxydi- Bis(2-hydroxypropyl) ether 1,1'-Oxydi-2-propanol 2,2'-Dihydroxydipropyl ether

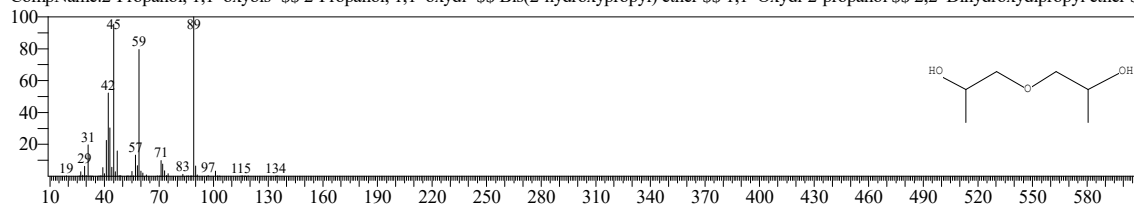

Hit#:2 Entry:1 Library:FA\_ME\_SP2560\_EI\_V3.lib

SI:51 Formula:C5H10O2 CAS:107-92-6 MolWeight:102 RetIndex:1113

CompName:Methyl butanoate ; Butanoic acid

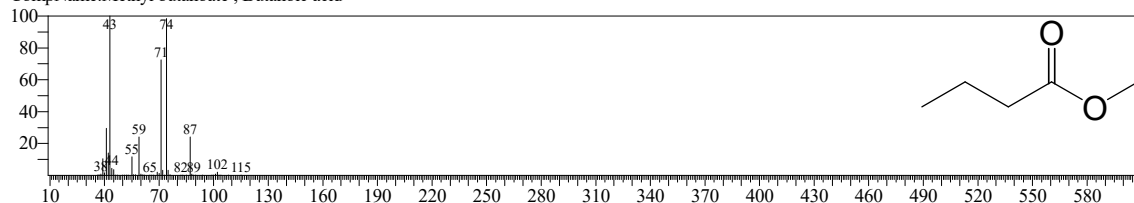

Hit#:3 Entry:1 Library:OA\_TMS\_DB5\_67min\_V3.lib

SI:43 Formula:C7H17NO2Si CAS:1118-68-9 MolWeight:175 RetIndex:990

CompName:Dimethylglycine-TMS ; 2-(dimethylamino)acetic acid

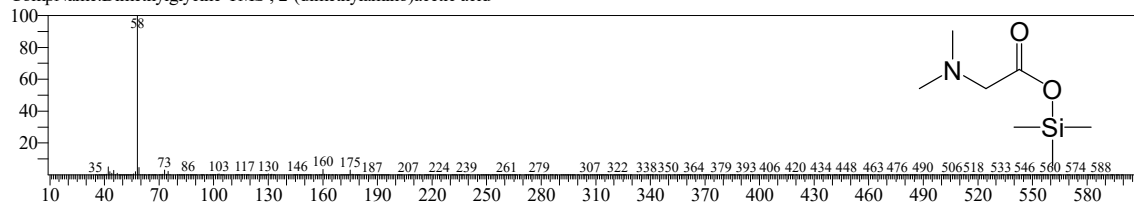

Hit#:4 Entry:13 Library:OA\_TMS\_DB5\_67min\_V3.lib

SI:41 Formula:C8H20O3Si2 CAS:79-14-1 MolWeight:220 RetIndex:1074

CompName:Glycolic acid-2TMS ; 2-hydroxyacetic acid

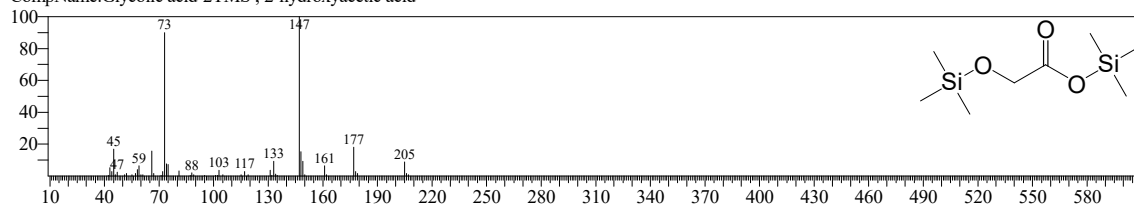

Hit#:5 Entry:35 Library:OA\_TMS\_DB5\_67min\_V3.lib

SI:40 Formula:C10H24O3Si2 CAS:300-85-6 MolWeight:248 RetIndex:1161

CompName:3-Hydroxybutyric acid-2TMS ; 3-hydroxybutanoic acid

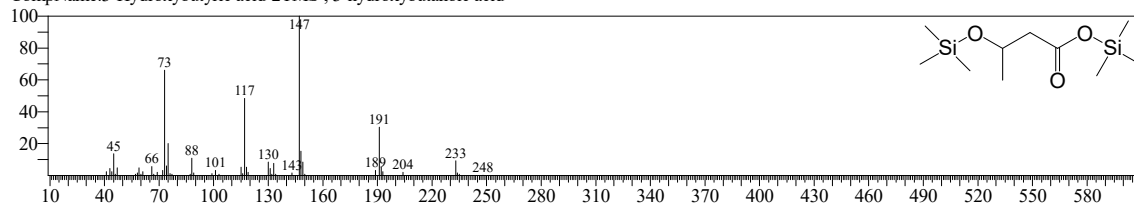

# TNAU

<< Target >>

Line#:2 R.Time:7.945(Scan#:690) MassPeaks:305

RawMode:Averaged 7.940-7.950(689-691) BasePeak:57.10(4812)

BG Mode:Calc. from Peak Group 1 - Event 1 Q3 Scan

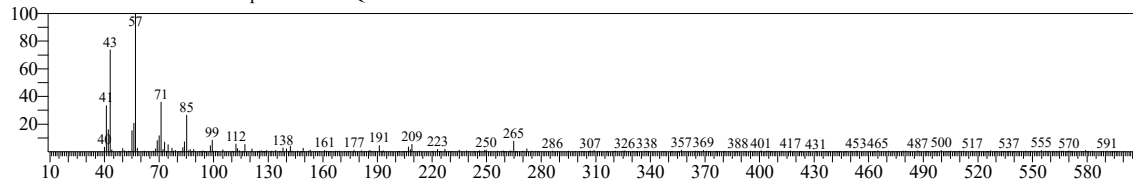

Hit#:1 Entry:12897 Library:NIST20R.lib

SI:86 Formula:C11H24 CAS:1120-21-4 MolWeight:156 RetIndex:1100

CompName:Undecane \$\$ n-Undecane \$\$ Hendecane \$\$ n-C11H24 \$\$ UN 2330

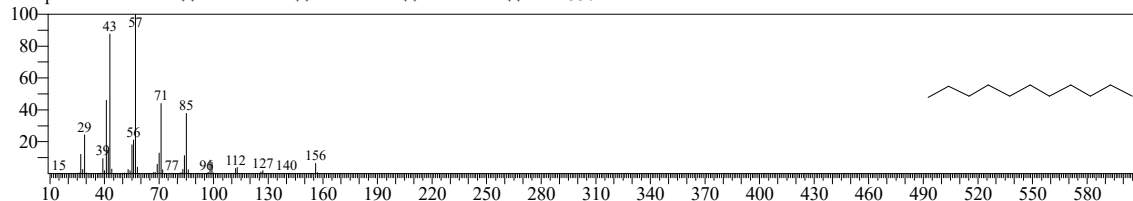

Hit#:2 Entry:9445 Library:NIST20R.lib

SI:86 Formula:C10H22 CAS:124-18-5 MolWeight:142 RetIndex:1000

CompName:Decane \$\$ n-Decane \$\$ n-C10H22 \$\$ UN 2247

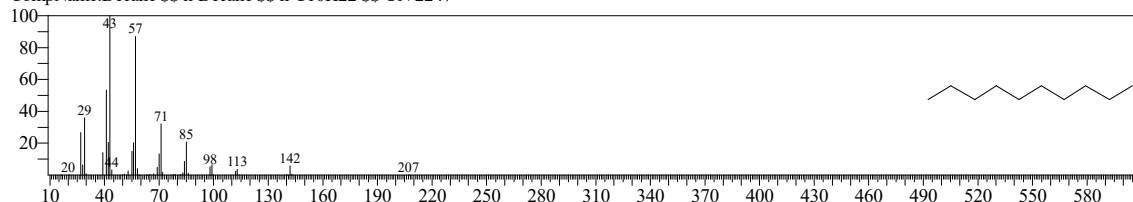

Hit#:3 Entry:30057 Library:NIST20M1.lib

SI:86 Formula:C12H26 CAS:112-40-3 MolWeight:170 RetIndex:1200

CompName:Dodecane \$\$ n-Dodecane \$\$ Adakane 12 \$\$ Ba 51-090453 \$\$ CH3(CH2)10CH3 \$\$ Bihexyl \$\$ Dihexyl \$\$ Duodecane \$\$ NSC 8714

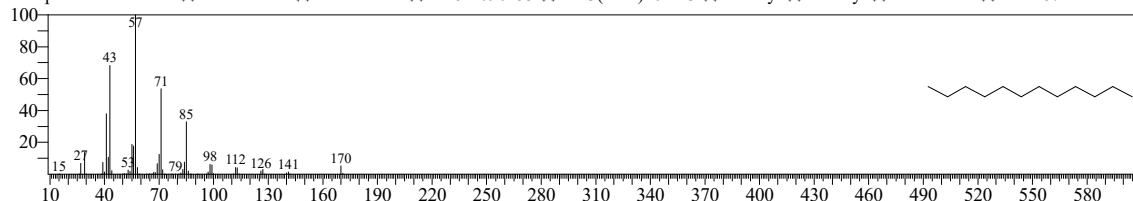

Hit#:4 Entry:40226 Library:NIST20M1.lib

SI:85 Formula:C13H28 CAS:629-50-5 MolWeight:184 RetIndex:1300

CompName:Tridecane \$\$ n-Tridecane \$\$ Tridecane, n-

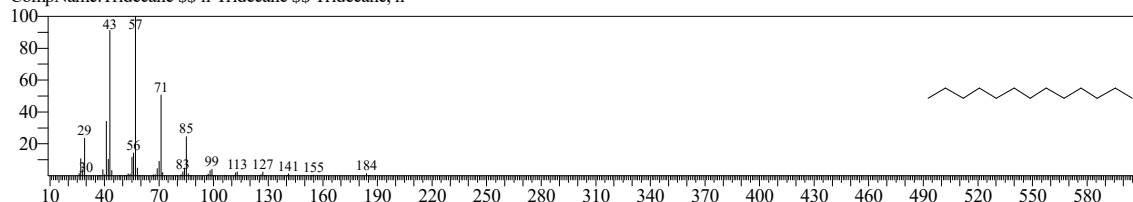

Hit#:5 Entry:27737 Library:NIST20R.lib

SI:85 Formula:C16H34 CAS:544-76-3 MolWeight:226 RetIndex:1600

CompName:Hexadecane \$\$ n-Cetane \$\$ n-Hexadecane \$\$ Cetane

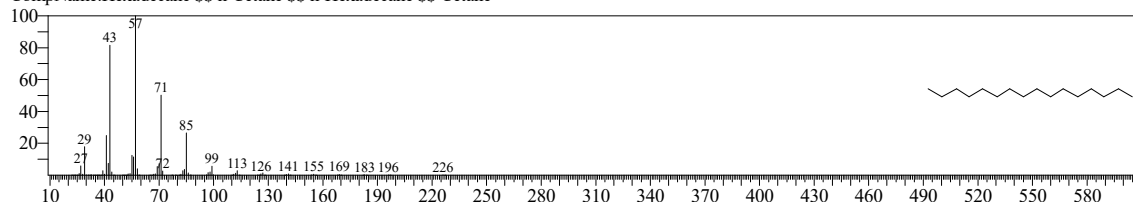

# TNAU

<< Target >>

Line#3 R.Time:9.695(Scan#:1040) MassPeaks:351

RawMode:Averaged 9.690-9.700(1039-1041) BasePeak:57.10(4877)

BG Mode:Calc. from Peak Group 1 - Event 1 Q3 Scan

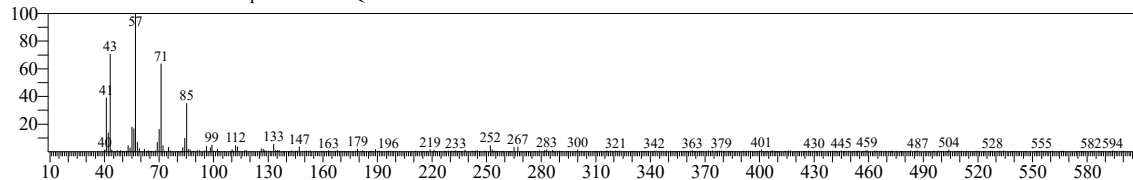

Hit#1 Entry:30057 Library:NIST20M1.lib

SI:90 Formula:C12H26 CAS:112-40-3 MolWeight:170 RetIndex:1200

CompName:Dodecane \$\$ n-Dodecane \$\$ Adakane 12 \$\$ Ba 51-090453 \$\$ CH3(CH2)10CH3 \$\$ Bihexyl \$\$ Dihexyl \$\$ Duodecane \$\$ NSC 8714

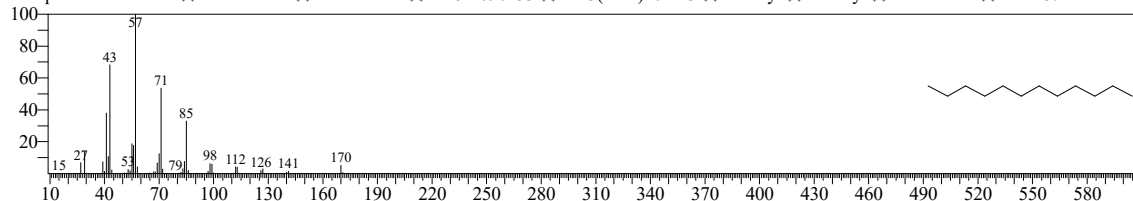

Hit#2 Entry:27736 Library:NIST20R.lib

SI:90 Formula:C16H34 CAS:544-76-3 MolWeight:226 RetIndex:1600

CompName:Hexadecane \$\$ n-Cetane \$\$ n-Hexadecane \$\$ Cetane

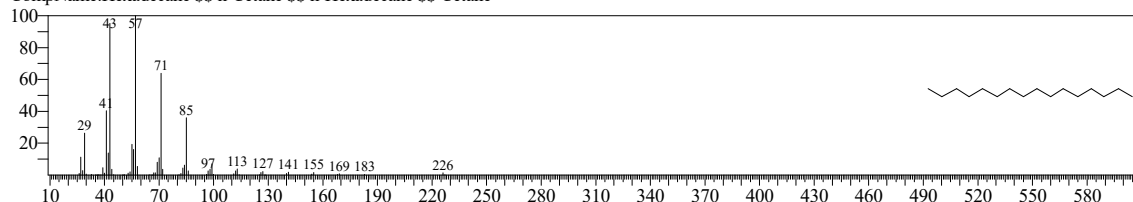

Hit#3 Entry:19410 Library:NIST20R.lib

SI:89 Formula:C13H28 CAS:629-50-5 MolWeight:184 RetIndex:1300

CompName:Tridecane \$\$ n-Tridecane \$\$ Tridecane, n-

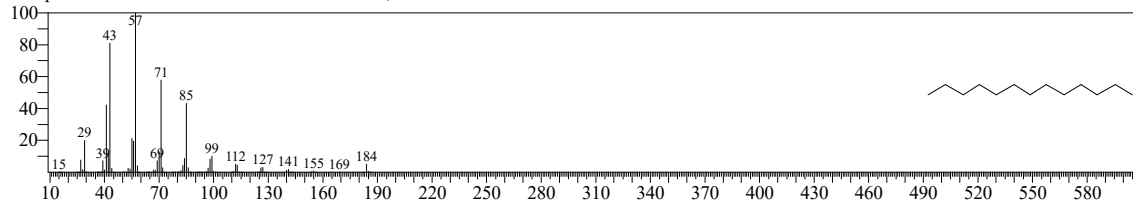

Hit#4 Entry:12897 Library:NIST20R.lib

SI:89 Formula:C11H24 CAS:1120-21-4 MolWeight:156 RetIndex:1100

CompName:Undecane \$\$ n-Undecane \$\$ Hendecane \$\$ n-C11H24 \$\$ UN 2330

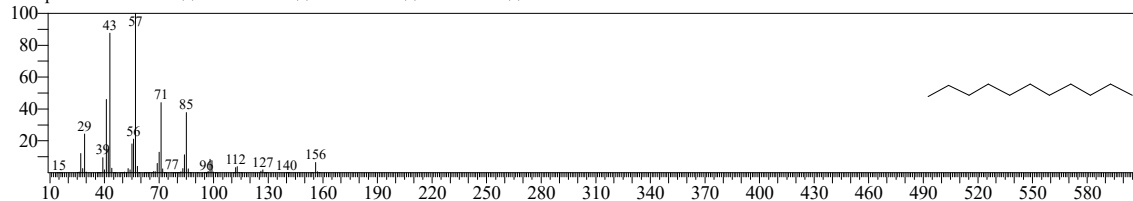

Hit#5 Entry:22498 Library:NIST20R.lib

SI:89 Formula:C14H30 CAS:629-59-4 MolWeight:198 RetIndex:1400

CompName:Tetradecane \$\$ n-Tetradecane

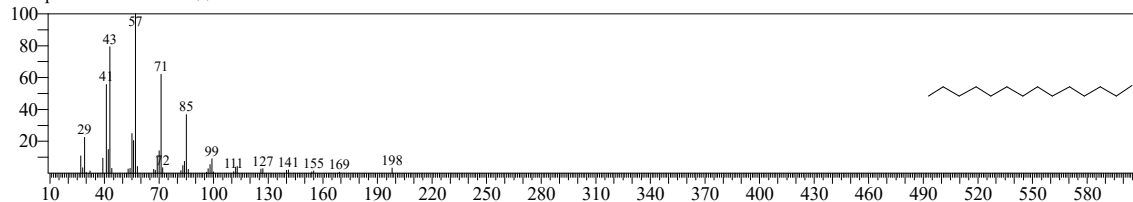

# TNAU

<< Target >>

Line#:4 R.Time:27.740(Scan#:4649) MassPeaks:283

RawMode:Averaged 27.735-27.745(4648-4650) BasePeak:207.05(1549)

BG Mode:Calc. from Peak Group 1 - Event 1 Q3 Scan

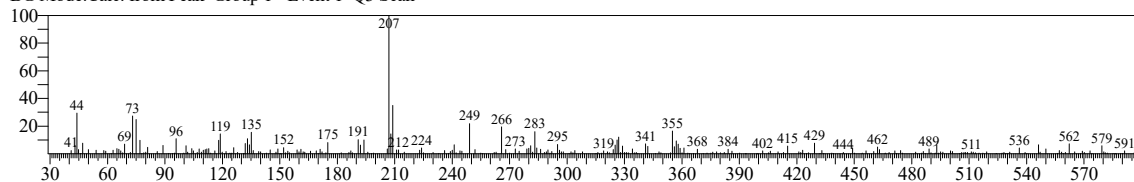

Hit#:1 Entry:343 Library:OA TMS DB5\_67min\_V3.lib

SI:40 Formula:C18H37NO3Si3 CAS:51-43-4 MolWeight:399 RetIndex:1868

CompName:Epinephrine-3TMS ; 4-[(1R)-1-hydroxy-2-(methylamino)ethyl]benzene-1,2-diol

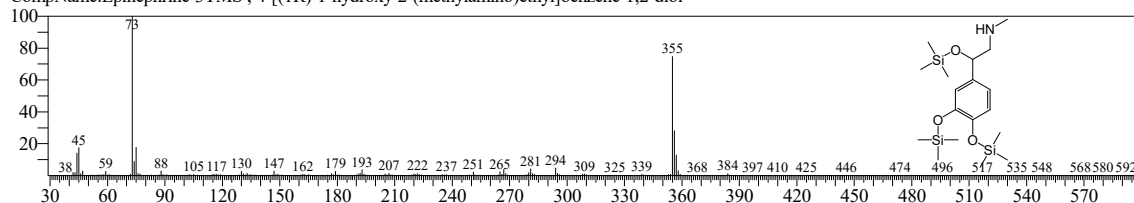

Hit#:2 Entry:402 Library:OA TMS DB5\_67min\_V3.lib

SI:40 Formula:C20H42O4Si4 CAS:775-01-9 MolWeight:458 RetIndex:1942

CompName:3,4-Dihydroxymandelic acid-4TMS ; 2-(3,4-dihydroxyphenyl)-2-hydroxyacetic acid

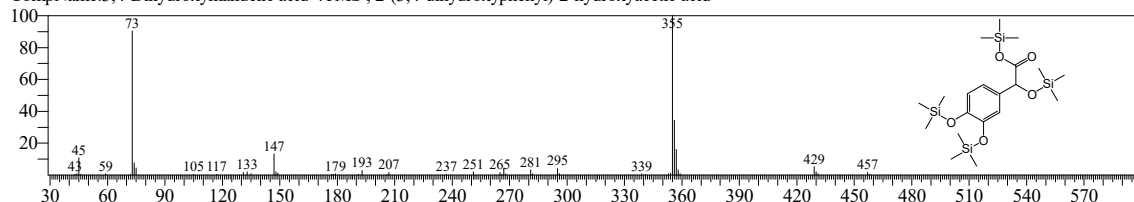

Hit#:3 Entry:328 Library:OA TMS DB5\_67min\_V3.lib

SI:39 Formula:C13H23NO2Si2 CAS:150-13-0 MolWeight:281 RetIndex:1845

CompName:4-Aminobenzoic acid-2TMS ; 4-aminobenzoic acid

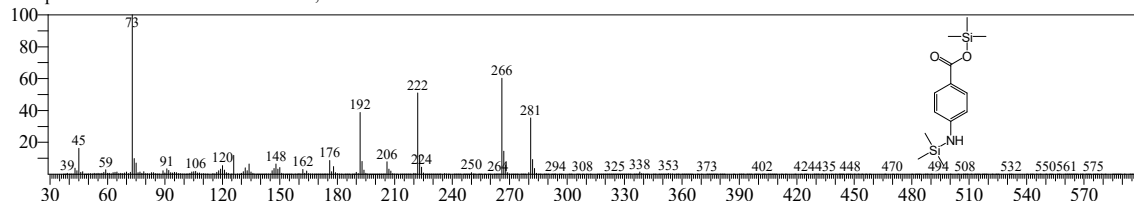

Hit#:4 Entry:290 Library:OA TMS DB5\_67min\_V3.lib

SI:38 Formula:C13H23NO3Si2 CAS:548-93-6 MolWeight:297 RetIndex:1773

CompName:3-Hydroxyanthranilic acid-2TMS ; 2-amino-3-hydroxybenzoic acid

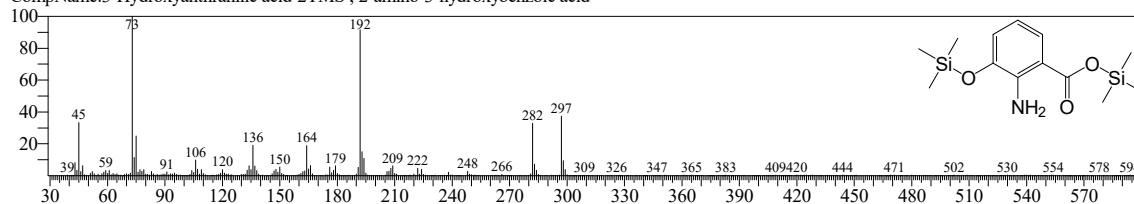

Hit#:5 Entry:294 Library:OA TMS DB5\_67min\_V3.lib

SI:36 Formula:C15H26O4Si2 CAS:306-08-1 MolWeight:326 RetIndex:1782

CompName:Homovanillic acid-2TMS ; 2-(4-hydroxy-3-methoxyphenyl)acetic acid

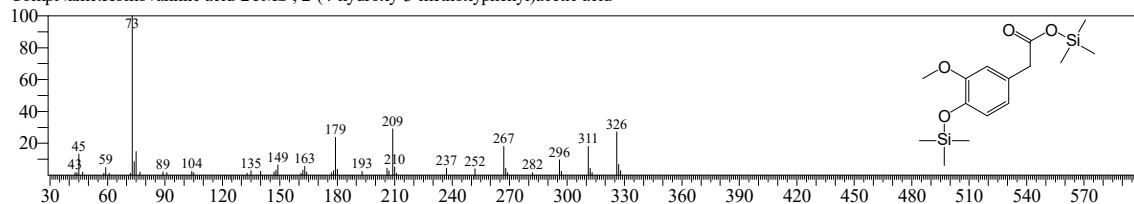

# TNAU

<< Target >>

Line#:5 R.Time:29.570(Scan#:5015) MassPeaks:302

RawMode:Averaged 29.565-29.575(5014-5016) BasePeak:44.00(797)

BG Mode:Calc. from Peak Group 1 - Event 1 Q3 Scan

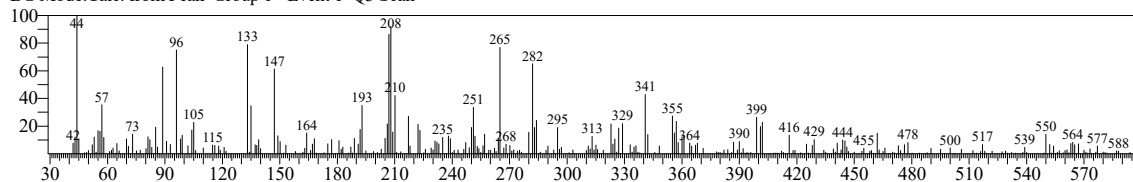

Hit#:1 Entry:402 Library:OA TMS\_DB5\_67min\_V3.lib

SI:33 Formula:C20H42O4Si4 CAS:775-01-9 MolWeight:458 RetIndex:1942

CompName:3,4-Dihydroxymandelic acid-4TMS ; 2-(3,4-dihydroxyphenyl)-2-hydroxyacetic acid

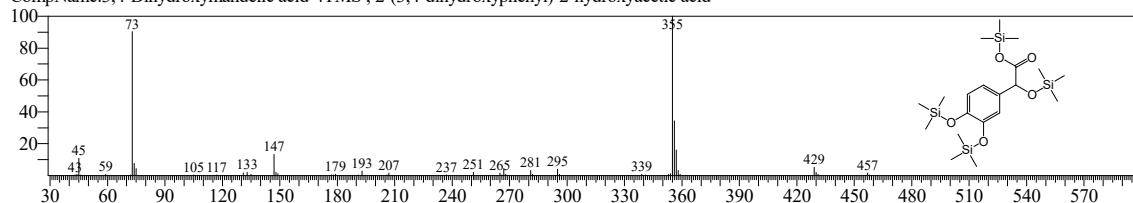

Hit#:2 Entry:384 Library:OA TMS\_DB5\_67min\_V3.lib

SI:32 Formula:C17H35NO3Si3 CAS:65-23-6 MolWeight:385 RetIndex:1919

CompName:Pyridoxine-3TMS ; 4,5-bis(hydroxymethyl)-2-methylpyridin-3-ol

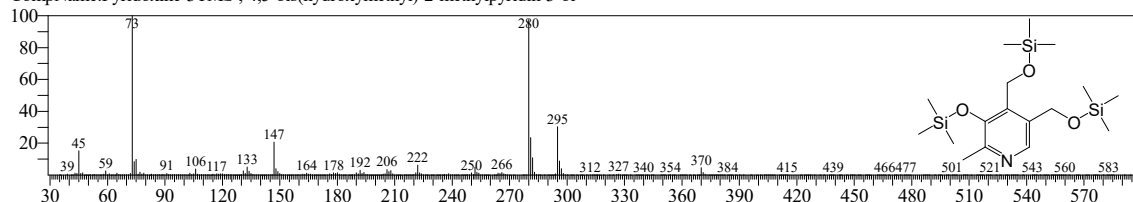

Hit#:3 Entry:343 Library:OA TMS\_DB5\_67min\_V3.lib

SI:31 Formula:C18H37NO3Si3 CAS:51-43-4 MolWeight:399 RetIndex:1868

CompName:Epinephrine-3TMS ; 4-[(1R)-1-hydroxy-2-(methylamino)ethyl]benzene-1,2-diol

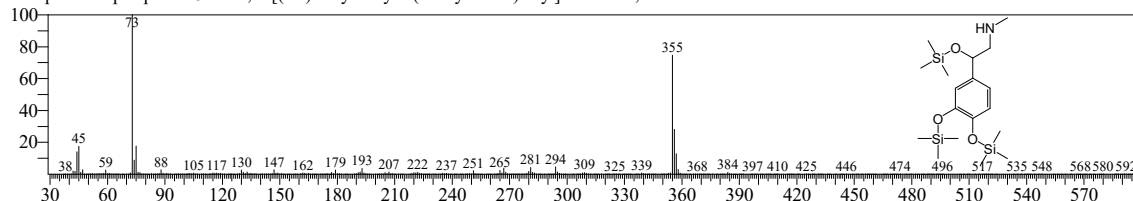

Hit#:4 Entry:310 Library:OA TMS\_DB5\_67min\_V3.lib

SI:31 Formula:C11H20N4OSi2 CAS:68-94-0 MolWeight:280 RetIndex:1822

CompName:Hypoxanthine-2TMS ; 3,7-dihydropurin-6-one

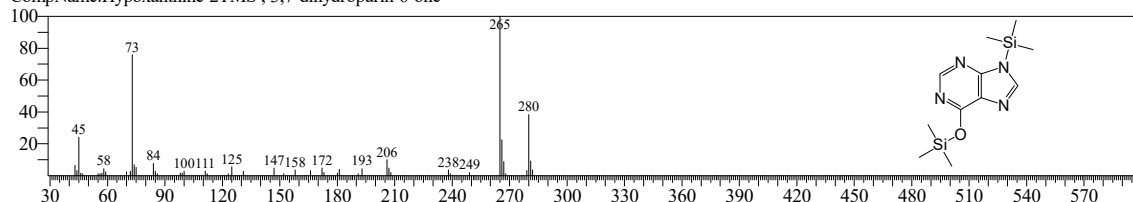

Hit#:5 Entry:418 Library:OA TMS\_DB5\_67min\_V3.lib

SI:30 Formula:C17H36N2O2Si3 CAS:85-87-0 MolWeight:384 RetIndex:1964

CompName:Pyridoxamine-3TMS ; 4-(aminomethyl)-5-(hydroxymethyl)-2-methylpyridin-3-ol

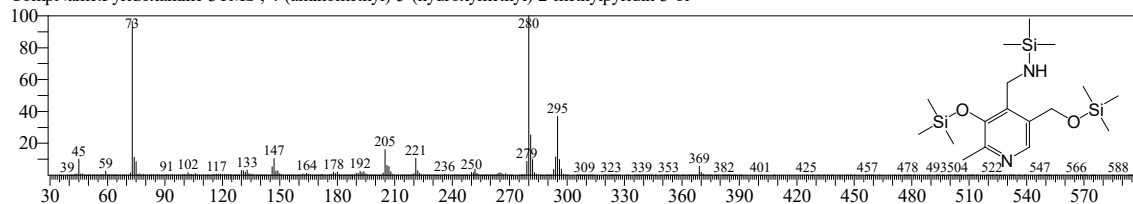

# TNAU

<< Target >>

Line#6 R.Time:29.665(Scan#:5034) MassPeaks:303

RawMode:Averaged 29.660-29.670(5033-5035) BasePeak:207.05(2641)

BG Mode:Calc. from Peak Group 1 - Event 1 Q3 Scan

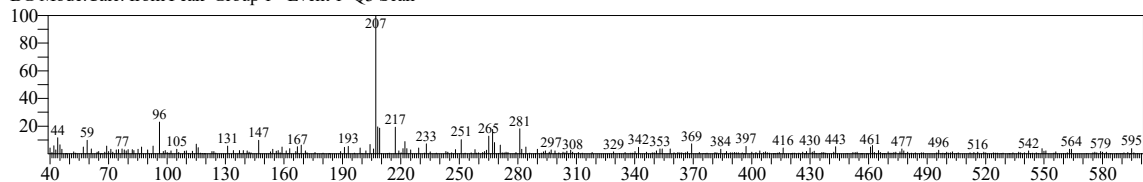

Hit#1 Entry:310 Library:OA\_TMS\_DB5\_67min\_V3.lib

SI:32 Formula:C11H20N4OSi2 CAS:68-94-0 MolWeight:280 RetIndex:1822

CompName:Hypoxanthine-2TMS ; 3,7-dihydropurin-6-one

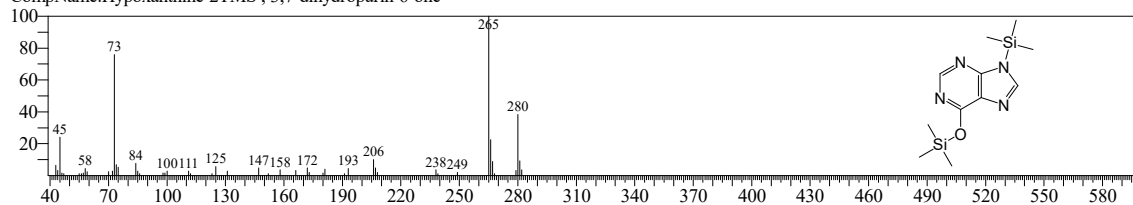

Hit#2 Entry:252 Library:OA\_TMS\_DB5\_67min\_V3.lib

SI:31 Formula:C18H44O5Si4 CAS:3615-37-0 MolWeight:452 RetIndex:1695

CompName:Fucose-4TMS(1) ; (2S,3R,4S,5R,6R)-6-methyloxane-2,3,4,5-tetrol

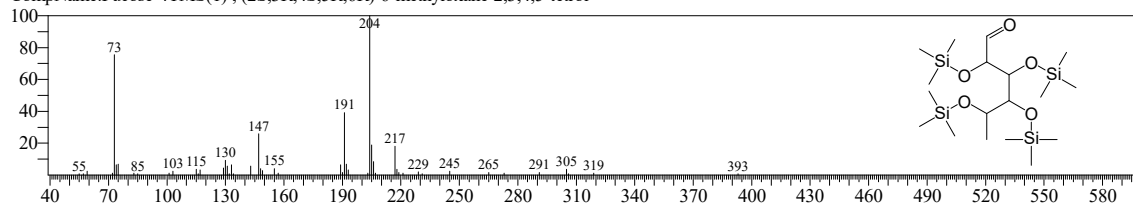

Hit#3 Entry:211 Library:OA\_TMS\_DB5\_67min\_V3.lib

SI:31 Formula:C13H22O3Si2 CAS:99-96-7 MolWeight:282 RetIndex:1636

CompName:4-Hydroxybenzoic acid-2TMS ; 4-hydroxybenzoic acid

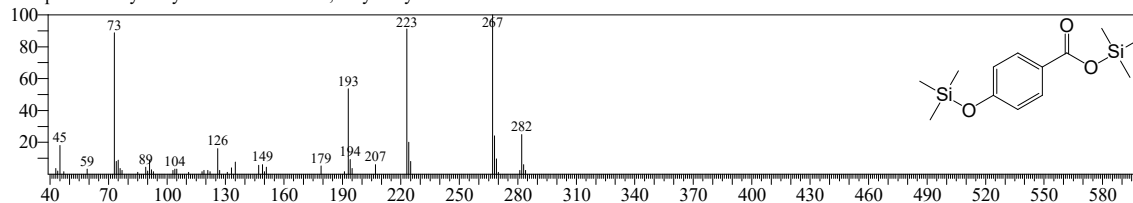

Hit#4 Entry:276 Library:OA\_TMS\_DB5\_67min\_V3.lib

SI:30 Formula:C18H44O5Si4 CAS:154-17-6 MolWeight:452 RetIndex:1745

CompName:2-Deoxy-glucose-4TMS(1) ; (2S,4S,5S,6S)-6-(hydroxymethyl)oxane-2,4,5-triol

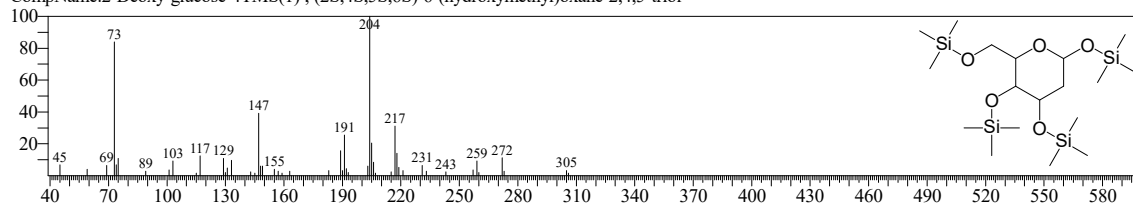

Hit#5 Entry:386 Library:OA\_TMS\_DB5\_67min\_V3.lib

SI:30 Formula:C21H52O6Si5 CAS:50-99-7 MolWeight:540 RetIndex:1922

CompName:Glucose-5TMS(1) ; (3R,4S,5S,6R)-6-(hydroxymethyl)oxane-2,3,4,5-tetrol

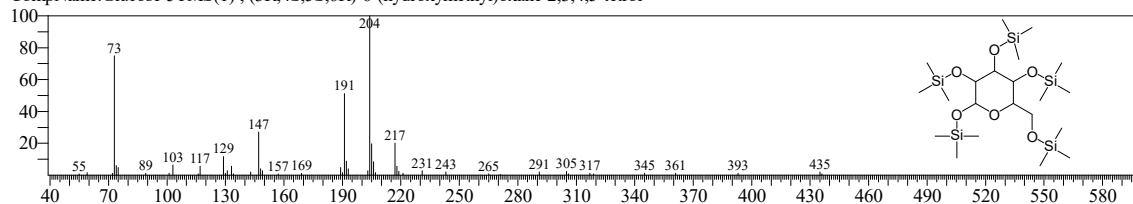

# TNAU

<< Target >>

Line#:7 R.Time:29.925(Scan#:5086) MassPeaks:337

RawMode:Averaged 29.920-29.930(5085-5087) BasePeak:281.05(1193)

BG Mode:Calc. from Peak Group 1 - Event 1 Q3 Scan

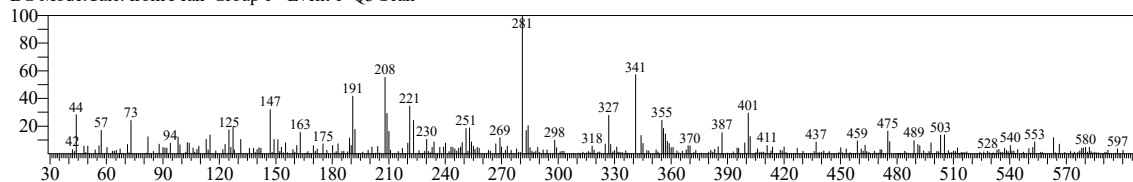

Hit#:1 Entry:402 Library:OA\_TMS\_DB5\_67min\_V3.lib

SI:33 Formula:C20H42O4Si4 CAS:775-01-9 MolWeight:458 RetIndex:1942

CompName:3,4-Dihydroxymandelic acid-4TMS ; 2-(3,4-dihydroxyphenyl)-2-hydroxyacetic acid

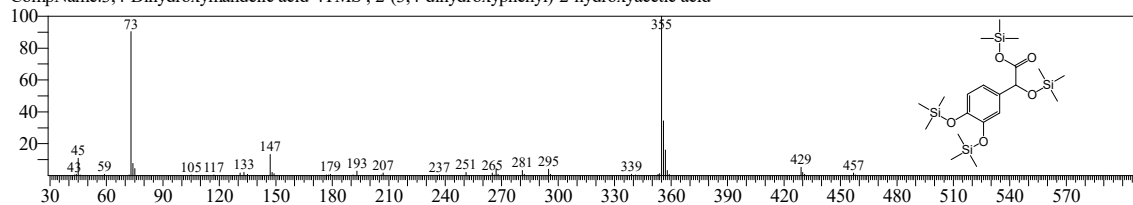

Hit#:2 Entry:343 Library:OA\_TMS\_DB5\_67min\_V3.lib

SI:31 Formula:C18H37NO3Si3 CAS:51-43-4 MolWeight:399 RetIndex:1868

CompName:Epinephrine-3TMS ; 4-[(1R)-1-hydroxy-2-(methylamino)ethyl]benzene-1,2-diol

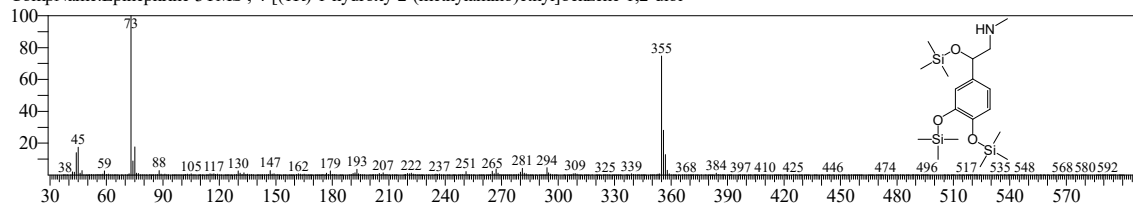

Hit#:3 Entry:507 Library:OA\_TMS\_DB5\_67min\_V3.lib

SI:30 Formula:C25H64NO9PSi6 CAS:3672-15-9 MolWeight:721 RetIndex:2377

CompName:Mannose 6-phosphate-meto-6TMS(2) ; [(2R,3S,4S,5S)-3,4,5,6-tetrahydroxyoxan-2-yl]methyl dihydrogen phosphate

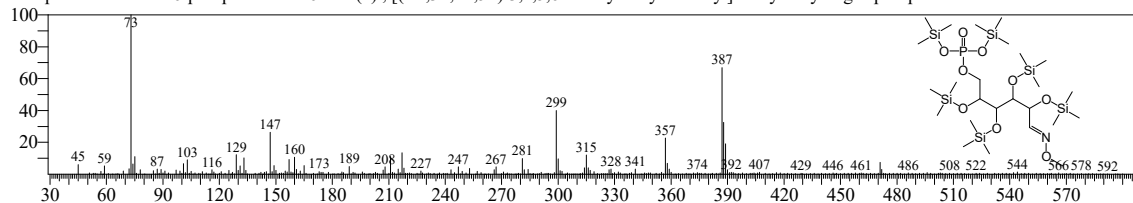

Hit#:4 Entry:184 Library:OA\_TMS\_DB5\_67min\_V3.lib

SI:28 Formula:C14H24O3Si2 CAS:614-75-5 MolWeight:296 RetIndex:1579

CompName:2-Hydroxyphenylacetic acid-2TMS ; 2-(2-hydroxyphenyl)acetic acid

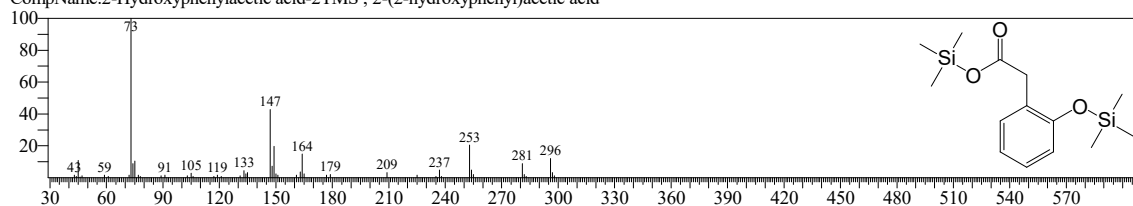

Hit#:5 Entry:528 Library:OA\_TMS\_DB5\_67min\_V3.lib

SI:26 Formula:C17H28Cl2N2O5Si2 CAS:56-75-7 MolWeight:466 RetIndex:2508

CompName:Chloramphenicol-2TMS ; 2,2-dichloro-N-[(1R,2R)-1,3-dihydroxy-1-(4-nitrophenyl)propan-2-yl]acetamide

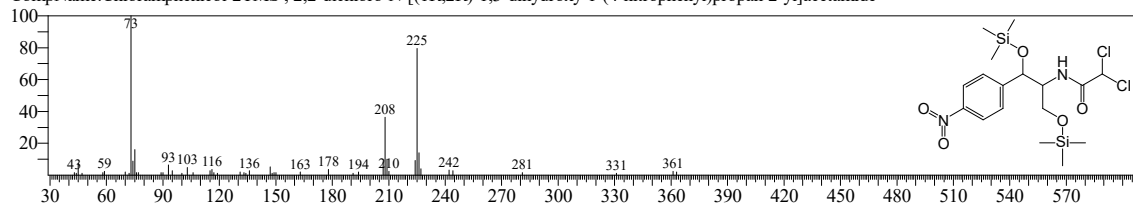



# TNAU

<< Target >>

Line#:8 R.Time:30.010(Scan#:5103) MassPeaks:274

RawMode:Averaged 30.005-30.015(5102-5104) BasePeak:207.05(960)

BG Mode:Calc. from Peak Group 1 - Event 1 Q3 Scan

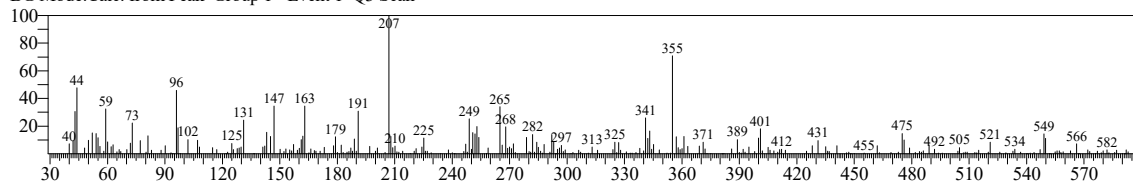

Hit#:1 Entry:402 Library:OA\_TMS\_DB5\_67min\_V3.lib

SI:38 Formula:C20H42O4Si4 CAS:775-01-9 MolWeight:458 RetIndex:1942

CompName:3,4-Dihydroxymandelic acid-4TMS ; 2-(3,4-dihydroxyphenyl)-2-hydroxyacetic acid



Hit#:2 Entry:343 Library:OA\_TMS\_DB5\_67min\_V3.lib

SI:37 Formula:C18H37NO3Si3 CAS:51-43-4 MolWeight:399 RetIndex:1868

CompName:Epinephrine-3TMS ; 4-[(1R)-1-hydroxy-2-(methylamino)ethyl]benzene-1,2-diol

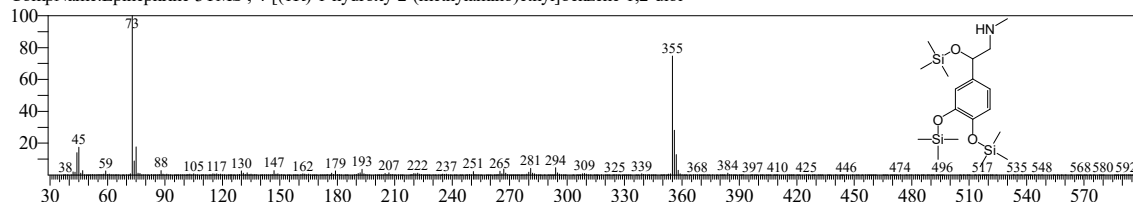

Hit#:3 Entry:382 Library:OA\_TMS\_DB5\_67min\_V3.lib

SI:32 Formula:C18H34O4Si3 CAS:6482-98-0 MolWeight:398 RetIndex:1918

CompName:4-Hydroxyphenyllactic acid-3TMS ; 2-hydroxy-3-(4-hydroxyphenyl)propanoate

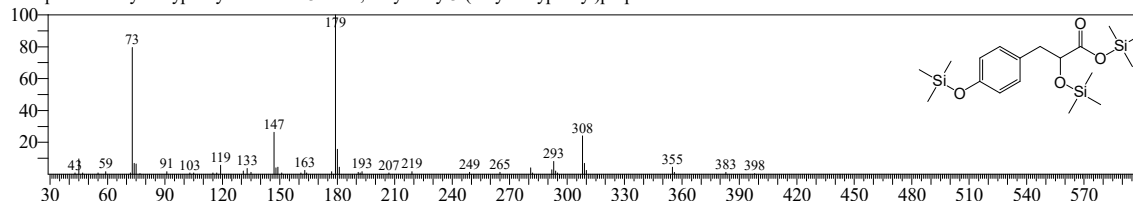

Hit#:4 Entry:10 Library:OA\_TMS\_DB5\_67min\_V3.lib

SI:32 Formula:C10H24O3Si2 CAS:594-61-6 MolWeight:248 RetIndex:1067

CompName:2-Hydroxyisobutyric acid-2TMS ; 2-hydroxy-2-methylpropanoic acid

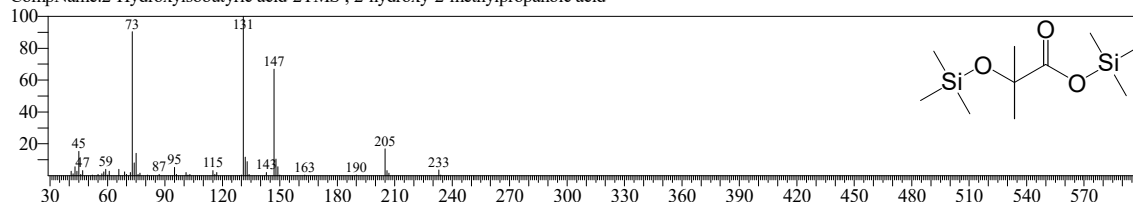

Hit#:5 Entry:224 Library:OA\_TMS\_DB5\_67min\_V3.lib

SI:30 Formula:C16H38O6Si4 CAS:87-69-4 MolWeight:438 RetIndex:1654

CompName:Tartaric acid-4TMS ; (2R,3R)-2,3-dihydroxybutanedioic acid

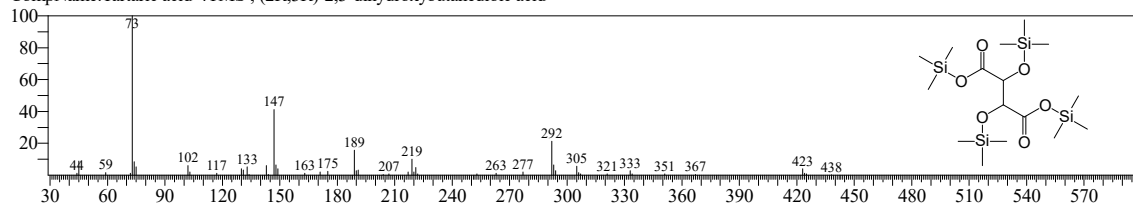

# TNAU

<< Target >>

Line#9 R.Time:30.040(Scan#:5109) MassPeaks:264

RawMode:Averaged 30.035-30.045(5108-5110) BasePeak:73.05(718)

BG Mode:Calc. from Peak Group 1 - Event 1 Q3 Scan

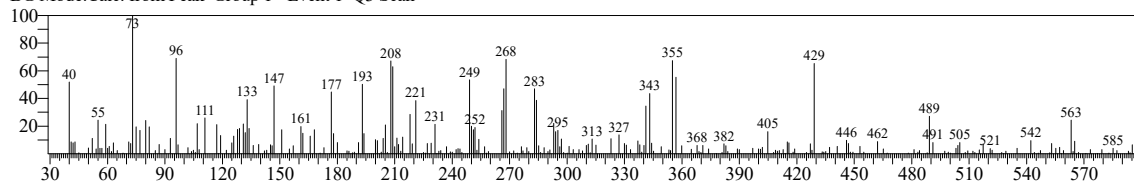

Hit#1 Entry:402 Library:OA\_TMS\_DB5\_67min\_V3.lib

SI:36 Formula:C20H42O4Si4 CAS:775-01-9 MolWeight:458 RetIndex:1942

CompName:3,4-Dihydroxymandelic acid-4TMS ; 2-(3,4-dihydroxyphenyl)-2-hydroxyacetic acid

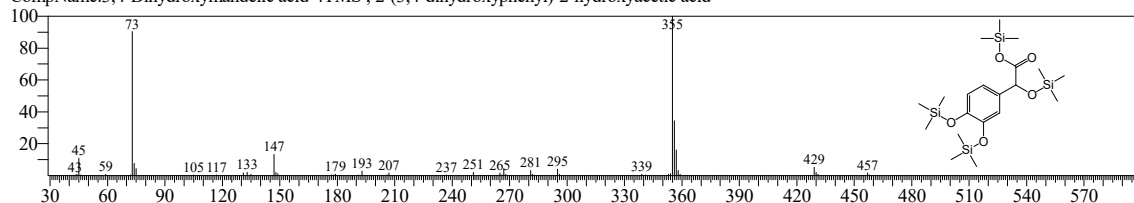

Hit#2 Entry:194 Library:OA\_TMS\_DB5\_67min\_V3.lib

SI:34 Formula:C15H26O3Si2 CAS:828-01-3 MolWeight:310 RetIndex:1599

CompName:3-Phenyllactic acid-2TMS ; 2-hydroxy-3-phenylpropanoic acid

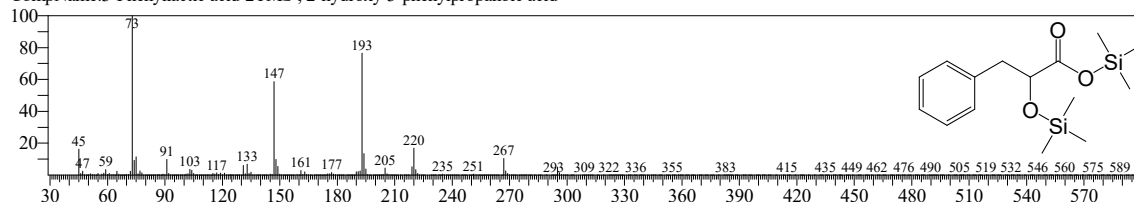

Hit#3 Entry:343 Library:OA\_TMS\_DB5\_67min\_V3.lib

SI:34 Formula:C18H37NO3Si3 CAS:51-43-4 MolWeight:399 RetIndex:1868

CompName:Epinephrine-3TMS ; 4-[(1R)-1-hydroxy-2-(methylamino)ethyl]benzene-1,2-diol

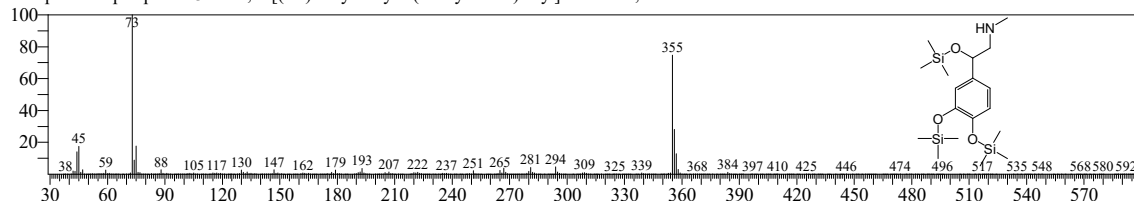

Hit#4 Entry:203 Library:OA\_TMS\_DB5\_67min\_V3.lib

SI:32 Formula:C13H23NO2Si2 CAS:118-92-3 MolWeight:281 RetIndex:1623

CompName:Anthranilic acid-2TMS ; 2-aminobenzoic acid

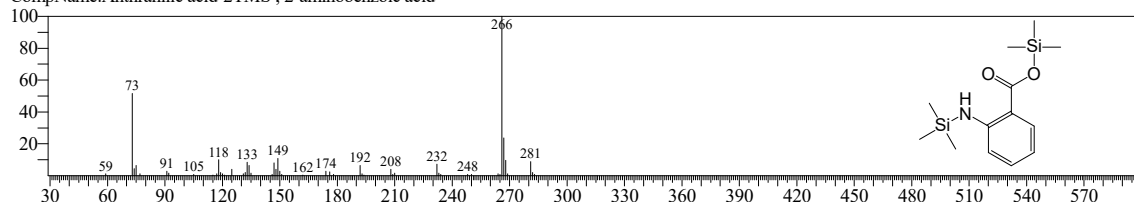

Hit#5 Entry:526 Library:OA\_TMS\_DB5\_67min\_V3.lib

SI:31 Formula:C23H52N2O6Si4 CAS:997-68-2 MolWeight:564 RetIndex:2497

CompName:Saccharopine-4TMS ; (2S)-2-[[[(5S)-5-amino-5-carboxypentyl]amino]pentanedioic acid

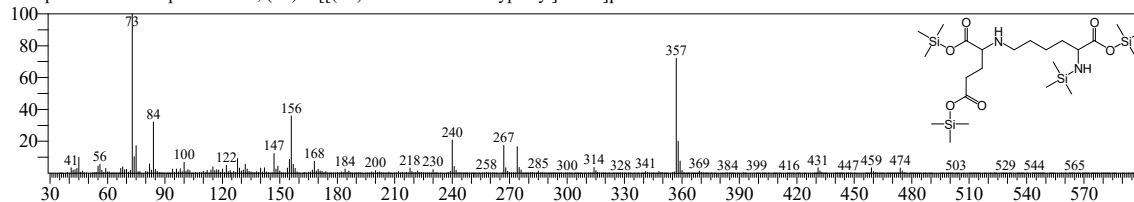

# TNAU

<< Target >>

Line#:10 R.Time:30.165(Scan#:5134) MassPeaks:308

RawMode:Averaged 30.160-30.170(5133-5135) BasePeak:281.00(1139)

BG Mode:Calc. from Peak Group 1 - Event 1 Q3 Scan

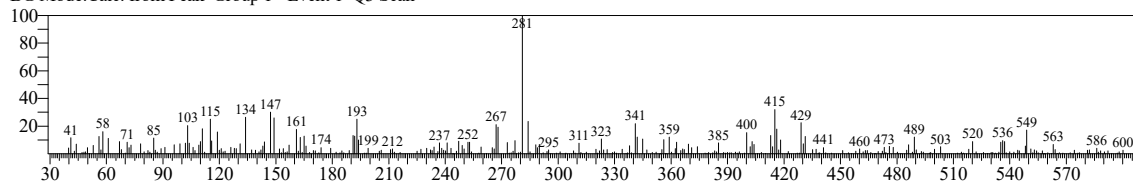

Hit#:1 Entry:150 Library:OA\_TMS\_DB5\_67min\_V3.lib

SI:28 Formula:C15H26O3Si2 CAS:515-30-0 MolWeight:310 RetIndex:1517

CompName:2-Phenyllactic acid-2TMS ; 2-hydroxy-3-phenylpropanoic acid

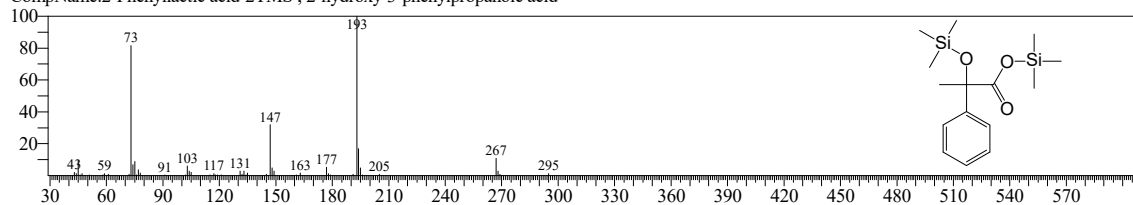

Hit#:2 Entry:341 Library:OA\_TMS\_DB5\_67min\_V3.lib

SI:28 Formula:C18H34O4Si3 CAS:3247-75-4 MolWeight:398 RetIndex:1864

CompName:3-(3-Hydroxyphenyl)-3-hydroxypropionic acid-3TMS ; 3-hydroxy-3-(3-hydroxyphenyl)propanoic acid

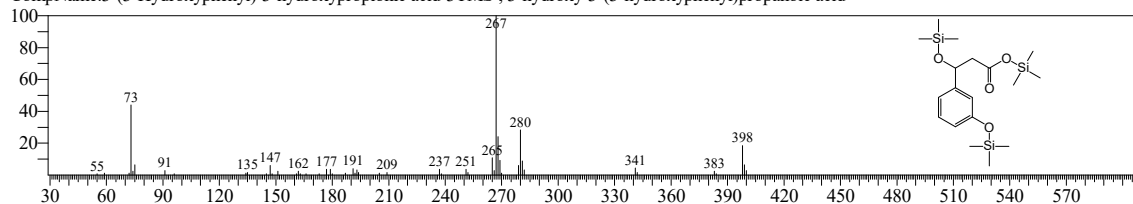

Hit#:3 Entry:9 Library:OA\_TMS\_DB5\_67min\_V3.lib

SI:28 Formula: CAS:0-00-0 MolWeight:237 RetIndex:1062

CompName:Lactic acid-13C3-2TMS ;

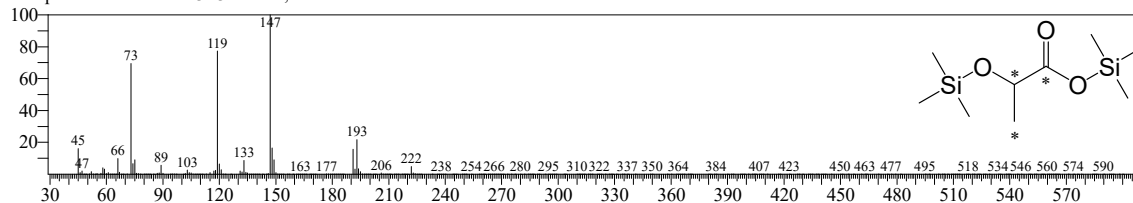

Hit#:4 Entry:211 Library:OA\_TMS\_DB5\_67min\_V3.lib

SI:26 Formula:C13H22O3Si2 CAS:99-96-7 MolWeight:282 RetIndex:1636

CompName:4-Hydroxybenzoic acid-2TMS ; 4-hydroxybenzoic acid

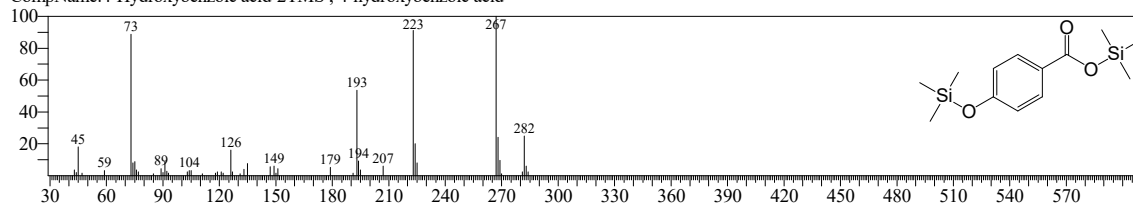

Hit#:5 Entry:179 Library:OA\_TMS\_DB5\_67min\_V3.lib

SI:25 Formula:C13H22O3Si2 CAS:99-06-9 MolWeight:282 RetIndex:1572

CompName:3-Hydroxybenzoic acid-2TMS ; 3-hydroxybenzoic acid

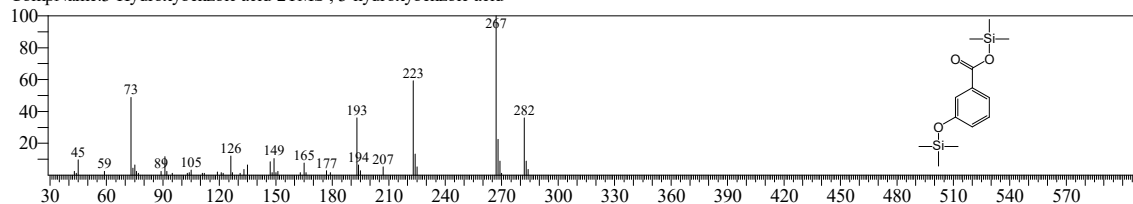

# TNAU

<< Target >>

Line#:11 R.Time:30.270(Scan#:5155) MassPeaks:280

RawMode:Averaged 30.265-30.275(5154-5156) BasePeak:44.00(651)

BG Mode:Calc. from Peak Group 1 - Event 1 Q3 Scan

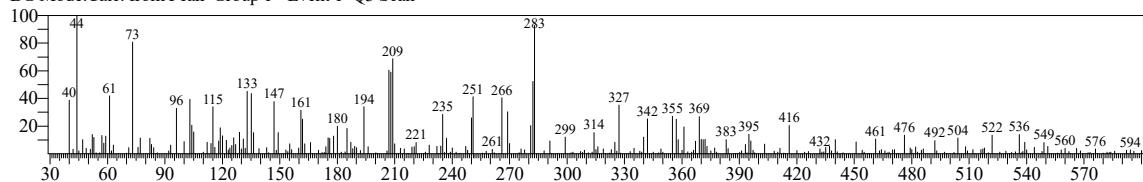

Hit#:1 Entry:203 Library:OA\_TMS\_DB5\_67min\_V3.lib

SI:34 Formula:C<sub>13</sub>H<sub>23</sub>NO<sub>2</sub>Si<sub>2</sub> CAS:118-92-3 MolWeight:281 RetIndex:1623

CompName:Anthranilic acid-2TMS ; 2-aminobenzoic acid

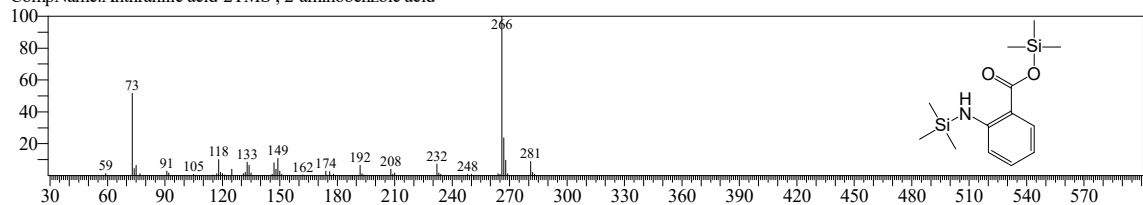

Hit#:2 Entry:184 Library:OA\_TMS\_DB5\_67min\_V3.lib

SI:34 Formula:C<sub>14</sub>H<sub>24</sub>O<sub>3</sub>Si<sub>2</sub> CAS:614-75-5 MolWeight:296 RetIndex:1579

CompName:2-Hydroxyphenylacetic acid-2TMS ; 2-(2-hydroxyphenyl)acetic acid

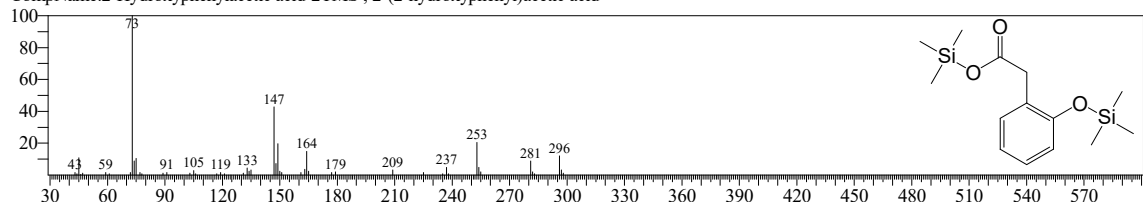

Hit#:3 Entry:328 Library:OA\_TMS\_DB5\_67min\_V3.lib

SI:33 Formula:C<sub>13</sub>H<sub>23</sub>NO<sub>2</sub>Si<sub>2</sub> CAS:150-13-0 MolWeight:281 RetIndex:1845

CompName:4-Aminobenzoic acid-2TMS ; 4-aminobenzoic acid

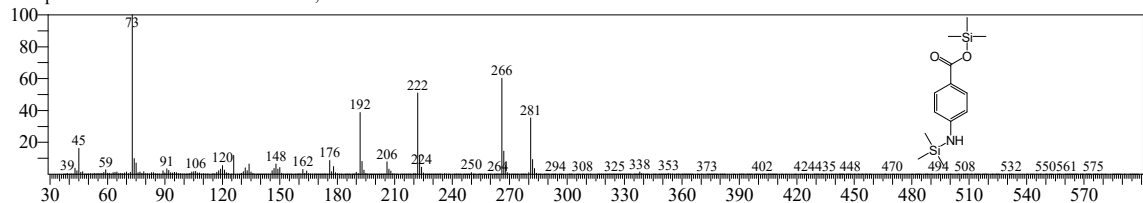

Hit#:4 Entry:195 Library:OA\_TMS\_DB5\_67min\_V3.lib

SI:33 Formula:C<sub>15</sub>H<sub>26</sub>O<sub>3</sub>Si<sub>2</sub> CAS:529-64-6 MolWeight:310 RetIndex:1600

CompName:Tropic acid-2TMS ; 3-hydroxy-2-phenylpropanoic acid

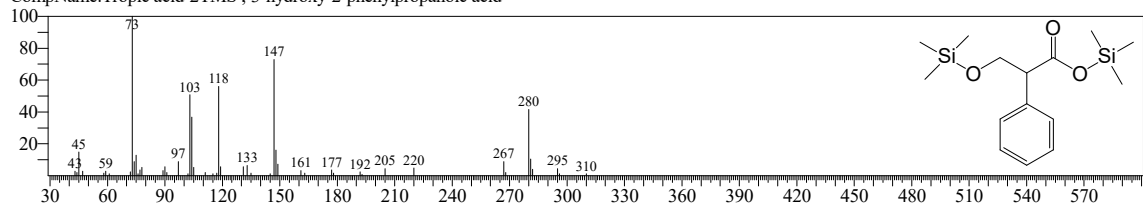

Hit#:5 Entry:290 Library:OA\_TMS\_DB5\_67min\_V3.lib

SI:33 Formula:C<sub>13</sub>H<sub>23</sub>NO<sub>3</sub>Si<sub>2</sub> CAS:548-93-6 MolWeight:297 RetIndex:1773

CompName:3-Hydroxyanthranilic acid-2TMS ; 2-amino-3-hydroxybenzoic acid

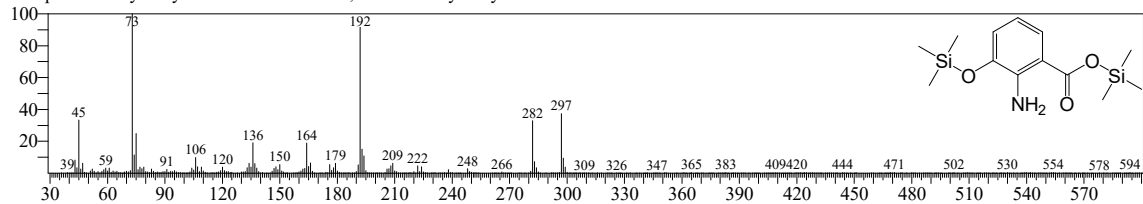

# TNAU

<< Target >>

Line#:12 R.Time:30.305(Scan#:5162) MassPeaks:311

RawMode:Averaged 30.300-30.310(5161-5163) BasePeak:207.05(1484)

BG Mode:Calc. from Peak Group 1 - Event 1 Q3 Scan

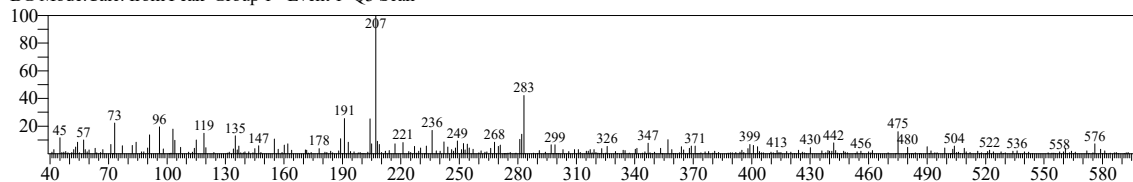

Hit#:1 Entry:261 Library:OA\_TMS\_DB5\_67min\_V3.lib

SI:41 Formula:C18H44O5Si4 CAS:10485-94-6 MolWeight:452 RetIndex:1719

CompName:Rhamnose-4TMS(2); (2R,3R,4S,5S)-2,3,4,5-tetrahydroxyhexanal

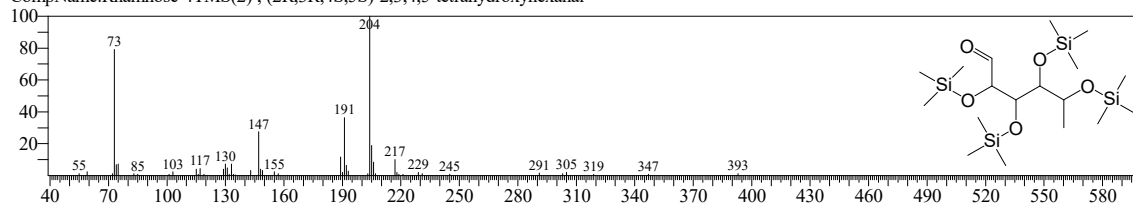

Hit#:2 Entry:271 Library:OA\_TMS\_DB5\_67min\_V3.lib

SI:40 Formula:C18H44O5Si4 CAS:3615-37-0 MolWeight:452 RetIndex:1738

CompName:Fucose-4TMS(2); (2S,3R,4S,5R,6R)-6-methyloxane-2,3,4,5-tetrol

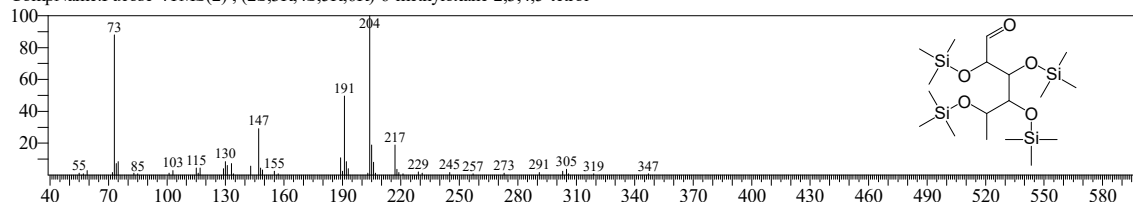

Hit#:3 Entry:205 Library:OA\_TMS\_DB5\_67min\_V3.lib

SI:39 Formula:C17H42O5Si4 CAS:1114-34-7 MolWeight:438 RetIndex:1624

CompName:Lyxose-4TMS(1); (2S,3S,4R)-2,3,4,5-tetrahydroxypentanal

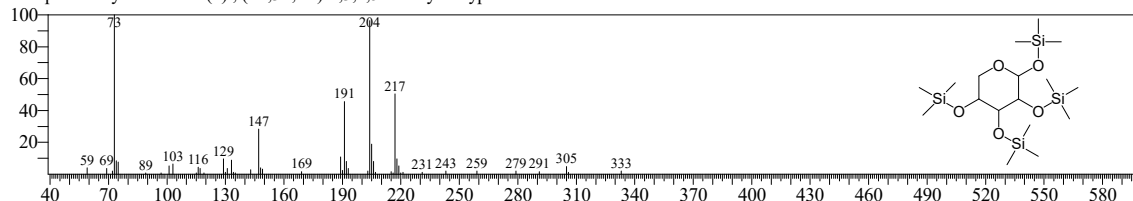

Hit#:4 Entry:437 Library:OA\_TMS\_DB5\_67min\_V3.lib

SI:39 Formula:C21H52O6Si5 CAS:50-99-7 MolWeight:540 RetIndex:2002

CompName:Glucose-5TMS(2); (3R,4S,5S,6R)-6-(hydroxymethyl)oxane-2,3,4,5-tetrol

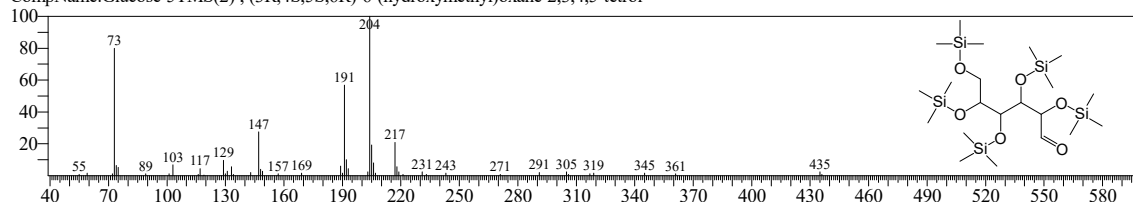

Hit#:5 Entry:295 Library:OA\_TMS\_DB5\_67min\_V3.lib

SI:39 Formula:C17H42O5Si4 CAS:58-86-6 MolWeight:438 RetIndex:1784

CompName:Xylose-4TMS(2); (2R,3S,4R)-2,3,4,5-tetrahydroxypentanal

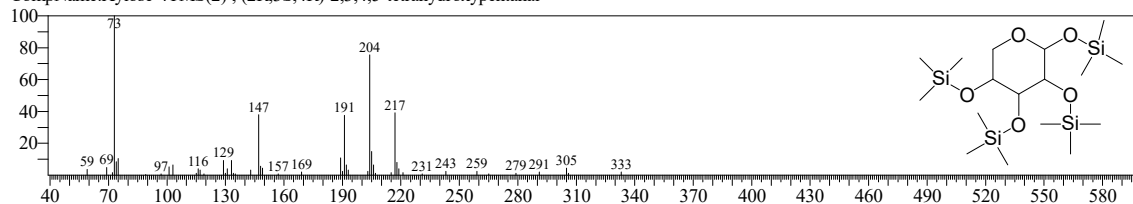

# TNAU

<< Target >>

Line#:13 R.Time:31.910(Scan#:5483) MassPeaks:317

RawMode:Averaged 31.905-31.915(5482-5484) BasePeak:207.05(1273)

BG Mode:Calc. from Peak Group 1 - Event 1 Q3 Scan

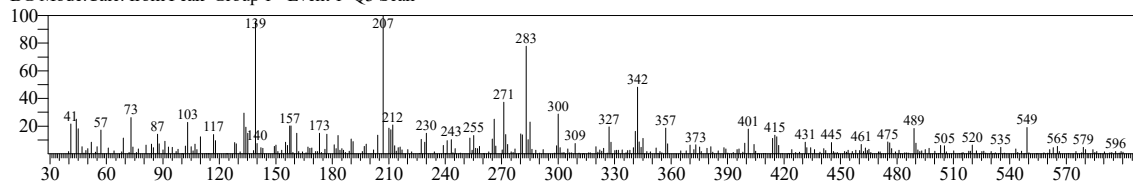

Hit#:1 Entry:269 Library:OA\_TMS\_DB5\_67min\_V3.lib

SI:29 Formula:C13H34NO6PSi3 CAS:142-10-9 MolWeight:415 RetIndex:1734

CompName:Glyceraldehyde 3-phosphate-meto-3TMS(2) ; (2-hydroxy-3-oxopropyl) dihydrogen phosphate

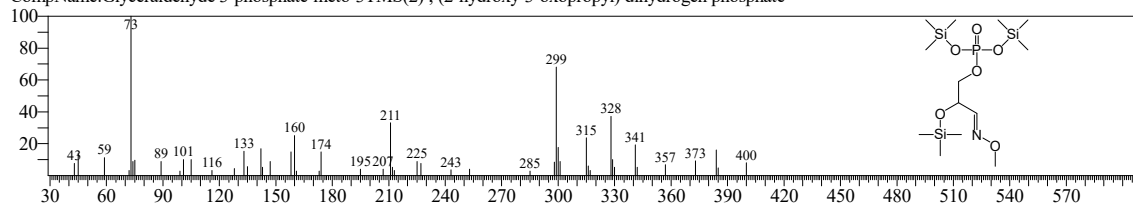

Hit#:2 Entry:384 Library:OA\_TMS\_DB5\_67min\_V3.lib

SI:27 Formula:C17H35NO3Si3 CAS:65-23-6 MolWeight:385 RetIndex:1919

CompName:Pyridoxine-3TMS ; 4,5-bis(hydroxymethyl)-2-methylpyridin-3-ol

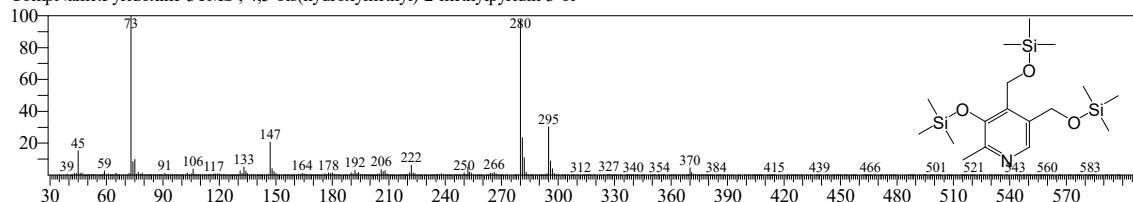

Hit#:3 Entry:394 Library:OA\_TMS\_DB5\_67min\_V3.lib

SI:27 Formula:C17H44NO7PSi4 CAS:585-18-2 MolWeight:517 RetIndex:1935

CompName:Erythrose 4-phosphate-meto-4TMS(2) ; [(2R,3R)-2,3-dihydroxy-4-oxobutyl] dihydrogen phosphate

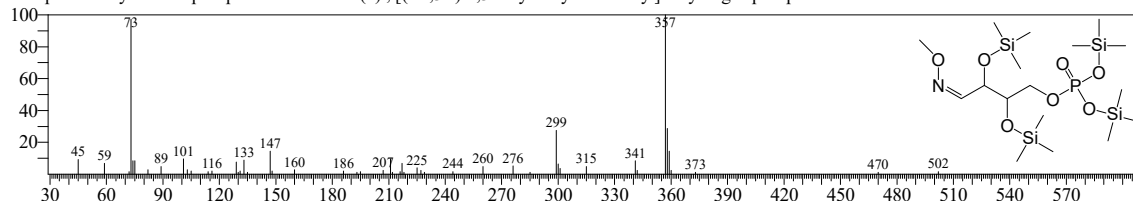

Hit#:4 Entry:486 Library:OA\_TMS\_DB5\_67min\_V3.lib

SI:27 Formula:C18H48O10P2Si5 CAS:138-81-8 MolWeight:626 RetIndex:2225

CompName:2,3-Bisphosphoglyceric acid-5TMS ; 2,3-diphosphonoxypropanoic acid

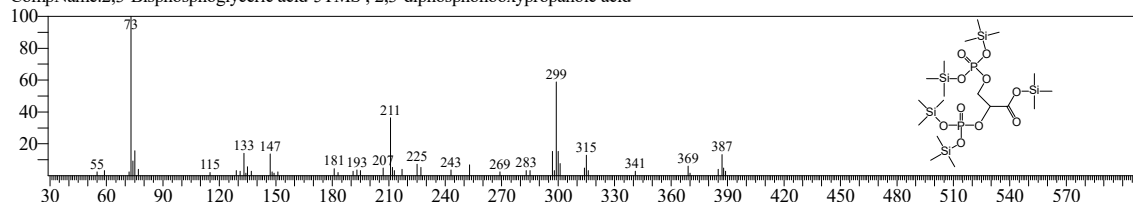

Hit#:5 Entry:468 Library:OA\_TMS\_DB5\_67min\_V3.lib

SI:26 Formula:C21H54NO8PSi5 CAS:4151-19-3 MolWeight:619 RetIndex:2137

CompName:Ribulose 5-phosphate-meto-5TMS(1) ; [(2R,3R)-2,3,5-trihydroxy-4-oxopentyl] dihydrogen phosphate

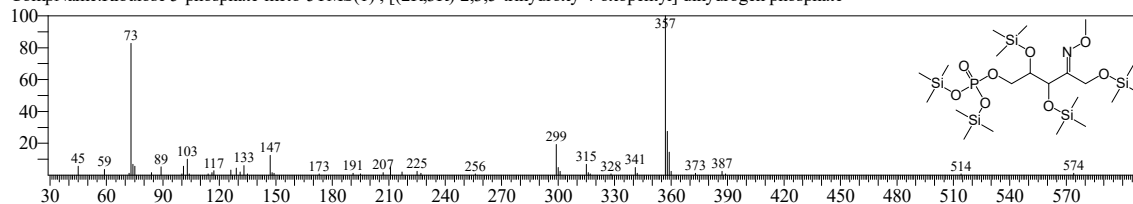

# TNAU

<< Target >>

Line#:14 R.Time:32.380(Scan#:5577) MassPeaks:314

RawMode:Averaged 32.375-32.385(5576-5578) BasePeak:207.05(1149)

BG Mode:Calc. from Peak Group 1 - Event 1 Q3 Scan

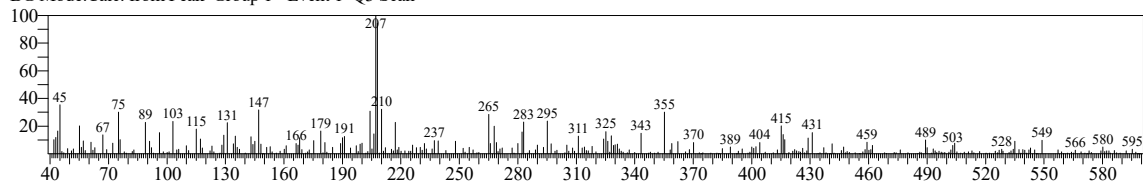

Hit#:1 Entry:276 Library:OA\_TMS\_DB5\_67min\_V3.lib

SI:33 Formula:C18H44O5Si4 CAS:154-17-6 MolWeight:452 RetIndex:1745

CompName:2-Deoxy-glucose-4TMS(1) ; (2S,4S,5S,6S)-6-(hydroxymethyl)oxane-2,4,5-triol

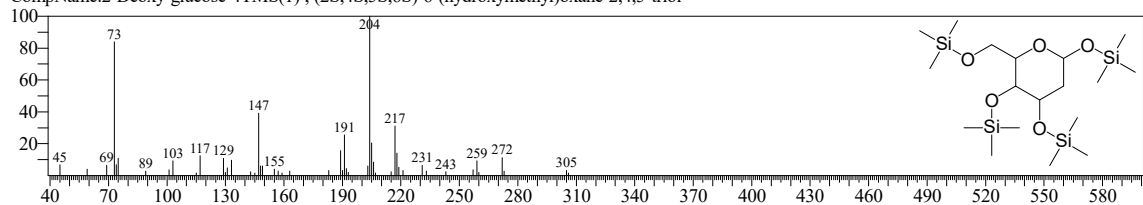

Hit#:2 Entry:311 Library:OA\_TMS\_DB5\_67min\_V3.lib

SI:33 Formula:C21H52O6Si5 CAS:59-23-4 MolWeight:540 RetIndex:1824

CompName:Galactose-5TMS(1) ; (3R,4S,5R,6R)-6-(hydroxymethyl)oxane-2,3,4,5-tetrol

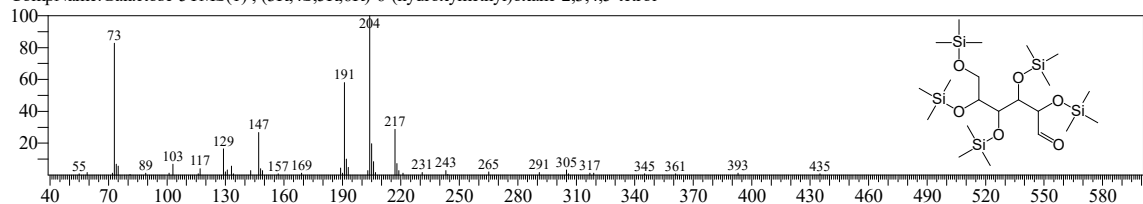

Hit#:3 Entry:386 Library:OA\_TMS\_DB5\_67min\_V3.lib

SI:33 Formula:C21H52O6Si5 CAS:50-99-7 MolWeight:540 RetIndex:1922

CompName:Glucose-5TMS(1) ; (3R,4S,5S,6R)-6-(hydroxymethyl)oxane-2,3,4,5-tetrol

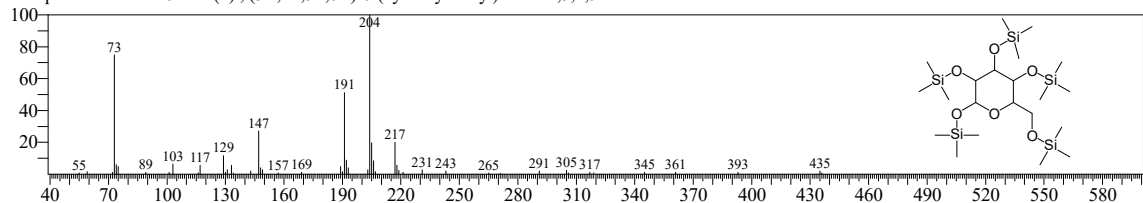

Hit#:4 Entry:252 Library:OA\_TMS\_DB5\_67min\_V3.lib

SI:32 Formula:C18H44O5Si4 CAS:3615-37-0 MolWeight:452 RetIndex:1695

CompName:Fucose-4TMS(1) ; (2S,3R,4S,5R,6R)-6-methyloxane-2,3,4,5-tetrol

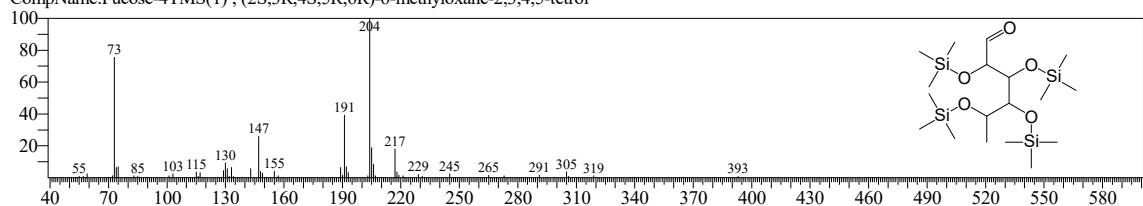

Hit#:5 Entry:349 Library:OA\_TMS\_DB5\_67min\_V3.lib

SI:32 Formula:C21H52O6Si5 CAS:2595-97-3 MolWeight:540 RetIndex:1874

CompName:Allose-5TMS ; (2R,3R,4R,5R)-2,3,4,5,6-pentahydroxyhexanal

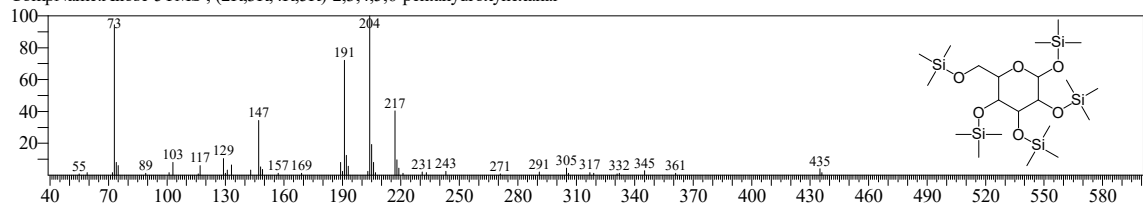

# TNAU

<< Target >>

Line#:15 R.Time:32.460(Scan#:5593) MassPeaks:249

RawMode:Averaged 32.455-32.465(5592-5594) BasePeak:207.00(3054)

BG Mode:Calc. from Peak Group 1 - Event 1 Q3 Scan

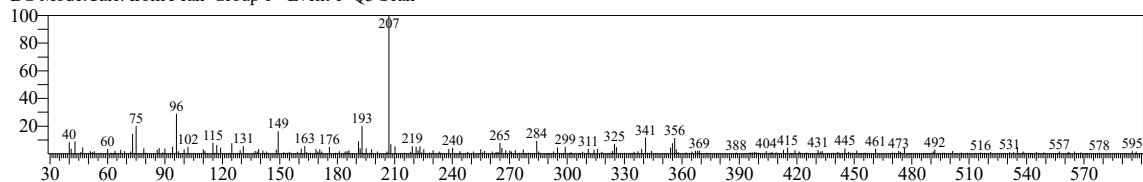

Hit#:1 Entry:343 Library:OA\_TMS\_DB5\_67min\_V3.lib

SI:41 Formula:C18H37NO3Si3 CAS:51-43-4 MolWeight:399 RetIndex:1868

CompName:Epinephrine-3TMS ; 4-[(1R)-1-hydroxy-2-(methylamino)ethyl]benzene-1,2-diol

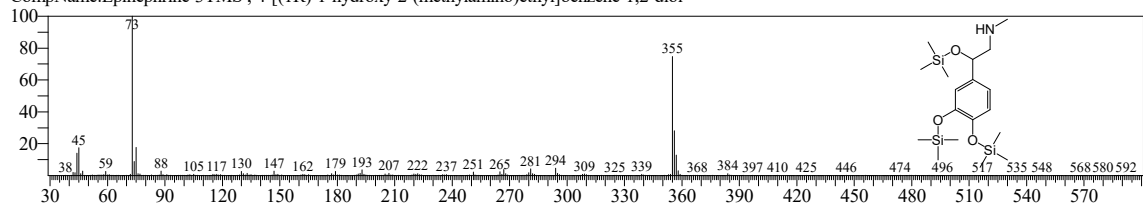

Hit#:2 Entry:402 Library:OA\_TMS\_DB5\_67min\_V3.lib

SI:40 Formula:C20H42O4Si4 CAS:775-01-9 MolWeight:458 RetIndex:1942

CompName:3,4-Dihydroxymandelic acid-4TMS ; 2-(3,4-dihydroxyphenyl)-2-hydroxyacetic acid

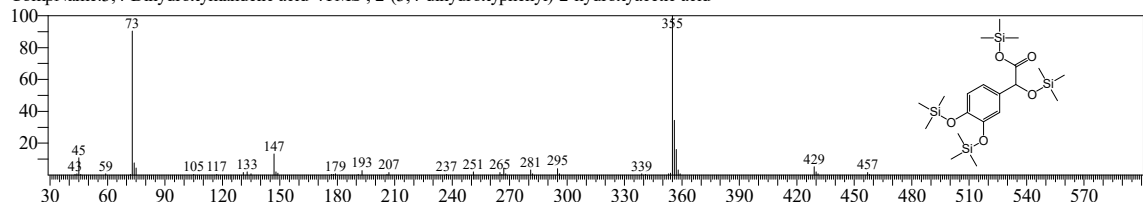

Hit#:3 Entry:3 Library:OA\_TMS\_DB5\_67min\_V3.lib

SI:35 Formula:C9H27BO3Si3 CAS:10043-35-3 MolWeight:278 RetIndex:992

CompName:Boric acid-3TMS ; boric acid

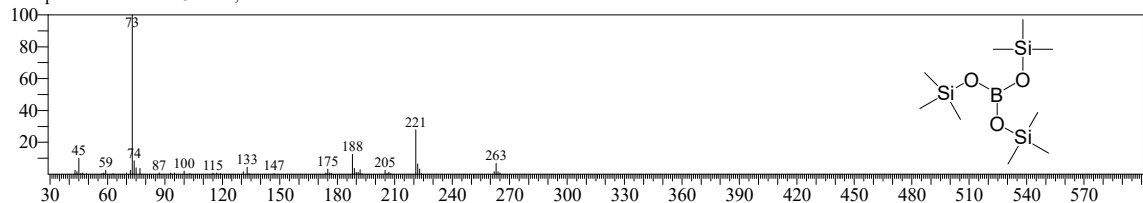

Hit#:4 Entry:354 Library:OA\_TMS\_DB5\_67min\_V3.lib

SI:35 Formula:C16H31NO3Si3 CAS:548-93-6 MolWeight:369 RetIndex:1886

CompName:3-Hydroxyanthranilic acid-3TMS ; 2-amino-3-hydroxybenzoic acid

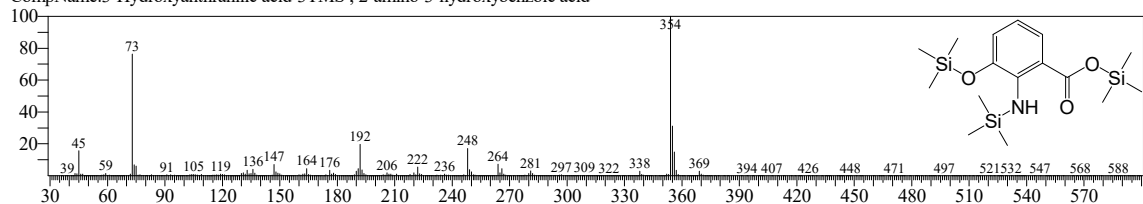

Hit#:5 Entry:315 Library:OA\_TMS\_DB5\_67min\_V3.lib

SI:35 Formula:C16H30O4Si3 CAS:99-50-3 MolWeight:370 RetIndex:1833

CompName:Protocatechuic acid-3TMS ; 3,4-dihydroxybenzoic acid

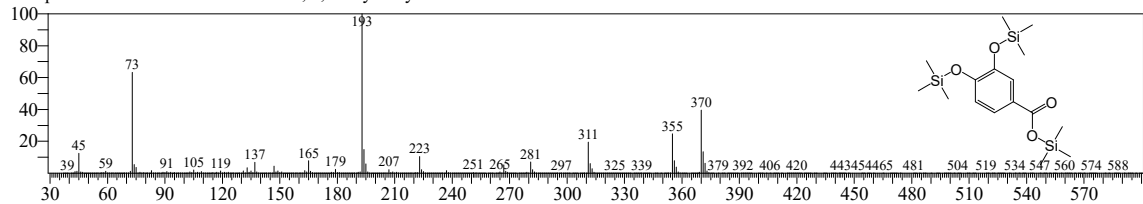



<< Target >>

Line#:16 R.Time:32.500(Scan#:5601) MassPeaks:273

RawMode:Averaged 32.495-32.505(5600-5602) BasePeak:207.05(827)

BG Mode:Calc. from Peak Group 1 - Event 1 Q3 Scan

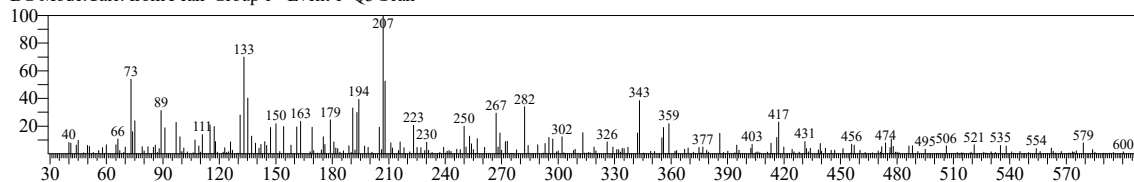

Hit#:1 Entry:211 Library:OA\_TMS\_DB5\_67min\_V3.lib

SI:45 Formula:C<sub>13</sub>H<sub>22</sub>O<sub>3</sub>Si<sub>2</sub> CAS:99-96-7 MolWeight:282 RetIndex:1636

CompName:4-Hydroxybenzoic acid-2TMS ; 4-hydroxybenzoic acid

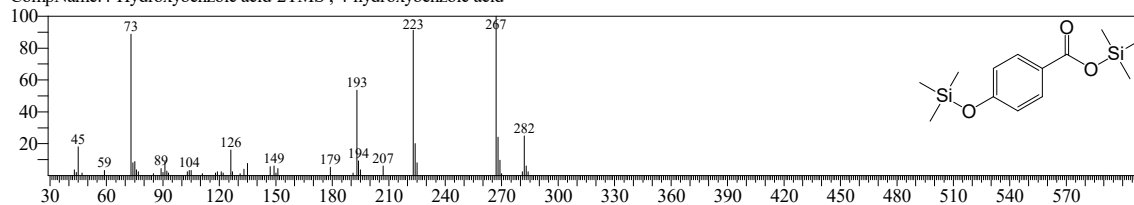

Hit#:2 Entry:179 Library:OA\_TMS\_DB5\_67min\_V3.lib

SI:44 Formula:C<sub>13</sub>H<sub>22</sub>O<sub>3</sub>Si<sub>2</sub> CAS:99-06-9 MolWeight:282 RetIndex:1572

CompName:3-Hydroxybenzoic acid-2TMS ; 3-hydroxybenzoic acid

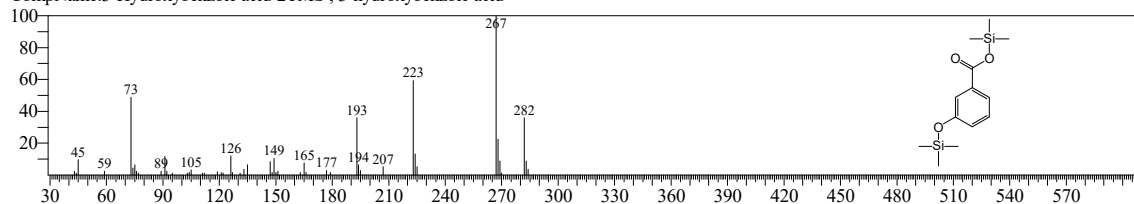

Hit#:3 Entry:291 Library:OA\_TMS\_DB5\_67min\_V3.lib

SI:43 Formula:C<sub>14</sub>H<sub>24</sub>O<sub>4</sub>Si<sub>2</sub> CAS:121-34-6 MolWeight:312 RetIndex:1775

CompName:3-Methoxy-4-hydroxybenzoic acid-2TMS ; 4-hydroxy-3-methoxybenzoic acid

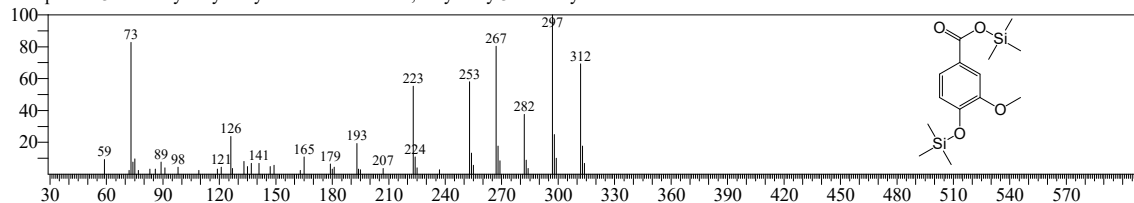

Hit#:4 Entry:194 Library:OA\_TMS\_DB5\_67min\_V3.lib

SI:39 Formula:C<sub>15</sub>H<sub>26</sub>O<sub>3</sub>Si<sub>2</sub> CAS:828-01-3 MolWeight:310 RetIndex:1599

CompName:3-Phenyllactic acid-2TMS ; 2-hydroxy-3-phenylpropanoic acid

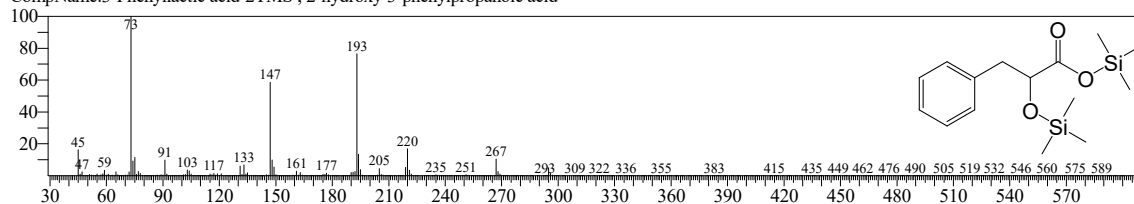

Hit#:5 Entry:315 Library:OA\_TMS\_DB5\_67min\_V3.lib

SI:39 Formula:C<sub>16</sub>H<sub>30</sub>O<sub>4</sub>Si<sub>3</sub> CAS:99-50-3 MolWeight:370 RetIndex:1833

CompName:Protocatechuic acid-3TMS ; 3,4-dihydroxybenzoic acid

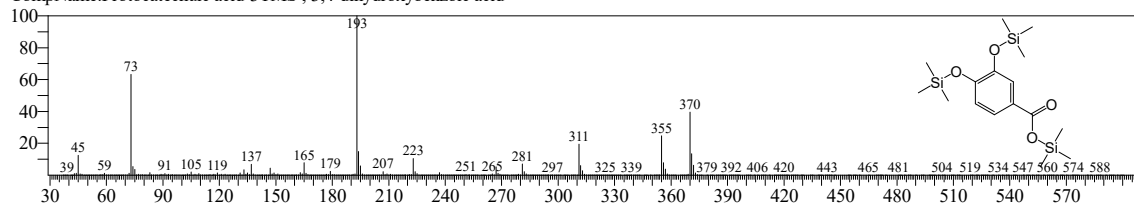

# TNAU

<< Target >>

Line#:17 R.Time:32.530(Scan#:5607) MassPeaks:266

RawMode:Averaged 32.525-32.535(5606-5608) BasePeak:133.05(716)

BG Mode:Calc. from Peak Group 1 - Event 1 Q3 Scan

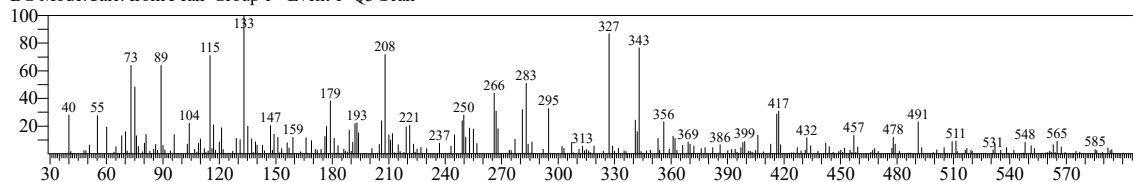

Hit#:1 Entry:203 Library:OA\_TMS\_DB5\_67min\_V3.lib

SI:37 Formula:C<sub>13</sub>H<sub>23</sub>NO<sub>2</sub>Si<sub>2</sub> CAS:118-92-3 MolWeight:281 RetIndex:1623

CompName:Anthranilic acid-2TMS ; 2-aminobenzoic acid

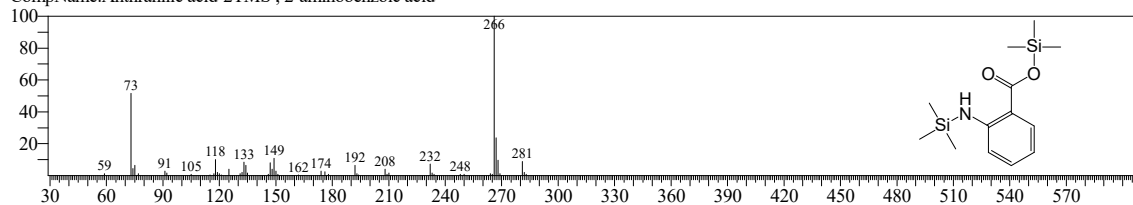

Hit#:2 Entry:328 Library:OA\_TMS\_DB5\_67min\_V3.lib

SI:36 Formula:C<sub>13</sub>H<sub>23</sub>NO<sub>2</sub>Si<sub>2</sub> CAS:150-13-0 MolWeight:281 RetIndex:1845

CompName:4-Aminobenzoic acid-2TMS ; 4-aminobenzoic acid

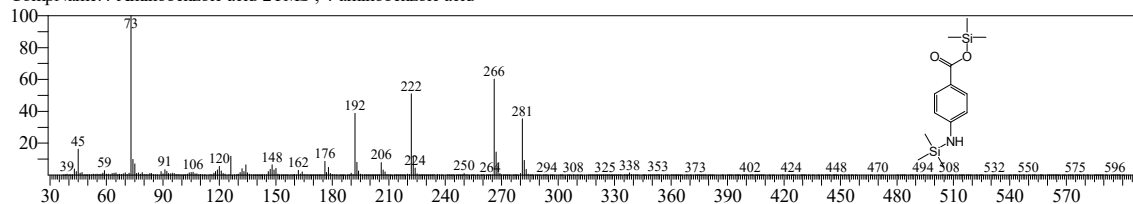

Hit#:3 Entry:472 Library:OA\_TMS\_DB5\_67min\_V3.lib

SI:34 Formula:C<sub>20</sub>H<sub>42</sub>O<sub>2</sub>Si<sub>2</sub> CAS:506-12-7 MolWeight:342 RetIndex:2146

CompName:Margaric acid-TMS ; heptadecanoic acid

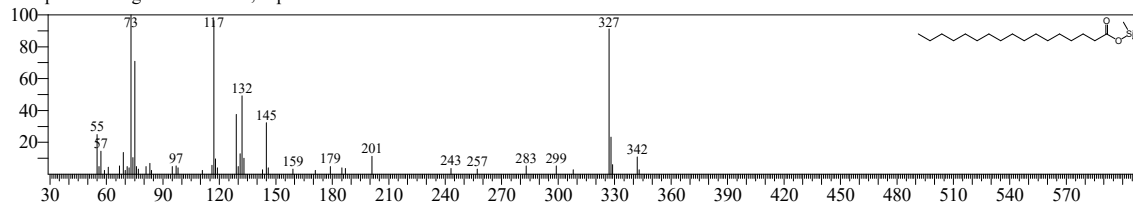

Hit#:4 Entry:194 Library:OA\_TMS\_DB5\_67min\_V3.lib

SI:33 Formula:C<sub>15</sub>H<sub>26</sub>O<sub>3</sub>Si<sub>2</sub> CAS:828-01-3 MolWeight:310 RetIndex:1599

CompName:3-Phenyllactic acid-2TMS ; 2-hydroxy-3-phenylpropanoic acid

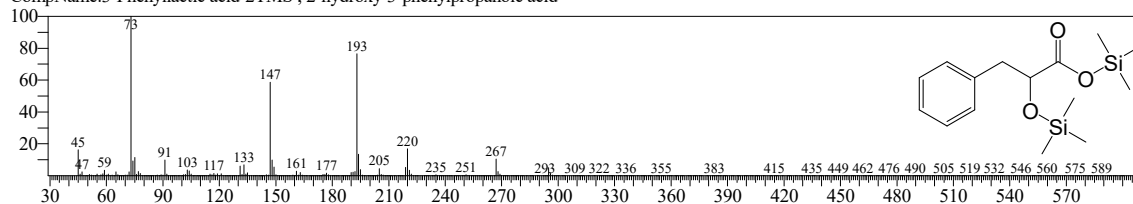

Hit#:5 Entry:138 Library:OA\_TMS\_DB5\_67min\_V3.lib

SI:32 Formula:C<sub>14</sub>H<sub>24</sub>O<sub>3</sub>Si<sub>2</sub> CAS:90-64-2 MolWeight:296 RetIndex:1486

CompName:Mandelic acid-2TMS ; 2-hydroxy-2-phenylacetic acid

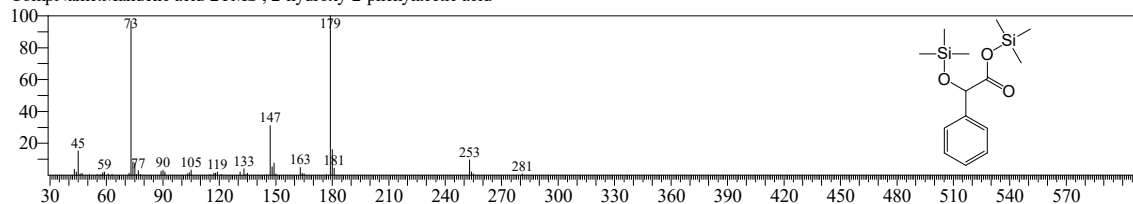

# TNAU

<< Target >>

Line#:18 R.Time:32.670(Scan#:5635) MassPeaks:325

RawMode:Averaged 32.665-32.675(5634-5636) BasePeak:343.05(557)

BG Mode:Calc. from Peak Group 1 - Event 1 Q3 Scan

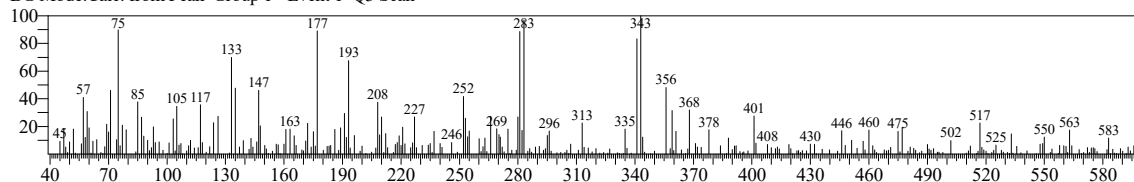

Hit#:1 Entry:60 Library:OA\_TMS\_DB5\_67min\_V3.lib

SI:28 Formula:C10H24O3Si2 CAS:591-81-1 MolWeight:248 RetIndex:1240

CompName:4-Hydroxybutyric acid-2TMS ; 4-hydroxybutanoic acid

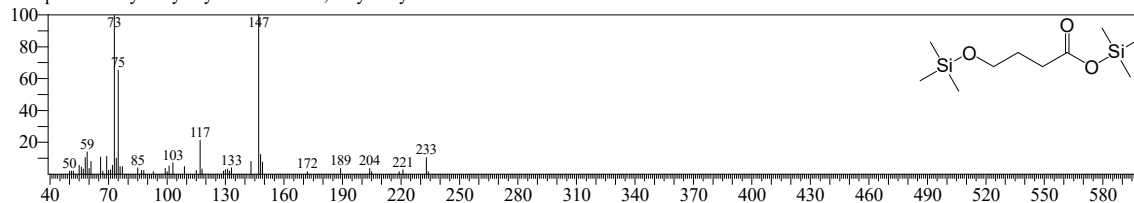

Hit#:2 Entry:150 Library:OA\_TMS\_DB5\_67min\_V3.lib

SI:26 Formula:C15H26O3Si2 CAS:515-30-0 MolWeight:310 RetIndex:1517

CompName:2-Phenyllactic acid-2TMS ; 2-hydroxy-3-phenylpropanoic acid

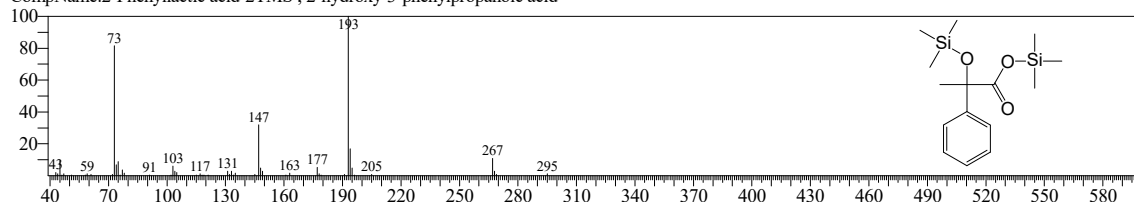

Hit#:3 Entry:35 Library:OA\_TMS\_DB5\_67min\_V3.lib

SI:26 Formula:C10H24O3Si2 CAS:300-85-6 MolWeight:248 RetIndex:1161

CompName:3-Hydroxybutyric acid-2TMS ; 3-hydroxybutanoic acid

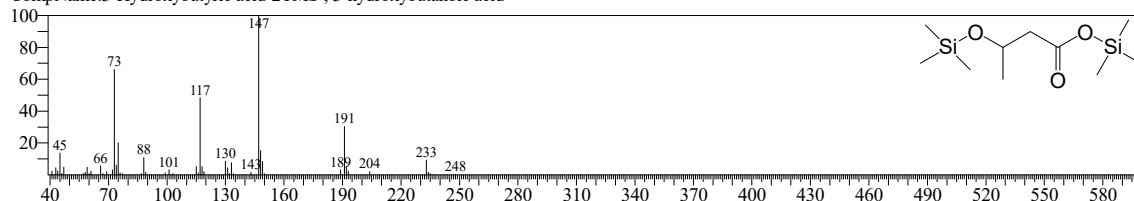

Hit#:4 Entry:491 Library:OA\_TMS\_DB5\_67min\_V3.lib

SI:26 Formula:C21H44O2Si CAS:57-11-4 MolWeight:356 RetIndex:2244

CompName:Stearic acid-TMS ; octadecanoic acid

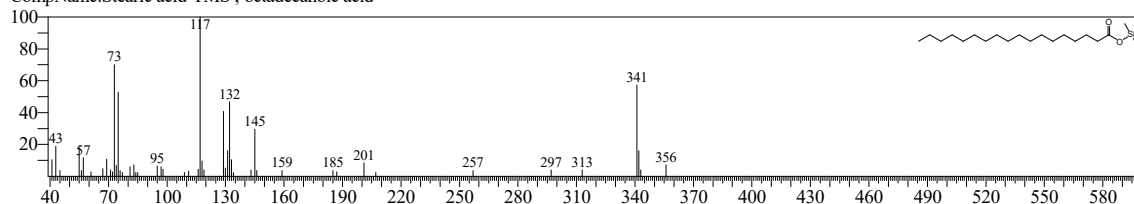

Hit#:5 Entry:24 Library:OA\_TMS\_DB5\_67min\_V3.lib

SI:26 Formula: CAS:0-00-0 MolWeight:236 RetIndex:1130

CompName:Oxalic acid-13C2-2TMS ;

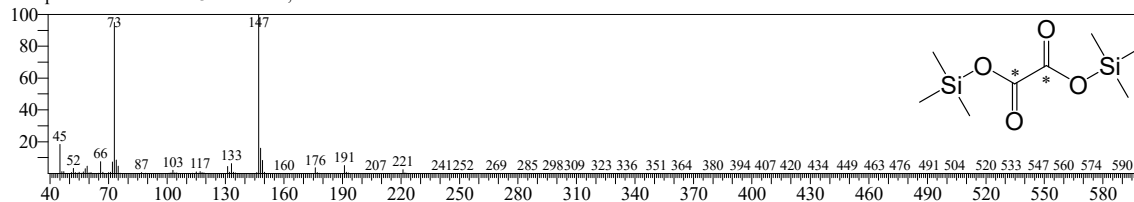

Supplement: Supplementary file 62 [file supplementary]
