# Supplementary material for: Comparative Metabolomics Profiling Reveals Key Metabolites and Associated Pathways Regulating Tuber Dormancy in White Yam (<em>Dioscorea rotundata</em>)
Source: Preprints.org preprint supplement (doi:10.20944/preprints202303.0378.v1), 2023-03-21

# TNAU

## Sample Information

Analyzed by : Admin  
 Analyzed : 05-Aug-22 1:02:35 PM  
 Sample Type : Unknown  
 Level # : 1  
 Sample Name : T101-2  
 Sample ID : T101-2  
 IS Amount : [1]=1  
 Sample Amount : 1  
 Dilution Factor : 1  
 Vial # : 31  
 Injection Volume : 1.00  
 Data File : D:\GCMS-8040NX\Aug 2022\Users\04.08.2022\Data files\04082022-032.qgd  
 Org Data File : D:\GCMS-8040NX\Aug 2022\Users\04.08.2022\Data files\04082022-032.qgd  
 Method File : D:\GCMS-8040NX\Aug 2022\Users\04.08.2022\Method file\27072022\_methodfile.qgm  
 Org Method File : D:\GCMS-8040NX\Aug 2022\Users\04.08.2022\Method file\27072022\_methodfile.qgm  
 Report File :  
 Tuning File : D:\GCMS-8040NX\Aug 2022\Tuning Data\TUNING 04082022.qgt  
 [Comment]  
 Jerry samples  
 Modified by : Admin  
 Modified : 05-Aug-22 4:47:44 PM

Chromatogram T101-2 D:\GCMS-8040NX\Aug 2022\Users\04.08.2022\Data files\04082022-032.qgd

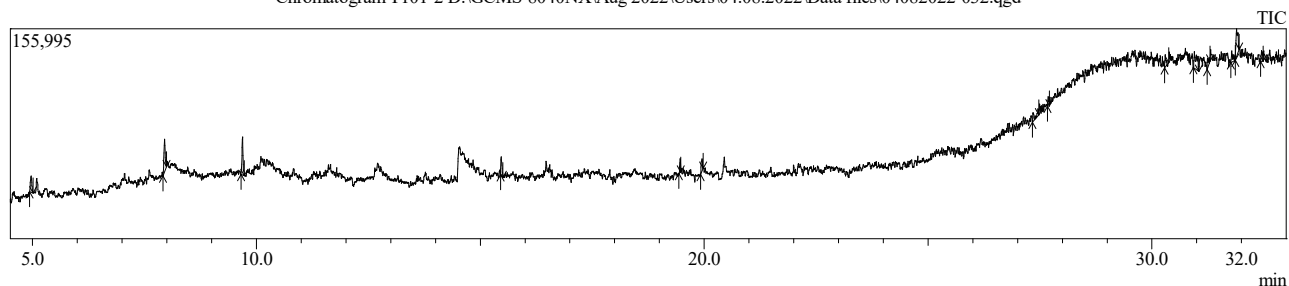

Peak Report TIC

| Peak# | R.Time | Area   | Area%  | Height | Height% | A/H  | Similarity | Name                                          |
|-------|--------|--------|--------|--------|---------|------|------------|-----------------------------------------------|
| 1     | 4.966  | 25192  | 6.70   | 11914  | 6.78    | 2.11 | 71         | 2-Propanol, 1,1'-oxybis-                      |
| 2     | 7.947  | 47496  | 12.63  | 24326  | 13.85   | 1.95 | 90         | Undecane                                      |
| 3     | 9.689  | 48560  | 12.91  | 28424  | 16.18   | 1.71 | 88         | Undecane                                      |
| 4     | 15.465 | 22472  | 5.97   | 13824  | 7.87    | 1.63 | 76         | 2,4-Di-tert-butylphenol                       |
| 5     | 19.465 | 13467  | 3.58   | 10432  | 5.94    | 1.29 | 72         | 1,2-Benzenedicarboxylic acid, bis(2-methylpro |
| 6     | 19.952 | 17467  | 4.64   | 8636   | 4.92    | 2.02 | 62         | Dimethylglycine-TMS                           |
| 7     | 27.340 | 23420  | 6.23   | 6315   | 3.59    | 3.71 | 39         | 4-Hydroxyphenyllactic acid-3TMS               |
| 8     | 27.680 | 8998   | 2.39   | 7013   | 3.99    | 1.28 | 37         | Anthranilic acid-2TMS                         |
| 9     | 30.295 | 13083  | 3.48   | 9031   | 5.14    | 1.45 | 36         | Epinephrine-3TMS                              |
| 10    | 30.948 | 51203  | 13.61  | 12364  | 7.04    | 4.14 | 33         | 3-(3-Hydroxyphenyl)-3-hydroxypropionic acid   |
| 11    | 31.240 | 14164  | 3.77   | 7494   | 4.27    | 1.89 | 40         | Galactose-5TMS(2)                             |
| 12    | 31.780 | 17021  | 4.52   | 7462   | 4.25    | 2.28 | 34         | Anthranilic acid-2TMS                         |
| 13    | 31.890 | 59585  | 15.84  | 20527  | 11.68   | 2.90 | 28         | Methyl arachidonate                           |
| 14    | 32.447 | 14031  | 3.73   | 7912   | 4.50    | 1.77 | 32         | Hypoxanthine-2TMS                             |
|       |        | 376159 | 100.00 | 175674 | 100.00  |      |            |                                               |

Library

# TNAU

<< Target >>

Line#:1 R.Time:4.965(Scan#:94) MassPeaks:284

RawMode:Averaged 4.960-4.970(93-95) BasePeak:89.00(2620)

BG Mode:Calc. from Peak Group 1 - Event 1 Q3 Scan

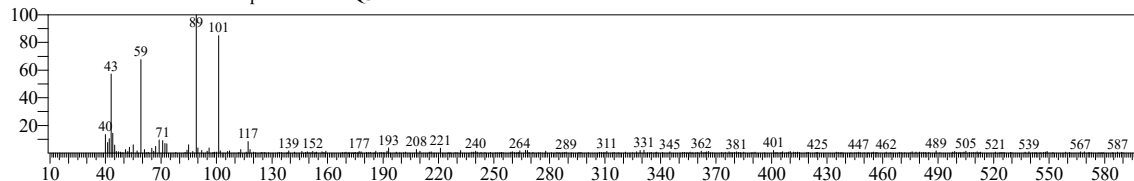

Hit#:1 Entry:7425 Library:NIST20R.lib

SI:71 Formula:C6H14O3 CAS:110-98-5 MolWeight:134 RetIndex:1018

CompName:2-Propanol, 1,1'-oxybis- 2-Propanol, 1,1'-oxydi- Bis(2-hydroxypropyl) ether 1,1'-Oxydi-2-propanol 2,2'-Dihydroxydipropyl ether

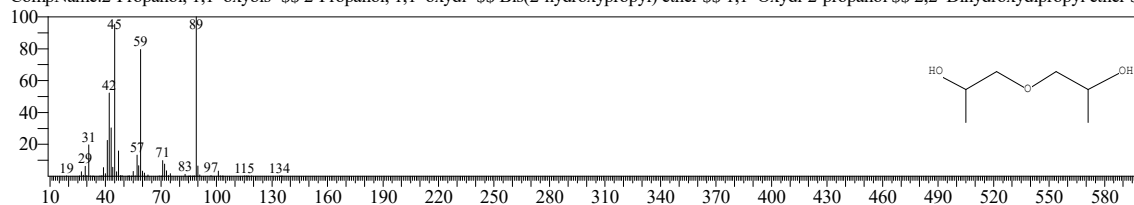

Hit#:2 Entry:22897 Library:NIST20M1.lib

SI:71 Formula:C8H16O3 CAS:0-00-0 MolWeight:160 RetIndex:931

CompName:2-Hydroxyisocaproic acid, methyl ether, methyl ester

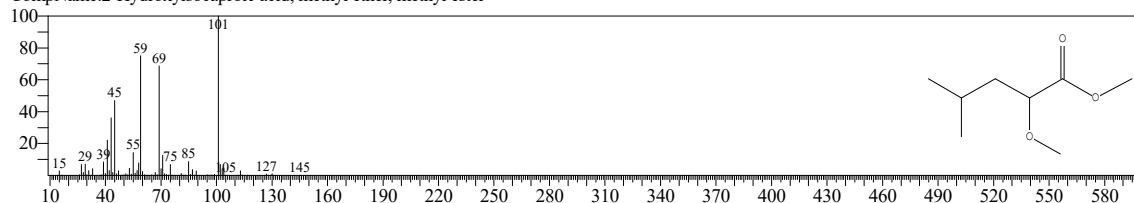

Hit#:3 Entry:9263 Library:NIST20M1.lib

SI:71 Formula:C6H12O3 CAS:21983-72-2 MolWeight:132 RetIndex:821

CompName:3,3-Dimethoxy-2-butanone

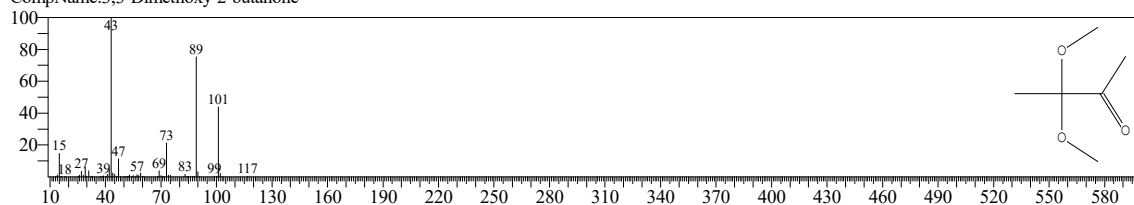

Hit#:4 Entry:81501 Library:NIST20M1.lib

SI:70 Formula:C13H28OSi CAS:0-00-0 MolWeight:228 RetIndex:1097

CompName:4-Methoxy-6-methyl-3-(trimethylsilyl)methyl-1-heptene

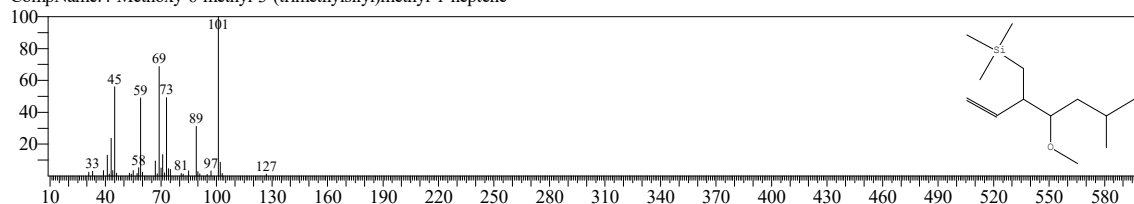

Hit#:5 Entry:1 Library:FA ME SP2560 EI V3.lib

SI:54 Formula:C5H10O2 CAS:107-92-6 MolWeight:102 RetIndex:1113

CompName:Methyl butanoate ; Butanoic acid

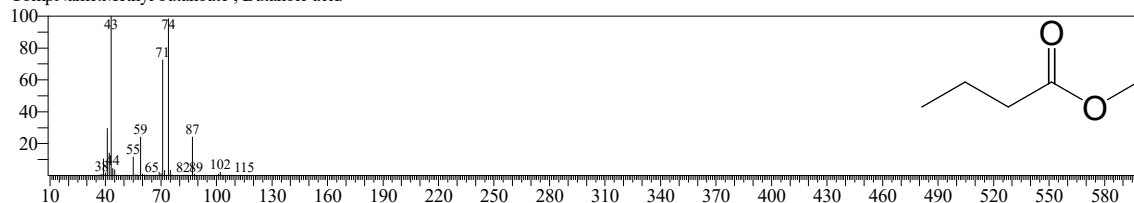

# TNAU

<< Target >>

Line#:2 R.Time:7.945(Scan#:690) MassPeaks:247

RawMode:Averaged 7.940-7.950(689-691) BasePeak:57.05(6028)

BG Mode:Calc. from Peak Group 1 - Event 1 Q3 Scan

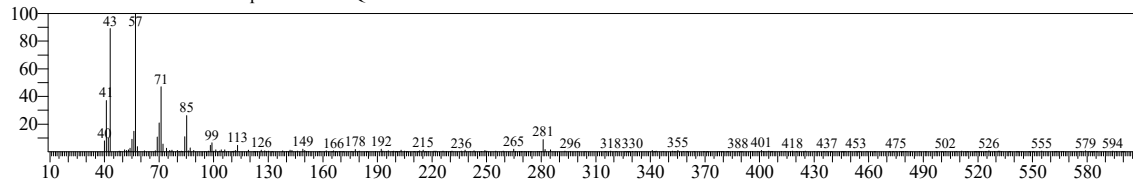

Hit#:1 Entry:21042 Library:NIST20M1.lib

SI:90 Formula:C11H24 CAS:1120-21-4 MolWeight:156 RetIndex:1100

CompName:Undecane \$\$ n-Undecane \$\$ Hendecane \$\$ n-C11H24 \$\$ UN 2330

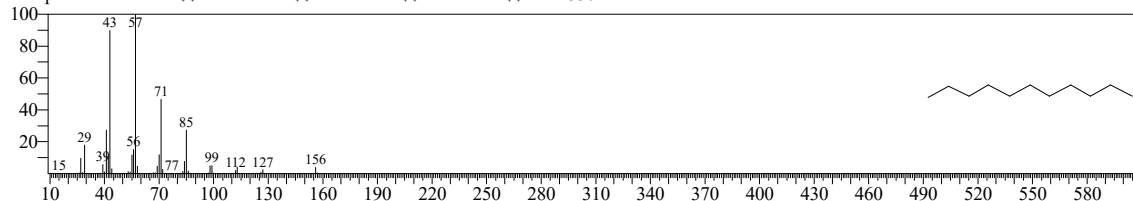

Hit#:2 Entry:40226 Library:NIST20M1.lib

SI:89 Formula:C13H28 CAS:629-50-5 MolWeight:184 RetIndex:1300

CompName:Tridecane \$\$ n-Tridecane \$\$ Tridecane, n-

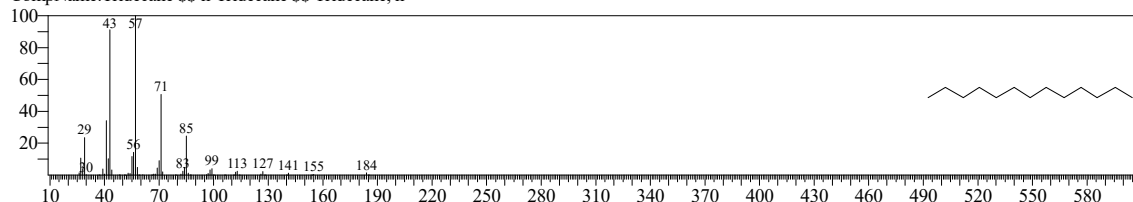

Hit#:3 Entry:9444 Library:NIST20R.lib

SI:88 Formula:C10H22 CAS:124-18-5 MolWeight:142 RetIndex:1000

CompName:Decane \$\$ n-Decane \$\$ n-C10H22 \$\$ UN 2247

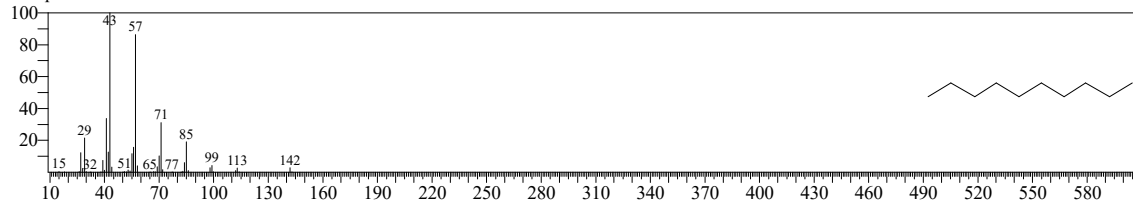

Hit#:4 Entry:27737 Library:NIST20R.lib

SI:88 Formula:C16H34 CAS:544-76-3 MolWeight:226 RetIndex:1600

CompName:Hexadecane \$\$ n-Cetane \$\$ n-Hexadecane \$\$ Cetane

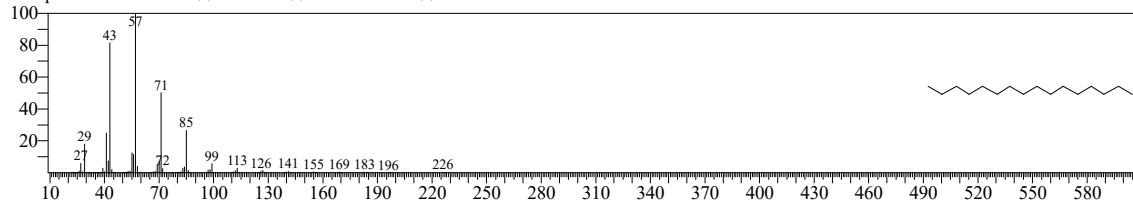

Hit#:5 Entry:13631 Library:NIST20M1.lib

SI:88 Formula:C10H22 CAS:15869-93-9 MolWeight:142 RetIndex:887

CompName:Octane, 3,5-dimethyl- \$\$ 3,5-Dimethyloctane

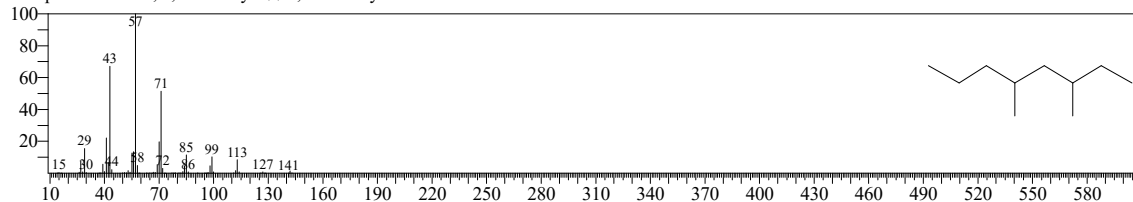

# TNAU

<< Target >>

Line#3 R.Time:9.690(Scan#:1039) MassPeaks:316

RawMode:Averaged 9.685-9.695(1038-1040) BasePeak:57.05(5566)

BG Mode:Calc. from Peak Group 1 - Event 1 Q3 Scan

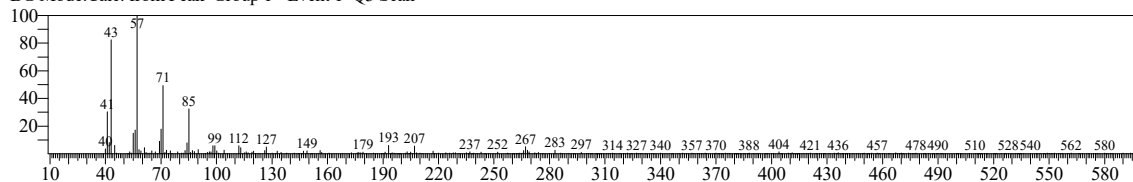

Hit#:1 Entry:21042 Library:NIST20M1.lib

SI:88 Formula:C11H24 CAS:1120-21-4 MolWeight:156 RetIndex:1100

CompName:Undecane \$\$ n-Undecane \$\$ Hendecane \$\$ n-C11H24 \$\$ UN 2330

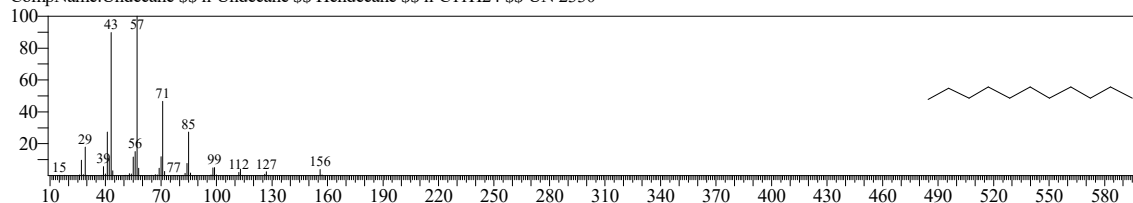

Hit#:2 Entry:40226 Library:NIST20M1.lib

SI:87 Formula:C13H28 CAS:629-50-5 MolWeight:184 RetIndex:1300

CompName:Tridecane \$\$ n-Tridecane \$\$ Tridecane, n-

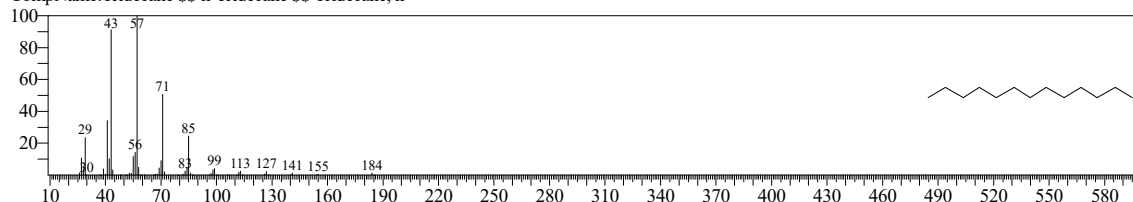

Hit#:3 Entry:30057 Library:NIST20M1.lib

SI:87 Formula:C12H26 CAS:112-40-3 MolWeight:170 RetIndex:1200

CompName:Dodecane \$\$ n-Dodecane \$\$ Adakane 12 \$\$ Ba 51-090453 \$\$ CH3(CH2)10CH3 \$\$ Bihexyl \$\$ Dihexyl \$\$ Duodecane \$\$ NSC 8714

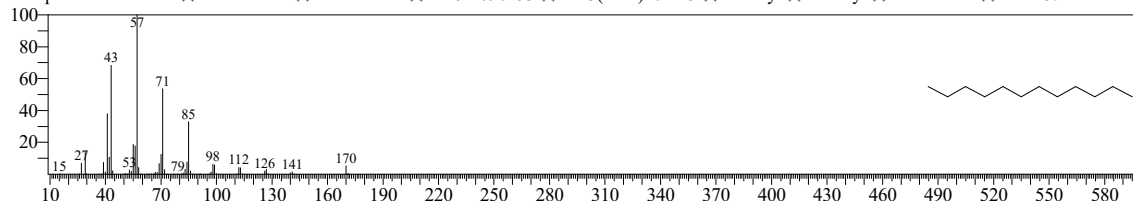

Hit#:4 Entry:27737 Library:NIST20R.lib

SI:87 Formula:C16H34 CAS:544-76-3 MolWeight:226 RetIndex:1600

CompName:Hexadecane \$\$ n-Cetane \$\$ n-Hexadecane \$\$ Cetane

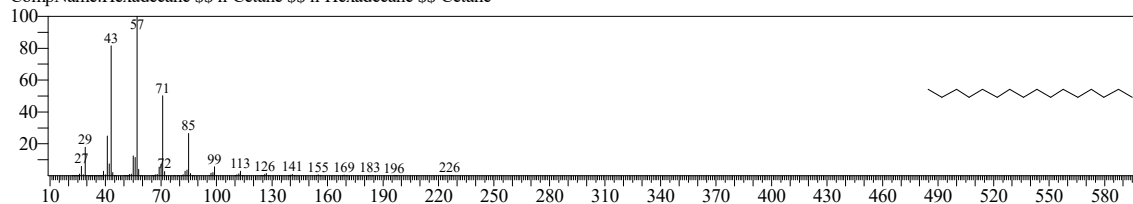

Hit#:5 Entry:40248 Library:NIST20M1.lib

SI:86 Formula:C13H28 CAS:17301-29-0 MolWeight:184 RetIndex:1185

CompName:Undecane, 3,7-dimethyl- \$\$ 3,7-Dimethylundecane #

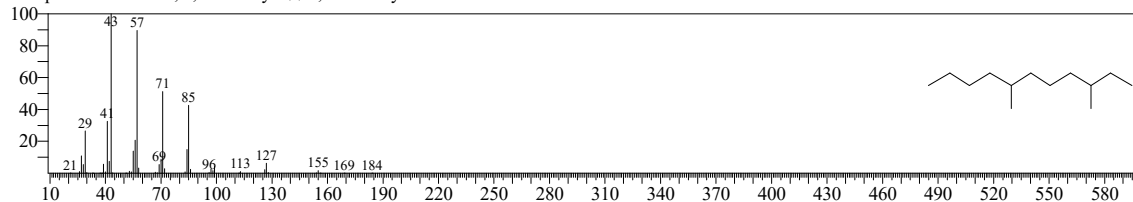

# TNAU

<< Target >>

Line#:4 R.Time:15.465(Scan#:2194) MassPeaks:312

RawMode:Averaged 15.460-15.470(2193-2195) BasePeak:191.10(4034)

BG Mode:Calc. from Peak Group 1 - Event 1 Q3 Scan

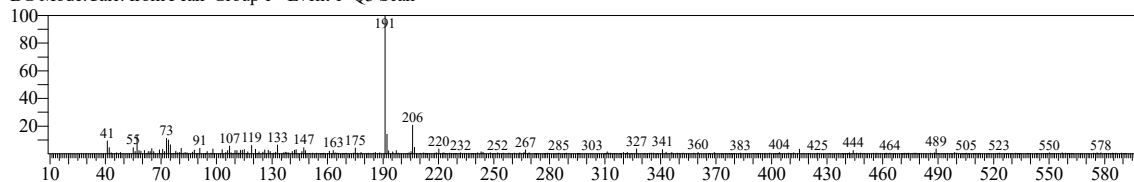

Hit#:1 Entry:24088 Library:NIST20R.lib

SI:76 Formula:C14H22O CAS:96-76-4 MolWeight:206 RetIndex:1555

CompName:2,4-Di-tert-butylphenol \$\$ Phenol, 2,4-bis(1,1-dimethylethyl)- \$\$ Phenol, 2,4-di-tert-butyl- \$\$ 2,4-di-t-Butylphenol \$\$ 1-Hydroxy-2,4-di-tert-bu

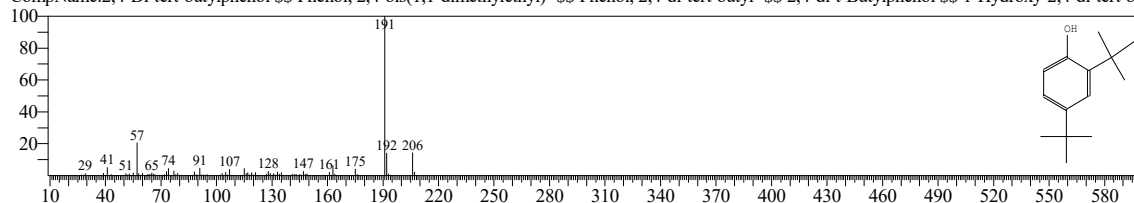

Hit#:2 Entry:24098 Library:NIST20R.lib

SI:76 Formula:C14H22O CAS:5875-45-6 MolWeight:206 RetIndex:1555

CompName:Phenol, 2,5-bis(1,1-dimethylethyl)- \$\$ Phenol, 2,5-di-tert-butyl- \$\$ 2,5-Di-tert-butylphenol \$\$ 2,5-bis(1,1-Dimethylethyl)phenol

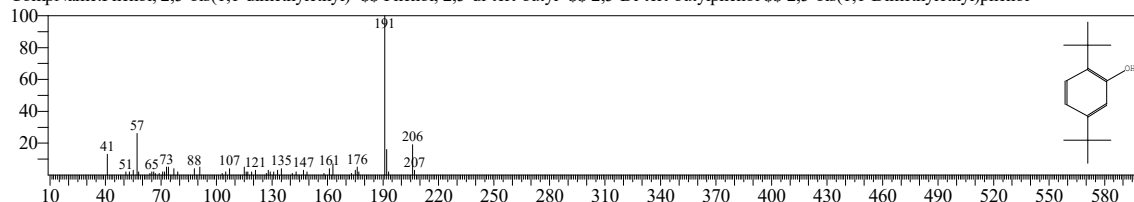

Hit#:3 Entry:170993 Library:NIST20M1.lib

SI:76 Formula:C19H30O3 CAS:166273-38-7 MolWeight:306 RetIndex:2255

CompName:Pentanoic acid, 5-hydroxy-, 2,4-di-t-butylphenyl esters \$\$ 2,4-Ditert-butylphenyl 5-hydroxypentanoate #

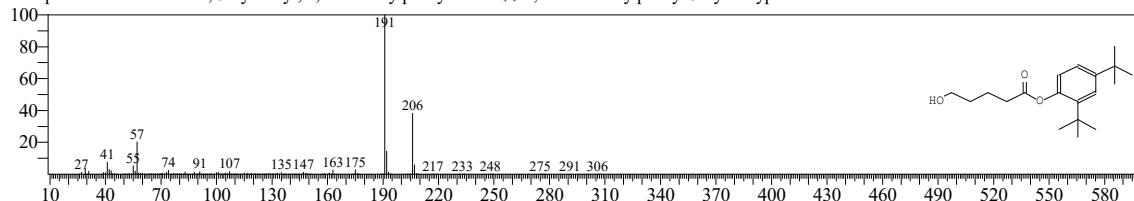

Hit#:4 Entry:24110 Library:NIST20R.lib

SI:76 Formula:C14H22O CAS:1138-52-9 MolWeight:206 RetIndex:1555

CompName:Phenol, 3,5-bis(1,1-dimethylethyl)- \$\$ Phenol, 3,5-di-tert-butyl- \$\$ 3,5-Di-tert-butylphenol \$\$ Phenol, 3,5-bis(t-butyl) \$\$ 3,5-Di-t-butylphenol \$

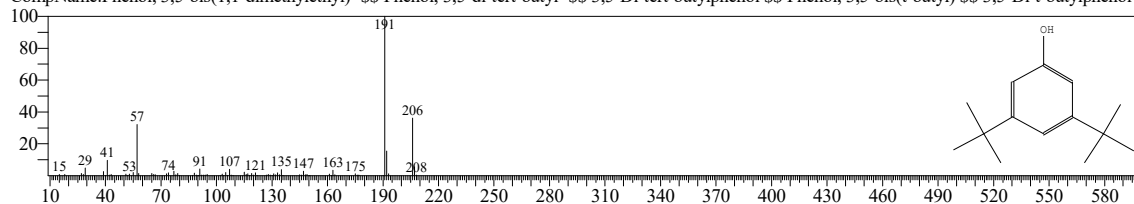

Hit#:5 Entry:24082 Library:NIST20R.lib

SI:75 Formula:C14H22O CAS:128-39-2 MolWeight:206 RetIndex:1555

CompName:Phenol, 2,6-bis(1,1-dimethylethyl)- \$\$ Phenol, 2,6-di-tert-butyl- \$\$ 2,6-Bis(tert-butyl)phenol \$\$ 2,6-Bis(1,1-dimethylethyl)phenol \$\$ 2,6-Di-tert

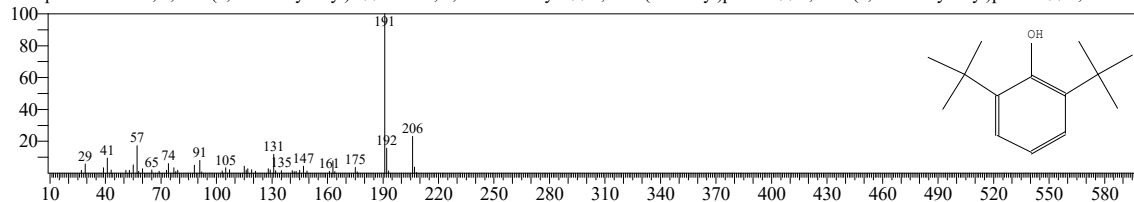

# TNAU

<< Target >>

Line#5 R.Time:19.465(Scan#:2994) MassPeaks:285

RawMode:Averaged 19.460-19.470(2993-2995) BasePeak:149.00(3386)

BG Mode:Calc. from Peak Group 1 - Event 1 Q3 Scan

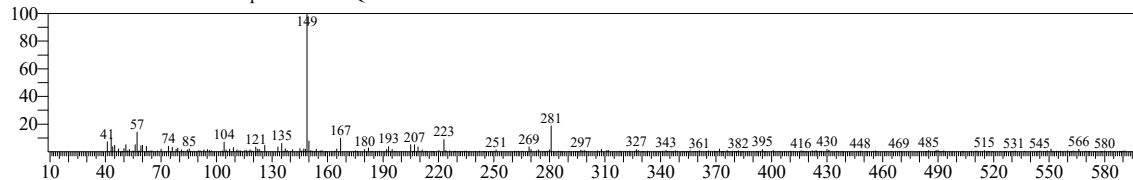

Hit#:1 Entry:33853 Library:NIST20R.lib

SI:72 Formula:C16H22O4 CAS:84-69-5 MolWeight:278 RetIndex:1908

CompName:1,2-Benzenedicarboxylic acid, bis(2-methylpropyl) ester \$\$ Phthalic acid, diisobutyl ester \$\$ Diisobutyl phthalate \$\$ Hexaplas M/1B \$\$ Isobuty

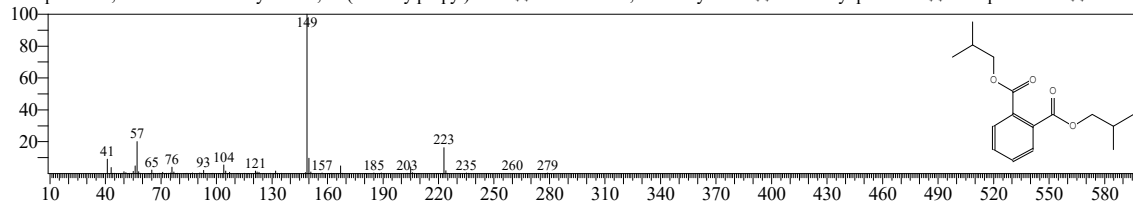

Hit#:2 Entry:187175 Library:NIST20M1.lib

SI:71 Formula:C19H28O4 CAS:0-00-0 MolWeight:320 RetIndex:2143

CompName:Phthalic acid, 5-methylhex-2-yl isobutyl ester

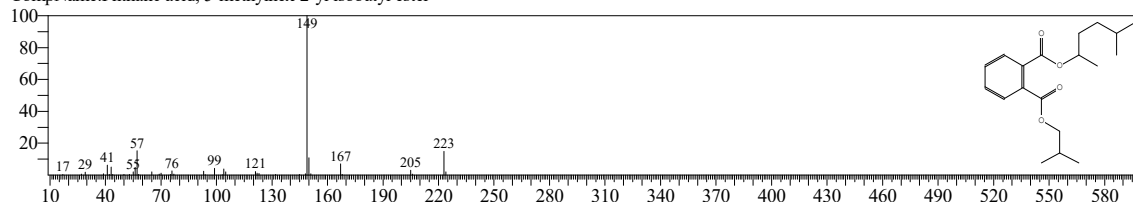

Hit#:3 Entry:187236 Library:NIST20M1.lib

SI:70 Formula:C19H28O4 CAS:0-00-0 MolWeight:320 RetIndex:2207

CompName:Phthalic acid, 5-methylhex-2-yl butyl ester

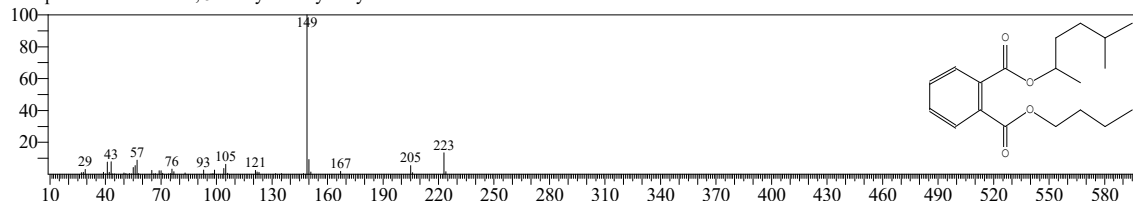

Hit#:4 Entry:218481 Library:NIST20M1.lib

SI:70 Formula:C21H32O4 CAS:0-00-0 MolWeight:348 RetIndex:2470

CompName:Phthalic acid, isobutyl nonyl ester

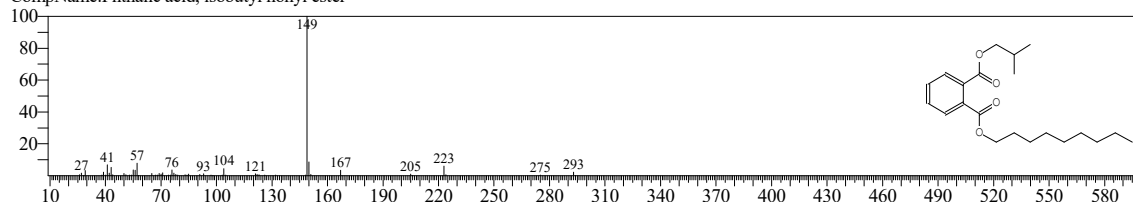

Hit#:5 Entry:187333 Library:NIST20M1.lib

SI:70 Formula:C19H28O4 CAS:0-00-0 MolWeight:320 RetIndex:2207

CompName:Phthalic acid, hept-2-yl isobutyl ester

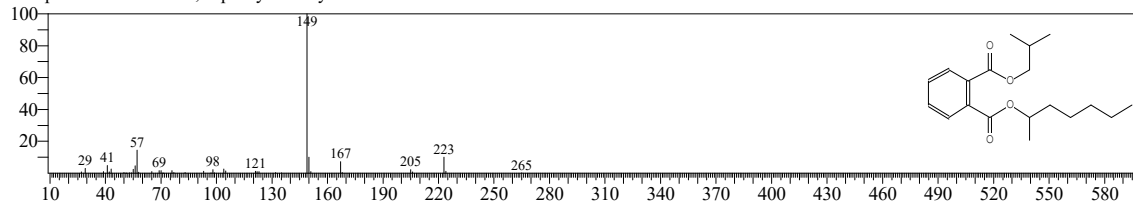

# TNAU

<< Target >>

Line#:6 R.Time:19.950(Scan#:3091) MassPeaks:299

RawMode:Averaged 19.945-19.955(3090-3092) BasePeak:58.10(3667)

BG Mode:Calc. from Peak Group 1 - Event 1 Q3 Scan

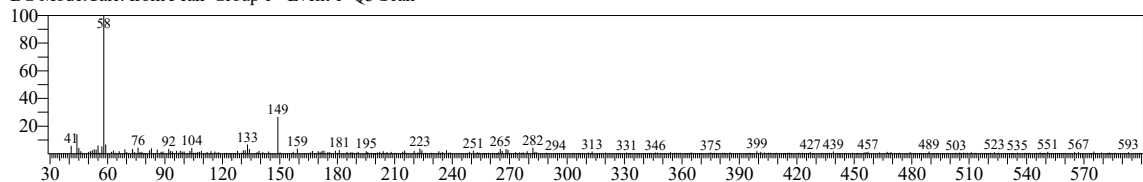

Hit#:1 Entry:1 Library:OA TMS DB5\_67min\_V3.lib

SI:62 Formula:C7H17NO2Si CAS:1118-68-9 MolWeight:175 RetIndex:990

CompName:Dimethylglycine-TMS ; 2-(dimethylamino)acetic acid

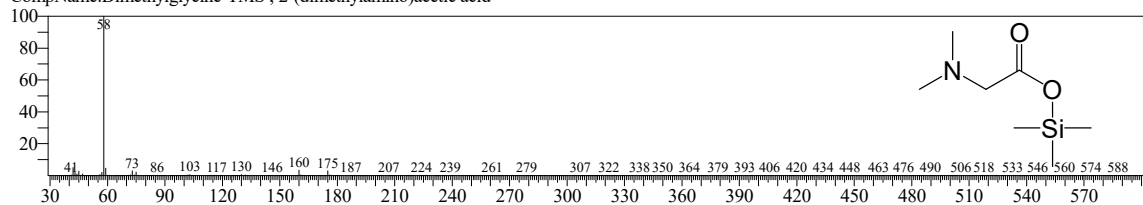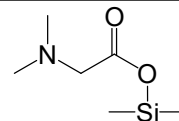

Hit#:2 Entry:138 Library:OA TMS DB5\_67min\_V3.lib

SI:40 Formula:C14H24O3Si2 CAS:90-64-2 MolWeight:296 RetIndex:1486

CompName:Mandelic acid-2TMS ; 2-hydroxy-2-phenylacetic acid

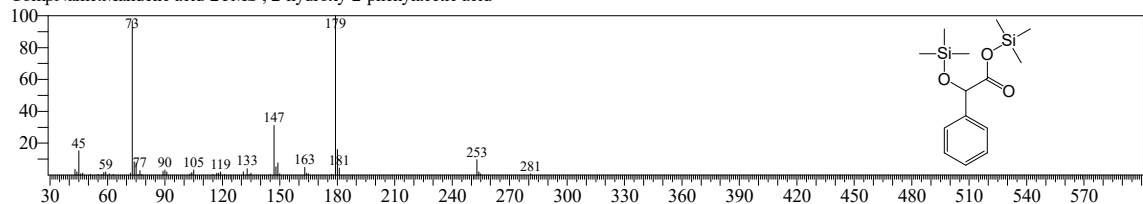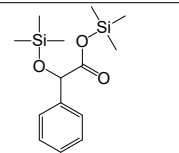

Hit#:3 Entry:133 Library:OA TMS DB5\_67min\_V3.lib

SI:39 Formula:C14H35NO4Si3 CAS:533-50-6 MolWeight:365 RetIndex:1479

CompName:Erythrulose-meto-3TMS(1) ; (3S)-1,3,4-trihydroxybutan-2-one

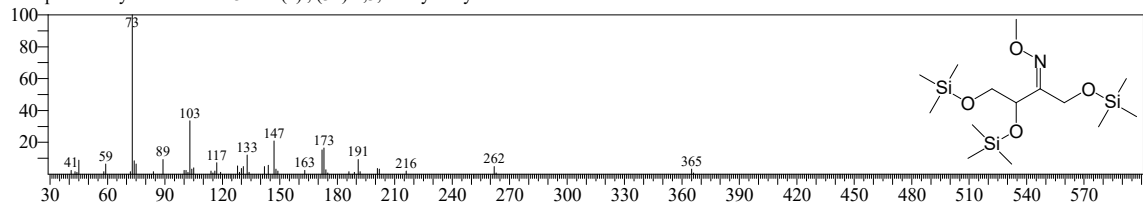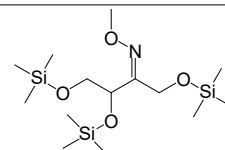

Hit#:4 Entry:62 Library:OA TMS DB5\_67min\_V3.lib

SI:39 Formula:C12H28O3Si2 CAS:20312-37-2 MolWeight:276 RetIndex:1244

CompName:2-Hydroxyisocaproic acid-2TMS ; (2R)-2-hydroxy-4-methylpentanoic acid

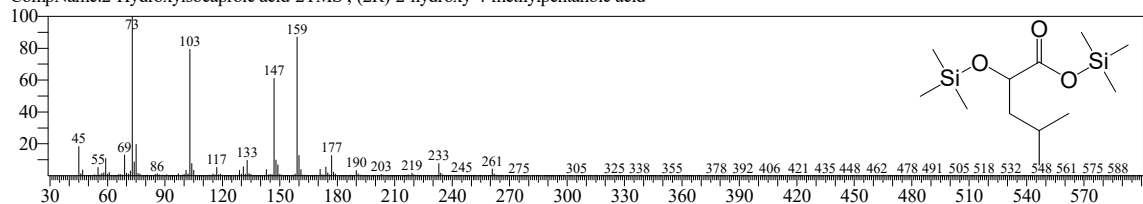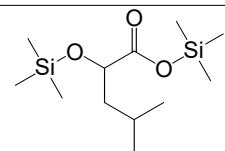

Hit#:5 Entry:10 Library:OA TMS DB5\_67min\_V3.lib

SI:39 Formula:C10H24O3Si2 CAS:594-61-6 MolWeight:248 RetIndex:1067

CompName:2-Hydroxyisobutyric acid-2TMS ; 2-hydroxy-2-methylpropanoic acid

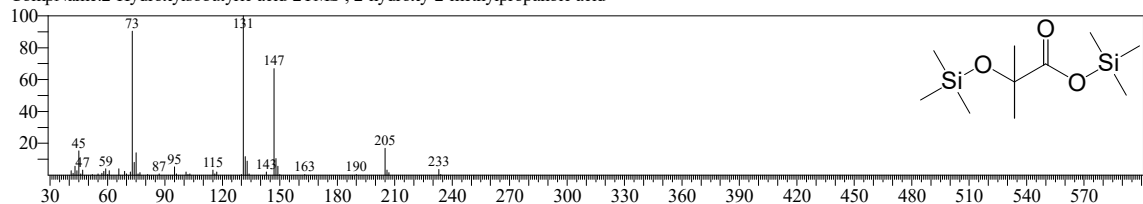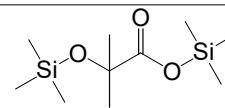

# TNAU

<< Target >>

Line#:7 R.Time:27.340(Scan#:4569) MassPeaks:304

RawMode:Averaged 27.335-27.345(4568-4570) BasePeak:281.00(1082)

BG Mode:Calc. from Peak Group 1 - Event 1 Q3 Scan

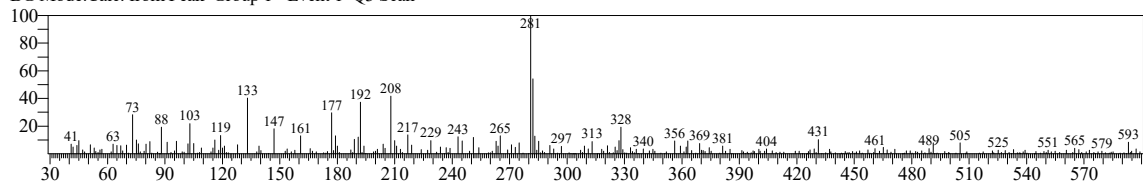

Hit#:1 Entry:382 Library:OA\_TMS\_DB5\_67min\_V3.lib

SI:39 Formula:C18H34O4Si3 CAS:6482-98-0 MolWeight:398 RetIndex:1918

CompName:4-Hydroxyphenyllactic acid-3TMS ; 2-hydroxy-3-(4-hydroxyphenyl)propanoate

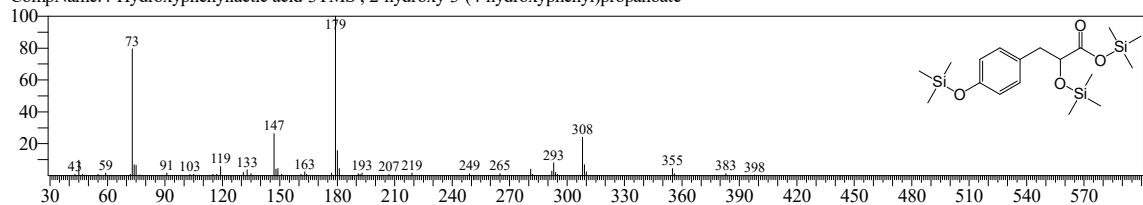

Hit#:2 Entry:328 Library:OA\_TMS\_DB5\_67min\_V3.lib

SI:37 Formula:C13H23NO2Si2 CAS:150-13-0 MolWeight:281 RetIndex:1845

CompName:4-Aminobenzoic acid-2TMS ; 4-aminobenzoic acid

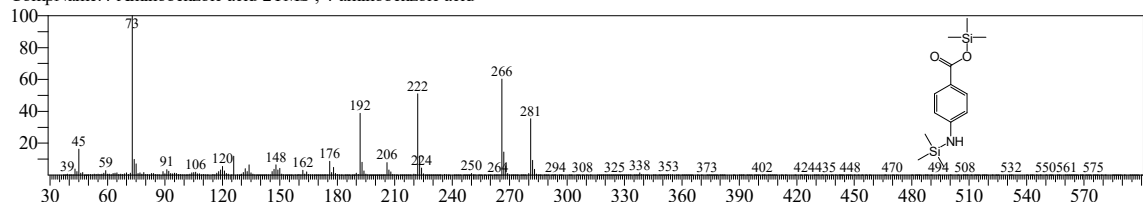

Hit#:3 Entry:195 Library:OA\_TMS\_DB5\_67min\_V3.lib

SI:36 Formula:C15H26O3Si2 CAS:529-64-6 MolWeight:310 RetIndex:1600

CompName:Tropic acid-2TMS ; 3-hydroxy-2-phenylpropanoic acid

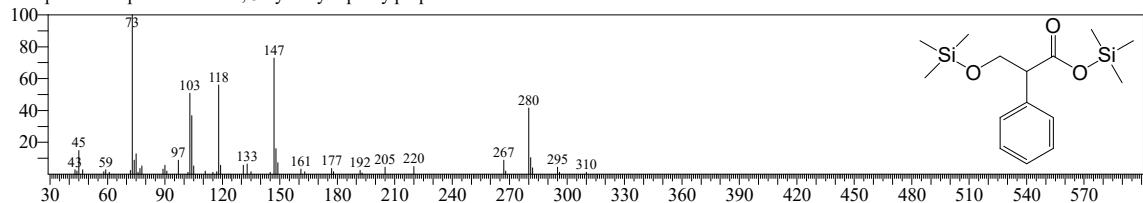

Hit#:4 Entry:200 Library:OA\_TMS\_DB5\_67min\_V3.lib

SI:36 Formula:C14H24O3Si2 CAS:621-37-4 MolWeight:296 RetIndex:1617

CompName:3-Hydroxyphenylacetic acid-2TMS ; 2-(3-hydroxyphenyl)acetic acid

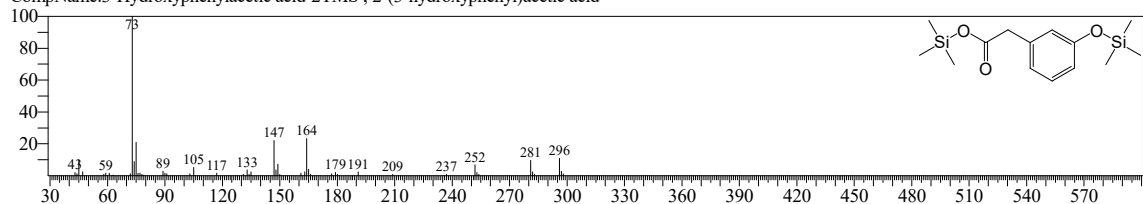

Hit#:5 Entry:535 Library:OA\_TMS\_DB5\_67min\_V3.lib

SI:36 Formula:C22H44N4O5Si4 CAS:58-63-9 MolWeight:556 RetIndex:2605

CompName:Inosine-4TMS ; 9-[(2R,3R,4S,5R)-3,4-dihydroxy-5-(hydroxymethyl)oxolan-2-yl]-3H-purin-6-one

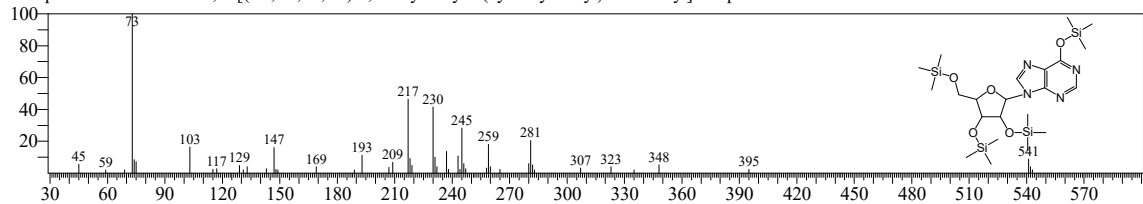



# TNAU

<< Target >>

Line#:8 R.Time:27.680(Scan#:4637) MassPeaks:309

RawMode:Averaged 27.675-27.685(4636-4638) BasePeak:281.00(2101)

BG Mode:Calc. from Peak Group 1 - Event 1 Q3 Scan

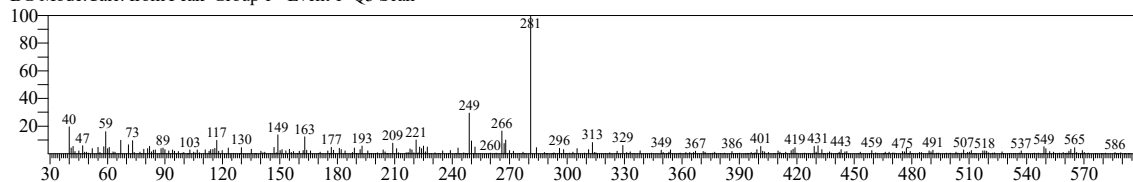

Hit#:1 Entry:203 Library:OA\_TMS\_DB5\_67min\_V3.lib

SI:37 Formula:C13H23NO2Si2 CAS:118-92-3 MolWeight:281 RetIndex:1623

CompName:Anthranilic acid-2TMS ; 2-aminobenzoic acid

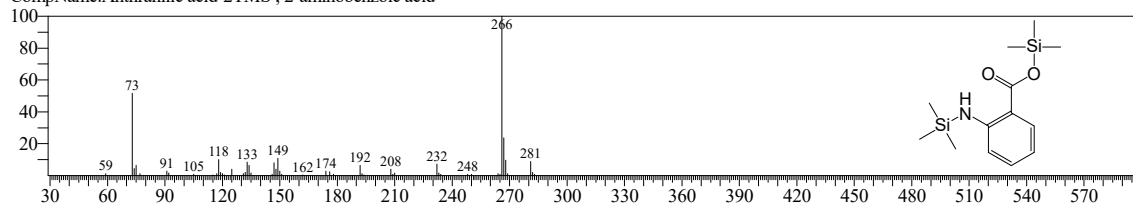

Hit#:2 Entry:211 Library:OA\_TMS\_DB5\_67min\_V3.lib

SI:36 Formula:C13H22O3Si2 CAS:99-96-7 MolWeight:282 RetIndex:1636

CompName:4-Hydroxybenzoic acid-2TMS ; 4-hydroxybenzoic acid

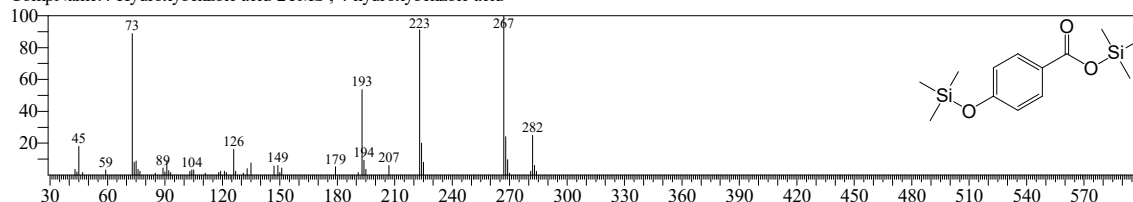

Hit#:3 Entry:328 Library:OA\_TMS\_DB5\_67min\_V3.lib

SI:36 Formula:C13H23NO2Si2 CAS:150-13-0 MolWeight:281 RetIndex:1845

CompName:4-Aminobenzoic acid-2TMS ; 4-aminobenzoic acid

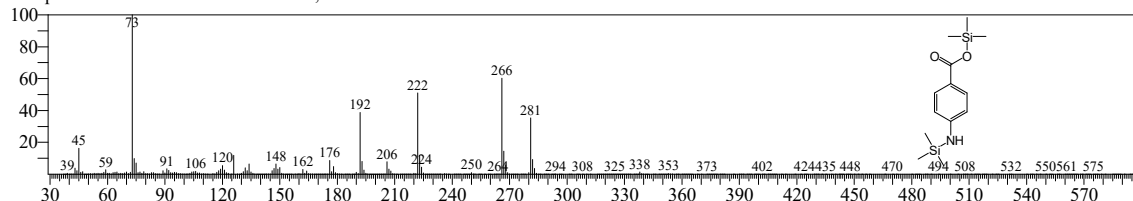

Hit#:4 Entry:200 Library:OA\_TMS\_DB5\_67min\_V3.lib

SI:33 Formula:C14H24O3Si2 CAS:621-37-4 MolWeight:296 RetIndex:1617

CompName:3-Hydroxyphenylacetic acid-2TMS ; 2-(3-hydroxyphenyl)acetic acid

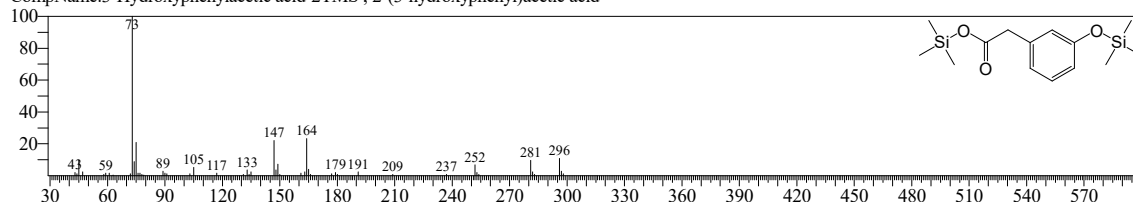

Hit#:5 Entry:184 Library:OA\_TMS\_DB5\_67min\_V3.lib

SI:33 Formula:C14H24O3Si2 CAS:614-75-5 MolWeight:296 RetIndex:1579

CompName:2-Hydroxyphenylacetic acid-2TMS ; 2-(2-hydroxyphenyl)acetic acid

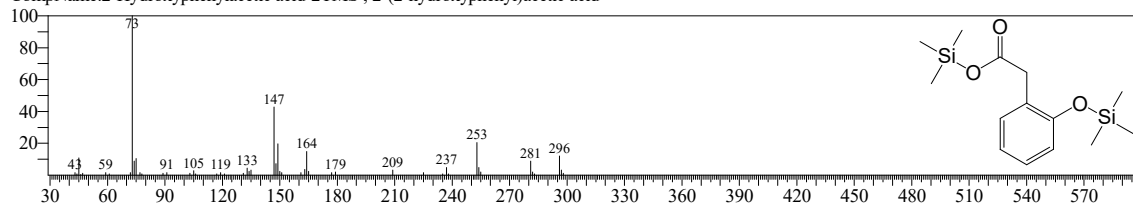

# TNAU

<< Target >>

Line#9 R.Time:30.295(Scan#:5160) MassPeaks:302

RawMode:Averaged 30.290-30.300(5159-5161) BasePeak:40.00(913)

BG Mode:Calc. from Peak Group 1 - Event 1 Q3 Scan

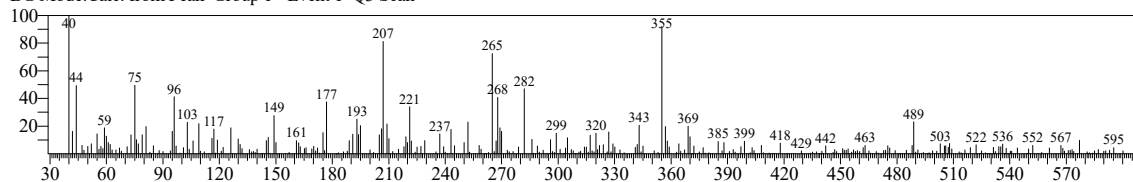

Hit#:1 Entry:343 Library:OA\_TMS\_DB5\_67min\_V3.lib

SI:36 Formula:C18H37NO3Si3 CAS:51-43-4 MolWeight:399 RetIndex:1868

CompName:Epinephrine-3TMS ; 4-[(1R)-1-hydroxy-2-(methylamino)ethyl]benzene-1,2-diol

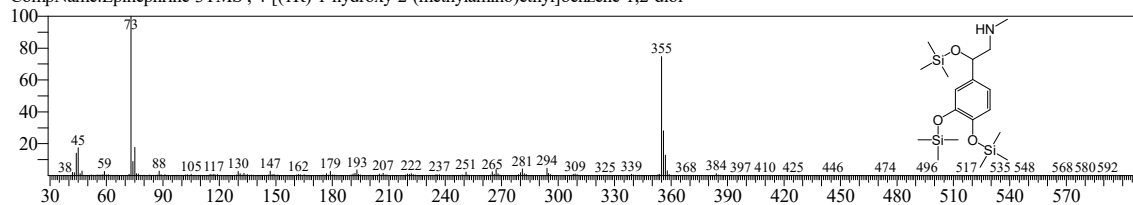

Hit#:2 Entry:402 Library:OA\_TMS\_DB5\_67min\_V3.lib

SI:35 Formula:C20H42O4Si4 CAS:775-01-9 MolWeight:458 RetIndex:1942

CompName:3,4-Dihydroxymandelic acid-4TMS ; 2-(3,4-dihydroxyphenyl)-2-hydroxyacetic acid

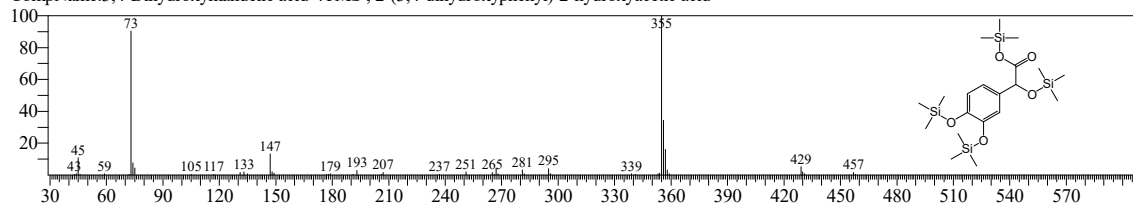

Hit#:3 Entry:315 Library:OA\_TMS\_DB5\_67min\_V3.lib

SI:31 Formula:C16H30O4Si3 CAS:99-50-3 MolWeight:370 RetIndex:1833

CompName:Protocatechuic acid-3TMS ; 3,4-dihydroxybenzoic acid

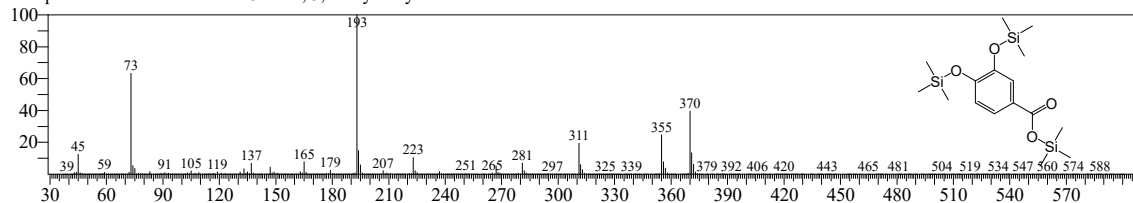

Hit#:4 Entry:294 Library:OA\_TMS\_DB5\_67min\_V3.lib

SI:26 Formula:C15H26O4Si2 CAS:306-08-1 MolWeight:326 RetIndex:1782

CompName:Homovanillic acid-2TMS ; 2-(4-hydroxy-3-methoxyphenyl)acetic acid

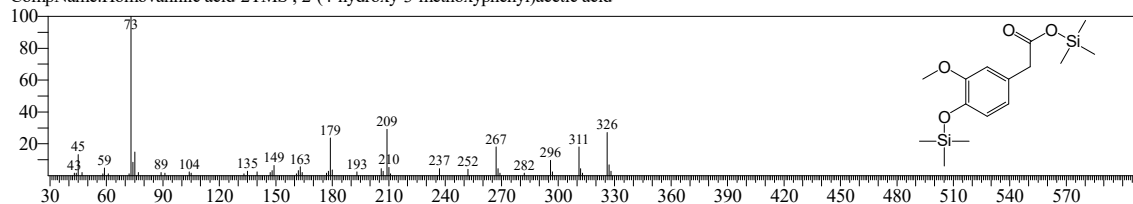

Hit#:5 Entry:310 Library:OA\_TMS\_DB5\_67min\_V3.lib

SI:26 Formula:C11H20N4OSi2 CAS:68-94-0 MolWeight:280 RetIndex:1822

CompName:Hypoxanthine-2TMS ; 3,7-dihydropurin-6-one

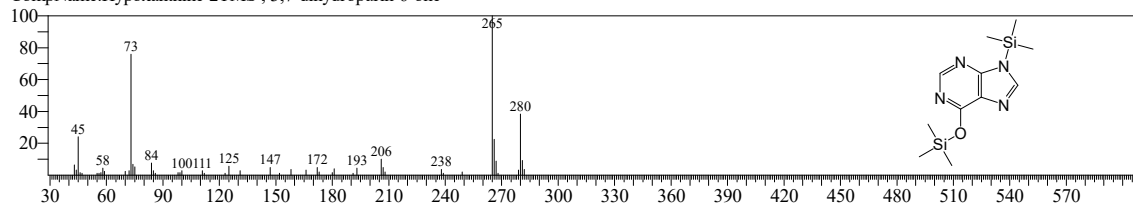

# TNAU

<< Target >>

Line#:10 R.Time:30.950(Scan#:5291) MassPeaks:314

RawMode:Averaged 30.945-30.955(5290-5292) BasePeak:267.05(815)

BG Mode:Calc. from Peak Group 1 - Event 1 Q3 Scan

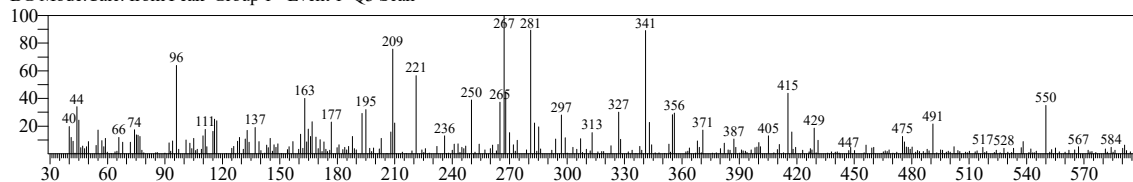

Hit#:1 Entry:341 Library:OA\_TMS\_DB5\_67min\_V3.lib

SI:33 Formula:C<sub>18</sub>H<sub>34</sub>O<sub>4</sub>Si<sub>3</sub> CAS:3247-75-4 MolWeight:398 RetIndex:1864

CompName:3-(3-Hydroxyphenyl)-3-hydroxypropionic acid-3TMS ; 3-hydroxy-3-(3-hydroxyphenyl)propanoic acid

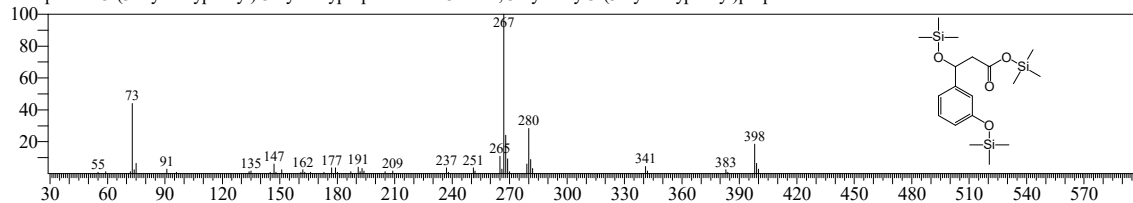

Hit#:2 Entry:315 Library:OA\_TMS\_DB5\_67min\_V3.lib

SI:28 Formula:C<sub>16</sub>H<sub>30</sub>O<sub>4</sub>Si<sub>3</sub> CAS:99-50-3 MolWeight:370 RetIndex:1833

CompName:Protocatechuic acid-3TMS ; 3,4-dihydroxybenzoic acid

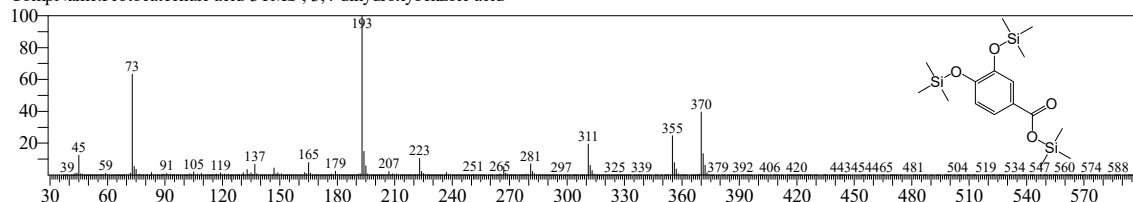

Hit#:3 Entry:179 Library:OA\_TMS\_DB5\_67min\_V3.lib

SI:28 Formula:C<sub>13</sub>H<sub>22</sub>O<sub>3</sub>Si<sub>2</sub> CAS:99-06-9 MolWeight:282 RetIndex:1572

CompName:3-Hydroxybenzoic acid-2TMS ; 3-hydroxybenzoic acid

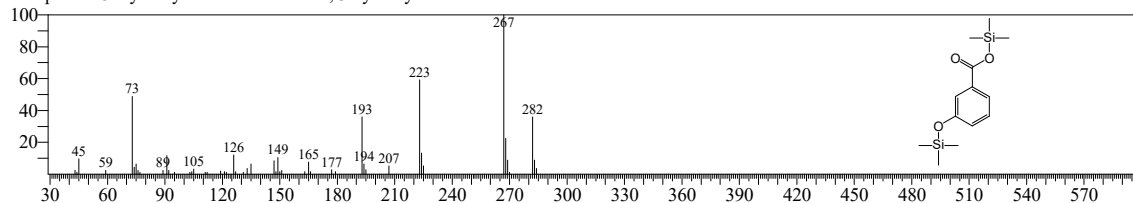

Hit#:4 Entry:402 Library:OA\_TMS\_DB5\_67min\_V3.lib

SI:28 Formula:C<sub>20</sub>H<sub>42</sub>O<sub>4</sub>Si<sub>4</sub> CAS:775-01-9 MolWeight:458 RetIndex:1942

CompName:3,4-Dihydroxymandelic acid-4TMS ; 2-(3,4-dihydroxyphenyl)-2-hydroxyacetic acid

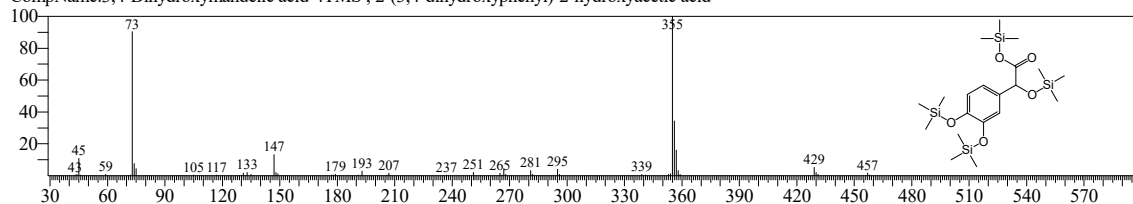

Hit#:5 Entry:211 Library:OA\_TMS\_DB5\_67min\_V3.lib

SI:27 Formula:C<sub>13</sub>H<sub>22</sub>O<sub>3</sub>Si<sub>2</sub> CAS:99-96-7 MolWeight:282 RetIndex:1636

CompName:4-Hydroxybenzoic acid-2TMS ; 4-hydroxybenzoic acid

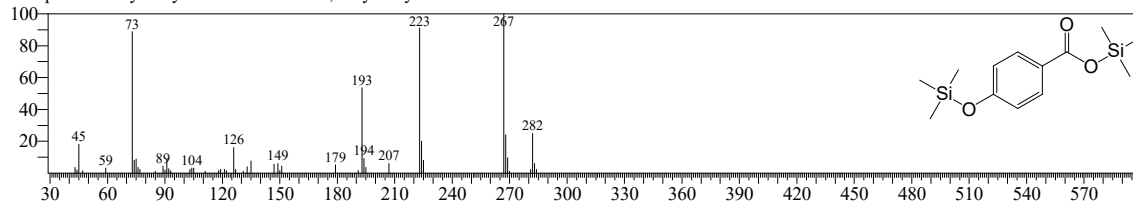

# TNAU

<< Target >>

Line#:11 R.Time:31.240(Scan#:5349) MassPeaks:302

RawMode:Averaged 31.235-31.245(5348-5350) BasePeak:281.05(873)

BG Mode:Calc. from Peak Group 1 - Event 1 Q3 Scan

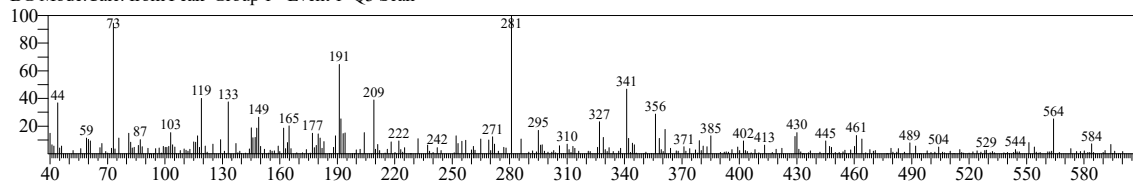

Hit#:1 Entry:345 Library:OA\_TMS\_DB5\_67min\_V3.lib

SI:40 Formula:C<sub>21</sub>H<sub>52</sub>O<sub>6</sub>Si<sub>5</sub> CAS:59-23-4 MolWeight:540 RetIndex:1868

CompName:Galactose-5TMS(2) ; (3R,4S,5R,6R)-6-(hydroxymethyl)oxane-2,3,4,5-tetrol

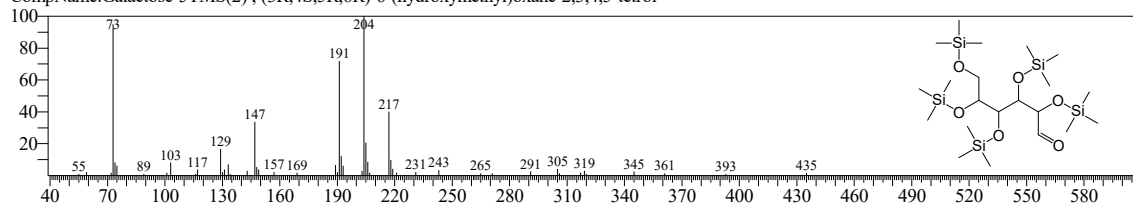

Hit#:2 Entry:349 Library:OA\_TMS\_DB5\_67min\_V3.lib

SI:40 Formula:C<sub>21</sub>H<sub>52</sub>O<sub>6</sub>Si<sub>5</sub> CAS:2595-97-3 MolWeight:540 RetIndex:1874

CompName:Allose-5TMS ; (2R,3R,4R,5R)-2,3,4,5,6-pentahydroxyhexanal

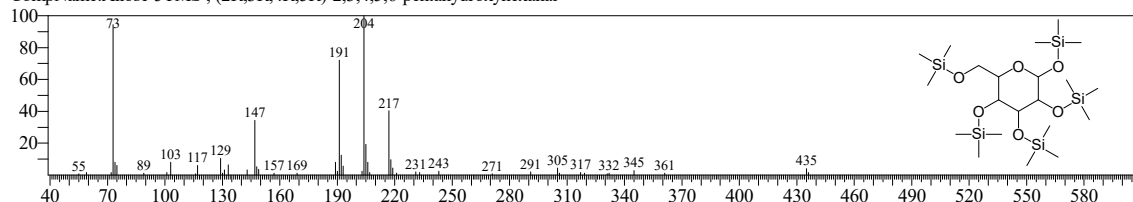

Hit#:3 Entry:437 Library:OA\_TMS\_DB5\_67min\_V3.lib

SI:40 Formula:C<sub>21</sub>H<sub>52</sub>O<sub>6</sub>Si<sub>5</sub> CAS:50-99-7 MolWeight:540 RetIndex:2002

CompName:Glucose-5TMS(2) ; (3R,4S,5S,6R)-6-(hydroxymethyl)oxane-2,3,4,5-tetrol

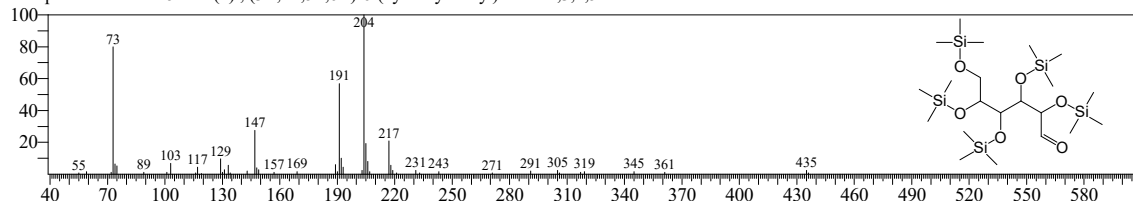

Hit#:4 Entry:348 Library:OA\_TMS\_DB5\_67min\_V3.lib

SI:39 Formula:C<sub>21</sub>H<sub>52</sub>O<sub>6</sub>Si<sub>5</sub> CAS:3458-28-4 MolWeight:540 RetIndex:1872

CompName:Mannose-5TMS(2) ; (3S,4S,5S,6R)-6-(hydroxymethyl)oxane-2,3,4,5-tetrol

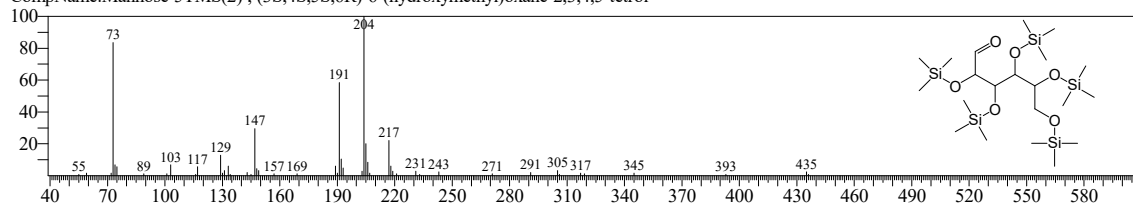

Hit#:5 Entry:9 Library:OA\_TMS\_DB5\_67min\_V3.lib

SI:39 Formula: CAS:0-00-0 MolWeight:237 RetIndex:1062

CompName:Lactic acid-13C3-2TMS ;

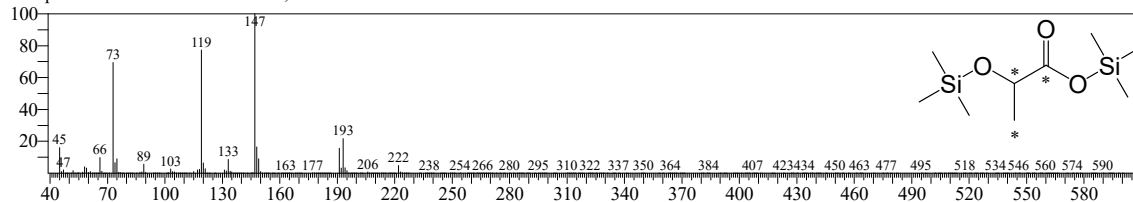

# TNAU

<< Target >>

Line#:12 R.Time:31.780(Scan#:5457) MassPeaks:282

RawMode:Averaged 31.775-31.785(5456-5458) BasePeak:281.00(1003)

BG Mode:Calc. from Peak Group 1 - Event 1 Q3 Scan

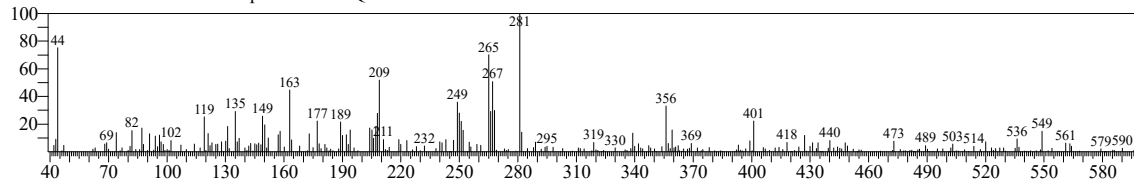

Hit#:1 Entry:203 Library:OA TMS DB5\_67min\_V3.lib

SI:34 Formula:C13H23NO2Si2 CAS:118-92-3 MolWeight:281 RetIndex:1623

CompName:Anthranilic acid-2TMS ; 2-aminobenzoic acid

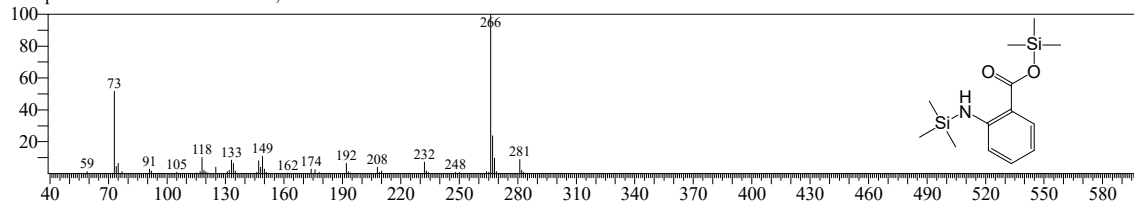

Hit#:2 Entry:310 Library:OA TMS DB5\_67min\_V3.lib

SI:33 Formula:C11H20N4OSi2 CAS:68-94-0 MolWeight:280 RetIndex:1822

CompName:Hypoxanthine-2TMS ; 3,7-dihydropurin-6-one

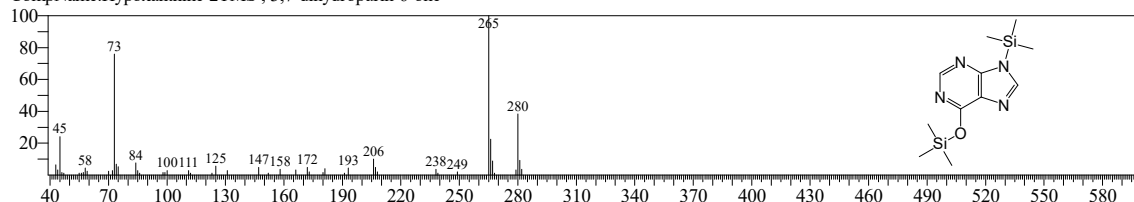

Hit#:3 Entry:341 Library:OA TMS DB5\_67min\_V3.lib

SI:33 Formula:C18H34O4Si3 CAS:3247-75-4 MolWeight:398 RetIndex:1864

CompName:3-(3-Hydroxyphenyl)-3-hydroxypropionic acid-3TMS ; 3-hydroxy-3-(3-hydroxyphenyl)propanoic acid

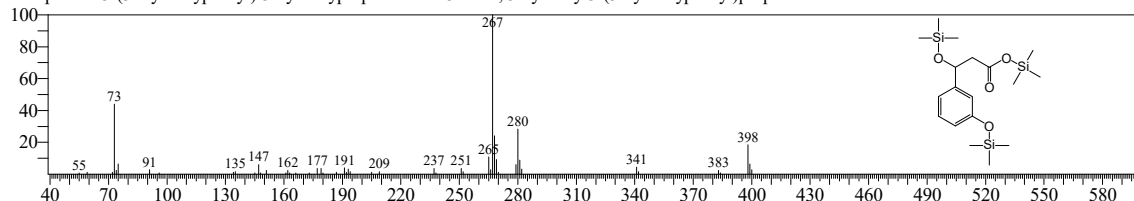

Hit#:4 Entry:179 Library:OA TMS DB5\_67min\_V3.lib

SI:29 Formula:C13H22O3Si2 CAS:99-06-9 MolWeight:282 RetIndex:1572

CompName:3-Hydroxybenzoic acid-2TMS ; 3-hydroxybenzoic acid

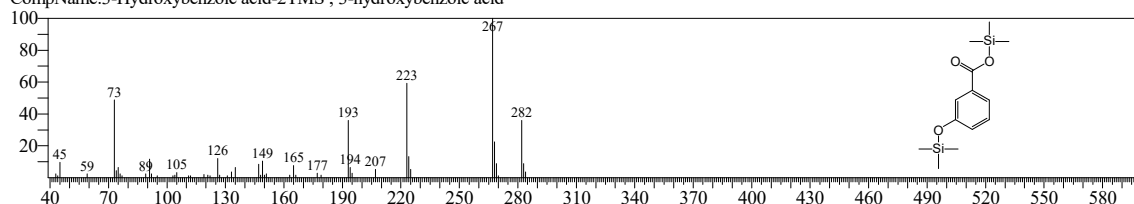

Hit#:5 Entry:211 Library:OA TMS DB5\_67min\_V3.lib

SI:28 Formula:C13H22O3Si2 CAS:99-96-7 MolWeight:282 RetIndex:1636

CompName:4-Hydroxybenzoic acid-2TMS ; 4-hydroxybenzoic acid

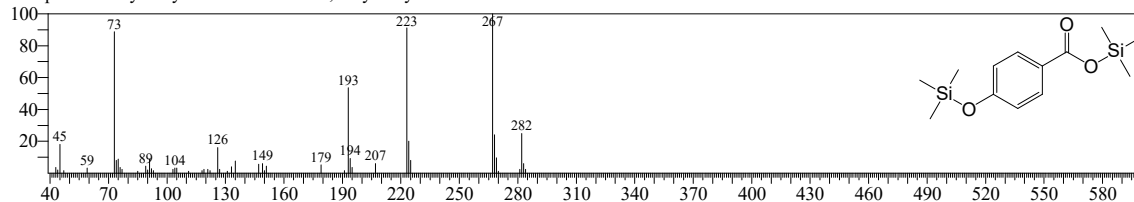

# TNAU

<< Target >>

Line#:13 R.Time:31.890(Scan#:5479) MassPeaks:343

RawMode:Averaged 31.885-31.895(5478-5480) BasePeak:139.15(1685)

BG Mode:Calc. from Peak Group 1 - Event 1 Q3 Scan

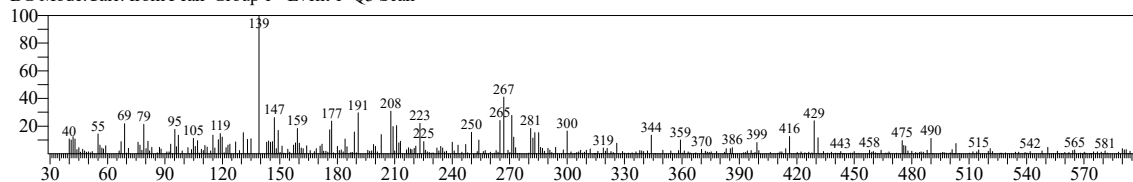

Hit#:1 Entry:33 Library:FA\_ME\_SP2560\_EI\_V3.lib

SI:28 Formula:C21H34O2 CAS:506-32-1 MolWeight:318 RetIndex:3109

CompName:Methyl arachidonate ; (5Z,8Z,11Z,14Z)-icosa-5,8,11,14-tetraenoic acid

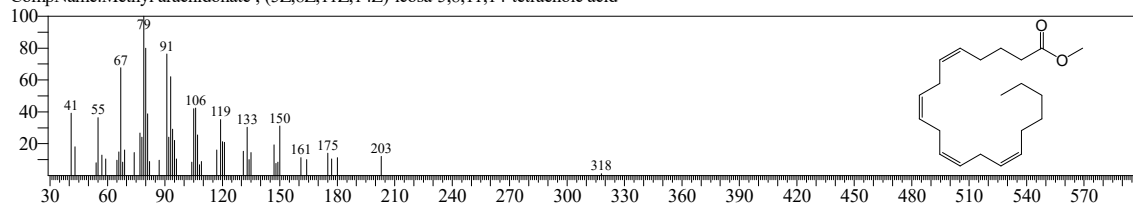

Hit#:2 Entry:179 Library:OA\_TMS\_DB5\_67min\_V3.lib

SI:27 Formula:C13H22O3Si2 CAS:99-06-9 MolWeight:282 RetIndex:1572

CompName:3-Hydroxybenzoic acid-2TMS ; 3-hydroxybenzoic acid

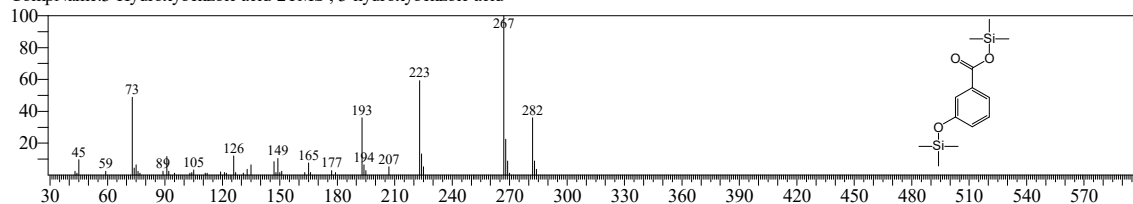

Hit#:3 Entry:534 Library:OA\_TMS\_DB5\_67min\_V3.lib

SI:27 Formula:C25H42O2Si CAS:24880-45-3 MolWeight:402 RetIndex:2591

CompName:Docosapentaenoic acid-TMS ; (7Z,10Z,13Z,16Z,19Z)-docosa-7,10,13,16,19-pentaenoic acid

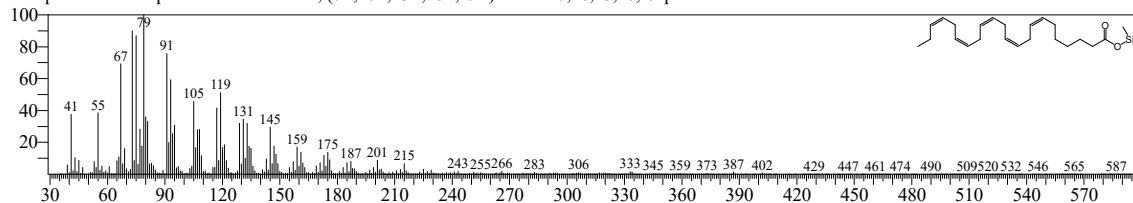

Hit#:4 Entry:38 Library:FA\_ME\_SP2560\_EI\_V3.lib

SI:26 Formula:C23H34O2 CAS:6217-54-5 MolWeight:342 RetIndex:3514

CompName:Methyl cis-4,7,10,13,16,19-Docosahexaenoate ; Docosa-4,7,10,13,16,19-hexaenoic acid

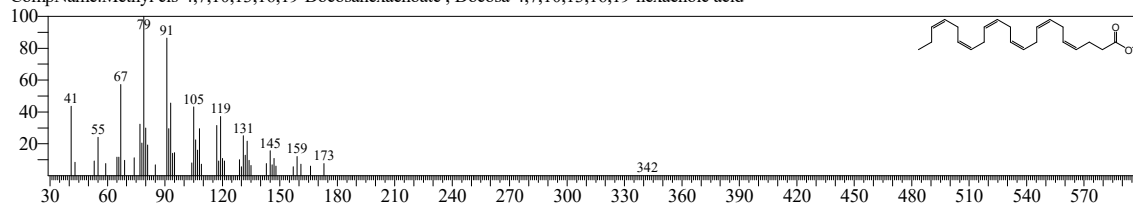

Hit#:5 Entry:36 Library:FA\_ME\_SP2560\_EI\_V3.lib

SI:26 Formula:C21H32O2 CAS:10417-94-4 MolWeight:316 RetIndex:3232

CompName:Methyl cis-5,8,11,14,17-Eicosapentaenoate ; Icosa-5,8,11,14,17-pentaenoic acid

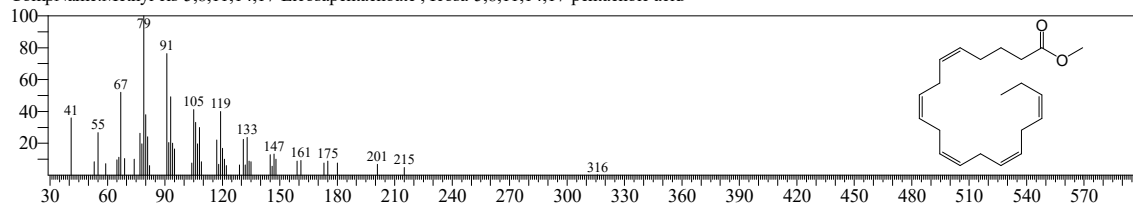

# TNAU

<< Target >>

Line#:14 R.Time:32.445(Scan#:5590) MassPeaks:301

RawMode:Averaged 32.440-32.450(5589-5591) BasePeak:281.00(1327)

BG Mode:Calc. from Peak Group 1 - Event 1 Q3 Scan

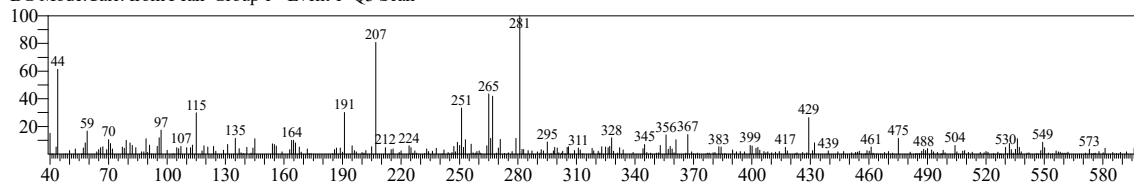

Hit#:1 Entry:310 Library:OA TMS DB5 67min V3.lib

SI:32 Formula:C11H20N4OSi2 CAS:68-94-0 MolWeight:280 RetIndex:1822

CompName:Hypoxanthine-2TMS ; 3,7-dihdropurin-6-one

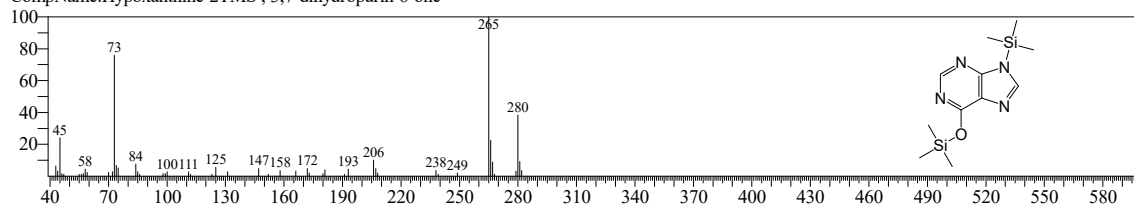

Hit#:2 Entry:341 Library:OA TMS DB5 67min V3.lib

SI:29 Formula:C18H34O4Si3 CAS:3247-75-4 MolWeight:398 RetIndex:1864

CompName:3-(3-Hydroxyphenyl)-3-hydroxypropionic acid-3TMS ; 3-hydroxy-3-(3-hydroxyphenyl)propanoic acid

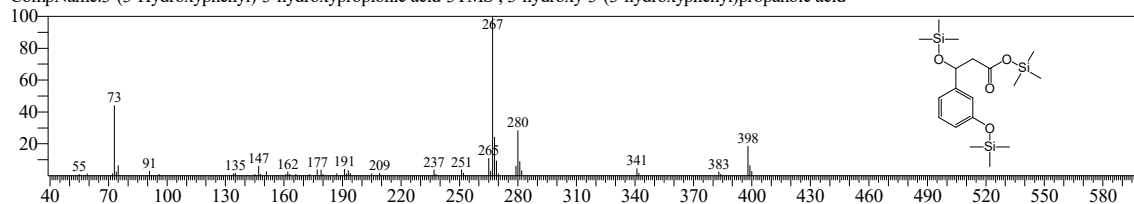

Hit#:3 Entry:211 Library:OA TMS DB5 67min V3.lib

SI:23 Formula:C13H22O3Si2 CAS:99-96-7 MolWeight:282 RetIndex:1636

CompName:4-Hydroxybenzoic acid-2TMS ; 4-hydroxybenzoic acid

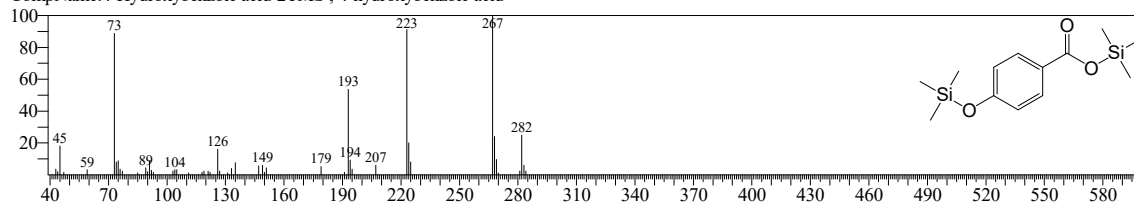

Hit#:4 Entry:203 Library:OA TMS DB5 67min V3.lib

SI:22 Formula:C13H23NO2Si2 CAS:118-92-3 MolWeight:281 RetIndex:1623

CompName:Anthranilic acid-2TMS ; 2-aminobenzoic acid

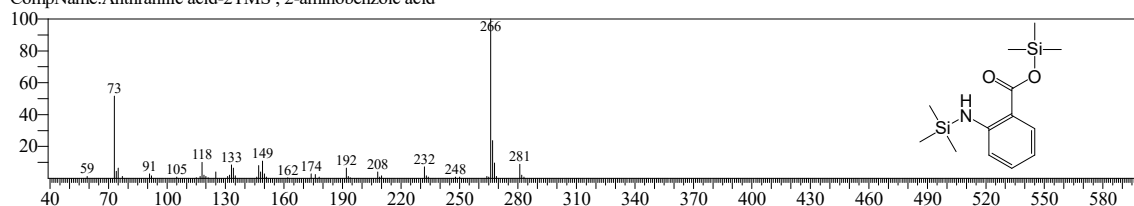

Hit#:5 Entry:179 Library:OA TMS DB5 67min V3.lib

SI:21 Formula:C13H22O3Si2 CAS:99-06-9 MolWeight:282 RetIndex:1572

CompName:3-Hydroxybenzoic acid-2TMS ; 3-hydroxybenzoic acid

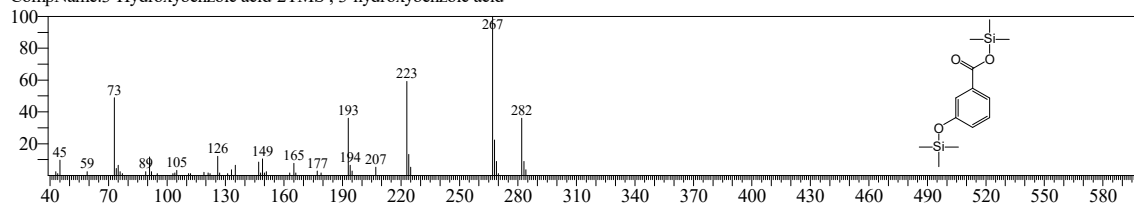

Supplement: Supplementary file 65 [file supplementary]
