# Supplementary material for: Comparative Metabolomics Profiling Reveals Key Metabolites and Associated Pathways Regulating Tuber Dormancy in White Yam (<em>Dioscorea rotundata</em>)
Source: Preprints.org preprint supplement (doi:10.20944/preprints202303.0378.v1), 2023-03-21

# TNAU

## Sample Information

Analyzed by : Admin  
 Analyzed : 05-Aug-22 11:05:27 AM  
 Sample Type : Unknown  
 Level # : 1  
 Sample Name : T87-2  
 Sample ID : T87-2  
 IS Amount : [1]=1  
 Sample Amount : 1  
 Dilution Factor : 1  
 Vial # : 28  
 Injection Volume : 1.00  
 Data File : D:\GCMS-8040NX\Aug 2022\Users\04.08.2022\Data files\04082022-029.qgd  
 Org Data File : D:\GCMS-8040NX\Aug 2022\Users\04.08.2022\Data files\04082022-029.qgd  
 Method File : D:\GCMS-8040NX\Aug 2022\Users\04.08.2022\Method file\27072022\_methodfile.qgm  
 Org Method File : D:\GCMS-8040NX\Aug 2022\Users\04.08.2022\Method file\27072022\_methodfile.qgm  
 Report File :  
 Tuning File : D:\GCMS-8040NX\Aug 2022\Tuning Data\TUNING 04082022.qgt  
 [Comment]  
 Jerry samples  
 Modified by : Admin  
 Modified : 05-Aug-22 4:45:51 PM

Chromatogram T87-2 D:\GCMS-8040NX\Aug 2022\Users\04.08.2022\Data files\04082022-029.qgd

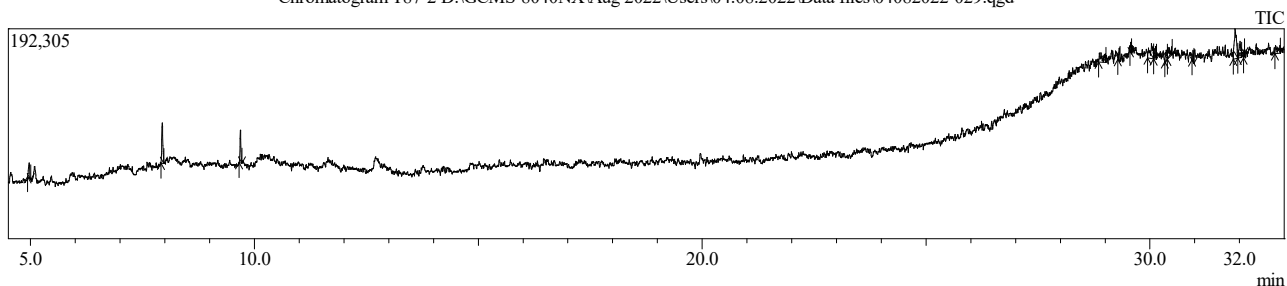

Peak Report TIC

| Peak# | R.Time | Area   | Area%  | Height | Height% | A/H  | Similarity | Name                            |
|-------|--------|--------|--------|--------|---------|------|------------|---------------------------------|
| 1     | 4.969  | 23743  | 4.72   | 14114  | 6.46    | 1.68 | 74         | 2-Propanol, 1,1'-oxybis-        |
| 2     | 7.940  | 62547  | 12.43  | 37011  | 16.95   | 1.69 | 91         | Undecane                        |
| 3     | 9.688  | 42271  | 8.40   | 29843  | 13.67   | 1.42 | 89         | Undecane                        |
| 4     | 28.907 | 41795  | 8.31   | 8484   | 3.89    | 4.93 | 23         | 3,4-Dihydroxymandelic acid-4TMS |
| 5     | 29.313 | 15624  | 3.11   | 11400  | 5.22    | 1.37 | 33         | 3,4-Dihydroxymandelic acid-4TMS |
| 6     | 29.573 | 9603   | 1.91   | 9129   | 4.18    | 1.05 | 37         | Lyxose-4TMS(2)                  |
| 7     | 30.035 | 58294  | 11.59  | 13708  | 6.28    | 4.25 | 26         | Hippuric acid-TMS               |
| 8     | 30.127 | 21860  | 4.35   | 11470  | 5.25    | 1.91 | 26         | Hypoxanthine-2TMS               |
| 9     | 30.360 | 20246  | 4.02   | 9535   | 4.37    | 2.12 | 40         | Ribose-4TMS(4)                  |
| 10    | 30.480 | 30074  | 5.98   | 7760   | 3.55    | 3.88 | 25         | 2-Deoxy-glucose-4TMS(1)         |
| 11    | 30.964 | 12153  | 2.42   | 10778  | 4.94    | 1.13 | 30         | 4-Hydroxybenzoic acid-2TMS      |
| 12    | 31.902 | 90756  | 18.04  | 27345  | 12.52   | 3.32 | 32         | Urocanic acid-2TMS              |
| 13    | 32.015 | 40892  | 8.13   | 14982  | 6.86    | 2.73 | 33         | Hypoxanthine-2TMS               |
| 14    | 32.100 | 3762   | 0.75   | 5277   | 2.42    | 0.71 | 32         | 3,4-Dihydroxymandelic acid-4TMS |
| 15    | 32.805 | 29406  | 5.85   | 7509   | 3.44    | 3.92 | 47         | 4-Hydroxybenzoic acid-2TMS      |
|       |        | 503026 | 100.00 | 218345 | 100.00  |      |            |                                 |

Library

# TNAU

<< Target >>

Line#:1 R.Time:4.970(Scan#:95) MassPeaks:344

RawMode:Averaged 4.965-4.975(94-96) BasePeak:89.15(2593)

BG Mode:Calc. from Peak Group 1 - Event 1 Q3 Scan

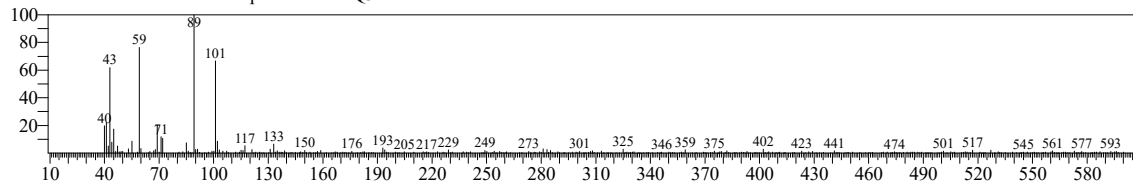

Hit#:1 Entry:7425 Library:NIST20R.lib

SI:74 Formula:C6H14O3 CAS:110-98-5 MolWeight:134 RetIndex:1018

CompName:2-Propanol, 1,1'-oxybis- \$2-Propanol, 1,1'-oxydi- \$Bis(2-hydroxypropyl) ether \$1,1'-Oxydi-2-propanol \$2,2'-Dihydroxydipropyl ether \$

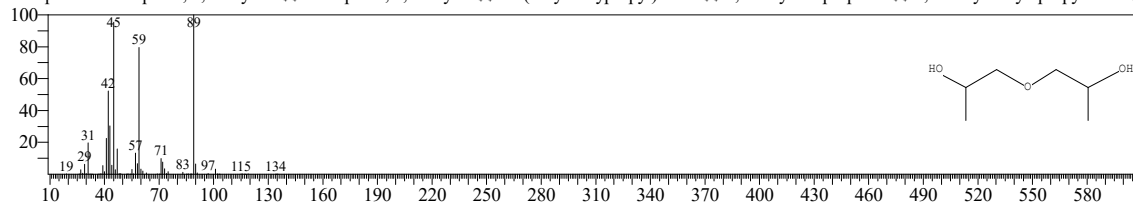

Hit#:2 Entry:22897 Library:NIST20M1.lib

SI:74 Formula:C8H16O3 CAS:0-00-0 MolWeight:160 RetIndex:931

CompName:2-Hydroxyisocaproic acid, methyl ether, methyl ester

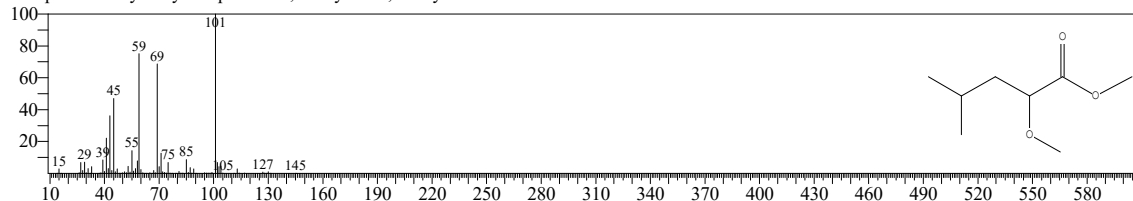

Hit#:3 Entry:23889 Library:NIST20M1.lib

SI:71 Formula:C7H14O2S CAS:0-00-0 MolWeight:162 RetIndex:1135

CompName:Methyl 4-(ethylthio)butanoate \$Methyl 4-(ethylsulfanyl)butanoate #

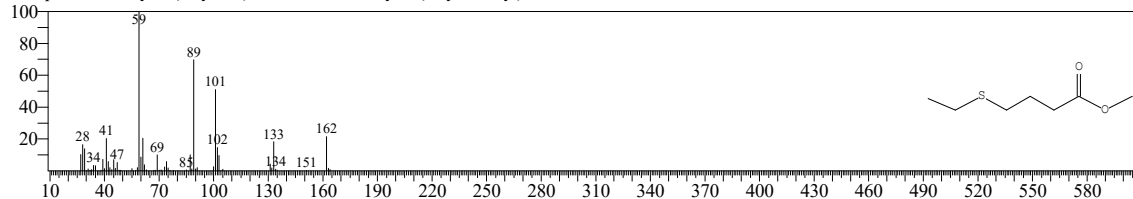

Hit#:4 Entry:9217 Library:NIST20M1.lib

SI:70 Formula:C6H12O3 CAS:0-00-0 MolWeight:132 RetIndex:964

CompName:Ethylene glycol isobutyrate

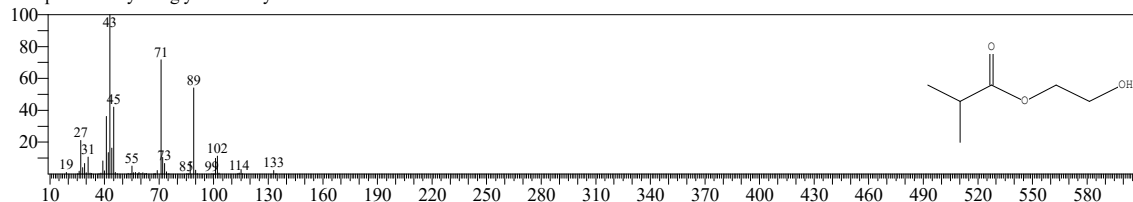

Hit#:5 Entry:43056 Library:NIST20M1.lib

SI:70 Formula:C11H24O2 CAS:0-00-0 MolWeight:188 RetIndex:1074

CompName:Propanal isopentyl isopropyl acetal \$Propanal isoamyl isopropyl acetal

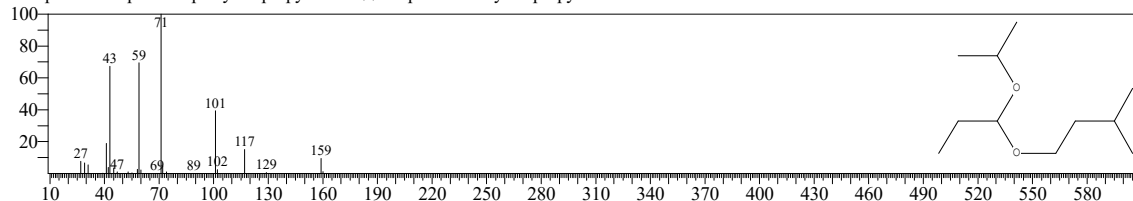

# TNAU

<< Target >>

Line# 2 R.Time: 7.940 (Scan#: 689) MassPeaks: 240

RawMode: Averaged 7.935-7.945 (688-690) BasePeak: 57.10 (8801)

BG Mode: Calc. from Peak Group 1 - Event 1 Q3 Scan

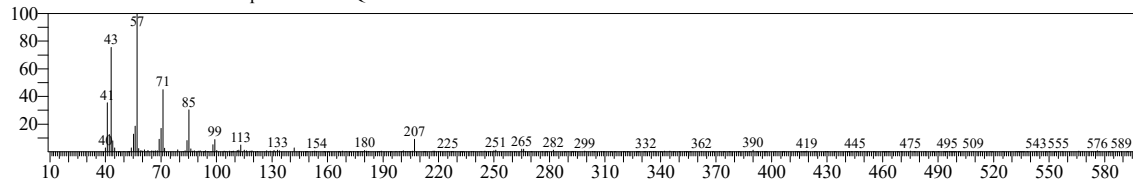

Hit#: 1 Entry: 21042 Library: NIST20M1.lib

SI: 91 Formula: C<sub>11</sub>H<sub>24</sub> CAS: 1120-21-4 MolWeight: 156 RetIndex: 1100

CompName: Undecane \$\$ n-Undecane \$\$ Hendecane \$\$ n-C<sub>11</sub>H<sub>24</sub> \$\$ UN 2330

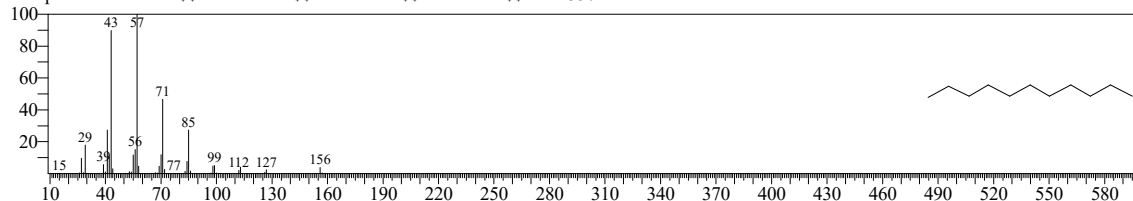

Hit#: 2 Entry: 30057 Library: NIST20M1.lib

SI: 91 Formula: C<sub>12</sub>H<sub>26</sub> CAS: 112-40-3 MolWeight: 170 RetIndex: 1200

CompName: Dodecane \$\$ n-Dodecane \$\$ Adakane 12 \$\$ Ba 51-090453 \$\$ CH<sub>3</sub>(CH<sub>2</sub>)<sub>10</sub>CH<sub>3</sub> \$\$ Bihexyl \$\$ Dihexyl \$\$ Duodecane \$\$ NSC 8714

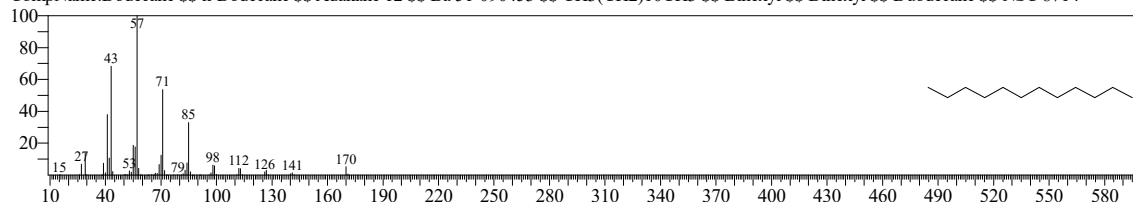

Hit#: 3 Entry: 40226 Library: NIST20M1.lib

SI: 90 Formula: C<sub>13</sub>H<sub>28</sub> CAS: 629-50-5 MolWeight: 184 RetIndex: 1300

CompName: Tridecane \$\$ n-Tridecane \$\$ Tridecane, n-

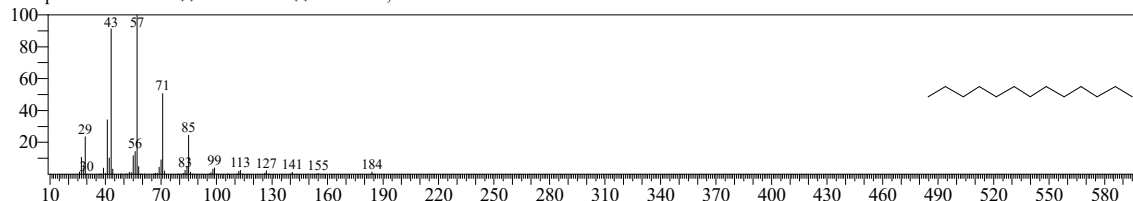

Hit#: 4 Entry: 13604 Library: NIST20M1.lib

SI: 90 Formula: C<sub>10</sub>H<sub>22</sub> CAS: 124-18-5 MolWeight: 142 RetIndex: 1000

CompName: Decane \$\$ n-Decane \$\$ n-C<sub>10</sub>H<sub>22</sub> \$\$ UN 2247

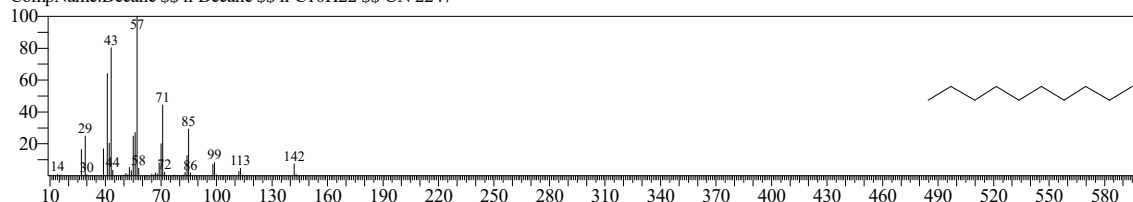

Hit#: 5 Entry: 13631 Library: NIST20M1.lib

SI: 90 Formula: C<sub>10</sub>H<sub>22</sub> CAS: 15869-93-9 MolWeight: 142 RetIndex: 887

CompName: Octane, 3,5-dimethyl- \$\$ 3,5-Dimethyloctane

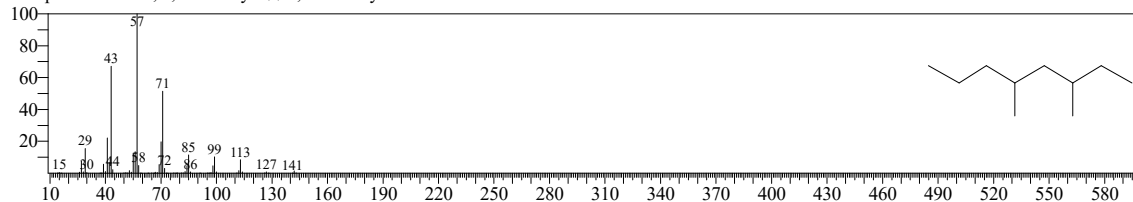

# TNAU

<< Target >>

Line# 3 R.Time: 9.690 (Scan#: 1039) MassPeaks: 274

RawMode: Averaged 9.685-9.695 (1038-1040) BasePeak: 57.10 (5753)

BG Mode: Calc. from Peak Group 1 - Event 1 Q3 Scan

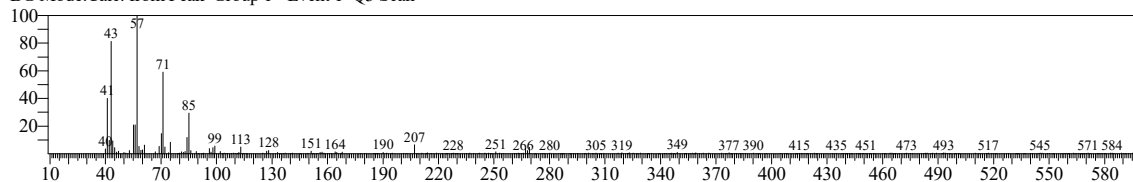

Hit#: 1 Entry: 12897 Library: NIST20R.lib

SI: 89 Formula: C<sub>11</sub>H<sub>24</sub> CAS: 1120-21-4 MolWeight: 156 RetIndex: 1100

CompName: Undecane \$\$ n-Undecane \$\$ Hendecane \$\$ n-C<sub>11</sub>H<sub>24</sub> \$\$ UN 2330

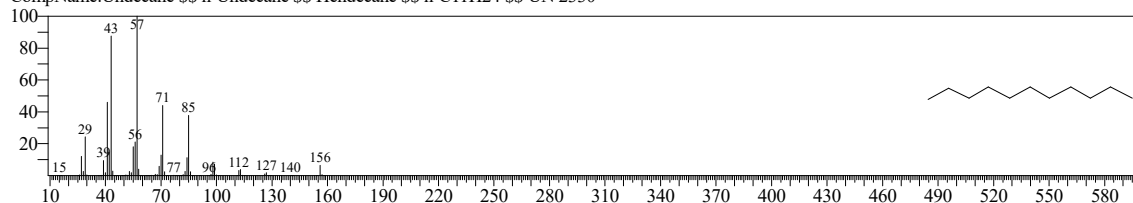

Hit#: 2 Entry: 27736 Library: NIST20R.lib

SI: 89 Formula: C<sub>16</sub>H<sub>34</sub> CAS: 544-76-3 MolWeight: 226 RetIndex: 1600

CompName: Hexadecane \$\$ n-Cetane \$\$ n-Hexadecane \$\$ Cetane

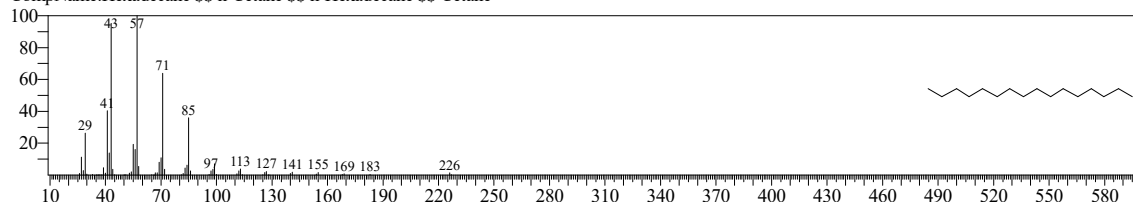

Hit#: 3 Entry: 16191 Library: NIST20R.lib

SI: 89 Formula: C<sub>12</sub>H<sub>26</sub> CAS: 112-40-3 MolWeight: 170 RetIndex: 1200

CompName: Dodecane \$\$ n-Dodecane \$\$ Adakane 12 \$\$ Ba 51-090453 \$\$ CH<sub>3</sub>(CH<sub>2</sub>)<sub>10</sub>CH<sub>3</sub> \$\$ Bihexyl \$\$ Dihexyl \$\$ Duodecane \$\$ NSC 8714

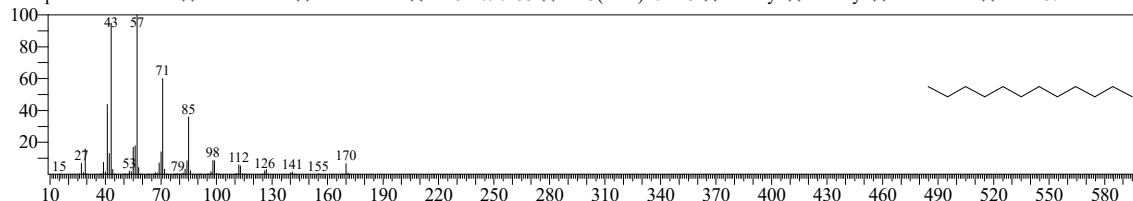

Hit#: 4 Entry: 19410 Library: NIST20R.lib

SI: 88 Formula: C<sub>13</sub>H<sub>28</sub> CAS: 629-50-5 MolWeight: 184 RetIndex: 1300

CompName: Tridecane \$\$ n-Tridecane \$\$ Tridecane, n-

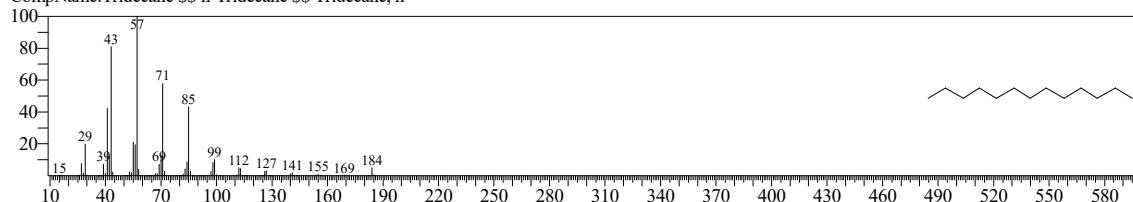

Hit#: 5 Entry: 159057 Library: NIST20M1.lib

SI: 88 Formula: C<sub>21</sub>H<sub>44</sub> CAS: 18344-37-1 MolWeight: 296 RetIndex: 1852

CompName: Heptadecane, 2,6,10,14-tetramethyl- \$\$ 2,6,10,14-Tetramethylheptadecane

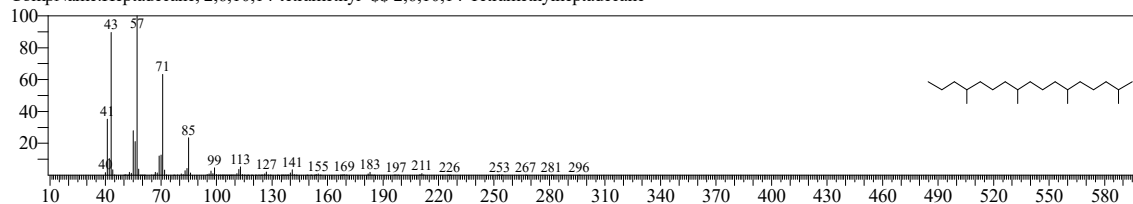

# TNAU

<< Target >>

Line#:4 R.Time:28.905(Scan#:4882) MassPeaks:330

RawMode:Averaged 28.900-28.910(4881-4883) BasePeak:209.00(658)

BG Mode:Calc. from Peak Group 1 - Event 1 Q3 Scan

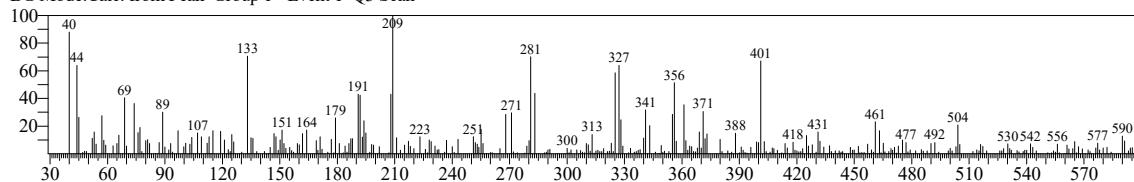

Hit#:1 Entry:402 Library:OA\_TMS\_DB5\_67min\_V3.lib

SI:23 Formula:C20H42O4Si4 CAS:775-01-9 MolWeight:458 RetIndex:1942

CompName:3,4-Dihydroxymandelic acid-4TMS ; 2-(3,4-dihydroxyphenyl)-2-hydroxyacetic acid

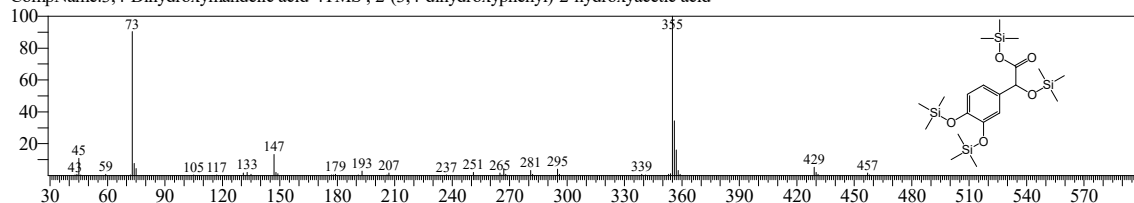

Hit#:2 Entry:142 Library:OA\_TMS\_DB5\_67min\_V3.lib

SI:22 Formula:C10H15NO2Si CAS:118-92-3 MolWeight:209 RetIndex:1495

CompName:Anthranilic acid-TMS ; 2-aminobenzoic acid

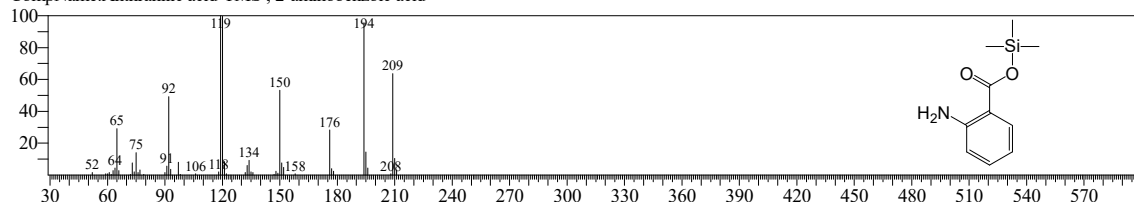

Hit#:3 Entry:477 Library:OA\_TMS\_DB5\_67min\_V3.lib

SI:22 Formula:C21H46OSi CAS:112-92-5 MolWeight:342 RetIndex:2156

CompName:Octadecanol-TMS ; octadecan-1-ol

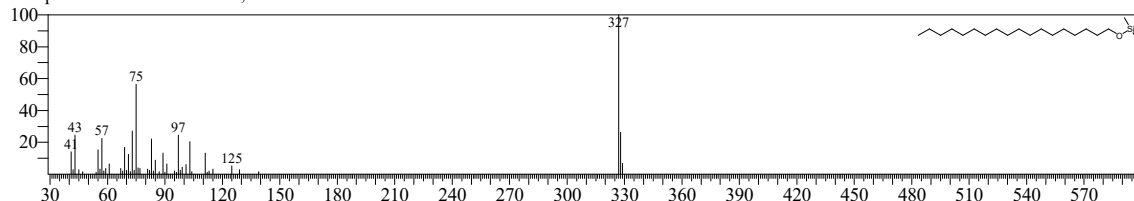

Hit#:4 Entry:382 Library:OA\_TMS\_DB5\_67min\_V3.lib

SI:21 Formula:C18H34O4Si3 CAS:6482-98-0 MolWeight:398 RetIndex:1918

CompName:4-Hydroxyphenyllactic acid-3TMS ; 2-hydroxy-3-(4-hydroxyphenyl)propanoate

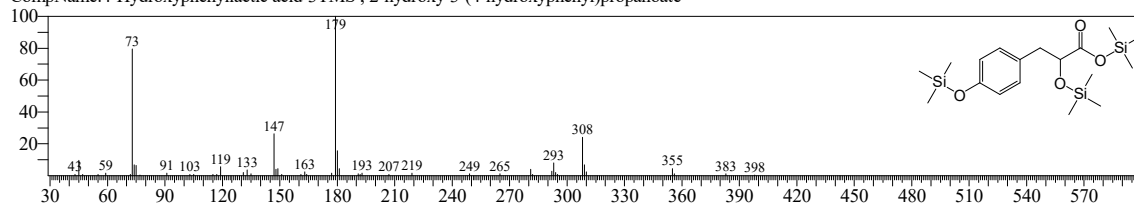

Hit#:5 Entry:138 Library:OA\_TMS\_DB5\_67min\_V3.lib

SI:20 Formula:C14H24O3Si2 CAS:90-64-2 MolWeight:296 RetIndex:1486

CompName:Mandelic acid-2TMS ; 2-hydroxy-2-phenylacetic acid

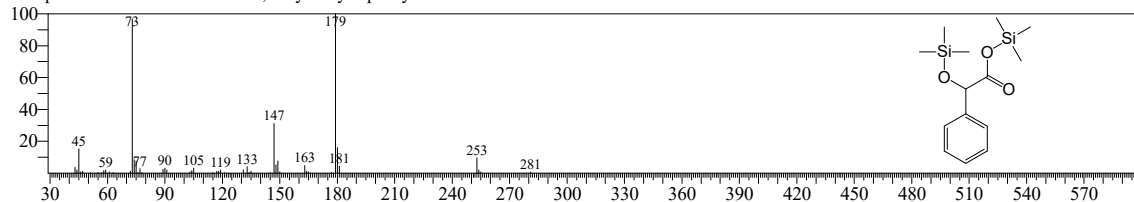

# TNAU

<< Target >>

Line#:5 R.Time:29.315(Scan#:4964) MassPeaks:342

RawMode:Averaged 29.310-29.320(4963-4965) BasePeak:207.05(1341)

BG Mode:Calc. from Peak Group 1 - Event 1 Q3 Scan

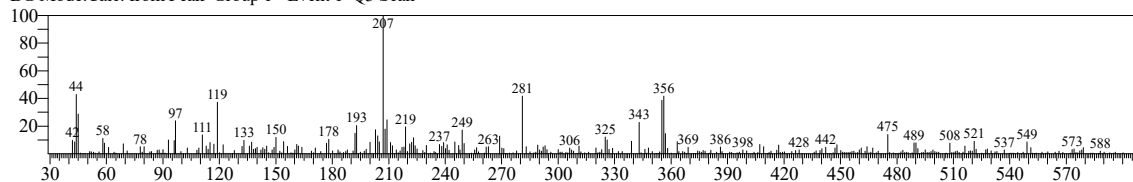

Hit#:1 Entry:402 Library:OA\_TMS\_DB5\_67min\_V3.lib

SI:33 Formula:C20H42O4Si4 CAS:775-01-9 MolWeight:458 RetIndex:1942

CompName:3,4-Dihydroxymandelic acid-4TMS ; 2-(3,4-dihydroxyphenyl)-2-hydroxyacetic acid

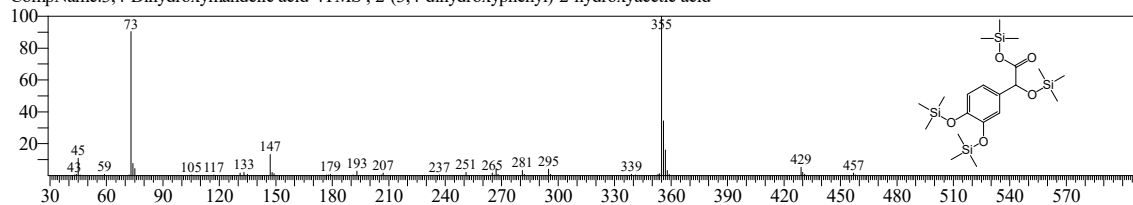

Hit#:2 Entry:315 Library:OA\_TMS\_DB5\_67min\_V3.lib

SI:32 Formula:C16H30O4Si3 CAS:99-50-3 MolWeight:370 RetIndex:1833

CompName:Protocatechuic acid-3TMS ; 3,4-dihydroxybenzoic acid

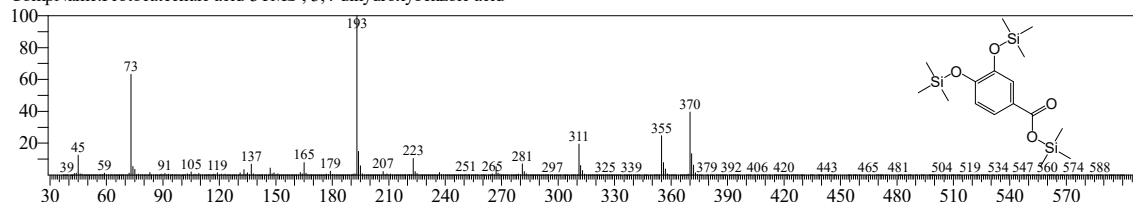

Hit#:3 Entry:308 Library:OA\_TMS\_DB5\_67min\_V3.lib

SI:22 Formula:C19H42O5Si4 CAS:138-59-0 MolWeight:462 RetIndex:1819

CompName:Shikimic acid-4TMS ; 3,4,5-trihydroxycyclohexene-1-carboxylic acid

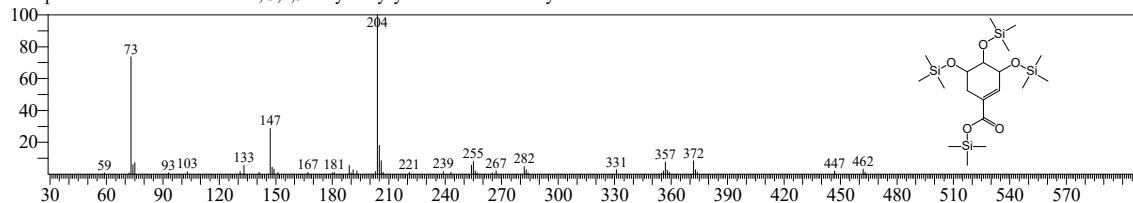

Hit#:4 Entry:539 Library:OA\_TMS\_DB5\_67min\_V3.lib

SI:21 Formula:C27H60O3Si2 CAS:544-62-7 MolWeight:488 RetIndex:2684

CompName:Batyl alcohol-2TMS ; 3-octadecoxypropane-1,2-diol

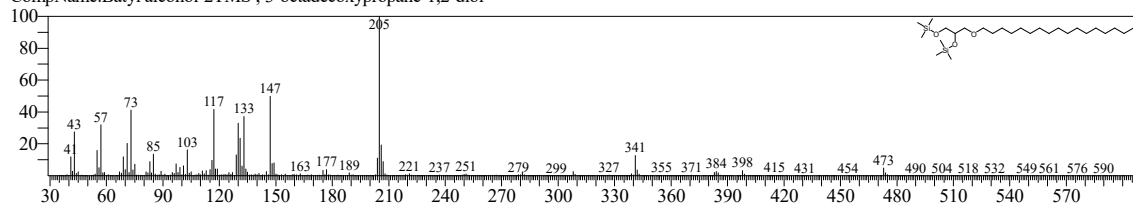

Hit#:5 Entry:104 Library:OA\_TMS\_DB5\_67min\_V3.lib

SI:21 Formula:C12H31NO3Si3 CAS:56-45-1 MolWeight:321 RetIndex:1367

CompName:Serine-3TMS ; (2S)-2-amino-3-hydroxypropanoic acid

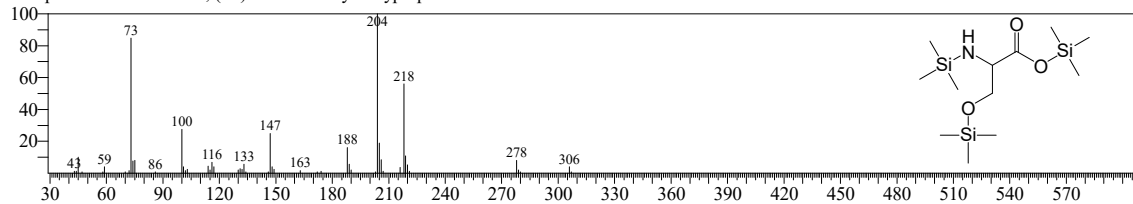

# TNAU

<< Target >>

Line#:6 R.Time:29.575(Scan#:5016) MassPeaks:268

RawMode:Averaged 29.570-29.580(5015-5017) BasePeak:207.05(2087)

BG Mode:Calc. from Peak Group 1 - Event 1 Q3 Scan

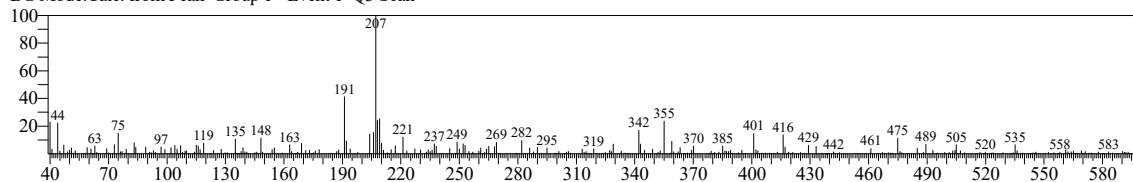

Hit#:1 Entry:238 Library:OA\_TMS\_DB5\_67min\_V3.lib

SI:37 Formula:C<sub>17</sub>H<sub>42</sub>O<sub>5</sub>Si<sub>4</sub> CAS:1114-34-7 MolWeight:438 RetIndex:1675

CompName:Lyxose-4TMS(2) ; (2S,3S,4R)-2,3,4,5-tetrahydroxypentanal

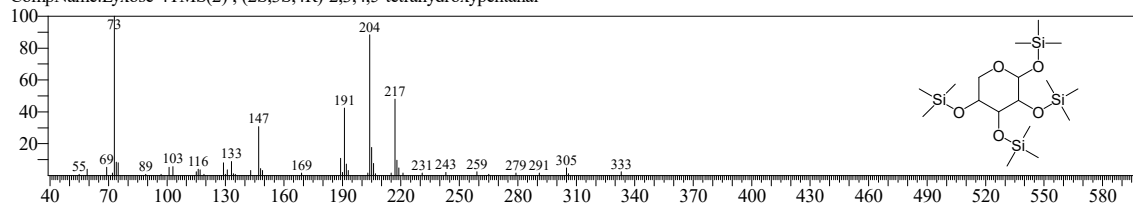

Hit#:2 Entry:232 Library:OA\_TMS\_DB5\_67min\_V3.lib

SI:36 Formula:C<sub>17</sub>H<sub>42</sub>O<sub>5</sub>Si<sub>4</sub> CAS:10323-20-3 MolWeight:438 RetIndex:1667

CompName:Arabinose-4TMS(2) ; (2S,3R,4R)-2,3,4,5-tetrahydroxypentanal

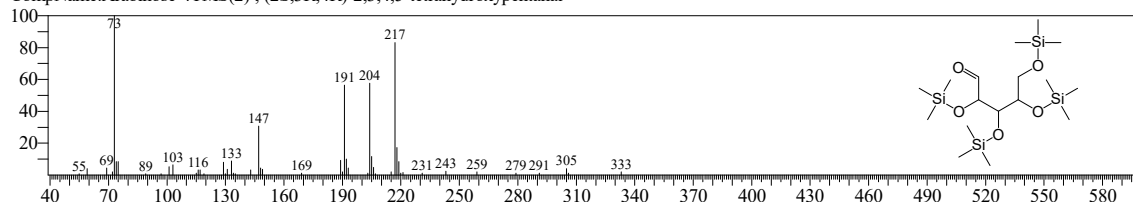

Hit#:3 Entry:295 Library:OA\_TMS\_DB5\_67min\_V3.lib

SI:36 Formula:C<sub>17</sub>H<sub>42</sub>O<sub>5</sub>Si<sub>4</sub> CAS:58-86-6 MolWeight:438 RetIndex:1784

CompName:Xylose-4TMS(2) ; (2R,3S,4R)-2,3,4,5-tetrahydroxypentanal

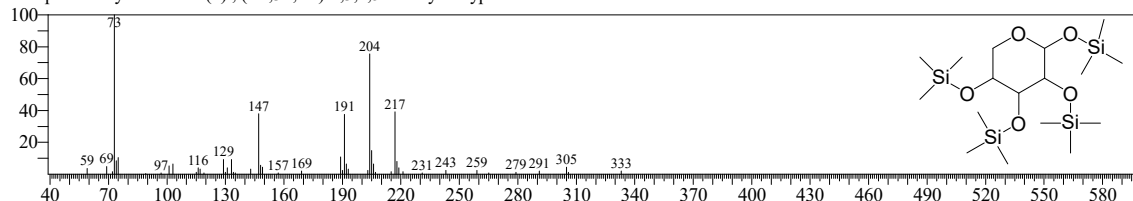

Hit#:4 Entry:261 Library:OA\_TMS\_DB5\_67min\_V3.lib

SI:36 Formula:C<sub>18</sub>H<sub>44</sub>O<sub>5</sub>Si<sub>4</sub> CAS:10485-94-6 MolWeight:452 RetIndex:1719

CompName:Rhamnose-4TMS(2) ; (2R,3R,4S,5S)-2,3,4,5-tetrahydroxyhexanal

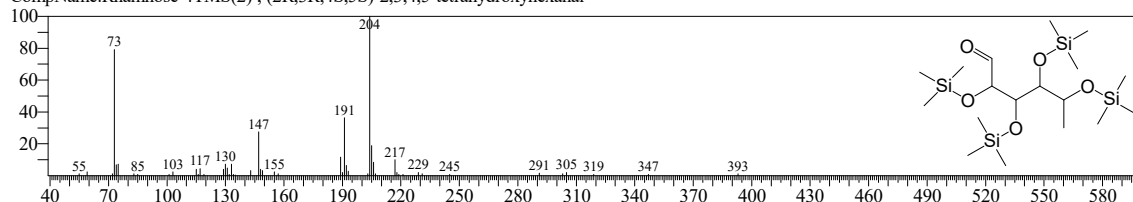

Hit#:5 Entry:250 Library:OA\_TMS\_DB5\_67min\_V3.lib

SI:36 Formula:C<sub>17</sub>H<sub>42</sub>O<sub>5</sub>Si<sub>4</sub> CAS:50-69-1 MolWeight:438 RetIndex:1691

CompName:Ribose-4TMS(4) ; (3R,4S,5R)-5-(hydroxymethyl)oxolane-2,3,4-triol

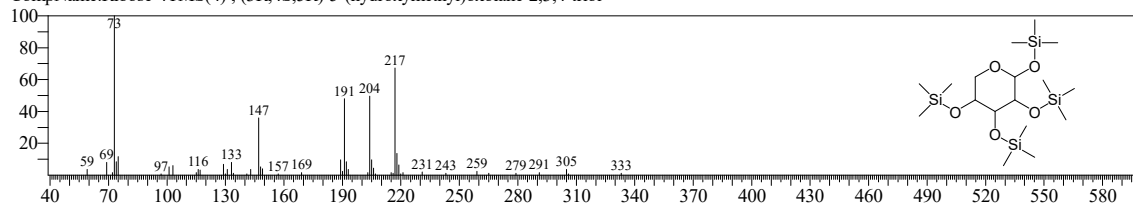

# TNAU

<< Target >>

Line#:7 R.Time:30.035(Scan#:5108) MassPeaks:332

RawMode:Averaged 30.030-30.040(5107-5109) BasePeak:207.00(1294)

BG Mode:Calc. from Peak Group 1 - Event 1 Q3 Scan

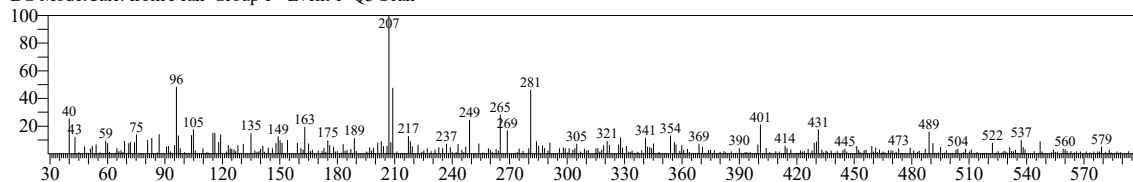

Hit#:1 Entry:330 Library:OA TMS\_DB5\_67min\_V3.lib

SI:26 Formula:C12H17NO3Si CAS:66407-11-2 MolWeight:251 RetIndex:1849

CompName:Hippuric acid-TMS ; 2-benzamidoacetic acid

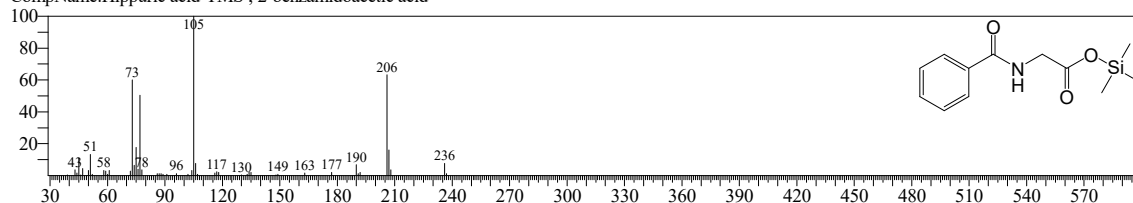

Hit#:2 Entry:19 Library:FA\_ME\_SP2560\_EI\_V3.lib

SI:26 Formula:C20H40O2 CAS:646-30-0 MolWeight:312 RetIndex:2699

CompName:Methyl nonadecanoate ; Nonadecanoic acid

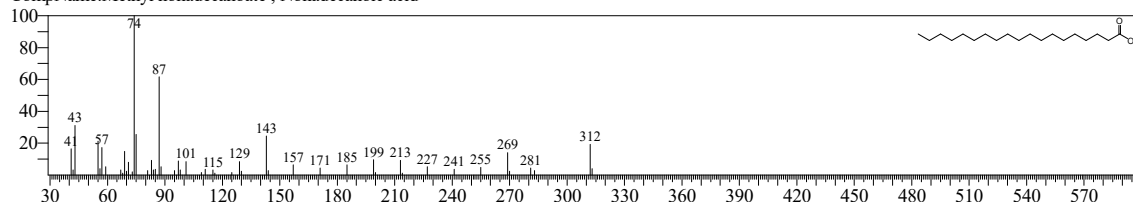

Hit#:3 Entry:413 Library:OA TMS\_DB5\_67min\_V3.lib

SI:25 Formula:C18H35NO3Si3 CAS:60-18-4 MolWeight:397 RetIndex:1958

CompName:Tyrosine-3TMS ; (2S)-2-amino-3-(4-hydroxyphenyl)propanoic acid

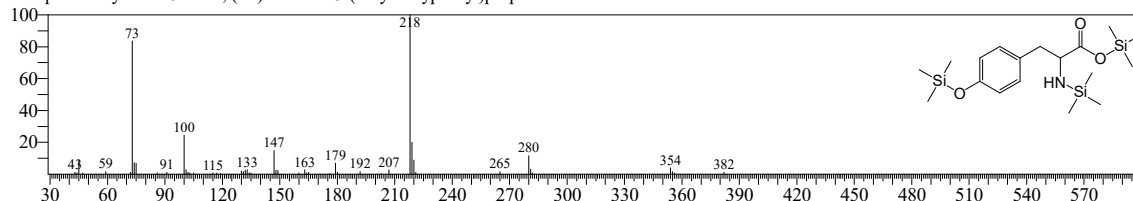

Hit#:4 Entry:456 Library:OA TMS\_DB5\_67min\_V3.lib

SI:24 Formula:C18H33NO3Si CAS:37350-58-6 MolWeight:339 RetIndex:2094

CompName:Metoprolol-TMS ; 1-[4-(2-methoxyethyl)phenoxy]-3-(propan-2-ylamino)propan-2-ol

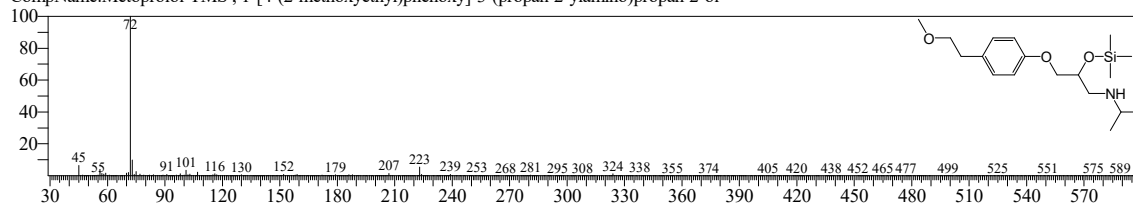

Hit#:5 Entry:28 Library:FA\_ME\_SP2560\_EI\_V3.lib

SI:24 Formula:C23H46O2 CAS:112-85-6 MolWeight:354 RetIndex:3005

CompName:Methyl behenate ; Docosanoic acid

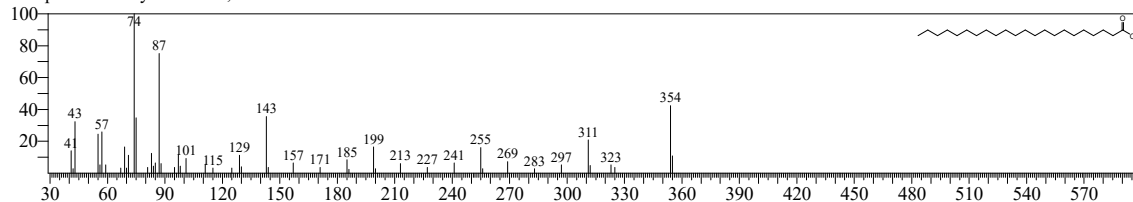



# TNAU

<< Target >>

Line#:8 R.Time:30.125(Scan#:5126) MassPeaks:297

RawMode:Averaged 30.120-30.130(5125-5127) BasePeak:207.05(2220)

BG Mode:Calc. from Peak Group 1 - Event 1 Q3 Scan

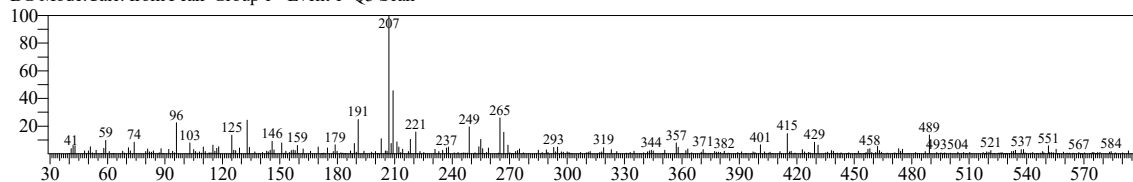

Hit#:1 Entry:310 Library:OA\_TMS\_DB5\_67min\_V3.lib

SI:26 Formula:C11H20N4OSi2 CAS:68-94-0 MolWeight:280 RetIndex:1822

CompName:Hypoxanthine-2TMS ; 3,7-dihdropurin-6-one

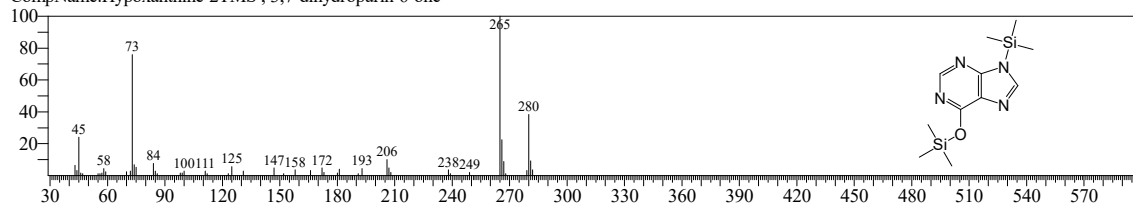

Hit#:2 Entry:463 Library:OA\_TMS\_DB5\_67min\_V3.lib

SI:25 Formula:C21H43NO4Si4 CAS:59-92-7 MolWeight:485 RetIndex:2123

CompName:Dopa-4TMS ; (2S)-2-amino-3-(3,4-dihydroxyphenyl)propanoic acid

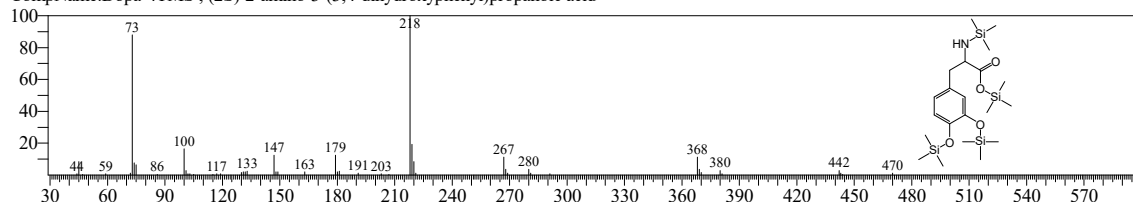

Hit#:3 Entry:476 Library:OA\_TMS\_DB5\_67min\_V3.lib

SI:24 Formula:C21H54NO8PSi5 CAS:4151-19-3 MolWeight:619 RetIndex:2152

CompName:Ribulose 5-phosphate-meto-5TMS(2) ; [(2R,3R)-2,3,5-trihydroxy-4-oxopentyl] dihydrogen phosphate

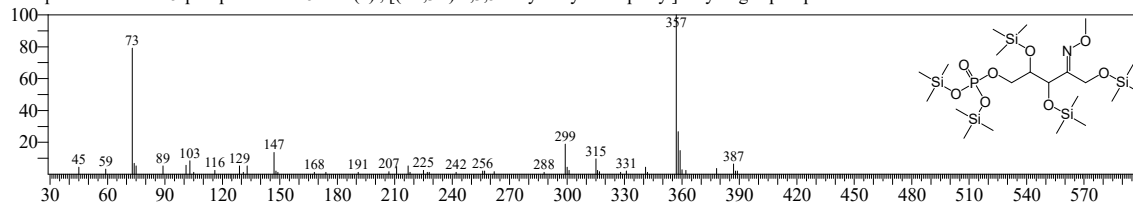

Hit#:4 Entry:382 Library:OA\_TMS\_DB5\_67min\_V3.lib

SI:24 Formula:C18H34O4Si3 CAS:6482-98-0 MolWeight:398 RetIndex:1918

CompName:4-Hydroxyphenyllactic acid-3TMS ; 2-hydroxy-3-(4-hydroxyphenyl)propanoate

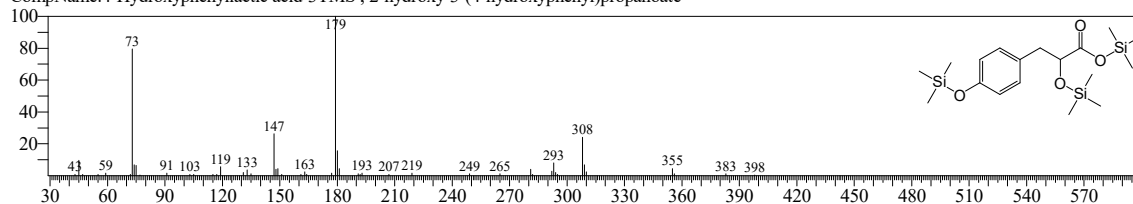

Hit#:5 Entry:413 Library:OA\_TMS\_DB5\_67min\_V3.lib

SI:24 Formula:C18H35NO3Si3 CAS:60-18-4 MolWeight:397 RetIndex:1958

CompName:Tyrosine-3TMS ; (2S)-2-amino-3-(4-hydroxyphenyl)propanoic acid

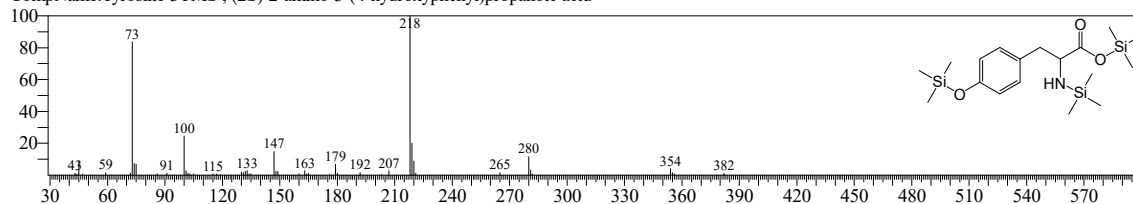

# TNAU

<< Target >>

Line#9 R.Time:30.360(Scan#:5173) MassPeaks:271

RawMode:Averaged 30.355-30.365(5172-5174) BasePeak:207.05(1974)

BG Mode:Calc. from Peak Group 1 - Event 1 Q3 Scan

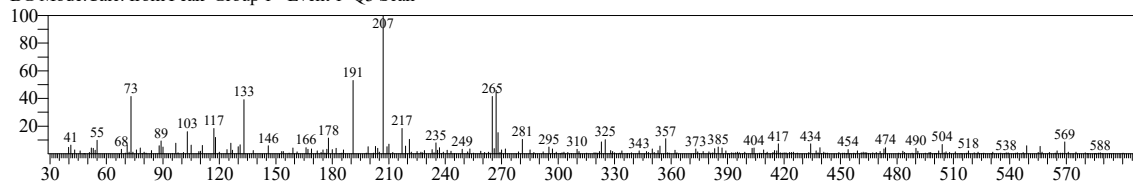

Hit#:1 Entry:250 Library:OA\_TMS\_DB5\_67min\_V3.lib

SI:40 Formula:C17H42O5Si4 CAS:50-69-1 MolWeight:438 RetIndex:1691

CompName:Ribose-4TMS(4) ; (3R,4S,5R)-5-(hydroxymethyl)oxolane-2,3,4-triol

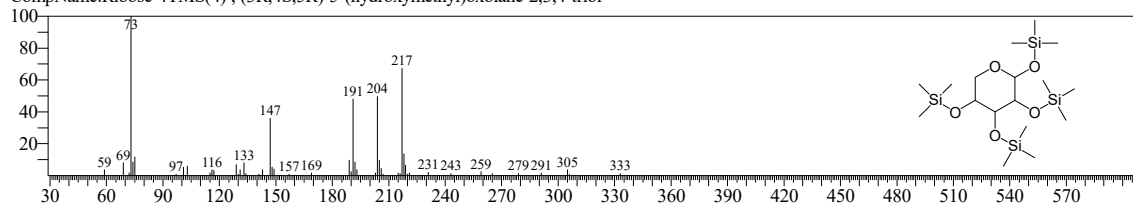

Hit#:2 Entry:210 Library:OA\_TMS\_DB5\_67min\_V3.lib

SI:40 Formula:C17H42O5Si4 CAS:10323-20-3 MolWeight:438 RetIndex:1634

CompName:Arabinose-4TMS(1) ; (2S,3R,4R)-2,3,4,5-tetrahydroxypentanal

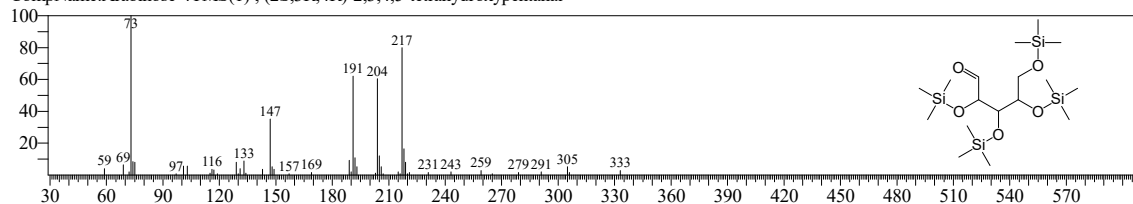

Hit#:3 Entry:238 Library:OA\_TMS\_DB5\_67min\_V3.lib

SI:39 Formula:C17H42O5Si4 CAS:1114-34-7 MolWeight:438 RetIndex:1675

CompName:Lyxose-4TMS(2) ; (2S,3S,4R)-2,3,4,5-tetrahydroxypentanal

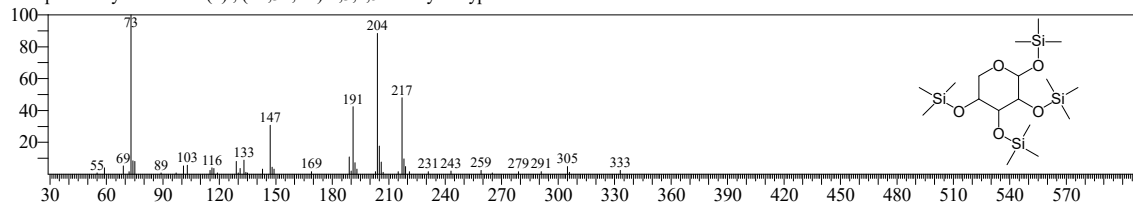

Hit#:4 Entry:295 Library:OA\_TMS\_DB5\_67min\_V3.lib

SI:38 Formula:C17H42O5Si4 CAS:58-86-6 MolWeight:438 RetIndex:1784

CompName:Xylose-4TMS(2) ; (2R,3S,4R)-2,3,4,5-tetrahydroxypentanal

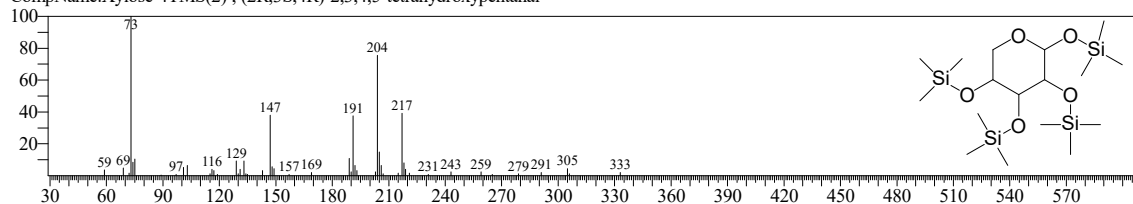

Hit#:5 Entry:148 Library:OA\_TMS\_DB5\_67min\_V3.lib

SI:37 Formula:C16H42O4Si4 CAS:2418-52-2 MolWeight:410 RetIndex:1512

CompName:Threitol-4TMS ; (2R,3R)-butane-1,2,3,4-tetrol

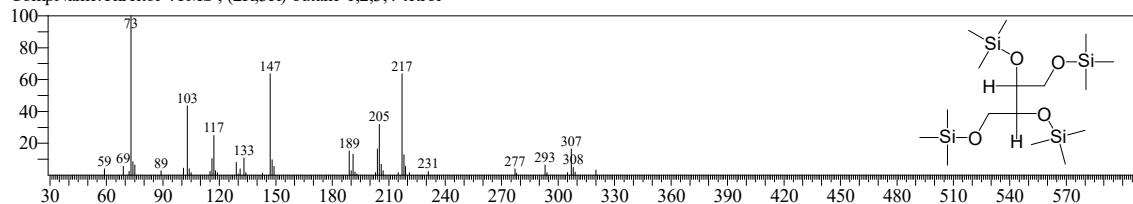

# TNAU

<< Target >>

Line#:10 R.Time:30.480(Scan#:5197) MassPeaks:316

RawMode:Averaged 30.475-30.485(5196-5198) BasePeak:207.05(647)

BG Mode:Calc. from Peak Group 1 - Event 1 Q3 Scan

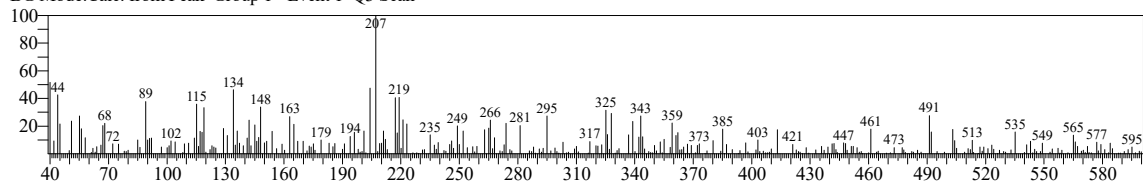

Hit#:1 Entry:276 Library:OA TMS DB5 67min V3.lib

SI:25 Formula:C18H44O5Si4 CAS:154-17-6 MolWeight:452 RetIndex:1745

CompName:2-Deoxy-glucose-4TMS(1) ; (2S,4S,5S,6S)-6-(hydroxymethyl)oxane-2,4,5-triol

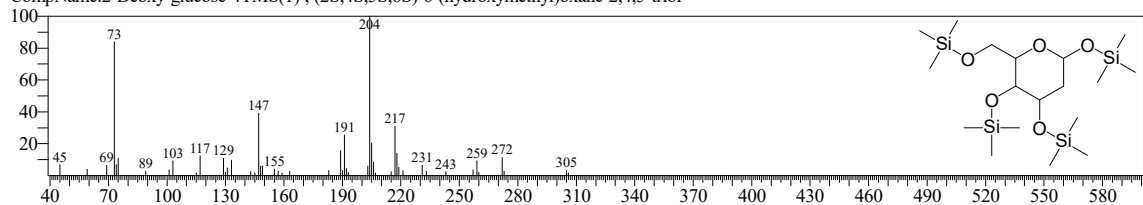

Hit#:2 Entry:288 Library:OA TMS DB5 67min V3.lib

SI:24 Formula:C21H52O6Si5 CAS:3458-28-4 MolWeight:540 RetIndex:1771

CompName:Mannose-5TMS(1) ; (3S,4S,5S,6R)-6-(hydroxymethyl)oxane-2,3,4,5-tetrol

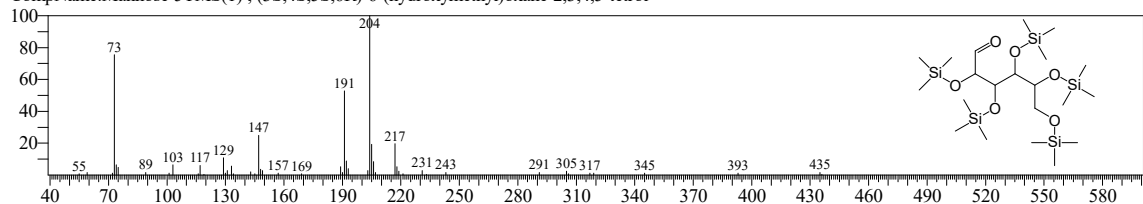

Hit#:3 Entry:345 Library:OA TMS DB5 67min V3.lib

SI:24 Formula:C21H52O6Si5 CAS:59-23-4 MolWeight:540 RetIndex:1868

CompName:Galactose-5TMS(2) ; (3R,4S,5R,6R)-6-(hydroxymethyl)oxane-2,3,4,5-tetrol

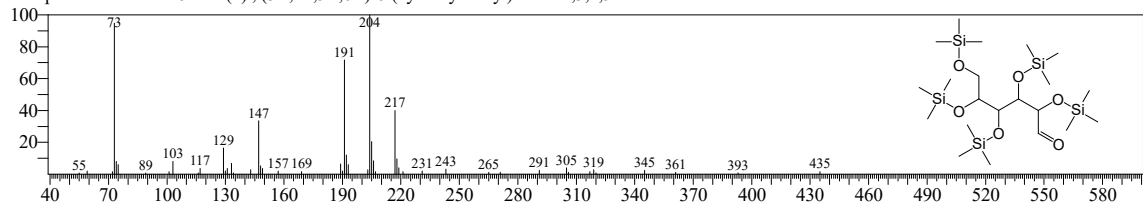

Hit#:4 Entry:386 Library:OA TMS DB5 67min V3.lib

SI:23 Formula:C21H52O6Si5 CAS:50-99-7 MolWeight:540 RetIndex:1922

CompName:Glucose-5TMS(1) ; (3R,4S,5S,6R)-6-(hydroxymethyl)oxane-2,3,4,5-tetrol

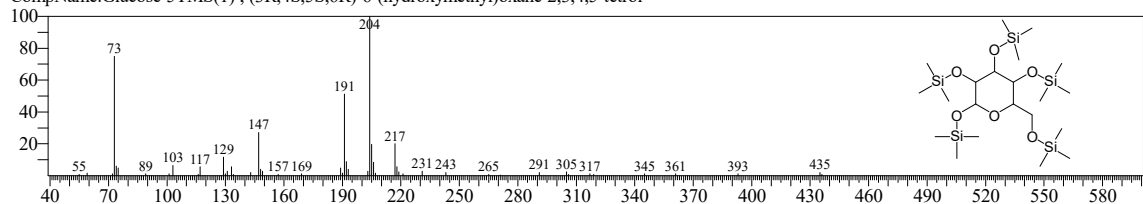

Hit#:5 Entry:219 Library:OA TMS DB5 67min V3.lib

SI:22 Formula:C18H44O5Si4 CAS:10485-94-6 MolWeight:452 RetIndex:1646

CompName:Rhamnose-4TMS(1) ; (2R,3R,4S,5S)-2,3,4,5-tetrahydroxyhexanal

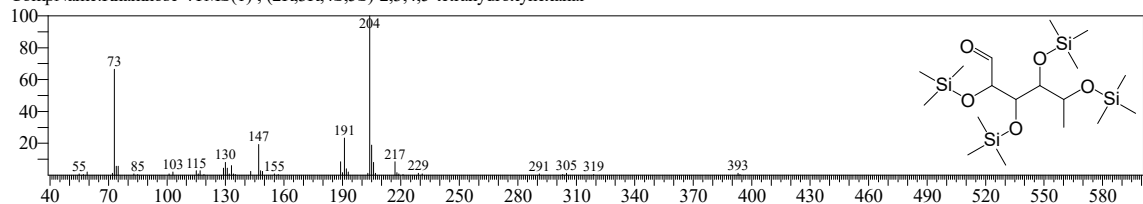

# TNAU

<< Target >>

Line#:11 R.Time:30.965(Scan#:5294) MassPeaks:312

RawMode:Averaged 30.960-30.970(5293-5295) BasePeak:283.05(833)

BG Mode:Calc. from Peak Group 1 - Event 1 Q3 Scan

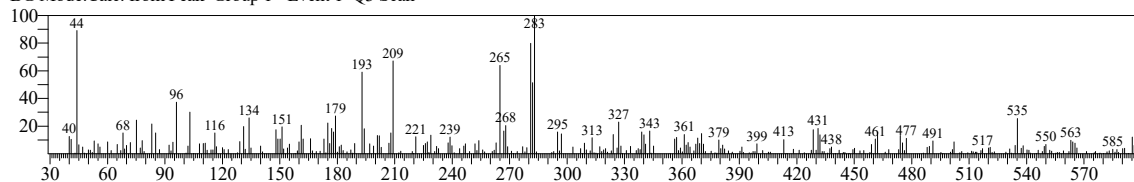

Hit#:1 Entry:211 Library:OA\_TMS\_DB5\_67min\_V3.lib

SI:30 Formula:C<sub>13</sub>H<sub>22</sub>O<sub>3</sub>Si<sub>2</sub> CAS:99-96-7 MolWeight:282 RetIndex:1636

CompName:4-Hydroxybenzoic acid-2TMS ; 4-hydroxybenzoic acid

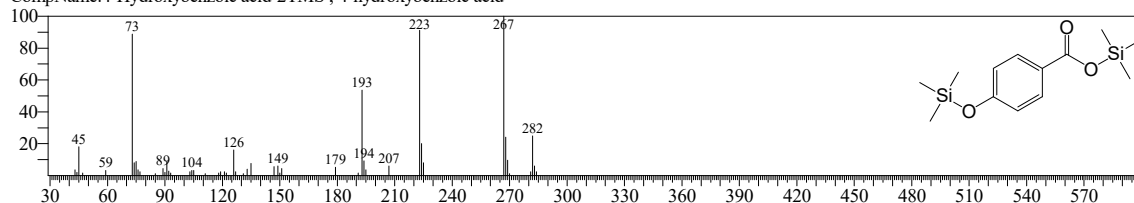

Hit#:2 Entry:179 Library:OA\_TMS\_DB5\_67min\_V3.lib

SI:29 Formula:C<sub>13</sub>H<sub>22</sub>O<sub>3</sub>Si<sub>2</sub> CAS:99-06-9 MolWeight:282 RetIndex:1572

CompName:3-Hydroxybenzoic acid-2TMS ; 3-hydroxybenzoic acid

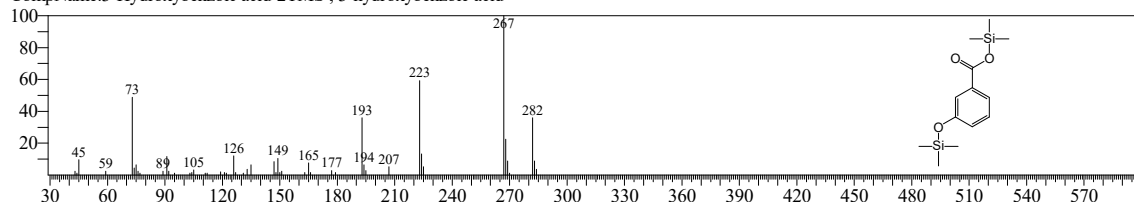

Hit#:3 Entry:341 Library:OA\_TMS\_DB5\_67min\_V3.lib

SI:28 Formula:C<sub>18</sub>H<sub>34</sub>O<sub>4</sub>Si<sub>3</sub> CAS:3247-75-4 MolWeight:398 RetIndex:1864

CompName:3-(3-Hydroxyphenyl)-3-hydroxypropionic acid-3TMS ; 3-hydroxy-3-(3-hydroxyphenyl)propanoic acid

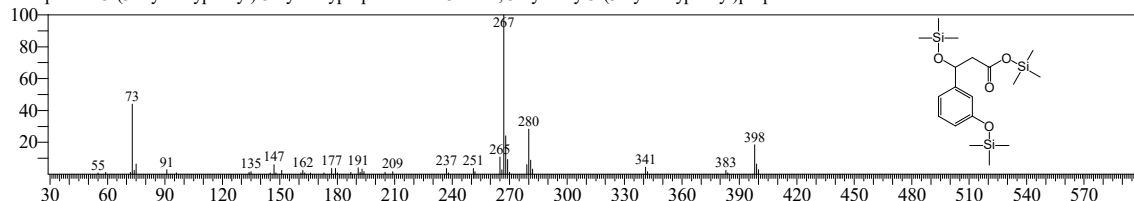

Hit#:4 Entry:315 Library:OA\_TMS\_DB5\_67min\_V3.lib

SI:28 Formula:C<sub>16</sub>H<sub>30</sub>O<sub>4</sub>Si<sub>3</sub> CAS:99-50-3 MolWeight:370 RetIndex:1833

CompName:Protocatechuic acid-3TMS ; 3,4-dihydroxybenzoic acid

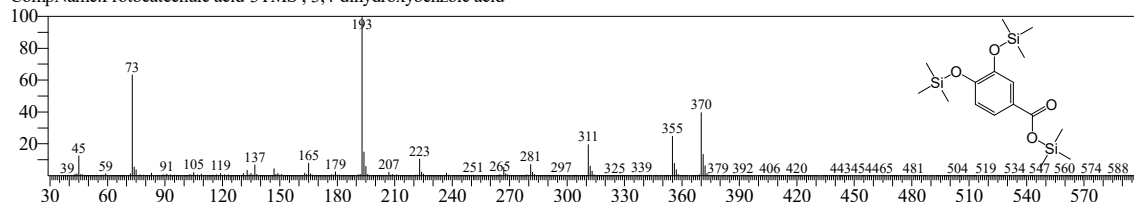

Hit#:5 Entry:150 Library:OA\_TMS\_DB5\_67min\_V3.lib

SI:26 Formula:C<sub>15</sub>H<sub>26</sub>O<sub>3</sub>Si<sub>2</sub> CAS:515-30-0 MolWeight:310 RetIndex:1517

CompName:2-Phenyllactic acid-2TMS ; 2-hydroxy-3-phenylpropanoic acid

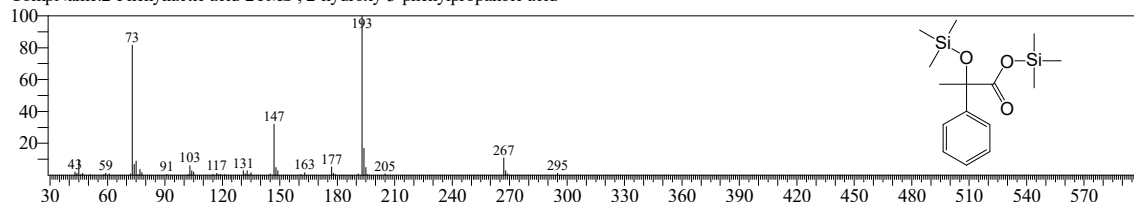

# TNAU

<< Target >>

Line#:12 R.Time:31.900(Scan#:5481) MassPeaks:348

RawMode:Averaged 31.895-31.905(5480-5482) BasePeak:139.10(1967)

BG Mode:Calc. from Peak Group 1 - Event 1 Q3 Scan

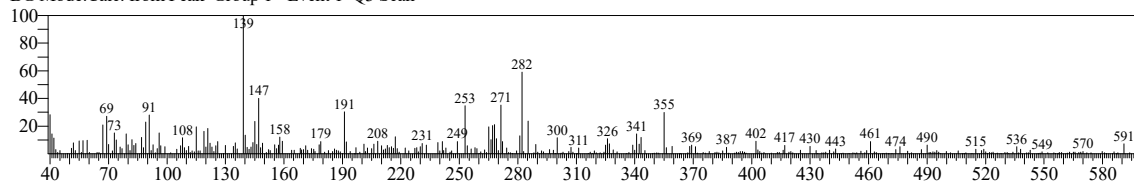

Hit#:1 Entry:438 Library:OA TMS DB5 67min V3.lib

SI:32 Formula:C12H22N2O2Si2 CAS:104-98-3 MolWeight:282 RetIndex:2014

CompName:Urocanic acid-2TMS ; (E)-3-(1H-imidazol-5-yl)prop-2-enoic acid

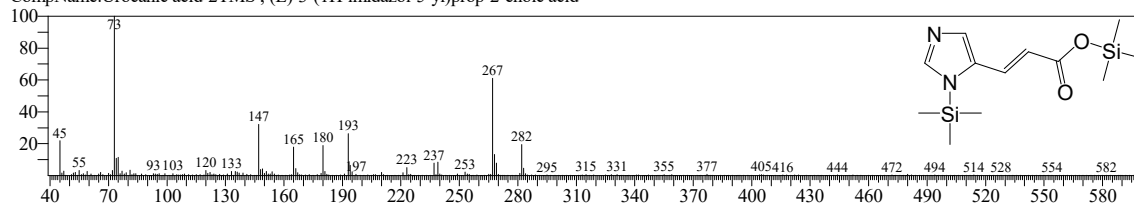

Hit#:2 Entry:341 Library:OA TMS DB5 67min V3.lib

SI:32 Formula:C18H34O4Si3 CAS:3247-75-4 MolWeight:398 RetIndex:1864

CompName:3-(3-Hydroxyphenyl)-3-hydroxypropionic acid-3TMS ; 3-hydroxy-3-(3-hydroxyphenyl)propanoic acid

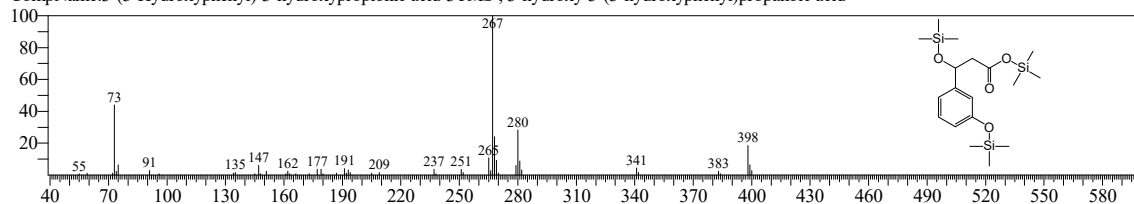

Hit#:3 Entry:211 Library:OA TMS DB5 67min V3.lib

SI:30 Formula:C13H22O3Si2 CAS:99-96-7 MolWeight:282 RetIndex:1636

CompName:4-Hydroxybenzoic acid-2TMS ; 4-hydroxybenzoic acid

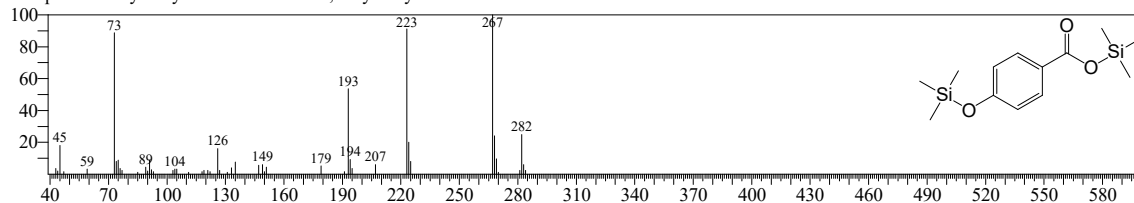

Hit#:4 Entry:15 Library:FA ME SP2560 EI V3.lib

SI:29 Formula:C18H34O2 CAS:29743-97-3 MolWeight:282 RetIndex:2581

CompName:Methyl cis-10-heptadecenoate ; Heptadec-10-enoic acid

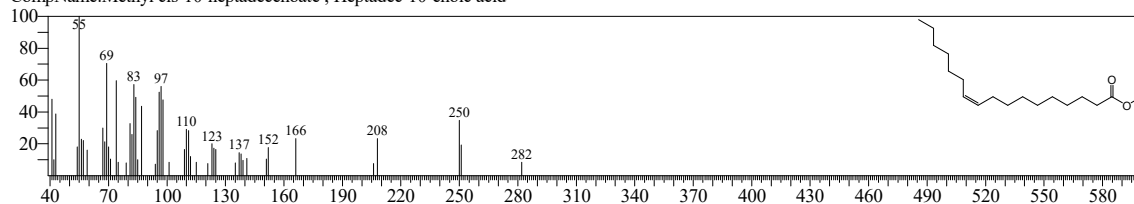

Hit#:5 Entry:179 Library:OA TMS DB5 67min V3.lib

SI:29 Formula:C13H22O3Si2 CAS:99-06-9 MolWeight:282 RetIndex:1572

CompName:3-Hydroxybenzoic acid-2TMS ; 3-hydroxybenzoic acid

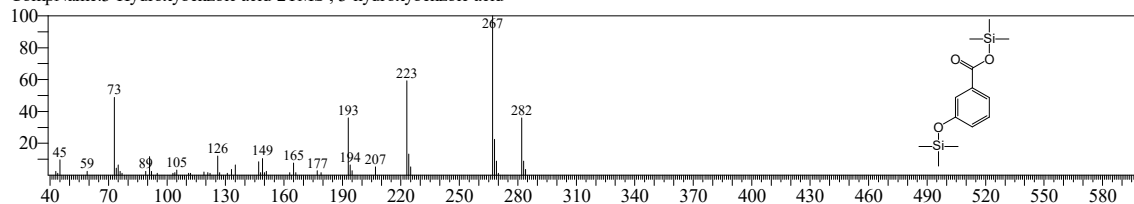

# TNAU

<< Target >>

Line#:13 R.Time:32.015(Scan#:5504) MassPeaks:329

RawMode:Averaged 32.010-32.020(5503-5505) BasePeak:281.00(2130)

BG Mode:Calc. from Peak Group 1 - Event 1 Q3 Scan

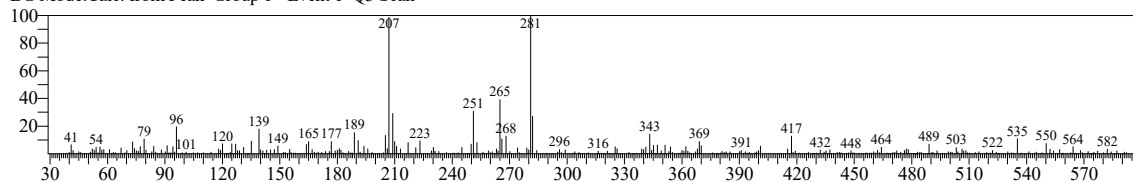

Hit#:1 Entry:310 Library:OA\_TMS\_DB5\_67min\_V3.lib

SI:33 Formula:C11H20N4OSi2 CAS:68-94-0 MolWeight:280 RetIndex:1822

CompName:Hypoxanthine-2TMS ; 3,7-dihydropurin-6-one

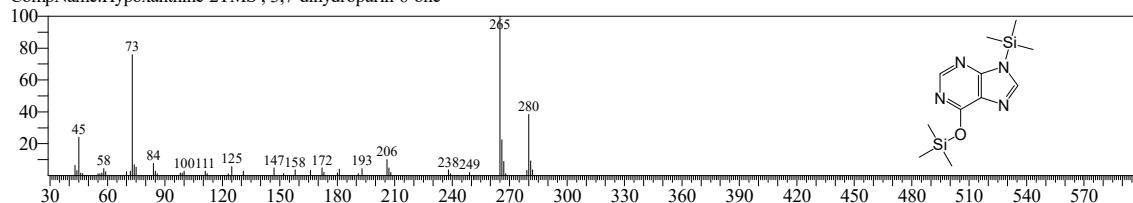

Hit#:2 Entry:328 Library:OA\_TMS\_DB5\_67min\_V3.lib

SI:33 Formula:C13H23NO2Si2 CAS:150-13-0 MolWeight:281 RetIndex:1845

CompName:4-Aminobenzoic acid-2TMS ; 4-aminobenzoic acid

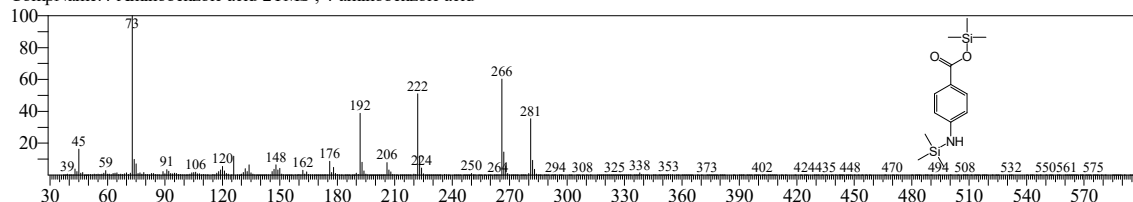

Hit#:3 Entry:368 Library:OA\_TMS\_DB5\_67min\_V3.lib

SI:32 Formula:C17H35NO2Si3 CAS:1196-92-5 MolWeight:369 RetIndex:1899

CompName:Vanillylamine-3TMS ; 4-(aminomethyl)-2-methoxyphenol

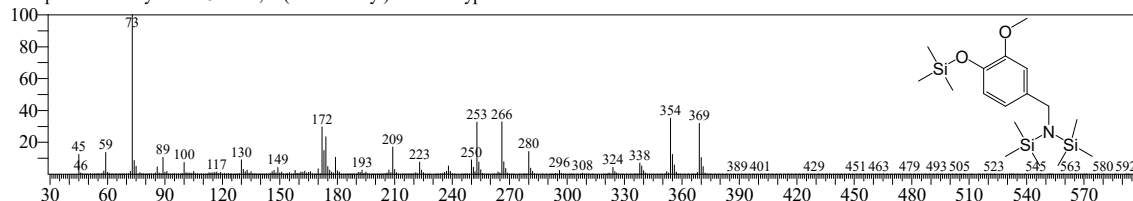

Hit#:4 Entry:203 Library:OA\_TMS\_DB5\_67min\_V3.lib

SI:30 Formula:C13H23NO2Si2 CAS:118-92-3 MolWeight:281 RetIndex:1623

CompName:Anthranilic acid-2TMS ; 2-aminobenzoic acid

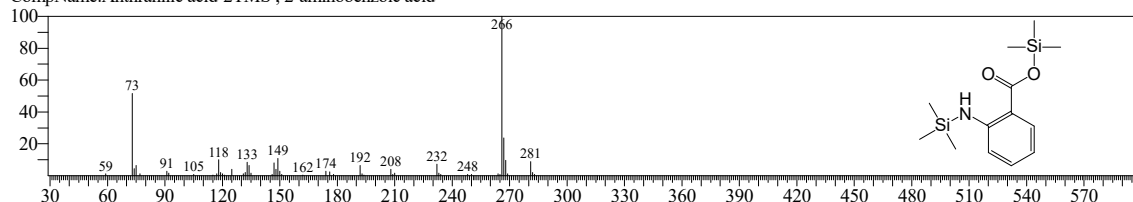

Hit#:5 Entry:384 Library:OA\_TMS\_DB5\_67min\_V3.lib

SI:29 Formula:C17H35NO3Si3 CAS:65-23-6 MolWeight:385 RetIndex:1919

CompName:Pyridoxine-3TMS ; 4,5-bis(hydroxymethyl)-2-methylpyridin-3-ol

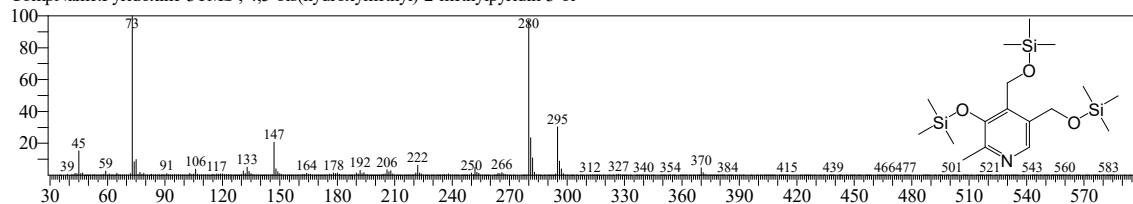

# TNAU

<< Target >>

Line#:14 R.Time:32.100(Scan#:5521) MassPeaks:267

RawMode:Averaged 32.095-32.105(5520-5522) BasePeak:281.05(815)

BG Mode:Calc. from Peak Group 1 - Event 1 Q3 Scan

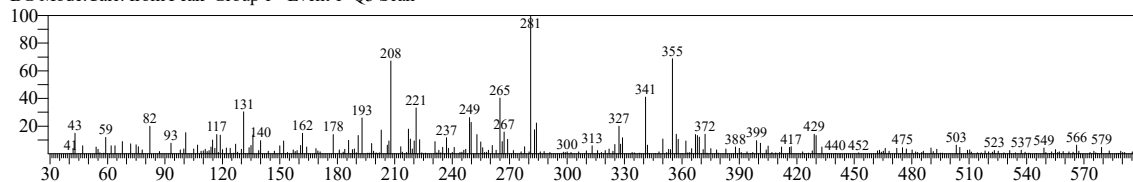

Hit#:1 Entry:402 Library:OA\_TMS\_DB5\_67min\_V3.lib

SI:32 Formula:C20H42O4Si4 CAS:775-01-9 MolWeight:458 RetIndex:1942

CompName:3,4-Dihydroxymandelic acid-4TMS ; 2-(3,4-dihydroxyphenyl)-2-hydroxyacetic acid

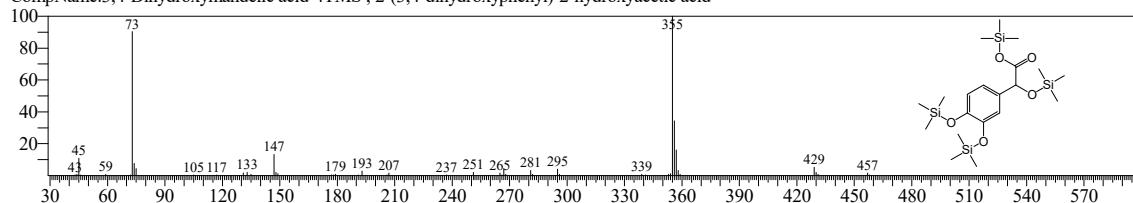

Hit#:2 Entry:315 Library:OA\_TMS\_DB5\_67min\_V3.lib

SI:25 Formula:C16H30O4Si3 CAS:99-50-3 MolWeight:370 RetIndex:1833

CompName:Protocatechuic acid-3TMS ; 3,4-dihydroxybenzoic acid

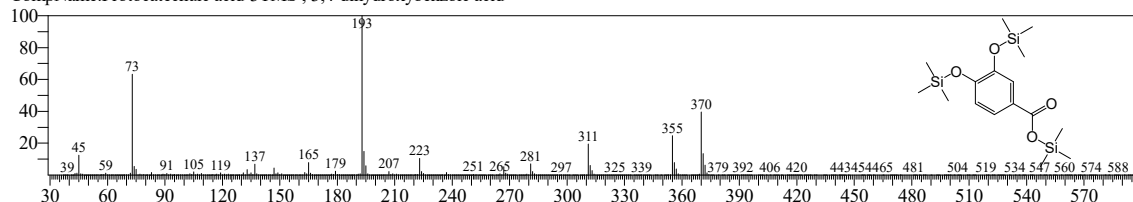

Hit#:3 Entry:310 Library:OA\_TMS\_DB5\_67min\_V3.lib

SI:25 Formula:C11H20N4OSi2 CAS:68-94-0 MolWeight:280 RetIndex:1822

CompName:Hypoxanthine-2TMS ; 3,7-dihydropurin-6-one

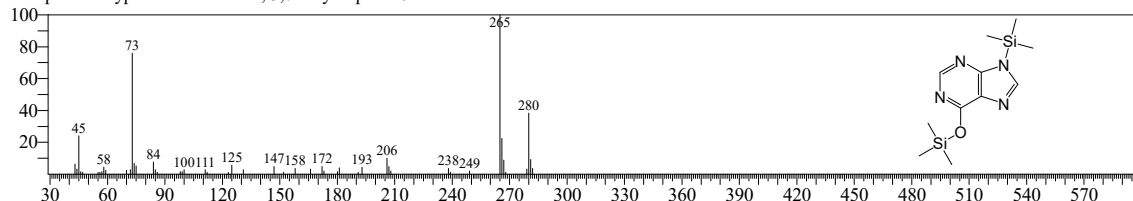

Hit#:4 Entry:211 Library:OA\_TMS\_DB5\_67min\_V3.lib

SI:24 Formula:C13H22O3Si2 CAS:99-96-7 MolWeight:282 RetIndex:1636

CompName:4-Hydroxybenzoic acid-2TMS ; 4-hydroxybenzoic acid

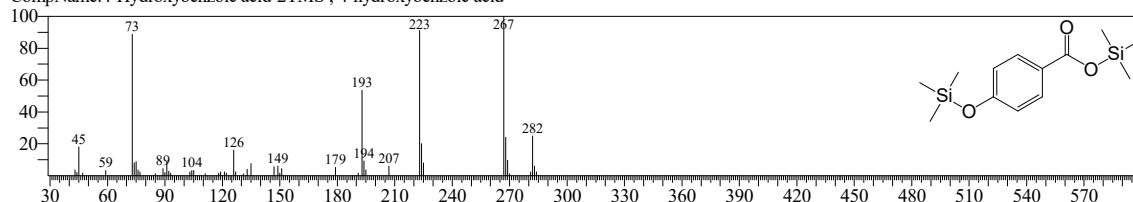

Hit#:5 Entry:413 Library:OA\_TMS\_DB5\_67min\_V3.lib

SI:23 Formula:C18H35NO3Si3 CAS:60-18-4 MolWeight:397 RetIndex:1958

CompName:Tyrosine-3TMS ; (2S)-2-amino-3-(4-hydroxyphenyl)propanoic acid



<< Target >>

Line#:15 R.Time:32.805(Scan#:5662) MassPeaks:285

RawMode:Averaged 32.800-32.810(5661-5663) BasePeak:267.00(1103)

BG Mode:Calc. from Peak Group 1 - Event 1 Q3 Scan

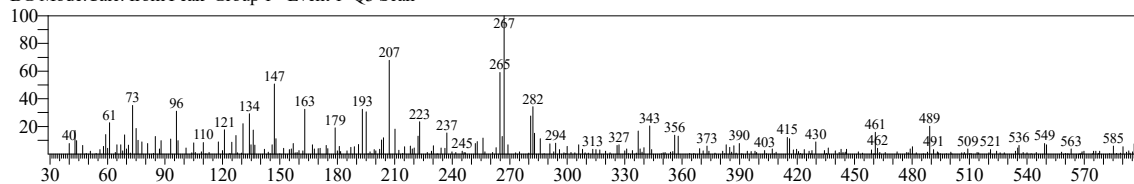

Hit#:1 Entry:211 Library:OA\_TMS\_DB5\_67min\_V3.lib

SI:47 Formula:C<sub>13</sub>H<sub>22</sub>O<sub>3</sub>Si<sub>2</sub> CAS:99-96-7 MolWeight:282 RetIndex:1636

CompName:4-Hydroxybenzoic acid-2TMS ; 4-hydroxybenzoic acid

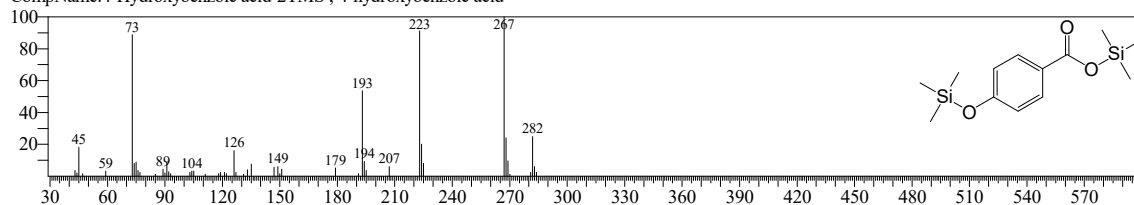

Hit#:2 Entry:179 Library:OA\_TMS\_DB5\_67min\_V3.lib

SI:47 Formula:C<sub>13</sub>H<sub>22</sub>O<sub>3</sub>Si<sub>2</sub> CAS:99-06-9 MolWeight:282 RetIndex:1572

CompName:3-Hydroxybenzoic acid-2TMS ; 3-hydroxybenzoic acid

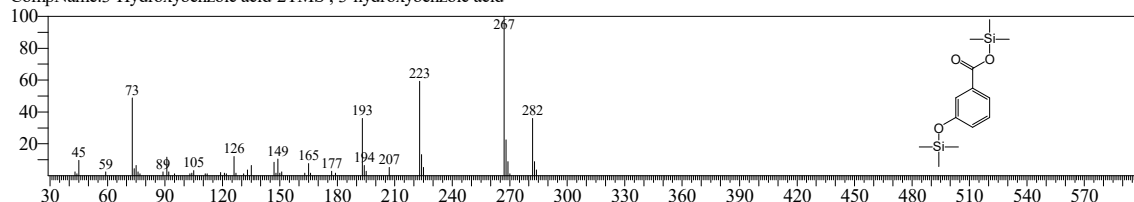

Hit#:3 Entry:328 Library:OA\_TMS\_DB5\_67min\_V3.lib

SI:40 Formula:C<sub>13</sub>H<sub>23</sub>NO<sub>2</sub>Si<sub>2</sub> CAS:150-13-0 MolWeight:281 RetIndex:1845

CompName:4-Aminobenzoic acid-2TMS ; 4-aminobenzoic acid

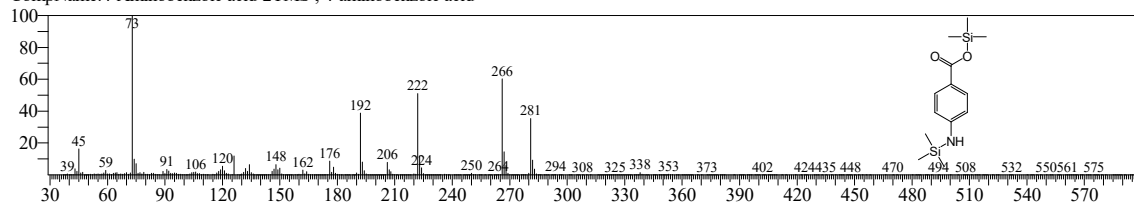

Hit#:4 Entry:438 Library:OA\_TMS\_DB5\_67min\_V3.lib

SI:39 Formula:C<sub>12</sub>H<sub>22</sub>N<sub>2</sub>O<sub>2</sub>Si<sub>2</sub> CAS:104-98-3 MolWeight:282 RetIndex:2014

CompName:Urocanic acid-2TMS ; (E)-3-(1H-imidazol-5-yl)prop-2-enoic acid

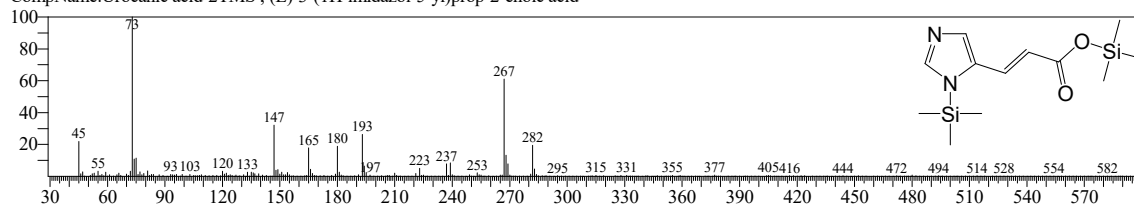

Hit#:5 Entry:341 Library:OA\_TMS\_DB5\_67min\_V3.lib

SI:39 Formula:C<sub>18</sub>H<sub>34</sub>O<sub>4</sub>Si<sub>3</sub> CAS:3247-75-4 MolWeight:398 RetIndex:1864

CompName:3-(3-Hydroxyphenyl)-3-hydroxypropionic acid-3TMS ; 3-hydroxy-3-(3-hydroxyphenyl)propanoic acid

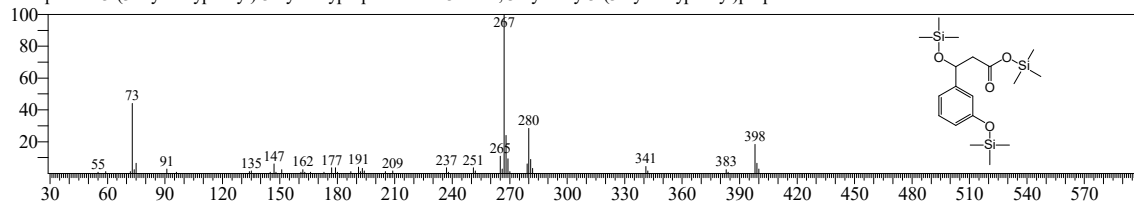

Supplement: Supplementary file 66 [file supplementary]
