# Supplementary material for: Comparative Metabolomics Profiling Reveals Key Metabolites and Associated Pathways Regulating Tuber Dormancy in White Yam (<em>Dioscorea rotundata</em>)
Source: Preprints.org preprint supplement (doi:10.20944/preprints202303.0378.v1), 2023-03-21

# TNAU

## Sample Information

Analyzed by : Admin  
 Analyzed : 01-Sep-22 10:51:00 PM  
 Sample Type : Unknown  
 Level # : 1  
 Sample Name : Sample  
 Sample ID : 2-3  
 IS Amount : [1]=1  
 Sample Amount : 1  
 Dilution Factor : 1  
 Vial # : 3  
 Injection Volume : 2.00  
 Data File : D:\GCMS-8040NX\Sep 2022\Users\01.09.2022\01092022007.qgd  
 Org Data File : D:\GCMS-8040NX\Sep 2022\Users\01.09.2022\01092022007.qgd  
 Method File : D:\GCMS-8040NX\Sep 2022\Method\Scan\_methodfile.qgm  
 Org Method File : D:\GCMS-8040NX\Sep 2022\Method\Scan\_methodfile.qgm  
 Report File :  
 Tuning File : D:\GCMS-8040NX\Aug 2022\Tuning Data\TUNING 25082022.qgt  
 Modified by : Admin  
 Modified : 05-Sep-22 10:57:45 AM

Chromatogram Sample D:\GCMS-8040NX\Sep 2022\Users\01.09.2022\01092022007.qgd

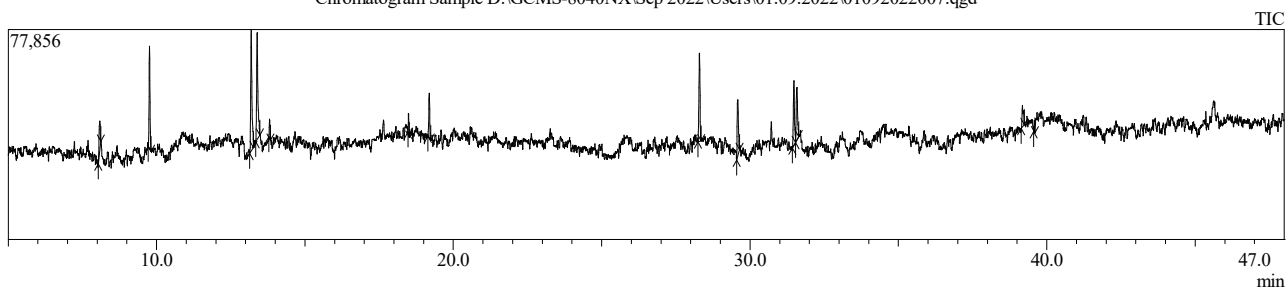

Peak Report TIC

| Peak# | R.Time | Area   | Area%  | Height | Height% | A/H  | Similarity | Name                                    |
|-------|--------|--------|--------|--------|---------|------|------------|-----------------------------------------|
| 1     | 8.087  | 32572  | 4.47   | 11001  | 4.01    | 2.96 | 83         | 1-Butanol, 3-methyl-, acetate           |
| 2     | 9.763  | 81477  | 11.18  | 38195  | 13.91   | 2.13 | 96         | Pentasiloxane, dodecamethyl-            |
| 3     | 13.189 | 132850 | 18.23  | 45064  | 16.41   | 2.95 | 54         | Methyl cis-13,16-Docosadienate          |
| 4     | 13.389 | 119788 | 16.44  | 39725  | 14.46   | 3.02 | 53         | Methyl cis-13,16-Docosadienate          |
| 5     | 13.808 | 13239  | 1.82   | 7128   | 2.60    | 1.86 | 81         | Trisiloxane, octamethyl-                |
| 6     | 18.491 | 11890  | 1.63   | 7682   | 2.80    | 1.55 | 77         | 2,4-Di-tert-butylphenol                 |
| 7     | 19.189 | 38304  | 5.26   | 16718  | 6.09    | 2.29 | 92         | 2,4-Di-tert-butylphenoxytrimethylsilane |
| 8     | 28.293 | 81099  | 11.13  | 32760  | 11.93   | 2.48 | 95         | n-Hexadecanoic acid                     |
| 9     | 29.587 | 59874  | 8.21   | 20644  | 7.52    | 2.90 | 87         | Scyllo-Inositol, 6TMS                   |
| 10    | 31.480 | 66824  | 9.17   | 23897  | 8.70    | 2.80 | 94         | 10E,12Z-Octadecadienoic acid            |
| 11    | 31.582 | 62701  | 8.60   | 19465  | 7.09    | 3.22 | 87         | cis,cis,cis-7,10,13-Hexadecatrienal     |
| 12    | 39.177 | 23922  | 3.28   | 8006   | 2.91    | 2.99 | 59         | Palmitic acid-TMS                       |
| 13    | 39.579 | 4314   | 0.59   | 4394   | 1.60    | 0.98 | 14         | Octadecanol-TMS                         |
|       |        | 728854 | 100.00 | 274679 | 100.00  |      |            |                                         |

Library

# TNAU

<< Target >>

Line#:1 R.Time:8.085(Scan#:618) MassPeaks:314  
RawMode:Averaged 8.080-8.090(617-619) BasePeak:43.05(2407)  
BG Mode:Calc. from Peak Group 1 - Event 1 Q3 Scan

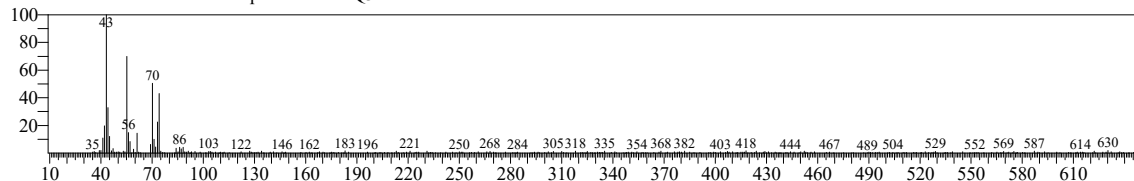

Hit#:1 Entry:6783 Library:NIST20R.lib  
SI:83 Formula:C7H14O2 CAS:123-92-2 MolWeight:130 RetIndex:820  
CompName:1-Butanol, 3-methyl-, acetate \$\$ Isopentyl alcohol, acetate \$\$ Acetic acid, 3-methylbutyl ester \$\$ Banana oil \$\$ Isoamyl acetate \$\$ Isoamyl etha

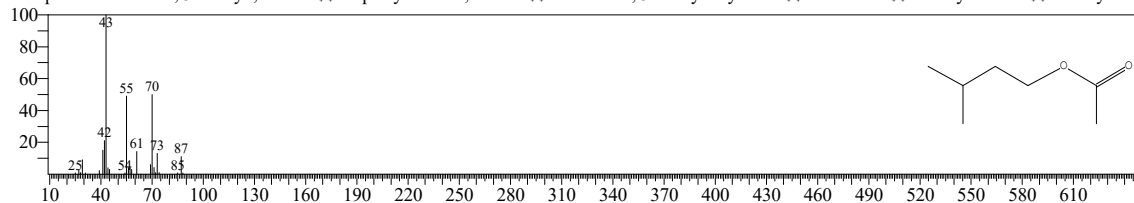

Hit#:2 Entry:8685 Library:NIST20M1.lib  
SI:81 Formula:C7H14O2 CAS:628-63-7 MolWeight:130 RetIndex:884  
CompName:Acetic acid, pentyl ester \$\$ n-Amyl acetate \$\$ n-Pentyl acetate \$\$ Amyl acetate \$\$ Birnenool \$\$ Pentyl acetate \$\$ Acetic acid, amyl ester \$\$ An

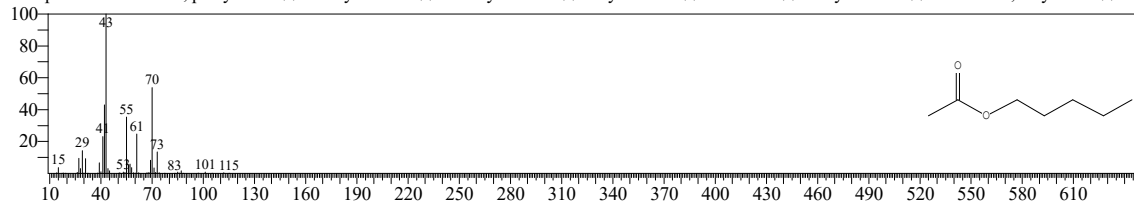

Hit#:3 Entry:6819 Library:NIST20R.lib  
SI:80 Formula:C7H14O2 CAS:624-41-9 MolWeight:130 RetIndex:820  
CompName:1-Butanol, 2-methyl-, acetate \$\$ 2-Methyl-1-butyl acetate \$\$ 2-Methylbutyl acetate \$\$ Acetic acid 2-methylbutyl ester \$\$ 2-Methylbutyl acetate :

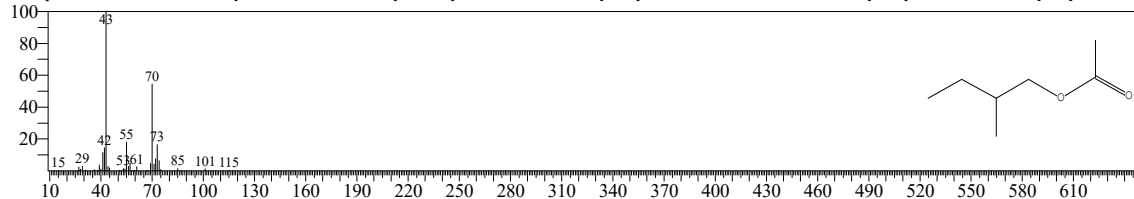

Hit#:4 Entry:4411 Library:NIST20R.lib  
SI:78 Formula:C6H12O2 CAS:110-45-2 MolWeight:116 RetIndex:818  
CompName:1-Butanol, 3-methyl-, formate \$\$ Isopentyl alcohol, formate \$\$ Isoamyl formate \$\$ Isoamyl methanoate \$\$ Isopentyl formate \$\$ 3-Methylbutyl

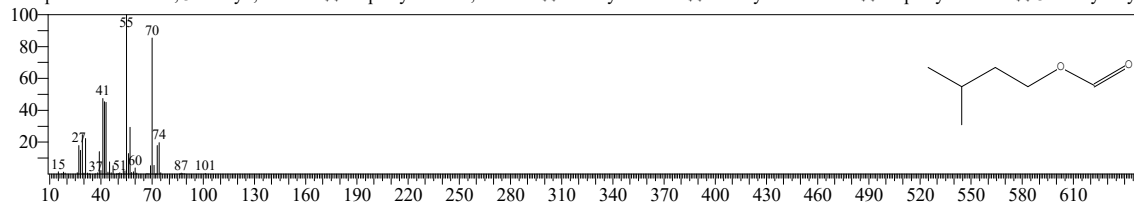

Hit#:5 Entry:5029 Library:NIST20M1.lib  
SI:78 Formula:C7H16O CAS:6570-87-2 MolWeight:116 RetIndex:832  
CompName:1-Pentanol, 3,4-dimethyl- \$\$ 3,4-Dimethyl-1-pentanol \$\$ Pentanol, 3,4-dimethyl

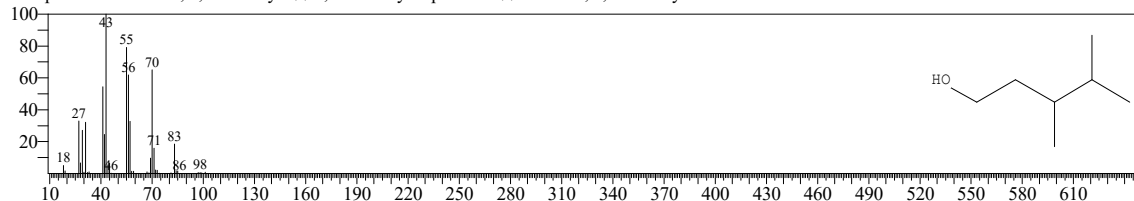

# TNAU

<< Target >>

Line# 2 R.Time: 9.765 (Scan#: 954) MassPeaks: 326

RawMode: Averaged 9.760-9.770 (953-955) BasePeak: 281.05 (9358)

BG Mode: Calc. from Peak Group 1 - Event 1 Q3 Scan

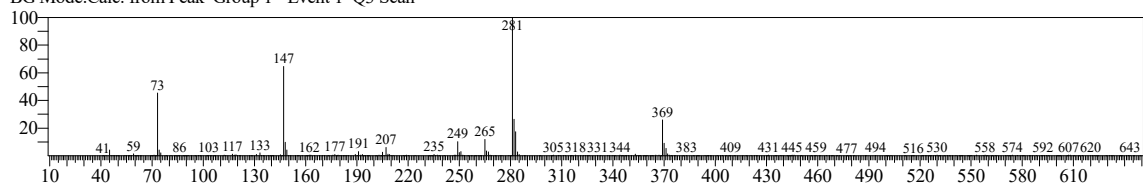

Hit#: 1 Entry: 40975 Library: NIST20R.lib

SI: 96 Formula: C<sub>12</sub>H<sub>36</sub>O<sub>4</sub>Si<sub>5</sub> CAS: 141-63-9 MolWeight: 384 RetIndex: 1068

CompName: Pentasiloxane, dodecamethyl- \$\$ Dodecamethylpentasiloxane \$\$ 1,1,1,3,3,5,5,7,7,9,9,9-Dodecamethylpentasiloxane #

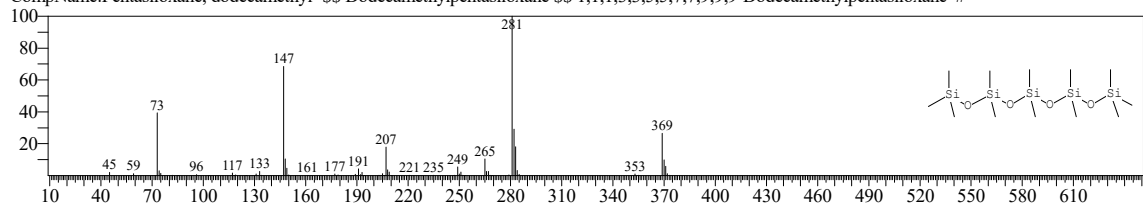

Hit#: 2 Entry: 249272 Library: NIST20M1.lib

SI: 84 Formula: C<sub>12</sub>H<sub>36</sub>O<sub>4</sub>Si<sub>5</sub> CAS: 3555-47-3 MolWeight: 384 RetIndex: 1068

CompName: Trisiloxane, 1,1,1,5,5,5-hexamethyl-3,3-bis[(trimethylsilyl)oxy]- \$\$ Tetrakis(trimethylsiloxy)silane \$\$ Trisiloxane, 1,1,1,5,5,5-hexamethyl-3,3-b

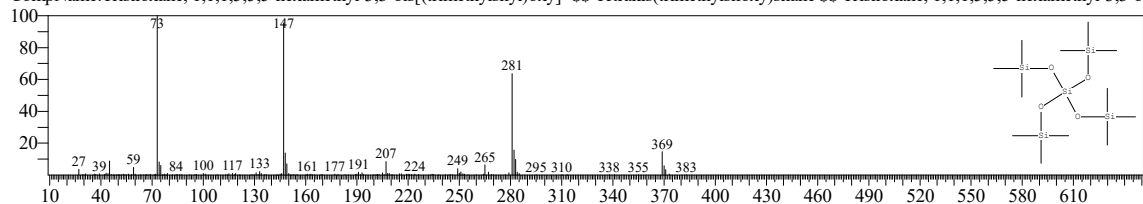

Hit#: 3 Entry: 27848 Library: NIST20M2.lib

SI: 82 Formula: C<sub>18</sub>H<sub>48</sub>O<sub>4</sub>Si<sub>5</sub> CAS: 0-00-0 MolWeight: 468 RetIndex: 1495

CompName: 1,3,5,7,9-Pentasiloxane, 1,1,3,3,5,5,7,7,9,9-decamethyl-1,9-di(tert.butyl)-

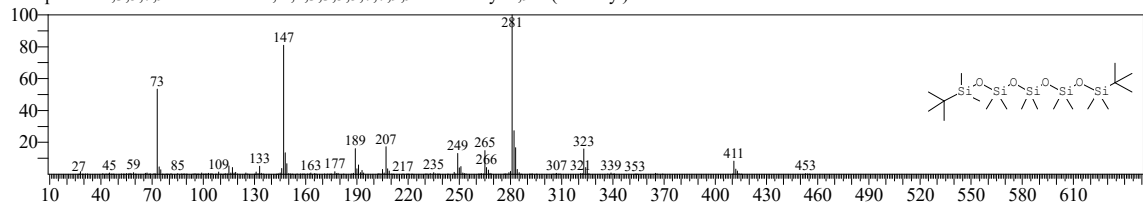

Hit#: 4 Entry: 249271 Library: NIST20M1.lib

SI: 80 Formula: C<sub>12</sub>H<sub>36</sub>O<sub>4</sub>Si<sub>5</sub> CAS: 38146-99-5 MolWeight: 384 RetIndex: 1068

CompName: 1,1,1,3,3,5,5,7,7-Nonamethyl-3-(trimethylsiloxy)tetrasiloxane \$\$ 1,1,1,3,3,5,5,7,7-Nonamethyl-5-[(trimethylsilyl)oxy]tetrasiloxane #

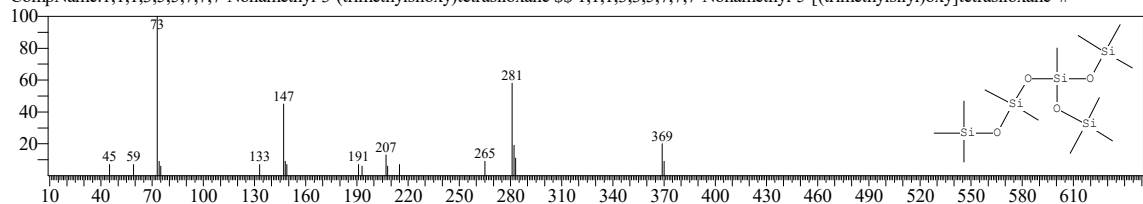

Hit#: 5 Entry: 158097 Library: NIST20M1.lib

SI: 77 Formula: C<sub>14</sub>H<sub>24</sub>O<sub>3</sub>Si<sub>2</sub> CAS: 0-00-0 MolWeight: 296 RetIndex: 1625

CompName: 2,6-Dihydroxyacetophenone, 2TMS derivative \$\$ 2',6'-Dihydroxyacetophenone, bis(trimethylsilyl) ether

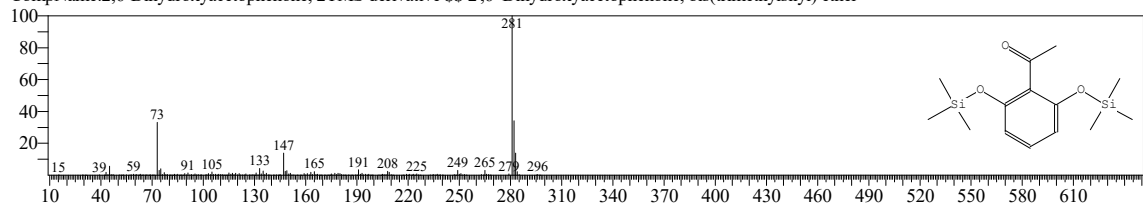

# TNAU

<< Target >>

Line#:3 R.Time:13.190(Scan#:1639) MassPeaks:385

RawMode:Averaged 13.185-13.195(1638-1640) BasePeak:155.05(6596)

BG Mode:Calc. from Peak Group 1 - Event 1 Q3 Scan

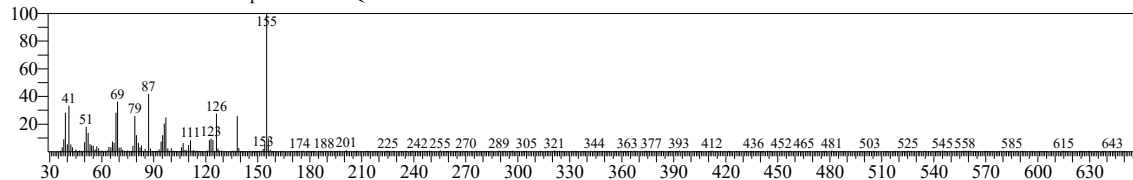

Hit#:1 Entry:34 Library:FA\_ME\_SP2560\_EI\_V3.lib

SI:54 Formula:C23H42O2 CAS:7370-49-2 MolWeight:350 RetIndex:3169

CompName:Methyl cis-13,16-Docosadienate ; (13Z,16E)-docosa-13,16-dienoic acid

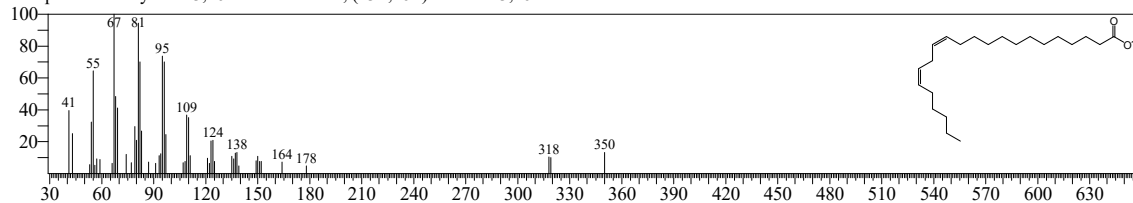

Hit#:2 Entry:21 Library:FA\_ME\_SP2560\_EI\_V3.lib

SI:53 Formula:C19H34O2 CAS:60-33-3 MolWeight:294 RetIndex:2775

CompName:Methyl linoleate ; Octadeca-9,12-dienoic acid

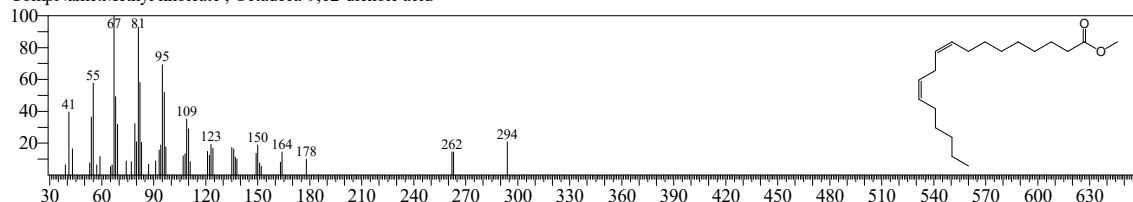

Hit#:3 Entry:20 Library:FA\_ME\_SP2560\_EI\_V3.lib

SI:52 Formula:C19H34O2 CAS:506-21-8 MolWeight:294 RetIndex:2727

CompName:Methyl linolelaidate ; (9E,12E)-octadeca-9,12-dienoic acid

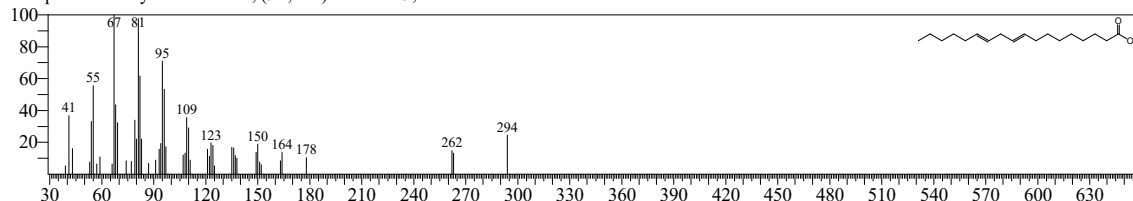

Hit#:4 Entry:27 Library:FA\_ME\_SP2560\_EI\_V3.lib

SI:52 Formula:C21H38O2 CAS:2091-39-6 MolWeight:322 RetIndex:2973

CompName:Methyl cis-11,14-Icosadienoate ; Icosa-11,14-dienoic acid

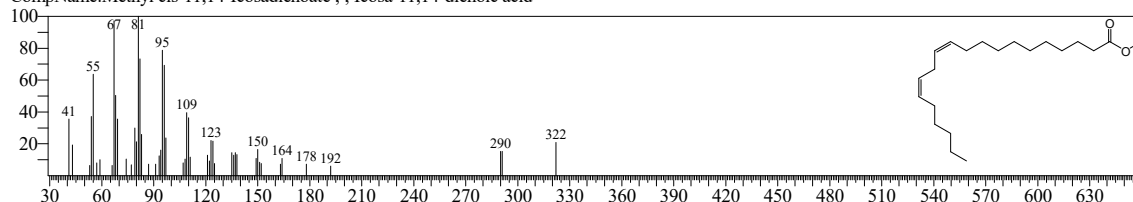

Hit#:5 Entry:11 Library:FA\_ME\_SP2560\_EI\_V3.lib

SI:52 Formula:C16H30O2 CAS:84743-29-3 MolWeight:254 RetIndex:2388

CompName:Methyl cis-10-pentadecenoate ; (Z)-pentadec-10-enoic acid

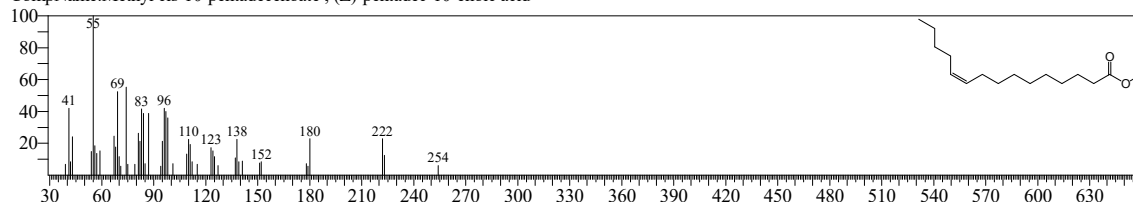

# TNAU

<< Target >>

Line#:4 R.Time:13.390(Scan#:1679) MassPeaks:347

RawMode:Averaged 13.385-13.395(1678-1680) BasePeak:155.10(5941)

BG Mode:Calc. from Peak Group 1 - Event 1 Q3 Scan

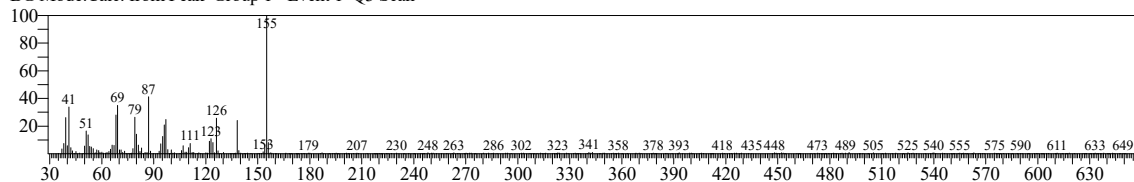

Hit#:1 Entry:34 Library:FA\_ME\_SP2560\_EI\_V3.lib

SI:53 Formula:C23H42O2 CAS:7370-49-2 MolWeight:350 RetIndex:3169

CompName:Methyl cis-13,16-Docosadienate ; (13Z,16E)-docosa-13,16-dienoic acid

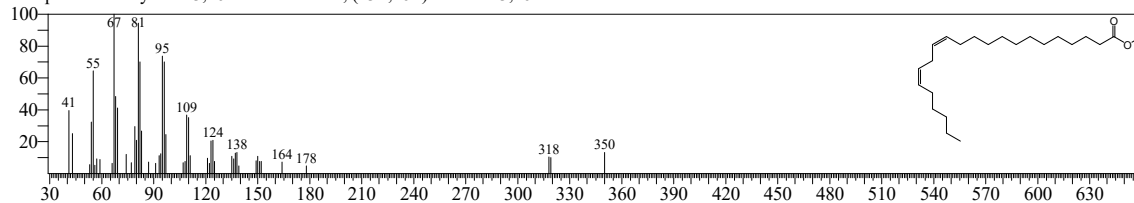

Hit#:2 Entry:21 Library:FA\_ME\_SP2560\_EI\_V3.lib

SI:52 Formula:C19H34O2 CAS:60-33-3 MolWeight:294 RetIndex:2775

CompName:Methyl linoleate ; Octadeca-9,12-dienoic acid

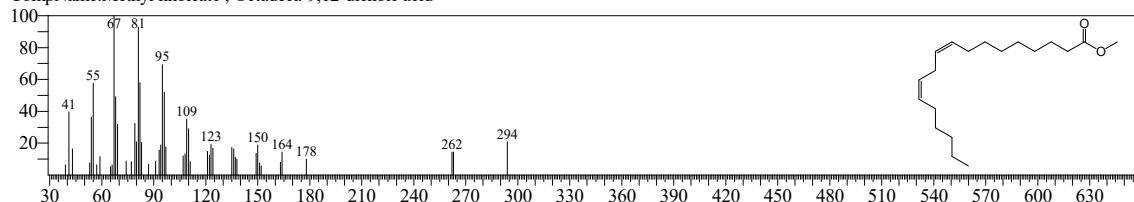

Hit#:3 Entry:20 Library:FA\_ME\_SP2560\_EI\_V3.lib

SI:51 Formula:C19H34O2 CAS:506-21-8 MolWeight:294 RetIndex:2727

CompName:Methyl linolelaidate ; (9E,12E)-octadeca-9,12-dienoic acid

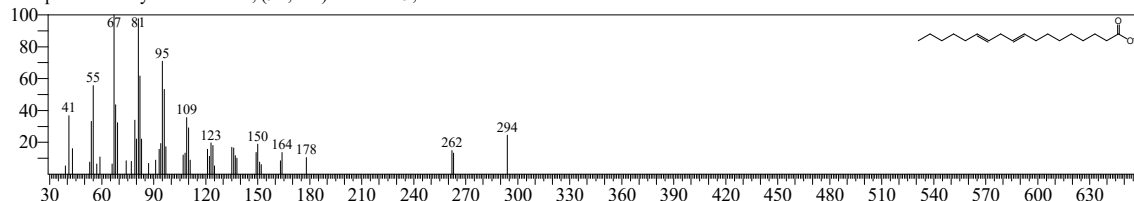

Hit#:4 Entry:11 Library:FA\_ME\_SP2560\_EI\_V3.lib

SI:51 Formula:C16H30O2 CAS:84743-29-3 MolWeight:254 RetIndex:2388

CompName:Methyl cis-10-pentadecenoate ; (Z)-pentadec-10-enoic acid

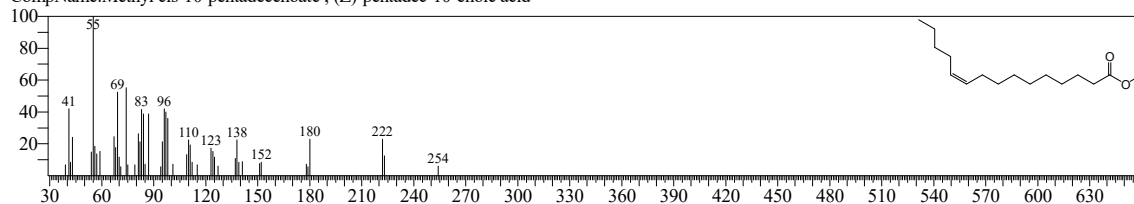

Hit#:5 Entry:27 Library:FA\_ME\_SP2560\_EI\_V3.lib

SI:51 Formula:C21H38O2 CAS:2091-39-6 MolWeight:322 RetIndex:2973

CompName:Methyl cis-11,14-Icosadienoate ; ; Icosa-11,14-dienoic acid

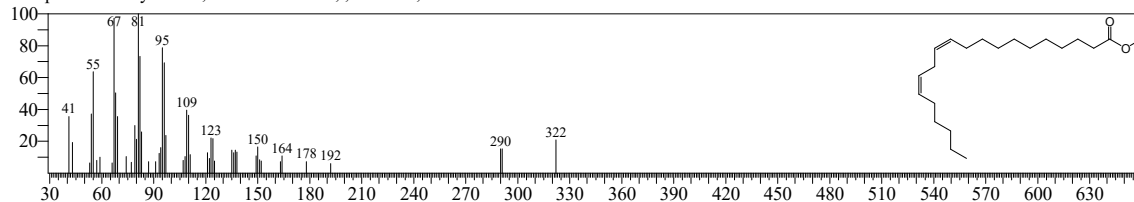

# TNAU

<< Target >>

Line#:5 R.Time:13.810(Scan#:1763) MassPeaks:340

RawMode:Averaged 13.805-13.815(1762-1764) BasePeak:221.10(2228)

BG Mode:Calc. from Peak Group 1 - Event 1 Q3 Scan

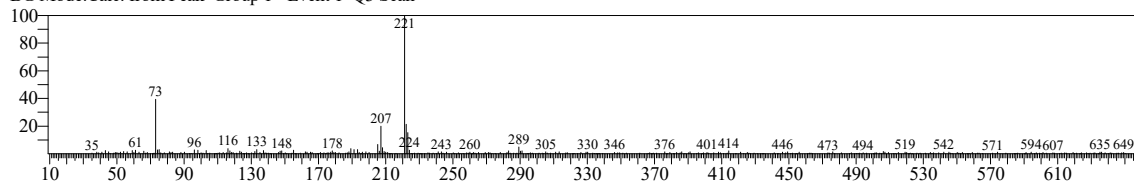

Hit#:1 Entry:28950 Library:NIST20R.lib

SI:81 Formula:C8H24O2Si3 CAS:107-51-7 MolWeight:236 RetIndex:698

CompName:Trisiloxane, octamethyl- \$\$ Octamethyltrisiloxane \$\$ Silane, dimethylbis(trimethylsiloxy)- \$\$ 1,1,1,3,3,5,5,5-Octamethyltrisiloxane \$\$ [(CH3)3

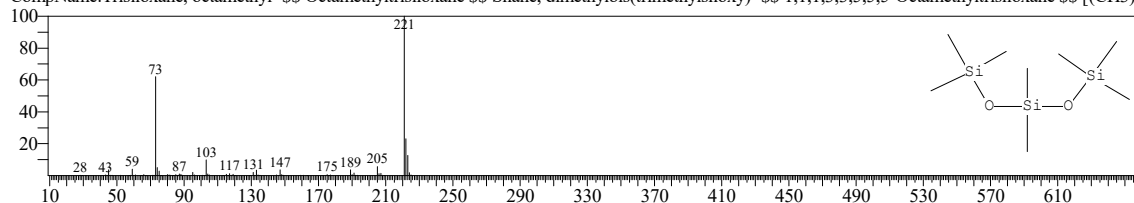

Hit#:2 Entry:186590 Library:NIST20M1.lib

SI:75 Formula:C14H36O2Si3 CAS:0-00-0 MolWeight:320 RetIndex:1126

CompName:1,3,5-Trisiloxane, 1,1,3,3,5,5-hexamethyl-1,5-di(tert.butyl)-

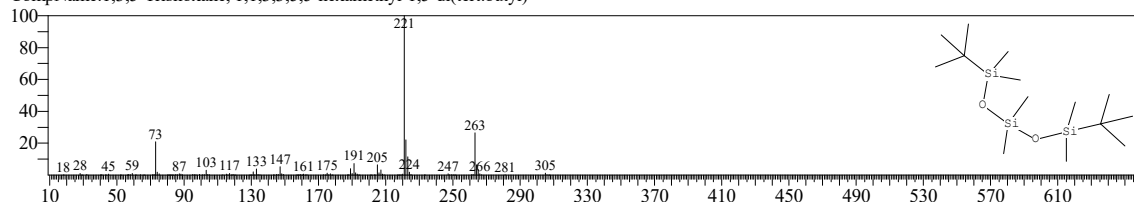

Hit#:3 Entry:33791 Library:NIST20R.lib

SI:74 Formula:C9H27BO3Si3 CAS:4325-85-3 MolWeight:278 RetIndex:0

CompName:Boric acid, 3TMS derivative \$\$ Tris(trimethylsilyl)borate \$\$ Silanol, trimethyl-, triester with boric acid (H3BO3) \$\$ Borane, tris(trimethylsiloxy

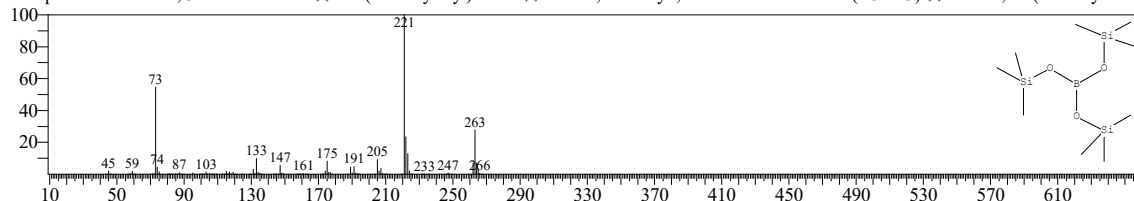

Hit#:4 Entry:186586 Library:NIST20M1.lib

SI:74 Formula:C14H32O2SSi2 CAS:82112-29-6 MolWeight:320 RetIndex:1482

CompName:Thioglycolic acid, S-(tert-butyl)dimethylsilyl-, tert-butyl)dimethylsilyl ester

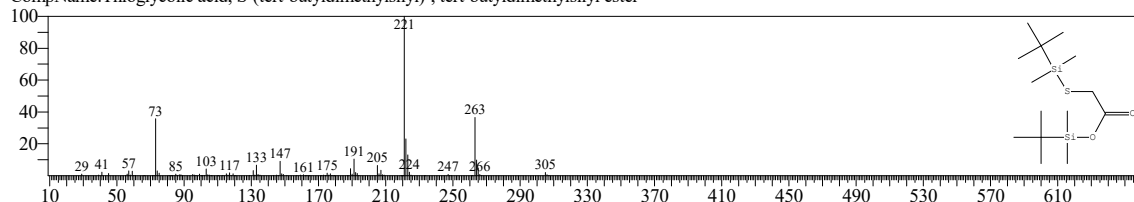

Hit#:5 Entry:155460 Library:NIST20M1.lib

SI:72 Formula:C10H30O2Si4 CAS:4342-25-0 MolWeight:294 RetIndex:807

CompName:3,6-Dioxa-2,4,5,7-tetrasilaoctane, 2,2,4,4,5,5,7,7-octamethyl- \$\$ 2,2,4,4,5,5,7,7-Octamethyl-3,6-dioxa-2,4,5,7-tetrasilaoctane #

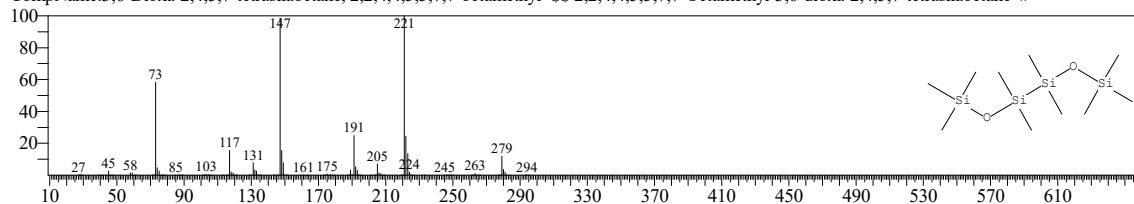

# TNAU

<< Target >>

Line#6 R.Time:18.490(Scan#:2699) MassPeaks:404

RawMode:Averaged 18.485-18.495(2698-2700) BasePeak:191.15(1585)

BG Mode:Calc. from Peak Group 1 - Event 1 Q3 Scan

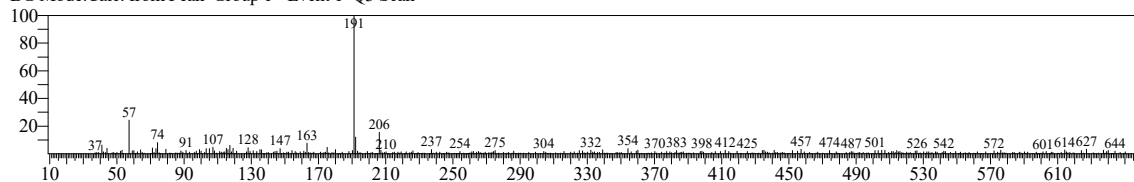

Hit#1 Entry:24086 Library:NIST20R.lib

SI:77 Formula:C14H22O CAS:96-76-4 MolWeight:206 RetIndex:1555

CompName:2,4-Di-tert-butylphenol \$\$ Phenol, 2,4-bis(1,1-dimethylethyl)- \$\$ Phenol, 2,4-di-tert-butyl- \$\$ 2,4-di-t-Butylphenol \$\$ 1-Hydroxy-2,4-di-tert-bu

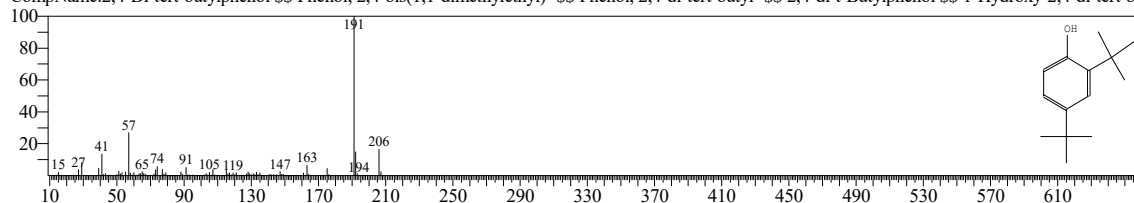

Hit#2 Entry:24098 Library:NIST20R.lib

SI:75 Formula:C14H22O CAS:5875-45-6 MolWeight:206 RetIndex:1555

CompName:Phenol, 2,5-bis(1,1-dimethylethyl)- \$\$ Phenol, 2,5-di-tert-butyl- \$\$ 2,5-Di-tert-butylphenol \$\$ 2,5-bis(1,1-Dimethylethyl)phenol

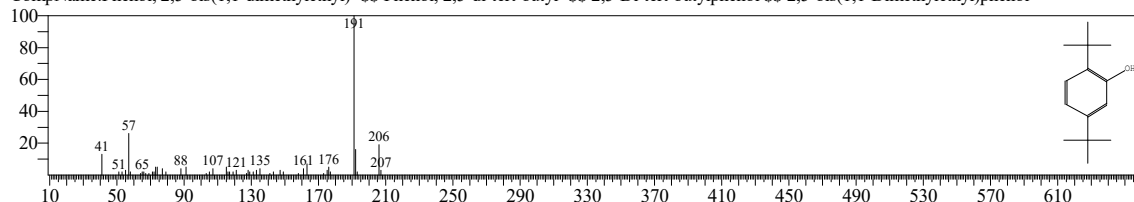

Hit#3 Entry:59031 Library:NIST20M1.lib

SI:74 Formula:C14H22O CAS:128-39-2 MolWeight:206 RetIndex:1555

CompName:Phenol, 2,6-bis(1,1-dimethylethyl)- \$\$ Phenol, 2,6-di-tert-butyl- \$\$ 2,6-Bis(tert-butyl)phenol \$\$ 2,6-Bis(1,1-dimethylethyl)phenol \$\$ 2,6-Di-ter

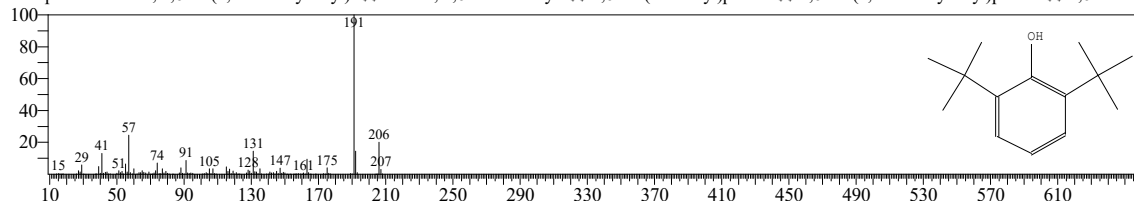

Hit#4 Entry:24110 Library:NIST20R.lib

SI:74 Formula:C14H22O CAS:1138-52-9 MolWeight:206 RetIndex:1555

CompName:Phenol, 3,5-bis(1,1-dimethylethyl)- \$\$ Phenol, 3,5-di-tert-butyl- \$\$ 3,5-Di-tert-butylphenol \$\$ Phenol, 3,5-bis(t-butyl) \$\$ 3,5-Di-t-butylphenol \$

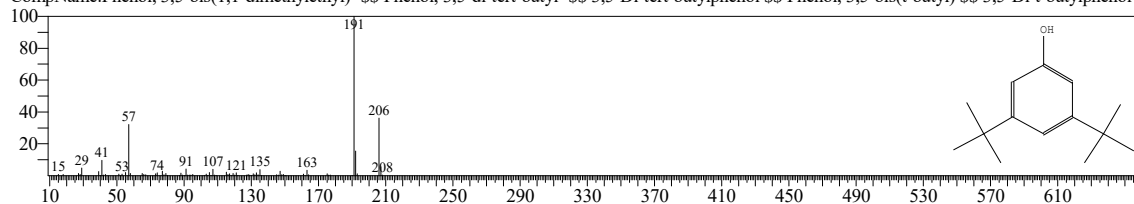

Hit#5 Entry:170993 Library:NIST20M1.lib

SI:73 Formula:C19H30O3 CAS:166273-38-7 MolWeight:306 RetIndex:2255

CompName:Pentanoic acid, 5-hydroxy-, 2,4-di-t-butylphenyl esters \$\$ 2,4-Di-tert-butylphenyl 5-hydroxypentanoate #

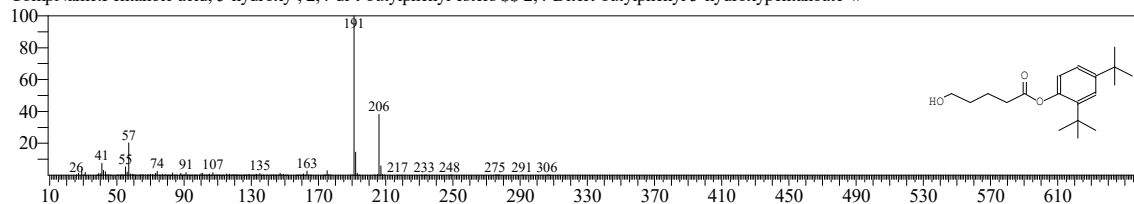

# TNAU

<< Target >>

Line#:7 R.Time:19.190(Scan#:2839) MassPeaks:341

RawMode:Averaged 19.185-19.195(2838-2840) BasePeak:263.20(7056)

BG Mode:Calc. from Peak Group 1 - Event 1 Q3 Scan

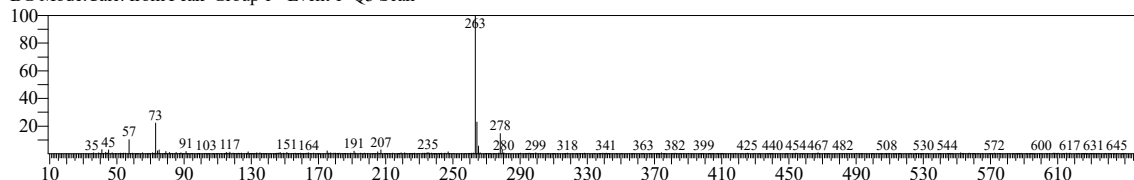

Hit#:1 Entry:33874 Library:NIST20R.lib

SI:92 Formula:C<sub>17</sub>H<sub>30</sub>O<sub>2</sub>Si CAS:53925-65-8 MolWeight:278 RetIndex:1632

CompName:2,4-Di-tert-butylphenoxytrimethylsilane \$ \$ Benzene, 2,4-bis(1,1-dimethylethyl)-1-[(trimethylsilyl)oxy]- \$ \$ Silane, [2,4-bis(1,1-dimethylethyl)ph

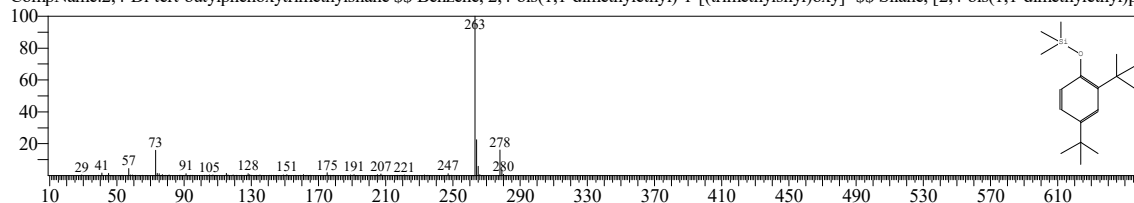

Hit#:2 Entry:33871 Library:NIST20R.lib

SI:84 Formula:C<sub>17</sub>H<sub>30</sub>O<sub>2</sub>Si CAS:10416-73-6 MolWeight:278 RetIndex:1632

CompName:2,6-Bis(tert-butyl)phenol, TMS derivative \$ \$ Trimethyl(2,6 ditert-butylphenoxy)silane \$ \$ (2,6-Ditert-butylphenoxy)(trimethyl)silane #

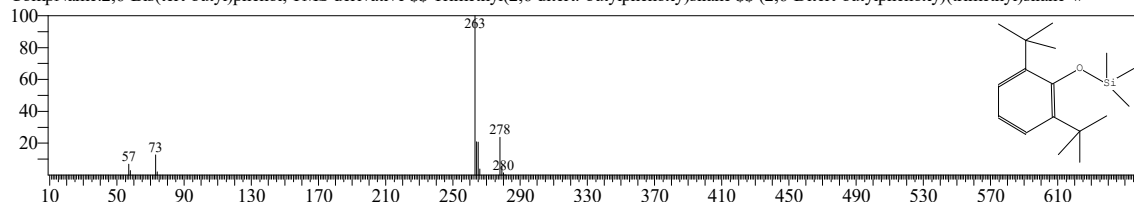

Hit#:3 Entry:136557 Library:NIST20M1.lib

SI:83 Formula:C<sub>12</sub>H<sub>22</sub>N<sub>4</sub>Si<sub>2</sub> CAS:0-00-0 MolWeight:278 RetIndex:1703

CompName:3-Deazaadenine, 2TMS \$ \$ 3-Deazaadenine, N,N'-bis-TMS \$ \$ 1H-Imidazo[4,5-c]pyridin-4-amine, N,N'-bis-TMS

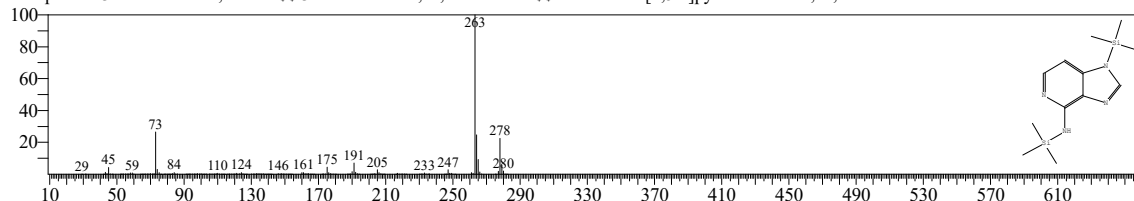

Hit#:4 Entry:137020 Library:NIST20M1.lib

SI:79 Formula:C<sub>15</sub>H<sub>22</sub>O<sub>3</sub>Si CAS:0-00-0 MolWeight:278 RetIndex:1736

CompName:6-Methoxy-2,2-dimethyl-2,3-dihydro-4H-chromen-4-one, TMS \$ \$ 6-Methoxy-2,2-dimethyl-chroman-4-one, O-trimethylsilyl- \$ \$ 4H-1-Benzopy

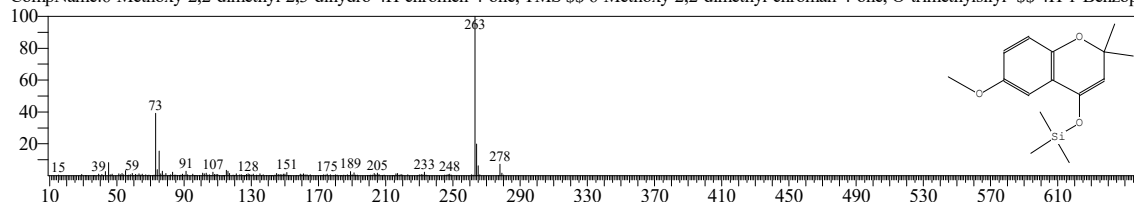

Hit#:5 Entry:136556 Library:NIST20M1.lib

SI:79 Formula:C<sub>12</sub>H<sub>22</sub>N<sub>4</sub>Si<sub>2</sub> CAS:0-00-0 MolWeight:278 RetIndex:1606

CompName:1H,1'H-2,2'-Biimidazole, 2TMS \$ \$ 1H,1'H-2,2'-Biimidazole, N,N'-bis-TMS \$ \$ 1H,1'H-[2,2']Biimidazolyl, 2TMS \$ \$ 2,2'-Bi-1H-imidazole, 2TMS

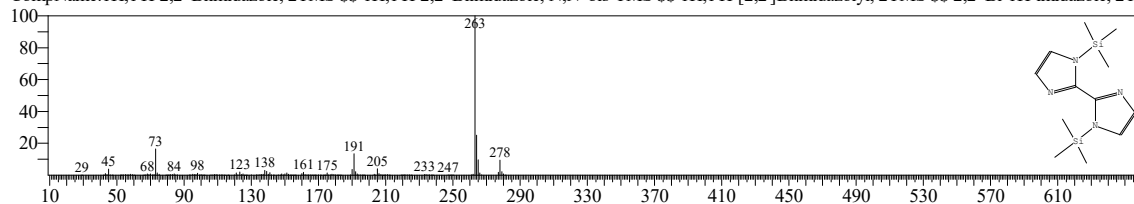



# TNAU

<< Target >>

Line# 8 R.Time: 28.295 (Scan#: 4660) MassPeaks: 342

RawMode: Averaged 28.290-28.300 (4659-4661) BasePeak: 73.05 (2693)

BG Mode: Calc. from Peak Group 1 - Event 1 Q3 Scan

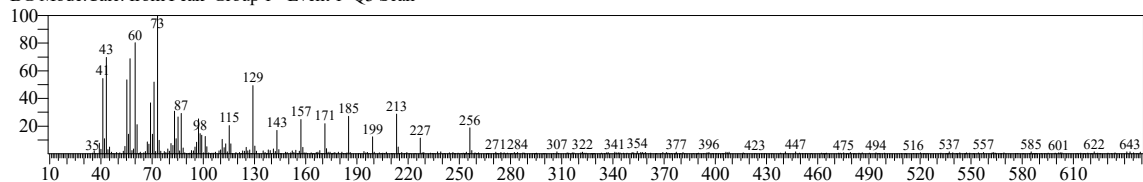

Hit#: 1 Entry: 31600 Library: NIST20R.lib

SI: 95 Formula: C<sub>16</sub>H<sub>32</sub>O<sub>2</sub> CAS: 57-10-3 MolWeight: 256 RetIndex: 1968

CompName: n-Hexadecanoic acid \$ Hexadecanoic acid \$ n-Hexadecic acid \$ Palmitic acid \$ Pentadecanecarboxylic acid \$ 1-Pentadecanecarboxylic

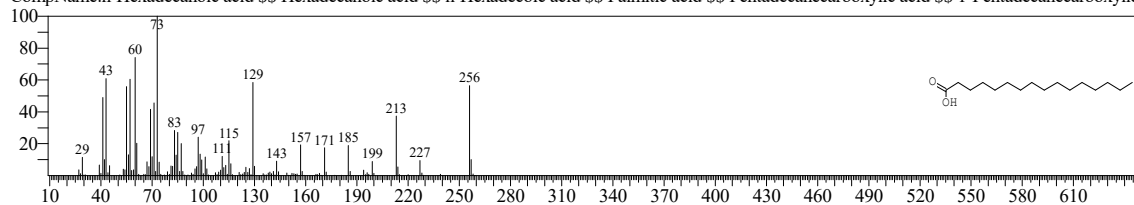

Hit#: 2 Entry: 29890 Library: NIST20R.lib

SI: 92 Formula: C<sub>15</sub>H<sub>30</sub>O<sub>2</sub> CAS: 1002-84-2 MolWeight: 242 RetIndex: 1869

CompName: Pentadecanoic acid \$ Pentadecylic acid \$ n-Pentadecanoic acid \$ n-Pentadecylic acid

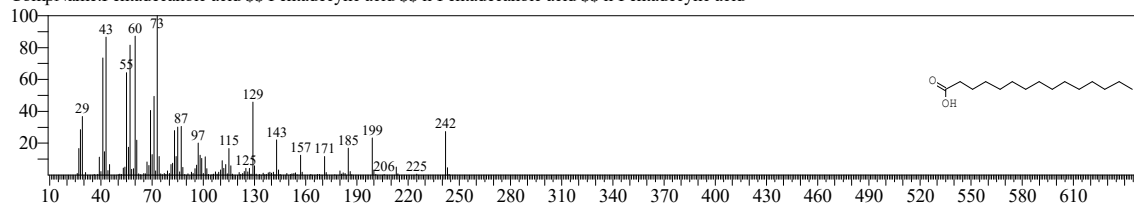

Hit#: 3 Entry: 44286 Library: NIST20M2.lib

SI: 91 Formula: C<sub>38</sub>H<sub>68</sub>O<sub>8</sub> CAS: 28474-90-0 MolWeight: 652 RetIndex: 4765

CompName: l-(+)-Ascorbic acid 2,6-dihexadecanoate

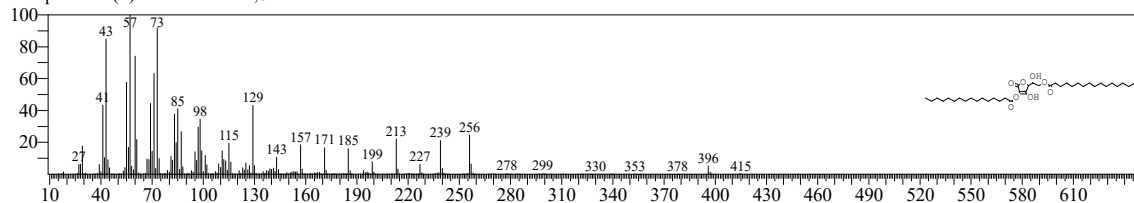

Hit#: 4 Entry: 25643 Library: NIST20R.lib

SI: 90 Formula: C<sub>13</sub>H<sub>26</sub>O<sub>2</sub> CAS: 638-53-9 MolWeight: 214 RetIndex: 1670

CompName: Tridecanoic acid \$ n-Tridecanoic acid \$ n-Tridecoic acid \$ Tridecylic acid

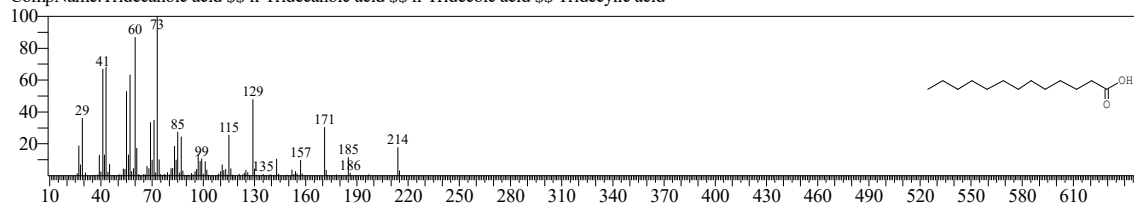

Hit#: 5 Entry: 144781 Library: NIST20M1.lib

SI: 90 Formula: C<sub>18</sub>H<sub>36</sub>O<sub>2</sub> CAS: 57-11-4 MolWeight: 284 RetIndex: 2167

CompName: Octadecanoic acid \$ Stearic acid \$ n-Octadecanoic acid \$ Humko Industriene R \$ Hydrofol Acid 150 \$ Hystrene S-97 \$ Hystrene T-70 \$

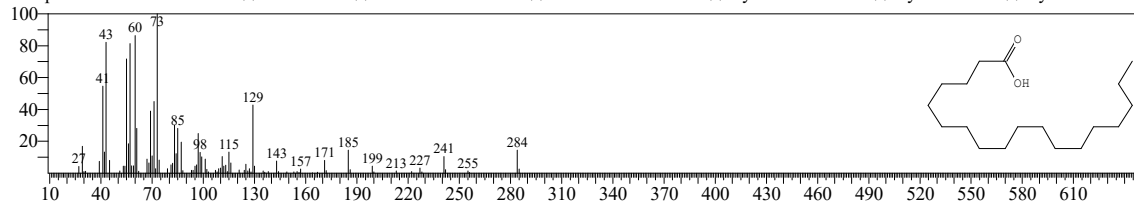

# TNAU

<< Target >>

Line#9 R.Time:29.585(Scan#:4918) MassPeaks:388

RawMode:Averaged 29.580-29.590(4917-4919) BasePeak:318.15(2809)

BG Mode:Calc. from Peak Group 1 - Event 1 Q3 Scan

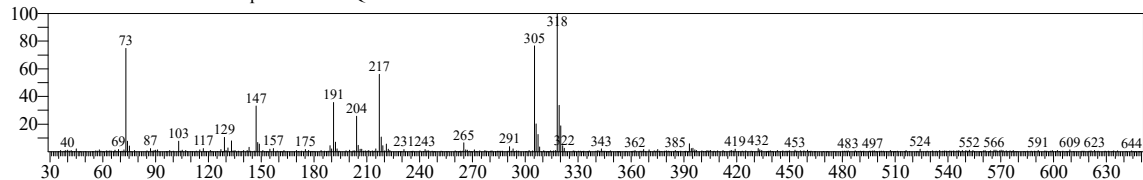

Hit#1 Entry:43144 Library:NIST20M2.lib

SI:87 Formula:C<sub>24</sub>H<sub>60</sub>O<sub>6</sub>Si<sub>6</sub> CAS:14251-18-4 MolWeight:612 RetIndex:2194

CompName:Scyllo-Inositol, 6TMS \$\$ Inositol, 1,2,3,4,5,6-hexakis-O-(trimethylsilyl)-, scyllo- \$\$ Trimethyl((2,3,4,5,6-pentakis[(trimethylsilyl)oxy]cyclohexyl)ox

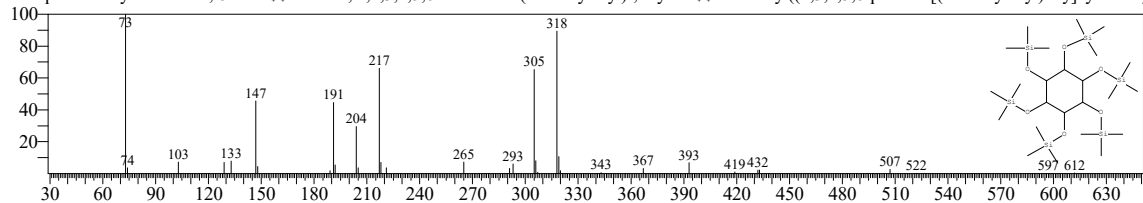

Hit#2 Entry:43552 Library:NIST20R.lib

SI:87 Formula:C<sub>24</sub>H<sub>60</sub>O<sub>6</sub>Si<sub>6</sub> CAS:2582-79-8 MolWeight:612 RetIndex:2194

CompName:Myo-Inositol, 6TMS \$\$ myo-Inositol, 1,2,3,4,5,6-hexakis-O-(trimethylsilyl)- \$\$ Inositol, 1,2,3,4,5,6-hexakis-O-(trimethylsilyl)-, myo- \$\$ Trime

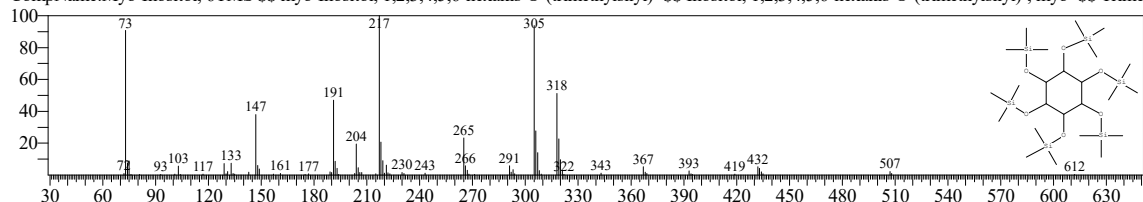

Hit#3 Entry:465 Library:OA\_TMS\_DB\_67min\_V3.lib

SI:86 Formula:C<sub>24</sub>H<sub>60</sub>O<sub>6</sub>Si<sub>6</sub> CAS:87-89-8 MolWeight:612 RetIndex:2132

CompName:Inositol-6TMS(2) ; cyclohexane-1,2,3,4,5,6-hexol

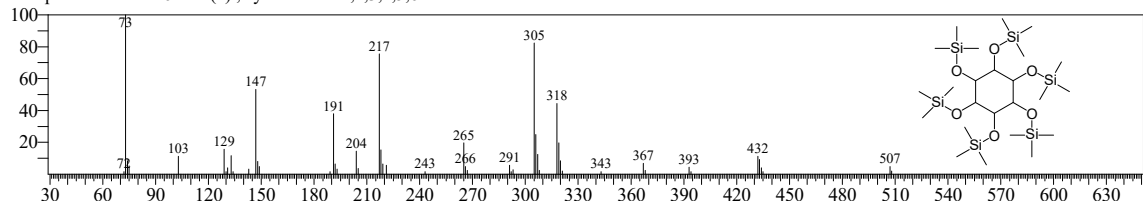

Hit#4 Entry:43145 Library:NIST20M2.lib

SI:79 Formula:C<sub>24</sub>H<sub>60</sub>O<sub>6</sub>Si<sub>6</sub> CAS:29412-26-8 MolWeight:612 RetIndex:2194

CompName:Muco-Inositol, 6TMS \$\$ Inositol, 1,2,3,4,5,6-hexakis-O-(trimethylsilyl)-, muco- \$\$ Trimethyl((2,3,4,5,6-pentakis[(trimethylsilyl)oxy]cyclohexyl)ox

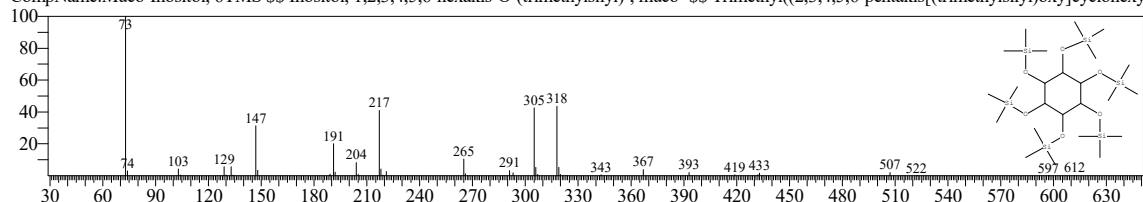

Hit#5 Entry:43146 Library:NIST20M2.lib

SI:79 Formula:C<sub>24</sub>H<sub>60</sub>O<sub>6</sub>Si<sub>6</sub> CAS:29267-01-4 MolWeight:612 RetIndex:2194

CompName:Inositol, epi-, 6TMS \$\$ Inositol, 1,2,3,4,5,6-hexakis-O-(trimethylsilyl)-, epi- \$\$ Trimethyl((2,3,4,5,6-pentakis[(trimethylsilyl)oxy]cyclohexyl)ox

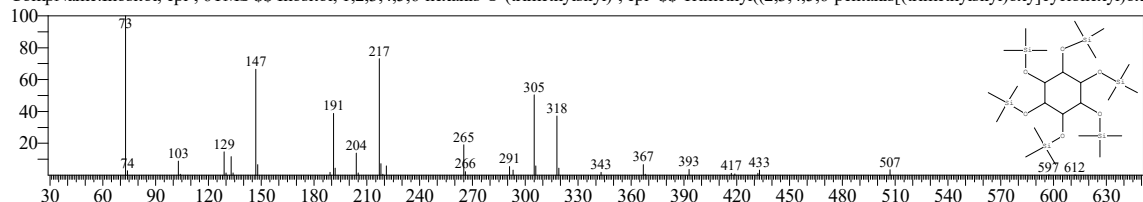

# TNAU

<< Target >>

Line#:10 R.Time:31.480(Scan#:5297) MassPeaks:359

RawMode:Averaged 31.475-31.485(5296-5298) BasePeak:67.10(2276)

BG Mode:Calc. from Peak Group 1 - Event 1 Q3 Scan

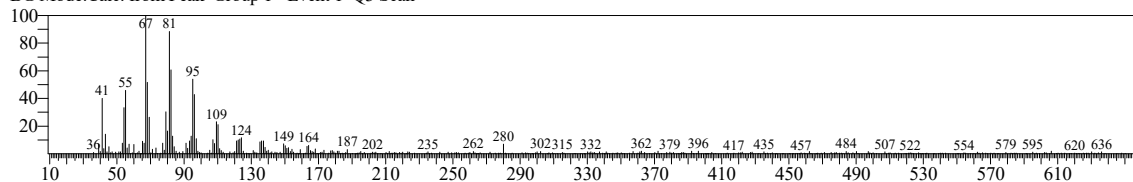

Hit#:1 Entry:139646 Library:NIST20M1.lib

SI:94 Formula:C18H32O2 CAS:2420-56-6 MolWeight:280 RetIndex:2183

CompName:10E,12Z-Octadecadienoic acid

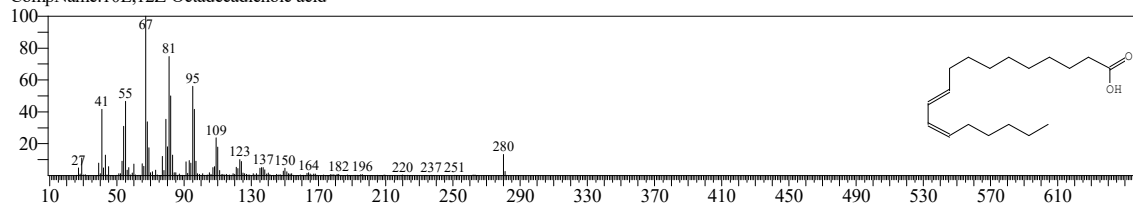

Hit#:2 Entry:139651 Library:NIST20M1.lib

SI:94 Formula:C18H32O2 CAS:544-71-8 MolWeight:280 RetIndex:2183

CompName:(9E,11E)-Octadecadienoic acid

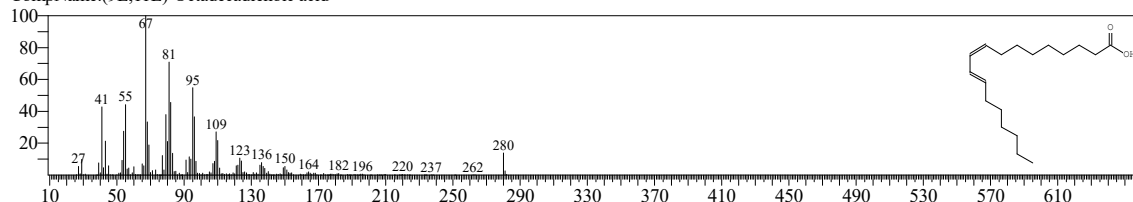

Hit#:3 Entry:34035 Library:NIST20R.lib

SI:93 Formula:C18H32O2 CAS:60-33-3 MolWeight:280 RetIndex:2183

CompName:9,12-Octadecadienoic acid (Z,Z)- \$\$ cis-9,cis-12-Octadecadienoic acid \$\$ cis,cis-Linoleic acid \$\$ Grape seed oil \$\$ Linoleic \$\$ Linoleic acid \$

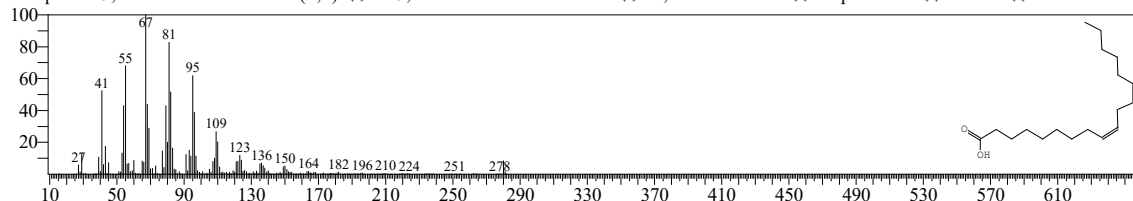

Hit#:4 Entry:139661 Library:NIST20M1.lib

SI:92 Formula:C18H32O2 CAS:506-21-8 MolWeight:280 RetIndex:2183

CompName:Linoelaidic acid

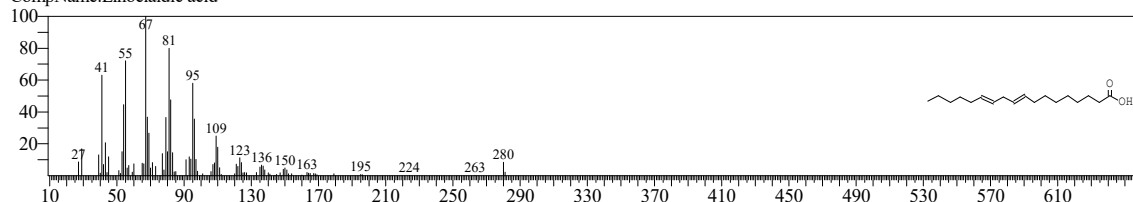

Hit#:5 Entry:173215 Library:NIST20M1.lib

SI:92 Formula:C20H36O2 CAS:2091-39-6 MolWeight:308 RetIndex:2382

CompName:11,14-Eicosadienoic acid

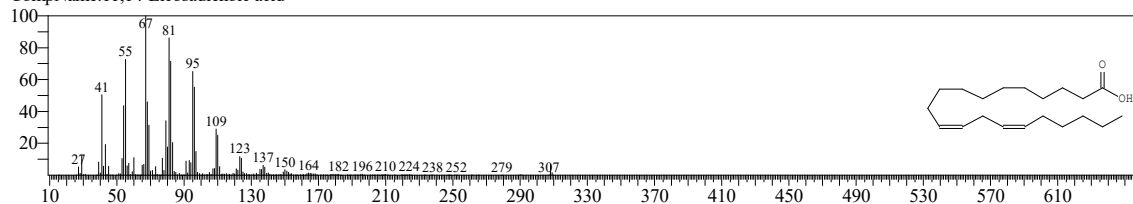

# TNAU

<< Target >>

Line#:11 R.Time:31.580(Scan#:5317) MassPeaks:406

RawMode:Averaged 31.575-31.585(5316-5318) BasePeak:79.10(1254)

BG Mode:Calc. from Peak Group 1 - Event 1 Q3 Scan

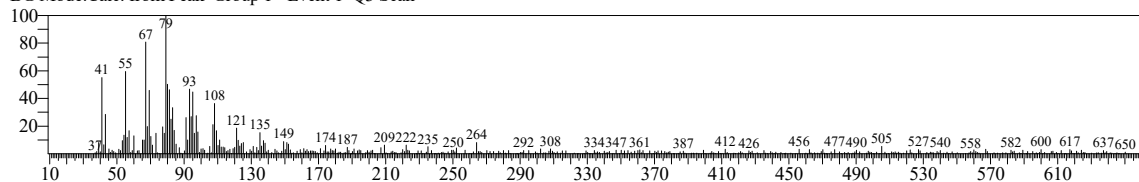

Hit#:1 Entry:87848 Library:NIST20M1.lib

SI:87 Formula:C16H26O CAS:56797-43-4 MolWeight:234 RetIndex:1824

CompName:cis,cis,cis-7,10,13-Hexadecatrienal \$\$ (7Z,10Z,13Z)-7,10,13-Hexadecatrienal #

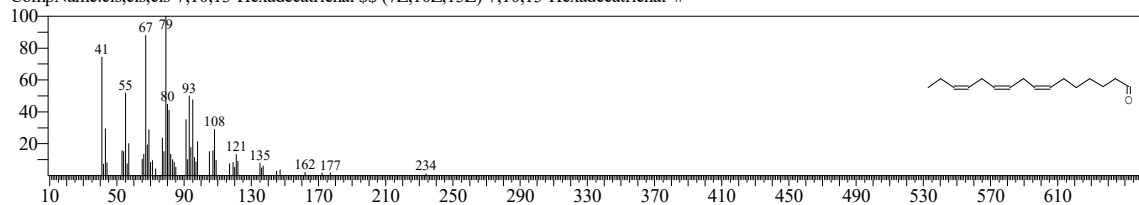

Hit#:2 Entry:35226 Library:NIST20R.lib

SI:85 Formula:C19H32O2 CAS:301-00-8 MolWeight:292 RetIndex:2101

CompName:9,12,15-Octadecatrienoic acid, methyl ester, (Z,Z,Z)- \$\$ Linolenic acid, methyl ester \$\$ Methyl all-cis-9,12,15-octadecatrienoate \$\$ Methyl lino

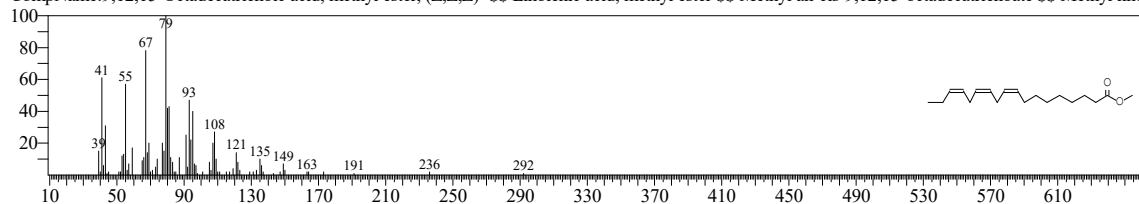

Hit#:3 Entry:137464 Library:NIST20M1.lib

SI:85 Formula:C18H30O2 CAS:463-40-1 MolWeight:278 RetIndex:2191

CompName:9,12,15-Octadecatrienoic acid, (Z,Z,Z)- \$\$ Linolenic acid \$\$ .alpha.-Linolenic acid \$\$ All-cis-9,12,15-Octadecatrienoic acid \$\$ cis,cis,cis-9,12,1

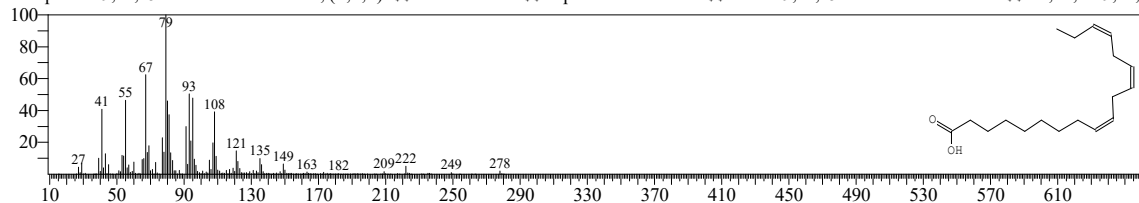

Hit#:4 Entry:32465 Library:NIST20R.lib

SI:84 Formula:C18H32O CAS:506-44-5 MolWeight:264 RetIndex:2077

CompName:9,12,15-Octadecatrien-1-ol, (Z,Z,Z)- \$\$ (9E,12E,15E)-9,12,15-Octadecatrien-1-ol # \$\$ (Z,Z,Z)-9,12,15-Octadecatrien-1-ol

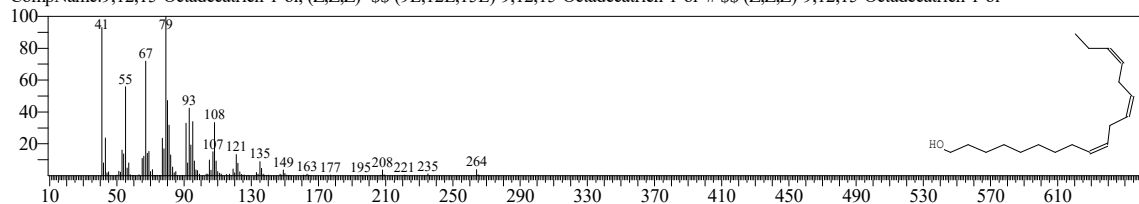

Hit#:5 Entry:171074 Library:NIST20M1.lib

SI:84 Formula:C20H34O2 CAS:1783-84-2 MolWeight:306 RetIndex:2390

CompName:8,11,14-Eicosatrienoic acid, (Z,Z,Z)- \$\$ cis-8,11,14-Eicosatrienoic Acid \$\$ Dihomo-.gamma.-linolenic acid \$\$ (8E,11E,14E)-8,11,14-Icosatrien

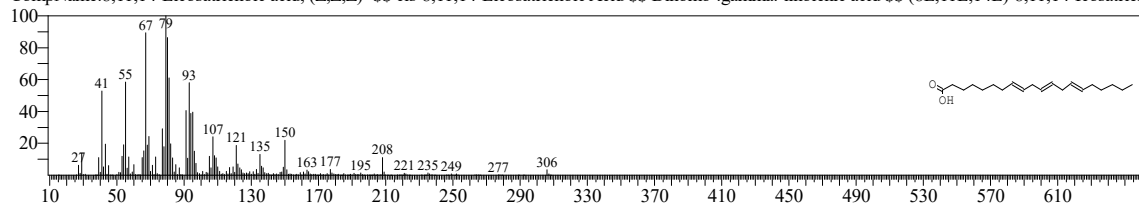

# TNAU

<< Target >>

Line#:12 R.Time:39.175(Scan#:6836) MassPeaks:376

RawMode:Averaged 39.170-39.180(6835-6837) BasePeak:117.05(1071)

BG Mode:Calc. from Peak Group 1 - Event 1 Q3 Scan

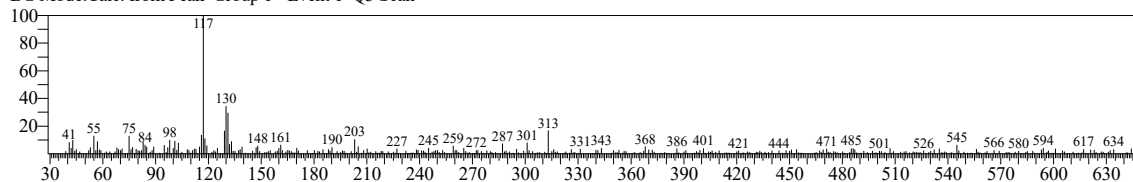

Hit#:1 Entry:446 Library:OA\_TMS\_DB5\_67min\_V3.lib

SI:59 Formula:C19H40O2Si CAS:57-10-3 MolWeight:328 RetIndex:2046

CompName:Palmitic acid-TMS ; hexadecanoic acid

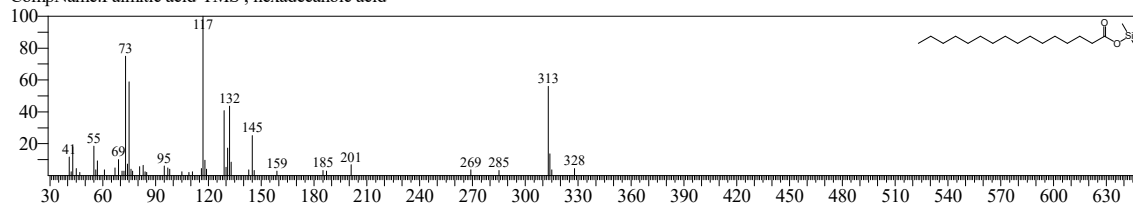

Hit#:2 Entry:539 Library:OA\_TMS\_DB5\_67min\_V3.lib

SI:57 Formula:C27H60O3Si2 CAS:544-62-7 MolWeight:488 RetIndex:2684

CompName:Batyl alcohol-TMS ; 3-octadecoxyp propane-1,2-diol

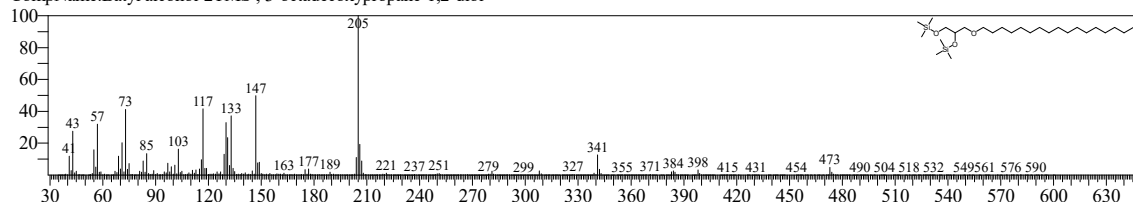

Hit#:3 Entry:491 Library:OA\_TMS\_DB5\_67min\_V3.lib

SI:55 Formula:C21H44O2Si CAS:57-11-4 MolWeight:356 RetIndex:2244

CompName:Stearic acid-TMS ; octadecanoic acid

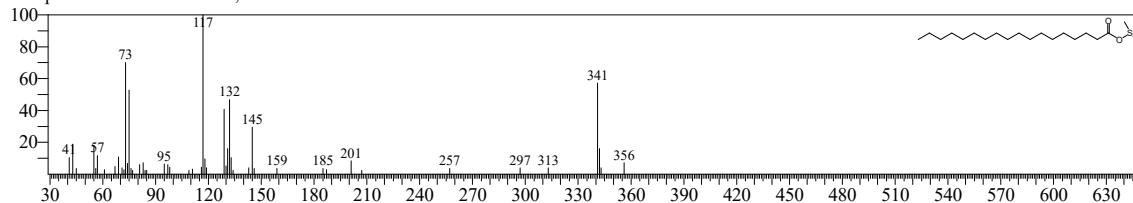

Hit#:4 Entry:223 Library:OA\_TMS\_DB5\_67min\_V3.lib

SI:54 Formula:C15H32O2Si CAS:143-07-7 MolWeight:272 RetIndex:1653

CompName:Lauric acid-TMS ; dodecanoic acid

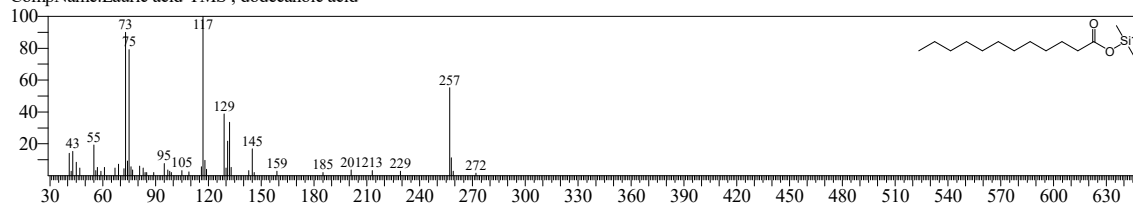

Hit#:5 Entry:287 Library:OA\_TMS\_DB5\_67min\_V3.lib

SI:54 Formula:C19H47NO5Si4 CAS:3615-37-0 MolWeight:481 RetIndex:1768

CompName:Fucose-meto-4TMS(2) ; (2S,3R,4S,5R,6R)-6-methyloxane-2,3,4,5-tetrol

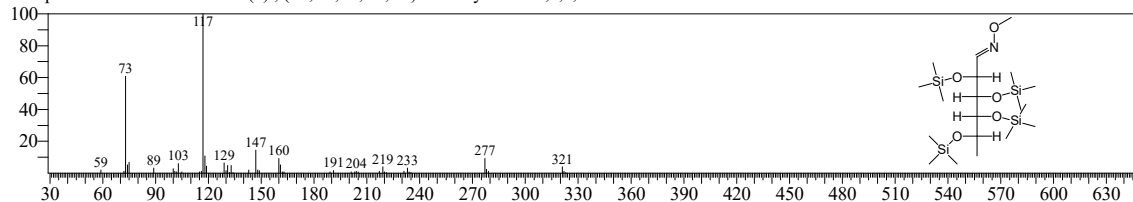

# TNAU

<< Target >>

Line#:13 R.Time:39.580(Scan#:6917) MassPeaks:384

RawMode:Averaged 39.575-39.585(6916-6918) BasePeak:41.00(47)

BG Mode:Calc. from Peak Group 1 - Event 1 Q3 Scan

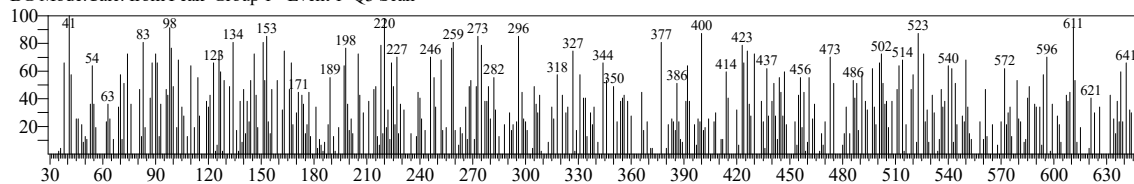

Hit#:1 Entry:477 Library:OA TMS DB5 67min V3.lib

SI:14 Formula:C21H46OSi CAS:112-92-5 MolWeight:342 RetIndex:2156

CompName:Octadecanol-TMS ; octadecan-1-ol

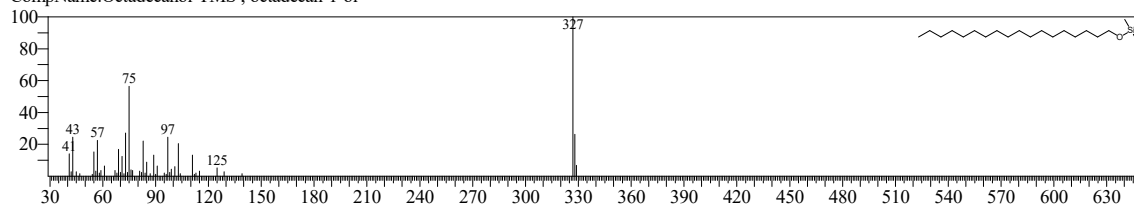

Hit#:2 Entry:339 Library:OA TMS DB5 67min V3.lib

SI:13 Formula:C13H18O3Si CAS:458-36-6 MolWeight:250 RetIndex:1859

CompName:Coniferyl aldehyde-TMS ; (E)-3-(4-hydroxy-3-methoxyphenyl)prop-2-enal

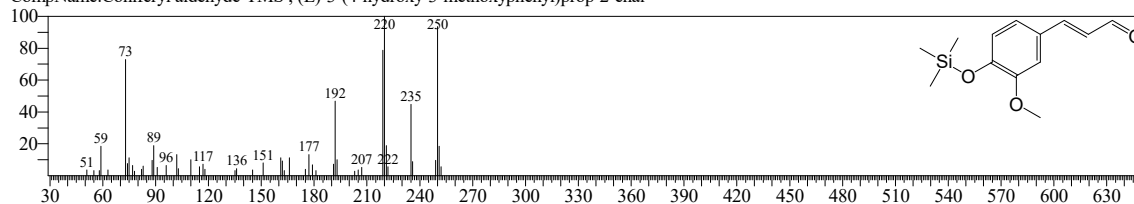

Hit#:3 Entry:539 Library:OA TMS DB5 67min V3.lib

SI:12 Formula:C27H60O3Si2 CAS:544-62-7 MolWeight:488 RetIndex:2684

CompName:Batyl alcohol-2TMS ; 3-octadecoxypropane-1,2-diol

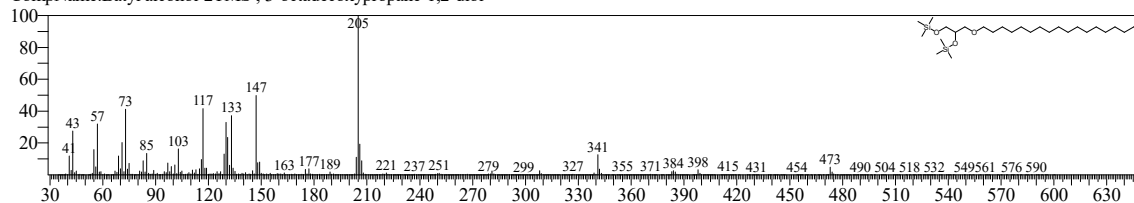

Hit#:4 Entry:2 Library:FA\_ME\_SP2560 EI V3.lib

SI:11 Formula:C7H14O2 CAS:142-62-1 MolWeight:130 RetIndex:1332

CompName:Methyl caproate ; Hexanoic acid

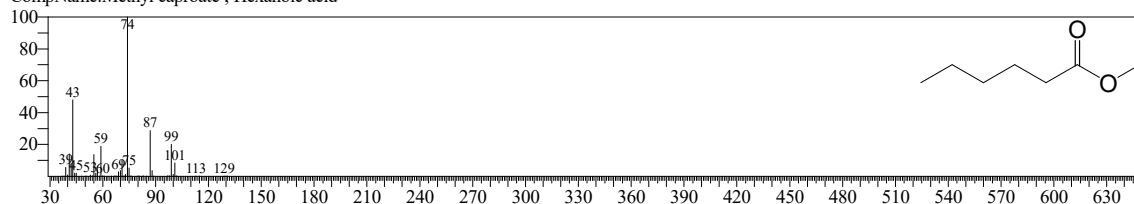

Hit#:5 Entry:22 Library:FA\_ME\_SP2560 EI V3.lib

SI:11 Formula:C21H42O2 CAS:506-30-9 MolWeight:326 RetIndex:2809

CompName:Methyl arachisate ; Icosanoic acid

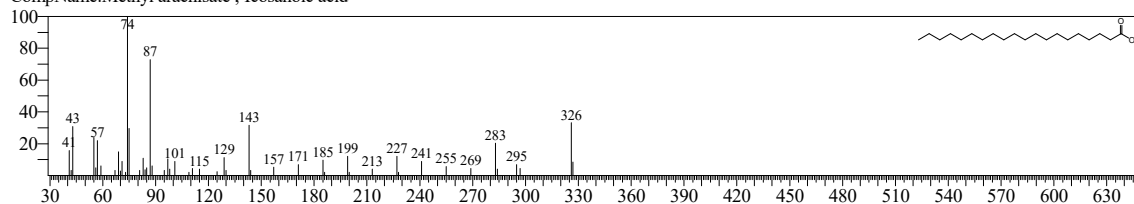

Supplement: Supplementary file 68 [file supplementary]
