# Supplementary material for: Comparative Metabolomics Profiling Reveals Key Metabolites and Associated Pathways Regulating Tuber Dormancy in White Yam (<em>Dioscorea rotundata</em>)
Source: Preprints.org preprint supplement (doi:10.20944/preprints202303.0378.v1), 2023-03-21

# TNAU

## Sample Information

Analyzed by : Admin  
 Analyzed : 04-Aug-22 10:06:35 PM  
 Sample Type : Unknown  
 Level # : 1  
 Sample Name : C87-2  
 Sample ID : C87-2  
 IS Amount : [1]=1  
 Sample Amount : 1  
 Dilution Factor : 1  
 Vial # : 9  
 Injection Volume : 1.00  
 Data File : D:\GCMS-8040NX\Aug 2022\Users\04.08.2022\Data files\04082022-009.qgd  
 Org Data File : D:\GCMS-8040NX\Aug 2022\Users\04.08.2022\Data files\04082022-009.qgd  
 Method File : D:\GCMS-8040NX\Aug 2022\Users\04.08.2022\Method file\27072022\_methodfile.qgm  
 Org Method File : D:\GCMS-8040NX\Aug 2022\Users\04.08.2022\Method file\27072022\_methodfile.qgm  
 Report File :  
 Tuning File : D:\GCMS-8040NX\Aug 2022\Tuning Data\TUNING 04082022.qgt  
 [Comment]  
 Jerry samples  
 Modified by : Admin  
 Modified : 05-Aug-22 4:25:50 PM

Chromatogram C87-2 D:\GCMS-8040NX\Aug 2022\Users\04.08.2022\Data files\04082022-009.qgd

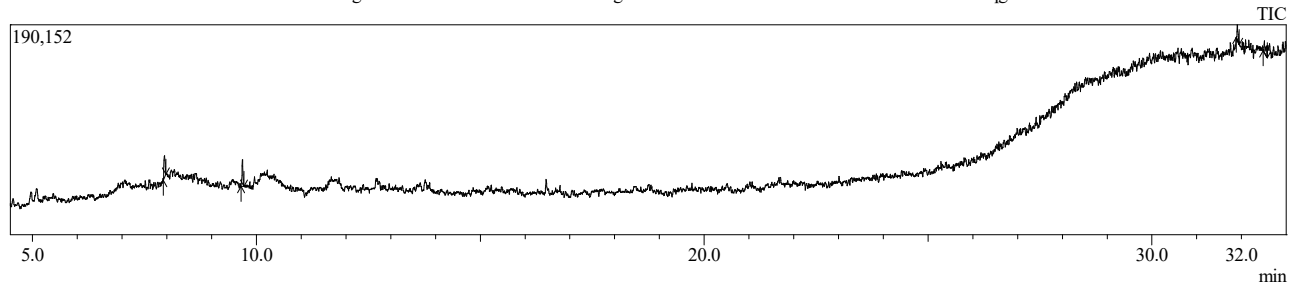

Peak Report TIC

| Peak# | R.Time | Area   | Area%  | Height | Height% | A/H  | Similarity | Name          |
|-------|--------|--------|--------|--------|---------|------|------------|---------------|
| 1     | 7.945  | 39250  | 30.92  | 20034  | 29.28   | 1.96 | 86         | Decane        |
| 2     | 9.687  | 37455  | 29.50  | 24019  | 35.10   | 1.56 | 87         | Dodecane      |
| 3     | 31.907 | 20924  | 16.48  | 13458  | 19.67   | 1.55 | 33         | Inosine-4TMS  |
| 4     | 32.510 | 29324  | 23.10  | 10914  | 15.95   | 2.69 | 28         | Lactitol-9TMS |
|       |        | 126953 | 100.00 | 68425  | 100.00  |      |            |               |

Library

# TNAU

<< Target >>

Line#:1 R.Time:7.945(Scan#:690) MassPeaks:284

RawMode:Averaged 7.940-7.950(689-691) BasePeak:57.05(5390)

BG Mode:Calc. from Peak Group 1 - Event 1 Q3 Scan

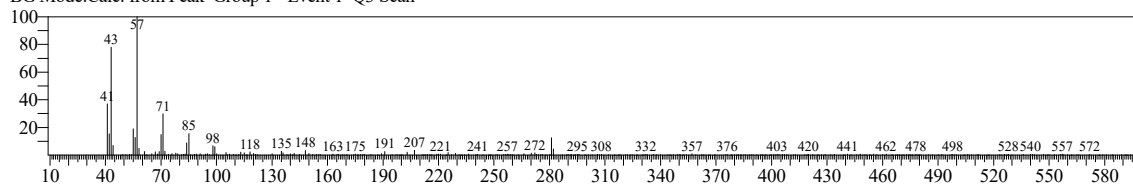

Hit#:1 Entry:9444 Library:NIST20R.lib

SI:86 Formula:C10H22 CAS:124-18-5 MolWeight:142 RetIndex:1000

CompName:Decane \$\$ n-Decane \$\$ n-C10H22 \$\$ UN 2247

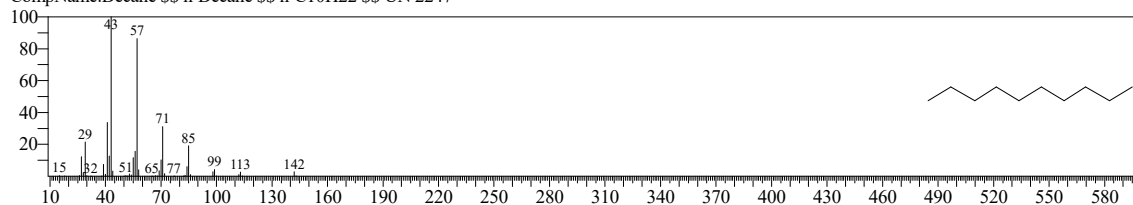

Hit#:2 Entry:9458 Library:NIST20R.lib

SI:86 Formula:C10H22 CAS:15869-86-0 MolWeight:142 RetIndex:951

CompName:Octane, 4-ethyl- \$\$ 4-EthylOctane

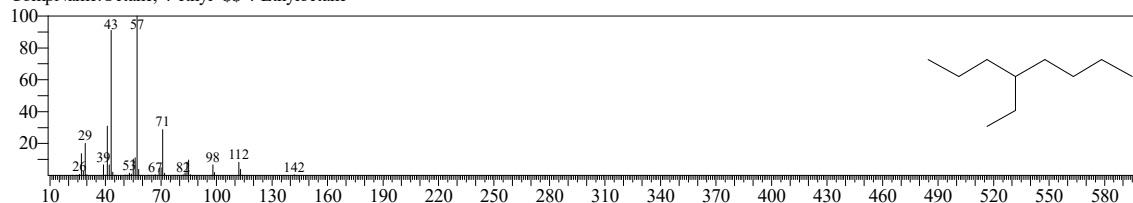

Hit#:3 Entry:21042 Library:NIST20M1.lib

SI:86 Formula:C11H24 CAS:1120-21-4 MolWeight:156 RetIndex:1100

CompName:Undecane \$\$ n-Undecane \$\$ Hendecane \$\$ n-C11H24 \$\$ UN 2330

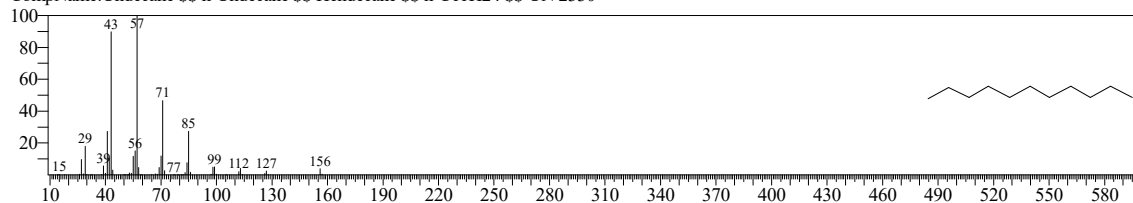

Hit#:4 Entry:40226 Library:NIST20M1.lib

SI:86 Formula:C13H28 CAS:629-50-5 MolWeight:184 RetIndex:1300

CompName:Tridecane \$\$ n-Tridecane \$\$ Tridecane, n-

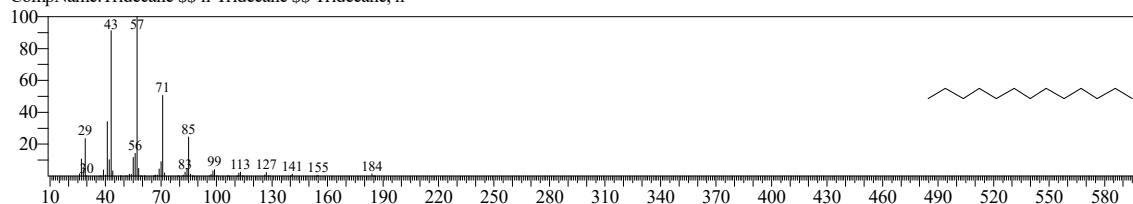

Hit#:5 Entry:8094 Library:NIST20M1.lib

SI:86 Formula:C9H20 CAS:3074-75-7 MolWeight:128 RetIndex:788

CompName:Hexane, 4-ethyl-2-methyl- \$\$ 4-Ethyl-2-methylhexane \$\$ 2-Methyl-4-ethylhexane \$\$ Hexane, 3-ethyl-5-methyl

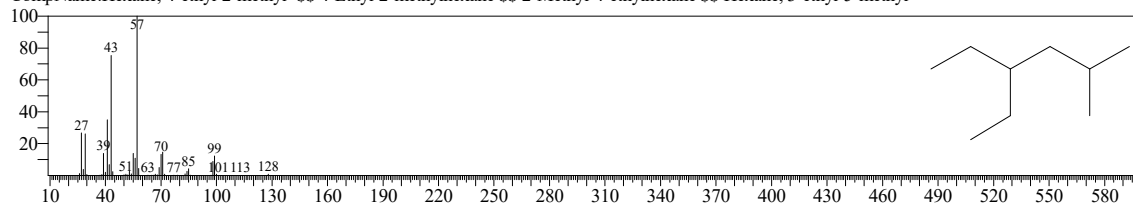

# TNAU

<< Target >>

Line#:2 R.Time:9.685(Scan#:1038) MassPeaks:294

RawMode:Averaged 9.680-9.690(1037-1039) BasePeak:57.10(5329)

BG Mode:Calc. from Peak Group 1 - Event 1 Q3 Scan

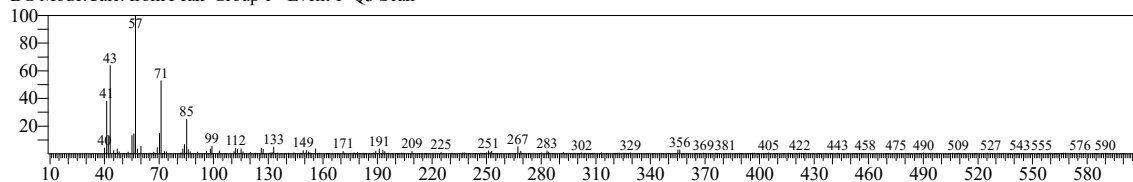

Hit#:1 Entry:30057 Library:NIST20M1.lib

SI:87 Formula:C12H26 CAS:112-40-3 MolWeight:170 RetIndex:1200

CompName:Dodecane \$\$ n-Dodecane \$\$ Adakane 12 \$\$ Ba 51-090453 \$\$ CH3(CH2)10CH3 \$\$ Bihexyl \$\$ Dihexyl \$\$ Duodecane \$\$ NSC 8714

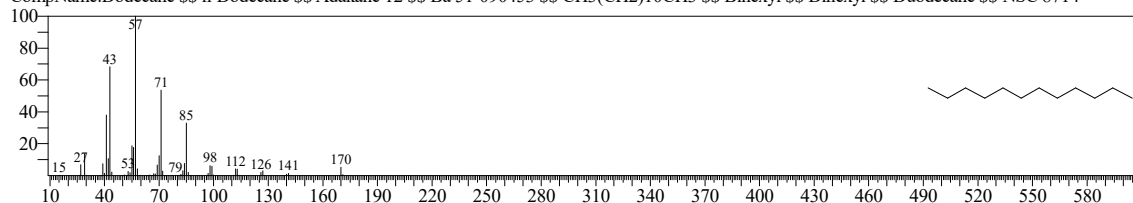

Hit#:2 Entry:40226 Library:NIST20M1.lib

SI:86 Formula:C13H28 CAS:629-50-5 MolWeight:184 RetIndex:1300

CompName:Tridecane \$\$ n-Tridecane \$\$ Tridecane, n-

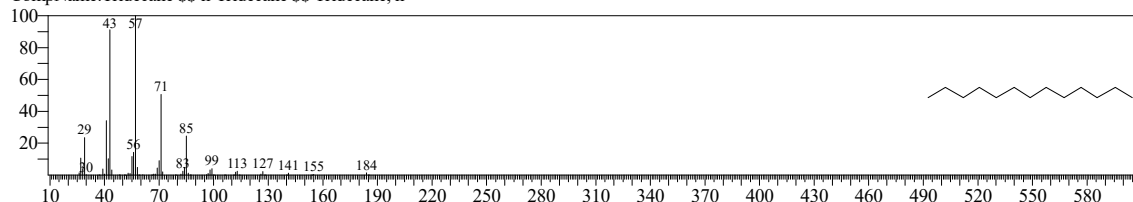

Hit#:3 Entry:21042 Library:NIST20M1.lib

SI:86 Formula:C11H24 CAS:1120-21-4 MolWeight:156 RetIndex:1100

CompName:Undecane \$\$ n-Undecane \$\$ Hendecane \$\$ n-C11H24 \$\$ UN 2330

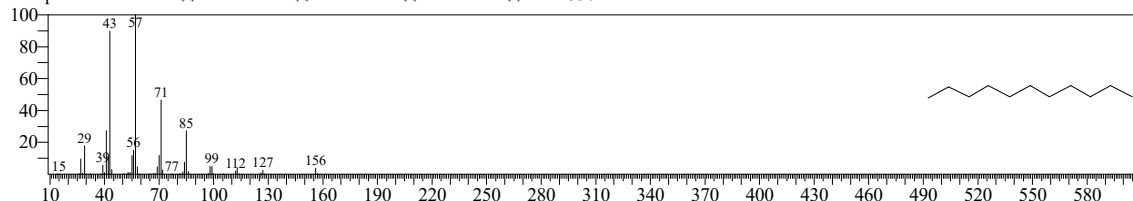

Hit#:4 Entry:22497 Library:NIST20R.lib

SI:86 Formula:C14H30 CAS:629-59-4 MolWeight:198 RetIndex:1400

CompName:Tetradecane \$\$ n-Tetradecane

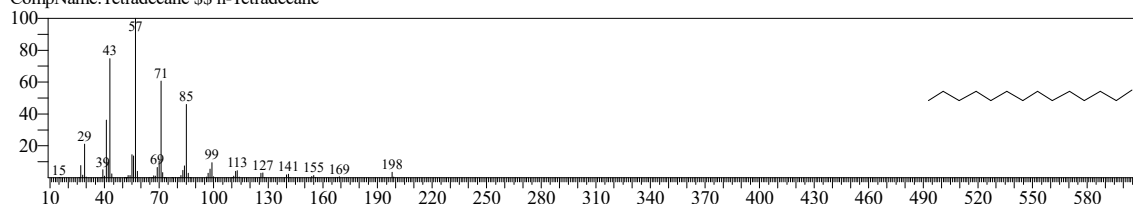

Hit#:5 Entry:27737 Library:NIST20R.lib

SI:86 Formula:C16H34 CAS:544-76-3 MolWeight:226 RetIndex:1600

CompName:Hexadecane \$\$ n-Cetane \$\$ n-Hexadecane \$\$ Cetane

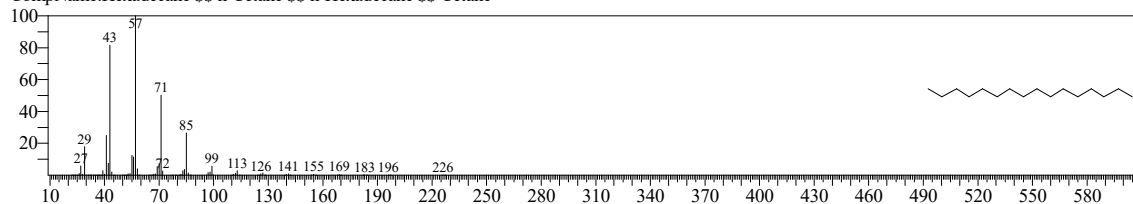

<< Target >>

Line#3 R.Time:31.905(Scan#:5482) MassPeaks:292

RawMode:Averaged 31.900-31.910(5481-5483) BasePeak:208.10(848)

BG Mode:Calc. from Peak Group 1 - Event 1 Q3 Scan

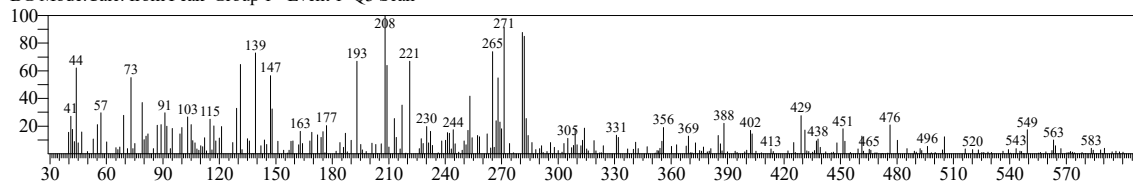

Hit#1 Entry:535 Library:OA\_TMS\_DB5\_67min\_V3.lib

SI:33 Formula:C22H44N4O5Si4 CAS:58-63-9 MolWeight:556 RetIndex:2605

CompName:Inosine-4TMS ; 9-[(2R,3R,4S,5R)-3,4-dihydroxy-5-(hydroxymethyl)oxolan-2-yl]-3H-purin-6-one

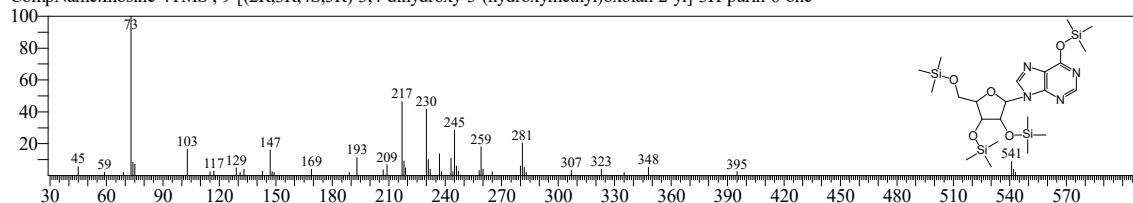

Hit#2 Entry:211 Library:OA\_TMS\_DB5\_67min\_V3.lib

SI:32 Formula:C13H22O3Si2 CAS:99-96-7 MolWeight:282 RetIndex:1636

CompName:4-Hydroxybenzoic acid-2TMS ; 4-hydroxybenzoic acid

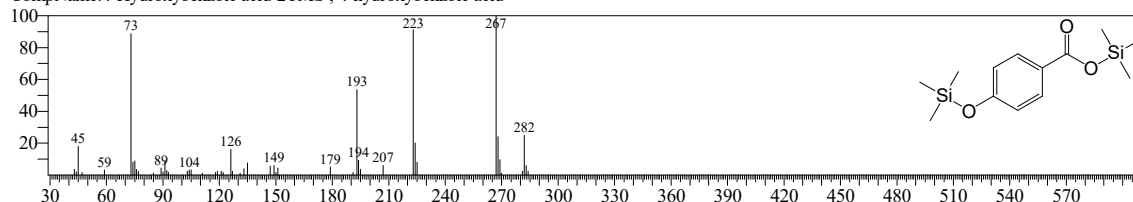

Hit#3 Entry:179 Library:OA\_TMS\_DB5\_67min\_V3.lib

SI:32 Formula:C13H22O3Si2 CAS:99-06-9 MolWeight:282 RetIndex:1572

CompName:3-Hydroxybenzoic acid-2TMS ; 3-hydroxybenzoic acid

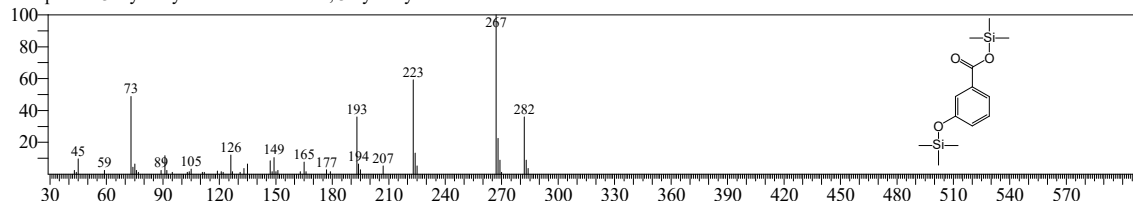

Hit#4 Entry:438 Library:OA\_TMS\_DB5\_67min\_V3.lib

SI:31 Formula:C12H22N2O2Si2 CAS:104-98-3 MolWeight:282 RetIndex:2014

CompName:Urocanic acid-2TMS ; (E)-3-(1H-imidazol-5-yl)prop-2-enoic acid

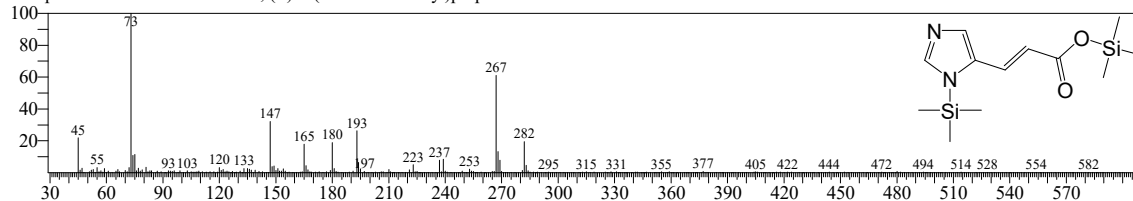

Hit#5 Entry:194 Library:OA\_TMS\_DB5\_67min\_V3.lib

SI:31 Formula:C15H26O3Si2 CAS:828-01-3 MolWeight:310 RetIndex:1599

CompName:3-Phenyllactic acid-2TMS ; 2-hydroxy-3-phenylpropanoic acid

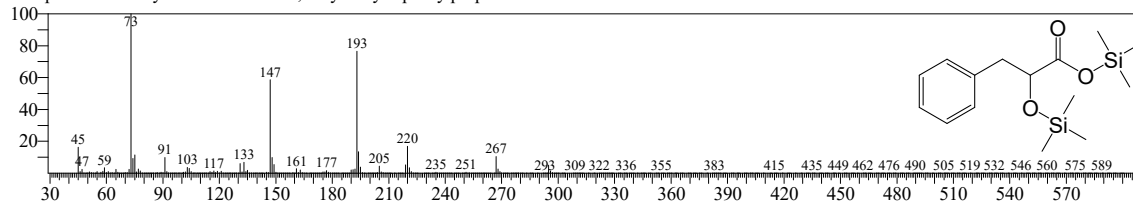

# TNAU

<< Target >>

Line#:4 R.Time:32.510(Scan#:5603) MassPeaks:295

RawMode:Averaged 32.505-32.515(5602-5604) BasePeak:207.05(1077)

BG Mode:Calc. from Peak Group 1 - Event 1 Q3 Scan

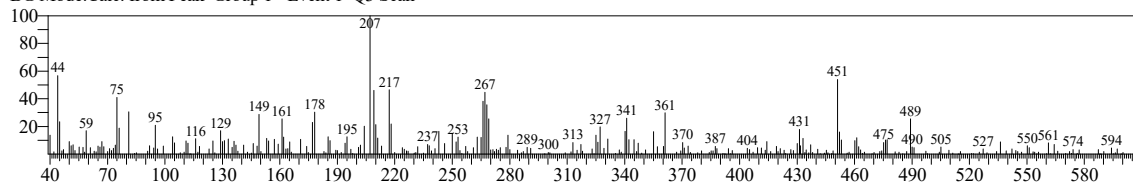

Hit#:1 Entry:555 Library:OA TMS DB5 67min V3.lib

SI:28 Formula:C39H96O11Si9 CAS:585-86-4 MolWeight:992 RetIndex:2845

CompName:Lactitol-9TMS ; (2S,3R,4R,5R)-4-[(2S,3R,4S,5R,6R)-3,4,5-trihydroxy-6-(hydroxymethyl)oxan-2-yl]oxyhexane-1,2,3,5,6-pentol

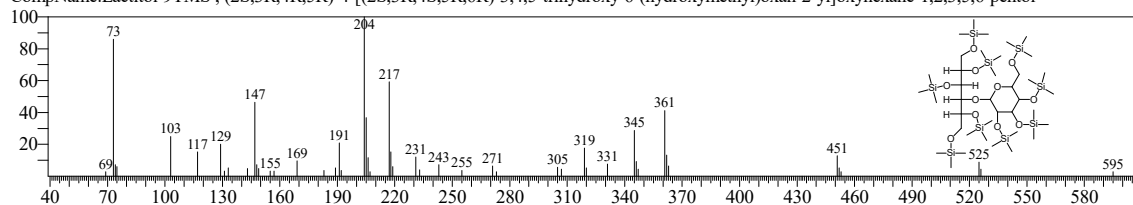

Hit#:2 Entry:179 Library:OA TMS DB5 67min V3.lib

SI:27 Formula:C13H22O3Si2 CAS:99-06-9 MolWeight:282 RetIndex:1572

CompName:3-Hydroxybenzoic acid-2TMS ; 3-hydroxybenzoic acid

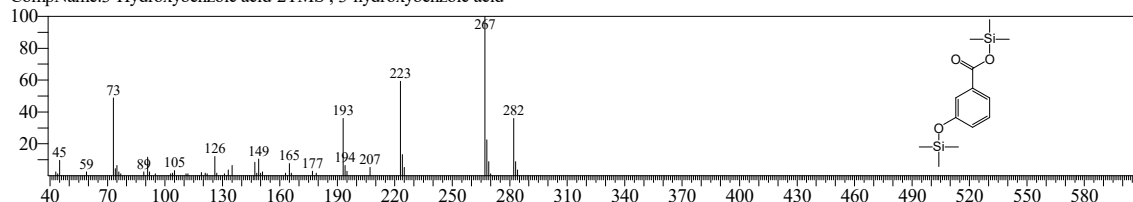

Hit#:3 Entry:559 Library:OA TMS DB5 67min V3.lib

SI:27 Formula:C39H96O11Si9 CAS:585-88-6 MolWeight:992 RetIndex:2923

CompName:Maltitol-9TMS ; (2S,3R,4R,5R)-4-[(2R,3R,4S,5S,6R)-3,4,5-trihydroxy-6-(hydroxymethyl)oxan-2-yl]oxyhexane-1,2,3,5,6-pentol

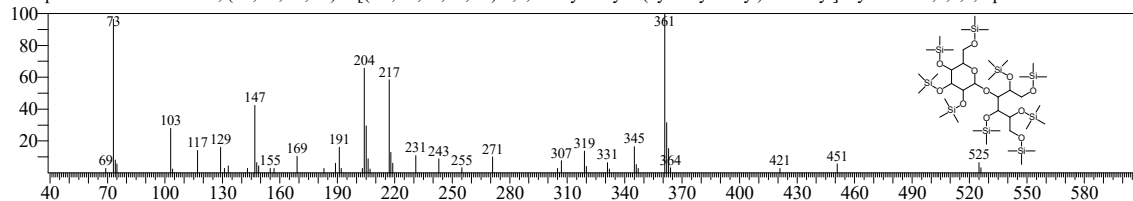

Hit#:4 Entry:341 Library:OA TMS DB5 67min V3.lib

SI:25 Formula:C18H34O4Si3 CAS:3247-75-4 MolWeight:398 RetIndex:1864

CompName:3-(3-Hydroxyphenyl)-3-hydroxypropionic acid-3TMS ; 3-hydroxy-3-(3-hydroxyphenyl)propanoic acid

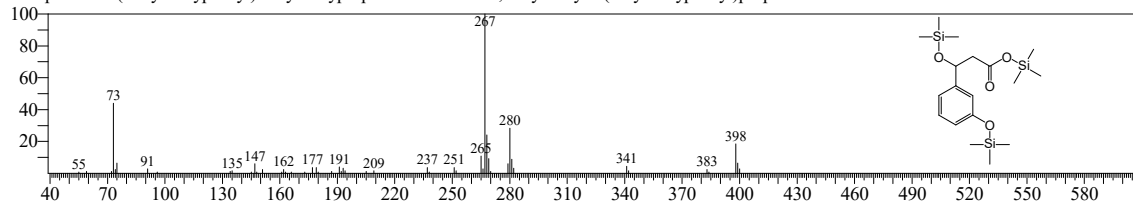

Hit#:5 Entry:203 Library:OA TMS DB5 67min V3.lib

SI:25 Formula:C13H23NO2Si2 CAS:118-92-3 MolWeight:281 RetIndex:1623

CompName:Anthranilic acid-2TMS ; 2-aminobenzoic acid

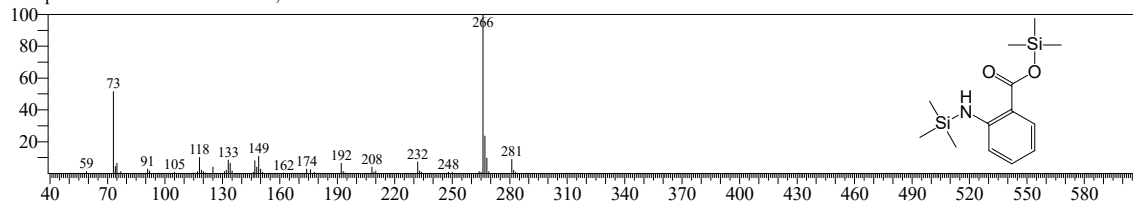

Supplement: Supplementary file 70 [file supplementary]
