# Supplementary material for: Comparative Metabolomics Profiling Reveals Key Metabolites and Associated Pathways Regulating Tuber Dormancy in White Yam (<em>Dioscorea rotundata</em>)
Source: Preprints.org preprint supplement (doi:10.20944/preprints202303.0378.v1), 2023-03-21
Supplement: Supplementary file 12 [file supplementary]

|        | PC1      | PC2      | PC3      | PC4      | PC5      | PC6      | PC7      | PC8      |
|--------|----------|----------|----------|----------|----------|----------|----------|----------|
| 42     | -0.18202 | -0.1044  | 0.34439  | 0.024943 | -0.25412 | -0.2098  | 0.001593 | 0.18476  |
| 43     | -0.10765 | 0.014159 | 0.050064 | 0.092122 | -0.05121 | 0.070356 | -0.01756 | 0.015367 |
| 44     | -0.00649 | 0.11442  | 0.087351 | -0.03789 | -0.276   | -0.06511 | 0.018598 | 0.038764 |
| 55     | 0.028953 | 0.28897  | 0.38414  | -0.17562 | 0.16488  | -0.00473 | 0.24693  | -0.11351 |
| 57     | -0.08894 | 0.042124 | 0.036068 | -0.07746 | -0.05865 | 0.10614  | 0.16845  | 0.00764  |
| 58     | 0.041758 | 0.40145  | -0.18964 | -0.00501 | 0.22413  | -0.31517 | 0.1644   | 0.65183  |
| 59     | -0.07184 | 0.13295  | -0.3317  | -0.03874 | -0.31389 | 0.19915  | 0.16489  | 0.033132 |
| 60     | 0.15929  | 0.013197 | 0.11989  | 0.38079  | -0.07539 | 0.15679  | -0.02402 | 0.16023  |
| 61     | 0.13024  | 0.11992  | 0.066899 | -0.13987 | -0.03145 | 0.16305  | 0.24124  | -0.00512 |
| 67     | -0.21496 | -0.08751 | -0.08419 | 0.2531   | 0.086184 | 0.16882  | 0.006342 | -0.21078 |
| 69     | -0.15861 | 0.28885  | 0.038933 | 0.07656  | -0.07661 | 0.027537 | 0.10615  | -0.0359  |
| 71.025 | 0.065493 | 0.32512  | -0.0008  | 0.36068  | -0.16458 | 0.12965  | -0.0091  | -0.32293 |
| 73     | 0.0889   | -0.05861 | -0.02102 | -0.0007  | 0.069543 | -0.07468 | -0.15613 | 0.015419 |
| 79     | -0.5418  | -0.13223 | -0.17872 | 0.19092  | 0.011103 | 0.061277 | 0.16169  | 0.29532  |
| 82     | 0.058758 | 0.13509  | 0.18616  | 0.25342  | -0.09473 | 0.054514 | 0.004511 | 0.089384 |
| 83     | -0.19924 | 0.10912  | 0.14522  | 0.16755  | -0.00997 | -0.00379 | -0.00302 | 0.010324 |
| 84     | 0.25161  | -0.0147  | -0.01476 | 0.085226 | -0.32906 | 0.17736  | 0.067225 | 0.16711  |
| 85     | -0.37582 | 0.31857  | -0.22943 | -0.07619 | 0.12053  | 0.13969  | 0.25228  | -0.2507  |
| 98     | -0.14847 | 0.061183 | 0.32674  | 0.018502 | -0.04981 | -0.09443 | -0.01088 | 0.010041 |
| 100    | 0.034538 | 0.16962  | 0.17035  | 0.29967  | -0.19113 | 0.017224 | -0.0414  | 0.10912  |
| 104    | 0.020198 | -0.0705  | 0.23144  | -0.14078 | 0.27733  | 0.15222  | 0.21392  | -0.04334 |
| 108    | -0.04187 | 0.17687  | 0.32305  | -0.13386 | 0.013998 | -0.04112 | 0.14     | -0.05026 |
| 122    | -0.15411 | -0.13707 | 0.2196   | 0.009888 | 0.066694 | 0.022618 | 0.009515 | 0.025794 |
| 126    | 0.12969  | 0.045139 | -0.07498 | -0.18778 | -0.31297 | 0.15     | 0.18268  | 0.061616 |
| 133    | 0.077455 | -0.09081 | 0.10912  | 0.23107  | 0.24208  | 0.24399  | 0.099415 | 0.063637 |
| 135    | -0.17298 | -0.12062 | 0.044715 | -0.27719 | -0.34184 | -0.04014 | 0.033342 | 0.038633 |
| 138.05 | 0.1947   | -0.25206 | -0.04019 | 0.069153 | 0.11692  | 0.21451  | 0.44048  | 0.12155  |
| 139    | -0.05502 | -0.16674 | 0.071659 | -0.18738 | -0.26968 | -0.00053 | 0.17884  | -0.0527  |
| 149    | -0.32051 | -0.19654 | 0.081825 | 0.086653 | -0.04744 | -0.00404 | -0.08708 | 0.051514 |
| 155.05 | 0.089827 | -0.14463 | 0.010357 | 0.025742 | -0.03173 | 0.19587  | 0.10416  | 0.09191  |
| 207.05 | 0.09527  | -0.24767 | -0.06522 | 0.31962  | -0.06173 | -0.57803 | 0.55225  | -0.24795 |
| 281.05 | 0.098775 | 0.15148  | -0.16943 | 0.031785 | -0.07683 | -0.31505 | -0.07646 | -0.21594 |

| PC9      | PC10     | PC11     | PC12     | PC13     | PC14     | PC15     | PC16     | PC17     |
|----------|----------|----------|----------|----------|----------|----------|----------|----------|
| -0.10552 | -0.41891 | -0.40199 | -0.17946 | -0.1837  | 0.23908  | 0.12977  | 0.13808  | 0.31446  |
| -0.01408 | -0.23072 | 0.26163  | -0.18029 | 0.090844 | 0.19563  | -0.80783 | 0.31126  | -0.00402 |
| -0.03281 | -0.09331 | -0.03498 | -0.03875 | -0.17081 | -0.04537 | 0.028059 | 0.008302 | -0.0307  |
| -0.01085 | 0.10723  | 0.000829 | -0.04202 | 0.08638  | 0.088262 | -0.04551 | -0.03424 | -0.08453 |
| 0.28263  | 0.059298 | -0.23923 | -0.07202 | 0.14006  | -0.67087 | -0.23916 | 0.068999 | 0.17883  |
| -0.07645 | 0.19951  | 0.078041 | -0.17063 | -0.23594 | -0.01311 | -0.01891 | 0.092464 | 0.049988 |
| 0.12046  | -0.05996 | -0.12742 | 0.058052 | 0.12866  | 0.19283  | 0.03339  | 0.045665 | -0.13931 |
| 0.018471 | -0.10402 | 0.17892  | 0.066142 | 0.064866 | -0.07621 | 0.13981  | 0.062285 | 0.01347  |
| 0.087387 | -0.02209 | 0.060836 | -0.10799 | 0.080812 | 0.10462  | 0.090214 | 0.098777 | -0.00773 |
| -0.09894 | 0.086574 | 0.2479   | -0.38249 | -0.54757 | -0.12602 | 0.048646 | 0.04409  | -0.15509 |
| -0.01027 | -0.03748 | -0.07388 | 0.2088   | 0.1055   | 0.069301 | -0.06992 | -0.12866 | -0.09414 |
| -0.10943 | 0.46426  | -0.40575 | -0.20857 | -0.05498 | 0.13183  | -0.03176 | 0.14486  | 0.1852   |
| -0.03605 | 0.022747 | -0.01645 | 0.075696 | 0.087691 | -0.34675 | 0.063878 | 0.465    | 0.34004  |
| -0.03078 | 0.21262  | -0.02368 | -0.05779 | 0.37894  | 0.081885 | 0.069511 | -0.0222  | 0.043414 |
| -0.01748 | -0.06135 | 0.13706  | 0.11194  | 0.034665 | -0.0996  | 0.042317 | -0.05003 | -0.02506 |
| -0.02763 | -0.00594 | -0.01153 | 0.13492  | 0.082092 | -0.02655 | -0.00849 | -0.09572 | -0.08788 |
| 0.092163 | -0.06027 | 0.19956  | -0.10924 | -0.01196 | -0.0836  | 0.15168  | 0.11152  | -0.03755 |
| -0.04306 | -0.42072 | 0.16249  | 0.15162  | -0.17805 | -0.12306 | 0.19418  | 0.053946 | 0.26735  |
| -0.04453 | 0.062754 | 0.10184  | -0.00157 | -0.02069 | -0.17024 | -0.00713 | -0.11682 | -0.08823 |
| -0.03663 | -0.0655  | 0.14221  | 0.17019  | 0.006538 | -0.15286 | 0.007517 | -0.10784 | -0.0538  |
| 0.077425 | 0.032469 | 0.052177 | -0.22507 | 0.13081  | 0.12897  | 0.16449  | 0.17835  | 0.033702 |
| -0.01524 | 0.049241 | 0.088011 | -0.03504 | 0.006919 | -0.06521 | -0.01514 | -0.08003 | -0.04479 |
| 0.021681 | 0.062767 | 0.059621 | -0.13191 | 0.05246  | -0.05445 | 0.10888  | 0.046942 | -0.06633 |
| 0.11784  | -0.00311 | 0.080144 | -0.16096 | 0.007972 | 0.022916 | 0.094438 | 0.092718 | -0.08331 |
| 0.069427 | -0.07372 | 0.065032 | -0.06104 | 0.18536  | 0.13456  | 0.20916  | 0.20193  | 0.05831  |
| 0.066782 | 0.12611  | 0.048676 | -0.22954 | -0.06798 | -0.13322 | 0.048018 | -0.00986 | -0.18913 |
| -0.54093 | -0.16607 | -0.3466  | 0.026602 | -0.06612 | -0.21259 | -0.15127 | -0.10234 | -0.24024 |
| -0.49598 | 0.35527  | 0.32898  | 0.33694  | -0.00943 | 0.075514 | -0.0032  | 0.18686  | 0.28455  |
| 0.018464 | 0.071015 | -0.02282 | -0.0655  | 0.060233 | -0.06414 | 0.084591 | 0.004157 | -0.14469 |
| 0.11106  | 0.055276 | 0.13163  | -0.18986 | -0.05091 | 0.065363 | -0.14202 | -0.62217 | 0.59041  |
| 0.31008  | 0.020382 | 0.078276 | 0.081493 | -0.03301 | 0.037143 | -0.0223  | 0.040641 | -0.00759 |
| -0.40388 | -0.19735 | 0.16115  | -0.47792 | 0.49247  | -0.13979 | 0.12915  | -0.14581 | 0.018264 |

PC18

0.1649  
-0.04003  
-0.58095  
0.18603  
0.076315  
0.099968  
0.46452  
-0.09722  
-0.16493  
0.17004  
0.0435  
-0.10082  
0.10178  
-0.29911  
-0.00442  
0.21959  
0.037895  
-0.0989  
-0.08782  
0.15794  
-0.0121  
-0.04617  
0.066356  
-0.17417  
0.10699  
0.16603  
-0.03306  
0.10222  
0.008442  
0.073877  
0.000871  
0.069522
