# Supplementary material for: Comparative Metabolomics Profiling Reveals Key Metabolites and Associated Pathways Regulating Tuber Dormancy in White Yam (<em>Dioscorea rotundata</em>)
Source: Preprints.org preprint supplement (doi:10.20944/preprints202303.0378.v1), 2023-03-21
Supplement: Supplementary file 17 [file supplementary]

| M/z    | PC1      | PC2      | PC3      | PC4      | PC5      | PC6      | PC7      | PC8      |
|--------|----------|----------|----------|----------|----------|----------|----------|----------|
| 42     | -0.19535 | 0.36057  | -0.11035 | 0.028485 | -0.13389 | -0.34207 | 0.15151  | 0.40744  |
| 43     | -0.06053 | -0.02949 | 0.12399  | 0.081631 | 0.007596 | 0.022204 | 0.2369   | -0.05611 |
| 44     | 0.2576   | -0.06833 | -0.03679 | -0.03634 | -0.07119 | -0.06763 | 0.30658  | 0.035942 |
| 45     | 0.046287 | -0.06551 | 0.52693  | 0.068034 | -0.02401 | -0.11988 | 0.083192 | -0.10945 |
| 55     | -0.33391 | 0.063941 | 0.077833 | 0.065665 | -0.0212  | 0.087452 | 0.007764 | -0.19735 |
| 57     | 0.032958 | 0.052198 | 0.022189 | 0.03651  | 0.002128 | -0.06256 | 0.009346 | -0.17313 |
| 58     | 0.15596  | 0.11979  | -0.01118 | -0.13871 | -0.48845 | 0.12856  | 0.39001  | -0.05592 |
| 59     | -0.15493 | 0.032863 | 0.16204  | 0.11805  | -0.04887 | 0.06781  | 0.032804 | -0.11579 |
| 60     | -0.17299 | -0.00626 | -0.00901 | 0.1325   | -0.00871 | 0.11463  | 0.055223 | -0.11209 |
| 61     | 0.17694  | 0.05315  | 0.018283 | 0.053584 | -0.05315 | -0.01199 | 0.013171 | 0.042235 |
| 67     | -0.26223 | 0.046967 | 0.16301  | 0.12017  | -0.04157 | 0.085103 | 0.013155 | -0.16771 |
| 69     | -0.22414 | -0.17982 | -0.34958 | 0.069684 | -0.0546  | 0.32044  | 0.24287  | -0.16852 |
| 71     | 0.020865 | 0.34894  | 0.18269  | -0.11028 | 0.21189  | 0.7402   | 0.039897 | 0.28894  |
| 73     | -0.0098  | 0.000564 | -0.01419 | -0.16947 | 0.03741  | -0.09552 | 0.15953  | -0.15387 |
| 75     | 0.061295 | -0.18127 | -0.26361 | -0.04498 | -0.0178  | 0.039767 | 0.050798 | -0.15898 |
| 83     | 0.055136 | -0.22046 | 0.33934  | 0.23055  | -0.05784 | 0.060041 | 0.10839  | 0.077255 |
| 84     | 0.18857  | -0.10922 | -0.35641 | -0.11647 | 0.014632 | 0.02508  | 0.058549 | 0.1506   |
| 85     | 0.14527  | 0.21973  | 0.025373 | 0.042675 | -0.07071 | -0.03562 | -0.03828 | -0.04575 |
| 89.05  | 0.064532 | -0.02363 | -0.16711 | 0.44353  | -0.04272 | 0.21461  | -0.05847 | 0.3082   |
| 100    | 0.01802  | -0.05744 | 0.026601 | 0.063062 | -0.03168 | 0.046577 | 0.053544 | 0.015737 |
| 102    | -0.10743 | 0.054502 | 0.025439 | 0.050426 | -0.03599 | 0.055867 | 0.022368 | -0.09138 |
| 103    | 0.15272  | 0.089881 | -0.02033 | 0.030343 | -0.03186 | 0.000321 | -0.00804 | 0.054061 |
| 104    | -0.18373 | 0.2181   | -0.23578 | -0.09276 | -0.0143  | 0.050382 | -0.0306  | -0.17582 |
| 122    | 0.095083 | 0.29189  | -0.03558 | 0.005732 | -0.06737 | -0.03545 | -0.06029 | -0.09534 |
| 126    | 0.004305 | 0.53266  | -0.04947 | -0.0229  | -0.08661 | -0.05818 | -0.13352 | -0.24139 |
| 135    | -0.02455 | 0.04421  | -0.05357 | 0.01446  | -0.02955 | 0.039906 | 0.021681 | -0.04152 |
| 138.05 | -0.23092 | -0.05935 | -0.02899 | -0.18714 | 0.18031  | -0.04124 | -0.45854 | 0.12977  |
| 139    | 0.074877 | 0.019209 | 0.046833 | 0.11701  | -0.11004 | 0.054896 | -0.03198 | 0.194    |
| 149    | 0.08478  | 0.025814 | -0.1071  | -0.01662 | -0.01921 | 0.026001 | 0.074858 | 0.047745 |
| 151    | 0.22171  | 0.242    | 0.10588  | 0.082067 | -0.08893 | -0.06019 | -0.04669 | -0.02677 |
| 155.05 | -0.4921  | 0.041031 | -0.0124  | 0.10766  | -0.0926  | -0.21299 | 0.2748   | 0.38359  |
| 207.05 | 0.13933  | 0.1864   | -0.10543 | 0.34816  | 0.72238  | -0.16559 | 0.33315  | -0.09771 |
| 263.15 | -0.14631 | 0.064594 | -0.06501 | 0.021958 | 0.026522 | 0.039918 | 0.17955  | -0.24649 |
| 281.05 | -0.05925 | 2.20E-05 | 0.17982  | -0.62773 | 0.26437  | -0.00585 | 0.30084  | 0.129    |

| PC9      | PC10     | PC11     | PC12     |
|----------|----------|----------|----------|
| -0.12561 | 0.14443  | -0.04225 | 0.15314  |
| 0.43916  | 0.061643 | -0.46567 | -0.09973 |
| 0.099211 | -0.23644 | 0.19297  | -0.56771 |
| -0.2124  | 0.14688  | -0.16177 | -0.2898  |
| 0.19501  | -0.21366 | 0.29608  | -0.29501 |
| -0.03583 | 0.37699  | 0.38725  | -0.10146 |
| 0.082961 | -0.24364 | -0.16721 | 0.16977  |
| 0.024681 | -0.03623 | -0.01926 | 0.27179  |
| 0.062858 | 0.048975 | 0.11269  | 0.12127  |
| -0.07593 | 0.090503 | 0.10364  | -0.1381  |
| 0.071986 | -0.14331 | 0.17247  | 0.08624  |
| -0.68214 | 0.019265 | -0.16039 | -0.13792 |
| 0.032148 | 0.14787  | -0.044   | -0.12836 |
| -0.0375  | 0.15274  | -0.119   | -0.06682 |
| 0.22177  | 0.16577  | -0.13696 | -0.0592  |
| -0.1031  | 0.058256 | 0.080942 | 0.020172 |
| 0.10243  | 0.13507  | 0.20885  | -0.1207  |
| -0.09334 | 0.059779 | 0.051077 | 0.093291 |
| 0.17489  | 0.15644  | 0.07908  | 0.002012 |
| 0.01513  | 0.044757 | 0.079761 | 0.036391 |
| 0.055019 | -0.01339 | 0.012612 | -0.06236 |
| -0.03667 | -0.02006 | -0.36187 | -0.05396 |
| 0.17029  | -0.04423 | -0.00947 | -0.04413 |
| -0.05717 | 0.036982 | 0.02728  | -0.10703 |
| -0.05112 | -0.02233 | -0.05892 | -0.21342 |
| 0.050457 | 0.022527 | 0.054161 | 0.050641 |
| -0.0699  | -0.21758 | -0.22399 | -0.24216 |
| -0.13844 | -0.58164 | 0.13967  | 0.064572 |
| 0.009913 | -0.19182 | 0.082305 | 0.049833 |
| -0.16667 | 0.080314 | 0.056461 | -0.01301 |
| 0.017409 | 0.086919 | 0.003    | -0.24789 |
| -0.03613 | -0.21518 | -0.06751 | 0.063134 |
| 0.008778 | 0.076682 | 0.092299 | 0.16109  |
| -0.0412  | -0.0037  | 0.20438  | 0.15956  |
