# Supplementary material for: Comparative Metabolomics Profiling Reveals Key Metabolites and Associated Pathways Regulating Tuber Dormancy in White Yam (<em>Dioscorea rotundata</em>)
Source: Preprints.org preprint supplement (doi:10.20944/preprints202303.0378.v1), 2023-03-21
Supplement: Supplementary file 69 [file supplementary]

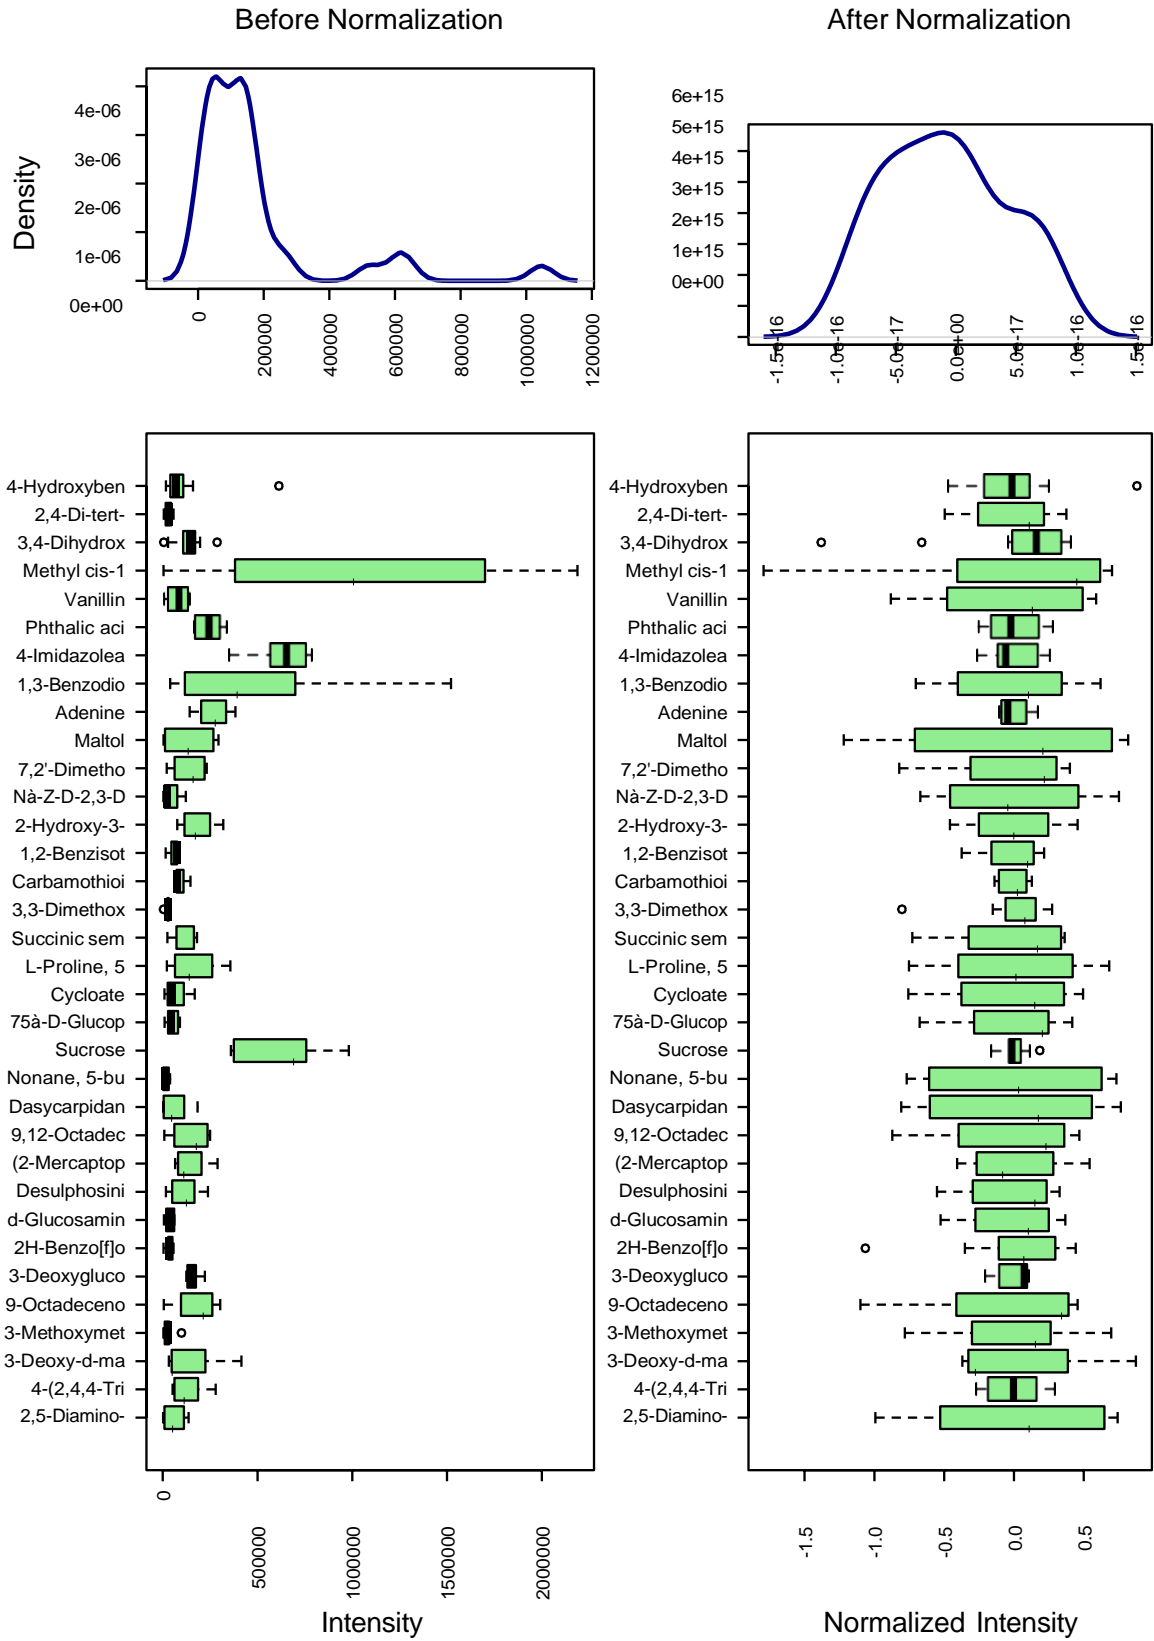

Figure 1: Box plots and kernel density plots before and after normalization for *Obiaoturugo*. The boxplots show at most 50 features due to space limit. The density plots are based on all samples. Selected methods : Row- wise normalization: Normalization to constant sum; Data transformation: Log10 Normalization; Data scaling: Mean Centering.
